# Supplementary material for: Compartment-specific and ELAVL1-coordinated regulation of intronic polyadenylation isoforms by doxorubicin
Source: HighWire-hosted journal article supplement (doi:10.1101/gr.276192.121), 2022-07-01
Supplement: Supplemental_Table_S1.xlsx.xlsx [file Supplemental_Table_S1.xlsx.xlsx]

## Sheet: Sheet1
Supplemental Table S1 : List of IPA isoforms regulated by 6-hour doxorubicin in whole MCF-7 cells by 3’-seq analysis.
IPA peaks	baseMean	log2FoldChange IPA:LE	lfcSE	stat	pvalue	padj	45	57	69	44	56	68	LE,45	LE,57	LE,69	LE,44	LE,56	LE,68	%IPA(+doxo)	%IPA(-doxo)	log2FC_IPA	log2FC_LE	log2FC IPA-logFC LE	gene	Tian polyA site	Zavolan polyA site
chrX:70587122-70587287:mpeak_199764|chrX_70586088_70749562_TAF1_NR_+mpeak_199764|chrX_70586088_70683673_TAF1_NM_+||	116.923	2.11448	0.738542	-2.86305	0.00419585	0.0783697	69.3535	32.1525	30.6587	17.2808	28.438	13.6822	138.707	99.1368	173.094	213.129	210.652	376.786	32.1617	7.41985	1.15378	-0.962102	2.11588	TAF1	chrX:70587179:+	-
chr9:94662225-94662283:mpeak_192487|chr9_94487389_94712444_ROR2_NM_-|	10.6328	4.66373	1.62643	-2.86746	0.00413775	NA	3.08238	6.69843	7.66468	1.15205	1.05326	0	13.8707	4.01906	12.7745	17.2808	8.42607	51.5713	56.892	4.28059	2.9838	-1.3335	4.31731	ROR2	chr9:94662230:-	chr9_91899951_-
chr9:88916200-88916525:mpeak_192213|chr9_88903659_88969402_ZCCHC6_NM_-|	79.834	1.88599	0.876491	-2.15175	0.0314168	0.184064	151.037	131.289	98.3634	163.591	184.32	68.9372	4.62357	13.3969	13.4132	25.3451	29.4912	74.1996	1211.09	323.049	-0.13091	-2.03739	1.90648	ZCCHC6	chr9:88916208:-	chr9_86301532_-
chr9:5097671-5097730:mpeak_189320|chr9_4985244_5126683_JAK2_NM_+|	18.0556	2.83787	1.06728	-2.65899	0.00783764	NA	9.24714	6.69843	5.10979	2.3041	1.05326	1.05248	36.9886	20.0953	21.0779	47.2341	35.8108	29.9956	26.9382	3.90111	2.25539	-0.532305	2.7877	JAK2	chr9:5097707:+	-
chr9:5093686-5093901:mpeak_189314|chr9_4985244_5126683_JAK2_NM_+|	24.838	1.98046	0.758621	-2.6106	0.00903832	0.106993	35.4474	21.435	21.0779	11.5205	9.47933	7.89357	36.9886	20.0953	21.0779	47.2341	35.8108	29.9956	99.7422	25.5602	1.432	-0.532305	1.9643	JAK2	chr9:5093799:+	chr9_5093788_+
chr9:5093228-5093312:mpeak_189312|chr9_4985244_5126683_JAK2_NM_+|	19.251	3.36921	1.0211	-3.29959	0.000968277	NA	15.4119	10.7175	8.94213	0	3.15978	1.57871	36.9886	20.0953	21.0779	47.2341	35.8108	29.9956	44.8704	6.28778	2.8878	-0.532305	3.42011	JAK2	chr9:5093277:+	chr9_5093278_+
chr9:5092352-5092416:mpeak_189309|chr9_4985244_5126683_JAK2_NM_+|	133.464	2.15316	0.759936	-2.83335	0.00460635	0.0809926	531.711	234.445	295.729	183.176	92.6868	72.6209	36.9886	20.0953	21.0779	47.2341	35.8108	29.9956	1358.57	308.282	1.60746	-0.532305	2.13977	JAK2	chr9:5092410:+	chr4_88040415_+
chr9:37464543-37464636:mpeak_190725|chr9_37442552_37465407_ZBTB5_NM_-|	25.4911	2.6348	1.19643	-2.20222	0.02765	0.172301	6.16476	8.03812	16.6068	11.5205	10.5326	1.05248	7.70595	16.0762	22.994	54.1464	33.7043	117.351	65.8661	11.2599	0.415144	-2.1332	2.54834	ZBTB5	chr9:37464552:-	chr9_37464557_-
chr9:13120139-13120216:mpeak_189575|chr9_13107110_13279563_MPDZ_NM_-|	33.7132	1.9857	0.850308	-2.33527	0.0195292	0.146386	6.16476	8.03812	7.02596	3.45615	3.15978	1.57871	46.2357	46.889	61.9562	79.4915	75.8346	64.7273	13.6889	3.72393	1.37327	-0.504833	1.87811	MPDZ	chr9:13120104:-;chr9:13120140:-	chr9_13120100_-;chr9_13120142_-
chr9:123593942-123594110:mpeak_194956|chr9_123580441_123605299_PSMD5_NM_-|	123.312	2.598	1.06221	-2.44584	0.0144516	0.129124	12.3295	10.7175	20.4392	3.45615	4.21303	6.84109	114.048	64.305	286.787	192.392	159.042	605.174	9.34905	1.51685	1.58348	-1.04026	2.62374	PSMD5	chr9:123593946:-	chr9_120831654_-
chr8:70533339-70533552:mpeak_183047|chr8_70378858_70570739_SULF1_NM_+|	66.1149	2.33528	1.10009	-2.12281	0.0337696	0.191342	52.4005	20.0953	9.58085	10.3685	6.31955	0.526238	138.707	73.6828	133.493	112.901	101.113	134.191	23.7296	4.94372	2.25337	-0.00965045	2.26302	SULF1	chr8:70533556:+	-
chr8:42023240-42023306:mpeak_181685|chr8_42010463_42026478_AP3M2_NM_+|	55.0415	2.73586	1.04666	-2.61389	0.00895177	0.106587	4.62357	5.35875	12.1357	1.15205	1.05326	1.05248	87.8478	109.854	136.048	88.7079	86.3672	126.297	6.62713	1.08098	2.76326	0.147222	2.61604	AP3M2	chr8:42023300:+;chr8:42023330:+	chr8_42165809_+
chr8:19701654-19701805:mpeak_180510|chr8_19674917_19709159_INTS10_NM_+|	20.5393	2.96938	1.48814	-1.99536	0.0460036	NA	18.4943	14.7366	17.2455	8.06436	7.37281	2.63119	3.08238	2.67937	40.8783	14.9767	14.7456	101.564	108.225	13.7626	1.48214	-1.49307	2.97522	INTS10	chr8:19701714:+;chr8:19701741:+	chr8_19844214_+
chr8:129039765-129039822:mpeak_187829|chr8_128902873_129113225_PVT1_NR_+|	41.7265	4.35519	1.40277	-3.1047	0.00190473	0.0598061	4.62357	10.7175	3.83234	0	1.05326	0	61.6476	109.854	65.1498	80.6436	84.2607	78.9357	8.10195	1.29584	4.18617	-0.0431692	4.22934	PVT1	chr8:129039823:+	-
chr8:125710280-125710334:mpeak_187420|chr8_125565933_125740748_MTSS1_NM_-|	13.2527	3.37526	1.58731	-2.1264	0.0334697	NA	6.16476	2.67937	5.74851	3.45615	0	1.05248	4.62357	10.7175	19.1617	8.06436	12.6391	84.7243	42.2941	6.41476	1.69448	-1.61147	3.30595	MTSS1	chr8:125710277:-	chr8_124698039_-
chr8:100508041-100508191:mpeak_185238|chr8_100025493_100887645_VPS13B_NM_+|	84.7791	2.51768	1.14494	-2.19897	0.0278802	0.173327	476.228	227.747	100.918	97.9243	45.2901	13.6822	4.62357	6.69843	14.6906	6.9123	8.42607	14.2084	3094.24	531.011	2.35898	-0.183789	2.54277	VPS13B	chr8:100508148:+;chr8:100508184:+	-
chr7:92950312-92950384:mpeak_175030|chr7_92861652_92987628_CCDC132_NM_+|	17.1639	1.90466	0.850753	-2.2388	0.025169	NA	16.9531	13.3969	17.8843	6.9123	3.15978	7.89357	20.0355	10.7175	26.1877	26.4972	29.4912	26.8381	84.7097	21.6907	1.42482	-0.540635	1.96545	CCDC132	chr7:92950369:+	chr7_93321056_+
chr7:6743583-6743643:mpeak_170675|chr7_6732334_6746566_ZNF12_NM_-|	67.7778	1.394	0.698143	-1.99672	0.0458555	0.22563	16.9531	10.7175	12.7745	4.6082	11.5858	6.84109	98.6362	104.496	97.086	141.702	113.752	194.182	13.4719	5.12306	0.812127	-0.582749	1.39488	ZNF12	chr7:6743585:-	chr7_6703962_-
chr7:2614278-2614331:mpeak_170223|chr7_2598605_2649677_IQCE_NM_+|	89.5052	2.11428	0.908816	-2.32641	0.0199968	0.147611	9.24714	4.01906	7.66468	5.76025	1.05326	2.10495	101.719	115.213	165.429	203.913	150.616	307.323	5.47412	1.3475	1.23077	-0.791573	2.02234	IQCE	chr7:2614329:+	chr7_2574693_+
chr7:150820668-150820730:mpeak_179103|chr7_150782917_150840823_AGAP3_NM_+|	479.466	1.31118	0.660164	-1.98615	0.0470172	0.228722	459.275	375.112	399.202	226.954	209.598	135.769	705.865	736.828	394.092	889.383	869.992	351.527	67.1602	27.1127	1.10796	-0.200677	1.30864	AGAP3	chr7:150820725:+	chr7_151123591_+;chr7_151123638_+
chr7:1489127-1489207:mpeak_170102|chr7_1474308_1499109_MICALL2_NM_-|	36.4734	2.43724	0.96363	-2.52923	0.0114313	0.117714	6.16476	6.69843	13.4132	1.15205	2.10652	1.05248	73.9771	83.0606	69.6209	65.6669	64.2488	50.5189	11.5929	2.38926	2.60766	0.329045	2.27861	MICALL2	chr7:1489153:-	chr7_1449507_-
chr7:132765677-132765743:mpeak_177818|chr7_132470421_132766828_CHCHD3_NM_-|	37.7002	2.71777	1.24867	-2.17653	0.0295153	0.178314	20.0355	12.0572	13.4132	3.45615	5.26629	1.05248	30.8238	24.1144	114.332	48.3861	25.2782	154.188	26.8836	4.29003	2.21889	-0.428774	2.64767	CHCHD3	chr7:132765687:-	-
chr7:106840584-106840781:mpeak_176384|chr7_106809405_106841858_HBP1_NM_+|	47.9287	2.53929	1.2772	-1.98818	0.0467923	0.228153	13.8707	16.0762	19.1617	11.5205	3.15978	0	43.1533	42.87	109.86	63.3628	54.7695	197.339	25.0703	6.98016	1.7421	-0.687512	2.42961	HBP1	chr7:106840776:+	chr7_107200330_+
chr6:96600365-96600431:mpeak_165164|chr6_96463844_96651023_FUT9_NM_+|	11.2698	3.09439	1.28358	-2.41075	0.0159197	NA	1.54119	8.03812	9.58085	4.6082	0	2.10495	6.16476	6.69843	15.3294	19.5849	22.1184	39.4679	67.9618	12.4056	1.51305	-1.52565	3.0387	FUT9	chr6:96600418:+	-
chr6:90374103-90374373:mpeak_165030|chr6_90353912_90529513_MDN1_NM_-|	58.5207	1.85086	0.896725	-2.06402	0.0390155	0.207271	103.26	60.2859	36.4072	65.6669	66.3553	41.0466	32.365	13.3969	33.8523	56.4505	44.2369	148.925	251.152	69.3349	0.208315	-1.64859	1.85691	MDN1	chr6:90374101:-;chr6:90374206:-	-
chr6:56965250-56965372:mpeak_163501|chr6_56954807_57033220_ZNF451_NM_+|	27.2432	4.11452	1.48123	-2.77778	0.00547319	0.0869818	0	0	14.6906	1.15205	1.05326	1.05248	24.659	18.7556	27.4651	69.123	60.0357	108.931	62.1784	1.3683	2.17293	-1.74806	3.921	ZNF451	chr6:56965369:+	chr11_75405644_+;chr11_75405694_+;chr11_75405729_+;chr11_75405767_+;chr11_75405922_+;chr11_75405947_+;chr11_75406016_+;chr11_75406067_+;chr11_75406091_+;chr11_75406146_+;chr11_75406260_+;chr11_75406280_+
chr6:32154746-32154832:mpeak_161462|chr6_32154251_32157963_PBX2_NM_-|	76.3936	5.13858	1.10864	-4.63503	3.56889e-06	0.00629254	12.3295	8.03812	10.8583	1.15205	3.15978	0	53.9416	29.4731	91.9762	200.457	200.119	305.218	17.8036	0.916378	2.85637	-2.00867	4.86505	PBX2	chr6:32154750:-	-
chr6:30635794-30635859:mpeak_161164|chr6_30621147_30640830_DHX16_NM_-|	35.7528	2.61187	1.33229	-1.96044	0.0499448	0.236879	1.54119	1.33969	8.30341	2.3041	1.05326	0.526238	32.365	30.8128	90.6987	67.971	55.8227	136.296	7.26835	1.49318	1.52601	-0.757234	2.28324	DHX16	chr6:30635799:-	chr6_30668026_-
chr6:136950215-136950278:mpeak_167484|chr6_136878956_137113656_MAP3K5_NM_-|	79.7757	1.87537	0.713286	-2.62919	0.00855879	0.10483	18.4943	52.2478	24.9102	8.06436	16.8521	13.6822	132.542	92.4384	104.751	129.03	188.533	175.764	29.0092	7.82417	1.30925	-0.581252	1.8905	MAP3K5	chr6:136950220:-	chr6_136629087_-
chr6:136949209-136949322:mpeak_167483|chr6_136878956_137113656_MAP3K5_NM_-|	76.6253	1.24194	0.615038	-2.01929	0.0434576	0.219445	20.0355	14.7366	23.6328	13.8246	12.6391	11.5772	132.542	92.4384	104.751	129.03	188.533	175.764	17.7128	7.71111	0.618533	-0.581252	1.19979	MAP3K5	chr6:136949194:-	chr6_136628059_-
chr6:112397474-112397530:mpeak_166188|chr6_112392773_112408751_TUBE1_NM_-|	4.06184	5.26074	2.14286	-2.45502	0.0140878	NA	9.24714	2.67937	10.2196	4.6082	0	4.2099	0	0	0.638724	3.45615	1.05326	12.6297	1155.75	77.1752	1.32851	-4.74596	6.07447	TUBE1	chr6:112397479:-	chr6_112076277_-
chr5:68608640-68608841:mpeak_151132|chr5_68578861_68628620_CCDC125_NM_-|	175.297	1.38935	0.599776	-2.31644	0.0205342	0.149533	394.545	329.563	313.613	195.849	204.332	86.303	110.966	73.6828	76.6468	99.0764	104.273	114.72	397.145	152.949	1.09295	-0.283658	1.37661	CCDC125	chr5:68608655:-;chr5:68608783:-	chr5_69312829_-;chr5_69312957_-;chr5_69312990_-
chr5:66226731-66226797:mpeak_150878|chr5_65892175_66458974_MAST4_NM_+|	63.9276	2.1937	0.678493	-3.2332	0.00122413	0.0515937	36.9886	25.454	30.02	9.21641	16.8521	16.8396	36.9886	76.3621	84.9502	142.854	163.255	127.35	46.6274	9.89901	1.10762	-1.1282	2.23582	MAST4	chr5:66226789:+	chr18_13731548_+
chr5:179996809-179996928:mpeak_158795|chr5_179921398_180000987_CNOT6_NM_+|	163.736	1.96506	0.638452	-3.07785	0.00208503	0.0617762	18.4943	20.0953	19.1617	3.45615	3.15978	5.78862	332.897	357.696	308.503	331.791	259.102	304.692	5.78035	1.38508	2.21898	0.157796	2.06119	CNOT6	chr5:179996926:+	-
chr5:179680496-179680559:mpeak_158743|chr5_179663531_179719071_MAPK9_NM_-|	78.4187	4.00872	1.45836	-2.74879	0.00598158	0.0902424	6.16476	9.37781	7.66468	1.15205	1.05326	0	61.6476	80.3812	271.458	122.117	86.3672	293.641	5.61258	0.658792	3.39552	-0.280208	3.67573	MAPK9	chr5:179680501:-	-
chr5:141314783-141314909:mpeak_156576|chr5_141303384_141318085_KIAA0141_NM_+|	73.2487	1.28943	0.651425	-1.9794	0.0477707	0.230831	40.0709	30.8128	35.1298	23.041	16.8521	7.36733	134.084	117.892	102.834	125.574	133.764	111.562	29.8789	12.7421	1.16554	-0.0639812	1.22952	KIAA0141	chr5:141314910:+	-
chr5:126388187-126388295:mpeak_154750|chr5_126383607_126409184_C5orf63_NM_-|	18.9907	2.38357	0.958091	-2.48783	0.0128524	NA	9.24714	12.0572	17.8843	3.45615	6.31955	12.6297	6.16476	16.0762	17.8843	34.5615	56.876	34.7317	97.6656	17.7582	0.806586	-1.65278	2.45936	C5orf63	chr5:126388192:-;chr5:126388217:-;chr5:126388244:-	-
chr4:88961488-88961571:mpeak_142502|chr4_88928798_88996609_PKD2_NM_+|	37.5863	5.4206	1.56538	-3.46279	0.000534603	0.0397098	4.62357	22.7747	1.91617	0	1.05326	0	52.4005	72.3431	49.8204	70.2751	88.4737	87.3555	16.7929	1.28392	4.79868	-0.495514	5.29419	PKD2	chr4:88961568:+	-
chr4:7050726-7050800:mpeak_138645|chr4_7045155_7055788_TADA2B_NM_+|	72.7121	1.71949	0.721533	-2.3831	0.0171673	0.139346	24.659	24.1144	15.3294	9.21641	6.31955	2.63119	146.413	112.534	161.597	124.421	111.645	133.664	15.2428	4.91361	1.81905	0.185779	1.63328	TADA2B	chr4:7050801:+	chr4_7049073_+
chr4:60106-60156:mpeak_137769|chr4_53178_86036_ZNF595_NM_+|	8.16447	3.18236	1.28118	-2.48392	0.0129945	NA	3.08238	5.35875	2.55489	4.6082	3.15978	5.26238	0	4.01906	1.91617	19.5849	17.9054	30.5218	123.511	19.1589	-0.244895	-3.51841	3.27352	ZNF595	chr4:60161:+	chr4_60264_+
chr4:20284280-20284339:mpeak_139263|chr4_20255186_20620390_SLIT2_NM_+|	3.00627	5.30406	2.68462	-1.97572	0.0481861	NA	4.62357	2.67937	8.94213	0	0	0	1.54119	0	7.66468	1.15205	0	9.47228	117.643	#DIV/0!	Inf	-0.206746	Inf	SLIT2	chr4:20284335:+	chr4_20282708_+
chr4:2008628-2008688:mpeak_138155|chr4_1985230_2010962_NELFA_NM_-|	136.169	2.46324	0.88309	-2.78934	0.00528156	0.0858724	16.9531	12.0572	12.1357	2.3041	4.21303	11.051	112.507	125.931	201.837	264.972	261.208	608.857	9.34555	1.5478	1.22779	-1.36627	2.59406	NELFA	chr4:2008637:-	-
chr4:1701112-1701193:mpeak_138056|chr4_1695440_1714468_SLBP_NM_-|	42.4773	4.0533	1.465	-2.76677	0.00566153	0.0882146	10.7883	1.33969	9.58085	0	0	3.15743	12.3295	36.1715	71.537	86.4038	53.7162	224.704	18.085	2.5964	2.78146	-1.60371	4.38517	SLBP	chr4:1701114:-	-
chr4:147435051-147435107:mpeak_145894|chr4_147177672_147443123_SLC10A7_NM_-|	12.2722	4.09258	1.53981	-2.65785	0.00786407	NA	9.24714	5.35875	3.83234	0	3.15978	0	15.4119	2.67937	16.6068	17.2808	22.1184	51.5713	53.139	10.4202	2.54481	-1.39054	3.93535	SLC10A7	chr4:147435049:-	chr4_146513899_-
chr4:103187694-103187844:mpeak_143465|chr4_103174587_103266655_SLC39A8_NM_-|	9.9133	4.48583	2.08411	-2.15239	0.0313663	NA	24.659	12.0572	26.8264	13.8246	26.3315	6.31486	0	0	0	0	0	8.94605	#DIV/0!	173.153	0.451396	-Inf	Inf	SLC39A8	chr4:103187699:-	chr4_102266522_-
chr4:103184012-103184361:mpeak_143462|chr4_103174587_103266655_SLC39A8_NM_-|	43.4998	4.74826	1.81656	-2.61388	0.00895214	0.106587	95.5538	65.6446	154.571	59.9066	36.8641	100.511	0	0	0	0	0	8.94605	#DIV/0!	735.081	0.678611	-Inf	Inf	SLC39A8	chr4:103184012:-;chr4:103184152:-	chr4_102262855_-;chr4_102262987_-
chr4:103176901-103176971:mpeak_143457|chr4_103174587_103266655_SLC39A8_NM_-|	19.4285	5.05659	1.82767	-2.76668	0.00566298	NA	66.2712	36.1715	46.6268	28.8013	21.0652	25.2594	0	0	0	0	0	8.94605	#DIV/0!	279.922	0.988604	-Inf	Inf	SLC39A8	chr4:103176916:-	chr4_102255762_-
chr3:93783150-93783402:mpeak_130027|chr3_93781854_93845054_NSUN3_NM_+|	20.626	4.53278	1.26762	-3.57582	0.000349129	NA	26.2002	5.35875	5.10979	0	2.10652	1.05248	26.2002	14.7366	25.5489	56.4505	32.651	52.0976	55.1528	3.35589	3.53701	-1.08661	4.62363	NSUN3	chr3:93783247:+	chr3_94064402_+
chr3:37210795-37210847:mpeak_126654|chr3_37095452_37217851_LRRFIP2_NM_-|	56.0429	3.56957	1.39911	-2.55131	0.010732	0.114682	4.62357	1.33969	8.94213	1.15205	1.05326	0	124.836	49.5684	114.332	101.38	85.314	179.973	5.16228	0.902169	2.75678	-0.344721	3.1015	LRRFIP2	chr3:37210791:-	chr3_37169304_-
chr3:31863611-31863673:mpeak_126253|chr3_31703608_32023342_OSBPL10_NM_-|	46.7533	1.97335	0.990665	-1.99194	0.0463773	0.226931	16.9531	9.37781	38.9621	6.9123	9.47933	3.15743	80.1419	30.8128	114.97	76.0354	70.5683	103.669	28.9003	7.81111	1.73983	-0.147657	1.88749	OSBPL10	chr3:31863620:-	chr3_31822129_-
chr3:25640933-25641055:mpeak_125954|chr3_25639968_25705863_TOP2B_NM_-|	194.827	2.67782	1.04777	-2.55574	0.0105962	0.114305	35.4474	33.4922	21.7166	14.9767	8.42607	1.05248	197.272	170.14	471.378	283.404	334.936	765.676	10.808	1.76697	1.89026	-0.722479	2.61274	TOP2B	chr3:25640926:-	chr3_25599428_-
chr3:195966418-195966624:mpeak_137401|chr3_195965765_196014584_PCYT1A_NM_-|	162.515	1.75839	0.706994	-2.48714	0.0128776	0.123473	602.605	313.487	331.498	285.709	174.841	151.557	13.8707	8.03812	12.1357	19.5849	16.8521	19.997	3664.58	1084.64	1.02729	-0.729141	1.75643	PCYT1A	chr3:195966418:-	-
chr3:170077327-170077695:mpeak_135612|chr3_170075472_170110046_SKIL_NM_+|	147.685	1.29615	0.652718	-1.98577	0.0470583	0.228817	41.6121	62.9653	64.5111	52.9943	50.5564	52.6238	127.919	120.572	195.449	229.258	249.622	524.133	38.0881	15.5705	0.114619	-1.1759	1.29052	SKIL	chr3:170077695:+	chr3_170359906_+
chr3:169201280-169201803:mpeak_135440|chr3_168802831_169381563_MECOM_NM_-|	4439.94	2.42101	0.795004	-3.04529	0.00232459	0.0636913	15005	10996.1	9412.23	7026.36	6012	4730.35	3.08238	10.7175	12.1357	13.8246	15.7989	41.5728	136543	24957.4	0.994956	-1.45687	2.45182	MECOM	chr3:169201402:-;chr3:169201586:-	-
chr3:141131936-141132022:mpeak_133409|chr3_141043054_141161230_ZBTB38_NM_+|	54.0739	2.05749	0.951547	-2.16226	0.0305983	0.18165	26.2002	28.1334	7.02596	6.9123	9.47933	1.57871	83.2243	83.0606	95.1698	130.182	70.5683	107.353	23.4685	5.83258	1.77167	-0.23685	2.00852	ZBTB38	chr3:141132022:+	chr3_141413179_+
chr3:113329949-113330071:mpeak_130981|chr3_113251217_113346492_SIDT1_NM_+|	57.0067	2.36145	1.10009	-2.14659	0.031826	0.185181	7.70595	8.03812	2.55489	0	0	2.10495	107.883	95.1177	142.435	107.141	104.273	106.826	5.29735	1.98431	3.1199	0.118306	3.0016	SIDT1	chr3:113330064:+	chr3_113611215_+
chr22:46892825-46892885:mpeak_123992|chr22_46759084_46933067_CELSR1_NM_-|	16.7	3.00419	1.20423	-2.49469	0.0126066	NA	7.70595	25.454	33.2136	8.06436	3.15978	13.156	4.62357	2.67937	19.1617	18.4328	29.4912	35.2579	250.801	29.3093	1.44491	-1.6522	3.09711	CELSR1	chr22:46892833:-	chr22_46496937_-;chr22_46496973_-
chr22:27118082-27118139:mpeak_122101|chr22_27068805_27175846_MIATNB_NR_+|	20.1717	3.57815	1.37341	-2.60531	0.00917911	NA	66.2712	34.8319	51.7366	21.889	18.9587	15.2609	1.54119	1.33969	3.19362	2.3041	1.05326	23.6807	2516.09	207.517	1.44573	-2.15416	3.59988	MIATNB	chr22:27118135:+	chr22_26722125_+;chr22_26722170_+
chr22:19898046-19898175:mpeak_121505|chr22_19863330_19929515_TXNRD2_NM_-mpeak_121505|chr22_19863330_19929515_TXNRD2_NM_-||	36.4791	2.09752	1.04921	-1.99914	0.0455932	0.225041	12.3295	10.7175	8.30341	2.3041	3.15978	0	58.5652	73.6828	114.332	56.4505	33.7043	64.201	12.7141	5.30969	2.52049	0.675793	1.84469	TXNRD2	chr22:19898118:-	chr22_19910595_-
chr21:47976693-47976752:mpeak_121140|chr21_47878861_47987282_DIP2A_NM_+|	67.0194	2.2162	1.09721	-2.01984	0.0433999	0.219372	12.3295	5.35875	12.1357	5.76025	6.31955	0	67.8124	140.667	76.0081	102.533	136.924	238.386	10.4834	3.79199	1.30388	-0.748168	2.05205	DIP2A	chr21:47976744:+	chr21_46556830_+
chr21:43427465-43428045:mpeak_120564|chr21_43414217_43430496_ZBTB21_NM_-|	53.0302	2.37984	0.85727	-2.77607	0.00550198	0.087263	70.8947	109.854	93.2536	34.5615	16.8521	17.8921	43.1533	36.1715	48.543	35.7136	24.2249	105.248	214.286	41.9562	1.98314	-0.369439	2.35258	ZBTB21	chr21:43427914:-	chr2_111429300_-
chr21:43369779-43369840:mpeak_120543|chr21_43309453_43373999_C2CD2_NM_-|	16.9472	2.50568	1.12572	-2.22584	0.026025	NA	7.70595	5.35875	11.497	6.9123	4.21303	0	13.8707	20.0953	17.8843	36.8656	37.9173	41.0466	47.3705	14.4074	1.14256	-1.15958	2.30214	C2CD2	chr21:43369789:-	chr21_41949680_-
chr21:34900681-34900742:mpeak_119807|chr21_34876622_34915198_GART_NM_-|	53.6406	4.54322	1.71345	-2.6515	0.00801344	0.101566	1.54119	0	8.94213	1.15205	0	0	46.2357	38.8509	137.964	116.357	74.7814	217.863	7.04995	0.845023	3.18582	-0.874732	4.06055	GART	chr21:34900678:-	-
chr20:62224545-62224669:mpeak_118778|chr20_62222082_62258381_GMEB2_NM_-|	77.321	2.03911	0.825065	-2.47145	0.0134567	0.125702	6.16476	9.37781	8.30341	9.21641	6.31955	4.73614	73.9771	42.87	86.2277	190.088	156.936	333.635	11.7425	2.97831	0.23425	-1.74492	1.97917	GMEB2	chr20:62224567:-;chr20:62224598:-	chr20_63593225_-
chr20:30960299-30960373:mpeak_115476|chr20_30946146_31022234_ASXL1_NM_+|	38.7438	1.82992	0.919141	-1.9909	0.0464921	0.227283	1.54119	10.7175	19.1617	6.9123	7.37281	8.94605	33.9062	52.2478	31.9362	73.7313	85.314	133.138	26.6071	7.95088	0.43564	-1.30699	1.74263	ASXL1	chr20:30960356:+	chr20_32372570_+
chr2:99444828-99444883:mpeak_104440|chr2_99411134_99552684_KIAA1211L_NM_-|	11.4357	6.26252	1.70177	-3.68001	0.000233224	NA	9.24714	5.35875	4.47107	0	0	0	12.3295	2.67937	24.2715	17.2808	27.3847	34.2055	48.5661	#DIV/0!	Inf	-1.00569	Inf	KIAA1211L	chr2:99444830:-	chr2_98828370_-
chr2:97527936-97528074:mpeak_104232|chr2_97527192_97535735_SEMA4C_NM_-|	86.7818	2.51262	0.954563	-2.63222	0.00848287	0.10439	6.16476	10.7175	15.3294	1.15205	7.37281	5.26238	55.4828	99.1368	136.048	157.831	164.308	382.575	11.0819	1.95643	1.22425	-1.27767	2.50191	SEMA4C	chr2:97528019:-	chr2_96862283_-
chr2:86671013-86671067:mpeak_103670|chr2_86668270_86719161_KDM3A_NM_+|	24.3792	5.4919	1.87348	-2.93139	0.00337454	0.0723634	3.08238	5.35875	10.2196	1.15205	0	0	7.70595	6.69843	70.2596	26.4972	28.438	133.138	22.0409	1.83766	4.01773	-1.15148	5.1692	KDM3A	chr2:86671065:+	-
chr2:208395477-208395552:mpeak_111466|chr2_208394615_208461637_CREB1_NM_+|	151.186	1.745	0.710051	-2.45757	0.013988	0.128009	98.6362	108.515	53.0141	33.4095	67.4086	19.4708	221.931	168.801	173.733	283.404	273.847	312.059	46.0905	13.8373	1.11292	-0.622989	1.73591	CREB1	chr2:208395546:+	chr2_207530753_+;chr2_207530792_+;chr2_207530820_+
chr2:204055936-204056128:mpeak_111157|chr2_203879601_204081975_NBEAL1_NM_+|	308.014	4.1641	0.939533	-4.43209	9.33226e-06	0.010047	903.137	649.748	846.947	491.926	405.505	348.896	3.08238	0	1.91617	9.21641	11.5858	24.207	32007	2769.05	0.945252	-3.17064	4.11589	NBEAL1	chr2:204055943:+;chr2:204056018:+;chr2:204056058:+	chr6_57100571_+
chr2:201850755-201850838:mpeak_110859|chr2_201846594_201936392_FAM126B_NM_-|	66.6586	2.16599	1.05741	-2.0484	0.0405213	0.21162	3.08238	6.69843	8.30341	3.45615	3.15978	0	66.2712	160.762	109.222	133.638	124.285	181.026	5.37812	2.26083	1.45072	-0.384494	1.83521	FAM126B	chr2:201850754:-	chr2_200986017_-
chr2:191845338-191845399:mpeak_110310|chr2_191835443_191878976_STAT1_NM_-|	168.091	1.96772	0.888949	-2.21354	0.0268604	0.169679	33.9062	16.0762	22.994	4.6082	9.47933	5.78862	289.744	175.499	466.907	255.755	175.894	560.444	7.82884	2.00346	1.87639	-0.0899139	1.96631	STAT1	chr2:191845345:-	-
chr2:160468406-160468457:mpeak_108171|chr2_160176929_160473112_BAZ2B_NM_-|	39.659	1.44588	0.732317	-1.97439	0.0483375	0.232508	6.16476	5.35875	7.66468	5.76025	6.31955	7.89357	38.5297	34.8319	40.8783	95.6202	105.326	121.561	16.7964	6.19316	-0.0578597	-1.49726	1.4394	BAZ2B	chr2:160468437:-	-
chr2:136505826-136505940:mpeak_106599|chr2_136499188_136540318_UBXN4_NM_+|	88.6105	2.60733	0.966011	-2.69907	0.00695335	0.0959551	27.7414	13.3969	12.1357	3.45615	5.26629	2.10495	129.46	87.0796	236.328	122.117	124.285	299.956	11.7637	1.98174	2.29875	-0.270757	2.5695	UBXN4	chr2:136505942:+	-
chr2:11691850-11691908:mpeak_98103|chr2_11674241_11780416_GREB1_NM_+|	128.831	2.49258	1.15708	-2.15419	0.031225	0.183279	29.2826	2.67937	7.02596	5.76025	0	3.68367	245.049	93.7781	281.038	313.358	256.995	307.323	6.28974	1.61402	2.04557	-0.501733	2.5473	GREB1	chr2:11691933:+	chr2_11551774_+
chr2:113057421-113057655:mpeak_105333|chr2_113033177_113088581_ZC3H6_NM_+|	43.315	3.86843	1.47836	-2.61671	0.00887815	0.106247	107.883	80.3812	67.7047	120.965	91.6335	33.6792	1.54119	0	0	2.3041	6.31955	7.36733	5536.18	1540.11	0.055682	-3.37514	3.43082	ZC3H6	chr2:113057480:+	chr2_112299889_+;chr2_112300010_+
chr2:112186882-112186964:mpeak_105231|chr2_112125152_112252692_MIR4435-2HG_NR_-|	707.482	3.05671	0.772037	-3.95928	7.51769e-05	0.0211172	2385.76	1586.19	1290.22	1397.44	902.643	828.825	6.16476	6.69843	4.47107	21.889	17.9054	41.5728	30357.1	3845.41	0.750001	-2.23082	2.98082	MIR4435-2HG	chr2:112186891:-	chr6_32186977_-
chr2:111407112-111407175:mpeak_105175|chr2_111395736_111435684_BUB1_NM_-|	19.4231	2.909	1.36494	-2.13122	0.0330706	NA	3.08238	1.33969	9.58085	1.15205	1.05326	1.57871	20.0355	13.3969	39.6009	32.2574	21.0652	88.9342	19.1734	2.65999	1.88773	-0.961874	2.84961	BUB1	chr2:111407123:-	chr2_110649548_-
chr2:10016641-10016734:mpeak_97877|chr2_9983570_10073911_TAF1B_NM_+|	13.8284	3.46147	1.29946	-2.66377	0.00772702	NA	7.70595	5.35875	12.1357	1.15205	4.21303	0	20.0355	6.69843	18.523	19.5849	24.2249	46.3089	55.6831	8.93003	2.23178	-0.99369	3.22547	TAF1B	chr2:10016693:+;chr2:10016728:+	chr2_9876598_+
chr2:100055011-100055175:mpeak_104577|chr2_100017815_100106480_REV1_NM_-|	23.1256	2.60146	0.982228	-2.64853	0.00808419	0.101975	29.2826	32.1525	31.9362	43.7779	51.6097	41.0466	1.54119	1.33969	1.91617	9.21641	12.6391	21.0495	1946.43	317.991	-0.547155	-3.16093	2.61377	REV1	chr2:100055030:-	chr2_99438556_-
chr19:58365413-58365468:mpeak_97235|chr19_58361180_58369943_ZNF587_NM_+|	121.894	2.10665	0.761372	-2.76692	0.00565894	0.0882146	15.4119	20.0953	21.7166	12.6726	2.10652	8.94605	167.99	217.029	113.693	283.404	370.747	228.914	11.4743	2.68668	1.2702	-0.824314	2.09451	ZNF587	chr19:58365467:+	-
chr19:57949769-57949830:mpeak_97130|chr19_57946692_57954658_ZNF749_NM_+|	30.7935	5.50779	1.83322	-3.00443	0.00266082	0.0664409	103.26	68.324	68.9821	42.6259	35.8108	38.4154	0	0	0	0	0	12.1035	#DIV/0!	321.814	1.04175	-Inf	Inf	ZNF749	chr19:57949825:+	chrX_71367328_+
chr19:54662013-54662132:mpeak_96843|chr19_54659678_54663481_LENG1_NM_-|	40.3657	1.89421	0.703765	-2.69153	0.0071125	0.0968117	60.1064	37.5112	42.1558	63.3628	40.0238	27.8906	13.8707	13.3969	19.8004	54.1464	47.3966	64.7273	296.961	78.9541	0.0904729	-1.82071	1.91118	LENG1	chr19:54662033:-	chr2_135748304_+;chr2_135748364_+
chr19:47231919-47232043:mpeak_95577|chr19_47223595_47249720_STRN4_NM_-|	96.3563	3.65747	1.42481	-2.56699	0.0102585	0.113007	13.8707	2.67937	9.58085	3.45615	0	0	95.5538	137.988	245.909	126.726	85.314	435.199	5.45019	1.60195	2.91852	-0.432917	3.35144	STRN4	chr19:47231875:-	-
chr19:46293932-46294009:mpeak_95514|chr19_46287548_46296060_DMWD_NM_-|	61.2681	1.53485	0.591635	-2.59426	0.00947954	0.109361	46.2357	44.2097	53.0141	16.1287	25.2782	12.1035	100.177	91.0987	71.537	99.0764	91.6335	84.7243	54.5861	19.4277	1.42275	-0.0676707	1.49042	DMWD	chr19:46293940:-;chr19:46293965:-	chr19_45790691_-
chr19:46288498-46288567:mpeak_95509|chr19_46287548_46296060_DMWD_NM_-|	47.1088	1.84197	0.923136	-1.99533	0.0460065	0.226093	10.7883	1.33969	8.94213	2.3041	1.05326	2.63119	100.177	91.0987	71.537	99.0764	91.6335	84.7243	8.01716	2.17422	1.81492	-0.0676707	1.88259	DMWD	chr19:46288495:-	chr19_45785256_-
chr19:44677858-44677973:mpeak_95280|chr19_44669214_44679650_ZNF226_NM_+|	18.728	2.33071	1.05938	-2.20007	0.0278018	NA	23.1178	28.1334	24.9102	18.4328	27.3847	22.102	0	1.33969	11.497	17.2808	25.2782	25.2594	395.54	100.149	0.165235	-2.4014	2.56664	ZNF226	chr19:44677966:+	chr19_44173787_+;chr19_44173812_+
chr19:37835648-37835704:mpeak_94456|chr19_37825579_37853010_HKR1_NM_+|	16.1021	4.01278	1.46676	-2.73581	0.00622269	NA	9.24714	4.01906	7.02596	1.15205	2.10652	0	3.08238	14.7366	34.4911	24.1931	36.8641	56.3075	38.7921	4.16467	2.63861	-1.16584	3.80445	HKR1	chr19:37835706:+	chr19_37344802_+
chr19:34243566-34243718:mpeak_93995|chr19_34112860_34262861_CHST8_NM_+|	8.72114	3.27843	1.60315	-2.04499	0.0408554	NA	3.08238	8.03812	8.94213	1.15205	0	0	21.5767	21.435	14.6906	11.5205	10.5326	3.68367	34.7692	13.4289	4.12223	1.1648	2.95744	CHST8	chr19:34243618:+;chr19:34243720:+	chr19_33752711_+;chr19_33752813_+
chr19:337236-337297:mpeak_90968|chr19_306711_344791_MIER2_NM_-|	16.5854	3.82222	1.06528	-3.588	0.000333224	NA	16.9531	4.01906	21.7166	6.9123	4.21303	8.94605	4.62357	2.67937	9.58085	41.4738	32.651	45.2565	252.839	16.8128	1.08872	-2.82187	3.91058	MIER2	chr19:337237:-	chr19_337247_-
chr19:24248595-24248743:mpeak_93721|chr19_24216206_24309055_ZNF254_NM_+|	9.61409	3.64691	1.33537	-2.73101	0.00631409	NA	9.24714	4.01906	9.58085	2.3041	2.10652	0	16.9531	8.03812	5.10979	19.5849	13.6924	24.7332	75.9013	11.4047	2.37296	-0.946501	3.31946	ZNF254	chr19:24248647:+	chr19_24065843_+
chr19:24111021-24111078:mpeak_93697|chr19_24097683_24115144_ZNF726_NM_+|	3.81652	3.91431	1.78795	-2.18927	0.0285772	NA	4.62357	2.67937	6.38724	1.15205	1.05326	0	0	5.35875	4.47107	6.9123	6.31955	6.84109	92.848	16.4797	2.63409	-1.03002	3.66411	ZNF726	chr19:24111079:+	chr19_23928276_+
chr19:22260486-22260544:mpeak_93549|chr19_22235265_22270778_ZNF257_NM_+|	10.9659	3.29435	1.31471	-2.50576	0.0122187	NA	7.70595	5.35875	10.8583	6.9123	0	3.15743	1.54119	9.37781	8.30341	29.9533	11.5858	36.8367	124.454	19.272	1.24837	-2.02762	3.27599	ZNF257	chr19:22260541:+	chr19_22077734_+
chr18:77940684-77940792:mpeak_90947|chr18_77918489_78005397_PARD6G_NM_-|	8.52135	4.37046	1.59193	-2.74538	0.00604406	NA	10.7883	14.7366	15.9681	5.76025	2.10652	1.05248	0	0	8.94213	9.21641	8.42607	25.2594	154.672	20.7899	2.21787	-2.26235	4.48022	PARD6G	chr18:77940739:-	chr18_80182784_-;chr18_80182857_-
chr18:55712646-55712730:mpeak_90306|chr18_55711609_56063398_NEDD4L_NM_+|	36.5424	1.81971	0.788641	-2.30741	0.0210322	0.150887	23.1178	12.0572	11.497	8.06436	4.21303	4.2099	44.6945	60.2859	61.9562	72.5792	86.3672	49.4664	27.958	7.91088	1.5012	-0.320144	1.82135	NEDD4L	chr18:55712703:+;chr18:55712732:+	chr18_58045482_+
chr18:2582793-2582855:mpeak_87712|chr18_2571509_2616435_NDC80_NM_+|	19.1295	1.95874	0.993413	-1.97172	0.0486411	NA	7.70595	4.01906	15.3294	12.6726	4.21303	16.3134	6.16476	12.0572	11.497	43.7779	37.9173	57.8862	91.034	23.7847	-0.295277	-2.23165	1.93637	NDC80	chr18:2582850:+	chr18_2582845_+
chr18:12698942-12698997:mpeak_88275|chr18_12662168_12702776_CEP76_NR_-mpeak_88275|chr18_12673502_12702776_CEP76_NM_-||	6.92934	3.8568	1.81529	-2.12462	0.0336186	NA	4.62357	4.01906	16.6068	3.45615	7.37281	6.31486	0	0	3.19362	2.3041	4.21303	31.048	263.541	45.6375	0.558563	-3.55613	4.1147	CEP76	chr18:12698940:-	-
chr17:80654330-80654418:mpeak_87494|chr17_80616010_80656598_RAB40B_NM_-|	23.1247	2.57964	1.12404	-2.29498	0.0217343	0.153171	20.0355	20.0953	16.6068	2.3041	6.31955	0	30.8238	28.1334	58.1238	21.889	24.2249	48.9401	48.4601	13.6086	2.71793	0.300688	2.41725	RAB40B	chr17:80654288:-;chr17:80654333:-	chr17_82696459_-
chr17:79262428-79262478:mpeak_87218|chr17_79220473_79269139_SLC38A10_NM_-|	68.4059	2.86154	1.3317	-2.14878	0.0316517	0.184854	15.4119	1.33969	2.55489	3.45615	0	0	129.46	116.553	133.493	117.509	114.805	186.288	5.08727	2.47692	2.48185	-0.141459	2.62331	SLC38A10	chr17:79262449:-	-
chr17:79223855-79224044:mpeak_87206|chr17_79220473_79269139_SLC38A10_NM_-|	76.7748	1.40025	0.63996	-2.18804	0.028667	0.175599	27.7414	25.454	32.5749	12.6726	16.8521	7.89357	129.46	116.553	133.493	117.509	114.805	186.288	22.6005	8.93885	1.19674	-0.141459	1.3382	SLC38A10	chr17:79223863:-;chr17:79223939:-;chr17:79223990:-	chr17_81250060_-;chr17_81250139_-;chr17_81250192_-
chr17:77986846-77987005:mpeak_87035|chr17_77914906_78009657_TBC1D16_NM_-|	223.423	1.83069	0.762442	-2.40109	0.0163465	0.136272	118.672	60.2859	112.415	40.3218	23.1717	8.94605	357.556	419.322	468.184	292.621	302.285	477.298	23.4023	6.75613	2.00802	0.215639	1.79238	TBC1D16	chr17:77986853:-	chr17_80013054_-
chr17:76704278-76704354:mpeak_86938|chr17_76672251_76778424_CYTH1_NM_-|	36.7192	2.47678	0.932545	-2.65594	0.00790878	0.101075	12.3295	21.435	14.6906	10.3685	15.7989	6.84109	12.3295	38.8509	24.9102	59.9066	60.0357	163.134	63.6808	11.6606	0.553815	-1.8954	2.44921	CYTH1	chr17:76704278:-	-
chr17:60558509-60558614:mpeak_85034|chr17_60556385_60689752_TLK2_NM_+|	130.674	2.02156	1.02793	-1.96664	0.0492252	0.235174	16.9531	13.3969	6.38724	6.9123	7.37281	0	200.355	245.163	167.984	266.124	222.238	415.202	5.98812	2.37146	1.36273	-0.558558	1.92129	TLK2	chr17:60558568:+	chr17_62481203_+
chr17:2206303-2206365:mpeak_77744|chr17_1964916_2207069_SMG6_NM_-|	60.9014	1.34363	0.684806	-1.96206	0.049756	0.236408	12.3295	17.4159	17.8843	4.6082	5.26629	6.84109	107.883	96.4574	144.99	94.4682	99.0063	123.666	13.6345	5.27072	1.51067	0.139473	1.37119	SMG6	chr17:2206308:-	chr17_2303018_-
chr17:17657932-17658000:mpeak_79504|chr17_17584786_17713283_RAI1_NM_+|	127.223	2.84632	0.782212	-3.63881	0.000273899	0.0319649	10.7883	12.0572	10.8583	5.76025	1.05326	2.10495	146.413	163.442	223.553	274.188	318.084	358.368	6.31858	0.938153	1.91804	-0.83366	2.7517	RAI1	chr17:17657990:+	-
chr17:1724441-1724509:mpeak_77672|chr17_1684733_1733175_SMYD4_NM_-|	75.526	1.90214	0.891702	-2.13315	0.0329123	0.188613	23.1178	10.7175	26.8264	14.9767	7.37281	1.57871	123.295	135.308	90.06	156.679	149.563	166.817	17.3984	5.05818	1.34208	-0.440185	1.78226	SMYD4	chr17:1724451:-	chr17_1821161_-
chr16:89356452-89356512:mpeak_77162|chr16_89353521_89556969_ANKRD11_NR_-mpeak_77162|chr16_89335071_89556969_ANKRD11_NM_-||	48.9356	2.58753	1.06479	-2.43009	0.0150949	0.131974	27.7414	9.37781	17.8843	20.7369	7.37281	27.8906	13.8707	13.3969	37.6847	81.7956	68.4618	261.014	84.6829	13.6164	-0.0259126	-2.66264	2.63673	ANKRD11	chr16:89356459:-	chr16_89290051_-
chr16:88987674-88987738:mpeak_77092|chr16_88943683_89043504_CBFA2T3_NM_-|	295.56	1.31254	0.650458	-2.01787	0.0436045	0.219907	24.659	21.435	28.7426	19.5849	5.26629	19.4708	402.251	430.039	546.747	632.476	623.529	792.514	5.42673	2.16361	0.755722	-0.57092	1.32664	CBFA2T3	chr16:88987679:-	chr16_88921272_-
chr16:69413019-69413095:mpeak_75087|chr16_69390959_69419891_TERF2_NM_-|	93.9506	2.50869	0.981884	-2.55497	0.0106196	0.114305	20.0355	14.7366	32.5749	10.3685	14.7456	2.10495	84.7654	65.6446	174.372	202.761	147.456	357.842	20.7361	3.84418	1.307	-1.1244	2.4314	TERF2	chr16:69413037:-	chr16_69379116_-
chr16:69404235-69404364:mpeak_75086|chr16_69390959_69419891_TERF2_NM_-|	97.2562	2.05111	0.825926	-2.4834	0.0130133	0.123874	26.2002	44.2097	17.8843	13.8246	18.9587	13.156	84.7654	65.6446	174.372	202.761	147.456	357.842	27.1857	6.48805	0.942592	-1.1244	2.06699	TERF2	chr16:69404237:-;chr16:69404289:-	chr16_69370338_-;chr16_69370376_-
chr16:56974141-56974213:mpeak_74304|chr16_56966001_56977037_HERPUD1_NM_+|	66.2417	2.08963	0.968626	-2.15731	0.0309814	0.182693	64.73	21.435	23.6328	26.4972	10.5326	16.3134	77.0595	28.1334	99.6409	110.597	80.0477	236.281	53.6033	12.4947	1.04147	-1.05953	2.101	HERPUD1	chr16:56974209:+	chr16_56940295_+
chr16:50368573-50368688:mpeak_74005|chr16_50353177_50402845_BRD7_NM_-|	210.122	1.61029	0.725895	-2.21835	0.0265311	0.168606	329.815	284.014	197.366	253.451	215.918	96.8278	95.5538	88.4193	180.759	223.498	190.64	365.209	222.408	72.6502	0.518742	-1.09543	1.61417	BRD7	chr16:50368621:-	chr16_50334696_-
chr16:3817629-3817922:mpeak_70707|chr16_3779875_3930121_CREBBP_NM_-|	95.1563	2.03896	0.788875	-2.58464	0.00974812	0.110816	101.719	88.4193	74.7307	65.6669	45.2901	24.207	50.8593	69.6637	119.441	112.901	119.018	269.96	110.378	26.9316	0.970566	-1.06452	2.03509	CREBBP	chr16:3817627:-;chr16:3817673:-	chr16_3767628_-;chr16_3767672_-
chr16:2810419-2810608:mpeak_70454|chr16_2802329_2820858_SRRM2_NM_+|	275.657	1.96411	0.765758	-2.56492	0.01032	0.11322	194.19	168.801	102.834	124.421	182.214	97.8803	104.801	136.648	311.697	470.037	478.179	936.177	84.2137	21.4666	0.203593	-1.76837	1.97196	SRRM2	chr16:2810622:+	chr16_2760620_+
chr16:1524437-1524497:mpeak_70162|chr16_1496718_1525085_CLCN7_NM_-|	50.9703	3.60646	1.36408	-2.64388	0.00819624	0.102654	9.24714	9.37781	1.27745	2.3041	0	0	98.6362	83.0606	91.9762	78.3395	122.178	115.246	7.27233	2.18908	3.11067	-0.206392	3.31706	CLCN7	chr16:1524443:-	-
chr15:67894327-67894377:mpeak_67039|chr15_67835020_68098983_MAP2K5_NM_+|	25.4637	4.53941	1.51219	-3.00189	0.00268309	0.0666637	0	4.01906	7.66468	0	0	0	50.8593	56.2668	53.6528	35.7136	45.2901	52.0976	10.9004	#DIV/0!	Inf	0.272554	Inf	MAP2K5	chr15:67894412:+	-
chr15:50757420-50757592:mpeak_65026|chr15_50716573_50791099_USP8_NM_+|	74.8427	1.95152	0.994148	-1.96301	0.049645	0.236255	12.3295	17.4159	10.2196	11.5205	4.21303	5.26238	49.3181	76.3621	152.016	109.445	103.219	346.791	14.3916	3.75292	0.928629	-1.01051	1.93914	USP8	chr15:50757505:+	chr15_50465305_+
chr15:41818928-41819002:mpeak_64200|chr15_41809889_41836475_RPAP1_NM_-|	30.2788	3.4017	1.22943	-2.7669	0.00565921	0.0882146	9.24714	2.67937	9.58085	1.15205	2.10652	0	47.7769	32.1525	69.6209	49.5382	51.6097	87.8818	14.3814	2.58576	2.72252	-0.337982	3.0605	RPAP1	chr15:41818940:-	-
chr15:40862207-40862267:mpeak_64023|chr15_40861491_40865725_RPUSD2_NM_+|	29.3006	1.94943	0.962515	-2.02535	0.0428317	0.217635	3.08238	5.35875	7.66468	12.6726	5.26629	8.41981	7.70595	14.7366	21.0779	77.1874	55.8227	132.612	37.0075	9.92337	-0.710696	-2.60961	1.89892	RPUSD2	chr15:40862266:+	chr15_40570064_+
chr15:32928327-32928387:mpeak_63573|chr15_32907344_32928457_ARHGAP11A_NM_+|	36.8516	2.40104	1.08904	-2.20474	0.0274726	0.171705	3.08238	5.35875	25.5489	4.6082	14.7456	22.102	24.659	10.7175	15.9681	99.0764	91.6335	124.718	66.1999	13.1427	-0.286461	-2.61903	2.33257	ARHGAP11A	chr15:32928382:+	chr15_32636150_+;chr15_32636180_+
chr14:90487720-90487773:mpeak_61512|chr14_90422245_90509413_TDP1_NM_+|	51.4936	2.05431	1.0103	-2.03337	0.0420149	0.215277	9.24714	1.33969	5.10979	0	2.10652	4.2099	46.2357	60.2859	92.6149	126.726	117.965	152.083	7.88234	2.38792	1.31327	-0.994557	2.30783	TDP1	chr14:90487771:+	-
chr14:51258760-51258818:mpeak_57710|chr14_51190390_51297839_NIN_NM_-|	16.9477	2.47513	1.22395	-2.02224	0.0431515	NA	7.70595	1.33969	8.30341	3.45615	1.05326	1.57871	9.24714	18.7556	35.1298	29.9533	26.3315	60.5174	27.4803	5.21234	1.51079	-0.887611	2.3984	NIN	chr14:51258764:-	chr14_50792047_-
chr14:32559615-32559769:mpeak_56470|chr14_32546494_32623826_ARHGAP5_NM_+|	57.6985	1.68518	0.854532	-1.97205	0.0486044	0.233288	16.9531	13.3969	5.10979	4.6082	7.37281	2.63119	86.3066	85.7399	104.112	101.38	97.9531	166.817	12.8404	3.99076	1.27901	-0.406942	1.68595	ARHGAP5	chr14:32559790:+	-
chr14:31789308-31789383:mpeak_56423|chr14_31762818_31889788_HEATR5A_NM_-|	170.677	1.92251	0.923453	-2.08187	0.0373544	0.2021	650.382	350.998	427.945	220.042	207.492	114.72	7.70595	5.35875	17.8843	16.1287	4.21303	25.2594	4618.33	1189.12	1.39829	-0.55918	1.95747	HEATR5A	chr14:31789323:-	-
chr14:105484207-105484266:mpeak_63085|chr14_105478272_105487425_CDCA4_NM_-|	27.0235	2.7517	1.17805	-2.3358	0.0195014	0.146303	4.62357	4.01906	5.10979	5.76025	8.42607	7.36733	3.08238	4.01906	16.6068	61.0587	37.9173	166.291	58.0069	8.12526	-0.648247	-3.48399	2.83574	CDCA4	chr14:105484210:-;chr14:105484261:-	chr14_105017875_-
chr14:104211812-104211876:mpeak_62977|chr14_104201532_104313927_PPP1R13B_NM_-|	19.3052	2.84123	1.20348	-2.36084	0.0182335	NA	15.4119	5.35875	4.47107	4.6082	1.05326	0	23.1178	30.8128	30.02	29.9533	34.7575	52.0976	30.0673	7.27019	2.15656	-0.476531	2.63309	PPP1R13B	chr14:104211822:-	-
chr14:104160279-104160387:mpeak_62948|chr14_104095524_104167537_KLC1_NM_+|	74.713	1.79907	0.915517	-1.96509	0.0494039	0.235687	18.4943	13.3969	30.6587	17.2808	10.5326	4.2099	86.3066	91.0987	121.357	79.4915	143.243	280.485	20.9363	6.36367	0.965887	-0.752187	1.71807	KLC1	chr14:104160382:+;chr14:104160427:+	chr14_103694044_+;chr14_103694084_+
chr14:104152506-104152575:mpeak_62942|chr14_104095524_104167537_KLC1_NM_+|	315.304	1.33414	0.663251	-2.01152	0.0442706	0.221612	685.83	529.176	571.658	415.89	377.067	402.046	86.3066	91.0987	121.357	79.4915	143.243	280.485	598.021	237.471	0.580254	-0.752187	1.33244	KLC1	chr14:104152562:+	chr14_103686154_+;chr14_103686224_+
chr13:96748198-96748449:mpeak_54652|chr13_96743092_97484743_HS6ST3_NM_+|	46.1837	4.49739	1.402	-3.20783	0.00133739	0.0534568	3.08238	12.0572	7.66468	1.15205	0	0	129.46	62.9653	86.2277	85.2518	70.5683	95.7753	8.18374	1.37369	4.30703	0.147364	4.15966	HS6ST3	chr13:96748270:+	-
chr13:79197852-79197905:mpeak_54281|chr13_79191257_79233314_RNF219_NM_-|	30.8054	3.11435	1.46075	-2.13202	0.033005	0.188905	0	1.33969	8.94213	3.45615	3.15978	0	7.70595	25.454	31.9362	88.7079	61.089	137.874	23.6922	3.44973	0.63608	-2.14378	2.77986	RNF219	chr13:79197854:-	chr13_78623720_-
chr13:41376388-41376449:mpeak_52417|chr13_41363546_41383678_SLC25A15_NM_+|	50.3387	3.13118	1.11867	-2.79903	0.00512563	0.0851686	13.8707	12.0572	15.3294	2.3041	1.05326	1.05248	77.0595	50.9081	169.262	62.2107	52.6629	146.294	13.8806	1.68851	3.22585	0.186599	3.03925	SLC25A15	chr13:41376443:+	-
chr13:115087812-115087921:mpeak_55556|chr13_115079964_115089262_CHAMP1_NM_+|	40.9909	1.90802	0.902044	-2.11521	0.0344118	0.192981	18.4943	17.4159	56.8464	14.9767	9.47933	18.4183	61.6476	49.5684	21.0779	94.4682	58.9825	70.5159	70.1141	19.1432	1.11334	-0.759537	1.87287	CHAMP1	chr13:115087863:+;chr13:115087916:+	chr13_114322387_+;chr13_114322486_+
chr12:98925452-98925624:mpeak_46990|chr12_98909350_98941350_TMPO_NM_+|	295.605	1.54394	0.766501	-2.01427	0.0439809	0.220928	154.119	107.175	268.264	130.182	120.071	196.813	180.319	178.178	383.873	466.581	411.824	949.86	71.3334	24.453	0.2443	-1.30026	1.54456	TMPO	chr12:98925617:+	chr12_98531702_+
chr12:64615476-64615532:mpeak_44470|chr12_64581432_64616076_C12orf66_NM_-|	10.5107	5.02016	1.60841	-3.12119	0.0018012	NA	36.9886	2.67937	9.58085	8.06436	4.21303	4.2099	0	1.33969	3.19362	6.9123	9.47933	39.4679	724.251	29.5157	1.57873	-3.62317	5.2019	C12orf66	chr12:64615479:-	chr12_64221702_-
chr12:64586345-64586504:mpeak_44467|chr12_64581432_64616076_C12orf66_NM_-|	23.258	2.90392	1.21087	-2.39821	0.0164752	0.136878	23.1178	34.8319	32.5749	51.8423	42.1303	34.2055	0	1.33969	3.19362	6.9123	9.47933	39.4679	1331.25	229.465	-0.501768	-3.62317	3.1214	C12orf66	chr12:64586419:-	chr12_64192641_-
chr12:50481901-50481955:mpeak_42551|chr12_50478982_50492729_SMARCD1_NM_+|	66.1606	3.01783	1.23185	-2.44983	0.0142922	0.128856	10.7883	2.67937	4.47107	2.3041	1.05326	0	103.26	85.7399	155.21	127.878	84.2607	216.284	5.21158	1.17549	2.41768	-0.315746	2.73343	SMARCD1	chr12:50481955:+	chr12_50088175_+
chr12:27790200-27790277:mpeak_40727|chr12_27677044_27845728_PPFIBP1_NM_+|	62.7807	1.82367	0.912195	-1.99921	0.0455858	0.225041	9.24714	13.3969	9.58085	6.9123	2.10652	4.2099	49.3181	84.4003	155.21	103.685	115.858	199.444	11.1532	3.15731	1.2845	-0.536195	1.8207	PPFIBP1	chr12:27790291:+	-
chr12:27455043-27455116:mpeak_40673|chr12_27397077_27475260_STK38L_NM_+|	23.9977	2.15538	1.07237	-2.00993	0.0444389	0.221786	7.70595	13.3969	17.2455	8.06436	3.15978	1.05248	23.1178	26.7937	53.6528	43.7779	24.2249	65.7798	37.0285	9.17653	1.64325	-0.369363	2.01262	STK38L	chr12:27455121:+	chr12_27302158_+
chr12:124197915-124197972:mpeak_49951|chr12_124196864_124242473_ATP6V0A2_NM_+|	71.5479	2.51712	1.04325	-2.41277	0.015832	0.13473	12.3295	10.7175	22.3553	6.9123	3.15978	0	124.836	88.4193	172.455	146.31	88.4737	182.605	11.7711	3.61968	2.1724	-0.113871	2.28628	ATP6V0A2	chr12:124197966:+	chr12_123713418_+
chr12:114390846-114390896:mpeak_48654|chr12_114255991_114404176_RBM19_NM_-|	11.2584	3.18188	1.40303	-2.26786	0.0233378	NA	0	4.01906	8.94213	2.3041	2.10652	0	10.7883	14.7366	9.58085	24.1931	23.1717	35.2579	55.3807	8.0074	1.55515	-1.23483	2.78998	RBM19	chr12:114390844:-;chr12:114390891:-	chr12_113953041_-
chr12:114259856-114259929:mpeak_48634|chr12_114255991_114404176_RBM19_NM_-|	68.1997	2.23487	0.753312	-2.96672	0.00300994	0.0686999	191.108	136.648	134.771	124.421	70.5683	43.1515	10.7883	14.7366	9.58085	24.1931	23.1717	35.2579	1317.52	288.227	0.957717	-1.23483	2.19255	RBM19	chr12:114259862:-	chr4_2006911_-;chr4_2006928_-
chr11:75116570-75117305:mpeak_35282|chr11_75110534_75132770_RPS3_NM_+|	8583.76	2.70269	0.710469	-3.80408	0.00014233	0.0248968	25278.6	19546	24256.8	12242.8	11550	10080.6	1.54119	4.01906	5.74851	11.5205	9.47933	17.8921	610866	87096.5	1.02814	-1.78203	2.81017	RPS3	chr11:75116706:+;chr11:75116733:+;chr11:75116774:+;chr11:75116813:+;chr11:75116958:+;chr11:75117049:+;chr11:75117114:+;chr11:75117191:+;chr11:75117298:+;chr11:75117323:+	-
chr11:75115962-75116037:mpeak_35281|chr11_75110534_75132770_RPS3_NM_+|	6.43754	2.59464	1.30504	-1.98816	0.0467938	NA	10.7883	4.01906	3.19362	1.15205	4.21303	3.68367	1.54119	4.01906	5.74851	11.5205	9.47933	17.8921	159.178	23.2664	0.992287	-1.78203	2.77432	RPS3	chr11:75116035:+	-
chr11:73221738-73221863:mpeak_35013|chr11_73117789_73309234_FAM168A_NM_-|	79.8724	2.69741	1.08975	-2.47525	0.0133144	0.124952	33.9062	10.7175	19.8004	9.21641	2.10652	0	121.754	117.892	198.004	149.767	113.752	181.552	14.7204	3.81611	2.50835	-0.0242544	2.53261	FAM168A	chr11:73221777:-	-
chr11:69482358-69482450:mpeak_34532|chr11_69482355_69490165_ORAOV1_NM_-|	82.4191	2.5121	1.16557	-2.15525	0.0311423	0.182962	27.7414	4.01906	8.94213	6.9123	7.37281	1.57871	47.7769	69.6637	176.288	149.767	124.285	364.683	13.8572	2.48364	1.35938	-1.12073	2.48011	ORAOV1	chr11:69482377:-	chr11_69667607_-
chr11:674185-674422:mpeak_29674|chr11_644654_695754_DEAF1_NM_-|	37.2392	2.27081	1.01248	-2.24282	0.0249084	0.163437	6.16476	12.0572	10.2196	3.45615	5.26629	0	44.6945	60.2859	76.0081	70.2751	60.0357	98.4065	15.7145	5.72045	1.70519	-0.337668	2.04286	DEAF1	chr11:674184:-;chr11:674245:-;chr11:674301:-;chr11:674364:-	chr11_674185_-;chr11_674225_-;chr11_674242_-;chr11_674266_-;chr11_674346_-
chr11:65352112-65352164:mpeak_33753|chr11_65343508_65359673_EHBP1L1_NM_+|	42.5345	3.1432	1.54512	-2.03427	0.0419242	0.215025	0	2.67937	8.30341	0	1.05326	0	100.177	93.7781	108.583	42.6259	105.326	47.8877	5.44531	1.61345	3.38231	0.627447	2.75486	EHBP1L1	chr11:65352163:+	chr11_65584691_+
chr11:64536896-64537089:mpeak_33563|chr11_64532990_64546316_SF1_NR_-mpeak_33563|chr11_64533627_64546316_SF1_NM_-||	27.7804	3.21352	1.41364	-2.27323	0.0230124	0.157504	101.719	26.7937	40.8783	72.5792	41.0771	22.6282	0	0	2.55489	4.6082	4.21303	16.3134	2210.01	542.218	0.313732	-3.29834	3.61207	SF1	chr11:64536973:-	-
chr11:22851231-22851298:mpeak_31278|chr11_22844679_22851382_SVIP_NM_-|	83.5958	2.4407	1.19194	-2.04768	0.0405914	0.211813	32.365	13.3969	3.19362	3.45615	4.21303	3.68367	75.5183	99.1368	235.05	127.878	73.7281	331.53	11.9489	2.12945	2.10842	-0.379916	2.48833	SVIP	chr11:22851240:-	chr11_22829701_-;chr11_22829724_-
chr11:22850811-22850861:mpeak_31277|chr11_22844679_22851382_SVIP_NM_-|	81.6406	3.37168	1.54694	-2.17959	0.0292881	0.177546	27.7414	2.67937	1.91617	3.45615	1.05326	0	75.5183	99.1368	235.05	127.878	73.7281	331.53	7.89274	1.26874	2.84217	-0.379916	3.22209	SVIP	chr11:22850802:-	-
chr10:95267872-95267977:mpeak_26446|chr10_95256368_95287706_CEP55_NM_+|	17.8843	4.71925	1.91528	-2.464	0.0137396	NA	1.54119	0	10.8583	1.15205	0	0.526238	7.70595	4.01906	35.7685	23.041	24.2249	105.774	39.1616	1.64495	2.88522	-1.6881	4.57332	CEP55	chr10:95267925:+;chr10:95267972:+	chr10_93508214_+
chr10:80977131-80977330:mpeak_25353|chr10_80828791_81072398_ZMIZ1_NM_+|	128.844	2.44316	0.855279	-2.85657	0.00428244	0.078881	13.8707	41.5303	28.7426	3.45615	20.0119	6.84109	166.449	142.007	181.397	258.059	235.93	447.829	17.1773	3.21816	1.4731	-0.9431	2.4162	ZMIZ1	chr10:80977332:+	-
chr10:38264969-38265057:mpeak_22845|chr10_38242123_38265453_ZNF25_NM_-|	8.7082	2.80181	1.15232	-2.43146	0.0150381	NA	13.8707	8.03812	15.9681	5.76025	8.42607	9.99852	4.62357	2.67937	1.27745	8.06436	8.42607	17.3659	441.436	71.4339	0.647216	-1.98031	2.62752	ZNF25	chr10:38264975:-	chr10_37976039_-
chr10:24834147-24834253:mpeak_21850|chr10_23983674_24834755_KIAA1217_NM_+|	27.6127	1.86246	0.813215	-2.29024	0.0220074	0.154081	20.0355	20.0953	33.2136	18.4328	16.8521	39.4679	7.70595	16.0762	14.6906	36.8656	50.5564	57.3599	190.639	51.6313	-0.027441	-1.91197	1.88453	KIAA1217	chr10:24834201:+;chr10:24834245:+	chr10_24545271_+;chr10_24545315_+;chr10_24545354_+
chr10:15880228-15880286:mpeak_21059|chr10_15821140_15902519_FAM188A_NM_-|	30.557	2.86839	1.22628	-2.33909	0.0193306	0.145947	16.9531	5.35875	3.83234	1.15205	2.10652	0	75.5183	48.2287	65.7885	52.9943	37.9173	56.8337	13.7938	3.30829	3.00418	0.359356	2.64482	FAM188A	chr10:15880227:-	-
chr10:12597015-12597079:mpeak_20761|chr10_12391541_12870767_CAMK1D_NM_+|	42.5714	1.89784	0.965478	-1.9657	0.0493332	0.235548	4.62357	18.7556	8.30341	2.3041	1.05326	2.63119	60.1064	81.7209	129.022	63.3628	63.1955	75.7783	11.6975	2.9597	2.40341	0.420734	1.98268	CAMK1D	chr10:12597070:+	chr10_12555077_+
chr10:118673223-118673301:mpeak_28424|chr10_118646077_118886097_SHTN1_NM_-|	76.7805	3.40499	1.04685	-3.25262	0.00114348	0.0502639	10.7883	4.01906	13.4132	2.3041	2.10652	0	104.801	112.534	173.733	142.854	173.788	181.026	7.2163	1.32939	2.67769	-0.347766	3.02546	SHTN1	chr10:118673247:-	-
chr10:11601509-11601569:mpeak_20625|chr10_11505848_11653788_USP6NL_NM_-|	14.3744	3.08287	1.21472	-2.53793	0.011151	NA	1.54119	5.35875	7.02596	2.3041	1.05326	1.57871	9.24714	17.4159	14.0519	27.6492	21.0652	64.201	34.2034	4.37148	1.49633	-1.47161	2.96795	USP6NL	chr10:11601513:-	chr10_11559515_-
chr10:112359424-112359658:mpeak_27880|chr10_112327448_112363988_SMC3_NM_+|	39.7281	2.3583	1.12316	-2.09971	0.0357542	0.197585	36.9886	18.7556	25.5489	28.8013	44.2369	9.47228	7.70595	12.0572	30.02	42.6259	42.1303	178.395	163.294	31.3548	-0.0214432	-2.40216	2.38072	SMC3	chr10:112359571:+	-
chr10:112356349-112356431:mpeak_27877|chr10_112327448_112363988_SMC3_NM_+|	33.4756	2.19191	1.06639	-2.05544	0.039836	0.209743	10.7883	17.4159	13.4132	21.889	10.5326	14.7347	7.70595	12.0572	30.02	42.6259	42.1303	178.395	83.5975	17.9198	-0.180259	-2.40216	2.2219	SMC3	chr10:112356419:+	chr10_110596659_+
chr10:112343864-112344133:mpeak_27873|chr10_112327448_112363988_SMC3_NM_+|	154.696	2.37416	1.09622	-2.16576	0.0303292	0.180932	368.344	266.598	137.964	406.674	277.007	86.8293	7.70595	12.0572	30.02	42.6259	42.1303	178.395	1552.55	292.802	0.00447942	-2.40216	2.40664	SMC3	chr10:112343915:+	chr10_110584156_+;chr10_110584202_+;chr10_110584360_+;chr10_110584375_+
chr1:875511-875578:mpeak_61|chr1_861120_879287_SAMD11_NM_+|	20.9875	2.47126	1.25572	-1.96801	0.0490674	NA	6.16476	4.01906	10.2196	4.6082	6.31955	0	10.7883	22.7747	26.8264	38.0177	33.7043	88.408	33.7864	10.2365	0.900812	-1.40688	2.30769	SAMD11	chr1:875567:+	chr1_940198_+
chr1:46070593-46070696:mpeak_4416|chr1_46049659_46083732_NASP_NM_+|	158.954	1.2864	0.608021	-2.11571	0.0343695	0.192981	50.8593	40.1906	63.8724	31.1054	20.0119	23.6807	194.19	211.67	368.544	299.533	256.995	346.791	20.0054	8.28035	1.05047	-0.22215	1.27262	NASP	chr1:46070688:+	chr1_45604939_+;chr1_45605013_+
chr1:45101962-45102178:mpeak_4293|chr1_44870959_45116375_RNF220_NM_+|	184.215	1.68505	0.568906	-2.96191	0.00305737	0.0693125	135.625	156.743	104.751	91.012	54.7695	47.8877	249.673	198.274	184.591	405.522	326.51	255.225	62.7818	19.6169	1.03598	-0.642275	1.67825	RNF220	chr1:45102038:+;chr1:45102164:+	chr12_113822058_-
chr1:42307009-42307063:mpeak_3966|chr1_41976937_42384378_HIVEP3_NM_-|	4.60503	6.31563	2.21492	-2.8514	0.00435265	NA	1.54119	0	17.8843	3.45615	5.26629	2.10495	0	0	0	9.21641	5.26629	10.5248	#DIV/0!	43.2967	0.843261	-Inf	Inf	HIVEP3	chr1:42307010:-	chr1_41841340_-
chr1:42007625-42007679:mpeak_3942|chr1_41976937_42384378_HIVEP3_NM_-|	3.69061	4.49465	2.13038	-2.10978	0.0348771	NA	0	1.33969	5.10979	2.3041	2.10652	8.41981	0	0	0	9.21641	5.26629	10.5248	#DIV/0!	51.3064	-0.992316	-Inf	Inf	HIVEP3	chr1:42007624:-	chr1_41541954_-
chr1:33234446-33234505:mpeak_2973|chr1_33207511_33238465_KIAA1522_NM_+|	71.4857	1.67803	0.752351	-2.23038	0.0257221	0.166067	32.365	21.435	12.7745	13.8246	5.26629	6.31486	103.26	97.7971	143.074	134.79	171.681	115.246	19.3457	6.02436	1.38981	-0.293318	1.68313	KIAA1522	chr1:33234497:+	chr1_32768893_+
chr1:28283225-28283281:mpeak_2483|chr1_28261465_28284986_SMPDL3B_NM_+|	25.3663	3.85754	1.63455	-2.36001	0.0182745	0.142429	0	4.01906	8.94213	0	0	0	69.3535	56.2668	70.8983	50.6902	29.4912	14.7347	9.8931	#DIV/0!	Inf	1.04994	Inf	SMPDL3B	chr1:28283277:+	chr1_27956779_+
chr1:24305021-24305137:mpeak_2062|chr1_24294213_24306953_SRSF10_NR_-mpeak_2062|chr1_24297929_24306953_SRSF10_NM_-||	89.9788	1.85478	0.729914	-2.5411	0.0110505	0.116017	12.3295	12.0572	19.1617	4.6082	9.47933	6.84109	144.872	81.7209	150.1	190.088	178.001	270.486	11.5607	3.27739	1.05714	-0.761469	1.81861	SRSF10	chr1:24305069:-	chr1_23978540_-;chr1_23978581_-
chr1:24304163-24304256:mpeak_2059|chr1_24294213_24306953_SRSF10_NR_-mpeak_2059|chr1_24297929_24306953_SRSF10_NM_-||	87.0186	3.515	1.50852	-2.3301	0.0198009	0.147137	23.1178	2.67937	0	0	1.05326	2.10495	144.872	81.7209	150.1	190.088	178.001	270.486	10.2725	0.741857	3.03004	-0.761469	3.79151	SRSF10	chr1:24304175:-	chr1_23977687_-
chr1:202883556-202883715:mpeak_16607|chr1_202861787_202897772_KLHL12_NM_-|	94.6594	3.4084	1.17799	-2.8934	0.00381091	0.0753682	3.08238	8.03812	11.497	1.15205	1.05326	5.26238	32.365	60.2859	137.964	163.591	199.066	512.556	9.80747	0.853243	1.59871	-1.92415	3.52285	KLHL12	chr1:202883556:-;chr1:202883628:-;chr1:202883659:-	-
chr1:20104652-20104703:mpeak_1599|chr1_20009937_20126410_TMCO4_NM_-|	13.0839	4.84924	1.59346	-3.04321	0.00234069	NA	13.8707	1.33969	5.10979	0	0	0	24.659	30.8128	24.9102	24.1931	14.7456	17.3659	25.2795	#DIV/0!	Inf	0.513622	Inf	TMCO4	chr1:20104650:-	chr1_19778159_-
chr1:17931324-17931381:mpeak_1442|chr1_17866329_18023342_ARHGEF10L_NM_+|	48.7269	1.85011	0.76703	-2.41205	0.0158632	0.134829	15.4119	6.69843	14.0519	8.06436	15.7989	11.5772	29.2826	45.5493	38.9621	82.9477	147.456	168.922	31.7787	8.87507	0.0290866	-1.81114	1.84023	ARHGEF10L	chr1:17931376:+	chr1_17604879_+
chr1:162558513-162558671:mpeak_13634|chr1_162531295_162569060_UAP1_NM_+|	47.6303	2.66243	1.34985	-1.97238	0.0485658	0.233235	16.9531	4.01906	5.74851	2.3041	0	4.73614	29.2826	33.4922	124.551	91.012	38.9706	220.494	14.2643	3.01315	1.92426	-0.903767	2.82803	UAP1	chr1:162558605:+	chr1_162588814_+;chr1_162588882_+
chr1:111737028-111737091:mpeak_8659|chr1_111730303_111747160_DENND2D_NM_-|	85.4481	2.0892	1.05797	-1.97472	0.0483005	0.232436	9.24714	0	18.523	3.45615	1.05326	2.63119	194.19	132.629	160.32	165.895	152.723	184.71	8.55099	1.41868	1.95942	-0.047165	2.00658	DENND2D	chr1:111737033:-	chr1_111194411_-
chr1:10009806-10009860:mpeak_793|chr1_10002980_10042358_NMNAT1_NM_+|	33.0054	2.05336	1.02641	-2.00053	0.0454427	0.224784	7.70595	5.35875	6.38724	2.3041	2.10652	0	73.9771	72.3431	67.7047	51.8423	46.3434	59.9911	9.08863	4.18262	2.14086	0.436241	1.70462	NMNAT1	chr1:10009859:+	-
chrX:135962743-135962850:mpeak_201574|chrX_135956611_135962939_RBMX_NR_-mpeak_201574|chrX_135952576_135962939_RBMX_NM_-||	161.916	1.36874	0.672792	-2.03442	0.0419095	0.215015	72.4359	20.0953	37.046	19.5849	12.6391	19.4708	312.862	263.918	283.593	319.118	286.486	295.746	15.0606	5.73526	1.32572	-0.0671254	1.39285	RBMX	-	chrX_136880640_-
chr5:178156720-178156779:mpeak_158492|chr5_178140622_178157703_ZNF354A_NM_-|	32.0891	3.14792	0.992327	-3.17226	0.00151256	0.0560564	21.5767	6.69843	12.7745	10.3685	4.21303	1.57871	29.2826	21.435	26.1877	84.0997	49.5032	117.351	53.3768	6.43951	1.34492	-1.70627	3.05119	ZNF354A	-	chr9_5098333_+
chr9:5095127-5095221:mpeak_189315|chr9_4985244_5126683_JAK2_NM_+|	19.4336	2.77745	1.04759	-2.65127	0.008019	NA	18.4943	6.69843	8.94213	5.76025	1.05326	1.05248	36.9886	20.0953	21.0779	47.2341	35.8108	29.9956	43.6721	6.95856	2.11755	-0.532305	2.64985	JAK2	-	chr9_5095225_+
chr16:2806474-2806619:mpeak_70446|chr16_2802329_2820858_SRRM2_NM_+|	242.346	2.33224	0.814997	-2.86165	0.00421441	0.0783697	120.213	113.873	47.2655	70.2751	76.8879	42.099	104.801	136.648	311.697	470.037	478.179	936.177	50.8639	10.0437	0.57199	-1.76837	2.34036	SRRM2	-	chr9_5092817_+
chr9:2115931-2116058:mpeak_189118|chr9_2015218_2192703_SMARCA2_NM_+|	95.9549	1.34733	0.658023	-2.04754	0.0406047	0.211829	20.0355	16.0762	15.3294	5.76025	5.26629	5.78862	154.119	227.747	205.03	157.831	141.137	197.339	8.76494	3.38806	1.61316	0.241872	1.37129	SMARCA2	-	chr9_2116041_+
chr9:125863833-125863999:mpeak_195308|chr9_125703287_125865369_RABGAP1_NM_+|	449.977	1.26017	0.576632	-2.1854	0.0288597	0.176206	98.6362	68.324	58.1238	43.7779	40.0238	22.102	772.136	711.374	910.181	805.284	764.666	1105.1	9.40322	3.95895	1.08771	-0.160329	1.24804	RABGAP1	-	chr9_123101566_+;chr9_123101671_+
chr8:68066295-68066377:mpeak_182915|chr8_67976602_68107616_CSPP1_NM_+|	10.0417	3.55123	1.3929	-2.54951	0.0107874	NA	23.1178	16.0762	14.6906	11.5205	10.5326	3.68367	1.54119	1.33969	3.19362	6.9123	2.10652	25.7857	887.065	73.9467	1.06605	-2.51844	3.58448	CSPP1	-	chr8_67154136_+
chr7:129257457-129257597:mpeak_177496|chr7_129251542_129394857_NRF1_NM_+mpeak_177496|chr7_129251542_129394857_NRF1_NM_+||	26.6809	4.33625	1.25573	-3.45317	0.000554046	0.0398031	4.62357	17.4159	4.47107	3.45615	3.15978	0	12.3295	29.4731	10.8583	99.0764	86.3672	48.9401	50.342	4.23404	2.00255	-2.15407	4.15662	NRF1	-	chr7_152263020_-
chr7:138972957-138973247:mpeak_178299|chr7_138916230_138982532_UBN2_NM_+|	148.347	1.4937	0.723872	-2.06349	0.0390661	0.207331	16.9531	42.87	34.4911	8.06436	14.7456	5.26238	352.932	338.941	228.663	240.779	292.806	203.654	10.2456	3.80777	1.74832	0.320343	1.42798	UBN2	-	chr7_139288299_+
chr7:102960234-102960314:mpeak_176062|chr7_102953090_102985320_DNAJC2_NM_-|	61.3899	2.96375	1.20742	-2.45461	0.0141036	0.128364	10.7883	5.35875	3.83234	3.45615	1.05326	0	124.836	88.4193	72.1758	236.17	121.125	69.4634	6.99972	1.585	2.1475	-0.580276	2.72778	DNAJC2	-	chr7_103319835_-
chr10:96306143-96306261:mpeak_26529|chr10_96305523_96361284_HELLS_NM_+|	138.007	1.50137	0.543304	-2.76341	0.00572015	0.0884626	73.9771	85.7399	84.3115	40.3218	49.5032	49.9926	154.119	150.045	180.759	248.843	179.054	359.421	50.3232	17.7587	0.803505	-0.699191	1.5027	HELLS	-	chr6_57132023_+
chr6:49415397-49415510:mpeak_163065|chr6_49399569_49431041_MUT_NM_-|	55.1743	1.99769	0.976886	-2.04496	0.040859	0.212333	16.9531	22.7747	22.3553	4.6082	10.5326	2.10495	61.6476	62.9653	159.042	56.4505	82.1542	160.503	21.8868	5.76574	1.84796	-0.0765255	1.92449	MUT	-	chr6_49447685_-
chr5:86658357-86658481:mpeak_152515|chr5_86564069_86686616_RASA1_NM_+|	17.6008	2.26474	1.10563	-2.04836	0.0405247	NA	18.4943	14.7366	23.6328	17.2808	8.42607	19.997	3.08238	2.67937	15.3294	26.4972	13.6924	47.3614	269.609	52.2026	0.315189	-2.05349	2.36868	RASA1	-	chr5_87362664_+
chr5:70363310-70363525:mpeak_151346|chr5_70331623_70363497_GTF2H2_NM_-|	35.3295	2.13613	1.05328	-2.02808	0.0425522	0.216807	70.8947	16.0762	21.0779	47.2341	34.7575	15.2609	13.8707	9.37781	20.4392	39.1697	34.7575	101.038	247.321	55.584	0.151876	-2.00177	2.15364	GTF2H2	-	chr5_71067683_-
chr2:204055718-204055787:mpeak_111156|chr2_203879601_204081975_NBEAL1_NM_+|	267.356	4.45407	0.94315	-4.72255	2.32905e-06	0.00568592	886.184	576.065	754.971	358.288	275.954	306.797	3.08238	0	1.91617	9.21641	11.5858	24.207	29571.5	2090.77	1.23643	-3.17064	4.40707	NBEAL1	-	chr5_66930961_+
chr5:61642910-61643038:mpeak_150510|chr5_61601988_61681310_KIF2A_NM_+|	45.6716	2.65643	1.00852	-2.63398	0.00843909	0.104194	92.4714	81.7209	50.4592	57.6025	36.8641	18.9446	10.7883	9.37781	29.3813	35.7136	23.1717	101.564	453.407	70.6835	0.986126	-1.69523	2.68136	KIF2A	-	chr5_62347196_+
chr5:57754806-57754929:mpeak_150281|chr5_57750601_57755966_PLK2_NM_-|	299.84	1.62381	0.752577	-2.15766	0.0309541	0.182634	198.814	158.083	136.048	638.236	438.156	459.932	27.7414	42.87	75.3694	324.878	289.646	808.302	337.678	107.977	-1.63998	-3.28491	1.64492	PLK2	-	chr5_58459034_-
chr12:132250678-132250860:mpeak_50199|chr12_132195631_132283967_SFSWAP_NM_+|	26.5921	4.12694	1.44815	-2.8498	0.00437471	0.0793826	7.70595	14.7366	7.02596	4.6082	2.10652	0	4.62357	12.0572	44.0719	31.1054	53.7162	137.348	48.5056	4.53351	2.13377	-1.87064	4.00441	SFSWAP	-	chr5_57246296_+
chr16:89383333-89383475:mpeak_77175|chr16_89353521_89556969_ANKRD11_NR_-mpeak_77175|chr16_89335071_89556969_ANKRD11_NM_-||	233.033	3.48665	0.982189	-3.54988	0.000385408	0.0356289	665.794	566.687	260.599	379.025	322.297	125.771	13.8707	13.3969	37.6847	81.7956	68.4618	261.014	2298.74	201.106	0.852171	-2.66264	3.51481	ANKRD11	-	chr5_180253496_-
chr5:179162123-179162201:mpeak_158598|chr5_179159850_179200895_MAML1_NM_+|	73.1753	2.59095	1.18258	-2.19094	0.0284565	0.175058	6.16476	25.454	8.94213	5.76025	5.26629	0	81.6831	79.0415	169.9	110.597	117.965	267.329	12.268	3.33538	1.87911	-0.584826	2.46394	MAML1	-	chr5_179735215_+
chr5:169018011-169018232:mpeak_157657|chr5_169010637_169031063_SPDL1_NM_+|	39.4006	2.85843	1.34334	-2.12786	0.0333486	0.190196	55.4828	45.5493	59.4013	52.9943	37.9173	19.4708	3.08238	0	29.3813	31.1054	29.4912	108.931	329.463	65.1117	0.539464	-2.38462	2.92409	SPDL1	-	chr5_169591123_+
chr5:169010828-169010904:mpeak_157653|chr5_169010637_169031063_SPDL1_NM_+|	788.947	3.18247	1.2998	-2.44844	0.0143477	0.128989	3026.9	1804.56	1162.48	1534.53	1136.47	600.438	3.08238	0	29.3813	31.1054	29.4912	108.931	12309	1929.73	0.873579	-2.38462	3.2582	SPDL1	-	chr5_169583889_+
chr5:14398679-14398863:mpeak_148471|chr5_14143828_14507988_TRIO_NM_+|	55.4111	1.85677	0.895941	-2.07243	0.0382255	0.204628	15.4119	33.4922	14.0519	2.3041	13.6924	4.73614	73.9771	71.0034	120.719	94.4682	76.8879	144.189	23.6945	6.57041	1.60244	-0.248053	1.85049	TRIO	-	chr5_14398653_+
chr4:76837873-76838011:mpeak_141615|chr4_76832506_76862166_NAAA_NM_-|	90.7254	1.98287	0.837249	-2.36832	0.017869	0.141131	260.461	207.651	259.96	127.878	111.645	77.357	9.24714	2.67937	5.10979	4.6082	6.31955	15.7871	4273.66	1186.15	1.20015	-0.649032	1.84918	NAAA	-	chr4_75916696_-;chr4_75916822_-
chr4:68532795-68532857:mpeak_141256|chr4_68484850_68566889_UBA6_NM_-|	71.67	1.75838	0.840049	-2.09319	0.0363324	0.199191	27.7414	22.7747	7.02596	6.9123	8.42607	3.68367	115.589	88.4193	165.429	149.767	133.764	130.507	15.5756	4.59428	1.59694	-0.164429	1.76137	UBA6	-	chr4_67667060_-
chr4:1705261-1705427:mpeak_138057|chr4_1695440_1714468_SLBP_NM_-|	59.5639	2.62479	1.01942	-2.5748	0.0100299	0.111965	61.6476	40.1906	52.3753	41.4738	16.8521	17.3659	12.3295	36.1715	71.537	86.4038	53.7162	224.704	128.47	20.7475	1.02672	-1.60371	2.63043	SLBP	-	chr4_1703599_-;chr4_1703649_-
chr3:61736636-61736748:mpeak_128590|chr3_61547242_62278835_PTPRG_NM_+|	32.4352	3.32523	1.60069	-2.07737	0.0377677	0.203572	58.5652	163.442	40.8783	23.041	53.7162	2.63119	0	1.33969	9.58085	14.9767	2.10652	18.9446	1604.84	220.353	1.72743	-1.72206	3.4495	PTPRG	-	chr3_61751014_+
chr3:61628869-61628949:mpeak_128572|chr3_61547242_62278835_PTPRG_NM_+|	5.70722	6.06754	2.35497	-2.57649	0.00998101	NA	0	14.7366	5.74851	0	1.05326	0	0	1.33969	9.58085	14.9767	2.10652	18.9446	187.583	8.7704	4.28164	-1.72206	6.0037	PTPRG	-	chr3_61643283_+
chr3:33725874-33725958:mpeak_126473|chr3_33540209_33759705_CLASP2_NM_-|	36.6758	2.02997	0.911498	-2.22707	0.0259427	0.166564	40.0709	33.4922	37.6847	19.5849	15.7989	16.8396	47.7769	14.7366	33.2136	28.8013	36.8641	115.246	116.214	28.8668	1.09101	-0.918285	2.00929	CLASP2	-	chr3_33684408_-
chr3:186504288-186504426:mpeak_136830|chr3_186501360_186506913_EIF4A2_NM_+|	146.592	1.82619	0.888522	-2.05531	0.0398487	0.209743	24.659	6.69843	20.4392	16.1287	20.0119	15.7871	107.883	81.7209	175.01	252.299	259.102	779.359	14.2059	4.02304	-0.00364807	-1.82378	1.82013	EIF4A2	-	chr3_186786583_+;chr3_186786615_+
chr3:170108084-170108257:mpeak_135620|chr3_170075472_170110046_SKIL_NM_+|	154.293	1.45234	0.733113	-1.98107	0.0475839	0.230324	95.5538	72.3431	53.6528	77.1874	72.6748	33.153	127.919	120.572	195.449	229.258	249.622	524.133	49.9053	18.2465	0.275666	-1.1759	1.45157	SKIL	-	chr3_170390362_+;chr3_170390376_+
chr12:114395582-114395805:mpeak_48657|chr12_114255991_114404176_RBM19_NM_-|	25.1125	2.33218	0.81028	-2.87823	0.00399907	0.076967	50.8593	40.1906	32.5749	24.1931	26.3315	9.47228	10.7883	14.7366	9.58085	24.1931	23.1717	35.2579	352.15	72.6154	1.04301	-1.23483	2.27784	RBM19	-	chr3_169483809_-
chr3:160665423-160665574:mpeak_135106|chr3_160473995_160786598_PPM1L_NM_+|	56.2946	2.71036	1.14089	-2.37565	0.0175183	0.140115	251.214	115.213	112.415	70.2751	30.5445	22.6282	13.8707	1.33969	12.1357	19.5849	3.15978	23.1545	1751.04	268.955	1.95565	-0.747129	2.70278	PPM1L	-	chr3_160947688_+;chr3_160947784_+;chr3_160947824_+
chr3:160138499-160138701:mpeak_134981|chr3_160117091_160151444_SMC4_NM_+|	104.301	2.16046	0.914645	-2.36207	0.0181732	0.14206	32.365	12.0572	17.2455	19.5849	18.9587	6.31486	43.1533	92.4384	135.409	241.931	188.533	443.619	22.7555	5.13205	0.459138	-1.68947	2.14861	SMC4	-	chr3_160420754_+
chr3:129156665-129156806:mpeak_132385|chr3_129150421_129159022_MBD4_NM_-|	128.47	1.39032	0.700622	-1.9844	0.0472108	0.229348	43.1533	38.8509	16.6068	24.1931	18.9587	18.4183	158.743	146.026	213.334	263.82	198.013	401.52	19.0331	7.13151	0.67952	-0.736712	1.41623	MBD4	-	chr3_129437936_-
chr3:113383154-113383265:mpeak_131005|chr3_113368697_113415493_KIAA2018_NR_-mpeak_131005|chr3_113380272_113415493_KIAA2018_NM_-||	26.6548	1.73492	0.883168	-1.96443	0.0494803	0.235789	32.365	9.37781	17.8843	13.8246	15.7989	8.41981	16.9531	20.0953	33.8523	39.1697	37.9173	74.1996	84.0993	25.1465	0.648325	-1.09341	1.74174	KIAA2018	-	chr3_113664410_-
chr22:28256113-28256193:mpeak_122124|chr22_28249651_28315294_PITPNB_NM_-|	295.717	1.36683	0.652995	-2.09318	0.0363335	0.199191	89.389	87.0796	93.8924	40.3218	68.4618	51.0451	366.803	259.899	608.065	632.476	405.505	845.665	21.8957	8.48507	0.758361	-0.609288	1.36765	PITPNB	-	chr22_27860131_-
chr6:17655607-17655755:mpeak_159990|chr6_17616412_17707065_NUP153_NM_-|	74.3104	3.68213	1.05091	-3.50376	0.000458737	0.0374265	120.213	206.312	61.3175	28.8013	43.1836	10.5248	21.5767	21.435	69.6209	82.9477	49.5032	176.29	344.343	26.7246	2.23283	-1.45477	3.68761	NUP153	-	chr21_42007809_-
chr20:9149558-9149623:mpeak_114457|chr20_9049700_9459567_PLCB4_NM_+|	70.2751	2.00509	0.921443	-2.17603	0.0295532	0.178314	225.014	77.7018	199.282	63.3628	54.7695	64.201	23.1178	5.35875	35.7685	24.1931	22.1184	48.4139	781.378	192.486	1.4611	-0.560165	2.02127	PLCB4	-	chr20_9168966_+
chr2:98429967-98430077:mpeak_104339|chr2_98373846_98612354_TMEM131_NM_-|	56.7072	2.31034	1.04623	-2.20826	0.027226	0.1709	15.4119	21.435	10.2196	5.76025	8.42607	4.73614	32.365	56.2668	116.248	74.8833	64.2488	270.486	22.9728	4.61953	1.3146	-0.999505	2.3141	TMEM131	-	chr2_97813530_-
chr9:5098282-5098348:mpeak_189321|chr9_4985244_5126683_JAK2_NM_+|	42.917	2.63384	0.862647	-3.0532	0.00226411	0.0634458	57.024	40.1906	164.791	20.7369	17.9054	23.1545	36.9886	20.0953	21.0779	47.2341	35.8108	29.9956	335.209	54.6679	2.08399	-0.532305	2.6163	JAK2	-	chr2_86443941_+
chr2:73682282-73682452:mpeak_102959|chr2_73612885_73836694_ALMS1_NM_+|	24.8613	2.09599	1.02549	-2.04389	0.0409642	0.212571	60.1064	46.889	21.7166	24.1931	45.2901	12.6297	4.62357	6.69843	11.497	29.9533	9.47933	25.2594	564.056	126.929	0.648466	-1.50335	2.15182	ALMS1	-	chr2_73455235_+;chr2_73455348_+
chr16:89358092-89358158:mpeak_77164|chr16_89353521_89556969_ANKRD11_NR_-mpeak_77164|chr16_89335071_89556969_ANKRD11_NM_-||	69.6562	3.10686	1.00224	-3.09992	0.00193572	0.0599355	73.9771	107.175	28.1038	52.9943	62.1423	35.2579	13.8707	13.3969	37.6847	81.7956	68.4618	261.014	322.169	36.5682	0.476516	-2.66264	3.13916	ANKRD11	-	chr2_203191275_+;chr2_203191312_+;chr2_203191445_+
chr2:204022420-204022560:mpeak_111154|chr2_203879601_204081975_NBEAL1_NM_+|	12.2617	3.11945	1.44381	-2.16057	0.0307282	NA	27.7414	10.7175	8.94213	14.9767	31.5978	3.15743	3.08238	0	1.91617	9.21641	11.5858	24.207	632.197	110.493	-0.0692513	-3.17064	3.10139	NBEAL1	-	chr2_203157740_+
chr2:203921178-203921238:mpeak_111138|chr2_203879601_204081975_NBEAL1_NM_+|	16.1758	2.64348	1.1066	-2.38884	0.0169018	NA	21.5767	21.435	15.3294	29.9533	35.8108	19.997	3.08238	0	1.91617	9.21641	11.5858	24.207	778.106	190.541	-0.555814	-3.17064	2.61482	NBEAL1	-	chr2_203056506_+
chr2:201462779-201462832:mpeak_110768|chr2_201450730_201535351_AOX1_NM_+|	13.9877	5.85596	2.08189	-2.8128	0.00491119	NA	0	16.0762	7.02596	0	0	0	6.16476	4.01906	55.569	12.6726	25.2782	41.0466	52.7024	#DIV/0!	Inf	-0.264752	Inf	AOX1	-	chr2_200598121_+
chr2:190612386-190612486:mpeak_110132|chr2_190611894_190627924_OSGEPL1_NM_-|	7.74273	3.59892	1.38905	-2.59092	0.00957209	NA	9.24714	18.7556	13.4132	8.06436	9.47933	5.78862	1.54119	0	1.91617	5.76025	3.15978	15.7871	798.604	94.4353	0.827858	-2.83719	3.66504	OSGEPL1	-	chr2_189747673_-
chr2:183888603-183888653:mpeak_109825|chr2_183790546_183903586_NCKAP1_NM_-|	79.833	2.74109	1.24285	-2.20549	0.0274196	0.171573	77.0595	26.7937	25.5489	8.06436	14.7456	12.6297	29.2826	40.1906	208.224	63.3628	75.8346	376.26	46.5983	6.87538	1.86842	-0.892342	2.76077	NCKAP1	-	chr2_183023875_-
chr2:160303288-160303416:mpeak_108145|chr2_160176929_160473112_BAZ2B_NM_-|	48.1194	1.65966	0.821812	-2.01952	0.0434334	0.219408	40.0709	28.1334	7.02596	26.4972	22.1184	16.8396	38.5297	34.8319	40.8783	95.6202	105.326	121.561	65.8529	20.2957	0.200806	-1.49726	1.69807	BAZ2B	-	chr2_159446791_-
chr2:160261355-160261429:mpeak_108132|chr2_160176929_160473112_BAZ2B_NM_-|	56.4462	1.4758	0.718593	-2.05374	0.0400006	0.210287	40.0709	45.5493	33.2136	50.6902	54.7695	16.3134	38.5297	34.8319	40.8783	95.6202	105.326	121.561	104.021	37.7583	-0.0352485	-1.49726	1.46202	BAZ2B	-	chr2_159404848_-
chr2:159857575-159857784:mpeak_108041|chr2_159825145_160086088_TANC1_NM_+|	37.7925	2.35301	1.06349	-2.21255	0.0269288	0.169888	41.6121	24.1144	14.0519	14.9767	12.6391	3.68367	18.4943	37.5112	58.7626	46.082	41.0771	140.506	69.5127	13.748	1.34986	-0.988189	2.33805	TANC1	-	chr2_159001113_+;chr2_159001189_+
chr2:113069382-113069519:mpeak_105334|chr2_113033177_113088581_ZC3H6_NM_+|	5.66911	5.13285	2.00836	-2.55574	0.0105963	NA	18.4943	8.03812	9.58085	8.06436	6.31955	0	1.54119	0	0	2.3041	6.31955	7.36733	781.069	134.925	1.32807	-3.37514	4.70322	ZC3H6	-	chr2_112311870_+
chr2:105709979-105710055:mpeak_104849|chr2_105654482_105716127_MRPS9_NM_+|	123.333	1.48337	0.718393	-2.06485	0.0389375	0.207162	104.801	57.6065	119.441	36.8656	41.0771	25.7857	147.954	104.496	288.703	195.849	142.19	215.231	52.083	18.7482	1.44211	-0.0319474	1.47406	MRPS9	-	chr2_105093557_+
chr1:197068203-197068590:mpeak_15947|chr1_197053556_197115824_ASPM_NM_-|	42.2707	2.20804	0.660845	-3.34123	0.000834068	0.0452861	52.4005	30.8128	44.0719	29.9533	34.7575	35.7842	20.0355	22.7747	17.8843	58.7546	56.876	103.143	209.715	45.9357	0.34094	-1.8498	2.19074	ASPM	-	chr19_57854098_+
chr9:5092763-5092852:mpeak_189310|chr9_4985244_5126683_JAK2_NM_+|	25.5909	2.24509	0.827357	-2.71357	0.00665616	0.0942644	35.4474	21.435	31.2975	16.1287	4.21303	7.36733	36.9886	20.0953	21.0779	47.2341	35.8108	29.9956	112.817	24.5125	1.67009	-0.532305	2.20239	JAK2	-	chr19_57438399_+;chr19_57438456_+
chr19:5598798-5598911:mpeak_91517|chr19_5587410_5622938_SAFB2_NM_-|	36.8245	2.97312	1.46116	-2.03476	0.041875	0.214907	16.9531	5.35875	0.638724	1.15205	0	2.10495	24.659	41.5303	111.777	58.7546	60.0357	118.93	12.896	2.05515	2.81691	-0.417663	3.23458	SAFB2	-	chr19_5598802_-
chr17:76732444-76732619:mpeak_86942|chr17_76672251_76778424_CYTH1_NM_-|	39.7934	2.7907	1.02076	-2.73394	0.00625814	0.0917812	23.1178	40.1906	13.4132	12.6726	23.1717	5.78862	12.3295	38.8509	24.9102	59.9066	60.0357	163.134	100.829	14.7073	0.881911	-1.8954	2.77731	CYTH1	-	chr19_54158285_-;chr19_54158336_-
chr19:52642163-52642434:mpeak_96405|chr19_52620277_52643191_ZNF616_NM_-|	11.7174	2.89885	1.3113	-2.21068	0.0270583	NA	18.4943	21.435	14.6906	10.3685	11.5858	1.05248	7.70595	0	7.66468	14.9767	11.5858	21.0495	236.902	48.3214	1.24737	-1.63115	2.87852	ZNF616	-	chr19_52139021_-
chr19:47597649-47597907:mpeak_95677|chr19_47571126_47617009_ZC3H4_NM_-|	258.566	1.69561	0.861478	-1.96825	0.0490389	0.234637	298.991	257.22	106.667	443.54	473.966	172.606	29.2826	84.4003	98.3634	277.644	323.35	536.763	312.61	95.8123	-0.717662	-2.42374	1.70608	ZC3H4	-	chr19_47094417_-;chr19_47094455_-;chr19_47094530_-
chr17:76764650-76764900:mpeak_86947|chr17_76672251_76778424_CYTH1_NM_-|	33.6862	4.00364	1.13766	-3.51918	0.00043288	0.036538	7.70595	16.0762	12.1357	2.3041	6.31955	0.526238	12.3295	38.8509	24.9102	59.9066	60.0357	163.134	47.2041	3.23231	1.97288	-1.8954	3.86828	CYTH1	-	chr19_4476723_+
chr19:2431606-2431665:mpeak_91236|chr19_2430950_2456966_LMNB2_NM_-|	285.768	1.86729	0.929802	-2.00826	0.0446155	0.22231	72.4359	24.1144	41.517	21.889	10.5326	24.207	282.038	233.105	770.939	505.75	367.587	1075.1	10.7355	2.90635	1.28577	-0.599338	1.88511	LMNB2	-	chr19_2431614_-
chr19:24107641-24107782:mpeak_93695|chr19_24097683_24115144_ZNF726_NM_+|	46.8132	1.98091	0.831887	-2.38123	0.0172549	0.139432	132.542	115.213	112.415	67.971	61.089	42.6253	0	5.35875	4.47107	6.9123	6.31955	6.84109	2442.71	855.307	1.06891	-1.03002	2.09893	ZNF726	-	chr19_23925012_+
chr19:14108925-14108983:mpeak_92596|chr19_14073676_14117134_RFX1_NM_-|	140.804	1.17155	0.577503	-2.02866	0.0424933	0.216616	44.6945	37.5112	32.5749	21.889	16.8521	29.9956	237.343	211.67	183.314	225.802	278.06	369.945	18.1521	7.86634	0.739727	-0.466644	1.20637	RFX1	-	chr19_13998117_-
chr12:53665999-53666084:mpeak_43133|chr12_53662082_53687056_ESPL1_NM_+|	26.6203	6.3863	2.09918	-3.04229	0.00234784	0.06396	0	4.01906	13.4132	1.15205	0	0	4.62357	2.67937	48.543	27.6492	36.8641	180.5	46.8224	1.4106	3.91948	-2.13333	6.05282	ESPL1	-	chr18_47853303_-;chr18_47853349_-;chr18_47853392_-
chr2:152295212-152295265:mpeak_107647|chr2_152266396_152331370_RIF1_NM_+|	35.0704	2.95523	1.00625	-2.93686	0.00331552	0.0717277	7.70595	1.33969	16.6068	10.3685	7.37281	3.15743	15.4119	24.1144	16.6068	124.421	111.645	82.0931	45.6994	6.56861	0.295684	-2.50283	2.79851	RIF1	-	chr17_78736416_-
chr17:47872706-47872995:mpeak_82845|chr17_47865980_47904762_KAT7_NM_+|	58.6942	2.12309	0.817705	-2.5964	0.00942073	0.109	13.8707	8.03812	10.2196	5.76025	14.7456	6.84109	60.1064	41.5303	37.046	138.246	114.805	253.12	23.1669	5.40271	0.232468	-1.86784	2.10031	KAT7	-	chr17_49795432_+
chr17:76760234-76760349:mpeak_86945|chr17_76672251_76778424_CYTH1_NM_-|	31.8077	7.45808	1.75063	-4.26022	2.04229e-05	0.0138909	0	17.4159	5.10979	0	0	0	12.3295	38.8509	24.9102	59.9066	60.0357	163.134	44.4057	#DIV/0!	Inf	-1.8954	Inf	CYTH1	-	chr17_2681279_+
chr18:45379620-45379820:mpeak_89870|chr18_45368321_45457517_SMAD2_NM_-|	182.356	2.45265	0.657033	-3.73291	0.000189277	0.0276824	251.214	180.858	210.14	72.5792	30.5445	34.7317	223.473	190.235	236.966	226.954	166.415	364.157	98.6994	18.1981	2.21989	-0.219359	2.43925	SMAD2	-	chr17_17754689_+
chr16:89364202-89364273:mpeak_77167|chr16_89353521_89556969_ANKRD11_NR_-mpeak_77167|chr16_89335071_89556969_ANKRD11_NM_-||	47.9438	2.90873	1.2	-2.42395	0.0153527	0.13291	16.9531	22.7747	14.0519	12.6726	30.5445	2.10495	13.8707	13.3969	37.6847	81.7956	68.4618	261.014	82.7988	11.02	0.246849	-2.66264	2.90949	ANKRD11	-	chr16_89297795_-
chr16:89362578-89363008:mpeak_77166|chr16_89353521_89556969_ANKRD11_NR_-mpeak_77166|chr16_89335071_89556969_ANKRD11_NM_-||	48.2825	2.42243	1.0065	-2.40678	0.0160936	0.135664	18.4943	17.4159	12.1357	10.3685	29.4912	15.2609	13.8707	13.3969	37.6847	81.7956	68.4618	261.014	73.9712	13.4025	-0.198177	-2.66264	2.46446	ANKRD11	-	chr16_89296508_-
chr16:50401944-50402161:mpeak_74009|chr16_50353177_50402845_BRD7_NM_-|	160.815	1.61888	0.755538	-2.14269	0.0321383	0.186399	200.355	175.499	88.1439	153.223	106.379	62.0961	95.5538	88.4193	180.759	223.498	190.64	365.209	127.216	41.2779	0.52841	-1.09543	1.62384	BRD7	-	chr16_50368166_-
chr16:48412633-48412719:mpeak_73931|chr16_48396341_48419229_SIAH1_NM_-|	17.2119	2.7032	1.32262	-2.04383	0.0409708	NA	1.54119	16.0762	2.55489	3.45615	5.26629	8.41981	4.62357	4.01906	15.3294	24.1931	37.9173	83.1456	84.1495	11.8014	0.23482	-2.59918	2.834	SIAH1	-	chr16_48378723_-
chr16:3828129-3828207:mpeak_70711|chr16_3779875_3930121_CREBBP_NM_-|	126.408	1.66706	0.733531	-2.27265	0.0230472	0.157606	172.613	151.385	143.713	120.965	122.178	64.201	50.8593	69.6637	119.441	112.901	119.018	269.96	194.908	61.2387	0.60576	-1.06452	1.67028	CREBBP	-	chr16_3778160_-
chr16:2808696-2809051:mpeak_70452|chr16_2802329_2820858_SRRM2_NM_+|	227.31	1.81614	0.766389	-2.36974	0.0178008	0.141131	61.6476	32.1525	53.6528	49.5382	56.876	36.3104	104.801	136.648	311.697	470.037	478.179	936.177	26.6571	7.57403	0.04702	-1.76837	1.81539	SRRM2	-	chr16_2759005_+;chr16_2759042_+
chr16:2808359-2808557:mpeak_70451|chr16_2802329_2820858_SRRM2_NM_+|	1339.68	1.85206	0.72255	-2.56323	0.0103704	0.113543	2364.19	3045.11	1623.64	2334.05	2423.55	1848.15	104.801	136.648	311.697	470.037	478.179	936.177	1271.44	350.55	0.0904029	-1.76837	1.85877	SRRM2	-	chr16_2758473_+;chr16_2758508_+
chr15:91034562-91034741:mpeak_69266|chr15_90931472_91043226_IQGAP1_NM_+|	415.452	1.60522	0.735211	-2.18334	0.0290108	0.176789	132.542	96.4574	86.8664	43.7779	36.8641	21.0495	625.723	546.592	1144.59	521.879	526.629	1202.45	13.6331	4.51769	1.63511	0.0416588	1.59346	IQGAP1	-	chr15_90491406_+
chr15:77525595-77525654:mpeak_67992|chr15_77407661_77712446_PEAK1_NM_-|	34.7872	2.45366	1.18444	-2.07157	0.0383053	0.204898	4.62357	10.7175	2.55489	0	1.05326	1.05248	83.2243	66.9843	73.4532	49.5382	70.5683	53.6763	8.00135	1.81756	3.08724	0.364034	2.7232	PEAK1	-	chr15_77233254_-
chr1:197067745-197067964:mpeak_15946|chr1_197053556_197115824_ASPM_NM_-|	29.4581	3.59725	0.960154	-3.74653	0.000179295	0.0269668	18.4943	30.8128	8.30341	1.15205	8.42607	6.84109	20.0355	22.7747	17.8843	58.7546	56.876	103.143	94.9189	7.50513	1.81095	-1.8498	3.66075	ASPM	-	chr15_67602070_+
chr15:66063912-66063994:mpeak_66792|chr15_65954325_66084631_DENND4A_NM_-|	10.1266	3.3921	1.23383	-2.74926	0.00597303	NA	18.4943	8.03812	8.30341	2.3041	3.15978	0	9.24714	10.7175	13.4132	11.5205	14.7456	21.5758	104.368	17.131	2.67257	-0.519384	3.19196	DENND4A	-	chr15_65771604_-
chr15:64380955-64381055:mpeak_66470|chr15_64365227_64386207_FAM96A_NR_-mpeak_66470|chr15_64367736_64386207_FAM96A_NM_-||	65.3702	1.73143	0.814573	-2.12556	0.0335397	0.19072	123.295	92.4384	158.403	86.4038	77.9411	98.4065	6.16476	18.7556	19.1617	21.889	21.0652	60.5174	848.728	253.936	0.509868	-1.23097	1.74084	FAM96A	-	chr15_64088795_-
chr15:63548701-63548774:mpeak_66326|chr15_63481727_63555725_RAB8B_NM_+|	16.132	3.11464	1.22671	-2.53901	0.0111167	NA	16.9531	13.3969	14.0519	5.76025	5.26629	9.99852	3.08238	4.01906	16.6068	14.9767	15.7989	73.6733	187.284	20.1295	1.07851	-2.13934	3.21785	RAB8B	-	chr15_63256558_+
chr15:57810579-57810639:mpeak_65956|chr15_57668702_57839552_CGNL1_NM_+|	4.62735	4.64452	1.8566	-2.50163	0.0123623	NA	12.3295	2.67937	5.10979	1.15205	2.10652	0	6.16476	0	1.27745	5.76025	5.26629	13.6822	180.221	19.7819	2.62623	-1.73122	4.35744	CGNL1	-	chr15_57518431_+
chr18:13731463-13731547:mpeak_88414|chr18_13726658_13759940_RNMT_NM_+|	68.675	2.57504	0.843158	-3.05403	0.00225786	0.0634208	49.3181	46.889	37.046	27.6492	23.1717	17.3659	23.1178	40.1906	89.4213	102.533	112.699	254.699	87.2476	14.51	0.966605	-1.62147	2.58807	RNMT	-	chr15_41526744_-;chr15_41526766_-
chr15:101815449-101815570:mpeak_69894|chr15_101811850_101817725_VIMP_NM_-|	201.424	1.87424	0.804559	-2.32952	0.0198315	0.147149	588.735	379.131	584.432	341.007	219.078	224.704	4.62357	8.03812	14.6906	18.4328	7.37281	26.8381	5675.19	1490.75	0.98403	-0.944599	1.92863	VIMP	-	chr15_101275305_-
chr14:75266309-75266407:mpeak_60692|chr14_75230068_75302477_YLPM1_NM_+|	72.8819	1.90077	0.875423	-2.17126	0.0299118	0.179623	7.70595	9.37781	5.74851	4.6082	2.10652	4.2099	61.6476	76.3621	153.932	169.351	153.776	225.756	7.82082	1.99034	1.06349	-0.910817	1.97431	YLPM1	-	chr14_74799657_+;chr14_74799750_+
chr14:35231262-35231441:mpeak_56646|chr14_35222910_35344853_BAZ1A_NM_-|	13.991	3.2464	1.45332	-2.23378	0.0254973	NA	23.1178	6.69843	7.66468	4.6082	3.15978	0	6.16476	5.35875	31.2975	16.1287	24.2249	39.4679	87.5295	14.5975	2.27055	-0.89846	3.16901	BAZ1A	-	chr14_34762160_-;chr14_34762212_-
chr14:104145731-104145888:mpeak_62935|chr14_104095524_104167537_KLC1_NM_+|	86.8863	2.23113	0.99618	-2.23969	0.0251111	0.164117	95.5538	34.8319	45.9881	31.1054	28.438	4.73614	86.3066	91.0987	121.357	79.4915	143.243	280.485	59.0347	12.7736	1.45621	-0.752187	2.20839	KLC1	-	chr14_103679516_+
chr4:95921600-95921686:mpeak_142882|chr4_95679127_96075698_BMPR1B_NM_+|	237.444	2.06601	0.638193	-3.23729	0.00120672	0.0512685	154.119	162.102	99.6409	127.878	104.273	101.564	169.531	127.27	183.952	328.334	442.369	848.296	86.5021	20.6124	0.317492	-1.75173	2.06922	BMPR1B	-	chr13_96096028_+
chr5:65917973-65918190:mpeak_150830|chr5_65892175_66458974_MAST4_NM_+|	66.196	2.95074	1.03704	-2.84533	0.0044365	0.0798646	43.1533	72.3431	10.8583	17.2808	15.7989	3.15743	36.9886	76.3621	84.9502	142.854	163.255	127.35	63.7187	8.35998	1.80194	-1.1282	2.93015	MAST4	-	chr13_40802306_+
chr12:9451392-9451465:mpeak_39364|chr12_9436252_9465700_LOC642846_NR_+|	13.3825	2.3753	1.03308	-2.29923	0.0214919	NA	9.24714	12.0572	6.38724	5.76025	2.10652	1.05248	16.9531	21.435	10.8583	24.1931	27.3847	23.1545	56.2306	11.9349	1.63445	-0.601714	2.23617	LOC642846	-	chr12_9298867_+
chr12:14591035-14591205:mpeak_39911|chr12_14518565_14650587_ATF7IP_NM_+|	218.092	1.97784	0.849356	-2.32863	0.0198785	0.147364	77.0595	32.1525	45.9881	41.4738	32.651	15.7871	149.495	159.423	416.448	349.071	508.724	788.831	21.3961	5.46038	0.787544	-1.18273	1.97028	ATF7IP	-	chr12_14438204_+
chr6:56996750-56996809:mpeak_163513|chr6_56954807_57033220_ZNF451_NM_+|	29.8802	2.38703	0.892484	-2.67459	0.00748208	0.0989567	13.8707	13.3969	3.83234	6.9123	4.21303	7.36733	24.659	18.7556	27.4651	69.123	60.0357	108.931	43.877	7.76709	0.749957	-1.74806	2.49802	ZNF451	-	chr12_131766213_+;chr12_131766248_+
chr12:124886943-124887091:mpeak_50037|chr12_124810129_125052010_NCOR2_NM_-|	652.572	1.2991	0.491274	-2.64434	0.00818502	0.102635	124.836	131.289	85.589	58.7546	56.876	55.7812	1179.01	1016.82	1068.58	1474.63	1588.31	990.38	10.4679	4.22892	0.995326	-0.312278	1.3076	NCOR2	-	chr12_124402481_-
chr12:110573128-110573252:mpeak_48133|chr12_110562139_110655848_IFT81_NM_+|	15.8033	5.65288	1.55983	-3.62404	0.000290036	NA	32.365	28.1334	30.02	27.6492	36.8641	10.5248	0	0	0	4.6082	6.31955	13.156	#DIV/0!	311.572	0.270589	-Inf	Inf	IFT81	-	chr12_110135416_+
chr16:89427937-89427991:mpeak_77181|chr16_89353521_89556969_ANKRD11_NR_-mpeak_77181|chr16_89335071_89556969_ANKRD11_NM_-||	43.1597	3.20342	1.0973	-2.91937	0.00350744	0.0734272	12.3295	6.69843	5.74851	6.9123	7.37281	2.63119	13.8707	13.3969	37.6847	81.7956	68.4618	261.014	38.1457	4.11317	0.550556	-2.66264	3.2132	ANKRD11	-	chr12_107078349_-
chr12:105541828-105541887:mpeak_47678|chr12_105501491_105560641_KIAA1033_NM_+|	37.0728	2.46043	1.24519	-1.97595	0.0481607	0.232009	4.62357	2.67937	11.497	0	5.26629	0	53.9416	45.5493	85.589	78.3395	57.9292	99.459	10.1578	6.70217	1.83587	-0.348973	2.18484	KIAA1033	-	chr12_105148109_+
chr11:9332351-9332406:mpeak_30325|chr11_9302588_9336315_TMEM41B_NR_-mpeak_30325|chr11_9305140_9336315_TMEM41B_NM_-||	18.7657	4.75578	1.64269	-2.89511	0.00379028	NA	3.08238	4.01906	8.30341	0	1.05326	0	20.0355	21.435	40.2396	26.4972	15.7989	84.7243	18.8531	2.48761	3.87045	-0.636475	4.50693	TMEM41B	-	chr11_9310803_-
chr17:76714208-76714417:mpeak_86939|chr17_76672251_76778424_CYTH1_NM_-|	32.967	3.46942	1.06006	-3.27285	0.00106469	0.0487591	6.16476	14.7366	6.38724	2.3041	4.21303	2.63119	12.3295	38.8509	24.9102	59.9066	60.0357	163.134	35.8632	3.23175	1.57672	-1.8954	3.47212	CYTH1	-	chr11_90207053_-
chr11:64543988-64544111:mpeak_33569|chr11_64532990_64546316_SF1_NR_-mpeak_33569|chr11_64533627_64546316_SF1_NM_-||	14.4177	3.27553	1.39928	-2.34086	0.0192394	NA	29.2826	13.3969	38.9621	24.1931	27.3847	12.1035	0	0	2.55489	4.6082	4.21303	16.3134	1065.17	253.361	0.358436	-3.29834	3.65678	SF1	-	chr11_64776478_-
chr11:46772664-46772757:mpeak_32333|chr11_46765815_46867859_CKAP5_NM_-|	131.958	1.56852	0.758773	-2.06718	0.0387171	0.206411	112.507	49.5684	83.6728	39.1697	25.2782	22.6282	166.449	158.083	287.426	155.527	139.03	344.16	40.1577	13.633	1.49683	-0.0617455	1.55858	CKAP5	-	chr11_46751140_-
chr11:22849378-22849435:mpeak_31276|chr11_22844679_22851382_SVIP_NM_-|	81.6557	2.96432	1.14749	-2.5833	0.00978599	0.11096	13.8707	9.37781	8.94213	1.15205	1.05326	2.63119	75.5183	99.1368	235.05	127.878	73.7281	331.53	7.85702	0.90718	2.73461	-0.379916	3.11452	SVIP	-	chr11_22827832_-
chr11:116771063-116771184:mpeak_37421|chr11_116716345_116969131_SIK3_NM_-|	24.5687	2.08414	1.00655	-2.07057	0.0383988	0.205266	18.4943	21.435	3.19362	5.76025	7.37281	2.63119	27.7414	33.4922	31.2975	57.6025	35.8108	49.9926	46.6037	10.9927	1.4518	-0.632096	2.08389	SIK3	-	chr11_116900351_-
chr11:116720439-116720634:mpeak_37414|chr11_116716345_116969131_SIK3_NM_-|	21.9537	2.55146	1.1094	-2.29986	0.0214561	0.152097	4.62357	10.7175	5.74851	1.15205	5.26629	0	27.7414	33.4922	31.2975	57.6025	35.8108	49.9926	22.7919	6.71347	1.71626	-0.632096	2.34835	SIK3	-	chr11_116849721_-
chr6:136568532-136568591:mpeak_167373|chr6_136552526_136571449_MTFR2_NM_-|	38.0548	4.09419	1.25988	-3.24967	0.00115539	0.0504457	16.9531	5.35875	5.74851	0	7.37281	0	32.365	24.1144	24.9102	119.813	72.6748	147.347	34.4766	6.50858	1.92825	-2.06192	3.99016	MTFR2	-	chr10_94546437_+
chr10:93711142-93711311:mpeak_26220|chr10_93683735_93788546_BTAF1_NM_+|	13.3539	3.02183	1.23363	-2.44954	0.0143037	NA	27.7414	13.3969	7.66468	10.3685	11.5858	2.63119	7.70595	4.01906	5.74851	17.2808	8.42607	43.6778	279.297	35.4337	0.989162	-1.98944	2.97861	BTAF1	-	chr10_91951439_+
chr10:874301-874738:mpeak_19897|chr10_859153_977645_LARP4B_NM_-|	182.021	1.65425	0.8349	-1.98137	0.0475496	0.230254	40.0709	65.6446	17.8843	33.4095	41.0771	19.997	127.919	154.064	292.535	341.007	361.268	689.372	21.5137	6.78934	0.387541	-1.27637	1.66391	LARP4B	-	chr10_828495_-
chr10:80978353-80978554:mpeak_25354|chr10_80828791_81072398_ZMIZ1_NM_+|	247.737	2.11583	0.93227	-2.26955	0.0232348	0.158309	221.931	707.355	137.964	129.03	271.741	73.1471	166.449	142.007	181.397	258.059	235.93	447.829	217.872	50.3194	1.17119	-0.9431	2.11429	ZMIZ1	-	chr10_79218745_+
chr7:129257962-129258145:mpeak_177497|chr7_129251542_129394857_NRF1_NM_+mpeak_177497|chr7_129251542_129394857_NRF1_NM_+||	27.9497	3.22105	1.01523	-3.17272	0.00151018	0.0560564	4.62357	17.4159	10.2196	3.45615	9.47933	3.15743	12.3295	29.4731	10.8583	99.0764	86.3672	48.9401	61.2581	6.86605	1.00328	-2.15407	3.15735	NRF1	-	chr10_79217573_+
chr10:65128872-65128984:mpeak_24103|chr10_64927894_65225761_JMJD1C_NM_-|	23.1775	1.93511	0.982633	-1.96931	0.0489171	0.234266	12.3295	28.1334	8.94213	8.06436	27.3847	7.36733	9.24714	14.7366	18.523	39.1697	50.5564	53.6763	116.229	29.8575	0.206495	-1.75431	1.9608	JMJD1C	-	chr10_63369173_-
chr10:32103200-32103293:mpeak_22351|chr10_32096760_32217804_ARHGAP12_NM_-|	103.375	1.65697	0.691378	-2.39662	0.016547	0.137187	72.4359	71.0034	51.7366	80.6436	81.1009	51.0451	38.5297	58.9462	88.7826	163.591	160.095	322.584	104.788	32.9258	-0.124652	-1.79483	1.67018	ARHGAP12	-	chr10_31814272_-;chr10_31814359_-
chr10:18861750-18862545:mpeak_21259|chr10_18835074_18940566_NSUN6_NM_-|	17.8441	4.34696	1.56438	-2.77871	0.00545758	NA	30.8238	62.9653	17.2455	21.889	18.9587	2.10495	6.16476	0	1.27745	6.9123	6.31955	39.4679	994.639	81.5044	1.37019	-2.82399	4.19419	NSUN6	-	chr10_18572839_-;chr10_18572906_-;chr10_18572962_-;chr10_18573013_-;chr10_18573057_-;chr10_18573162_-;chr10_18573255_-;chr10_18573425_-
chr10:18861469-18861732:mpeak_21258|chr10_18835074_18940566_NSUN6_NM_-|	12.6696	4.00272	1.84734	-2.16675	0.0302542	NA	15.4119	45.5493	1.27745	8.06436	20.0119	1.57871	6.16476	0	1.27745	6.9123	6.31955	39.4679	557.529	56.2716	1.06954	-2.82399	3.89353	NSUN6	-	chr10_18572510_-;chr10_18572545_-
chr10:18860553-18861195:mpeak_21256|chr10_18835074_18940566_NSUN6_NM_-|	17.397	3.75415	1.46545	-2.56177	0.0104141	NA	35.4474	49.5684	8.94213	17.2808	27.3847	9.99852	6.16476	0	1.27745	6.9123	6.31955	39.4679	841.667	103.727	0.781423	-2.82399	3.60542	NSUN6	-	chr10_18571701_-;chr10_18571864_-
chr10:18858743-18859422:mpeak_21253|chr10_18835074_18940566_NSUN6_NM_-|	12.5262	3.40146	1.65431	-2.05612	0.0397709	NA	21.5767	29.4731	1.27745	11.5205	17.9054	8.41981	6.16476	0	1.27745	6.9123	6.31955	39.4679	468.743	71.8139	0.467431	-2.82399	3.29142	NSUN6	-	chr10_18569868_-;chr10_18570487_-
chr10:18854946-18855194:mpeak_21245|chr10_18835074_18940566_NSUN6_NM_-|	11.3422	3.8811	1.89707	-2.04583	0.0407727	NA	15.4119	29.4731	5.10979	8.06436	17.9054	0	6.16476	0	1.27745	6.9123	6.31955	39.4679	447.849	73.9181	0.944946	-2.82399	3.76894	NSUN6	-	chr10_18566033_-
chr10:18852894-18853241:mpeak_21241|chr10_18835074_18940566_NSUN6_NM_-|	10.1549	4.9954	1.5428	-3.23787	0.00120426	NA	16.9531	22.7747	9.58085	3.45615	7.37281	1.57871	6.16476	0	1.27745	6.9123	6.31955	39.4679	441.702	23.5441	1.99061	-2.82399	4.8146	NSUN6	-	chr10_18563992_-
chr10:13647656-13647765:mpeak_20885|chr10_13628938_13672259_PRPF18_NM_+|	28.4334	3.35998	1.26892	-2.64789	0.00809951	0.102046	9.24714	5.35875	7.66468	1.15205	1.05326	0	70.8947	38.8509	68.3434	44.93	47.3966	46.3089	12.5053	2.38609	3.33609	0.361302	2.97478	PRPF18	-	chr10_13605728_+
chr1:235374014-235374064:mpeak_19092|chr1_235331967_235491532_ARID4B_NM_-|	21.7817	3.94862	1.30685	-3.02147	0.0025155	0.0650807	6.16476	12.0572	2.55489	0	4.21303	0	20.0355	29.4731	12.7745	65.6669	47.3966	61.0436	33.3587	7.25938	2.30204	-1.48306	3.78511	ARID4B	-	chr10_110920634_+
chr10:112356170-112356313:mpeak_27876|chr10_112327448_112363988_SMC3_NM_+|	74.5434	2.41466	1.07151	-2.25351	0.0242268	0.161476	126.378	104.496	64.5111	119.813	131.657	34.7317	7.70595	12.0572	30.02	42.6259	42.1303	178.395	593.342	108.76	0.0455573	-2.40216	2.44772	SMC3	-	chr10_110596469_+;chr10_110596515_+;chr10_110596547_+
chr10:112341675-112341823:mpeak_27870|chr10_112327448_112363988_SMC3_NM_+|	53.4267	2.45312	1.13067	-2.16962	0.0300356	0.180106	100.177	34.8319	33.8523	58.7546	78.9944	21.5758	7.70595	12.0572	30.02	42.6259	42.1303	178.395	339.194	60.545	0.0838704	-2.40216	2.48603	SMC3	-	chr10_110581927_+
chr10:112340687-112340786:mpeak_27869|chr10_112327448_112363988_SMC3_NM_+|	61.1705	2.51225	1.14428	-2.19548	0.028129	0.173988	115.589	64.305	40.8783	88.7079	92.6868	18.9446	7.70595	12.0572	30.02	42.6259	42.1303	178.395	443.468	76.1309	0.140115	-2.40216	2.54228	SMC3	-	chr10_110580982_+
chr10:105763231-105763295:mpeak_27718|chr10_105726942_105785331_SLK_NM_+|	84.4315	1.57596	0.636859	-2.47458	0.0133392	0.125139	86.3066	57.6065	91.3375	73.7313	49.5032	77.8832	43.1533	41.5303	76.6468	111.749	122.178	181.552	145.819	48.4062	0.226159	-1.36476	1.59092	SLK	-	chr10_104003525_+
chr1:9634794-9634886:mpeak_742|chr1_9599527_9642356_SLC25A33_NM_+|	39.2509	2.25019	1.0303	-2.18403	0.0289602	0.17665	57.024	40.1906	72.8145	23.041	10.5326	12.1035	13.8707	21.435	76.6468	44.93	21.0652	77.357	151.876	31.8635	1.89624	-0.356676	2.25292	SLC25A33	-	chr1_9574807_+
chr1:45228012-45228129:mpeak_4309|chr1_45205489_45232768_KIF2C_NM_+|	43.3641	2.70179	1.30121	-2.07637	0.03786	0.203805	24.659	17.4159	25.5489	10.3685	11.5858	6.84109	6.16476	12.0572	93.8924	51.8423	42.1303	217.863	60.3169	9.23417	1.2317	-1.47581	2.70751	KIF2C	-	chr1_44762395_+
chr1:155039583-155039641:mpeak_12605|chr1_155036212_155041328_EFNA4_NM_+|	21.5826	4.18457	1.37276	-3.04829	0.00230146	0.0635823	9.24714	10.7175	1.91617	4.6082	2.10652	0	4.62357	20.0953	12.7745	51.8423	37.9173	103.143	58.3592	5.22134	1.70427	-2.36316	4.06743	EFNA4	-	chr1_44636363_+;chr1_44636442_+;chr1_44636491_+;chr1_44636532_+
chr1:39800906-39801069:mpeak_3640|chr1_39549838_39951209_MACF1_NM_+|	87.7943	2.30876	0.999256	-2.31048	0.0208618	0.150226	10.7883	6.69843	13.4132	3.45615	6.31955	0	114.048	115.213	202.475	164.743	164.308	252.068	7.15713	2.52333	1.66033	-0.428684	2.08902	MACF1	-	chr1_39335280_+;chr1_39335294_+
chr1:36644522-36644634:mpeak_3344|chr1_36621565_36645848_MAP7D1_NM_+|	113.236	2.00533	0.867995	-2.3103	0.0208713	0.150226	50.8593	16.0762	21.7166	6.9123	11.5858	3.68367	214.225	142.007	274.012	162.439	153.776	301.534	14.0663	3.59075	1.99878	0.0288903	1.96989	MAP7D1	-	chr1_36178957_+;chr1_36178978_+
chr1:247078058-247078124:mpeak_19665|chr1_247004300_247094726_AHCTF1_NM_-|	27.6955	2.72101	1.27147	-2.14004	0.0323514	0.187148	16.9531	26.7937	1.27745	9.21641	16.8521	4.2099	10.7883	12.0572	23.6328	55.2984	34.7575	120.509	96.8716	14.3797	0.572412	-2.17963	2.75205	AHCTF1	-	chr1_246914749_-
chr1:244573643-244573714:mpeak_19452|chr1_244572940_244615436_ADSS_NM_-|	40.8171	3.49834	1.72154	-2.0321	0.0421439	0.215531	30.8238	28.1334	0	5.76025	6.31955	0	20.0355	25.454	83.0341	57.6025	60.0357	172.606	68.809	6.24292	2.28707	-1.17523	3.46231	ADSS	-	chr1_244410330_-
chr1:214826262-214826345:mpeak_17684|chr1_214776531_214836933_CENPF_NM_+|	55.098	2.10469	0.851495	-2.47176	0.0134449	0.125648	3.08238	9.37781	5.10979	5.76025	9.47933	2.10495	44.6945	44.2097	37.6847	160.135	153.776	185.762	13.8796	3.47118	0.018631	-1.98083	1.99946	CENPF	-	chr1_214652969_+
chr1:214795413-214795634:mpeak_17663|chr1_214776531_214836933_CENPF_NM_+|	84.3861	1.40692	0.708158	-1.98672	0.0469529	0.228599	66.2712	48.2287	40.2396	103.685	95.8465	32.1005	44.6945	44.2097	37.6847	160.135	153.776	185.762	122.238	46.3567	-0.581991	-1.98083	1.39884	CENPF	-	chr1_214622187_+;chr1_214622212_+
chr1:214787062-214787268:mpeak_17659|chr1_214776531_214836933_CENPF_NM_+|	71.2514	1.51975	0.694097	-2.18953	0.0285583	0.175344	47.7769	25.454	22.994	65.6669	42.1303	24.7332	44.6945	44.2097	37.6847	160.135	153.776	185.762	76.0138	26.5234	-0.46184	-1.98083	1.51899	CENPF	-	chr1_214613778_+;chr1_214613843_+
chr17:65533299-65533365:mpeak_85876|chr17_65373396_65688687_PITPNC1_NM_+|	25.2748	4.88412	1.56616	-3.11852	0.00181761	0.0586438	13.8707	22.7747	14.0519	0	3.15978	0	7.70595	14.7366	72.1758	25.3451	30.5445	98.9328	53.5809	6.12271	4.00401	-0.710423	4.71444	PITPNC1	-	chr1_202914430_-;chr1_202914502_-
chr1:200821625-200821866:mpeak_16272|chr1_200708685_200826881_CAMSAP2_NM_+|	139.198	1.52789	0.655794	-2.32983	0.0198149	0.147137	278.955	270.617	182.675	150.919	114.805	102.616	46.2357	69.6637	115.609	95.6202	87.4205	155.24	316.294	108.886	0.991291	-0.547157	1.53845	CAMSAP2	-	chr1_200852556_+;chr1_200852592_+;chr1_200852647_+;chr1_200852679_+
chr1:197107887-197108327:mpeak_15961|chr1_197053556_197115824_ASPM_NM_-|	31.3858	1.53657	0.733533	-2.09475	0.036193	0.198799	15.4119	12.0572	15.3294	13.8246	24.2249	16.3134	20.0355	22.7747	17.8843	58.7546	56.876	103.143	70.5146	24.849	-0.345065	-1.8498	1.50474	ASPM	-	chr1_197138872_-
chr1:176009434-176009520:mpeak_14676|chr1_175914306_176176380_RFWD2_NM_-|	37.4169	3.12121	1.17564	-2.6549	0.00793314	0.101075	15.4119	8.03812	7.02596	2.3041	5.26629	0	32.365	28.1334	77.9243	84.0997	54.7695	133.664	22.0166	4.16668	2.00923	-0.977354	2.98659	RFWD2	-	chr1_176040291_-
chr2:71612155-71612326:mpeak_102799|chr2_71558884_71661871_ZNF638_NM_+|	44.9356	2.736	0.774579	-3.53223	0.000412065	0.0360201	20.0355	12.0572	18.523	3.45615	9.47933	3.15743	38.5297	62.9653	54.9302	112.901	86.3672	116.825	32.3577	5.09119	1.65316	-1.01488	2.66803	ZNF638	-	chr1_171591456_+
chr1:169443300-169443420:mpeak_14097|chr1_169435215_169455208_SLC19A2_NM_-|	19.6561	2.85808	1.41506	-2.01975	0.0434094	NA	6.16476	1.33969	6.38724	1.15205	1.05326	0	32.365	26.7937	58.1238	28.8013	25.2782	48.4139	11.8446	3.22749	2.65517	0.194458	2.46071	SLC19A2	-	chr1_169474073_-
chr1:155408115-155408271:mpeak_12714|chr1_155307542_155532324_ASH1L_NM_-|	206.114	1.48217	0.644583	-2.29943	0.0214807	0.152151	167.99	121.911	111.777	67.971	78.9944	54.7288	172.613	198.274	406.228	324.878	290.699	477.298	51.6883	18.4554	0.993869	-0.491929	1.4858	ASH1L	-	chr1_155438352_-
chr3:129146586-129146834:mpeak_132380|chr3_129120694_129147494_EFCAB12_NM_-|	4.55132	10.9831	2.62996	-4.17613	2.96505e-05	NA	12.3295	10.7175	17.8843	0	0	0	0	0	0	0	3.15978	10.5248	#DIV/0!	#DIV/0!	Inf	-Inf	Inf	EFCAB12	-	-
chr2:61203577-61203649:mpeak_101650|chr2_61169568_61245365_PUS10_NM_-|	2.05128	7.97803	3.13735	-2.54292	0.0109929	NA	1.54119	2.67937	7.66468	0	1.05326	0	0	0	0	1.15205	0	10.5248	#DIV/0!	18.0402	3.49624	-Inf	Inf	PUS10	-	-
chr5:59756354-59756516:mpeak_150318|chr5_58270907_59783925_PDE4D_NM_-|	4.43053	6.29109	2.44313	-2.57501	0.0100237	NA	10.7883	9.37781	6.38724	3.45615	3.15978	3.15743	0	0	0	0	0	16.8396	#DIV/0!	19.346	1.44197	-Inf	Inf	PDE4D	-	-
chr1:42086096-42086284:mpeak_3953|chr1_41976937_42384378_HIVEP3_NM_-|	5.25656	6.14597	2.50342	-2.45503	0.0140873	NA	9.24714	14.7366	0	4.6082	9.47933	0	0	0	0	9.21641	5.26629	10.5248	#DIV/0!	84.5	0.767635	-Inf	Inf	HIVEP3	-	-
chr5:59755770-59755885:mpeak_150317|chr5_58270907_59783925_PDE4D_NM_-|	19.8347	6.10901	2.03093	-3.00799	0.00262984	NA	69.3535	28.1334	57.4851	23.041	16.8521	26.3119	0	0	0	0	0	16.8396	#DIV/0!	131.05	1.227	-Inf	Inf	PDE4D	-	-
chr2:61219830-61219891:mpeak_101651|chr2_61169568_61245365_PUS10_NM_-|	4.48976	5.89791	2.23911	-2.63404	0.00843743	NA	10.7883	14.7366	5.74851	4.6082	5.26629	1.05248	0	0	0	1.15205	0	10.5248	#DIV/0!	62.3856	1.51704	-Inf	Inf	PUS10	-	-
chr19:12588992-12589043:mpeak_92388|chr19_12576547_12595632_ZNF709_NM_-|	4.71011	5.87263	2.25163	-2.60817	0.00910269	NA	4.62357	21.435	5.74851	4.6082	7.37281	0	0	0	0	1.15205	5.26629	6.31486	#DIV/0!	141.139	1.4086	-Inf	Inf	ZNF709	-	-
chr12:110564228-110564410:mpeak_48129|chr12_110562139_110655848_IFT81_NM_+|	7.57741	5.87035	1.78944	-3.28055	0.00103605	NA	10.7883	16.0762	12.1357	11.5205	14.7456	1.57871	0	0	0	4.6082	6.31955	13.156	#DIV/0!	115.617	0.486076	-Inf	Inf	IFT81	-	-
chr5:58666106-58666331:mpeak_150297|chr5_58270907_59783925_PDE4D_NM_-|	5.7419	5.81777	2.47703	-2.34868	0.0188399	NA	10.7883	17.4159	6.38724	1.15205	8.42607	7.89357	0	0	0	0	0	16.8396	#DIV/0!	34.5845	0.985398	-Inf	Inf	PDE4D	-	-
chr8:128447709-128447788:mpeak_187696|chr8_128302305_128494384_CASC8_NR_-|	3.68291	5.66347	2.59863	-2.17941	0.0293014	NA	9.24714	14.7366	1.91617	2.3041	6.31955	0	0	0	0	2.3041	0	7.36733	#DIV/0!	89.1662	1.58657	-Inf	Inf	CASC8	-	-
chr4:103177802-103177930:mpeak_143459|chr4_103174587_103266655_SLC39A8_NM_-|	8.47091	4.95622	2.24905	-2.2037	0.0275457	NA	33.9062	6.69843	20.4392	6.9123	21.0652	3.68367	0	0	0	0	0	8.94605	#DIV/0!	117.971	0.947131	-Inf	Inf	SLC39A8	-	-
chr1:42028284-42028387:mpeak_3947|chr1_41976937_42384378_HIVEP3_NM_-|	5.76222	4.91244	1.7939	-2.73842	0.00617359	NA	6.16476	10.7175	1.91617	6.9123	13.6924	4.73614	0	0	0	9.21641	5.26629	10.5248	#DIV/0!	101.333	-0.430851	-Inf	Inf	HIVEP3	-	-
chr5:79017098-79017217:mpeak_152109|chr5_78985658_79095192_CMYA5_NM_+|	8.95171	4.9118	1.99202	-2.46574	0.013673	NA	15.4119	40.1906	5.74851	9.21641	20.0119	6.84109	0	0	0	0	2.10652	7.89357	#DIV/0!	240.461	0.766311	-Inf	Inf	CMYA5	-	-
chr1:42302891-42303065:mpeak_3964|chr1_41976937_42384378_HIVEP3_NM_-|	4.49568	4.76781	1.92142	-2.48139	0.013087	NA	0	6.69843	4.47107	4.6082	9.47933	3.68367	0	0	0	9.21641	5.26629	10.5248	#DIV/0!	71.0636	-0.669977	-Inf	Inf	HIVEP3	-	-
chr4:103245657-103245727:mpeak_143478|chr4_103174587_103266655_SLC39A8_NM_-|	12.4263	4.75013	2.00733	-2.36639	0.0179627	NA	30.8238	10.7175	45.3494	19.5849	20.0119	13.6822	0	0	0	0	0	8.94605	#DIV/0!	198.52	0.705635	-Inf	Inf	SLC39A8	-	-
chr1:42330705-42330862:mpeak_3976|chr1_42314116_42501596_HIVEP3_NR_-mpeak_3976|chr1_41976937_42384378_HIVEP3_NM_-||	4.43422	4.67715	1.95961	-2.38677	0.016997	NA	0	6.69843	3.83234	3.45615	10.5326	3.68367	0	0	0	9.21641	5.26629	10.5248	#DIV/0!	70.6685	-0.746887	-Inf	Inf	HIVEP3	-	-
chr1:42311152-42311210:mpeak_3968|chr1_41976937_42384378_HIVEP3_NM_-|	7.54953	4.50282	1.76148	-2.55627	0.0105802	NA	13.8707	5.35875	4.47107	3.45615	20.0119	18.4183	0	0	0	9.21641	5.26629	10.5248	#DIV/0!	167.496	-0.821563	-Inf	Inf	HIVEP3	-	-
chr6:28967979-28968029:mpeak_160939|chr6_28964363_28973037_ZNF311_NM_-|	4.60153	4.27561	2.16803	-1.97211	0.0485967	NA	3.08238	1.33969	0	3.45615	3.15978	5.78862	0	0	0	5.76025	6.31955	26.3119	#DIV/0!	32.3105	-1.48808	-Inf	Inf	ZNF311	-	-
chr1:42014468-42014606:mpeak_3943|chr1_41976937_42384378_HIVEP3_NM_-|	8.81581	3.88041	1.69027	-2.29573	0.0216914	NA	9.24714	10.7175	1.91617	11.5205	26.3315	21.0495	0	0	0	9.21641	5.26629	10.5248	#DIV/0!	235.536	-1.42864	-Inf	Inf	HIVEP3	-	-
chr12:110618305-110618385:mpeak_48140|chr12_110562139_110655848_IFT81_NM_+|	5.08301	3.87452	1.92394	-2.01385	0.0440251	NA	6.16476	2.67937	1.27745	11.5205	12.6391	2.63119	0	0	0	4.6082	6.31955	13.156	#DIV/0!	111.24	-1.4043	-Inf	Inf	IFT81	-	-
chr3:30720319-30720390:mpeak_126153|chr3_30647993_30732911_TGFBR2_NM_+|	102.966	3.18525	1.31934	-2.41428	0.0157665	0.134511	251.214	117.892	320.639	134.79	71.6216	277.854	3.08238	1.33969	3.83234	8.06436	2.10652	43.1515	8356.09	908.184	0.510267	-2.6915	3.20177	TGFBR2	-	-
chr1:121115825-121116054:mpeak_10143|chr1_121107151_121129494_SRGAP2D_NR_+|	60.128	2.62078	1.31773	-1.98887	0.0467159	0.22792	163.366	163.442	79.2017	92.1641	152.723	53.15	0	0	2.55489	2.3041	2.10652	10.5248	5297.15	1995.51	0.446024	-2.5474	2.99342	SRGAP2D	-	-
chr8:68097791-68097999:mpeak_182930|chr8_67976602_68107616_CSPP1_NM_+|	25.5025	3.39418	1.29244	-2.62617	0.00863514	0.105042	86.3066	41.5303	45.9881	51.8423	22.1184	17.3659	1.54119	1.33969	3.19362	6.9123	2.10652	25.7857	2861.56	262.399	0.928529	-2.51844	3.44697	CSPP1	-	-
chr8:68097523-68097589:mpeak_182929|chr8_67976602_68107616_CSPP1_NM_+|	25.1355	3.36352	1.2461	-2.69925	0.00694967	0.0959551	77.0595	32.1525	60.6787	40.3218	21.0652	29.4693	1.54119	1.33969	3.19362	6.9123	2.10652	25.7857	2796.79	261.048	0.902949	-2.51844	3.42139	CSPP1	-	-
chr2:204080682-204080847:mpeak_111163|chr2_203879601_204081975_NBEAL1_NM_+|	21.496	3.24131	1.56428	-2.07208	0.0382584	0.204688	29.2826	75.0225	1.91617	19.5849	60.0357	22.102	3.08238	0	1.91617	9.21641	11.5858	24.207	1416.69	226.004	0.0624318	-3.17064	3.23307	NBEAL1	-	-
chr10:7811101-7811277:mpeak_20341|chr10_7795562_7829990_KIN_NR_-mpeak_20341|chr10_7798105_7829990_KIN_NM_-||	89.0426	2.27758	0.866452	-2.62863	0.00857292	0.104909	183.402	198.274	145.629	139.398	126.391	107.879	18.4943	2.67937	16.6068	27.6492	25.2782	76.8308	1395.71	287.973	0.496878	-1.78011	2.27699	KIN	-	-
chr10:93718856-93719147:mpeak_26227|chr10_93683735_93788546_BTAF1_NM_+|	46.0956	2.15263	1.02573	-2.09864	0.0358485	0.197796	107.883	100.476	35.1298	80.6436	96.8998	45.2565	7.70595	4.01906	5.74851	17.2808	8.42607	43.6778	1393.48	321.109	0.128112	-1.98944	2.11756	BTAF1	-	-
chr8:67998236-67998357:mpeak_182897|chr8_67976602_68107616_CSPP1_NM_+|	14.5346	2.93214	1.30583	-2.24542	0.024741	NA	36.9886	20.0953	20.4392	20.7369	24.2249	11.051	1.54119	1.33969	3.19362	6.9123	2.10652	25.7857	1276.21	160.936	0.468866	-2.51844	2.9873	CSPP1	-	-
chr1:121122256-121122323:mpeak_10148|chr1_121107151_121129494_SRGAP2D_NR_+|	13.3365	3.29574	1.50502	-2.18983	0.0285363	NA	12.3295	46.889	37.6847	10.3685	24.2249	11.051	0	0	2.55489	2.3041	2.10652	10.5248	1264.28	305.613	1.08611	-2.5474	3.63351	SRGAP2D	-	-
chr19:52840646-52840907:mpeak_96448|chr19_52839497_52868950_ZNF610_NM_+|	3.74574	4.46837	2.05938	-2.16977	0.0300245	NA	4.62357	10.7175	5.10979	4.6082	6.31955	0	0	0	0.638724	3.45615	4.21303	5.26238	1067.28	126.757	0.904164	-4.33956	5.24373	ZNF610	-	-
chr17:62491785-62491896:mpeak_85460|chr17_62474105_62493184_POLG2_NM_-|	30.7061	3.33022	1.42516	-2.33674	0.0194527	0.146303	83.2243	139.327	29.3813	9.21641	23.1717	12.1035	1.54119	1.33969	22.3553	5.76025	7.37281	33.6792	998.3	95.0425	2.50144	-0.891393	3.39283	POLG2	-	-
chr3:61660916-61660976:mpeak_128575|chr3_61547242_62278835_PTPRG_NM_+|	20.3329	3.50367	1.56947	-2.2324	0.0255888	NA	30.8238	99.1368	25.5489	11.5205	27.3847	2.63119	0	1.33969	9.58085	14.9767	2.10652	18.9446	949.34	115.29	1.90455	-1.72206	3.62662	PTPRG	-	-
chr14:35252959-35253068:mpeak_56656|chr14_35222910_35344853_BAZ1A_NM_-|	58.4915	1.89424	0.965103	-1.96274	0.0496765	0.236288	178.778	107.175	105.389	85.2518	61.089	41.5728	6.16476	5.35875	31.2975	16.1287	24.2249	39.4679	913.904	235.417	1.05836	-0.89846	1.95682	BAZ1A	-	-
chr14:45666113-45666211:mpeak_57300|chr14_45605141_45669072_FANCM_NM_+|	8.29812	3.60115	1.68545	-2.13661	0.0326294	NA	18.4943	26.7937	14.0519	3.45615	14.7456	0	0	2.67937	1.91617	6.9123	4.21303	6.31486	860.833	156.55	1.70492	-1.92411	3.62903	FANCM	-	-
chr14:45667240-45667448:mpeak_57301|chr14_45605141_45669072_FANCM_NM_+|	9.09907	2.83212	1.26473	-2.23931	0.0251359	NA	20.0355	26.7937	11.497	4.6082	15.7989	8.41981	0	2.67937	1.91617	6.9123	4.21303	6.31486	846.127	165.29	1.01673	-1.92411	2.94084	FANCM	-	-
chr2:136268281-136268345:mpeak_106547|chr2_135958010_136288806_ZRANB3_NM_-|	34.1255	1.9051	0.897541	-2.12258	0.033789	0.191342	112.507	33.4922	54.2915	62.2107	24.2249	41.0466	9.24714	6.69843	8.30341	19.5849	13.6924	24.207	825.975	221.769	0.651798	-1.24524	1.89704	ZRANB3	-	-
chr14:45636565-45636626:mpeak_57288|chr14_45605141_45669072_FANCM_NM_+|	9.0641	2.67463	1.21397	-2.20322	0.0275793	NA	13.8707	21.435	19.8004	12.6726	13.6924	5.26238	0	2.67937	1.91617	6.9123	4.21303	6.31486	799.414	181.347	0.801042	-1.92411	2.72515	FANCM	-	-
chr2:14784890-14784952:mpeak_98185|chr2_14775214_14789439_LOC653602_NM_+|	9.73099	4.15052	1.89255	-2.19309	0.0283012	NA	18.4943	34.8319	8.94213	13.8246	13.6924	4.2099	0	2.67937	0	1.15205	1.05326	17.8921	774.662	157.866	0.972791	-2.90704	3.87983	LOC653602	-	-
chr1:45954910-45955094:mpeak_4388|chr1_45811230_45956840_TESK2_NM_-|	12.6056	2.46185	1.12148	-2.19517	0.0281512	NA	9.24714	44.2097	21.0779	11.5205	17.9054	8.94605	3.08238	4.01906	3.19362	8.06436	6.31955	13.6822	723.985	136.72	0.95786	-1.44688	2.40474	TESK2	-	-
chr5:86636809-86637051:mpeak_152512|chr5_86564069_86686616_RASA1_NM_+|	28.4209	2.81623	1.40766	-2.00065	0.0454301	0.224784	55.4828	79.0415	14.0519	38.0177	43.1836	2.63119	3.08238	2.67937	15.3294	26.4972	13.6924	47.3614	704.449	95.7528	0.825623	-2.05349	2.87911	RASA1	-	-
chr4:57412-57563:mpeak_137767|chr4_53178_86036_ZNF595_NM_+|	12.4975	3.59823	1.67667	-2.14606	0.0318684	NA	18.4943	21.435	0	3.45615	14.7456	17.8921	0	4.01906	1.91617	19.5849	17.9054	30.5218	672.75	53.0698	0.145693	-3.51841	3.66411	ZNF595	-	-
chr7:98617361-98617484:mpeak_175387|chr7_98610787_98633039_LOC101927550_NR_+|	3.51087	4.88639	2.17155	-2.25019	0.024437	NA	10.7883	12.0572	1.91617	1.15205	4.21303	0	0	0	1.27745	2.3041	3.15978	5.26238	646.124	75.0274	2.20644	-3.06981	5.27625	LOC101927550	-	-
chr5:43495574-43495675:mpeak_149726|chr5_43487213_43515273_C5orf34_NM_-|	5.58736	4.56755	1.99785	-2.28624	0.0222405	NA	20.0355	9.37781	5.74851	3.45615	4.21303	3.68367	0	0	1.91617	2.3041	0	16.3134	611.668	40.653	1.63095	-3.28036	4.91131	C5orf34	-	-
chr12:114364878-114365051:mpeak_48650|chr12_114255991_114404176_RBM19_NM_-|	36.2053	2.18029	0.992712	-2.19629	0.0280711	0.173732	89.389	84.4003	33.2136	57.6025	43.1836	8.94605	10.7883	14.7366	9.58085	24.1931	23.1717	35.2579	589.655	132.811	0.915664	-1.23483	2.1505	RBM19	-	-
chr4:57211043-57211176:mpeak_141068|chr4_57204957_57253674_AASDH_NM_-|	27.0802	2.56682	1.21044	-2.12057	0.0339583	0.191599	33.9062	38.8509	26.8264	32.2574	70.5683	17.8921	0	2.67937	8.94213	23.041	12.6391	57.3599	571.26	129.748	-0.277661	-3.00106	2.72339	AASDH	-	-
chr5:86670649-86670711:mpeak_152519|chr5_86564069_86686616_RASA1_NM_+|	26.8415	2.25947	0.990848	-2.28034	0.0225876	0.155907	30.8238	48.2287	39.6009	31.1054	30.5445	33.153	3.08238	2.67937	15.3294	26.4972	13.6924	47.3614	562.575	108.283	0.323751	-2.05349	2.37724	RASA1	-	-
chr1:121119884-121120016:mpeak_10146|chr1_121107151_121129494_SRGAP2D_NR_+|	6.17493	3.73197	1.8278	-2.04178	0.0411733	NA	9.24714	14.7366	17.8843	0	8.42607	6.31486	0	0	2.55489	2.3041	2.10652	10.5248	546.245	148.047	1.50602	-2.5474	4.05342	SRGAP2D	-	-
chr13:41896138-41896442:mpeak_52553|chr13_41885340_41949540_NAA16_NM_+|	49.6647	1.43662	0.72413	-1.98393	0.0472636	0.22942	121.754	83.0606	62.5949	58.7546	71.6216	51.0451	10.7883	17.4159	22.994	32.2574	20.0119	43.6778	522.301	189.085	0.559707	-0.906143	1.46585	NAA16	-	-
chr12:114397851-114397945:mpeak_48659|chr12_114255991_114404176_RBM19_NM_-|	35.1387	1.80964	0.65432	-2.76568	0.00568038	0.0882574	64.73	48.2287	66.4273	40.3218	41.0771	43.1515	10.7883	14.7366	9.58085	24.1931	23.1717	35.2579	510.988	150.746	0.526337	-1.23483	1.76117	RBM19	-	-
chr6:12015680-12015915:mpeak_159579|chr6_12012723_12163515_HIVEP1_NM_+|	42.7397	1.90985	0.939355	-2.03315	0.042037	0.21533	78.6007	46.889	60.04	52.9943	41.0771	60.5174	4.62357	6.69843	28.7426	31.1054	31.5978	69.9897	463.077	116.501	0.263215	-1.72769	1.99091	HIVEP1	-	-
chrX:68893007-68893066:mpeak_199662|chrX_68835910_69255207_EDA_NM_+|	5.17221	5.01968	1.61972	-3.09911	0.00194103	NA	9.24714	12.0572	3.83234	0	3.15978	1.57871	0	1.33969	2.55489	4.6082	10.5326	13.156	430.284	25.1186	2.40729	-2.8611	5.26839	EDA	-	-
chr14:24631162-24631229:mpeak_56128|chr14_24630421_24635330_IRF9_NM_+|	6.78343	3.06501	1.47639	-2.07601	0.037893	NA	15.4119	13.3969	12.1357	0	4.21303	5.78862	3.08238	1.33969	5.10979	4.6082	2.10652	14.2084	429.555	71.7028	2.03343	-1.13427	3.1677	IRF9	-	-
chr4:20273844-20273967:mpeak_139262|chr4_20255186_20620390_SLIT2_NM_+|	6.5374	6.10202	2.24072	-2.72324	0.00646454	NA	24.659	18.7556	14.0519	1.15205	0	0	1.54119	0	7.66468	1.15205	0	9.47228	416.159	21.687	5.64045	-0.206746	5.84719	SLIT2	-	-
chr1:171902805-171903014:mpeak_14277|chr1_171810617_172376911_DNM3_NM_+|	4.69069	6.65565	2.40771	-2.76431	0.00570433	NA	3.08238	30.8128	4.47107	0	2.10652	0	3.08238	0	0	1.15205	5.26629	6.31486	414.898	49.6305	4.18691	-2.04648	6.23338	DNM3	-	-
chr3:113081517-113081590:mpeak_130885|chr3_113010595_113160361_CFAP44_NM_-|	7.78913	3.27237	1.47677	-2.2159	0.0266986	NA	29.2826	16.0762	8.30341	0	7.37281	0.526238	3.08238	6.69843	3.83234	4.6082	6.31955	7.36733	394.194	64.7637	2.76416	-0.426455	3.19061	CFAP44	-	-
chr10:18853633-18853979:mpeak_21242|chr10_18835074_18940566_NSUN6_NM_-|	9.59581	4.33122	1.98364	-2.18347	0.0290011	NA	18.4943	20.0953	1.27745	4.6082	10.5326	0	6.16476	0	1.27745	6.9123	6.31955	39.4679	357.125	43.0955	1.39676	-2.82399	4.22075	NSUN6	-	-
chr14:58905429-58905774:mpeak_58556|chr14_58894102_59014498_KIAA0586_NM_+|	22.2519	2.70208	1.22461	-2.20649	0.02735	0.171333	38.5297	87.0796	9.58085	9.21641	14.7456	8.94605	12.3295	5.35875	20.4392	9.21641	12.6391	38.9416	354.575	54.1277	2.03848	-0.673174	2.71165	KIAA0586	-	-
chr1:45955791-45955850:mpeak_4389|chr1_45811230_45956840_TESK2_NM_-|	7.61155	2.67061	1.15617	-2.30988	0.0208948	NA	10.7883	12.0572	13.4132	4.6082	9.47933	2.63119	3.08238	4.01906	3.19362	8.06436	6.31955	13.6822	352.195	59.5691	1.11686	-1.44688	2.56374	TESK2	-	-
chr3:44816378-44816437:mpeak_127283|chr3_44803208_44894164_KIF15_NM_+|	18.869	2.48147	0.884362	-2.80594	0.00501695	NA	44.6945	21.435	30.6587	21.889	5.26629	12.6297	9.24714	10.7175	7.66468	19.5849	21.0652	21.5758	350.31	63.9365	1.28261	-1.17131	2.45392	KIF15	-	-
chr2:100018722-100018816:mpeak_104566|chr2_100017815_100106480_REV1_NM_-|	7.0371	2.88104	1.2918	-2.23025	0.0257309	NA	3.08238	4.01906	8.94213	8.06436	7.37281	5.26238	1.54119	1.33969	1.91617	9.21641	12.6391	21.0495	334.447	48.245	-0.367604	-3.16093	2.79332	REV1	-	-
chr4:104101461-104101620:mpeak_143641|chr4_104027473_104119566_CENPE_NM_-|	7.46714	2.80182	1.30356	-2.14936	0.0316055	NA	10.7883	8.03812	3.19362	8.06436	10.5326	4.2099	0	1.33969	3.19362	14.9767	12.6391	12.6297	323.827	56.6693	-0.0506481	-3.15019	3.09954	CENPE	-	-
chr9:5092044-5092200:mpeak_189308|chr9_4985244_5126683_JAK2_NM_+|	42.2667	2.37925	0.906264	-2.62534	0.00865635	0.105167	137.166	44.2097	65.1498	42.6259	11.5858	15.2609	36.9886	20.0953	21.0779	47.2341	35.8108	29.9956	315.404	61.4582	1.82722	-0.532305	2.35952	JAK2	-	-
chr4:104028875-104028966:mpeak_143612|chr4_104027473_104119566_CENPE_NM_-|	6.5934	3.55189	1.55443	-2.28502	0.0223119	NA	9.24714	9.37781	2.55489	0	8.42607	4.73614	0	1.33969	3.19362	14.9767	12.6391	12.6297	311.47	49.0572	0.68629	-3.15019	3.83648	CENPE	-	-
chr9:88929545-88930004:mpeak_192218|chr9_88903659_88969402_ZCCHC6_NM_-|	26.5325	2.63188	1.03362	-2.54629	0.0108876	0.11518	23.1178	54.9272	17.2455	24.1931	28.438	9.99852	4.62357	13.3969	13.4132	25.3451	29.4912	74.1996	303.148	48.5365	0.605489	-2.03739	2.64288	ZCCHC6	-	-
chr18:21727166-21727296:mpeak_88928|chr18_21718919_21741479_CABYR_NM_+|	28.2822	2.59181	1.1967	-2.1658	0.0303264	0.180932	32.365	152.724	47.2655	6.9123	3.15978	0.526238	26.2002	32.1525	19.1617	5.76025	4.21303	8.94605	299.757	56.0185	4.45442	2.0346	2.41982	CABYR	-	-
chr3:61611442-61611495:mpeak_128570|chr3_61547242_62278835_PTPRG_NM_+|	8.48839	4.62596	2.02303	-2.28664	0.0222167	NA	15.4119	26.7937	6.38724	0	6.31955	0	0	1.33969	9.58085	14.9767	2.10652	18.9446	296.645	52.6224	2.94285	-1.72206	4.66491	PTPRG	-	-
chr12:114403913-114404109:mpeak_48660|chr12_114255991_114404176_RBM19_NM_-|	22.4519	2.33869	1.05391	-2.21906	0.0264825	0.16846	46.2357	44.2097	12.7745	31.1054	4.21303	13.156	10.7883	14.7366	9.58085	24.1931	23.1717	35.2579	294.026	58.6695	1.09043	-1.23483	2.32526	RBM19	-	-
chr2:136268963-136269113:mpeak_106549|chr2_135958010_136288806_ZRANB3_NM_-|	15.2176	2.54167	0.859154	-2.95834	0.003093	NA	27.7414	20.0953	22.994	12.6726	11.5858	5.78862	9.24714	6.69843	8.30341	19.5849	13.6924	24.207	292.098	52.2701	1.23715	-1.24524	2.48239	ZRANB3	-	-
chr3:101477143-101477273:mpeak_130414|chr3_101443436_101483690_CEP97_NM_+|	25.5157	2.31475	1.15003	-2.01276	0.0441397	0.221384	12.3295	34.8319	22.994	24.1931	15.7989	34.7317	1.54119	4.01906	18.523	28.8013	27.3847	81.0407	291.304	54.4527	-0.0910105	-2.51046	2.41945	CEP97	-	-
chr4:73245-73378:mpeak_137774|chr4_53178_86036_ZNF595_NM_+|	11.3932	2.80237	1.19154	-2.35189	0.0186781	NA	6.16476	12.0572	5.74851	10.3685	21.0652	7.36733	0	4.01906	1.91617	19.5849	17.9054	30.5218	269.245	57.0501	-0.694835	-3.51841	2.82358	ZNF595	-	-
chr15:63932941-63933313:mpeak_66418|chr15_63901465_64126147_HERC1_NM_-|	20.5156	3.10182	1.28641	-2.41122	0.0158991	NA	35.4474	10.7175	30.02	11.5205	12.6391	7.89357	6.16476	1.33969	21.7166	21.889	12.6391	74.1996	260.719	29.4803	1.24904	-1.89564	3.14468	HERC1	-	-
chr15:32917724-32918390:mpeak_63565|chr15_32907344_32928457_ARHGAP11A_NM_+|	62.6234	1.71675	0.686278	-2.50153	0.0123657	0.121301	35.4474	56.2668	40.8783	72.5792	120.071	59.4649	24.659	10.7175	15.9681	99.0764	91.6335	124.718	258.24	79.928	-0.927086	-2.61903	1.69194	ARHGAP11A	-	-
chr3:61701315-61701424:mpeak_128585|chr3_61547242_62278835_PTPRG_NM_+|	7.61293	5.44131	2.1163	-2.57114	0.0101363	NA	4.62357	32.1525	4.47107	0	3.15978	0	0	1.33969	9.58085	14.9767	2.10652	18.9446	251.801	26.3112	3.7064	-1.72206	5.42846	PTPRG	-	-
chr6:90546196-90546484:mpeak_165073|chr6_90539618_90583521_CASP8AP2_NM_+|	12.9062	2.82501	1.34354	-2.10266	0.0354957	NA	10.7883	42.87	22.3553	10.3685	11.5858	10.5248	0	0	10.2196	10.3685	11.5858	14.2084	247.935	89.8136	1.22675	-1.82317	3.04992	CASP8AP2	-	-
chr7:63802571-63802731:mpeak_173225|chr7_63774250_63808467_ZNF736_NM_+|	17.3567	2.90835	1.07329	-2.70975	0.00673337	NA	9.24714	28.1334	7.66468	9.21641	7.37281	16.3134	3.08238	5.35875	10.2196	25.3451	31.5978	54.7288	241.391	29.4637	0.453173	-2.58119	3.03436	ZNF736	-	-
chr9:6829353-6829458:mpeak_189479|chr9_6757640_7013787_KDM4C_NR_+mpeak_189479|chr9_6720862_7174552_KDM4C_NM_+||	10.7695	3.0358	1.51724	-2.00087	0.0454069	NA	6.16476	24.1144	11.497	8.06436	8.42607	0	9.24714	4.01906	4.47107	6.9123	11.5858	34.7317	235.528	46.4695	1.34105	-1.58545	2.9265	KDM4C	-	-
chr1:171970044-171970104:mpeak_14283|chr1_171810617_172376911_DNM3_NM_+|	2.4924	7.14761	2.89513	-2.46884	0.0135553	NA	7.70595	0	6.38724	0	0	0	3.08238	0	0	1.15205	5.26629	6.31486	228.609	#DIV/0!	Inf	-2.04648	Inf	DNM3	-	-
chrX:149771913-149772054:mpeak_201742|chrX_149737046_149839900_MTM1_NM_+|	3.35525	5.36771	2.54261	-2.11111	0.0347632	NA	6.16476	6.69843	8.94213	0	2.10652	0	0	0	3.19362	0	2.10652	11.051	227.593	32.02	3.37175	-2.04262	5.41437	MTM1	-	-
chr2:134273323-134273375:mpeak_106359|chr2_133430878_134326031_NCKAP5_NM_-|	4.34564	4.01289	1.79677	-2.23339	0.0255235	NA	3.08238	10.7175	3.83234	2.3041	3.15978	0	0	4.01906	1.27745	6.9123	4.21303	12.6297	221.935	34.5014	1.69022	-2.16512	3.85534	NCKAP5	-	-
chr4:129076905-129076970:mpeak_144898|chr4_128982420_129131010_LARP1B_NM_+|	8.46536	3.73867	1.47496	-2.53476	0.0112523	NA	21.5767	20.0953	8.30341	4.6082	0	0	3.08238	8.03812	11.497	8.06436	7.37281	8.94605	220.959	56.6972	3.43894	-0.108447	3.54739	LARP1B	-	-
chr4:85669-85874:mpeak_137779|chr4_53178_86036_ZNF595_NM_+|	10.2764	2.90859	1.17988	-2.46516	0.0136952	NA	6.16476	4.01906	8.94213	14.9767	7.37281	7.89357	0	4.01906	1.91617	19.5849	17.9054	30.5218	214.83	44.4672	-0.661072	-3.51841	2.85734	ZNF595	-	-
chr22:31330067-31330189:mpeak_122485|chr22_31322858_31364483_MORC2_NM_-|	116.822	2.4262	1.18818	-2.04195	0.0411567	0.213081	206.519	137.988	74.0919	96.7723	92.6868	33.153	24.659	17.4159	153.932	102.533	95.8465	366.262	213.563	39.4254	0.911038	-1.52643	2.43746	MORC2	-	-
chr10:102261191-102261395:mpeak_27185|chr10_102247552_102279595_SEC31B_NM_-|	4.27696	4.98172	2.16637	-2.29957	0.0214724	NA	0	10.7175	6.38724	0	1.05326	0	1.54119	8.03812	2.55489	5.76025	13.6924	1.57871	211.444	15.0241	4.02146	-0.793461	4.81492	SEC31B	-	-
chr1:45954090-45954155:mpeak_4387|chr1_45811230_45956840_TESK2_NM_-|	5.18708	4.62976	1.60441	-2.88565	0.00390603	NA	7.70595	12.0572	1.91617	1.15205	0	1.05248	3.08238	4.01906	3.19362	8.06436	6.31955	13.6822	210.58	11.7822	3.29778	-1.44688	4.74465	TESK2	-	-
chr18:12692343-12692484:mpeak_88271|chr18_12662168_12702776_CEP76_NR_-mpeak_88271|chr18_12673502_12702776_CEP76_NM_-||	5.87165	4.18671	1.93731	-2.1611	0.0306879	NA	6.16476	12.0572	1.27745	2.3041	5.26629	2.63119	0	0	3.19362	2.3041	4.21303	31.048	203.525	27.157	0.934635	-3.55613	4.49077	CEP76	-	-
chr4:159152907-159152979:mpeak_146571|chr4_159131400_159174595_TMEM144_NM_+|	33.0833	2.51456	1.22111	-2.05923	0.0394718	0.208543	60.1064	129.95	4.47107	8.06436	10.5326	8.94605	16.9531	46.889	32.5749	25.3451	23.1717	29.9956	201.756	35.0811	2.82021	0.296368	2.52385	TMEM144	-	-
chr1:117545035-117545100:mpeak_9686|chr1_117544371_117578777_CD101_NM_+|	4.81259	4.68662	1.69172	-2.77034	0.00559982	NA	10.7883	5.35875	5.10979	1.15205	1.05326	0	1.54119	5.35875	3.83234	4.6082	5.26629	13.6822	198.065	14.0426	3.26888	-1.13418	4.40306	CD101	-	-
chr15:63482491-63482791:mpeak_66322|chr15_63481727_63555725_RAB8B_NM_+|	15.9288	3.64768	1.7911	-2.03655	0.0416949	NA	9.24714	36.1715	1.27745	5.76025	10.5326	0	3.08238	4.01906	16.6068	14.9767	15.7989	73.6733	196.961	23.3983	1.51906	-2.13934	3.6584	RAB8B	-	-
chr16:15109975-15110049:mpeak_71636|chr16_15068591_15232735_PDXDC1_NM_+|	11.257	2.16345	1.03708	-2.08609	0.0369704	NA	32.365	10.7175	14.6906	6.9123	3.15978	4.73614	12.3295	12.0572	5.10979	10.3685	12.6391	9.99852	195.864	44.8651	1.964	-0.162189	2.12619	PDXDC1	-	-
chr1:171929721-171929822:mpeak_14279|chr1_171810617_172376911_DNM3_NM_+|	2.82609	7.55572	2.50529	-3.0159	0.00256217	NA	6.16476	9.37781	2.55489	0	0	0	3.08238	0	0	1.15205	5.26629	6.31486	195.709	#DIV/0!	Inf	-2.04648	Inf	DNM3	-	-
chr10:18852534-18852788:mpeak_21240|chr10_18835074_18940566_NSUN6_NM_-|	7.45449	4.47862	2.01253	-2.22537	0.0260564	NA	7.70595	13.3969	0.638724	2.3041	5.26629	0	6.16476	0	1.27745	6.9123	6.31955	39.4679	194.759	21.5477	1.52201	-2.82399	4.34601	NSUN6	-	-
chr17:65631629-65631932:mpeak_85903|chr17_65373396_65688687_PITPNC1_NM_+|	39.5015	2.57378	1.1511	-2.23594	0.0253558	0.164927	50.8593	88.4193	37.6847	14.9767	14.7456	17.8921	7.70595	14.7366	72.1758	25.3451	30.5445	98.9328	187.029	30.7542	1.89398	-0.710423	2.6044	PITPNC1	-	-
chr17:62490641-62490788:mpeak_85458|chr17_62474105_62493184_POLG2_NM_-|	10.343	4.0375	1.73167	-2.33157	0.0197232	NA	16.9531	17.4159	12.1357	3.45615	2.10652	0	1.54119	1.33969	22.3553	5.76025	7.37281	33.6792	184.278	17.8244	3.06353	-0.891393	3.95492	POLG2	-	-
chr4:20433631-20433696:mpeak_139282|chr4_20255186_20620390_SLIT2_NM_+|	3.79858	4.86736	2.46415	-1.97527	0.048238	NA	10.7883	10.7175	3.19362	0	1.05326	0	1.54119	0	7.66468	1.15205	0	9.47228	178.867	19.8273	4.55155	-0.206746	4.75829	SLIT2	-	-
chr3:160726434-160726776:mpeak_135119|chr3_160473995_160786598_PPM1L_NM_+|	10.568	3.98711	1.77124	-2.25103	0.0243834	NA	20.0355	26.7937	1.27745	2.3041	3.15978	0	13.8707	1.33969	12.1357	19.5849	3.15978	23.1545	175.917	17.8562	3.13824	-0.747129	3.88537	PPM1L	-	-
chr7:63802163-63802313:mpeak_173224|chr7_63774250_63808467_ZNF736_NM_+|	16.2871	2.42339	1.03761	-2.33554	0.019515	NA	6.16476	20.0953	5.74851	11.5205	10.5326	11.051	3.08238	5.35875	10.2196	25.3451	31.5978	54.7288	171.529	29.6441	-0.0485514	-2.58119	2.53264	ZNF736	-	-
chr16:12142432-12142485:mpeak_71386|chr16_12070590_12662362_SNX29_NM_+|	8.96993	3.17062	1.51142	-2.09778	0.0359247	NA	33.9062	2.67937	5.74851	1.15205	1.05326	3.68367	9.24714	2.67937	12.7745	5.76025	15.7989	13.156	171.386	16.9637	2.84573	-0.490994	3.33672	SNX29	-	-
chr19:33572349-33572550:mpeak_93948|chr19_33571785_33621035_GPATCH1_NM_+|	12.2676	3.45909	1.41185	-2.45004	0.0142841	NA	3.08238	14.7366	10.2196	8.06436	8.42607	2.63119	0	1.33969	9.58085	26.4972	14.7456	47.8877	171.167	21.4535	0.552205	-3.02887	3.58108	GPATCH1	-	-
chr9:6820217-6820271:mpeak_189476|chr9_6757640_7013787_KDM4C_NR_+mpeak_189476|chr9_6720862_7174552_KDM4C_NM_+||	9.71704	2.62771	1.3082	-2.00864	0.0445755	NA	7.70595	16.0762	6.38724	2.3041	10.5326	2.63119	9.24714	4.01906	4.47107	6.9123	11.5858	34.7317	170.091	29.0586	0.963812	-1.58545	2.54926	KDM4C	-	-
chr10:128798531-128798585:mpeak_29235|chr10_128593977_129249595_DOCK1_NM_+|	2.44553	5.40717	2.72509	-1.98422	0.0472315	NA	0	1.33969	9.58085	0	0	0	0	1.33969	5.10979	4.6082	1.05326	6.31486	169.324	#DIV/0!	Inf	-0.892931	Inf	DOCK1	-	-
chr4:20342485-20342657:mpeak_139273|chr4_20255186_20620390_SLIT2_NM_+|	3.59041	5.78841	2.66851	-2.16915	0.030071	NA	4.62357	16.0762	2.55489	0	0	0	1.54119	0	7.66468	1.15205	0	9.47228	168.405	#DIV/0!	Inf	-0.206746	Inf	SLIT2	-	-
chr11:116955823-116955900:mpeak_37444|chr11_116716345_116969131_SIK3_NM_-|	37.2601	2.11152	0.875804	-2.41095	0.0159111	0.134983	29.2826	101.816	24.2715	18.4328	24.2249	13.156	27.7414	33.4922	31.2975	57.6025	35.8108	49.9926	167.912	38.9201	1.47702	-0.632096	2.10911	SIK3	-	-
chr9:88969177-88969234:mpeak_192238|chr9_88903659_88969402_ZCCHC6_NM_-|	21.729	2.11126	1.00084	-2.10949	0.0349025	0.194743	27.7414	13.3969	11.497	9.21641	15.7989	22.6282	4.62357	13.3969	13.4132	25.3451	29.4912	74.1996	167.449	36.9227	0.143751	-2.03739	2.18114	ZCCHC6	-	-
chr3:73046167-73046227:mpeak_129537|chr3_73046118_73114547_PPP4R2_NM_+|	8.53158	2.82908	1.42229	-1.9891	0.04669	NA	13.8707	1.33969	5.74851	4.6082	5.26629	2.63119	1.54119	2.67937	8.30341	6.9123	15.7989	33.6792	167.35	22.177	0.744979	-2.17076	2.91574	PPP4R2	-	-
chr3:27493926-27494030:mpeak_126081|chr3_27418336_27525911_SLC4A7_NM_-|	108.087	1.38365	0.698164	-1.98184	0.0474973	0.230141	157.201	124.591	79.2017	92.1641	97.9531	84.7243	73.9771	52.2478	94.5311	102.533	100.06	237.86	163.526	62.3999	0.393375	-0.996531	1.38991	SLC4A7	-	-
chr16:77844514-77844564:mpeak_76128|chr16_77822460_78011493_VAT1L_NM_+|	3.85125	6.97015	2.38214	-2.92601	0.00343343	NA	6.16476	1.33969	6.38724	0	0	0	0	1.33969	4.47107	2.3041	2.10652	22.102	159.379	#DIV/0!	Inf	-2.18988	Inf	VAT1L	-	-
chr15:66064334-66064394:mpeak_66793|chr15_65954325_66084631_DENND4A_NM_-|	11.3999	4.324	1.26177	-3.42694	0.000610423	NA	7.70595	28.1334	15.3294	2.3041	2.10652	0	9.24714	10.7175	13.4132	11.5205	14.7456	21.5758	153.302	13.8287	3.53621	-0.519384	4.05559	DENND4A	-	-
chr1:235485768-235486035:mpeak_19116|chr1_235331967_235491532_ARID4B_NM_-|	31.7106	2.46019	1.11377	-2.20889	0.0271826	0.170764	44.6945	42.87	7.66468	11.5205	32.651	4.73614	20.0355	29.4731	12.7745	65.6669	47.3966	61.0436	152.897	28.0906	0.961343	-1.48306	2.44441	ARID4B	-	-
chr10:93758184-93758237:mpeak_26237|chr10_93683735_93788546_BTAF1_NM_+|	10.6326	2.96314	1.4974	-1.97885	0.0478329	NA	4.62357	16.0762	5.74851	6.9123	7.37281	0	7.70595	4.01906	5.74851	17.2808	8.42607	43.6778	151.362	30.8825	0.888663	-1.98944	2.87811	BTAF1	-	-
chr12:107728359-107728634:mpeak_47877|chr12_107712196_108051285_BTBD11_NM_+|	14.7676	3.44902	1.36183	-2.53264	0.0113207	NA	10.7883	52.2478	10.2196	1.15205	3.15978	2.10495	10.7883	12.0572	26.8264	5.76025	9.47933	32.6268	147.479	13.4056	3.51302	0.0534184	3.4596	BTBD11	-	-
chr9:96044142-96044237:mpeak_192701|chr9_95947211_96082648_WNK2_NM_+|	4.57819	4.22233	2.04924	-2.06044	0.0393566	NA	0	12.0572	5.10979	1.15205	0	0	3.08238	2.67937	12.1357	3.45615	6.31955	8.94605	143.877	18.4606	3.89736	-0.0649572	3.96232	WNK2	-	-
chr14:50269189-50269301:mpeak_57475|chr14_50251431_50319791_NEMF_NM_-|	43.5453	1.71997	0.759043	-2.26598	0.0234528	0.15874	46.2357	37.5112	35.1298	35.7136	45.2901	14.2084	24.659	18.7556	40.8783	78.3395	73.7281	72.0946	141.028	42.4747	0.320249	-1.41106	1.73131	NEMF	-	-
chr9:95301736-95301812:mpeak_192619|chr9_95087749_95375300_CENPP_NM_+|	49.1195	1.97446	0.944908	-2.08958	0.0366553	0.200126	98.6362	24.1144	91.9762	34.5615	8.42607	15.2609	40.0709	49.5684	64.5111	44.93	36.8641	80.5144	139.297	35.8875	1.88221	-0.0743993	1.95661	CENPP	-	-
chr2:160043749-160043815:mpeak_108082|chr2_159825145_160086088_TANC1_NM_+|	47.1639	2.28469	1.13294	-2.0166	0.0437371	0.220178	44.6945	88.4193	25.5489	19.5849	40.0238	5.26238	18.4943	37.5112	58.7626	46.082	41.0771	140.506	138.246	28.4941	1.29032	-0.988189	2.27851	TANC1	-	-
chr21:38852900-38853134:mpeak_120205|chr21_38739858_38884213_DYRK1A_NM_+|	71.6116	1.63659	0.695279	-2.35386	0.0185798	0.143419	106.342	62.9653	35.1298	51.8423	58.9825	43.1515	32.365	56.2668	59.4013	105.989	132.711	114.194	138.102	43.6326	0.408949	-1.25331	1.66226	DYRK1A	-	-
chr5:643737-643792:mpeak_147856|chr5_612404_653102_CEP72_NM_+|	7.39787	3.90183	1.84826	-2.11108	0.0347656	NA	0	5.35875	13.4132	1.15205	2.10652	0	3.08238	2.67937	14.6906	5.76025	14.7456	25.7857	137.675	10.5588	2.52627	-1.17848	3.70475	CEP72	-	-
chr16:89547477-89547635:mpeak_77217|chr16_89353521_89556969_ANKRD11_NR_-mpeak_77217|chr16_89335071_89556969_ANKRD11_NM_-||	54.9445	2.53884	1.01433	-2.50297	0.0123155	0.121143	20.0355	49.5684	19.1617	19.5849	46.3434	28.4169	13.8707	13.3969	37.6847	81.7956	68.4618	261.014	136.663	22.9399	-0.0879472	-2.66264	2.57469	ANKRD11	-	-
chr9:88915748-88915810:mpeak_192212|chr9_88903659_88969402_ZCCHC6_NM_-|	19.8402	2.34517	0.978779	-2.39602	0.0165742	NA	15.4119	13.3969	14.0519	18.4328	8.42607	7.89357	4.62357	13.3969	13.4132	25.3451	29.4912	74.1996	136.353	26.9324	0.30254	-2.03739	2.33993	ZCCHC6	-	-
chr2:73700903-73701059:mpeak_102962|chr2_73612885_73836694_ALMS1_NM_+|	10.8666	2.8875	1.24183	-2.32521	0.0200609	NA	4.62357	20.0953	6.38724	2.3041	7.37281	2.10495	4.62357	6.69843	11.497	29.9533	9.47933	25.2594	136.317	18.2122	1.40063	-1.50335	2.90398	ALMS1	-	-
chr18:72721451-72721501:mpeak_90752|chr18_72342918_72775105_ZNF407_NM_+|	9.18811	4.07583	2.01472	-2.02303	0.0430705	NA	12.3295	10.7175	0	2.3041	1.05326	0	1.54119	4.01906	19.8004	6.9123	11.5858	39.9941	136.315	8.60976	2.77918	-1.20565	3.98483	ZNF407	-	-
chr10:24578803-24578913:mpeak_21794|chr10_23983674_24834755_KIAA1217_NM_+|	22.0128	2.77789	1.32839	-2.09118	0.0365121	0.199629	1.54119	45.5493	5.10979	9.21641	15.7989	3.68367	7.70595	16.0762	14.6906	36.8656	50.5564	57.3599	135.681	19.8222	0.863061	-1.91197	2.77503	KIAA1217	-	-
chr19:12543581-12543647:mpeak_92382|chr19_12542794_12551926_ZNF443_NM_-|	11.7189	2.24447	1.06597	-2.10557	0.035242	NA	1.54119	9.37781	7.66468	8.06436	4.21303	12.1035	4.62357	5.35875	3.83234	32.2574	25.2782	26.3119	134.521	29.0776	-0.391713	-2.60157	2.20986	ZNF443	-	-
chr19:40552416-40552495:mpeak_94844|chr19_40542533_40562115_ZNF780B_NM_-|	7.19663	3.02058	1.35005	-2.23739	0.0252611	NA	9.24714	6.69843	4.47107	3.45615	4.21303	0	6.16476	4.01906	5.10979	16.1287	17.9054	8.94605	133.498	26.7653	1.4126	-1.49074	2.90334	ZNF780B	-	-
chr2:201456569-201456761:mpeak_110767|chr2_201450730_201535351_AOX1_NM_+|	19.3221	4.64029	1.55751	-2.97931	0.00288901	NA	40.0709	37.5112	5.74851	1.15205	1.05326	1.57871	6.16476	4.01906	55.569	12.6726	25.2782	41.0466	126.733	4.79006	4.46085	-0.264752	4.72561	AOX1	-	-
chr2:153246473-153246616:mpeak_107746|chr2_153191750_153504309_FMNL2_NM_+|	16.345	2.10806	0.983858	-2.14265	0.0321412	NA	33.9062	8.03812	17.2455	9.21641	8.42607	3.15743	13.8707	20.0953	13.4132	16.1287	25.2782	27.3644	124.928	30.245	1.50877	-0.537553	2.04633	FMNL2	-	-
chr1:114290765-114290832:mpeak_9064|chr1_114240347_114301777_PHTF1_NM_-|	5.77409	3.70741	1.7634	-2.10242	0.0355165	NA	12.3295	4.01906	2.55489	0	3.15978	0	1.54119	4.01906	9.58085	5.76025	16.8521	9.47228	124.849	29.5447	2.58076	-1.08341	3.66417	PHTF1	-	-
chr21:34020778-34021074:mpeak_119710|chr21_34004111_34100351_SYNJ1_NM_-|	9.8289	4.18836	1.48259	-2.82503	0.00472764	NA	6.16476	25.454	8.30341	1.15205	2.10652	0	16.9531	4.01906	12.1357	6.9123	18.9587	15.7871	120.582	11.7333	3.61488	-0.331422	3.9463	SYNJ1	-	-
chr14:75517049-75517173:mpeak_60763|chr14_75483904_75518235_MLH3_NM_-|	10.1259	2.19678	1.06857	-2.05581	0.0398007	NA	9.24714	4.01906	6.38724	5.76025	6.31955	5.26238	4.62357	4.01906	7.66468	21.889	12.6391	33.6792	120.519	25.4257	0.180496	-2.06441	2.2449	MLH3	-	-
chr14:50097403-50097539:mpeak_57421|chr14_50092766_50101948_DNAAF2_NM_-|	17.4429	3.52334	1.51744	-2.32189	0.0202387	NA	9.24714	14.7366	7.66468	6.9123	11.5858	2.10495	3.08238	0	14.6906	34.5615	9.47933	95.2491	118.713	14.7915	0.61927	-2.97033	3.5896	DNAAF2	-	-
chr9:139442683-139442737:mpeak_197058|chr9_139442293_139443997_LINC01573_NR_+|	4.41122	4.47051	2.25166	-1.98543	0.0470967	NA	4.62357	6.69843	6.38724	0	2.10652	0	0	8.03812	1.91617	0	13.6924	9.47228	118.604	18.1873	3.07157	-1.21853	4.2901	LINC01573	-	-
chr5:112623725-112623785:mpeak_154096|chr5_112363179_112824527_MCC_NM_-|	18.7369	4.07179	1.87599	-2.17047	0.0299713	NA	4.62357	45.5493	2.55489	1.15205	7.37281	0	6.16476	5.35875	33.2136	17.2808	10.5326	91.0392	117.861	10.759	2.62882	-1.40963	4.03844	MCC	-	-
chr10:24814460-24814598:mpeak_21839|chr10_23983674_24834755_KIAA1217_NM_+|	20.7225	3.11565	1.494	-2.08545	0.0370286	NA	3.08238	26.7937	15.3294	2.3041	17.9054	0	7.70595	16.0762	14.6906	36.8656	50.5564	57.3599	117.5	20.9379	1.16146	-1.91197	3.07343	KIAA1217	-	-
chr11:1499181-1499284:mpeak_29766|chr11_1491718_1508009_MOB2_NM_-|	21.445	2.87362	1.05321	-2.72844	0.0063635	NA	23.1178	18.7556	25.5489	6.9123	11.5858	0.526238	12.3295	22.7747	22.994	32.2574	31.5978	48.9401	116.049	16.8663	1.82538	-0.957141	2.78252	MOB2	-	-
chr12:122803763-122803906:mpeak_49588|chr12_122757647_122907116_CLIP1_NM_-|	42.177	1.67079	0.849402	-1.96702	0.0491803	0.234995	66.2712	37.5112	26.1877	23.041	25.2782	19.997	23.1178	37.5112	53.6528	47.2341	36.8641	109.458	113.728	35.2954	0.927878	-0.760152	1.68803	CLIP1	-	-
chr2:205957216-205957353:mpeak_111314|chr2_205410515_206480179_PARD3B_NM_+|	10.2125	3.65791	1.59494	-2.29345	0.0218222	NA	15.4119	13.3969	4.47107	2.3041	3.15978	0	16.9531	12.0572	0.638724	11.5205	15.7989	26.8381	112.246	15.1333	2.60665	-0.869179	3.47583	PARD3B	-	-
chr9:129750997-129751136:mpeak_195877|chr9_129677052_129981018_RALGPS1_NM_+|	8.81833	4.21987	1.92641	-2.19053	0.0284857	NA	12.3295	14.7366	0.638724	0	3.15978	0	1.54119	5.35875	17.8843	8.06436	10.5326	31.5743	111.784	18.894	3.13224	-1.01744	4.14968	RALGPS1	-	-
chr18:56383528-56383645:mpeak_90348|chr18_56338617_56414636_MALT1_NM_+|	13.9519	3.07078	1.47409	-2.08318	0.0372352	NA	13.8707	30.8128	3.19362	6.9123	2.10652	0.526238	15.4119	14.7366	12.7745	14.9767	5.26629	46.8352	111.542	14.2298	2.32651	-0.644094	2.9706	MALT1	-	-
chr1:171462577-171462660:mpeak_14210|chr1_171454665_171560725_PRRC2C_NM_+|	195.233	2.01316	0.808439	-2.49019	0.0127677	0.122939	151.037	292.052	76.0081	76.0354	114.805	96.8278	97.095	131.289	243.992	273.036	285.433	505.189	109.89	27.0452	0.851596	-1.17102	2.02262	PRRC2C	-	-
chr8:121011812-121011863:mpeak_186889|chr8_120885894_121061814_DEPTOR_NM_+|	11.5603	3.34791	1.28923	-2.59683	0.00940895	NA	12.3295	10.7175	7.66468	3.45615	3.15978	1.05248	3.08238	2.67937	22.3553	19.5849	24.2249	28.4169	109.228	10.6171	2.00179	-1.36108	3.36287	DEPTOR	-	-
chr3:101061446-101061590:mpeak_130324|chr3_101044924_101232085_SENP7_NM_-|	18.9022	2.21893	1.00258	-2.21323	0.0268819	NA	9.24714	20.0953	5.10979	9.21641	14.7456	5.78862	7.70595	10.7175	13.4132	33.4095	31.5978	65.7798	108.216	22.7474	0.211676	-2.03846	2.25014	SENP7	-	-
chr17:64494879-64495071:mpeak_85702|chr17_64298925_64799990_PRKCA_NM_+|	14.3577	3.24798	1.44924	-2.24116	0.0250157	NA	16.9531	37.5112	4.47107	4.6082	1.05326	0.526238	6.16476	18.7556	30.6587	18.4328	6.31955	26.8381	106.039	11.9939	3.25166	0.107437	3.14422	PRKCA	-	-
chr3:53052870-53053023:mpeak_128172|chr3_52939292_53080089_SFMBT1_NM_-|	16.6189	3.0085	1.32816	-2.26516	0.023503	NA	12.3295	32.1525	10.8583	4.6082	6.31955	0	9.24714	12.0572	31.9362	17.2808	20.0119	42.6253	103.944	20.5106	2.34033	-0.585996	2.92633	SFMBT1	-	-
chr4:140381139-140381349:mpeak_145222|chr4_140374960_140393839_RAB33B_NM_+|	12.6541	2.37142	0.968599	-2.4483	0.0143533	NA	18.4943	12.0572	7.02596	4.6082	5.26629	3.15743	12.3295	13.3969	10.8583	17.2808	16.8521	30.5218	102.714	20.1562	1.52782	-0.821516	2.34933	RAB33B	-	-
chr1:206702492-206702551:mpeak_17148|chr1_206680862_206760157_RASSF5_NM_+|	20.9578	3.84317	1.40384	-2.73762	0.00618858	NA	16.9531	8.03812	11.497	2.3041	4.21303	4.73614	1.54119	4.01906	30.02	27.6492	23.1717	117.351	102.552	6.69153	1.69709	-2.24079	3.93787	RASSF5	-	-
chr11:57439479-57439545:mpeak_32726|chr11_57435473_57467337_ZDHHC5_NM_+|	38.8829	3.33192	1.3581	-2.45337	0.0141526	0.128425	63.1888	12.0572	13.4132	14.9767	6.31955	5.26238	7.70595	9.37781	69.6209	54.1464	42.1303	168.396	102.254	10.0345	1.73909	-1.61003	3.34912	ZDHHC5	-	-
chr17:64353956-64354078:mpeak_85674|chr17_64298925_64799990_PRKCA_NM_+|	14.3213	2.88087	1.39602	-2.06363	0.039053	NA	13.8707	30.8128	12.1357	5.76025	2.10652	0	6.16476	18.7556	30.6587	18.4328	6.31955	26.8381	102.231	22.8727	2.85254	0.107437	2.7451	PRKCA	-	-
chr17:78649942-78650176:mpeak_87150|chr17_78518624_78938061_RPTOR_NM_+|	12.1137	2.81562	1.35265	-2.08156	0.0373826	NA	12.3295	6.69843	2.55489	2.3041	9.47933	1.05248	6.16476	8.03812	7.02596	57.6025	17.9054	14.2084	101.668	14.3072	0.7497	-2.07935	2.82905	RPTOR	-	-
chr7:77398059-77398241:mpeak_174368|chr7_77325742_77407846_RSBN1L_NM_+|	30.3825	1.82646	0.702593	-2.59959	0.00933345	0.108663	32.365	28.1334	21.7166	10.3685	22.1184	11.5772	29.2826	22.7747	30.02	41.4738	53.7162	61.0436	100.168	28.204	0.899797	-0.92865	1.82845	RSBN1L	-	-
chr17:27250916-27251008:mpeak_80309|chr17_27233535_27278508_PHF12_NM_-|	20.3644	1.84027	0.885121	-2.07912	0.0376061	NA	23.1178	12.0572	26.1877	12.6726	10.5326	4.73614	20.0355	24.1144	17.2455	24.1931	22.1184	47.3614	99.9468	29.8286	1.13496	-0.609502	1.74447	PHF12	-	-
chr9:88913003-88913141:mpeak_192210|chr9_88903659_88969402_ZCCHC6_NM_-|	16.9641	3.50146	1.38425	-2.5295	0.0114225	NA	16.9531	6.69843	7.66468	2.3041	9.47933	0	4.62357	13.3969	13.4132	25.3451	29.4912	74.1996	99.6264	13.6978	1.41015	-2.03739	3.44754	ZCCHC6	-	-
chr12:44241634-44241691:mpeak_41605|chr12_44229663_44781808_TMEM117_NM_+|	10.9836	3.54321	1.59006	-2.22836	0.0258566	NA	9.24714	21.435	2.55489	2.3041	3.15978	0	7.70595	9.37781	16.6068	11.5205	5.26629	42.6253	98.6538	13.7949	2.60479	-0.818412	3.42321	TMEM117	-	-
chr17:29673283-29673348:mpeak_80716|chr17_29421944_29701030_NF1_NM_+|	22.7375	2.20434	1.01288	-2.17631	0.0295323	0.178314	13.8707	14.7366	16.6068	6.9123	12.6391	11.5772	9.24714	9.37781	27.4651	23.041	35.8108	91.5654	98.0994	20.6949	0.538529	-1.70644	2.24497	NF1	-	-
chr2:135675924-135675974:mpeak_106434|chr2_135625309_135676176_CCNT2-AS1_NR_-|	5.94806	3.5183	1.72599	-2.03842	0.0415081	NA	9.24714	9.37781	5.10979	0	2.10652	0	7.70595	10.7175	6.38724	2.3041	3.15978	15.2609	95.6634	30.4927	3.49407	0.259604	3.23446	CCNT2-AS1	-	-
chr12:120444278-120444437:mpeak_49140|chr12_120427647_120530803_CCDC64_NM_+|	4.31411	5.6167	2.46236	-2.28102	0.0225474	NA	0	10.7175	5.10979	1.15205	0	0	0	0	8.30341	8.06436	5.26629	13.156	95.306	13.0487	3.78014	-1.67349	5.45362	CCDC64	-	-
chr12:67007892-67008023:mpeak_44777|chr12_66743026_67072925_GRIP1_NM_-|	7.85184	3.97303	1.76846	-2.2466	0.0246654	NA	3.08238	16.0762	3.19362	0	0	2.10495	7.70595	1.33969	14.6906	14.9767	5.26629	25.7857	94.1691	13.7194	3.40856	-0.955437	4.364	GRIP1	-	-
chr8:82587149-82587415:mpeak_183635|chr8_82571701_82598589_IMPA1_NM_-|	15.6265	4.25491	1.82351	-2.33336	0.0196291	NA	7.70595	25.454	1.27745	4.6082	1.05326	0	3.08238	5.35875	28.7426	14.9767	13.6924	81.5669	92.6144	7.70365	2.60473	-1.56785	4.17258	IMPA1	-	-
chr9:3501726-3501787:mpeak_189202|chr9_3225280_3526001_RFX3_NM_-|	15.6397	4.02434	1.42486	-2.82437	0.00473732	NA	41.6121	10.7175	5.10979	0	3.15978	0.526238	16.9531	17.4159	28.7426	9.21641	27.3847	26.8381	91.0125	8.71545	3.96191	-0.00747158	3.96938	RFX3	-	-
chr11:76233015-76233182:mpeak_35414|chr11_76156068_76260995_C11orf30_NM_+|	36.1813	1.92746	0.942483	-2.04509	0.040846	0.212333	46.2357	48.2287	21.7166	14.9767	12.6391	8.94605	15.4119	38.8509	73.4532	36.8656	35.8108	81.0407	90.9682	23.7851	1.66796	-0.267338	1.9353	C11orf30	-	-
chr15:63978552-63978604:mpeak_66427|chr15_63901465_64126147_HERC1_NM_-|	14.5326	3.27656	1.60168	-2.0457	0.0407861	NA	18.4943	6.69843	1.27745	5.76025	3.15978	1.05248	6.16476	1.33969	21.7166	21.889	12.6391	74.1996	90.5859	9.17201	1.40834	-1.89564	3.30398	HERC1	-	-
chr3:61583944-61584004:mpeak_128565|chr3_61547242_62278835_PTPRG_NM_+|	5.37231	4.10114	1.9769	-2.07453	0.0380301	NA	1.54119	8.03812	5.10979	2.3041	0	0.526238	0	1.33969	9.58085	14.9767	2.10652	18.9446	89.6726	11.784	2.3757	-1.72206	4.09776	PTPRG	-	-
chr10:7825821-7825908:mpeak_20348|chr10_7795562_7829990_KIN_NR_-mpeak_20348|chr10_7798105_7829990_KIN_NM_-||	18.402	2.60611	1.22478	-2.12782	0.0333519	NA	15.4119	8.03812	10.2196	13.8246	3.15978	2.63119	18.4943	2.67937	16.6068	27.6492	25.2782	76.8308	89.1191	15.117	0.779447	-1.78011	2.55956	KIN	-	-
chr12:83287671-83287821:mpeak_46137|chr12_83080933_83525988_TMTC2_NM_+|	5.06934	4.4491	1.83681	-2.42219	0.0154273	NA	3.08238	10.7175	3.19362	0	1.05326	0	7.70595	2.67937	8.94213	3.45615	6.31955	13.6822	87.9241	13.47	4.01205	-0.279422	4.29147	TMTC2	-	-
chr10:24562731-24562863:mpeak_21790|chr10_23983674_24834755_KIAA1217_NM_+|	19.666	2.71396	1.14106	-2.37846	0.017385	NA	3.08238	24.1144	6.38724	2.3041	12.6391	4.2099	7.70595	16.0762	14.6906	36.8656	50.5564	57.3599	87.2927	13.2289	0.810194	-1.91197	2.72216	KIAA1217	-	-
chr7:154754106-154754253:mpeak_179359|chr7_154735872_154794682_PAXIP1_NM_-|	37.5009	2.28437	1.14968	-1.98697	0.0469261	0.228561	30.8238	34.8319	28.1038	16.1287	16.8521	4.73614	20.0355	16.0762	72.1758	33.4095	29.4912	147.347	86.5839	17.9393	1.31375	-0.957221	2.27097	PAXIP1	-	-
chr6:43746185-43746279:mpeak_162805|chr6_43737945_43752277_VEGFA_NM_+|	73.4093	1.8611	0.893255	-2.0835	0.0372057	0.201673	110.966	73.6828	68.9821	32.2574	13.6924	18.4183	52.4005	64.305	176.288	59.9066	58.9825	151.03	86.5654	23.8472	1.97831	0.118338	1.85997	VEGFA	-	-
chr10:93723588-93723641:mpeak_26230|chr10_93683735_93788546_BTAF1_NM_+|	9.26978	2.75379	1.32317	-2.08121	0.0374146	NA	3.08238	2.67937	8.94213	2.3041	5.26629	2.10495	7.70595	4.01906	5.74851	17.2808	8.42607	43.6778	84.1495	13.9445	0.603812	-1.98944	2.59326	BTAF1	-	-
chr12:122794305-122794427:mpeak_49585|chr12_122757647_122907116_CLIP1_NM_-|	36.5398	2.19518	0.956591	-2.2948	0.0217447	0.153171	41.6121	36.1715	17.2455	16.1287	14.7456	4.73614	23.1178	37.5112	53.6528	47.2341	36.8641	109.458	83.1534	18.3981	1.41607	-0.760152	2.17622	CLIP1	-	-
chr3:132136562-132136613:mpeak_132636|chr3_132136552_132257019_DNAJC13_NM_+|	33.2673	2.08451	0.94872	-2.19718	0.0280075	0.173587	33.9062	29.4731	33.2136	12.6726	8.42607	8.94605	12.3295	22.7747	81.1179	61.0587	54.7695	40.5203	83.1106	19.2165	1.68481	-0.427881	2.11269	DNAJC13	-	-
chr1:244582052-244582167:mpeak_19454|chr1_244572940_244615436_ADSS_NM_-|	47.2647	2.53587	1.1412	-2.2221	0.0262763	0.167669	50.8593	13.3969	42.1558	23.041	14.7456	4.2099	20.0355	25.454	83.0341	57.6025	60.0357	172.606	82.7956	14.4694	1.34132	-1.17523	2.51655	ADSS	-	-
chr9:35797208-35797263:mpeak_190567|chr9_35792405_35809376_NPR2_NM_+|	5.77371	5.44065	1.89532	-2.87058	0.00409725	NA	12.3295	4.01906	2.55489	0	0	0	3.08238	4.01906	15.9681	11.5205	5.26629	10.5248	81.9413	#DIV/0!	Inf	-0.243523	Inf	NPR2	-	-
chr12:44254300-44254502:mpeak_41607|chr12_44229663_44781808_TMEM117_NM_+|	10.2221	4.73636	1.65763	-2.85731	0.00427248	NA	12.3295	9.37781	5.74851	0	2.10652	0	7.70595	9.37781	16.6068	11.5205	5.26629	42.6253	81.4941	10.6368	3.70418	-0.818412	4.52259	TMEM117	-	-
chr6:41060192-41060245:mpeak_162400|chr6_41040706_41065095_NFYA_NM_+|	17.697	2.58952	1.25952	-2.05596	0.0397866	NA	12.3295	2.67937	17.2455	12.6726	3.15978	1.57871	4.62357	13.3969	21.7166	40.3218	27.3847	55.255	81.1697	14.1598	0.889494	-1.62965	2.51914	NFYA	-	-
chr1:235396051-235396210:mpeak_19100|chr1_235331967_235491532_ARID4B_NM_-|	26.7993	2.0363	0.818809	-2.48691	0.0128859	0.123487	10.7883	28.1334	11.497	12.6726	11.5858	10.5248	20.0355	29.4731	12.7745	65.6669	47.3966	61.0436	80.951	19.978	0.535572	-1.48306	2.01864	ARID4B	-	-
chrX:24225868-24226039:mpeak_198233|chrX_24167761_24228309_ZFX_NM_+|	46.8601	2.03456	1.01172	-2.011	0.0443255	0.221682	50.8593	21.435	7.02596	18.4328	26.3315	16.8396	24.659	21.435	52.3753	70.2751	78.9944	173.659	80.5532	19.0767	0.364667	-1.71347	2.07813	ZFX	-	-
chr4:140020257-140020341:mpeak_145123|chr4_139980761_140060630_ELF2_NM_-|	30.8256	2.59539	1.27424	-2.03682	0.0416685	0.214298	9.24714	49.5684	6.38724	1.15205	20.0119	4.73614	29.2826	21.435	31.2975	54.1464	44.2369	98.4065	79.501	13.1613	1.33198	-1.26269	2.59467	ELF2	-	-
chr2:114397671-114397737:mpeak_105482|chr2_114384805_114399607_RABL2A_NM_+|	24.1686	2.40468	1.14914	-2.09259	0.036386	0.199376	29.2826	42.87	12.7745	2.3041	10.5326	0.526238	23.1178	42.87	40.8783	19.5849	38.9706	26.3119	79.4705	15.7457	2.66799	0.332523	2.33546	RABL2A	-	-
chr13:52744110-52744158:mpeak_53791|chr13_52743439_52768602_MRPS31P5_NR_-|	7.17066	4.60131	1.72191	-2.67221	0.00753541	NA	4.62357	2.67937	10.8583	0	3.15978	1.57871	0	0	7.66468	20.7369	20.0119	14.7347	78.9824	12.8105	1.93836	-2.85576	4.79412	MRPS31P5	-	-
chr12:120487021-120487187:mpeak_49146|chr12_120427647_120530803_CCDC64_NM_+|	4.61493	5.8543	2.18642	-2.67758	0.00741568	NA	6.16476	10.7175	2.55489	1.15205	0	0	0	0	8.30341	8.06436	5.26629	13.156	78.0288	13.0487	4.07654	-1.67349	5.75003	CCDC64	-	-
chr2:27425641-27425702:mpeak_99223|chr2_27422705_27435175_SLC5A6_NR_-mpeak_99223|chr2_27423447_27435175_SLC5A6_NM_-||	6.50715	4.56548	1.64907	-2.76853	0.00563103	NA	7.70595	2.67937	11.497	0	1.05326	0	13.8707	6.69843	7.66468	6.9123	9.47933	10.5248	77.504	11.7392	4.37684	0.0689395	4.3079	SLC5A6	-	-
chr1:94302925-94303038:mpeak_7111|chr1_94027976_94312706_BCAR3_NM_-|	15.7696	4.92763	1.97537	-2.49453	0.0126123	NA	7.70595	13.3969	1.91617	1.15205	4.21303	0	0	1.33969	18.523	11.5205	17.9054	111.562	77.2605	5.70801	2.10115	-2.82744	4.9286	BCAR3	-	-
chr19:24254462-24254512:mpeak_93724|chr19_24216206_24309055_ZNF254_NM_+|	9.35661	4.91699	1.76632	-2.78374	0.00537356	NA	3.08238	18.7556	1.27745	0	0	1.05248	16.9531	8.03812	5.10979	19.5849	13.6924	24.7332	76.7929	5.44286	4.457	-0.946501	5.4035	ZNF254	-	-
chr3:101229357-101229413:mpeak_130344|chr3_101044924_101232085_SENP7_NM_-|	16.8375	2.7982	1.25212	-2.23478	0.025432	NA	9.24714	5.35875	9.58085	5.76025	9.47933	0	7.70595	10.7175	13.4132	33.4095	31.5978	65.7798	75.9714	17.4783	0.666393	-2.03846	2.70485	SENP7	-	-
chr12:32144243-32144375:mpeak_41024|chr12_32112352_32145311_KIAA1551_NM_+|	4.67763	5.57642	2.06831	-2.69613	0.007015	NA	6.16476	6.69843	5.74851	0	0	0	3.08238	0	13.4132	5.76025	4.21303	11.051	75.219	#DIV/0!	Inf	-0.349978	Inf	KIAA1551	-	-
chr3:149688505-149688568:mpeak_134078|chr3_149684373_149688741_PFN2_NM_-|	623.84	2.21519	1.11433	-1.98792	0.046821	0.228254	621.1	387.169	468.184	206.217	212.758	144.715	325.191	211.67	1426.91	539.16	379.173	2563.83	75.1846	16.1879	1.38916	-0.826358	2.21552	PFN2	-	-
chr10:11543051-11543184:mpeak_20614|chr10_11505848_11653788_USP6NL_NM_-|	15.9843	3.61202	1.23762	-2.91852	0.00351695	NA	15.4119	6.69843	8.30341	4.6082	3.15978	0	9.24714	17.4159	14.0519	27.6492	21.0652	64.201	74.6991	10.3192	1.96911	-1.47161	3.44072	USP6NL	-	-
chr11:9492015-9492148:mpeak_30364|chr11_9482511_9549076_ZNF143_NM_+|	22.927	3.49534	1.58359	-2.20722	0.0272986	0.171186	13.8707	8.03812	7.02596	3.45615	9.47933	0	6.16476	2.67937	30.02	26.4972	30.5445	137.348	74.4511	9.9816	1.16147	-2.32244	3.48391	ZNF143	-	-
chr10:24813610-24813700:mpeak_21838|chr10_23983674_24834755_KIAA1217_NM_+|	18.4663	3.27466	0.985011	-3.32449	0.000885797	NA	4.62357	13.3969	10.2196	1.15205	3.15978	5.78862	7.70595	16.0762	14.6906	36.8656	50.5564	57.3599	73.4025	6.97631	1.48332	-1.91197	3.39529	KIAA1217	-	-
chr10:11605740-11605791:mpeak_20627|chr10_11505848_11653788_USP6NL_NM_-|	15.3628	6.45116	1.52558	-4.22866	2.35091e-05	NA	9.24714	13.3969	7.02596	0	1.05326	0	9.24714	17.4159	14.0519	27.6492	21.0652	64.201	72.8723	2.79836	4.81607	-1.47161	6.28768	USP6NL	-	-
chr3:61654234-61654284:mpeak_128574|chr3_61547242_62278835_PTPRG_NM_+|	5.08657	4.32454	2.08839	-2.07076	0.0383814	NA	1.54119	2.67937	7.66468	1.15205	1.05326	0	0	1.33969	9.58085	14.9767	2.10652	18.9446	72.5559	9.18171	2.43012	-1.72206	4.15218	PTPRG	-	-
chr4:159137446-159137586:mpeak_146567|chr4_159131400_159174595_TMEM144_NM_+|	20.8454	3.25746	1.48681	-2.19091	0.0284585	NA	7.70595	52.2478	8.94213	0	6.31955	0	16.9531	46.889	32.5749	25.3451	23.1717	29.9956	71.4561	24.1473	3.44652	0.296368	3.15016	TMEM144	-	-
chr22:46843540-46843591:mpeak_123987|chr22_46759084_46933067_CELSR1_NM_-|	11.1791	3.34759	1.34877	-2.48195	0.0130664	NA	6.16476	6.69843	5.74851	1.15205	4.21303	0.526238	4.62357	2.67937	19.1617	18.4328	29.4912	35.2579	70.3267	7.08245	1.65955	-1.6522	3.31175	CELSR1	-	-
chr8:100606375-100606425:mpeak_185254|chr8_100025493_100887645_VPS13B_NM_+|	6.14968	5.37431	1.71915	-3.12614	0.00177118	NA	7.70595	6.69843	3.83234	0	0	0	4.62357	6.69843	14.6906	6.9123	8.42607	14.2084	70.1072	#DIV/0!	Inf	-0.183789	Inf	VPS13B	-	-
chr1:169850680-169850737:mpeak_14157|chr1_169822913_169863100_SCYL3_NM_-|	14.023	5.80778	1.86554	-3.11318	0.00185083	NA	0	9.37781	8.94213	0	1.05326	0	4.62357	16.0762	18.523	20.7369	11.5858	77.357	70.0611	2.88091	4.12048	-1.48353	5.60402	SCYL3	-	-
chr11:82918397-82918472:mpeak_35832|chr11_82904780_82923694_ANKRD42_NR_+mpeak_35832|chr11_82904780_82966886_ANKRD42_NM_+||	9.26242	5.08705	1.9592	-2.59649	0.00941804	NA	12.3295	10.7175	0	0	0	0	23.1178	9.37781	18.523	14.9767	6.31955	15.7871	67.7606	#DIV/0!	Inf	0.460253	Inf	ANKRD42	-	-
chr9:96800656-96800724:mpeak_192792|chr9_96793075_96870109_PTPDC1_NM_+|	12.3083	5.25133	1.79164	-2.93101	0.00337861	NA	9.24714	0	12.1357	1.15205	0	0	9.24714	13.3969	24.9102	14.9767	15.7989	46.8352	67.4479	4.45319	4.21418	-0.706683	4.92086	PTPDC1	-	-
chr6:57493065-57493177:mpeak_163609|chr6_57179602_57512796_PRIM2_NM_+|	9.1738	3.97134	1.84382	-2.15387	0.0312503	NA	0	6.69843	7.02596	1.15205	1.05326	0	6.16476	2.67937	21.7166	17.2808	7.37281	38.9416	67.3629	5.2016	2.63769	-1.05724	3.69493	PRIM2	-	-
chr11:116935039-116935171:mpeak_37441|chr11_116716345_116969131_SIK3_NM_-|	26.8436	1.96446	0.978228	-2.00818	0.0446238	0.22231	7.70595	41.5303	12.1357	6.9123	13.6924	4.2099	27.7414	33.4922	31.2975	57.6025	35.8108	49.9926	66.3258	17.3037	1.30639	-0.632096	1.93849	SIK3	-	-
chr17:64404276-64404340:mpeak_85689|chr17_64298925_64799990_PRKCA_NM_+|	12.3879	2.91796	1.30302	-2.23939	0.0251304	NA	12.3295	14.7366	9.58085	1.15205	3.15978	0.526238	6.16476	18.7556	30.6587	18.4328	6.31955	26.8381	65.9365	9.37782	2.92119	0.107437	2.81375	PRKCA	-	-
chr9:129820795-129820851:mpeak_195886|chr9_129677052_129981018_RALGPS1_NM_+|	7.86731	3.49319	1.77121	-1.97221	0.0485856	NA	3.08238	9.37781	3.83234	0	3.15978	0	1.54119	5.35875	17.8843	8.06436	10.5326	31.5743	65.7376	18.894	2.36632	-1.01744	3.38376	RALGPS1	-	-
chr8:109462666-109462731:mpeak_186164|chr8_109455852_109498740_EMC2_NM_+|	72.8489	2.3331	0.94849	-2.45981	0.0139011	0.127653	72.4359	32.1525	33.8523	21.889	20.0119	17.3659	21.5767	42.87	147.545	161.287	116.912	186.288	65.3048	12.7596	1.22397	-1.13163	2.3556	EMC2	-	-
chr1:156124626-156124694:mpeak_12958|chr1_156119734_156146195_SEMA4A_NM_+|	20.8655	3.66893	1.75332	-2.09256	0.0363883	NA	7.70595	24.1144	5.74851	1.15205	6.31955	0	3.08238	4.01906	52.3753	25.3451	21.0652	99.459	63.1655	7.68318	2.33005	-1.29428	3.62432	SEMA4A	-	-
chr12:96057847-96057897:mpeak_46848|chr12_96052998_96184536_NTN4_NM_-|	12.0676	3.78451	1.84177	-2.05481	0.0398969	NA	4.62357	18.7556	0	1.15205	1.05326	0	13.8707	9.37781	32.5749	14.9767	16.8521	31.5743	62.8209	5.21736	3.40617	-0.183683	3.58985	NTN4	-	-
chr15:63952993-63953053:mpeak_66422|chr15_63901465_64126147_HERC1_NM_-|	13.4636	3.77829	1.73594	-2.17651	0.0295168	NA	4.62357	6.69843	7.02596	0	5.26629	0	6.16476	1.33969	21.7166	21.889	12.6391	74.1996	62.7902	14.5307	1.80076	-1.89564	3.6964	HERC1	-	-
chr12:107882632-107882759:mpeak_47896|chr12_107712196_108051285_BTBD11_NM_+|	9.84565	5.3755	2.0166	-2.66562	0.00768456	NA	0	17.4159	3.19362	0	0	0	10.7883	12.0572	26.8264	5.76025	9.47933	32.6268	62.237	#DIV/0!	Inf	0.0534184	Inf	BTBD11	-	-
chr21:47746253-47746467:mpeak_121086|chr21_47744035_47865196_PCNT_NM_+|	48.8605	2.41077	0.969952	-2.48545	0.0129386	0.123722	24.659	32.1525	14.6906	17.2808	17.9054	5.78862	18.4943	33.4922	65.1498	71.4271	86.3672	198.918	61.0419	11.4868	0.803251	-1.60657	2.40982	PCNT	-	-
chr2:205658776-205658828:mpeak_111297|chr2_205410515_206480179_PARD3B_NM_+|	7.98592	5.65605	2.12559	-2.66094	0.00779239	NA	3.08238	0	8.94213	0	0	0	16.9531	12.0572	0.638724	11.5205	15.7989	26.8381	60.8343	#DIV/0!	Inf	-0.869179	Inf	PARD3B	-	-
chr21:43428180-43428284:mpeak_120565|chr21_43414217_43430496_ZBTB21_NM_-|	31.9692	3.03875	1.05557	-2.87877	0.00399226	0.076967	30.8238	29.4731	17.2455	4.6082	7.37281	1.05248	43.1533	36.1715	48.543	35.7136	24.2249	105.248	60.6426	7.89018	2.57276	-0.369439	2.9422	ZBTB21	-	-
chr12:65685210-65685366:mpeak_44682|chr12_65672422_65856934_MSRB3_NM_+|	6.35667	3.96799	1.72482	-2.30052	0.0214188	NA	3.08238	13.3969	2.55489	1.15205	0	0	12.3295	12.0572	7.02596	11.5205	6.31955	6.84109	60.5939	14.0032	4.04631	0.347936	3.69838	MSRB3	-	-
chr2:46844098-46844149:mpeak_100954|chr2_46808730_46844251_PIGF_NM_-|	8.86009	5.05565	1.89914	-2.66207	0.00776618	NA	9.24714	5.35875	5.74851	0	0	0.526238	6.16476	1.33969	26.1877	8.06436	8.42607	35.2579	60.4129	3.05075	5.27348	-0.619103	5.89258	PIGF	-	-
chr12:39730922-39731048:mpeak_41353|chr12_39688319_39837192_KIF21A_NM_-|	18.9334	2.73522	1.29487	-2.11236	0.0346557	NA	10.7883	21.435	5.74851	4.6082	6.31955	0	15.4119	12.0572	35.7685	40.3218	21.0652	53.6763	60.0463	14.2458	1.79693	-0.863572	2.6605	KIF21A	-	-
chr18:29992142-29992239:mpeak_89208|chr18_29848731_30050447_GAREM_NM_-|	68.4439	1.98824	0.858487	-2.31598	0.0205596	0.149547	94.0126	30.8128	58.7626	13.8246	24.2249	5.78862	89.389	75.0225	143.713	72.5792	94.7933	118.404	59.5824	15.34	2.06621	0.108627	1.95758	GAREM	-	-
chr10:104746763-104746954:mpeak_27564|chr10_104678074_104836727_CNNM2_NM_+|	9.78228	3.36383	1.52933	-2.19955	0.0278391	NA	3.08238	14.7366	7.02596	0	3.15978	0	15.4119	8.03812	18.523	12.6726	7.37281	27.3644	59.1926	19.9945	2.97506	-0.175722	3.15078	CNNM2	-	-
chr2:201253940-201254013:mpeak_110730|chr2_201170603_201342358_SPATS2L_NM_+|	33.4634	2.93595	1.23242	-2.38227	0.0172063	0.139406	18.4943	34.8319	24.2715	2.3041	4.21303	6.31486	23.1178	13.3969	97.7247	31.1054	25.2782	120.509	57.8054	7.25414	2.59627	-0.398061	2.99433	SPATS2L	-	-
chr5:98208705-98208765:mpeak_153124|chr5_98192429_98262238_CHD1_NM_-|	34.9129	2.71814	1.14912	-2.36541	0.0180102	0.141493	23.1178	17.4159	2.55489	13.8246	8.42607	2.10495	23.1178	36.1715	15.9681	78.3395	64.2488	133.664	57.255	8.81643	0.823053	-1.87608	2.69913	CHD1	-	-
chr1:235406215-235406566:mpeak_19102|chr1_235331967_235491532_ARID4B_NM_-|	24.7093	2.05891	0.92985	-2.21424	0.0268124	0.169619	13.8707	13.3969	8.30341	16.1287	3.15978	5.26238	20.0355	29.4731	12.7745	65.6669	47.3966	61.0436	57.1118	14.101	0.534927	-1.48306	2.01799	ARID4B	-	-
chr6:34991323-34991413:mpeak_161841|chr6_34857037_35056382_ANKS1A_NM_+|	38.4648	1.81789	0.839298	-2.16597	0.0303136	0.180932	46.2357	28.1334	30.02	6.9123	9.47933	7.36733	44.6945	44.2097	95.8085	27.6492	44.2369	76.8308	56.5143	15.976	2.13543	0.312715	1.82271	ANKS1A	-	-
chr1:235471140-235471215:mpeak_19110|chr1_235331967_235491532_ARID4B_NM_-|	24.0571	2.49842	0.981413	-2.54574	0.0109046	0.115283	7.70595	22.7747	4.47107	5.76025	7.37281	4.2099	20.0355	29.4731	12.7745	65.6669	47.3966	61.0436	56.1175	9.96109	1.01101	-1.48306	2.49408	ARID4B	-	-
chr2:205570719-205570832:mpeak_111285|chr2_205410515_206480179_PARD3B_NM_+|	8.36998	6.05482	1.87406	-3.23085	0.00123421	NA	6.16476	5.35875	5.10979	0	0	0	16.9531	12.0572	0.638724	11.5205	15.7989	26.8381	56.1007	#DIV/0!	Inf	-0.869179	Inf	PARD3B	-	-
chr12:132198633-132198788:mpeak_50182|chr12_132195631_132283967_SFSWAP_NM_+|	27.4185	3.2374	1.24679	-2.5966	0.00941527	0.108976	18.4943	6.69843	8.30341	5.76025	3.15978	3.68367	4.62357	12.0572	44.0719	31.1054	53.7162	137.348	55.1352	5.673	1.41015	-1.87064	3.28079	SFSWAP	-	-
chr5:56231250-56231311:mpeak_150207|chr5_56219412_56247957_MIER3_NM_-|	15.6738	3.74663	1.4843	-2.52417	0.0115973	NA	13.8707	10.7175	8.94213	2.3041	3.15978	1.05248	0	9.37781	31.9362	23.041	16.8521	66.8322	54.1065	6.10572	2.36333	-1.3692	3.73253	MIER3	-	-
chr7:98015780-98015909:mpeak_175354|chr7_97922908_98030427_BAIAP2L1_NM_-|	100.75	1.76759	0.846591	-2.08789	0.0368078	0.200573	78.6007	69.6637	54.2915	41.4738	35.8108	9.47228	117.13	104.496	155.849	129.03	111.645	301.534	53.6608	16.0006	1.22327	-0.522471	1.74574	BAIAP2L1	-	-
chr12:93213802-93213887:mpeak_46585|chr12_93169909_93323107_EEA1_NM_-|	33.2141	1.81432	0.850212	-2.13396	0.0328458	0.18847	30.8238	29.4731	10.2196	13.8246	8.42607	4.2099	49.3181	37.5112	44.7107	55.2984	46.3434	68.4109	53.6084	15.5602	1.41412	-0.370481	1.7846	EEA1	-	-
chr14:96689707-96689829:mpeak_62139|chr14_96671134_96706739_BDKRB2_NM_+|	24.284	2.1619	0.937409	-2.30625	0.0210968	0.151004	6.16476	13.3969	17.2455	8.06436	3.15978	8.94605	29.2826	28.1334	12.1357	38.0177	50.5564	76.3045	52.9205	12.2334	0.867763	-1.24524	2.11301	BDKRB2	-	-
chr12:107775787-107775988:mpeak_47883|chr12_107712196_108051285_BTBD11_NM_+|	10.5759	3.17808	1.56729	-2.02775	0.0425853	NA	7.70595	13.3969	5.10979	0	3.15978	0	10.7883	12.0572	26.8264	5.76025	9.47933	32.6268	52.7715	19.8037	3.05237	0.0534184	2.99895	BTBD11	-	-
chr10:11591606-11591872:mpeak_20623|chr10_11505848_11653788_USP6NL_NM_-|	15.5176	2.4707	1.21069	-2.04075	0.0412761	NA	1.54119	13.3969	6.38724	2.3041	7.37281	1.57871	9.24714	17.4159	14.0519	27.6492	21.0652	64.201	52.377	9.96819	0.921919	-1.47161	2.39353	USP6NL	-	-
chr2:128480155-128480275:mpeak_106013|chr2_128464126_128568761_WDR33_NM_-|	33.0566	1.74354	0.781403	-2.2313	0.0256615	0.165903	26.2002	21.435	18.523	13.8246	8.42607	5.78862	30.8238	41.5303	54.2915	55.2984	38.9706	81.5669	52.2388	15.9463	1.23847	-0.473433	1.7119	WDR33	-	-
chr9:129701086-129701140:mpeak_195867|chr9_129677052_129981018_RALGPS1_NM_+|	7.29514	5.76652	1.9564	-2.94751	0.00320345	NA	1.54119	4.01906	7.02596	0	0	0	1.54119	5.35875	17.8843	8.06436	10.5326	31.5743	50.7832	#DIV/0!	Inf	-1.01744	Inf	RALGPS1	-	-
chr12:65704062-65704113:mpeak_44684|chr12_65672422_65856934_MSRB3_NM_+|	6.07834	3.73268	1.6146	-2.31183	0.0207873	NA	4.62357	6.69843	4.47107	0	1.05326	0	12.3295	12.0572	7.02596	11.5205	6.31955	6.84109	50.2761	12.8024	3.90636	0.347936	3.55842	MSRB3	-	-
chr16:27725839-27726066:mpeak_72825|chr16_27561467_27789894_KIAA0556_NM_+|	22.8798	2.78127	1.17594	-2.36513	0.0180235	0.141493	15.4119	10.7175	7.02596	1.15205	7.37281	3.15743	10.7883	18.7556	36.4072	25.3451	31.5978	106.826	50.2726	7.13339	1.50492	-1.31219	2.81711	KIAA0556	-	-
chr3:160017653-160017859:mpeak_134950|chr3_159976423_160117320_IFT80_NM_-|	15.8135	3.88496	1.72766	-2.24869	0.0245324	NA	10.7883	14.7366	0	1.15205	1.05326	0	24.659	14.7366	37.6847	20.7369	18.9587	45.2565	49.672	3.89392	3.53285	-0.140287	3.67314	IFT80	-	-
chr17:65554526-65554680:mpeak_85879|chr17_65373396_65688687_PITPNC1_NM_+|	25.4827	3.0383	1.44457	-2.10325	0.0354438	0.196435	21.5767	22.7747	2.55489	5.76025	2.10652	1.57871	7.70595	14.7366	72.1758	25.3451	30.5445	98.9328	49.5742	6.10085	2.31208	-0.710423	3.02251	PITPNC1	-	-
chr14:67124829-67124894:mpeak_59477|chr14_66974124_67647520_GPHN_NM_+|	22.1113	3.23968	1.45706	-2.22344	0.0261863	0.167454	4.62357	37.5112	5.10979	2.3041	4.21303	0	23.1178	21.435	51.7366	18.4328	32.651	64.201	49.0652	8.47961	2.85784	-0.259754	3.11759	GPHN	-	-
chr12:107813687-107813745:mpeak_47887|chr12_107712196_108051285_BTBD11_NM_+|	10.1518	5.64266	1.73368	-3.25474	0.00113498	NA	4.62357	10.7175	8.94213	0	0	0	10.7883	12.0572	26.8264	5.76025	9.47933	32.6268	48.8872	#DIV/0!	Inf	0.0534184	Inf	BTBD11	-	-
chr8:98925077-98925135:mpeak_184942|chr8_98881310_99047884_MATN2_NM_+|	14.3282	6.21751	1.86027	-3.34226	0.000830987	NA	0	10.7175	4.47107	0	0	0	4.62357	14.7366	27.4651	35.7136	14.7456	59.4649	48.655	#DIV/0!	Inf	-1.23115	Inf	MATN2	-	-
chr12:107727659-107727858:mpeak_47876|chr12_107712196_108051285_BTBD11_NM_+|	10.1672	4.67473	1.77989	-2.62641	0.00862903	NA	1.54119	14.7366	7.66468	0	0	0.526238	10.7883	12.0572	26.8264	5.76025	9.47933	32.6268	48.2011	3.29817	5.50771	0.0534184	5.45429	BTBD11	-	-
chr14:20811797-20811850:mpeak_55647|chr14_20811772_20825796_PARP2_NM_+|	33.0591	2.32272	0.911544	-2.54812	0.0108306	0.114871	18.4943	5.35875	12.1357	5.76025	11.5858	7.89357	43.1533	13.3969	18.523	89.86	63.1955	107.353	47.9383	9.69235	0.511854	-1.7944	2.30626	PARP2	-	-
chr12:123107845-123107898:mpeak_49680|chr12_123011808_123110751_KNTC1_NM_+|	23.4986	3.28519	1.28163	-2.5633	0.0103683	0.113543	9.24714	14.7366	11.497	2.3041	6.31955	0	15.4119	14.7366	44.7107	28.8013	37.9173	96.3016	47.3967	7.9349	2.04066	-1.1228	3.16346	KNTC1	-	-
chr5:16680524-16680665:mpeak_148610|chr5_16666902_16936385_MYO10_NM_-|	142.777	1.80261	0.698027	-2.58243	0.00981068	0.111042	101.719	112.534	102.196	23.041	45.2901	18.4183	189.566	202.293	281.677	161.287	145.35	329.951	46.9831	13.6273	1.86704	0.0813952	1.78565	MYO10	-	-
chr1:197056837-197056937:mpeak_15941|chr1_197053556_197115824_ASPM_NM_-|	27.3564	2.39372	0.901335	-2.65574	0.00791336	0.101075	6.16476	13.3969	8.94213	3.45615	12.6391	4.2099	20.0355	22.7747	17.8843	58.7546	56.876	103.143	46.9627	9.28137	0.489306	-1.8498	2.33911	ASPM	-	-
chr19:54660498-54660593:mpeak_96842|chr19_54659678_54663481_LENG1_NM_-|	20.2794	3.01675	1.00263	-3.00883	0.00262252	NA	10.7883	8.03812	3.19362	1.15205	2.10652	4.73614	13.8707	13.3969	19.8004	54.1464	47.3966	64.7273	46.7835	4.80826	1.4617	-1.82071	3.28241	LENG1	-	-
chr1:231083793-231083902:mpeak_18753|chr1_231042765_231114618_TTC13_NM_-|	11.7062	3.51812	1.54085	-2.28324	0.0224164	NA	6.16476	6.69843	8.94213	1.15205	2.10652	0	6.16476	6.69843	33.8523	9.21641	18.9587	40.5203	46.6768	7.11525	2.74237	-0.556311	3.29868	TTC13	-	-
chr3:53005499-53005557:mpeak_128162|chr3_52939292_53080089_SFMBT1_NM_-|	12.6494	3.77637	1.71082	-2.20735	0.0272895	NA	0	12.0572	4.47107	0	2.10652	0	9.24714	12.0572	31.9362	17.2808	20.0119	42.6253	46.5667	7.90755	2.972	-0.585996	3.558	SFMBT1	-	-
chrX:106185254-106185456:mpeak_200647|chrX_106184862_106243474_MORC4_NM_-|	78.931	1.41345	0.712717	-1.98319	0.0473463	0.229654	64.73	58.9462	35.7685	18.4328	17.9054	28.4169	106.342	97.7971	139.242	104.837	77.9411	196.813	46.4338	17.0592	1.29999	-0.144635	1.44463	MORC4	-	-
chr4:113338940-113339000:mpeak_144197|chr4_113218498_113362358_ALPK1_NM_+|	11.936	2.95268	1.44214	-2.04743	0.0406161	NA	10.7883	1.33969	5.10979	0	5.26629	0	9.24714	13.3969	15.3294	19.5849	28.438	34.7317	45.3945	19.0913	1.71072	-1.12385	2.83457	ALPK1	-	-
chr16:67764750-67764841:mpeak_74739|chr16_67760461_67840555_RANBP10_NM_-|	85.6161	2.31428	0.91512	-2.52894	0.0114408	0.117735	70.8947	81.7209	29.3813	4.6082	25.2782	7.36733	135.625	109.854	156.487	95.6202	102.166	208.39	45.2767	9.17181	2.28846	-0.0150325	2.30349	RANBP10	-	-
chr10:24760598-24760657:mpeak_21820|chr10_23983674_24834755_KIAA1217_NM_+|	17.6585	2.47128	0.988455	-2.50014	0.0124144	NA	4.62357	9.37781	3.19362	4.6082	4.21303	2.63119	7.70595	16.0762	14.6906	36.8656	50.5564	57.3599	44.6939	7.91012	0.586335	-1.91197	2.49831	KIAA1217	-	-
chr15:57242059-57242112:mpeak_65899|chr15_57210832_57578354_TCF12_NM_+|	22.5203	3.08599	1.45355	-2.12308	0.0337472	0.191288	6.16476	16.0762	3.83234	1.15205	8.42607	0	13.8707	10.7175	33.8523	52.9943	24.2249	98.9328	44.6152	8.15612	1.44476	-1.59178	3.03654	TCF12	-	-
chr8:98928101-98928164:mpeak_184943|chr8_98881310_99047884_MATN2_NM_+|	14.8003	6.63211	1.68256	-3.94168	8.09123e-05	NA	7.70595	8.03812	5.10979	0	0	0	4.62357	14.7366	27.4651	35.7136	14.7456	59.4649	44.5355	#DIV/0!	Inf	-1.23115	Inf	MATN2	-	-
chr17:64371265-64371370:mpeak_85679|chr17_64298925_64799990_PRKCA_NM_+|	11.0879	4.57502	1.71408	-2.66907	0.00760606	NA	6.16476	14.7366	3.83234	1.15205	0	0	6.16476	18.7556	30.6587	18.4328	6.31955	26.8381	44.5017	6.6992	4.4242	0.107437	4.31676	PRKCA	-	-
chr5:112370676-112370794:mpeak_154070|chr5_112363179_112824527_MCC_NM_-|	15.7202	3.39885	1.63723	-2.07597	0.0378963	NA	4.62357	8.03812	7.02596	1.15205	4.21303	0	6.16476	5.35875	33.2136	17.2808	10.5326	91.0392	44.0074	6.7711	1.87562	-1.40963	3.28525	MCC	-	-
chr3:142095277-142095389:mpeak_133588|chr3_142030655_142166904_XRN1_NM_-|	32.4283	2.22921	0.983359	-2.26693	0.0233943	0.158623	26.2002	10.7175	10.2196	9.21641	8.42607	2.63119	36.9886	25.454	45.9881	38.0177	57.9292	117.351	43.4723	9.50486	1.21726	-0.976097	2.19336	XRN1	-	-
chr12:123061999-123062137:mpeak_49667|chr12_123011808_123110751_KNTC1_NM_+|	23.1467	3.27961	1.26878	-2.58484	0.00974235	0.110816	3.08238	14.7366	14.6906	0	5.26629	2.10495	15.4119	14.7366	44.7107	28.8013	37.9173	96.3016	43.4277	6.78252	2.14088	-1.1228	3.26368	KNTC1	-	-
chr13:42479618-42479692:mpeak_52643|chr13_42142441_42535221_VWA8_NM_-|	14.7023	4.95711	1.85717	-2.66917	0.00760384	NA	0	0	10.8583	0	0	0	21.5767	25.454	28.7426	21.889	30.5445	37.3629	42.99	#DIV/0!	Inf	-0.244968	Inf	VWA8	-	-
chr5:66160331-66160481:mpeak_150870|chr5_65892175_66458974_MAST4_NM_+|	61.2254	3.34029	1.27746	-2.61479	0.00892823	0.106449	15.4119	65.6446	3.19362	9.21641	8.42607	1.05248	36.9886	76.3621	84.9502	142.854	163.255	127.35	42.486	4.31297	2.17203	-1.1282	3.30023	MAST4	-	-
chr10:105778533-105778663:mpeak_27722|chr10_105726942_105785331_SLK_NM_+|	58.5485	1.63237	0.731076	-2.23284	0.0255598	0.165549	23.1178	24.1144	21.0779	25.3451	22.1184	9.99852	43.1533	41.5303	76.6468	111.749	122.178	181.552	42.3417	13.8303	0.249489	-1.36476	1.61425	SLK	-	-
chr3:138249574-138249625:mpeak_133184|chr3_138213918_138313225_CEP70_NM_-|	17.1703	2.8315	1.37579	-2.05808	0.0395825	NA	0	12.0572	5.10979	2.3041	3.15978	0	9.24714	24.1144	28.1038	34.5615	41.0771	46.3089	41.8943	6.72077	1.65164	-0.988416	2.64005	CEP70	-	-
chr15:59179421-59179492:mpeak_66046|chr15_59172306_59225852_SLTM_NM_-|	40.1129	2.81614	1.15131	-2.44603	0.0144439	0.129124	20.0355	9.37781	22.994	8.06436	5.26629	3.68367	32.365	8.03812	86.8664	78.3395	51.6097	154.714	41.1782	5.977	1.62302	-1.16137	2.78439	SLTM	-	-
chr15:86336365-86336418:mpeak_68927|chr15_86304242_86338189_KLHL25_NM_-|	21.6607	2.29571	1.09645	-2.09377	0.0362808	0.199108	16.9531	12.0572	7.66468	1.15205	3.15978	5.26238	18.4943	36.1715	34.4911	21.889	23.1717	79.4619	41.1353	7.68873	1.93757	-0.481989	2.41956	KLHL25	-	-
chr11:1497479-1497569:mpeak_29764|chr11_1491718_1508009_MOB2_NM_-|	16.8914	2.65314	1.08058	-2.45531	0.0140765	NA	4.62357	12.0572	7.02596	2.3041	5.26629	0.526238	12.3295	22.7747	22.994	32.2574	31.5978	48.9401	40.8045	7.17816	1.5499	-0.957141	2.50704	MOB2	-	-
chr1:223990967-223991023:mpeak_18099|chr1_223968596_224033674_TP53BP2_NM_-|	22.5926	3.18546	1.38286	-2.30353	0.021249	0.151506	16.9531	6.69843	14.6906	3.45615	3.15978	0	13.8707	21.435	58.7626	24.1931	17.9054	89.9867	40.7599	7.51325	2.53492	-0.489689	3.0246	TP53BP2	-	-
chr16:27689036-27689091:mpeak_72813|chr16_27561467_27789894_KIAA0556_NM_+|	22.3287	2.44988	1.23422	-1.98496	0.0471486	0.229116	13.8707	9.37781	3.19362	2.3041	7.37281	2.10495	10.7883	18.7556	36.4072	25.3451	31.5978	106.826	40.0935	7.19419	1.16627	-1.31219	2.47846	KIAA0556	-	-
chr18:13059263-13059316:mpeak_88345|chr18_12991360_13124630_CEP192_NM_+|	15.9676	2.5426	1.07751	-2.35969	0.0182902	NA	10.7883	5.35875	3.83234	4.6082	3.15978	0.526238	16.9531	20.0953	13.4132	39.1697	44.2369	29.4693	39.5933	7.34808	1.26834	-1.16148	2.42982	CEP192	-	-
chr18:21730044-21730204:mpeak_88930|chr18_21718919_21741479_CABYR_NM_+|	10.5815	4.01336	1.5717	-2.55351	0.0106643	NA	6.16476	16.0762	8.30341	0	0	0	26.2002	32.1525	19.1617	5.76025	4.21303	8.94605	39.4048	#DIV/0!	Inf	2.0346	Inf	CABYR	-	-
chr7:98015263-98015522:mpeak_175352|chr7_97922908_98030427_BAIAP2L1_NM_-|	95.3695	1.48457	0.722894	-2.05364	0.0400103	0.210303	57.024	33.4922	58.1238	21.889	24.2249	29.9956	117.13	104.496	155.849	129.03	111.645	301.534	39.3775	14.0369	0.965675	-0.522471	1.48815	BAIAP2L1	-	-
chr8:133787842-133787898:mpeak_188080|chr8_133787603_133858025_PHF20L1_NM_+|	29.2937	2.33774	1.0165	-2.29978	0.0214605	0.152097	30.8238	10.7175	6.38724	8.06436	3.15978	2.10495	36.9886	30.8128	54.2915	51.8423	44.2369	72.0946	39.2558	7.92578	1.84631	-0.461974	2.30828	PHF20L1	-	-
chr5:112457472-112457591:mpeak_154078|chr5_112363179_112824527_MCC_NM_-|	15.274	4.59623	1.86037	-2.4706	0.0134885	NA	1.54119	13.3969	2.55489	1.15205	1.05326	0	6.16476	5.35875	33.2136	17.2808	10.5326	91.0392	39.1016	2.78325	2.98772	-1.40963	4.39735	MCC	-	-
chr12:120171980-120172170:mpeak_49103|chr12_120126060_120315095_CIT_NM_-|	50.7941	1.85824	0.855474	-2.17217	0.0298425	0.179343	27.7414	33.4922	9.58085	14.9767	10.5326	8.41981	43.1533	54.9272	84.9502	74.8833	88.4737	158.398	38.6899	10.545	1.06152	-0.813875	1.8754	CIT	-	-
chr9:132694805-132695025:mpeak_196400|chr9_132652825_132805473_FNBP1_NM_-|	21.2849	4.99704	1.87405	-2.66644	0.00766602	NA	9.24714	17.4159	0	0	1.05326	0	12.3295	28.1334	64.5111	25.3451	38.9706	58.4124	38.0995	2.57461	4.66191	-0.225433	4.88734	FNBP1	-	-
chr12:62782866-62783029:mpeak_44220|chr12_62654120_62797972_USP15_NM_+|	35.0342	2.39473	1.16001	-2.0644	0.0389795	0.207202	32.365	18.7556	10.2196	8.06436	5.26629	0	44.6945	41.5303	81.1179	48.3861	41.0771	88.9342	36.6554	11.2087	2.20209	-0.0922895	2.29437	USP15	-	-
chrX:129786379-129786495:mpeak_201307|chrX_129759419_130037291_ENOX2_NM_-|	16.5507	2.82461	1.33677	-2.11301	0.0346003	NA	13.8707	8.03812	3.83234	2.3041	3.15978	0	16.9531	9.37781	44.0719	32.2574	21.0652	43.6778	36.5627	8.44926	2.23608	-0.462357	2.69844	ENOX2	-	-
chr11:116883225-116883386:mpeak_37435|chr11_116716345_116969131_SIK3_NM_-|	23.6063	1.97576	0.988432	-1.99888	0.045621	0.225041	13.8707	16.0762	3.83234	4.6082	7.37281	1.57871	27.7414	33.4922	31.2975	57.6025	35.8108	49.9926	36.5059	9.45549	1.31681	-0.632096	1.94891	SIK3	-	-
chr5:112548639-112548784:mpeak_154084|chr5_112363179_112824527_MCC_NM_-|	15.174	4.51752	1.77708	-2.5421	0.0110187	NA	3.08238	9.37781	3.83234	1.15205	1.05326	0	6.16476	5.35875	33.2136	17.2808	10.5326	91.0392	36.4184	2.78325	2.88516	-1.40963	4.29479	MCC	-	-
chr2:37126656-37126775:mpeak_99989|chr2_37076768_37193615_STRN_NM_-|	81.1197	1.27543	0.563505	-2.26339	0.0236117	0.159494	50.8593	25.454	32.5749	27.6492	20.0119	25.2594	107.883	88.4193	103.473	148.615	174.841	168.396	36.3232	14.8257	0.57845	-0.714339	1.29279	STRN	-	-
chr12:39713729-39713848:mpeak_41346|chr12_39688319_39837192_KIF21A_NM_-|	17.2956	2.43165	1.20947	-2.01051	0.044377	NA	7.70595	9.37781	5.74851	1.15205	0	5.26238	15.4119	12.0572	35.7685	40.3218	21.0652	53.6763	36.1055	8.36205	1.83168	-0.863572	2.69525	KIF21A	-	-
chr1:108502297-108502358:mpeak_7975|chr1_108115994_108507545_VAV3_NM_-|	144.164	2.3911	1.06171	-2.25212	0.0243149	0.161695	26.2002	73.6828	10.2196	23.041	50.5564	9.47228	83.2243	105.835	120.719	251.147	302.285	673.585	35.5424	6.77005	0.406454	-1.98585	2.3923	VAV3	-	-
chr17:64518552-64518684:mpeak_85710|chr17_64298925_64799990_PRKCA_NM_+|	10.6466	4.21002	1.72663	-2.43829	0.0147569	NA	6.16476	10.7175	2.55489	1.15205	0	0	6.16476	18.7556	30.6587	18.4328	6.31955	26.8381	34.972	6.6992	4.07654	0.107437	3.9691	PRKCA	-	-
chr17:65239900-65239964:mpeak_85834|chr17_65074702_65241319_HELZ_NM_-|	173.898	2.09613	0.912451	-2.29725	0.0216044	0.152674	144.872	89.759	60.04	35.7136	28.438	6.84109	186.484	237.125	430.5	226.954	193.8	446.25	34.5004	8.18828	2.05336	-0.0216189	2.07498	HELZ	-	-
chr13:34439470-34439609:mpeak_52030|chr13_34392205_34540223_RFC3_NM_+|	6.74813	3.71866	1.77733	-2.09227	0.036414	NA	4.62357	6.69843	4.47107	0	0	0	4.62357	22.7747	19.1617	2.3041	9.47933	6.84109	33.9199	#DIV/0!	Inf	1.32189	Inf	RFC3	-	-
chr9:130377175-130377323:mpeak_195970|chr9_130374485_130453053_STXBP1_NM_+|	21.7161	2.34529	1.09036	-2.15093	0.031482	0.18431	15.4119	10.7175	8.30341	2.3041	4.21303	1.57871	43.1533	21.435	37.046	19.5849	23.1717	73.6733	33.8791	6.95341	2.08853	-0.196074	2.2846	STXBP1	-	-
chr15:57286977-57287027:mpeak_65907|chr15_57210832_57578354_TCF12_NM_+|	21.4598	4.47824	1.43982	-3.11028	0.0018691	NA	6.16476	4.01906	9.58085	0	3.15978	0	13.8707	10.7175	33.8523	52.9943	24.2249	98.9328	33.8201	5.38133	2.64503	-1.59178	4.23681	TCF12	-	-
chr16:31086091-31086268:mpeak_73488|chr16_31085742_31094291_ZNF646_NM_+|	26.7634	3.18506	1.50511	-2.11616	0.0343312	0.192946	20.0355	10.7175	7.66468	2.3041	4.21303	0	26.2002	13.3969	74.0919	17.2808	18.9587	126.297	33.7919	6.01447	2.55946	-0.515671	3.07513	ZNF646	-	-
chr3:179071977-179072150:mpeak_136183|chr3_179065479_179109768_MFN1_NM_+|	21.5952	2.87646	1.21129	-2.37471	0.0175629	0.140331	15.4119	10.7175	3.83234	4.6082	2.10652	0	21.5767	22.7747	45.3494	38.0177	33.7043	61.0436	33.4019	7.58637	2.15772	-0.56569	2.72341	MFN1	-	-
chr13:42882686-42882750:mpeak_52756|chr13_42846288_42893223_AKAP11_NM_+|	24.4318	2.48505	0.993133	-2.50223	0.0123412	0.121223	4.62357	12.0572	15.9681	1.15205	3.15978	4.2099	32.365	21.435	46.6268	42.6259	36.8641	72.0946	32.5101	5.62177	1.93781	-0.593978	2.53179	AKAP11	-	-
chr17:76764278-76764397:mpeak_86946|chr17_76672251_76778424_CYTH1_NM_-|	32.353	4.53324	1.373	-3.30169	0.000961037	0.0473525	9.24714	13.3969	1.91617	3.45615	1.05326	0	12.3295	38.8509	24.9102	59.9066	60.0357	163.134	32.2775	2.3895	2.44531	-1.8954	4.34071	CYTH1	-	-
chr11:68682443-68682494:mpeak_34480|chr11_68671318_68707001_IGHMBP2_NM_+|	15.391	5.77835	1.63638	-3.53117	0.000413724	NA	3.08238	17.4159	4.47107	0	0	0	21.5767	21.435	34.4911	19.5849	17.9054	44.7302	32.2174	#DIV/0!	Inf	-0.0852512	Inf	IGHMBP2	-	-
chr17:65595811-65595867:mpeak_85893|chr17_65373396_65688687_PITPNC1_NM_+|	23.9114	2.80778	1.41504	-1.98424	0.0472287	0.2294	1.54119	17.4159	11.497	2.3041	2.10652	2.63119	7.70595	14.7366	72.1758	25.3451	30.5445	98.9328	32.1863	4.54832	2.11262	-0.710423	2.82304	PITPNC1	-	-
chr12:123064468-123064529:mpeak_49668|chr12_123011808_123110751_KNTC1_NM_+|	22.2399	3.45274	1.33437	-2.58755	0.00966614	0.110481	15.4119	5.35875	3.19362	3.45615	1.05326	0.526238	15.4119	14.7366	44.7107	28.8013	37.9173	96.3016	32.0125	3.08897	2.25063	-1.1228	3.37344	KNTC1	-	-
chr6:12099135-12099185:mpeak_159603|chr6_12012723_12163515_HIVEP1_NM_+|	16.0052	2.87679	1.455	-1.97718	0.0480211	NA	3.08238	2.67937	7.02596	2.3041	4.21303	0	4.62357	6.69843	28.7426	31.1054	31.5978	69.9897	31.9178	7.36717	0.972448	-1.72769	2.70014	HIVEP1	-	-
chr7:29605018-29605163:mpeak_171711|chr7_29603426_29605800_PRR15_NM_+|	30.1049	3.83372	1.36153	-2.81574	0.0048665	0.0829749	3.08238	2.67937	7.66468	2.3041	5.26629	0	4.62357	10.7175	26.8264	87.5559	57.9292	152.609	31.8408	3.8094	0.826636	-2.82157	3.6482	PRR15	-	-
chr14:50612188-50612325:mpeak_57564|chr14_50585571_50698099_SOS2_NM_-|	22.7579	3.15889	1.20892	-2.613	0.00897519	0.106684	6.16476	2.67937	10.8583	1.15205	2.10652	3.15743	15.4119	14.7366	31.9362	32.2574	33.7043	118.93	31.7348	3.47014	1.61863	-1.57437	3.193	SOS2	-	-
chr5:66107606-66107659:mpeak_150863|chr5_65892175_66458974_MAST4_NM_+|	59.0509	3.33593	1.01817	-3.2764	0.0010514	0.0487208	15.4119	38.8509	8.30341	6.9123	6.31955	1.05248	36.9886	76.3621	84.9502	142.854	163.255	127.35	31.5511	3.29543	2.13095	-1.1282	3.25915	MAST4	-	-
chr8:66582104-66582243:mpeak_182728|chr8_66556887_66621210_MTFR1_NM_+|	44.8492	3.57375	1.56469	-2.284	0.0223715	0.155199	30.8238	1.33969	18.523	5.76025	3.15978	0	26.2002	33.4922	102.196	47.2341	37.9173	231.545	31.3096	4.22488	2.50648	-0.968102	3.47458	MTFR1	-	-
chr2:44732815-44732956:mpeak_100710|chr2_44589042_44999174_CAMKMT_NM_+|	11.3349	4.36996	1.7677	-2.47211	0.0134318	NA	4.62357	8.03812	4.47107	1.15205	0	0	16.9531	2.67937	35.1298	16.1287	10.5326	36.3104	31.2857	5.48842	3.89448	-0.201522	4.096	CAMKMT	-	-
chr2:233428984-233429069:mpeak_113053|chr2_233415296_233445613_EIF4E2_NM_+|	57.4969	1.99984	0.889652	-2.24789	0.024583	0.162382	33.9062	8.03812	44.0719	9.21641	9.47933	5.26238	72.4359	76.3621	130.938	100.228	71.6216	128.402	30.749	7.97933	1.84409	-0.102106	1.9462	EIF4E2	-	-
chr21:38865416-38865478:mpeak_120210|chr21_38739858_38884213_DYRK1A_NM_+|	46.833	2.57116	0.955606	-2.69061	0.00713211	0.0969802	27.7414	9.37781	7.66468	5.76025	1.05326	9.47228	32.365	56.2668	59.4013	105.989	132.711	114.194	30.2526	4.61494	1.45937	-1.25331	2.71268	DYRK1A	-	-
chr1:197059405-197059527:mpeak_15942|chr1_197053556_197115824_ASPM_NM_-|	26.2021	2.06625	1.00047	-2.06527	0.038897	0.207162	3.08238	10.7175	4.47107	10.3685	4.21303	2.10495	20.0355	22.7747	17.8843	58.7546	56.876	103.143	30.1032	7.62728	0.130874	-1.8498	1.98067	ASPM	-	-
chr1:113617480-113617529:mpeak_8917|chr1_113615791_113666496_LRIG2_NM_+|	39.8653	1.92329	0.756912	-2.54097	0.0110544	0.116017	16.9531	10.7175	14.0519	10.3685	5.26629	6.31486	64.73	42.87	33.2136	111.749	90.5802	71.5684	29.6296	8.0138	0.926631	-0.95985	1.88648	LRIG2	-	-
chr8:363074-363219:mpeak_179771|chr8_356807_418714_FBXO25_NM_+|	46.2424	1.62583	0.721769	-2.25256	0.0242869	0.161657	18.4943	25.454	22.3553	6.9123	5.26629	9.99852	52.4005	68.324	104.112	85.2518	63.1955	93.1441	29.4897	9.1796	1.58002	-0.103693	1.68371	FBXO25	-	-
chr5:65960805-65960994:mpeak_150842|chr5_65892175_66458974_MAST4_NM_+|	58.6525	3.23553	1.45733	-2.22018	0.0264065	0.168126	9.24714	48.2287	0.638724	9.21641	4.21303	0.526238	36.9886	76.3621	84.9502	142.854	163.255	127.35	29.3063	3.21961	2.05805	-1.1282	3.18625	MAST4	-	-
chr5:178149084-178149294:mpeak_158489|chr5_178140622_178157703_ZNF354A_NM_-|	29.7215	3.60232	1.31637	-2.73656	0.00620853	0.0915408	7.70595	13.3969	1.27745	1.15205	5.26629	0	29.2826	21.435	26.1877	84.0997	49.5032	117.351	29.1011	3.83637	1.80195	-1.70627	3.50822	ZNF354A	-	-
chr21:30400183-30400257:mpeak_119509|chr21_30396937_30426386_USP16_NM_+|	30.5281	2.66432	1.2141	-2.19448	0.0282011	0.174203	18.4943	4.01906	13.4132	6.9123	3.15978	0	55.4828	29.4731	38.9621	43.7779	45.2901	107.353	28.9922	7.69172	1.83469	-0.66456	2.49925	USP16	-	-
chr8:81557395-81557451:mpeak_183605|chr8_81553712_81787016_ZNF704_NM_-|	14.7781	3.18775	1.36368	-2.3376	0.0194079	NA	10.7883	4.01906	3.83234	1.15205	2.10652	0	18.4943	9.37781	37.046	24.1931	29.4912	36.8367	28.7127	5.39969	2.51607	-0.479632	2.9957	ZNF704	-	-
chr17:8347573-8347684:mpeak_78752|chr17_8339169_8370247_NDEL1_NM_+|	37.89	3.17241	1.44042	-2.20242	0.0276359	0.172271	21.5767	5.35875	5.74851	3.45615	6.31955	0	15.4119	20.0953	79.2017	74.8833	38.9706	183.657	28.4929	4.92875	1.74131	-1.37497	3.11627	NDEL1	-	-
chr2:160289259-160289388:mpeak_108140|chr2_160176929_160473112_BAZ2B_NM_-|	40.9537	2.02656	0.785017	-2.58155	0.00983588	0.111248	9.24714	14.7366	8.30341	3.45615	13.6924	5.26238	38.5297	34.8319	40.8783	95.6202	105.326	121.561	28.2625	6.94896	0.526757	-1.49726	2.02402	BAZ2B	-	-
chr15:30029454-30029573:mpeak_63412|chr15_29993893_30261002_TJP1_NM_-|	23.3355	3.3935	1.572	-2.15872	0.0308722	0.182372	18.4943	1.33969	8.94213	1.15205	3.15978	0	16.9531	13.3969	71.537	21.889	30.5445	92.6179	28.2431	4.45893	2.7385	-0.509594	3.24809	TJP1	-	-
chr2:86259384-86259466:mpeak_103595|chr2_86254646_86333278_POLR1A_NM_-|	19.6238	2.9141	1.31527	-2.21559	0.0267194	NA	10.7883	5.35875	5.10979	4.6082	1.05326	0	13.8707	20.0953	41.517	35.7136	23.1717	74.1996	28.1611	6.38104	1.90868	-0.818122	2.7268	POLR1A	-	-
chr16:89444390-89444474:mpeak_77183|chr16_89353521_89556969_ANKRD11_NR_-mpeak_77183|chr16_89335071_89556969_ANKRD11_NM_-||	42.8127	2.62852	1.18158	-2.22458	0.0261096	0.167142	3.08238	9.37781	5.74851	10.3685	7.37281	1.57871	13.8707	13.3969	37.6847	81.7956	68.4618	261.014	28.034	4.69762	-0.085466	-2.66264	2.57717	ANKRD11	-	-
chr17:65374561-65374618:mpeak_85855|chr17_65373396_65688687_PITPNC1_NM_+|	23.2746	3.92587	1.6295	-2.40924	0.0159857	0.135291	1.54119	14.7366	10.2196	2.3041	1.05326	0	7.70595	14.7366	72.1758	25.3451	30.5445	98.9328	28.0044	3.25279	2.98045	-0.710423	3.69087	PITPNC1	-	-
chr1:114189691-114189948:mpeak_9007|chr1_113933474_114224833_MAGI3_NM_+|	147.796	2.00601	0.731264	-2.74321	0.00608416	0.0907556	75.5183	77.7018	42.7945	26.4972	24.2249	7.36733	266.626	257.22	178.843	314.51	290.699	211.548	27.895	7.11221	1.75461	-0.217022	1.97164	MAGI3	-	-
chr3:160115453-160115576:mpeak_134966|chr3_159976423_160117320_IFT80_NM_-|	15.4475	3.73654	1.45372	-2.57033	0.0101603	NA	10.7883	2.67937	7.66468	1.15205	1.05326	0	24.659	14.7366	37.6847	20.7369	18.9587	45.2565	27.4161	3.89392	3.2604	-0.140287	3.40069	IFT80	-	-
chr11:116720978-116721168:mpeak_37415|chr11_116716345_116969131_SIK3_NM_-|	21.8555	5.33316	1.40183	-3.80443	0.000142129	0.0248968	10.7883	9.37781	5.10979	0	1.05326	0	27.7414	33.4922	31.2975	57.6025	35.8108	49.9926	27.3162	2.20338	4.58483	-0.632096	5.21693	SIK3	-	-
chr13:42888021-42888087:mpeak_52759|chr13_42846288_42893223_AKAP11_NM_+|	23.6966	2.79783	1.12336	-2.4906	0.0127527	0.122908	18.4943	4.01906	4.47107	1.15205	2.10652	2.10495	32.365	21.435	46.6268	42.6259	36.8641	72.0946	26.8697	3.5383	2.33087	-0.593978	2.92485	AKAP11	-	-
chr2:32696265-32696324:mpeak_99765|chr2_32582095_32842791_BIRC6_NM_+|	33.017	4.54254	1.45924	-3.11295	0.0018523	0.0590226	12.3295	14.7366	3.19362	1.15205	2.10652	0	16.9531	17.4159	78.563	70.2751	42.1303	137.348	26.7946	1.95707	3.21509	-1.14505	4.36014	BIRC6	-	-
chr2:227740369-227740427:mpeak_112679|chr2_227700670_227860146_RHBDD1_NM_+|	23.9774	3.17445	1.34428	-2.36145	0.0182035	0.142192	21.5767	2.67937	1.91617	1.15205	3.15978	0.526238	30.8238	24.1144	42.7945	36.8656	44.2369	77.8832	26.7794	3.04308	2.43553	-0.701985	3.13752	RHBDD1	-	-
chr4:187538214-187538364:mpeak_147690|chr4_187510374_187644987_FAT1_NM_-|	28.9416	4.82326	1.69703	-2.84218	0.00448064	0.0801139	18.4943	6.69843	5.74851	1.15205	1.05326	0	10.7883	14.7366	90.06	32.2574	26.3315	139.979	26.7693	1.66591	3.81048	-0.780682	4.59116	FAT1	-	-
chr3:195050181-195050364:mpeak_137269|chr3_195000157_195163817_ACAP2_NM_-|	48.468	1.82617	0.847078	-2.15585	0.0310954	0.182891	23.1178	22.7747	10.2196	10.3685	9.47933	2.63119	58.5652	62.9653	90.06	95.6202	71.6216	124.192	26.5192	7.71323	1.31974	-0.461894	1.78163	ACAP2	-	-
chr16:89360703-89360844:mpeak_77165|chr16_89353521_89556969_ANKRD11_NR_-mpeak_77165|chr16_89335071_89556969_ANKRD11_NM_-||	42.618	2.50248	1.17471	-2.13029	0.0331475	0.189421	9.24714	6.69843	1.27745	6.9123	7.37281	3.68367	13.8707	13.3969	37.6847	81.7956	68.4618	261.014	26.5164	4.36908	-0.0611545	-2.66264	2.60148	ANKRD11	-	-
chr12:64879713-64879807:mpeak_44524|chr12_64845839_64895109_TBK1_NM_+|	30.1239	3.24901	1.17725	-2.75984	0.00578297	0.0889647	15.4119	5.35875	10.2196	4.6082	2.10652	0	47.7769	18.7556	50.4592	54.1464	47.3966	105.248	26.4893	4.87067	2.20641	-0.821765	3.02818	TBK1	-	-
chr5:57751842-57751983:mpeak_150275|chr5_57750601_57755966_PLK2_NM_-|	138.057	2.91054	1.31558	-2.21236	0.0269416	0.169888	24.659	10.7175	3.19362	34.5615	13.6924	1.05248	27.7414	42.87	75.3694	324.878	289.646	808.302	26.4214	3.46538	-0.354289	-3.28491	2.93062	PLK2	-	-
chr3:33690688-33690742:mpeak_126467|chr3_33540209_33759705_CLASP2_NM_-|	25.5094	3.61612	1.55783	-2.32125	0.0202734	0.148495	9.24714	14.7366	1.27745	0	4.21303	0	47.7769	14.7366	33.2136	28.8013	36.8641	115.246	26.3887	6.98635	2.58399	-0.918285	3.50227	CLASP2	-	-
chr15:50627081-50627175:mpeak_64969|chr15_50570981_50647605_GABPB1_NM_-|	30.8381	2.94867	1.24267	-2.37284	0.0176517	0.14058	10.7883	16.0762	8.94213	0	6.31955	0.526238	46.2357	18.7556	72.1758	57.6025	31.5978	101.038	26.1044	5.39781	2.38694	-0.471871	2.85881	GABPB1	-	-
chr6:17693299-17693459:mpeak_159997|chr6_17616412_17707065_NUP153_NM_-|	38.7867	2.30174	1.06109	-2.16921	0.0300665	0.18011	9.24714	13.3969	6.38724	3.45615	4.21303	7.36733	21.5767	21.435	69.6209	82.9477	49.5032	176.29	25.7752	4.87028	0.949136	-1.45477	2.40391	NUP153	-	-
chr7:2024083-2024234:mpeak_170140|chr7_1855864_2272583_MAD1L1_NM_-|	15.0903	2.7825	1.33837	-2.07902	0.0376155	NA	1.54119	12.0572	3.19362	1.15205	2.10652	0.526238	20.0355	9.37781	35.7685	31.1054	24.2249	39.9941	25.7618	3.97045	2.14948	-0.548377	2.69786	MAD1L1	-	-
chr14:67166528-67166585:mpeak_59482|chr14_66974124_67647520_GPHN_NM_+|	20.1123	2.62354	1.30639	-2.00823	0.0446184	NA	4.62357	13.3969	6.38724	1.15205	4.21303	0	23.1178	21.435	51.7366	18.4328	32.651	64.201	25.3482	6.98065	2.18566	-0.259754	2.44542	GPHN	-	-
chr3:160110301-160110418:mpeak_134965|chr3_159976423_160117320_IFT80_NM_-|	15.3103	3.64887	1.44074	-2.53264	0.0113208	NA	3.08238	9.37781	7.02596	1.15205	1.05326	0	24.659	14.7366	37.6847	20.7369	18.9587	45.2565	25.2803	3.89392	3.1434	-0.140287	3.28368	IFT80	-	-
chr12:112739306-112739552:mpeak_48486|chr12_112600327_112819896_HECTD4_NM_-|	38.6268	2.15767	1.00021	-2.15722	0.0309888	0.182698	18.4943	17.4159	5.10979	1.15205	5.26629	6.31486	36.9886	57.6065	68.3434	48.3861	69.5151	128.928	25.1751	5.1587	1.68773	-0.599187	2.28692	HECTD4	-	-
chr10:114459665-114459723:mpeak_28025|chr10_114206755_114575048_VTI1A_NM_+|	58.1386	1.92668	0.787541	-2.44645	0.014427	0.129124	20.0355	26.7937	19.1617	5.76025	14.7456	3.15743	83.2243	72.3431	107.944	137.094	87.4205	119.982	25.0429	6.86895	1.47962	-0.386624	1.86624	VTI1A	-	-
chr10:114917735-114917831:mpeak_28093|chr10_114710008_114925313_TCF7L2_NM_+|	46.2433	2.0603	0.967886	-2.12866	0.0332828	0.189947	24.659	12.0572	19.1617	5.76025	6.31955	3.68367	55.4828	36.1715	132.855	58.7546	58.9825	141.032	24.889	6.09172	1.82569	-0.204892	2.03058	TCF7L2	-	-
chr7:55467759-55467807:mpeak_173036|chr7_55433140_55498918_LANCL2_NM_+|	44.3755	4.82769	2.10386	-2.29468	0.0217512	0.153171	27.7414	0	0	0	0	0	109.424	71.0034	155.21	50.6902	44.2369	74.1996	24.7959	#DIV/0!	Inf	0.988801	Inf	LANCL2	-	-
chr21:47974794-47974857:mpeak_121139|chr21_47878861_47987282_DIP2A_NM_+|	72.5837	1.61629	0.775684	-2.0837	0.0371878	0.201645	27.7414	26.7937	15.9681	9.21641	16.8521	12.1035	67.8124	140.667	76.0081	102.533	136.924	238.386	24.7825	7.98842	0.885174	-0.748168	1.63334	DIP2A	-	-
chr1:206603046-206603191:mpeak_17134|chr1_206516199_206634381_SRGAP2_NM_+|	42.6317	3.57578	1.18628	-3.01427	0.00257596	0.0655621	3.08238	20.0953	4.47107	1.15205	4.21303	2.10495	27.7414	30.8128	53.0141	56.4505	90.5802	217.863	24.7819	2.04718	1.88803	-1.70955	3.59757	SRGAP2	-	-
chr1:51001033-51001117:mpeak_4730|chr1_50907195_51425936_FAF1_NM_-|	75.8885	1.91618	0.756115	-2.53425	0.0112689	0.117244	32.365	10.7175	36.4072	11.5205	14.7456	6.31486	110.966	80.3812	130.3	158.983	153.776	164.186	24.7134	6.83118	1.28674	-0.568347	1.85509	FAF1	-	-
chr5:65919547-65919911:mpeak_150832|chr5_65892175_66458974_MAST4_NM_+|	57.8648	3.00601	1.4885	-2.01949	0.0434364	0.219408	7.70595	34.8319	6.38724	0	13.6924	0	36.9886	76.3621	84.9502	142.854	163.255	127.35	24.6721	9.47658	1.8372	-1.1282	2.96541	MAST4	-	-
chr4:39313059-39313203:mpeak_139871|chr4_39290464_39368001_RFC1_NM_-|	79.5438	2.12293	0.87945	-2.41393	0.0157814	0.134566	33.9062	14.7366	21.0779	18.4328	11.5858	3.15743	77.0595	79.0415	127.745	175.112	131.657	261.014	24.5629	5.84309	1.07144	-1.00023	2.07167	RFC1	-	-
chr10:114432040-114432098:mpeak_28023|chr10_114206755_114575048_VTI1A_NM_+|	57.7734	1.93437	0.772306	-2.50467	0.0122565	0.120745	21.5767	32.1525	10.2196	9.21641	5.26629	6.84109	83.2243	72.3431	107.944	137.094	87.4205	119.982	24.2679	6.18984	1.58445	-0.386624	1.97108	VTI1A	-	-
chr10:105780319-105780375:mpeak_27724|chr10_105726942_105785331_SLK_NM_+|	53.8834	1.6476	0.745725	-2.2094	0.0271471	0.170677	18.4943	10.7175	9.58085	11.5205	10.5326	8.94605	43.1533	41.5303	76.6468	111.749	122.178	181.552	24.0454	7.46106	0.323554	-1.36476	1.68831	SLK	-	-
chr3:142031434-142031484:mpeak_133576|chr3_142030655_142166904_XRN1_NM_-|	29.7042	2.36604	1.01048	-2.34151	0.0192059	0.145342	7.70595	13.3969	4.47107	2.3041	3.15978	3.68367	36.9886	25.454	45.9881	38.0177	57.9292	117.351	23.5855	4.28862	1.48321	-0.976097	2.45931	XRN1	-	-
chr15:43708548-43708619:mpeak_64432|chr15_43699768_43802707_TP53BP1_NM_-|	154.748	1.59743	0.740938	-2.15595	0.0310876	0.182891	63.1888	45.5493	22.994	24.1931	38.9706	19.4708	177.237	155.404	231.218	301.837	245.409	531.5	23.3626	7.66022	0.672793	-0.935952	1.60874	TP53BP1	-	-
chr5:65934837-65934910:mpeak_150836|chr5_65892175_66458974_MAST4_NM_+|	57.6603	2.91546	1.29133	-2.25771	0.0239635	0.160736	12.3295	29.4731	4.47107	2.3041	11.5858	0	36.9886	76.3621	84.9502	142.854	163.255	127.35	23.3351	4.80666	1.73615	-1.1282	2.86436	MAST4	-	-
chr13:96762389-96762494:mpeak_54659|chr13_96743092_97484743_HS6ST3_NM_+|	46.0696	4.32625	1.94162	-2.22816	0.0258697	0.166436	0	21.435	0	1.15205	0	0	129.46	62.9653	86.2277	85.2518	70.5683	95.7753	23.0771	1.37369	4.21769	0.147364	4.07033	HS6ST3	-	-
chr13:33164714-33164843:mpeak_51888|chr13_33160563_33349154_PDS5B_NM_+|	35.0519	2.61375	1.24157	-2.1052	0.0352738	0.195902	7.70595	6.69843	6.38724	0	10.5326	1.05248	26.2002	20.0953	44.0719	66.8189	54.7695	176.29	23.0079	5.83379	0.843736	-1.72085	2.56458	PDS5B	-	-
chr10:13660097-13660274:mpeak_20896|chr10_13628938_13672259_PRPF18_NM_+|	30.3332	2.47266	1.06178	-2.32878	0.0198706	0.147344	16.9531	17.4159	6.38724	2.3041	4.21303	0	70.8947	38.8509	68.3434	44.93	47.3966	46.3089	22.8853	7.05137	2.64471	0.361302	2.28341	PRPF18	-	-
chrX:80457691-80457756:mpeak_200238|chrX_80457302_80552693_SH3BGRL_NM_+|	88.1045	1.82409	0.727951	-2.50579	0.0122179	0.120569	55.4828	33.4922	33.8523	14.9767	3.15978	6.31486	158.743	147.366	232.495	112.901	119.018	139.453	22.8048	6.58404	2.32865	0.536357	1.79229	SH3BGRL	-	-
chr4:159159342-159159420:mpeak_146575|chr4_159131400_159174595_TMEM144_NM_+|	16.6009	3.25203	1.57904	-2.0595	0.0394468	NA	4.62357	16.0762	1.27745	2.3041	0	0	16.9531	46.889	32.5749	25.3451	23.1717	29.9956	22.794	8.8041	3.25374	0.296368	2.95737	TMEM144	-	-
chr12:107471974-107472179:mpeak_47859|chr12_107385779_107487635_CRY1_NM_-|	25.5527	5.21257	1.73665	-3.0015	0.00268654	0.0666637	10.7883	13.3969	0	0	0	0	61.6476	36.1715	61.9562	36.8656	40.0238	45.7827	22.7055	#DIV/0!	Inf	0.381237	Inf	CRY1	-	-
chr3:122954148-122954360:mpeak_131702|chr3_122920773_122990368_SEC22A_NM_+|	38.7984	2.95337	1.11097	-2.65838	0.00785177	0.100769	7.70595	20.0953	7.02596	3.45615	5.26629	0	40.0709	36.1715	77.2856	92.1641	66.3553	109.984	22.6846	4.87282	1.99741	-0.806437	2.80385	SEC22A	-	-
chr17:65375705-65375757:mpeak_85856|chr17_65373396_65688687_PITPNC1_NM_+|	22.825	3.63558	1.61467	-2.25159	0.0243483	0.161729	1.54119	10.7175	8.94213	1.15205	2.10652	0	7.70595	14.7366	72.1758	25.3451	30.5445	98.9328	22.4067	3.15707	2.70181	-0.710423	3.41223	PITPNC1	-	-
chr1:175952537-175952689:mpeak_14669|chr1_175914306_176176380_RFWD2_NM_-|	37.4362	3.12759	1.13747	-2.74959	0.0059669	0.0902198	10.7883	12.0572	7.66468	4.6082	3.15978	0	32.365	28.1334	77.9243	84.0997	54.7695	133.664	22.0413	4.27542	1.97368	-0.977354	2.95103	RFWD2	-	-
chr18:24116664-24116714:mpeak_89032|chr18_24035865_24237365_KCTD1_NM_-|	28.8507	4.98009	2.04707	-2.43279	0.0149829	0.131615	0	0	10.8583	0	0	0	24.659	20.0953	104.751	31.1054	34.7575	119.982	21.7885	#DIV/0!	Inf	-0.313908	Inf	KCTD1	-	-
chr13:42142752-42142985:mpeak_52585|chr13_42142441_42535221_VWA8_NM_-|	14.7127	4.96893	1.63501	-3.03909	0.00237296	NA	0	2.67937	8.30341	0	0	0	21.5767	25.454	28.7426	21.889	30.5445	37.3629	21.7414	#DIV/0!	Inf	-0.244968	Inf	VWA8	-	-
chr19:53129977-53130051:mpeak_96535|chr19_53118050_53193834_ZNF83_NM_-|	28.9957	2.96329	1.08982	-2.71907	0.00654652	0.0933985	7.70595	14.7366	3.19362	0	2.10652	2.63119	32.365	54.9272	30.6587	62.2107	87.4205	49.9926	21.7346	3.55998	2.43592	-0.759098	3.19501	ZNF83	-	-
chr2:227751109-227751167:mpeak_112681|chr2_227700670_227860146_RHBDD1_NM_+|	23.2565	5.10003	1.63486	-3.11955	0.00181124	0.0586438	13.8707	6.69843	0.638724	1.15205	0	0	30.8238	24.1144	42.7945	36.8656	44.2369	77.8832	21.6999	2.17388	4.20232	-0.701985	4.90431	RHBDD1	-	-
chr3:24378777-24378865:mpeak_125919|chr3_24164616_24536313_THRB_NM_-|	29.3898	4.36104	1.39017	-3.13704	0.00170661	0.0577771	20.0355	1.33969	10.2196	1.15205	1.05326	0	40.0709	65.6446	43.4332	57.6025	50.5564	61.5699	21.1834	1.94897	3.84063	-0.186479	4.02711	THRB	-	-
chr16:67284173-67284252:mpeak_74667|chr16_67282854_67304640_SLC9A5_NM_+|	12.3372	4.39088	1.50209	-2.92318	0.00346482	NA	6.16476	4.01906	7.66468	0	0	0	32.365	21.435	30.6587	11.5205	17.9054	16.3134	21.1328	#DIV/0!	Inf	0.884812	Inf	SLC9A5	-	-
chr1:169818175-169818293:mpeak_14134|chr1_169764549_169821930_C1orf112_NM_+|	24.0831	2.60025	1.21988	-2.13156	0.0330433	0.189023	4.62357	9.37781	3.19362	0	3.15978	2.63119	15.4119	17.4159	48.543	41.4738	40.0238	103.143	21.1316	4.70452	1.57011	-1.18213	2.75225	C1orf112	-	-
chr10:112680415-112680514:mpeak_27921|chr10_112679300_112771367_SHOC2_NM_+|	47.0485	3.68228	1.36732	-2.69307	0.00707975	0.0966824	29.2826	8.03812	5.10979	2.3041	3.15978	0	43.1533	24.1144	139.242	93.3161	69.5151	147.347	20.5465	2.6423	2.95711	-0.586888	3.54399	SHOC2	-	-
chr12:107410929-107411094:mpeak_47849|chr12_107385779_107487635_CRY1_NM_-|	26.6857	1.98522	0.967475	-2.05196	0.0401731	0.21071	15.4119	10.7175	6.38724	0	2.10652	3.15743	61.6476	36.1715	61.9562	36.8656	40.0238	45.7827	20.3515	6.4366	2.62696	0.381237	2.24572	CRY1	-	-
chr17:65531959-65532124:mpeak_85875|chr17_65373396_65688687_PITPNC1_NM_+|	22.4723	5.02537	1.77103	-2.83754	0.00454632	0.0805891	4.62357	10.7175	3.83234	0	1.05326	0	7.70595	14.7366	72.1758	25.3451	30.5445	98.9328	20.264	2.0409	4.18617	-0.710423	4.8966	PITPNC1	-	-
chr16:89503870-89503934:mpeak_77204|chr16_89353521_89556969_ANKRD11_NR_-mpeak_77204|chr16_89335071_89556969_ANKRD11_NM_-||	42.1878	2.32731	1.12422	-2.07015	0.0384382	0.205372	4.62357	4.01906	4.47107	6.9123	7.37281	2.63119	13.8707	13.3969	37.6847	81.7956	68.4618	261.014	20.1897	4.11317	-0.36734	-2.66264	2.2953	ANKRD11	-	-
chr1:148565730-148565873:mpeak_11263|chr1_148558187_148594396_NBPF15_NM_+|	56.163	2.0721	1.01935	-2.03277	0.042076	0.215451	13.8707	14.7366	8.94213	3.45615	11.5858	5.26238	43.1533	36.1715	107.306	85.2518	81.1009	263.119	20.1197	4.72776	0.886999	-1.20238	2.08938	NBPF15	-	-
chr3:24535166-24535269:mpeak_125944|chr3_24164616_24536313_THRB_NM_-|	29.6406	2.41844	1.03692	-2.33233	0.0196833	0.146744	4.62357	18.7556	6.38724	2.3041	4.21303	0.526238	40.0709	65.6446	43.4332	57.6025	50.5564	61.5699	19.9575	4.14978	2.07935	-0.186479	2.26583	THRB	-	-
chrX:48775411-48775462:mpeak_198999|chrX_48771571_48776413_PIM2_NM_-|	18.7719	3.24085	1.49223	-2.17182	0.029869	NA	13.8707	5.35875	3.19362	1.15205	1.05326	0	24.659	21.435	66.4273	20.7369	23.1717	44.204	19.9279	3.75425	3.34593	0.352778	2.99315	PIM2	-	-
chr2:48117273-48117335:mpeak_101164|chr2_48035386_48132932_FBXO11_NM_-|	26.2693	4.63405	1.5902	-2.91414	0.00356674	0.0738954	0	10.7175	5.10979	0	1.05326	0	29.2826	28.1334	64.5111	43.7779	45.2901	87.3555	19.4714	1.79102	3.90948	-0.533024	4.44251	FBXO11	-	-
chr12:6672895-6672957:mpeak_39127|chr12_6666808_6677498_NOP2_NM_-|	61.8109	2.00373	0.995658	-2.01247	0.0441705	0.22146	29.2826	9.37781	10.8583	10.3685	9.47933	1.05248	78.6007	65.6446	111.138	165.895	93.74	156.293	19.39	5.02497	1.24445	-0.70367	1.94812	NOP2	-	-
chr13:40172693-40172761:mpeak_52333|chr13_39918191_40177356_LHFP_NM_-|	22.786	3.20732	1.3189	-2.4318	0.0150238	0.131638	9.24714	9.37781	3.19362	2.3041	1.05326	0	24.659	28.1334	60.04	32.2574	31.5978	71.5684	19.3371	3.71873	2.70016	-0.263296	2.96345	LHFP	-	-
chr1:29016623-29016705:mpeak_2595|chr1_28995239_29040584_GMEB1_NM_+|	45.8768	2.65814	1.15206	-2.30729	0.0210385	0.150887	7.70595	6.69843	8.30341	6.9123	6.31955	0	38.5297	22.7747	56.8464	104.837	78.9944	212.6	19.2193	5.00662	0.779172	-1.74644	2.52561	GMEB1	-	-
chr10:105135349-105135455:mpeak_27650|chr10_105127723_105147762_TAF5_NM_+|	19.6925	2.86525	1.24007	-2.31056	0.0208574	NA	3.08238	4.01906	7.66468	0	2.10652	1.57871	23.1178	16.0762	37.6847	35.7136	25.2782	79.9882	19.207	3.92102	2.00246	-0.874833	2.8773	TAF5	-	-
chr7:151902258-151902314:mpeak_179219|chr7_151834009_152133090_KMT2C_NM_-|	39.0084	1.88248	0.949965	-1.98163	0.0475211	0.230151	12.3295	12.0572	2.55489	3.45615	4.21303	5.26238	30.8238	44.2097	69.6209	71.4271	96.8998	115.246	18.6248	4.56022	1.05894	-0.971111	2.03005	KMT2C	-	-
chr5:65965110-65965173:mpeak_150844|chr5_65892175_66458974_MAST4_NM_+|	56.2496	3.75492	1.51689	-2.47541	0.0133084	0.124952	6.16476	29.4731	1.27745	0	6.31955	0	36.9886	76.3621	84.9502	142.854	163.255	127.35	18.6158	4.37381	2.54633	-1.1282	3.67453	MAST4	-	-
chr5:66202908-66203080:mpeak_150872|chr5_65892175_66458974_MAST4_NM_+|	56.7122	2.86262	1.09847	-2.60599	0.00916078	0.107724	7.70595	21.435	7.66468	4.6082	7.37281	0	36.9886	76.3621	84.9502	142.854	163.255	127.35	18.5605	4.14607	1.61918	-1.1282	2.74738	MAST4	-	-
chr6:17640859-17640941:mpeak_159988|chr6_17616412_17707065_NUP153_NM_-|	37.7046	2.33831	1.14761	-2.03755	0.0415951	0.214059	12.3295	5.35875	3.19362	2.3041	3.15978	4.73614	21.5767	21.435	69.6209	82.9477	49.5032	176.29	18.5398	3.30375	1.03368	-1.45477	2.48845	NUP153	-	-
chr8:53596439-53596540:mpeak_182153|chr8_53536419_53627026_RB1CC1_NM_-|	26.6361	3.23411	1.19018	-2.71733	0.00658108	0.0937028	13.8707	8.03812	6.38724	0	3.15978	0	72.4359	38.8509	41.517	43.7779	40.0238	51.5713	18.5179	7.00237	3.16271	0.17474	2.98797	RB1CC1	-	-
chr13:33275535-33275580:mpeak_51922|chr13_33160563_33349154_PDS5B_NM_+|	34.5931	2.45414	1.0351	-2.37091	0.0177442	0.140928	6.16476	4.01906	6.38724	3.45615	4.21303	2.63119	26.2002	20.0953	44.0719	66.8189	54.7695	176.29	18.3374	3.45792	0.685968	-1.72085	2.40682	PDS5B	-	-
chr5:65916873-65916966:mpeak_150829|chr5_65892175_66458974_MAST4_NM_+|	55.89	4.98438	1.11324	-4.47735	7.55744e-06	0.00909812	15.4119	9.37781	11.497	0	2.10652	0.526238	36.9886	76.3621	84.9502	142.854	163.255	127.35	18.2988	0.911074	3.7848	-1.1282	4.913	MAST4	-	-
chr12:112722031-112722094:mpeak_48478|chr12_112600327_112819896_HECTD4_NM_-|	36.9018	4.04127	1.25196	-3.22797	0.00124674	0.0522001	9.24714	16.0762	4.47107	1.15205	2.10652	0	36.9886	57.6065	68.3434	48.3861	69.5151	128.928	18.2857	1.98025	3.19273	-0.599187	3.79192	HECTD4	-	-
chr2:201324484-201324537:mpeak_110739|chr2_201170603_201342358_SPATS2L_NM_+|	28.2385	3.48621	1.52359	-2.28816	0.0221284	0.154553	9.24714	9.37781	5.74851	2.3041	1.05326	0	23.1178	13.3969	97.7247	31.1054	25.2782	120.509	18.1567	2.84696	2.85991	-0.398061	3.25797	SPATS2L	-	-
chr12:27829439-27829538:mpeak_40746|chr12_27677044_27845728_PPFIBP1_NM_+|	65.0276	1.91649	0.867559	-2.20906	0.0271703	0.170753	12.3295	13.3969	26.1877	5.76025	8.42607	6.31486	49.3181	84.4003	155.21	103.685	115.858	199.444	17.9678	4.89303	1.34042	-0.536195	1.87661	PPFIBP1	-	-
chr3:135806717-135806783:mpeak_132921|chr3_135684514_135863884_PPP2R3A_NM_+|	57.2512	2.22691	1.00968	-2.20555	0.0274153	0.171573	27.7414	21.435	18.523	6.9123	3.15978	0	163.366	111.194	104.112	103.685	84.2607	42.6253	17.8781	6.55249	2.74878	0.715741	2.03304	PPP2R3A	-	-
chr2:86389091-86389152:mpeak_103636|chr2_86372004_86422893_IMMT_NM_-|	231.038	1.63709	0.689717	-2.37356	0.0176175	0.14058	103.26	69.6637	62.5949	31.1054	17.9054	15.7871	437.698	305.449	595.29	285.709	298.072	549.919	17.5965	5.71562	1.86182	0.239511	1.62231	IMMT	-	-
chr16:8895636-8895802:mpeak_70990|chr16_8891669_8941580_PMM2_NM_+|	132.348	1.38428	0.665978	-2.07857	0.0376568	0.203166	38.5297	42.87	30.02	24.1931	12.6391	15.7871	254.296	135.308	247.825	357.136	224.344	205.233	17.4795	6.6885	1.08234	-0.303571	1.38591	PMM2	-	-
chr12:31478948-31479011:mpeak_40976|chr12_31435805_31479159_FAM60A_NM_-|	111.177	2.08557	0.970739	-2.14843	0.0316794	0.184854	47.7769	17.4159	21.0779	9.21641	8.42607	11.5772	123.295	111.194	259.322	129.03	120.071	475.719	17.4704	4.0313	1.56193	-0.553665	2.11559	FAM60A	-	-
chr2:101186026-101186125:mpeak_104620|chr2_101179417_101192815_PDCL3_NM_+|	35.1757	1.96324	0.968404	-2.02729	0.0426329	0.217055	7.70595	18.7556	8.30341	1.15205	1.05326	4.73614	63.1888	54.9272	81.1179	62.2107	37.9173	81.0407	17.4493	3.83148	2.32432	0.137129	2.1872	PDCL3	-	-
chr15:65321737-65321793:mpeak_66661|chr15_65295594_65321977_MTFMT_NM_-|	18.6938	4.12148	1.76003	-2.34171	0.0191955	NA	12.3295	2.67937	3.19362	1.15205	0	0	35.4474	9.37781	61.3175	23.041	12.6391	63.1486	17.1491	3.49711	3.98186	0.103003	3.87886	MTFMT	-	-
chr19:53137916-53137966:mpeak_96547|chr19_53118050_53193834_ZNF83_NM_-|	28.4125	3.66776	1.21243	-3.02513	0.00248526	0.0648318	7.70595	8.03812	4.47107	0	3.15978	0	32.365	54.9272	30.6587	62.2107	87.4205	49.9926	17.1386	4.7486	2.67754	-0.759098	3.43664	ZNF83	-	-
chr17:17127859-17127917:mpeak_79440|chr17_17117170_17140502_FLCN_NM_-|	66.0596	2.96448	1.30301	-2.27511	0.0228994	0.1569	15.4119	18.7556	2.55489	5.76025	6.31955	0	38.5297	52.2478	123.912	137.094	110.592	281.537	17.1049	3.42383	1.60406	-1.30162	2.90569	FLCN	-	-
chr13:24308340-24308478:mpeak_51082|chr13_24304584_24463587_MIPEP_NM_-|	55.1234	2.4104	1.10093	-2.18942	0.0285661	0.175359	23.1178	18.7556	12.1357	4.6082	5.26629	0	89.389	61.6256	167.346	70.2751	61.089	147.873	16.9648	5.30436	2.45143	0.18917	2.26226	MIPEP	-	-
chr2:48071708-48071860:mpeak_101150|chr2_48035386_48132932_FBXO11_NM_-|	27.2226	2.05136	1.04463	-1.96372	0.0495625	0.236045	6.16476	9.37781	5.10979	3.45615	3.15978	1.05248	29.2826	28.1334	64.5111	43.7779	45.2901	87.3555	16.9383	4.34659	1.42931	-0.533024	1.96233	FBXO11	-	-
chr3:153886724-153886841:mpeak_134450|chr3_153838791_153973119_ARHGEF26_NM_+|	52.7328	3.52568	0.952893	-3.69998	0.00021562	0.0297528	20.0355	10.7175	15.9681	2.3041	3.15978	0	107.883	99.1368	72.1758	101.38	83.2074	116.825	16.7341	2.71913	3.09608	-0.110463	3.20654	ARHGEF26	-	-
chr5:66237775-66237878:mpeak_150881|chr5_65892175_66458974_MAST4_NM_+|	56.2412	3.04775	1.04341	-2.92096	0.00348954	0.073312	6.16476	17.4159	9.58085	5.76025	4.21303	0	36.9886	76.3621	84.9502	142.854	163.255	127.35	16.7228	3.45129	1.73337	-1.1282	2.86157	MAST4	-	-
chr22:51209182-51209248:mpeak_124231|chr22_51207302_51222087_RABL2B_NM_-|	92.2556	2.05483	0.873306	-2.35293	0.0186259	0.143419	27.7414	48.2287	15.9681	11.5205	5.26629	1.57871	164.907	175.499	220.36	160.135	153.776	122.087	16.3951	4.21229	2.32367	0.363077	1.96059	RABL2B	-	-
chr6:167424300-167424388:mpeak_169760|chr6_167412804_167453391_FGFR1OP_NM_+|	26.3683	4.26112	1.61849	-2.63277	0.00846911	0.104347	7.70595	0	7.02596	1.15205	0	0	47.7769	25.454	64.5111	32.2574	40.0238	90.5129	16.0429	2.12302	3.67667	-0.241081	3.91775	FGFR1OP	-	-
chr17:55504542-55504595:mpeak_83314|chr17_55333930_55756909_MSI2_NM_+|	25.125	5.29216	1.69558	-3.12115	0.00180148	0.0586438	18.4943	5.35875	0.638724	0	0	0	53.9416	53.5875	45.3494	59.9066	29.4912	34.7317	16.0204	#DIV/0!	Inf	0.300538	Inf	MSI2	-	-
chr6:17634285-17634525:mpeak_159985|chr6_17616412_17707065_NUP153_NM_-|	37.336	2.60528	1.30748	-1.99259	0.0463058	0.22677	6.16476	8.03812	3.83234	2.3041	6.31955	0	21.5767	21.435	69.6209	82.9477	49.5032	176.29	16.0124	4.18976	1.06445	-1.45477	2.51922	NUP153	-	-
chr11:128983718-128983983:mpeak_38320|chr11_128841054_129062093_ARHGAP32_NM_-|	56.2314	2.41227	1.0487	-2.30025	0.0214339	0.152044	10.7883	8.03812	3.19362	4.6082	9.47933	1.05248	30.8238	42.87	63.8724	122.117	127.444	250.489	16.0069	3.02769	0.540453	-1.86195	2.4024	ARHGAP32	-	-
chr2:160290083-160290225:mpeak_108142|chr2_160176929_160473112_BAZ2B_NM_-|	38.5836	2.80563	0.894827	-3.13539	0.00171624	0.0579063	4.62357	2.67937	10.8583	2.3041	3.15978	2.63119	38.5297	34.8319	40.8783	95.6202	105.326	121.561	15.8975	2.51004	1.16575	-1.49726	2.66301	BAZ2B	-	-
chr8:131217406-131217491:mpeak_187992|chr8_131067051_131455906_ASAP1_NM_-|	62.4512	2.90114	1.18298	-2.4524	0.0141906	0.128506	16.9531	25.454	7.66468	2.3041	6.31955	0	73.9771	72.3431	170.539	74.8833	97.9531	201.023	15.8025	3.45999	2.53763	-0.238653	2.77628	ASAP1	-	-
chr8:123972727-123972870:mpeak_187005|chr8_123793900_123985481_ZHX2_NM_+|	27.7171	3.03151	1.18138	-2.56609	0.0102853	0.113106	10.7883	9.37781	5.74851	1.15205	2.10652	0	46.2357	48.2287	69.6209	47.2341	28.438	63.6748	15.7934	3.50769	2.99146	0.235765	2.75569	ZHX2	-	-
chr11:73088179-73088229:mpeak_34977|chr11_73087404_73106488_RELT_NM_+|	21.3309	4.65123	1.67329	-2.77968	0.00544118	NA	4.62357	0	9.58085	0	0	0	35.4474	48.2287	52.3753	35.7136	15.7989	54.2025	15.6607	#DIV/0!	Inf	0.363972	Inf	RELT	-	-
chr13:110421710-110421849:mpeak_55265|chr13_110408655_110438914_IRS2_NM_-|	44.2163	2.27015	1.12957	-2.00975	0.0444579	0.221814	18.4943	16.0762	7.66468	1.15205	6.31955	0	83.2243	52.2478	135.409	85.2518	49.5032	75.252	15.5918	5.33668	2.49896	0.367224	2.13173	IRS2	-	-
chr2:71616428-71616482:mpeak_102804|chr2_71558884_71661871_ZNF638_NM_+|	42.1427	2.67476	0.982687	-2.72188	0.00649115	0.0931009	9.24714	9.37781	5.74851	4.6082	4.21303	0	38.5297	62.9653	54.9302	112.901	86.3672	116.825	15.5815	4.18606	1.46626	-1.01488	2.48113	ZNF638	-	-
chr16:3916818-3916914:mpeak_70729|chr16_3779875_3930121_CREBBP_NM_-|	65.7385	3.1237	1.17714	-2.65365	0.00796273	0.101126	6.16476	22.7747	8.30341	3.45615	6.31955	0	50.8593	69.6637	119.441	112.901	119.018	269.96	15.5202	2.92173	1.92969	-1.06452	2.99421	CREBBP	-	-
chrX:20284671-20284732:mpeak_198121|chrX_20173638_20284750_RPS6KA3_NM_-|	38.5534	2.11708	0.938933	-2.25477	0.0241475	0.161409	15.4119	6.69843	10.8583	0	5.26629	2.10495	101.719	45.5493	67.066	73.7313	61.089	73.1471	15.3819	5.31664	2.16111	0.0435027	2.11761	RPS6KA3	-	-
chr21:47801594-47801734:mpeak_121098|chr21_47744035_47865196_PCNT_NM_+|	42.0082	2.24235	1.1201	-2.00191	0.0452939	0.224298	6.16476	6.69843	5.10979	8.06436	3.15978	1.05248	18.4943	33.4922	65.1498	71.4271	86.3672	198.918	15.3437	3.4416	0.549918	-1.60657	2.15649	PCNT	-	-
chr1:42725306-42725509:mpeak_4007|chr1_42645496_42801548_FOXJ3_NM_-|	54.3736	2.12617	1.02462	-2.07508	0.0379793	0.204089	7.70595	22.7747	3.83234	5.76025	6.31955	1.57871	64.73	65.6446	94.5311	123.269	78.9944	177.342	15.2566	3.59808	1.32895	-0.755183	2.08414	FOXJ3	-	-
chr15:64466929-64467069:mpeak_66519|chr15_64464184_64648442_CSNK1G1_NM_-|	163.011	1.8216	0.873207	-2.08611	0.0369689	0.201007	32.365	71.0034	44.7107	10.3685	21.0652	3.15743	265.085	430.039	293.174	217.738	188.533	378.891	14.9832	4.40559	2.0979	0.331956	1.76594	CSNK1G1	-	-
chr21:38342053-38342103:mpeak_120098|chr21_38126718_38362545_HLCS_NM_-|	22.1005	4.48452	1.44488	-3.10373	0.00191101	0.0598724	7.70595	2.67937	5.10979	1.15205	0	0	30.8238	24.1144	49.8204	43.7779	49.5032	50.5189	14.7913	2.40344	3.74954	-0.456994	4.20653	HLCS	-	-
chr7:140944440-140944568:mpeak_178550|chr7_140774031_141170335_TMEM178B_NM_+|	55.3837	2.58601	1.12453	-2.29962	0.0214695	0.152127	9.24714	22.7747	4.47107	3.45615	6.31955	0	86.3066	71.0034	91.9762	110.597	93.74	164.713	14.6389	3.97333	1.90034	-0.566011	2.46635	TMEM178B	-	-
chr5:65939224-65939277:mpeak_150838|chr5_65892175_66458974_MAST4_NM_+|	55.3257	4.53347	1.32992	-3.40883	0.000652427	0.041194	3.08238	21.435	4.47107	0	3.15978	0	36.9886	76.3621	84.9502	142.854	163.255	127.35	14.6184	2.1869	3.19758	-1.1282	4.32579	MAST4	-	-
chr22:32143615-32143670:mpeak_122637|chr22_32081789_32146120_PRR14L_NM_-|	57.7614	2.49951	1.05551	-2.36807	0.0178813	0.141131	18.4943	9.37781	7.02596	4.6082	5.26629	1.05248	52.4005	71.0034	117.525	92.1641	73.7281	240.491	14.4848	2.68884	1.67525	-0.754232	2.42948	PRR14L	-	-
chr5:66210285-66210370:mpeak_150875|chr5_65892175_66458974_MAST4_NM_+|	54.5932	3.51977	1.33667	-2.63323	0.0084576	0.104321	0	13.3969	5.74851	0	4.21303	0	36.9886	76.3621	84.9502	142.854	163.255	127.35	14.4821	2.91587	2.18406	-1.1282	3.31227	MAST4	-	-
chr14:99947058-99947126:mpeak_62363|chr14_99865462_99947226_SETD3_NM_-|	295.834	1.39423	0.605862	-2.30123	0.0213786	0.152002	75.5183	73.6828	84.3115	35.7136	34.7575	19.997	517.84	440.757	654.053	495.382	364.428	753.573	14.4801	5.60736	1.36802	-0.000655224	1.36867	SETD3	-	-
chrX:151998261-151998312:mpeak_201828|chrX_151996474_151999301_CETN2_NM_-|	189.246	1.9698	0.909265	-2.16636	0.0302834	0.180932	80.1419	24.1144	67.066	18.4328	9.47933	5.26238	369.886	226.407	595.29	195.849	233.823	445.197	14.3777	3.79194	2.36856	0.44574	1.92282	CETN2	-	-
chr13:40043541-40043622:mpeak_52322|chr13_39918191_40177356_LHFP_NM_-|	22.2132	3.4542	1.43318	-2.41017	0.0159451	0.135126	7.70595	4.01906	4.47107	0	2.10652	0	24.659	28.1334	60.04	32.2574	31.5978	71.5684	14.3541	4.66651	2.94271	-0.263296	3.20601	LHFP	-	-
chr1:151038047-151038159:mpeak_11944|chr1_151032150_151039694_MLLT11_NM_+|	45.9567	2.75796	1.18083	-2.33562	0.0195113	0.146321	12.3295	18.7556	5.74851	0	2.10652	2.63119	77.0595	61.6256	118.164	59.9066	32.651	160.503	14.3406	2.80825	2.95876	0.0214391	2.93732	MLLT11	-	-
chr1:12380763-12380819:mpeak_1071|chr1_12290095_12568946_VPS13D_NM_+|	46.9073	2.47598	1.1801	-2.0981	0.035896	0.197921	0	9.37781	7.02596	1.15205	1.05326	3.68367	52.4005	30.8128	88.7826	74.8833	101.113	192.603	14.306	1.59766	1.47794	-1.09968	2.57762	VPS13D	-	-
chr7:108210495-108210553:mpeak_176604|chr7_108210188_108213342_DNAJB9_NM_+|	39.6131	6.10392	1.96429	-3.10745	0.0018871	0.0596524	3.08238	0	10.2196	0	0	0	23.1178	17.4159	99.0022	59.9066	27.3847	235.228	14.2995	#DIV/0!	Inf	-1.20875	Inf	DNAJB9	-	-
chr3:121221231-121221281:mpeak_131424|chr3_121151264_121264853_POLQ_NM_-|	24.9219	4.71331	1.42211	-3.31431	0.000918686	0.0467999	4.62357	6.69843	4.47107	0	1.05326	0	49.3181	33.4922	28.1038	57.6025	43.1836	70.5159	14.239	1.84456	3.90636	-0.6271	4.53346	POLQ	-	-
chr3:134090284-134090339:mpeak_132856|chr3_134076605_134094259_AMOTL2_NM_-|	55.6018	3.54355	1.51783	-2.33462	0.019563	0.146571	0	1.33969	8.94213	3.45615	2.10652	0	24.659	25.454	59.4013	88.7079	85.314	367.84	14.0828	1.53988	0.886246	-2.30681	3.19305	AMOTL2	-	-
chr12:122985182-122985236:mpeak_49627|chr12_122958822_122985620_ZCCHC8_NM_-|	45.7955	3.40664	1.3909	-2.44923	0.014316	0.128856	18.4943	2.67937	0.638724	2.3041	2.10652	0.526238	55.4828	30.8128	69.6209	79.4915	84.2607	203.128	13.9898	1.34563	2.14348	-1.23453	3.37802	ZCCHC8	-	-
chr16:14700346-14700394:mpeak_71550|chr16_14530629_14724128_PARN_NM_-|	55.0739	2.24222	1.13265	-1.97962	0.0477463	0.230783	10.7883	6.69843	12.1357	3.45615	6.31955	2.63119	29.2826	38.8509	143.713	111.749	57.9292	237.333	13.983	3.04829	1.25555	-0.942052	2.1976	PARN	-	-
chr8:123909070-123909127:mpeak_186986|chr8_123793900_123985481_ZHX2_NM_+|	27.5614	2.39222	1.13958	-2.09921	0.0357983	0.197686	7.70595	10.7175	4.47107	2.3041	2.10652	0	46.2357	48.2287	69.6209	47.2341	28.438	63.6748	13.9528	4.74781	2.37595	0.235765	2.14018	ZHX2	-	-
chr4:1725134-1725298:mpeak_138062|chr4_1723216_1746674_TACC3_NM_+|	517.293	1.59673	0.7549	-2.11516	0.0344164	0.192981	103.26	84.4003	107.306	71.4271	64.2488	30.5218	491.64	547.932	1096.05	1043.76	689.884	1877.09	13.8117	4.60288	0.827646	-0.757636	1.58528	TACC3	-	-
chr14:103363565-103363691:mpeak_62788|chr14_103243815_103371549_TRAF3_NM_+|	55.5515	2.47395	1.10738	-2.23406	0.025479	0.165205	10.7883	9.37781	10.8583	5.76025	5.26629	0	47.7769	56.2668	121.357	105.989	84.2607	208.917	13.7641	4.1436	1.49242	-0.824493	2.31692	TRAF3	-	-
chr12:93214077-93214243:mpeak_46586|chr12_93169909_93323107_EEA1_NM_-|	26.9919	2.63548	1.19536	-2.20476	0.027471	0.171705	6.16476	9.37781	2.55489	0	4.21303	0	49.3181	37.5112	44.7107	55.2984	46.3434	68.4109	13.7581	7.43246	2.10286	-0.370481	2.47334	EEA1	-	-
chr11:34219288-34219345:mpeak_31772|chr11_34174131_34379555_ABTB2_NM_-|	39.1197	5.07008	1.80071	-2.81559	0.00486871	0.0829749	6.16476	17.4159	0	0	0	0	60.1064	89.759	111.777	42.6259	40.0238	101.564	13.5189	#DIV/0!	Inf	0.506214	Inf	ABTB2	-	-
chr15:51285562-51285751:mpeak_65184|chr15_51200868_51294698_AP4E1_NM_+|	82.6727	1.90872	0.817893	-2.3337	0.0196113	0.146655	29.2826	21.435	16.6068	6.9123	7.37281	1.57871	188.025	155.404	155.849	104.837	105.326	199.444	13.4844	3.87294	2.08539	0.285602	1.79979	AP4E1	-	-
chr15:77681252-77681372:mpeak_68007|chr15_77407661_77712446_PEAK1_NM_-|	35.709	4.62127	1.33943	-3.45017	0.000560236	0.0398031	12.3295	9.37781	8.30341	0	1.05326	0	83.2243	66.9843	73.4532	49.5382	70.5683	53.6763	13.4179	1.81823	4.83255	0.364034	4.46851	PEAK1	-	-
chr12:99009779-99009890:mpeak_47036|chr12_99008118_99038829_IKBIP_NM_-|	105.862	1.83696	0.839928	-2.18705	0.028739	0.175746	38.5297	58.9462	25.5489	3.45615	5.26629	0.526238	306.697	333.582	280.4	85.2518	67.4086	64.7273	13.3624	4.25447	3.73356	2.08243	1.65113	IKBIP	-	-
chr2:70164469-70164529:mpeak_102581|chr2_70142172_70165228_MXD1_NM_+|	62.1251	3.01928	1.21679	-2.48135	0.0130886	0.124146	29.2826	6.69843	5.74851	1.15205	4.21303	1.05248	75.5183	71.0034	167.346	101.38	57.9292	224.177	13.2953	1.67348	2.70097	-0.289023	2.99	MXD1	-	-
chr6:143219179-143219231:mpeak_167851|chr6_143075068_143266338_HIVEP2_NM_-|	48.5801	3.58478	1.6721	-2.14388	0.0320428	0.186083	13.8707	12.0572	0	2.3041	0	0	94.0126	54.9272	144.352	71.4271	52.6629	137.348	13.2605	2.64395	3.49223	0.165864	3.32636	HIVEP2	-	-
chr1:11138709-11138794:mpeak_972|chr1_11126805_11159967_EXOSC10_NM_-|	73.6974	2.12542	0.863702	-2.46083	0.0138617	0.127587	10.7883	24.1144	10.2196	6.9123	6.31955	2.10495	83.2243	103.156	155.849	153.223	114.805	213.653	13.1848	3.18402	1.55684	-0.493116	2.04996	EXOSC10	-	-
chr16:22361073-22361178:mpeak_72379|chr16_22359144_22385938_CDR2_NM_-|	36.2004	2.70783	1.30758	-2.07087	0.0383706	0.20515	16.9531	4.01906	6.38724	4.6082	0	0	64.73	32.1525	111.777	67.971	49.5032	76.3045	13.112	7.13423	2.56976	0.106738	2.46302	CDR2	-	-
chr9:38003251-38003303:mpeak_190841|chr9_37920001_38069210_SHB_NM_-|	38.8016	2.92815	1.18179	-2.47773	0.0132222	0.124678	3.08238	13.3969	5.74851	0	5.26629	0	46.2357	61.6256	61.9562	114.053	89.527	64.7273	13.0892	5.88835	2.0775	-0.659901	2.7374	SHB	-	-
chr14:90337976-90338110:mpeak_61484|chr14_90263668_90421121_EFCAB11_NM_-|	30.3315	2.90857	1.33644	-2.17636	0.0295283	0.178314	1.54119	9.37781	6.38724	1.15205	3.15978	0	38.5297	29.4731	65.1498	33.4095	46.3434	129.455	12.9973	3.09154	2.00492	-0.651853	2.65677	EFCAB11	-	-
chr10:75909448-75909563:mpeak_25057|chr10_75883668_75910826_AP3M1_NM_-|	26.6877	3.64799	1.58234	-2.30544	0.0211422	0.151178	7.70595	1.33969	8.30341	0	2.10652	0	21.5767	32.1525	79.8404	28.8013	33.7043	104.721	12.9888	3.77903	3.04192	-0.324216	3.36614	AP3M1	-	-
chr1:40858930-40859143:mpeak_3808|chr1_40839377_40887647_SMAP2_NM_+|	24.1716	4.52147	1.54065	-2.93479	0.00333775	0.0720317	0	6.69843	7.02596	0	0	0	43.1533	44.2097	71.537	31.1054	34.7575	51.5713	12.9557	#DIV/0!	Inf	0.436266	Inf	SMAP2	-	-
chr8:42302155-42302225:mpeak_181729|chr8_42275485_42397356_SLC20A2_NM_-|	18.8275	3.83118	1.51565	-2.52775	0.0114797	NA	6.16476	1.33969	7.02596	1.15205	0	0	36.9886	25.454	49.8204	25.3451	25.2782	47.3614	12.9432	3.52724	3.6568	0.196254	3.46054	SLC20A2	-	-
chr12:93251077-93251125:mpeak_46603|chr12_93169909_93323107_EEA1_NM_-|	27.0042	2.22647	1.12069	-1.9867	0.0469557	0.228599	3.08238	10.7175	3.19362	2.3041	3.15978	0	49.3181	37.5112	44.7107	55.2984	46.3434	68.4109	12.9189	4.81957	1.63699	-0.370481	2.00747	EEA1	-	-
chr12:112815151-112815245:mpeak_48499|chr12_112600327_112819896_HECTD4_NM_-|	36.5743	2.14445	1.05533	-2.03201	0.0421526	0.215531	4.62357	9.37781	7.02596	2.3041	5.26629	0.526238	36.9886	57.6065	68.3434	48.3861	69.5151	128.928	12.9051	3.28025	1.37687	-0.599187	1.97606	HECTD4	-	-
chr11:34324873-34324945:mpeak_31788|chr11_34174131_34379555_ABTB2_NM_-|	40.326	2.64119	1.26143	-2.0938	0.0362775	0.199108	18.4943	12.0572	3.19362	1.15205	3.15978	0	60.1064	89.759	111.777	42.6259	40.0238	101.564	12.8974	3.511	2.96831	0.506214	2.46209	ABTB2	-	-
chr18:24108588-24108715:mpeak_89027|chr18_24035865_24237365_KCTD1_NM_-|	29.5501	5.64652	1.70018	-3.32113	0.000896545	0.0464114	6.16476	6.69843	6.38724	0	0	0	24.659	20.0953	104.751	31.1054	34.7575	119.982	12.8761	#DIV/0!	Inf	-0.313908	Inf	KCTD1	-	-
chr5:66228256-66228416:mpeak_150879|chr5_65892175_66458974_MAST4_NM_+|	55.5708	2.65294	1.12997	-2.3478	0.0188849	0.144213	7.70595	12.0572	5.74851	1.15205	8.42607	0	36.9886	76.3621	84.9502	142.854	163.255	127.35	12.8651	3.31454	1.41334	-1.1282	2.54155	MAST4	-	-
chr2:73241403-73241525:mpeak_102905|chr2_73172228_73298965_SFXN5_NM_-|	21.5348	4.07773	1.488	-2.74041	0.00613622	0.0909762	3.08238	6.69843	5.74851	1.15205	0	0	43.1533	29.4731	49.1817	35.7136	22.1184	62.0961	12.749	2.88185	3.75272	0.0224408	3.73028	SFXN5	-	-
chr3:25678694-25678796:mpeak_125983|chr3_25639968_25705863_TOP2B_NM_-|	198.513	1.75058	0.869402	-2.01354	0.0440578	0.221209	52.4005	28.1334	26.1877	24.1931	17.9054	10.5248	197.272	170.14	471.378	283.404	334.936	765.676	12.7233	3.80221	1.02008	-0.722479	1.74256	TOP2B	-	-
chr7:151960104-151960220:mpeak_179241|chr7_151834009_152133090_KMT2C_NM_-|	37.2995	5.25325	1.43533	-3.65997	0.000252246	0.030913	9.24714	2.67937	6.38724	0	1.05326	0	30.8238	44.2097	69.6209	71.4271	96.8998	115.246	12.6604	1.11427	4.12	-0.971111	5.09111	KMT2C	-	-
chr20:20019039-20019108:mpeak_115035|chr20_20017006_20036690_CRNKL1_NM_-|	83.1018	1.93171	0.824647	-2.34247	0.0191565	0.1451	24.659	14.7366	17.2455	11.5205	3.15978	2.10495	141.789	107.175	201.837	168.199	139.03	165.765	12.5646	3.54872	1.75466	-0.0693327	1.82399	CRNKL1	-	-
chr15:50589029-50589171:mpeak_64958|chr15_50570981_50647605_GABPB1_NM_-|	28.8127	4.62621	1.5784	-2.93095	0.00337927	0.0724159	4.62357	9.37781	3.19362	1.15205	0	0	46.2357	18.7556	72.1758	57.6025	31.5978	101.038	12.5358	1.81675	3.89971	-0.471871	4.37158	GABPB1	-	-
chr1:114441337-114441395:mpeak_9140|chr1_114438114_114447746_AP4B1_NM_-|	52.1258	2.45854	0.943552	-2.60562	0.00917076	0.107777	12.3295	2.67937	10.2196	2.3041	1.05326	4.73614	64.73	44.2097	92.6149	153.223	103.219	134.191	12.5169	2.0719	1.64022	-0.954643	2.59486	AP4B1	-	-
chr15:86045073-86045131:mpeak_68866|chr15_85923846_86287858_AKAP13_NM_+|	36.7443	2.90858	1.23264	-2.35964	0.0182929	0.142429	10.7883	5.35875	2.55489	0	3.15978	1.05248	43.1533	44.2097	63.8724	54.1464	47.3966	165.239	12.3661	2.36837	2.15053	-0.818865	2.96939	AKAP13	-	-
chr6:155129280-155129347:mpeak_169106|chr6_155054511_155153072_SCAF8_NM_+|	84.7764	2.51181	0.988802	-2.54026	0.011077	0.116194	26.2002	10.7175	12.1357	5.76025	7.37281	0	146.413	104.496	148.184	191.24	153.776	211.021	12.2913	3.54285	1.90115	-0.47846	2.37961	SCAF8	-	-
chr15:93493403-93493544:mpeak_69463|chr15_93443550_93567601_CHD2_NM_+|	30.1449	2.32667	1.14313	-2.03536	0.0418152	0.214746	3.08238	5.35875	7.66468	1.15205	4.21303	0.526238	47.7769	24.1144	60.04	41.4738	61.089	105.248	12.2077	2.83495	1.45092	-0.655482	2.1064	CHD2	-	-
chr16:69403632-69403740:mpeak_75085|chr16_69390959_69419891_TERF2_NM_-|	91.1855	1.98462	0.874233	-2.27013	0.0231996	0.158137	20.0355	9.37781	10.2196	8.06436	8.42607	5.26238	84.7654	65.6446	174.372	202.761	147.456	357.842	12.2029	3.07217	0.865495	-1.1244	1.98989	TERF2	-	-
chr17:60141735-60141834:mpeak_84992|chr17_60023961_60142643_MED13_NM_-|	386.214	1.46656	0.596201	-2.45984	0.0139	0.127653	141.789	87.0796	67.7047	21.889	26.3315	29.9956	699.7	730.129	1016.85	546.072	502.404	764.624	12.1215	4.31394	1.92286	0.432365	1.49049	MED13	-	-
chr5:66274405-66274588:mpeak_150884|chr5_65892175_66458974_MAST4_NM_+|	55.4658	2.48904	1.24004	-2.00724	0.0447246	0.222597	4.62357	17.4159	1.91617	4.6082	5.26629	0	36.9886	76.3621	84.9502	142.854	163.255	127.35	12.0805	3.4171	1.27859	-1.1282	2.40679	MAST4	-	-
chr5:66234644-66235032:mpeak_150880|chr5_65892175_66458974_MAST4_NM_+|	54.8694	4.0861	1.15206	-3.54679	0.00038995	0.0356289	1.54119	14.7366	7.66468	1.15205	0	1.57871	36.9886	76.3621	84.9502	142.854	163.255	127.35	12.0738	0.944991	3.13219	-1.1282	4.2604	MAST4	-	-
chr21:43425298-43425396:mpeak_120563|chr21_43414217_43430496_ZBTB21_NM_-|	25.7072	5.41575	1.6175	-3.34822	0.00081333	0.0451974	7.70595	1.33969	6.38724	0	0	0	43.1533	36.1715	48.543	35.7136	24.2249	105.248	12.0694	#DIV/0!	Inf	-0.369439	Inf	ZBTB21	-	-
chr11:72461584-72461639:mpeak_34889|chr11_72396726_72463434_ARAP1_NM_-|	47.6317	5.0367	1.67339	-3.00987	0.00261358	0.066047	0	8.03812	7.02596	0	1.05326	0	26.2002	36.1715	125.19	85.2518	81.1009	201.549	12.0473	0.858864	3.83818	-0.971957	4.81014	ARAP1	-	-
chr12:12353309-12353369:mpeak_39697|chr12_12274354_12419811_LRP6_NM_-|	53.5291	2.58102	1.31626	-1.96087	0.0498942	0.236802	21.5767	1.33969	7.66468	1.15205	6.31955	0	81.6831	56.2668	118.164	76.0354	110.592	161.555	11.9404	3.21883	2.03315	-0.443059	2.47621	LRP6	-	-
chr3:143704633-143704697:mpeak_133766|chr3_143690639_143708351_C3orf58_NM_+|	62.6516	5.33762	1.47656	-3.6149	0.000300469	0.0326575	16.9531	12.0572	16.6068	1.15205	0	0	84.7654	85.7399	216.527	80.6436	54.7695	182.605	11.7864	1.08678	5.3073	0.283349	5.02395	C3orf58	-	-
chr12:57461516-57461639:mpeak_43888|chr12_57453842_57472574_NEMP1_NM_-|	49.49	3.12838	1.2732	-2.45711	0.0140062	0.128065	4.62357	14.7366	3.19362	2.3041	1.05326	1.57871	40.0709	45.5493	106.028	61.0587	61.089	252.594	11.7683	1.31719	2.19193	-0.967436	3.15937	NEMP1	-	-
chr4:41144996-41145212:mpeak_140314|chr4_40818276_41216635_APBB2_NM_-|	156.645	1.81296	0.711812	-2.54697	0.0108664	0.115109	35.4474	16.0762	24.2715	8.06436	13.6924	14.7347	184.943	154.064	306.587	300.685	328.617	492.559	11.7404	3.25276	1.05455	-0.797194	1.85174	APBB2	-	-
chr6:143090483-143090659:mpeak_167831|chr6_143075068_143266338_HIVEP2_NM_-|	49.4473	3.01608	1.21069	-2.49122	0.0127306	0.122806	12.3295	13.3969	8.30341	4.6082	0	0	94.0126	54.9272	144.352	71.4271	52.6629	137.348	11.6027	5.28791	2.88452	0.165864	2.71866	HIVEP2	-	-
chr15:58894972-58895035:mpeak_65988|chr15_58889840_59042177_ADAM10_NM_-|	39.5685	4.00464	1.37679	-2.90868	0.00362953	0.0743817	7.70595	8.03812	8.30341	0	2.10652	0	78.6007	37.5112	93.8924	57.6025	47.3966	133.664	11.4509	2.64789	3.51295	-0.18456	3.69751	ADAM10	-	-
chr17:80420268-80420409:mpeak_87431|chr17_80416059_80445791_NARF_NM_+|	52.0402	2.12032	0.969497	-2.18704	0.0287399	0.175746	9.24714	25.454	7.66468	2.3041	2.10652	1.05248	98.6362	135.308	143.074	56.4505	64.2488	78.9357	11.2371	2.73654	2.95511	0.917271	2.03784	NARF	-	-
chr5:65953652-65953714:mpeak_150839|chr5_65892175_66458974_MAST4_NM_+|	54.7662	4.08505	1.5803	-2.58498	0.00973858	0.110816	1.54119	20.0953	0.638724	0	3.15978	0	36.9886	76.3621	84.9502	142.854	163.255	127.35	11.233	2.1869	2.81754	-1.1282	3.94575	MAST4	-	-
chr10:69822893-69823036:mpeak_24270|chr10_69682896_69835103_HERC4_NM_-|	60.2749	3.6248	1.27265	-2.84823	0.00439631	0.0795471	13.8707	12.0572	3.83234	2.3041	2.10652	0	52.4005	71.0034	142.435	80.6436	86.3672	256.278	11.1948	1.56298	2.75433	-0.671088	3.42542	HERC4	-	-
chr9:135228211-135228305:mpeak_196689|chr9_135140372_135230372_SETX_NM_-|	77.0672	2.06006	0.750713	-2.74414	0.00606692	0.0906525	15.4119	8.03812	12.7745	2.3041	8.42607	4.2099	131.001	93.7781	99.0022	229.258	166.415	154.188	11.1879	2.71707	1.27778	-0.764046	2.04182	SETX	-	-
chr2:74061734-74061789:mpeak_103001|chr2_74056042_74089329_STAMBP_NM_+|	72.0072	2.58661	1.31457	-1.96765	0.0491078	0.234762	10.7883	24.1144	2.55489	2.3041	3.15978	3.15743	41.6121	44.2097	249.741	101.38	91.6335	289.431	11.1626	1.787	2.11928	-0.523782	2.64306	STAMBP	-	-
chr5:65897569-65897632:mpeak_150823|chr5_65892175_66458974_MAST4_NM_+|	54.9858	3.03252	1.18521	-2.55864	0.0105083	0.113937	3.08238	14.7366	3.83234	1.15205	5.26629	0	36.9886	76.3621	84.9502	142.854	163.255	127.35	10.9184	2.22109	1.75418	-1.1282	2.88238	MAST4	-	-
chr8:73943201-73943262:mpeak_183180|chr8_73921096_73958195_TERF1_NM_+|	34.6646	2.99049	1.12476	-2.65877	0.00784259	0.10076	9.24714	6.69843	5.10979	1.15205	2.10652	0	70.8947	52.2478	72.1758	61.0587	54.7695	80.5144	10.78	2.48945	2.69188	-0.007546	2.69942	TERF1	-	-
chr7:141062826-141062893:mpeak_178577|chr7_140774031_141170335_TMEM178B_NM_+|	53.4201	2.44236	1.07685	-2.26807	0.0233249	0.158597	0	13.3969	4.47107	1.15205	2.10652	1.57871	86.3066	71.0034	91.9762	110.597	93.74	164.713	10.7515	1.31074	1.8851	-0.566011	2.45111	TMEM178B	-	-
chr12:120158195-120158345:mpeak_49101|chr12_120126060_120315095_CIT_NM_-|	44.2728	2.65966	1.25707	-2.11576	0.0343652	0.192981	1.54119	5.35875	12.7745	5.76025	1.05326	0	43.1533	54.9272	84.9502	74.8833	88.4737	158.398	10.7492	3.17642	1.52985	-0.813875	2.34372	CIT	-	-
chr10:27149667-27149743:mpeak_21962|chr10_27037674_27150016_ABI1_NM_-|	96.3639	2.00387	0.929215	-2.15652	0.0310431	0.18282	13.8707	22.7747	13.4132	4.6082	7.37281	4.73614	104.801	89.759	271.458	132.486	145.35	345.738	10.7418	2.68086	1.58229	-0.420177	2.00246	ABI1	-	-
chr8:123819453-123819504:mpeak_186956|chr8_123793900_123985481_ZHX2_NM_+|	26.8183	3.94818	1.43213	-2.75686	0.00583599	0.0893042	6.16476	6.69843	4.47107	0	1.05326	0	46.2357	48.2287	69.6209	47.2341	28.438	63.6748	10.5642	2.26756	4.04069	0.235765	3.80493	ZHX2	-	-
chr11:111916625-111916699:mpeak_37235|chr11_111895537_111933129_DLAT_NM_+|	62.9968	2.51079	1.21169	-2.07213	0.0382529	0.204688	10.7883	10.7175	14.6906	5.76025	2.10652	0	72.4359	50.9081	219.721	108.293	70.5683	189.972	10.5509	3.19932	2.20201	-0.104486	2.30649	DLAT	-	-
chr5:66261469-66261526:mpeak_150883|chr5_65892175_66458974_MAST4_NM_+|	54.9921	2.68749	1.16347	-2.3099	0.0208938	0.150296	4.62357	13.3969	2.55489	2.3041	5.26629	0	36.9886	76.3621	84.9502	142.854	163.255	127.35	10.3758	2.61976	1.44248	-1.1282	2.57068	MAST4	-	-
chr10:105764302-105764374:mpeak_27720|chr10_105726942_105785331_SLK_NM_+|	50.0077	2.85992	1.00645	-2.84158	0.00448905	0.0802191	1.54119	9.37781	5.74851	3.45615	2.10652	1.05248	43.1533	41.5303	76.6468	111.749	122.178	181.552	10.3313	1.59217	1.33319	-1.36476	2.69795	SLK	-	-
chr4:1740624-1740740:mpeak_138069|chr4_1723216_1746674_TACC3_NM_+|	506.175	1.7979	0.765256	-2.34941	0.018803	0.143881	53.9416	93.7781	72.1758	35.7136	49.5032	22.6282	491.64	547.932	1096.05	1043.76	689.884	1877.09	10.2966	2.98679	1.02786	-0.757636	1.7855	TACC3	-	-
chr1:214805860-214805951:mpeak_17664|chr1_214776531_214836933_CENPF_NM_+|	54.5669	1.7574	0.865809	-2.02978	0.0423786	0.216303	3.08238	6.69843	3.19362	3.45615	9.47933	2.63119	44.6945	44.2097	37.6847	160.135	153.776	185.762	10.2493	3.11537	-0.262789	-1.98083	1.71804	CENPF	-	-
chr6:24238707-24238757:mpeak_160296|chr6_24175062_24383520_DCDC2_NM_-|	35.082	2.37225	1.17449	-2.01981	0.0434031	0.219372	10.7883	5.35875	2.55489	1.15205	1.05326	1.57871	64.73	29.4731	88.7826	57.6025	51.6097	106.3	10.2205	1.75583	2.3052	-0.23604	2.54124	DCDC2	-	-
chr5:66165451-66165509:mpeak_150871|chr5_65892175_66458974_MAST4_NM_+|	54.7004	3.49791	1.36897	-2.55514	0.0106145	0.114305	1.54119	17.4159	1.27745	2.3041	2.10652	0	36.9886	76.3621	84.9502	142.854	163.255	127.35	10.204	1.52631	2.19777	-1.1282	3.32597	MAST4	-	-
chr6:5499610-5499663:mpeak_159257|chr6_5261583_5771523_FARS2_NM_+|	52.2445	5.29702	1.67646	-3.15965	0.00157959	0.0566988	7.70595	13.3969	0	0	0	0	103.26	71.0034	137.326	103.685	81.1009	109.458	10.159	#DIV/0!	Inf	0.0826347	Inf	FARS2	-	-
chr15:42820575-42820629:mpeak_64303|chr15_42787503_42823610_SNAP23_NM_+|	36.4931	3.27238	1.49296	-2.19187	0.0283887	0.174878	4.62357	2.67937	9.58085	0	3.15978	0	35.4474	28.1334	103.473	46.082	42.1303	162.608	10.1068	3.77934	2.41775	-0.586337	3.00408	SNAP23	-	-
chr11:12805954-12806023:mpeak_30614|chr11_12695968_12958655_TEAD1_NM_+|	65.9978	2.3072	1.10721	-2.0838	0.037178	0.201626	7.70595	13.3969	5.74851	2.3041	8.42607	0	70.8947	91.0987	104.751	137.094	107.432	243.122	10.0663	3.30059	1.32332	-0.870385	2.19371	TEAD1	-	-
chr10:52278367-52278417:mpeak_23558|chr10_52067081_52383737_SGMS1_NM_-|	42.1923	2.64002	1.20121	-2.19779	0.0279638	0.173525	4.62357	8.03812	7.02596	2.3041	3.15978	0	78.6007	33.4922	84.3115	61.0587	55.8227	167.87	10.024	2.87824	1.84929	-0.535876	2.38517	SGMS1	-	-
chr10:52098047-52098115:mpeak_23531|chr10_52067081_52383737_SGMS1_NM_-|	42.0922	2.89036	1.292	-2.23713	0.0252781	0.164632	7.70595	9.37781	2.55489	1.15205	3.15978	0	78.6007	33.4922	84.3115	61.0587	55.8227	167.87	9.99909	2.27136	2.18732	-0.535876	2.7232	SGMS1	-	-
chr17:1922629-1922690:mpeak_77712|chr17_1841102_1928639_RTN4RL1_NM_-|	59.8372	2.77444	1.28175	-2.16458	0.0304202	0.181164	0	16.0762	4.47107	3.45615	1.05326	0	104.801	117.892	85.589	163.591	129.551	91.5654	9.99764	1.75825	2.18794	-0.31951	2.50745	RTN4RL1	-	-
chr7:141030716-141030841:mpeak_178568|chr7_140774031_141170335_TMEM178B_NM_+|	53.0421	3.44178	1.34279	-2.56315	0.0103726	0.113543	0	13.3969	3.19362	0	0	1.57871	86.3066	71.0034	91.9762	110.597	93.74	164.713	9.98279	1.28334	3.39353	-0.566011	3.95954	TMEM178B	-	-
chr3:195018591-195018668:mpeak_137266|chr3_195000157_195163817_ACAP2_NM_-|	44.0425	2.91664	1.25883	-2.31694	0.0205068	0.149533	3.08238	16.0762	1.91617	2.3041	2.10652	0	58.5652	62.9653	90.06	95.6202	71.6216	124.192	9.96018	2.27013	2.25647	-0.461894	2.71836	ACAP2	-	-
chr4:184051465-184051586:mpeak_147429|chr4_184020462_184236815_WWC2_NM_+|	54.6913	2.80146	1.20024	-2.33408	0.0195915	0.146655	3.08238	14.7366	3.83234	3.45615	3.15978	0	43.1533	68.324	106.028	109.445	94.7933	206.285	9.95436	2.41738	1.71044	-0.916413	2.62685	WWC2	-	-
chr17:30911442-30911590:mpeak_80894|chr17_30821933_31204191_MYO1D_NM_-|	111.065	2.15969	1.1012	-1.96122	0.0498539	0.236716	15.4119	26.7937	7.66468	8.06436	8.42607	1.05248	87.8478	136.648	279.122	197.001	134.817	429.936	9.90241	2.30296	1.50729	-0.596996	2.10429	MYO1D	-	-
chr1:14138868-14138936:mpeak_1129|chr1_14026734_14149653_PRDM2_NM_+|	38.2223	3.87735	1.48637	-2.60861	0.00909114	0.107338	10.7883	18.7556	5.10979	0	0	0	97.095	174.159	79.8404	27.6492	17.9054	27.3644	9.8702	#DIV/0!	Inf	2.26749	Inf	PRDM2	-	-
chr17:27861175-27861326:mpeak_80414|chr17_27717942_27869578_TAOK1_NM_+|	291.827	1.2428	0.609703	-2.03838	0.0415123	0.213968	53.9416	48.2287	34.4911	40.3218	21.0652	17.8921	536.334	458.173	397.925	642.844	492.925	757.783	9.81459	4.18679	0.785595	-0.443489	1.22908	TAOK1	-	-
chr7:72300314-72300372:mpeak_173690|chr7_72299951_72307155_SBDSP1_NR_+|	52.6514	3.20542	1.29951	-2.46664	0.0136386	0.126339	16.9531	1.33969	10.2196	2.3041	0	1.05248	94.0126	46.889	150.1	85.2518	57.9292	165.765	9.798	1.62969	3.08652	-0.0863272	3.17285	SBDSP1	-	-
chr10:52156028-52156083:mpeak_23542|chr10_52067081_52383737_SGMS1_NM_-|	41.7854	4.8783	1.53935	-3.16905	0.00152937	0.0562301	10.7883	2.67937	5.74851	0	1.05326	0	78.6007	33.4922	84.3115	61.0587	55.8227	167.87	9.78401	1.10966	4.18939	-0.535876	4.72527	SGMS1	-	-
chr5:171583747-171583854:mpeak_157861|chr5_171472026_171615346_STK10_NM_-|	24.0148	4.09728	1.4688	-2.78954	0.00527833	0.0858724	3.08238	1.33969	7.66468	0	1.05326	0	36.9886	36.1715	53.0141	41.4738	50.5564	56.8337	9.57942	2.12259	3.52049	-0.238578	3.75907	STK10	-	-
chr10:21250548-21250654:mpeak_21502|chr10_21074852_21463116_NEBL_NM_-|	158.129	1.55024	0.743755	-2.08435	0.0371288	0.201463	47.7769	22.7747	15.3294	6.9123	11.5858	9.47228	288.203	229.086	381.318	259.211	246.463	379.418	9.55712	3.16017	1.61844	0.0218634	1.59657	NEBL	-	-
chr2:191118702-191118857:mpeak_110199|chr2_191069958_191184771_HIBCH_NM_-|	55.7996	3.04101	1.06227	-2.86273	0.00420004	0.0783697	9.24714	13.3969	8.30341	2.3041	2.10652	0	81.6831	81.7209	161.597	94.4682	85.314	129.455	9.52225	2.13944	2.81077	0.0717328	2.73903	HIBCH	-	-
chr4:48552522-48552671:mpeak_140588|chr4_48501697_48782316_FRYL_NM_-|	79.7595	2.29388	0.857245	-2.67588	0.00745338	0.0987639	12.3295	14.7366	10.2196	8.06436	2.10652	1.05248	117.13	137.988	137.326	144.006	140.083	232.071	9.50089	2.17439	1.73212	-0.395335	2.12745	FRYL	-	-
chr5:60736802-60736924:mpeak_150482|chr5_60628099_60839281_ZSWIM6_NM_+|	68.0255	2.39035	1.07836	-2.21665	0.0266472	0.169028	21.5767	20.0953	5.74851	1.15205	1.05326	2.10495	157.201	116.553	225.469	67.971	55.8227	141.558	9.49885	1.62436	3.45966	0.91178	2.54788	ZSWIM6	-	-
chr6:143213046-143213153:mpeak_167848|chr6_143075068_143266338_HIVEP2_NM_-|	48.7974	3.1366	1.28843	-2.43444	0.0149147	0.131455	12.3295	12.0572	3.19362	1.15205	2.10652	0	94.0126	54.9272	144.352	71.4271	52.6629	137.348	9.40373	1.8696	3.08133	0.165864	2.91546	HIVEP2	-	-
chr6:143217370-143217503:mpeak_167849|chr6_143075068_143266338_HIVEP2_NM_-|	48.8823	2.66554	1.29155	-2.06382	0.0390348	0.207316	16.9531	8.03812	2.55489	1.15205	3.15978	0	94.0126	54.9272	144.352	71.4271	52.6629	137.348	9.39206	2.47391	2.67548	0.165864	2.50961	HIVEP2	-	-
chr13:99171492-99171740:mpeak_54866|chr13_99105463_99229405_STK24_NM_-|	131.601	1.92913	0.785744	-2.45516	0.0140821	0.128315	26.2002	20.0953	21.0779	10.3685	6.31955	3.15743	223.473	202.293	298.923	206.217	165.362	395.731	9.29689	2.58637	1.76337	-0.0824493	1.84582	STK24	-	-
chr9:97990573-97990757:mpeak_192986|chr9_97864132_98079991_FANCC_NM_-|	48.5291	2.34889	1.03806	-2.26276	0.0236504	0.159667	7.70595	9.37781	5.74851	1.15205	5.26629	0	92.4714	65.6446	88.7826	89.86	75.8346	140.506	9.24763	3.14419	1.8308	-0.310556	2.14136	FANCC	-	-
chr5:65960610-65960715:mpeak_150841|chr5_65892175_66458974_MAST4_NM_+|	54.6959	2.81101	1.20603	-2.3308	0.019764	0.147035	3.08238	10.7175	4.47107	0	6.31955	0	36.9886	76.3621	84.9502	142.854	163.255	127.35	9.21374	4.37381	1.53166	-1.1282	2.65986	MAST4	-	-
chr10:43289381-43289451:mpeak_23047|chr10_43277953_43326313_BMS1_NM_+|	248.819	1.68651	0.821793	-2.05223	0.0401469	0.21071	38.5297	16.0762	38.3234	19.5849	20.0119	13.156	226.555	230.426	556.967	497.686	382.333	946.176	9.16511	2.88867	0.816889	-0.848857	1.66575	BMS1	-	-
chr15:50741615-50741690:mpeak_65022|chr15_50716573_50791099_USP8_NM_+|	71.3118	4.41349	1.54227	-2.86168	0.00421405	0.0783697	9.24714	0	7.66468	1.15205	0	0.526238	49.3181	76.3621	152.016	109.445	103.219	346.791	9.13506	0.44998	3.33297	-1.01051	4.34348	USP8	-	-
chr11:66261057-66261108:mpeak_33961|chr11_66247483_66276549_DPP3_NM_+|	120.581	1.94088	0.941941	-2.06051	0.0393501	0.208337	33.9062	17.4159	15.3294	5.76025	4.21303	4.73614	137.166	170.14	427.945	162.439	123.231	344.686	9.06513	2.33351	2.1799	0.222069	1.95783	DPP3	-	-
chr2:236877144-236877270:mpeak_113307|chr2_236402732_237032562_AGAP1_NM_+|	74.8133	2.56812	1.05396	-2.43663	0.0148248	0.130875	13.8707	8.03812	9.58085	4.6082	4.21303	0	107.883	61.6256	179.481	146.31	129.551	232.597	9.02308	2.60235	1.83583	-0.542943	2.37877	AGAP1	-	-
chr10:74182846-74182898:mpeak_24720|chr10_74128113_74385949_MICU1_NM_-|	39.1571	4.08877	1.7519	-2.3339	0.019601	0.146655	0	2.67937	10.2196	0	1.05326	0	47.7769	32.1525	135.409	49.5382	43.1836	147.873	8.98511	1.31332	3.61432	-0.159997	3.77432	MICU1	-	-
chr7:26778408-26778468:mpeak_171583|chr7_26709275_26904362_SKAP2_NM_-|	41.3738	4.50494	1.61137	-2.79572	0.00517843	0.0853468	12.3295	5.35875	2.55489	0	1.05326	0	43.1533	65.6446	116.886	36.8656	52.6629	159.976	8.96968	1.26642	4.2645	-0.144762	4.40926	SKAP2	-	-
chr19:17257411-17257518:mpeak_92933|chr19_17186590_17322703_MYO9B_NM_+|	24.4827	4.40412	1.46817	-2.99974	0.00270209	0.0667883	7.70595	1.33969	5.74851	0	0	0	52.4005	45.5493	68.3434	31.1054	44.2369	37.3629	8.89642	#DIV/0!	Inf	0.561176	Inf	MYO9B	-	-
chr1:93218172-93218325:mpeak_6904|chr1_92979527_93257961_EVI5_NM_-|	40.7903	2.58343	1.1242	-2.29801	0.0215609	0.152517	4.62357	14.7366	5.74851	2.3041	1.05326	0	95.5538	101.816	85.589	56.4505	63.1955	58.4124	8.8736	2.82831	2.90278	0.668242	2.23454	EVI5	-	-
chr14:64403610-64403679:mpeak_59083|chr14_64319682_64692036_SYNE2_NM_+|	70.0454	3.85722	1.59481	-2.4186	0.0155802	0.133677	6.16476	14.7366	0	0	2.10652	0	126.378	136.648	92.6149	185.48	190.64	85.7768	8.81563	1.36817	3.31066	-0.377151	3.68781	SYNE2	-	-
chr22:34095922-34096003:mpeak_122751|chr22_33670610_34316416_LARGE_NM_-|	42.6069	5.44187	1.47283	-3.69485	0.000220016	0.0297915	7.70595	10.7175	2.55489	0	0	0	73.9771	52.2478	111.777	93.3161	85.314	73.6733	8.81437	#DIV/0!	Inf	-0.0841888	Inf	LARGE	-	-
chr19:40929814-40929865:mpeak_94893|chr19_40929453_40931932_SERTAD1_NM_-|	48.0649	4.94862	1.46775	-3.37156	0.000747448	0.0428965	1.54119	13.3969	5.10979	0	1.05326	0	67.8124	80.3812	79.8404	94.4682	69.5151	163.66	8.7916	0.964395	4.25052	-0.522877	4.77339	SERTAD1	-	-
chr12:26493090-26493242:mpeak_40521|chr12_26492416_26986131_ITPR2_NM_-|	35.9616	2.56423	1.18901	-2.15662	0.0310356	0.18282	3.08238	12.0572	5.10979	0	3.15978	0	83.2243	66.9843	80.4792	73.7313	56.876	46.8352	8.77782	5.3422	2.67998	0.378591	2.30139	ITPR2	-	-
chr4:184151782-184151912:mpeak_147441|chr4_184020462_184236815_WWC2_NM_+|	54.5481	2.31307	1.04485	-2.21378	0.0268439	0.169643	9.24714	5.35875	4.47107	1.15205	5.26629	1.05248	43.1533	68.324	106.028	109.445	94.7933	206.285	8.77079	1.81983	1.35249	-0.916413	2.26891	WWC2	-	-
chr2:122341097-122341351:mpeak_105861|chr2_122098523_122407052_CLASP1_NM_-|	75.4171	2.92118	1.10239	-2.64987	0.00805236	0.101812	9.24714	12.0572	8.30341	1.15205	4.21303	1.05248	69.3535	69.6637	200.559	102.533	124.285	302.587	8.71902	1.21222	2.20588	-0.640632	2.84651	CLASP1	-	-
chr17:12041821-12041969:mpeak_78978|chr17_11924134_12044463_MAP2K4_NM_+|	108.117	2.47659	1.10468	-2.24191	0.0249672	0.163614	12.3295	29.4731	8.94213	4.6082	6.31955	0	194.19	176.839	219.082	180.872	114.805	349.948	8.59919	2.53888	2.21526	-0.129712	2.34497	MAP2K4	-	-
chr10:64028301-64028356:mpeak_24011|chr10_63958202_64028622_RTKN2_NM_-|	111.32	1.95865	0.865325	-2.26349	0.0236056	0.159494	24.659	21.435	10.2196	2.3041	9.47933	2.10495	238.884	273.296	143.074	198.153	246.463	165.765	8.59416	2.27537	2.0196	0.102347	1.91726	RTKN2	-	-
chr10:94376586-94376637:mpeak_26344|chr10_94352824_94413421_KIF11_NM_+|	74.3389	4.23446	1.66066	-2.54986	0.0107765	0.114682	0	0	10.2196	0	1.05326	0	138.707	81.7209	140.519	216.586	199.066	104.195	8.49397	0.607829	3.2784	-0.526298	3.8047	KIF11	-	-
chr8:62460625-62460687:mpeak_182592|chr8_62416068_62627199_ASPH_NM_-|	44.4125	3.55828	1.48109	-2.40248	0.0162844	0.136005	12.3295	1.33969	8.30341	1.15205	1.05326	0	64.73	46.889	150.1	44.93	64.2488	137.874	8.3955	1.33897	3.31665	0.0831976	3.23346	ASPH	-	-
chr5:72866123-72866178:mpeak_151577|chr5_72861565_72875701_UTP15_NM_+|	48.2081	2.52797	1.23765	-2.04256	0.0410959	0.212802	0	9.37781	5.74851	0	0	2.10495	103.26	66.9843	100.28	105.989	60.0357	124.718	8.38724	2.17197	2.8452	-0.103989	2.94919	UTP15	-	-
chr4:48636080-48636186:mpeak_140608|chr4_48501697_48782316_FRYL_NM_-|	78.9039	3.20416	1.06157	-3.01832	0.00254183	0.06532	12.3295	16.0762	4.47107	1.15205	4.21303	0	117.13	137.988	137.326	144.006	140.083	232.071	8.37746	1.55913	2.6154	-0.395335	3.01073	FRYL	-	-
chr4:39309842-39309984:mpeak_139869|chr4_39290464_39368001_RFC1_NM_-|	73.6891	2.50588	1.22998	-2.03733	0.0416166	0.214111	7.70595	14.7366	1.27745	5.76025	3.15978	0	77.0595	79.0415	127.745	175.112	131.657	261.014	8.35663	2.35654	1.41098	-1.00023	2.41121	RFC1	-	-
chr12:65222214-65222270:mpeak_44603|chr12_65218351_65268780_TBC1D30_NM_+|	82.4839	1.82853	0.906756	-2.01656	0.0437414	0.220178	12.3295	8.03812	4.47107	9.21641	4.21303	2.10495	135.625	56.2668	107.306	197.001	194.853	258.383	8.30179	2.38904	0.677124	-1.11987	1.79699	TBC1D30	-	-
chr10:1123848-1123951:mpeak_19974|chr10_1102775_1175152_WDR37_NM_+|	44.7053	3.02365	1.25847	-2.40263	0.0162777	0.135985	13.8707	2.67937	2.55489	2.3041	1.05326	0	67.8124	68.324	94.5311	74.8833	81.1009	127.35	8.28248	1.77742	2.50855	-0.296688	2.80524	WDR37	-	-
chr20:33916159-33916221:mpeak_115776|chr20_33891872_33999945_UQCC1_NM_-|	49.6763	2.72457	1.12287	-2.42644	0.0152478	0.132583	7.70595	14.7366	6.38724	0	3.15978	0	117.13	135.308	99.6409	78.3395	56.876	76.8308	8.18841	4.47041	3.18966	0.731523	2.45814	UQCC1	-	-
chr1:76227931-76228044:mpeak_6067|chr1_76190031_76228376_ACADM_NM_+|	57.6009	3.16443	1.14857	-2.75511	0.00586719	0.0894902	12.3295	9.37781	8.30341	1.15205	2.10652	0	121.754	81.7209	164.791	69.123	78.9944	141.558	8.14921	1.68735	3.20317	0.346309	2.85686	ACADM	-	-
chr11:46797798-46797927:mpeak_32349|chr11_46765815_46867859_CKAP5_NM_-|	109.081	2.38715	1.05075	-2.27186	0.0230951	0.157832	30.8238	9.37781	9.58085	1.15205	1.05326	6.31486	166.449	158.083	287.426	155.527	139.03	344.16	8.13496	1.33395	2.54668	-0.0617455	2.60843	CKAP5	-	-
chr7:100411527-100411586:mpeak_175730|chr7_100401212_100425143_EPHB4_NM_-|	168.861	2.03546	0.902141	-2.25625	0.0240547	0.160992	32.365	24.1144	13.4132	8.06436	10.5326	3.15743	152.578	215.69	492.456	355.984	249.622	468.352	8.12021	2.02563	1.68383	-0.319316	2.00315	EPHB4	-	-
chr13:60390612-60390712:mpeak_53901|chr13_60240980_60738119_DIAPH3_NM_-|	34.0845	3.74276	1.39125	-2.69021	0.00714078	0.0969839	6.16476	5.35875	7.66468	1.15205	0	0	72.4359	104.496	61.3175	47.2341	64.2488	38.9416	8.05384	2.2976	4.05794	0.66343	3.39451	DIAPH3	-	-
chr6:158403074-158403126:mpeak_169304|chr6_158402887_158516649_SYNJ2_NM_+|	107.864	1.78216	0.899664	-1.98092	0.0476005	0.230324	29.2826	10.7175	3.83234	4.6082	5.26629	5.26238	135.625	211.67	197.366	226.954	224.344	239.438	8.04766	2.19141	1.53393	-0.342777	1.87671	SYNJ2	-	-
chr9:133684719-133684853:mpeak_196495|chr9_133589267_133759355_ABL1_NM_+|	118.944	2.947	1.39949	-2.10576	0.0352252	0.195785	0	18.7556	1.27745	3.45615	2.10652	1.57871	60.1064	83.0606	231.218	261.516	201.172	563.075	8.02639	0.696202	1.48811	-1.4541	2.94221	ABL1	-	-
chr15:40684142-40684233:mpeak_63976|chr15_40674921_40685393_KNSTRN_NM_+|	101.811	2.66211	1.16054	-2.29386	0.0217985	0.15326	6.16476	0	11.497	2.3041	4.21303	1.57871	132.542	60.2859	140.519	213.129	164.308	485.191	7.94747	0.938509	1.12538	-1.37171	2.49709	KNSTRN	-	-
chr2:24845831-24845937:mpeak_98740|chr2_24807345_24991089_NCOA1_NM_+|	41.4078	3.38907	1.4005	-2.41991	0.0155245	0.13331	3.08238	12.0572	3.83234	0	2.10652	0	60.1064	57.6065	123.274	67.971	54.7695	112.089	7.8726	2.69113	3.17093	0.0373413	3.13359	NCOA1	-	-
chr17:2584393-2584617:mpeak_77852|chr17_2496922_2585022_PAFAH1B1_NM_+|	276.903	1.88969	0.681479	-2.77293	0.00555545	0.0875004	49.3181	22.7747	30.6587	11.5205	7.37281	18.9446	513.216	463.532	335.969	626.716	485.552	757.257	7.82739	2.02393	1.44126	-0.510116	1.95137	PAFAH1B1	-	-
chr14:90500541-90500592:mpeak_61514|chr14_90422245_90509413_TDP1_NM_+|	51.3564	2.88869	1.02249	-2.82514	0.00472596	0.0821902	3.08238	6.69843	5.74851	1.15205	3.15978	0.526238	46.2357	60.2859	92.6149	126.726	117.965	152.083	7.79833	1.21935	1.68249	-0.994557	2.67705	TDP1	-	-
chr9:20687888-20688090:mpeak_189890|chr9_20658307_20995554_FOCAD_NM_+|	57.4031	2.25593	1.10393	-2.04355	0.040998	0.212676	12.3295	4.01906	9.58085	1.15205	4.21303	0.526238	97.095	68.324	167.346	97.9243	61.089	165.239	7.79213	1.8169	2.13793	0.037386	2.10054	FOCAD	-	-
chr12:77257580-77257632:mpeak_45727|chr12_77252808_77272820_CSRP2_NM_-|	45.1344	4.2647	1.71414	-2.48795	0.0128483	0.123416	20.0355	9.37781	0.638724	0	0	0	73.9771	103.156	210.779	29.9533	33.7043	59.9911	7.74712	#DIV/0!	Inf	1.64948	Inf	CSRP2	-	-
chr2:42528421-42528553:mpeak_100428|chr2_42396477_42556873_EML4_NM_+|	93.329	2.73605	1.05572	-2.59165	0.00955161	0.109774	16.9531	6.69843	8.94213	3.45615	2.10652	2.10495	80.1419	65.6446	275.929	183.176	172.734	302.061	7.72883	1.16534	2.08774	-0.641756	2.7295	EML4	-	-
chr11:12879601-12879656:mpeak_30620|chr11_12695968_12958655_TEAD1_NM_+|	64.1057	4.8716	1.47127	-3.31115	0.000929138	0.0470496	0	6.69843	7.02596	1.15205	0	0	70.8947	91.0987	104.751	137.094	107.432	243.122	7.71773	0.708739	3.57447	-0.870385	4.44485	TEAD1	-	-
chr8:129012106-129012159:mpeak_187814|chr8_128902873_129113225_PVT1_NR_+|	41.9283	2.35035	1.07425	-2.18789	0.0286773	0.175599	7.70595	6.69843	3.83234	2.3041	2.10652	0	61.6476	109.854	65.1498	80.6436	84.2607	78.9357	7.70615	2.71323	2.04779	-0.0431692	2.09096	PVT1	-	-
chr22:29195797-29196003:mpeak_122224|chr22_29191720_29196560_XBP1_NM_-|	2128.61	4.27638	0.831707	-5.14169	2.72275e-07	0.00126735	143.331	120.572	58.1238	48.3861	20.0119	15.2609	1330.05	994.047	1873.38	6073.61	3968.68	10897.9	7.67191	0.399514	1.94459	-2.31868	4.26327	XBP1	-	-
chr1:232599098-232599169:mpeak_18884|chr1_232535019_232651243_SIPA1L2_NM_-|	55.1706	2.58051	1.21733	-2.11982	0.0340214	0.191783	10.7883	12.0572	2.55489	0	4.21303	0	95.5538	100.476	137.964	103.685	63.1955	131.56	7.60503	4.23506	2.59192	0.162386	2.42953	SIPA1L2	-	-
chr15:75684039-75684106:mpeak_67779|chr15_75664550_75748124_SIN3A_NM_-|	58.1553	2.42143	1.16473	-2.07896	0.037621	0.203092	3.08238	12.0572	5.74851	1.15205	5.26629	0	117.13	60.2859	97.7247	99.0764	90.5802	205.759	7.59177	2.43478	1.70241	-0.523199	2.22561	SIN3A	-	-
chr1:111503752-111503900:mpeak_8612|chr1_111491021_111506566_LRIF1_NM_-|	59.3998	1.83851	0.92723	-1.9828	0.0473896	0.229759	7.70595	9.37781	8.30341	2.3041	6.31955	0	124.836	113.873	95.8085	122.117	106.379	115.772	7.58917	3.75738	1.55773	-0.0414507	1.59918	LRIF1	-	-
chr14:99886966-99887101:mpeak_62338|chr14_99865462_99947226_SETD3_NM_-|	281.848	1.86256	0.859911	-2.16599	0.0303121	0.180932	38.5297	71.0034	12.7745	13.8246	12.6391	7.36733	517.84	440.757	654.053	495.382	364.428	753.573	7.58426	2.0969	1.85409	-0.000655224	1.85475	SETD3	-	-
chr22:34157185-34157373:mpeak_122765|chr22_33670610_34316416_LARGE_NM_-|	42.4378	4.2571	1.44667	-2.94269	0.0032537	0.0710686	4.62357	10.7175	2.55489	0	1.05326	0	73.9771	52.2478	111.777	93.3161	85.314	73.6733	7.51926	1.25237	4.0867	-0.0841888	4.17089	LARGE	-	-
chr6:136951208-136951400:mpeak_167486|chr6_136878956_137113656_MAP3K5_NM_-|	71.3858	2.16539	0.825041	-2.62458	0.00867551	0.10521	6.16476	8.03812	10.2196	2.3041	5.26629	1.57871	132.542	92.4384	104.751	129.03	188.533	175.764	7.40677	1.85457	1.41651	-0.581252	1.99776	MAP3K5	-	-
chr12:77269027-77269184:mpeak_45732|chr12_77252808_77272820_CSRP2_NM_-|	44.221	3.69634	1.62131	-2.27985	0.0226166	0.155971	10.7883	0	8.30341	0	0	0	73.9771	103.156	210.779	29.9533	33.7043	59.9911	7.3825	#DIV/0!	Inf	1.64948	Inf	CSRP2	-	-
chr12:26923621-26923676:mpeak_40582|chr12_26492416_26986131_ITPR2_NM_-|	35.6138	2.91516	1.29235	-2.2557	0.0240892	0.161155	3.08238	9.37781	4.47107	2.3041	0	0	83.2243	66.9843	80.4792	73.7313	56.876	46.8352	7.33947	3.89552	2.87741	0.378591	2.49882	ITPR2	-	-
chr5:74715157-74715229:mpeak_151710|chr5_74670016_74807806_COL4A3BP_NM_-|	104.56	4.53316	1.22651	-3.69597	0.000219049	0.0297915	21.5767	17.4159	8.94213	0	2.10652	0	192.649	199.613	262.515	175.112	147.456	227.335	7.32076	1.14921	4.50814	0.251828	4.25631	COL4A3BP	-	-
chr7:138191610-138191670:mpeak_178162|chr7_138145078_138269486_TRIM24_NM_+|	55.5073	2.25104	1.07395	-2.09604	0.0360791	0.198365	12.3295	10.7175	5.74851	2.3041	2.10652	0	152.578	129.95	111.138	118.661	63.1955	57.3599	7.31472	2.76566	2.70679	0.718651	1.98814	TRIM24	-	-
chr1:93023991-93024120:mpeak_6874|chr1_92979527_93257961_EVI5_NM_-|	39.567	4.27409	1.4396	-2.96893	0.00298834	0.068497	0	8.03812	5.74851	0	0	0	95.5538	101.816	85.589	56.4505	63.1955	58.4124	7.30846	#DIV/0!	Inf	0.668242	Inf	EVI5	-	-
chr6:143656203-143656265:mpeak_167896|chr6_143380499_143660775_AIG1_NM_+|	54.0167	4.72708	1.42584	-3.31531	0.000915425	0.0467999	4.62357	4.01906	14.0519	1.15205	0	0	87.8478	77.7018	146.268	89.86	104.273	118.404	7.27815	1.10584	4.30007	-0.0033218	4.30339	AIG1	-	-
chr17:65230880-65231041:mpeak_85830|chr17_65074702_65241319_HELZ_NM_-|	149.974	1.6819	0.812021	-2.07125	0.0383352	0.204995	20.0355	25.454	14.6906	5.76025	5.26629	7.36733	186.484	237.125	430.5	226.954	193.8	446.25	7.04596	2.12155	1.71006	-0.0216189	1.73168	HELZ	-	-
chr6:139491672-139491819:mpeak_167728|chr6_139456248_139498077_HECA_NM_+|	87.0463	5.06972	1.33717	-3.7914	0.000149803	0.0253699	15.4119	16.0762	6.38724	0	1.05326	0	141.789	199.613	198.004	156.679	151.669	157.871	7.02167	0.677744	5.16833	0.210365	4.95796	HECA	-	-
chr17:9100042-9100098:mpeak_78840|chr17_8924858_9142956_NTN1_NM_+|	83.9804	2.61658	1.31347	-1.99211	0.0463585	0.226909	12.3295	24.1144	1.27745	1.15205	4.21303	0	138.707	241.144	157.765	178.568	148.509	99.9852	7.01641	1.88441	2.81371	0.332127	2.48158	NTN1	-	-
chr17:80494872-80494925:mpeak_87448|chr17_80477593_80559178_FOXK2_NM_+|	86.4224	5.18481	1.60481	-3.2308	0.00123444	0.0518906	0	9.37781	5.10979	0	1.05326	0	52.4005	72.3431	185.23	157.831	163.255	390.469	7.01073	0.444067	3.78189	-1.19883	4.98072	FOXK2	-	-
chr19:4476666-4476716:mpeak_91417|chr19_4472192_4501922_HDGFRP2_NM_+|	64.9207	5.61122	1.62866	-3.44529	0.000570437	0.0398031	0	5.35875	8.94213	0	0	0	49.3181	88.4193	168.623	115.205	100.06	243.122	7.00199	#DIV/0!	Inf	-0.581335	Inf	HDGFRP2	-	-
chr8:145621909-145621963:mpeak_188868|chr8_145618580_145634733_CPSF1_NM_-|	101.35	1.43521	0.724107	-1.98204	0.0474752	0.230069	24.659	12.0572	14.0519	3.45615	5.26629	2.63119	212.684	239.804	272.735	156.679	148.509	123.666	7.00035	2.64743	2.16077	0.757937	1.40283	CPSF1	-	-
chr10:80959775-80959826:mpeak_25352|chr10_80828791_81072398_ZMIZ1_NM_+|	121.358	4.50369	1.61794	-2.78359	0.00537611	0.0861726	18.4943	4.01906	0	0	2.10652	0	166.449	142.007	181.397	258.059	235.93	447.829	6.89391	0.670995	3.41785	-0.9431	4.36095	ZMIZ1	-	-
chr14:61923891-61923941:mpeak_58891|chr14_61788160_62016402_PRKCH_NM_+|	39.7287	3.20532	1.41401	-2.26683	0.0234009	0.158623	3.08238	9.37781	3.83234	0	1.05326	0.526238	66.2712	45.5493	125.19	70.2751	41.0771	110.51	6.87418	1.06789	3.36667	0.0952862	3.27139	PRKCH	-	-
chr1:114190017-114190121:mpeak_9008|chr1_113933474_114224833_MAGI3_NM_+|	131.405	2.74096	0.87512	-3.1321	0.00173562	0.0579835	16.9531	21.435	9.58085	5.76025	3.15978	0.526238	266.626	257.22	178.843	314.51	290.699	211.548	6.82649	1.15656	2.34428	-0.217022	2.56131	MAGI3	-	-
chr10:70688021-70688074:mpeak_24404|chr10_70661033_70706107_DDX50_NM_+|	148.057	1.85045	0.883921	-2.09345	0.0363087	0.199129	12.3295	14.7366	13.4132	11.5205	6.31955	4.2099	223.473	113.873	256.767	268.428	210.652	640.958	6.8134	1.96868	0.876407	-0.914738	1.79115	DDX50	-	-
chr17:60656352-60656420:mpeak_85068|chr17_60556385_60689752_TLK2_NM_+|	131.56	1.70178	0.799865	-2.12759	0.0333712	0.190212	10.7883	18.7556	12.1357	5.76025	11.5858	2.63119	200.355	245.163	167.984	266.124	222.238	415.202	6.79374	2.21095	1.06098	-0.558558	1.61954	TLK2	-	-
chr11:118379845-118379903:mpeak_37638|chr11_118307204_118392611_KMT2A_NM_+|	104.107	1.59309	0.776196	-2.05244	0.0401274	0.210674	9.24714	14.7366	8.94213	3.45615	5.26629	6.31486	151.037	147.366	192.256	153.223	213.812	343.633	6.71055	2.11594	1.13067	-0.534458	1.66513	KMT2A	-	-
chr1:23416038-23416154:mpeak_1908|chr1_23415546_23495351_LUZP1_NM_-|	32.0509	3.17739	1.43447	-2.21503	0.0267577	0.16947	1.54119	10.7175	3.83234	1.15205	0	0	73.9771	77.7018	88.1439	50.6902	32.651	44.204	6.70955	2.70975	3.80398	0.91096	2.89302	LUZP1	-	-
chr3:99998387-99998617:mpeak_130246|chr3_99979660_100042430_TBC1D23_NM_+|	48.8333	3.36835	1.34678	-2.50104	0.0123829	0.121333	7.70595	8.03812	3.19362	0	2.10652	0	126.378	50.9081	107.944	100.228	66.3553	113.141	6.63945	2.2592	3.16833	0.0281168	3.14021	TBC1D23	-	-
chr14:99972898-99972975:mpeak_62383|chr14_99947738_99976493_CCNK_NM_+|	93.6832	4.45503	1.38451	-3.21776	0.00129197	0.0528609	15.4119	10.7175	6.38724	2.3041	0	0	94.0126	101.816	296.368	149.767	150.616	296.798	6.60643	1.15749	3.8189	-0.278933	4.09783	CCNK	-	-
chr10:114832837-114832923:mpeak_28077|chr10_114710008_114925313_TCF7L2_NM_+|	41.5088	5.21194	1.57801	-3.30287	0.000957012	0.0473525	3.08238	5.35875	6.38724	0	0	0	55.4828	36.1715	132.855	58.7546	58.9825	141.032	6.6048	#DIV/0!	Inf	-0.204892	Inf	TCF7L2	-	-
chr10:99126251-99126386:mpeak_26841|chr10_99116953_99161127_RRP12_NM_-|	36.8298	3.55543	1.4188	-2.50594	0.0122126	0.120557	3.08238	6.69843	7.66468	0	1.05326	0	109.424	71.0034	84.9502	69.123	31.5978	57.3599	6.57383	1.99884	4.04992	0.747388	3.30254	RRP12	-	-
chr13:20238577-20238706:mpeak_50536|chr13_20207787_20245973_MPHOSPH8_NM_+|	86.0877	2.22733	0.924541	-2.40912	0.0159909	0.135291	6.16476	9.37781	10.8583	2.3041	5.26629	1.57871	110.966	213.01	79.2017	195.849	152.723	245.753	6.5482	1.53941	1.52888	-0.559835	2.08872	MPHOSPH8	-	-
chr10:956027-956218:mpeak_19917|chr10_859153_977645_LARP4B_NM_-|	168.136	2.78675	1.05669	-2.63724	0.00835843	0.103888	12.3295	14.7366	10.2196	5.76025	8.42607	0	127.919	154.064	292.535	341.007	361.268	689.372	6.4899	1.52909	1.39412	-1.27637	2.67049	LARP4B	-	-
chr1:202920053-202920239:mpeak_16613|chr1_202910829_202927700_ADIPOR1_NM_-|	98.4483	2.26425	1.13983	-1.98647	0.0469806	0.228649	21.5767	17.4159	5.74851	3.45615	3.15978	0	147.954	133.969	411.977	131.334	131.657	173.132	6.44778	2.27548	2.75759	0.66999	2.08759	ADIPOR1	-	-
chr14:55322797-55322965:mpeak_58110|chr14_55310861_55369542_GCH1_NM_-|	65.4181	4.66552	1.80309	-2.58751	0.00966713	0.110481	16.9531	0	3.19362	0	0	0	67.8124	100.476	302.116	76.0354	55.8227	162.608	6.42426	#DIV/0!	Inf	0.675805	Inf	GCH1	-	-
chr12:14578240-14578412:mpeak_39906|chr12_14518565_14650587_ATF7IP_NM_+|	203.428	2.16779	0.973092	-2.22774	0.0258981	0.166551	26.2002	6.69843	13.4132	2.3041	12.6391	7.89357	149.495	159.423	416.448	349.071	508.724	788.831	6.38462	1.38688	1.02002	-1.18273	2.20275	ATF7IP	-	-
chr5:56542119-56542192:mpeak_150238|chr5_56469774_56558420_GPBP1_NM_+|	186.233	3.97112	0.95838	-4.14357	3.41941e-05	0.015575	21.5767	8.03812	17.2455	1.15205	0	3.68367	189.566	217.029	329.581	420.499	344.416	682.005	6.36536	0.501312	3.27656	-0.974859	4.25142	GPBP1	-	-
chr10:91394438-91394557:mpeak_26032|chr10_91344222_91405329_PANK1_NM_-|	47.6478	3.77448	1.43363	-2.63282	0.00846798	0.104347	4.62357	9.37781	8.30341	0	1.05326	0	61.6476	101.816	187.785	64.5148	54.7695	77.8832	6.35014	1.60258	4.40442	0.83307	3.57135	PANK1	-	-
chr1:10423356-10423410:mpeak_854|chr1_10270763_10436602_KIF1B_NM_+|	87.0916	1.57004	0.78032	-2.01205	0.0442146	0.221541	9.24714	13.3969	8.94213	3.45615	4.21303	3.15743	218.849	136.648	143.713	173.96	123.231	206.285	6.32723	2.15037	1.54471	-0.0122774	1.55699	KIF1B	-	-
chr11:89940221-89940284:mpeak_36437|chr11_89935719_89956532_CHORDC1_NM_-|	68.9077	4.06028	1.27908	-3.17436	0.00150166	0.0560384	6.16476	12.0572	5.74851	0	0	1.05248	147.954	132.629	99.6409	158.983	93.74	168.922	6.3043	0.748835	4.5094	-0.14918	4.65858	CHORDC1	-	-
chr12:112107559-112107624:mpeak_48334|chr12_112082366_112123800_BRAP_NM_-|	44.0884	4.42309	1.51721	-2.91528	0.00355367	0.0737708	0	5.35875	7.02596	0	0	0	118.672	64.305	112.415	87.5559	85.314	48.4139	6.28895	#DIV/0!	Inf	0.416733	Inf	BRAP	-	-
chr6:33625697-33625751:mpeak_161655|chr6_33589155_33663488_ITPR3_NM_+|	92.2857	3.30913	1.25536	-2.63599	0.00838919	0.104086	18.4943	5.35875	5.74851	1.15205	3.15978	0	92.4714	113.873	266.986	135.942	134.817	329.425	6.25387	1.07763	2.7793	-0.342555	3.12186	ITPR3	-	-
chr1:10002679-10002737:mpeak_790|chr1_9990515_10002826_LZIC_NM_-|	69.7726	2.78385	1.11843	-2.48907	0.0128077	0.123239	12.3295	5.35875	7.66468	2.3041	2.10652	0	171.072	72.3431	164.152	120.965	92.6868	186.288	6.22056	1.65423	2.5231	0.0272528	2.49585	LZIC	-	-
chr17:11931118-11931179:mpeak_78940|chr17_11924134_12044463_MAP2K4_NM_+|	106.558	2.84449	1.03463	-2.74929	0.00597238	0.0902249	10.7883	16.0762	9.58085	2.3041	4.21303	0	194.19	176.839	219.082	180.872	114.805	349.948	6.17603	1.51414	2.48343	-0.129712	2.61314	MAP2K4	-	-
chr2:44128447-44128612:mpeak_100605|chr2_44115795_44223144_LRPPRC_NM_-|	307.541	1.59705	0.734372	-2.17471	0.0296517	0.178704	41.6121	34.8319	40.2396	13.8246	11.5858	8.41981	493.181	420.662	990.022	435.475	390.759	809.88	6.12878	2.06772	1.78622	0.218657	1.56756	LRPPRC	-	-
chr2:201936303-201936385:mpeak_110869|chr2_201846594_201936392_FAM126B_NM_-|	66.7343	2.2694	1.0602	-2.14055	0.0323104	0.186953	12.3295	5.35875	2.55489	1.15205	3.15978	1.05248	66.2712	160.762	109.222	133.638	124.285	181.026	6.02018	1.22208	1.91597	-0.384494	2.30047	FAM126B	-	-
chr4:143575753-143575811:mpeak_145611|chr4_142950067_143767604_INPP4B_NM_-|	74.6914	2.42269	0.925963	-2.6164	0.00888635	0.106285	9.24714	5.35875	7.02596	2.3041	1.05326	2.10495	147.954	68.324	145.629	193.545	152.723	161.029	5.97718	1.07675	1.98557	-0.487208	2.47278	INPP4B	-	-
chr17:60607786-60607926:mpeak_85045|chr17_60556385_60689752_TLK2_NM_+|	130.851	1.79643	0.904803	-1.98543	0.0470962	0.228966	3.08238	18.7556	14.6906	3.45615	10.5326	2.63119	200.355	245.163	167.984	266.124	222.238	415.202	5.95412	1.83938	1.13611	-0.558558	1.69467	TLK2	-	-
chr13:42787267-42787379:mpeak_52701|chr13_42712177_42830419_DGKH_NR_+mpeak_52701|chr13_42614171_42803234_DGKH_NM_+||	114.51	2.8158	0.962101	-2.92672	0.00342556	0.0727691	15.4119	9.37781	15.9681	5.76025	1.05326	0	164.907	304.109	216.527	193.545	213.812	233.65	5.94533	1.59441	2.58061	0.0969109	2.48369	DGKH	-	-
chr12:50205758-50205870:mpeak_42504|chr12_50185834_50222208_NCKAP5L_NM_-|	53.5114	3.93111	1.4975	-2.62511	0.00866204	0.105167	0	10.7175	7.02596	0	0	0	107.883	125.931	213.972	51.8423	63.1955	61.5699	5.94372	#DIV/0!	Inf	1.34226	Inf	NCKAP5L	-	-
chr14:64468349-64468510:mpeak_59105|chr14_64319682_64692036_SYNE2_NM_+|	70.3397	2.48539	1.24333	-1.99898	0.0456103	0.225041	3.08238	16.0762	1.91617	2.3041	3.15978	0	126.378	136.648	92.6149	185.48	190.64	85.7768	5.92587	1.77438	1.94752	-0.377151	2.32467	SYNE2	-	-
chr9:135192074-135192148:mpeak_196670|chr9_135140372_135230372_SETX_NM_-|	75.0297	2.31681	1.00548	-2.30419	0.0212121	0.151351	3.08238	9.37781	6.38724	5.76025	2.10652	0	131.001	93.7781	99.0022	229.258	166.415	154.188	5.82103	2.14603	1.26052	-0.764046	2.02457	SETX	-	-
chr6:158500313-158500363:mpeak_169312|chr6_158402887_158516649_SYNJ2_NM_+|	106.4	2.20374	0.954382	-2.30908	0.0209394	0.150556	12.3295	8.03812	10.8583	8.06436	2.10652	0	135.625	211.67	197.366	226.954	224.344	239.438	5.7331	2.2087	1.6183	-0.342777	1.96108	SYNJ2	-	-
chr11:33149064-33149122:mpeak_31628|chr11_33106835_33183037_CSTF3_NM_-|	51.4136	3.69931	1.59885	-2.31373	0.0206823	0.150031	1.54119	2.67937	8.30341	2.3041	0	0	32.365	40.1906	147.545	78.3395	74.7814	228.914	5.69011	1.80934	2.44242	-0.795538	3.23795	CSTF3	-	-
chr3:145841914-145841999:mpeak_133820|chr3_145788659_145879282_PLOD2_NM_-|	181.101	2.52961	1.06163	-2.38276	0.0171832	0.139367	23.1178	17.4159	20.4392	4.6082	5.26629	1.05248	174.154	166.121	731.338	319.118	211.705	498.874	5.68982	1.06118	2.48028	0.057566	2.42271	PLOD2	-	-
chr14:89056268-89056322:mpeak_61404|chr14_89029252_89078088_ZC3H14_NM_+|	116.663	1.80736	0.859032	-2.10395	0.0353832	0.196321	7.70595	6.69843	14.6906	3.45615	1.05326	8.41981	197.272	178.178	137.964	343.311	300.179	201.023	5.66696	1.53097	1.17014	-0.717994	1.88813	ZC3H14	-	-
chr10:96360570-96360745:mpeak_26550|chr10_96305523_96361284_HELLS_NM_+|	107.914	3.14733	1.14329	-2.75287	0.00590757	0.0897049	0	9.37781	8.94213	2.3041	2.10652	0	154.119	150.045	180.759	248.843	179.054	359.421	5.66686	0.840313	2.05436	-0.699191	2.75355	HELLS	-	-
chr10:97416346-97416503:mpeak_26611|chr10_97366700_97416567_ALDH18A1_NM_-|	165.903	2.90934	1.46272	-1.989	0.0467016	0.22792	9.24714	10.7175	21.7166	2.3041	7.37281	0	81.6831	87.0796	572.935	243.083	144.296	810.407	5.61971	1.21185	2.10678	-0.691467	2.79825	ALDH18A1	-	-
chr1:153832825-153832878:mpeak_12368|chr1_153782786_153895451_GATAD2B_NM_-|	140.127	3.26262	1.37315	-2.37601	0.017501	0.140115	9.24714	17.4159	0	0	3.15978	0.526238	195.731	233.105	287.426	299.533	284.38	351.001	5.58379	0.591394	2.85471	-0.384346	3.23905	GATAD2B	-	-
chr5:122702273-122702382:mpeak_154581|chr5_122682447_122759286_CEP120_NM_-|	71.6627	2.43923	1.07571	-2.26756	0.0233562	0.158623	9.24714	14.7366	2.55489	1.15205	2.10652	0.526238	160.284	140.667	176.288	118.661	106.379	127.35	5.56086	1.07404	2.8098	0.437538	2.37226	CEP120	-	-
chr7:862845-862901:mpeak_170009|chr7_855193_912851_SUN1_NM_+|	77.1011	3.86694	1.78689	-2.16407	0.0304592	0.181231	3.08238	17.4159	0.638724	2.3041	0	0	46.2357	53.5875	286.148	103.685	95.8465	316.269	5.47632	1.34011	3.1975	-0.418319	3.61581	SUN1	-	-
chr10:878860-878921:mpeak_19899|chr10_859153_977645_LARP4B_NM_-|	167.211	3.0337	1.02455	-2.96101	0.00306629	0.0693125	3.08238	18.7556	9.58085	0	5.26629	3.68367	127.919	154.064	292.535	341.007	361.268	689.372	5.46873	0.96468	1.81168	-1.27637	3.08805	LARP4B	-	-
chr10:91368994-91369052:mpeak_26027|chr10_91344222_91405329_PANK1_NM_-|	47.3703	3.45562	1.44277	-2.39513	0.0166144	0.137441	7.70595	6.69843	4.47107	1.15205	0	0	61.6476	101.816	187.785	64.5148	54.7695	77.8832	5.37382	1.7529	4.03423	0.83307	3.20116	PANK1	-	-
chr4:106671979-106672087:mpeak_143777|chr4_106629940_106766597_GSTCD_NM_+|	68.2339	2.28503	1.07577	-2.12408	0.0336631	0.191048	4.62357	13.3969	4.47107	0	2.10652	1.57871	110.966	105.835	203.753	115.205	90.5802	166.291	5.34807	1.48567	2.60955	0.176691	2.43286	GSTCD	-	-
chr6:24713221-24713295:mpeak_160379|chr6_24706490_24719403_C6orf62_NM_-|	302.41	1.80438	0.88919	-2.02924	0.0424336	0.216444	21.5767	49.5684	22.994	3.45615	18.9587	4.73614	533.252	412.623	817.566	528.791	420.25	795.146	5.33837	1.55665	1.79379	0.0158387	1.77795	C6orf62	-	-
chr20:40245428-40245538:mpeak_116412|chr20_40034129_40247133_CHD6_NM_-|	67.5229	2.24249	1.11178	-2.01703	0.0436925	0.220071	6.16476	12.0572	6.38724	1.15205	3.15978	0	137.166	168.801	157.126	95.6202	57.9292	164.713	5.3141	2.03221	2.51283	0.541085	1.97174	CHD6	-	-
chr5:36982285-36982336:mpeak_149287|chr5_36876860_37063891_NIPBL_NM_+|	81.2905	4.38021	1.3099	-3.34394	0.000825976	0.0451974	6.16476	1.33969	10.2196	0	2.10652	0	98.6362	108.515	129.022	176.264	169.575	273.644	5.27229	1.02013	3.07277	-0.881859	3.95463	NIPBL	-	-
chr22:43328376-43328435:mpeak_123726|chr22_43267475_43411184_PACSIN2_NM_-|	70.1182	4.81663	1.61313	-2.9859	0.00282745	0.0671668	4.62357	8.03812	3.83234	0	1.05326	0	66.2712	69.6637	177.565	71.4271	83.2074	355.737	5.26125	0.619113	3.96901	-0.703082	4.67209	PACSIN2	-	-
chr4:68512812-68512949:mpeak_141250|chr4_68484850_68566889_UBA6_NM_-|	67.1868	3.025	1.19853	-2.52392	0.0116054	0.118396	1.54119	13.3969	4.47107	2.3041	1.05326	0	115.589	88.4193	165.429	149.767	133.764	130.507	5.25369	1.21632	2.53134	-0.164429	2.69576	UBA6	-	-
chr5:175875401-175875478:mpeak_158137|chr5_175875355_175933768_FAF2_NM_+|	124.059	5.71197	1.71017	-3.34001	0.000837757	0.0452861	16.9531	2.67937	5.74851	1.15205	0	0	86.3066	71.0034	332.775	164.743	130.604	676.742	5.17889	0.355539	4.46147	-0.988057	5.44953	FAF2	-	-
chr11:77489595-77489647:mpeak_35590|chr11_77378536_77531880_RSF1_NM_-|	46.511	3.67202	1.4398	-2.55037	0.0107608	0.114682	1.54119	5.35875	10.2196	0	1.05326	0	115.589	133.969	81.7566	87.5559	72.6748	48.4139	5.16715	1.51443	4.02271	0.667154	3.35556	RSF1	-	-
chr13:47258980-47259091:mpeak_53119|chr13_47127295_47324674_LRCH1_NM_+|	114.185	2.50456	1.25688	-1.99267	0.0462971	0.22677	0	16.0762	3.19362	1.15205	4.21303	0	177.237	180.858	202.475	252.299	220.131	312.585	5.15632	1.02516	1.84467	-0.485827	2.3305	LRCH1	-	-
chr20:40041224-40041279:mpeak_116330|chr20_40034129_40247133_CHD6_NM_-|	66.6104	2.7196	1.38202	-1.96784	0.0490865	0.234732	0	9.37781	6.38724	1.15205	1.05326	0	137.166	168.801	157.126	95.6202	57.9292	164.713	5.10645	1.03938	2.83768	0.541085	2.29659	CHD6	-	-
chr1:171560497-171560645:mpeak_14242|chr1_171454665_171560725_PRRC2C_NM_+|	130.454	3.43347	0.993645	-3.45543	0.00054941	0.0398031	7.70595	8.03812	8.30341	1.15205	3.15978	1.05248	97.095	131.289	243.992	273.036	285.433	505.189	5.09074	0.504326	2.16442	-1.17102	3.33545	PRRC2C	-	-
chrX:47103893-47103949:mpeak_198897|chrX_47092313_47107191_USP11_NM_+|	242.61	3.29159	1.61277	-2.04095	0.0412558	0.21342	20.0355	0	1.91617	1.15205	0	0	610.311	676.542	707.706	315.662	253.835	324.163	1.65086	0.386741	4.25205	1.15827	3.09378	USP11	chrX:47103949:+	chrX_47244546_+
chr9:136217386-136217450:mpeak_196807|chr9_136215068_136218116_RPL7A_NM_+|	4840.11	2.52165	1.19474	-2.11063	0.0348043	0.194503	4.62357	6.69843	12.1357	3.45615	1.05326	0.526238	4939.51	5373.48	18148.1	7514.83	5891.93	16185	0.0824205	0.0170171	2.21982	-0.0562054	2.27602	RPL7A	chr9:136217450:+	chr9_133350525_+;chr9_133350594_+;chr9_133350626_+
chr9:132895460-132895519:mpeak_196422|chr9_132815984_132897303_GPR107_NM_+|	338.653	4.19992	1.51434	-2.77344	0.00554676	0.0874643	1.54119	0	8.94213	0	0	0	937.043	763.621	693.654	625.564	631.955	401.52	0.656762	#DIV/0!	Inf	0.529268	Inf	GPR107	chr9:132895518:+	chr9_130133239_+
chr9:116021601-116021652:mpeak_194554|chr9_115983807_116022551_SLC31A1_NM_+|	377.179	3.10826	1.36418	-2.27848	0.0226981	0.156195	4.62357	1.33969	7.66468	1.15205	0	0	1017.19	787.736	1142.04	555.288	440.262	568.863	0.462441	0.220923	3.56429	0.913605	2.65069	SLC31A1	chr9:116021654:+	-
chr8:95503749-95503861:mpeak_184505|chr8_95501088_95565746_KIAA1429_NM_-|	130.809	2.90915	1.09587	-2.65464	0.00793933	0.101075	13.8707	5.35875	3.19362	2.3041	2.10652	0	265.085	192.915	219.082	243.083	232.77	389.942	3.31172	0.764145	2.34593	-0.354696	2.70063	KIAA1429	chr8:95503805:-	chr8_94491577_-
chr8:144883090-144883206:mpeak_188727|chr8_144873478_144897549_SCRIB_NM_-|	219.318	4.76796	1.43812	-3.3154	0.000915107	0.0467999	10.7883	0	8.30341	0	0	0	530.169	420.662	617.646	309.902	321.244	413.097	1.82582	#DIV/0!	Inf	0.586907	Inf	SCRIB	chr8:144883097:-	-
chr8:101965476-101965560:mpeak_185494|chr8_101932980_101965623_YWHAZ_NM_-|	1182.78	1.86889	0.938571	-1.99121	0.0464579	0.227186	4.62357	12.0572	22.3553	5.76025	2.10652	1.05248	2780.31	2051.06	3449.75	1873.23	1429.27	2561.73	0.471387	0.152096	2.12981	0.497882	1.63193	YWHAZ	chr8:101965475:-	chr8_100953248_-;chr8_100953311_-
chr7:99045492-99045564:mpeak_175467|chr7_99036562_99054054_CPSF4_NM_+|	220.479	4.20033	1.32003	-3.18199	0.00146268	0.0555942	3.08238	8.03812	6.38724	1.15205	0	0	419.204	447.455	483.514	406.674	495.032	375.208	1.2967	0.270665	3.92572	0.0804835	3.84523	CPSF4	chr7:99045560:+	chr7_99447937_+
chr6:91295673-91295755:mpeak_165117|chr6_91226400_91297020_MAP3K7_NM_-|	150.671	3.39126	1.33159	-2.54677	0.0108724	0.115134	12.3295	0	5.10979	2.3041	0	0	241.967	266.598	355.13	296.077	285.433	343.107	3.02873	0.747585	2.92007	-0.0983349	3.0184	MAP3K7	chr6:91295679:-;chr6:91295710:-	chr6_90585913_-;chr6_90585961_-
chr6:47522396-47522511:mpeak_163017|chr6_47445524_47591921_CD2AP_NM_+|	70.2137	2.2574	1.11799	-2.01915	0.0434712	0.219461	6.16476	6.69843	5.10979	2.3041	1.05326	0	191.108	115.213	178.204	95.6202	96.8998	144.189	3.70941	1.49566	2.42043	0.525066	1.89536	CD2AP	chr6:47522553:+	-
chr6:100010648-100010821:mpeak_165376|chr6_99991485_100016690_CCNC_NM_-|	173.926	2.56756	1.27162	-2.01912	0.0434745	0.219461	0	4.01906	17.8843	2.3041	1.05326	0.526238	317.485	275.975	521.837	319.118	215.918	410.992	2.94585	0.410516	2.49568	0.237474	2.25821	CCNC	chr6:100010646:-	chr6_99562772_-
chr5:96052087-96052151:mpeak_152969|chr5_95997740_96108343_CAST_NM_+|	86.4094	4.17681	1.62216	-2.57485	0.0100283	0.111965	0	2.67937	10.2196	1.15205	0	0	95.5538	105.835	272.735	131.334	131.657	285.747	4.08088	0.629836	3.48498	-0.210854	3.69583	CAST	chr5:96052143:+	chr5_96716419_+
chr5:459463-459576:mpeak_147836|chr5_443333_466841_EXOC3_NM_+|	156.741	2.84766	1.09744	-2.59481	0.00946426	0.109272	12.3295	9.37781	3.19362	1.15205	2.10652	0	349.85	350.998	325.749	307.598	264.368	254.173	2.42558	0.59165	2.93389	0.313414	2.62048	EXOC3	chr5:459578:+	-
chr5:179998177-179998429:mpeak_158796|chr5_179921398_180000987_CNOT6_NM_+|	159.212	4.06297	1.4702	-2.76355	0.00571757	0.0884626	0	2.67937	12.1357	0	1.05326	0	332.897	357.696	308.503	331.791	259.102	304.692	2.22428	0.352817	3.81414	0.157796	3.65634	CNOT6	chr5:179998228:+;chr5:179998431:+	chr5_180571222_+;chr5_180571429_+
chr4:83294593-83294669:mpeak_141959|chr4_83275307_83295149_HNRNPD_NM_-mpeak_141959|chr4_83275307_83295149_HNRNPD_NM_-||	539.775	2.31165	1.0074	-2.29467	0.021752	0.153171	30.8238	16.0762	17.8843	4.6082	7.37281	3.15743	707.406	513.1	1773.74	639.388	628.795	2134.95	2.16363	0.444839	2.09743	-0.184672	2.2821	HNRNPD	chr4:83294598:-	chr4_82373463_-
chr4:54143500-54143651:mpeak_140874|chr4_53740228_54232242_SCFD2_NM_-|	48.6076	3.52481	1.52557	-2.31049	0.0208612	0.150226	1.54119	1.33969	10.2196	1.15205	0	0	101.719	81.7209	148.823	78.3395	53.7162	104.721	3.94281	1.45967	3.50734	0.488792	3.01855	SCFD2	chr4:54143511:-	chr4_53277346_-
chr4:40936202-40936258:mpeak_140230|chr4_40818276_41216635_APBB2_NM_-|	149.541	3.31827	1.19352	-2.78024	0.00543183	0.0866282	13.8707	5.35875	3.19362	4.6082	0	0	184.943	154.064	306.587	300.685	328.617	492.559	3.47325	1.23229	2.28271	-0.797194	3.0799	APBB2	chr4:40936203:-	chr4_40934189_-
chr3:99865843-99865908:mpeak_130226|chr3_99536677_99897148_CMSS1_NM_+|	204.751	2.45408	1.11635	-2.19831	0.0279273	0.173484	9.24714	2.67937	10.2196	1.15205	2.10652	0	577.946	368.414	561.438	390.545	248.569	284.695	1.46877	0.529098	2.76474	0.706777	2.05797	CMSS1	chr3:99865872:+	chr3_100147028_+
chr3:3182292-3182405:mpeak_124255|chr3_3168599_3189589_TRNT1_NM_+|	67.9856	4.3259	1.53374	-2.82048	0.0047952	0.082547	1.54119	0	8.94213	1.15205	0	0	120.213	80.3812	121.357	147.463	122.178	212.6	4.88427	0.716686	3.18582	-0.58291	3.76873	TRNT1	chr3:3182408:+	chr3_3140728_+
chr3:196134000-196134274:mpeak_137441|chr3_196083717_196159345_UBXN7_NM_-|	277.74	2.32982	0.836243	-2.78606	0.00533537	0.0860263	13.8707	18.7556	7.02596	0	5.26629	2.10495	503.969	637.691	526.308	516.119	475.02	626.75	2.37728	0.683414	2.42742	0.0439801	2.38344	UBXN7	chr3:196133991:-	chr3_196407121_-
chr3:194897293-194897347:mpeak_137246|chr3_194790840_194991895_XXYLT1_NM_-|	179.118	2.83241	1.21264	-2.33575	0.0195043	0.146303	6.16476	5.35875	6.38724	1.15205	1.05326	0	525.546	396.547	364.711	338.703	247.516	256.278	1.39188	0.392638	3.02177	0.61105	2.41072	XXYLT1	chr3:194897300:-	-
chr3:183542122-183542177:mpeak_136500|chr3_183535224_183543393_MAP6D1_NM_-|	84.681	3.03358	1.09143	-2.77946	0.00544491	0.086706	6.16476	2.67937	8.94213	1.15205	2.10652	0	160.284	152.724	161.597	200.457	151.669	168.396	3.74759	0.939028	2.44845	-0.133232	2.58169	MAP6D1	chr3:183542121:-	chr3_183824334_-
chr22:46722621-46722673:mpeak_123961|chr22_46692637_46725943_GTSE1_NM_+|	86.2882	2.32035	0.872022	-2.66088	0.00779364	0.100547	9.24714	5.35875	5.10979	1.15205	4.21303	1.05248	149.495	136.648	110.499	194.697	205.385	212.6	4.97064	1.04745	1.61925	-0.627299	2.24655	GTSE1	chr22:46722672:+	chr22_46326775_+
chr22:41652466-41652520:mpeak_123468|chr22_41642676_41682255_RANGAP1_NM_-|	873.296	1.92177	0.976763	-1.96749	0.0491272	0.234812	3.08238	6.69843	7.02596	1.15205	3.15978	0	2237.81	1872.88	1935.33	1667.02	1427.17	1318.23	0.277981	0.146581	1.96267	0.45442	1.50825	RANGAP1	chr22:41652468:-	chr22_41256465_-
chr22:40746028-40746081:mpeak_123309|chr22_40742503_40762439_ADSL_NM_+|	233.849	2.58017	1.18247	-2.18202	0.0291081	0.17711	4.62357	2.67937	10.8583	1.15205	0	1.05248	750.559	403.246	468.184	524.183	360.214	279.432	1.11969	0.28413	3.04232	0.478884	2.56344	ADSL	chr22:40746082:+	chr22_40350076_+
chr21:46219901-46219957:mpeak_120898|chr21_46191404_46221751_UBE2G2_NM_-|	177.065	2.00659	0.842402	-2.38199	0.0172195	0.139406	7.70595	6.69843	9.58085	1.15205	0	4.73614	365.262	288.033	297.006	405.522	324.404	414.676	2.52396	0.771648	2.02625	-0.268388	2.29464	UBE2G2	chr21:46219902:-	chr21_44799988_-
chr20:61846628-61846792:mpeak_118728|chr20_61828086_61847538_YTHDF1_NM_-|	225.055	4.92972	1.41335	-3.48798	0.000486694	0.0385179	6.16476	9.37781	2.55489	1.15205	0	0	379.133	245.163	376.847	508.054	380.226	791.988	1.80768	0.20569	3.97351	-0.747045	4.72056	YTHDF1	chr20:61846721:-	chr20_63215373_-
chr20:46280871-46280924:mpeak_117006|chr20_46130600_46282149_NCOA3_NM_+|	2916.22	2.286	0.98272	-2.32619	0.0200083	0.147611	9.24714	4.01906	4.47107	0	0	2.63119	4993.46	5510.13	6225.64	4934.23	5823.47	7487.31	0.106026	0.0432643	2.753	-0.125132	2.87813	NCOA3	chr20:46280923:+	chr20_47652177_+
chr20:46258961-46259020:mpeak_116985|chr20_46130600_46282149_NCOA3_NM_+|	2919.02	2.79465	0.817199	-3.41979	0.000626696	0.0410532	6.16476	17.4159	22.3553	2.3041	4.21303	1.57871	4993.46	5510.13	6225.64	4934.23	5823.47	7487.31	0.274585	0.0443729	2.50437	-0.125132	2.6295	NCOA3	chr20:46259018:+	chr20_47630271_+
chr20:45317161-45317216:mpeak_116805|chr20_45315870_45318276_TP53RK_NM_-|	116.962	3.68201	1.11674	-3.29712	0.000976814	0.0474661	6.16476	8.03812	4.47107	3.45615	0	0	166.449	164.781	155.849	342.159	202.226	349.948	3.83387	1.15935	2.43379	-0.876658	3.31045	TP53RK	chr20:45317160:-	-
chr20:43375790-43375841:mpeak_116565|chr20_43374487_43378769_KCNK15_NM_+|	76.9426	3.18844	1.39537	-2.28502	0.0223116	0.155082	15.4119	8.03812	2.55489	1.15205	1.05326	0	291.285	158.083	94.5311	147.463	114.805	88.9342	4.7812	0.941898	3.55973	0.631038	2.92869	KCNK15	chr20:43375790:+;chr20:43375842:+	chr20_44747177_+;chr20_44747200_+
chr20:40114209-40114326:mpeak_116355|chr20_40034129_40247133_CHD6_NM_-|	66.6461	2.69116	1.34729	-1.99745	0.0457761	0.225379	3.08238	9.37781	3.83234	0	2.10652	0	137.166	168.801	157.126	95.6202	57.9292	164.713	3.5182	1.98564	2.95128	0.541085	2.41019	CHD6	chr20:40114206:-;chr20:40114245:-	chr20_41485570_-;chr20_41485606_-
chr2:99224765-99224864:mpeak_104407|chr2_99217256_99224981_COA5_NM_-|	105.077	2.70749	1.11982	-2.41779	0.0156152	0.133832	3.08238	8.03812	7.02596	2.3041	1.05326	0	218.849	146.026	288.064	208.521	166.415	211.548	2.7792	0.858684	2.43429	0.154857	2.27943	COA5	chr2:99224769:-	-
chr2:208453503-208453559:mpeak_111483|chr2_208394615_208461637_CREB1_NM_+|	121.344	4.07097	1.2756	-3.19141	0.00141582	0.0545978	12.3295	5.35875	2.55489	0	2.10652	0	221.931	168.801	173.733	283.404	273.847	312.059	3.58626	0.726961	3.2645	-0.622989	3.88749	CREB1	chr2:208453560:+	chr2_207588842_+
chr17:8109808-8109966:mpeak_78714|chr17_8108362_8113944_AURKB_NM_-|	1209.42	2.27661	1.11714	-2.03789	0.0415611	0.213968	12.3295	8.03812	3.19362	6.9123	0	0	2341.07	2036.32	2080.32	2646.26	1956.95	3421.6	0.364854	0.25841	1.76918	-0.313445	2.08262	AURKB	chr17:8109851:-	-
chr17:72998644-72998783:mpeak_86383|chr17_72983726_72999277_CDR2L_NM_+|	107.313	2.74415	1.25807	-2.18125	0.0291652	0.177198	1.54119	4.01906	7.66468	0	1.05326	1.05248	131.001	198.274	280.4	208.521	121.125	333.109	2.16918	0.476587	2.65086	-0.120436	2.7713	CDR2L	chr17:72998700:+	chr17_75002590_+;chr17_75002632_+
chr17:66429539-66429598:mpeak_86118|chr17_66417961_66453653_WIPI1_NM_-|	66.393	2.89447	1.3038	-2.22003	0.0264167	0.168148	7.70595	1.33969	5.74851	0	2.10652	0	169.531	100.476	153.932	134.79	88.4737	132.612	3.48968	1.77578	2.81209	0.252486	2.55961	WIPI1	chr17:66429540:-	chr17_68433400_-
chr17:26961327-26961381:mpeak_80213|chr17_26942264_26972177_KIAA0100_NM_-|	298.22	1.83945	0.865681	-2.12486	0.0335983	0.19089	7.70595	9.37781	10.2196	3.45615	1.05326	1.05248	630.347	606.878	922.956	483.861	387.599	514.135	1.26394	0.401408	2.29543	0.640646	1.65478	KIAA0100	chr17:26961330:-	chr17_28634313_-
chr16:68715220-68715289:mpeak_74898|chr16_68678150_68732093_CDH3_NM_+|	513.081	3.0537	1.22323	-2.49643	0.0125449	0.121982	9.24714	4.01906	10.8583	2.3041	1.05326	0	712.03	858.739	1673.46	595.61	694.097	1595.55	0.743614	0.174544	2.8451	0.169172	2.67593	CDH3	chr16:68715259:+	chr16_68681354_+
chr16:2810790-2810901:mpeak_70455|chr16_2802329_2820858_SRRM2_NM_+|	205.754	4.12175	1.33849	-3.07941	0.0020741	0.0615769	20.0355	1.33969	4.47107	4.6082	1.05326	0	104.801	136.648	311.697	470.037	478.179	936.177	4.67259	0.450659	2.19071	-1.76837	3.95907	SRRM2	chr16:2810847:+	chr16_2760842_+
chr16:18812743-18812836:mpeak_71922|chr16_18804692_18812857_ARL6IP1_NM_-|	521.372	5.04273	1.4929	-3.37781	0.000730662	0.0427054	27.7414	10.7175	10.8583	1.15205	0	0	827.619	805.152	2164.63	580.634	449.741	1378.22	1.29871	0.143493	5.41982	0.656823	4.76299	ARL6IP1	chr16:18812766:-	chr16_18801411_-;chr16_18801493_-
chr15:89807765-89807882:mpeak_69024|chr15_89787193_89859627_FANCI_NM_+|	157.348	1.53244	0.748913	-2.04622	0.0407348	0.212074	12.3295	12.0572	9.58085	2.3041	6.31955	2.10495	372.968	251.861	358.963	269.58	266.474	323.636	3.45272	1.24796	1.66269	0.194535	1.46816	FANCI	chr15:89807878:+	chr15_89264650_+
chr14:69555916-69555974:mpeak_59874|chr14_69522328_69619914_DCAF5_NM_-|	198.106	2.41174	1.03759	-2.32437	0.0201057	0.147947	4.62357	5.35875	8.94213	2.3041	2.10652	0	362.18	342.96	517.366	320.27	301.232	509.925	1.548	0.584742	2.1012	0.111698	1.9895	DCAF5	chr14:69555921:-	-
chr14:39630449-39630566:mpeak_57059|chr14_39619585_39639634_TRAPPC6B_NM_-|	129.241	1.89966	0.810778	-2.34302	0.0191286	0.1451	12.3295	9.37781	10.8583	4.6082	1.05326	1.57871	342.144	255.88	258.683	256.907	223.291	174.185	3.80125	1.10641	2.16925	0.388667	1.78059	TRAPPC6B	chr14:39630454:-	-
chr13:27648904-27649047:mpeak_51382|chr13_27643521_27746033_USP12_NM_-|	164.009	1.94702	0.864765	-2.25151	0.0243535	0.16173	10.7883	4.01906	21.7166	3.45615	4.21303	3.15743	331.356	385.83	214.611	395.153	278.06	315.743	3.91974	1.09475	1.75426	-0.0858919	1.84015	USP12	chr13:27648908:-;chr13:27648935:-;chr13:27648995:-	chr13_27074772_-;chr13_27074860_-
chr13:100199648-100199701:mpeak_54978|chr13_100153627_100214944_TM9SF2_NM_+|	296.275	2.83297	1.25316	-2.26066	0.0237803	0.160169	6.16476	8.03812	6.38724	0	3.15978	0	482.392	372.433	991.299	415.89	333.883	935.651	1.11532	0.56243	2.70406	0.131388	2.57267	TM9SF2	chr13:100199703:+	chr13_99547446_+
chr12:95889787-95889887:mpeak_46827|chr12_95867821_95907427_METAP2_NM_+|	192.772	4.1117	1.49416	-2.75185	0.00592598	0.0898151	7.70595	0	8.30341	1.15205	0	0	391.462	243.823	536.528	311.054	260.155	553.076	2.04931	0.307409	3.79664	0.0597348	3.7369	METAP2	chr12:95889889:+	chr12_95496111_+
chr12:6440196-6440324:mpeak_39056|chr12_6438788_6451283_TNFRSF1A_NM_-|	216.323	1.79292	0.661877	-2.70884	0.00675184	0.0949603	10.7883	9.37781	5.74851	8.06436	4.21303	7.36733	217.308	242.483	208.224	578.33	648.807	655.166	3.87935	1.04365	0.399626	-1.49455	1.89417	TNFRSF1A	chr12:6440250:-	chr12_6331000_-;chr12_6331086_-
chr12:56575026-56575098:mpeak_43671|chr12_56557549_56583351_SMARCC2_NM_-|	334.732	2.02566	1.0064	-2.01278	0.0441374	0.221384	3.08238	5.35875	5.74851	3.45615	1.05326	0	648.841	667.164	739.003	508.054	676.192	758.835	0.690491	0.348113	1.65383	0.0807975	1.57303	SMARCC2	chr12:56575044:-	chr12_56181244_-
chr12:56574451-56574629:mpeak_43669|chr12_56557549_56583351_SMARCC2_NM_-|	341.053	1.59562	0.784682	-2.03346	0.0420061	0.215267	36.9886	22.7747	14.0519	2.3041	5.26629	13.156	648.841	667.164	739.003	508.054	676.192	758.835	3.59196	1.06667	1.83245	0.0807975	1.75165	SMARCC2	chr12:56574481:-;chr12:56574578:-	chr12_56180696_-;chr12_56180790_-
chr12:56119590-56119698:mpeak_43430|chr12_56119410_56123457_CD63_NM_-|	4637.85	5.13463	1.38245	-3.71416	0.000203878	0.028886	6.16476	6.69843	6.38724	0	0	0	7752.19	8245.77	13802.8	8401.91	6592.35	10840	0.0645971	#DIV/0!	Inf	0.206066	Inf	CD63	chr12:56119620:-	-
chr12:133087416-133087471:mpeak_50293|chr12_133067156_133159556_FBRSL1_NM_+|	76.0777	5.35965	1.47159	-3.64208	0.000270444	0.0319235	6.16476	1.33969	9.58085	0	0	0	120.213	95.1177	217.166	160.135	137.977	165.239	3.95039	#DIV/0!	Inf	-0.0994158	Inf	FBRSL1	chr12:133087467:+	chr12_132510880_+
chr12:102302149-102302201:mpeak_47376|chr12_102271104_102314993_DRAM1_NM_+|	258.79	2.61551	1.04869	-2.49407	0.0126287	0.122344	7.70595	6.69843	5.10979	0	3.15978	0	577.946	581.424	534.612	483.861	484.499	420.464	1.15197	0.682543	2.62663	0.286554	2.34007	DRAM1	chr12:102302202:+	chr12_101908421_+
chr11:65154804-65154855:mpeak_33677|chr11_65154040_65178712_FRMD8_NM_+|	223.889	2.73821	1.06512	-2.57081	0.010146	0.112314	13.8707	1.33969	10.8583	3.45615	2.10652	1.57871	194.19	361.715	420.28	425.107	324.404	927.758	2.67047	0.425775	1.86804	-0.780886	2.64893	FRMD8	chr11:65154857:+	chr11_65387389_+
chr11:60682410-60682626:mpeak_32936|chr11_60681370_60689245_TMEM109_NM_+|	551.206	5.38653	1.56977	-3.43142	0.000600432	0.0402819	4.62357	9.37781	3.19362	0	0	0	685.83	521.138	1794.17	923.945	648.807	2023.39	0.572948	#DIV/0!	Inf	-0.260936	Inf	TMEM109	chr11:60682572:+	chr11_60914988_+
chr10:3176663-3176775:mpeak_20017|chr10_3109711_3178641_PFKP_NM_+|	1006.06	1.88032	0.91072	-2.06465	0.0389559	0.207162	12.3295	5.35875	8.94213	1.15205	2.10652	1.05248	3291.98	1961.3	2417.57	1614.02	1351.33	1405.58	0.347163	0.0986298	2.62696	0.811445	1.81552	PFKP	chr10:3176747:+;chr10:3176775:+	chr10_3134521_+;chr10_3134556_+;chr10_3134580_+
chr10:1046890-1046962:mpeak_19936|chr10_1034348_1063014_GTPBP4_NM_+|	609.211	1.8384	0.821445	-2.23801	0.0252207	0.164564	23.1178	9.37781	15.9681	9.21641	3.15978	3.15743	1738.46	856.06	872.496	1611.72	1014.29	1153.51	1.39785	0.410994	1.64151	-0.124508	1.76602	GTPBP4	chr10:1046953:+	-
chr10:104379168-104379223:mpeak_27497|chr10_104263718_104389822_SUFU_NM_+|	63.1932	3.06627	1.25541	-2.44245	0.0145879	0.129976	7.70595	2.67937	5.74851	1.15205	1.05326	0	152.578	135.308	107.944	145.158	96.8998	102.09	4.07595	0.961203	2.87104	0.201852	2.66918	SUFU	chr10:104379225:+	chr10_102619465_+
chr1:892517-892656:mpeak_69|chr1_880180_894679_NOC2L_NM_-|	73.7136	2.82706	1.42022	-1.99058	0.0465273	0.22735	6.16476	5.35875	8.30341	2.3041	0	0	175.696	88.4193	270.819	99.0764	46.3434	182.078	3.70642	2.11064	3.10518	0.707874	2.39731	NOC2L	chr1:892478:-	chr1_957169_-
chr1:46650840-46650898:mpeak_4568|chr1_46640748_46651157_TSPAN1_NM_+|	193.559	3.5044	1.35263	-2.5908	0.00957537	0.109907	3.08238	9.37781	5.74851	1.15205	0	0	619.558	439.417	404.312	309.902	311.765	218.389	1.24437	0.41142	3.98235	0.800658	3.18169	TSPAN1	chr1:46650895:+	chr1_46185221_+
chr1:43141655-43141718:mpeak_4055|chr1_43124047_43142254_PPIH_NM_+|	176.418	2.37169	1.06094	-2.23547	0.0253866	0.165	13.8707	8.03812	17.2455	5.76025	2.10652	0	280.497	277.315	550.58	274.188	201.172	486.244	3.53254	1.22713	2.31533	0.204952	2.11038	PPIH	chr1:43141714:+	chr1_42676059_+
chr1:226561800-226561850:mpeak_18401|chr1_226549242_226595801_PARP1_NM_-|	86.8599	3.9114	1.6191	-2.41578	0.0157015	0.134202	1.54119	5.35875	7.02596	1.15205	0	0	101.719	76.3621	346.827	142.854	78.9944	280.485	2.65302	0.688019	3.59549	0.0634177	3.53208	PARP1	chr1:226561799:-	chr1_226374099_-
chr1:201969429-201969491:mpeak_16422|chr1_201951765_201974685_RNPEP_NM_+|	260.24	3.98891	1.419	-2.81108	0.00493759	0.0835311	12.3295	5.35875	5.74851	1.15205	0	0	474.686	436.738	963.834	296.077	339.149	587.808	1.24979	0.282588	4.3465	0.616624	3.72987	RNPEP	chr1:201969480:+	chr1_202000351_+
chr1:154933590-154933649:mpeak_12573|chr1_154932322_154934258_PYGO2_NM_-|	217.178	2.25495	0.958258	-2.35318	0.0186138	0.143419	6.16476	5.35875	5.10979	5.76025	2.10652	0	288.203	353.677	261.238	529.943	434.996	713.579	1.84176	0.70301	1.08023	-0.894202	1.97443	PYGO2	chr1:154933590:-	chr1_154961117_-
chr1:153617455-153617513:mpeak_12312|chr1_153606457_153617539_CHTOP_NM_+|	308.086	2.11929	1.06661	-1.98694	0.0469295	0.228561	9.24714	2.67937	6.38724	1.15205	7.37281	0	466.981	314.826	532.057	705.055	629.849	1021.43	1.39389	0.542678	1.10318	-0.842727	1.94591	CHTOP	chr1:153617508:+	chr1_153645032_+
chr9:113007070-113007127:mpeak_194208|chr9_113006499_113018920_TXN_NM_-|	493.558	3.49322	1.41128	-2.47522	0.0133153	0.124952	23.1178	9.37781	21.7166	1.15205	0	2.63119	536.334	281.334	2290.46	430.867	349.682	1976.02	1.74421	0.205867	3.84092	0.173172	3.66775	TXN	-	chr9_110244783_-;chr9_110244827_-
chr8:48710895-48710964:mpeak_181988|chr8_48686938_48872743_PRKDC_NM_-|	241.518	3.53561	1.13402	-3.11777	0.00182223	0.0586533	7.70595	14.7366	12.1357	2.3041	1.05326	0	431.533	308.128	795.211	372.112	377.067	576.231	2.25284	0.379961	3.36447	0.21168	3.15279	PRKDC	-	chr8_47798312_-
chr8:103379447-103379510:mpeak_185781|chr8_103266742_103424917_UBR5_NM_-|	128.691	3.32799	1.23944	-2.68508	0.00725126	0.0974286	12.3295	12.0572	1.91617	2.3041	2.10652	0	152.578	131.289	325.749	228.106	230.664	445.197	4.31466	0.731877	2.57617	-0.568369	3.14454	UBR5	-	chr8_102367220_-
chr5:67544329-67544393:mpeak_151037|chr5_67511583_67593239_PIK3R1_NM_+|	583.926	5.50717	1.48115	-3.71817	0.000200669	0.0285588	4.62357	0	8.94213	0	0	0	1094.24	1036.92	745.39	1663.56	1568.3	885.132	0.707394	#DIV/0!	Inf	-0.517251	Inf	PIK3R1	-	chr5_68248550_+
chr5:138163223-138163416:mpeak_155959|chr5_138089084_138269490_CTNNA1_NM_+|	341.697	3.11709	1.30415	-2.39014	0.016842	0.138296	33.9062	9.37781	8.94213	4.6082	1.05326	0	517.84	316.166	1387.31	390.545	404.451	1026.16	2.35114	0.466307	3.20552	0.286555	2.91897	CTNNA1	-	chr5_138827631_+
chr5:134074389-134074487:mpeak_155578|chr5_134074169_134086448_CAMLG_NM_+|	332.234	1.41968	0.621767	-2.2833	0.0224127	0.155308	23.1178	24.1144	15.9681	8.06436	7.37281	7.89357	690.453	543.913	705.79	615.195	515.043	829.877	3.25749	1.19027	1.4377	-0.0147668	1.45247	CAMLG	-	chr5_134738792_+
chr4:78830408-78830514:mpeak_141848|chr4_78783804_78873642_MRPL1_NM_+|	123.631	5.15356	1.37738	-3.74156	0.000182879	0.0271216	9.24714	5.35875	4.47107	0	0	0	311.32	188.896	256.128	258.059	207.492	242.596	2.52226	#DIV/0!	Inf	0.0949941	Inf	MRPL1	-	chr4_77909288_+;chr4_77909306_+
chr3:184041182-184041372:mpeak_136619|chr3_184032282_184052514_EIF4G1_NM_+|	759.778	1.95034	0.90371	-2.15815	0.0309164	0.182446	64.73	37.5112	53.0141	9.21641	27.3847	11.5772	792.172	842.663	2432.26	1088.69	1053.26	2704.86	3.81735	0.994022	1.68818	-0.253037	1.94122	EIF4G1	-	chr3_184323444_+;chr3_184323478_+;chr3_184323512_+
chr3:145806407-145806553:mpeak_133806|chr3_145788659_145879282_PLOD2_NM_-|	177.231	3.00203	1.32807	-2.26044	0.0237937	0.160191	9.24714	4.01906	8.94213	1.15205	2.10652	0	174.154	166.121	731.338	319.118	211.705	498.874	2.07242	0.474689	2.76879	0.057566	2.71122	PLOD2	-	chr3_146088712_-
chr3:13385557-13385616:mpeak_125108|chr3_13359281_13461819_NUP210_NM_-|	439.112	3.27595	1.25172	-2.61716	0.00886637	0.106218	10.7883	8.03812	6.38724	2.3041	1.05326	0	479.31	610.897	1470.34	599.066	558.227	1522.93	0.984698	0.187896	2.90881	-0.0659018	2.97471	NUP210	-	chr3_13344030_-
chr21:30435804-30435877:mpeak_119525|chr21_30428873_30446118_CCT8_NM_-|	292.643	2.12211	1.04337	-2.03391	0.041961	0.215105	43.1533	12.0572	19.8004	2.3041	1.05326	11.5772	477.769	393.868	873.135	482.709	349.682	844.612	4.29918	0.890553	2.32844	0.0571529	2.27129	CCT8	-	chr21_29063527_-
chr20:49557394-49557452:mpeak_117668|chr20_49551773_49575060_DPM1_NM_-|	170.458	3.22001	1.37697	-2.33847	0.0193629	0.145967	3.08238	6.69843	12.7745	1.15205	1.05326	0	305.156	249.182	655.33	231.562	161.149	418.359	1.86459	0.407852	3.35441	0.576712	2.7777	DPM1	-	chr20_50940899_-
chr20:49191026-49191138:mpeak_117533|chr20_49126857_49199228_PTPN1_NM_+|	408.463	2.44716	1.00023	-2.44659	0.0144216	0.129124	12.3295	9.37781	15.9681	4.6082	4.21303	1.05248	440.78	515.779	1166.95	645.148	540.322	1545.03	1.77421	0.361608	1.93196	-0.362719	2.29468	PTPN1	-	chr20_50574537_+;chr20_50574643_+
chr20:39750351-39750468:mpeak_116247|chr20_39657461_39751834_TOP1_NM_+|	797.7	1.58549	0.708907	-2.23653	0.0253173	0.164817	81.6831	37.5112	43.4332	20.7369	9.47933	13.156	1579.72	1618.34	2007.51	1036.85	1020.61	2103.37	3.12411	1.04239	1.90673	0.323186	1.58354	TOP1	-	chr20_41121778_+
chr2:27604998-27605104:mpeak_99281|chr2_27604672_27632550_PPM1G_NM_-|	735.204	1.72679	0.799264	-2.16047	0.0307361	0.182105	49.3181	16.0762	31.2975	10.3685	4.21303	10.5248	1416.35	1209.74	2005.59	1217.72	837.341	2013.91	2.08762	0.617017	1.94535	0.186872	1.75847	PPM1G	-	chr2_27382187_-
chr2:26332690-26332782:mpeak_99033|chr2_26256728_26357806_RAB10_NM_+|	340.003	3.51567	1.46133	-2.40581	0.0161368	0.135713	10.7883	5.35875	3.19362	2.3041	0	0	494.722	329.563	1110.74	502.294	353.895	1267.18	0.999506	0.325535	3.06936	-0.134004	3.20337	RAB10	-	chr2_26109860_+
chr2:217057356-217057409:mpeak_111985|chr2_216974019_217069910_XRCC5_NM_+|	842.307	2.25867	1.00783	-2.24113	0.0250176	0.163742	4.62357	6.69843	16.6068	2.3041	3.15978	1.05248	1414.81	1065.05	2652.62	1559.88	1140.68	2240.2	0.544158	0.13189	2.09962	0.0549263	2.04469	XRCC5	-	chr2_216192686_+
chr2:170492631-170492750:mpeak_108788|chr2_170440849_170492922_PPIG_NM_+|	960.961	2.49794	1.10711	-2.25627	0.0240535	0.160992	15.4119	13.3969	14.0519	2.3041	4.21303	0	2720.2	2636.5	1246.15	2456.17	1853.74	569.39	0.649124	0.200351	2.71734	0.436416	2.28093	PPIG	-	chr2_169636206_+;chr2_169636226_+
chr17:58543853-58543912:mpeak_84362|chr17_58525195_58603601_APPBP2_NM_-|	1512.4	5.10781	1.42785	-3.57728	0.000347192	0.0344065	10.7883	4.01906	3.19362	0	0	0	2686.29	2373.92	4064.2	2724.6	2256.08	4025.72	0.197284	#DIV/0!	Inf	0.0187816	Inf	APPBP2	-	chr17_60466446_-
chr17:58406505-58406564:mpeak_84291|chr17_58256789_58469586_USP32_NM_-|	494.13	4.58145	1.34235	-3.413	0.00064251	0.041194	1.54119	6.69843	7.66468	1.15205	0	0	813.748	710.034	1064.11	1170.48	1023.77	1130.36	0.614565	0.103957	3.78714	-0.361406	4.14855	USP32	-	chr17_60329151_-
chr17:36894803-36894853:mpeak_81389|chr17_36891853_36904558_PCGF2_NM_-|	312.339	2.23598	1.05704	-2.11532	0.0344024	0.192981	6.16476	5.35875	6.38724	3.45615	0	0	756.724	807.831	680.879	451.604	457.114	572.547	0.797651	0.699973	2.37359	0.600165	1.77342	PCGF2	-	chr17_38738593_-
chr16:85015574-85015639:mpeak_76722|chr16_85010125_85045141_ZDHHC7_NM_-|	342.045	2.31551	1.09546	-2.11374	0.0345379	0.19356	3.08238	10.7175	7.66468	0	9.47933	0.526238	377.592	422.001	507.147	784.547	663.553	1318.23	1.6426	0.542537	1.10115	-1.082	2.18315	ZDHHC7	-	chr16_84981983_-
chr16:68842380-68842478:mpeak_74933|chr16_68771194_68867192_CDH1_NM_+|	1728.38	2.15588	1.06072	-2.03247	0.0421059	0.21553	24.659	16.0762	14.6906	9.21641	6.31955	3.68367	1180.55	1272.7	5769.59	2733.82	2315.06	7394.17	0.674048	0.154461	1.52798	-0.597631	2.12561	CDH1	-	chr16_68808552_+
chr15:89835910-89836096:mpeak_69032|chr15_89787193_89859627_FANCI_NM_+|	156.852	2.10787	0.814215	-2.58884	0.00963002	0.110295	15.4119	6.69843	10.2196	1.15205	3.15978	2.10495	372.968	251.861	358.963	269.58	266.474	323.636	3.28626	0.746406	2.33295	0.194535	2.13841	FANCI	-	chr15_89292754_+
chr15:64418265-64418315:mpeak_66484|chr15_64388082_64429766_SNX1_NM_+|	250.953	1.99179	0.974061	-2.04483	0.0408715	0.212333	6.16476	5.35875	5.74851	0	2.10652	2.10495	426.91	336.261	672.576	443.54	411.824	698.844	1.203	0.406458	2.03604	-0.114378	2.15042	SNX1	-	chr15_64126098_+
chr15:52856380-52856442:mpeak_65566|chr15_52844301_52861643_ARPP19_NM_-|	372.121	3.13471	1.26036	-2.48716	0.0128766	0.123473	16.9531	4.01906	16.6068	1.15205	4.21303	0	547.122	333.582	1240.4	564.505	418.144	1318.75	1.77167	0.349684	2.80825	-0.117696	2.92595	ARPP19	-	chr15_52564232_-
chr14:35497283-35497355:mpeak_56697|chr14_35452103_35498266_SRP54_NM_+|	179.118	2.31821	1.14191	-2.03012	0.0423445	0.216233	15.4119	2.67937	8.30341	3.45615	1.05326	0	496.263	279.995	475.849	262.668	187.48	416.254	2.10802	0.780713	2.54924	0.531249	2.01799	SRP54	-	chr14_35028127_+
chr12:863389-863497:mpeak_38605|chr12_862088_1017640_WNK1_NM_+|	497.385	2.60303	0.75653	-3.44075	0.000580114	0.0399372	32.365	20.0953	19.8004	3.45615	5.26629	1.57871	1197.5	802.472	1265.95	815.652	727.802	1076.68	2.21256	0.393154	2.8104	0.31785	2.49255	WNK1	-	chr12_754321_+
chr12:56705097-56705201:mpeak_43726|chr12_56704379_56710128_CNPY2_NM_-|	307.191	3.94223	1.51815	-2.59674	0.0094114	0.108971	15.4119	4.01906	1.91617	1.15205	0	0	564.076	514.44	1042.4	465.429	321.244	756.204	1.00651	0.224007	4.21177	0.459062	3.7527	CNPY2	-	chr12_56311403_-
chr12:14956283-14956396:mpeak_39983|chr12_14940432_14956401_WBP11_NM_-|	169.929	3.39858	1.53334	-2.21645	0.0266605	0.169056	24.659	1.33969	2.55489	2.3041	1.05326	0	302.073	142.007	517.366	249.995	173.788	622.013	2.96986	0.481551	3.08827	-0.121324	3.2096	WBP11	-	chr12_14803412_-
chr12:122262340-122262398:mpeak_49485|chr12_122242637_122267971_SETD1B_NM_+|	226.058	2.78253	0.842363	-3.30324	0.000955751	0.0473525	16.9531	9.37781	15.3294	1.15205	3.15978	6.31486	201.896	310.807	391.538	435.475	483.446	837.245	4.60721	0.605107	1.97098	-0.95765	2.92863	SETD1B	-	chr12_121824505_+
chr10:71151996-71152071:mpeak_24485|chr10_71029755_71160746_HK1_NM_+|	537.777	1.90148	0.947252	-2.00736	0.0447111	0.222597	21.5767	6.69843	10.2196	2.3041	6.31955	0	1163.6	1235.19	1292.14	844.453	781.518	1089.31	1.04295	0.476395	2.15829	0.44288	1.71541	HK1	-	chr10_69392286_+
chr1:46580979-46581036:mpeak_4554|chr1_46509543_46642167_PIK3R3_NM_-|	371.784	3.65737	1.26477	-2.89173	0.00383129	0.0753682	7.70595	9.37781	3.83234	1.15205	1.05326	0	830.701	869.457	438.803	896.296	812.062	590.965	0.977862	0.143867	3.24556	-0.104299	3.34986	PIK3R3	-	chr1_46115259_-
chr1:39317284-39317345:mpeak_3571|chr1_39305376_39325495_RRAGC_NM_-|	170.459	2.19078	0.921503	-2.37739	0.0174355	0.139943	10.7883	13.3969	8.30341	1.15205	4.21303	0	405.333	447.455	383.873	297.229	207.492	266.276	2.62712	1.04379	2.59826	0.681652	1.91661	RRAGC	-	chr1_38851623_-
chr1:29309100-29309150:mpeak_2634|chr1_29213602_29443330_EPB41_NM_+|	98.6968	3.48752	1.3503	-2.58277	0.00980106	0.111042	3.08238	4.01906	7.66468	1.15205	0	0	285.12	204.972	221.637	144.006	165.362	147.347	2.07468	0.756742	3.68001	0.640036	3.03998	EPB41	-	chr1_28982638_+
chr1:245026911-245027029:mpeak_19520|chr1_245017805_245027827_HNRNPU_NM_-mpeak_19520|chr1_245017805_245027827_HNRNPU_NM_-||	1025.23	2.49869	1.0713	-2.33238	0.0196807	0.146744	9.24714	5.35875	9.58085	0	4.21303	1.57871	1174.39	990.028	3115.05	1997.66	1489.31	3506.32	0.458128	0.124228	2.06215	-0.405578	2.46772	HNRNPU	-	chr1_244863640_-;chr1_244863672_-
chr1:183599668-183599779:mpeak_15394|chr1_183596729_183605076_ARPC5_NM_-|	545.541	1.90759	0.954733	-1.99804	0.0457124	0.225241	7.70595	8.03812	15.3294	2.3041	2.10652	2.10495	1325.42	810.51	1582.12	685.47	576.133	1529.25	0.835745	0.233462	2.25372	0.413842	1.83988	ARPC5	-	chr1_183630545_-;chr1_183630624_-
chr1:1756768-1756956:mpeak_248|chr1_1718492_1822556_GNB1_NM_-|	698.336	2.16475	1.10295	-1.96269	0.0496818	0.236288	35.4474	20.0953	12.7745	9.21641	2.10652	0	1504.2	1066.39	2398.41	989.612	736.228	1605.55	1.37487	0.509829	2.593	0.57683	2.01617	GNB1	-	chr1_1825330_-
chr1:150550678-150550930:mpeak_11766|chr1_150549967_150552214_MCL1_NM_-|	249.455	2.81507	0.899747	-3.12873	0.00175561	0.0581972	10.7883	4.01906	10.8583	4.6082	4.21303	0.526238	331.356	344.299	256.767	708.511	462.381	855.137	2.75258	0.461369	1.45719	-1.1196	2.57679	MCL1	-	chr1_150578285_-
chr1:117147897-117147967:mpeak_9614|chr1_117120184_117210377_IGSF3_NM_-|	556.014	2.24427	1.09444	-2.05061	0.0403051	0.211048	4.62357	10.7175	5.74851	0	4.21303	0	1137.4	885.533	1678.57	839.845	766.772	1338.75	0.569758	0.429118	2.3236	0.329661	1.99394	IGSF3	-	chr1_116605281_-;chr1_116605338_-
chr1:114005871-114005941:mpeak_8958|chr1_113933474_114224833_MAGI3_NM_+|	129.835	1.79345	0.830616	-2.15918	0.0308358	0.182349	10.7883	9.37781	8.30341	1.15205	7.37281	1.57871	266.626	257.22	178.843	314.51	290.699	211.548	4.05152	1.23704	1.49455	-0.217022	1.71158	MAGI3	-	chr1_113463298_+
chrX:76929447-76929508:mpeak_200148|chrX_76764107_77041755_ATRX_NM_-|	166.117	-1.93114	0.767639	2.51569	0.01188	0.119368	1.54119	4.01906	10.2196	21.889	25.2782	19.997	349.85	395.208	223.553	336.399	372.854	232.597	1.62912	7.1311	-2.08961	0.0404205	-2.13003	ATRX	chrX:76929451:-	chrX_77673906_-;chrX_77673955_-;chrX_77673990_-
chrX:23725943-23726053:mpeak_198167|chrX_23722099_23761407_ACOT9_NM_-|	62.4302	-1.74072	0.82616	2.10701	0.0351171	0.195562	9.24714	5.35875	8.94213	13.8246	7.37281	28.4169	149.495	89.759	171.178	94.4682	97.9531	73.1471	5.73737	18.6823	-1.07515	0.628061	-1.70321	ACOT9	chrX:23725948:-	chrX_23707838_-
chrX:153632685-153632752:mpeak_201971|chrX_153631182_153640428_DNASE1L1_NM_-|	49.0614	-3.25041	1.62649	1.99842	0.045671	0.225211	0	2.67937	0	0	0	9.99852	124.836	120.572	130.938	81.7956	52.6629	65.2535	2.13583	15.0194	-1.89982	0.91414	-2.81396	DNASE1L1	chrX:153632683:-	-
chrX:14881098-14881229:mpeak_197758|chrX_14862103_14891184_FANCB_NM_-|	11.5676	-4.99869	1.86466	2.68075	0.00734567	NA	0	0	0	4.6082	0	9.99852	38.5297	22.7747	8.30341	28.8013	13.6924	12.1035	#DIV/0!	40.1305	-Inf	0.350425	-Inf	FANCB	chrX:14881102:-;chrX:14881175:-	chrX_14862981_-;chrX_14863040_-
chrX:11786040-11786102:mpeak_197675|chrX_11776277_11793098_MSL3_NM_+|	20.2248	-2.19339	0.970322	2.26048	0.0237914	NA	7.70595	12.0572	8.30341	19.5849	11.5858	40.5203	36.9886	16.0762	37.6847	25.3451	9.47933	17.3659	30.9275	137.365	-1.35294	0.798108	-2.15105	MSL3	chrX:11786096:+	chrX_11767923_+;chrX_11767938_+;chrX_11767977_+
chr9:98638674-98638745:mpeak_193040|chr9_98637899_98774506_ERCC6L2_NM_+|	36.7089	-4.51818	1.84912	2.44342	0.0145486	0.129699	0	0	0	0	0	12.1035	92.4714	85.7399	40.2396	78.3395	71.6216	59.9911	#DIV/0!	17.2946	-Inf	0.0572484	-Inf	ERCC6L2	chr9:98638677:+;chr9:98638747:+	-
chr9:139704424-139704528:mpeak_197087|chr9_139702373_139734773_RABL6_NM_+|	76.9175	-1.93132	0.784717	2.46116	0.0138487	0.127507	4.62357	5.35875	11.497	19.5849	9.47933	24.207	175.696	128.61	220.998	88.7079	96.8998	137.348	4.08894	16.4949	-1.3104	0.701815	-2.01222	RABL6	chr9:139704478:+;chr9:139704506:+;chr9:139704568:+	chr9_136810043_+;chr9_136810115_+
chr9:139695147-139695202:mpeak_197080|chr9_139690789_139702023_CCDC183_NM_+|	9.70441	-4.53415	1.60396	2.82684	0.00470097	NA	10.7883	8.03812	24.2715	10.3685	25.2782	18.4183	7.70595	6.69843	3.83234	0	1.05326	0	236.325	1711.04	-0.327076	4.11391	-4.44099	CCDC183	chr9:139695201:+	chr9_136800748_+
chr9:139691661-139691718:mpeak_197079|chr9_139690789_139702023_CCDC183_NM_+|	5.09993	-4.8148	2.04249	2.35732	0.0184074	NA	12.3295	1.33969	3.83234	2.3041	2.10652	19.997	7.70595	6.69843	3.83234	0	1.05326	0	95.9687	772.449	-0.479852	4.11391	-4.59377	CCDC183	chr9:139691712:+	chr9_136797203_+;chr9_136797259_+
chr9:117265774-117265905:mpeak_194748|chr9_117165216_117267736_DFNB31_NM_-|	54.3269	-4.47281	1.39089	3.21579	0.00130086	0.0528609	0	1.33969	0.638724	5.76025	2.10652	4.73614	146.413	251.861	99.0022	36.8656	76.8879	26.3119	0.596774	8.99788	-2.67134	1.82795	-4.49929	DFNB31	chr9:117265830:-	chr9_114503493_-;chr9_114503551_-
chr9:117240597-117240654:mpeak_194739|chr9_117165216_117267736_DFNB31_NM_-|	58.6009	-2.16196	0.859953	2.51405	0.0119354	0.119622	9.24714	8.03812	11.497	14.9767	11.5858	10.5248	146.413	251.861	99.0022	36.8656	76.8879	26.3119	5.78799	26.4785	-0.365743	1.82795	-2.19369	DFNB31	chr9:117240600:-	chr9_114478321_-
chr9:117225949-117226070:mpeak_194733|chr9_117165216_117267736_DFNB31_NM_-|	54.3853	-3.03643	1.26455	2.40119	0.0163418	0.136269	0	0	3.83234	4.6082	1.05326	5.78862	146.413	251.861	99.0022	36.8656	76.8879	26.3119	2.312	8.17481	-1.57906	1.82795	-3.40701	DFNB31	chr9:117225962:-	chr9_114463668_-
chr8:99591602-99591662:mpeak_185063|chr8_99468228_99954799_STK3_NM_-|	65.4466	-1.66262	0.821832	2.02307	0.0430664	0.218303	13.8707	2.67937	3.83234	11.5205	11.5858	18.4183	141.789	99.1368	182.036	96.7723	85.314	118.404	4.81897	13.819	-1.02664	0.493214	-1.51986	STK3	chr8:99591606:-	chr8_98579379_-
chr8:80870187-80870275:mpeak_183482|chr8_80831383_80942506_MRPS28_NM_-|	41.4478	-4.8893	1.66979	2.92809	0.00341054	0.0726933	1.54119	0	0	1.15205	3.15978	25.7857	81.6831	53.5875	110.499	72.5792	53.7162	93.6704	1.88126	13.6828	-4.28753	0.160028	-4.44755	MRPS28	chr8:80870219:-	chr8_79957985_-
chr8:74461816-74461898:mpeak_183232|chr8_74333700_74659943_STAU2_NM_-|	34.7417	-1.8122	0.782334	2.31639	0.0205367	0.149533	12.3295	10.7175	19.1617	21.889	20.0119	11.051	97.095	80.3812	61.9562	26.4972	38.9706	16.8396	17.6287	64.3343	-0.327141	1.54052	-1.86767	STAU2	chr8:74461836:-	chr8_73549586_-;chr8_73549618_-
chr8:53567830-53567881:mpeak_182143|chr8_53536419_53627026_RB1CC1_NM_-|	24.848	-4.39708	1.68478	2.60988	0.0090573	0.107085	0	0	0	0	1.05326	8.94605	72.4359	38.8509	41.517	43.7779	40.0238	51.5713	#DIV/0!	11.0797	-Inf	0.17474	-Inf	RB1CC1	chr8:53567831:-	chr8_52655271_-
chr8:52772871-52773116:mpeak_182106|chr8_52733278_52811746_PCMTD1_NM_-|	95.7243	-1.89484	0.773109	2.45093	0.0142486	0.128688	6.16476	21.435	8.30341	17.2808	32.651	15.7871	255.838	245.163	198.643	127.878	144.296	75.252	5.13164	18.9159	-0.872198	1.00991	-1.88211	PCMTD1	chr8:52773062:-	-
chr8:42386620-42386768:mpeak_181743|chr8_42275485_42397356_SLC20A2_NM_-|	20.7336	-3.73153	1.24455	2.99831	0.00271485	NA	0	2.67937	0.638724	5.76025	10.5326	18.9446	36.9886	25.454	49.8204	25.3451	25.2782	47.3614	4.43347	35.9621	-3.40868	0.196254	-3.60493	SLC20A2	chr8:42386621:-;chr8:42386675:-;chr8:42386717:-	chr8_42531479_-;chr8_42531575_-
chr8:18513035-18513085:mpeak_180434|chr8_18393468_18871196_PSD3_NM_-|	35.6724	-3.80665	1.78595	2.13144	0.033053	0.189043	0	0	0	0	0	8.94605	50.8593	65.6446	73.4532	44.93	70.5683	113.667	#DIV/0!	11.7112	-Inf	-0.270718	-Inf	PSD3	chr8:18513034:-	chr8_18655525_-
chr8:17529417-17529474:mpeak_180352|chr8_17503648_17658426_MTUS1_NM_-|	43.6517	-2.84646	1.34569	2.11525	0.0344087	0.192981	0	2.67937	0	5.76025	4.21303	6.31486	120.213	62.9653	61.3175	125.574	89.527	45.2565	3.28763	6.25608	-2.60385	-0.090683	-2.51317	MTUS1	chr8:17529419:-	-
chr8:146216813-146216863:mpeak_189013|chr8_146203939_146228285_ZNF252P_NR_-|	56.5405	-4.00345	1.71389	2.33589	0.0194968	0.146303	0	0	0	0	0	8.94605	135.625	76.3621	111.777	133.638	87.4205	124.718	#DIV/0!	7.7617	-Inf	-0.0949007	-Inf	ZNF252P	chr8:146216801:-	-
chr8:146068921-146069075:mpeak_188975|chr8_146052902_146071363_ZNF7_NM_+|	6.80614	-3.09389	1.48409	2.08471	0.0370958	NA	4.62357	5.35875	3.83234	6.9123	9.47933	24.207	9.24714	2.67937	7.66468	3.45615	4.21303	0	70.5146	352.915	-1.55523	1.35306	-2.90829	ZNF7	chr8:146069075:+	chr8_144843686_+
chr8:145689197-145689350:mpeak_188886|chr8_145676153_145691031_CYHR1_NM_-|	175.611	-1.18659	0.580489	2.04412	0.0409418	0.212557	320.568	234.445	215.25	305.293	259.102	195.761	158.743	123.251	119.441	69.123	70.5683	35.7842	191.877	433.197	0.0190553	1.1939	-1.17484	CYHR1	chr8:145689208:-;chr8:145689251:-;chr8:145689295:-	chr8_144463821_-;chr8_144463897_-
chr8:11668392-11668615:mpeak_180111|chr8_11653081_11695896_FDFT1_NM_+|	297.192	-1.81895	0.689052	2.63978	0.00829588	0.10329	7.70595	12.0572	8.94213	28.8013	32.651	35.7842	556.37	396.547	795.85	517.271	394.972	779.359	1.64146	5.74819	-1.76018	0.0479479	-1.80813	FDFT1	chr8:11668467:+	-
chr7:97601174-97601224:mpeak_175296|chr7_97596289_97601638_MGC72080_NR_-|	54.2516	-2.51234	1.25497	2.0019	0.045295	0.224298	3.08238	0	0.638724	3.45615	0	6.31486	149.495	87.0796	162.875	93.3161	62.1423	82.6194	1.39734	6.15619	-1.39278	0.746581	-2.13936	MGC72080	chr7:97601221:-	chr7_97971910_-
chr7:86974099-86974151:mpeak_174683|chr7_86954760_86974808_TP53TG1_NR_-|	41.2324	-3.99067	1.7676	2.25768	0.0239658	0.160736	0	0	1.27745	0	0	14.2084	104.801	79.0415	129.661	42.6259	45.2901	77.8832	1.22242	25.709	-3.47541	0.919043	-4.39445	TP53TG1	chr7:86974092:-	chr7_87344794_-
chr7:80385351-80385803:mpeak_174450|chr7_80374623_80548667_SEMA3C_NM_-|	552.132	-2.08837	1.01548	2.05652	0.0397323	0.209466	49.3181	103.156	13.4132	239.627	309.658	63.6748	1066.5	622.954	1429.46	850.213	682.512	1195.09	5.31873	22.4707	-1.88559	0.193303	-2.07889	SEMA3C	chr7:80385641:-	-
chr7:76209010-76209169:mpeak_174240|chr7_76178657_76255237_LOC100133091_NR_+|	8.84866	-2.85772	1.39403	2.04997	0.0403672	NA	0	5.35875	3.83234	6.9123	18.9587	37.3629	6.16476	9.37781	2.55489	4.6082	3.15978	7.89357	76.1799	403.752	-2.78239	0.20856	-2.99095	LOC100133091	chr7:76209062:+	chr7_76579836_+
chr7:65553418-65553493:mpeak_173436|chr7_65540775_65557754_ASL_NM_+|	26.6354	-2.22876	1.06074	2.10114	0.035629	0.197168	1.54119	2.67937	3.19362	2.3041	6.31955	5.26238	49.3181	57.6065	108.583	26.4972	15.7989	40.5203	3.44033	16.7673	-0.905275	1.37975	-2.28503	ASL	chr7:65553498:+	chr7_66088520_+
chr7:55435941-55436216:mpeak_173023|chr7_55433140_55498918_LANCL2_NM_+|	49.8671	-2.01585	0.81351	2.47796	0.0132135	0.12466	13.8707	13.3969	4.47107	21.889	25.2782	14.7347	109.424	71.0034	155.21	50.6902	44.2369	74.1996	9.45622	36.6009	-0.963742	0.988801	-1.95254	LANCL2	chr7:55436235:+	-
chr7:44647240-44647300:mpeak_172685|chr7_44646120_44747477_OGDH_NM_+|	210.422	-2.49673	0.911207	2.74002	0.00614355	0.0909835	0	8.03812	5.74851	23.041	9.47933	15.2609	470.063	332.242	756.887	207.369	254.889	442.04	1.32632	5.2838	-1.79317	0.785929	-2.5791	OGDH	chr7:44647297:+	chr7_44607697_+
chr7:23226693-23226867:mpeak_171403|chr7_23221445_23239786_NUPL2_NM_+|	9.17122	-4.14193	1.64179	2.52282	0.0116419	NA	0	0	0	1.15205	7.37281	9.99852	7.70595	14.7366	10.2196	17.2808	21.0652	20.5233	#DIV/0!	31.4653	-Inf	-0.849897	-Inf	NUPL2	chr7:23226777:+;chr7:23226867:+	chr7_23187153_+;chr7_23187204_+;chr7_23187246_+
chr7:157050386-157050526:mpeak_179599|chr7_156931654_157060278_UBE3C_NM_+|	188.183	-1.73479	0.844055	2.0553	0.0398496	0.209743	13.8707	6.69843	1.27745	17.2808	21.0652	14.7347	442.322	334.922	426.029	346.767	220.131	413.097	1.8156	5.41641	-1.28078	0.296116	-1.57689	UBE3C	chr7:157050531:+	chr7_157257832_+
chr7:151803158-151803218:mpeak_179181|chr7_151722758_151818630_GALNT11_NM_+|	34.7705	-4.23678	1.82136	2.32616	0.0200103	0.147611	0	1.33969	0	0	2.10652	14.7347	87.8478	25.454	109.222	39.1697	31.5978	105.774	1.80613	14.3093	-3.65203	0.333952	-3.98598	GALNT11	chr7:151803220:+	chr7_152106146_+
chr7:150908566-150908627:mpeak_179110|chr7_150905193_150924460_ABCF2_NM_-|	5.06014	-5.38606	2.36215	2.28015	0.0225988	NA	3.08238	2.67937	12.1357	5.76025	8.42607	18.4183	0	0	10.2196	0	0	0	58.3765	#DIV/0!	-0.86532	Inf	-Inf	ABCF2	chr7:150908570:-	chr7_151211485_-
chr7:130327068-130327177:mpeak_177630|chr7_130146647_130353598_COPG2_NM_-|	87.0433	-2.36952	0.906205	2.61478	0.00892858	0.106449	1.54119	4.01906	8.30341	5.76025	12.6391	24.7332	172.613	164.781	294.452	114.053	108.486	133.138	2.19415	12.1269	-1.63747	0.829006	-2.46648	COPG2	chr7:130327067:-;chr7:130327115:-;chr7:130327166:-	chr7_130642199_-;chr7_130642243_-;chr7_130642297_-
chr7:101901383-101901517:mpeak_175900|chr7_101459183_101926312_CUX1_NM_+|	124.833	-1.29442	0.498836	2.59488	0.00946246	0.109272	32.365	33.4922	29.3813	31.1054	38.9706	44.7302	294.367	255.88	307.865	149.767	156.936	123.14	11.0986	26.7089	-0.269584	0.99736	-1.26694	CUX1	chr7:101901513:+	chr7_102258231_+
chr7:100959460-100959510:mpeak_175832|chr7_100958563_100965104_IFT22_NM_-|	80.9069	-5.06147	1.71402	2.95299	0.00314713	0.0699248	0	0	0	0	0	10.5248	228.096	150.045	224.192	110.597	129.551	117.877	#DIV/0!	8.81902	-Inf	0.750501	-Inf	IFT22	chr7:100959438:-	chr7_101316157_-
chr6:83720618-83720668:mpeak_164438|chr6_83602761_83775560_UBE3D_NM_-|	10.5397	-3.84442	1.73409	2.21697	0.0266254	NA	0	0	0	1.15205	1.05326	7.36733	27.7414	16.0762	9.58085	16.1287	20.0119	27.3644	#DIV/0!	15.0738	-Inf	-0.250071	-Inf	UBE3D	chr6:83720653:-	chr6_83010937_-
chr6:80217741-80217807:mpeak_164194|chr6_80197583_80247147_LCA5_NM_-|	6.48579	-4.61468	2.03159	2.27146	0.023119	NA	1.54119	0	0	2.3041	0	15.2609	4.62357	20.0953	11.497	4.6082	9.47933	8.41981	12.7667	117.062	-3.51059	0.686227	-4.19681	LCA5	chr6:80217754:-	chr6_79508024_-
chr6:43321913-43321968:mpeak_162708|chr6_43308240_43337181_ZNF318_NM_-|	151.139	-3.39349	1.04245	3.25529	0.00113277	0.0502606	3.08238	1.33969	5.10979	19.5849	6.31955	48.4139	399.168	400.566	215.889	297.229	252.782	164.186	0.938523	10.4058	-2.96289	0.50797	-3.47086	ZNF318	chr6:43321892:-;chr6:43321917:-	chr6_43354180_-
chr6:41667604-41667654:mpeak_162434|chr6_41652816_41703997_TFEB_NM_-|	12.0041	-6.61273	1.88073	3.51605	0.000438014	NA	0	0	0	0	1.05326	7.89357	61.6476	30.8128	22.994	8.06436	8.42607	3.15743	#DIV/0!	68.3039	-Inf	2.55488	-Inf	TFEB	chr6:41667559:-	chr6_41699822_-
chr6:34976516-34976566:mpeak_161834|chr6_34857037_35056382_ANKS1A_NM_+|	28.5752	-4.44533	1.87767	2.36747	0.0179104	0.141153	0	0	0	0	0	9.47228	44.6945	44.2097	95.8085	27.6492	44.2369	76.8308	#DIV/0!	19.108	-Inf	0.312715	-Inf	ANKS1A	chr6:34976570:+	-
chr6:31598750-31598862:mpeak_161327|chr6_31588449_31605222_PRRC2A_NM_+|	68.8467	-2.74843	0.97832	2.80933	0.00496441	0.0837159	4.62357	4.01906	0	10.3685	21.0652	8.41981	167.99	105.835	149.461	104.837	140.083	109.458	3.06269	11.246	-2.20516	0.256346	-2.46151	PRRC2A	chr6:31598863:+	chr6_31631085_+
chr6:29714432-29714568:mpeak_160962|chr6_29694916_29716826_HLA-F-AS1_NR_-|	6.30066	-5.32205	2.00543	2.65382	0.00795871	NA	9.24714	1.33969	15.9681	10.3685	12.6391	11.5772	6.16476	0	8.30341	0	0	0	122.36	#DIV/0!	-0.381159	Inf	-Inf	HLA-F-AS1	chr6:29714435:-;chr6:29714513:-	chr6_29746660_-;chr6_29746722_-
chr6:26461590-26461742:mpeak_160605|chr6_26458131_26476349_BTN2A1_NM_+|	4.58958	-7.10892	2.09751	3.38922	0.000700907	NA	0	0	3.83234	2.3041	12.6391	5.78862	9.24714	6.69843	13.4132	1.15205	0	0	39.1604	599.853	-2.43555	4.67152	-7.10706	BTN2A1	chr6:26461642:+;chr6:26461732:+	chr6_26461412_+;chr6_26461505_+
chr6:20600797-20600847:mpeak_160206|chr6_20534687_21231078_CDKAL1_NM_+|	13.4547	-3.75806	1.63377	2.30023	0.0214352	NA	0	1.33969	0	1.15205	3.15978	10.5248	32.365	14.7366	26.1877	23.041	13.6924	35.2579	5.48384	20.6089	-3.46919	0.0257776	-3.49497	CDKAL1	chr6:20600848:+	chr6_20600616_+
chr6:13605913-13605973:mpeak_159658|chr6_13574760_13612021_SIRT5_NM_+|	43.8916	-1.79163	0.793541	2.25777	0.0239602	0.160736	9.24714	2.67937	3.83234	25.3451	12.6391	17.3659	67.8124	53.5875	97.7247	80.6436	74.7814	81.0407	7.19173	23.4072	-1.81242	-0.109879	-1.70254	SIRT5	chr6:13605971:+	chr6_13605736_+
chr6:133623319-133623369:mpeak_167232|chr6_133562494_133849862_EYA4_NM_+|	3.7134	-4.81166	2.07757	2.31601	0.0205579	NA	0	0	0	2.3041	0	7.36733	10.7883	6.69843	4.47107	3.45615	4.21303	5.26238	#DIV/0!	112.184	-Inf	0.763838	-Inf	EYA4	chr6:133623389:+	chr6_133302263_+
chr6:107363126-107363205:mpeak_165610|chr6_107349375_107372260_C6orf203_NM_+|	83.8639	-1.29647	0.633297	2.04718	0.0406404	0.211856	20.0355	14.7366	14.6906	27.6492	33.7043	61.0436	147.954	116.553	144.99	142.854	123.231	158.924	12.0789	28.7987	-1.30716	-0.0536413	-1.25352	C6orf203	chr6:107363187:+	chr6_107041981_+
chr6:107361506-107361558:mpeak_165609|chr6_107349375_107372260_C6orf203_NM_+|	72.1916	-2.11645	0.918411	2.30447	0.0211965	0.151342	1.54119	1.33969	2.55489	12.6726	3.15978	10.5248	147.954	116.553	144.99	142.854	123.231	158.924	1.32743	6.20153	-2.27763	-0.0536413	-2.22399	C6orf203	chr6:107361558:+	chr6_107040352_+
chr5:79772596-79772687:mpeak_152231|chr5_79703831_79773037_ZFYVE16_NM_+|	27.8617	-3.83956	1.86652	2.05706	0.03968	0.209259	0	0	0	1.15205	0	16.8396	29.2826	33.4922	35.7685	41.4738	56.876	119.456	#DIV/0!	12.3906	-Inf	-1.14421	-Inf	ZFYVE16	chr5:79772686:+	-
chr5:76737763-76737850:mpeak_151836|chr5_76729112_76788332_WDR41_NM_-|	81.4692	-1.93683	0.963122	2.01099	0.0443266	0.221682	4.62357	4.01906	1.91617	4.6082	5.26629	16.8396	180.319	123.251	231.218	112.901	107.432	185.236	1.97439	6.58682	-1.33916	0.39902	-1.73818	WDR41	chr5:76737767:-;chr5:76737799:-	chr5_77441941_-;chr5_77441975_-
chr5:76327391-76327441:mpeak_151782|chr5_76326209_76358876_AGGF1_NM_+|	112.132	-4.37171	1.81896	2.40341	0.0162428	0.135934	0	0	0	0	0	12.6297	306.697	221.048	103.473	281.1	227.504	193.129	#DIV/0!	5.39936	-Inf	-0.152784	-Inf	AGGF1	chr5:76327438:+	-
chr5:60648192-60648245:mpeak_150451|chr5_60628099_60839281_ZSWIM6_NM_+|	65.522	-5.1783	1.92086	2.69583	0.00702135	0.0962994	0	0	0.638724	0	0	21.0495	157.201	116.553	225.469	67.971	55.8227	141.558	0.38383	23.7981	-5.04245	0.91178	-5.95423	ZSWIM6	chr5:60648267:+	-
chr5:463588-463816:mpeak_147840|chr5_443333_466841_EXOC3_NM_+|	160.521	-1.64567	0.715059	2.30144	0.0213666	0.151989	9.24714	9.37781	3.19362	19.5849	22.1184	9.99852	349.85	350.998	325.749	307.598	264.368	254.173	2.12533	6.25825	-1.24466	0.313414	-1.55807	EXOC3	chr5:463733:+;chr5:463817:+	chr5_463616_+;chr5_463686_+
chr5:36977517-36977676:mpeak_149286|chr5_36876860_37063891_NIPBL_NM_+|	85.5068	-2.89404	1.07281	2.69761	0.0069839	0.0960346	0	2.67937	1.91617	12.6726	10.5326	42.6253	98.6362	108.515	129.022	176.264	169.575	273.644	2.05053	10.6267	-3.84045	-0.881859	-2.95859	NIPBL	chr5:36977682:+	chr5_36977563_+
chr5:179729308-179729360:mpeak_158762|chr5_179728608_179780315_GFPT2_NM_-|	4.74489	-5.02735	2.46271	2.04139	0.0412119	NA	0	0	0	2.3041	0	6.84109	7.70595	13.3969	10.8583	12.6726	3.15978	0	#DIV/0!	57.7628	-Inf	1.01344	-Inf	GFPT2	chr5:179729310:-	chr5_180302313_-
chr5:153798761-153798811:mpeak_157221|chr5_153772574_153825382_SAP30L-AS1_NR_-|	3.28729	-4.99377	2.42788	2.05684	0.0397017	NA	6.16476	4.01906	2.55489	0	4.21303	9.47228	0	5.35875	7.66468	0	0	0	65.2092	#DIV/0!	-0.103409	Inf	-Inf	SAP30L-AS1	chr5:153798729:-;chr5:153798754:-	chr5_154419197_-
chr5:138633389-138633662:mpeak_156058|chr5_138609440_138665033_MATR3_NM_+|	160.685	-1.51792	0.757575	2.00366	0.0451063	0.223923	24.659	34.8319	17.2455	41.4738	76.8879	58.9387	265.085	182.197	473.294	211.977	173.788	367.84	8.3357	23.527	-1.20821	0.288728	-1.49694	MATR3	chr5:138633508:+	-
chr5:112204039-112204093:mpeak_153998|chr5_112196884_112227299_SRP19_NM_+|	113.842	-1.92845	0.915958	2.10539	0.0352573	0.195896	9.24714	4.01906	13.4132	12.6726	6.31955	18.4183	394.545	344.299	215.889	193.545	95.8465	57.8862	2.79444	10.7725	-0.487715	1.45901	-1.94672	SRP19	chr5:112204092:+	chr5_112868393_+
chr5:1011290-1011340:mpeak_147897|chr5_1009076_1037919_NKD2_NM_+|	7.44832	-6.51337	2.03966	3.19336	0.00140628	NA	0	0	0	2.3041	3.15978	8.94605	16.9531	16.0762	25.5489	6.9123	9.47933	0	#DIV/0!	58.6068	-Inf	1.83741	-Inf	NKD2	chr5:1011344:+	chr5_1011225_+
chr4:8395262-8395345:mpeak_138716|chr4_8368807_8442452_ACOX3_NM_-|	57.1496	-1.86555	0.679221	2.74661	0.00602152	0.0905528	10.7883	4.01906	7.66468	23.041	16.8521	20.5233	100.177	117.892	127.745	63.3628	100.06	93.6704	6.4983	23.4999	-1.42681	0.427709	-1.85452	ACOX3	chr4:8395260:-	chr4_8393535_-
chr4:2344495-2344554:mpeak_138191|chr4_2272583_2420370_ZFYVE28_NM_-|	13.9155	-2.9569	1.40022	2.11173	0.0347093	NA	0	0	1.27745	5.76025	4.21303	12.1035	16.9531	13.3969	25.5489	34.5615	28.438	24.7332	6.85584	25.1637	-4.11119	-0.650295	-3.4609	ZFYVE28	chr4:2344495:-	chr4_2342769_-
chr4:144056-144106:mpeak_137795|chr4_124357_195420_ZNF718_NR_+mpeak_137795|chr4_124357_154698_ZNF718_NM_+||	3.75008	-3.73681	1.83776	2.03335	0.0420171	NA	0	0	0	2.3041	2.10652	5.78862	3.08238	5.35875	6.38724	5.76025	6.31955	7.89357	#DIV/0!	51.0642	-Inf	-0.429719	-Inf	ZNF718	chr4:144101:+	chr4_150322_+
chr4:113306939-113307065:mpeak_144185|chr4_113218498_113362358_ALPK1_NM_+|	11.533	-3.82659	1.5611	2.45122	0.0142372	NA	0	0	0	3.45615	4.21303	9.99852	9.24714	13.3969	15.3294	19.5849	28.438	34.7317	#DIV/0!	21.3495	-Inf	-1.12385	-Inf	ALPK1	chr4:113307071:+	chr4_112385833_+
chr4:100484313-100484363:mpeak_143108|chr4_100470513_100485214_TRMT10A_NM_-|	9.78925	-5.54054	2.16946	2.55388	0.0106531	NA	0	0	0	0	0	8.94605	44.6945	12.0572	23.6328	14.9767	10.5326	2.63119	#DIV/0!	95.3721	-Inf	1.51427	-Inf	TRMT10A	chr4:100484313:-	chr4_99563157_-
chr3:66020293-66020354:mpeak_129104|chr3_65342807_66024509_MAGI1_NM_-|	29.2797	-3.69586	1.46365	2.5251	0.0115666	0.118263	0	1.33969	0	6.9123	3.15978	14.7347	44.6945	33.4922	42.7945	42.6259	64.2488	97.354	3.32205	12.1466	-4.21077	-0.755403	-3.45536	MAGI1	chr3:66020292:-	chr3_66034627_-
chr3:62276181-62276231:mpeak_128658|chr3_62249817_62304622_PTPRG-AS1_NR_-|	13.6851	-4.56651	2.00412	2.27856	0.022693	NA	0	0	0	0	0	11.5772	32.365	28.1334	21.0779	18.4328	14.7456	37.8891	#DIV/0!	48.8714	-Inf	0.198958	-Inf	PTPRG-AS1	chr3:62276177:-	chr3_62290503_-
chr3:52144459-52144509:mpeak_128007|chr3_52110001_52188706_POC1A_NM_-|	102.059	-4.0184	1.73881	2.31101	0.0208323	0.150226	0	0	1.27745	0	0	17.3659	283.579	225.067	232.495	184.328	148.509	132.086	0.517086	11.2056	-3.76492	0.672756	-4.43767	POC1A	chr3:52144456:-	chr3_52110423_-
chr3:197020986-197021036:mpeak_137645|chr3_196771600_197026143_DLG1_NM_-|	33.554	-4.60096	1.91379	2.40411	0.016212	0.135888	0	0	0	0	0	14.7347	43.1533	49.5684	93.2536	58.7546	62.1423	81.0407	#DIV/0!	21.8899	-Inf	-0.118797	-Inf	DLG1	chr3:197020983:-	-
chr3:185821602-185821652:mpeak_136804|chr3_185766649_185826901_ETV5_NM_-|	23.9523	-3.6912	1.84177	2.00416	0.0450531	0.223799	0	0	0	0	2.10652	6.84109	20.0355	30.8128	72.8145	25.3451	24.2249	105.248	#DIV/0!	8.66918	-Inf	-0.324159	-Inf	ETV5	chr3:185821599:-	chr3_186103813_-
chr3:183171684-183171841:mpeak_136457|chr3_183165395_183172986_LINC00888_NR_+|	41.4103	-4.07364	1.74267	2.33758	0.0194088	0.146094	0	0	0	0	2.10652	7.89357	81.6831	32.1525	120.08	71.4271	38.9706	142.611	#DIV/0!	5.92871	-Inf	-0.113196	-Inf	LINC00888	chr3:183171735:+	-
chr3:155563421-155563471:mpeak_134578|chr3_155546166_155572248_SLC33A1_NM_-|	53.0575	-3.72251	1.47419	2.52513	0.0115657	0.118263	0	1.33969	0	0	4.21303	8.41981	101.719	87.0796	139.88	101.38	73.7281	118.93	1.22279	6.44449	-3.23721	0.160673	-3.39789	SLC33A1	chr3:155563419:-	chr3_155845632_-
chr3:130730592-130730642:mpeak_132541|chr3_130569368_130734995_ATP2C1_NM_+|	27.694	-5.21826	1.85356	2.81527	0.00487361	0.0829795	0	0	0	0	0	10.5248	60.1064	75.0225	76.6468	36.8656	20.0119	53.15	#DIV/0!	28.6967	-Inf	0.944672	-Inf	ATP2C1	chr3:130730638:+	chr3_131011793_+
chr22:50641284-50641359:mpeak_124157|chr22_50639407_50655633_SELO_NM_+|	23.0656	-2.92797	0.815515	3.59033	0.000330263	0.0336138	7.70595	10.7175	8.30341	33.4095	32.651	35.7842	29.2826	18.7556	50.4592	14.9767	12.6391	22.102	27.1346	204.846	-1.93001	0.986324	-2.91633	SELO	chr22:50641350:+	chr22_50202951_+
chr22:29147125-29147182:mpeak_122190|chr22_29138042_29153065_HSCB_NM_+|	78.358	-3.4747	1.11408	3.11891	0.00181523	0.0586438	0	0	1.91617	3.45615	7.37281	8.41981	161.825	168.801	235.05	137.094	104.273	112.089	1.01622	5.44588	-3.32847	0.678447	-4.00692	HSCB	chr22:29147142:+;chr22:29147176:+	chr22_28751187_+
chr22:24041505-24041558:mpeak_121816|chr22_23981129_24059610_GUSBP11_NR_-|	5.30819	-5.61377	2.2014	2.55009	0.0107695	NA	0	0	0	2.3041	3.15978	11.051	15.4119	8.03812	6.38724	5.76025	11.5858	0	#DIV/0!	63.472	-Inf	0.782504	-Inf	GUSBP11	chr22:24041505:-	-
chr22:18894301-18894401:mpeak_121371|chr22_18893735_18899052_DGCR6_NM_+|	33.351	-2.04217	0.926841	2.20336	0.0275693	0.171948	9.24714	1.33969	2.55489	5.76025	10.5326	13.156	69.3535	60.2859	92.6149	43.7779	31.5978	59.9911	5.91292	21.7548	-1.16405	0.715337	-1.87939	DGCR6	chr22:18894402:+	-
chr22:18381840-18382054:mpeak_121317|chr22_18273682_18507325_MICAL3_NM_-|	16.1693	-3.40081	1.45667	2.33464	0.0195623	NA	1.54119	0	0.638724	11.5205	3.15978	11.051	13.8707	18.7556	42.1558	27.6492	18.9587	44.7302	4.37253	28.1715	-3.56118	-0.288524	-3.27266	MICAL3	chr22:18381847:-;chr22:18381960:-;chr22:18382002:-	chr22_17899082_-;chr22_17899217_-
chr21:44121252-44121305:mpeak_120620|chr21_44073861_44195389_PDE9A_NM_+|	13.717	-5.63898	2.25119	2.50488	0.0122492	NA	1.54119	0	0	0	1.05326	23.6807	29.2826	17.4159	50.4592	1.15205	33.7043	6.31486	4.75883	90.1139	-4.00438	1.23869	-5.24307	PDE9A	chr21:44121303:+	chr21_42701207_+
chr21:38472487-38472716:mpeak_120123|chr21_38445570_38573740_TTC3_NM_+|	109.211	-2.02156	0.829255	2.43781	0.0147766	0.130815	9.24714	5.35875	8.94213	10.3685	12.6391	39.4679	260.461	265.258	207.585	177.416	195.906	117.877	3.21122	12.719	-1.40768	0.578103	-1.98579	TTC3	chr21:38472561:+;chr21:38472624:+;chr21:38472661:+	chr21_37100367_+;chr21_37100444_+
chr20:9414339-9414389:mpeak_114518|chr20_9049700_9459567_PLCB4_NM_+|	14.0891	-3.62948	1.81879	1.99555	0.0459828	NA	0	0	0	1.15205	1.05326	7.89357	23.1178	5.35875	35.7685	24.1931	22.1184	48.4139	#DIV/0!	10.6612	-Inf	-0.560165	-Inf	PLCB4	chr20:9414402:+	chr20_9433742_+
chr20:61536339-61536497:mpeak_118697|chr20_61513766_61569304_DIDO1_NM_-|	58.8361	-2.06058	1.05013	1.96222	0.0497365	0.236408	1.54119	10.7175	12.7745	19.5849	12.6391	79.4619	109.424	99.1368	70.8983	77.1874	89.527	123.14	8.9577	38.5318	-2.15754	-0.0526871	-2.10485	DIDO1	chr20:61536358:-;chr20:61536426:-	chr20_62905000_-;chr20_62905075_-;chr20_62905119_-
chr20:57395673-57395730:mpeak_118400|chr20_57394310_57425958_GNAS-AS1_NR_-|	18.5762	-2.70814	1.11678	2.42494	0.0153108	NA	18.4943	30.8128	17.8843	46.082	25.2782	46.3089	10.7883	12.0572	6.38724	4.6082	4.21303	0	229.85	889.287	-0.80839	1.72853	-2.53692	GNAS-AS1	chr20:57395676:-	chr20_58820615_-
chr20:45310314-45310371:mpeak_116796|chr20_45188837_45313124_SLC13A3_NM_-|	5.51518	-4.96124	1.75735	2.82313	0.00475571	NA	0	0	0.638724	5.76025	2.10652	4.73614	16.9531	8.03812	14.6906	1.15205	4.21303	7.89357	4.82883	95.0542	-4.30242	1.58154	-5.88397	SLC13A3	chr20:45310315:-	-
chr20:43565780-43565834:mpeak_116599|chr20_43538702_43567766_PABPC1L_NM_+|	31.7219	-2.91586	1.48756	1.96016	0.0499767	0.236879	0	1.33969	0	8.06436	6.31955	1.05248	50.8593	41.5303	47.9043	47.2341	92.6868	83.6718	2.86474	6.9038	-3.52637	-0.672422	-2.85395	PABPC1L	chr20:43565831:+	chr20_44937189_+
chr20:35860067-35860182:mpeak_116035|chr20_35807455_35869705_RPN2_NM_+|	620.349	-1.84737	0.612369	3.01675	0.00255496	0.0654817	18.4943	41.5303	21.7166	50.6902	63.1955	41.0466	1453.34	1298.16	1965.99	808.74	646.701	1034.58	1.73273	6.22212	-0.922503	0.921859	-1.84436	RPN2	chr20:35860125:+	-
chr20:33931920-33931970:mpeak_115778|chr20_33891872_33999945_UQCC1_NM_-|	48.0191	-5.20719	1.78619	2.91525	0.00355407	0.0737708	0	0	0	0	0	12.1035	117.13	135.308	99.6409	78.3395	56.876	76.8308	#DIV/0!	17.1238	-Inf	0.731523	-Inf	UQCC1	chr20:33931918:-	chr20_35344111_-
chr20:25286914-25287082:mpeak_115222|chr20_25275666_25371618_ABHD12_NM_-|	35.9811	-1.87143	0.898211	2.08351	0.0372045	0.201673	4.62357	16.0762	5.74851	14.9767	20.0119	24.7332	70.8947	42.87	97.7247	23.041	49.5032	61.5699	12.5057	44.5306	-1.17508	0.657125	-1.83221	ABHD12	chr20:25286927:-	chr20_25306293_-
chr20:20027646-20027702:mpeak_115040|chr20_20017006_20036690_CRNKL1_NM_-|	78.001	-3.42789	1.70024	2.01612	0.0437873	0.220374	0	0	0.638724	0	0	11.5772	141.789	107.175	201.837	168.199	139.03	165.765	0.425059	7.34294	-4.17996	-0.0693327	-4.11062	CRNKL1	chr20:20027650:-	-
chr2:73957395-73957445:mpeak_102984|chr2_73957156_73964517_TPRKB_NM_-|	52.8519	-3.31207	1.43464	2.30864	0.0209633	0.150625	0	0	1.27745	2.3041	4.21303	12.1035	72.4359	72.3431	155.21	123.269	55.8227	135.243	1.27749	5.9238	-3.86556	-0.0673956	-3.79817	TPRKB	chr2:73957387:-	chr2_73730261_-
chr2:65301489-65301625:mpeak_102150|chr2_65283494_65310772_CEP68_NM_+|	84.4829	-1.64567	0.652679	2.52141	0.0116886	0.118745	6.16476	12.0572	9.58085	11.5205	11.5858	6.84109	265.085	241.144	213.972	79.4915	81.1009	75.252	3.86042	12.698	-0.107203	1.61056	-1.71777	CEP68	chr2:65301624:+	chr2_65074488_+
chr2:61248138-61248188:mpeak_101656|chr2_61244811_61275606_PEX13_NM_+|	58.5986	-3.7287	1.70631	2.18524	0.0288713	0.176243	0	0	0	0	0	8.41981	86.3066	87.0796	138.603	123.269	93.74	165.765	#DIV/0!	6.59904	-Inf	-0.294998	-Inf	PEX13	chr2:61248150:+	chr2_61021006_+
chr2:44458550-44458617:mpeak_100655|chr2_44395941_44459454_PPM1B_NM_+|	62.1641	-2.34543	0.983944	2.3837	0.0171397	0.139346	12.3295	16.0762	61.9562	63.3628	58.9825	149.978	43.1533	84.4003	114.97	39.1697	35.8108	65.7798	37.259	193.466	-1.59153	0.784886	-2.37642	PPM1B	chr2:44458585:+;chr2:44458611:+	chr2_44231485_+
chr2:3477120-3477193:mpeak_97609|chr2_3383445_3482989_TRAPPC12_NM_+|	30.4269	-3.77924	1.59948	2.3628	0.0181376	0.141957	0	0	0	0	1.05326	7.89357	50.8593	48.2287	58.7626	65.6669	63.1955	69.4634	#DIV/0!	6.76677	-Inf	-0.329313	-Inf	TRAPPC12	chr2:3477200:+	-
chr2:33037730-33037863:mpeak_99834|chr2_32853086_33045882_TTC27_NM_+|	19.5593	-4.2601	1.83901	2.31651	0.0205303	NA	0	0	0	2.3041	0	7.89357	18.4943	32.1525	64.5111	23.041	16.8521	69.4634	#DIV/0!	13.9877	-Inf	0.0745726	-Inf	TTC27	chr2:33037781:+	-
chr2:220426429-220426506:mpeak_112294|chr2_220415564_220436268_OBSL1_NM_-|	32.7257	-2.64897	1.13686	2.33008	0.0198019	0.147137	92.4714	52.2478	72.8145	46.082	50.5564	51.5713	4.62357	12.0572	7.02596	1.15205	2.10652	0	917.604	3032.21	0.553598	2.86299	-2.30939	OBSL1	chr2:220426444:-	chr2_219561709_-;chr2_219561757_-
chr2:191799962-191800022:mpeak_110279|chr2_191745546_191827555_GLS_NM_+|	92.7285	-1.94557	0.918482	2.11824	0.0341548	0.192295	115.589	88.4193	266.348	86.4038	65.302	230.492	57.024	57.6065	100.28	18.4328	8.42607	18.4183	218.862	844.129	0.299433	2.24688	-1.94744	GLS	chr2:191799979:+;chr2:191800015:+	chr2_190935288_+
chr2:160984313-160984376:mpeak_108242|chr2_160958345_161056824_ITGB6_NM_-|	114.521	-4.87227	1.59591	3.05297	0.0022659	0.0634458	0	0	0.638724	9.21641	33.7043	3.15743	103.26	176.839	288.703	130.182	304.392	324.163	0.336879	6.07301	-6.17275	-0.415673	-5.75707	ITGB6	chr2:160984267:-	-
chr2:113011631-113011681:mpeak_105323|chr2_112974045_113012664_ZC3H8_NM_-|	26.4616	-4.10351	1.80894	2.26846	0.0233012	0.158523	0	0	0	0	0	8.94605	57.024	33.4922	65.1498	70.2751	43.1836	39.4679	#DIV/0!	17.5497	-Inf	0.0256149	-Inf	ZC3H8	chr2:113011647:-	-
chr2:105995931-105996003:mpeak_104889|chr2_105977891_106055230_FHL2_NM_-|	28.0521	-2.41565	1.14408	2.11144	0.0347348	0.194241	0	5.35875	1.91617	5.76025	10.5326	22.6282	81.6831	34.8319	26.8264	57.6025	33.7043	55.7812	7.61286	26.4611	-2.41955	-0.0372256	-2.38232	FHL2	chr2:105995968:-	chr2_105379485_-
chr2:10265746-10266124:mpeak_97919|chr2_10262694_10269360_RRM2_NM_+|	188.729	-1.7255	0.813052	2.12225	0.0338171	0.191345	13.8707	14.7366	9.58085	36.8656	45.2901	26.3119	271.249	238.464	622.755	290.317	189.587	505.715	3.37211	11.005	-1.50607	0.200371	-1.70644	RRM2	chr2:10265801:+	-
chr19:54672929-54672994:mpeak_96849|chr19_54664111_54676944_TMC4_NM_-|	40.6188	-3.26383	1.23767	2.63708	0.00836232	0.103888	1.54119	0	0.638724	4.6082	7.37281	3.15743	94.0126	93.7781	83.0341	64.5148	68.4618	66.306	1.20738	7.59647	-2.79587	0.442543	-3.23842	TMC4	chr19:54672930:-	chr19_54169194_-
chr19:538573-538645:mpeak_90983|chr19_531732_541338_CDC34_NM_+|	57.3147	-4.45154	1.57465	2.827	0.00469868	0.0819803	0	0	0	2.3041	0	8.94605	107.883	125.931	113.054	74.8833	102.166	152.609	#DIV/0!	5.119	-Inf	0.0734144	-Inf	CDC34	chr19:538631:+	chr19_538589_+;chr19_538646_+
chr19:53144619-53144676:mpeak_96552|chr19_53118050_53193834_ZNF83_NM_-|	28.1039	-4.36242	1.56818	2.78183	0.00540529	0.086335	0	0	0	2.3041	3.15978	14.2084	32.365	54.9272	30.6587	62.2107	87.4205	49.9926	#DIV/0!	9.85469	-Inf	-0.759098	-Inf	ZNF83	chr19:53144625:-;chr19:53144658:-	chr19_52641355_-;chr19_52641402_-
chr19:46322156-46322223:mpeak_95517|chr19_46318955_46366548_SYMPK_NM_-|	430.003	-2.93206	1.00811	2.90848	0.00363192	0.0743817	12.3295	10.7175	3.83234	32.2574	57.9292	8.41981	1363.95	1083.81	916.568	717.728	713.056	239.438	0.798952	5.90379	-1.87518	1.01028	-2.88546	SYMPK	chr19:46322166:-	chr19_45818909_-
chr19:41826838-41826962:mpeak_95008|chr19_41816093_41828499_CCDC97_NM_+|	35.9472	-2.36138	1.13692	2.077	0.0378017	0.203632	1.54119	1.33969	1.27745	1.15205	7.37281	12.1035	66.2712	75.0225	57.4851	84.0997	47.3966	76.3045	2.09194	9.92697	-2.31055	-0.0640382	-2.24652	CCDC97	chr19:41826902:+	chr19_41320994_+;chr19_41321057_+;chr19_41321082_+
chr19:41206692-41206758:mpeak_94917|chr19_41198278_41222790_ADCK4_NM_-|	11.971	-4.71838	1.54263	3.05865	0.00222337	NA	0	1.33969	0	3.45615	8.42607	13.156	24.659	16.0762	22.994	28.8013	13.6924	11.051	6.30645	46.7613	-4.22416	0.251215	-4.47538	ADCK4	chr19:41206683:-	-
chr19:34288712-34288765:mpeak_93997|chr19_34287750_34302695_KCTD15_NM_+|	26.024	-4.01583	1.7031	2.35796	0.0183758	0.142734	0	0	0	0	1.05326	7.36733	55.4828	28.1334	69.6209	43.7779	34.7575	72.0946	#DIV/0!	8.38537	-Inf	0.024756	-Inf	KCTD15	chr19:34288766:+	chr19_33797877_+
chr19:32920323-32920373:mpeak_93871|chr19_32896654_32972984_DPY19L3_NM_+|	25.8019	-3.15343	1.47534	2.13742	0.0325637	0.187597	0	0	0.638724	1.15205	2.10652	6.84109	57.024	36.1715	49.8204	49.5382	41.0771	65.2535	1.33983	6.47959	-3.98297	-0.124155	-3.85882	DPY19L3	chr19:32920374:+	chr19_32429467_+
chr19:15357784-15357966:mpeak_92712|chr19_15349256_15391262_BRD4_NM_-|	703.322	-1.54774	0.718001	2.15562	0.0311133	0.182923	232.72	139.327	337.246	375.569	256.995	706.211	1758.5	1132.04	995.131	956.202	922.655	627.276	18.2541	53.42	-0.91646	0.632699	-1.54916	BRD4	chr19:15357787:-;chr19:15357858:-;chr19:15357891:-	chr19_15246977_-;chr19_15247048_-;chr19_15247093_-
chr18:9367840-9367900:mpeak_87970|chr18_9334764_9399343_TWSG1_NM_+|	103.752	-5.21162	1.49441	3.48741	0.000487731	0.0385179	1.54119	0	0	6.9123	2.10652	17.3659	268.167	164.781	313.613	127.878	103.219	239.438	0.619315	5.60737	-4.09758	0.665959	-4.76354	TWSG1	chr18:9367891:+	chr18_9367891_+
chr17:8507709-8507792:mpeak_78798|chr17_8379266_8534079_MYH10_NM_-|	54.6795	-4.68649	1.73301	2.70425	0.00684593	0.0954191	0	0	0	1.15205	0	11.5772	86.3066	77.7018	174.372	88.7079	70.5683	145.768	#DIV/0!	6.2594	-Inf	0.149626	-Inf	MYH10	chr17:8507713:-	chr17_8604396_-
chr17:80111480-80111553:mpeak_87383|chr17_80059742_80170689_CCDC57_NM_-|	140.954	-5.32261	1.26947	4.19277	2.75569e-05	0.0144395	0	1.33969	0.638724	5.76025	10.5326	20.5233	303.614	345.639	474.572	138.246	148.509	242.07	0.264064	6.96187	-4.21792	1.08756	-5.30548	CCDC57	chr17:80111483:-	chr17_82153623_-
chr17:7588564-7588633:mpeak_78594|chr17_7573008_7590868_TP53_NM_-|	252.412	-3.01608	1.01925	2.95913	0.00308506	0.0695396	7.70595	1.33969	5.10979	14.9767	22.1184	65.2535	423.827	423.341	676.408	334.095	260.155	794.619	0.929092	7.36921	-2.85406	0.133551	-2.98762	TP53	chr17:7588533:-;chr17:7588567:-	chr17_7685235_-
chr17:65871808-65871936:mpeak_85945|chr17_65821779_65978367_BPTF_NM_+|	66.1093	-4.58119	1.76346	2.59784	0.00938119	0.108911	0	0	0	2.3041	0	18.9446	75.5183	84.4003	141.797	107.141	137.977	225.23	#DIV/0!	6.77648	-Inf	-0.64054	-Inf	BPTF	chr17:65871940:+	-
chr17:60513036-60513097:mpeak_85016|chr17_60501245_60525935_METTL2A_NM_+|	176.303	-1.60413	0.760929	2.10812	0.0350203	0.195297	10.7883	2.67937	5.10979	23.041	18.9587	12.6297	439.239	279.995	307.226	373.264	229.61	413.097	1.80986	5.37706	-1.55612	0.0148167	-1.57094	METTL2A	chr17:60513096:+	chr17_62435733_+
chr17:60087779-60087936:mpeak_84970|chr17_60023961_60142643_MED13_NM_-|	370.854	-1.4979	0.690496	2.1693	0.0300598	0.180106	30.8238	18.7556	12.7745	63.3628	38.9706	25.7857	699.7	730.129	1016.85	546.072	502.404	764.624	2.54851	7.0663	-1.03893	0.432365	-1.4713	MED13	chr17:60087788:-	chr17_62010429_-
chr17:45010164-45010240:mpeak_82475|chr17_45000485_45015964_GOSR2_NM_+|	90.1618	-1.51794	0.736766	2.06027	0.0393727	0.208366	10.7883	8.03812	9.58085	18.4328	12.6391	25.7857	249.673	131.289	201.198	173.96	89.527	151.03	4.87964	13.7166	-1.00109	0.489984	-1.49108	GOSR2	chr17:45010224:+	chr17_46932870_+
chr17:38286422-38286563:mpeak_81569|chr17_38278789_38290531_MSL1_NM_+|	253.44	-2.3877	0.914469	2.61102	0.00902727	0.106902	13.8707	6.69843	44.0719	72.5792	78.9944	211.021	542.499	380.471	360.24	422.803	362.321	545.709	5.03745	27.2457	-2.48784	-0.0525718	-2.43526	MSL1	chr17:38286428:+;chr17:38286495:+;chr17:38286548:+	-
chr17:35978331-35978420:mpeak_81300|chr17_35974398_36003493_DDX52_NM_-|	40.3682	-1.60934	0.794684	2.02513	0.0428544	0.217681	1.54119	5.35875	7.02596	14.9767	6.31955	16.8396	75.5183	87.0796	72.8145	67.971	61.089	67.8847	5.91553	19.3637	-1.45338	0.2574	-1.71078	DDX52	chr17:35978336:-	-
chr17:35620944-35620995:mpeak_81234|chr17_35444374_35766902_ACACA_NM_-|	61.2084	-5.51252	1.65677	3.32728	0.000876991	0.0460088	0	0	0	2.3041	1.05326	17.3659	107.883	109.854	178.204	78.3395	78.9944	160.503	#DIV/0!	6.52009	-Inf	0.317003	-Inf	ACACA	chr17:35620944:-	chr17_37264042_-
chr17:27263443-27263495:mpeak_80315|chr17_27233535_27278508_PHF12_NM_-|	13.7639	-3.58716	1.67598	2.14034	0.0323274	NA	0	0	0	1.15205	1.05326	7.89357	20.0355	24.1144	17.2455	24.1931	22.1184	47.3614	#DIV/0!	10.781	-Inf	-0.609502	-Inf	PHF12	chr17:27263440:-	-
chr17:27222309-27222461:mpeak_80300|chr17_27207617_27224715_FLOT2_NM_-|	219.707	-2.3878	0.794028	3.0072	0.00263665	0.0662021	9.24714	6.69843	7.02596	5.76025	17.9054	24.7332	688.912	578.745	537.167	306.446	299.125	154.714	1.27279	6.36588	-1.07513	1.24725	-2.32237	FLOT2	chr17:27222304:-	chr17_28895288_-;chr17_28895366_-
chr17:19234777-19234928:mpeak_79777|chr17_19140689_19237268_EPN2_NM_+|	153.024	-3.59056	1.09647	3.27464	0.00105797	0.0487208	0	2.67937	1.91617	8.06436	22.1184	54.7288	191.108	208.991	309.781	328.334	343.362	365.209	0.971054	8.18893	-4.20765	-0.546639	-3.66101	EPN2	chr17:19234877:+;chr17:19234964:+	chr17_19331466_+;chr17_19331560_+;chr17_19331650_+;chr17_19331507_+
chr16:89896979-89897029:mpeak_77314|chr16_89894906_89936457_SPIRE2_NM_+|	31.8522	-4.83379	1.93425	2.49905	0.0124525	0.121742	0	0	0	0	0	15.7871	53.9416	81.7209	49.1817	66.8189	75.8346	38.9416	#DIV/0!	26.0808	-Inf	0.0255842	-Inf	SPIRE2	chr16:89897031:+	chr16_89830584_+
chr16:8739636-8739692:mpeak_70959|chr16_8715526_8739964_METTL22_NM_+|	24.1858	-4.34979	1.69111	2.57215	0.0101068	0.112269	0	0	0	0	2.10652	7.36733	38.5297	34.8319	77.9243	24.1931	40.0238	65.2535	#DIV/0!	10.9761	-Inf	0.224655	-Inf	METTL22	chr16:8739683:+	chr16_8645829_+
chr16:81065019-81065097:mpeak_76366|chr16_81040102_81066174_CENPN_NM_+|	97.905	-1.60371	0.722101	2.2209	0.026358	0.167943	214.225	143.346	249.102	182.024	125.338	184.71	16.9531	22.7747	19.8004	9.21641	3.15978	4.2099	1019.14	2966.77	0.302054	1.8436	-1.54155	CENPN	chr16:81065088:+	chr16_81031483_+
chr16:79006316-79006449:mpeak_76267|chr16_78133309_79245504_WWOX_NM_+|	25.1213	-5.84334	1.52398	3.83427	0.000125936	0.0247952	0	0	0	2.3041	15.7989	8.94605	43.1533	48.2287	62.5949	23.041	46.3434	51.0451	#DIV/0!	22.4605	-Inf	0.354526	-Inf	WWOX	chr16:79006381:+	-
chr16:67939889-67939952:mpeak_74770|chr16_67927174_67961227_PSKH1_NM_+|	45.6538	-3.23005	1.5514	2.08202	0.0373407	0.202099	0	0	1.27745	6.9123	0	20.5233	69.3535	75.0225	53.6528	122.117	92.6868	106.3	1.93524	12.8162	-4.42471	-0.697332	-3.72738	PSKH1	chr16:67939947:+	chr16_67906044_+
chr16:46722157-46722207:mpeak_73745|chr16_46694563_46723144_VPS35_NM_-|	180.565	-5.26196	1.90863	2.75693	0.0058347	0.0893042	0	0	0	0	0	16.8396	359.097	290.712	560.161	218.89	188.533	532.553	#DIV/0!	5.37448	-Inf	0.364275	-Inf	VPS35	chr16:46722156:-	chr16_46688245_-
chr16:4513363-4513592:mpeak_70801|chr16_4511960_4524896_NMRAL1_NM_-|	128.342	-2.09512	0.659301	3.17779	0.001484	0.0559703	7.70595	4.01906	5.74851	14.9767	18.9587	17.8921	332.897	242.483	288.064	163.591	207.492	236.281	2.0237	8.53317	-1.56854	0.507542	-2.07609	NMRAL1	chr16:4513536:-	chr16_4463360_-
chr16:3498585-3498665:mpeak_70627|chr16_3493667_3535466_NAA60_NM_+|	89.3676	-2.71519	0.906374	2.99566	0.00273854	0.0670037	3.08238	4.01906	1.91617	8.06436	8.42607	23.1545	188.025	163.442	233.773	146.31	184.32	107.879	1.54084	9.04083	-2.13632	0.41642	-2.55274	NAA60	chr16:3498655:+	chr16_3448654_+
chr16:3181662-3181727:mpeak_70539|chr16_3175967_3184883_ZNF213-AS1_NR_-|	12.7015	-3.18614	1.48358	2.1476	0.0317455	NA	1.54119	14.7366	5.10979	14.9767	26.3315	37.8891	13.8707	17.4159	5.10979	8.06436	7.37281	0	58.7627	342.02	-1.88868	1.23739	-3.12607	ZNF213-AS1	chr16:3181669:-	chr16_3131656_-
chr16:31725523-31725580:mpeak_73565|chr16_31724549_31770677_ZNF720_NM_+|	135.496	-4.04277	1.76238	2.29392	0.0217949	0.15326	0	1.33969	0	0	0	15.7871	371.427	274.636	212.695	261.516	268.581	219.968	0.468009	6.31432	-3.55878	0.195237	-3.75402	ZNF720	chr16:31725576:+;chr16:31725625:+	chr16_31714252_+
chr16:2389431-2389537:mpeak_70339|chr16_2326806_2390747_ABCA3_NM_-|	90.4288	-3.76158	0.948728	3.96487	7.34355e-05	0.0211172	3.08238	0	1.91617	17.2808	11.5858	10.5248	263.543	188.896	210.779	129.03	166.415	82.0931	1.13052	10.4338	-2.9783	0.812863	-3.79116	ABCA3	chr16:2389446:-	chr16_2339447_-
chr16:23434899-23435038:mpeak_72499|chr16_23400407_23464512_COG7_NM_-|	43.9368	-2.1728	0.965117	2.25134	0.0243641	0.161766	6.16476	1.33969	0.638724	3.45615	6.31955	5.78862	101.719	100.476	127.106	61.0587	45.2901	67.8847	2.47287	8.93302	-0.93458	0.918385	-1.85297	COG7	chr16:23434985:-	chr16_23423664_-
chr16:2300662-2300891:mpeak_70323|chr16_2290146_2301602_ECI1_NM_-|	379.315	-2.33647	0.532821	4.38509	1.15938e-05	0.0111501	20.0355	25.454	14.6906	72.5792	46.3434	47.3614	933.961	838.644	1004.07	536.856	469.753	542.025	2.16734	10.7375	-1.46629	0.842364	-2.30865	ECI1	chr16:2300722:-;chr16:2300804:-	chr16_2250666_-;chr16_2250721_-;chr16_2250768_-
chr16:19626485-19626629:mpeak_72077|chr16_19566736_19711699_C16orf62_NM_+|	80.3895	-2.52867	1.07994	2.34149	0.0192068	0.145342	3.08238	5.35875	4.47107	8.06436	5.26629	43.6778	143.331	121.911	236.328	146.31	90.5802	156.293	2.57436	14.4992	-2.14244	0.351248	-2.49369	C16orf62	chr16:19626536:+;chr16:19626597:+;chr16:19626634:+;chr16:19626660:+	chr16_19615213_+;chr16_19615287_+
chr16:19196082-19196132:mpeak_72020|chr16_19179534_19278201_SYT17_NM_+|	19.8698	-5.19548	2.14003	2.42776	0.0151923	NA	0	0	0	0	0	14.2084	24.659	91.0987	17.8843	12.6726	42.1303	35.7842	#DIV/0!	47.0545	-Inf	0.560996	-Inf	SYT17	chr16:19196127:+	chr16_19184804_+
chr15:80456034-80456092:mpeak_68260|chr15_80445232_80478471_FAH_NM_+|	43.709	-3.89581	1.74308	2.23502	0.0254159	0.165106	0	0	1.91617	0	0	16.8396	112.507	97.7971	133.493	52.9943	40.0238	68.9372	1.67206	31.1931	-3.13556	1.08596	-4.22152	FAH	chr15:80456086:+	chr15_80163700_+;chr15_80163743_+
chr15:75188965-75189036:mpeak_67723|chr15_75182351_75189852_MPI_NM_+|	38.6025	-3.55037	1.48808	2.38587	0.017039	0.139193	1.54119	1.33969	0	2.3041	0	12.1035	103.26	93.7781	80.4792	66.8189	55.8227	45.7827	1.55714	12.8315	-2.32225	0.720475	-3.04272	MPI	chr15:75188972:+;chr15:75189038:+	chr15_74896632_+;chr15_74896695_+
chr15:75186069-75186131:mpeak_67722|chr15_75182351_75189852_MPI_NM_+|	41.7204	-1.93341	0.813093	2.37785	0.017414	0.13988	4.62357	4.01906	7.66468	5.76025	12.6391	19.997	103.26	93.7781	80.4792	66.8189	55.8227	45.7827	5.87615	22.7974	-1.23545	0.720475	-1.95593	MPI	chr15:75186127:+	chr15_74893784_+
chr15:52673737-52673796:mpeak_65534|chr15_52606045_52821247_MYO5A_NM_-|	70.2277	-4.59004	1.33378	3.44138	0.000578759	0.0399372	0	0	1.91617	5.76025	4.21303	31.048	178.778	137.988	169.262	116.357	95.8465	101.564	1.18275	13.0738	-4.42008	0.631341	-5.05142	MYO5A	chr15:52673742:-	chr15_52381548_-
chr15:48454429-48454492:mpeak_64756|chr15_48446090_48470558_MYEF2_NR_-mpeak_64756|chr15_48435268_48470558_MYEF2_NM_-||	44.0417	-5.0085	1.4797	3.38481	0.000712266	0.042306	0	1.33969	0	14.9767	4.21303	12.6297	84.7654	57.6065	127.106	49.5382	48.4499	127.876	1.49142	14.0879	-4.56994	0.254713	-4.82465	MYEF2	chr15:48454437:-	chr15_48162241_-
chr15:48449325-48449376:mpeak_64752|chr15_48446090_48470558_MYEF2_NR_-mpeak_64752|chr15_48435268_48470558_MYEF2_NM_-||	42.6024	-5.08106	1.72017	2.95381	0.00313874	0.0699248	0	0	0	1.15205	1.05326	13.6822	84.7654	57.6065	127.106	49.5382	48.4499	127.876	#DIV/0!	7.0341	-Inf	0.254713	-Inf	MYEF2	chr15:48449324:-	chr15_48157128_-
chr15:41581280-41581426:mpeak_64137|chr15_41576200_41590238_OIP5-AS1_NR_+|	71.3385	-1.83021	0.820705	2.23005	0.0257444	0.166067	10.7883	5.35875	6.38724	19.5849	28.438	24.207	144.872	80.3812	170.539	100.228	71.6216	193.656	5.69347	19.7616	-1.68047	0.11485	-1.79532	OIP5-AS1	chr15:41581353:+	chr15_41289101_+;chr15_41289169_+
chr14:91072164-91072215:mpeak_61565|chr14_91007933_91282761_TTC7B_NM_-|	11.6932	-2.82727	1.41454	1.99873	0.0456379	NA	1.54119	0	1.27745	8.06436	3.15978	13.6822	12.3295	12.0572	26.1877	17.2808	10.5326	34.2055	8.35988	40.1593	-3.14344	-0.2943	-2.84914	TTC7B	chr14:91072162:-	chr14_90605819_-
chr14:89728774-89728846:mpeak_61452|chr14_89629313_90085494_FOXN3_NM_-|	36.2835	-4.25384	1.54132	2.75986	0.00578254	0.0889647	0	0	0	0	5.26629	8.41981	49.3181	52.2478	83.0341	57.6025	88.4737	91.0392	#DIV/0!	8.65787	-Inf	-0.361188	-Inf	FOXN3	chr14:89728792:-	chr14_89262430_-
chr14:74331384-74331522:mpeak_60519|chr14_74318533_74350803_PTGR2_NM_+|	32.7327	-3.23154	1.3258	2.43744	0.0147919	0.130839	1.54119	0	0.638724	5.76025	2.10652	4.2099	107.883	65.6446	58.7626	41.4738	67.4086	37.3629	1.40766	8.25782	-2.46988	0.66754	-3.13742	PTGR2	chr14:74331440:+;chr14:74331520:+	chr14_73864731_+;chr14_73864817_+
chr14:50269955-50270015:mpeak_57476|chr14_50251431_50319791_NEMF_NM_-|	27.1225	-3.34377	1.47384	2.26875	0.0232836	0.158491	0	0	0	8.06436	6.31955	2.63119	24.659	18.7556	40.8783	78.3395	73.7281	72.0946	#DIV/0!	7.59053	-Inf	-1.41106	-Inf	NEMF	chr14:50269954:-	chr14_49803236_-;chr14_49803282_-
chr14:23520718-23520873:mpeak_55948|chr14_23516583_23526747_CDH24_NM_-|	16.9622	-2.19716	0.96167	2.28474	0.0223283	NA	15.4119	6.69843	14.0519	13.8246	8.42607	32.1005	21.5767	26.7937	35.7685	11.5205	10.5326	6.84109	42.9792	188.104	-0.587827	1.54199	-2.12982	CDH24	chr14:23520756:-;chr14:23520781:-;chr14:23520820:-	chr14_23051509_-;chr14_23051604_-;chr14_23051638_-
chr14:23517914-23517971:mpeak_55947|chr14_23516583_23526747_CDH24_NM_-|	11.0879	-4.42738	1.86818	2.36989	0.0177934	NA	3.08238	0	0	1.15205	0	15.7871	21.5767	26.7937	35.7685	11.5205	10.5326	6.84109	10.9903	87.9374	-2.45825	1.54199	-4.00024	CDH24	chr14:23517913:-	chr14_23048705_-
chr14:104154412-104154466:mpeak_62945|chr14_104095524_104167537_KLC1_NM_+|	69.441	-3.94239	1.78479	2.20888	0.0271827	0.170764	1.54119	0	0	3.45615	0	26.3119	86.3066	91.0987	121.357	79.4915	143.243	280.485	1.54757	8.87328	-4.27165	-0.752187	-3.51946	KLC1	chr14:104154464:+	chr14_103688126_+
chr13:35615390-35615474:mpeak_52082|chr13_35516423_36245037_NBEA_NM_+|	47.7287	-4.41283	1.60702	2.74597	0.00603316	0.0905528	0	0	0	1.15205	0	9.47228	86.3066	96.4574	106.667	79.4915	92.6868	100.511	#DIV/0!	5.84419	-Inf	0.0859586	-Inf	NBEA	chr13:35615432:+	chr13_35041292_+
chr13:34411577-34411648:mpeak_52018|chr13_34392205_34540223_RFC3_NM_+|	126.139	-2.02838	0.847251	2.39407	0.0166623	0.13753	188.025	116.553	247.186	314.51	253.835	328.373	4.62357	22.7747	19.1617	2.3041	9.47933	6.84109	1185.06	4814.71	-0.700603	1.32189	-2.02249	RFC3	chr13:34411582:+;chr13:34411633:+	chr13_33837466_+;chr13_33837499_+
chr12:26627116-26627170:mpeak_40536|chr12_26492416_26986131_ITPR2_NM_-|	35.7272	-2.6021	1.06089	2.45275	0.0141768	0.128506	0	1.33969	1.91617	5.76025	3.15978	8.41981	83.2243	66.9843	80.4792	73.7313	56.876	46.8352	2.11705	9.77209	-2.41298	0.378591	-2.79157	ITPR2	chr12:26627117:-	-
chr12:124440790-124440928:mpeak_49979|chr12_124422377_124457532_CCDC92_NM_-|	57.5786	-1.6681	0.691387	2.41268	0.0158356	0.13473	7.70595	16.0762	7.02596	10.3685	15.7989	22.102	141.789	125.931	134.132	66.8189	77.9411	65.2535	7.66654	22.9839	-0.647795	0.936181	-1.58398	CCDC92	chr12:124440741:-	chr12_123956177_-;chr12_123956249_-
chr12:124017365-124017415:mpeak_49882|chr12_123957229_124018265_RILPL1_NM_-|	29.9864	-4.32701	1.85579	2.33163	0.0197203	0.146847	0	0	0	0	0	9.99852	49.3181	32.1525	100.28	50.6902	63.1955	54.2025	#DIV/0!	17.8451	-Inf	0.112738	-Inf	RILPL1	chr12:124017363:-	chr12_123532818_-
chr12:113402591-113402670:mpeak_48562|chr12_113376237_113407766_OAS3_NM_+|	80.5498	-2.73452	1.33765	2.04427	0.040927	0.212516	3.08238	0	3.19362	0	2.10652	18.4183	249.673	170.14	205.669	134.79	105.326	74.1996	1.50508	9.79503	-1.70945	0.992755	-2.70221	OAS3	chr12:113402671:+	-
chr12:113382641-113382797:mpeak_48561|chr12_113376237_113407766_OAS3_NM_+|	104.879	-1.62316	0.684002	2.37304	0.0176423	0.14058	63.1888	22.7747	40.2396	59.9066	46.3434	86.303	249.673	170.14	205.669	134.79	105.326	74.1996	20.1769	61.2611	-0.609509	0.992755	-1.60226	OAS3	chr12:113382698:+;chr12:113382793:+	chr12_112944893_+;chr12_112944983_+
chr12:112107383-112107458:mpeak_48333|chr12_112082366_112123800_BRAP_NM_-|	43.8552	-3.56282	1.52741	2.33259	0.0196696	0.146744	0	0	0.638724	0	2.10652	6.84109	118.672	64.305	112.415	87.5559	85.314	48.4139	0.648688	6.06525	-3.80824	0.416733	-4.22497	BRAP	chr12:112107381:-	chr12_111669587_-
chr11:82922453-82922509:mpeak_35834|chr11_82904780_82923694_ANKRD42_NR_+mpeak_35834|chr11_82904780_82966886_ANKRD42_NM_+||	8.23657	-3.71138	1.87591	1.97844	0.0478787	NA	0	0	0.638724	1.15205	0	8.94605	23.1178	9.37781	18.523	14.9767	6.31955	15.7871	3.75582	40.8462	-3.98275	0.460253	-4.443	ANKRD42	chr11:82922510:+	chr11_83211466_+
chr11:78284275-78284328:mpeak_35688|chr11_78147860_78285909_NARS2_NM_-|	19.303	-4.47291	1.79399	2.49328	0.012657	NA	0	0	0	0	1.05326	8.41981	27.7414	21.435	74.7307	34.5615	26.3315	37.3629	#DIV/0!	14.4618	-Inf	0.334643	-Inf	NARS2	chr11:78284277:-	chr11_78573233_-
chr11:77524198-77524256:mpeak_35597|chr11_77378536_77531880_RSF1_NM_-|	46.6525	-2.90805	1.45924	1.99285	0.0462777	0.22677	1.54119	0	1.91617	1.15205	0	15.2609	115.589	133.969	81.7566	87.5559	72.6748	48.4139	1.56529	11.7997	-2.24709	0.667154	-2.91425	RSF1	chr11:77524203:-	chr11_77813160_-
chr11:73556123-73556190:mpeak_35071|chr11_73498916_73575340_MRPL48_NM_+|	189.946	-1.84705	0.942036	1.9607	0.0499143	0.236862	3.08238	6.69843	20.4392	12.6726	9.47933	37.3629	596.441	328.223	512.256	274.188	219.078	259.435	2.10311	7.90683	-0.977746	0.93283	-1.91058	MRPL48	chr11:73556138:+;chr11:73556186:+	chr11_73845137_+
chr11:66555539-66555589:mpeak_34054|chr11_66512206_66610639_C11orf80_NM_+|	23.3135	-3.57722	1.63565	2.18703	0.02874	0.175746	0	1.33969	0.638724	1.15205	0	9.99852	66.2712	64.305	46.6268	11.5205	34.7575	43.1515	1.6747	18.7028	-2.4947	0.986579	-3.48128	C11orf80	chr11:66555592:+	chr11_66788118_+
chr11:6639302-6639352:mpeak_30186|chr11_6635917_6640692_TPP1_NM_-|	102.397	-3.66958	1.58023	2.32218	0.0202231	0.14833	1.54119	0	0	0	0	8.41981	238.884	243.823	248.463	148.615	155.882	183.131	0.632351	5.18006	-2.44974	0.584429	-3.03417	TPP1	chr11:6639294:-	chr11_6618049_-
chr11:63776481-63776556:mpeak_33469|chr11_63766159_63933585_MACROD1_NM_-|	43.5733	-2.44646	0.888118	2.75465	0.00587545	0.0894902	1.54119	1.33969	3.83234	12.6726	8.42607	7.89357	89.389	104.496	97.086	47.2341	58.9825	89.9867	2.30718	14.7766	-2.11059	0.568524	-2.67911	MACROD1	chr11:63776485:-	chr11_64009015_-
chr11:62584897-62585042:mpeak_33318|chr11_62575138_62599563_STX5_NM_-|	78.847	-2.16819	0.901356	2.40547	0.0161515	0.135752	10.7883	1.33969	1.27745	10.3685	7.37281	8.41981	237.343	196.934	168.623	127.878	74.7814	101.038	2.2235	8.61421	-0.964601	0.989288	-1.95389	STX5	chr11:62584896:-;chr11:62584932:-	chr11_62817425_-;chr11_62817458_-
chr11:20399302-20399352:mpeak_31226|chr11_20385230_20404525_HTATIP2_NM_+|	84.2591	-4.31156	1.76062	2.44888	0.0143301	0.12891	0	0	0	0	0	8.41981	158.743	113.873	281.677	133.638	91.6335	223.125	#DIV/0!	5.63328	-Inf	0.305874	-Inf	HTATIP2	chr11:20399376:+	chr11_20377830_+
chr11:1760623-1760681:mpeak_29785|chr11_1756659_1771824_IFITM10_NM_-|	102.852	-3.68991	1.46951	2.51099	0.0120393	0.120003	0	2.67937	0	0	3.15978	13.6822	257.379	239.804	240.799	168.199	198.013	110.51	1.0892	5.2993	-2.65209	0.630436	-3.28253	IFITM10	chr11:1760617:-	chr11_1739389_-
chr11:108206984-108207131:mpeak_37040|chr11_108093558_108236051_ATM_NM_+|	12.0331	-4.21245	1.75765	2.39663	0.0165465	NA	0	1.33969	0.638724	0	9.47933	22.6282	21.5767	13.3969	23.6328	19.5849	26.3315	5.78862	5.06365	93.1465	-4.0205	0.180753	-4.20125	ATM	chr11:108207135:+	chr11_108336403_+;chr11_108336450_+
chr10:5920045-5920104:mpeak_20224|chr10_5904654_5931860_ANKRD16_NM_-|	32.0739	-2.6808	0.811701	3.30269	0.000957605	0.0473525	60.1064	30.8128	32.5749	33.4095	25.2782	17.8921	43.1533	75.0225	49.8204	5.76025	7.37281	3.68367	73.5101	455.378	0.689407	3.32046	-2.63105	ANKRD16	chr10:5920052:-	chr10_5878090_-
chr10:5728812-5728863:mpeak_20144|chr10_5726800_5804991_FAM208B_NM_+|	30.1326	-3.75371	1.78458	2.10342	0.0354294	0.196435	1.54119	0	0	0	1.05326	16.8396	41.6121	44.2097	70.2596	70.2751	37.9173	77.8832	2.96228	14.4239	-3.53727	-0.253591	-3.28368	FAM208B	chr10:5728868:+	chr10_5686900_+
chr10:52101957-52102122:mpeak_23534|chr10_52067081_52383737_SGMS1_NM_-|	42.4153	-3.98805	1.54533	2.58071	0.00985984	0.11132	1.54119	0	0	5.76025	4.21303	16.3134	78.6007	33.4922	84.3115	61.0587	55.8227	167.87	2.35411	9.23145	-4.09221	-0.535876	-3.55634	SGMS1	chr10:52101954:-;chr10:52101995:-	chr10_50342197_-
chr10:131902831-131902949:mpeak_29378|chr10_131862647_131909081_LINC00959_NR_-|	9.1045	-3.04875	1.31177	2.32414	0.020118	NA	3.08238	0	0.638724	6.9123	13.6924	14.7347	7.70595	10.7175	11.497	9.21641	11.5858	19.4708	18.655	87.7493	-3.24747	-0.428682	-2.81879	LINC00959	chr10:131902832:-;chr10:131902898:-	chr10_130104570_-;chr10_130104635_-
chr10:1132627-1132677:mpeak_19976|chr10_1102775_1175152_WDR37_NM_+|	43.6667	-3.93444	1.76073	2.23455	0.025447	0.165122	0	0	0	0	0	9.99852	67.8124	68.324	94.5311	74.8833	81.1009	127.35	#DIV/0!	10.5867	-Inf	-0.296688	-Inf	WDR37	chr10:1132679:+	chr10_1086737_+
chr10:102745997-102746094:mpeak_27244|chr10_102739129_102747276_MRPL43_NM_-|	371.24	-2.02459	0.927494	2.18286	0.0290462	0.176869	890.808	588.122	1163.12	601.371	471.86	700.423	12.3295	9.37781	10.8583	3.45615	3.15978	0	8112.99	17872.6	0.574932	2.29933	-1.7244	MRPL43	chr10:102745995:-;chr10:102746033:-	chr10_100986277_-;chr10_100986346_-
chr10:102741128-102741188:mpeak_27242|chr10_102739129_102747276_MRPL43_NM_-|	11.4814	-2.84575	1.24188	2.29149	0.0219353	NA	12.3295	10.7175	20.4392	10.3685	13.6924	31.048	12.3295	9.37781	10.8583	3.45615	3.15978	0	133.534	555.315	-0.341728	2.29933	-2.64106	MRPL43	chr10:102741133:-	chr10_100981377_-
chr10:102134006-102134471:mpeak_27172|chr10_102133332_102147793_OLMALINC_NR_+|	117.872	-1.80943	0.844568	2.14243	0.0321589	0.18644	58.5652	159.423	47.2655	292.621	439.209	322.058	7.70595	14.7366	21.0779	20.7369	18.9587	12.1035	609.493	2034.57	-1.99028	-0.251234	-1.73904	OLMALINC	chr10:102134175:+	chr10_100374497_+
chr10:100162149-100162260:mpeak_26962|chr10_100143625_100174978_PYROXD2_NM_-|	10.2658	-3.09948	1.17342	2.64141	0.00825606	NA	1.54119	4.01906	5.74851	5.76025	9.47933	24.207	21.5767	9.37781	21.0779	4.6082	8.42607	7.36733	21.7341	193.35	-1.80246	1.35073	-3.15318	PYROXD2	chr10:100162154:-;chr10:100162184:-;chr10:100162210:-	chr10_98402417_-
chr1:7836776-7836836:mpeak_544|chr1_7831328_7839685_VAMP3_NM_+|	60.982	-2.67617	1.1313	2.36558	0.0180021	0.141489	0	2.67937	6.38724	5.76025	4.21303	28.9431	144.872	132.629	147.545	64.5148	78.9944	115.246	3.19963	15.0398	-2.10174	0.71603	-2.81777	VAMP3	chr1:7836835:+	chr1_7776773_+
chr1:65216479-65216529:mpeak_5695|chr1_65210777_65296521_RAVER2_NM_+|	15.7869	-4.11871	1.96589	2.09509	0.036163	NA	0	0	0	0	0	10.5248	20.0355	28.1334	37.046	18.4328	25.2782	49.9926	#DIV/0!	33.6959	-Inf	-0.137	-Inf	RAVER2	chr1:65216554:+	-
chr1:46072397-46072557:mpeak_4418|chr1_46049659_46083732_NASP_NM_+|	150.417	-2.06618	0.858438	2.4069	0.0160884	0.135664	6.16476	8.03812	7.66468	13.8246	26.3315	65.2535	194.19	211.67	368.544	299.533	256.995	346.791	2.82379	11.6691	-2.26914	-0.22215	-2.04699	NASP	chr1:46072547:+	-
chr1:38046463-38046513:mpeak_3457|chr1_38032608_38061586_GNL2_NM_-|	64.1758	-3.63927	1.68617	2.1583	0.0309043	0.182408	1.54119	0	0	0	0	8.94605	175.696	120.572	150.739	139.398	114.805	58.4124	1.03434	8.58502	-2.53721	0.515904	-3.05311	GNL2	chr1:38046456:-	-
chr1:29396547-29396597:mpeak_2645|chr1_29213602_29443330_EPB41_NM_+|	98.2004	-3.7205	1.59087	2.33865	0.0193536	0.145966	1.54119	0	0	0	0	8.41981	285.12	204.972	221.637	144.006	165.362	147.347	0.649625	5.53068	-2.44974	0.640036	-3.08978	EPB41	chr1:29396629:+	chr1_29070114_+
chr1:247318267-247318346:mpeak_19705|chr1_247287173_247335319_ZNF124_NM_-|	7.07003	-2.66245	1.20883	2.2025	0.02763	NA	4.62357	2.67937	2.55489	14.9767	13.6924	6.84109	9.24714	8.03812	8.30341	2.3041	3.15978	8.41981	38.5242	255.769	-1.84889	0.882114	-2.731	ZNF124	chr1:247318261:-;chr1:247318287:-	chr1_247154990_-
chr1:23708419-23708469:mpeak_1963|chr1_23707967_23751272_TCEA3_NM_-|	15.8566	-3.24059	1.43759	2.25418	0.0241849	NA	0	1.33969	0	3.45615	2.10652	5.78862	26.2002	30.8128	28.1038	34.5615	31.5978	26.3119	4.72181	12.2755	-3.08289	-0.119559	-2.96333	TCEA3	chr1:23708412:-;chr1:23708442:-	chr1_23381926_-
chr1:236347160-236347210:mpeak_19185|chr1_236305831_236371349_GPR137B_NM_+|	20.4658	-3.72562	1.84484	2.01948	0.0434371	NA	0	0	0	0	0	7.89357	36.9886	28.1334	46.6268	32.2574	26.3315	67.3585	#DIV/0!	18.8021	-Inf	-0.172562	-Inf	GPR137B	chr1:236347237:+	-
chr1:220932326-220932386:mpeak_17965|chr1_220921675_220957260_MARC2_NM_+|	14.9912	-4.83071	1.623	2.97641	0.00291644	NA	0	0	0.638724	2.3041	4.21303	18.9446	24.659	20.0953	39.6009	29.9533	24.2249	15.2609	2.27155	36.6676	-5.31699	0.280727	-5.59772	MARC2	chr1:220932377:+	chr1_220759034_+
chr1:193026285-193026465:mpeak_15837|chr1_192989586_193029237_UCHL5_NR_-mpeak_15837|chr1_192985525_193028523_UCHL5_NM_-||	196.373	-1.76669	0.584997	3.02	0.00252778	0.0651175	24.659	20.0953	15.3294	41.4738	46.3434	38.4154	560.993	328.223	441.358	353.68	253.835	232.071	4.51562	15.0351	-1.07104	0.664299	-1.73534	UCHL5	chr1:193026400:-	chr1_193057268_-
chr1:174215211-174215493:mpeak_14520|chr1_174128551_174958985_RABGAP1L_NM_+|	24.3867	-2.61653	1.03396	2.5306	0.0113866	0.117528	7.70595	8.03812	4.47107	12.6726	9.47933	37.8891	60.1064	26.7937	53.0141	34.5615	26.3315	11.5772	14.4482	82.8492	-1.57051	0.949082	-2.51959	RABGAP1L	chr1:174215295:+;chr1:174215484:+	chr1_174246114_+;chr1_174246157_+;chr1_174246355_+
chr1:154961432-154961672:mpeak_12592|chr1_154955769_154965188_FLAD1_NM_+|	109.248	-1.3798	0.627929	2.19739	0.0279926	0.173584	98.6362	52.2478	68.3434	140.55	87.4205	182.605	149.495	111.194	134.771	102.533	68.4618	114.72	55.436	143.701	-0.905219	0.468959	-1.37418	FLAD1	chr1:154961488:+;chr1:154961541:+	chr1_154989011_+;chr1_154989128_+
chr1:154317908-154318059:mpeak_12507|chr1_154298035_154321315_ATP8B2_NM_+|	66.4929	-4.37572	1.81768	2.40731	0.0160707	0.13562	0	0	0	0	0	11.051	138.707	77.7018	180.759	87.5559	107.432	194.708	#DIV/0!	8.50739	-Inf	0.0273979	-Inf	ATP8B2	chr1:154318042:+	-
chr1:154234171-154234255:mpeak_12493|chr1_154192647_154243356_UBAP2L_NM_+|	34.4457	-2.3928	0.970143	2.46644	0.0136462	0.126339	4.62357	8.03812	0	10.3685	12.6391	15.7871	53.9416	88.4193	72.1758	48.3861	48.4499	50.5189	8.85281	26.3274	-1.61539	0.54193	-2.15732	UBAP2L	chr1:154234174:+	-
chr1:154230057-154230174:mpeak_12491|chr1_154192647_154243356_UBAP2L_NM_+|	37.5262	-1.3918	0.705743	1.97211	0.0485969	0.233288	10.7883	16.0762	5.74851	18.4328	18.9587	18.4183	53.9416	88.4193	72.1758	48.3861	48.4499	50.5189	15.2016	37.8744	-0.775068	0.54193	-1.317	UBAP2L	chr1:154230202:+	chr1_154257724_+
chr1:145604689-145604986:mpeak_10756|chr1_145592256_145611044_POLR3C_NM_-|	38.7075	-3.51807	0.688254	5.11159	3.19462e-07	0.00126735	6.16476	12.0572	5.74851	42.6259	54.7695	66.8322	63.1888	53.5875	53.6528	31.1054	42.1303	32.6268	14.0648	155.133	-2.77637	0.68698	-3.46335	POLR3C	chr1:145604792:-	-
chr1:145592911-145593044:mpeak_10746|chr1_145592256_145611044_POLR3C_NM_-|	30.4155	-2.36821	0.93794	2.5249	0.0115731	0.118291	16.9531	0	5.10979	21.889	16.8521	27.8906	63.1888	53.5875	53.6528	31.1054	42.1303	32.6268	19.4182	62.9418	-1.59459	0.68698	-2.28157	POLR3C	chr1:145592915:-;chr1:145592990:-	chr1_145842119_+;chr1_145842191_+
chr1:12669971-12670152:mpeak_1100|chr1_12628453_12677737_DHRS3_NM_-|	42.018	-3.05733	1.17088	2.61115	0.00902395	0.106902	0	1.33969	3.19362	3.45615	17.9054	11.5772	41.6121	97.7971	130.938	49.5382	50.5564	96.3016	2.51526	16.7716	-2.86115	0.461049	-3.3222	DHRS3	chr1:12670079:-	chr1_12610071_-
chr1:1254050-1254251:mpeak_134|chr1_1247304_1260067_CPSF3L_NM_-|	55.3657	-1.89578	0.92621	2.04682	0.040676	0.211941	3.08238	12.0572	26.8264	29.9533	16.8521	62.0961	103.26	87.0796	116.886	72.5792	68.4618	65.2535	13.6596	52.7894	-1.37573	0.574594	-1.95033	CPSF3L	chr1:1254049:-;chr1:1254075:-;chr1:1254117:-;chr1:1254168:-;chr1:1254196:-	chr1_1318681_-;chr1_1318738_-;chr1_1318790_-;chr1_1318814_-;chr1_1318863_-
chr1:1251993-1252062:mpeak_132|chr1_1247304_1260067_CPSF3L_NM_-|	43.5389	-4.67988	1.69938	2.75388	0.00588942	0.0895605	0	0	0	0	0	8.94605	103.26	87.0796	116.886	72.5792	68.4618	65.2535	#DIV/0!	13.0096	-Inf	0.574594	-Inf	CPSF3L	chr1:1251991:-	-
chr1:114372641-114372790:mpeak_9112|chr1_114355233_114442493_AP4B1-AS1_NR_+|	37.6436	-3.72055	1.16107	3.20443	0.0013533	0.0534864	0	0	1.91617	4.6082	11.5858	8.94605	89.389	58.9462	105.389	47.2341	56.876	66.8322	2.26565	14.7068	-3.71369	0.569754	-4.28345	AP4B1-AS1	chr1:114372791:+	chr1_113830090_+;chr1_113830168_+
chr1:113116241-113116303:mpeak_8838|chr1_113068733_113162040_ST7L_NM_-|	5.36283	-4.08256	1.83737	2.22196	0.0262859	NA	0	0	0.638724	5.76025	1.05326	14.2084	7.70595	8.03812	4.47107	10.3685	8.42607	3.68367	9.47889	93.5215	-5.04056	-0.15309	-4.88747	ST7L	chr1:113116252:-	chr1_112573606_-
chr1:111737690-111737830:mpeak_8660|chr1_111730303_111747160_DENND2D_NM_-|	86.3799	-2.38324	0.892157	2.67132	0.00755537	0.0993309	1.54119	0	4.47107	6.9123	20.0119	13.156	194.19	132.629	160.32	165.895	152.723	184.71	1.8513	7.96304	-2.73691	-0.047165	-2.68975	DENND2D	chr1:111737802:-	-
chr1:1036472-1036588:mpeak_104|chr1_1018367_1051736_C1orf159_NM_-|	21.9777	-2.31941	1.1049	2.09919	0.0357999	0.197686	1.54119	9.37781	1.91617	6.9123	14.7456	20.5233	30.8238	54.9272	36.4072	39.1697	35.8108	11.5772	10.507	48.7319	-1.7165	0.497016	-2.21351	C1orf159	chr1:1036479:-	-
chrX:56780026-56780709:mpeak_199416|chrX_56755717_56843752_LINC01420_NR_+|	162.305	-2.38	0.960463	2.47797	0.0132131	0.12466	13.8707	33.4922	14.6906	85.2518	143.243	52.6238	184.943	192.915	478.404	144.006	135.87	468.352	7.24703	37.5712	-2.17959	0.194573	-2.37417	LINC01420	-	chrX_56753785_+;chrX_56754071_+
chrX:54576389-54576649:mpeak_199310|chrX_54556643_54586952_GNL3L_NM_+|	528.357	-2.13413	0.897219	2.37861	0.0173781	0.13985	7.70595	36.1715	9.58085	48.3861	87.4205	22.102	1621.33	975.292	1057.09	935.465	661.446	878.291	1.46312	6.37962	-1.5626	0.561816	-2.12442	GNL3L	-	chrX_54550115_+;chrX_54550136_+
chrX:53306736-53306921:mpeak_199173|chrX_53264366_53350522_IQSEC2_NM_-|	20.191	-2.27676	1.10014	2.06953	0.0384967	NA	0	2.67937	1.91617	5.76025	15.7989	4.2099	27.7414	41.5303	34.4911	33.4095	38.9706	35.7842	6.64334	23.824	-2.48733	-0.0599345	-2.4274	IQSEC2	-	chrX_53277656_-
chrX:24186008-24186216:mpeak_198216|chrX_24167761_24228309_ZFX_NM_+|	38.521	-3.39189	1.48799	2.27952	0.0226364	0.155971	0	1.33969	0	12.6726	6.31955	20.5233	24.659	21.435	52.3753	70.2751	78.9944	173.659	4.08153	12.2366	-4.88245	-1.71347	-3.16898	ZFX	-	chrX_24168088_+
chrX:19663546-19663597:mpeak_198059|chrX_19554576_19905744_SH3KBP1_NM_-|	36.6279	-3.68986	1.68974	2.18369	0.0289852	0.176701	1.54119	0	0.638724	0	0	13.6822	86.3066	66.9843	116.248	41.4738	61.089	51.5713	1.21314	26.6304	-2.64996	0.806306	-3.45626	SH3KBP1	-	chrX_19645467_-
chrX:1565816-1565958:mpeak_197359|chrX_1522382_1572655_ASMTL_NM_-|	38.6331	-2.44171	0.984513	2.48012	0.0131338	0.12429	1.54119	1.33969	2.55489	3.45615	7.37281	3.68367	87.8478	85.7399	133.493	57.6025	40.0238	38.9416	1.77014	10.6267	-1.41675	1.169	-2.58575	ASMTL	-	chrX_1447012_-
chr9:101551227-101551383:mpeak_193405|chr9_101498905_101558794_ANKS6_NM_-|	27.4338	-2.9605	1.19875	2.46966	0.013524	0.126056	0	1.33969	1.91617	3.45615	9.47933	12.1035	49.3181	44.2097	68.3434	25.3451	36.8641	76.8308	3.01708	18.0085	-2.94306	0.219347	-3.16241	ANKS6	-	chr9_98789077_-
chr9:85645694-85645914:mpeak_191924|chr9_85597697_85678043_RASEF_NM_-|	106.458	-3.00152	1.06566	2.81659	0.00485359	0.0829749	1.54119	4.01906	1.27745	51.8423	22.1184	7.89357	204.978	125.931	132.855	228.106	218.025	278.906	1.47439	11.2897	-3.58148	-0.644665	-2.93681	RASEF	-	chr9_83030895_-
chr9:3491502-3491603:mpeak_189197|chr9_3225280_3526001_RFX3_NM_-|	11.9128	-3.72482	1.53232	2.43084	0.0150638	NA	0	0	0.638724	5.76025	6.31955	3.68367	16.9531	17.4159	28.7426	9.21641	27.3847	26.8381	3.03616	24.8481	-4.62525	-0.00747158	-4.61778	RFX3	-	chr9_3491552_-
chr9:134396184-134396234:mpeak_196594|chr9_134378288_134398318_POMT1_NM_+|	41.9052	-4.25206	1.56148	2.7231	0.00646731	0.0929588	0	0	0	0	2.10652	6.84109	87.8478	72.3431	101.557	73.7313	50.5564	107.879	#DIV/0!	5.78095	-Inf	0.173019	-Inf	POMT1	-	chr9_131520819_+
chr9:125645477-125645588:mpeak_195204|chr9_125612101_125667562_RC3H2_NM_-|	53.7676	-5.03735	1.40213	3.59264	0.000327346	0.0336138	0	0	0.638724	5.76025	3.15978	6.84109	175.696	108.515	156.487	87.5559	63.1955	37.3629	0.434804	8.37848	-4.62503	1.22818	-5.85321	RC3H2	-	chr9_122883222_-
chr9:125623397-125623447:mpeak_195193|chr9_125612101_125667562_RC3H2_NM_-|	54.2	-3.71253	1.22396	3.03323	0.00241955	0.0642251	0	4.01906	0	2.3041	6.31955	8.94605	175.696	108.515	156.487	87.5559	63.1955	37.3629	2.73593	9.33991	-2.12816	1.22818	-3.35634	RC3H2	-	chr9_122861080_-
chr8:67968781-67968843:mpeak_182892|chr8_67955552_67974562_COPS5_NM_-|	45.2288	-3.56846	1.48869	2.39706	0.0165274	0.137096	0	0	1.27745	1.15205	5.26629	9.99852	66.2712	53.5875	176.288	54.1464	63.1955	111.562	1.29407	7.17193	-3.68384	0.371565	-4.05541	COPS5	-	chr8_67056527_-
chr8:67507051-67507101:mpeak_182821|chr8_67477060_67525484_MYBL1_NM_-|	16.7274	-4.54336	1.86764	2.43268	0.0149875	NA	0	0	0	0	0	9.47228	41.6121	34.8319	32.5749	38.0177	21.0652	23.1545	#DIV/0!	34.5547	-Inf	0.406713	-Inf	MYBL1	-	chr8_66594825_-
chr8:42387386-42387436:mpeak_181744|chr8_42275485_42397356_SLC20A2_NM_-|	18.5816	-4.70613	1.58688	2.96564	0.00302052	NA	0	0	0	1.15205	3.15978	8.41981	36.9886	25.454	49.8204	25.3451	25.2782	47.3614	#DIV/0!	12.9935	-Inf	0.196254	-Inf	SLC20A2	-	chr8_42532213_-
chr8:38177910-38178107:mpeak_181491|chr8_38133400_38239790_WHSC1L1_NM_-|	48.9027	-3.83681	1.37435	2.79173	0.0052427	0.0856344	0	1.33969	0	3.45615	3.15978	9.47228	112.507	88.4193	79.2017	88.7079	96.8998	103.669	1.43472	5.56153	-3.58604	-0.046364	-3.53967	WHSC1L1	-	chr8_38320503_-
chr8:23294185-23294235:mpeak_180716|chr8_23290667_23315244_ENTPD4_NM_-|	103.396	-4.99285	1.66803	2.99326	0.00276012	0.0670037	0	0	0	0	0	8.94605	308.238	226.407	263.154	179.72	145.35	108.931	#DIV/0!	6.18389	-Inf	0.878328	-Inf	ENTPD4	-	chr8_23436672_-
chr8:144566565-144566615:mpeak_188623|chr8_144520257_144623620_ZC3H3_NM_-|	11.1372	-4.53784	1.94638	2.33143	0.0197307	NA	0	0	0	0	0	8.41981	20.0355	22.7747	31.9362	11.5205	24.2249	14.7347	#DIV/0!	50.0384	-Inf	0.566287	-Inf	ZC3H3	-	chr8_143484425_-
chr8:144339748-144339882:mpeak_188576|chr8_144328990_144341944_ZFP41_NM_+|	59.8027	-1.89786	0.830034	2.28648	0.0222259	0.154825	0	6.69843	2.55489	14.9767	9.47933	7.36733	115.589	120.572	120.719	93.3161	104.273	122.087	3.88926	9.95487	-1.78204	0.158828	-1.94087	ZFP41	-	chr8_143257629_+
chr7:94557395-94557626:mpeak_175163|chr7_94536948_94919402_PPP1R9A_NM_+|	107.142	-2.23008	0.7383	3.02056	0.00252309	0.0651018	4.62357	5.35875	3.83234	17.2808	22.1184	23.6807	234.261	222.388	144.99	228.106	238.036	141.032	2.29617	10.3891	-2.19098	-0.0132124	-2.17777	PPP1R9A	-	chr7_94928136_+
chr7:87530266-87530319:mpeak_174724|chr7_87505543_87536502_DBF4_NM_+|	23.96	-3.69733	1.6913	2.18608	0.0288094	0.176007	0	0	0	1.15205	0	7.36733	36.9886	30.8128	56.8464	56.4505	30.5445	67.3585	#DIV/0!	8.2791	-Inf	-0.308381	-Inf	DBF4	-	chr7_87901024_+
chr7:38773972-38774216:mpeak_172265|chr7_38765926_38948800_VPS41_NM_-|	142.414	-1.93449	0.957008	2.02139	0.0432391	0.218864	1.54119	12.0572	3.19362	8.06436	24.2249	6.31486	470.063	241.144	317.446	251.147	188.533	185.236	1.63243	6.17749	-1.20098	0.719021	-1.92	VPS41	-	chr7_38734401_-
chr7:148858850-148858988:mpeak_178922|chr7_148823507_148875739_ZNF398_NM_+|	53.7179	-2.34221	0.850288	2.7546	0.00587634	0.0894902	0	4.01906	3.19362	11.5205	13.6924	6.84109	95.5538	139.327	106.028	87.5559	90.5802	86.303	3.17358	12.1215	-2.1519	0.366452	-2.51835	ZNF398	-	chr7_149161798_+
chr7:138179783-138179915:mpeak_178159|chr7_138145078_138269486_TRIM24_NM_+|	55.2501	-1.81739	0.908885	1.99958	0.0455456	0.224975	0	5.35875	3.83234	4.6082	9.47933	6.84109	152.578	129.95	111.138	118.661	63.1955	57.3599	3.50212	8.74881	-1.18717	0.718651	-1.90582	TRIM24	-	chr7_138495088_+
chr7:111197024-111197247:mpeak_176693|chr7_110303777_111202573_IMMP2L_NM_-|	29.0153	-2.21768	1.10863	2.00038	0.0454596	0.224833	12.3295	8.03812	1.27745	28.8013	25.2782	12.6297	49.3181	22.7747	80.4792	23.041	25.2782	58.9387	14.1868	62.1951	-1.62385	0.508406	-2.13225	IMMP2L	-	chr7_111557087_-
chr7:99749989-99750358:mpeak_175620|chr7_99746529_99751489_LAMTOR4_NM_+|	319.171	-2.69431	0.80434	3.34971	0.000808957	0.0451455	4.62357	21.435	6.38724	40.3218	47.3966	19.997	1035.68	708.694	684.073	557.593	359.161	344.686	1.33607	8.53909	-1.73112	0.944963	-2.67608	LAMTOR4	-	chr7_100152720_+
chr6:56869413-56869583:mpeak_163475|chr6_56819772_56890879_BEND6_NM_+|	613.14	-3.38596	1.6478	2.05483	0.039895	0.209905	3197.97	1264.66	892.936	997.676	609.837	382.575	3.08238	0	8.94213	0	0	0	29692.5	#DIV/0!	1.42821	Inf	-Inf	BEND6	-	chr6_57004732_+
chr6:53769429-53769546:mpeak_163288|chr6_53659777_53787432_LRRC1_NM_+|	60.9674	-4.4729	1.63223	2.74035	0.00613732	0.0909762	0	1.33969	0	1.15205	5.26629	26.8381	64.73	71.0034	164.791	141.702	116.912	137.874	1.33735	8.38776	-4.63367	-0.399798	-4.23387	LRRC1	-	chr6_53904657_+
chr6:53733971-53734038:mpeak_163279|chr6_53659777_53787432_LRRC1_NM_+|	59.993	-3.0412	1.31423	2.31405	0.020665	0.149989	0	1.33969	0.638724	4.6082	5.26629	11.051	64.73	71.0034	164.791	141.702	116.912	137.874	0.98748	5.27771	-3.40285	-0.399798	-3.00305	LRRC1	-	chr6_53869225_+
chr6:52141521-52141699:mpeak_163118|chr6_52129584_52149679_MCM3_NM_-|	286.013	-2.70175	0.590532	4.57511	4.75961e-06	0.00755278	7.70595	12.0572	11.497	73.7313	83.2074	60.5174	422.286	502.382	631.698	525.335	428.676	673.058	2.00853	13.3649	-2.79833	-0.0640947	-2.73423	MCM3	-	chr6_52276851_-
chr6:38474598-38474670:mpeak_162318|chr6_38142958_38607924_BTBD9_NM_-|	35.4658	-2.09806	0.978392	2.14439	0.0320013	0.185876	6.16476	2.67937	0.638724	9.21641	10.5326	4.73614	61.6476	61.6256	107.306	48.3861	56.876	55.7812	4.11263	15.2041	-1.36851	0.517811	-1.88632	BTBD9	-	chr6_38506837_-
chr6:38435502-38435758:mpeak_162310|chr6_38142958_38607924_BTBD9_NM_-|	37.2197	-1.92597	0.885848	2.17415	0.0296939	0.178925	7.70595	4.01906	3.83234	5.76025	23.1717	10.5248	61.6476	61.6256	107.306	48.3861	56.876	55.7812	6.74709	24.5007	-1.34267	0.517811	-1.86048	BTBD9	-	chr6_38467723_-
chr6:33677855-33677936:mpeak_161676|chr6_33665527_33679528_UQCC2_NM_-|	194.78	-3.2123	0.915784	3.5077	0.000451997	0.0371845	16.9531	40.1906	10.8583	114.053	174.841	34.7317	451.569	267.937	560.799	275.34	195.906	194.182	5.31139	48.6342	-2.25068	0.944133	-3.19481	UQCC2	-	chr6_33710106_-
chr6:2964992-2965138:mpeak_159043|chr6_2948933_2972399_SERPINB6_NM_-|	101.532	-4.6486	1.47535	3.15084	0.00162801	0.0572185	0	1.33969	0.638724	1.15205	3.15978	21.5758	294.367	184.877	293.174	178.568	125.338	114.194	0.384198	6.19173	-3.70985	0.885536	-4.59538	SERPINB6	-	chr6_2964808_-
chr6:152292767-152293176:mpeak_168896|chr6_152011630_152419866_ESR1_NM_+|	934.56	-2.12385	1.07878	1.96876	0.0489812	0.234434	9.24714	48.2287	6.38724	77.1874	187.48	24.7332	1733.84	1738.91	1822.92	1496.51	1963.27	2106	1.20595	5.19963	-2.18001	-0.0717743	-2.10824	ESR1	-	chr6_151971783_+
chr6:152172965-152173197:mpeak_168816|chr6_152011630_152419866_ESR1_NM_+|	940.216	-2.16325	0.882477	2.45134	0.0142325	0.128579	9.24714	49.5684	15.3294	55.2984	208.545	83.1456	1733.84	1738.91	1822.92	1496.51	1963.27	2106	1.4001	6.23432	-2.22647	-0.0717743	-2.1547	ESR1	-	chr6_151851977_+
chr6:136590272-136590491:mpeak_167397|chr6_136582253_136610989_BCLAF1_NM_-|	299.147	-1.73994	0.596667	2.9161	0.0035444	0.0737631	30.8238	16.0762	14.0519	47.2341	44.2369	39.4679	853.819	533.195	655.969	548.376	420.25	386.259	2.98348	9.6642	-1.10315	0.592507	-1.69566	BCLAF1	-	chr6_136269238_-
chr5:463356-463461:mpeak_147839|chr5_443333_466841_EXOC3_NM_+|	166.693	-1.42048	0.679919	2.08919	0.0366905	0.200145	16.9531	5.35875	23.6328	31.1054	24.2249	46.3089	349.85	350.998	325.749	307.598	264.368	254.173	4.47543	12.3029	-1.14549	0.313414	-1.4589	EXOC3	-	chr5_463346_+
chr5:141311047-141311176:mpeak_156570|chr5_141303384_141318085_KIAA0141_NM_+|	68.7003	-2.7213	0.74846	3.63586	0.000277053	0.0321799	1.54119	8.03812	3.19362	19.5849	38.9706	27.3644	134.084	117.892	102.834	125.574	133.764	111.562	3.59993	23.1652	-2.7499	-0.0639812	-2.68592	KIAA0141	-	chr5_141931595_+
chr5:129017195-129017245:mpeak_155015|chr5_128796102_129072759_ADAMTS19_NM_+|	36.9981	-3.3399	1.60177	2.08513	0.0370578	0.201216	0	0	0.638724	0	2.10652	8.41981	60.1064	53.5875	102.196	49.5382	54.7695	112.615	0.88757	7.27886	-4.04267	-0.00688618	-4.03578	ADAMTS19	-	chr5_129681578_+
chr5:121321760-121321919:mpeak_154478|chr5_121297655_121362636_SRFBP1_NM_+|	73.5719	-4.50908	1.4261	3.16182	0.00156787	0.0564166	0	1.33969	0	6.9123	8.42607	3.15743	203.437	192.915	123.912	171.656	108.486	62.6223	0.772503	5.39608	-3.78723	0.602031	-4.38926	SRFBP1	-	chr5_121986132_+
chr5:115586119-115586343:mpeak_154306|chr5_115420672_115628147_COMMD10_NM_+|	69.0777	-2.99047	1.21613	2.459	0.0139324	0.127722	1.54119	8.03812	0.638724	11.5205	31.5978	11.5772	126.378	50.9081	265.709	91.012	62.1423	167.87	2.30658	17.0378	-2.4203	0.464607	-2.88491	COMMD10	-	chr5_116250471_+
chr5:112220889-112221069:mpeak_154014|chr5_112196884_112227299_SRP19_NM_+|	126.643	-2.55955	0.813656	3.14574	0.00165666	0.057429	33.9062	14.7366	21.0779	67.971	30.5445	49.4664	394.545	344.299	215.889	193.545	95.8465	57.8862	7.30263	42.612	-1.08576	1.45901	-2.54477	SRP19	-	chr5_112885352_+
chr4:85507887-85508250:mpeak_142181|chr4_85504056_85569709_CDS1_NM_+|	506.097	-2.04966	1.04384	1.96357	0.0495797	0.236045	12.3295	36.1715	5.10979	40.3218	82.1542	9.47228	1229.87	1136.05	1309.38	798.371	607.73	806.197	1.45868	5.96431	-1.29938	0.732319	-2.03169	CDS1	-	chr4_84587097_+
chr4:79717895-79718112:mpeak_141878|chr4_79697531_79831763_BMP2K_NM_+|	9.87525	-3.32406	1.5016	2.21368	0.0268506	NA	3.08238	5.35875	3.19362	4.6082	23.1717	4.2099	23.1178	16.0762	19.1617	2.3041	13.6924	0.526238	19.9376	193.611	-1.45917	1.82043	-3.2796	BMP2K	-	chr4_78796958_+
chr4:74121001-74121051:mpeak_141450|chr4_73942007_74124502_ANKRD17_NM_-|	60.5701	-3.16773	1.57997	2.00494	0.0449698	0.22342	1.54119	0	0	0	4.21303	13.6822	66.2712	89.759	95.8085	112.901	113.752	228.914	1.83593	5.89219	-3.53746	-0.855162	-2.6823	ANKRD17	-	chr4_73255285_-
chr4:42548741-42548793:mpeak_140431|chr4_42415030_42659122_ATP8A1_NM_-|	11.8401	-3.45821	1.70075	2.03335	0.042017	NA	0	1.33969	0	4.6082	9.47933	2.10495	7.70595	20.0953	28.7426	19.5849	8.42607	39.9941	7.10787	23.8107	-3.59536	-0.266272	-3.32908	ATP8A1	-	chr4_42546727_-
chr4:156637455-156637505:mpeak_146475|chr4_156587861_156651181_GUCY1A3_NM_+|	31.5298	-4.82818	1.56525	3.08461	0.00203816	0.0610814	0	0	0	3.45615	1.05326	8.41981	69.3535	46.889	85.589	59.9066	28.438	75.252	#DIV/0!	7.90311	-Inf	0.303008	-Inf	GUCY1A3	-	chr4_155716353_+
chr4:143078951-143079085:mpeak_145467|chr4_142950067_143767604_INPP4B_NM_-|	74.1663	-3.47467	1.66014	2.09299	0.0363499	0.199212	0	1.33969	0	5.76025	13.6924	0	147.954	68.324	145.629	193.545	152.723	161.029	1.11052	5.75186	-3.86	-0.487208	-3.37279	INPP4B	-	chr4_142157876_-
chr4:108931314-108931431:mpeak_143941|chr4_108910869_108955394_HADH_NM_+|	144.274	-4.15001	1.14897	3.61195	0.000303897	0.0327091	0	6.69843	0	29.9533	38.9706	11.5772	289.744	208.991	429.222	192.392	179.054	344.686	2.16554	11.2411	-3.58711	0.373832	-3.96095	HADH	-	chr4_108010209_+;chr4_108010295_+
chr3:48967287-48967459:mpeak_127707|chr3_48956280_49020631_ARIH2_NM_+|	290.042	-1.41513	0.677645	2.0883	0.0367707	0.200411	9.24714	34.8319	20.4392	24.1931	45.2901	49.4664	651.923	562.668	731.977	473.493	358.108	518.871	3.31445	8.808	-0.882573	0.52747	-1.41004	ARIH2	-	chr3_48929938_+
chr3:185317327-185317528:mpeak_136754|chr3_185304030_185347569_SENP2_NM_+|	46.9311	-2.18132	0.983554	2.21779	0.026569	0.168712	1.54119	14.7366	4.47107	29.9533	73.7281	18.9446	78.6007	40.1906	62.5949	91.012	71.6216	75.7783	11.439	51.4345	-2.56316	-0.394391	-2.16877	SENP2	-	chr3_185599650_+
chr3:17639939-17640083:mpeak_125625|chr3_17202748_17782399_TBC1D5_NM_-|	74.8189	-2.1037	0.909457	2.31314	0.0207149	0.150132	10.7883	1.33969	2.55489	16.1287	15.7989	17.8921	121.754	103.156	220.36	99.0764	99.0063	189.972	3.29753	12.8383	-1.76258	0.198419	-1.961	TBC1D5	-	chr3_17598514_-
chr3:17503124-17503503:mpeak_125593|chr3_17202748_17782399_TBC1D5_NM_-|	74.1539	-2.14211	0.930407	2.30233	0.0213164	0.151822	1.54119	8.03812	2.55489	8.06436	17.9054	18.4183	121.754	103.156	220.36	99.0764	99.0063	189.972	2.72514	11.4386	-1.87109	0.198419	-2.06951	TBC1D5	-	chr3_17461775_-
chr3:16502905-16502963:mpeak_125543|chr3_16358739_16555222_RFTN1_NM_-|	35.1538	-3.06387	1.2612	2.42933	0.0151267	0.132034	0	0	2.55489	1.15205	9.47933	4.73614	120.213	75.0225	72.1758	50.6902	61.089	24.7332	2.86626	11.2572	-2.58855	0.970027	-3.55858	RFTN1	-	chr3_16461373_-
chr3:156867538-156867602:mpeak_134725|chr3_156864396_156878549_CCNL1_NM_-|	3.47537	-6.12073	2.09441	2.92241	0.00347335	NA	1.54119	5.35875	1.27745	2.3041	9.47933	2.10495	7.70595	9.37781	2.55489	0	0	0	41.6392	#DIV/0!	-0.764167	Inf	-Inf	CCNL1	-	chr3_157149749_-
chr3:156867085-156867384:mpeak_134724|chr3_156864396_156878549_CCNL1_NM_-|	12.8257	-5.1218	1.6684	3.06988	0.00214142	NA	21.5767	41.5303	8.94213	19.5849	14.7456	27.8906	7.70595	9.37781	2.55489	0	0	0	366.874	#DIV/0!	0.211576	Inf	-Inf	CCNL1	-	chr3_157149389_-;chr3_157149544_-
chr3:148782032-148782151:mpeak_133915|chr3_148750159_148804341_HLTF_NM_-|	64.3241	-2.77854	1.16004	2.3952	0.0166111	0.137441	0	1.33969	1.27745	5.76025	14.7456	10.5248	104.801	52.2478	134.132	172.808	112.699	161.555	1.3482	6.94102	-3.56763	-0.618558	-2.94908	HLTF	-	chr3_149064249_-
chr3:129172153-129172215:mpeak_132391|chr3_129158878_129239018_IFT122_NM_+|	45.1529	-4.29232	1.67792	2.55812	0.0105239	0.113937	0	1.33969	0	6.9123	11.5858	0	106.342	83.0606	107.944	89.86	97.9531	36.8367	1.35164	12.3513	-3.78741	0.40447	-4.19188	IFT122	-	chr3_129453371_+
chr3:123006014-123006085:mpeak_131720|chr3_123003583_123167392_ADCY5_NM_-|	62.0354	-2.18944	1.07487	2.03693	0.0416573	0.214275	1.54119	9.37781	2.55489	6.9123	29.4912	8.94605	75.5183	92.4384	222.276	73.7313	123.231	98.4065	3.45279	15.3535	-1.75092	0.401815	-2.15274	ADCY5	-	chr3_123287179_-
chr3:113310095-113310145:mpeak_130968|chr3_113251217_113346492_SIDT1_NM_+|	57.1681	-2.8031	1.21081	2.31506	0.0206099	0.149713	3.08238	0	0.638724	2.3041	3.15978	13.156	107.883	95.1177	142.435	107.141	104.273	106.826	1.61583	5.85088	-2.32304	0.118306	-2.44134	SIDT1	-	chr3_113591298_+
chr3:113257291-113257445:mpeak_130943|chr3_113251217_113346492_SIDT1_NM_+|	57.5397	-2.87983	1.06811	2.69619	0.0070137	0.0962359	3.08238	1.33969	0	9.21641	7.37281	5.78862	107.883	95.1177	142.435	107.141	104.273	106.826	1.92021	7.03176	-2.33928	0.118306	-2.45758	SIDT1	-	chr3_113538580_+
chr21:46523739-46523790:mpeak_120947|chr21_46494492_46645461_ADARB1_NR_+mpeak_120947|chr21_46494492_46641932_ADARB1_NM_+||	8.69227	-4.28973	2.0249	2.11849	0.0341337	NA	0	0	0	0	0	8.41981	26.2002	17.4159	10.2196	11.5205	12.6391	17.8921	#DIV/0!	60.0675	-Inf	0.3564	-Inf	ADARB1	-	chr21_45103892_+
chr21:34605186-34605573:mpeak_119752|chr21_34602199_34635097_IFNAR2_NM_+|	32.1393	-1.49598	0.737178	2.02934	0.042424	0.216444	4.62357	6.69843	5.10979	12.6726	22.1184	13.156	55.4828	46.889	55.569	50.6902	63.1955	49.4664	10.4038	29.3519	-1.54495	-0.0486012	-1.49635	IFNAR2	-	chr21_33232931_+;chr21_33233130_+
chr21:22564497-22564760:mpeak_119333|chr21_22370632_22910166_NCAM2_NM_+|	38.6515	-2.87114	0.989469	2.9017	0.00371149	0.0751074	4.62357	5.35875	3.83234	21.889	38.9706	9.47228	66.2712	40.1906	116.886	42.6259	40.0238	73.6733	6.18526	44.9913	-2.34798	0.514764	-2.86274	NCAM2	-	chr21_21192262_+
chr20:36712761-36712818:mpeak_116107|chr20_36661947_36718127_RPRD1B_NM_+|	17.5598	-4.78613	1.5604	3.06724	0.00216046	NA	0	0	0	3.45615	8.42607	2.63119	38.5297	17.4159	50.4592	21.889	34.7575	33.153	#DIV/0!	16.162	-Inf	0.244784	-Inf	RPRD1B	-	chr20_38084408_+
chr20:30793456-30793506:mpeak_115439|chr20_30785485_30795546_PLAGL2_NM_-|	39.0267	-3.88895	1.69803	2.29027	0.0220054	0.154081	0	0	0	0	0	8.41981	69.3535	76.3621	73.4532	69.123	73.7281	97.8803	#DIV/0!	10.4928	-Inf	-0.135381	-Inf	PLAGL2	-	chr20_32205631_-
chr20:2892292-2892342:mpeak_114001|chr20_2844840_3018704_PTPRA_NM_+|	67.008	-2.60149	1.23546	2.10569	0.035231	0.195785	0	5.35875	0	1.15205	7.37281	12.6297	112.507	131.289	188.423	92.1641	106.379	146.82	3.71946	6.12531	-1.981	0.323648	-2.30465	PTPRA	-	chr20_2911688_+
chr20:21187446-21187502:mpeak_115095|chr20_21106623_21227116_KIZ_NM_+|	6.52263	-4.4658	1.72572	2.58779	0.00965948	NA	0	1.33969	0	9.21641	9.47933	4.2099	7.70595	8.03812	12.7745	14.9767	8.42607	2.10495	14.0928	89.799	-4.09574	0.160968	-4.2567	KIZ	-	chr20_21206862_+
chr2:97020759-97020885:mpeak_104163|chr2_97001478_97039029_NCAPH_NM_+|	20.4332	-4.03055	1.4218	2.83483	0.00458501	NA	0	1.33969	0	6.9123	10.5326	9.99852	29.2826	29.4731	30.6587	32.2574	27.3847	67.3585	4.49487	21.6089	-4.35649	-0.506256	-3.85024	NCAPH	-	chr2_96355159_+
chr2:64162636-64162779:mpeak_102053|chr2_64120669_64246214_VPS54_NM_-|	13.5053	-2.81368	1.13717	2.47428	0.0133504	NA	3.08238	2.67937	0.638724	10.3685	22.1184	9.47228	29.2826	12.0572	14.0519	23.041	17.9054	17.3659	11.5549	71.956	-2.71274	-0.0741295	-2.63861	VPS54	-	chr2_63935502_-
chr2:55880800-55880915:mpeak_101520|chr2_55863527_55921045_PNPT1_NM_-|	39.9339	-4.91293	1.59083	3.08829	0.00201313	0.0609456	0	0	0	2.3041	0	6.84109	103.26	71.0034	126.467	71.4271	32.651	65.2535	#DIV/0!	8.10114	-Inf	0.828619	-Inf	PNPT1	-	chr2_55653674_-
chr2:37382023-37382222:mpeak_100061|chr2_37334538_37384190_EIF2AK2_NM_-|	91.9806	-2.75798	0.723914	3.80982	0.000139066	0.0247952	6.16476	9.37781	7.02596	73.7313	69.5151	43.1515	127.919	95.1177	180.12	122.117	145.35	224.177	5.59796	37.9131	-3.046	-0.286275	-2.75973	EIF2AK2	-	chr2_37154959_-
chr2:29013499-29013678:mpeak_99463|chr2_28974613_29022064_PPP1CB_NM_+|	253.748	-2.37988	1.08169	2.20016	0.0277956	0.172936	6.16476	20.0953	1.91617	26.4972	38.9706	52.0976	352.932	274.636	949.782	301.837	268.581	751.468	1.7863	8.89375	-2.06091	0.254905	-2.31582	PPP1CB	-	chr2_28790778_+
chr2:25782259-25782411:mpeak_98903|chr2_25600422_25896516_DTNB_NM_-|	23.2236	-1.9602	0.873771	2.24338	0.0248723	0.163391	1.54119	13.3969	5.74851	12.6726	15.7989	22.6282	38.5297	38.8509	47.9043	36.8656	21.0652	23.6807	16.5116	62.6133	-1.30462	0.618368	-1.92299	DTNB	-	chr2_25559478_-
chr2:15745633-15745752:mpeak_98249|chr2_15731744_15770899_DDX1_NM_+|	62.858	-3.81993	1.8694	2.0434	0.0410126	0.212717	0	1.33969	0	9.21641	13.6924	0	57.024	48.2287	210.14	78.3395	66.3553	269.96	1.2743	8.28717	-4.09593	-0.394761	-3.70117	DDX1	-	chr2_15605622_+
chr2:149952399-149952475:mpeak_107560|chr2_149894980_150071059_LYPD6B_NM_+|	4.3284	-3.67825	1.69385	2.17153	0.029891	NA	1.54119	1.33969	0	4.6082	6.31955	3.15743	9.24714	2.67937	11.497	5.76025	3.15978	2.63119	18.4486	121.937	-2.2896	1.01991	-3.30951	LYPD6B	-	chr2_149095977_+
chr2:142887163-142887552:mpeak_107338|chr2_140990895_142889270_LRP1B_NM_-|	91.5907	-1.92482	0.900949	2.13643	0.0326441	0.187913	30.8238	49.5684	33.2136	276.492	405.505	251.542	6.16476	6.69843	4.47107	4.6082	7.37281	22.6282	655.383	2697.37	-3.03867	-0.997532	-2.04114	LRP1B	-	chr2_142129830_-
chr19:46294668-46294720:mpeak_95515|chr19_46287548_46296060_DMWD_NM_-|	47.3474	-3.65733	1.20156	3.04382	0.00233595	0.0638554	1.54119	0	0.638724	10.3685	10.5326	6.84109	100.177	91.0987	71.537	99.0764	91.6335	84.7243	1.24418	10.0721	-3.66974	-0.0676707	-3.60207	DMWD	-	chr19_45791369_-
chr19:41837967-41838033:mpeak_95016|chr19_41837115_41859838_TGFB1_NM_-|	21.2578	-5.13462	1.41511	3.62843	0.000285148	NA	1.54119	0	0	2.3041	7.37281	7.36733	43.1533	52.2478	70.2596	21.889	24.2249	24.7332	2.79099	24.0578	-3.46717	1.22545	-4.69262	TGFB1	-	chr19_41332030_-;chr19_41332074_-
chr19:34692107-34692252:mpeak_94014|chr19_34663351_34718269_LSM14A_NM_+|	99.975	-2.83472	1.22521	2.31365	0.0206868	0.150031	3.08238	2.67937	0	5.76025	18.9587	19.4708	110.966	95.1177	285.509	161.287	134.817	362.052	1.75809	6.71417	-2.93913	-0.420966	-2.51817	LSM14A	-	chr19_34201287_+;chr19_34201342_+
chr19:12764141-12764191:mpeak_92431|chr19_12757546_12777591_MAN2B1_NM_-|	65.6096	-4.58714	1.59561	2.87485	0.00404225	0.0773709	0	1.33969	0	0	1.05326	11.5772	174.154	148.705	192.895	69.123	100.06	88.408	0.779259	7.35498	-3.23694	1.0016	-4.23855	MAN2B1	-	chr19_12653308_-
chr17:61888203-61888253:mpeak_85371|chr17_61851548_61895053_DDX42_NM_+|	129.714	-3.42508	1.26631	2.70479	0.00683486	0.0953071	0	0	1.91617	4.6082	22.1184	28.9431	200.355	121.911	195.449	300.685	213.812	466.773	1.11036	5.67323	-4.8606	-0.92249	-3.9381	DDX42	-	chr17_63810921_+
chr17:48813913-48813975:mpeak_82964|chr17_48796925_48827861_LUC7L3_NM_+|	192.686	-1.19553	0.537168	2.22562	0.0260398	0.166852	7.70595	10.7175	10.8583	44.93	52.6629	48.9401	263.543	222.388	196.088	499.99	459.221	495.19	4.29339	10.0751	-2.32315	-1.09254	-1.23061	LUC7L3	-	chr17_50736610_+
chr17:43148473-43148524:mpeak_82244|chr17_43138666_43182986_NMT1_NM_+|	51.3538	-5.309	1.88442	2.81731	0.00484284	0.0829749	0	0	0	0	0	15.2609	98.6362	81.7209	175.649	81.7956	66.3553	96.8278	#DIV/0!	18.6884	-Inf	0.539245	-Inf	NMT1	-	chr17_45071167_+
chr17:40721496-40721616:mpeak_81867|chr17_40719077_40723564_MLX_NM_+|	34.055	-4.52736	1.54066	2.93858	0.00329718	0.0716766	0	0	0	6.9123	3.15978	4.2099	58.5652	40.1906	97.7247	42.6259	42.1303	113.141	#DIV/0!	7.21686	-Inf	-0.0103664	-Inf	MLX	-	chr17_42569591_+
chr17:35368696-35368997:mpeak_81186|chr17_35306174_35413900_AATF_NM_+|	116.493	-2.31283	0.864404	2.67563	0.00745887	0.0987639	3.08238	9.37781	1.27745	18.4328	18.9587	8.41981	298.991	243.823	233.773	178.568	145.35	237.86	1.76898	8.15471	-1.73757	0.467149	-2.20472	AATF	-	chr17_37011584_+
chr17:2208357-2208602:mpeak_77748|chr17_2207236_2226948_SRR_NM_+|	23.9181	-1.91524	0.930811	2.0576	0.0396285	0.209197	3.08238	6.69843	2.55489	4.6082	13.6924	12.6297	44.6945	40.1906	57.4851	40.3218	21.0652	39.9941	8.66453	30.5089	-1.32618	0.48986	-1.81604	SRR	-	chr17_2305217_+
chr17:16170469-16170543:mpeak_79331|chr17_16120508_16229113_PIGL_NM_+|	5.50773	-5.23395	2.06042	2.54024	0.0110778	NA	0	0	0	1.15205	0	10.5248	7.70595	9.37781	17.8843	5.76025	7.37281	6.31486	#DIV/0!	90.0622	-Inf	0.84642	-Inf	PIGL	-	chr17_16267229_+
chr16:8902108-8902310:mpeak_70995|chr16_8891669_8941580_PMM2_NM_+|	142.732	-1.66976	0.831923	2.00711	0.0447376	0.222597	6.16476	40.1906	12.7745	61.0587	77.9411	90.5129	254.296	135.308	247.825	357.136	224.344	205.233	9.27629	29.1736	-1.95662	-0.303571	-1.65305	PMM2	-	chr16_8808365_+
chr16:53824754-53824898:mpeak_74156|chr16_53737874_54145673_FTO_NM_+|	28.568	-5.43609	1.71551	3.16878	0.00153079	0.0562301	0	0	0	0	7.37281	12.1035	36.9886	41.5303	103.473	27.6492	41.0771	72.6209	#DIV/0!	20.6686	-Inf	0.364633	-Inf	FTO	-	chr16_53791036_+
chr16:30778493-30778662:mpeak_73391|chr16_30772932_30785258_RNF40_NM_+|	161.008	-1.47486	0.603993	2.44185	0.0146121	0.130119	18.4943	28.1334	23.6328	31.1054	60.0357	59.9911	285.12	271.956	405.589	256.907	201.172	289.957	7.29853	20.2039	-1.10503	0.363926	-1.46895	RNF40	-	chr16_30767347_+
chr16:15119063-15119113:mpeak_71643|chr16_15068591_15232735_PDXDC1_NM_+|	6.04182	-3.98875	1.9859	2.00854	0.0445863	NA	0	0	0	0	1.05326	8.94605	12.3295	12.0572	5.10979	10.3685	12.6391	9.99852	#DIV/0!	45.443	-Inf	-0.162189	-Inf	PDXDC1	-	chr16_15025284_+
chr16:12008023-12008105:mpeak_71374|chr16_11967028_12010519_GSPT1_NM_-|	809.188	-1.64516	0.789997	2.08249	0.0372974	0.202042	52.4005	104.496	19.1617	85.2518	161.149	86.303	2202.36	1500.45	2011.34	1292.6	1155.42	1039.32	3.08108	9.5403	-0.918188	0.712409	-1.6306	GSPT1	-	chr16_11914198_-
chr16:12004446-12004510:mpeak_71370|chr16_11967028_12010519_GSPT1_NM_-|	798.352	-1.73128	0.483574	3.58017	0.000343368	0.0341614	35.4474	49.5684	40.2396	70.2751	97.9531	85.2506	2202.36	1500.45	2011.34	1292.6	1155.42	1039.32	2.19202	7.26853	-1.01699	0.712409	-1.7294	GSPT1	-	chr16_11910599_-
chr15:89841727-89841948:mpeak_69035|chr15_89787193_89859627_FANCI_NM_+|	159.625	-1.66298	0.739051	2.25016	0.0244386	0.162024	1.54119	9.37781	7.66468	9.21641	24.2249	19.997	372.968	251.861	358.963	269.58	266.474	323.636	1.88899	6.216	-1.52384	0.194535	-1.71838	FANCI	-	chr15_89298593_+
chr15:89013007-89013156:mpeak_68944|chr15_89010683_89021102_MRPS11_NM_+|	103.889	-2.07383	0.805525	2.57451	0.0100383	0.11198	1.54119	5.35875	3.83234	13.8246	7.37281	8.94605	269.708	170.14	295.729	154.375	125.338	190.498	1.45903	6.41063	-1.48989	0.64557	-2.13546	MRPS11	-	chr15_88469858_+
chr15:66796365-66796457:mpeak_66881|chr15_66791990_66797193_RPL4_NM_-|	1412.49	-3.00921	0.901962	3.33629	0.000849036	0.0454376	20.0355	38.8509	14.6906	179.72	117.965	23.6807	4116.52	2753.06	3841.28	2019.55	1907.45	1917.09	0.686939	5.49899	-2.12689	0.874026	-3.00091	RPL4	-	chr15_66504033_-;chr15_66504068_-
chr15:60685835-60686217:mpeak_66178|chr15_60639888_60690185_ANXA2_NM_-|	762.083	-2.99647	0.703409	4.25992	2.04498e-05	0.0138909	7.70595	26.7937	10.8583	100.228	75.8346	43.6778	2042.08	1548.68	1922.56	1035.69	956.359	1374.53	0.822699	6.52711	-2.27637	0.711633	-2.98801	ANXA2	-	chr15_60393932_-;chr15_60393963_-
chr14:96981699-96981876:mpeak_62206|chr14_96968712_97031291_PAPOLA_NM_+|	273.692	-2.09529	0.845523	2.4781	0.0132082	0.12466	9.24714	17.4159	8.30341	21.889	38.9706	54.7288	536.334	334.922	875.69	413.586	266.474	706.738	2.00158	8.3349	-1.72495	0.333077	-2.05803	PAPOLA	-	chr14_96515486_+
chr14:20788333-20788419:mpeak_55641|chr14_20779911_20801471_CCNB1IP1_NM_-|	53.1596	-3.99358	1.59029	2.51123	0.0120311	0.120003	0	1.33969	0	0	2.10652	11.5772	118.672	101.816	125.19	95.6202	55.8227	125.771	1.16266	7.40426	-3.3525	0.318428	-3.67092	CCNB1IP1	-	chr14_20320228_-
chr13:98013428-98013605:mpeak_54759|chr13_97874542_98043575_MBNL2_NM_+|	54.9607	-1.96263	0.984687	1.99315	0.0462449	0.226727	6.16476	5.35875	0.638724	8.06436	18.9587	9.99852	152.578	61.6256	108.583	99.0764	120.071	68.4109	3.76789	12.8744	-1.60596	0.166723	-1.77268	MBNL2	-	chr13_97361287_+;chr13_97361306_+
chr13:42528252-42528428:mpeak_52648|chr13_42142441_42535221_VWA8_NM_-|	20.4772	-2.28178	0.919429	2.48174	0.0130742	NA	1.54119	8.03812	2.55489	19.5849	32.651	15.7871	21.5767	25.454	28.7426	21.889	30.5445	37.3629	16.0138	75.7525	-2.48694	-0.244968	-2.24198	VWA8	-	chr13_41954184_-
chr13:34396529-34396710:mpeak_52009|chr13_34392205_34540223_RFC3_NM_+|	7.7011	-3.24287	1.5505	2.0915	0.0364834	NA	4.62357	0	1.27745	9.21641	10.5326	1.57871	4.62357	22.7747	19.1617	2.3041	9.47933	6.84109	19.011	114.514	-1.85369	1.32189	-3.17558	RFC3	-	chr13_33822448_+
chr13:20425410-20425460:mpeak_50605|chr13_20399375_20437776_ZMYM5_NM_-|	30.6112	-2.84784	1.24597	2.28565	0.022275	0.154997	0	0	1.91617	1.15205	4.21303	6.84109	58.5652	69.6637	85.589	59.9066	34.7575	44.7302	2.68851	8.75658	-2.67131	0.61721	-3.28852	ZMYM5	-	chr13_19851271_-
chr12:46801473-46801538:mpeak_41948|chr12_46777458_47046172_LOC100288798_NR_+|	8.13239	-4.21122	1.60894	2.61739	0.00886047	NA	0	1.33969	0	1.15205	5.26629	5.78862	18.4943	10.7175	23.6328	13.8246	9.47933	7.89357	7.60544	39.128	-3.18774	0.760324	-3.94806	LOC100288798	-	chr12_46407739_+
chr12:29501795-29501867:mpeak_40859|chr12_29494151_29534143_ERGIC2_NM_-|	224.873	-1.94088	0.716169	2.71009	0.00672657	0.0947894	3.08238	12.0572	9.58085	35.7136	28.438	16.3134	560.993	337.601	536.528	452.756	339.149	366.262	1.72253	6.94761	-1.70266	0.30933	-2.01199	ERGIC2	-	chr12_29348866_-
chr12:22619414-22619594:mpeak_40381|chr12_22602825_22697480_C2CD5_NM_-|	44.3533	-2.34151	1.13738	2.05868	0.0395249	0.208788	0	5.35875	0	9.21641	8.42607	5.78862	66.2712	71.0034	113.054	72.5792	56.876	123.666	6.42205	9.25687	-2.12846	-0.0160045	-2.11245	C2CD5	-	chr12_22466490_-;chr12_22466508_-
chr12:13227183-13227302:mpeak_39885|chr12_13197314_13233558_KIAA1467_NM_+|	15.1626	-4.30074	1.81196	2.37353	0.0176188	NA	0	0	0	0	2.10652	12.1035	13.8707	18.7556	40.2396	38.0177	31.5978	25.2594	#DIV/0!	22.4664	-Inf	-0.380782	-Inf	KIAA1467	-	chr12_13074263_+
chr12:125440946-125441104:mpeak_50086|chr12_125432433_125473667_DHX37_NM_-|	92.615	-1.8119	0.68976	2.62686	0.00861776	0.104969	10.7883	21.435	22.3553	41.4738	54.7695	58.9387	141.789	113.873	245.909	122.117	104.273	173.659	10.8815	38.7908	-1.50755	0.32628	-1.83383	DHX37	-	chr12_124956400_-;chr12_124956481_-
chr11:78209500-78209564:mpeak_35683|chr11_78147860_78285909_NARS2_NM_-|	22.5722	-2.24712	1.05049	2.1391	0.0324274	0.187354	3.08238	6.69843	1.27745	9.21641	15.7989	12.6297	27.7414	21.435	74.7307	34.5615	26.3315	37.3629	8.92464	38.3132	-1.76733	0.334643	-2.10198	NARS2	-	chr11_78498463_-
chr11:74062580-74062630:mpeak_35150|chr11_74047799_74109510_PGM2L1_NM_-|	126.374	-3.1936	1.35759	2.35241	0.0186524	0.143473	1.54119	2.67937	0.638724	6.9123	0	19.997	439.239	304.109	131.577	246.539	198.013	165.239	0.555395	6.61933	-2.46929	0.520846	-2.99014	PGM2L1	-	chr11_74351524_-
chr11:72047677-72047727:mpeak_34865|chr11_72004659_72145728_CLPB_NM_-|	22.3562	-4.46967	1.56869	2.8493	0.00438161	0.0793857	0	0	0	0	2.10652	7.36733	52.4005	45.5493	45.3494	39.1697	36.8641	39.4679	#DIV/0!	12.3035	-Inf	0.311117	-Inf	CLPB	-	chr11_72336618_-
chr11:66571761-66571890:mpeak_34065|chr11_66512206_66610639_C11orf80_NM_+|	23.0766	-4.06367	1.70059	2.38957	0.0168683	0.138468	0	1.33969	0	0	1.05326	7.89357	66.2712	64.305	46.6268	11.5205	34.7575	43.1515	2.26805	15.0065	-2.73948	0.986579	-3.72606	C11orf80	-	chr11_66804327_+
chr11:66556623-66556677:mpeak_34057|chr11_66512206_66610639_C11orf80_NM_+|	26.3759	-2.60019	1.22518	2.12229	0.033813	0.191345	1.54119	9.37781	1.91617	2.3041	10.5326	24.207	66.2712	64.305	46.6268	11.5205	34.7575	43.1515	7.2432	41.4221	-1.52912	0.986579	-2.5157	C11orf80	-	chr11_66789229_+
chr11:63719264-63719399:mpeak_33443|chr11_63706441_63721809_NAA40_NM_+|	71.8939	-2.26257	0.906959	2.49467	0.0126073	0.122248	0	2.67937	1.91617	11.5205	18.9587	12.6297	109.424	91.0987	91.9762	205.065	183.267	134.191	2.35669	8.25014	-3.22968	-0.83706	-2.39262	NAA40	-	chr11_63951918_+
chr11:6234023-6234191:mpeak_30104|chr11_6233097_6255941_FAM160A2_NM_-|	31.0247	-4.1451	1.4877	2.78625	0.00533213	0.0860263	0	1.33969	0	12.6726	27.3847	4.73614	20.0355	42.87	42.1558	79.4915	70.5683	71.0421	3.82545	20.2592	-5.06332	-1.07348	-3.98984	FAM160A2	-	chr11_6212821_-
chr11:43489206-43489258:mpeak_32057|chr11_43380434_43515322_TTC17_NM_+|	141.167	-2.96479	1.50362	1.97177	0.0486357	0.233341	0	6.69843	0.638724	8.06436	25.2782	0	408.415	357.696	266.348	222.346	206.439	192.077	1.06597	8.05556	-2.18407	0.733742	-2.91781	TTC17	-	chr11_43467706_+
chr11:34935666-34935850:mpeak_31837|chr11_34904363_34937958_APIP_NM_-|	16.7253	-2.88579	1.46638	1.96797	0.0490719	NA	0	5.35875	0	14.9767	8.42607	4.73614	33.9062	10.7175	49.1817	14.9767	14.7456	43.6778	17.1379	38.3363	-2.3926	0.35389	-2.74649	APIP	-	chr11_34914238_-
chr11:32119246-32119385:mpeak_31540|chr11_32112476_32125910_RCN1_NM_+|	38.0644	-3.52249	1.51352	2.32735	0.0199466	0.147563	0	2.67937	0	12.6726	1.05326	2.63119	67.8124	66.9843	136.687	35.7136	44.2369	86.303	2.96081	9.8386	-2.60994	0.70748	-3.31742	RCN1	-	chr11_32097862_+
chr11:125512479-125512625:mpeak_38162|chr11_125495030_125525119_CHEK1_NR_+mpeak_38162|chr11_125495030_125545822_CHEK1_NM_+||	23.9147	-2.16247	1.05166	2.05626	0.0397579	0.209539	4.62357	2.67937	1.27745	5.76025	9.47933	3.68367	78.6007	33.4922	56.8464	42.6259	26.3315	21.5758	5.07898	20.902	-1.14104	0.899987	-2.04103	CHEK1	-	chr11_125642634_+
chr10:16790757-16790988:mpeak_21108|chr10_16635495_16859453_RSU1_NM_-|	53.5564	-4.02969	1.4684	2.74426	0.00606467	0.0906525	0	1.33969	0.638724	2.3041	14.7456	2.63119	129.46	76.3621	189.062	58.7546	46.3434	121.035	0.751515	8.70326	-3.31438	0.80426	-4.11864	RSU1	-	chr10_16748711_-
chr10:135213482-135213541:mpeak_29560|chr10_135207620_135233529_MTG1_NM_+|	120.589	-4.68136	1.29612	3.61184	0.000304036	0.0327091	0	0	1.27745	14.9767	4.21303	18.9446	266.626	196.934	326.388	173.96	172.734	271.013	0.485139	6.17352	-4.89975	0.354835	-5.25459	MTG1	-	chr10_133400037_+
chr10:127544710-127544773:mpeak_29179|chr10_127525424_127569884_DHX32_NM_-|	35.7579	-2.34557	1.05325	2.22698	0.0259487	0.166564	0	4.01906	1.27745	4.6082	10.5326	13.6822	70.8947	33.4922	80.4792	67.971	72.6748	69.4634	4.29758	13.7181	-2.44411	-0.184659	-2.25945	DHX32	-	chr10_125856106_-
chr10:12062979-12063029:mpeak_20689|chr10_11963306_12085169_UPF2_NM_-|	36.4484	-2.38799	1.14338	2.08853	0.0367504	0.200337	0	1.33969	1.27745	3.45615	2.10652	6.31486	87.8478	65.6446	78.563	70.2751	63.1955	57.3599	1.69171	6.22412	-2.18217	0.282177	-2.46435	UPF2	-	chr10_12020981_-
chr10:102135060-102135289:mpeak_27175|chr10_102133332_102147793_OLMALINC_NR_+|	24.7981	-2.29497	1.13219	2.02702	0.0426599	0.21711	3.08238	25.454	2.55489	43.7779	51.6097	75.7783	7.70595	14.7366	21.0779	20.7369	18.9587	12.1035	71.4408	330.442	-2.46081	-0.251234	-2.20958	OLMALINC	-	chr10_100375498_+
chr1:95318823-95319028:mpeak_7198|chr1_95285897_95360373_SLC44A3_NM_+|	7.97317	-3.51048	1.41206	2.48606	0.0129166	NA	0	1.33969	1.27745	3.45615	10.5326	13.156	7.70595	8.03812	19.8004	10.3685	8.42607	11.5772	11.0445	89.3748	-3.37461	0.226896	-3.60151	SLC44A3	-	chr1_94853382_+;chr1_94853464_+
chr1:90318598-90318827:mpeak_6703|chr1_90286572_90398625_LRRC8D_NM_+|	60.3252	-2.54344	0.967988	2.62756	0.00860006	0.104969	0	6.69843	2.55489	16.1287	34.7575	8.41981	126.378	96.4574	92.6149	132.486	93.74	113.667	4.40006	17.4484	-2.68014	-0.107671	-2.57246	LRRC8D	-	chr1_89853111_+
chr1:78426481-78426564:mpeak_6204|chr1_78412261_78444889_FUBP1_NR_-mpeak_6204|chr1_78414459_78444889_FUBP1_NM_-||	427.822	-1.94092	0.695087	2.79234	0.0052328	0.0855973	15.4119	18.7556	8.30341	40.3218	66.3553	64.201	830.701	526.497	997.047	814.5	601.411	1150.36	1.80401	6.65863	-2.00842	-0.124406	-1.88401	FUBP1	-	chr1_77960824_-
chr1:7833261-7833367:mpeak_541|chr1_7831328_7839685_VAMP3_NM_+|	58.9619	-3.26644	1.13965	2.86618	0.00415453	0.0780394	4.62357	0	0	8.06436	3.15978	7.89357	144.872	132.629	147.545	64.5148	78.9944	115.246	3.26334	7.38833	-2.04783	0.71603	-2.76386	VAMP3	-	chr1_7773303_+
chr1:62291061-62291168:mpeak_5512|chr1_62208148_62626579_INADL_NM_+|	19.0428	-2.29647	1.15532	1.98773	0.0468411	NA	1.54119	1.33969	1.91617	6.9123	3.15978	13.6822	36.9886	18.7556	43.4332	33.4095	23.1717	44.204	4.83684	23.5692	-2.30797	-0.0232003	-2.28477	INADL	-	chr1_61825494_+
chr1:38056354-38056551:mpeak_3463|chr1_38032608_38061586_GNL2_NM_-|	65.194	-3.94384	1.3166	2.99547	0.00274023	0.0670037	0	1.33969	0.638724	2.3041	7.37281	11.051	175.696	120.572	150.739	139.398	114.805	58.4124	0.663887	6.63048	-3.38916	0.515904	-3.90507	GNL2	-	chr1_37590753_-
chr1:32845485-32845552:mpeak_2897|chr1_32832255_32860062_BSDC1_NR_-mpeak_2897|chr1_32834151_32860062_BSDC1_NM_-||	18.1653	-2.17309	0.818592	2.65467	0.00793854	NA	3.08238	8.03812	6.38724	10.3685	13.6924	13.156	33.9062	44.2097	33.2136	16.1287	22.1184	13.6822	15.7261	71.6681	-1.08796	1.10021	-2.18817	BSDC1	-	chr1_32379870_-
chr1:25087760-25088012:mpeak_2128|chr1_25071759_25167263_CLIC4_NM_+|	97.9346	-2.09763	0.882846	2.37599	0.0175022	0.140115	1.54119	12.0572	6.38724	8.06436	25.2782	28.4169	232.72	139.327	261.877	158.983	109.539	191.024	3.15268	13.4392	-1.6277	0.464099	-2.0918	CLIC4	-	chr1_24761508_+
chr1:23352139-23352285:mpeak_1894|chr1_23345940_23409671_KDM1A_NM_+|	32.9631	-3.82687	1.56042	2.45247	0.0141881	0.128506	0	2.67937	0.638724	3.45615	12.6391	20.5233	20.0355	28.1334	146.268	56.4505	16.8521	87.8818	2.55978	22.7184	-3.46415	0.270588	-3.73473	KDM1A	-	chr1_23025697_+
chr1:220170322-220170372:mpeak_17894|chr1_220142298_220220000_EPRS_NM_-|	35.9297	-3.81705	1.90464	2.00408	0.0450615	0.223805	0	0	0	0	1.05326	8.94605	21.5767	28.1334	134.132	54.1464	51.6097	131.56	#DIV/0!	6.32026	-Inf	-0.36834	-Inf	EPRS	-	chr1_219996997_-
chr1:21474503-21474629:mpeak_1724|chr1_21133993_21503381_EIF4G3_NM_-|	107.574	-3.29061	1.10643	2.97409	0.00293863	0.0681749	1.54119	1.33969	0.638724	8.06436	17.9054	5.26238	243.508	186.216	201.837	253.451	167.468	203.654	0.557286	5.00055	-3.14955	0.0160511	-3.1656	EIF4G3	-	chr1_21148070_-
chr1:200568494-200568707:mpeak_16195|chr1_200522895_200589862_KIF14_NM_-|	94.8176	-1.82722	0.815742	2.23995	0.0250942	0.16404	18.4943	2.67937	4.47107	34.5615	61.089	31.5743	164.907	127.27	102.834	199.305	209.598	181.026	6.49214	21.5661	-2.31065	-0.578645	-1.732	KIF14	-	chr1_200599436_-
chr1:20087224-20087303:mpeak_1597|chr1_20009937_20126410_TMCO4_NM_-|	12.3556	-4.86299	1.6144	3.01225	0.00259318	NA	0	0	0	0	5.26629	6.31486	24.659	30.8128	24.9102	24.1931	14.7456	17.3659	#DIV/0!	30.8531	-Inf	0.513622	-Inf	TMCO4	-	chr1_19760681_-
chr1:193158996-193159053:mpeak_15874|chr1_193091087_193219805_CDC73_NM_+|	58.6442	-2.38682	1.18302	2.01757	0.0436358	0.219933	4.62357	1.33969	0	23.041	16.8521	7.36733	73.9771	44.2097	106.667	114.053	89.527	222.072	3.97809	11.1031	-2.98646	-0.92069	-2.06577	CDC73	-	chr1_193189916_+
chr1:193020894-193020955:mpeak_15836|chr1_192989586_193029237_UCHL5_NR_-mpeak_15836|chr1_192985525_193028523_UCHL5_NM_-||	185.824	-1.9293	0.797868	2.41807	0.0156031	0.1338	3.08238	6.69843	7.66468	8.06436	10.5326	23.6807	560.993	328.223	441.358	353.68	253.835	232.071	1.31113	5.03554	-1.27704	0.664299	-1.94134	UCHL5	-	chr1_193051816_-
chr1:179857237-179857336:mpeak_14988|chr1_179851176_179886586_TOR1AIP1_NM_+|	79.594	-2.39278	0.96738	2.47346	0.0133811	0.125311	0	6.69843	1.91617	5.76025	14.7456	23.6807	158.743	111.194	173.733	148.615	120.071	189.972	2.91251	9.63389	-2.35875	-0.0479338	-2.31082	TOR1AIP1	-	chr1_179888191_+
chr1:160308843-160309187:mpeak_13318|chr1_160260006_160313354_COPA_NM_-|	376.263	-1.53517	0.718038	2.13801	0.0325155	0.187524	18.4943	52.2478	21.7166	48.3861	77.9411	45.7827	839.949	588.122	1155.45	525.335	424.463	717.262	3.57878	10.3242	-0.89645	0.632032	-1.52848	COPA	-	chr1_160339284_-
chr1:153719504-153719554:mpeak_12332|chr1_153700566_153745668_INTS3_NM_+|	12.3488	-2.79514	1.39027	2.01049	0.0443791	NA	4.62357	0	0	2.3041	4.21303	7.36733	16.9531	24.1144	40.2396	11.5205	17.9054	18.9446	17.0597	28.7044	-1.58639	0.749253	-2.33565	INTS3	-	chr1_153747076_+
chr1:114471264-114471314:mpeak_9168|chr1_114466954_114472147_HIPK1-AS1_NR_-|	2.7286	-5.07532	2.50422	2.02671	0.0426925	NA	0	1.33969	0	0	0	8.94605	3.08238	8.03812	7.02596	1.15205	2.10652	1.05248	22.1479	622.544	-2.73935	2.07358	-4.81293	HIPK1-AS1	-	chr1_113928644_-
chr1:110950879-110950965:mpeak_8584|chr1_110950430_110958630_LAMTOR5-AS1_NR_+|	4.31876	-4.7614	2.32028	2.05208	0.0401622	NA	9.24714	8.03812	1.91617	1.15205	9.47933	0.526238	1.54119	2.67937	17.2455	0	0	0	89.45	#DIV/0!	0.783185	Inf	-Inf	LAMTOR5-AS1	-	-
chr3:156876383-156876783:mpeak_134738|chr3_156864396_156878549_CCNL1_NM_-|	18.4986	-5.62436	1.50231	3.74381	0.000181252	NA	32.365	24.1144	32.5749	38.0177	28.438	46.8352	7.70595	9.37781	2.55489	0	0	0	453.464	#DIV/0!	-0.347275	Inf	-Inf	CCNL1	-	-
chr3:156872435-156872514:mpeak_134730|chr3_156864396_156878549_CCNL1_NM_-|	9.71825	-5.74635	1.62032	3.54643	0.00039049	NA	10.7883	20.0953	10.2196	25.3451	13.6924	16.8396	7.70595	9.37781	2.55489	0	0	0	209.298	#DIV/0!	-0.443006	Inf	-Inf	CCNL1	-	-
chr3:156873040-156873093:mpeak_134732|chr3_156864396_156878549_CCNL1_NM_-|	3.67037	-5.95807	2.16625	2.7504	0.00595221	NA	3.08238	0	6.38724	2.3041	3.15978	9.47228	7.70595	9.37781	2.55489	0	0	0	72.3289	#DIV/0!	-0.657432	Inf	-Inf	CCNL1	-	-
chr3:156874139-156874216:mpeak_134733|chr3_156864396_156878549_CCNL1_NM_-|	6.98299	-6.05025	1.80084	3.35968	0.000780318	NA	4.62357	10.7175	8.94213	4.6082	10.5326	24.7332	7.70595	9.37781	2.55489	0	0	0	123.65	#DIV/0!	-0.715489	Inf	-Inf	CCNL1	-	-
chr3:156875984-156876097:mpeak_134736|chr3_156864396_156878549_CCNL1_NM_-|	3.97405	-6.27494	2.13291	2.94196	0.00326138	NA	4.62357	5.35875	0	8.06436	6.31955	3.68367	7.70595	9.37781	2.55489	0	0	0	76.2449	#DIV/0!	-0.855956	Inf	-Inf	CCNL1	-	-
chr3:156875744-156875808:mpeak_134735|chr3_156864396_156878549_CCNL1_NM_-|	6.48899	-6.56132	1.95299	3.35963	0.000780476	NA	4.62357	9.37781	3.83234	4.6082	4.21303	31.5743	7.70595	9.37781	2.55489	0	0	0	90.8093	#DIV/0!	-1.17959	Inf	-Inf	CCNL1	-	-
chr3:156871192-156871280:mpeak_134726|chr3_156864396_156878549_CCNL1_NM_-|	3.54098	-6.79096	2.05558	3.30368	0.000954257	NA	3.08238	1.33969	1.91617	2.3041	3.15978	11.051	7.70595	9.37781	2.55489	0	0	0	32.2743	#DIV/0!	-1.38161	Inf	-Inf	CCNL1	-	-
chr3:156872136-156872186:mpeak_134728|chr3_156864396_156878549_CCNL1_NM_-|	2.81004	-7.9691	2.99251	2.66301	0.0077444	NA	0	1.33969	0.638724	0	0	12.1035	7.70595	9.37781	2.55489	0	0	0	15.1111	#DIV/0!	-2.61301	Inf	-Inf	CCNL1	-	-
chr17:58657693-58657752:mpeak_84438|chr17_58641906_58663668_LOC388406_NR_+|	4.8065	-9.2719	2.27379	4.07773	4.54773e-05	NA	1.54119	0	0.638724	18.4328	15.7989	6.84109	0	8.03812	6.38724	0	0	0	15.1117	#DIV/0!	-4.23584	Inf	-Inf	LOC388406	-	-
chr6:30690920-30691042:mpeak_161188|chr6_30687977_30691715_TUBB_NR_+mpeak_161188|chr6_30687977_30691116_TUBB_NM_+||	9.66359	-9.04065	1.70745	5.29482	1.19134e-07	NA	1.54119	1.33969	1.27745	28.8013	38.9706	18.9446	10.7883	8.03812	5.10979	1.15205	0	0	17.3725	2509.04	-4.38223	4.37692	-8.75915	TUBB	-	-
chr1:114468986-114469167:mpeak_9164|chr1_114466954_114472147_HIPK1-AS1_NR_-|	13.6368	-2.66849	1.0976	2.43121	0.0150485	NA	24.659	18.7556	15.9681	20.7369	27.3847	33.6792	3.08238	8.03812	7.02596	1.15205	2.10652	1.05248	327.241	1897.47	-0.462073	2.07358	-2.53565	HIPK1-AS1	-	-
chr6:49435639-49435735:mpeak_163070|chr6_49431095_49459856_CENPQ_NM_+|	9.01783	-3.65585	1.58387	2.30818	0.0209892	NA	4.62357	8.03812	3.83234	19.5849	26.3315	29.4693	0	0	11.497	1.15205	2.10652	1.57871	47.8212	1558.43	-2.19235	1.24899	-3.44134	CENPQ	-	-
chr19:41885371-41885554:mpeak_95028|chr19_41869870_41889465_TMEM91_NM_+|	42.6092	-2.66454	0.89058	2.99192	0.00277229	0.0670037	32.365	22.7747	17.2455	99.0764	102.166	158.924	9.24714	25.454	8.94213	10.3685	18.9587	5.78862	165.856	1025.66	-2.3149	0.313643	-2.62854	TMEM91	-	-
chr6:30689598-30689652:mpeak_161185|chr6_30687977_30691715_TUBB_NR_+mpeak_161185|chr6_30687977_30691116_TUBB_NM_+||	5.52154	-5.58664	1.72819	3.23266	0.00122645	NA	3.08238	2.67937	7.66468	10.3685	12.6391	4.73614	10.7883	8.03812	5.10979	1.15205	0	0	56.0925	802.734	-1.04708	4.37692	-5.424	TUBB	-	-
chr7:149300833-149300973:mpeak_179008|chr7_149246465_149321881_ZNF767P_NR_-|	42.9312	-2.12862	0.93504	2.2765	0.0228162	0.156702	36.9886	109.854	33.2136	66.8189	87.4205	54.2025	18.4943	49.5684	31.2975	11.5205	11.5858	4.2099	181.216	763.069	-0.211196	1.86291	-2.0741	ZNF767P	-	-
chr16:28781231-28781348:mpeak_72960|chr16_28763755_28783473_NPIPB9_NM_+|	4.87606	-3.85494	1.54929	2.48819	0.0128394	NA	1.54119	8.03812	1.27745	5.76025	10.5326	6.31486	4.62357	12.0572	5.10979	1.15205	1.05326	1.05248	49.8233	693.959	-1.05822	2.74174	-3.79996	NPIPB9	-	-
chr13:34402235-34402393:mpeak_52011|chr13_34392205_34540223_RFC3_NM_+|	20.5109	-2.52605	1.09185	2.31354	0.0206929	NA	10.7883	34.8319	9.58085	54.1464	41.0771	30.5218	4.62357	22.7747	19.1617	2.3041	9.47933	6.84109	118.559	675.16	-1.18774	1.32189	-2.50962	RFC3	-	-
chr20:57423252-57423579:mpeak_118415|chr20_57394310_57425958_GNAS-AS1_NR_-|	12.3294	-3.48073	1.21355	2.86823	0.00412771	NA	12.3295	8.03812	7.02596	28.8013	36.8641	16.8396	10.7883	12.0572	6.38724	4.6082	4.21303	0	93.7086	623.533	-1.59064	1.72853	-3.31917	GNAS-AS1	-	-
chr16:28780928-28781043:mpeak_72959|chr16_28763755_28783473_NPIPB9_NM_+|	4.1649	-4.26132	1.63682	2.60342	0.00922995	NA	0	5.35875	1.27745	4.6082	5.26629	8.41981	4.62357	12.0572	5.10979	1.15205	1.05326	1.05248	45.6817	561.556	-1.46297	2.74174	-4.20471	NPIPB9	-	-
chrX:7179352-7179408:mpeak_197509|chrX_7137471_7267928_STS_NM_+|	4.58215	-8.59846	2.15581	3.98852	6.64881e-05	NA	0	0	0	8.06436	1.05326	13.6822	4.62357	12.0572	12.7745	1.15205	0	1.57871	#DIV/0!	556.616	-Inf	3.43115	-Inf	STS	-	-
chr2:163164833-163165049:mpeak_108433|chr2_163123889_163175218_IFIH1_NM_-|	13.2977	-3.26015	1.60346	2.03319	0.0420329	NA	27.7414	6.69843	19.1617	46.082	16.8521	12.1035	3.08238	5.35875	17.8843	4.6082	0	0	203.612	542.783	-0.48534	2.51418	-2.99952	IFIH1	-	-
chr11:85613014-85613188:mpeak_36181|chr11_85566143_85630391_CCDC83_NM_+|	14.9011	-3.08335	1.44256	2.13741	0.0325647	NA	4.62357	9.37781	0	28.8013	67.4086	20.5233	6.16476	13.3969	3.83234	11.5205	10.5326	2.63119	89.7756	472.905	-3.05957	-0.0774563	-2.98212	CCDC83	-	-
chr7:111802560-111802693:mpeak_176717|chr7_111368776_111846462_DOCK4_NM_-|	11.2051	-2.95428	1.2355	2.39116	0.0167954	NA	4.62357	5.35875	5.10979	38.0177	24.2249	26.3119	6.16476	2.67937	8.94213	4.6082	0	8.41981	84.8526	453.149	-2.55277	0.449146	-3.00192	DOCK4	-	-
chr9:19432294-19432344:mpeak_189836|chr9_19408924_19450447_ACER2_NM_+|	4.52285	-7.30318	2.70487	2.70001	0.00693364	NA	0	0	0	0	0	9.47228	12.3295	10.7175	17.2455	3.45615	1.05326	0	#DIV/0!	420.112	-Inf	3.1595	-Inf	ACER2	-	-
chr4:89566259-89566309:mpeak_142568|chr4_89513573_89627902_HERC3_NM_+|	3.9498	-6.28185	2.56003	2.45382	0.0141348	NA	0	0	0	0	0	7.89357	4.62357	5.35875	23.6328	1.15205	1.05326	3.68367	#DIV/0!	402.119	-Inf	2.51302	-Inf	HERC3	-	-
chrX:118551683-118551809:mpeak_200969|chrX_118533257_118586827_SLC25A43_NM_+|	20.6693	-2.92648	1.10673	2.64426	0.00818698	NA	9.24714	14.7366	3.19362	29.9533	57.9292	46.3089	13.8707	10.7175	27.4651	4.6082	7.37281	22.6282	52.2105	387.733	-2.30382	0.588832	-2.89265	SLC25A43	-	-
chr22:24954510-24954675:mpeak_121944|chr22_24951617_24967883_SNRPD3_NR_+|chr22_24951617_24967883_SNRPD3_NM_+mpeak_121944|chr22_24951617_24967883_SNRPD3_NM_+||	17.998	-2.63456	1.20931	2.17856	0.0293647	NA	10.7883	22.7747	10.2196	20.7369	30.5445	31.5743	41.6121	14.7366	11.497	17.2808	2.10652	2.10495	64.5326	385.515	-0.920244	1.65844	-2.57869	SNRPD3	-	-
chr4:175221344-175221395:mpeak_147251|chr4_175204827_175252632_CEP44_NM_+|	3.6557	-6.47055	2.68981	2.40558	0.0161469	NA	0	0	1.91617	3.45615	1.05326	18.4183	0	6.69843	10.2196	0	2.10652	0	22.6524	362.806	-3.5808	3.00563	-6.58642	CEP44	-	-
[truncated: 2,520 more rows]
