# Supplementary material for: Compartment-specific and ELAVL1-coordinated regulation of intronic polyadenylation isoforms by doxorubicin
Source: HighWire-hosted journal article supplement (doi:10.1101/gr.276192.121), 2022-07-01
Supplement: Supplemental_Table_S2.xlsx.xlsx [file Supplemental_Table_S2.xlsx.xlsx]

## Sheet: Sheet1
Supplemental Table S2 : List of IPA isoforms regulated by 6-hour doxorubicin in polysomes of MCF-7 cells by 3’-seq analysis.
IPA peaks	baseMean	log2FoldChange IPA:LE	lfcSE	stat	pvalue	padj	7	16	28	6	15	27	LE,07	LE,16	LE,28	LE,06	LE,15	LE,27	%IPA (+doxo)	%IPA (-doxo)	log2FC_IPA	log2FC_LE	log2FC IPA-logFC LE	gene	Tian polyA site	Zavolan polyA site	refSeqCDS
chr9:72372604-72372723:mpeak_74783|chr9_72333484_72374876_PTAR1_NM_-|	3	9,26	2,7	-3,5	5,03E-04	2,09E-02	12	0	5	0	0	0	1	0	0	4	7	9	717	#DIV/0!	Inf	-4,12	Inf	PTAR1	chr9:72372599:-;chr9:72372673:-	chr9_69757663_-;chr9_69757757_-	uc004ahj.4:72333257:72374854:-;uc004ahi.3:72333257:72374854:-
chr1:228823222-228823288:mpeak_7463|chr1_228780393_228879031_RHOU_NR_+|	33	8,09	1,5	-5,3	1,17E-07	7,70E-05	158	48	56	43	22	20	0	0	0	24	19	7	#DIV/0!	170	1,62	-Inf	Inf	RHOU	-	-	-
chr2:242034434-242034484:mpeak_45849|chr2_242028780_242041747_MTERF4_NR_-|	5	8,09	2,3	-3,6	3,62E-04	1,87E-02	16	0	1	1	1	2	0	0	0	11	18	9	#DIV/0!	11	2,08	-Inf	Inf	MTERF4	-	-	-
chr2:160317432-160317497:mpeak_43797|chr2_160176929_160473112_BAZ2B_NM_-|	16	8,01	1,5	-5,2	2,21E-07	1,19E-04	12	18	14	12	3	5	1	0	0	23	75	31	1249	16	1,06	-6,79	7,85	BAZ2B	chr2:160317442:-	-	uc010fop.1:160294813:160335230:-;uc002uat.4:160295513:160335230:-;uc002uas.1:160289268:160335230:-;uc002uao.3:160176775:160335230:-;uc002uap.3:160176775:160335230:-;uc002uau.1:160294774:160335230:-
chr14:103090486-103090536:mpeak_24580|chr14_103058995_103192804_RCOR1_NM_+|	41	7,77	1,4	-5,7	1,50E-08	1,48E-05	16	5	14	0	0	0	31	33	45	105	147	89	32	#DIV/0!	Inf	-1,64	Inf	RCOR1	-	-	uc001ymb.4:103059223:103192843:+
chr16:89493183-89493233:mpeak_30783|chr16_89353521_89556969_ANKRD11_NR_-mpeak_30783|chr16_89335071_89556969_ANKRD11_NM_-||	22	7,59	2,1	-3,6	3,21E-04	1,78E-02	19	0	0	0	0	0	14	20	6	57	81	73	140	#DIV/0!	Inf	-2,40	Inf	ANKRD11	-	-	-
chr19:37851415-37851465:mpeak_38487|chr19_37825579_37853010_HKR1_NM_+|	9	7,54	1,9	-4,0	7,16E-05	7,93E-03	0	3	14	0	0	0	3	5	6	23	20	33	178	#DIV/0!	Inf	-2,41	Inf	HKR1	chr19:37851466:+	chr19_37360563_+	uc002oga.3:37826126:37854677:+;uc010xto.2:37826126:37854677:+;uc002ogb.3:37835586:37854677:+;uc002ogc.3:37826126:37854677:+;uc010xtp.2:37838184:37854677:+;uc002ogd.3:37838184:37854677:+
chr4:73977175-73977250:mpeak_56701|chr4_73942007_74124502_ANKRD17_NM_-|	51	7,50	1,6	-4,8	1,47E-06	5,83E-04	2	9	14	0	0	0	36	60	32	164	242	53	19	#DIV/0!	Inf	-1,84	Inf	ANKRD17	chr4:73977174:-	chr4_73111458_-;chr4_73111498_-	uc003hgo.3:73941947:74088744:-;uc003hgp.3:73941947:74124385:-;uc003hgq.3:73941947:74124385:-;uc003hgr.3:73941947:74124385:-
chr16:9188227-9188349:mpeak_28085|chr16_9185536_9210524_C16orf72_NM_+|	78	7,18	1,9	-3,8	1,51E-04	1,19E-02	17	0	0	0	0	0	44	84	45	220	304	217	30	#DIV/0!	Inf	-2,10	Inf	C16orf72	-	-	uc002czm.3:9185901:9210769:+
chr1:100585941-100585992:mpeak_3286|chr1_100550990_100598651_SASS6_NM_-|	4	7,00	1,9	-3,6	2,93E-04	1,73E-02	9	3	8	1	1	1	0	1	0	7	8	5	524	15	2,79	-3,92	6,71	SASS6	-	chr1_100120398_-	uc001dsu.3:100550883:100598370:-;uc009wdz.3:100550883:100585997:-
chr17:57949816-57949954:mpeak_33957|chr17_57937785_57970306_TUBD1_NM_-|	110	6,96	1,6	-4,2	2,26E-05	3,28E-03	26	0	4	0	0	0	128	127	149	251	303	327	11	#DIV/0!	Inf	-1,12	Inf	TUBD1	chr17:57949859:-;chr17:57949887:-	chr17_59872489_-;chr17_59872541_-	uc010ddh.2:57937682:57958434:-;uc002ixw.2:57937682:57968363:-;uc002ixx.2:57937682:57968363:-;uc010wok.2:57937682:57968363:-;uc010ddf.2:57937682:57968363:-;uc010wol.2:57937682:57955584:-;uc010ddg.2:57937682:57968258:-;uc010ddi.2:57937682:57968363:-
chr1:150902864-150902966:mpeak_4766|chr1_150898814_150936722_SETDB1_NM_+|	62	6,95	1,5	-4,6	4,10E-06	1,01E-03	14	0	3	1	0	0	22	29	36	232	206	205	29	1	3,64	-2,88	6,53	SETDB1	chr1:150902912:+;chr1:150902968:+	chr1_150930449_+;chr1_150930490_+	uc001evw.4:150900190:150917638:+;uc009wmf.2:150900190:150923564:+;uc009wmg.2:150900190:150936322:+;uc001evv.2:150900190:150936840:+;uc001evu.2:150900190:150936840:+
chr19:24113457-24113509:mpeak_38121|chr19_24097683_24115144_ZNF726_NM_+|	4	6,87	3,4	-2,0	4,58E-02	2,75E-01	20	0	0	0	0	5	0	0	0	4	5	9	#DIV/0!	87	1,88	-Inf	Inf	ZNF726	chr19:24113508:+	chr19_23930705_+	uc021urw.1:24097796:24116769:+
chr5:179161088-179161141:mpeak_62823|chr5_179159850_179200895_MAML1_NM_+|	84	6,82	1,4	-4,9	1,20E-06	5,08E-04	5	14	4	0	0	0	62	104	106	239	160	308	8	#DIV/0!	Inf	-1,38	Inf	MAML1	chr5:179161139:+	chr5_179734138_+;chr5_179734180_+	uc003mkm.3:179160113:179201878:+;uc003mkn.1:179160113:179218871:+
chr19:44716922-44716972:mpeak_38905|chr19_44716680_44738854_ZNF227_NM_+|	8	6,75	2,4	-2,8	5,64E-03	8,18E-02	5	0	9	0	0	0	0	16	1	18	33	13	82	#DIV/0!	Inf	-1,89	Inf	ZNF227	chr19:44716947:+	-	-
chr16:69398479-69398541:mpeak_29885|chr16_69390959_69419891_TERF2_NM_-|	106	6,67	1,4	-4,8	1,79E-06	6,27E-04	8	0	7	0	0	0	77	133	89	261	320	373	8	#DIV/0!	Inf	-1,67	Inf	TERF2	-	-	uc002exd.4:69390800:69419748:-
chr12:133311262-133311339:mpeak_20070|chr12_133304029_133338474_ANKLE2_NM_-|	75	6,63	1,7	-3,9	8,38E-05	8,73E-03	0	0	13	0	0	0	70	50	76	227	207	252	20	#DIV/0!	Inf	-1,80	Inf	ANKLE2	-	chr12_132734674_-	uc001ukx.2:133303827:133338384:-;uc001uky.3:133310601:133331714:-
chr17:27266264-27266314:mpeak_32260|chr17_27233535_27278508_PHF12_NM_-|	9	6,60	2,1	-3,2	1,29E-03	3,41E-02	2	4	19	4	0	0	0	0	5	26	16	31	164	17	2,62	-3,85	6,46	PHF12	chr17:27266263:-	chr17_28939246_-	uc010wbb.1:27233200:27277276:-;uc002hdg.1:27233200:27277978:-;uc002hdi.1:27237052:27277966:-;uc002hdj.1:27239473:27277978:-;uc002hdk.1:27253813:27277966:-
chr17:65200828-65200878:mpeak_34444|chr17_65074702_65241319_HELZ_NM_-|	62	6,41	2,0	-3,3	1,06E-03	3,08E-02	19	0	0	0	0	0	80	103	35	180	166	166	26	#DIV/0!	Inf	-1,23	Inf	HELZ	-	-	uc010des.1:65197175:65214920:-;uc002jfx.4:65074367:65214920:-;uc010wqk.2:65074367:65214920:-
chr3:24185148-24185202:mpeak_51138|chr3_24164616_24536313_THRB_NM_-|	6	6,40	1,9	-3,3	8,69E-04	2,82E-02	0	8	10	0	0	0	2	8	5	12	15	8	177	#DIV/0!	Inf	-1,25	Inf	THRB	-	-	uc003ccz.4:24164374:24270450:-;uc010hfe.3:24164374:24270450:-;uc003ccy.4:24164374:24270450:-;uc003ccx.4:24164374:24270450:-
chr9:5098280-5098346:mpeak_74035|chr9_4985244_5126683_JAK2_NM_+|	21	6,38	1,6	-3,9	8,83E-05	8,98E-03	12	102	14	1	1	0	15	30	7	15	34	15	244	5	5,86	-0,27	6,14	JAK2	-	chr9_5098333_+	uc010mhm.3:5021987:5126791:+;uc003ziw.3:5021987:5126791:+
chr18:12633743-12633799:mpeak_35578|chr18_12449895_12657912_SPIRE1_NM_-|	76	6,35	1,4	-4,6	4,42E-06	1,05E-03	2	9	14	0	0	0	108	136	99	159	243	144	7	#DIV/0!	Inf	-0,67	Inf	SPIRE1	chr18:12633748:-	-	uc010wzw.2:12449636:12635072:-;uc010wzx.2:12449636:12635072:-;uc002kre.3:12449636:12657865:-;uc010wzy.2:12449636:12657865:-
chr1:32651934-32651984:mpeak_1485|chr1_32645344_32660502_TXLNA_NM_+|	64	6,24	1,7	-3,7	2,02E-04	1,38E-02	0	0	11	0	0	0	51	59	71	153	143	275	18	#DIV/0!	Inf	-1,65	Inf	TXLNA	-	-	uc001bui.3:32645946:32660796:+;uc001buj.3:32645946:32660796:+
chr9:116268495-116268545:mpeak_75967|chr9_116207008_116359047_RGS3_NM_+|	28	6,23	1,8	-3,5	4,92E-04	2,09E-02	0	0	11	0	0	0	17	34	25	84	55	104	42	#DIV/0!	Inf	-1,66	Inf	RGS3	-	-	uc004bht.4:116263856:116359233:+;uc010muy.4:116263856:116359233:+;uc004bhq.4:116222536:116359233:+;uc004bhr.4:116226082:116303707:+;uc004bhs.4:116245250:116359233:+
chr5:131944972-131945083:mpeak_61248|chr5_131892615_131977869_RAD50_NM_+|	15	6,23	1,9	-3,3	1,01E-03	3,04E-02	15	11	1	0	0	0	12	49	5	26	44	23	41	#DIV/0!	Inf	-0,49	Inf	RAD50	-	chr5_132609330_+;chr5_132609376_+	uc003kxi.3:131893016:131978056:+;uc003kxh.3:131915060:131978056:+
chr15:57022975-57023034:mpeak_25963|chr15_56924320_57026284_ZNF280D_NM_-|	4	6,21	2,7	-2,3	2,15E-02	1,77E-01	16	11	0	4	5	0	0	0	0	1	10	2	#DIV/0!	101	1,60	-Inf	Inf	ZNF280D	-	-	-
chr17:17657932-17657994:mpeak_31865|chr17_17584786_17713283_RAI1_NM_+|	191	6,21	1,1	-5,7	9,92E-09	1,18E-05	8	0	26	5	2	2	34	42	46	666	761	700	42	0	1,90	-4,13	6,03	RAI1	chr17:17657990:+	chr17_17754689_+	-
chr16:14294437-14294581:mpeak_28269|chr16_14165169_14354765_MKL2_NM_+|	22	6,20	1,6	-4,0	7,59E-05	8,06E-03	17	1	17	0	2	0	9	29	11	35	96	43	73	3	4,41	-1,82	6,24	MKL2	chr16:14294558:+;chr16:14294586:+	-	uc010uzb.2:14294344:14334682:+;uc002dch.3:14280771:14334405:+;uc002dcg.3:14234463:14355301:+;uc010uza.2:14234463:14355301:+
chr10:70952973-70953027:mpeak_9466|chr10_70939959_70968355_SUPV3L1_NM_+|	12	6,18	1,8	-3,4	6,41E-04	2,34E-02	0	20	5	0	0	1	12	11	8	46	17	26	122	2	5,23	-1,53	6,76	SUPV3L1	chr10:70953023:+	chr10_69193238_+;chr10_69193271_+	uc001jpe.1:70940047:70968791:+;uc010qjd.1:70946242:70968791:+
chr8:145768540-145768591:mpeak_73861|chr8_145756000_145911197_ARHGAP39_NM_-|	8	6,12	1,8	-3,3	8,16E-04	2,72E-02	8	1	8	0	0	1	1	4	12	31	9	26	105	3	4,69	-2,01	6,71	ARHGAP39	-	-	uc003zds.1:145755805:145830999:-;uc003zdt.1:145755805:145830999:-;uc011llk.1:145755805:145830999:-
chr13:25907192-25907242:mpeak_20394|chr13_25875665_25914102_NUPL1_NM_+|	60	6,10	2,0	-3,1	1,80E-03	3,95E-02	0	19	0	0	0	0	118	67	59	188	161	113	23	#DIV/0!	Inf	-0,92	Inf	NUPL1	chr13:25907246:+	chr13_25333104_+	uc001uqi.3:25875911:25914272:+;uc001uqj.3:25875911:25914272:+
chr7:105515536-105515592:mpeak_69466|chr7_105248340_105517031_ATXN7L1_NM_-|	5	6,07	1,9	-3,1	1,80E-03	3,95E-02	9	4	14	4	6	2	0	0	0	5	1	10	#DIV/0!	73	1,16	-Inf	Inf	ATXN7L1	chr7:105515541:-	chr7_105875096_-	uc003vde.2:105248298:105517004:-;uc003vdi.2:105401823:105517004:-
chr19:24106698-24106809:mpeak_38118|chr19_24097683_24115144_ZNF726_NM_+|	5	6,06	2,0	-3,0	2,47E-03	4,93E-02	1	15	12	5	1	8	0	0	0	4	5	9	#DIV/0!	77	1,00	-Inf	Inf	ZNF726	chr19:24106767:+	chr19_23923946_+	uc021urw.1:24097796:24116769:+
chr1:9634797-9634886:mpeak_389|chr1_9599527_9642356_SLC25A33_NM_+|	36	6,05	1,3	-4,7	2,40E-06	7,36E-04	28	43	5	1	2	0	23	49	29	105	77	64	75	2	4,64	-1,29	5,92	SLC25A33	-	chr1_9574807_+	uc001apw.3:9599750:9642559:+
chr20:31988870-31988920:mpeak_46688|chr20_31946929_31989375_CDK5RAP1_NM_-|	43	6,03	1,7	-3,5	4,40E-04	2,04E-02	3	16	0	0	0	0	45	53	84	114	69	136	16	#DIV/0!	Inf	-0,81	Inf	CDK5RAP1	chr20:31988869:-	chr20_33401064_-	uc010gel.4:31946848:31989364:-
chr5:14687992-14688043:mpeak_59014|chr5_14664782_14692962_OTULIN_NM_+|	38	6,02	1,8	-3,4	6,38E-04	2,34E-02	0	0	13	0	0	0	33	57	45	122	98	91	29	#DIV/0!	Inf	-1,21	Inf	OTULIN	chr5:14688013:+;chr5:14688044:+;chr5:14688084:+	chr5_14687934_+	uc003jfk.3:14664934:14693157:+
chr20:45237351-45237408:mpeak_47229|chr20_45188837_45313124_SLC13A3_NM_-|	6	6,01	2,5	-2,4	1,51E-02	1,45E-01	3	14	14	15	3	0	0	0	0	0	11	9	#DIV/0!	89	0,77	-Inf	Inf	SLC13A3	chr20:45237348:-	chr20_46608712_-	uc010ghn.2:45188660:45242382:-;uc002xsf.2:45188660:45280060:-;uc010zxx.2:45188660:45242181:-;uc010zxw.2:45188660:45280060:-;uc002xsg.2:45188660:45242334:-;uc010gho.2:45188660:45242334:-
chr12:3044538-3044593:mpeak_15453|chr12_3000032_3048476_TULP3_NM_+|	90	6,00	1,4	-4,3	1,84E-05	2,77E-03	2	9	9	0	0	0	80	155	180	161	261	217	4,94	#DIV/0!	Inf	-0,62	Inf	TULP3	chr12:3044589:+	chr12_2935422_+	uc009zec.1:3043622:3048610:+;uc010sei.1:3031505:3048610:+;uc001qlj.2:3000113:3049892:+;uc010seh.1:3000113:3048610:+
chr16:1402427-1402525:mpeak_27571|chr16_1401899_1412997_GNPTG_NM_+|	17	5,99	1,7	-3,5	4,96E-04	2,09E-02	0	11	5	0	0	0	31	24	9	46	25	56	38	#DIV/0!	Inf	-0,98	Inf	GNPTG	chr16:1402500:+	chr16_1352498_+;chr16_1352559_+	uc002clm.3:1401966:1413092:+
chr19:24112032-24112149:mpeak_38120|chr19_24097683_24115144_ZNF726_NM_+|	23	5,98	1,5	-4,0	5,26E-05	6,51E-03	41	53	76	14	42	35	0	0	0	4	5	9	#DIV/0!	490	0,90	-Inf	Inf	ZNF726	chr19:24112086:+	chr19_23929286_+	uc021urw.1:24097796:24116769:+
chr2:174097038-174097092:mpeak_44109|chr2_173940564_174130777_ZAK_NM_+|	97	5,98	1,4	-4,4	1,18E-05	2,19E-03	7	6	14	0	0	0	165	180	185	172	300	132	5,09	#DIV/0!	Inf	-0,19	Inf	ZAK	-	-	uc002uhz.3:173955759:174131478:+
chr13:37575073-37575123:mpeak_20680|chr13_37574677_37583320_EXOSC8_NM_+|	38	5,97	1,7	-3,5	5,28E-04	2,10E-02	0	0	12	0	0	0	37	42	53	96	111	102	28	#DIV/0!	Inf	-1,23	Inf	EXOSC8	-	-	uc001uwa.3:37574942:37583436:+
chr5:86629077-86629160:mpeak_60356|chr5_86564069_86686616_RASA1_NM_+|	9	5,96	1,7	-3,6	3,71E-04	1,89E-02	6	6	7	0	0	0	2	20	13	12	15	30	55	#DIV/0!	Inf	-0,68	Inf	RASA1	-	-	uc003kiw.3:86564268:86686700:+;uc003kix.3:86564864:86686700:+;uc011ctv.2:86565066:86686700:+;uc011ctw.2:86626759:86686700:+;uc010jaw.3:86564864:86686700:+
chr17:35502961-35503067:mpeak_32619|chr17_35444374_35766902_ACACA_NM_-|	92	5,95	1,5	-4,0	7,05E-05	7,93E-03	0	13	8	0	0	0	127	179	125	280	254	120	7	#DIV/0!	Inf	-0,60	Inf	ACACA	chr17:35503019:-	-	uc010cuy.3:35444250:35562705:-;uc002hnk.3:35444250:35641864:-;uc002hnl.3:35444250:35656257:-;uc002hnm.3:35444250:35687339:-;uc002hnn.3:35444250:35687339:-;uc002hno.3:35444250:35766389:-
chr13:42380292-42380342:mpeak_20819|chr13_42142441_42535221_VWA8_NM_-|	10	5,89	1,9	-3,0	2,31E-03	4,68E-02	2	0	12	0	0	0	8	19	10	46	17	10	59	#DIV/0!	Inf	-0,97	Inf	VWA8	-	-	uc001uyj.3:42142332:42535151:-;uc001uyk.3:42293722:42535151:-
chrX:107938303-107938353:mpeak_78753|chrX_107683073_107939526_COL4A5_NM_+|	11	5,88	2,0	-2,9	4,04E-03	6,56E-02	0	0	12	0	0	0	8	20	7	20	36	29	97	#DIV/0!	Inf	-1,25	Inf	COL4A5	-	chrX_108695102_+	uc004enz.2:107683355:107939608:+;uc022ccg.2:107683355:107939608:+
chr22:24135735-24135785:mpeak_49414|chr22_24129149_24176327_SMARCB1_NM_+|	177	5,81	1,9	-3,1	1,72E-03	3,85E-02	0	0	23	0	0	0	303	253	415	355	412	366	7	#DIV/0!	Inf	-0,22	Inf	SMARCB1	-	-	uc002zyg.2:24129356:24143584:+;uc011ajb.1:24129356:24143584:+;uc002zya.3:24129356:24176656:+;uc002zyb.3:24129356:24176367:+;uc002zyc.3:24129356:24176367:+;uc002zyd.3:24129356:24176367:+
chr21:34098807-34098857:mpeak_48350|chr21_34004111_34100351_SYNJ1_NM_-|	6	5,79	2,1	-2,8	5,64E-03	8,18E-02	5	0	10	0	0	2	0	5	1	9	20	17	256	13	2,87	-3,02	5,89	SYNJ1	chr21:34098804:-	-	uc011ads.1:34007173:34099206:-;uc002yqf.2:34007173:34099206:-;uc002yqg.2:34003304:34099206:-;uc002yqi.2:34007173:34100351:-;uc002yqh.2:34003304:34100351:-
chr6:25431066-25431116:mpeak_63532|chr6_25279655_25619674_LRRC16A_NM_+|	26	5,78	1,7	-3,4	5,96E-04	2,25E-02	2	0	11	0	0	0	19	59	25	78	75	47	19	#DIV/0!	Inf	-0,96	Inf	LRRC16A	chr6:25431117:+	-	uc010jpy.3:25280023:25619811:+;uc011djw.2:25280023:25619811:+
chr15:50635534-50635584:mpeak_25631|chr15_50570981_50647605_GABPB1_NM_-|	22	5,77	1,7	-3,4	6,21E-04	2,30E-02	2	0	14	0	0	0	29	44	27	51	65	37	25	#DIV/0!	Inf	-0,62	Inf	GABPB1	-	-	-
chr17:17588310-17588364:mpeak_31861|chr17_17584786_17713283_RAI1_NM_+|	193	5,77	0,7	-8,4	3,86E-17	2,30E-13	17	11	17	8	8	1	34	42	46	666	761	700	38	1	1,49	-4,13	5,62	RAI1	chr17:17588364:+	chr17_17684998_+;chr17_17685049_+	-
chr20:57408863-57408995:mpeak_47811|chr20_57394310_57425958_GNAS-AS1_NR_-|	5	5,76	1,8	-3,2	1,33E-03	3,41E-02	5	10	9	0	0	0	9	4	4	1	7	11	138	#DIV/0!	Inf	-0,11	Inf	GNAS-AS1	chr20:57408864:-	chr20_58833810_-	-
chr4:140058570-140058720:mpeak_57880|chr4_139980761_140060630_ELF2_NM_-|	6	5,74	1,9	-3,0	3,15E-03	5,64E-02	1	0	14	0	1	1	2	1	2	7	15	24	406	7	2,83	-3,00	5,84	ELF2	-	-	uc003ihp.1:139980136:140058855:-
chr17:8110169-8110296:mpeak_31570|chr17_8108362_8113944_AURKB_NM_-|	1147	5,73	2,5	-2,2	2,45E-02	1,91E-01	17	0	0	0	0	0	1444	1040	2911	2228	2467	3662	1	#DIV/0!	Inf	-0,63	Inf	AURKB	chr17:8110177:-	-	uc021tpy.1:8108188:8113542:-;uc002gkm.4:8108188:8113542:-;uc010vuu.3:8108188:8111083:-;uc002gkn.4:8108188:8113542:-
chr6:12015778-12015912:mpeak_63256|chr6_12012723_12163515_HIVEP1_NM_+|	17	5,72	1,3	-4,4	8,64E-06	1,71E-03	33	20	9	8	16	14	0	4	0	20	41	44	542	36	0,68	-4,81	5,49	HIVEP1	-	-	uc003nac.3:12015861:12164694:+
chr9:97784125-97784266:mpeak_75305|chr9_97488950_97848963_C9orf3_NM_+|	40	5,67	1,6	-3,5	4,47E-04	2,04E-02	5	0	15	0	0	0	50	113	44	82	90	81	14	#DIV/0!	Inf	-0,29	Inf	C9orf3	-	-	uc004auy.3:97522065:97844997:+;uc004auz.1:97522065:97843098:+;uc004ava.3:97522065:97844997:+;uc011luj.2:97766505:97844997:+;uc011luk.2:97766505:97844997:+
chr7:132657026-132657085:mpeak_69955|chr7_132470421_132766828_CHCHD3_NM_-|	39	5,63	1,8	-3,1	1,66E-03	3,85E-02	1	0	14	0	0	0	30	113	35	114	88	77	13	#DIV/0!	Inf	-0,65	Inf	CHCHD3	chr7:132657040:-	chr7_132972285_-	uc003vre.3:132470397:132766697:-;uc022alw.1:132470397:132766697:-
chr5:130883796-130883897:mpeak_61207|chr5_130762984_130970929_RAPGEF6_NM_-|	7	5,61	2,0	-2,8	5,01E-03	7,48E-02	5	14	0	7	7	2	0	1	0	23	10	13	735	34	0,25	-5,19	5,44	RAPGEF6	-	-	uc003kvo.2:130762958:130970723:-;uc010jdi.2:130762958:130970723:-;uc010jdj.2:130762958:130970723:-;uc003kvn.2:130762958:130970723:-;uc003kvr.3:130771643:130970723:-;uc010jdk.3:130799729:130970723:-;uc003kvp.2:130762958:131132614:-
chr3:133335834-133335886:mpeak_53646|chr3_133320237_133380737_TOPBP1_NM_-|	28	5,61	1,7	-3,2	1,31E-03	3,41E-02	0	4	17	0	0	0	49	77	19	61	59	47	21	#DIV/0!	Inf	-0,20	Inf	TOPBP1	chr3:133335827:-	-	uc003eps.3:133320093:133379971:-
chr16:493991-494041:mpeak_27506|chr16_475667_570725_RAB11FIP3_NM_+|	4	5,59	2,5	-2,2	2,83E-02	2,08E-01	0	4	9	0	0	0	1	0	12	7	4	15	93	#DIV/0!	Inf	-0,98	Inf	RAB11FIP3	chr16:494041:+	chr16_444041_+	uc002chf.3:476006:570839:+
chr12:47502789-47502839:mpeak_16596|chr12_47473385_47628789_PCED1B_NM_+|	6	5,59	1,9	-2,9	3,30E-03	5,79E-02	0	5	9	0	0	0	2	10	8	9	13	13	101	#DIV/0!	Inf	-0,78	Inf	PCED1B	-	chr12_47109056_+	-
chr6:20600306-20600356:mpeak_63444|chr6_20534687_21231078_CDKAL1_NM_+|	12	5,55	1,6	-3,4	6,16E-04	2,30E-02	8	14	1	0	0	0	10	21	25	20	21	19	41	#DIV/0!	Inf	-0,08	Inf	CDKAL1	chr6:20600357:+	chr6_20600125_+	uc003ndd.2:20546581:21231270:+;uc003nde.2:20546678:21231270:+;uc021ymk.1:20546581:21231270:+
chr14:74485946-74486000:mpeak_23678|chr14_74433717_74486026_ENTPD5_NM_-|	5	5,50	2,6	-2,1	3,42E-02	2,33E-01	23	0	0	0	0	0	2	10	7	5	9	5	357	#DIV/0!	Inf	0,01	Inf	ENTPD5	-	-	-
chr9:72915030-72915128:mpeak_74788|chr9_72873877_72967106_SMC5_NM_+|	43	5,46	1,5	-3,7	2,26E-04	1,45E-02	7	4	9	0	0	0	114	97	29	70	107	80	8	#DIV/0!	Inf	-0,10	Inf	SMC5	-	-	uc004ahr.2:72873994:72967247:+
chr2:32947061-32947111:mpeak_40905|chr2_32853086_33045882_TTC27_NM_+|	32	5,46	1,7	-3,3	9,89E-04	3,02E-02	0	10	7	0	0	0	20	98	45	81	52	75	16	#DIV/0!	Inf	-0,35	Inf	TTC27	chr2:32947112:+	chr2_32722044_+	uc002rom.3:32853359:33046005:+;uc010ymx.2:32855651:33046005:+
chr6:159420323-159420377:mpeak_66741|chr6_159398880_159421198_RSPH3_NM_-|	5	5,45	1,8	-3,1	2,09E-03	4,36E-02	8	3	5	0	0	1	2	3	6	4	13	13	148	7	4,55	-1,47	6,02	RSPH3	chr6:159420321:-	chr6_158999291_-	uc003qrx.3:159398569:159421008:-;uc010kju.3:159398569:159421008:-
chr16:2793746-2793800:mpeak_27759|chr16_2787289_2802601_SRRM2-AS1_NR_-|	3	5,45	2,7	-2,0	4,11E-02	2,60E-01	0	11	7	0	0	0	2	3	5	0	1	11	281	#DIV/0!	Inf	-0,23	Inf	SRRM2-AS1	chr16:2793749:-	chr16_2743749_-	-
chr5:135483517-135483564:mpeak_61486|chr5_135468533_135513025_SMAD5_NM_+|	92	5,45	1,6	-3,4	6,57E-04	2,37E-02	14	4	0	0	0	0	212	160	102	188	230	199	6	#DIV/0!	Inf	-0,38	Inf	SMAD5	-	-	-
chr17:74413487-74413542:mpeak_34866|chr17_74387694_74449288_UBE2O_NM_-|	285	5,44	1,3	-4,2	2,75E-05	3,90E-03	3	8	5	1	0	0	282	327	314	838	735	909	2	0	3,57	-1,43	5,00	UBE2O	chr17:74413491:-	chr17_76417412_-	uc002jrm.4:74387023:74449223:-;uc002jrn.4:74392056:74449223:-
chr12:104327910-104328074:mpeak_18690|chr12_104324111_104341410_HSP90B1_NM_+|	1007	5,44	1,6	-3,5	5,15E-04	2,09E-02	17	1	12	0	0	0	772	4396	1918	1785	1697	1488	0	#DIV/0!	Inf	0,51	Inf	HSP90B1	-	chr12_103934251_+	uc001tkb.2:104324293:104341440:+;uc009zui.2:104324293:104341597:+
chr19:54658571-54658622:mpeak_39688|chr19_54641435_54659046_CNOT3_NM_+|	9	5,43	2,6	-2,1	3,90E-02	2,52E-01	0	0	14	0	0	0	0	15	24	19	19	19	74	#DIV/0!	Inf	-0,56	Inf	CNOT3	chr19:54658623:+	chr19_54154884_+	uc002qdj.2:54646714:54659145:+;uc002qdk.2:54646714:54659145:+
chr11:73742248-73742298:mpeak_14048|chr11_73724570_73882064_C2CD3_NM_-|	20	5,40	2,0	-2,7	6,12E-03	8,54E-02	0	0	17	0	0	0	24	48	30	42	43	35	51	#DIV/0!	Inf	-0,23	Inf	C2CD3	-	-	-
chr19:24104291-24104347:mpeak_38117|chr19_24097683_24115144_ZNF726_NM_+|	8	5,38	1,7	-3,2	1,32E-03	3,41E-02	10	30	6	8	14	14	0	0	0	4	5	9	#DIV/0!	197	0,34	-Inf	Inf	ZNF726	chr19:24104343:+	chr19_23921540_+	uc021urw.1:24097796:24116769:+
chr16:89592909-89592959:mpeak_30790|chr16_89574795_89623294_SPG7_NM_+|	141	5,33	1,5	-3,5	4,53E-04	2,04E-02	2	0	12	0	0	0	217	151	355	291	339	330	3	#DIV/0!	Inf	-0,41	Inf	SPG7	chr16:89592962:+	chr16_89526551_+	uc002fni.3:89574825:89603318:+;uc002fnj.3:89574825:89623501:+
chr15:80744189-80744242:mpeak_26865|chr15_80696691_80885940_ARNT2_NM_+|	131	5,32	1,7	-3,2	1,28E-03	3,41E-02	0	0	11	0	0	0	158	136	294	346	257	371	6	#DIV/0!	Inf	-0,73	Inf	ARNT2	chr15:80744242:+	-	uc010unm.2:80743222:80886039:+;uc002bfs.3:80743222:80886039:+;uc002bfq.3:80696857:80767596:+;uc002bfr.3:80696857:80886039:+
chr6:36514428-36514491:mpeak_64335|chr6_36463691_36515293_STK38_NM_-|	190	5,31	1,4	-3,7	1,90E-04	1,32E-02	7	0	14	0	0	0	436	387	386	295	438	322	3	#DIV/0!	Inf	0,20	Inf	STK38	-	chr6_36546652_-	-
chr4:77590093-77590140:mpeak_56821|chr4_77356252_77699961_SHROOM3_NM_+|	116	5,30	1,4	-3,8	1,44E-04	1,19E-02	0	5	8	0	0	1	99	126	139	370	395	246	5,34	0	4,27	-1,47	5,74	SHROOM3	-	chr4_76668979_+	uc011cbx.2:77357205:77700330:+
chr14:102290748-102290814:mpeak_24490|chr14_102228134_102391477_PPP2R5C_NM_+|	63	5,30	1,5	-3,5	5,32E-04	2,10E-02	12	10	0	0	0	0	112	140	120	130	120	111	9	#DIV/0!	Inf	0,04	Inf	PPP2R5C	chr14:102290803:+	chr14_101824461_+	uc010txs.1:102276309:102348626:+;uc001ykj.4:102228230:102302517:+;uc010txt.2:102276309:102372870:+;uc001ykn.3:102276279:102378834:+;uc010txr.2:102228230:102391609:+;uc001ykk.3:102228230:102391609:+;uc001yko.3:102276279:102391609:+;uc001ykp.3:102276279:102391609:+
chr3:133336362-133336413:mpeak_53648|chr3_133320237_133380737_TOPBP1_NM_-|	27	5,30	1,7	-3,0	2,38E-03	4,78E-02	13	5	0	0	0	0	49	77	19	61	59	47	18	#DIV/0!	Inf	-0,20	Inf	TOPBP1	chr3:133336361:-	chr3_133617518_-	uc003eps.3:133320093:133379971:-
chr20:44652148-44652246:mpeak_47209|chr20_44650328_44686152_SLC12A5_NM_+|	13	5,29	1,6	-3,4	7,76E-04	2,65E-02	64	20	22	1	15	11	0	3	0	8	5	9	1412	125	1,96	-3,12	5,09	SLC12A5	chr20:44652220:+;chr20:44652245:+	chr20_46023588_+	uc010zxl.1:44650404:44686244:+
chr9:74586459-74586540:mpeak_74807|chr9_74526422_74587607_C9orf85_NM_+|	5	5,27	1,9	-2,7	6,91E-03	9,17E-02	15	0	6	3	0	0	5	3	1	8	14	11	364	25	2,95	-1,91	4,86	C9orf85	-	-	uc004ain.3:74526650:74587758:+
chr17:29096660-29096736:mpeak_32385|chr17_29036625_29096889_SUZ12P1_NR_+|	7	5,27	2,4	-2,2	2,90E-02	2,10E-01	21	0	0	1	0	0	12	6	2	18	11	8	313	11	3,96	-0,86	4,82	SUZ12P1	chr17:29096747:+	chr17_30769726_+	-
chr5:153784440-153784490:mpeak_62187|chr5_153570294_153796373_GALNT10_NM_+|	106	5,24	1,6	-3,2	1,18E-03	3,30E-02	0	0	12	0	0	0	192	174	163	251	249	234	7	#DIV/0!	Inf	-0,47	Inf	GALNT10	chr5:153784493:+	chr5_154404930_+	uc003lvh.3:153570426:153796532:+;uc010jid.3:153677529:153796532:+
chr11:77897622-77897672:mpeak_14238|chr11_77885629_77899675_KCTD21_NM_-|	7	5,23	2,1	-2,5	1,30E-02	1,34E-01	0	3	12	0	3	0	5	4	0	16	15	23	167	14	2,47	-2,70	5,17	KCTD21	chr11:77897622:-	chr11_78186577_-	-
chr10:71888623-71888673:mpeak_9501|chr10_71874085_71892690_AIFM2_NM_-|	111	5,22	1,5	-3,5	4,48E-04	2,04E-02	0	8	14	0	0	0	295	142	270	181	194	224	4,51	#DIV/0!	Inf	0,24	Inf	AIFM2	chr10:71888622:-	chr10_70128867_-	-
chr16:2218458-2218508:mpeak_27685|chr16_2205798_2226560_TRAF7_NM_+|	269	5,21	1,4	-3,8	1,22E-04	1,10E-02	12	0	6	0	0	0	452	555	594	455	590	565	2	#DIV/0!	Inf	-0,01	Inf	TRAF7	chr16:2218511:+	chr16_2168515_+	uc002cow.3:2213921:2226575:+
chr2:222432300-222432350:mpeak_45346|chr2_222285272_222438922_EPHA4_NM_-|	41	5,20	1,7	-3,0	2,92E-03	5,43E-02	0	0	12	0	0	0	48	91	65	104	105	72	18	#DIV/0!	Inf	-0,47	Inf	EPHA4	-	-	uc002vmr.2:222291179:222436968:-;uc002vmq.3:222290747:222436968:-
chr6:53364869-53364968:mpeak_64823|chr6_53363765_53409927_GCLC_NM_-|	69	5,19	1,5	-3,4	7,22E-04	2,51E-02	15	0	4	0	0	0	99	166	143	108	178	120	7	#DIV/0!	Inf	0,01	Inf	GCLC	-	-	uc003pbv.1:53363553:53373509:-;uc003pbw.2:53363553:53409443:-;uc021zau.1:53363553:53409443:-
chr6:37401109-37401159:mpeak_64382|chr6_37400906_37447788_CMTR1_NM_+|	59	5,18	1,5	-3,5	4,83E-04	2,09E-02	3	0	10	0	0	0	79	130	105	104	107	172	6	#DIV/0!	Inf	-0,28	Inf	CMTR1	-	-	-
chr8:146125232-146125297:mpeak_73900|chr8_146108221_146126846_ZNF250_NM_-|	10	5,16	1,6	-3,1	1,74E-03	3,88E-02	16	19	10	15	9	13	0	0	1	4	4	23	2093	119	0,29	-5,43	5,73	ZNF250	chr8:146125234:-	chr8_144899853_-	-
chr7:72234587-72234648:mpeak_68483|chr7_72040704_72298813_TYW1B_NM_-|	4	5,14	2,3	-2,3	2,42E-02	1,89E-01	7	0	11	5	3	0	1	0	0	5	5	7	764	74	1,02	-3,94	4,96	TYW1B	-	-	uc011keh.1:72023756:72298654:-;uc011kej.2:72040482:72298654:-
chr3:15751195-15751247:mpeak_51019|chr3_15712063_15901053_ANKRD28_NM_-|	67	5,14	1,4	-3,5	3,91E-04	1,92E-02	19	10	5	1	0	0	90	210	73	136	151	103	9	1	4,64	-0,07	4,71	ANKRD28	-	-	uc003cai.1:15711776:15777004:-;uc011avz.1:15711776:15777004:-;uc003caj.1:15711776:15900910:-;uc003cal.1:15726733:15838028:-;uc003cam.2:15726733:15838028:-
chr2:99952317-99952367:mpeak_42602|chr2_99936262_99952860_TXNDC9_NM_-|	35	5,11	1,8	-2,9	4,19E-03	6,71E-02	0	0	12	0	0	0	72	67	36	89	83	56	21	#DIV/0!	Inf	-0,38	Inf	TXNDC9	-	-	uc010yvp.1:99923235:99954798:-
chr1:206769053-206769123:mpeak_6844|chr1_206765177_206785904_EIF2D_NM_-|	144	5,09	1,8	-2,9	3,71E-03	6,17E-02	0	3	22	1	0	0	82	389	264	303	271	398	4,93	0	4,16	-0,41	4,56	EIF2D	chr1:206769052:-	chr1_206595704_-	uc001heh.2:206765106:206785695:-;uc009xbw.2:206765106:206785695:-
chr17:78079184-78079241:mpeak_35037|chr17_78075354_78093070_GAA_NM_+|	188	5,08	1,5	-3,4	7,74E-04	2,65E-02	16	0	13	0	0	0	341	455	621	255	178	379	3	#DIV/0!	Inf	0,80	Inf	GAA	chr17:78079235:+	chr17_80105435_+	uc002jxo.3:78078385:78093130:+;uc002jxp.3:78078385:78093130:+;uc002jxq.3:78078385:78093130:+
chr11:113194128-113194180:mpeak_14757|chr11_113185250_113236946_TTC12_NM_+|	18	5,07	1,7	-2,9	3,38E-03	5,82E-02	0	3	14	0	0	0	23	29	45	39	36	21	25	#DIV/0!	Inf	0,01	Inf	TTC12	-	-	uc001pnu.3:113186979:113237022:+;uc001pnv.3:113186979:113237022:+
chr13:115087811-115087914:mpeak_21815|chr13_115079964_115089262_CHAMP1_NM_+|	16	5,06	1,5	-3,5	4,81E-04	2,09E-02	16	16	17	5	6	2	14	0	0	55	30	36	117	11	1,88	-3,11	4,99	CHAMP1	chr13:115087863:+;chr13:115087916:+	chr13_114322387_+;chr13_114322486_+	-
chr20:20023089-20023164:mpeak_46446|chr20_20017006_20036690_CRNKL1_NM_-|	92	5,05	1,4	-3,6	3,55E-04	1,85E-02	13	0	9	0	0	0	169	248	199	124	179	163	5,23	#DIV/0!	Inf	0,40	Inf	CRNKL1	-	chr20_20042505_-	uc002wrs.3:20016838:20036658:-
chr7:129274437-129274492:mpeak_69868|chr7_129251542_129394857_NRF1_NM_+mpeak_69868|chr7_129251542_129394857_NRF1_NM_+||	16	5,03	1,6	-3,2	1,39E-03	3,46E-02	6	0	10	5	1	0	3	1	9	45	46	65	169	6	1,35	-3,47	4,82	NRF1	chr7:129274493:+	chr7_129634651_+	-
chr5:179044985-179045066:mpeak_62786|chr5_179041960_179050722_HNRNPH1_NM_-mpeak_62786|chr5_179041960_179050722_HNRNPH1_NM_-||	1068	5,02	1,3	-3,8	1,24E-04	1,10E-02	3	13	8	0	0	0	2062	2865	2654	1499	2062	1648	0	#DIV/0!	Inf	0,54	Inf	HNRNPH1	-	chr5_179618051_-	uc021yjd.1:179041841:179050134:-;uc003mkf.5:179042546:179050134:-;uc003mkg.5:179042546:179048013:-;uc003mke.4:179042546:179050134:-;uc003mkh.4:179042546:179050134:-
chr2:65542705-65542755:mpeak_41686|chr2_65541303_65659656_SPRED2_NM_-|	16	4,99	2,0	-2,5	1,31E-02	1,34E-01	0	0	14	1	0	0	6	23	29	47	49	28	72	3	3,34	-1,11	4,45	SPRED2	-	chr2_65315569_-	uc010fcw.3:65540634:65593740:-;uc002sdr.4:65540634:65659121:-
chr6:7556286-7556338:mpeak_63139|chr6_7541869_7582874_DSP_NM_+|	1387	4,98	1,5	-3,4	6,86E-04	2,45E-02	9	0	6	0	0	0	2322	3809	2040	2640	4208	1615	0	#DIV/0!	Inf	-0,05	Inf	DSP	chr6:7556337:+	chr6_7556103_+	uc003mxp.1:7542148:7586111:+;uc003mxq.1:7542148:7586111:+;uc021yle.1:7542148:7586111:+
chr9:94053230-94053280:mpeak_75141|chr9_93976707_94124251_AUH_NM_-|	8	4,96	2,3	-2,1	3,27E-02	2,28E-01	0	0	11	0	0	0	2	28	6	22	11	17	89	#DIV/0!	Inf	-0,46	Inf	AUH	chr9:94053229:-	chr9_91290948_-	uc004arf.4:93976629:94124171:-;uc004arg.4:93976629:94124171:-
chr18:20516838-20516930:mpeak_35724|chr18_20513294_20606105_RBBP8_NM_+|	16	4,95	1,7	-3,0	3,02E-03	5,56E-02	13	9	6	1	0	0	27	43	5	26	44	13	37	5	4,34	-0,15	4,50	RBBP8	-	-	uc002ktx.1:20516814:20573602:+;uc002ktw.3:20516814:20606203:+;uc002kty.3:20516814:20606203:+;uc002ktz.3:20516814:20606210:+;uc002kua.3:20516814:20606203:+
chr10:94397013-94397076:mpeak_10171|chr10_94352824_94413421_KIF11_NM_+|	48	4,93	1,4	-3,5	5,29E-04	2,10E-02	2	10	5	0	0	0	70	132	91	107	101	56	6	#DIV/0!	Inf	0,15	Inf	KIF11	-	-	uc001kic.3:94353132:94413553:+
chr5:179439638-179439688:mpeak_62873|chr5_179382669_179499118_RNF130_NM_-|	26	4,92	1,5	-3,3	8,21E-04	2,72E-02	8	4	7	0	0	1	20	63	31	70	38	66	17	1	4,83	-0,61	5,45	RNF130	-	-	uc003mll.1:179382653:179498702:-;uc003mlm.1:179382664:179498702:-
chr4:151656439-151656524:mpeak_58114|chr4_151186964_151936649_LRBA_NM_-|	84	4,91	1,6	-3,0	2,34E-03	4,71E-02	9	13	0	0	0	0	181	214	173	142	202	70	6	#DIV/0!	Inf	0,46	Inf	LRBA	-	-	uc003ilt.4:151186873:151770708:-;uc003ilu.4:151186873:151935794:-;uc010ipj.3:151186873:151935794:-
chr5:174945880-174945930:mpeak_62546|chr5_174905513_174953640_SFXN1_NM_+|	268	4,89	1,7	-3,0	3,05E-03	5,57E-02	0	0	14	0	0	0	402	586	623	599	529	467	3	#DIV/0!	Inf	0,01	Inf	SFXN1	-	chr5_175518927_+	uc003mda.2:174919106:174953737:+;uc003mdb.1:174919260:174949465:+
chr5:41904836-41904912:mpeak_59381|chr5_41904469_41917117_C5orf51_NM_+|	17	4,88	1,5	-3,3	1,04E-03	3,05E-02	8	4	9	0	0	1	33	10	35	34	30	44	27	2	4,94	-0,48	5,42	C5orf51	chr5:41904890:+;chr5:41904917:+	chr5_41904812_+	uc003jmo.3:41904469:41917401:+
chr1:45101979-45102037:mpeak_2107|chr1_44870959_45116375_RNF220_NM_+|	74	4,87	1,3	-3,8	1,50E-04	1,19E-02	12	13	1	3	1	0	56	39	95	196	186	284	13	1	2,81	-1,81	4,62	RNF220	chr1:45102038:+	chr1_44636363_+	uc010okz.2:45097826:45115701:+;uc001cma.1:45101230:45115701:+;uc001clx.2:45097826:45116447:+;uc010okx.1:45079928:45110464:+;uc001clv.1:44877769:45116447:+;uc001clw.1:44877769:45116447:+;uc010oky.1:45079928:45116447:+
chr8:126085511-126085641:mpeak_73379|chr8_126036915_126104061_KIAA0196_NM_-|	41	4,85	1,7	-2,9	3,94E-03	6,46E-02	1	11	21	1	0	0	55	156	37	89	86	31	13	2	4,63	0,26	4,36	KIAA0196	-	-	uc003yrt.3:126036858:126096140:-;uc011lir.2:126036858:126093976:-
chr3:160665426-160665574:mpeak_54377|chr3_160473995_160786598_PPM1L_NM_+|	16	4,85	1,1	-4,3	1,77E-05	2,77E-03	17	28	8	3	1	1	17	13	14	18	33	39	119	5	3,65	-1,01	4,66	PPM1L	-	chr3_160947688_+;chr3_160947784_+;chr3_160947824_+	uc003fdr.3:160474096:160786945:+;uc003fdt.3:160560062:160786945:+
chr12:101724281-101724331:mpeak_18613|chr12_101673904_101779745_UTP20_NM_+|	26	4,85	1,9	-2,5	1,19E-02	1,26E-01	0	0	11	0	0	0	21	87	27	68	64	36	24	#DIV/0!	Inf	-0,32	Inf	UTP20	-	-	uc001tia.1:101674060:101779901:+
chr1:117919814-117919866:mpeak_4090|chr1_117910084_118065446_MAN1A2_NM_+|	45	4,83	1,4	-3,4	6,20E-04	2,30E-02	6	4	11	0	0	0	104	127	82	47	106	57	7	#DIV/0!	Inf	0,58	Inf	MAN1A2	chr1:117919868:+	chr1_117377244_+	uc009whg.1:117911082:118042176:+;uc001ehd.1:117910805:118065579:+
chr11:31508238-31508288:mpeak_12307|chr11_31454115_31531175_IMMP1L_NM_-|	74	4,83	1,8	-2,8	5,91E-03	8,40E-02	0	0	15	0	0	0	131	204	133	136	111	162	10	#DIV/0!	Inf	0,19	Inf	IMMP1L	chr11:31508237:-	chr11_31486691_-	-
chr6:74227669-74227719:mpeak_65005|chr6_74227657_74230755_EEF1A1_NM_-|	5970	4,78	1,6	-3,0	2,91E-03	5,43E-02	0	3	12	0	0	0	4673	17396	16320	12093	8805	12337	0	#DIV/0!	Inf	0,21	Inf	EEF1A1	-	chr6_73517974_-	uc003phi.3:74227532:74229749:-;uc003phj.3:74227532:74229749:-;uc003phl.3:74227536:74229749:-
chr5:110092422-110092471:mpeak_60750|chr5_110073836_110096903_SLC25A46_NM_+|	61	4,75	1,5	-3,1	2,11E-03	4,38E-02	1	0	12	0	0	0	96	142	129	108	116	126	5,19	#DIV/0!	Inf	0,07	Inf	SLC25A46	-	-	uc011cvi.2:110073938:110097482:+;uc003koz.3:110074820:110097482:+
chr20:21307148-21307248:mpeak_46477|chr20_21283941_21369910_XRN2_NM_+|	41	4,74	1,6	-2,9	3,85E-03	6,31E-02	0	9	12	1	0	0	33	121	58	126	54	78	15	2	3,96	-0,29	4,25	XRN2	-	-	uc002wsf.1:21284036:21369976:+;uc002wsg.1:21307152:21369976:+;uc010zsk.1:21307003:21369976:+
chr11:76503791-76503842:mpeak_14162|chr11_76493356_76506652_TSKU_NM_+|	78	4,74	0,8	-5,9	3,50E-09	5,21E-06	13	3	6	3	1	4	29	26	30	295	250	271	26	1	1,53	-3,26	4,79	TSKU	chr11:76503845:+	chr11_76792798_+	-
chr20:16509020-16509104:mpeak_46334|chr20_16254056_16554079_KIF16B_NM_-|	7	4,72	1,6	-2,9	3,65E-03	6,12E-02	10	9	6	12	14	7	0	0	0	9	8	3	#DIV/0!	168	-0,37	-Inf	Inf	KIF16B	-	-	uc002wpg.2:16253897:16553920:-;uc010gch.2:16253897:16553920:-;uc010gci.2:16347790:16553920:-;uc010gcj.2:16359451:16553920:-
chr15:100230712-100230768:mpeak_27381|chr15_100106132_100252594_MEF2A_NM_+|	19	4,61	1,8	-2,6	8,70E-03	1,05E-01	0	1	14	1	0	0	31	35	22	45	55	27	27	3	3,54	-0,52	4,05	MEF2A	chr15:100230769:+	chr15_99690563_+;chr15_99690613_+	uc002bvg.3:100173324:100252976:+;uc010urv.2:100173324:100252976:+;uc010bos.3:100173324:100252976:+;uc002bvf.3:100173324:100252976:+;uc002bve.3:100173324:100252976:+;uc002bvi.3:100173324:100252976:+;uc010urw.2:100173324:100252976:+;uc010bot.3:100173324:100252976:+
chr11:108014730-108014780:mpeak_14641|chr11_107992257_108017996_ACAT1_NM_+|	55	4,61	1,7	-2,7	6,73E-03	9,05E-02	0	26	11	1	1	0	17	189	71	115	101	128	20	1	4,08	-0,31	4,39	ACAT1	-	-	uc001pjy.3:107992333:108018117:+
chr8:59550286-59550336:mpeak_71859|chr8_59496759_59572404_NSMAF_NM_-|	84	4,59	1,6	-2,8	4,76E-03	7,24E-02	0	0	12	0	0	0	135	201	181	161	152	170	7	#DIV/0!	Inf	0,10	Inf	NSMAF	-	-	uc011lee.2:59496664:59571905:-;uc003xtt.3:59496664:59572190:-
chr2:201324481-201324531:mpeak_44701|chr2_201170603_201342358_SPATS2L_NM_+|	28	4,59	1,7	-2,7	7,94E-03	1,00E-01	15	0	6	1	0	0	13	81	55	72	48	42	22	3	4,00	-0,13	4,13	SPATS2L	-	-	uc002uvn.4:201253967:201342754:+;uc010fst.3:201253967:201342754:+;uc002uvo.4:201281133:201342754:+;uc002uvp.4:201253967:201342754:+;uc002uvq.4:201253967:201342754:+;uc002uvr.4:201253967:201342754:+;uc010zhc.2:201173795:201342754:+
chrX:71821118-71821168:mpeak_78348|chrX_71801025_71934029_PHKA1_NM_-|	70	4,56	1,4	-3,2	1,25E-03	3,40E-02	7	0	9	0	0	0	157	206	125	124	90	117	5,02	#DIV/0!	Inf	0,56	Inf	PHKA1	-	-	uc004eax.4:71800851:71933728:-;uc004eay.4:71800851:71933728:-;uc011mqi.2:71800851:71933728:-
chr6:150142983-150143098:mpeak_66431|chr6_150141839_150185480_LRP11_NM_-|	153	4,56	1,4	-3,3	9,35E-04	2,95E-02	12	1	16	0	0	1	283	348	389	234	320	230	3	0	5,42	0,38	5,04	LRP11	-	chr6_149821889_-;chr6_149821944_-	uc003qng.2:150141684:150185156:-
chr14:38063036-38063142:mpeak_22474|chr14_38061916_38064325_FOXA1_NM_-|	164	4,56	0,7	-6,6	4,73E-11	9,38E-08	29	36	12	8	11	6	78	92	45	605	571	477	36	2	1,63	-2,95	4,58	FOXA1	chr14:38063034:-;chr14:38063061:-	chr14_37593831_-;chr14_37593872_-	uc001wuf.4:38060569:38064177:-
chr12:102419745-102419795:mpeak_18666|chr12_102406970_102455902_CCDC53_NM_-|	24	4,54	1,6	-2,8	4,44E-03	7,00E-02	9	0	6	0	0	0	22	79	55	32	42	44	14	#DIV/0!	Inf	0,39	Inf	CCDC53	chr12:102419752:-	-	uc010svw.2:102406885:102455740:-
chr1:116944287-116944337:mpeak_3991|chr1_116915794_116947037_ATP1A1_NM_+|	3112	4,54	1,7	-2,7	6,70E-03	9,05E-02	0	0	13	0	0	0	3798	8882	7865	5690	4393	6706	0	#DIV/0!	Inf	0,29	Inf	ATP1A1	chr1:116944338:+	chr1_116401679_+;chr1_116401715_+	uc010owv.1:116926716:116946596:+;uc010oww.2:116916851:116947066:+;uc010owx.2:116926716:116947066:+;uc001ege.3:116916133:116947066:+
chr11:70050892-70050949:mpeak_13820|chr11_70049268_70052238_FADD_NM_+|	124	4,53	1,0	-4,7	3,02E-06	8,15E-04	9	1	4	4	2	1	30	77	46	408	419	485	10	0	1,22	-3,10	4,31	FADD	chr11:70050944:+	chr11_70204837_+;chr11_70204856_+	uc001opm.2:70049565:70052579:+
chrX:70587124-70587200:mpeak_78303|chrX_70586088_70749562_TAF1_NR_+mpeak_78303|chrX_70586088_70683673_TAF1_NM_+||	73	4,52	0,9	-4,8	1,68E-06	6,23E-04	23	10	8	0	3	2	50	109	53	224	198	191	19	1	3,18	-1,53	4,71	TAF1	chrX:70587179:+	chrX_71367328_+	uc004dzt.4:70586164:70683896:+;uc004dzu.4:70586164:70683896:+
chr2:175260952-175261003:mpeak_44158|chr2_175260456_175292440_SCRN3_NM_+|	9	4,49	2,2	-2,1	3,72E-02	2,45E-01	13	0	3	0	0	0	2	39	13	24	9	6	43	#DIV/0!	Inf	0,45	Inf	SCRN3	chr2:175261005:+	chr2_174396275_+	uc010zen.2:175260484:175292623:+
chr22:23525858-23525908:mpeak_49393|chr22_23522551_23657619_BCR_NM_+|	18	4,49	1,9	-2,3	2,00E-02	1,70E-01	0	0	14	1	0	0	15	29	40	27	44	50	51	3	3,42	-0,52	3,94	BCR	-	-	uc002zww.3:23523147:23657709:+;uc002zwx.3:23523147:23657709:+
chr5:162898412-162898478:mpeak_62350|chr5_162887516_162918117_HMMR_NM_+|	8	4,48	1,8	-2,5	1,40E-02	1,40E-01	36	6	3	7	3	1	0	5	2	1	22	13	420	30	2,07	-2,33	4,39	HMMR	-	-	uc003lzh.3:162887698:162918170:+;uc003lzf.3:162887698:162918170:+;uc003lzg.3:162887698:162918170:+;uc011dem.2:162887732:162918170:+
chr2:44170219-44170280:mpeak_41192|chr2_44115795_44223144_LRPPRC_NM_-|	492	4,47	1,4	-3,2	1,59E-03	3,78E-02	7	8	13	1	0	0	721	1783	811	918	1161	480	1	0	4,35	0,37	3,97	LRPPRC	chr2:44170226:-	chr2_43943088_-	uc002rtr.2:44115738:44223086:-;uc010yob.1:44128460:44222983:-
chr4:42080226-42080330:mpeak_56334|chr4_41992522_42088098_SLC30A9_NM_+|	55	4,46	1,5	-3,0	2,89E-03	5,43E-02	14	1	6	0	0	0	163	167	90	61	109	44	5,17	#DIV/0!	Inf	0,97	Inf	SLC30A9	-	chr4_42078266_+;chr4_42078322_+;chr4_42078363_+	uc003gwl.3:41992668:42088143:+;uc011byx.2:42041053:42088143:+
chr14:31823904-31823961:mpeak_22279|chr14_31762818_31889788_HEATR5A_NM_-|	15	4,43	1,7	-2,6	8,19E-03	1,02E-01	0	8	6	0	0	0	24	43	29	45	14	15	22	#DIV/0!	Inf	0,37	Inf	HEATR5A	chr14:31823903:-	chr14_31354698_-	uc010ami.3:31762510:31856329:-;uc001wrg.1:31792771:31856329:-;uc001wrf.4:31762510:31872181:-;uc010tpk.1:31803606:31872181:-
chr12:80061248-80061305:mpeak_18228|chr12_79986473_80084790_PAWR_NM_-|	67	4,43	1,4	-3,1	1,91E-03	4,15E-02	0	5	19	3	1	0	37	122	61	170	227	155	16	1	2,74	-1,33	4,07	PAWR	chr12:80061247:-	chr12_79667473_-	uc001syx.3:79986386:80084024:-
chr9:5803066-5803124:mpeak_74067|chr9_5787308_5833081_ERMP1_NM_-|	450	4,42	1,5	-3,0	2,67E-03	5,13E-02	0	3	14	0	0	0	945	1190	1229	628	683	714	1	#DIV/0!	Inf	0,73	Inf	ERMP1	chr9:5803071:-	chr9_5803073_-	uc003zjm.1:5787143:5833027:-;uc010mhs.1:5787143:5811279:-
chr6:13608371-13608421:mpeak_63278|chr6_13574760_13612021_SIRT5_NM_+|	38	4,42	1,7	-2,6	9,80E-03	1,13E-01	0	0	11	0	0	0	52	94	85	64	59	85	14	#DIV/0!	Inf	0,16	Inf	SIRT5	-	-	uc003nax.3:13591975:13612097:+;uc011dit.2:13584342:13612097:+;uc003nay.3:13584342:13612097:+
chr7:158567279-158567329:mpeak_70688|chr7_158526943_158622319_ESYT2_NM_-|	178	4,41	1,6	-2,8	5,05E-03	7,52E-02	0	0	11	0	0	0	277	424	435	341	314	332	3	#DIV/0!	Inf	0,20	Inf	ESYT2	-	chr7_158774562_-	uc003woc.1:158534215:158590755:-;uc003wob.1:158526897:158622253:-;uc003wod.1:158540884:158622253:-
chr5:130840343-130840475:mpeak_61204|chr5_130762984_130970929_RAPGEF6_NM_-|	15	4,40	1,5	-2,9	3,35E-03	5,81E-02	20	13	13	38	39	12	0	1	0	23	10	13	1202	194	-0,97	-5,19	4,22	RAPGEF6	-	-	uc003kvo.2:130762958:130970723:-;uc010jdi.2:130762958:130970723:-;uc010jdj.2:130762958:130970723:-;uc003kvn.2:130762958:130970723:-;uc003kvq.3:130771643:130843856:-;uc003kvr.3:130771643:130970723:-;uc010jdk.3:130799729:130970723:-;uc003kvp.2:130762958:131132614:-
chr1:206702492-206702551:mpeak_6840|chr1_206680862_206760157_RASSF5_NM_+|	15	4,40	1,3	-3,3	9,18E-04	2,93E-02	7	0	10	0	2	2	3	10	13	36	37	58	97	4	2,21	-2,32	4,52	RASSF5	-	-	uc001hec.1:206680935:206758081:+;uc001hed.3:206680935:206760310:+;uc001hee.3:206680935:206760180:+
chr2:118707066-118707122:mpeak_43073|chr2_118677972_118771739_CCDC93_NM_-|	28	4,39	1,3	-3,4	7,34E-04	2,53E-02	1	6	12	4	0	0	19	28	30	51	78	110	25	5	2,23	-1,64	3,87	CCDC93	chr2:118707061:-	chr2_117949490_-	uc002tlj.3:118677918:118771571:-;uc010fld.2:118694273:118771739:-
chr4:40596237-40596324:mpeak_56265|chr4_40428160_40631883_RBM47_NM_-|	127	4,39	1,5	-2,9	3,52E-03	5,97E-02	13	5	0	1	0	0	205	268	203	261	328	243	4	0	3,72	-0,30	4,02	RBM47	chr4:40596233:-	chr4_40594218_-	-
chr5:162910024-162910186:mpeak_62352|chr5_162887516_162918117_HMMR_NM_+|	6	4,37	2,1	-2,1	3,87E-02	2,51E-01	16	6	2	0	6	0	0	5	2	1	22	13	230	49	2,07	-2,33	4,39	HMMR	chr5:162910178:+	-	uc003lzh.3:162887698:162918170:+;uc003lzf.3:162887698:162918170:+;uc003lzg.3:162887698:162918170:+;uc011dem.2:162887732:162918170:+
chr19:45758928-45758978:mpeak_38958|chr19_45754515_45805631_MARK4_NM_+|	14	4,36	1,7	-2,6	8,28E-03	1,02E-01	15	4	1	1	0	0	28	18	27	24	29	25	27	5	3,86	-0,09	3,96	MARK4	chr19:45758979:+	chr19_45255718_+	uc002pba.2:45754846:45805696:+;uc002pbb.2:45754846:45805968:+
chr2:44121723-44121778:mpeak_41186|chr2_44115795_44223144_LRPPRC_NM_-|	492	4,35	1,5	-2,8	4,95E-03	7,42E-02	16	0	9	0	0	1	721	1783	811	918	1161	480	1	0	5,26	0,37	4,88	LRPPRC	-	chr2_43894555_-;chr2_43894627_-	uc002rtr.2:44115738:44223086:-
chr11:108800368-108800431:mpeak_14676|chr11_108535751_108810972_DDX10_NM_+|	12	4,33	1,6	-2,7	6,01E-03	8,44E-02	2	3	8	0	1	0	17	23	15	16	45	19	23	3	3,92	-0,53	4,45	DDX10	-	-	uc001pkm.3:108535880:108811150:+
chrX:153639389-153639443:mpeak_79382|chrX_153631182_153640428_DNASE1L1_NM_-|	39	4,33	1,7	-2,5	1,19E-02	1,26E-01	1	16	1	0	0	0	55	86	140	65	36	62	7	#DIV/0!	Inf	0,78	Inf	DNASE1L1	chrX:153639390:-	chrX_154411010_-;chrX_154411044_-	-
chr1:193020894-193020954:mpeak_6349|chr1_192989586_193029237_UCHL5_NR_-mpeak_6349|chr1_192985525_193028523_UCHL5_NM_-||	88	4,31	1,8	-2,3	1,92E-02	1,65E-01	28	3	0	1	0	0	150	293	181	142	188	76	7	1	4,50	0,62	3,87	UCHL5	-	chr1_193051816_-	uc001gsm.3:192985480:193028390:-;uc001gso.3:192985480:193028390:-;uc001gsp.3:192989472:193028390:-;uc001gsq.3:192987941:193028390:-
chr13:27648997-27649048:mpeak_20436|chr13_27643521_27746033_USP12_NM_-|	43	4,29	1,7	-2,5	1,17E-02	1,26E-01	17	1	0	3	0	0	49	58	50	103	157	81	18	2	2,79	-1,11	3,91	USP12	chr13:27648995:-	chr13_27074860_-	uc001uqy.3:27643419:27745776:-
chr3:37053687-37053737:mpeak_51381|chr3_37034840_37091976_MLH1_NM_+|	265	4,26	1,6	-2,7	7,37E-03	9,48E-02	0	0	11	0	0	0	421	614	741	431	395	567	2	#DIV/0!	Inf	0,35	Inf	MLH1	chr3:37053733:+	chr3_37012241_+	uc003cgl.3:37035038:37092144:+;uc010hge.3:37035038:37092144:+;uc011ayc.2:37042527:37092144:+
chr6:36063799-36063850:mpeak_64301|chr6_35995453_36076156_MAPK14_NM_+|	116	4,25	1,4	-3,0	2,66E-03	5,12E-02	0	0	11	1	0	1	134	138	100	322	325	363	9	0	2,42	-1,44	3,86	MAPK14	-	-	uc011dth.2:35995934:36063852:+;uc003olo.3:35995934:36070479:+;uc003olp.3:35995934:36076224:+;uc003olq.3:35995934:36076224:+;uc003olr.3:35995934:36075393:+;uc011dti.2:36020590:36076224:+
chr4:71826373-71826426:mpeak_56673|chr4_71768056_71847696_MOB1B_NM_+|	8	4,25	1,7	-2,5	1,17E-02	1,26E-01	0	6	9	0	1	0	14	14	9	11	19	14	61	6	4,14	-0,25	4,40	MOB1B	chr4:71826424:+	chr4_70960706_+	uc003hfv.2:71768253:71841038:+;uc011cba.2:71816499:71847774:+;uc003hfw.3:71768253:71847774:+
chr4:42018558-42018610:mpeak_56328|chr4_41992522_42088098_SLC30A9_NM_+|	54	4,20	2,0	-2,1	3,32E-02	2,29E-01	19	0	0	0	0	0	163	167	90	61	109	44	13	#DIV/0!	Inf	0,97	Inf	SLC30A9	chr4:42018611:+	chr4_42016593_+	uc003gwl.3:41992668:42088143:+
chr16:11150492-11150584:mpeak_28146|chr16_11038344_11272191_CLEC16A_NM_+|	40	4,19	1,6	-2,6	8,49E-03	1,03E-01	0	3	12	1	0	0	50	55	112	86	74	83	10	2	3,45	-0,17	3,62	CLEC16A	-	chr16_11056736_+	uc002dan.4:11038574:11220137:+;uc002dao.3:11038574:11272547:+;uc021tcy.1:11038574:11272547:+
chr4:54141672-54141722:mpeak_56469|chr4_53740228_54232242_SCFD2_NM_-|	104	4,16	1,6	-2,5	1,09E-02	1,21E-01	0	0	11	0	0	0	174	274	267	180	125	222	4,54	#DIV/0!	Inf	0,44	Inf	SCFD2	chr4:54141661:-	-	uc003gzu.3:53740135:54232108:-;uc010igm.3:53740135:54232108:-
chr12:6440247-6440302:mpeak_15528|chr12_6438788_6451283_TNFRSF1A_NM_-|	153	4,14	0,9	-4,7	2,51E-06	7,36E-04	0	8	10	3	2	2	96	103	67	459	545	542	10	0	1,46	-2,54	4,00	TNFRSF1A	chr12:6440250:-	chr12_6331086_-	uc001qnt.3:6438477:6442680:-;uc001qnu.3:6438477:6450980:-;uc010sez.2:6438477:6442680:-;uc009zek.3:6438477:6450980:-
chr11:47761058-47761184:mpeak_12728|chr11_47739064_47788993_FNBP4_NM_-|	10	4,14	1,7	-2,5	1,33E-02	1,36E-01	3	0	20	1	3	7	0	4	6	27	30	21	248	14	1,16	-3,04	4,20	FNBP4	chr11:47761055:-;chr11:47761132:-	-	uc001ngj.3:47738973:47786855:-;uc009ylv.3:47738973:47788840:-
chr10:104687607-104687657:mpeak_10715|chr10_104678074_104836727_CNNM2_NM_+|	9	4,14	1,5	-2,7	6,42E-03	8,76E-02	3	8	4	0	0	1	9	13	20	19	18	13	37	4	4,52	-0,23	4,75	CNNM2	-	chr10_102927899_+	uc001kwm.3:104678237:104836937:+;uc001kwn.3:104678237:104836937:+
chr2:47612816-47612944:mpeak_41295|chr2_47596286_47613710_EPCAM_NM_+|	1135	4,11	1,4	-3,0	2,84E-03	5,38E-02	3	19	4	0	1	0	3121	2605	2312	2038	1754	1758	0	0	4,94	0,53	4,41	EPCAM	chr2:47612868:+	chr2_47385727_+;chr2_47385800_+	uc002rvx.3:47596644:47613752:+
chr22:40746028-40746080:mpeak_50062|chr22_40742503_40762439_ADSL_NM_+|	110	4,08	1,8	-2,2	2,62E-02	1,99E-01	0	24	0	0	2	0	202	182	177	228	225	275	13	1	3,82	-0,38	4,20	ADSL	chr22:40746082:+	chr22_40350076_+	uc003ayp.4:40742562:40762526:+;uc003ays.4:40742562:40762526:+
chr1:10002679-10002727:mpeak_427|chr1_9990515_10002826_LZIC_NM_-|	44	4,06	1,4	-2,8	5,00E-03	7,48E-02	8	6	3	0	0	0	186	86	66	59	56	56	5,13	#DIV/0!	Inf	0,98	Inf	LZIC	-	-	uc010oah.2:9990456:10002793:-
chr20:30960296-30960359:mpeak_46653|chr20_30946146_31022234_ASXL1_NM_+|	27	4,03	0,8	-5,3	1,32E-07	7,86E-05	10	13	12	7	6	14	3	8	8	89	81	78	186	11	0,40	-3,71	4,11	ASXL1	chr20:30960356:+	chr20_32372570_+	uc002wxs.3:30946578:31025141:+;uc021wbw.1:30946578:31025141:+;uc010geb.3:30956848:31025141:+
chr11:68034585-68034635:mpeak_13717|chr11_68030386_68039469_C11orf24_NM_-|	138	4,03	1,4	-2,9	3,74E-03	6,20E-02	0	5	9	1	0	0	199	321	291	257	287	287	3	0	3,41	-0,03	3,45	C11orf24	chr11:68034585:-	chr11_68267119_-	-
chr5:130994655-130994705:mpeak_61215|chr5_130980456_131132756_FNIP1_NM_-|	29	4,02	1,3	-3,1	1,90E-03	4,14E-02	3	0	9	0	3	0	26	14	26	74	84	112	30	4	1,93	-2,05	3,97	FNIP1	-	chr5_131658966_-	uc003kvp.2:130762958:131132614:-;uc003kvs.1:130980377:131132614:-;uc003kvt.1:130980377:131132614:-
chr6:53787093-53787150:mpeak_64830|chr6_53659777_53787432_LRRC1_NM_+|	69	3,96	1,0	-3,8	1,43E-04	1,19E-02	2	31	22	0	3	2	122	74	95	164	165	151	19	2	3,38	-0,72	4,10	LRRC1	chr6:53787143:+	chr6_53922345_+	uc003pcd.1:53660054:53787591:+
chr19:16942829-16942888:mpeak_37750|chr19_16940197_16989307_SIN3B_NM_+|	70	3,96	1,6	-2,5	1,09E-02	1,21E-01	0	0	15	0	0	3	52	70	82	170	207	244	22	1	2,50	-1,60	4,09	SIN3B	chr19:16942889:+	chr19_16832077_+	uc002new.3:16940231:16965076:+;uc002ney.2:16940231:16989538:+;uc002nez.2:16940231:16989538:+
chr1:16928865-16928965:mpeak_722|chr1_16890681_16940100_NBPF1_NM_-|	120	3,95	1,1	-3,7	2,34E-04	1,48E-02	10	0	8	4	4	0	47	99	50	504	383	327	14	1	1,15	-2,63	3,79	NBPF1	chr1:16928885:-	-	-
chr9:109628371-109628424:mpeak_75690|chr9_109625377_109773103_ZNF462_NM_+|	9	3,94	2,0	-2,0	4,56E-02	2,75E-01	1	0	12	0	0	0	16	33	9	8	15	9	33	#DIV/0!	Inf	0,82	Inf	ZNF462	-	-	-
chr17:2291333-2291389:mpeak_31105|chr17_2290943_2304258_MNT_NM_-|	22	3,92	1,2	-3,3	1,01E-03	3,04E-02	3	0	11	1	2	1	10	21	14	80	47	70	46	2	1,71	-2,09	3,79	MNT	-	-	uc002fur.3:2290194:2304006:-
chr15:45723242-45723290:mpeak_25530|chr15_45722726_45725145_C15orf48_NM_+|	8	3,90	1,9	-2,0	4,10E-02	2,60E-01	23	0	1	1	0	1	3	14	11	16	7	22	132	9	3,20	-0,68	3,88	C15orf48	-	-	uc001zvg.4:45722994:45725214:+;uc001zvh.4:45722994:45725214:+
chr21:45497618-45497668:mpeak_48840|chr21_45432205_45523173_TRAPPC10_NM_+|	67	3,89	1,5	-2,6	9,55E-03	1,12E-01	0	0	12	0	1	1	78	114	82	188	142	181	13	0	3,01	-0,90	3,91	TRAPPC10	-	-	uc010gpo.3:45483495:45523412:+;uc002zea.3:45432374:45523412:+
chr15:40270021-40270077:mpeak_25072|chr15_40226324_40327227_EIF2AK4_NM_+|	16	3,86	1,5	-2,6	8,34E-03	1,03E-01	6	11	7	1	0	0	23	55	29	14	26	23	23	6	4,17	0,78	3,39	EIF2AK4	chr15:40270073:+	chr15_39977870_+	uc010bbj.1:40254054:40327285:+;uc001zkm.1:40226396:40327285:+
chr2:101630334-101630384:mpeak_42667|chr2_101624735_101767846_TBC1D8_NM_-|	12	3,86	1,4	-2,8	5,88E-03	8,39E-02	9	1	5	0	2	1	8	23	9	16	30	46	40	4	2,73	-1,22	3,95	TBC1D8	-	-	uc002tau.4:101624282:101666960:-;uc010fiv.3:101624282:101767715:-
chr1:180366642-180366696:mpeak_6085|chr1_180257652_180472022_ACBD6_NM_-|	41	3,84	1,4	-2,8	5,41E-03	7,96E-02	2	11	4	0	1	0	76	104	72	73	71	73	7	1	4,35	0,22	4,13	ACBD6	-	-	uc001gog.3:180257497:180471401:-
chr16:67077976-67078028:mpeak_29653|chr16_67063049_67132612_CBFB_NM_+|	155	3,83	1,6	-2,4	1,45E-02	1,43E-01	40	6	0	1	2	0	266	372	328	224	362	263	7	1	3,92	0,19	3,73	CBFB	chr16:67078031:+	-	uc002era.3:67063310:67132635:+;uc002erb.3:67063310:67132681:+;uc010vja.2:67063310:67132681:+
chr12:39735829-39735939:mpeak_16399|chr12_39688319_39837192_KIF21A_NM_-|	37	3,83	1,9	-2,0	4,40E-02	2,72E-01	23	16	0	1	6	0	9	97	4	128	107	54	54	4	2,45	-1,39	3,84	KIF21A	chr12:39735835:-	-	uc001rly.3:39688225:39836772:-;uc001rlx.3:39688225:39836772:-;uc001rlz.3:39688225:39836772:-;uc010skl.2:39688225:39836772:-
chr3:160665686-160665749:mpeak_54378|chr3_160473995_160786598_PPM1L_NM_+|	20	3,82	1,2	-3,2	1,30E-03	3,41E-02	68	14	9	9	2	3	17	13	14	18	33	39	204	15	2,71	-1,01	3,72	PPM1L	-	chr3_160947947_+	uc003fdr.3:160474096:160786945:+;uc003fdt.3:160560062:160786945:+
chr13:96335303-96335353:mpeak_21463|chr13_96329392_96443126_DNAJC3_NM_+|	75	3,82	1,7	-2,2	2,55E-02	1,96E-01	0	0	11	0	0	0	165	263	128	74	163	93	6	#DIV/0!	Inf	0,75	Inf	DNAJC3	-	-	uc001vmp.3:96329509:96395199:+;uc001vmq.3:96329509:96443284:+
chr9:88969180-88969227:mpeak_75062|chr9_88903659_88969402_ZCCHC6_NM_-|	9	3,82	1,5	-2,6	9,57E-03	1,12E-01	13	5	6	4	1	0	6	3	13	28	7	17	114	14	2,31	-1,30	3,62	ZCCHC6	-	-	-
chr11:118888413-118888463:mpeak_14981|chr11_118886468_118889057_RPS25_NM_-|	56	3,81	1,7	-2,3	2,19E-02	1,79E-01	0	0	12	0	0	0	131	142	155	92	81	61	8	#DIV/0!	Inf	0,87	Inf	RPS25	chr11:118888408:-	chr11_119017703_-	uc001pun.2:118886554:118888994:-
chr2:38524956-38525043:mpeak_41038|chr2_38523255_38604432_ATL2_NR_-mpeak_41038|chr2_38523732_38604432_ATL2_NM_-||	12	3,80	1,4	-2,8	5,11E-03	7,58E-02	16	16	10	12	26	8	0	4	0	24	8	17	378	94	-0,12	-3,71	3,59	ATL2	chr2:38524948:-	chr2_38297819_-	uc010ynm.2:38523624:38603321:-;uc010ynn.2:38523135:38603321:-;uc010yno.2:38523624:38545766:-;uc002rqq.3:38523135:38604402:-;uc002rqr.3:38523135:38545766:-;uc002rqs.3:38523624:38604402:-
chr19:4357029-4357080:mpeak_36850|chr19_4343523_4359912_MPND_NM_+|	29	3,80	1,6	-2,3	2,10E-02	1,74E-01	21	3	2	0	0	1	69	42	94	41	51	21	13	2	5,26	0,87	4,39	MPND	chr19:4357030:+;chr19:4357080:+	chr19_4357033_+;chr19_4357083_+	uc002mae.3:4343590:4359999:+;uc002mag.3:4343590:4359999:+
chr10:93711146-93711220:mpeak_10127|chr10_93683735_93788546_BTAF1_NM_+|	13	3,80	1,7	-2,2	3,00E-02	2,15E-01	21	0	6	11	8	3	0	9	1	26	60	13	288	22	0,33	-3,38	3,71	BTAF1	-	chr10_91951439_+	uc001khr.3:93683833:93788690:+
chr10:16487027-16487104:mpeak_8394|chr10_16478941_16553044_PTER_NM_+|	16	3,80	1,5	-2,5	1,34E-02	1,36E-01	3	0	9	1	0	0	30	34	27	28	35	26	21	5	3,25	0,04	3,21	PTER	chr10:16487112:+	-	-
chr3:37170562-37170647:mpeak_51392|chr3_37095452_37217851_LRRFIP2_NM_-|	30	3,79	1,4	-2,6	8,49E-03	1,03E-01	6	0	11	3	0	0	47	60	29	65	90	47	18	4	2,62	-0,57	3,19	LRRFIP2	-	-	uc011ayf.1:37095341:37190474:-;uc003cgp.2:37095341:37190474:-;uc003cgs.3:37095341:37190474:-;uc003cgt.3:37095341:37190474:-
chr10:134540765-134540852:mpeak_11468|chr10_134351352_134595540_INPP5A_NM_+|	75	3,75	0,7	-5,0	5,32E-07	2,63E-04	14	16	15	0	5	3	104	49	86	209	198	201	19	2	2,55	-1,35	3,90	INPP5A	chr10:134540818:+;chr10:134540853:+	-	uc001llo.1:134351600:134591361:+;uc001llp.3:134351600:134595445:+;uc001llq.3:134459398:134595445:+
chr11:22850811-22850861:mpeak_12237|chr11_22844679_22851382_SVIP_NM_-|	83	3,73	1,4	-2,6	9,30E-03	1,10E-01	0	9	6	0	0	0	183	299	199	74	88	132	3	#DIV/0!	Inf	1,21	Inf	SVIP	chr11:22850802:-	-	uc001mqp.4:22844664:22851294:-
chr3:57898282-57898438:mpeak_52224|chr3_57742982_57913022_SLMAP_NM_+|	10	3,70	1,9	-2,0	4,93E-02	2,87E-01	9	11	5	0	2	0	13	31	2	16	25	1	55	12	3,93	0,14	3,78	SLMAP	-	chr3_57912604_+;chr3_57912674_+	uc003djg.1:57850352:57911655:+;uc011bez.1:57882607:57913115:+;uc011bfa.1:57882607:57913115:+;uc003djh.3:57882607:57902882:+;uc003dji.1:57882607:57911655:+;uc011bfb.1:57882607:57913115:+;uc011bfc.1:57882607:57911655:+;uc003djd.1:57743378:57913115:+;uc003dje.1:57743378:57913115:+;uc003djf.1:57743378:57913115:+
chr11:71166394-71166446:mpeak_13886|chr11_71164216_71212347_NADSYN1_NM_+|	59	3,68	1,4	-2,6	8,95E-03	1,07E-01	7	10	4	1	0	0	108	103	207	76	71	120	4,94	2	3,93	0,65	3,28	NADSYN1	chr11:71166447:+	chr11_71455400_+	uc001oqn.3:71164342:71212398:+
chr5:141314145-141314212:mpeak_61900|chr5_141303384_141318085_KIAA0141_NM_+|	43	3,67	1,3	-2,9	4,31E-03	6,84E-02	10	0	6	1	0	1	80	60	74	73	85	121	12	1	3,07	-0,37	3,44	KIAA0141	chr5:141314220:+	chr5_141934654_+	uc003lls.3:141303506:141318324:+;uc003llt.3:141303506:141318324:+
chr21:45380582-45380651:mpeak_48819|chr21_45285115_45402184_AGPAT3_NM_+|	373	3,66	1,5	-2,5	1,19E-02	1,26E-01	1	1	12	0	1	0	1120	577	838	670	588	667	1	0	4,12	0,40	3,72	AGPAT3	chr21:45380653:+	chr21_43960789_+	uc002zdv.3:45379562:45402273:+;uc002zdw.3:45379562:45402273:+;uc002zdx.3:45374910:45402273:+
chr17:37487526-37487576:mpeak_32750|chr17_37417820_37557909_FBXL20_NM_-|	21	3,65	1,1	-3,4	6,41E-04	2,34E-02	22	11	6	3	0	2	23	44	21	34	41	50	45	6	3,08	-0,49	3,57	FBXL20	-	-	uc002hrt.3:37417712:37557655:-;uc010cvu.3:37417712:37557655:-
chr10:101978752-101978813:mpeak_10490|chr10_101949384_101989344_CHUK_NM_-|	38	3,65	1,1	-3,3	9,17E-04	2,93E-02	9	6	18	1	2	1	30	96	55	108	63	63	19	2	3,18	-0,38	3,56	CHUK	-	-	uc001kqp.3:101949354:101989289:-
chr16:27242568-27242618:mpeak_28759|chr16_27236557_27280113_NSMCE1_NM_-|	83	3,64	1,6	-2,3	1,93E-02	1,66E-01	0	1	13	0	0	1	210	171	174	107	172	151	4	0	4,41	0,37	4,04	NSMCE1	chr16:27242567:-	chr16_27231247_-	uc002doi.1:27236477:27268891:-
chr15:91137084-91137215:mpeak_27212|chr15_91073117_91185163_CRTC3_NM_+|	21	3,64	1,1	-3,3	9,26E-04	2,94E-02	13	9	15	0	0	5	10	34	30	38	53	48	50	10	2,97	-0,91	3,88	CRTC3	chr15:91137139:+;chr15:91137214:+	chr15_90593902_+;chr15_90593995_+	uc002bpn.4:91073303:91141726:+;uc002bpp.4:91073303:91185372:+;uc002bpo.4:91073303:91185372:+
chr1:39918429-39918493:mpeak_1882|chr1_39549838_39951209_MACF1_NM_+|	37	3,63	1,6	-2,3	2,01E-02	1,70E-01	16	5	0	1	1	0	52	88	60	45	111	67	16	1	3,28	-0,15	3,43	MACF1	-	-	uc031pme.1:39903469:39951466:+;uc031pmc.1:39549890:39951466:+;uc021olt.1:39549890:39951466:+
chr4:187114102-187114152:mpeak_58629|chr4_187112673_187131622_CYP4V2_NM_+|	9	3,63	1,5	-2,4	1,46E-02	1,43E-01	7	3	9	1	0	1	17	5	19	11	14	25	44	6	3,17	-0,25	3,42	CYP4V2	chr4:187114151:+	chr4_186192996_+;chr4_186193061_+	uc003iyw.4:187112977:187131795:+
chr11:33163481-33163543:mpeak_12359|chr11_33106835_33183037_CSTF3_NM_-|	82	3,63	1,3	-2,8	4,69E-03	7,18E-02	3	11	3	0	0	2	38	164	140	204	187	233	5,18	1	3,14	-0,87	4,00	CSTF3	-	-	uc001mui.3:33163125:33182871:-;uc001muj.3:33163424:33182871:-;uc001muh.3:33106632:33182871:-
chr1:113617480-113617529:mpeak_3768|chr1_113615791_113666496_LRIG2_NM_+|	16	3,63	1,0	-3,5	4,42E-04	2,04E-02	13	8	17	7	3	11	12	4	2	26	42	50	210	18	0,82	-2,74	3,56	LRIG2	-	-	uc001edf.1:113616028:113666723:+
chr8:140897255-140897306:mpeak_73517|chr8_140743471_141468678_TRAPPC9_NM_-|	232	3,62	1,4	-2,6	9,97E-03	1,14E-01	10	6	1	0	1	0	396	516	704	324	313	511	1	0	4,43	0,49	3,94	TRAPPC9	chr8:140897241:-	-	uc003yvj.2:140743303:141461472:-;uc003yvh.2:140743303:141468663:-
chr17:79253495-79253549:mpeak_35140|chr17_79220473_79269139_SLC38A10_NM_-|	153	3,60	1,3	-2,7	6,94E-03	9,18E-02	5	8	5	1	0	0	312	321	432	219	203	328	2	1	3,67	0,51	3,17	SLC38A10	chr17:79253499:-	chr17_81279699_-	uc002jzy.1:79219355:79258666:-;uc002jzz.1:79219355:79268721:-;uc002kab.3:79225014:79268721:-
chr17:58022755-58022828:mpeak_33973|chr17_57970406_58023911_RPS6KB1_NM_+|	597	3,57	1,5	-2,4	1,69E-02	1,53E-01	16	3	2	0	0	1	2007	1622	904	685	1240	686	0	0	4,97	0,80	4,17	RPS6KB1	-	chr17_59945467_+	uc010wom.3:57987940:58024149:+;uc010ddj.3:57970545:58024963:+;uc002ixy.4:57970545:58024149:+;uc010won.3:57970545:58024149:+;uc010woo.2:57990048:58024149:+
chr2:159948264-159948315:mpeak_43771|chr2_159825145_160086088_TANC1_NM_+|	47	3,56	1,2	-2,9	3,41E-03	5,85E-02	0	14	3	0	3	1	28	30	56	168	160	105	22	2	1,82	-1,92	3,74	TANC1	chr2:159948315:+	chr2_159091803_+	uc010fol.1:159922422:160035672:+;uc010fom.1:159922422:160084476:+;uc010zcm.2:159922422:160086129:+;uc002uag.3:159922422:160087523:+
chr7:72875707-72875762:mpeak_68523|chr7_72856023_72936615_BAZ1B_NM_-|	69	3,56	1,1	-3,3	1,08E-03	3,12E-02	6	16	6	0	5	0	59	130	56	230	187	128	12	3	2,50	-1,15	3,65	BAZ1B	chr7:72875710:-	chr7_73461382_-	uc003tyc.3:72856525:72936263:-
chr12:46878794-46878847:mpeak_16585|chr12_46777458_47046172_LOC100288798_NR_+|	6	3,56	1,6	-2,2	2,97E-02	2,14E-01	8	5	6	0	1	0	16	8	9	3	11	5	59	13	4,54	0,80	3,74	LOC100288798	chr12:46878846:+	chr12_46485062_+	-
chr10:128821461-128821522:mpeak_11364|chr10_128593977_129249595_DOCK1_NM_+|	8	3,55	1,6	-2,2	2,77E-02	2,06E-01	19	20	4	5	1	4	2	3	5	0	19	9	428	24	2,04	-1,50	3,54	DOCK1	-	chr10_127023208_+	uc031pxq.1:128821375:128823194:+;uc001ljt.3:128594086:129249691:+;uc010qun.2:128594086:129249691:+
chr6:31860943-31860994:mpeak_64036|chr6_31848041_31865484_EHMT2_NM_-|	158	3,55	1,2	-2,9	3,24E-03	5,75E-02	2	6	10	0	0	1	275	291	360	234	309	410	2	0	3,80	-0,04	3,84	EHMT2	chr6:31860943:-	chr6_31893167_-	uc011don.1:31847860:31864979:-;uc003nxz.1:31847860:31865454:-;uc003nya.1:31847860:31865454:-
chr11:125496449-125496511:mpeak_15190|chr11_125495030_125525119_CHEK1_NR_+mpeak_15190|chr11_125495030_125545822_CHEK1_NM_+||	15	3,55	1,2	-3,1	2,20E-03	4,49E-02	12	15	8	3	0	1	22	28	25	12	31	26	46	7	3,36	0,11	3,25	CHEK1	-	-	uc010sbh.2:125495655:125525215:+
chr5:176675218-176675331:mpeak_62639|chr5_176560079_176720832_NSD1_NM_+|	40	3,55	1,2	-3,0	2,97E-03	5,49E-02	9	10	0	3	0	2	35	50	32	114	118	106	25	2	2,04	-1,52	3,56	NSD1	-	-	uc003mft.4:176562171:176722460:+;uc003mfr.4:176562104:176722460:+;uc003mfs.1:176562104:176707835:+;uc011dfx.2:176619013:176722460:+
chr16:87986050-87986166:mpeak_30639|chr16_87985037_88110195_BANP_NM_+|	116	3,55	0,8	-4,4	1,07E-05	2,06E-03	22	9	13	20	5	5	71	54	31	362	385	411	28	3	0,55	-2,89	3,44	BANP	-	-	-
chr12:57454679-57454779:mpeak_17551|chr12_57453842_57472574_NEMP1_NM_-|	42	3,53	1,2	-3,0	2,49E-03	4,94E-02	7	6	5	3	0	0	68	84	71	80	92	86	8	3	2,76	-0,21	2,97	NEMP1	-	-	uc010sra.2:57453661:57457104:-;uc001smy.3:57453661:57472528:-;uc001smx.3:57453661:57472528:-
chr16:22087327-22087391:mpeak_28601|chr16_22019455_22092016_C16orf52_NM_+|	17	3,53	1,4	-2,6	9,79E-03	1,13E-01	0	21	8	0	2	3	23	10	17	31	45	38	87	7	2,54	-1,16	3,70	C16orf52	chr16:22087380:+	chr16_22076089_+	uc002dkd.2:22019622:22092201:+
chr1:155943091-155943204:mpeak_5264|chr1_155917806_155948336_ARHGEF2_NM_-|	47	3,53	0,9	-3,7	1,90E-04	1,32E-02	12	9	9	0	8	1	26	54	37	157	96	152	25	3	1,81	-1,80	3,61	ARHGEF2	-	-	uc001fms.2:155917732:155948218:-;uc001fmt.2:155917732:155948218:-;uc010pgu.1:155931452:155955186:-;uc001fmu.2:155917732:155955186:-
chr22:29447381-29447446:mpeak_49580|chr22_29279754_29449566_ZNRF3_NM_+mpeak_49580|chr22_29279754_29449566_ZNRF3_NM_+||	50	3,51	0,8	-4,6	3,37E-06	8,70E-04	16	13	22	12	8	13	17	18	25	188	70	192	86	8	0,59	-2,92	3,51	ZNRF3	-	-	uc021wnq.1:29383063:29449610:+;uc003aeg.3:29279754:29449610:+
chr1:155648898-155649049:mpeak_5214|chr1_155630724_155658823_YY1AP1_NM_-|	238	3,51	0,5	-6,6	2,95E-11	8,77E-08	448	240	244	46	74	79	128	155	216	374	407	443	187	16	2,23	-1,29	3,52	YY1AP1	-	chr1_155679202_-	uc010pgh.2:155629447:155649291:-;uc009wqt.3:155629447:155649291:-;uc001flh.3:155629447:155658255:-;uc010pgi.2:155629447:155658255:-;uc009wqx.3:155631019:155658255:-;uc010pgk.2:155638560:155658255:-;uc001fll.3:155629447:155650227:-;uc001flk.3:155629447:155649291:-;uc001flm.3:155629447:155649291:-;uc009wqw.3:155629447:155649291:-;uc001flj.3:155629447:155650227:-;uc001fli.3:155629447:155650227:-;uc0…
chr7:141325607-141325657:mpeak_70236|chr7_141251077_141352586_AGK_NM_+|	41	3,51	1,4	-2,4	1,50E-02	1,44E-01	0	5	14	0	2	0	56	99	85	55	87	93	12	2	3,52	0,03	3,50	AGK	chr7:141325658:+	chr7_141625852_+	uc003vwi.2:141255266:141352724:+
chr17:77753487-77753541:mpeak_35001|chr17_77751976_77757530_CBX2_NM_+|	179	3,51	0,8	-4,5	7,89E-06	1,62E-03	13	15	6	0	11	5	86	81	133	565	481	750	11	1	1,07	-2,58	3,66	CBX2	chr17:77753538:+	chr17_79779739_+	uc002jxb.2:77752034:77755948:+;uc002jxc.3:77752034:77758841:+
chr12:56307533-56307676:mpeak_17314|chr12_56296139_56321697_WIBG_NM_-|	91	3,51	0,8	-4,4	1,32E-05	2,30E-03	36	21	29	9	1	17	76	53	79	292	242	241	42	4	1,64	-1,90	3,54	WIBG	chr12:56307530:-;chr12:56307610:-	chr12_55913726_-;chr12_55913810_-;chr12_55913873_-	uc001sie.1:56295655:56320893:-;uc001sif.1:56295655:56321545:-
chr15:42200404-42200454:mpeak_25257|chr15_42193379_42264755_EHD4_NM_-|	19	3,50	1,5	-2,3	2,00E-02	1,70E-01	8	0	6	3	0	0	23	23	39	72	24	36	25	6	2,37	-0,63	3,00	EHD4	chr15:42200357:-;chr15:42200402:-	chr15_41908206_-	uc001zot.3:42192842:42264692:-
chr18:55712646-55712730:mpeak_36291|chr18_55711609_56063398_NEDD4L_NM_+|	32	3,49	1,3	-2,6	8,24E-03	1,02E-01	20	0	20	1	0	4	30	62	37	54	73	77	47	4	2,89	-0,66	3,56	NEDD4L	chr18:55712703:+;chr18:55712732:+	chr18_58045482_+	uc002lgy.3:55711892:56063501:+;uc002lgz.3:55711892:56063501:+;uc002lgx.3:55711892:56063501:+
chr18:13543566-13543633:mpeak_35619|chr18_13218728_13645125_LDLRAD4_NM_+|	34	3,48	1,4	-2,5	1,38E-02	1,39E-01	26	140	81	23	36	64	6	0	0	15	14	3	1411	398	1,00	-2,41	3,41	LDLRAD4	chr18:13543622:+	chr18_13543622_+	uc002ksb.3:13387721:13645656:+;uc031rhm.1:13387721:13645656:+;uc031rhn.1:13387721:13645656:+
chr9:37781924-37781974:mpeak_74613|chr9_37780877_37785089_EXOSC3_NM_-|	54	3,47	1,3	-2,8	5,58E-03	8,15E-02	3	0	16	1	0	5	52	31	53	139	158	183	21	2	1,68	-1,81	3,49	EXOSC3	chr9:37781924:-;chr9:37781972:-	chr9_37781926_-	uc004aal.3:37780675:37785041:-;uc004aam.3:37780856:37785041:-
chr7:140098212-140098268:mpeak_70193|chr7_140035304_140098350_SLC37A3_NM_-|	35	3,46	1,1	-3,2	1,30E-03	3,41E-02	15	5	30	4	3	1	59	33	60	42	61	113	33	3	2,78	-0,50	3,28	SLC37A3	-	-	-
chr17:1724441-1724505:mpeak_31040|chr17_1684733_1733175_SMYD4_NM_-|	50	3,44	0,9	-4,0	6,47E-05	7,69E-03	15	20	6	4	8	3	43	18	41	158	105	183	40	4	1,37	-2,13	3,50	SMYD4	chr17:1724451:-	chr17_1821161_-	uc002ftm.4:1684579:1731288:-
chr11:73839950-73840000:mpeak_14050|chr11_73724570_73882064_C2CD3_NM_-|	20	3,43	1,3	-2,7	6,35E-03	8,72E-02	6	4	6	1	1	0	24	48	30	42	43	35	16	3	2,87	-0,23	3,10	C2CD3	-	-	uc001ouv.2:73824615:73881837:-;uc001ouu.2:73745642:73881837:-
chr13:28225365-28225432:mpeak_20464|chr13_28194879_28239822_POLR1D_NM_+|	67	3,42	1,3	-2,6	8,72E-03	1,05E-01	2	11	4	0	2	0	106	153	118	116	83	209	4,77	1	3,41	-0,12	3,53	POLR1D	-	chr13_27651288_+	uc010aam.3:28222573:28240090:+;uc001urp.3:28196120:28240090:+
chr5:95108355-95108405:mpeak_60479|chr5_95066849_95128762_RHOBTB3_NM_+|	181	3,42	1,4	-2,5	1,34E-02	1,36E-01	5	5	6	0	0	1	352	560	404	239	428	175	1	0	4,59	0,64	3,95	RHOBTB3	chr5:95108406:+	chr5_95772701_+	uc003klm.3:95067386:95128878:+
chr3:136320785-136320835:mpeak_53726|chr3_136057119_136471245_STAG1_NM_-|	9	3,42	1,4	-2,4	1,48E-02	1,44E-01	10	10	2	3	0	1	7	20	9	11	20	17	64	11	2,75	-0,42	3,17	STAG1	chr3:136320784:-	chr3_136601925_-	uc003era.1:136057095:136349740:-;uc003erb.1:136057095:136349740:-;uc003ere.3:136237234:136349740:-
chr16:89358093-89358155:mpeak_30765|chr16_89353521_89556969_ANKRD11_NR_-mpeak_30765|chr16_89335071_89556969_ANKRD11_NM_-||	25	3,41	1,1	-3,2	1,42E-03	3,50E-02	19	11	4	1	12	3	14	20	6	57	81	73	86	8	1,05	-2,40	3,45	ANKRD11	-	-	uc002fnb.1:89345479:89358185:-;uc002fnd.3:89354875:89371640:-;uc002fmy.2:89334885:89383427:-;uc002fmx.2:89334885:89383427:-;uc002fnc.2:89334885:89383427:-;uc002fne.4:89353512:89371640:-
chr12:4430422-4430478:mpeak_15490|chr12_4430358_4461425_TIGAR_NM_+|	51	3,41	1,5	-2,3	2,30E-02	1,84E-01	8	0	19	4	0	0	44	156	65	96	113	106	15	4	2,73	-0,25	2,98	TIGAR	-	-	uc001qmp.3:4430437:4461857:+
chr7:132720441-132720491:mpeak_69960|chr7_132470421_132766828_CHCHD3_NM_-|	40	3,40	1,3	-2,7	6,54E-03	8,91E-02	3	5	9	1	0	1	30	113	35	114	88	77	10	1	2,67	-0,65	3,32	CHCHD3	chr7:132720404:-;chr7:132720454:-	-	uc011kpn.1:132658736:132766697:-;uc003vre.3:132470397:132766697:-;uc022alw.1:132470397:132766697:-
chr15:36907602-36907685:mpeak_25025|chr15_36871803_37100524_C15orf41_NM_+|	263	3,40	1,2	-2,8	4,72E-03	7,20E-02	505	609	624	389	491	522	1	1	0	12	5	2	47787	7284	0,31	-2,99	3,30	C15orf41	-	-	uc001zje.4:36872061:37100654:+
chr20:18515376-18515438:mpeak_46412|chr20_18488187_18541294_SEC23B_NM_+|	571	3,39	1,3	-2,7	7,11E-03	9,30E-02	14	0	6	0	0	1	931	1523	1183	962	991	1237	1	0	3,93	0,19	3,74	SEC23B	chr20:18515429:+	chr20_18534782_+	uc010zsb.2:18491479:18541384:+;uc002wra.2:18491479:18541384:+;uc002wrb.2:18491479:18541384:+;uc002wqz.2:18491479:18541384:+;uc002wrc.2:18491479:18541384:+
chr3:52702596-52702664:mpeak_52070|chr3_52582251_52719866_PBRM1_NM_-|	88	3,39	0,7	-4,7	2,60E-06	7,36E-04	22	31	36	3	4	5	97	191	109	174	244	136	23	2	2,95	-0,48	3,43	PBRM1	-	-	uc003der.2:52582078:52713727:-;uc003des.2:52582078:52713727:-;uc003det.2:52582078:52713727:-;uc003deu.2:52582078:52713727:-;uc003dew.2:52582078:52713727:-;uc010hmk.1:52582078:52713727:-;uc003deq.2:52582078:52713727:-;uc003dey.2:52582078:52713727:-;uc003dez.1:52588740:52713727:-
chr19:55591336-55591394:mpeak_39725|chr19_55587220_55598895_EPS8L1_NM_+|	155	3,38	1,4	-2,3	1,90E-02	1,64E-01	0	29	3	1	0	2	219	257	371	266	280	427	6	1	3,24	-0,20	3,44	EPS8L1	-	chr19_55080024_+	uc010yfr.2:55591132:55598982:+;uc010ess.1:55583565:55597560:+;uc010est.1:55587812:55595150:+;uc002qis.4:55587812:55598982:+
chr21:38559341-38559391:mpeak_48540|chr21_38445570_38573740_TTC3_NM_+|	20	3,38	1,5	-2,2	2,77E-02	2,06E-01	9	8	2	0	0	0	78	65	27	18	19	12	11	#DIV/0!	Inf	1,79	Inf	TTC3	-	chr21_37187064_+	uc002yvz.3:38459557:38573875:+;uc002ywa.3:38459557:38573875:+;uc002ywb.3:38459557:38573875:+;uc010gnf.3:38467667:38573875:+;uc002ywc.3:38494146:38573875:+
chr17:27837883-27838019:mpeak_32303|chr17_27717942_27869578_TAOK1_NM_+|	81	3,38	1,0	-3,2	1,20E-03	3,33E-02	14	5	11	8	1	0	135	54	80	218	274	177	11	2	1,74	-1,31	3,05	TAOK1	-	-	uc002heb.1:27807458:27838025:+;uc002hdz.2:27778566:27870040:+;uc010wbe.2:27778566:27870040:+
chr12:99047762-99047814:mpeak_18549|chr12_99039077_99126197_APAF1_NM_+|	10	3,38	1,5	-2,3	2,33E-02	1,85E-01	12	21	15	8	5	0	0	11	4	12	12	15	215	50	1,87	-1,40	3,27	APAF1	chr12:99047816:+	chr12_98654036_+	uc001tfy.3:99042137:99126344:+;uc001tfz.3:99042137:99126344:+;uc001tga.3:99042137:99126344:+;uc001tgb.3:99042137:99126344:+;uc001tgc.3:99042137:99126259:+
chr4:7050744-7050802:mpeak_55751|chr4_7045155_7055788_TADA2B_NM_+|	55	3,37	0,6	-5,4	7,98E-08	5,92E-05	23	24	42	5	11	5	59	44	56	119	141	127	56	5	2,08	-1,28	3,35	TADA2B	chr4:7050801:+	chr4_7049073_+	uc003gjw.4:7045306:7056781:+;uc010idi.3:7045306:7056781:+
chr12:102159536-102159592:mpeak_18646|chr12_102141019_102224645_GNPTAB_NM_-|	29	3,37	1,3	-2,5	1,08E-02	1,20E-01	5	4	12	1	1	0	57	62	55	31	86	37	12	2	3,18	0,17	3,01	GNPTAB	chr12:102159539:-	chr12_101765762_-	uc001tit.3:102140941:102224453:-
chr3:142031434-142031484:mpeak_53897|chr3_142030655_142166904_XRN1_NM_-|	34	3,36	1,6	-2,1	3,29E-02	2,29E-01	6	0	16	4	0	0	55	77	25	81	112	34	21	5	2,42	-0,53	2,95	XRN1	-	-	uc010huu.3:142030352:142131499:-;uc003eus.3:142030352:142166786:-;uc003eut.3:142030352:142166786:-;uc003euu.3:142030352:142166786:-
chr4:13627157-13627317:mpeak_55853|chr4_13571752_13629328_BOD1L1_NM_-|	16	3,36	1,2	-2,9	3,62E-03	6,07E-02	13	21	25	18	8	12	6	9	0	27	45	15	271	43	0,67	-2,57	3,24	BOD1L1	chr4:13627160:-;chr4:13627265:-	chr4_13625536_-	uc003gmz.1:13571634:13629211:-
chr2:171906579-171906699:mpeak_44022|chr2_171850466_172087824_TLK1_NM_-|	18	3,34	1,3	-2,7	7,87E-03	9,96E-02	16	10	23	1	8	0	13	20	20	14	61	32	93	14	2,33	-1,00	3,33	TLK1	-	-	uc002ugr.1:171902679:171910351:-;uc010zdn.1:171850289:171923393:-;uc002ugn.2:171850289:172016938:-;uc002ugo.2:171850289:172016938:-;uc002ugp.2:171850289:171974362:-
chr7:64259832-64259886:mpeak_68333|chr7_64254765_64312176_ZNF138_NR_+mpeak_68333|chr7_64254765_64291828_ZNF138_NM_+||	6	3,33	1,4	-2,3	1,88E-02	1,64E-01	5	10	6	1	1	0	12	8	9	8	6	10	76	14	3,27	0,21	3,06	ZNF138	chr7:64259883:+	chr7_64799526_+	uc011kdp.3:64254946:64291864:+;uc031sxl.1:64254946:64292580:+;uc031sxm.1:64254946:64291864:+;uc011kdq.3:64254946:64292580:+;uc003ttg.4:64254946:64276008:+
chr15:90142549-90142602:mpeak_27127|chr15_90118817_90170186_TICRR_NM_+|	22	3,33	1,4	-2,3	2,04E-02	1,71E-01	10	0	0	3	4	9	2	6	4	97	73	49	243	7	-0,64	-4,08	3,44	TICRR	-	chr15_89599371_+	uc002boe.3:90118817:90170317:+;uc021sug.1:90118817:90170317:+
chr7:102960049-102960115:mpeak_69386|chr7_102953090_102985320_DNAJC2_NM_-|	12	3,32	1,6	-2,0	4,15E-02	2,61E-01	27	10	1	11	18	1	1	5	3	12	30	28	414	42	0,36	-2,95	3,31	DNAJC2	-	chr7_103319649_-	uc003vbn.3:102953015:102960249:-;uc003vbo.3:102953015:102985069:-;uc010lix.3:102953015:102985069:-;uc003vbp.3:102953015:102960249:-
chr9:102784318-102784433:mpeak_75555|chr9_102744995_102861334_ERP44_NM_-|	64	3,31	1,3	-2,5	1,25E-02	1,30E-01	24	0	4	3	2	0	99	107	111	154	155	115	14	2	2,71	-0,42	3,13	ERP44	-	chr9_100022126_-	uc004bam.3:102744893:102861122:-
chr5:179437907-179437965:mpeak_62871|chr5_179382669_179499118_RNF130_NM_-|	26	3,31	1,3	-2,5	1,22E-02	1,28E-01	5	1	12	3	1	0	20	63	31	70	38	66	15	3	2,30	-0,61	2,91	RNF130	chr5:179437914:-	chr5_180010915_-;chr5_180010952_-	uc003mll.1:179382653:179498702:-;uc003mlm.1:179382664:179498702:-
chr12:69776993-69777134:mpeak_18007|chr12_69753489_69783926_YEATS4_NM_+|	25	3,31	1,3	-2,5	1,16E-02	1,26E-01	1	4	9	0	3	0	14	44	43	61	63	60	14	4	2,42	-0,86	3,29	YEATS4	-	-	uc001sux.3:69753752:69784096:+
chr17:66111599-66111662:mpeak_34506|chr17_66097695_66121725_LINC00674_NR_+|	210	3,31	1,2	-2,7	6,41E-03	8,76E-02	7	16	3	1	1	0	582	468	394	399	291	353	2	0	3,58	0,47	3,11	LINC00674	chr17:66111654:+;chr17:66111680:+	-	-
chr14:89728774-89728837:mpeak_24068|chr14_89629313_90085494_FOXN3_NM_-|	11	3,28	1,5	-2,2	2,56E-02	1,97E-01	0	10	5	1	1	0	14	20	16	16	21	21	45	6	2,78	-0,24	3,02	FOXN3	chr14:89728792:-	chr14_89262430_-	uc001xxn.4:89628757:89878820:-;uc001xxo.4:89628757:89878820:-;uc010atk.3:89628757:89878820:-
chr12:119617435-119617494:mpeak_19380|chr12_119616594_119631503_HSPB8_NM_+|	153	3,28	1,6	-2,1	3,68E-02	2,44E-01	24	0	5	7	3	1	30	325	53	841	243	300	11	1	1,45	-1,76	3,21	HSPB8	-	-	uc001txb.3:119617117:119631663:+
chr21:47821596-47821642:mpeak_49028|chr21_47744035_47865196_PCNT_NM_+|	69	3,26	1,0	-3,2	1,38E-03	3,46E-02	13	4	7	5	1	0	57	114	101	209	196	125	9	2	1,93	-0,96	2,89	PCNT	-	-	uc002zji.4:47744142:47865240:+;uc002zjj.3:47754397:47865240:+
chr19:36584229-36584286:mpeak_38411|chr19_36545782_36595669_WDR62_NM_+|	30	3,26	1,1	-2,9	3,82E-03	6,29E-02	15	8	53	1	9	7	19	16	45	41	55	95	94	9	2,06	-1,24	3,30	WDR62	-	chr19_36093377_+	uc002odd.2:36545873:36595930:+;uc002odc.2:36545873:36595930:+
chr5:72332966-72333016:mpeak_59985|chr5_72251807_72383894_FCHO2_NM_+|	7	3,25	1,3	-2,4	1,57E-02	1,48E-01	7	3	10	5	1	7	1	3	3	8	12	21	299	32	0,60	-2,63	3,23	FCHO2	-	chr5_73037196_+	uc011csk.1:72251923:72333826:+;uc003kcl.3:72251923:72383917:+;uc011csl.2:72251923:72383917:+
chr3:195968534-195968584:mpeak_55167|chr3_195965765_196014584_PCYT1A_NM_-|	10	3,25	1,3	-2,5	1,27E-02	1,32E-01	0	9	6	0	3	2	12	9	4	22	25	32	88	9	1,68	-1,68	3,36	PCYT1A	chr3:195968531:-;chr3:195968576:-	chr3_196241678_-	uc003fwg.3:195965558:195997402:-;uc003fwh.3:195965558:195997402:-
chr11:65040053-65040103:mpeak_13345|chr11_65029322_65064590_POLA2_NM_+|	171	3,23	1,2	-2,7	7,01E-03	9,23E-02	7	0	6	0	2	0	315	260	366	409	309	373	2	0	3,00	-0,21	3,21	POLA2	chr11:65040105:+	chr11_65272630_+	uc009yqf.1:65029763:65047130:+;uc001odj.3:65029763:65064740:+
chr1:150902588-150902656:mpeak_4765|chr1_150898814_150936722_SETDB1_NM_+|	63	3,23	1,0	-3,2	1,18E-03	3,30E-02	8	3	4	0	1	9	22	29	36	232	206	205	17	2	0,55	-2,88	3,43	SETDB1	-	-	uc001evw.4:150900190:150917638:+;uc009wmf.2:150900190:150923564:+;uc009wmg.2:150900190:150936322:+;uc001evv.2:150900190:150936840:+;uc001evu.2:150900190:150936840:+
chr11:33767946-33768002:mpeak_12388|chr11_33763630_33796071_FBXO3_NM_-|	37	3,21	1,3	-2,5	1,15E-02	1,25E-01	2	6	20	0	0	3	42	88	73	78	84	43	14	4	3,42	-0,02	3,44	FBXO3	-	-	uc010rej.2:33763453:33770431:-;uc001muy.3:33763453:33790415:-;uc001muz.3:33763453:33796043:-
chr5:131951683-131951812:mpeak_61249|chr5_131892615_131977869_RAD50_NM_+|	16	3,21	1,4	-2,2	2,58E-02	1,97E-01	9	13	2	1	2	1	12	49	5	26	44	23	37	4	2,70	-0,49	3,19	RAD50	-	-	uc003kxi.3:131893016:131978056:+;uc003kxh.3:131915060:131978056:+
chr12:122262340-122262390:mpeak_19586|chr12_122242637_122267971_SETD1B_NM_+|	213	3,21	0,9	-3,4	7,11E-04	2,50E-02	1	0	10	11	3	3	66	79	66	758	751	803	8	1	-0,57	-3,45	2,88	SETD1B	-	chr12_121824505_+	uc001ubi.3:122242643:122268145:+
chr9:5092352-5092412:mpeak_74031|chr9_4985244_5126683_JAK2_NM_+|	42	3,20	0,8	-3,8	1,29E-04	1,12E-02	128	128	85	12	12	21	15	30	7	15	34	15	650	72	2,91	-0,27	3,18	JAK2	chr9:5092410:+	-	uc010mhm.3:5021987:5126791:+;uc003ziw.3:5021987:5126791:+
chr2:235861783-235861912:mpeak_45694|chr2_235860627_235962235_SH3BP4_NM_+|	59	3,19	1,0	-3,4	7,90E-04	2,67E-02	2	20	37	5	7	7	33	58	69	173	156	145	38	4	1,62	-1,57	3,18	SH3BP4	chr2:235861834:+	chr2_234953203_+;chr2_234953268_+	-
chr7:45701963-45702083:mpeak_68141|chr7_45613738_45753291_ADCY1_NM_+|	29	3,18	1,3	-2,5	1,38E-02	1,39E-01	8	11	0	3	0	1	52	35	30	72	60	79	25	3	2,27	-0,84	3,11	ADCY1	chr7:45702004:+;chr7:45702096:+	chr7_45662414_+;chr7_45662483_+	uc003tnd.3:45632393:45703974:+;uc003tne.4:45614142:45753594:+
chr5:70358521-70358634:mpeak_59915|chr5_70331623_70363497_GTF2H2_NM_-|	28	3,17	1,3	-2,4	1,86E-02	1,63E-01	0	8	14	7	2	2	10	43	8	108	76	53	54	4	1,07	-1,95	3,03	GTF2H2	-	-	uc003kav.4:70331503:70358590:-;uc003kau.4:70331503:70358590:-;uc003kay.1:70351150:70358590:-;uc003kat.1:70265930:70406597:-
chr3:195250490-195250589:mpeak_55106|chr3_195243740_195270224_PPP1R2_NM_-|	34	3,15	1,4	-2,2	2,67E-02	2,02E-01	10	3	3	1	0	1	27	113	53	53	90	54	8	2	2,97	-0,02	2,99	PPP1R2	chr3:195250490:-	chr3_195523694_-	uc003fup.3:195243693:195269848:-
chr11:66799083-66799161:mpeak_13619|chr11_66790189_66816054_SYT12_NM_+|	99	3,14	1,0	-3,3	9,93E-04	3,02E-02	14	18	3	3	3	1	211	135	125	200	243	240	7	1	2,54	-0,54	3,08	SYT12	chr11:66799152:+	chr11_67031680_+	uc009yrl.3:66797615:66816228:+;uc001oju.3:66797615:66816228:+
chr12:133267937-133267996:mpeak_20044|chr12_133264191_133281204_PXMP2_NM_+|	165	3,14	1,0	-3,1	1,73E-03	3,85E-02	9	24	11	0	1	1	493	410	360	207	227	240	3	0	4,33	0,91	3,42	PXMP2	chr12:133267993:+	chr12_132691402_+	uc001ukt.3:133264256:133281273:+
chr15:40862196-40862271:mpeak_25139|chr15_40861491_40865725_RPUSD2_NM_+|	41	3,13	0,8	-3,9	9,67E-05	9,42E-03	6	14	17	24	14	27	2	9	12	131	120	113	158	18	-0,81	-3,96	3,15	RPUSD2	chr15:40862266:+	chr15_40570064_+	uc021sjh.1:40861536:40866460:+;uc001zmd.1:40861536:40866460:+
chr5:112204040-112204093:mpeak_60813|chr5_112196884_112227299_SRP19_NM_+|	13	3,13	1,2	-2,6	1,04E-02	1,18E-01	17	6	6	3	1	1	20	28	12	15	36	13	51	7	2,84	-0,09	2,94	SRP19	chr5:112204092:+	chr5_112868393_+	uc011cvu.2:112197073:112227304:+
chr15:63943448-63943511:mpeak_26182|chr15_63901465_64126147_HERC1_NM_-|	35	3,12	1,3	-2,4	1,56E-02	1,47E-01	19	16	5	3	2	1	21	133	33	107	53	33	21	3	2,98	-0,04	3,02	HERC1	-	-	uc002amp.3:63901279:64067822:-
chr20:61559970-61560031:mpeak_47972|chr20_61513766_61569304_DIDO1_NM_-|	44	3,12	1,3	-2,4	1,84E-02	1,62E-01	7	0	3	0	9	4	26	5	8	236	149	85	38	4	-0,43	-3,61	3,17	DIDO1	chr20:61559973:-	chr20_62928622_-;chr20_62928685_-	-
chr21:46567145-46567256:mpeak_48939|chr21_46494492_46645461_ADARB1_NR_+mpeak_48939|chr21_46494492_46641932_ADARB1_NM_+||	9	3,12	1,4	-2,2	3,00E-02	2,15E-01	7	4	11	0	0	5	6	9	10	5	26	21	87	27	2,20	-1,08	3,28	ADARB1	chr21:46567255:+	chr21_45147340_+	-
chr9:5092135-5092194:mpeak_74030|chr9_4985244_5126683_JAK2_NM_+|	14	3,11	1,3	-2,4	1,61E-02	1,49E-01	13	23	6	5	0	1	15	30	7	15	34	15	80	16	2,64	-0,27	2,91	JAK2	-	-	uc010mhm.3:5021987:5126791:+;uc003ziw.3:5021987:5126791:+
chr14:35249294-35249519:mpeak_22376|chr14_35222910_35344853_BAZ1A_NM_-|	14	3,10	1,2	-2,5	1,19E-02	1,26E-01	26	39	12	5	4	2	2	28	6	18	19	9	211	25	2,72	-0,33	3,05	BAZ1A	chr14:35249293:-;chr14:35249322:-	chr14_34780088_-;chr14_34780185_-;chr14_34780258_-	uc001wsk.3:35222713:35343810:-;uc001wsl.3:35222713:35343810:-
chr9:126331613-126331753:mpeak_76254|chr9_126144904_126692417_DENND1A_NM_-|	16	3,09	1,3	-2,3	1,98E-02	1,69E-01	8	4	6	4	0	0	21	9	38	28	33	36	26	12	2,13	-0,52	2,65	DENND1A	chr9:126331614:-;chr9:126331696:-	chr9_123569338_-	uc011lzl.1:126143710:126414360:-;uc004bny.1:126143710:126414360:-;uc004bnz.1:126143710:126692184:-;uc011lzm.1:126143710:126692203:-;uc004boa.1:126164088:126692184:-;uc004bob.1:126164088:126641271:-;uc004boc.3:126176858:126641271:-
chr4:184566400-184566460:mpeak_58571|chr4_184562624_184580372_RWDD4_NM_-|	27	3,09	1,4	-2,2	2,79E-02	2,06E-01	0	8	15	0	3	0	57	59	37	55	61	32	22	5	3,16	0,06	3,10	RWDD4	chr4:184566400:-	chr4_183645251_-	uc003ivt.1:184562588:184580105:-;uc021xvb.1:184562588:184580105:-
chr7:98479370-98479511:mpeak_69044|chr7_98476112_98609693_TRRAP_NM_+|	70	3,07	1,1	-2,7	7,16E-03	9,31E-02	375	170	137	66	28	26	12	4	0	11	6	5	2947	544	2,50	-0,52	3,02	TRRAP	chr7:98479507:+	chr7_98881783_+;chr7_98881804_+;chr7_98881884_+	uc003upp.3:98478773:98609978:+;uc011kis.2:98478773:98609978:+
chr5:70363311-70363525:mpeak_59916|chr5_70331623_70363497_GTF2H2_NM_-|	31	3,07	1,2	-2,5	1,12E-02	1,23E-01	33	3	14	3	10	9	10	43	8	108	76	53	80	9	1,13	-1,95	3,09	GTF2H2	-	chr5_71067683_-	uc003kat.1:70265930:70406597:-
chr21:41160607-41160669:mpeak_48637|chr21_41117333_41173188_IGSF5_NM_+|	8	3,07	1,4	-2,1	3,21E-02	2,26E-01	23	5	7	5	1	0	13	9	4	9	14	8	137	29	2,51	-0,30	2,80	IGSF5	-	-	uc002yyo.3:41117436:41173284:+
chr18:45379618-45379823:mpeak_36119|chr18_45368321_45457517_SMAD2_NM_-|	71	3,07	0,7	-4,1	3,61E-05	4,77E-03	36	70	24	8	5	3	98	128	133	112	140	95	36	5	3,04	0,05	2,99	SMAD2	-	chr18_47853303_-;chr18_47853349_-;chr18_47853392_-	uc002lcy.4:45368197:45423127:-;uc002lcz.4:45368197:45423127:-;uc010xdc.3:45368197:45423127:-;uc010xdd.2:45371604:45423127:-
chr19:9925434-9925493:mpeak_37176|chr19_9922393_9929731_FBXL12_NM_-|	15	3,06	1,2	-2,5	1,42E-02	1,41E-01	20	4	6	7	2	1	6	11	24	31	27	38	72	9	1,69	-1,24	2,92	FBXL12	chr19:9925433:-	chr19_9814758_-	uc002mme.3:9921571:9929489:-
chr17:57969878-57969941:mpeak_33965|chr17_57937785_57970306_TUBD1_NM_-|	110	3,04	0,9	-3,3	9,52E-04	2,98E-02	3	14	6	0	6	0	128	127	149	251	303	327	6	2	2,01	-1,12	3,13	TUBD1	chr17:57969882:-	chr17_59892530_-	-
chr5:61648816-61648869:mpeak_59669|chr5_61601988_61681310_KIF2A_NM_+|	8	3,03	1,5	-2,1	3,75E-02	2,46E-01	0	6	9	3	3	0	12	6	5	18	26	14	97	14	1,51	-1,33	2,84	KIF2A	chr5:61648868:+	chr5_62353039_+	uc003jsx.4:61604334:61681396:+;uc003jsz.4:61602299:61681396:+;uc010iwp.3:61602299:61681396:+;uc003jsy.4:61602299:61681396:+
chr2:201253941-201254009:mpeak_44700|chr2_201170603_201342358_SPATS2L_NM_+|	28	3,03	1,3	-2,3	2,35E-02	1,86E-01	10	3	11	0	0	3	13	81	55	72	48	42	16	5	3,15	-0,13	3,28	SPATS2L	-	-	uc002uvn.4:201253967:201342754:+;uc010fst.3:201253967:201342754:+;uc002uvp.4:201253967:201342754:+;uc002uvq.4:201253967:201342754:+;uc002uvr.4:201253967:201342754:+;uc010zhc.2:201173795:201342754:+
chr6:152341898-152341964:mpeak_66557|chr6_152011630_152419866_ESR1_NM_+|	426	3,02	1,0	-2,9	3,59E-03	6,03E-02	0	13	4	1	3	0	640	410	466	1253	1161	1164	2	0	1,77	-1,24	3,01	ESR1	-	chr6_152020812_+	uc003qom.4:152129047:152420101:+;uc010kin.3:152129047:152420101:+;uc010kio.3:152129047:152420101:+;uc010kip.3:152129047:152420101:+;uc003qon.4:152129047:152420101:+;uc010kir.3:152129047:152420101:+;uc003qoo.4:152129047:152420101:+;uc010kiq.3:152201877:152420101:+;uc011eev.2:152163798:152420101:+;uc011eew.2:152163784:152419869:+;uc010kis.3:152163798:152417823:+;uc021zha.1:152163868:152420101:+;uc0…
chr17:57271053-57271107:mpeak_33849|chr17_57232859_57278923_PRR11_NM_+|	445	3,02	1,1	-2,6	8,51E-03	1,03E-01	23	0	17	1	0	4	1071	634	744	858	1036	954	2	0	2,89	-0,22	3,11	PRR11	-	chr17_59193706_+	uc002ixf.2:57247113:57278992:+
chr19:4429427-4429555:mpeak_36862|chr19_4402659_4442921_CHAF1A_NM_+|	53	3,00	1,5	-2,0	4,30E-02	2,68E-01	20	0	0	3	2	3	26	52	67	138	127	201	41	2	1,35	-1,69	3,04	CHAF1A	-	-	uc002mal.3:4402759:4443022:+
chr16:89356456-89356525:mpeak_30763|chr16_89353521_89556969_ANKRD11_NR_-mpeak_30763|chr16_89335071_89556969_ANKRD11_NM_-||	25	3,00	1,3	-2,2	2,52E-02	1,95E-01	0	19	8	3	2	13	14	20	6	57	81	73	101	8	0,64	-2,40	3,04	ANKRD11	chr16:89356459:-	chr16_89290051_-	uc002fnb.1:89345479:89358185:-;uc002fnd.3:89354875:89371640:-;uc002fmy.2:89334885:89383427:-;uc002fmx.2:89334885:89383427:-;uc002fnc.2:89334885:89383427:-;uc002fne.4:89353512:89371640:-
chr14:23754307-23754361:mpeak_22085|chr14_23746396_23755309_HOMEZ_NM_-|	28	3,00	1,5	-2,1	4,02E-02	2,55E-01	24	16	4	9	11	1	21	0	35	55	63	100	53	10	1,03	-1,98	3,01	HOMEZ	chr14:23754309:-	chr14_23285102_-	uc001wja.2:23744783:23755161:-;uc001wjb.2:23744783:23762785:-
chr16:9199600-9199661:mpeak_28089|chr16_9185536_9210524_C16orf72_NM_+|	79	2,99	0,9	-3,3	9,54E-04	2,98E-02	9	0	9	1	3	5	44	84	45	220	304	217	16	1	0,93	-2,10	3,03	C16orf72	-	chr16_9105803_+	uc002czm.3:9185901:9210769:+
chr19:2233144-2233206:mpeak_36717|chr19_2230611_2236352_PLEKHJ1_NM_-|	98	2,98	1,0	-3,0	2,51E-03	4,95E-02	177	203	245	122	172	216	0	0	4	8	6	20	4815	1491	0,29	-2,98	3,28	PLEKHJ1	chr19:2233152:-	chr19_2233154_-	-
chr5:148878403-148878453:mpeak_62041|chr5_148876423_148931115_CSNK1A1_NM_-|	110	2,97	1,4	-2,2	3,03E-02	2,16E-01	3	21	0	3	3	0	136	164	203	241	286	263	7	1	2,25	-0,65	2,90	CSNK1A1	chr5:148878402:-	chr5_149498840_-	uc011dcb.2:148876415:148899951:-;uc011dcc.3:148876415:148904697:-;uc003lqw.2:148876415:148930527:-;uc003lqx.2:148876415:148930527:-;uc003lqy.2:148876415:148930527:-
chr9:117354823-117354920:mpeak_76004|chr9_117349993_117359849_ATP6V1G1_NM_+|	1565	2,97	0,9	-3,3	1,04E-03	3,05E-02	17	14	9	4	1	0	2874	4343	3584	2081	2837	3011	0	0	3,03	0,45	2,58	ATP6V1G1	-	chr9_114592602_+;chr9_114592623_+	uc004bjc.3:117350118:117360023:+
chr8:131164976-131165032:mpeak_73459|chr8_131067051_131455906_ASAP1_NM_-|	35	2,97	1,2	-2,4	1,54E-02	1,46E-01	3	26	7	3	3	0	85	77	25	65	64	60	20	4	2,83	-0,02	2,84	ASAP1	-	-	uc003ysz.2:131066976:131193080:-;uc011liw.2:131066976:131373953:-;uc003yta.2:131066976:131414189:-
chr3:135806717-135806776:mpeak_53703|chr3_135684514_135863884_PPP2R3A_NM_+|	18	2,97	1,4	-2,1	3,61E-02	2,41E-01	6	28	8	1	2	0	47	29	39	9	41	9	36	8	3,77	0,93	2,84	PPP2R3A	-	-	uc003eqv.2:135720340:135864008:+;uc011blz.2:135745886:135864008:+;uc003eqw.2:135741911:135864008:+
chr17:2295796-2295858:mpeak_31108|chr17_2290943_2304258_MNT_NM_-|	23	2,96	1,1	-2,7	7,15E-03	9,31E-02	8	0	10	1	7	2	10	21	14	80	47	70	59	5	0,85	-2,09	2,94	MNT	-	chr17_2392502_-	uc002fur.3:2290194:2304006:-
chr8:146217343-146217476:mpeak_73911|chr8_146203939_146228285_ZNF252P_NR_-|	30	2,95	1,4	-2,1	3,70E-02	2,44E-01	0	15	23	1	1	1	65	88	54	35	56	20	28	3	3,73	0,90	2,83	ZNF252P	chr8:146217344:-;chr8:146217425:-	chr8_144991959_-;chr8_144992040_-	uc011llo.2:146202524:146225022:-
chr7:66522817-66522876:mpeak_68460|chr7_66461791_66703294_TYW1_NM_+|	31	2,94	1,4	-2,1	3,30E-02	2,29E-01	0	4	11	3	3	0	17	59	27	88	42	116	21	3	1,48	-1,24	2,72	TYW1	-	-	uc003tvn.4:66461965:66703516:+
chr6:53749737-53749788:mpeak_64827|chr6_53659777_53787432_LRRC1_NM_+|	67	2,94	0,9	-3,2	1,36E-03	3,46E-02	6	13	4	3	1	1	122	74	95	164	165	151	8	1	2,17	-0,72	2,89	LRRC1	chr6:53749791:+	chr6_53884990_+	uc003pcd.1:53660054:53787591:+
chr19:35742249-35742303:mpeak_38339|chr19_35739558_35758726_LSR_NM_+|	407	2,94	1,3	-2,2	2,84E-02	2,08E-01	0	5	13	3	0	0	860	679	1254	589	606	871	1	0	2,74	0,44	2,30	LSR	chr19:35742304:+	-	uc002nyl.3:35739781:35758762:+;uc002nym.3:35739781:35758762:+;uc002nyo.3:35739781:35758762:+;uc002nyn.3:35739781:35758762:+;uc010xsr.2:35739781:35758762:+;uc002nyp.3:35739781:35758762:+
chr3:63897811-63897863:mpeak_52329|chr3_63850232_63985125_ATXN7_NM_+|	39	2,92	1,1	-2,6	9,70E-03	1,12E-01	20	0	8	5	2	3	20	47	56	111	107	93	34	3	1,50	-1,34	2,85	ATXN7	-	-	-
chr17:65186266-65186446:mpeak_34441|chr17_65074702_65241319_HELZ_NM_-|	64	2,91	1,0	-2,8	4,69E-03	7,18E-02	17	5	5	7	0	3	80	103	35	180	166	166	13	3	1,55	-1,23	2,77	HELZ	-	-	uc002jfx.4:65074367:65214920:-;uc010wqk.2:65074367:65214920:-
chr11:73221739-73221809:mpeak_14011|chr11_73117789_73309234_FAM168A_NM_-|	73	2,91	0,9	-3,3	8,28E-04	2,73E-02	3	16	12	1	3	1	111	127	138	168	124	175	9	1	2,57	-0,31	2,88	FAM168A	chr11:73221777:-	-	-
chr4:48858982-48859050:mpeak_56409|chr4_48833059_48862741_OCIAD1_NM_+|	558	2,90	1,0	-3,0	3,13E-03	5,62E-02	3	34	12	3	3	3	484	1248	1254	1193	1151	1313	2	0	2,63	-0,29	2,92	OCIAD1	chr4:48859048:+	chr4_48857021_+	uc003gyo.3:48834641:48862779:+;uc003gyq.3:48834641:48862779:+;uc003gyr.3:48834641:48862779:+;uc021xoc.1:48834641:48862779:+;uc010igk.3:48833538:48862779:+
chr13:28224338-28224456:mpeak_20462|chr13_28194879_28239822_POLR1D_NM_+|	69	2,89	1,1	-2,7	7,80E-03	9,92E-02	2	20	12	1	0	3	106	153	118	116	83	209	9	2	2,88	-0,12	3,00	POLR1D	chr13:28224392:+;chr13:28224462:+	chr13_27650254_+;chr13_27650308_+	uc010aam.3:28222573:28240090:+;uc001urp.3:28196120:28240090:+
chr15:102197115-102197225:mpeak_27453|chr15_102194933_102264645_TARSL2_NM_-|	14	2,89	1,0	-2,9	3,75E-03	6,20E-02	28	11	18	5	3	2	17	21	7	23	12	19	124	18	2,53	-0,24	2,76	TARSL2	-	chr15_101656952_-	uc002bxm.3:102194784:102264590:-
chr13:99171492-99171681:mpeak_21552|chr13_99105463_99229405_STK24_NM_-|	113	2,88	1,2	-2,4	1,46E-02	1,43E-01	30	1	10	0	1	7	139	226	158	251	277	258	8	1	2,46	-0,59	3,05	STK24	-	-	uc001vnm.1:99105426:99174106:-;uc001vnn.1:99105426:99229040:-;uc010tim.1:99105426:99229040:-
chr20:17950432-17950489:mpeak_46379|chr20_17949761_17970581_MGME1_NM_+|	38	2,88	1,1	-2,5	1,11E-02	1,22E-01	9	0	9	5	2	0	30	44	53	107	116	77	21	4	1,34	-1,24	2,58	MGME1	-	-	-
chr4:40870981-40871114:mpeak_56293|chr4_40818276_41216635_APBB2_NM_-|	74	2,86	1,2	-2,3	2,20E-02	1,79E-01	2	0	12	0	0	3	147	83	112	195	143	195	6	2	2,37	-0,64	3,01	APBB2	chr4:40870980:-	chr4_40868964_-	uc010ifu.3:40818108:40895395:-;uc003gvl.3:40818108:41035271:-;uc003gvn.3:40818108:41035271:-;uc003gvm.3:40818108:41035271:-
chr9:91954818-91954876:mpeak_75110|chr9_91933387_91973635_SECISBP2_NM_+|	57	2,86	1,1	-2,7	6,82E-03	9,12E-02	31	10	5	1	3	2	57	146	118	116	125	69	14	2	2,98	0,05	2,93	SECISBP2	chr9:91954876:+	chr9_89339953_+	uc004aqj.1:91933491:91973739:+;uc004aqk.1:91934628:91973739:+;uc011ltk.1:91933491:91973739:+;uc010mqo.1:91947868:91973739:+;uc011ltl.1:91940363:91973739:+
chr6:144801055-144801122:mpeak_66305|chr6_144612872_145172124_UTRN_NM_+|	17	2,85	1,3	-2,2	2,88E-02	2,09E-01	14	15	12	0	7	0	22	40	9	23	44	19	58	23	2,61	-0,28	2,89	UTRN	-	chr6_144479970_+	uc003qkt.3:144612964:145172133:+
chr3:48971369-48971429:mpeak_51831|chr3_48956280_49020631_ARIH2_NM_+|	179	2,84	1,3	-2,2	2,85E-02	2,08E-01	0	1	12	0	0	2	273	375	327	328	387	436	2	1	2,75	-0,24	2,99	ARIH2	chr3:48971423:+	chr3_48933996_+	uc003cvb.3:48964991:49020703:+;uc003cvc.3:48964991:49020703:+;uc010hkl.3:48964991:49020703:+
chr11:46811472-46811552:mpeak_12632|chr11_46765815_46867859_CKAP5_NM_-|	141	2,83	1,2	-2,4	1,69E-02	1,53E-01	16	43	10	9	10	0	139	304	97	415	481	164	13	3	1,82	-0,97	2,79	CKAP5	chr11:46811482:-	chr11_46789932_-	uc009ylg.1:46765572:46837864:-;uc001ndi.2:46765572:46842782:-;uc001ndj.2:46765572:46842782:-
chr9:95301756-95301811:mpeak_75206|chr9_95087749_95375300_CENPP_NM_+|	17	2,83	1,3	-2,1	3,46E-02	2,34E-01	5	3	8	1	2	1	3	19	38	31	25	66	25	4	1,78	-1,01	2,80	CENPP	-	-	uc004arz.3:95088280:95375431:+;uc010mqx.3:95099869:95375431:+
chr16:19593348-19593412:mpeak_28519|chr16_19566736_19711699_C16orf62_NM_+|	113	2,83	1,2	-2,4	1,62E-02	1,50E-01	12	0	16	0	1	2	188	229	306	168	147	291	6	1	3,27	0,25	3,01	C16orf62	chr16:19593405:+	chr16_19582082_+	uc002dgm.2:19566784:19628262:+;uc002dgn.3:19566784:19711798:+;uc002dgo.2:19566784:19711798:+
chr10:118711413-118711484:mpeak_11045|chr10_118646077_118886097_SHTN1_NM_-|	56	2,83	1,1	-2,6	1,07E-02	1,19E-01	36	9	10	5	0	1	153	137	86	57	104	77	15	4	3,18	0,66	2,52	SHTN1	chr10:118711417:-	-	uc001lcy.5:118645854:118733387:-;uc010qso.3:118645854:118719733:-;uc010qsq.1:118660047:118719733:-;uc021pzk.1:118643741:118764590:-;uc009xyw.4:118645854:118764590:-;uc001lcz.5:118646065:118764590:-;uc010qsp.1:118660047:118764590:-
chr1:33234447-33234499:mpeak_1545|chr1_33207511_33238465_KIAA1522_NM_+|	45	2,83	1,3	-2,1	3,30E-02	2,29E-01	10	0	10	0	0	5	48	29	91	116	127	107	18	5	1,94	-1,06	3,00	KIAA1522	chr1:33234497:+	chr1_32768893_+	uc001bvv.2:33231370:33238488:+;uc010ohn.1:33231370:33238488:+;uc001bvu.1:33207555:33238488:+;uc010ohm.1:33219690:33238488:+
chr9:140514620-140514676:mpeak_77138|chr9_140513443_140729224_EHMT1_NM_+|	94	2,82	0,9	-3,1	2,03E-03	4,28E-02	5	3	6	3	4	0	72	99	97	318	187	338	5,09	1	0,98	-1,65	2,63	EHMT1	-	-	uc004coa.3:140513480:140678602:+;uc011mfc.2:140513480:140729405:+
chr3:15371830-15371902:mpeak_50985|chr3_15297810_15382901_SH3BP5_NM_-|	282	2,81	1,1	-2,6	1,05E-02	1,18E-01	0	6	10	0	0	2	625	523	518	584	473	646	1	0	3,02	-0,03	3,06	SH3BP5	chr3:15371827:-	chr3_15330327_-	uc003bzp.2:15297592:15373915:-
chr16:69413019-69413102:mpeak_29891|chr16_69390959_69419891_TERF2_NM_-|	111	2,81	0,8	-3,7	2,37E-04	1,48E-02	21	4	28	8	9	7	77	133	89	261	320	373	18	3	1,09	-1,67	2,76	TERF2	chr16:69413037:-	chr16_69379116_-	uc002exd.4:69390800:69419748:-;uc002exe.4:69404343:69419874:-
chr3:121553233-121553287:mpeak_53143|chr3_121489421_121553926_IQCB1_NM_-|	21	2,80	1,2	-2,3	2,31E-02	1,85E-01	3	4	9	4	0	0	22	50	36	38	52	36	15	10	2,04	-0,20	2,24	IQCB1	-	-	-
chr6:144854274-144854399:mpeak_66308|chr6_144612872_145172124_UTRN_NM_+|	16	2,79	1,3	-2,1	3,54E-02	2,38E-01	16	3	8	3	3	0	22	40	9	23	44	19	38	9	2,35	-0,28	2,64	UTRN	-	-	uc003qkt.3:144612964:145172133:+
chr10:12597015-12597075:mpeak_8275|chr10_12391541_12870767_CAMK1D_NM_+|	22	2,79	1,3	-2,2	2,82E-02	2,08E-01	10	3	4	0	0	2	47	23	48	30	38	57	14	5	3,04	-0,09	3,13	CAMK1D	chr10:12597070:+	chr10_12555077_+	uc001iln.3:12391817:12867724:+;uc001ilo.3:12391817:12870886:+
chr1:223990967-223991022:mpeak_7254|chr1_223968596_224033674_TP53BP2_NM_-|	35	2,79	1,2	-2,3	1,91E-02	1,65E-01	21	3	8	1	3	1	16	93	69	66	60	83	18	3	2,59	-0,23	2,81	TP53BP2	-	-	uc001hod.3:223968554:223994634:-;uc010pvb.2:223968554:224033382:-
chr2:99978238-99978294:mpeak_42605|chr2_99953833_100015769_EIF5B_NM_+|	118	2,78	1,1	-2,5	1,23E-02	1,29E-01	7	14	1	3	3	0	121	254	118	250	411	234	4,51	1	1,87	-0,86	2,73	EIF5B	-	chr2_99361750_+;chr2_99361817_+	uc002tab.3:99954017:100015877:+
chr7:42261211-42261280:mpeak_67990|chr7_42006239_42276618_GLI3_NM_-|	23	2,77	0,9	-3,1	2,20E-03	4,49E-02	14	11	12	3	5	7	16	6	35	65	53	52	66	9	1,31	-1,58	2,88	GLI3	chr7:42261215:-	chr7_42221618_-	uc011kbh.2:42003927:42262852:-
chr1:55342463-55342516:mpeak_2508|chr1_55318059_55352921_DHCR24_NM_-|	1689	2,77	1,1	-2,5	1,09E-02	1,21E-01	2	8	8	4	0	0	2833	2437	4630	3262	2698	4386	0	0	2,14	-0,06	2,20	DHCR24	chr1:55342464:-	chr1_54876792_-	uc010ook.1:55317905:55352398:-;uc001cyc.1:55317905:55352792:-
chr17:1726246-1726321:mpeak_31041|chr17_1684733_1733175_SMYD4_NM_-|	52	2,75	0,8	-3,5	4,19E-04	1,99E-02	21	20	7	7	10	13	43	18	41	158	105	183	47	7	0,70	-2,13	2,83	SMYD4	chr17:1726244:-	chr17_1822955_-	uc002ftm.4:1684579:1731288:-
chr1:45102090-45102175:mpeak_2108|chr1_44870959_45116375_RNF220_NM_+|	88	2,74	0,7	-4,2	3,06E-05	4,23E-03	52	24	52	28	19	20	56	39	95	196	186	284	67	10	0,92	-1,81	2,72	RNF220	chr1:45102164:+	chr1_44636442_+;chr1_44636491_+;chr1_44636532_+	uc010okz.2:45097826:45115701:+;uc001cma.1:45101230:45115701:+;uc001clx.2:45097826:45116447:+;uc010okx.1:45079928:45110464:+;uc001clv.1:44877769:45116447:+;uc001clw.1:44877769:45116447:+;uc010oky.1:45079928:45116447:+
chr19:337236-337319:mpeak_36532|chr19_306711_344791_MIER2_NM_-|	22	2,72	1,0	-2,8	5,64E-03	8,18E-02	8	3	18	14	5	9	8	16	6	43	74	60	93	15	0,07	-2,52	2,59	MIER2	chr19:337237:-	chr19_337247_-	uc002lok.1:306689:344782:-
chr16:75338913-75339082:mpeak_30243|chr16_75327940_75467387_CFDP1_NM_-|	77	2,72	1,1	-2,4	1,48E-02	1,44E-01	6	9	22	0	4	3	64	258	60	200	169	128	10	2	2,42	-0,38	2,80	CFDP1	-	chr16_75305125_-;chr16_75305156_-	uc002fdy.3:75327849:75467250:-;uc002fdz.3:75327849:75446605:-
chr3:140955176-140955227:mpeak_53839|chr3_140950666_141011109_PXYLP1_NM_+|	12	2,72	1,3	-2,1	3,68E-02	2,44E-01	3	8	15	3	0	3	3	23	21	22	17	23	56	13	2,28	-0,38	2,66	PXYLP1	chr3:140955231:+	chr3_141236385_+	-
chr16:8891753-8891814:mpeak_28048|chr16_8891669_8941580_PMM2_NM_+|	102	2,71	1,3	-2,0	4,19E-02	2,62E-01	42	5	2	9	0	4	119	165	145	159	260	315	11	3	1,87	-0,78	2,64	PMM2	chr16:8891805:+	-	uc010uye.1:8891739:8900280:+;uc002czf.4:8891739:8941682:+
chr16:71732043-71732097:mpeak_30070|chr16_71683947_71758604_PHLPP2_NM_-|	47	2,71	0,9	-2,9	3,79E-03	6,26E-02	7	6	9	4	1	9	31	52	15	158	128	140	22	3	0,62	-2,12	2,74	PHLPP2	-	-	uc002fay.1:71712653:71748698:-;uc002fax.3:71682792:71748698:-;uc010cgf.3:71682792:71748698:-
chr4:54244492-54244622:mpeak_56472|chr4_54243819_54325468_FIP1L1_NM_+|	71	2,70	1,0	-2,7	7,42E-03	9,52E-02	10	11	1	7	1	4	44	87	56	214	239	174	12	2	0,95	-1,75	2,70	FIP1L1	chr4:54244548:+	chr4_53378379_+	uc003gzx.4:54244005:54294358:+;uc011bzt.1:54244005:54306936:+;uc003gzy.3:54244005:54325616:+;uc011bzu.2:54244005:54325616:+;uc003gzz.3:54244005:54325616:+;uc003haa.3:54244005:55161439:+
chr12:122818564-122818619:mpeak_19650|chr12_122757647_122907116_CLIP1_NM_-|	20	2,70	1,3	-2,1	3,92E-02	2,52E-01	35	19	3	0	6	3	20	49	14	19	41	27	69	15	2,72	-0,06	2,79	CLIP1	-	chr12_122334041_-	uc001ucg.2:122757421:122864999:-;uc001uch.1:122757421:122864999:-;uc001uci.1:122757421:122864999:-;uc001ucj.1:122762700:122845613:-
chr17:73037978-73038028:mpeak_34691|chr17_73028661_73059112_KCTD2_NR_+|	103	2,70	1,0	-2,8	4,89E-03	7,35E-02	20	25	2	3	3	8	110	133	152	218	295	274	12	2	1,83	-0,99	2,82	KCTD2	-	-	-
chr6:7236725-7236791:mpeak_63105|chr6_7107829_7248743_RREB1_NM_+|	58	2,68	1,2	-2,2	2,88E-02	2,09E-01	7	11	0	3	5	0	48	49	81	169	145	179	15	2	1,24	-1,47	2,71	RREB1	-	-	uc021yky.1:7182144:7249201:+;uc003mxb.3:7182144:7249201:+;uc003mxc.3:7182144:7249201:+;uc010jnx.3:7182144:7249201:+;uc021ykz.1:7182144:7249201:+;uc021yla.1:7182144:7248791:+
chr2:219360622-219360683:mpeak_45218|chr2_219319740_219433084_USP37_NM_-|	30	2,67	1,2	-2,2	2,64E-02	2,00E-01	1	13	7	0	0	6	34	36	36	65	56	105	20	8	1,79	-1,09	2,88	USP37	-	-	uc010fvs.1:219319652:219423376:-;uc002vie.2:219319652:219423376:-;uc010zkf.1:219319652:219423376:-;uc002vif.2:219319652:219423376:-;uc002vig.2:219319652:219418387:-
chrX:67730837-67730985:mpeak_78210|chrX_67718623_67751722_YIPF6_NM_+|	79	2,67	1,3	-2,0	4,22E-02	2,64E-01	22	0	6	1	0	1	202	231	142	91	139	119	7	1	3,37	0,72	2,65	YIPF6	chrX:67730888:+;chrX:67730987:+	chrX_68511047_+;chrX_68511141_+	uc004dwz.3:67718908:67751841:+;uc011mph.2:67718908:67751841:+
chr5:56180484-56180548:mpeak_59581|chr5_56110899_56189357_MAP3K1_NM_+|	150	2,67	0,9	-2,9	3,27E-03	5,77E-02	17	9	31	9	13	1	149	221	133	409	477	325	11	2	1,33	-1,27	2,60	MAP3K1	-	chr5_56884716_+	uc003jqw.4:56111400:56189507:+
chr11:85340241-85340315:mpeak_14307|chr11_85339616_85347089_TMEM126B_NM_+|	57	2,67	1,3	-2,0	4,53E-02	2,75E-01	12	0	7	0	2	0	132	179	108	77	109	58	7	2	3,48	0,78	2,70	TMEM126B	chr11:85340312:+	chr11_85629271_+	uc001paq.3:85339651:85346826:+;uc021qog.2:85340285:85347273:+;uc001pap.4:85339651:85347273:+;uc021qoh.2:85339667:85347273:+
chr8:96044361-96044418:mpeak_72567|chr8_96037213_96070036_NDUFAF6_NM_+|	40	2,66	1,2	-2,2	2,92E-02	2,11E-01	7	5	4	3	1	0	44	133	39	76	84	90	7	2	2,14	-0,20	2,34	NDUFAF6	chr8:96044412:+	chr8_95032183_+	uc003yhi.3:95993160:96070165:+;uc003yhj.3:96037236:96070165:+
chr3:63998633-63998696:mpeak_52361|chr3_63996440_64009686_PSMD6_NM_-|	1803	2,66	1,0	-2,7	6,75E-03	9,06E-02	7	3	27	5	1	3	2233	4086	2777	4690	4255	3548	0	0	2,02	-0,46	2,48	PSMD6	chr3:63998644:-	chr3_64012969_-	uc003dlz.2:63996343:64008197:-;uc031saj.1:63996343:64009095:-;uc003dmb.2:63996343:64009095:-;uc003dma.2:63996343:64009095:-;uc003dmd.2:63996343:64009511:-
chr18:2582794-2582852:mpeak_35381|chr18_2571509_2616435_NDC80_NM_+|	13	2,66	1,2	-2,3	2,30E-02	1,84E-01	2	11	9	9	9	16	0	8	2	39	33	18	158	39	-0,60	-3,22	2,62	NDC80	chr18:2582850:+	chr18_2582845_+	uc002kli.3:2572984:2616573:+
chr1:1327656-1327931:mpeak_85|chr1_1322962_1334718_CCNL2_NM_-|	46	2,66	0,8	-3,2	1,28E-03	3,41E-02	51	92	24	70	55	54	7	16	4	51	57	73	603	99	-0,10	-2,71	2,61	CCNL2	chr1:1327673:-;chr1:1327824:-;chr1:1327870:-	chr1_1392223_-;chr1_1392284_-;chr1_1392459_-;chr1_1392482_-	uc001afi.2:1322610:1334686:-
chr11:111675735-111675789:mpeak_14718|chr11_111657244_111742305_ALG9_NM_-|	35	2,65	1,3	-2,1	3,85E-02	2,51E-01	2	3	8	0	0	1	70	57	98	64	48	64	6	2	3,25	0,35	2,90	ALG9	chr11:111675734:-	chr11_111805002_-	uc001ply.3:111657120:111731321:-;uc001plz.3:111657120:111731321:-;uc021qql.1:111657120:111731321:-;uc021qqm.1:111657120:111731321:-;uc010rwn.2:111659169:111742206:-;uc010rwo.2:111657120:111731318:-
chr7:5028684-5028815:mpeak_67205|chr7_5013615_5036240_RNF216P1_NR_+|	39	2,64	1,2	-2,2	3,13E-02	2,21E-01	92	49	25	55	57	68	15	1	0	23	36	48	673	169	-0,12	-2,70	2,58	RNF216P1	-	chr7_4989112_+	-
chr16:68715202-68715271:mpeak_29790|chr16_68678150_68732093_CDH3_NM_+|	1517	2,63	1,0	-2,6	9,73E-03	1,12E-01	19	4	14	5	0	1	2206	3115	4810	2355	2091	3582	0	0	2,60	0,34	2,26	CDH3	chr16:68715259:+	chr16_68681354_+	uc010vli.1:68710292:68732303:+;uc002ewf.2:68679282:68732303:+
chr17:80545337-80545393:mpeak_35281|chr17_80477593_80559178_FOXK2_NM_+|	111	2,62	0,8	-3,1	1,89E-03	4,12E-02	0	13	12	7	7	3	89	82	99	293	304	419	14	2	0,62	-1,92	2,53	FOXK2	chr17:80545394:+	chr17_82587511_+	uc002kfm.1:80477764:80553716:+;uc002kfn.3:80477764:80559375:+;uc010diu.3:80477764:80559280:+
chr13:46039895-46039946:mpeak_20938|chr13_46039029_46108836_COG3_NM_+|	34	2,62	0,9	-3,0	3,09E-03	5,57E-02	22	31	30	1	13	15	15	50	25	73	80	50	93	15	1,51	-1,17	2,68	COG3	chr13:46039949:+	chr13_45465818_+	uc001vai.3:46039171:46067629:+;uc001vak.3:46039171:46108866:+
chr12:120428056-120428109:mpeak_19404|chr12_120427647_120530803_CCDC64_NM_+|	11	2,62	1,1	-2,3	2,05E-02	1,72E-01	12	11	6	16	12	17	1	5	0	20	20	11	317	87	-0,61	-3,05	2,44	CCDC64	-	-	uc001txk.2:120427672:120512390:+;uc001txl.1:120427672:120530965:+
chr2:15770166-15770241:mpeak_40348|chr2_15731744_15770899_DDX1_NM_+|	93	2,61	1,2	-2,2	2,68E-02	2,02E-01	0	8	13	0	0	2	206	239	195	131	158	166	4,81	1	3,35	0,49	2,86	DDX1	-	chr2_15630092_+	uc002rce.4:15732057:15771030:+;uc021vee.2:15732057:15771030:+
chr5:149919278-149919337:mpeak_62090|chr5_149877339_149932774_NDST1_NM_+|	284	2,60	1,2	-2,2	2,99E-02	2,15E-01	37	1	3	3	2	5	467	399	544	580	615	752	3	0	2,19	-0,46	2,65	NDST1	chr5:149919330:+	chr5_150539771_+	uc011dcj.2:149900816:149932894:+;uc003lsk.4:149900816:149932894:+
chr4:95921604-95921682:mpeak_57175|chr4_95679127_96075698_BMPR1B_NM_+|	82	2,60	0,8	-3,2	1,51E-03	3,62E-02	8	68	27	15	14	19	65	83	70	185	248	182	47	8	1,12	-1,49	2,62	BMPR1B	-	-	-
chr12:102120155-102120213:mpeak_18635|chr12_102091416_102122678_CHPT1_NM_+|	295	2,58	1,2	-2,1	3,23E-02	2,26E-01	15	9	1	4	0	0	479	767	805	382	456	622	1	1	2,65	0,49	2,16	CHPT1	-	chr12_101726439_+	uc001tin.3:102091639:102122723:+
chr5:153601942-153601992:mpeak_62178|chr5_153570294_153796373_GALNT10_NM_+|	108	2,57	1,0	-2,6	1,03E-02	1,17E-01	17	5	2	3	3	0	192	174	163	251	249	234	4,67	1	2,02	-0,47	2,50	GALNT10	chr5:153601993:+	chr5_154222436_+	uc003lvg.1:153570426:153766035:+;uc003lvh.3:153570426:153796532:+
chr8:63951209-63951257:mpeak_71951|chr8_63928012_63951610_GGH_NM_-|	114	2,56	1,0	-2,7	7,12E-03	9,30E-02	28	5	17	5	2	1	154	240	342	193	167	220	7	1	2,67	0,35	2,33	GGH	-	-	uc003xuw.3:63927890:63951327:-
chr15:89836166-89836292:mpeak_27104|chr15_89787193_89859627_FANCI_NM_+|	145	2,55	0,9	-2,7	6,90E-03	9,17E-02	16	18	52	3	10	3	107	410	277	309	262	271	11	2	2,47	-0,09	2,55	FANCI	chr15:89836242:+	-	uc010bnp.1:89790878:89859690:+;uc002bnm.1:89790878:89859690:+;uc002bnp.1:89806683:89859690:+;uc002bnq.1:89828389:89859690:+
chr21:38858763-38858898:mpeak_48555|chr21_38739858_38884213_DYRK1A_NM_+|	25	2,55	1,2	-2,2	2,86E-02	2,09E-01	19	3	12	14	11	13	0	20	10	61	76	62	72	19	-0,19	-2,72	2,53	DYRK1A	-	chr21_37486470_+	uc002ywh.1:38845062:38858915:+;uc002ywi.3:38792676:38878610:+;uc002ywj.3:38792676:38884834:+;uc002ywk.3:38792676:38884834:+;uc002ywm.3:38792676:38884257:+
chr15:81221349-81221575:mpeak_26889|chr15_81071683_81241137_CEMIP_NM_+|	51	2,55	0,8	-3,1	1,70E-03	3,85E-02	9	4	14	5	2	6	50	39	66	105	178	133	18	3	1,07	-1,43	2,49	CEMIP	-	-	uc002bfw.1:81166220:81241265:+;uc010unn.1:81166220:81241265:+
chr10:3205112-3205172:mpeak_8051|chr10_3180316_3215033_PITRM1_NM_-|	235	2,55	0,9	-2,8	4,61E-03	7,13E-02	6	14	11	4	1	0	485	476	674	347	380	418	2	1	2,64	0,51	2,12	PITRM1	chr10:3205118:-	chr10_3162930_-	uc001igr.2:3181000:3214964:-;uc009xhv.2:3180222:3214964:-;uc001igt.2:3180222:3214964:-;uc010qah.2:3180222:3214971:-;uc001igu.1:3180428:3214405:-;uc010qai.2:3180428:3212396:-
chr10:75570440-75570524:mpeak_9720|chr10_75562334_75571589_NDST2_NM_-|	20	2,54	0,8	-3,1	1,94E-03	4,20E-02	22	14	17	18	14	6	15	9	6	54	32	34	173	31	0,50	-1,98	2,48	NDST2	chr10:75570445:-	chr10_73810691_-	-
chr11:67440858-67440912:mpeak_13681|chr11_67430870_67448685_ALDH3B2_NM_-|	52	2,54	1,2	-2,1	3,92E-02	2,52E-01	5	3	6	0	0	1	107	122	129	54	100	97	4	2	3,35	0,52	2,83	ALDH3B2	chr11:67440861:-	-	-
chr14:91850804-91850891:mpeak_24139|chr14_91739997_91884188_CCDC88C_NM_-|	115	2,53	0,9	-2,7	6,90E-03	9,17E-02	7	3	8	3	2	1	269	147	144	299	221	281	3	1	1,78	-0,51	2,30	CCDC88C	chr14:91850773:-;chr14:91850807:-;chr14:91850838:-	-	uc010twk.1:91805617:91883134:-;uc021ryl.1:91846208:91883540:-;uc010aty.3:91738968:91884034:-;uc001xzl.4:91846208:91884034:-
chr4:1705243-1705421:mpeak_55468|chr4_1695440_1714468_SLBP_NM_-|	66	2,53	0,7	-3,8	1,68E-04	1,28E-02	37	31	18	18	12	19	43	77	32	189	123	186	57	10	0,83	-1,71	2,54	SLBP	-	chr4_1703599_-;chr4_1703649_-	uc003gdi.1:1695323:1713915:-;uc003gdk.1:1695323:1713915:-;uc011bvf.1:1695323:1713915:-;uc003gdl.1:1695323:1705354:-
chr13:100920932-100921012:mpeak_21613|chr13_100741268_101182351_PCCA_NM_+|	17	2,53	0,9	-3,0	3,06E-03	5,57E-02	15	16	11	1	6	4	24	23	10	32	35	26	74	12	1,91	-0,71	2,61	PCCA	-	-	uc001voo.3:100741374:101182420:+;uc010aga.3:100741374:101182420:+;uc010tiz.2:100741374:101182420:+
chr17:65239903-65239964:mpeak_34446|chr17_65074702_65241319_HELZ_NM_-|	63	2,53	1,3	-2,0	4,31E-02	2,68E-01	16	0	5	4	5	0	80	103	35	180	166	166	15	3	1,23	-1,23	2,46	HELZ	-	-	-
chr14:75913432-75913561:mpeak_23795|chr14_75894508_75935992_JDP2_NM_+|	89	2,51	0,9	-2,9	4,11E-03	6,64E-02	21	28	19	24	11	2	112	55	74	241	308	169	28	5	0,87	-1,57	2,44	JDP2	chr14:75913549:+	chr14_75446864_+	uc010asj.3:75904623:75936178:+;uc010tvb.2:75904623:75936178:+;uc010tvc.2:75904623:75936178:+;uc001xrq.3:75899029:75936178:+
chr17:19835110-19835160:mpeak_32030|chr17_19809545_19881169_AKAP10_NM_-|	11	2,51	1,0	-2,5	1,35E-02	1,37E-01	14	5	14	9	10	6	7	3	4	14	28	13	255	47	0,38	-2,06	2,45	AKAP10	-	-	uc002gwo.4:19809539:19880992:-;uc002gwp.2:19812487:19880926:-;uc010cqw.2:19812493:19880926:-
chr16:9205693-9205833:mpeak_28093|chr16_9185536_9210524_C16orf72_NM_+|	85	2,51	0,8	-3,0	2,65E-03	5,12E-02	30	21	9	8	29	8	44	84	45	220	304	217	35	6	0,44	-2,10	2,54	C16orf72	chr16:9205757:+	chr16_9111899_+	uc002czm.3:9185901:9210769:+
chr14:31602705-31602876:mpeak_22259|chr14_31570273_31676729_HECTD1_NM_-|	108	2,51	1,3	-2,0	4,59E-02	2,75E-01	13	0	15	1	3	3	72	366	97	253	325	144	8	1	2,09	-0,43	2,52	HECTD1	-	-	uc001wrd.1:31582309:31637670:-;uc001wrc.1:31570135:31675142:-
chr6:43395964-43396047:mpeak_64597|chr6_43395291_43417666_ABCC10_NM_+|	45	2,50	1,3	-2,0	4,97E-02	2,89E-01	3	0	9	0	3	0	49	101	107	93	98	82	8	3	2,34	-0,09	2,44	ABCC10	chr6:43396019:+;chr6:43396045:+	chr6_43428305_+	uc003ouy.1:43395716:43417829:+
chr16:9199100-9199169:mpeak_28088|chr16_9185536_9210524_C16orf72_NM_+|	81	2,50	1,2	-2,1	3,90E-02	2,52E-01	0	24	6	5	15	2	44	84	45	220	304	217	26	3	0,43	-2,10	2,52	C16orf72	chr16:9199125:+;chr16:9199163:+	chr16_9105304_+	uc002czm.3:9185901:9210769:+
chr21:46220731-46220781:mpeak_48902|chr21_46191404_46221751_UBE2G2_NM_-|	151	2,49	1,3	-2,0	4,79E-02	2,81E-01	13	8	0	4	1	0	312	268	252	346	205	401	4	1	2,06	-0,19	2,25	UBE2G2	chr21:46220729:-	chr21_44800816_-	uc002zfy.3:46191291:46221663:-
chr1:11136964-11137017:mpeak_524|chr1_11126805_11159967_EXOSC10_NM_-|	91	2,49	1,0	-2,4	1,63E-02	1,50E-01	13	0	5	3	2	1	93	161	185	207	197	225	6	1	1,82	-0,52	2,33	EXOSC10	-	-	uc001asa.3:11126774:11159888:-;uc001asb.3:11126774:11159888:-
chr21:46196768-46196876:mpeak_48899|chr21_46191404_46221751_UBE2G2_NM_-|	151	2,48	0,9	-2,9	4,27E-03	6,82E-02	6	6	16	0	3	2	312	268	252	346	205	401	3	1	2,37	-0,19	2,57	UBE2G2	chr21:46196775:-;chr21:46196823:-	-	uc021wjt.1:46191291:46197247:-;uc002zfx.3:46191291:46207875:-;uc002zfy.3:46191291:46221663:-
chr22:31335637-31335698:mpeak_49696|chr22_31322858_31364483_MORC2_NM_-|	174	2,48	0,9	-2,6	8,30E-03	1,03E-01	7	23	9	5	1	9	99	303	203	430	388	616	6	1	1,29	-1,24	2,53	MORC2	-	-	uc003aje.1:31322789:31346402:-
chr14:21955970-21956059:mpeak_21973|chr14_21945334_21964703_TOX4_NM_+|	163	2,48	0,7	-3,5	5,48E-04	2,13E-02	8	16	12	4	1	7	176	180	289	408	396	454	6	1	1,58	-0,96	2,55	TOX4	chr14:21956045:+	chr14_21487862_+;chr14_21487897_+	uc001waz.3:21945437:21964764:+;uc010tlu.2:21945437:21964764:+
chr4:95986962-95987029:mpeak_57176|chr4_95679127_96075698_BMPR1B_NM_+|	73	2,47	0,9	-2,8	4,82E-03	7,28E-02	7	18	4	7	8	1	65	83	70	185	248	182	13	2	0,94	-1,49	2,44	BMPR1B	chr4:95987029:+	chr4_95065874_+	uc031sgn.1:95972850:96075824:+
chr14:50146191-50146399:mpeak_22618|chr14_50110388_50155098_POLE2_NM_-|	32	2,47	0,8	-3,1	1,79E-03	3,95E-02	44	89	49	23	46	42	6	10	4	32	20	15	903	163	0,72	-1,75	2,47	POLE2	chr14:50146190:-;chr14:50146246:-;chr14:50146283:-;chr14:50146339:-	chr14_49679474_-;chr14_49679545_-	uc001wwu.3:50110369:50154921:-;uc021rsr.1:50110369:50154921:-;uc010ano.3:50116970:50154921:-;uc010anj.1:50033027:50319471:-
chr20:43375790-43375847:mpeak_47116|chr20_43374487_43378769_KCNK15_NM_+|	60	2,46	1,0	-2,4	1,75E-02	1,56E-01	13	18	2	0	1	3	118	101	146	96	98	126	9	2	2,96	0,18	2,77	KCNK15	chr20:43375790:+;chr20:43375842:+	chr20_44747177_+;chr20_44747200_+	uc002xmr.3:43374551:43379479:+
chr16:89383338-89383405:mpeak_30773|chr16_89353521_89556969_ANKRD11_NR_-mpeak_30773|chr16_89335071_89556969_ANKRD11_NM_-||	37	2,46	0,7	-3,5	5,16E-04	2,09E-02	35	39	22	39	35	22	14	20	6	57	81	73	241	46	0,00	-2,40	2,40	ANKRD11	-	-	uc002fnf.1:89367221:89383427:-;uc002fmy.2:89334885:89383427:-;uc002fmx.2:89334885:89383427:-;uc002fnc.2:89334885:89383427:-;uc002fng.1:89367221:89383427:-
chr1:214795418-214795547:mpeak_7051|chr1_214776531_214836933_CENPF_NM_+|	32	2,46	1,1	-2,2	3,04E-02	2,17E-01	6	6	4	4	7	1	21	43	5	92	128	68	23	4	0,37	-2,06	2,43	CENPF	-	chr1_214622187_+;chr1_214622212_+	uc001hkm.3:214787097:214837137:+
chr1:6714163-6714219:mpeak_305|chr1_6695760_6761966_DNAJC11_NM_-|	65	2,46	1,1	-2,3	2,27E-02	1,84E-01	22	5	4	3	3	0	103	123	174	112	110	120	8	2	2,55	0,23	2,33	DNAJC11	chr1:6714166:-	chr1_6654108_-	uc001aof.2:6695734:6761860:-;uc001aog.2:6695734:6761860:-;uc010nzu.1:6695734:6740973:-
chrX:122761538-122761600:mpeak_78965|chrX_122735189_122866904_THOC2_NM_-|	11	2,45	1,1	-2,2	3,04E-02	2,17E-01	6	24	11	7	7	4	6	16	2	18	22	15	167	32	1,21	-1,18	2,38	THOC2	-	-	uc004etu.3:122744786:122866872:-
chr2:136268281-136268345:mpeak_43436|chr2_135958010_136288806_ZRANB3_NM_-|	37	2,45	1,1	-2,3	1,99E-02	1,69E-01	117	36	79	81	27	37	5	10	2	7	31	16	1376	268	0,68	-1,68	2,36	ZRANB3	-	-	-
chr3:176913362-176913417:mpeak_54633|chr3_176743312_176915048_TBL1XR1_NM_-|	122	2,45	1,1	-2,2	3,02E-02	2,16E-01	8	13	1	5	0	0	266	223	220	186	296	244	3	2	2,04	-0,04	2,07	TBL1XR1	chr3:176913366:-	chr3_177195566_-	-
chr11:117110506-117110565:mpeak_14827|chr11_117103340_117155801_RNF214_NM_+|	10	2,44	1,1	-2,1	3,25E-02	2,27E-01	5	8	14	14	13	9	6	0	1	11	19	20	238	70	-0,43	-2,77	2,34	RNF214	-	chr11_117239840_+	uc001pqt.4:117104988:117155867:+;uc010rxf.2:117104988:117155867:+;uc001pqu.3:117104988:117155867:+
chr3:52945008-52945061:mpeak_52102|chr3_52939292_53080089_SFMBT1_NM_-|	28	2,43	0,7	-3,6	2,65E-04	1,62E-02	33	30	22	28	18	31	6	11	12	57	37	54	290	52	0,15	-2,33	2,47	SFMBT1	-	-	uc010hmr.3:52939151:52977573:-;uc003dgh.3:52939151:53003144:-
chr2:48036734-48036797:mpeak_41330|chr2_48035386_48132932_FBXO11_NM_-|	16	2,43	1,1	-2,1	3,35E-02	2,30E-01	14	3	4	8	2	4	5	21	9	43	40	40	58	11	0,54	-1,83	2,37	FBXO11	-	-	uc010fbk.3:48035256:48049425:-;uc010fbl.3:48035256:48066888:-;uc002rwe.3:48035256:48132859:-
chr5:178994515-178994579:mpeak_62772|chr5_178977561_179036376_RUFY1_NM_+|	82	2,42	0,9	-2,6	1,06E-02	1,19E-01	7	3	9	1	0	3	101	161	171	145	215	166	4	1	2,17	-0,28	2,45	RUFY1	chr5:178994566:+	chr5_179567564_+	uc003mka.2:178977570:179036520:+;uc003mkb.2:178987039:179036520:+;uc003mkc.2:178987039:179036520:+
chr12:12351828-12351889:mpeak_15823|chr12_12274354_12419811_LRP6_NM_-|	38	2,41	0,7	-3,3	1,13E-03	3,22E-02	21	52	30	47	55	36	12	11	4	69	47	66	387	76	-0,43	-2,78	2,35	LRP6	chr12:12351826:-	-	uc001rah.4:12274059:12419669:-;uc010shl.1:12274059:12419669:-
chr3:196120416-196120471:mpeak_55185|chr3_196083717_196159345_UBXN7_NM_-|	64	2,40	0,9	-2,7	7,22E-03	9,35E-02	7	9	4	5	2	1	69	104	87	143	214	123	7	2	1,32	-0,88	2,20	UBXN7	-	-	uc003fwm.4:196083555:196159270:-
chr14:55765772-55765943:mpeak_22921|chr14_55738020_55817098_FBXO34_NM_+|	22	2,38	1,0	-2,5	1,25E-02	1,30E-01	30	23	30	32	24	14	15	5	2	38	41	16	369	74	0,23	-2,08	2,31	FBXO34	chr14:55765944:+	chr14_55299219_+	-
chr16:87986300-87986359:mpeak_30640|chr16_87985037_88110195_BANP_NM_+|	120	2,38	0,8	-2,9	3,33E-03	5,81E-02	8	36	6	22	25	25	71	54	31	362	385	411	33	6	-0,47	-2,89	2,42	BANP	chr16:87986354:+	chr16_87952762_+	-
chr19:1393823-1393891:mpeak_36638|chr19_1383882_1395389_NDUFS7_NM_+|	119	2,37	0,9	-2,7	7,52E-03	9,60E-02	12	6	9	3	0	1	255	257	327	173	202	183	3	1	2,76	0,59	2,17	NDUFS7	chr19:1393892:+	chr19_1393890_+	uc002lsh.3:1383733:1394421:+;uc002lse.4:1383925:1395487:+
chr1:230398308-230398358:mpeak_7519|chr1_230193535_230415048_GALNT2_NM_+|	80	2,37	1,0	-2,4	1,76E-02	1,57E-01	24	8	4	4	2	3	75	190	132	212	118	193	9	2	1,97	-0,40	2,37	GALNT2	-	-	uc001htu.2:230398346:230415204:+;uc010pvy.1:230193813:230415204:+;uc010pwa.1:230203027:230415204:+
chr1:87188294-87188361:mpeak_2975|chr1_87170252_87208810_SH3GLB1_NM_+|	39	2,37	1,2	-2,0	4,22E-02	2,64E-01	12	4	5	4	0	0	51	125	79	68	57	62	8	7	2,34	0,45	1,89	SH3GLB1	chr1:87188356:+	chr1_86722673_+	uc001dlx.3:87170582:87208918:+;uc001dly.3:87170582:87208918:+;uc001dlw.3:87170582:87208918:+;uc001dlz.3:87185275:87208918:+
chr12:112696292-112696358:mpeak_19117|chr12_112600327_112819896_HECTD4_NM_-|	40	2,36	1,2	-2,1	3,99E-02	2,55E-01	7	6	3	5	0	1	43	102	30	108	101	71	9	3	1,41	-0,67	2,09	HECTD4	-	-	uc010syk.1:112687931:112711573:-;uc001ttt.3:112687931:112711573:-;uc021reb.1:112600190:112757291:-;uc001tts.3:112687931:112757291:-
chr10:63662507-63662728:mpeak_9265|chr10_63661012_63850620_ARID5B_NM_+|	46	2,36	0,8	-3,0	3,05E-03	5,57E-02	7	5	7	11	5	3	24	36	29	174	160	87	21	5	0,00	-2,23	2,23	ARID5B	chr10:63662725:+	chr10_61902985_+	uc010qil.2:63661468:63810870:+;uc001jlt.2:63661468:63852789:+
chr1:36644553-36644634:mpeak_1725|chr1_36621565_36645848_MAP7D1_NM_+|	111	2,36	1,0	-2,3	2,02E-02	1,71E-01	17	4	4	5	2	0	143	243	195	242	228	246	4	1	1,81	-0,30	2,11	MAP7D1	-	chr1_36178957_+;chr1_36178978_+	uc001cac.3:36641849:36645859:+;uc001cad.3:36643158:36645859:+;uc001bzz.3:36622018:36645859:+;uc001caa.3:36622018:36645859:+;uc001cab.3:36622018:36645859:+
chr1:202883549-202883736:mpeak_6608|chr1_202861787_202897772_KLHL12_NM_-|	134	2,35	0,8	-2,8	5,33E-03	7,85E-02	14	16	16	7	9	3	51	218	227	354	298	392	9	2	1,25	-1,07	2,32	KLHL12	chr1:202883556:-;chr1:202883628:-;chr1:202883659:-	chr1_202914430_-;chr1_202914502_-	uc001gyn.1:202861764:202887415:-;uc001gyo.1:202861660:202894290:-;uc009xah.1:202862368:202894290:-;uc010pqc.1:202861660:202897677:-
chr5:66226731-66226792:mpeak_59776|chr5_65892175_66458974_MAST4_NM_+|	60	2,34	0,6	-4,0	7,19E-05	7,93E-03	43	40	25	19	14	19	55	35	68	103	139	155	68	13	1,03	-1,33	2,36	MAST4	chr5:66226789:+	chr5_66930961_+	uc003jus.3:66124671:66410076:+;uc003jut.2:66124671:66462879:+;uc010iwz.3:65892483:66282314:+;uc003jur.4:65892483:66282314:+;uc021xzk.1:65892483:66462879:+
chr2:97527939-97528074:mpeak_42514|chr2_97527192_97535735_SEMA4C_NM_-|	84	2,34	1,0	-2,4	1,54E-02	1,46E-01	20	5	4	4	15	7	57	31	75	177	227	387	17	3	0,13	-2,27	2,40	SEMA4C	chr2:97528019:-	chr2_96862283_-	uc002sxg.4:97526362:97532436:-;uc002sxh.4:97526362:97533623:-
chr15:52531926-52532002:mpeak_25820|chr15_52486251_52587995_MYO5C_NM_-|	32	2,32	1,2	-2,0	4,90E-02	2,86E-01	44	6	21	4	3	2	58	118	18	51	26	34	37	8	3,05	0,80	2,26	MYO5C	-	-	uc010bff.3:52486098:52587833:-
chr1:220953351-220953399:mpeak_7186|chr1_220921675_220957260_MARC2_NM_+|	13	2,32	1,1	-2,1	3,47E-02	2,35E-01	13	8	6	0	2	3	15	15	35	23	14	27	40	10	2,58	0,01	2,56	MARC2	-	-	uc001hmq.3:220921873:220955243:+;uc001hmr.3:220921873:220955243:+;uc009xdx.3:220921873:220957284:+
chr11:61197782-61197833:mpeak_12956|chr11_61197596_61213412_SDHAF2_NM_+|	133	2,30	1,1	-2,1	3,70E-02	2,44E-01	5	0	12	1	3	0	298	283	218	200	317	253	3	1	2,12	0,05	2,07	SDHAF2	chr11:61197834:+	chr11_61430361_+	uc001nrt.3:61197618:61213543:+
chr5:140905615-140905754:mpeak_61873|chr5_140896575_140998622_DIAPH1_NM_-|	372	2,29	0,7	-3,2	1,49E-03	3,60E-02	14	10	35	8	3	7	552	576	730	815	700	1009	3	1	1,76	-0,44	2,20	DIAPH1	chr5:140905666:-	-	uc011dbd.2:140896536:140905983:-;uc003llb.4:140896417:140998481:-;uc003llc.4:140896417:140998481:-;uc021yep.1:140896417:140998481:-;uc021yeq.1:140896417:140998481:-
chr11:47765460-47765544:mpeak_12729|chr11_47739064_47788993_FNBP4_NM_-|	14	2,29	1,0	-2,2	2,80E-02	2,06E-01	17	5	10	9	23	18	0	4	6	27	30	21	228	64	-0,63	-3,04	2,41	FNBP4	chr11:47765465:-;chr11:47765501:-	chr11_47743914_-	uc001ngj.3:47738973:47786855:-;uc009ylv.3:47738973:47788840:-
chr10:13652442-13652502:mpeak_8333|chr10_13628938_13672259_PRPF18_NM_+|	21	2,28	1,1	-2,0	4,71E-02	2,78E-01	9	24	9	1	4	2	15	73	20	27	49	21	39	8	2,49	0,16	2,33	PRPF18	chr10:13652496:+	chr10_13610493_+	uc001imp.3:13629086:13672340:+
chr11:82869820-82869935:mpeak_14274|chr11_82868136_82895720_PCF11_NM_+|	30	2,27	0,7	-3,3	1,12E-03	3,19E-02	33	34	19	28	20	24	15	13	12	54	79	33	213	44	0,23	-2,05	2,28	PCF11	chr11:82869878:+;chr11:82869921:+	chr11_83158836_+;chr11_83158893_+	uc010rsu.1:82868481:82881037:+;uc001ozx.4:82868481:82895936:+
chr9:20673856-20673917:mpeak_74222|chr9_20658307_20995554_FOCAD_NM_+|	127	2,26	1,0	-2,2	2,45E-02	1,91E-01	8	3	9	1	1	1	202	369	243	257	273	152	2	1	2,45	0,25	2,20	FOCAD	chr9:20673897:+	chr9_20673907_+	-
chr17:46928439-46928542:mpeak_33405|chr17_46908349_46940199_CALCOCO2_NM_+|	89	2,24	0,9	-2,5	1,41E-02	1,41E-01	51	6	28	7	3	14	96	169	143	209	191	156	21	4	1,82	-0,45	2,27	CALCOCO2	-	chr17_48851143_+	uc010wlq.3:46925461:46940367:+;uc010wlp.3:46919069:46940367:+;uc010wlr.3:46919069:46940367:+;uc002iof.4:46919069:46940367:+;uc010wls.3:46919069:46940367:+
chr20:46257483-46257582:mpeak_47276|chr20_46130600_46282149_NCOA3_NM_+|	1645	2,21	0,6	-3,8	1,24E-04	1,10E-02	23	36	14	12	13	6	2185	2159	2330	3653	4939	4365	1	0	1,25	-0,96	2,21	NCOA3	chr20:46257534:+	chr20_47628801_+	uc002xtk.3:46250991:46282161:+;uc002xtl.3:46250991:46282161:+;uc002xtn.3:46250991:46282161:+;uc010ght.2:46250991:46282161:+;uc002xtm.3:46250991:46282161:+;uc010zyc.2:46256366:46282161:+
chr11:2975110-2975160:mpeak_11667|chr11_2966876_3013607_NAP1L4_NM_-|	194	2,20	1,0	-2,2	2,88E-02	2,09E-01	0	5	9	3	1	1	346	340	441	314	437	435	2	0	1,77	-0,07	1,85	NAP1L4	chr11:2975109:-	chr11_2953880_-	uc001lxc.3:2970488:3000450:-;uc010qxm.2:2966837:3000450:-;uc010qxn.2:2966837:3000450:-
chr8:11661290-11661350:mpeak_70839|chr8_11653081_11695896_FDFT1_NM_+|	366	2,19	1,0	-2,3	2,21E-02	1,79E-01	3	31	9	7	4	1	605	727	701	727	666	916	2	1	1,90	-0,18	2,09	FDFT1	chr8:11661344:+	chr8_11803834_+	uc003wui.3:11660341:11696118:+;uc011kxf.2:11660341:11696118:+;uc011kxg.2:11660355:11696118:+
chr21:45462399-45462525:mpeak_48837|chr21_45432205_45523173_TRAPPC10_NM_+|	70	2,19	0,7	-3,2	1,21E-03	3,33E-02	13	15	14	1	11	4	78	114	82	188	142	181	15	3	1,37	-0,90	2,27	TRAPPC10	chr21:45462453:+	chr21_44042571_+	uc002zdz.3:45432374:45479386:+;uc002zea.3:45432374:45523412:+
chr15:99491988-99492048:mpeak_27347|chr15_99191767_99500289_IGF1R_NM_+|	325	2,19	0,7	-3,1	1,97E-03	4,24E-02	7	4	11	0	3	5	400	510	438	854	731	939	2	0	1,42	-0,91	2,32	IGF1R	chr15:99492044:+	chr15_98948815_+	uc002bul.3:99192810:99500671:+;uc010bon.3:99192810:99500671:+
chr15:93482800-93482952:mpeak_27287|chr15_93443550_93567601_CHD2_NM_+|	25	2,19	0,8	-2,7	7,47E-03	9,57E-02	13	23	12	15	19	15	3	23	10	49	55	66	132	29	-0,04	-2,22	2,18	CHD2	-	chr15_92939599_+;chr15_92939623_+	uc002bsm.2:93444467:93486365:+;uc002bsn.3:93444467:93492310:+;uc002bso.1:93444467:93563555:+;uc002bsp.3:93444467:93567935:+;uc010urb.2:93448137:93492310:+
chr11:35244816-35244876:mpeak_12456|chr11_35160416_35250675_CD44_NM_+|	175	2,19	0,9	-2,4	1,66E-02	1,52E-01	14	5	20	0	0	5	362	462	421	261	213	338	3	2	3,06	0,62	2,44	CD44	chr11:35244866:+	chr11_35223329_+	uc001mvu.3:35160850:35250880:+;uc001mvv.3:35160850:35250880:+;uc001mvw.3:35160850:35250880:+;uc001mwc.4:35160850:35250880:+;uc001mvx.3:35160850:35250880:+;uc010rer.2:35160850:35250880:+;uc001mvy.3:35160850:35250834:+
chr9:134086696-134086758:mpeak_76722|chr9_134000947_134108840_NUP214_NM_+|	187	2,18	1,0	-2,1	3,54E-02	2,38E-01	20	19	2	1	14	3	182	315	181	543	577	392	6	1	1,10	-1,16	2,26	NUP214	chr9:134086756:+	chr9_131211369_+	uc004cag.3:134001091:134108874:+;uc004cah.3:134001091:134108874:+;uc004cai.3:134020085:134108874:+;uc011mcg.2:134065815:134108874:+
chr13:42877949-42878005:mpeak_20852|chr13_42846288_42893223_AKAP11_NM_+|	33	2,18	1,0	-2,2	2,85E-02	2,08E-01	66	15	21	12	19	13	16	54	14	68	63	32	122	27	1,24	-0,95	2,18	AKAP11	-	-	uc001uys.2:42860484:42893364:+
chr3:172468563-172468652:mpeak_54587|chr3_172468474_172537937_ECT2_NM_+|	68	2,18	1,0	-2,1	3,70E-02	2,44E-01	17	5	7	1	3	1	97	253	81	96	135	121	7	2	2,46	0,29	2,17	ECT2	-	-	-
chr3:37317629-37317987:mpeak_51407|chr3_37284681_37407570_GOLGA4_NM_+|	270	2,17	0,6	-3,5	5,03E-04	2,09E-02	717	538	659	349	500	347	10	20	6	22	45	30	5261	1238	0,68	-1,41	2,09	GOLGA4	chr3:37317656:+	chr3_37276391_+	uc003cgu.2:37285041:37330782:+;uc010hgr.2:37285041:37369314:+;uc003cgv.3:37285041:37402763:+;uc003cgw.3:37285041:37407594:+;uc010hgs.3:37285041:37407594:+
chrX:76909576-76909694:mpeak_78444|chrX_76764107_77041755_ATRX_NM_-|	53	2,16	0,8	-2,6	8,46E-03	1,03E-01	3	18	8	3	5	5	42	84	69	104	160	133	15	3	1,22	-1,02	2,24	ATRX	-	chrX_77654124_-	uc004ecp.4:76763828:77041487:-;uc004ecq.4:76763828:77041487:-;uc004eco.4:76763828:76940447:-
chr6:47576910-47577052:mpeak_64727|chr6_47445524_47591921_CD2AP_NM_+|	18	2,16	0,9	-2,5	1,42E-02	1,41E-01	14	10	20	5	1	5	23	35	19	24	38	25	57	13	1,93	-0,16	2,09	CD2AP	-	chr6_47609302_+	uc003oyw.3:47445980:47591963:+
chr3:146239226-146239282:mpeak_53987|chr3_146233888_146262628_PLSCR1_NM_-|	25	2,15	1,1	-2,0	4,41E-02	2,72E-01	3	5	9	0	8	7	7	34	15	80	67	68	32	10	0,26	-1,94	2,19	PLSCR1	chr3:146239230:-	chr3_146521446_-	uc003evx.4:146233831:146254339:-;uc011bnn.2:146233831:146251325:-
chrX:107782970-107783030:mpeak_78751|chrX_107683073_107939526_COL4A5_NM_+|	21	2,14	0,9	-2,4	1,63E-02	1,51E-01	33	13	35	23	14	9	8	20	7	20	36	29	225	54	0,79	-1,25	2,05	COL4A5	-	-	uc004enz.2:107683355:107939608:+;uc022ccg.2:107683355:107939608:+
chr6:160170395-160170456:mpeak_66755|chr6_160148029_160176059_WTAP_NM_+|	99	2,14	0,7	-2,9	3,30E-03	5,79E-02	140	108	92	66	147	100	20	67	20	116	136	176	319	73	0,12	-2,01	2,12	WTAP	chr6:160170451:+	chr6_159749367_+;chr6_159749386_+;chr6_159749423_+;chr6_159749463_+	uc003qsl.4:160157297:160176643:+;uc031sqv.1:160157297:160176643:+
chr7:155493455-155493607:mpeak_70565|chr7_155437202_155567686_RBM33_NM_+|	40	2,13	0,9	-2,5	1,37E-02	1,38E-01	13	31	7	38	21	34	8	23	7	84	112	103	135	31	-0,85	-2,97	2,13	RBM33	-	chr7_155700819_+;chr7_155700830_+;chr7_155700864_+	uc011kvv.1:155493472:155559385:+;uc003wme.3:155437570:155493706:+;uc010lqk.1:155437570:155567735:+
chr17:80530493-80530571:mpeak_35279|chr17_80477593_80559178_FOXK2_NM_+|	118	2,13	0,5	-4,5	6,73E-06	1,43E-03	21	24	26	18	21	22	89	82	99	293	304	419	26	6	0,22	-1,92	2,14	FOXK2	chr17:80530561:+	-	uc002kfm.1:80477764:80553716:+;uc002kfn.3:80477764:80559375:+;uc010diu.3:80477764:80559280:+
chr20:47760754-47760892:mpeak_47417|chr20_47731430_47804904_STAU1_NM_-|	592	2,12	1,0	-2,2	3,01E-02	2,16E-01	10	0	10	0	0	3	1099	1380	1350	916	1159	1172	1	0	2,62	0,24	2,38	STAU1	-	chr20_49144306_-	uc002xua.3:47731414:47770570:-;uc002xub.3:47731414:47770570:-;uc002xud.3:47731414:47782738:-;uc002xuc.3:47731414:47770570:-;uc002xue.3:47731414:47770570:-;uc002xuf.3:47731414:47770570:-;uc002xug.3:47731414:47782738:-
chr16:69404233-69404337:mpeak_29890|chr16_69390959_69419891_TERF2_NM_-|	110	2,12	0,6	-3,4	5,66E-04	2,16E-02	14	8	19	9	10	11	77	133	89	261	320	373	13	3	0,41	-1,67	2,08	TERF2	chr16:69404237:-;chr16:69404289:-	chr16_69370338_-;chr16_69370376_-	uc002exd.4:69390800:69419748:-
chr17:38289291-38289345:mpeak_32818|chr17_38278789_38290531_MSL1_NM_+|	116	2,11	0,9	-2,4	1,48E-02	1,44E-01	14	5	3	0	4	9	125	127	91	320	393	301	6	2	0,76	-1,57	2,32	MSL1	-	chr17_40133104_+	uc002hua.4:38282456:38290622:+;uc002hub.3:38279468:38290622:+;uc002hud.3:38287797:38290622:+
chr14:75912182-75912240:mpeak_23794|chr14_75894508_75935992_JDP2_NM_+|	82	2,10	0,9	-2,4	1,53E-02	1,46E-01	2	9	5	5	5	1	112	55	74	241	308	169	7	2	0,45	-1,57	2,03	JDP2	chr14:75912238:+	chr14_75445532_+	uc010asj.3:75904623:75936178:+;uc010tvb.2:75904623:75936178:+;uc010tvc.2:75904623:75936178:+;uc001xrq.3:75899029:75936178:+
chr6:151907573-151907703:mpeak_66514|chr6_151815174_151939081_CCDC170_NM_+|	36	2,10	1,0	-2,0	4,24E-02	2,65E-01	3	14	9	0	4	0	83	83	64	41	72	55	11	8	2,62	0,46	2,16	CCDC170	-	-	uc003qol.3:151815263:151939282:+
chr7:917901-917957:mpeak_67028|chr7_916190_934970_GET4_NM_+|	157	2,08	0,9	-2,2	2,49E-02	1,93E-01	10	5	4	0	6	1	233	167	334	326	311	483	3	1	1,59	-0,61	2,20	GET4	chr7:917956:+	chr7_878318_+	uc003sjl.1:916282:935059:+
chr12:12633150-12633209:mpeak_15840|chr12_12630949_12715448_DUSP16_NM_-|	70	2,08	1,0	-2,0	4,30E-02	2,68E-01	23	15	3	7	9	1	101	118	61	185	215	97	15	3	1,25	-0,82	2,07	DUSP16	-	-	uc001ran.2:12629766:12672882:-;uc001rao.2:12629766:12674032:-
chr4:160250998-160251079:mpeak_58282|chr4_160188997_160279265_RAPGEF2_NM_+|	23	2,07	0,9	-2,3	2,34E-02	1,85E-01	12	8	14	15	43	25	3	8	4	49	29	68	230	57	-1,30	-3,32	2,02	RAPGEF2	-	chr4_159329917_+	uc003iqg.4:160189307:160279291:+
chr12:123247400-123247520:mpeak_19700|chr12_123237367_123253580_DENR_NM_+mpeak_19700|chr12_123237367_123253580_DENR_NM_+||	211	2,07	0,9	-2,3	2,16E-02	1,77E-01	12	8	7	3	3	0	503	562	378	309	489	256	2	1	2,33	0,45	1,88	DENR	chr12:123247476:+;chr12:123247517:+	chr12_122762892_+;chr12_122762929_+;chr12_122762969_+	uc001uda.3:123238248:123253625:+
chr13:42640807-42640863:mpeak_20831|chr13_42614171_42803234_DGKH_NM_+|	30	2,06	1,0	-2,1	3,99E-02	2,55E-01	10	3	11	5	2	7	19	53	24	59	112	52	25	6	0,79	-1,23	2,02	DGKH	chr13:42640859:+	chr13_42066722_+	uc010tfh.2:42622909:42803287:+;uc001uyl.2:42622909:42803324:+;uc001uym.2:42622909:42803287:+
chr17:48777926-48778057:mpeak_33532|chr17_48773504_48785270_ANKRD40_NM_-|	41	2,06	0,8	-2,5	1,23E-02	1,29E-01	38	10	25	22	5	21	26	38	37	74	101	93	73	18	0,62	-1,42	2,04	ANKRD40	-	chr17_50700597_-	uc002iso.3:48773357:48785015:-
chr19:11170427-11170569:mpeak_37325|chr19_11071597_11172459_SMARCA4_NM_+|	684	2,05	0,7	-2,7	6,01E-03	8,44E-02	22	5	19	4	1	5	1125	1634	1481	1446	1124	1347	1	0	2,16	0,11	2,05	SMARCA4	-	chr19_11059803_+;chr19_11059876_+	uc010dxo.3:11094827:11172492:+;uc010dxp.3:11094827:11172492:+;uc002mqf.4:11094827:11172492:+;uc010dxq.3:11094827:11172492:+;uc010dxr.3:11094827:11172492:+;uc002mqj.4:11094827:11172492:+;uc010dxs.3:11094827:11172492:+;uc002mqh.4:11132415:11172492:+
chr2:128255686-128255820:mpeak_43211|chr2_128238751_128284087_IWS1_NM_-|	28	2,05	1,0	-2,1	3,37E-02	2,31E-01	3	11	14	12	19	5	16	23	7	57	114	60	62	16	-0,34	-2,32	1,98	IWS1	-	chr2_127498192_-	uc002ton.2:128238619:128283784:-
chr16:9205886-9205965:mpeak_28094|chr16_9185536_9210524_C16orf72_NM_+|	122	2,05	0,6	-3,2	1,44E-03	3,51E-02	49	121	100	93	126	62	44	84	45	220	304	217	156	38	-0,06	-2,10	2,04	C16orf72	chr16:9205889:+;chr16:9205915:+;chr16:9205958:+;chr16:9206000:+	chr16_9112031_+;chr16_9112122_+	uc002czm.3:9185901:9210769:+
chr12:132417855-132417910:mpeak_19972|chr12_132413744_132428083_PUS1_NM_+|	92	2,04	1,0	-2,1	3,67E-02	2,44E-01	2	8	22	7	15	3	73	62	120	234	239	314	12	3	0,35	-1,63	1,98	PUS1	chr12:132417908:+	chr12_131933380_+	uc001uji.3:132416575:132428131:+;uc001ujg.3:132414461:132428131:+;uc001ujh.3:132414461:132428131:+;uc001ujf.3:132414267:132428131:+
chr12:80082128-80082183:mpeak_18229|chr12_79986473_80084790_PAWR_NM_-|	70	2,04	0,8	-2,7	7,23E-03	9,35E-02	17	9	16	7	11	8	37	122	61	170	227	155	19	5	0,71	-1,33	2,04	PAWR	chr12:80082131:-	chr12_79688353_-	uc001syx.3:79986386:80084024:-
chr1:214655651-214655716:mpeak_7046|chr1_214531393_214725024_PTPN14_NM_-|	62	2,04	0,5	-4,0	5,21E-05	6,51E-03	80	93	73	35	55	27	44	38	47	74	92	87	191	46	1,07	-0,97	2,05	PTPN14	-	-	-
chr1:108138062-108138216:mpeak_3399|chr1_108115994_108507545_VAV3_NM_-|	68	2,03	0,8	-2,5	1,23E-02	1,29E-01	6	5	8	7	13	3	45	60	33	146	260	231	14	3	-0,24	-2,19	1,96	VAV3	-	chr1_107595544_-	uc010ouu.1:108115952:108185366:-;uc001dvj.1:108115952:108231053:-;uc010ouv.1:108115952:108185366:-;uc001dvk.1:108115952:108507491:-;uc010ouw.1:108115952:108507491:-
chr12:863438-863496:mpeak_15369|chr12_862088_1017640_WNK1_NM_+|	306	2,02	0,8	-2,6	1,05E-02	1,18E-01	10	9	9	4	3	0	619	835	604	493	615	471	1	1	2,12	0,38	1,74	WNK1	-	chr12_754321_+	uc021qss.1:862731:1017958:+;uc001qio.4:862731:1017958:+;uc021qst.1:862731:1017958:+;uc001qip.4:862731:1017958:+;uc031qfk.1:862731:1017958:+;uc001qin.3:862731:936457:+
chr8:30572353-30572413:mpeak_71317|chr8_30537186_30585486_GSR_NM_-|	460	2,02	0,8	-2,5	1,08E-02	1,20E-01	14	3	9	1	4	1	804	1059	946	970	808	902	1	0	2,05	0,07	1,98	GSR	chr8:30572359:-	-	uc003xih.2:30537036:30585352:-;uc022ato.1:30537036:30585352:-;uc022atp.1:30537036:30585352:-;uc022atq.1:30537036:30585352:-
chr10:12136209-12136334:mpeak_8254|chr10_12110915_12162785_DHTKD1_NM_+|	1141	2,02	1,0	-2,0	4,58E-02	2,75E-01	12	5	2	1	0	2	2657	1804	3156	1959	1661	2438	0	0	2,49	0,33	2,16	DHTKD1	chr10:12136336:+	chr10_12094336_+	uc001ild.5:12111032:12162887:+
chr1:16893671-16893731:mpeak_719|chr1_16890681_16940100_NBPF1_NM_-|	131	2,01	0,6	-3,1	2,00E-03	4,25E-02	30	14	17	38	36	21	47	99	50	504	383	327	31	8	-0,64	-2,63	1,99	NBPF1	chr1:16893674:-	-	uc009vot.1:16892904:16912158:-;uc001ayz.1:16892904:16912158:-;uc001ayw.4:16890437:16918516:-
chr5:179400860-179400917:mpeak_62869|chr5_179382669_179499118_RNF130_NM_-|	28	2,01	0,9	-2,3	1,91E-02	1,65E-01	9	11	14	5	5	3	20	63	31	70	38	66	31	8	1,34	-0,61	1,96	RNF130	chr5:179400866:-	chr5_179973867_-	uc003mll.1:179382653:179498702:-;uc003mlm.1:179382664:179498702:-
chr21:40186843-40186911:mpeak_48569|chr21_40177230_40194597_ETS2_NM_+|	90	2,00	0,8	-2,6	1,06E-02	1,19E-01	34	5	30	54	28	54	24	45	30	208	254	312	69	18	-0,99	-2,96	1,97	ETS2	chr21:40186905:+	chr21_38814977_+	uc002yxf.3:40177270:40194813:+;uc002yxg.4:40181958:40194813:+
chr8:101164048-101164128:mpeak_72746|chr8_101162838_101165521_POLR2K_NM_+|	88	1,99	0,9	-2,1	3,35E-02	2,30E-01	52	57	13	9	6	7	75	328	127	135	103	139	23	6	2,47	0,49	1,98	POLR2K	-	-	uc003yjf.3:101163583:101165544:+
chr20:47539090-47539142:mpeak_47379|chr20_47538274_47649559_ARFGEF2_NM_+|	62	1,99	0,7	-2,7	6,14E-03	8,54E-02	9	24	17	0	5	4	128	140	108	103	85	118	13	4	2,45	0,30	2,16	ARFGEF2	-	chr20_48922604_+	uc002xtx.4:47538426:47649736:+
chr2:38978366-38978431:mpeak_41066|chr2_38972329_38978636_SRSF7_NM_-|	559	1,99	0,9	-2,3	2,11E-02	1,74E-01	6	0	12	8	3	1	582	735	648	1430	1890	1393	1	0	0,44	-1,26	1,70	SRSF7	chr2:38978371:-	-	uc002rqz.3:38972274:38978398:-;uc010ynp.2:38972274:38978398:-
chr16:3336826-3336886:mpeak_27846|chr16_3333486_3339392_ZNF263_NM_+|	36	1,99	0,8	-2,7	8,00E-03	1,01E-01	23	13	22	19	24	23	7	16	32	70	90	94	104	26	-0,17	-2,19	2,02	ZNF263	chr16:3336885:+	chr16_3286869_+	uc002cuq.3:3333818:3340558:+
chrX:100879151-100879213:mpeak_78640|chrX_100878119_100879823_ARMCX3_NM_+|	56	1,99	0,9	-2,2	3,13E-02	2,21E-01	9	0	9	4	1	3	73	106	64	122	168	118	11	2	1,12	-0,75	1,87	ARMCX3	-	-	-
chr9:130375946-130376032:mpeak_76417|chr9_130374485_130453053_STXBP1_NM_+|	21	1,98	1,0	-2,0	4,04E-02	2,56E-01	10	8	6	0	7	1	22	38	35	42	41	38	26	9	1,72	-0,35	2,08	STXBP1	chr9:130376030:+	chr9_127613750_+	uc004brk.2:130374682:130446756:+;uc004brl.2:130374682:130453136:+
chr10:71989036-71989118:mpeak_9521|chr10_71962942_71993190_PPA1_NM_-|	299	1,98	0,7	-2,6	8,06E-03	1,01E-01	8	9	9	3	3	1	703	683	599	522	494	559	1	0	2,16	0,33	1,82	PPA1	chr10:71989035:-	chr10_70229264_-	uc001jqv.1:71962910:71993083:-
chr9:128002948-128002998:mpeak_76331|chr9_127999433_128003666_HSPA5_NM_-|	10166	1,97	0,9	-2,1	3,22E-02	2,26E-01	72	10	18	14	5	4	19289	21058	25893	13083	21112	21434	0	0	2,15	0,25	1,90	HSPA5	-	chr9_125240667_-	uc004bpn.3:127998870:128003405:-
chr5:145609289-145609482:mpeak_61982|chr5_145583162_145665509_RBM27_NM_+|	34	1,97	0,7	-2,7	7,11E-03	9,30E-02	14	20	10	14	6	11	27	40	23	96	91	52	49	13	0,55	-1,41	1,96	RBM27	-	chr5_146229896_+	uc003lny.2:145583328:145649147:+;uc003lnz.4:145583328:145665593:+
chr19:2431603-2431667:mpeak_36741|chr19_2430950_2456966_LMNB2_NM_-|	431	1,97	0,8	-2,4	1,48E-02	1,44E-01	24	11	30	19	5	3	466	682	907	1000	755	1271	3	1	1,27	-0,56	1,83	LMNB2	-	chr19_2431614_-	uc002lvy.4:2430908:2456931:-
chr3:195966565-195966622:mpeak_55165|chr3_195965765_196014584_PCYT1A_NM_-|	75	1,96	0,7	-3,0	2,64E-03	5,12E-02	177	91	161	101	136	135	12	9	4	22	25	32	1729	470	0,20	-1,68	1,88	PCYT1A	-	-	uc003fwg.3:195965558:195997402:-;uc003fwh.3:195965558:195997402:-
chr8:145134109-145134250:mpeak_73775|chr8_145133521_145135144_EXOSC4_NM_+|	113	1,95	0,5	-3,7	1,85E-04	1,32E-02	44	40	27	16	37	19	105	107	114	253	287	309	34	9	0,61	-1,38	1,99	EXOSC4	chr8:145134162:+;chr8:145134256:+	chr8_144079258_+;chr8_144079374_+	uc003zau.3:145133631:145135504:+
chr11:67933182-67933239:mpeak_13711|chr11_67926638_67981239_SUV420H1_NM_-|	77	1,95	0,8	-2,4	1,76E-02	1,57E-01	56	45	50	22	56	26	54	75	55	57	292	138	82	21	0,55	-1,40	1,95	SUV420H1	chr11:67933184:-;chr11:67933227:-	chr11_68165718_-;chr11_68165754_-	uc001onm.1:67925154:67957543:-;uc001onn.1:67925154:67942511:-;uc009ysf.2:67925154:67939109:-
chr8:141582243-141582345:mpeak_73557|chr8_141542251_141645646_AGO2_NM_-|	156	1,94	0,9	-2,2	2,79E-02	2,06E-01	2	9	14	0	6	1	304	272	294	241	401	332	3	1	1,82	-0,16	1,98	AGO2	chr8:141582241:-;chr8:141582294:-	chr8_140572144_-;chr8_140572193_-	uc003yvn.3:141542142:141645605:-;uc010meo.3:141542142:141645605:-;uc010men.3:141542142:141583015:-
chr20:30904021-30904130:mpeak_46646|chr20_30865453_30919025_KIF3B_NM_+|	53	1,94	1,0	-2,0	4,71E-02	2,78E-01	15	9	4	1	3	0	147	121	104	69	101	63	8	3	2,58	0,67	1,91	KIF3B	chr20:30904122:+	-	uc002wxq.3:30897580:30919122:+;uc010ztw.2:30897580:30919122:+
chr19:54662013-54662132:mpeak_39693|chr19_54659678_54663481_LENG1_NM_-|	35	1,94	0,9	-2,2	2,77E-02	2,06E-01	8	18	18	16	29	25	16	23	6	41	118	108	98	26	-0,67	-2,57	1,90	LENG1	chr19:54662033:-	chr19_54158285_-;chr19_54158336_-	uc002qdm.3:54659458:54663433:-
chr1:114946100-114946226:mpeak_3881|chr1_114940482_115053781_TRIM33_NM_-|	223	1,93	1,0	-2,0	4,49E-02	2,74E-01	29	5	22	16	5	1	344	479	253	405	631	487	5,18	1	1,30	-0,50	1,80	TRIM33	-	-	uc010owr.2:114940269:114970495:-;uc010ows.2:114940269:114970495:-;uc001eew.3:114940269:115053697:-;uc001eex.3:114940269:115053697:-
chr12:54646212-54646264:mpeak_17226|chr12_54635689_54673915_CBX5_NM_-|	920	1,93	1,0	-2,0	4,86E-02	2,84E-01	0	8	12	0	2	2	2592	1766	1859	1422	1880	1501	0	0	2,42	0,37	2,05	CBX5	chr12:54646210:-	chr12_54252413_-	uc001sfh.4:54635538:54651434:-;uc001sfj.4:54635538:54651434:-;uc001sfk.4:54635538:54651434:-
chr1:111738916-111739003:mpeak_3673|chr1_111730303_111747160_DENND2D_NM_-|	62	1,92	0,8	-2,4	1,63E-02	1,50E-01	12	8	28	4	8	6	131	54	92	145	139	122	17	5	1,35	-0,55	1,90	DENND2D	-	chr1_111196306_-	uc001eak.2:111730226:111743081:-;uc001eal.2:111730226:111746975:-
chr11:48168452-48168524:mpeak_12754|chr11_48002109_48188755_PTPRJ_NM_+|	61	1,91	0,8	-2,5	1,29E-02	1,33E-01	30	8	22	7	7	7	68	143	79	154	107	101	21	6	1,57	-0,32	1,89	PTPRJ	chr11:48168516:+	-	uc001ngp.4:48002464:48188914:+
chr10:114912143-114912204:mpeak_10913|chr10_114710008_114925313_TCF7L2_NM_+|	50	1,89	0,7	-2,6	9,43E-03	1,11E-01	17	11	16	15	23	10	29	25	49	155	81	173	43	12	-0,10	-1,99	1,89	TCF7L2	-	chr10_113152438_+	uc021pyg.1:114905848:114925731:+;uc010qrv.2:114886637:114921344:+;uc010qrw.2:114910769:114921344:+;uc010qrx.2:114889623:114921344:+;uc001lah.3:114710515:114920420:+;uc010qro.2:114710515:114925393:+;uc001lae.4:114710515:114925731:+;uc010qrm.2:114710515:114925393:+;uc010qrn.2:114710515:114925393:+;uc021pyh.1:114710515:114925393:+;uc021pyi.1:114710515:114925731:+;uc021pyj.1:114710515:114925393:+;uc0…
chr6:152201779-152201914:mpeak_66552|chr6_152011630_152419866_ESR1_NM_+|	444	1,89	0,7	-2,6	1,03E-02	1,17E-01	79	15	50	49	19	26	640	410	466	1253	1161	1164	10	3	0,63	-1,24	1,86	ESR1	-	-	uc003qom.4:152129047:152420101:+;uc010kin.3:152129047:152420101:+;uc010kio.3:152129047:152420101:+;uc010kip.3:152129047:152420101:+;uc003qon.4:152129047:152420101:+;uc010kir.3:152129047:152420101:+;uc003qoo.4:152129047:152420101:+;uc010kiq.3:152201877:152420101:+;uc011eev.2:152163798:152420101:+;uc011eew.2:152163784:152419869:+;uc010kis.3:152163798:152417823:+;uc021zha.1:152163868:152420101:+;uc0…
chr20:46335253-46335310:mpeak_47318|chr20_46287136_46415360_SULF2_NM_-|	615	1,88	0,8	-2,5	1,34E-02	1,36E-01	7	26	19	3	8	2	1164	1055	1673	1135	899	1386	1	0	2,08	0,19	1,89	SULF2	chr20:46335257:-	chr20_47706514_-	uc002xto.3:46287105:46386107:-;uc010ghv.1:46318865:46386107:-;uc002xtr.3:46287105:46386107:-;uc002xtq.3:46287105:46386107:-
chr6:128840069-128840128:mpeak_65956|chr6_128291425_128841819_PTPRK_NM_-|	226	1,87	0,9	-2,0	4,14E-02	2,61E-01	5	11	8	3	4	0	270	684	396	412	522	393	2	1	1,79	0,03	1,76	PTPRK	chr6:128840071:-	chr6_128518927_-	uc010kfc.3:128291371:128841503:-;uc003qbj.3:128291371:128841503:-;uc011ebu.2:128291371:128841503:-;uc003qbk.3:128291371:128841503:-;uc011ebv.1:128321416:128841503:-
chr17:73260520-73260578:mpeak_34719|chr17_73257748_73261782_MRPS7_NM_+|	477	1,87	0,8	-2,5	1,39E-02	1,40E-01	20	8	31	4	9	1	909	1096	1001	828	903	912	2	1	1,99	0,19	1,80	MRPS7	chr17:73260574:+	chr17_75264492_+	uc002jnm.4:73257981:73262004:+
chr7:150820668-150820730:mpeak_70452|chr7_150782917_150840823_AGAP3_NM_+|	204	1,86	0,5	-3,8	1,22E-04	1,10E-02	205	179	150	82	131	77	239	159	149	285	377	418	98	27	0,88	-0,98	1,86	AGAP3	chr7:150820725:+	chr7_151123591_+;chr7_151123638_+	uc003wje.1:150814842:150841030:+;uc003wjg.1:150783828:150841030:+
chr4:25783958-25784050:mpeak_56026|chr4_25750186_25865217_SEL1L3_NM_-|	173	1,86	0,8	-2,4	1,74E-02	1,56E-01	42	21	45	12	4	3	214	522	474	182	228	324	9	3	2,45	0,72	1,73	SEL1L3	-	-	uc003grv.3:25759141:25804081:-;uc003gru.4:25750046:25864458:-
chr15:65849065-65849241:mpeak_26298|chr15_65822826_65868640_HACD3_NM_+|	255	1,86	0,9	-2,1	3,41E-02	2,32E-01	10	1	15	3	0	4	572	465	570	519	399	502	2	1	2,00	0,18	1,82	HACD3	chr15:65849242:+	chr15_65556823_+	uc002apc.3:65822969:65868717:+;uc010uiw.2:65822969:65868717:+
chr15:41745089-41745148:mpeak_25214|chr15_41709301_41772778_RTF1_NM_+|	100	1,86	0,7	-2,6	9,81E-03	1,13E-01	36	52	27	23	46	15	51	83	136	226	250	258	42	11	0,44	-1,44	1,88	RTF1	-	chr15_41452935_+	uc001zny.3:41709313:41772885:+
chr1:108145010-108145098:mpeak_3401|chr1_108115994_108507545_VAV3_NM_-|	103	1,85	0,6	-2,9	3,53E-03	5,97E-02	85	38	79	81	61	117	45	60	33	146	260	231	145	41	-0,36	-2,19	1,83	VAV3	-	-	uc010ouu.1:108115952:108185366:-;uc001dvj.1:108115952:108231053:-;uc010ouv.1:108115952:108185366:-;uc001dvk.1:108115952:108507491:-;uc010ouw.1:108115952:108507491:-
chr7:75070413-75070468:mpeak_68662|chr7_75048176_75115565_POM121C_NM_-|	191	1,85	0,5	-3,5	4,52E-04	2,04E-02	24	25	21	5	16	18	223	190	280	535	451	508	10	3	0,83	-1,11	1,94	POM121C	chr7:75070415:-	chr7_75441138_-;chr7_75441195_-	uc003udk.4:75048078:75070774:-;uc010lde.1:75066792:75071993:-
chr5:149764143-149764208:mpeak_62077|chr5_149737201_149779372_TCOF1_NM_+|	77	1,85	0,7	-2,8	4,51E-03	7,02E-02	21	15	30	4	9	16	108	112	88	154	142	222	21	6	1,16	-0,75	1,90	TCOF1	chr5:149764201:+	chr5_150384636_+	uc003lry.3:149737309:149778611:+;uc003lrz.3:149737309:149778611:+;uc011dch.2:149737309:149778611:+;uc003lrx.3:149737309:149778611:+;uc003lsa.3:149737309:149778611:+;uc011dci.1:149754946:149767650:+
chr4:2008633-2008688:mpeak_55527|chr4_1985230_2010962_NELFA_NM_-|	185	1,84	0,8	-2,2	2,78E-02	2,06E-01	12	1	5	7	10	3	83	165	190	558	492	696	4	1	-0,17	-2,00	1,82	NELFA	chr4:2008637:-	chr4_2006911_-;chr4_2006928_-	uc003gem.3:1985045:2010719:-
chr5:52397919-52397970:mpeak_59494|chr5_52394497_52405602_MOCS2_NM_-|	44	1,83	0,9	-2,0	4,34E-02	2,69E-01	3	4	10	3	3	0	76	82	92	96	85	79	7	4	1,51	-0,06	1,57	MOCS2	-	-	uc003joz.3:52394431:52403004:-
chr3:37317343-37317528:mpeak_51406|chr3_37284681_37407570_GOLGA4_NM_+|	68	1,83	0,7	-2,7	6,91E-03	9,17E-02	160	99	125	103	80	119	10	20	6	22	45	30	1057	312	0,35	-1,41	1,76	GOLGA4	-	chr3_37275941_+	uc003cgu.2:37285041:37330782:+;uc010hgr.2:37285041:37369314:+;uc003cgv.3:37285041:37402763:+;uc003cgw.3:37285041:37407594:+;uc010hgs.3:37285041:37407594:+
chr11:57439478-57439630:mpeak_12800|chr11_57435473_57467337_ZDHHC5_NM_+|	57	1,83	0,7	-2,6	9,08E-03	1,08E-01	10	13	9	11	8	11	27	48	69	162	121	197	23	6	0,12	-1,74	1,86	ZDHHC5	chr11:57439628:+	-	-
chr1:16931898-16931967:mpeak_723|chr1_16890681_16940100_NBPF1_NM_-|	128	1,83	0,8	-2,3	2,06E-02	1,72E-01	3	28	14	30	31	19	47	99	50	504	383	327	23	7	-0,81	-2,63	1,82	NBPF1	chr1:16931912:-	chr1_16605418_-	-
chr14:104161155-104161207:mpeak_24678|chr14_104095524_104167537_KLC1_NM_+|	92	1,82	0,9	-2,0	4,47E-02	2,73E-01	9	4	3	1	5	0	117	166	161	205	189	246	4	2	1,31	-0,53	1,84	KLC1	chr14:104161205:+	chr14_103694869_+	uc010tyf.2:104120901:104167540:+;uc001yno.3:104120901:104167063:+
chr6:41907577-41907648:mpeak_64462|chr6_41903845_42016632_CCND3_NM_-|	272	1,82	0,8	-2,2	3,11E-02	2,20E-01	3	5	15	0	2	3	561	564	647	407	530	524	1	1	2,23	0,28	1,95	CCND3	chr6:41907571:-;chr6:41907596:-	chr6_41939834_-	uc003orm.3:41903677:41908737:-;uc003orn.3:41903677:41909387:-;uc003oro.3:41903677:41909387:-;uc003orp.3:41903677:41908278:-;uc011dul.1:41904919:41909387:-;uc011dum.1:41904919:41908278:-
chr1:29309100-29309150:mpeak_1385|chr1_29213602_29443330_EPB41_NM_+|	71	1,82	0,9	-2,1	3,97E-02	2,55E-01	5	5	5	3	2	1	118	155	128	119	167	140	4	1	1,54	-0,09	1,63	EPB41	-	chr1_28982638_+	-
chr6:33178790-33178844:mpeak_64109|chr6_33176285_33180074_RING1_NM_+|	115	1,81	0,9	-2,1	3,95E-02	2,54E-01	5	3	12	0	3	3	251	155	229	188	253	279	3	1	1,72	-0,18	1,90	RING1	chr6:33178842:+	chr6_33211064_+	uc011dqx.1:33176599:33179328:+;uc003odk.3:33176599:33180176:+;uc003odl.3:33177411:33180176:+
chr6:88408120-88408260:mpeak_65301|chr6_88385325_88411985_AKIRIN2_NM_-|	60	1,80	0,8	-2,3	2,14E-02	1,76E-01	9	8	6	32	12	8	21	29	24	184	238	152	31	9	-1,21	-2,96	1,75	AKIRIN2	chr6:88408121:-	chr6_87698404_-;chr6_87698457_-	uc003pmk.3:88385314:88411402:-
chr11:44139246-44139297:mpeak_12548|chr11_44117098_44265698_EXT2_NM_+|	177	1,79	0,9	-2,0	4,79E-02	2,81E-01	12	20	4	3	1	4	238	406	530	231	325	350	3	1	2,25	0,37	1,88	EXT2	chr11:44139298:+	chr11_44117746_+	uc010rfo.2:44097088:44265837:+;uc009ykt.3:44129262:44265837:+;uc001mxz.3:44129262:44265837:+;uc001mya.3:44117802:44265837:+
chr20:47438198-47438277:mpeak_47371|chr20_47242465_47444420_PREX1_NM_-|	1062	1,79	0,7	-2,7	8,00E-03	1,01E-01	34	75	29	16	15	17	1226	2085	2306	2689	1401	2848	2	1	1,50	-0,30	1,80	PREX1	chr20:47438198:-;chr20:47438225:-	chr20_48821678_-	uc002xtw.1:47242422:47444397:-
chr2:219093454-219093578:mpeak_45187|chr2_219081816_219118613_ARPC2_NM_+|	1083	1,79	0,7	-2,4	1,47E-02	1,44E-01	19	5	11	1	2	3	2256	2787	2600	1520	1996	1791	0	0	2,43	0,53	1,90	ARPC2	-	chr2_218228765_+;chr2_218228820_+	uc002vhd.4:219082193:219118638:+;uc002vhe.3:219082193:219118638:+
chr12:133330867-133330927:mpeak_20074|chr12_133304029_133338474_ANKLE2_NM_-|	85	1,79	0,7	-2,5	1,43E-02	1,41E-01	14	47	10	20	21	28	70	50	76	227	207	252	36	10	0,04	-1,80	1,84	ANKLE2	chr12:133330871:-	chr12_132754288_-	uc001ukx.2:133303827:133338384:-;uc001uky.3:133310601:133331714:-
chr3:158371212-158371263:mpeak_54292|chr3_158362316_158409124_GFM1_NM_+|	210	1,78	0,8	-2,2	2,60E-02	1,98E-01	17	3	17	5	1	5	367	527	374	378	417	406	3	1	1,77	0,08	1,69	GFM1	-	chr3_158653477_+	uc003fcd.3:158362423:158399958:+;uc003fce.3:158362423:158409256:+;uc003fcg.3:158363983:158409256:+
chr16:11120845-11121001:mpeak_28143|chr16_11038344_11272191_CLEC16A_NM_+|	44	1,78	0,8	-2,2	2,65E-02	2,01E-01	26	9	13	4	3	7	50	55	112	86	74	83	22	6	1,68	-0,17	1,85	CLEC16A	-	-	uc002dan.4:11038574:11220137:+;uc002dao.3:11038574:11272547:+;uc021tcy.1:11038574:11272547:+
chr14:20923694-20923872:mpeak_21877|chr14_20923289_20925149_APEX1_NM_+|	156	1,78	0,8	-2,1	3,49E-02	2,35E-01	232	141	174	168	93	203	37	147	36	330	134	176	248	73	0,24	-1,54	1,77	APEX1	-	chr14_20455587_+;chr14_20455660_+;chr14_20455676_+	uc001vxg.3:20923804:20925667:+;uc001vxh.3:20923804:20925667:+;uc001vxi.3:20923804:20925667:+;uc021rnr.1:20923804:20925667:+
chr1:23409587-23409664:mpeak_980|chr1_23345940_23409671_KDM1A_NM_+|	91	1,78	0,8	-2,1	3,44E-02	2,34E-01	8	20	4	4	2	4	150	143	217	180	139	225	6	2	1,74	-0,09	1,83	KDM1A	chr1:23409643:+;chr1:23409668:+	chr1_23083150_+	uc001bgj.2:23346089:23409857:+;uc001bgi.2:23346089:23409857:+
chr11:73586809-73586870:mpeak_14042|chr11_73584439_73587890_COA4_NM_-|	242	1,78	0,7	-2,4	1,57E-02	1,48E-01	3	13	11	3	3	2	528	570	421	500	418	433	2	1	1,89	0,17	1,72	COA4	chr11:73586818:-	chr11_73875774_-	-
chr9:116130856-116130913:mpeak_75952|chr9_116111811_116131895_BSPRY_NM_+|	239	1,76	0,6	-2,7	6,63E-03	8,97E-02	19	13	10	7	3	5	448	379	464	407	451	667	3	1	1,49	-0,24	1,74	BSPRY	chr9:116130908:+	chr9_113368626_+	uc004bhg.4:116111859:116132422:+;uc010muw.3:116111859:116131920:+
chr4:107239564-107239685:mpeak_57445|chr4_107236766_107268682_AIMP1_NM_+|	49	1,76	0,9	-2,0	4,16E-02	2,61E-01	23	21	6	1	8	2	90	125	86	69	95	67	17	5	2,22	0,38	1,84	AIMP1	-	chr4_106318459_+	uc003hyh.3:107237704:107268849:+
chr3:105480966-105481017:mpeak_52826|chr3_105378073_105587887_CBLB_NM_-|	16	1,75	0,8	-2,1	3,68E-02	2,44E-01	8	5	7	3	8	9	8	11	16	47	34	38	58	16	0,10	-1,75	1,85	CBLB	chr3:105480966:-	chr3_105762123_-	uc003dwc.3:105377813:105586421:-;uc011bhi.2:105377813:105588232:-;uc003dwd.2:105400317:105586421:-;uc003dwe.2:105400550:105586421:-
chr16:9204088-9204196:mpeak_28091|chr16_9185536_9210524_C16orf72_NM_+|	82	1,75	0,7	-2,4	1,53E-02	1,46E-01	19	6	6	15	9	15	44	84	45	220	304	217	18	5	-0,33	-2,10	1,76	C16orf72	-	chr16_9110260_+	uc002czm.3:9185901:9210769:+
chr3:196014396-196014538:mpeak_55170|chr3_195965765_196014584_PCYT1A_NM_-|	40	1,74	0,7	-2,3	2,04E-02	1,71E-01	96	48	45	41	71	76	12	9	4	22	25	32	762	237	0,01	-1,68	1,69	PCYT1A	-	-	-
chr7:156757052-156757126:mpeak_70605|chr7_156742416_156762222_NOM1_NM_+|	29	1,73	0,9	-2,0	4,53E-02	2,75E-01	8	1	12	8	5	3	31	42	24	80	59	79	22	8	0,39	-1,17	1,56	NOM1	chr7:156757128:+	chr7_156964430_+	uc003wmy.3:156742431:156762397:+
chr12:124197915-124197970:mpeak_19832|chr12_124196864_124242473_ATP6V0A2_NM_+|	70	1,72	0,8	-2,2	2,98E-02	2,14E-01	30	8	25	16	3	7	94	130	107	142	111	171	19	6	1,26	-0,36	1,62	ATP6V0A2	chr12:124197966:+	chr12_123713418_+	uc001ufq.1:124197112:124221899:+;uc001ufr.3:124197112:124242579:+
chr10:91393902-91393958:mpeak_10072|chr10_91344222_91405329_PANK1_NM_-|	42	1,72	0,6	-2,7	6,33E-03	8,71E-02	34	21	22	8	7	19	45	55	56	81	78	82	49	14	1,17	-0,62	1,79	PANK1	chr10:91393907:-	chr10_89634151_-;chr10_89634183_-	uc001kgn.2:91344162:91403481:-;uc001kgo.2:91344162:91403481:-;uc009xtu.2:91344162:91403468:-;uc001kgp.2:91344162:91405059:-
chr20:52197992-52198128:mpeak_47617|chr20_52185803_52199636_ZNF217_NM_-|	192	1,70	0,8	-2,0	4,42E-02	2,72E-01	26	5	11	34	7	13	125	112	195	572	666	536	10	3	-0,38	-2,04	1,66	ZNF217	-	-	uc002xwq.4:52188282:52199365:-;uc010gij.1:52192266:52199341:-
chr11:68142825-68142896:mpeak_13722|chr11_68080076_68216276_LRP5_NM_+|	60	1,70	0,7	-2,3	2,28E-02	1,84E-01	35	9	34	7	6	9	118	82	120	132	85	81	24	7	1,81	0,10	1,71	LRP5	chr11:68142891:+	chr11_68375422_+	uc001ont.3:68080182:68216538:+
chr19:46293932-46293995:mpeak_39023|chr19_46287548_46296060_DMWD_NM_-|	51	1,69	0,8	-2,0	4,51E-02	2,74E-01	17	6	40	4	9	12	55	79	92	97	106	90	28	9	1,33	-0,38	1,71	DMWD	chr19:46293940:-;chr19:46293965:-	chr19_45790691_-	uc002pdj.1:46287500:46296014:-
chr19:16965124-16965393:mpeak_37753|chr19_16940197_16989307_SIN3B_NM_+|	86	1,69	0,5	-3,1	1,64E-03	3,84E-02	30	26	50	27	39	36	52	70	82	170	207	244	52	16	0,08	-1,60	1,68	SIN3B	chr19:16965196:+;chr19:16965263:+;chr19:16965326:+;chr19:16965370:+;chr19:16965398:+	chr19_16854384_+;chr19_16854453_+;chr19_16854532_+;chr19_16854581_+	uc002ney.2:16940231:16989538:+;uc002nez.2:16940231:16989538:+
chr19:16965589-16965868:mpeak_37754|chr19_16940197_16989307_SIN3B_NM_+|	134	1,67	0,5	-3,3	1,03E-03	3,05E-02	82	146	174	123	118	142	52	70	82	170	207	244	196	62	0,07	-1,60	1,67	SIN3B	chr19:16965640:+;chr19:16965668:+;chr19:16965709:+;chr19:16965735:+;chr19:16965779:+;chr19:16965861:+	chr19_16854856_+;chr19_16854897_+;chr19_16854919_+;chr19_16854967_+;chr19_16854998_+;chr19_16855049_+	uc002ney.2:16940231:16989538:+;uc002nez.2:16940231:16989538:+
chr7:156755987-156756049:mpeak_70604|chr7_156742416_156762222_NOM1_NM_+|	40	1,66	0,6	-2,6	8,36E-03	1,03E-01	22	26	48	18	24	28	31	42	24	80	59	79	99	32	0,47	-1,17	1,64	NOM1	chr7:156756042:+	chr7_156963352_+	uc003wmy.3:156742431:156762397:+
chr16:4477293-4477455:mpeak_27949|chr16_4475805_4505546_DNAJA3_NM_+|	150	1,66	0,7	-2,4	1,74E-02	1,56E-01	12	4	7	4	2	7	193	194	216	455	307	395	4	1	0,79	-0,94	1,72	DNAJA3	chr16:4477381:+;chr16:4477451:+	chr16_4427378_+;chr16_4427449_+	uc002cwk.3:4475882:4504915:+;uc002cwl.3:4475882:4505569:+;uc010uxk.2:4475992:4505569:+
chr14:81651865-81651919:mpeak_23985|chr14_81646674_81687575_GTF2A1_NM_-|	94	1,66	0,8	-2,0	4,72E-02	2,79E-01	58	25	13	26	11	19	58	184	101	209	225	197	28	9	0,78	-0,88	1,66	GTF2A1	-	-	uc001xve.2:81646566:81670430:-;uc001xvf.2:81646566:81686862:-;uc001xvg.2:81646566:81682771:-
chr12:49718076-49718249:mpeak_16771|chr12_49716970_49725355_TROAP_NM_+|	60	1,66	0,7	-2,4	1,52E-02	1,46E-01	73	52	47	43	30	51	28	35	65	72	74	150	134	42	0,47	-1,20	1,68	TROAP	chr12:49718115:+;chr12:49718160:+;chr12:49718197:+;chr12:49718265:+	chr12_49324393_+	uc001rtx.4:49717391:49725400:+;uc009zlh.3:49717391:49725400:+
chr22:36234449-36234746:mpeak_49837|chr22_36140296_36424585_RBFOX2_NM_-|	100	1,65	0,7	-2,5	1,17E-02	1,26E-01	140	63	66	38	38	22	77	161	151	159	113	170	69	22	1,46	-0,18	1,64	RBFOX2	-	-	uc003aol.4:36140251:36236265:-;uc003aoj.4:36140251:36236265:-;uc003aok.4:36140241:36236265:-;uc003aoh.4:36140241:36236265:-;uc003aom.4:36140251:36236265:-;uc003aon.4:36140251:36424473:-;uc003aoo.4:36140251:36424473:-
chr10:32304430-32304485:mpeak_8777|chr10_32300444_32345371_KIF5B_NM_-|	243	1,64	0,8	-2,0	4,55E-02	2,75E-01	90	63	21	7	13	11	499	926	301	304	397	281	10	3	2,49	0,81	1,68	KIF5B	-	-	-
chr11:69486137-69486255:mpeak_13813|chr11_69482355_69490165_ORAOV1_NM_-|	99	1,63	0,7	-2,2	2,60E-02	1,98E-01	56	24	30	23	6	17	111	203	142	153	161	258	24	8	1,27	-0,33	1,60	ORAOV1	chr11:69486125:-;chr11:69486201:-	chr11_69671381_-;chr11_69671434_-	uc010rqi.1:69471369:69490007:-;uc001opc.3:69482286:69490007:-;uc001opd.3:69482286:69490007:-
chr9:131028560-131028615:mpeak_76481|chr9_131019560_131038268_GOLGA2_NM_-|	836	1,63	0,8	-2,1	3,52E-02	2,37E-01	9	3	12	4	2	5	1188	1308	1802	1407	1745	2544	1	0	1,16	-0,41	1,57	GOLGA2	chr9:131028565:-	-	uc004bul.1:131023451:131030713:-;uc004bum.1:131025314:131030713:-;uc011maw.2:131019345:131038255:-;uc010mxw.3:131019345:131038219:-
chr14:23945270-23945364:mpeak_22100|chr14_23938897_23946711_NGDN_NM_+|	269	1,63	0,8	-2,0	4,67E-02	2,77E-01	5	3	10	31	14	8	71	107	153	832	844	1151	5,22	2	-1,61	-3,09	1,49	NGDN	-	-	uc001wjy.3:23938924:23947235:+;uc001wjz.3:23938924:23946777:+
chr1:230410240-230410317:mpeak_7521|chr1_230193535_230415048_GALNT2_NM_+|	90	1,63	0,7	-2,4	1,68E-02	1,53E-01	47	29	35	24	11	13	75	190	132	212	118	193	28	9	1,19	-0,40	1,59	GALNT2	-	chr1_230274558_+	uc001htu.2:230398346:230415204:+;uc010pvy.1:230193813:230415204:+;uc010pwa.1:230203027:230415204:+
chr19:15303756-15303813:mpeak_37645|chr19_15272525_15311792_NOTCH3_NM_-|	100	1,62	0,7	-2,3	2,07E-02	1,73E-01	34	20	14	4	10	9	139	159	231	174	143	262	13	4	1,56	-0,13	1,69	NOTCH3	chr19:15303758:-	-	uc002nan.3:15271472:15311716:-;uc002nao.1:15288337:15311716:-
chr14:78205304-78205376:mpeak_23940|chr14_78184629_78227497_SNW1_NM_-|	84	1,62	0,6	-2,8	4,49E-03	7,02E-02	34	15	35	41	25	23	50	84	66	208	218	206	42	14	-0,08	-1,66	1,57	SNW1	-	-	uc001xuf.3:78184430:78227470:-;uc010tvm.2:78184430:78217766:-;uc010tvn.1:78184405:78227470:-
chr2:55889087-55889150:mpeak_41460|chr2_55863527_55921045_PNPT1_NM_-|	35	1,61	0,8	-2,1	3,48E-02	2,35E-01	29	19	9	5	10	7	33	63	52	53	80	54	39	12	1,32	-0,34	1,66	PNPT1	-	chr2_55662012_-	uc002rzf.3:55863371:55920958:-
chr12:122468634-122468696:mpeak_19607|chr12_122459791_122496997_BCL7A_NM_+|	174	1,61	0,5	-3,3	1,09E-03	3,13E-02	263	194	319	299	287	302	26	40	30	147	79	105	813	267	-0,20	-1,80	1,60	BCL7A	chr12:122468687:+	chr12_122030781_+	uc001ubo.3:122459997:122497069:+;uc001ubp.3:122459997:122497069:+
chr6:136681119-136681186:mpeak_66087|chr6_136665376_136871957_MAP7_NM_-|	156	1,60	0,7	-2,3	2,24E-02	1,81E-01	29	11	37	8	5	10	204	421	310	261	321	256	8	3	1,75	0,16	1,59	MAP7	chr6:136681119:-	-	uc011edf.2:136665365:136787920:-;uc010kgu.3:136665365:136847102:-;uc011edg.2:136665365:136847102:-;uc011edh.2:136665365:136847102:-;uc010kgv.3:136665365:136847102:-;uc010kgs.3:136665365:136709618:-;uc011edi.2:136665365:136709618:-;uc010kgq.2:136665365:136871546:-;uc003qgz.3:136665365:136871546:-;uc003qha.2:136665365:136871546:-
chr12:53418374-53418428:mpeak_17054|chr12_53400041_53433926_EIF4B_NM_+|	492	1,60	0,7	-2,1	3,16E-02	2,23E-01	2	10	8	1	1	4	851	1010	1046	1001	1040	925	1	0	1,71	-0,03	1,74	EIF4B	chr12:53418425:+	chr12_53024640_+	uc001sbh.4:53400267:53434007:+;uc010snu.2:53400267:53434007:+;uc010snv.2:53400267:53434007:+
chr15:75688584-75688664:mpeak_26689|chr15_75664550_75748124_SIN3A_NM_-|	40	1,59	0,7	-2,1	3,17E-02	2,23E-01	21	21	6	16	23	15	19	35	30	100	70	117	58	19	-0,14	-1,77	1,63	SIN3A	-	chr15_75396263_-	uc002bai.3:75664319:75722716:-;uc002baj.3:75664319:75722716:-;uc010uml.2:75664319:75722716:-
chr7:132719895-132720115:mpeak_69958|chr7_132470421_132766828_CHCHD3_NM_-|	647	1,58	0,8	-2,0	4,40E-02	2,72E-01	2109	749	1937	1072	593	852	30	113	35	114	88	77	2692	903	0,93	-0,65	1,58	CHCHD3	chr7:132719967:-;chr7:132720017:-;chr7:132720106:-	chr7_133035267_-	uc011kpn.1:132658736:132766697:-;uc003vre.3:132470397:132766697:-;uc022alw.1:132470397:132766697:-
chr12:123801834-123801912:mpeak_19766|chr12_123780597_123834988_SBNO1_NM_-|	81	1,58	0,8	-2,1	3,71E-02	2,44E-01	27	28	18	23	17	5	99	148	60	158	189	199	24	8	0,70	-0,83	1,53	SBNO1	-	-	uc010tao.2:123780454:123834988:-;uc010tap.2:123780454:123834988:-
chr12:109921661-109921771:mpeak_18930|chr12_109915427_109972395_UBE3B_NM_+|	114	1,58	0,7	-2,4	1,73E-02	1,56E-01	21	31	43	11	8	8	131	325	220	215	150	200	14	5	1,80	0,26	1,54	UBE3B	-	chr12_109483962_+	uc001tom.4:109921356:109928399:+;uc001ton.4:109921356:109928399:+;uc001tor.4:109921356:109928399:+;uc009zvj.2:109921356:109964219:+;uc001top.4:109921356:109972587:+;uc001toq.4:109921356:109972587:+
chr10:5933276-5933418:mpeak_8126|chr10_5931534_5979072_FBXO18_NM_+|	144	1,58	0,7	-2,2	2,76E-02	2,06E-01	28	21	6	4	7	9	211	243	321	265	285	324	7	2	1,51	-0,17	1,69	FBXO18	-	chr10_5891362_+	uc001iis.4:5932308:5979243:+
chr19:16967857-16967972:mpeak_37757|chr19_16940197_16989307_SIN3B_NM_+|	77	1,57	0,7	-2,3	1,91E-02	1,65E-01	17	16	15	5	15	27	52	70	82	170	207	244	24	8	0,04	-1,60	1,64	SIN3B	chr19:16967914:+	chr19_16857105_+;chr19_16857162_+	uc002ney.2:16940231:16989538:+;uc002nez.2:16940231:16989538:+
chr8:141856360-141856438:mpeak_73572|chr8_141669777_142011412_PTK2_NM_-|	92	1,56	0,6	-2,4	1,57E-02	1,48E-01	35	33	13	19	13	11	108	159	114	155	256	184	21	7	0,91	-0,65	1,55	PTK2	chr8:141856359:-	chr8_140846261_-	uc003yvr.3:141669564:141889628:-;uc003yvs.3:141669564:141900836:-;uc011ljr.2:141669564:141900836:-;uc003yvu.3:141669564:141900836:-;uc003yvt.3:141669564:141994210:-;uc003yvv.3:141669564:141900664:-
chr1:111736544-111736658:mpeak_3671|chr1_111730303_111747160_DENND2D_NM_-|	61	1,56	0,8	-2,0	4,47E-02	2,73E-01	8	6	14	8	5	3	131	54	92	145	139	122	10	4	0,86	-0,55	1,41	DENND2D	chr1:111736559:-;chr1:111736607:-	chr1_111193922_-;chr1_111193986_-	uc001eak.2:111730226:111743081:-;uc001eal.2:111730226:111746975:-
chr15:101815452-101815568:mpeak_27432|chr15_101811850_101817725_VIMP_NM_-|	146	1,55	0,7	-2,2	3,04E-02	2,17E-01	355	312	290	219	232	219	6	28	7	15	28	36	2351	847	0,52	-0,96	1,47	VIMP	-	chr15_101275305_-	uc021sxu.1:101812975:101817622:-;uc021sxv.1:101812975:101817622:-
chr6:132165634-132165777:mpeak_65984|chr6_132129155_132211480_ENPP1_NM_+|	172	1,55	0,7	-2,1	3,73E-02	2,45E-01	30	18	21	3	8	0	444	374	539	209	210	209	5,07	3	2,63	1,11	1,52	ENPP1	-	-	uc011ecf.2:132129175:132211651:+
chr12:123815778-123815906:mpeak_19770|chr12_123780597_123834988_SBNO1_NM_-|	75	1,55	0,7	-2,1	3,73E-02	2,45E-01	16	8	8	9	6	5	99	148	60	158	189	199	10	4	0,66	-0,83	1,49	SBNO1	-	chr12_123331312_-	uc010tao.2:123780454:123834988:-;uc010tap.2:123780454:123834988:-;uc001ueu.2:123805246:123834988:-;uc001uet.2:123805246:123834988:-;uc001uev.2:123805246:123834988:-;uc009zxy.1:123805246:123834988:-
chr3:195997324-195997422:mpeak_55169|chr3_195965765_196014584_PCYT1A_NM_-|	36	1,55	0,8	-2,0	4,48E-02	2,73E-01	83	33	37	42	61	69	12	9	4	22	25	32	614	217	-0,18	-1,68	1,50	PCYT1A	-	chr3_196270500_-	uc003fwg.3:195965558:195997402:-;uc003fwh.3:195965558:195997402:-
chr16:90025648-90025807:mpeak_30861|chr16_90015138_90032268_DEF8_NM_+|	98	1,55	0,4	-3,6	3,33E-04	1,81E-02	191	159	162	97	88	109	30	47	58	78	79	74	380	128	0,80	-0,78	1,58	DEF8	chr16:90025774:+	chr16_89959275_+;chr16_89959311_+	uc002fpn.2:90015873:90032371:+;uc002fpo.2:90020660:90032371:+;uc002fpp.2:90020660:90032371:+;uc021tmv.1:90020660:90032371:+;uc010vpq.2:90021632:90032371:+;uc010vpr.2:90020660:90032371:+
chr10:82269968-82270038:mpeak_9911|chr10_82214037_82277660_TSPAN14_NM_+|	228	1,55	0,6	-2,5	1,37E-02	1,38E-01	9	21	27	12	12	13	214	311	398	566	445	706	6	2	0,63	-0,90	1,53	TSPAN14	chr10:82270026:+;chr10:82270056:+	chr10_80510286_+	uc001kcj.4:82248989:82277732:+;uc009xss.3:82248989:82277732:+;uc001kci.4:82248989:82277732:+
chr14:102302837-102302912:mpeak_24492|chr14_102228134_102391477_PPP2R5C_NM_+|	70	1,54	0,6	-2,5	1,22E-02	1,28E-01	31	34	16	12	11	5	112	140	120	130	120	111	22	8	1,55	0,04	1,50	PPP2R5C	chr14:102302895:+	chr14_101836519_+;chr14_101836570_+	uc010txs.1:102276309:102348626:+;uc010txt.2:102276309:102372870:+;uc001ykn.3:102276279:102378834:+;uc010txr.2:102228230:102391609:+;uc001ykk.3:102228230:102391609:+;uc001yko.3:102276279:102391609:+;uc001ykp.3:102276279:102391609:+
chr9:138773470-138773535:mpeak_76947|chr9_138703457_138799005_CAMSAP1_NM_-|	99	1,54	0,7	-2,2	3,11E-02	2,20E-01	17	3	9	7	7	11	91	98	140	215	287	301	9	3	0,28	-1,29	1,56	CAMSAP1	-	-	uc004cgq.4:138703154:138774721:-;uc004cgr.4:138703154:138799005:-
chr10:76014580-76014636:mpeak_9748|chr10_75910942_76468078_ADK_NM_+|	110	1,54	0,6	-2,5	1,14E-02	1,25E-01	15	10	19	8	4	5	161	249	190	224	197	234	7	3	1,31	-0,13	1,44	ADK	-	chr10_74254875_+	uc001jwi.3:75911036:76468203:+;uc010qlb.2:75911036:76468203:+;uc001jwj.3:75936630:76468203:+;uc010qlc.2:75936630:76468203:+
chr6:28879079-28879135:mpeak_63752|chr6_28872442_28891768_TRIM27_NM_-|	56	1,53	0,7	-2,1	3,60E-02	2,40E-01	0	8	9	5	10	6	43	47	44	159	163	173	18	4	-0,41	-1,89	1,47	TRIM27	chr6:28879084:-	chr6_28911291_-	uc003nlr.3:28871846:28891409:-;uc003nls.3:28872031:28891409:-;uc003nlt.1:28876555:28891409:-
chr19:4694327-4694399:mpeak_36889|chr19_4676668_4723855_DPP9_NM_-|	134	1,53	0,7	-2,3	2,12E-02	1,75E-01	16	19	37	7	6	11	255	180	332	284	201	260	9	3	1,58	0,04	1,54	DPP9	chr19:4694341:-	chr19_4694336_-	uc002mba.3:4676575:4719918:-
chr1:31433280-31433342:mpeak_1420|chr1_31406189_31538564_PUM1_NM_-|	177	1,53	0,7	-2,1	3,27E-02	2,28E-01	17	3	8	5	11	19	119	142	167	578	513	545	7	2	-0,33	-1,94	1,60	PUM1	chr1:31433284:-	chr1_30960445_-	uc001bsf.1:31406057:31465377:-;uc001bsh.1:31406057:31532413:-;uc001bsi.1:31406057:31532413:-;uc001bsj.1:31406057:31532413:-;uc010oga.1:31406057:31532413:-;uc001bsk.1:31406057:31538632:-;uc010ogb.1:31406057:31538632:-
chr13:46040709-46040766:mpeak_20939|chr13_46039029_46108836_COG3_NM_+|	34	1,52	0,7	-2,1	4,00E-02	2,55E-01	16	28	21	15	14	22	15	50	25	73	80	50	72	25	0,36	-1,17	1,53	COG3	chr13:46040764:+	-	uc001vai.3:46039171:46067629:+;uc001vak.3:46039171:46108866:+
chr12:133310425-133310572:mpeak_20069|chr12_133304029_133338474_ANKLE2_NM_-|	89	1,49	0,6	-2,4	1,57E-02	1,48E-01	17	20	43	28	48	26	70	50	76	227	207	252	41	15	-0,34	-1,80	1,47	ANKLE2	chr12:133310445:-;chr12:133310515:-	chr12_132733863_-;chr12_132733930_-	uc001ukx.2:133303827:133338384:-
chr17:66099231-66099286:mpeak_34503|chr17_66097695_66121725_LINC00674_NR_+|	211	1,48	0,7	-2,0	4,18E-02	2,62E-01	13	11	8	4	4	1	582	468	394	399	291	353	2	1	1,84	0,47	1,37	LINC00674	chr17:66099284:+	chr17_68103147_+	-
chr16:11260739-11260909:mpeak_28151|chr16_11038344_11272191_CLEC16A_NM_+|	43	1,45	0,7	-2,0	4,76E-02	2,81E-01	10	16	15	3	8	6	50	55	112	86	74	83	19	7	1,36	-0,17	1,53	CLEC16A	chr16:11260791:+;chr16:11260831:+;chr16:11260876:+;chr16:11260901:+	chr16_11166987_+;chr16_11167032_+	uc002dao.3:11038574:11272547:+;uc021tcy.1:11038574:11272547:+
chr12:122735365-122735420:mpeak_19635|chr12_122716974_122751068_VPS33A_NM_-|	130	1,44	0,7	-2,0	4,63E-02	2,76E-01	17	6	19	9	3	4	191	263	311	186	247	297	6	2	1,36	0,07	1,29	VPS33A	chr12:122735367:-	chr12_122250822_-	uc001ucd.3:122716792:122750955:-
chr5:57754806-57754911:mpeak_59618|chr5_57750601_57755966_PLK2_NM_-|	320	1,43	0,7	-2,0	4,12E-02	2,60E-01	86	28	62	518	183	497	50	48	31	842	713	787	136	51	-2,77	-4,18	1,42	PLK2	-	chr5_58459034_-	uc011cql.1:57754109:57754895:-;uc021xyx.1:57750409:57755786:-;uc003jrn.3:57750409:57755786:-
chr7:4794624-4794684:mpeak_67187|chr7_4721929_4801814_FOXK1_NM_+|	183	1,43	0,7	-2,1	3,40E-02	2,32E-01	6	6	9	7	6	11	114	187	246	508	533	562	4	1	-0,12	-1,55	1,43	FOXK1	chr7:4794689:+	chr7_4755053_+	uc003snc.1:4721939:4802095:+;uc003sna.1:4714885:4802095:+
chr7:26236012-26236098:mpeak_67671|chr7_26231958_26240413_HNRNPA2B1_NM_-mpeak_67671|chr7_26231958_26240413_HNRNPA2B1_NM_-||	2799	1,42	0,6	-2,3	1,89E-02	1,64E-01	20	9	25	7	5	5	6085	7266	5577	4738	5677	4170	0	0	1,70	0,38	1,33	HNRNPA2B1	chr7:26236028:-;chr7:26236055:-	chr7_26196424_-;chr7_26196442_-;chr7_26196471_-	uc003sxr.4:26232135:26240197:-;uc003sxs.4:26232135:26240197:-
chr19:10670281-10670382:mpeak_37240|chr19_10664957_10676702_KRI1_NM_-|	67	1,42	0,6	-2,3	2,25E-02	1,82E-01	33	25	36	59	36	34	26	65	36	176	118	162	74	28	-0,45	-1,84	1,39	KRI1	chr19:10670285:-	chr19_10559695_-	uc002mox.1:10664626:10676566:-;uc002moy.1:10664626:10676693:-
chr10:34632800-34632860:mpeak_8856|chr10_34400490_35104253_PARD3_NM_-|	26	1,41	0,7	-2,0	4,59E-02	2,75E-01	8	26	18	8	17	11	31	21	24	49	46	49	69	25	0,53	-0,91	1,44	PARD3	chr10:34632803:-	chr10_34343862_-	uc001ixs.1:34606036:34671825:-;uc001ixt.1:34606036:34759189:-;uc001ixu.2:34606036:35103923:-;uc010qej.2:34400096:35103923:-;uc010qek.2:34400096:35103923:-;uc010qel.2:34400096:35103923:-;uc010qem.2:34400096:35103923:-;uc010qen.2:34400096:35103923:-;uc010qeo.2:34400096:35103923:-;uc010qep.2:34400096:35103923:-;uc010qeq.2:34400096:35103923:-;uc001ixo.2:34601279:34688337:-;uc001ixr.2:34601279:3510392…
chr3:9882939-9883066:mpeak_50676|chr3_9879891_9885702_RPUSD3_NM_-|	125	1,39	0,7	-2,1	3,48E-02	2,35E-01	29	58	41	31	18	12	168	175	247	141	287	288	22	9	1,07	-0,28	1,35	RPUSD3	chr3:9882941:-;chr3:9883004:-	chr3_9841245_-	uc011atk.2:9879699:9885698:-;uc011atl.2:9879699:9885698:-;uc011atm.1:9882098:9885674:-
chr2:242092874-242093014:mpeak_45857|chr2_242088987_242122061_PPP1R7_NM_+|	75	1,36	0,7	-2,0	4,44E-02	2,72E-01	22	10	10	3	3	7	133	172	155	115	149	124	9	3	1,72	0,25	1,48	PPP1R7	chr2:242093019:+	chr2_241153599_+	uc002was.3:242089910:242106483:+;uc010fzm.1:242089119:242109282:+;uc002wat.1:242089910:242122238:+;uc002wau.1:242089910:242122238:+
chr1:148568205-148568273:mpeak_4534|chr1_148558187_148594396_NBPF15_NM_+|	48	1,36	0,7	-2,0	4,66E-02	2,77E-01	12	15	14	22	12	8	33	69	40	131	128	98	28	12	-0,04	-1,33	1,29	NBPF15	-	-	-
chr7:100463106-100463169:mpeak_69237|chr7_100450340_100463340_SLC12A9_NM_+|	136	1,35	0,7	-2,0	4,61E-02	2,76E-01	8	8	10	4	2	5	251	218	292	258	236	342	3	1	1,21	-0,14	1,35	SLC12A9	chr7:100463171:+	chr7_100865565_+	uc003uwp.4:100451819:100464227:+;uc011kki.2:100459077:100464227:+;uc003uwr.3:100456491:100464227:+;uc003uws.3:100459077:100464227:+;uc003uwt.3:100456491:100464227:+;uc003uwv.3:100459077:100464227:+
chr9:84248382-84248441:mpeak_74940|chr9_84199220_84304450_TLE1_NM_-|	466	1,34	0,6	-2,1	3,17E-02	2,23E-01	59	145	50	188	147	116	193	355	340	1469	1183	1349	29	11	-0,83	-2,17	1,35	TLE1	chr9:84248387:-	chr9_81633469_-	uc004aly.3:84199112:84303155:-;uc004alz.3:84199112:84303155:-;uc011lsr.2:84199112:84303155:-;uc004ama.1:84205715:84303155:-;uc011lss.1:84226683:84303155:-
chr5:176863578-176863691:mpeak_62671|chr5_176853686_176868735_GRK6_NM_+|	93	1,33	0,5	-2,5	1,30E-02	1,34E-01	30	33	50	11	15	15	174	156	173	114	146	199	22	9	1,47	0,13	1,33	GRK6	chr5:176863686:+	chr5_177436615_+;chr5_177436636_+;chr5_177436681_+	uc003mgq.2:176853846:176868251:+;uc021yit.1:176853846:176868791:+;uc021yiu.1:176853846:176868828:+;uc003mgs.1:176858937:176868054:+
chr19:2328468-2328611:mpeak_36727|chr19_2321821_2328614_LSM7_NM_-|	110	1,33	0,5	-2,5	1,15E-02	1,25E-01	17	18	22	4	5	7	239	245	231	176	177	181	8	3	1,80	0,42	1,38	LSM7	-	chr19_2328472_-;chr19_2328563_-	uc002lvp.4:2321678:2328565:-
chr11:63590785-63590913:mpeak_13205|chr11_63580845_63594399_C11orf84_NM_+|	71	1,33	0,5	-2,5	1,38E-02	1,39E-01	15	15	10	15	14	13	69	54	86	191	183	185	19	8	-0,06	-1,42	1,36	C11orf84	chr11:63590843:+	-	uc001nxt.3:63581158:63594611:+
chr18:32409234-32409296:mpeak_35917|chr18_32073253_32467729_DTNA_NM_+|	85	1,32	0,5	-2,7	6,62E-03	8,97E-02	31	36	53	42	43	53	63	82	54	220	178	163	61	25	-0,20	-1,50	1,30	DTNA	chr18:32409288:+	chr18_34829339_+	uc010xby.1:32398168:32464709:+;uc021uiq.1:32398168:32438360:+;uc021uir.1:32398168:32438360:+;uc002kyd.4:32400832:32446125:+;uc010dmo.3:32400832:32443991:+;uc010xbz.2:32400832:32464709:+;uc002kye.3:32400832:32464709:+;uc010xca.2:32400832:32464709:+;uc010xbx.2:32335940:32446125:+;uc002kxv.4:32335940:32446125:+;uc002kxw.2:32335940:32464709:+;uc002kxz.2:32335940:32464709:+;uc002kxy.2:32335940:3246470…
chr14:103434601-103434716:mpeak_24607|chr14_103400180_103523742_CDC42BPB_NM_-|	125	1,32	0,6	-2,4	1,62E-02	1,50E-01	37	40	25	20	19	10	143	235	234	258	236	245	17	7	1,04	-0,27	1,31	CDC42BPB	-	-	uc001ymi.1:103400048:103523510:-
chr11:20389147-20389212:mpeak_12211|chr11_20385230_20404525_HTATIP2_NM_+|	128	1,31	0,6	-2,3	1,90E-02	1,64E-01	19	35	21	8	9	5	273	307	241	209	229	176	9	4	1,72	0,42	1,30	HTATIP2	chr11:20389158:+;chr11:20389201:+	chr11_20367617_+;chr11_20367652_+	uc009yia.1:20385783:20404751:+;uc009yib.1:20385783:20404751:+;uc001mpx.2:20385357:20404751:+;uc001mpz.2:20385783:20404751:+
chr12:98929346-98929430:mpeak_18523|chr12_98909350_98941350_TMPO_NM_+|	620	1,26	0,5	-2,4	1,60E-02	1,49E-01	690	959	854	424	598	605	262	658	375	665	770	578	193	81	0,62	-0,64	1,26	TMPO	chr12:98929407:+	chr12_98535573_+;chr12_98535627_+	uc001tfi.2:98909645:98931434:+;uc001tfj.3:98909645:98941636:+;uc001tfk.3:98909645:98941636:+
chr8:109245592-109245673:mpeak_73017|chr8_109214152_109260959_EIF3E_NM_-|	301	1,24	0,5	-2,4	1,87E-02	1,64E-01	41	30	28	15	12	13	496	793	501	580	658	440	6	2	1,33	0,09	1,24	EIF3E	chr8:109245593:-;chr8:109245623:-	chr8_108233394_-	uc003ymt.3:109214113:109254085:-;uc003ymu.3:109214113:109260931:-
chr14:69261388-69261536:mpeak_23415|chr14_69257209_69262960_ZFP36L1_NM_-|	742	1,21	0,6	-2,0	4,78E-02	2,81E-01	36	14	9	28	30	28	547	751	642	1957	2473	2389	3	1	-0,57	-1,81	1,24	ZFP36L1	chr14:69261456:-	chr14_68794738_-	uc021rve.1:69256249:69262866:-
chr3:48966045-48966110:mpeak_51829|chr3_48956280_49020631_ARIH2_NM_+|	181	1,20	0,6	-2,0	4,55E-02	2,75E-01	9	14	9	7	5	5	273	375	327	328	387	436	3	1	0,94	-0,24	1,19	ARIH2	chr3:48966053:+;chr3:48966104:+	chr3_48928620_+;chr3_48928666_+	uc003cvb.3:48964991:49020703:+;uc003cvc.3:48964991:49020703:+;uc010hkl.3:48964991:49020703:+
chr17:35500753-35500838:mpeak_32618|chr17_35444374_35766902_ACACA_NM_-|	417	1,17	0,5	-2,2	2,84E-02	2,08E-01	1014	637	691	453	593	530	127	179	125	280	254	120	544	241	0,57	-0,60	1,18	ACACA	-	-	uc010cuy.3:35444250:35562705:-;uc002hnk.3:35444250:35641864:-;uc002hnl.3:35444250:35656257:-;uc002hnm.3:35444250:35687339:-;uc002hnn.3:35444250:35687339:-;uc002hno.3:35444250:35766389:-
chr15:83826104-83826309:mpeak_26993|chr15_83808027_83876770_HDGFRP3_NM_-|	83	1,17	0,5	-2,4	1,84E-02	1,62E-01	113	145	96	41	63	50	73	111	62	74	88	80	144	64	1,20	0,02	1,17	HDGFRP3	chr15:83826103:-	chr15_83157483_-	uc002bjs.2:83808021:83876166:-
chr9:127965625-127965697:mpeak_76318|chr9_127962820_127995966_RABEPK_NM_+|	179	1,12	0,5	-2,1	3,87E-02	2,52E-01	20	18	22	4	10	14	361	308	309	292	358	432	6	3	1,06	-0,14	1,21	RABEPK	chr9:127965685:+	chr9_125203406_+	uc004bph.2:127965292:127982847:+;uc004bpi.3:127965292:127996259:+;uc004bpj.3:127965292:127996259:+;uc004bpk.3:127965292:127996259:+
chr12:132419417-132419495:mpeak_19973|chr12_132413744_132428083_PUS1_NM_+|	109	1,11	0,5	-2,1	3,91E-02	2,52E-01	43	31	37	39	50	68	73	62	120	234	239	314	44	20	-0,49	-1,63	1,13	PUS1	chr12:132419473:+	chr12_131934923_+	uc001uji.3:132416575:132428131:+;uc001ujg.3:132414461:132428131:+;uc001ujh.3:132414461:132428131:+;uc001ujf.3:132414267:132428131:+
chr11:70253797-70253964:mpeak_13845|chr11_70244611_70281131_CTTN_NM_+|	2324	1,10	0,5	-2,3	2,13E-02	1,76E-01	43	57	45	22	27	23	2860	5589	4884	4804	4685	4852	1	1	1,01	-0,11	1,11	CTTN	chr11:70253854:+;chr11:70253960:+	chr11_70407767_+;chr11_70407794_+;chr11_70407833_+;chr11_70407852_+	uc001opu.3:70253403:70282514:+;uc001opv.4:70253403:70281268:+;uc001opw.4:70253403:70281268:+
chr14:31425342-31425451:mpeak_22246|chr14_31364786_31495607_STRN3_NM_-|	200	1,09	0,5	-2,0	4,67E-02	2,77E-01	100	57	61	51	63	36	227	303	293	305	565	342	26	12	0,53	-0,56	1,09	STRN3	-	chr14_30956245_-	uc001wqu.2:31364616:31495391:-;uc001wqv.2:31364616:31495391:-
chr9:37836258-37836373:mpeak_74617|chr9_37800550_37861136_DCAF10_NM_+|	58	1,06	0,5	-2,1	3,46E-02	2,34E-01	54	34	31	26	17	20	90	73	81	80	94	93	49	24	0,92	-0,13	1,05	DCAF10	-	-	uc010mlz.3:37800624:37861505:+;uc004aao.3:37800863:37861505:+
chr1:174969272-174969338:mpeak_5928|chr1_174968570_174979058_CACYBP_NM_+|	519	1,01	0,5	-2,0	4,14E-02	2,61E-01	171	75	91	72	52	50	816	1044	968	953	1047	891	12	6	0,97	-0,03	1,00	CACYBP	-	chr1_175000188_+	uc010pmw.2:174969316:174974130:+;uc001gkj.1:174969316:174979215:+
chr3:186293618-186293674:mpeak_54946|chr3_186288464_186303132_DNAJB11_NM_+|	540	1,01	0,4	-2,3	2,20E-02	1,79E-01	89	67	64	41	19	35	1097	1128	1084	803	1111	941	7	3	1,21	0,21	1,00	DNAJB11	-	chr3_186575857_+	uc003fqi.3:186288686:186303197:+
chr14:104160325-104160384:mpeak_24677|chr14_104095524_104167537_KLC1_NM_+|	101	1,00	0,5	-2,1	3,88E-02	2,52E-01	23	28	23	15	21	17	117	166	161	205	189	246	17	8	0,49	-0,53	1,02	KLC1	chr14:104160382:+;chr14:104160427:+	chr14_103694044_+;chr14_103694084_+	uc010tyf.2:104120901:104167540:+;uc001yno.3:104120901:104167063:+
chr1:46073895-46074016:mpeak_2173|chr1_46049659_46083732_NASP_NM_+|	193	0,99	0,4	-2,4	1,62E-02	1,50E-01	92	79	92	45	30	51	300	327	363	254	339	349	27	13	1,06	0,07	0,99	NASP	chr1:46074009:+	chr1_45608324_+	uc001cok.2:46072934:46074068:+;uc010olq.2:46049818:46079851:+;uc021omz.1:46056902:46081143:+;uc001coi.2:46049818:46083813:+;uc001coj.2:46049818:46083813:+;uc010olr.2:46049818:46083813:+
chr14:78197324-78197475:mpeak_23937|chr14_78184629_78227497_SNW1_NM_-|	181	0,96	0,4	-2,5	1,09E-02	1,21E-01	178	176	160	228	301	300	50	84	66	208	218	206	256	131	-0,69	-1,66	0,97	SNW1	-	-	uc001xuf.3:78184430:78227470:-;uc010tvm.2:78184430:78217766:-;uc010tvn.1:78184405:78227470:-
chr21:45107392-45107458:mpeak_48788|chr21_45079431_45113070_RRP1B_NM_+|	232	0,93	0,4	-2,4	1,47E-02	1,44E-01	59	82	61	86	96	99	170	249	206	500	554	618	32	17	-0,48	-1,42	0,94	RRP1B	-	chr21_43687570_+	uc002zdk.3:45079545:45113264:+
chr10:75542078-75542228:mpeak_9712|chr10_75541807_75542831_CHCHD1_NM_+|	196	0,93	0,4	-2,2	2,60E-02	1,98E-01	156	87	99	61	65	68	289	332	252	336	287	322	39	20	0,82	-0,12	0,94	CHCHD1	-	chr10_73782398_+	uc001jvb.2:75541833:75542250:+;uc001jvc.4:75541833:75542945:+
chr3:47676689-47676847:mpeak_51737|chr3_47629796_47823405_SMARCC1_NM_-|	670	0,92	0,5	-2,0	4,60E-02	2,75E-01	105	131	102	66	61	79	789	1217	1477	1284	1104	1629	10	5	0,72	-0,21	0,92	SMARCC1	-	chr3_47635249_-;chr3_47635287_-	uc003crq.2:47629698:47823287:-;uc011bbd.1:47629698:47787471:-
chr2:29117740-29117803:mpeak_40785|chr2_29117508_29169465_WDR43_NM_+|	151	0,88	0,4	-2,1	3,60E-02	2,40E-01	58	36	35	42	38	47	175	211	167	320	356	327	24	13	0,04	-0,86	0,90	WDR43	-	-	uc002rmo.2:29117564:29169645:+
chr2:233433851-233433928:mpeak_45614|chr2_233415296_233445613_EIF4E2_NM_+|	248	0,84	0,4	-2,1	3,86E-02	2,51E-01	551	457	541	311	292	391	52	65	84	77	67	89	769	427	0,64	-0,21	0,85	EIF4E2	chr2:233433859:+;chr2:233433886:+;chr2:233433920:+	chr2_232569209_+	uc002vtb.1:233415434:233445653:+
chr3:10011193-10011331:mpeak_50708|chr3_10005881_10028522_EMC3_NM_-|	510	-0,86	0,4	2,0	4,68E-02	2,78E-01	147	175	252	184	239	265	1119	800	1008	580	759	599	20	35	-0,26	0,60	-0,86	EMC3	chr3:10011205:-;chr3:10011231:-;chr3:10011261:-;chr3:10011318:-	chr3_9969522_-;chr3_9969577_-;chr3_9969636_-	uc003bun.3:10005752:10028345:-
chr5:134260786-134262022:mpeak_61456|chr5_134240809_134296275_PCBD2_NM_+|	122	-1,15	0,5	2,1	3,31E-02	2,29E-01	120	140	112	182	277	152	61	130	86	55	66	81	135	302	-0,72	0,45	-1,16	PCBD2	chr5:134261123:+;chr5:134261174:+;chr5:134261397:+;chr5:134261424:+;chr5:134261644:+;chr5:134261675:+	chr5_134925185_+;chr5_134925704_+;chr5_134925984_+;chr5_134926012_+	uc010jdz.3:134240829:134296371:+
chr5:134262201-134263134:mpeak_61460|chr5_134240809_134296275_PCBD2_NM_+|	104	-1,26	0,6	2,0	4,78E-02	2,81E-01	99	120	59	180	212	97	61	130	86	55	66	81	101	241	-0,82	0,45	-1,26	PCBD2	chr5:134262591:+;chr5:134262777:+;chr5:134262802:+;chr5:134263015:+	chr5_134927085_+;chr5_134927206_+	uc010jdz.3:134240829:134296371:+
chr6:33260598-33260735:mpeak_64132|chr6_33260090_33267165_RGL2_NM_-|	93	-1,27	0,6	2,0	4,91E-02	2,86E-01	3	19	8	28	22	27	147	146	195	143	155	228	6	15	-1,35	-0,11	-1,24	RGL2	chr6:33260618:-;chr6:33260683:-;chr6:33260710:-	chr6_33292826_-;chr6_33292936_-	uc003odu.3:33259878:33262497:-;uc010jur.3:33259878:33262497:-;uc003odv.3:33259878:33266387:-;uc003odw.3:33259878:33264547:-
chr8:145531423-145531568:mpeak_73816|chr8_145515269_145537787_HSF1_NM_+|	277	-1,29	0,6	2,3	2,34E-02	1,86E-01	8	0	8	15	19	19	456	453	526	572	576	675	2	3	-1,72	-0,34	-1,38	HSF1	chr8:145531558:+	chr8_144307806_+;chr8_144307870_+	uc003zbt.4:145515439:145537993:+
chr16:89835983-89836127:mpeak_30836|chr16_89805116_89883065_FANCA_NM_-|	64	-1,31	0,6	2,2	2,77E-02	2,06E-01	5	11	9	15	26	19	104	102	136	120	95	130	7	18	-1,30	-0,02	-1,28	FANCA	chr16:89835959:-;chr16:89836005:-	chr16_89769604_-	uc002fou.1:89805008:89883023:-;uc010vpn.1:89805105:89883023:-
chr1:116207338-116207404:mpeak_3963|chr1_116184573_116233739_VANGL1_NM_+|	152	-1,33	0,6	2,1	4,01E-02	2,55E-01	5	8	4	35	39	28	139	109	213	468	331	441	3	8	-2,69	-1,43	-1,27	VANGL1	chr1:116207390:+	chr1_115664768_+	uc009wgy.1:116194034:116234000:+;uc001efv.1:116194034:116234000:+;uc021ose.1:116194034:116234000:+
chr15:50578067-50578384:mpeak_25628|chr15_50570981_50647605_GABPB1_NM_-|	54	-1,38	0,7	2,1	3,43E-02	2,33E-01	29	38	12	101	101	108	29	44	27	51	65	37	79	202	-1,97	-0,62	-1,35	GABPB1	chr15:50578081:-;chr15:50578195:-	chr15_50285870_-;chr15_50285938_-;chr15_50285999_-	uc001zya.3:50570828:50601995:-;uc001zyb.3:50570828:50601995:-;uc010ufg.2:50570828:50596210:-
chr8:62546238-62546294:mpeak_71929|chr8_62416068_62627199_ASPH_NM_-|	45	-1,41	0,6	2,5	1,19E-02	1,26E-01	21	18	19	20	14	19	86	135	97	46	30	34	18	49	0,12	1,53	-1,41	ASPH	-	-	uc003xul.3:62538831:62602247:-;uc011lei.2:62538831:62602247:-;uc011lej.2:62538831:62602247:-;uc011leh.2:62538831:62602247:-;uc003xum.3:62538831:62626930:-;uc003xun.3:62538831:62626930:-;uc011lek.2:62538831:62626930:-;uc011leg.2:62415917:62602247:-;uc003xuj.3:62415917:62626930:-;uc003xuo.2:62475302:62626930:-
chr16:71669862-71670201:mpeak_30052|chr16_71660055_71674292_MARVELD3_NM_+|	95	-1,41	0,4	3,1	1,72E-03	3,85E-02	44	40	53	136	124	144	106	84	95	141	96	80	48	128	-1,55	-0,15	-1,41	MARVELD3	chr16:71669918:+;chr16:71670058:+;chr16:71670108:+	chr16_71636013_+;chr16_71636203_+	uc002fau.4:71660132:71674930:+;uc010cge.4:71660132:71674307:+
chr12:101790318-101790367:mpeak_18627|chr12_101789448_101801598_ARL1_NM_-|	305	-1,41	0,6	2,3	2,29E-02	1,84E-01	2	5	6	9	6	12	660	720	671	453	593	524	1	2	-1,06	0,38	-1,45	ARL1	-	chr12_101396504_-	uc001tib.3:101789417:101801423:-;uc010svn.2:101789417:101801423:-
chr3:33125047-33125111:mpeak_51291|chr3_33038836_33138694_GLB1_NM_-|	599	-1,42	0,6	2,4	1,69E-02	1,53E-01	63	55	125	138	182	127	965	1102	1797	736	711	1184	6	17	-0,88	0,55	-1,43	GLB1	chr3:33125059:-	chr3_33083568_-;chr3_33083601_-	uc003cfi.1:33038536:33138577:-;uc003cfj.1:33038536:33138577:-;uc011axk.1:33038536:33138577:-
chr6:105770130-105770193:mpeak_65483|chr6_105726313_105850999_PREP_NM_-|	147	-1,46	0,7	2,2	2,90E-02	2,10E-01	3	18	12	26	34	30	202	311	317	216	207	384	4	11	-1,42	0,04	-1,45	PREP	chr6:105770134:-	chr6_105322260_-	uc003prc.3:105726018:105850766:-
chr11:244677-244768:mpeak_11523|chr11_236807_252504_PSMD13_NM_+|	586	-1,47	0,7	2,3	2,36E-02	1,86E-01	9	4	3	20	7	11	1169	1191	1377	968	1058	1219	0	1	-1,27	0,20	-1,47	PSMD13	chr11:244762:+	-	uc001lol.2:237049:252600:+;uc001loo.2:237049:252600:+;uc001lon.2:239062:252600:+
chr2:219103860-219103923:mpeak_45189|chr2_219081816_219118613_ARPC2_NM_+|	1083	-1,49	0,6	2,4	1,79E-02	1,59E-01	7	8	4	8	7	17	2256	2787	2600	1520	1996	1791	0	1	-0,83	0,53	-1,36	ARPC2	chr2:219103920:+	chr2_218239196_+	uc002vhf.3:219103460:219118638:+;uc002vhd.4:219082193:219118638:+;uc002vhe.3:219082193:219118638:+
chr15:72974612-72974667:mpeak_26571|chr15_72968728_72978490_HIGD2B_NR_-|	31	-1,51	0,8	2,0	4,98E-02	2,89E-01	14	47	26	32	29	40	49	29	49	12	13	27	68	196	-0,23	1,30	-1,53	HIGD2B	-	-	-
chr18:33696378-33696473:mpeak_35993|chr18_33689708_33709357_SLC39A6_NM_-|	782	-1,55	0,7	2,1	3,33E-02	2,29E-01	7	43	27	32	45	29	1929	2754	1578	901	1337	706	1	4	-0,46	1,09	-1,55	SLC39A6	-	chr18_36116449_-	uc010dmy.3:33689555:33706970:-;uc002kzj.2:33691009:33704627:-
chr19:36815807-36815969:mpeak_38433|chr19_36804224_36822620_LINC00665_NR_-|	39	-1,56	0,8	2,0	4,47E-02	2,73E-01	85	58	64	89	78	67	6	8	9	0	4	3	940	2058	-0,18	1,54	-1,72	LINC00665	chr19:36815809:-	chr19_36324910_-;chr19_36324946_-;chr19_36324959_-;chr19_36325017_-	-
chr12:113382641-113382808:mpeak_19166|chr12_113376237_113407766_OAS3_NM_+|	184	-1,57	0,6	2,8	4,52E-03	7,02E-02	21	43	36	43	114	68	381	357	327	282	261	271	9	28	-1,18	0,39	-1,56	OAS3	chr12:113382698:+;chr12:113382793:+	chr12_112944893_+;chr12_112944983_+	uc001tug.3:113376335:113407778:+
chr6:1690169-1690221:mpeak_62973|chr6_1624466_2245868_GMDS_NM_-|	282	-1,59	0,7	2,2	2,55E-02	1,96E-01	0	6	6	16	6	17	463	538	650	520	606	559	1	2	-1,69	-0,03	-1,66	GMDS	chr6:1690169:-	chr6_1689937_-	uc021ykn.1:1624403:2176177:-;uc003mtq.3:1624403:2245656:-
chr6:144184225-144184428:mpeak_66293|chr6_144164507_144184553_LTV1_NM_+|	30	-1,60	0,8	2,1	3,68E-02	2,44E-01	19	10	11	36	44	31	24	58	24	39	41	19	37	112	-1,49	0,10	-1,59	LTV1	-	chr6_143863161_+;chr6_143863202_+	uc010khj.3:144181662:144258856:+;uc003qjs.3:144164614:144184664:+
chr18:9367811-9367923:mpeak_35468|chr18_9334764_9399343_TWSG1_NM_+|	84	-1,64	0,7	2,4	1,49E-02	1,44E-01	6	5	7	11	6	8	244	234	205	109	115	62	3	9	-0,46	1,25	-1,71	TWSG1	chr18:9367891:+	chr18_9367891_+	uc002knz.3:9337227:9399525:+
chr14:51390444-51390624:mpeak_22712|chr14_51372274_51411248_PYGL_NM_-|	79	-1,66	0,6	2,6	1,04E-02	1,18E-01	8	4	5	14	13	12	139	166	214	99	113	157	3	10	-1,17	0,49	-1,66	PYGL	chr14:51390463:-;chr14:51390530:-;chr14:51390613:-	chr14_50923746_-;chr14_50923813_-	uc010anz.1:51382542:51390755:-;uc001wyu.3:51372109:51411121:-;uc010tqq.2:51372109:51411121:-
chr5:10284683-10284744:mpeak_58923|chr5_10280744_10308168_CMBL_NM_-|	122	-1,66	0,8	2,0	4,92E-02	2,86E-01	1	0	7	3	10	9	290	263	267	214	247	150	2	4	-1,41	0,43	-1,84	CMBL	chr5:10284687:-	chr5_10284576_-	uc003jes.3:10280564:10290874:-
chr20:47746507-47746611:mpeak_47414|chr20_47731430_47804904_STAU1_NM_-|	592	-1,68	0,7	2,3	1,88E-02	1,64E-01	1	4	3	9	7	6	1099	1380	1350	916	1159	1172	0	1	-1,51	0,24	-1,75	STAU1	chr20:47746507:-;chr20:47746560:-	chr20_49129971_-;chr20_49130024_-	uc002xua.3:47731414:47770570:-;uc002xub.3:47731414:47770570:-;uc002xud.3:47731414:47782738:-;uc002xuc.3:47731414:47770570:-;uc002xue.3:47731414:47770570:-;uc002xuf.3:47731414:47770570:-;uc002xug.3:47731414:47782738:-
chr10:117825075-117825137:mpeak_11007|chr10_117824055_118033126_GFRA1_NM_-|	768	-1,73	0,7	2,4	1,81E-02	1,60E-01	3	0	8	12	8	11	2168	1191	1984	1416	1101	1308	0	1	-1,45	0,48	-1,93	GFRA1	chr10:117825075:-	-	uc001lci.3:117823908:118031541:-;uc001lcj.3:117823908:118031541:-;uc009xyr.3:117823908:118031541:-
chr6:83892495-83892554:mpeak_65179|chr6_83879042_83903655_PGM3_NM_-|	57	-1,76	0,9	2,0	4,42E-02	2,72E-01	0	10	3	3	10	10	110	157	147	68	98	74	5	10	-0,82	0,79	-1,61	PGM3	chr6:83892497:-	-	uc003pju.2:83878952:83900731:-;uc003pjw.3:83879016:83898478:-;uc011dyz.2:83878952:83900987:-;uc021zcd.1:83876105:83900731:-
chrX:41200724-41200860:mpeak_77698|chrX_41192560_41223526_DDX3X_NR_+mpeak_77698|chrX_41192560_41206892_DDX3X_NM_+||	280	-1,77	0,8	2,2	2,84E-02	2,08E-01	1	0	5	4	12	5	591	727	487	493	566	473	1	1	-1,77	0,24	-2,01	DDX3X	-	chrX_41341520_+	uc010nhf.1:41193505:41203785:+;uc004dfe.3:41193505:41206972:+;uc011mks.2:41193505:41206972:+;uc004dff.3:41193505:41206972:+;uc011mkq.2:41193505:41206972:+;uc011mkr.2:41193505:41206972:+
chr22:19455294-19455499:mpeak_49195|chr22_19438267_19466738_UFD1L_NM_-|	363	-1,78	0,9	2,0	4,78E-02	2,81E-01	1	0	4	5	11	1	756	794	898	568	642	669	0	1	-1,69	0,38	-2,07	UFD1L	chr22:19455359:-	chr22_19467799_-;chr22_19467839_-	uc010grq.2:19452694:19462618:-;uc002zpm.2:19438192:19466608:-;uc002zpo.2:19438262:19466608:-;uc011agy.1:19442172:19466608:-;uc002zpp.2:19442172:19462618:-
chr5:145522337-145522392:mpeak_61969|chr5_145493874_145562294_LARS_NM_-|	159	-1,80	0,9	2,0	4,86E-02	2,84E-01	6	0	1	5	8	5	249	535	285	318	302	189	1	2	-1,34	0,40	-1,74	LARS	chr5:145522338:-	chr5_146142776_-	uc003lnx.1:145493668:145562056:-;uc011dbq.1:145493668:145562056:-;uc011dbr.1:145493668:145552300:-;uc011dbs.1:145493668:145562056:-
chr1:46067990-46068046:mpeak_2167|chr1_46049659_46083732_NASP_NM_+|	167	-1,84	0,8	2,4	1,59E-02	1,49E-01	7	11	0	16	16	23	300	327	363	254	339	349	3	6	-1,61	0,07	-1,68	NASP	-	chr1_45602319_+	uc010olq.2:46049818:46079851:+;uc021omz.1:46056902:46081143:+;uc001coi.2:46049818:46083813:+;uc001coj.2:46049818:46083813:+;uc010olr.2:46049818:46083813:+
chr6:151256777-151256886:mpeak_66470|chr6_151186814_151422661_MTHFD1L_NM_+|	110	-1,84	0,8	2,2	2,53E-02	1,95E-01	6	3	4	5	25	24	122	225	191	270	168	278	2	8	-2,20	-0,41	-1,79	MTHFD1L	-	-	uc003qob.3:151186958:151413692:+;uc021zgs.1:151186958:151413692:+;uc021zgt.1:151187494:151413692:+;uc003qoc.3:151197157:151413692:+
chr17:26961323-26961381:mpeak_32200|chr17_26942264_26972177_KIAA0100_NM_-|	299	-1,84	0,9	2,1	3,30E-02	2,29E-01	0	1	4	11	8	2	552	668	763	468	526	581	0	1	-1,87	0,33	-2,20	KIAA0100	chr17:26961330:-	chr17_28634313_-	uc002hbu.3:26942081:26972074:-
chr2:70488536-70488593:mpeak_41835|chr2_70485230_70503865_PCYOX1_NM_+|	409	-1,88	0,8	2,3	2,41E-02	1,89E-01	6	4	9	22	9	2	1147	917	1351	447	517	475	1	2	-0,80	1,25	-2,04	PCYOX1	chr2:70488591:+	chr2_70261457_+	uc010fdo.3:70486610:70504524:+;uc002sgn.4:70485296:70504524:+;uc010yqu.2:70485296:70504524:+
chr5:463674-464102:mpeak_58731|chr5_443333_466841_EXOC3_NM_+|	126	-1,88	0,7	2,6	9,66E-03	1,12E-01	0	5	4	9	16	10	228	191	276	264	212	294	2	4,62	-2,04	-0,15	-1,90	EXOC3	chr5:463733:+;chr5:463817:+;chr5:463877:+;chr5:463969:+;chr5:464109:+	chr5_463616_+;chr5_463686_+;chr5_463870_+;chr5_463994_+	uc003jba.3:446320:467013:+
chr1:114443763-114443978:mpeak_3835|chr1_114438114_114447746_AP4B1_NM_-|	66	-1,91	0,9	2,1	4,00E-02	2,55E-01	6	0	0	16	11	10	71	67	122	154	156	182	7	8	-2,68	-0,92	-1,75	AP4B1	chr1:114443774:-	-	uc010owq.2:114442451:114447339:-;uc001eeb.3:114437686:114447339:-;uc001eec.3:114437686:114447339:-;uc010owp.2:114437686:114445300:-;uc001eed.3:114437686:114447339:-
chr19:47279996-47280197:mpeak_39077|chr19_47279004_47291842_SLC1A5_NM_-|	4466	-1,93	0,8	2,4	1,85E-02	1,62E-01	5	1	3	11	9	8	7172	8007	14266	7274	5364	11478	0	0	-1,68	0,29	-1,97	SLC1A5	chr19:47280036:-	chr19_46776737_-;chr19_46776888_-	uc010xyh.2:47278766:47287854:-;uc002pfq.3:47278766:47287854:-;uc002pfr.3:47278766:47285779:-;uc002pfs.3:47278766:47291222:-
chr17:55339511-55339561:mpeak_33674|chr17_55333930_55756909_MSI2_NM_+|	28	-1,93	1,0	2,0	4,54E-02	2,75E-01	3	13	5	14	18	33	22	74	40	26	26	60	15	57	-1,60	0,29	-1,90	MSI2	-	-	uc010wnm.1:55334462:55754389:+;uc002iuz.1:55334103:55754389:+;uc002iva.3:55334408:55709192:+
chr3:196745781-196745877:mpeak_55273|chr3_196730322_196756687_MFI2_NM_-|	35	-1,94	0,8	2,3	2,17E-02	1,78E-01	0	5	8	26	12	15	55	47	78	58	44	73	11	30	-2,03	0,03	-2,06	MFI2	chr3:196745781:-;chr3:196745824:-	chr3_197018912_-;chr3_197018954_-	uc003fxk.4:196730242:196756573:-
chr8:93976936-93977017:mpeak_72448|chr8_93898963_93978372_TRIQK_NM_-|	65	-1,96	1,0	2,1	3,97E-02	2,55E-01	2	4	5	5	5	22	147	181	87	85	153	77	3	10	-1,55	0,40	-1,95	TRIQK	chr8:93976962:-	chr8_92964731_-	-
chr1:10205187-10205256:mpeak_443|chr1_10093040_10239952_UBE4B_NM_+|	75	-1,97	0,9	2,1	3,57E-02	2,40E-01	0	0	4	3	6	6	142	160	177	164	96	141	2	4	-2,02	0,26	-2,28	UBE4B	chr1:10205242:+	chr1_10145180_+	uc001aqs.4:10093728:10240014:+;uc001aqr.4:10093728:10240014:+;uc021ogc.1:10093728:10240014:+;uc010oaj.2:10186932:10240014:+
chr5:112220975-112221069:mpeak_60820|chr5_112196884_112227299_SRP19_NM_+|	22	-2,00	0,9	2,2	2,73E-02	2,04E-01	13	10	4	41	23	52	20	28	12	15	36	13	46	180	-2,08	-0,09	-1,99	SRP19	-	chr5_112885352_+	uc011cvu.2:112197073:112227304:+
chr17:48762770-48762905:mpeak_33525|chr17_48712217_48768452_ABCC3_NM_+|	292	-2,00	0,7	2,8	5,11E-03	7,58E-02	3	13	6	9	22	29	414	871	692	457	499	484	1	4	-1,47	0,46	-1,92	ABCC3	chr17:48762825:+;chr17:48762906:+	chr17_50685463_+	uc002isl.3:48712297:48768561:+;uc002isn.3:48757191:48768561:+
chr17:17064888-17064958:mpeak_31819|chr17_16946073_17088136_MPRIP_NM_+|	96	-2,00	0,9	2,1	3,19E-02	2,24E-01	3	1	0	9	11	5	158	164	118	274	222	189	2	4	-2,44	-0,64	-1,80	MPRIP	chr17:17064945:+;chr17:17064993:+	chr17_17161631_+	uc002gqw.2:17039649:17088208:+;uc002gqu.2:16946162:17083953:+;uc002gqv.2:16946162:17088208:+
chr7:107558365-107558514:mpeak_69535|chr7_107531551_107559638_DLD_NM_+|	206	-2,01	1,0	2,0	4,41E-02	2,72E-01	5	5	0	16	3	11	379	620	324	309	511	287	1	3	-1,64	0,26	-1,89	DLD	-	chr7_107918016_+	uc003vet.3:107531695:107559704:+;uc011kmg.2:107531695:107559704:+;uc011kmh.2:107531695:107559704:+;uc011kmi.2:107543952:107559704:+
chr8:145676504-145676562:mpeak_73842|chr8_145676153_145691031_CYHR1_NM_-|	36	-2,02	0,9	2,1	3,31E-02	2,29E-01	8	0	15	9	30	24	55	69	81	34	48	52	17	48	-1,46	0,62	-2,08	CYHR1	chr8:145676508:-;chr8:145676534:-	chr8_144451127_-;chr8_144451159_-	uc003zcv.2:145675761:145690284:-
chr7:138745079-138745294:mpeak_70118|chr7_138732599_138794465_ZC3HAV1_NM_-|	388	-2,02	0,5	4,0	5,81E-05	7,05E-03	145	131	139	182	226	316	620	1149	691	395	405	259	17	68	-0,80	1,22	-2,02	ZC3HAV1	chr7:138745086:-	chr7_139060342_-;chr7_139060388_-	uc003vun.3:138732339:138794077:-
chr6:33677107-33677278:mpeak_64178|chr6_33665527_33679528_UQCC2_NM_-|	125	-2,04	0,8	2,5	1,21E-02	1,28E-01	0	8	4	3	9	16	255	292	327	166	200	217	2	4,82	-1,33	0,58	-1,92	UQCC2	chr6:33677162:-;chr6:33677246:-	chr6_33709366_-;chr6_33709470_-	uc003ofa.2:33665429:33679463:-
chr6:107363128-107363189:mpeak_65518|chr6_107349375_107372260_C6orf203_NM_+|	46	-2,06	1,0	2,2	3,06E-02	2,17E-01	2	0	12	15	33	21	89	83	58	97	90	51	10	29	-2,25	-0,05	-2,19	C6orf203	chr6:107363187:+	chr6_107041981_+	uc011eaj.2:107351308:107372440:+;uc003prq.3:107360964:107372440:+;uc010kde.3:107360964:107372440:+
chr1:84552602-84552663:mpeak_2900|chr1_84543657_84700862_PRKACB_NM_+|	23	-2,07	0,8	2,7	6,23E-03	8,65E-02	7	5	8	5	5	11	66	64	56	15	20	13	11	44	-0,09	1,96	-2,05	PRKACB	-	chr1_84086974_+	uc001dji.3:84544008:84670173:+;uc001djj.3:84544008:84700988:+
chr14:73876640-73876767:mpeak_23609|chr14_73744001_73925286_NUMB_NM_-|	87	-2,07	1,0	2,1	3,99E-02	2,55E-01	7	0	0	23	7	13	86	165	130	235	178	194	5	7	-2,63	-0,67	-1,96	NUMB	-	-	-
chr2:224762734-224762834:mpeak_45407|chr2_224743447_224810104_WDFY1_NM_-|	70	-2,08	0,9	2,2	2,46E-02	1,92E-01	6	0	0	4	4	7	160	155	153	132	129	91	4	4	-1,43	0,40	-1,83	WDFY1	chr2:224762781:-	chr2_223898067_-	uc002vnq.3:224743387:224810001:-
chr20:43126064-43126204:mpeak_47096|chr20_43124996_43150726_SERINC3_NM_-|	70	-2,08	1,0	2,0	4,57E-02	2,75E-01	78	216	143	145	126	115	6	3	11	0	1	3	2286	7276	0,18	2,44	-2,26	SERINC3	chr20:43126082:-;chr20:43126107:-;chr20:43126155:-	chr20_44497394_-;chr20_44497445_-;chr20_44497537_-	-
chr14:24032293-24032359:mpeak_22113|chr14_24029059_24037045_AP1G2_NM_-|	56	-2,09	1,0	2,2	2,83E-02	2,08E-01	0	4	2	4	4	9	106	116	154	88	57	130	2	6	-1,57	0,45	-2,02	AP1G2	chr14:24032308:-	chr14_23563100_-	uc001wkn.2:24028957:24033013:-;uc001wkk.3:24028957:24035570:-;uc001wkl.2:24028957:24036523:-
chr2:220474794-220474850:mpeak_45318|chr2_220462572_220480765_STK11IP_NM_+|	188	-2,10	0,8	2,7	7,80E-03	9,92E-02	1	1	4	12	8	11	336	327	410	293	332	516	1	3	-2,37	-0,09	-2,28	STK11IP	-	chr2_219610125_+	uc002vml.3:220462638:220480915:+
chr6:99993006-99993112:mpeak_65451|chr6_99991485_100016690_CCNC_NM_-|	110	-2,13	0,9	2,4	1,64E-02	1,51E-01	9	3	1	12	4	13	289	328	203	116	207	140	2	6	-1,21	0,83	-2,04	CCNC	-	-	uc003pqd.3:99991430:100009281:-;uc003pqe.3:99991430:100016403:-;uc010kcs.3:99991430:100016403:-;uc011eah.2:99991430:100009281:-
chr14:102376683-102376737:mpeak_24496|chr14_102228134_102391477_PPP2R5C_NM_+|	63	-2,15	1,0	2,2	2,50E-02	1,94E-01	0	6	0	4	13	5	112	140	120	130	120	111	5	6	-1,81	0,04	-1,86	PPP2R5C	chr14:102376734:+	chr14_101910395_+	uc001ykn.3:102276279:102378834:+;uc010txr.2:102228230:102391609:+;uc001ykk.3:102228230:102391609:+;uc001yko.3:102276279:102391609:+;uc001ykp.3:102276279:102391609:+
chr4:102265026-102265159:mpeak_57296|chr4_101947218_102268628_PPP3CA_NM_-|	5614	-2,16	0,9	2,3	2,14E-02	1,76E-01	0	10	1	8	19	5	12091	13980	12996	8262	10935	9061	0	0	-1,54	0,47	-2,01	PPP3CA	chr4:102265025:-	chr4_101343870_-	uc011cen.1:101947021:102267953:-;uc003hvu.2:101947021:102267953:-;uc010ilj.2:101947021:102267953:-;uc003hvs.2:101947021:102267953:-;uc010ilk.2:101947021:102267953:-
chr6:131907864-131908030:mpeak_65976|chr6_131895435_131949379_MED23_NM_-|	58	-2,16	1,0	2,3	2,39E-02	1,88E-01	86	128	55	109	205	75	3	9	14	4	3	3	1008	4198	-0,53	1,53	-2,06	MED23	chr6:131907861:-;chr6:131907891:-;chr6:131907917:-;chr6:131907975:-	chr6_131586733_-;chr6_131586785_-;chr6_131586836_-	uc003qcq.4:131895432:131949189:-;uc031spq.1:131895432:131949189:-
chr15:52441478-52441531:mpeak_25804|chr15_52414965_52483565_GNB5_NM_-|	199	-2,16	0,8	2,6	9,33E-03	1,10E-01	3	4	0	4	8	13	408	322	487	358	407	379	1	2	-1,75	0,09	-1,84	GNB5	chr15:52441475:-	-	uc002abr.1:52414953:52472076:-;uc002abs.1:52414953:52472076:-;uc002abt.1:52414953:52476873:-
chr12:54665642-54665769:mpeak_17228|chr12_54635689_54673915_CBX5_NM_-|	920	-2,19	1,0	2,2	2,53E-02	1,95E-01	0	5	0	5	8	2	2592	1766	1859	1422	1880	1501	0	0	-1,58	0,37	-1,95	CBX5	chr12:54665638:-;chr12:54665713:-	chr12_54271808_-	-
chr19:3980661-3980738:mpeak_36828|chr19_3976745_3985461_EEF2_NM_-|	10695	-2,21	1,1	2,1	3,92E-02	2,52E-01	1	0	5	11	14	1	19365	26100	28692	17992	13622	22541	0	0	-2,01	0,45	-2,46	EEF2	chr19:3980637:-;chr19:3980685:-	chr19_3980642_-;chr19_3980690_-	uc002lze.3:3976551:3985378:-
chr9:4684996-4685166:mpeak_74006|chr9_4679552_4706010_CDC37L1_NM_+|	27	-2,24	1,0	2,2	2,72E-02	2,04E-01	1	4	1	12	8	8	22	68	48	50	63	42	4	18	-2,30	-0,17	-2,13	CDC37L1	-	chr9_4685097_+	uc003zio.3:4679767:4706112:+
chr2:24163468-24163525:mpeak_40461|chr2_24163375_24222541_UBXN2A_NM_+|	29	-2,24	0,8	2,8	5,80E-03	8,33E-02	15	1	4	30	15	18	54	62	48	31	38	36	13	60	-1,60	0,64	-2,25	UBXN2A	-	-	-
chr11:47247644-47247704:mpeak_12663|chr11_47236492_47260350_DDB2_NM_+|	155	-2,27	1,0	2,4	1,73E-02	1,56E-01	6	0	0	7	4	11	242	299	412	242	309	332	2	3	-1,94	0,11	-2,05	DDB2	chr11:47247700:+	chr11_47226146_+	uc001neb.2:47236687:47260400:+;uc009yli.1:47236687:47260400:+;uc001nee.2:47236687:47260400:+;uc001nef.2:47237801:47260400:+
chr9:115392065-115392137:mpeak_75871|chr9_115249247_115421542_KIAA1958_NM_+|	15	-2,28	1,2	2,0	4,98E-02	2,89E-01	2	4	0	8	5	7	21	16	49	14	27	25	11	30	-1,70	0,40	-2,11	KIAA1958	chr9:115392117:+	chr9_112629835_+	uc004bgf.1:115336360:115422349:+;uc011lwx.1:115336360:115422349:+
chr2:74083179-74083244:mpeak_41977|chr2_74056042_74089329_STAMBP_NM_+|	108	-2,29	1,0	2,2	2,49E-02	1,93E-01	1	0	6	5	8	23	133	330	213	207	152	220	2	6	-2,23	0,22	-2,45	STAMBP	chr2:74083236:+	chr2_73856121_+	uc002sjs.3:74057983:74089386:+;uc002sju.3:74057983:74089386:+;uc002sjv.3:74057983:74089386:+
chr1:117913111-117913168:mpeak_4087|chr1_117910084_118065446_MAN1A2_NM_+|	45	-2,30	1,1	2,1	3,91E-02	2,52E-01	0	0	4	3	3	11	104	127	82	47	106	57	4	8	-1,96	0,58	-2,54	MAN1A2	chr1:117913171:+	chr1_117370539_+	uc009whg.1:117911082:118042176:+;uc001ehd.1:117910805:118065579:+
chr6:13618286-13618376:mpeak_63285|chr6_13615558_13620985_NOL7_NM_+|	155	-2,30	1,0	2,3	2,38E-02	1,88E-01	0	4	0	8	3	5	266	365	256	297	326	334	1	2	-2,16	-0,11	-2,05	NOL7	chr6:13618351:+	chr6_13618059_+	uc003naz.3:13615590:13621059:+
chr13:98653444-98653592:mpeak_21513|chr13_98605928_98673989_IPO5_NM_+|	196	-2,31	0,9	2,5	1,19E-02	1,26E-01	1	0	3	3	8	3	421	655	391	301	275	286	0	2	-1,76	0,77	-2,52	IPO5	chr13:98653496:+;chr13:98653595:+	chr13_98001239_+;chr13_98001336_+	uc001vne.3:98622034:98674076:+;uc001vnf.1:98628950:98664595:+;uc010tik.1:98628950:98664595:+;uc010til.1:98637683:98664595:+
chr9:132259217-132259313:mpeak_76602|chr9_132250938_132275697_LINC00963_NR_+|	8	-2,32	1,2	2,0	4,41E-02	2,72E-01	6	6	4	4	25	15	5	9	12	7	3	5	61	285	-1,49	0,73	-2,22	LINC00963	-	chr9_129497034_+;chr9_129497067_+	-
chr20:55092149-55092229:mpeak_47699|chr20_55043640_55093142_RTFDC1_NM_+|	543	-2,34	0,7	3,3	8,14E-04	2,72E-02	12	1	6	24	14	35	1071	974	1563	777	976	1062	1	3	-1,98	0,36	-2,34	RTFDC1	-	chr20_56517121_+;chr20_56517191_+	uc002xxt.2:55043753:55093321:+;uc010zzf.1:55043753:55093321:+;uc002xxu.2:55043753:55093321:+
chr19:50718855-50718921:mpeak_39436|chr19_50706884_50812896_MYH14_NM_+|	72	-2,36	0,8	3,1	1,72E-03	3,85E-02	2	9	2	7	15	7	182	159	213	105	82	75	2	11	-1,14	1,08	-2,22	MYH14	-	-	uc010enu.1:50713622:50813047:+;uc002prq.1:50713622:50813047:+;uc002prr.1:50713622:50813047:+
chr1:1254045-1254247:mpeak_74|chr1_1247304_1260067_CPSF3L_NM_-|	77	-2,36	0,4	5,4	7,79E-08	5,92E-05	35	33	43	126	106	117	75	94	120	59	60	58	38	197	-1,66	0,71	-2,37	CPSF3L	chr1:1254049:-;chr1:1254075:-;chr1:1254117:-;chr1:1254168:-;chr1:1254196:-	chr1_1318681_-;chr1_1318738_-;chr1_1318790_-;chr1_1318814_-;chr1_1318863_-	uc001aef.2:1247238:1257333:-;uc010nyj.2:1247238:1256414:-;uc001aee.2:1247238:1259988:-;uc001aeh.2:1247238:1259988:-;uc001aei.2:1247238:1259988:-;uc009vjz.2:1247238:1259988:-;uc001aeg.2:1247238:1254732:-
chr5:179313952-179314090:mpeak_62861|chr5_179291128_179334856_TBC1D9B_NM_-|	222	-2,37	0,8	3,2	1,59E-03	3,78E-02	2	5	2	5	18	15	392	471	544	388	311	508	1	3	-2,02	0,22	-2,24	TBC1D9B	chr5:179313950:-;chr5:179313975:-;chr5:179314044:-	chr5_179886977_-;chr5_179887044_-	uc003mlh.3:179290447:179334821:-;uc003mli.3:179290447:179334821:-;uc003mlj.3:179290447:179334821:-
chr2:131123200-131123254:mpeak_43321|chr2_131113579_131130729_PTPN18_NM_+|	51	-2,38	1,1	2,2	2,76E-02	2,06E-01	0	5	0	8	2	7	98	125	118	73	114	63	4	7	-1,71	0,44	-2,16	PTPN18	chr2:131123256:+	chr2_130365681_+	uc002trc.3:131113680:131130797:+;uc002trb.3:131113680:131130797:+
chr8:62574148-62574297:mpeak_71933|chr8_62416068_62627199_ASPH_NM_-|	45	-2,39	0,7	3,2	1,29E-03	3,41E-02	8	28	6	20	26	27	86	135	97	46	30	34	13	67	-0,79	1,53	-2,32	ASPH	chr8:62574232:-	chr8_61661584_-;chr8_61661645_-;chr8_61661687_-	uc003xul.3:62538831:62602247:-;uc011lei.2:62538831:62602247:-;uc011lej.2:62538831:62602247:-;uc011leh.2:62538831:62602247:-;uc003xum.3:62538831:62626930:-;uc003xun.3:62538831:62626930:-;uc011lek.2:62538831:62626930:-;uc011leg.2:62415917:62602247:-;uc003xuj.3:62415917:62626930:-;uc003xuo.2:62475302:62626930:-
chr7:44647246-44647302:mpeak_68087|chr7_44646120_44747477_OGDH_NM_+|	634	-2,40	1,0	2,3	2,11E-02	1,74E-01	0	5	0	7	2	10	1042	1219	1821	1170	981	1351	0	1	-1,88	0,22	-2,10	OGDH	chr7:44647297:+	chr7_44607697_+	-
chr20:30129483-30129560:mpeak_46583|chr20_30102212_30156922_HM13_NM_+|	694	-2,41	0,9	2,8	5,51E-03	8,08E-02	0	9	0	5	12	13	1468	1364	1803	992	1364	1296	1	1	-1,77	0,34	-2,11	HM13	chr20:30129536:+;chr20:30129562:+	chr20_31541745_+	uc002wwc.3:30102354:30157022:+;uc002wwd.3:30102354:30156031:+;uc002wwe.3:30102354:30157022:+
chr8:80870217-80870272:mpeak_72207|chr8_80831383_80942506_MRPS28_NM_-|	38	-2,42	1,2	2,1	3,80E-02	2,49E-01	0	4	0	3	4	5	113	69	68	93	41	60	5	6	-1,70	0,37	-2,07	MRPS28	chr8:80870219:-	chr8_79957985_-	uc003ybp.3:80831214:80942483:-
chr6:75967972-75968022:mpeak_65041|chr6_75966011_75994632_TMEM30A_NM_-|	177	-2,42	1,0	2,5	1,27E-02	1,32E-01	0	3	1	11	1	7	343	404	387	345	348	273	1	2	-2,27	0,23	-2,50	TMEM30A	chr6:75967970:-	chr6_75258256_-	uc003phw.2:75965817:75994354:-;uc003phx.2:75965817:75994354:-
chr16:1586594-1586675:mpeak_27592|chr16_1561151_1662109_IFT140_NM_-|	30	-2,45	1,2	2,1	3,42E-02	2,33E-01	2	1	0	8	4	10	43	25	71	68	51	70	4	12	-2,64	-0,43	-2,21	IFT140	chr16:1586604:-	-	uc002clz.3:1560944:1636238:-;uc002cmb.3:1560944:1657267:-
chr9:133457050-133457115:mpeak_76679|chr9_133454959_133512400_FUBP3_NM_+|	187	-2,46	0,9	2,7	6,05E-03	8,45E-02	0	5	0	8	8	6	304	381	422	359	396	349	1	2	-2,17	0,00	-2,17	FUBP3	chr9:133457108:+	chr9_130581739_+	uc004bzr.1:133455067:133512409:+
chr15:50521238-50521303:mpeak_25620|chr15_50474392_50528116_SLC27A2_NM_+|	88	-2,46	1,2	2,0	4,46E-02	2,73E-01	3	4	1	4	0	24	186	228	211	136	136	125	1	11	-1,70	0,65	-2,35	SLC27A2	chr15:50521301:+	chr15_50229102_+	uc001zxw.3:50474624:50528293:+;uc010bes.3:50474624:50528293:+;uc001zxx.3:50494700:50528293:+
chr8:95522207-95522319:mpeak_72506|chr8_95501088_95565746_KIAA1429_NM_-|	106	-2,53	1,0	2,4	1,49E-02	1,44E-01	0	5	0	9	10	9	118	302	143	292	201	183	3	4	-2,53	-0,26	-2,26	KIAA1429	chr8:95522217:-;chr8:95522265:-	chr8_94509989_-;chr8_94510041_-	uc003ygo.2:95500933:95565675:-
chr1:114438877-114438935:mpeak_3829|chr1_114438114_114447746_AP4B1_NM_-|	68	-2,56	0,9	2,7	6,73E-03	9,05E-02	5	0	1	27	9	21	71	67	122	154	156	182	3	12	-3,41	-0,92	-2,48	AP4B1	-	-	uc001eee.1:114438322:114438970:-;uc001eea.1:114438856:114443021:-;uc001eeb.3:114437686:114447339:-;uc001eec.3:114437686:114447339:-;uc010owp.2:114437686:114445300:-;uc001eed.3:114437686:114447339:-
chr1:21501605-21501662:mpeak_908|chr1_21133993_21503381_EIF4G3_NM_-|	63	-2,57	0,8	3,2	1,18E-03	3,30E-02	16	10	15	32	21	39	135	245	74	51	84	34	9	55	-1,16	1,43	-2,58	EIF4G3	chr1:21501609:-	chr1_21175100_-	-
chr17:38248772-38248904:mpeak_32807|chr17_38218445_38249272_THRA_NM_+|	31	-2,58	1,0	2,5	1,32E-02	1,35E-01	12	23	28	64	62	86	22	24	16	8	25	1	101	607	-1,76	0,83	-2,59	THRA	chr17:38248825:+;chr17:38248901:+	chr17_40092570_+;chr17_40092647_+	uc021twy.1:38230741:38249635:+;uc002htx.3:38230741:38249635:+;uc002htw.3:38230741:38249635:+
chr1:154961430-154961502:mpeak_5124|chr1_154955769_154965188_FLAD1_NM_+|	77	-2,58	0,6	4,6	5,01E-06	1,14E-03	30	25	12	122	121	171	70	83	60	74	88	63	31	184	-2,63	-0,08	-2,54	FLAD1	chr1:154961488:+;chr1:154961541:+	chr1_154989011_+	uc001fgh.1:154961009:154965138:+;uc001fgd.2:154956170:154962740:+;uc001fge.2:154956461:154965513:+;uc001fgg.2:154956461:154965266:+;uc001fgf.2:154956170:154965513:+
chr2:65301489-65301626:mpeak_41652|chr2_65283494_65310772_CEP68_NM_+|	18	-2,61	1,1	2,4	1,47E-02	1,44E-01	2	0	3	4	9	8	51	40	24	34	27	13	7	29	-2,04	0,65	-2,69	CEP68	chr2:65301624:+	chr2_65074488_+	uc010yqb.1:65296578:65309675:+;uc002sdl.4:65296578:65309839:+;uc002sdk.4:65296578:65309839:+;uc010yqc.2:65296578:65309839:+
chr19:54683365-54683433:mpeak_39703|chr19_54678125_54693733_MBOAT7_NM_-|	241	-2,61	1,1	2,3	2,21E-02	1,79E-01	5	3	0	0	4	18	604	547	634	377	370	335	1	3	-1,64	0,72	-2,36	MBOAT7	chr19:54683381:-	chr19_54179666_-	uc010yem.2:54677737:54692222:-;uc002qdq.3:54677737:54692362:-;uc002qdr.3:54677737:54692362:-;uc002qds.3:54677737:54692184:-;uc010yen.2:54677737:54692184:-;uc002qdt.4:54682477:54692362:-
chr19:3782423-3782492:mpeak_36821|chr19_3778420_3801810_MATK_NM_-|	26	-2,61	1,0	2,5	1,11E-02	1,22E-01	0	6	1	11	14	5	48	43	63	53	36	31	7	25	-2,09	0,36	-2,46	MATK	chr19:3782439:-;chr19:3782475:-	chr19_3782444_-	uc002lyt.3:3778180:3785133:-;uc002lyu.3:3778180:3784831:-;uc010dtq.3:3778180:3785133:-;uc002lyv.3:3778180:3789345:-
chr12:53861582-53861696:mpeak_17141|chr12_53845885_53873189_PCBP2_NM_+|	2538	-2,64	0,9	2,9	3,19E-03	5,67E-02	0	1	2	11	7	3	4976	6101	5952	4211	4733	4460	0	0	-2,61	0,35	-2,96	PCBP2	chr12:53861696:+	chr12_53467870_+;chr12_53467910_+	uc001sdc.4:53848584:53873226:+;uc001sdb.4:53848584:53873226:+;uc001sdl.4:53848584:53873226:+;uc001sde.4:53848584:53873226:+;uc001sdi.4:53848584:53873226:+;uc001sdd.4:53848584:53873226:+;uc001sdf.4:53848584:53873226:+;uc010soi.2:53861028:53873226:+;uc010soj.2:53861028:53873226:+;uc001sdk.4:53858597:53873226:+
chr8:117759479-117759536:mpeak_73112|chr8_117657342_117768062_EIF3H_NM_-|	261	-2,66	0,7	4,0	7,25E-05	7,93E-03	5	9	5	19	41	13	571	625	647	363	456	377	1	6	-1,99	0,62	-2,62	EIF3H	-	-	uc003yoa.3:117657244:117768036:-;uc003yob.3:117657244:117768232:-;uc011lhz.1:117671046:117768036:-
chr15:48454438-48454488:mpeak_25556|chr15_48446090_48470558_MYEF2_NR_-mpeak_25556|chr15_48435268_48470558_MYEF2_NM_-||	37	-2,66	1,1	2,5	1,18E-02	1,26E-01	3	0	1	5	3	5	84	114	82	68	49	31	2	9	-1,66	0,93	-2,59	MYEF2	chr15:48454437:-	chr15_48162241_-	uc001zwi.4:48435104:48470434:-;uc001zwj.4:48435104:48470434:-;uc001zwl.3:48445956:48458174:-
chr13:96335833-96335883:mpeak_21464|chr13_96329392_96443126_DNAJC3_NM_+|	76	-2,68	0,9	2,8	4,63E-03	7,13E-02	3	0	2	7	6	9	165	263	128	74	163	93	2	7	-1,96	0,75	-2,72	DNAJC3	-	-	uc001vmp.3:96329509:96395199:+;uc001vmq.3:96329509:96443284:+
chr9:115961129-115961207:mpeak_75909|chr9_115928435_115983641_FKBP15_NM_-|	38	-2,70	1,2	2,2	2,62E-02	1,99E-01	3	0	0	0	5	11	85	70	76	59	78	70	5	12	-2,24	0,16	-2,40	FKBP15	-	-	uc004bgs.2:115928357:115983523:-;uc011lxd.1:115931505:115969541:-;uc010mut.1:115940910:115965243:-;uc010muu.1:115940910:115985537:-;uc004bgt.2:115950036:115983523:-
chr6:159195985-159196136:mpeak_66729|chr6_159188110_159240456_EZR_NM_-|	473	-2,71	1,2	2,3	2,35E-02	1,86E-01	2	0	0	5	7	4	612	838	1097	965	857	1286	0	1	-2,80	-0,29	-2,51	EZR	chr6:159195982:-	chr6_158774951_-	uc003qrt.4:159187945:159239125:-;uc011efs.2:159187945:159239125:-;uc003qru.4:159187945:159239125:-
chr9:84209672-84209731:mpeak_74939|chr9_84199220_84304450_TLE1_NM_-|	409	-2,72	1,4	2,0	4,60E-02	2,75E-01	0	0	0	3	10	3	193	355	340	1469	1183	1349	#DIV/0!	0	-Inf	-2,17	-Inf	TLE1	-	chr9_81594758_-	uc004aly.3:84199112:84303155:-;uc004alz.3:84199112:84303155:-;uc011lsr.2:84199112:84303155:-;uc004ama.1:84205715:84303155:-
chr13:21742022-21742072:mpeak_20260|chr13_21729289_21750741_SKA3_NM_-|	33	-2,72	1,3	2,1	3,82E-02	2,50E-01	0	0	5	7	2	20	63	107	41	41	59	56	7	18	-2,50	0,43	-2,94	SKA3	chr13:21742017:-	chr13_21167883_-	uc001unt.3:21729288:21750616:-;uc001unu.3:21729241:21750616:-;uc001unv.3:21729288:21746562:-
chr10:7844920-7844979:mpeak_8176|chr10_7830092_7849621_ATP5C1_NM_+|	509	-2,72	1,3	2,0	4,21E-02	2,64E-01	2	0	0	0	10	2	630	1043	1437	1001	916	1061	0	1	-2,38	0,06	-2,45	ATP5C1	chr10:7844980:+	chr10_7803016_+	uc001iju.3:7830170:7848943:+;uc001ijv.3:7830170:7849625:+
chr12:48093306-48093368:mpeak_16606|chr12_48057373_48099844_RPAP3_NM_-|	16	-2,73	1,3	2,1	3,58E-02	2,40E-01	2	6	0	8	3	13	20	68	20	16	19	14	12	48	-1,48	1,12	-2,60	RPAP3	chr12:48093312:-	chr12_47699513_-	uc001rpr.3:48057287:48096623:-;uc001rps.3:48057287:48096623:-
chr2:240908591-240908703:mpeak_45821|chr2_240900603_240964819_NDUFA10_NM_-|	157	-2,77	0,8	3,5	4,95E-04	2,09E-02	3	4	1	8	14	15	276	296	443	280	210	328	1	4,64	-2,25	0,31	-2,56	NDUFA10	chr2:240908595:-;chr2:240908637:-	-	uc002vyn.3:240900534:240964718:-
chr19:46328074-46328129:mpeak_39026|chr19_46318955_46366548_SYMPK_NM_-|	373	-2,77	1,1	2,5	1,15E-02	1,25E-01	0	0	2	7	5	7	675	538	1032	507	667	1041	0	1	-3,15	0,02	-3,17	SYMPK	chr19:46328078:-	chr19_45824821_-	uc002pdn.3:46318817:46357753:-;uc002pdo.1:46324357:46357753:-;uc002pdp.1:46324357:46357753:-
chr2:136740976-136741030:mpeak_43478|chr2_136664977_136743254_DARS_NM_-|	356	-2,80	0,9	3,2	1,33E-03	3,41E-02	1	1	1	5	4	9	845	799	826	554	607	622	0	1	-2,30	0,47	-2,77	DARS	-	chr2_135983444_-	uc002tux.1:136664885:136743038:-
chr18:193651-193702:mpeak_35330|chr18_158482_211132_USP14_NM_+|	328	-2,82	1,3	2,1	3,35E-02	2,30E-01	5	0	0	1	18	1	531	969	807	558	504	540	1	1	-2,13	0,53	-2,66	USP14	chr18:193703:+	chr18_193702_+	uc002kkf.1:158698:211284:+;uc002kkg.1:158698:211284:+;uc010wyr.1:158698:211284:+
chr13:60590195-60590277:mpeak_21255|chr13_60240980_60738119_DIAPH3_NM_-|	17	-2,82	1,2	2,4	1,58E-02	1,48E-01	6	0	1	5	7	7	41	60	25	11	30	13	8	35	-1,53	1,22	-2,75	DIAPH3	-	chr13_60016139_-	uc001vht.4:60240717:60737900:-;uc001vhw.2:60240717:60737900:-;uc010aed.2:60240717:60737900:-;uc010aee.2:60240717:60737900:-;uc031qlw.1:60348302:60737900:-
chrX:1544119-1544177:mpeak_77175|chrX_1522382_1572655_ASMTL_NM_-|	40	-2,83	1,1	2,5	1,33E-02	1,36E-01	5	0	0	3	12	7	58	68	134	68	49	77	5	11	-2,19	0,43	-2,62	ASMTL	-	chrX_1425230_-	uc004cpx.2:1522161:1571733:-;uc004cpy.2:1522161:1571733:-;uc011mhe.2:1522161:1561140:-;uc011mhf.2:1522161:1561129:-
chr20:47760281-47760362:mpeak_47416|chr20_47731430_47804904_STAU1_NM_-|	593	-2,83	0,8	3,5	5,60E-04	2,15E-02	2	4	0	7	14	9	1099	1380	1350	916	1159	1172	0	1	-2,29	0,24	-2,53	STAU1	chr20:47760278:-;chr20:47760307:-	chr20_49143751_-;chr20_49143798_-;chr20_49143823_-	uc002xua.3:47731414:47770570:-;uc002xub.3:47731414:47770570:-;uc002xud.3:47731414:47782738:-;uc002xuc.3:47731414:47770570:-;uc002xue.3:47731414:47770570:-;uc002xuf.3:47731414:47770570:-;uc002xug.3:47731414:47782738:-
chr17:79816853-79816905:mpeak_35191|chr17_79801968_79818544_P4HB_NM_-|	1480	-2,86	1,3	2,2	2,66E-02	2,02E-01	0	0	3	3	0	14	2953	3032	4590	2267	2113	2786	0	0	-2,54	0,56	-3,10	P4HB	chr17:79816854:-	chr17_81858979_-	uc002kbn.1:79801887:79818347:-
chr19:12883969-12884119:mpeak_37488|chr19_12874245_12886434_HOOK2_NM_-|	143	-2,89	0,9	3,2	1,40E-03	3,46E-02	0	4	3	9	31	11	212	221	384	250	288	305	1	6	-2,95	-0,05	-2,91	HOOK2	-	-	uc002muy.2:12874095:12886263:-;uc002muz.2:12874095:12886263:-
chr11:77524198-77524257:mpeak_14214|chr11_77378536_77531880_RSF1_NM_-|	12	-2,91	1,5	2,0	4,87E-02	2,84E-01	1	8	1	11	9	5	48	24	6	18	10	2	12	86	-1,43	1,38	-2,81	RSF1	chr11:77524203:-	chr11_77813160_-	uc001oyo.1:77475582:77531760:-;uc001oyn.3:77377961:77531760:-
chrX:106200162-106200224:mpeak_78722|chrX_106184862_106243474_MORC4_NM_-|	70	-2,92	1,1	2,7	7,12E-03	9,30E-02	5	0	0	8	3	11	99	161	223	100	122	111	3	6	-2,20	0,54	-2,74	MORC4	-	-	uc004emu.4:106184708:106243199:-;uc004emv.4:106184781:106243199:-;uc004emw.4:106184781:106224625:-
chr3:180679288-180679350:mpeak_54726|chr3_180630233_180693909_FXR1_NM_+|	78	-2,94	1,2	2,4	1,87E-02	1,64E-01	0	3	0	9	4	3	124	191	141	154	207	103	2	4	-2,76	-0,03	-2,73	FXR1	-	chr3_180961550_+	uc003fkp.3:180665709:180694080:+;uc003fkq.3:180630473:180694080:+;uc003fkr.3:180630473:180693926:+;uc011bqj.2:180665712:180693926:+;uc003fks.3:180665712:180694080:+;uc011bqk.2:180630473:180693926:+;uc011bql.2:180633304:180694080:+
chrX:119068449-119068527:mpeak_78891|chrX_119059357_119077735_NKAP_NM_-|	13	-2,97	1,3	2,3	1,97E-02	1,68E-01	1	0	1	11	14	11	16	9	19	30	33	9	9	50	-3,78	-0,70	-3,08	NKAP	-	-	uc004esg.3:119059182:119070773:-;uc004esh.3:119059182:119077568:-
chr10:135000269-135000320:mpeak_11475|chr10_134973970_135038162_KNDC1_NM_+|	19	-2,97	1,3	2,2	2,78E-02	2,06E-01	0	0	4	1	4	15	27	39	58	16	35	29	9	26	-2,54	0,64	-3,18	KNDC1	chr10:135000321:+	chr10_133186816_+	uc001llz.1:134973971:135038394:+;uc001lma.1:134980977:135020499:+
chr10:102134194-102134256:mpeak_10522|chr10_102133332_102147793_OLMALINC_NR_+|	7	-2,97	1,5	2,0	4,33E-02	2,69E-01	12	3	4	4	11	19	6	5	18	4	0	3	64	310	-0,90	1,96	-2,86	OLMALINC	-	chr10_100374497_+	-
chr19:54681965-54682116:mpeak_39701|chr19_54678125_54693733_MBOAT7_NM_-|	244	-2,99	0,7	4,3	1,87E-05	2,77E-03	1	4	5	27	18	9	604	547	634	377	370	335	1	4,94	-2,42	0,72	-3,14	MBOAT7	chr19:54681977:-;chr19:54682042:-	chr19_54178261_-;chr19_54178326_-	uc010erg.3:54677737:54682564:-;uc010yem.2:54677737:54692222:-;uc002qdq.3:54677737:54692362:-;uc002qdr.3:54677737:54692362:-;uc002qds.3:54677737:54692184:-;uc010yen.2:54677737:54692184:-
chr11:69463382-69463482:mpeak_13796|chr11_69455872_69465885_CCND1_NM_+|	1857	-3,02	1,2	2,6	9,20E-03	1,09E-01	2	0	0	0	9	6	3856	3324	3686	3951	3867	3585	0	0	-2,72	-0,07	-2,65	CCND1	chr11:69463433:+;chr11:69463478:+	chr11_69648706_+	uc001opa.3:69456081:69466050:+
chr1:220932326-220932382:mpeak_7185|chr1_220921675_220957260_MARC2_NM_+|	14	-3,06	1,1	2,8	4,51E-03	7,02E-02	0	3	2	16	9	14	15	15	35	23	14	27	11	62	-3,08	0,01	-3,10	MARC2	chr1:220932377:+	chr1_220759034_+	uc001hmq.3:220921873:220955243:+;uc001hmr.3:220921873:220955243:+;uc009xdx.3:220921873:220957284:+
chr9:85653308-85653376:mpeak_74957|chr9_85597697_85678043_RASEF_NM_-|	54	-3,07	1,3	2,4	1,59E-02	1,48E-01	2	0	0	8	8	9	97	114	41	124	163	87	3	7	-3,43	-0,57	-2,86	RASEF	chr9:85653319:-	chr9_83038405_-	uc004amo.2:85597591:85677782:-
chr11:126280482-126280534:mpeak_15232|chr11_126225539_126283855_ST3GAL4_NM_+|	50	-3,07	1,3	2,3	2,09E-02	1,73E-01	0	1	1	7	0	9	78	96	129	92	103	90	1	8	-2,97	0,09	-3,06	ST3GAL4	chr11:126280535:+	chr11_126410638_+	uc001qds.3:126276050:126283942:+;uc001qdu.3:126276050:126283942:+;uc021qry.1:126276050:126283942:+;uc009zce.3:126276050:126283942:+;uc001qdw.3:126276354:126283942:+;uc001qdz.3:126278256:126283942:+;uc001qdx.1:126276384:126310533:+
chr16:69396780-69396848:mpeak_29884|chr16_69390959_69419891_TERF2_NM_-|	106	-3,08	1,4	2,3	2,40E-02	1,89E-01	0	0	0	3	3	8	77	133	89	261	320	373	#DIV/0!	1	-Inf	-1,67	-Inf	TERF2	chr16:69396775:-	chr16_69362853_-;chr16_69362895_-	uc002exd.4:69390800:69419748:-
chr2:219103444-219103585:mpeak_45188|chr2_219081816_219118613_ARPC2_NM_+|	1082	-3,09	0,9	3,6	3,12E-04	1,75E-02	6	0	0	16	6	9	2256	2787	2600	1520	1996	1791	0	1	-2,44	0,53	-2,96	ARPC2	chr2:219103482:+	chr2_218238771_+	uc002vhf.3:219103460:219118638:+;uc002vhd.4:219082193:219118638:+;uc002vhe.3:219082193:219118638:+
chr10:20453662-20453730:mpeak_8461|chr10_20105371_20568631_PLXDC2_NM_+|	53	-3,10	1,0	3,2	1,37E-03	3,46E-02	0	1	4	11	15	4	161	104	105	61	96	68	2	13	-2,63	0,71	-3,34	PLXDC2	chr10:20453717:+	chr10_20164783_+	uc001iqg.1:20106008:20568748:+;uc001iqh.1:20106008:20568748:+
chr7:155559422-155559487:mpeak_70569|chr7_155437202_155567686_RBM33_NM_+|	31	-3,11	1,6	2,0	4,57E-02	2,75E-01	0	0	0	12	3	23	8	23	7	84	112	103	#DIV/0!	13	-Inf	-2,97	-Inf	RBM33	chr7:155559480:+	chr7_155766783_+	uc003wmg.2:155559166:155567735:+;uc010lqk.1:155437570:155567735:+
chr18:24122934-24122994:mpeak_35823|chr18_24035865_24237365_KCTD1_NM_-|	25	-3,13	1,1	3,0	3,07E-03	5,57E-02	0	3	1	4	13	7	71	43	47	42	48	26	4	21	-2,61	0,47	-3,07	KCTD1	chr18:24122935:-	chr18_26542972_-;chr18_26543005_-	uc010xbj.3:24035706:24128500:-;uc031rhu.1:24035706:24237332:-
chr9:116309399-116309502:mpeak_75974|chr9_116207008_116359047_RGS3_NM_+|	28	-3,13	1,4	2,2	2,64E-02	2,00E-01	0	0	0	4	6	5	17	34	25	84	55	104	#DIV/0!	6	-Inf	-1,66	-Inf	RGS3	-	-	uc004bht.4:116263856:116359233:+;uc010muy.4:116263856:116359233:+;uc004bhq.4:116222536:116359233:+;uc004bhs.4:116245250:116359233:+
chr5:171614885-171614944:mpeak_62458|chr5_171472026_171615346_STK10_NM_-|	32	-3,14	1,5	2,1	3,81E-02	2,49E-01	0	0	0	0	7	9	22	42	17	80	87	115	#DIV/0!	9	-Inf	-1,80	-Inf	STK10	-	-	uc003mbo.1:171471885:171615046:-
chr20:20027618-20027704:mpeak_46449|chr20_20017006_20036690_CRNKL1_NM_-|	92	-3,17	1,2	2,6	9,86E-03	1,13E-01	0	3	0	9	2	4	169	248	199	124	179	163	1	3	-2,59	0,40	-2,99	CRNKL1	chr20:20027650:-	-	uc002wrs.3:20016838:20036658:-
chr19:54672919-54673002:mpeak_39698|chr19_54664111_54676944_TMC4_NM_-|	33	-3,19	1,3	2,5	1,15E-02	1,25E-01	6	0	0	3	7	21	51	70	97	42	38	63	8	22	-2,41	0,61	-3,02	TMC4	chr19:54672930:-	chr19_54169194_-	uc010erf.3:54664042:54676812:-;uc002qdo.3:54664042:54676812:-
chr18:24124855-24124992:mpeak_35826|chr18_24035865_24237365_KCTD1_NM_-|	38	-3,20	0,7	4,9	9,01E-07	4,12E-04	6	8	10	43	56	60	71	43	47	42	48	26	15	137	-2,76	0,47	-3,23	KCTD1	chr18:24124859:-;chr18:24124931:-	chr18_26544968_-	uc010xbj.3:24035706:24128500:-;uc031rhu.1:24035706:24237332:-
chr2:220100426-220100523:mpeak_45284|chr2_220094478_220101043_ANKZF1_NM_+|	41	-3,20	1,6	2,1	4,00E-02	2,55E-01	0	0	0	1	9	2	26	40	71	93	79	175	#DIV/0!	4	-Inf	-1,34	-Inf	ANKZF1	-	chr2_219235754_+	uc002vkg.3:220094979:220101167:+;uc002vkh.3:220097872:220101167:+;uc002vki.3:220094979:220101167:+
chr1:117510922-117510995:mpeak_4036|chr1_117452544_117529422_PTGFRN_NM_+|	526	-3,20	1,0	3,1	1,64E-03	3,84E-02	0	4	0	8	5	7	1228	969	1497	827	704	1061	0	1	-2,40	0,51	-2,91	PTGFRN	chr1:117510978:+	chr1_116968373_+	uc001egv.1:117452825:117529589:+
chr9:115946077-115946131:mpeak_75906|chr9_115928435_115983641_FKBP15_NM_-|	38	-3,21	1,2	2,6	9,01E-03	1,08E-01	0	0	1	1	6	7	85	70	76	59	78	70	2	7	-3,35	0,16	-3,51	FKBP15	-	-	uc004bgr.2:115928357:115946628:-;uc011lxc.1:115928357:115950198:-;uc004bgs.2:115928357:115983523:-;uc011lxd.1:115931505:115969541:-;uc010mut.1:115940910:115965243:-;uc010muu.1:115940910:115985537:-
chr16:627162-627277:mpeak_27520|chr16_619967_632882_PIGQ_NM_+|	44	-3,22	1,0	3,1	2,17E-03	4,45E-02	0	1	1	9	3	9	110	79	95	68	68	85	1	10	-3,00	0,37	-3,36	PIGQ	chr16:627217:+;chr16:627280:+	chr16_577238_+;chr16_577298_+	uc010bqw.3:624074:633035:+;uc002chn.3:624074:633035:+;uc002cho.3:624074:633634:+;uc010uui.2:622568:632256:+
chr2:86305170-86305281:mpeak_42264|chr2_86254646_86333278_POLR1A_NM_-|	56	-3,22	1,4	2,3	2,08E-02	1,73E-01	0	0	0	7	6	3	41	70	53	203	182	101	#DIV/0!	3	-Inf	-1,56	-Inf	POLR1A	chr2:86305164:-	-	uc002sqs.3:86254545:86332899:-
chr6:99991657-99991714:mpeak_65450|chr6_99991485_100016690_CCNC_NM_-|	109	-3,24	1,2	2,7	5,97E-03	8,44E-02	0	4	0	0	10	5	289	328	203	116	207	140	1	5,03	-2,04	0,83	-2,87	CCNC	chr6:99991656:-	chr6_99543762_-;chr6_99543812_-	uc003pqd.3:99991430:100009281:-;uc003pqe.3:99991430:100016403:-;uc010kcs.3:99991430:100016403:-;uc011eah.2:99991430:100009281:-
chr4:24541467-24541582:mpeak_55977|chr4_24529664_24586184_DHX15_NM_-|	317	-3,24	0,8	4,3	1,85E-05	2,77E-03	2	10	5	51	30	70	357	952	558	646	544	581	1	9	-3,13	0,08	-3,20	DHX15	chr4:24541429:-;chr4:24541474:-;chr4:24541528:-	chr4_24539852_-	uc003gqx.3:24529546:24586016:-
chr16:23434986-23435041:mpeak_28648|chr16_23400407_23464512_COG7_NM_-|	88	-3,25	1,4	2,4	1,75E-02	1,56E-01	0	0	2	11	0	8	141	203	265	123	80	224	1	7	-3,12	0,51	-3,64	COG7	chr16:23434985:-	chr16_23423664_-	uc002dlo.3:23400240:23464315:-
chr6:32948115-32948243:mpeak_64097|chr6_32936436_32948358_BRD2_NM_+|	128	-3,27	1,4	2,3	2,06E-02	1,73E-01	0	0	1	28	8	14	51	142	71	396	332	490	1	4	-6,12	-2,20	-3,92	BRD2	-	chr6_32980388_+;chr6_32980404_+	uc003ocn.4:32940675:32948495:+;uc003ocp.4:32943187:32948495:+;uc003ocq.4:32940675:32948495:+;uc010juh.3:32940675:32948495:+;uc021ywf.1:32942350:32948495:+
chr7:99009759-99009926:mpeak_69090|chr7_99006600_99017013_BUD31_NM_+|	278	-3,29	1,4	2,4	1,76E-02	1,57E-01	0	3	0	4	12	0	611	621	638	378	577	492	0	2	-2,66	0,37	-3,03	BUD31	chr7:99009918:+	chr7_99412186_+	uc011kiu.1:99008715:99015272:+;uc003uqf.3:99008715:99017064:+;uc011kiv.1:99008715:99015272:+;uc003uqg.4:99008715:99017064:+
chr20:46340417-46340486:mpeak_47320|chr20_46287136_46415360_SULF2_NM_-|	611	-3,31	1,2	2,7	6,28E-03	8,66E-02	2	0	0	3	10	4	1164	1055	1673	1135	899	1386	0	0	-2,86	0,19	-3,04	SULF2	chr20:46340428:-	-	uc002xto.3:46287105:46386107:-;uc010ghv.1:46318865:46386107:-;uc002xtr.3:46287105:46386107:-;uc002xtq.3:46287105:46386107:-
chr14:90389617-90389680:mpeak_24079|chr14_90263668_90421121_EFCAB11_NM_-|	36	-3,33	1,1	3,0	2,70E-03	5,18E-02	0	5	0	4	13	13	47	116	68	50	57	58	7	18	-2,55	0,48	-3,03	EFCAB11	chr14:90389621:-	-	uc001xxs.3:90263586:90420701:-;uc001xxt.3:90263586:90421004:-
chr8:144883598-144883727:mpeak_73725|chr8_144873478_144897549_SCRIB_NM_-|	274	-3,36	1,0	3,3	8,66E-04	2,82E-02	2	0	1	8	5	14	434	596	661	524	489	549	0	2	-3,16	0,11	-3,27	SCRIB	chr8:144883650:-	-	uc003yzo.1:144873332:144897542:-;uc003yzp.1:144873332:144897542:-
chr22:32341438-32341490:mpeak_49772|chr22_32340478_32352125_YWHAH_NM_+|	366	-3,38	1,3	2,5	1,18E-02	1,26E-01	1	0	0	5	0	7	758	611	680	731	768	828	0	1	-3,46	-0,18	-3,27	YWHAH	chr22:32341489:+	chr22_31945502_+	uc003alz.3:32340719:32352779:+
chr4:54143500-54143651:mpeak_56470|chr4_53740228_54232242_SCFD2_NM_-|	106	-3,40	1,1	3,1	1,71E-03	3,85E-02	1	4	0	5	5	21	174	274	267	180	125	222	1	6	-2,66	0,44	-3,10	SCFD2	chr4:54143511:-	chr4_53277346_-	uc003gzu.3:53740135:54232108:-;uc010igm.3:53740135:54232108:-
chr3:196286730-196286801:mpeak_55195|chr3_196281678_196295413_WDR53_NM_-|	7	-3,40	1,5	2,2	2,54E-02	1,95E-01	3	0	0	26	7	19	2	5	3	7	5	4	102	327	-3,89	-0,63	-3,26	WDR53	chr3:196286708:-;chr3:196286734:-	chr3_196559851_-	uc003fwt.3:196281081:196288346:-
chr17:60513039-60513122:mpeak_34185|chr17_60501245_60525935_METTL2A_NM_+|	89	-3,43	1,3	2,6	1,07E-02	1,19E-01	1	0	0	7	10	4	101	151	129	184	191	292	1	3	-4,17	-0,81	-3,36	METTL2A	chr17:60513096:+	chr17_62435733_+	uc002izv.2:60501263:60526090:+;uc002izw.3:60503865:60526090:+
chr14:102681285-102681344:mpeak_24555|chr14_102606188_102689166_WDR20_NM_+|	6	-3,45	1,6	2,1	3,32E-02	2,29E-01	0	0	0	4	8	5	2	5	8	12	16	14	#DIV/0!	39	-Inf	-1,47	-Inf	WDR20	chr14:102681342:+	chr14_102215002_+	uc001yld.3:102606260:102689220:+;uc001yle.3:102606260:102689220:+
chrX:48755813-48755865:mpeak_77876|chrX_48755194_48760204_PQBP1_NM_+|	64	-3,46	1,3	2,6	9,69E-03	1,12E-01	1	0	0	1	5	5	140	97	128	122	125	142	1	3	-3,34	-0,09	-3,25	PQBP1	chrX:48755859:+	-	uc022bvv.1:48755792:48760361:+;uc004dle.3:48755792:48760361:+;uc004dlf.3:48755792:48760361:+;uc004dlg.3:48755792:48760361:+;uc004dln.3:48755792:48760361:+;uc004dlk.3:48755792:48760361:+;uc004dlh.3:48755792:48760361:+;uc004dli.3:48755792:48760361:+;uc004dlj.1:48755792:48759892:+;uc010nij.3:48755792:48760361:+
chr2:48029129-48029179:mpeak_41321|chr2_48010220_48033917_MSH6_NM_+|	178	-3,56	1,5	2,3	1,98E-02	1,69E-01	0	0	0	0	3	9	155	361	166	545	626	270	#DIV/0!	1	-Inf	-1,08	-Inf	MSH6	chr2:48029181:+	chr2_47802040_+	uc010fbj.3:48026028:48033999:+;uc010yoj.2:48026028:48033999:+;uc002rwd.4:48010372:48033999:+
chr6:170700796-170700929:mpeak_66948|chr6_170599790_170713850_FAM120B_NM_+|	150	-3,56	1,3	2,7	7,24E-03	9,35E-02	0	1	0	8	1	6	256	267	323	318	306	309	0	2	-3,58	-0,14	-3,43	FAM120B	chr6:170700931:+	chr6_170391808_+;chr6_170391841_+	uc003qxp.3:170626478:170713678:+;uc011ehd.2:170639625:170713678:+
chr22:41537045-41537096:mpeak_50108|chr22_41488613_41572776_EP300_NM_+|	37	-3,58	1,5	2,4	1,71E-02	1,55E-01	0	0	0	0	7	10	35	45	34	103	145	61	#DIV/0!	8	-Inf	-1,43	-Inf	EP300	-	chr22_41141074_+	uc003azl.4:41489008:41574960:+
chr17:38375696-38375776:mpeak_32833|chr17_38375573_38434436_WIPF2_NM_+|	22	-3,60	1,4	2,5	1,16E-02	1,26E-01	0	0	0	3	8	9	23	13	25	69	46	70	#DIV/0!	11	-Inf	-1,62	-Inf	WIPF2	-	-	-
chr1:52861960-52862047:mpeak_2379|chr1_52839047_52870143_ORC1_NM_-|	51	-3,61	1,4	2,7	7,81E-03	9,92E-02	2	0	0	11	3	9	56	152	94	73	58	151	2	8	-3,34	0,10	-3,44	ORC1	-	-	uc001ctt.3:52838852:52867895:-;uc010oni.2:52838852:52867895:-;uc001ctu.3:52838852:52867895:-
chr2:225370665-225370752:mpeak_45423|chr2_225339093_225450114_CUL3_NM_-|	53	-3,62	1,4	2,6	9,25E-03	1,09E-01	0	1	0	8	7	6	66	132	47	118	145	110	2	6	-4,06	-0,60	-3,45	CUL3	-	chr2_224505968_-	uc010fwy.2:225338961:225434489:-;uc002vny.3:225338961:225449726:-;uc010zls.2:225338961:225449726:-
chr22:50641298-50641354:mpeak_50450|chr22_50639407_50655633_SELO_NM_+|	12	-3,63	1,5	2,4	1,45E-02	1,43E-01	2	0	0	7	5	6	19	10	48	11	16	26	9	34	-2,94	0,52	-3,46	SELO	chr22:50641350:+	chr22_50202951_+	uc021wry.1:50639465:50655798:+
chr7:156754254-156754311:mpeak_70603|chr7_156742416_156762222_NOM1_NM_+|	28	-3,65	1,4	2,6	1,01E-02	1,15E-01	0	0	0	4	3	9	31	42	24	80	59	79	#DIV/0!	7	-Inf	-1,17	-Inf	NOM1	chr7:156754312:+	chr7_156961616_+	uc003wmy.3:156742431:156762397:+
chr3:44401234-44401306:mpeak_51590|chr3_44379610_44448933_TCAIM_NM_+|	30	-3,68	1,8	2,0	4,14E-02	2,61E-01	66	88	84	28	40	36	0	0	14	0	0	0	581	#DIV/0!	1,20	Inf	-Inf	TCAIM	chr3:44401292:+;chr3:44401327:+	chr3_44359811_+	uc010him.3:44396274:44449174:+;uc003cnd.4:44396274:44449174:+
chr8:30411232-30411284:mpeak_71298|chr8_30242016_30428153_RBPMS_NM_+|	31	-3,68	1,8	2,1	3,84E-02	2,50E-01	1	0	0	5	15	0	44	25	74	68	35	108	2	15	-4,15	-0,55	-3,60	RBPMS	chr8:30411283:+	chr8_30553765_+	uc003xic.1:30242608:30416466:+;uc003xid.1:30242608:30416404:+;uc003xie.1:30242608:30416466:+
chr4:17500694-17500823:mpeak_55897|chr4_17488859_17513857_QDPR_NM_-|	256	-3,68	1,2	3,2	1,40E-03	3,46E-02	0	0	1	5	5	10	472	541	630	459	469	484	0	1	-3,83	0,22	-4,05	QDPR	-	chr4_17499071_-	uc003gpd.3:17488753:17513677:-;uc003gpe.3:17488753:17513677:-
chr3:133732597-133732687:mpeak_53669|chr3_133653674_133748920_SLCO2A1_NM_-|	7	-3,68	1,9	2,0	4,86E-02	2,84E-01	0	0	0	0	5	6	5	18	4	9	13	20	#DIV/0!	39	-Inf	-0,67	-Inf	SLCO2A1	-	-	uc003eqa.4:133653556:133748646:-;uc011blv.2:133661444:133748646:-
chr14:95561684-95561735:mpeak_24315|chr14_95557000_95624347_DICER1_NM_-|	116	-3,70	1,4	2,6	9,67E-03	1,12E-01	0	1	0	5	3	5	220	330	141	189	353	140	1	2	-3,49	0,02	-3,51	DICER1	chr14:95561683:-	chr14_95095351_-	uc010avh.1:95556834:95571447:-;uc021sbc.1:95556950:95599795:-;uc001ydv.3:95556834:95599795:-;uc001ydw.2:95556834:95599795:-;uc001ydx.2:95556834:95599795:-
chr3:72861937-72862030:mpeak_52514|chr3_72799987_72897598_SHQ1_NM_-|	46	-3,71	1,5	2,4	1,51E-02	1,45E-01	1	0	0	0	12	10	30	74	99	103	114	112	2	10	-4,23	-0,69	-3,54	SHQ1	chr3:72861939:-	chr3_72812795_-	uc003dpf.3:72799434:72897491:-;uc010hod.3:72799434:72891494:-
chr2:29092290-29092344:mpeak_40783|chr2_29073108_29093175_TRMT61B_NM_-|	10	-3,71	1,9	2,0	4,76E-02	2,81E-01	0	0	0	11	7	0	15	11	4	23	19	28	#DIV/0!	38	-Inf	-1,18	-Inf	TRMT61B	chr2:29092291:-	chr2_28869426_-	uc002rmm.3:29073064:29093143:-
chr2:242651909-242651968:mpeak_45922|chr2_242641455_242664403_ING5_NM_+|	21	-3,72	1,6	2,4	1,70E-02	1,54E-01	0	0	0	7	1	15	16	19	20	53	63	55	#DIV/0!	13	-Inf	-1,63	-Inf	ING5	chr2:242651971:+	chr2_241712548_+	uc021vzk.1:242641480:242659036:+;uc002wcd.3:242641480:242664446:+
chr17:41352732-41352785:mpeak_33082|chr17_41322487_41361919_NBR1_NM_+|	175	-3,73	1,3	2,8	4,77E-03	7,24E-02	2	0	0	1	3	15	341	411	415	299	347	261	1	2	-3,05	0,37	-3,42	NBR1	chr17:41352783:+;chr17:41352808:+	chr17_43200765_+;chr17_43200808_+	uc010czd.3:41327816:41362093:+;uc010diz.3:41327816:41362093:+;uc010whu.2:41327816:41361662:+;uc010whv.2:41327816:41362093:+;uc010whw.2:41327816:41361933:+
chr7:44664563-44664682:mpeak_68089|chr7_44646120_44747477_OGDH_NM_+|	635	-3,74	1,0	3,7	1,78E-04	1,32E-02	0	4	0	11	10	13	1042	1219	1821	1170	981	1351	0	1	-3,19	0,22	-3,41	OGDH	chr7:44664595:+;chr7:44664677:+	chr7_44624976_+;chr7_44624995_+;chr7_44625077_+	uc003tlm.3:44663942:44715826:+;uc011kbx.2:44663942:44747598:+;uc003tln.3:44663942:44747598:+;uc011kby.2:44663942:44747598:+;uc003tlp.3:44663942:44747598:+
chr18:60192455-60192510:mpeak_36366|chr18_60190657_60251678_ZCCHC2_NR_+mpeak_36366|chr18_60190657_60243744_ZCCHC2_NM_+||	46	-3,75	1,4	2,6	8,97E-03	1,07E-01	0	0	0	5	7	13	62	24	32	141	182	90	#DIV/0!	6	-Inf	-1,80	-Inf	ZCCHC2	chr18:60192510:+	chr18_62525276_+	uc002lip.4:60190657:60243812:+
chr7:6627050-6627101:mpeak_67340|chr7_6617064_6628247_ZDHHC4_NM_+|	77	-3,79	1,3	2,9	4,15E-03	6,66E-02	0	0	1	9	0	6	191	237	158	91	128	105	1	7	-3,43	0,86	-4,28	ZDHHC4	chr7:6627100:+	chr7_6587469_+	uc003sqi.3:6620192:6628541:+;uc003sql.3:6620192:6628541:+;uc003sqj.3:6620192:6628541:+;uc003sqh.3:6620192:6628541:+
chr20:47900150-47900226:mpeak_47442|chr20_47894714_47905581_ZFAS1_NR_+|	261	-3,79	1,2	3,2	1,56E-03	3,73E-02	0	0	2	5	9	7	269	1170	534	386	312	438	0	2	-3,35	0,80	-4,15	ZFAS1	-	chr20_49283691_+	-
chr13:95255004-95255059:mpeak_21447|chr13_95254103_95279266_GPR180_NM_+|	47	-3,82	1,2	3,1	1,71E-03	3,85E-02	0	3	0	3	7	12	105	106	89	68	97	77	3	9	-3,10	0,31	-3,40	GPR180	-	chr13_94602800_+	uc001vly.3:95254181:95279425:+
chr15:67972572-67972626:mpeak_26420|chr15_67835020_68098983_MAP2K5_NM_+|	21	-3,85	1,6	2,4	1,44E-02	1,42E-01	0	0	0	1	5	9	27	24	26	18	68	72	#DIV/0!	10	-Inf	-1,03	-Inf	MAP2K5	chr15:67972628:+	chr15_67680288_+	uc002aqu.3:67835673:68099088:+;uc002aqv.3:67835673:68099088:+;uc010ujw.2:67841518:68099088:+;uc002aqx.3:67934820:68099088:+
chr14:102389693-102389769:mpeak_24499|chr14_102228134_102391477_PPP2R5C_NM_+|	62	-3,87	1,3	3,0	3,17E-03	5,66E-02	1	0	0	3	6	6	112	140	120	130	120	111	1	4	-3,65	0,04	-3,70	PPP2R5C	chr14:102389749:+	chr14_101923432_+	uc010txr.2:102228230:102391609:+;uc001ykk.3:102228230:102391609:+;uc001yko.3:102276279:102391609:+;uc001ykp.3:102276279:102391609:+
chr16:4031545-4031663:mpeak_27926|chr16_4016967_4166186_ADCY9_NM_-|	27	-3,88	1,3	3,0	2,80E-03	5,33E-02	2	0	0	7	18	14	22	62	37	69	45	47	6	24	-4,05	-0,41	-3,64	ADCY9	chr16:4031544:-	chr16_3981544_-	uc002cvx.3:4015775:4165443:-
chr19:32919657-32919707:mpeak_38200|chr19_32896654_32972984_DPY19L3_NM_+|	17	-3,93	2,0	2,0	4,65E-02	2,77E-01	0	0	0	0	0	12	22	19	36	23	37	56	#DIV/0!	31	-Inf	-0,59	-Inf	DPY19L3	chr19:32919704:+	-	uc002ntg.3:32899159:32973146:+;uc002nth.2:32899159:32973146:+
chr19:12884498-12884574:mpeak_37489|chr19_12874245_12886434_HOOK2_NM_-|	143	-3,93	1,0	3,8	1,36E-04	1,15E-02	0	1	1	19	19	9	212	221	384	250	288	305	0	6	-4,12	-0,05	-4,07	HOOK2	-	chr19_12773684_-	uc002muy.2:12874095:12886263:-;uc002muz.2:12874095:12886263:-
chr9:22008447-22008590:mpeak_74246|chr9_22006246_22009312_CDKN2B_NM_-|	38	-3,94	1,6	2,4	1,58E-02	1,48E-01	0	0	0	0	7	11	77	16	43	68	121	115	#DIV/0!	9	-Inf	-1,15	-Inf	CDKN2B	-	-	uc003zpo.3:22005985:22008952:-
chr15:99251786-99251838:mpeak_27334|chr15_99191767_99500289_IGF1R_NM_+|	324	-3,96	1,4	2,8	5,70E-03	8,22E-02	0	0	0	0	3	12	400	510	438	854	731	939	#DIV/0!	1	-Inf	-0,91	-Inf	IGF1R	-	chr15_98708607_+	uc010urq.2:99192810:99465671:+;uc002bul.3:99192810:99500671:+;uc010bon.3:99192810:99500671:+
chr9:15486842-15486936:mpeak_74181|chr9_15465578_15511003_PSIP1_NM_-|	33	-3,97	1,4	2,9	4,02E-03	6,55E-02	0	3	0	11	3	3	65	140	51	32	52	38	3	14	-2,73	1,06	-3,80	PSIP1	-	-	uc003zlz.4:15471204:15510186:-;uc003zma.4:15471204:15510186:-;uc003zly.3:15471296:15510186:-;uc003zlv.4:15465517:15510186:-;uc003zlw.4:15465517:15510186:-
chr16:89781086-89781212:mpeak_30820|chr16_89774362_89787394_VPS9D1_NM_-|	10	-3,98	1,5	2,6	8,87E-03	1,07E-01	0	0	0	4	8	9	5	15	9	23	19	24	#DIV/0!	31	-Inf	-1,23	-Inf	VPS9D1	-	-	uc002fol.1:89774268:89783195:-;uc002fom.1:89774268:89787269:-
chr10:1055573-1055628:mpeak_7997|chr10_1034348_1063014_GTPBP4_NM_+|	535	-4,01	1,3	3,1	2,02E-03	4,28E-02	0	0	0	4	7	3	888	715	894	1361	1197	1349	#DIV/0!	0	-Inf	-0,65	-Inf	GTPBP4	chr10:1055624:+	chr10_1009636_+;chr10_1009683_+	uc001ift.3:1034419:1063167:+;uc010qad.2:1042070:1063167:+;uc010qae.2:1038521:1063167:+
chr20:60916942-60916998:mpeak_47916|chr20_60884531_60942368_LAMA5_NM_-|	220	-4,02	1,4	2,8	4,63E-03	7,13E-02	1	0	0	4	3	13	276	504	417	607	500	316	0	1	-4,10	-0,25	-3,85	LAMA5	chr20:60916947:-	chr20_62341892_-	uc002ycq.3:60884391:60942301:-;uc021wfw.1:60884391:60942301:-
chr16:70359534-70359594:mpeak_29983|chr16_70323669_70367423_DDX19B_NM_+|	80	-4,04	1,4	2,9	3,49E-03	5,94E-02	0	3	0	1	7	24	146	141	180	127	134	202	2	7	-3,68	0,01	-3,69	DDX19B	chr16:70359616:+	-	uc010vlx.3:70358551:70367485:+;uc031qwx.1:70351429:70367485:+;uc010vlv.3:70328748:70367485:+;uc010vlw.3:70351429:70367485:+;uc002eyo.4:70333200:70367485:+;uc002eyp.4:70333200:70367485:+;uc002eyq.4:70351429:70367485:+;uc002eys.4:70333200:70405889:+
chr14:104204486-104204553:mpeak_24699|chr14_104201532_104313927_PPP1R13B_NM_-|	23	-4,07	1,7	2,4	1,78E-02	1,57E-01	0	0	0	1	12	32	10	20	9	58	32	98	#DIV/0!	24	-Inf	-2,26	-Inf	PPP1R13B	chr14:104204483:-	chr14_103738149_-	uc001yof.1:104201490:104313644:-
chr19:38872927-38873002:mpeak_38542|chr19_38865189_38873892_PSMD8_NM_+|	926	-4,10	1,3	3,1	2,09E-03	4,36E-02	1	0	0	0	4	7	1982	1849	2663	1384	1571	1656	0	0	-3,32	0,49	-3,81	PSMD8	chr19:38872979:+	chr19_38382337_+	uc002oii.4:38865241:38874030:+
chr17:80111486-80111553:mpeak_35242|chr17_80059742_80170689_CCDC57_NM_-|	57	-4,10	1,1	3,6	3,09E-04	1,75E-02	0	0	2	7	14	15	148	60	160	82	83	114	2	13	-4,05	0,40	-4,44	CCDC57	chr17:80111483:-	chr17_82153623_-	uc002kdx.1:80059557:80159820:-
chr16:87445020-87445079:mpeak_30611|chr16_87443941_87525460_ZCCHC14_NM_-|	32	-4,10	1,5	2,8	4,78E-03	7,25E-02	0	0	0	1	8	9	37	62	26	96	87	60	#DIV/0!	7	-Inf	-0,96	-Inf	ZCCHC14	chr16:87445021:-	chr16_87411396_-;chr16_87411433_-	uc002fjz.1:87443885:87525433:-
chr3:127811197-127811322:mpeak_53386|chr3_127800252_127842671_RUVBL1_NM_-|	620	-4,11	1,4	3,0	2,77E-03	5,29E-02	0	0	1	12	6	7	534	1254	1434	1370	1086	1736	0	1	-5,14	-0,38	-4,76	RUVBL1	chr3:127811257:-	chr3_128092414_-	uc003ekh.3:127800092:127842567:-;uc010hss.3:127800210:127842567:-;uc003ekf.3:127784054:127838218:-
chr19:42368345-42368404:mpeak_38774|chr19_42363987_42375418_RPS19_NM_+|	2411	-4,12	1,1	3,6	3,00E-04	1,75E-02	2	0	0	8	4	7	5673	6547	6586	3107	3074	3927	0	0	-3,03	0,90	-3,93	RPS19	-	chr19_41864326_+	uc002ort.3:42364844:42375445:+
chr3:47542930-47542983:mpeak_51725|chr3_47537687_47555199_ELP6_NM_-|	31	-4,16	1,4	2,9	3,38E-03	5,82E-02	0	0	0	3	2	7	59	57	43	74	73	52	#DIV/0!	6	-Inf	-0,33	-Inf	ELP6	chr3:47542932:-	chr3_47501438_-	uc003crk.3:47537558:47555080:-;uc011bba.2:47537558:47552694:-;uc003crl.1:47539694:47555080:-
chr5:34918463-34918573:mpeak_59200|chr5_34915819_34925330_BRIX1_NM_+|	59	-4,22	1,6	2,7	7,88E-03	9,96E-02	0	0	0	12	8	0	73	114	59	151	170	116	#DIV/0!	7	-Inf	-0,82	-Inf	BRIX1	-	chr5_34918365_+	uc003jiz.3:34915843:34920033:+;uc011col.1:34915843:34922897:+;uc003jja.3:34915843:34925600:+
chr2:122133624-122133674:mpeak_43143|chr2_122098523_122407052_CLASP1_NM_-|	120	-4,23	1,4	2,9	3,41E-03	5,85E-02	0	0	0	5	2	14	135	215	109	308	384	264	#DIV/0!	2	-Inf	-1,06	-Inf	CLASP1	chr2:122133620:-	chr2_121376048_-	uc002tmy.3:122098436:122135224:-;uc002tnf.3:122122627:122145428:-;uc002tmz.3:122098436:122159239:-;uc002tna.3:122098436:122159239:-;uc002tnc.3:122098436:122363471:-;uc010yyz.2:122098436:122363471:-;uc010yza.2:122098436:122363471:-;uc021vnl.1:122098436:122363471:-
chr13:100889692-100889749:mpeak_21609|chr13_100741268_101182351_PCCA_NM_+|	14	-4,24	1,5	2,7	5,97E-03	8,44E-02	0	0	0	1	5	10	24	23	10	32	35	26	#DIV/0!	18	-Inf	-0,71	-Inf	PCCA	chr13:100889751:+	chr13_100237495_+	uc001voo.3:100741374:101182420:+;uc010aga.3:100741374:101182420:+;uc010tiz.2:100741374:101182420:+
chr11:118499520-118499650:mpeak_14944|chr11_118477212_118527392_PHLDB1_NM_+|	41	-4,24	1,4	3,0	2,32E-03	4,68E-02	0	0	0	3	4	7	55	58	81	118	63	99	#DIV/0!	5,12	-Inf	-0,53	-Inf	PHLDB1	chr11:118499564:+	chr11_118628845_+;chr11_118628935_+	uc001ptv.2:118498139:118527533:+;uc001ptr.2:118484551:118527533:+;uc001pts.3:118484551:118527533:+;uc001ptt.3:118484551:118527533:+
chr2:201446013-201446072:mpeak_44711|chr2_201390864_201448171_SGOL2_NM_+|	6	-4,27	1,9	2,3	2,19E-02	1,79E-01	0	0	0	15	6	5	2	10	1	16	10	5	#DIV/0!	82	-Inf	-1,17	-Inf	SGOL2	chr2:201446063:+	chr2_200581340_+	uc002uvw.2:201397698:201448187:+;uc010zhe.1:201397698:201448179:+
chr1:62394092-62394150:mpeak_2600|chr1_62208148_62626579_INADL_NM_+|	16	-4,30	1,6	2,6	8,39E-03	1,03E-01	0	1	0	0	2	9	40	38	38	20	31	14	3	25	-3,14	0,82	-3,96	INADL	chr1:62394143:+	-	uc009waf.1:62228564:62579916:+;uc001daa.2:62228564:62579922:+;uc001dad.3:62253485:62579922:+;uc001dab.3:62228564:62626607:+
chr4:148867763-148867820:mpeak_58103|chr4_148653452_148993143_ARHGAP10_NM_+|	28	-4,32	1,5	2,9	4,02E-03	6,55E-02	0	0	0	7	0	7	48	47	50	47	78	54	#DIV/0!	12	-Inf	-0,32	-Inf	ARHGAP10	-	-	uc003ilf.3:148653452:148993232:+;uc003ilg.3:148827807:148993232:+;uc003ilh.3:148867721:148993232:+
chr16:30380231-30380286:mpeak_28999|chr16_30369894_30381522_TBC1D10B_NM_-|	53	-4,32	1,4	3,1	2,03E-03	4,28E-02	0	0	0	9	8	4	50	63	101	85	156	162	#DIV/0!	5,44	-Inf	-0,91	-Inf	TBC1D10B	chr16:30380232:-	chr16_30368912_-	uc002dxu.2:30369264:30381504:-
chr17:7588567-7588629:mpeak_31508|chr17_7573008_7590868_TP53_NM_-|	268	-4,33	1,2	3,5	4,12E-04	1,99E-02	2	0	0	4	10	12	533	462	904	355	352	581	0	2	-3,50	0,56	-4,06	TP53	chr17:7588533:-;chr17:7588567:-	chr17_7685235_-	-
chr3:47719983-47720033:mpeak_51742|chr3_47629796_47823405_SMARCC1_NM_-|	626	-4,35	1,7	2,6	8,99E-03	1,07E-01	0	0	0	0	0	12	789	1217	1477	1284	1104	1629	#DIV/0!	1	-Inf	-0,21	-Inf	SMARCC1	chr3:47719980:-	chr3_47678493_-	uc003crq.2:47629698:47823287:-;uc011bbd.1:47629698:47787471:-
chr16:30582321-30582385:mpeak_29032|chr16_30581757_30583728_ZNF688_NM_-|	33	-4,37	1,4	3,2	1,40E-03	3,46E-02	1	0	0	4	8	7	49	64	87	53	48	74	2	11	-4,04	0,19	-4,24	ZNF688	-	-	uc002dys.2:30581236:30583596:-;uc002dyt.2:30581236:30582950:-
chr3:4779850-4779984:mpeak_50555|chr3_4535031_4887822_ITPR1_NM_+|	10	-4,40	1,6	2,7	6,56E-03	8,91E-02	0	0	0	0	3	7	16	20	18	16	25	13	#DIV/0!	30	-Inf	0,01	-Inf	ITPR1	chr3:4780009:+	chr3_4738235_+;chr3_4738323_+	uc003bqc.3:4558175:4887909:+;uc021wsi.1:4558175:4887909:+;uc021wsj.1:4558175:4887909:+;uc011asu.2:4558175:4887909:+
chr8:99656960-99657022:mpeak_72703|chr8_99468228_99954799_STK3_NM_-|	44	-4,42	1,4	3,1	2,08E-03	4,36E-02	0	0	1	0	5	7	115	91	125	59	86	40	1	10	-4,03	0,84	-4,87	STK3	-	-	uc003yip.4:99468069:99837768:-;uc010mbm.2:99468069:99837768:-;uc003yio.4:99468069:99895984:-
chr6:43324628-43324684:mpeak_64594|chr6_43308240_43337181_ZNF318_NM_-|	62	-4,42	1,4	3,1	2,15E-03	4,43E-02	0	0	0	5	3	10	114	102	71	138	218	85	#DIV/0!	4	-Inf	-0,62	-Inf	ZNF318	chr6:43324628:-	chr6_43356891_-	uc003oux.3:43304895:43337103:-
chr1:61579727-61579777:mpeak_2567|chr1_61542945_61920974_NFIA_NM_+|	95	-4,42	1,7	2,7	8,03E-03	1,01E-01	0	0	0	0	0	11	192	223	156	157	252	153	#DIV/0!	6	-Inf	0,02	-Inf	NFIA	-	-	uc001czy.3:61543297:61920992:+;uc010oos.2:61547615:61920992:+;uc001czw.3:61548463:61920992:+;uc001czv.3:61548463:61921051:+
chr14:76151280-76151338:mpeak_23810|chr14_76127550_76420766_TTLL5_NM_+|	26	-4,44	1,6	2,8	5,69E-03	8,22E-02	0	0	0	0	9	3	30	50	69	28	70	56	#DIV/0!	12	-Inf	-0,05	-Inf	TTLL5	-	chr14_75684995_+	uc001xrw.2:76129492:76175591:+;uc010ask.2:76129492:76353103:+;uc001xrx.3:76129492:76420789:+
chr3:196225432-196225489:mpeak_55193|chr3_196199643_196230639_RNF168_NM_-|	15	-4,45	1,9	2,4	1,76E-02	1,57E-01	0	0	0	1	0	16	21	26	19	26	37	36	#DIV/0!	26	-Inf	-0,57	-Inf	RNF168	chr3:196225430:-	chr3_196498561_-	uc003fwq.3:196198689:196230044:-
chr10:43599674-43599802:mpeak_8964|chr10_43572516_43623559_RET_NM_+|	30	-4,47	1,4	3,1	1,98E-03	4,24E-02	0	0	0	8	8	6	37	34	53	66	35	114	#DIV/0!	10	-Inf	-0,79	-Inf	RET	-	chr10_43104297_+	uc001jak.1:43572706:43622202:+;uc001jal.3:43572706:43623717:+
chr13:100912348-100912405:mpeak_21611|chr13_100741268_101182351_PCCA_NM_+|	14	-4,48	1,6	2,7	6,25E-03	8,66E-02	0	0	0	1	3	15	24	23	10	32	35	26	#DIV/0!	21	-Inf	-0,71	-Inf	PCCA	chr13:100912407:+	chr13_100260144_+	uc001voo.3:100741374:101182420:+;uc010aga.3:100741374:101182420:+;uc010tiz.2:100741374:101182420:+
chr17:35910600-35910655:mpeak_32652|chr17_35879174_35969486_SYNRG_NM_-mpeak_32652|chr17_35879174_35969486_SYNRG_NM_-||	122	-4,52	1,4	3,3	9,67E-04	2,98E-02	0	0	0	5	10	2	210	239	172	226	346	256	#DIV/0!	2	-Inf	-0,42	-Inf	SYNRG	chr17:35910602:-	chr17_37550503_-	uc010wde.2:35879042:35969403:-;uc002hoa.3:35879042:35969403:-;uc010wdf.2:35879042:35969403:-;uc002hoc.3:35879042:35969403:-;uc002hoe.3:35879042:35969403:-;uc002hod.3:35879042:35969403:-;uc010wdg.2:35879042:35969403:-;uc002hob.3:35879042:35969403:-;uc002hof.3:35902065:35936475:-
chr3:15276754-15276805:mpeak_50967|chr3_15247732_15292622_CAPN7_NM_+|	98	-4,54	1,6	2,8	4,47E-03	7,02E-02	0	0	0	1	0	11	171	238	157	193	260	144	#DIV/0!	3	-Inf	-0,07	-Inf	CAPN7	-	chr3_15235321_+	uc003bzn.3:15248002:15292767:+
chr17:80378383-80378433:mpeak_35261|chr17_80376251_80400052_HEXDC_NM_+|	9	-4,54	1,8	2,5	1,40E-02	1,40E-01	0	0	0	5	5	3	2	19	25	4	15	29	#DIV/0!	29	-Inf	-0,05	-Inf	HEXDC	chr17:80378435:+	chr17_82420562_+	uc002kev.4:80377675:80400468:+;uc002kew.3:80377675:80400260:+
chr3:9985750-9985811:mpeak_50691|chr3_9975523_9986048_CRELD1_NM_+|	38	-4,55	1,5	3,0	2,92E-03	5,43E-02	0	0	0	0	3	9	48	68	102	58	82	80	#DIV/0!	8	-Inf	-0,01	-Inf	CRELD1	chr3:9985801:+	chr3_9944115_+	uc003buh.3:9976122:9986263:+;uc003buf.3:9976122:9986075:+;uc003bug.3:9976122:9986263:+
chr4:109572180-109572290:mpeak_57478|chr4_109571740_109588402_OSTC_NM_+|	837	-4,57	1,3	3,6	3,78E-04	1,89E-02	1	0	0	7	8	3	1984	1843	2107	1200	1440	1445	0	0	-3,99	0,54	-4,53	OSTC	chr4:109572233:+	chr4_108651074_+;chr4_108651142_+	uc031sgt.1:109571811:109588413:+;uc003hzb.2:109571811:109588421:+;uc031sgu.1:109571811:109588421:+
chr3:196287680-196287730:mpeak_55196|chr3_196281678_196295413_WDR53_NM_-|	4	-4,58	1,8	2,5	1,27E-02	1,31E-01	0	0	0	4	3	13	2	5	3	7	5	4	#DIV/0!	127	-Inf	-0,63	-Inf	WDR53	chr3:196287690:-	chr3_196560809_-	uc003fwt.3:196281081:196288346:-
chr10:104937876-104937926:mpeak_10730|chr10_104849665_104953063_NT5C2_NM_-|	118	-4,58	1,7	2,7	6,04E-03	8,45E-02	0	0	0	0	0	12	223	221	260	223	204	270	#DIV/0!	5,20	-Inf	0,02	-Inf	NT5C2	-	-	-
chr16:14029876-14030028:mpeak_28256|chr16_14014013_14041470_ERCC4_NM_+|	12	-4,60	1,7	2,7	7,36E-03	9,48E-02	0	0	0	3	15	9	19	16	2	20	25	30	#DIV/0!	37	-Inf	-1,00	-Inf	ERCC4	chr16:14029946:+;chr16:14030043:+	chr16_13936106_+	uc010uyz.1:14029139:14042204:+;uc002dce.2:14014022:14042204:+
chr4:119673801-119673871:mpeak_57630|chr4_119644810_119757326_SEC24D_NM_-|	64	-4,60	1,4	3,3	1,08E-03	3,12E-02	0	0	0	4	5	5	110	180	72	95	170	124	#DIV/0!	4	-Inf	-0,10	-Inf	SEC24D	chr4:119673818:-	-	uc003ici.4:119644669:119754851:-;uc003icj.4:119644669:119754851:-
chr3:121552764-121552887:mpeak_53142|chr3_121489421_121553926_IQCB1_NM_-|	21	-4,61	1,5	3,0	2,60E-03	5,06E-02	0	0	0	0	6	9	22	50	36	38	52	36	#DIV/0!	18	-Inf	-0,20	-Inf	IQCB1	-	-	-
chr10:3124103-3124157:mpeak_8031|chr10_3109711_3178641_PFKP_NM_+|	1062	-4,62	1,5	3,1	2,14E-03	4,42E-02	0	0	0	0	1	9	1988	1852	3065	1435	1894	2495	#DIV/0!	0	-Inf	0,25	-Inf	PFKP	chr10:3124159:+	chr10_3081965_+	uc001igp.3:3109787:3178771:+;uc001igq.3:3111573:3178771:+
chr2:3394639-3394735:mpeak_40080|chr2_3383445_3482989_TRAPPC12_NM_+|	38	-4,63	1,5	3,1	2,21E-03	4,49E-02	0	0	0	0	8	9	48	42	101	66	95	90	#DIV/0!	10	-Inf	-0,40	-Inf	TRAPPC12	chr2:3394694:+;chr2:3394740:+	chr2_3390958_+;chr2_3390995_+	uc002qxm.1:3391394:3483232:+;uc002qxn.1:3391394:3483232:+;uc010ewm.1:3391394:3488649:+
chr11:66832093-66832158:mpeak_13624|chr11_66824288_66838905_RHOD_NM_+|	64	-4,64	1,3	3,6	3,76E-04	1,89E-02	1	0	0	5	5	8	153	164	127	93	98	115	1	6	-3,99	0,53	-4,52	RHOD	-	-	uc001ojv.3:66824373:66839073:+
chr1:220929104-220929194:mpeak_7183|chr1_220921675_220957260_MARC2_NM_+|	12	-4,64	1,6	2,9	4,13E-03	6,64E-02	0	0	0	3	2	9	15	15	35	23	14	27	#DIV/0!	20	-Inf	0,01	-Inf	MARC2	chr1:220929197:+	chr1_220755872_+	uc001hmq.3:220921873:220955243:+;uc001hmr.3:220921873:220955243:+;uc009xdx.3:220921873:220957284:+
chr7:2239143-2239195:mpeak_67101|chr7_1855864_2272583_MAD1L1_NM_-|	36	-4,67	1,4	3,3	8,53E-04	2,80E-02	0	0	0	14	7	5	72	47	35	92	66	96	#DIV/0!	10	-Inf	-0,72	-Inf	MAD1L1	chr7:2239138:-	-	uc003sle.1:1855705:2255630:-;uc003slh.1:1855705:2269768:-;uc003slf.1:1855705:2269768:-;uc003slg.1:1855705:2269768:-;uc010ksh.1:1855705:2269768:-;uc003sli.1:1855705:2262265:-;uc010ksi.1:1914141:2269768:-;uc010ksj.3:1937763:2269768:-
chr5:167843458-167843537:mpeak_62364|chr5_167719064_167895955_WWC1_NM_+|	117	-4,68	1,4	3,2	1,21E-03	3,33E-02	0	0	0	11	0	7	274	169	185	246	275	234	#DIV/0!	4	-Inf	-0,26	-Inf	WWC1	chr5:167843521:+	chr5_168416521_+	uc003lzw.3:167833215:167896022:+;uc003lzv.3:167719157:167896022:+;uc011den.2:167719157:167896022:+;uc003lzu.3:167719157:167896022:+
chr19:48978350-48978412:mpeak_39234|chr19_48972464_48982379_CYTH2_NM_+|	150	-4,68	1,4	3,5	5,40E-04	2,11E-02	0	0	0	5	7	3	226	263	379	219	358	336	#DIV/0!	2	-Inf	-0,07	-Inf	CYTH2	chr19:48978402:+	chr19_48475147_+;chr19_48475172_+	uc002pjj.4:48972764:48982467:+
chr3:11488352-11488413:mpeak_50769|chr3_11314009_11596284_ATG7_NM_+|	51	-4,70	1,6	2,8	4,40E-03	6,97E-02	0	0	0	4	10	0	79	79	149	72	68	155	#DIV/0!	7	-Inf	0,06	-Inf	ATG7	chr3:11488410:+	chr3_11446935_+	uc003bwc.3:11340169:11596317:+;uc003bwd.3:11340169:11596317:+;uc011aum.2:11340169:11596317:+
chr1:115290976-115291036:mpeak_3940|chr1_115260837_115300671_CSDE1_NM_-|	11712	-4,70	1,3	3,6	2,90E-04	1,72E-02	0	0	1	0	8	6	32245	30525	26683	17263	17095	16718	0	0	-4,33	0,81	-5,14	CSDE1	-	chr1_114748309_-	-
chr10:22094484-22094536:mpeak_8529|chr10_22045684_22292650_DNAJC1_NM_-|	134	-4,73	1,4	3,4	6,53E-04	2,37E-02	0	0	0	7	7	3	157	387	233	246	295	270	#DIV/0!	2	-Inf	-0,06	-Inf	DNAJC1	chr10:22094482:-	chr10_21805546_-	uc001irc.3:22045615:22292363:-
chr16:70575338-70575391:mpeak_30010|chr16_70557690_70605575_SF3B3_NM_+|	1530	-4,77	1,5	3,1	1,75E-03	3,89E-02	0	0	0	3	0	14	2513	2609	3337	3332	3357	3200	#DIV/0!	0	-Inf	-0,23	-Inf	SF3B3	-	chr16_70541487_+	uc002ezf.3:70560559:70605716:+
chr3:125027637-125027696:mpeak_53305|chr3_124952783_125094198_ZNF148_NM_-|	116	-4,79	1,7	2,8	4,86E-03	7,33E-02	0	0	0	0	1	13	294	283	115	181	331	173	#DIV/0!	3	-Inf	0,01	-Inf	ZNF148	chr3:125027642:-	chr3_125308802_-	uc003ehx.4:124951184:125032484:-;uc003ehz.4:124951184:125032484:-;uc010hsa.3:124951184:125032484:-;uc003eia.4:124951184:125032484:-
chr19:11146047-11146104:mpeak_37316|chr19_11071597_11172459_SMARCA4_NM_+|	681	-4,81	1,3	3,7	2,48E-04	1,53E-02	0	0	0	3	4	7	1125	1634	1481	1446	1124	1347	#DIV/0!	0	-Inf	0,11	-Inf	SMARCA4	chr19:11146102:+	chr19_11035421_+	uc010dxo.3:11094827:11172492:+;uc010dxp.3:11094827:11172492:+;uc002mqf.4:11094827:11172492:+;uc010dxq.3:11094827:11172492:+;uc010dxr.3:11094827:11172492:+;uc002mqj.4:11094827:11172492:+;uc010dxs.3:11094827:11172492:+;uc002mqh.4:11132415:11172492:+
chr10:98667413-98667486:mpeak_10329|chr10_98592016_98714709_LCOR_NM_+|	37	-4,86	1,7	2,9	3,27E-03	5,77E-02	0	0	0	12	6	0	94	60	53	85	89	42	#DIV/0!	13	-Inf	-0,05	-Inf	LCOR	-	-	-
chr15:45966097-45966214:mpeak_25539|chr15_45923345_45983170_SQRDL_NM_+|	109	-4,87	1,4	3,5	5,13E-04	2,09E-02	0	0	0	0	3	9	237	203	249	162	195	251	#DIV/0!	3	-Inf	0,18	-Inf	SQRDL	chr15:45966215:+	chr15_45673966_+;chr15_45674016_+	uc001zvu.4:45951121:45983228:+;uc001zvv.4:45951121:45983228:+
chr16:58077706-58077756:mpeak_29538|chr16_58059281_58078910_MMP15_NM_+|	66	-4,89	1,6	3,1	1,72E-03	3,85E-02	0	0	0	3	0	9	94	133	215	103	96	143	#DIV/0!	5,32	-Inf	0,38	-Inf	MMP15	chr16:58077757:+	chr16_58043852_+	uc002ena.3:58060254:58079350:+
chr1:11192570-11192714:mpeak_535|chr1_11167557_11322608_MTOR_NM_-|	155	-4,90	1,4	3,5	5,18E-04	2,09E-02	0	0	0	5	6	5	188	489	270	303	404	193	#DIV/0!	2	-Inf	0,07	-Inf	MTOR	chr1:11192569:-	chr1_11132576_-	uc001asd.3:11167541:11319466:-
chr16:4890973-4891061:mpeak_28002|chr16_4855311_4897303_GLYR1_NM_-|	171	-4,91	1,4	3,5	4,17E-04	1,99E-02	0	0	0	1	9	2	287	396	465	339	247	306	#DIV/0!	1	-Inf	0,36	-Inf	GLYR1	chr16:4891010:-	chr16_4841010_-	uc002cxx.4:4855236:4897266:-;uc002cya.2:4855236:4897266:-;uc010uxv.1:4855236:4897266:-
chr1:114267373-114267430:mpeak_3808|chr1_114240347_114301777_PHTF1_NM_-|	5	-4,93	2,3	2,2	2,88E-02	2,09E-01	0	0	0	3	9	5	0	23	2	8	13	3	#DIV/0!	69	-Inf	0,04	-Inf	PHTF1	-	-	uc009wgp.1:114240326:114301325:-;uc001edn.3:114246678:114301325:-
chr5:128798172-128798222:mpeak_61164|chr5_128796102_129072759_ADAMTS19_NM_+|	40	-4,93	1,5	3,3	1,05E-03	3,08E-02	0	0	0	0	3	9	90	116	53	86	52	64	#DIV/0!	9	-Inf	0,35	-Inf	ADAMTS19	-	-	uc003kvb.1:128796102:129072911:+
chr4:78830408-78830460:mpeak_56882|chr4_78783804_78873642_MRPL1_NM_+|	65	-4,93	1,5	3,2	1,43E-03	3,50E-02	0	0	0	3	0	11	129	142	138	127	145	87	#DIV/0!	6	-Inf	0,19	-Inf	MRPL1	-	chr4_77909288_+;chr4_77909306_+	uc003hku.2:78784002:78873761:+
chr4:2908413-2908495:mpeak_55581|chr4_2845583_2929897_ADD1_NM_+|	170	-4,96	1,5	3,4	6,88E-04	2,45E-02	0	0	0	15	1	5	255	313	410	349	256	440	#DIV/0!	2	-Inf	-0,10	-Inf	ADD1	chr4:2908484:+	chr4_2906756_+	uc003gfo.3:2877642:2929898:+;uc003gfp.3:2877642:2929898:+;uc003gfq.3:2877642:2930250:+;uc003gfr.3:2877642:2930250:+;uc003gfs.3:2877642:2929898:+
chr16:84691528-84691584:mpeak_30500|chr16_84682116_84695183_KLHL36_NM_+|	338	-4,96	1,4	3,6	3,04E-04	1,75E-02	0	0	0	0	12	9	714	481	582	913	627	723	#DIV/0!	1	-Inf	-0,35	-Inf	KLHL36	chr16:84691585:+	chr16_84657978_+	uc002fig.3:84684473:84695739:+;uc010chl.3:84684476:84695739:+
chr5:32592921-32593006:mpeak_59145|chr5_32585604_32601110_SUB1_NM_+|	456	-4,99	1,7	3,0	2,57E-03	5,02E-02	0	0	0	0	0	12	862	1430	839	722	795	808	#DIV/0!	2	-Inf	0,43	-Inf	SUB1	-	chr5_32592871_+	uc003jhs.2:32588618:32601190:+
chr15:41818938-41818999:mpeak_25228|chr15_41809889_41836475_RPAP1_NM_-|	51	-5,00	1,4	3,6	3,07E-04	1,75E-02	0	0	0	9	3	7	58	106	119	103	81	126	#DIV/0!	7	-Inf	-0,13	-Inf	RPAP1	chr15:41818940:-	chr15_41526744_-;chr15_41526766_-	uc001zod.3:41809739:41829323:-
chr8:23293047-23293105:mpeak_71090|chr8_23290667_23315244_ENTPD4_NM_-|	50	-5,02	1,4	3,6	3,71E-04	1,89E-02	0	0	0	0	4	7	125	92	129	74	106	67	#DIV/0!	7	-Inf	0,48	-Inf	ENTPD4	chr8:23293052:-	chr8_23435539_-	uc011kzu.1:23243443:23307413:-;uc003xdl.3:23290438:23307413:-;uc003xdm.3:23290438:23307413:-;uc011kzv.1:23291825:23307413:-
chr1:117493898-117493948:mpeak_4033|chr1_117452544_117529422_PTGFRN_NM_+|	525	-5,02	1,3	3,7	1,91E-04	1,32E-02	0	0	0	3	3	7	1228	969	1497	827	704	1061	#DIV/0!	0	-Inf	0,51	-Inf	PTGFRN	-	chr1_116951327_+	uc001egv.1:117452825:117529589:+
chr3:14697049-14697146:mpeak_50913|chr3_14693252_14712402_CCDC174_NM_+|	11	-5,04	1,5	3,3	1,01E-03	3,04E-02	0	0	0	11	8	13	19	13	5	14	25	23	#DIV/0!	52	-Inf	-0,75	-Inf	CCDC174	-	chr3_14655546_+;chr3_14655621_+	uc010hei.1:14693343:14708495:+;uc003byw.3:14693343:14712701:+
chr14:58988587-58988647:mpeak_23045|chr14_58894102_59014498_KIAA0586_NM_+|	9	-5,05	1,8	2,8	5,28E-03	7,80E-02	0	0	0	7	0	9	9	25	16	20	12	10	#DIV/0!	55	-Inf	0,26	-Inf	KIAA0586	-	-	uc010trt.2:58909433:59003759:+;uc010trr.2:58894346:59014694:+;uc001xdt.4:58896136:59014650:+;uc001xdu.4:58895027:59014650:+;uc010trs.2:58896136:59014650:+;uc001xdv.4:58894982:59014650:+
chr20:46390212-46390264:mpeak_47328|chr20_46287136_46415360_SULF2_NM_-|	611	-5,05	1,3	3,8	1,52E-04	1,19E-02	0	0	0	8	6	3	1164	1055	1673	1135	899	1386	#DIV/0!	1	-Inf	0,19	-Inf	SULF2	-	chr20_47761470_-	-
chr6:125615407-125615462:mpeak_65882|chr6_125597389_125623282_HDDC2_NM_-|	63	-5,06	1,4	3,5	4,01E-04	1,95E-02	0	0	0	1	7	5	92	229	97	105	105	108	#DIV/0!	4	-Inf	0,39	-Inf	HDDC2	chr6:125615409:-	chr6_125294247_-;chr6_125294290_-	uc003qaa.1:125597291:125623078:-
chr5:128798441-128798492:mpeak_61165|chr5_128796102_129072759_ADAMTS19_NM_+|	40	-5,07	1,5	3,3	8,95E-04	2,89E-02	0	0	0	0	3	10	90	116	53	86	52	64	#DIV/0!	10	-Inf	0,35	-Inf	ADAMTS19	-	-	uc003kvb.1:128796102:129072911:+
chr10:3183606-3183665:mpeak_8044|chr10_3180316_3215033_PITRM1_NM_-|	233	-5,09	1,4	3,7	2,17E-04	1,40E-02	0	0	0	8	0	6	485	476	674	347	380	418	#DIV/0!	2	-Inf	0,51	-Inf	PITRM1	chr10:3183607:-	chr10_3141426_-	uc001igr.2:3181000:3214964:-;uc009xhv.2:3180222:3214964:-;uc001igt.2:3180222:3214964:-;uc010qah.2:3180222:3214971:-;uc001igu.1:3180428:3214405:-;uc010qai.2:3180428:3212396:-
chr16:12004456-12004509:mpeak_28223|chr16_11967028_12010519_GSPT1_NM_-|	612	-5,10	1,3	4,0	7,34E-05	7,93E-03	0	0	0	3	6	5	1341	1451	1453	1024	1076	981	#DIV/0!	0	-Inf	0,46	-Inf	GSPT1	-	chr16_11910599_-	uc002dbu.3:11966975:12009577:-;uc002dbt.3:11966975:12009577:-
chr11:43423103-43423174:mpeak_12518|chr11_43380434_43515322_TTC17_NM_+|	96	-5,10	1,4	3,7	2,10E-04	1,39E-02	0	1	0	0	9	7	284	182	304	122	132	106	0	7	-3,67	1,10	-4,77	TTC17	chr11:43423172:+	chr11_43401622_+	uc001mxj.3:43418285:43467515:+;uc010rfj.2:43400794:43515454:+;uc001mxh.3:43380504:43467515:+;uc001mxi.3:43380504:43515454:+
chr9:37884743-37884844:mpeak_74642|chr9_37880745_37904350_SLC25A51_NR_-|	8	-5,16	1,7	3,0	2,83E-03	5,38E-02	0	0	0	0	6	7	14	13	19	8	7	17	#DIV/0!	63	-Inf	0,52	-Inf	SLC25A51	chr9:37884742:-	-	-
chr8:15533676-15533727:mpeak_70870|chr8_15397595_15621711_TUSC3_NM_+|	103	-5,18	1,5	3,6	3,82E-04	1,89E-02	0	0	0	4	0	9	204	337	197	174	161	146	#DIV/0!	4	-Inf	0,61	-Inf	TUSC3	chr8:15533759:+	chr8_15676234_+	uc003wwt.3:15397939:15615318:+;uc003wwu.3:15397939:15621727:+
chr20:47592959-47593012:mpeak_47380|chr20_47538274_47649559_ARFGEF2_NM_+|	58	-5,21	1,4	3,7	1,85E-04	1,32E-02	0	0	0	1	3	11	128	140	108	103	85	118	#DIV/0!	5,05	-Inf	0,30	-Inf	ARFGEF2	chr20:47593008:+	-	uc002xtx.4:47538426:47649736:+
chr6:88313293-88313438:mpeak_65291|chr6_88299784_88376735_ORC3_NM_+|	9	-5,22	1,6	3,2	1,38E-03	3,46E-02	0	0	0	1	3	10	13	19	23	11	15	13	#DIV/0!	36	-Inf	0,50	-Inf	ORC3	chr6:88313344:+;chr6:88313433:+	chr6_87603714_+	uc011dzl.2:88299886:88366766:+;uc011dzm.2:88299886:88366766:+;uc003pmg.3:88299886:88376841:+;uc003pmh.3:88299886:88376841:+
chr12:32491037-32491094:mpeak_16319|chr12_32260184_32530473_BICD1_NM_+|	6	-5,24	1,7	3,1	1,70E-03	3,85E-02	0	0	0	5	6	3	5	18	13	5	8	9	#DIV/0!	63	-Inf	0,65	-Inf	BICD1	chr12:32491096:+	-	uc001rku.3:32260265:32530561:+;uc001rkv.3:32260265:32520651:+
chr1:198127033-198127083:mpeak_6422|chr1_198126107_198288541_NEK7_NM_+|	10	-5,24	1,8	2,8	4,42E-03	6,98E-02	0	0	0	0	3	8	22	40	8	7	13	20	#DIV/0!	43	-Inf	0,83	-Inf	NEK7	-	-	-
chr4:84519838-84519887:mpeak_57005|chr4_84457066_84525820_AGPAT9_NM_+|	26	-5,30	1,5	3,6	3,43E-04	1,82E-02	0	0	0	4	9	9	59	18	60	57	55	35	#DIV/0!	16	-Inf	-0,10	-Inf	AGPAT9	-	-	uc003hoy.4:84457775:84525920:+;uc003how.4:84457775:84525920:+;uc003hox.4:84457775:84525920:+
chr12:32340393-32340451:mpeak_16315|chr12_32260184_32530473_BICD1_NM_+|	6	-5,30	1,8	2,9	3,55E-03	5,99E-02	0	0	0	3	10	1	5	18	13	5	8	9	#DIV/0!	63	-Inf	0,65	-Inf	BICD1	-	-	uc001rku.3:32260265:32530561:+;uc001rkv.3:32260265:32520651:+
chr8:141466609-141466663:mpeak_73536|chr8_140743471_141468678_TRAPPC9_NM_-|	232	-5,32	1,4	3,8	1,74E-04	1,31E-02	0	0	0	0	10	5	396	516	704	324	313	511	#DIV/0!	2	-Inf	0,49	-Inf	TRAPPC9	chr8:141466612:-	chr8_140456514_-	uc003yvh.2:140743303:141468663:-
chr19:287100-287216:mpeak_36528|chr19_281537_291435_PPAP2C_NM_-|	187	-5,34	1,4	3,9	1,12E-04	1,06E-02	0	0	0	0	8	12	351	315	457	324	342	439	#DIV/0!	3	-Inf	0,02	-Inf	PPAP2C	chr19:287099:-;chr19:287161:-	chr19_287163_-	uc002loh.3:281387:291066:-;uc002loi.3:281387:291336:-;uc002loj.3:281387:288055:-
chr11:73059776-73059828:mpeak_13993|chr11_73019662_73078628_ARHGEF17_NM_+|	42	-5,36	1,4	3,8	1,30E-04	1,12E-02	0	0	0	4	8	12	62	48	116	93	75	84	#DIV/0!	10	-Inf	-0,16	-Inf	ARHGEF17	chr11:73059832:+	-	uc001otu.3:73019683:73078825:+
chr14:74331384-74331441:mpeak_23652|chr14_74318533_74350803_PTGR2_NM_+|	16	-5,37	1,5	3,7	2,16E-04	1,40E-02	0	0	0	8	3	8	36	31	27	16	30	29	#DIV/0!	25	-Inf	0,35	-Inf	PTGR2	chr14:74331440:+	chr14_73864731_+	uc001xow.3:74325565:74350880:+;uc010tue.2:74325565:74350880:+;uc001xox.3:74325565:74350880:+
chr5:128869040-128869096:mpeak_61169|chr5_128796102_129072759_ADAMTS19_NM_+|	40	-5,38	1,5	3,6	2,88E-04	1,72E-02	0	0	0	3	3	12	90	116	53	86	52	64	#DIV/0!	9	-Inf	0,35	-Inf	ADAMTS19	chr5:128869091:+	-	uc003kvb.1:128796102:129072911:+
chr8:95523201-95523263:mpeak_72508|chr8_95501088_95565746_KIAA1429_NM_-|	106	-5,39	1,4	3,9	1,05E-04	1,00E-02	0	0	0	14	7	9	118	302	143	292	201	183	#DIV/0!	4	-Inf	-0,26	-Inf	KIAA1429	chr8:95523206:-	-	uc003ygo.2:95500933:95565675:-
chr1:62300163-62300219:mpeak_2591|chr1_62208148_62626579_INADL_NM_+|	16	-5,41	2,0	2,8	5,87E-03	8,39E-02	0	0	0	0	0	13	40	38	38	20	31	14	#DIV/0!	58	-Inf	0,82	-Inf	INADL	chr1:62300219:+	-	uc009waf.1:62228564:62579916:+;uc001daa.2:62228564:62579922:+;uc001dad.3:62253485:62579922:+;uc001dab.3:62228564:62626607:+
chr16:21613193-21613251:mpeak_28585|chr16_21608541_21666547_METTL9_NM_+|	140	-5,45	1,7	3,2	1,24E-03	3,38E-02	0	0	0	0	0	13	374	400	294	174	237	193	#DIV/0!	6	-Inf	0,82	-Inf	METTL9	-	-	uc002dje.3:21611054:21666753:+;uc002djf.3:21611054:21666753:+
chr16:11030697-11030748:mpeak_28133|chr16_11023416_11036257_DEXI_NM_-|	118	-5,47	1,3	4,1	3,51E-05	4,75E-03	0	0	0	4	8	9	262	281	195	224	167	267	#DIV/0!	3	-Inf	0,17	-Inf	DEXI	chr16:11030696:-	chr16_10936840_-	-
chr4:153451419-153451582:mpeak_58153|chr4_153244301_153456393_FBXW7_NM_-|	47	-5,49	1,4	3,9	8,92E-05	8,98E-03	0	0	0	12	14	22	56	64	55	62	185	89	#DIV/0!	14	-Inf	-0,94	-Inf	FBXW7	chr4:153451417:-;chr4:153451446:-;chr4:153451520:-	chr4_152530274_-;chr4_152530366_-	-
chr16:81092994-81093051:mpeak_30377|chr16_81087699_81110872_C16orf46_NM_-|	17	-5,51	1,6	3,5	5,09E-04	2,09E-02	0	0	0	1	4	17	31	39	23	28	34	23	#DIV/0!	26	-Inf	0,13	-Inf	C16orf46	chr16:81092997:-	chr16_81059395_-	uc010chf.3:81087675:81097560:-
chr4:123833703-123833781:mpeak_57712|chr4_123814380_123844159_NUDT6_NM_-|	4	-5,54	2,1	2,7	6,97E-03	9,20E-02	0	0	0	3	10	7	1	9	6	3	1	8	#DIV/0!	169	-Inf	0,44	-Inf	NUDT6	chr4:123833700:-	-	uc003iew.3:123813982:123843727:-
chr12:32485943-32486004:mpeak_16318|chr12_32260184_32530473_BICD1_NM_+|	7	-5,93	1,7	3,5	5,33E-04	2,10E-02	0	0	0	14	7	3	5	18	13	5	8	9	#DIV/0!	102	-Inf	0,65	-Inf	BICD1	chr12:32485999:+	chr12_32333064_+	uc001rku.3:32260265:32530561:+;uc001rkv.3:32260265:32520651:+
chr2:86396439-86396494:mpeak_42286|chr2_86372004_86422893_IMMT_NM_-|	290	-6,06	1,3	4,5	6,21E-06	1,37E-03	0	0	0	3	9	17	523	704	665	474	453	626	#DIV/0!	2	-Inf	0,29	-Inf	IMMT	chr2:86396436:-	chr2_86169316_-	uc002sre.3:86386439:86422505:-;uc010fgs.1:86386658:86422505:-;uc010ytf.1:86386658:86422505:-;uc002sqz.4:86371390:86422505:-;uc002srb.4:86371390:86422505:-;uc002sra.4:86371390:86422505:-;uc010ytd.2:86371390:86422505:-;uc010yte.2:86371390:86422505:-
chr21:44268148-44268264:mpeak_48741|chr21_44263391_44299699_WDR4_NM_-|	169	-6,06	1,3	4,7	2,16E-06	7,13E-04	0	0	0	14	29	24	249	181	266	393	435	433	#DIV/0!	5,27	-Inf	-0,86	-Inf	WDR4	chr21:44268151:-;chr21:44268201:-	chr21_42848121_-	-
