# Supplementary material for: Compartment-specific and ELAVL1-coordinated regulation of intronic polyadenylation isoforms by doxorubicin
Source: HighWire-hosted journal article supplement (doi:10.1101/gr.276192.121), 2022-07-01
Supplement: Supplemental_Table_S3.xlsx.xlsx [file Supplemental_Table_S3.xlsx.xlsx]

## Sheet: Sheet1
			Supplemental Table S3 : List of annotated IPA isoforms regulated by 6-hour doxorubicin in MCF-7 cell nuclei by 3’-seq analysis.
IPA peaks	baseMean	log2FoldChange IPA:LE	lfcSE	stat	pvalue	padj	49	61	73	48	60	72	LE,49	LE,61	LE,73	LE,48	LE,60	LE,72	%IPA (+doxo)	%IPA (-doxo)	log2FC_IPA	log2FC_LE	log2FC IPA-logFC LE	gene	Tian polyA site	Zavolan polyA site
chr3:52524386-52524496:mpeak_124358|chr3_52489523_52525887_NISCH_NM_+|	45.2046	5.46829	1.37022	-3.99081	6.58478e-05	0.00564227	20.0601	6.54194	8.02703	0	0	0	104.93	96.9396	93.3142	76.5254	82.0015	54.1155	11.7314	#DIV/0!	Inf	0.473182	Inf	NISCH	chr3:52524494:+	-
chr3:130399363-130399542:mpeak_128591|chr3_130398329_130465696_PIK3R4_NM_-|	44.1927	4.99592	1.35309	-3.69224	0.00022229	0.0102534	7.71541	7.73138	11.0372	0	0	0	131.162	103.482	74.25	62.6117	66.0789	66.2449	8.57381	#DIV/0!	Inf	0.664113	Inf	PIK3R4	chr3:130399364:-	chr3_130680521_-
chr17:64302390-64302616:mpeak_83295|chr17_64298925_64799990_PRKCA_NM_+|	42.173	2.58266	0.768958	-3.35865	0.000783245	0.0202597	75.611	103.482	196.662	22.03	27.0685	20.5266	13.8877	8.3261	7.02365	10.4353	7.96132	13.0624	1285.18	221.32	2.43211	-0.105651	2.53776	PRKCA	chr17:64302460:+	-
chr5:65908532-65908619:mpeak_145259|chr5_65892175_66458974_MAST4_NM_+|	57.7627	2.33767	0.736031	-3.17605	0.00149297	0.0280557	16.9739	29.7361	27.0912	3.47843	6.36905	14.9284	74.0679	99.3185	47.1588	118.266	151.265	104.499	33.4631	6.62403	1.57471	-0.762081	2.33679	MAST4	-	chr5_66612761_+
chr22:34215414-34215552:mpeak_119217|chr22_33670610_34316416_LARGE_NM_-|	24.4249	4.87804	1.54227	-3.1629	0.00156208	0.0286157	1.54308	4.16305	10.0338	0	0.796132	0	57.094	21.41	19.0642	105.512	50.1563	23.3257	16.1322	1.33434	4.30528	-0.87543	5.18071	LARGE	-	chr22_33819435_-
chr17:79084200-79084320:mpeak_84958|chr17_79008946_79089569_BAIAP2_NM_+|	41.4298	3.00523	0.962337	-3.12285	0.00179112	0.0308171	135.791	85.0452	136.459	26.6679	20.6994	9.33026	26.2324	8.3261	3.01014	24.349	17.5149	3.7321	951.048	124.348	2.65576	-0.279378	2.93514	BAIAP2	chr17:79084221:+;chr17:79084274:+;chr17:79084313:+	chr17_81110481_+;chr17_81110512_+
chr12:26815029-26815203:mpeak_39136|chr12_26492416_26986131_ITPR2_NM_-|	35.7662	2.57818	0.835367	-3.08629	0.00202672	0.0328906	27.7755	42.82	71.2399	0	8.75745	4.66513	61.7233	57.688	52.1757	37.1032	43.7872	21.4596	82.6609	19.6716	3.40148	0.745428	2.65605	ITPR2	-	chr12_26662217_-
chr4:148768297-148768377:mpeak_140850|chr4_148653452_148993143_ARHGAP10_NM_+|	53.8683	1.88499	0.611061	-3.08478	0.00203704	0.0329165	143.507	105.266	105.355	28.9869	27.0685	45.7183	37.034	28.5466	27.0912	37.1032	37.4182	23.3257	382.13	104.013	1.7989	-0.0783975	1.8773	ARHGAP10	-	chr4_147847218_+
chr16:8900185-8900268:mpeak_68585|chr16_8891669_8941580_PMM2_NM_+|	76.7757	2.68424	0.89865	-2.98696	0.00281763	0.0386599	100.3	31.5203	40.1351	27.8274	5.57292	27.0578	111.102	56.4986	44.1487	270.158	120.216	86.7714	81.2073	12.6708	1.50803	-1.17207	2.6801	PMM2	chr16:8900264:+	chr16_8806382_+;chr16_8806407_+
chr3:160665426-160665572:mpeak_131040|chr3_160473995_160786598_PPM1L_NM_+|	13.339	3.29106	1.14264	-2.88022	0.00397398	0.0467848	60.1802	26.7625	19.0642	13.9137	7.16518	7.46421	4.62925	1.78417	1.00338	11.5948	5.57292	0.933026	1429.28	157.691	1.89294	-1.28718	3.18012	PPM1L	-	chr3_160947688_+;chr3_160947784_+;chr3_160947824_+
chr7:156755947-156756084:mpeak_172566|chr7_156742416_156762222_NOM1_NM_+|	95.1552	2.1645	0.756673	-2.86055	0.00422902	0.0484476	46.2925	35.6833	11.0372	5.79738	7.16518	3.7321	195.971	177.822	193.652	204.068	133.75	126.892	16.3915	3.5925	2.47804	0.288153	2.18989	NOM1	chr7:156756042:+	chr7_156963352_+
chr6:152146004-152146140:mpeak_162254|chr6_152011630_152419866_ESR1_NM_+|	1034.39	-4.23914	0.703417	6.02649	1.67557e-09	1.63401e-05	6.17233	17.8417	11.0372	41.7411	80.4093	136.222	2464.3	2516.27	3855.98	869.606	1284.16	1128.96	0.396661	7.87065	-2.88192	1.42859	-4.31051	ESR1	-	chr6_151825036_+
chr10:102115303-102115836:mpeak_26231|chr10_102106771_102120490_SCD_NM_+|	3204.35	-4.51347	0.743226	6.0728	1.25695e-09	1.63401e-05	30.8616	36.278	26.0878	438.282	124.197	199.668	14543.5	8356.44	4825.25	4125.41	2280.92	3465.26	0.336255	7.7206	-3.03124	1.48985	-4.52108	SCD	-	chr10_100355682_+
chr10:102113286-102113662:mpeak_26229|chr10_102106771_102120490_SCD_NM_+|	3166.04	-4.43797	0.736905	6.02245	1.71799e-09	1.63401e-05	15.4308	16.6522	13.0439	185.516	60.506	104.499	14543.5	8356.44	4825.25	4125.41	2280.92	3465.26	0.162765	3.55081	-2.95744	1.48985	-4.44728	SCD	-	chr10_100353872_+
chr12:112525969-112526198:mpeak_46679|chr12_112467457_112546635_NAA25_NM_-|	133.159	-3.3135	0.59902	5.53154	3.17437e-08	8.88001e-05	35.4909	57.688	39.1318	383.786	308.103	242.587	67.8956	90.3977	153.517	73.0469	77.2248	69.0439	42.4331	426.087	-2.82023	0.507659	-3.32789	NAA25	-	chr12_112088298_-
chr5:138620243-138620404:mpeak_150207|chr5_138609440_138665033_MATR3_NM_+|	60.6317	-4.1408	0.756862	5.47102	4.47456e-08	9.54907e-05	6.17233	5.94722	3.01014	23.1895	48.564	27.0578	192.885	165.333	89.3007	44.0601	66.0789	55.9816	3.38079	59.4817	-2.70729	1.42972	-4.13701	MATR3	chr5:138620427:+	chr5_139284708_+;chr5_139284732_+;chr5_139284784_+
chr17:58570681-58570758:mpeak_81958|chr17_58525195_58603601_APPBP2_NM_-|	818.136	-3.25	0.606652	5.35728	8.44821e-08	0.000135445	6.17233	7.73138	10.0338	32.4653	31.8453	21.4596	1987.49	2180.25	2913.81	745.543	885.298	995.539	0.338026	3.26572	-1.8412	1.43099	-3.27219	APPBP2	chr17:58570704:-	chr17_60493343_-
chr4:106387049-106387244:mpeak_138885|chr4_106290910_106395227_PPA2_NM_-|	95.0928	-3.97099	0.759211	5.23042	1.69124e-07	0.000201072	15.4308	30.3308	22.0743	59.1332	148.08	196.869	256.152	130.244	101.341	54.4953	42.9911	83.9724	13.9083	222.685	-2.57453	1.42646	-4.00099	PPA2	-	chr4_105465965_-
chr4:95374380-95374774:mpeak_138051|chr4_95373007_95376969_PDLIM5_NR_+mpeak_138051|chr4_95373007_95585128_PDLIM5_NM_+||	254.832	-2.88385	0.556824	5.1791	2.22954e-07	0.000234089	12.3447	17.8417	15.0507	68.409	40.6027	49.4504	682.042	705.34	565.905	349.002	284.219	267.779	2.31594	17.5874	-1.80856	1.11631	-2.92487	PDLIM5	chr4:95374780:+	-
chr7:98939182-98939329:mpeak_168592|chr7_98923495_98963513_ARPC1A_NM_+|	73.8976	-4.09813	0.799021	5.12895	2.9137e-07	0.000271694	3.08616	5.3525	10.0338	82.3227	47.7679	35.455	243.807	129.649	92.3108	114.788	65.2828	56.9146	3.96603	69.8548	-3.16378	0.97481	-4.13859	ARPC1A	-	chr7_99341596_+
chr1:46660836-46661215:mpeak_4592|chr1_46655029_46685977_POMGNT1_NM_-|	11.5464	-5.38249	1.09133	4.93205	8.137e-07	0.000595328	1.54308	1.18944	2.00676	34.7843	15.1265	14.9284	24.6893	16.0575	11.0372	6.95685	5.57292	4.66513	9.15203	377.084	-3.77413	1.59052	-5.36465	POMGNT1	-	chr1_46195334_-
chr21:48060984-48061105:mpeak_117551|chr21_48055506_48084206_PRMT2_NM_+|	150.751	-3.34985	0.687619	4.87167	1.10658e-06	0.000674673	10.8016	20.2205	30.1014	115.948	255.558	219.261	251.522	198.637	148.5	272.477	160.022	125.959	10.2101	105.785	-3.27279	0.100288	-3.37308	PRMT2	-	chr21_46641193_+
chr6:33677627-33678128:mpeak_155649|chr6_33665527_33679528_UQCC2_NM_-|	231.775	-3.41982	0.707126	4.83622	1.32328e-06	0.000729561	64.8094	98.7238	40.1351	1181.51	616.206	389.072	91.0418	54.1197	51.1723	78.8443	65.2828	50.3834	103.736	1124.25	-3.42452	0.0134605	-3.43798	UQCC2	-	chr6_33710106_-
chr5:64062827-64063063:mpeak_145051|chr5_64020400_64064496_SREK1IP1_NM_-|	53.3245	-3.72016	0.767699	4.84586	1.26066e-06	0.000729561	18.517	41.0358	13.0439	122.904	139.323	110.097	50.9217	39.8464	51.1723	5.79738	18.311	28.9238	51.1459	702.072	-2.35858	1.42034	-3.77893	SREK1IP1	-	chr5_64767129_-
chr6:152172965-152173232:mpeak_162280|chr6_152011630_152419866_ESR1_NM_+|	1038.9	-2.76826	0.57958	4.77632	1.78534e-06	0.000839764	32.4047	25.573	41.1385	53.3359	91.5551	103.566	2464.3	2516.27	3855.98	869.606	1284.16	1128.96	1.12166	7.56861	-1.3258	1.42859	-2.75439	ESR1	-	chr6_151851977_+
chr1:120267650-120267741:mpeak_9545|chr1_120254418_120286508_PHGDH_NM_+|	132.779	-4.19069	0.882598	4.74813	2.05304e-06	0.000928794	1.54308	4.75777	2.00676	41.7411	23.8839	32.6559	478.355	342.56	121.409	248.128	175.945	120.36	0.881609	18.052	-3.56441	0.791468	-4.35587	PHGDH	-	chr1_119725092_+
chr4:102238107-102238597:mpeak_138617|chr4_101947218_102268628_PPP3CA_NM_-|	2327.47	-2.99284	0.636407	4.70271	2.56726e-06	0.00100911	21.6031	41.6305	38.1284	60.2927	97.128	160.481	9368.05	4853.52	5594.84	2616.94	2645.55	2431.47	0.511506	4.13184	-1.64906	1.3649	-3.01396	PPP3CA	-	chr4_101317035_-
chr1:109950745-109951381:mpeak_8013|chr1_109944712_109969108_PSMA5_NM_-|	104.07	-2.88826	0.615391	4.69337	2.6874e-06	0.00103066	63.2664	68.393	79.2669	248.128	225.305	198.735	128.076	64.8247	63.2128	45.2195	21.4956	42.9192	82.3566	613.1	-1.67208	1.22408	-2.89617	PSMA5	-	chr1_109408142_-
chr4:102254848-102255095:mpeak_138626|chr4_101947218_102268628_PPP3CA_NM_-|	2295.61	-4.58053	0.979227	4.6777	2.90109e-06	0.00106949	1.54308	1.78417	0	17.3921	8.75745	7.46421	9368.05	4853.52	5594.84	2616.94	2645.55	2431.47	0.0251855	0.436886	-3.33665	1.3649	-4.70155	PPP3CA	chr4:102254817:-	-
chr12:102093640-102093801:mpeak_45610|chr12_102091416_102122678_CHPT1_NM_+|	39.4174	-3.95512	0.848174	4.6631	3.11481e-06	0.00108123	3.08616	10.1103	4.01351	41.7411	36.6221	19.5936	131.162	59.4722	77.2601	25.5085	15.9226	48.5174	6.42416	108.903	-2.5089	1.57449	-4.0834	CHPT1	-	chr12_101699996_+
chr4:102258406-102258460:mpeak_138627|chr4_101947218_102268628_PPP3CA_NM_-|	2309.02	-3.32754	0.719973	4.62176	3.80501e-06	0.00123939	12.3447	13.0839	15.0507	17.3921	54.1369	85.8384	9368.05	4853.52	5594.84	2616.94	2645.55	2431.47	0.204271	2.04534	-1.95888	1.3649	-3.32378	PPP3CA	-	chr4_101337240_-
chr6:138427870-138428109:mpeak_161124|chr6_138413405_138428660_PERP_NM_-|	291.058	-3.21187	0.69921	4.59357	4.35736e-06	0.00136328	6.17233	15.4628	9.03041	44.0601	30.253	43.8522	1237.55	709.503	453.527	394.222	285.015	264.046	1.27742	12.527	-1.94612	1.34762	-3.29374	PERP	chr6:138427856:-;chr6:138427937:-;chr6:138428041:-	chr6_138106725_-;chr6_138106784_-
chr14:64875616-64875675:mpeak_57036|chr14_64854758_64926476_MTHFD1_NM_+|	126.148	-5.65871	1.23709	4.57421	4.78024e-06	0.00145724	0	0	2.00676	18.5516	18.311	17.7275	520.019	256.325	147.497	241.171	118.624	173.543	0.651657	10.2356	-4.7657	0.792595	-5.5583	MTHFD1	-	chr14_64408975_+
chr1:114372641-114372790:mpeak_8671|chr1_114355233_114442493_AP4B1-AS1_NR_+|	48.921	-4.39431	0.967591	4.5415	5.58564e-06	0.0015906	0	0.594722	4.01351	5.79738	14.3304	19.5936	121.903	103.482	158.534	37.1032	57.3215	64.3788	1.80047	25.0129	-3.10763	1.27356	-4.38119	AP4B1-AS1	chr1:114372791:+	chr1_113830090_+;chr1_113830168_+
chr11:35174457-35174538:mpeak_30772|chr11_35160416_35250675_CD44_NM_+|	62.0861	-4.58804	1.01284	4.52987	5.90199e-06	0.00164137	1.54308	1.18944	1.00338	15.0732	15.9226	24.2587	226.833	117.16	76.2568	107.831	85.1861	72.776	0.888972	20.7885	-3.88656	0.660943	-4.54751	CD44	-	chr11_35152980_+
chr5:10758149-10758394:mpeak_142941|chr5_10681281_10761387_DAP_NM_-|	87.0534	-3.17632	0.704781	4.50681	6.58084e-06	0.00175819	40.1201	36.278	22.0743	144.934	106.682	79.3072	243.807	94.5608	110.372	60.2927	33.4375	72.776	21.9443	198.745	-1.7487	1.4303	-3.17901	DAP	chr5:10758150:-	chr5_10758039_-;chr5_10758199_-
chr4:106364712-106365244:mpeak_138878|chr4_106290910_106395227_PPA2_NM_-|	83.0946	-3.1141	0.69379	4.48853	7.17151e-06	0.00178644	20.0601	29.7361	27.0912	51.0169	95.5358	104.499	256.152	130.244	101.341	54.4953	42.9911	83.9724	15.7641	138.352	-1.70717	1.42646	-3.13363	PPA2	-	chr4_105443668_-
chr13:30154527-30154620:mpeak_49758|chr13_30088720_30169825_SLC7A1_NM_-|	246.52	-3.17556	0.706345	4.49576	6.93224e-06	0.00178644	33.9478	41.0358	24.0811	198.27	222.121	96.1017	788.515	422.847	276.932	394.222	194.256	265.912	6.65626	60.4516	-2.38231	0.800693	-3.183	SLC7A1	-	chr13_29580384_-
chr19:46322156-46322224:mpeak_92968|chr19_46318955_46366548_SYMPK_NM_-|	534.259	-3.52408	0.788896	4.4671	7.92867e-06	0.00185279	7.71541	13.6786	5.01689	70.728	155.246	110.097	1521.48	909.33	495.669	1453.98	1107.42	560.749	0.902481	10.7641	-3.66956	-0.0933747	-3.57618	SYMPK	chr19:46322166:-	chr19_45818909_-
chr3:131209810-131209928:mpeak_128709|chr3_131181719_131221860_MRPL3_NM_-|	153.247	-4.64517	1.04193	4.45821	8.2645e-06	0.00186269	1.54308	2.97361	1.00338	3.47843	27.0685	33.5889	729.878	293.198	212.716	214.503	136.138	182.873	0.446683	12.0214	-3.53837	1.21184	-4.75021	MRPL3	-	chr3_131491031_-
chr1:183603847-183604118:mpeak_14961|chr1_183596729_183605076_ARPC5_NM_-|	225.495	-2.89837	0.65028	4.45712	8.30683e-06	0.00186339	115.731	124.297	126.426	228.417	359.055	236.989	669.698	220.642	273.922	150.732	95.5358	104.499	31.4752	235.045	-1.16982	1.73083	-2.90065	ARPC5	chr1:183603848:-	chr1_183634687_-;chr1_183634704_-;chr1_183634819_-;chr1_183634937_-
chr6:52141440-52141699:mpeak_157100|chr6_52129584_52149679_MCM3_NM_-|	260.924	-3.23856	0.727421	4.45211	8.50324e-06	0.0018985	38.577	22.0047	23.0777	275.955	168.78	169.811	711.361	473.399	174.588	485.82	255.558	332.157	6.15439	57.245	-2.87692	0.340544	-3.21746	MCM3	-	chr6_52276851_-
chr6:152137961-152138221:mpeak_162250|chr6_152011630_152419866_ESR1_NM_+|	1058.95	-3.24058	0.729883	4.43987	9.00143e-06	0.00194578	30.8616	64.23	34.1149	53.3359	148.08	257.515	2464.3	2516.27	3855.98	869.606	1284.16	1128.96	1.46218	13.9802	-1.8286	1.42859	-3.25719	ESR1	-	chr6_151816941_+
chrX:20185981-20186044:mpeak_190313|chrX_20173638_20284750_RPS6KA3_NM_-|	9.58822	-6.49204	1.46769	4.42329	9.72071e-06	0.00199497	0	0	0	9.2758	4.77679	5.59816	23.1462	22.0047	23.0777	10.4353	11.1458	5.59816	#DIV/0!	72.3005	-Inf	1.32787	-Inf	RPS6KA3	-	chrX_20167846_-
chr5:126124443-126124516:mpeak_148877|chr5_126112314_126171914_LMNB1_NM_+|	125.616	-3.48193	0.787536	4.4213	9.81108e-06	0.00199497	9.25849	10.1103	17.0574	128.702	51.7485	57.8476	450.58	215.289	114.385	144.934	121.808	185.672	4.6685	52.6724	-2.70972	0.786298	-3.49602	LMNB1	-	chr5_126788813_+
chr1:1803257-1803511:mpeak_251|chr1_1718492_1822556_GNB1_NM_-|	229.17	-3.05198	0.692084	4.40984	1.03448e-05	0.00206148	49.3786	52.3355	38.1284	245.809	189.479	181.007	740.679	311.634	250.845	350.162	200.625	139.954	10.731	89.2224	-2.13982	0.915796	-3.05561	GNB1	-	chr1_1871814_-
chr20:43975237-43975365:mpeak_112984|chr20_43956055_43977064_SDC4_NM_-|	287.767	-3.63306	0.824548	4.40613	1.05235e-05	0.00206692	15.4308	13.0839	7.02365	76.5254	28.6607	34.522	1441.24	642.894	403.358	416.252	189.479	184.739	1.42868	17.674	-1.97497	1.65391	-3.62888	SDC4	chr20:43975232:-	chr20_45346682_-;chr20_45346707_-
chr19:50489545-50489610:mpeak_93594|chr19_50480041_50528805_VRK3_NM_-|	44.5955	-2.64421	0.600076	4.40646	1.05075e-05	0.00206692	20.0601	27.3572	25.0845	60.2927	70.8557	60.6467	46.2925	61.8511	82.277	30.1464	22.2917	27.9908	38.0745	238.466	-1.40348	1.2434	-2.64688	VRK3	chr19:50489556:-;chr19:50489604:-	chr19_49986302_-
chr18:47807028-47807149:mpeak_87527|chr18_47794033_47808144_MBD1_NM_-|	8.70525	-6.58364	1.49697	4.39798	1.09262e-05	0.00210367	10.8016	5.94722	12.0405	13.9137	22.2917	7.46421	9.25849	10.705	12.0405	0	0	0	89.9553	#DIV/0!	-0.601095	Inf	-Inf	MBD1	-	chr18_50280617_-
chr12:133131027-133131086:mpeak_48545|chr12_133067156_133159556_FBRSL1_NM_+|	65.7047	-3.52211	0.806723	4.36594	1.26576e-05	0.00231824	1.54308	1.78417	4.01351	20.8706	21.4956	23.3257	165.11	111.808	124.419	148.413	89.1667	76.5081	1.82908	20.9151	-3.16171	0.353644	-3.51536	FBRSL1	chr12:133131082:+	chr12_132554493_+
chr6:74230070-74230170:mpeak_157812|chr6_74227657_74230755_EEF1A1_NM_-|	806.419	-6.40766	1.46731	4.36693	1.26004e-05	0.00231824	0	1.18944	0	11.5948	0.796132	6.53118	5095.26	2237.94	1246.2	314.218	97.128	666.181	0.0415919	1.75607	-3.99171	2.99315	-6.98486	EEF1A1	-	chr6_73520397_-
chr3:120317825-120318031:mpeak_127415|chr3_120315127_120319957_NDUFB4_NM_+|	171.472	-2.94013	0.675425	4.35301	1.34281e-05	0.00240892	12.3447	13.0839	11.0372	61.4522	46.9718	45.7183	637.293	271.788	298.003	301.464	156.042	202.467	3.02097	23.3559	-2.07965	0.871049	-2.9507	NDUFB4	-	chr3_120599181_+
chr6:152202093-152202289:mpeak_162301|chr6_152011630_152419866_ESR1_NM_+|	1012.15	-4.65605	1.07091	4.34775	1.37543e-05	0.00244066	0	1.18944	1.00338	3.47843	8.75745	12.1293	2464.3	2516.27	3855.98	869.606	1284.16	1128.96	0.037223	0.742224	-3.47396	1.42859	-4.90255	ESR1	-	chr6_151881167_+
chr10:95175630-95175776:mpeak_25581|chr10_95066758_95242074_MYOF_NM_-|	18.5873	-5.1513	1.19021	4.32808	1.50417e-05	0.00259175	1.54308	0.594722	1.00338	19.7111	15.1265	4.66513	72.5248	32.115	25.0845	16.2327	16.7188	17.7275	2.42143	77.947	-3.65257	1.35599	-5.00856	MYOF	chr10:95175613:-	-
chr6:152200101-152200740:mpeak_162298|chr6_152011630_152419866_ESR1_NM_+|	1456.84	-3.04991	0.708451	4.30504	1.66957e-05	0.00269146	229.919	458.53	626.108	537.997	2017.4	1492.84	2464.3	2516.27	3855.98	869.606	1284.16	1128.96	14.8764	123.319	-1.62272	1.42859	-3.0513	ESR1	-	chr6_151879063_+
chr15:91414132-91414254:mpeak_66918|chr15_91411821_91424515_FURIN_NM_+|	77.2712	-3.59793	0.837559	4.29573	1.74118e-05	0.00276012	1.54308	3.56833	2.00676	19.7111	11.1458	16.7945	276.212	198.042	108.365	113.629	82.0015	94.2356	1.22175	16.4391	-2.74294	1.00717	-3.75011	FURIN	chr15:91414136:+	-
chr19:39335006-39335423:mpeak_92069|chr19_39327420_39342979_HNRNPL_NM_-mpeak_92069|chr19_39327420_39342979_HNRNPL_NM_-||	232.14	-3.33775	0.777738	4.29161	1.77379e-05	0.00276027	166.653	120.729	63.2128	892.796	406.823	369.478	308.616	142.139	70.2365	90.4391	72.448	82.1063	67.2937	681.283	-2.25119	1.08852	-3.33971	HNRNPL	-	chr19_38844735_-
chr3:131185284-131185423:mpeak_128698|chr3_131181719_131221860_MRPL3_NM_-|	153.934	-3.75737	0.877921	4.27985	1.8702e-05	0.00280649	3.08616	6.54194	1.00338	12.7542	30.253	24.2587	729.878	293.198	212.716	214.503	136.138	182.873	0.860297	12.6081	-2.66153	1.21184	-3.87337	MRPL3	-	chr3_131466499_-
chr1:120254654-120254830:mpeak_9539|chr1_120254418_120286508_PHGDH_NM_+|	125.854	-6.1992	1.45273	4.26728	1.97873e-05	0.00290837	0	0	0	13.9137	3.98066	5.59816	478.355	342.56	121.409	248.128	175.945	120.36	#DIV/0!	4.31504	-Inf	0.791468	-Inf	PHGDH	-	chr1_119712133_+
chr17:7588564-7588633:mpeak_76331|chr17_7573008_7590868_TP53_NM_-|	71.0237	-3.31232	0.777235	4.26167	2.02904e-05	0.00293998	3.08616	4.75777	9.03041	28.9869	25.4762	21.4596	277.755	162.359	86.2905	99.7149	70.8557	62.5128	3.20559	32.5732	-2.1697	1.17533	-3.34503	TP53	chr17:7588533:-;chr17:7588567:-	chr17_7685235_-
chr19:45900735-45900865:mpeak_92876|chr19_45883486_45909607_PPP1R13L_NM_-|	47.113	-2.62112	0.617029	4.24797	2.15719e-05	0.00300842	23.1462	29.7361	40.1351	88.1201	100.313	71.843	54.0079	45.1989	47.1588	17.3921	17.5149	30.7899	63.5515	396.177	-1.48447	1.15568	-2.64015	PPP1R13L	-	chr19_45397460_-
chr11:14531720-14532027:mpeak_29777|chr11_14526794_14665180_PSMA1_NM_-|	66.2118	-3.42639	0.806251	4.24978	2.13984e-05	0.00300842	3.08616	11.2997	7.02365	27.8274	46.9718	36.388	243.807	94.5608	118.399	41.7411	53.3408	110.097	4.68719	54.1903	-2.37667	1.15457	-3.53124	PSMA1	-	chr11_14510184_-
chr21:41755654-41756380:mpeak_116865|chr21_41755009_41756505_DSCAM-AS1_NR_+|	147.364	-3.77671	0.889656	4.24513	2.18468e-05	0.00302019	21.6031	16.0575	3.01014	350.162	226.897	306.966	163.567	65.4194	95.3209	99.7149	77.2248	342.421	12.5408	170.214	-4.44202	-0.679375	-3.76265	DSCAM-AS1	chr21:41755838:+	chr21_40383781_+
chr4:102062564-102062964:mpeak_138528|chr4_101947218_102268628_PPP3CA_NM_-|	2333.63	-3.26182	0.77118	4.22965	2.34051e-05	0.00317172	21.6031	38.0622	44.1487	31.3058	158.43	199.668	9368.05	4853.52	5594.84	2616.94	2645.55	2431.47	0.523879	5.06117	-1.90727	1.3649	-3.27217	PPP3CA	-	chr4_101141700_-
chr4:106306118-106306494:mpeak_138875|chr4_106290910_106395227_PPA2_NM_-|	64.2278	-3.52879	0.838259	4.20967	2.55746e-05	0.00335049	10.8016	5.3525	4.01351	11.5948	44.5834	25.1917	256.152	130.244	101.341	54.4953	42.9911	83.9724	4.13493	44.842	-2.01246	1.42646	-3.43892	PPA2	chr4:106306480:-	chr4_105385323_-
chr10:5010470-5010659:mpeak_19430|chr10_5005453_5019891_AKR1C1_NM_+|	4.06995	-7.05997	1.68367	4.19321	2.75039e-05	0.00349725	0	0	0	6.95685	6.36905	7.46421	7.71541	10.1103	4.01351	1.15948	3.18453	1.86605	#DIV/0!	334.782	-Inf	1.81424	-Inf	AKR1C1	-	chr10_4968327_+
chr8:101944184-101944259:mpeak_177959|chr8_101932980_101965623_YWHAZ_NM_-|	258.791	-3.26191	0.779553	4.18434	2.85996e-05	0.00358544	1.54308	10.705	5.01689	20.8706	27.0685	21.4596	1174.29	516.218	503.696	384.946	215.752	223.926	0.786846	8.41579	-2.00706	1.41189	-3.41895	YWHAZ	-	chr8_100931956_-
chr10:72644162-72644307:mpeak_23766|chr10_72643805_72648543_PCBD1_NM_-|	63.9648	-3.1266	0.749374	4.17229	3.01556e-05	0.00369894	6.17233	6.54194	4.01351	22.03	20.6994	30.7899	217.575	115.971	118.399	112.469	54.1369	58.7807	3.7013	32.6192	-2.13588	1.00374	-3.13962	PCBD1	-	chr10_70884465_-
chr18:9717600-9717754:mpeak_85744|chr18_9708227_9859224_RAB31_NM_+|	330.555	-3.1297	0.75028	4.17137	3.02772e-05	0.00370144	4.62925	2.97361	5.01689	16.2327	12.7381	6.53118	1211.32	704.745	1023.45	394.222	250.781	334.023	0.429315	3.62625	-1.49222	1.58616	-3.07837	RAB31	chr18:9717787:+	chr18_9717792_+
chr7:80385340-80385746:mpeak_167767|chr7_80374623_80548667_SEMA3C_NM_-|	282.583	-2.87416	0.690107	4.1648	3.11626e-05	0.00375183	47.8355	125.486	83.2804	107.831	304.918	264.046	819.376	523.95	468.578	150.732	252.374	242.587	14.162	104.817	-1.39919	1.48859	-2.88778	SEMA3C	chr7:80385641:-	-
chr10:5920047-5920108:mpeak_19558|chr10_5904654_5931860_ANKRD16_NM_-|	35.2926	-3.33393	0.800493	4.16484	3.11569e-05	0.00375183	35.4909	20.2205	12.0405	33.6248	20.6994	9.33026	94.128	79.098	93.3142	11.5948	5.57292	8.39724	25.419	248.992	0.090001	3.38212	-3.29212	ANKRD16	chr10:5920052:-	chr10_5878090_-
chr10:127395788-127395923:mpeak_28116|chr10_127395769_127408062_FLJ37035_NR_-|	5.57639	-7.26991	1.74844	4.15793	3.21145e-05	0.00384695	1.54308	2.97361	1.00338	2.31895	18.311	11.1963	4.62925	5.94722	18.0608	0	0	0.933026	19.2758	1137.03	-2.52746	4.93983	-7.46729	FLJ37035	chr10:127395806:-;chr10:127395871:-	chr10_125707238_-;chr10_125707304_-
chr12:117352630-117352760:mpeak_47145|chr12_117348760_117465832_FBXW8_NM_+|	75.1293	-3.45678	0.83417	4.14398	3.41331e-05	0.00396878	3.08616	7.13666	0	30.1464	23.8839	10.2633	205.23	173.064	170.574	100.874	113.847	63.4458	2.79379	23.1133	-2.65288	0.980509	-3.63339	FBXW8	chr12:117352762:+	chr12_116914954_+
chr1:145604610-145604993:mpeak_10319|chr1_145592256_145611044_POLR3C_NM_-|	72.5678	-2.5069	0.605375	4.14107	3.45687e-05	0.0039805	38.577	44.0094	49.1655	96.2364	84.3899	72.776	89.4987	106.455	166.561	51.0169	25.4762	46.6513	36.3439	205.777	-0.943606	1.55769	-2.50129	POLR3C	chr1:145604792:-	-
chr10:60040049-60040228:mpeak_22891|chr10_60028861_60047320_CISD1_NM_+|	65.3279	-5.08285	1.22949	4.1341	3.56343e-05	0.00405412	1.54308	0.594722	0	5.79738	7.96132	7.46421	296.272	132.623	136.459	78.8443	55.7292	60.6467	0.567203	10.8713	-3.31142	1.53405	-4.84547	CISD1	-	chr10_58280352_+
chr11:45886620-45886745:mpeak_31059|chr11_45868668_45902464_CRY2_NM_+|	108.094	-2.75102	0.667057	4.12412	3.72153e-05	0.00416299	20.0601	11.8944	12.0405	30.1464	9.55358	17.7275	391.943	289.629	318.071	76.5254	64.4867	55.0485	4.40107	29.2907	-0.384399	2.35011	-2.73451	CRY2	-	chr11_45865134_+
chrX:21961526-21961638:mpeak_190331|chrX_21958690_22012429_SMS_NM_+|	89.2473	-3.42609	0.833369	4.11114	3.93716e-05	0.00427548	24.6893	24.9783	16.0541	99.7149	86.7783	40.1201	379.598	118.944	91.3074	86.9606	31.8453	69.977	11.1421	120.039	-1.78579	1.64362	-3.42941	SMS	-	chrX_21943526_+
chr6:109693657-109693797:mpeak_159581|chr6_109690220_109703762_CD164_NM_-|	46.6401	-3.59775	0.877346	4.10072	4.11875e-05	0.00440344	0	0.594722	6.02027	16.2327	7.96132	13.9954	141.964	101.697	105.355	61.4522	49.3602	55.0485	2.84299	23.0249	-2.52936	1.07332	-3.60268	CD164	-	chr6_109372427_-
chr1:230291908-230291988:mpeak_18118|chr1_230193535_230415048_GALNT2_NM_+|	30.764	-4.3339	1.06311	4.07664	4.56904e-05	0.0046728	1.54308	2.97361	2.00676	31.3058	22.2917	6.53118	138.877	39.2516	34.1149	42.9006	17.5149	29.8568	3.07356	66.6081	-3.20435	1.23337	-4.43771	GALNT2	-	chr1_230156231_+
chr10:89420848-89421184:mpeak_25029|chr10_89419475_89505588_PAPSS2_NM_+|	115.413	-3.59229	0.885282	4.05779	4.95394e-05	0.00483932	4.62925	2.97361	0	9.2758	14.3304	13.0624	422.804	347.912	170.574	141.456	171.168	86.7714	1.21156	9.181	-2.26993	1.23682	-3.50675	PAPSS2	chr10:89421174:+	-
chr9:132259201-132259321:mpeak_188623|chr9_132250938_132275697_LINC00963_NR_+|	39.9905	-3.87243	0.954024	4.05905	4.92734e-05	0.00483932	52.4648	29.1414	26.0878	164.645	85.9822	91.4366	6.17233	7.73138	11.0372	0	2.38839	2.79908	431.797	4396.03	-1.66733	2.26541	-3.93274	LINC00963	-	chr9_129497034_+;chr9_129497067_+
chr9:101986698-101986840:mpeak_185797|chr9_101984569_101992618_SEC61B_NM_+|	184.812	-3.22518	0.796797	4.04768	5.17278e-05	0.00491011	124.99	184.364	140.473	402.338	348.706	259.381	347.193	94.5608	169.571	41.7411	16.7188	87.7045	73.5822	691.294	-1.16752	2.06435	-3.23187	SEC61B	-	chr9_99224575_+
chr7:80500611-80500732:mpeak_167816|chr7_80374623_80548667_SEMA3C_NM_-|	215.038	-3.05926	0.756344	4.0448	5.23676e-05	0.00494126	12.3447	8.3261	11.0372	9.2758	50.1563	31.7229	819.376	523.95	468.578	150.732	252.374	242.587	1.74998	14.1174	-1.52348	1.48859	-3.01207	SEMA3C	-	chr7_80871245_-
chr16:21985877-21986638:mpeak_69911|chr16_21964608_21994408_UQCRC2_NM_+|	105.795	-2.89696	0.716443	4.04353	5.26522e-05	0.00494847	32.4047	47.5777	22.0743	71.8875	121.012	120.36	293.186	203.99	109.368	77.6848	47.7679	122.226	16.826	126.478	-1.61799	1.29214	-2.91013	UQCRC2	-	chr16_21974716_+
chr6:33240369-33240720:mpeak_155553|chr6_33239851_33244167_RPS18_NM_+|	520.567	-3.26354	0.810843	4.02487	5.70067e-05	0.00515401	66.3525	27.3572	27.0912	396.541	124.197	118.494	1819.29	859.968	840.831	1009.9	437.076	519.696	3.43175	32.5032	-2.40371	0.839855	-3.24356	RPS18	chr6:33240495:+	chr6_33272643_+;chr6_33272696_+
chr9:96322523-96322649:mpeak_185090|chr9_96213977_96326510_FAM120A_NM_+|	2251.24	-2.37752	0.59153	4.01927	5.83784e-05	0.00522508	21.6031	16.6522	28.0946	45.2195	54.9331	34.522	9138.13	5518.42	4561.36	2571.72	2664.65	2359.62	0.345251	1.77297	-1.02131	1.33914	-2.36045	FAM120A	chr9:96322657:+	chr9_93560375_+
chr17:36472588-36472712:mpeak_79058|chr17_36452988_36478391_MRPL45_NM_+|	49.1984	-3.19836	0.801622	3.98986	6.61129e-05	0.00564351	15.4308	23.7889	19.0642	83.4822	105.089	47.5843	121.903	41.6305	43.1453	30.1464	14.3304	44.7853	28.2002	264.565	-2.01857	1.21128	-3.22985	MRPL45	chr17:36472664:+	-
chr13:25049318-25049376:mpeak_49327|chr13_24995452_25086948_PARP4_NM_-|	13.866	-4.16233	1.04541	3.98152	6.84762e-05	0.00572312	3.08616	1.18944	8.02703	34.7843	39.8066	24.2587	23.1462	8.92083	6.02027	4.6379	3.18453	9.33026	32.3011	576.292	-3.00627	1.15088	-4.15714	PARP4	-	chr13_24475188_-
chr22:36745243-36745353:mpeak_119366|chr22_36678831_36784112_MYH9_NM_-|	335.409	-3.97922	1.004	3.96335	7.39048e-05	0.00591686	0	1.78417	5.01689	34.7843	6.36905	13.0624	1442.78	863.536	392.321	510.169	470.514	284.573	0.378027	4.28496	-2.99488	1.0928	-4.08768	MYH9	chr22:36745301:-	chr22_36349256_-
chr16:2806693-2807073:mpeak_68019|chr16_2802329_2820858_SRRM2_NM_+|	347.537	-2.85834	0.72249	3.95623	7.61407e-05	0.00598734	114.188	120.729	70.2365	539.156	509.524	335.889	592.543	502.54	431.453	154.21	182.314	617.663	19.9899	145.105	-2.18183	0.677917	-2.85975	SRRM2	-	chr16_2757006_+
chr3:148762910-148763272:mpeak_129866|chr3_148750159_148804341_HLTF_NM_-|	48.5327	-3.32967	0.841936	3.95478	7.66063e-05	0.00599192	1.54308	16.0575	8.02703	28.9869	70.0596	66.2449	109.559	88.6135	48.1622	28.9869	46.1756	69.977	10.4036	113.884	-2.68924	0.763179	-3.45242	HLTF	-	chr3_149045165_-
chr15:74328683-74328741:mpeak_65247|chr15_74287013_74336561_PML_NM_+|	55.9005	-3.15179	0.799223	3.94357	8.02771e-05	0.00611948	10.8016	10.705	5.01689	8.11633	5.57292	4.66513	199.058	248.594	133.449	19.7111	16.7188	8.39724	4.56435	40.9448	0.531145	3.69635	-3.1652	PML	chr15:74328735:+	chr15_74036393_+
chr11:33162957-33163109:mpeak_30511|chr11_33106835_33183037_CSTF3_NM_-|	50.9405	-3.09915	0.786902	3.93842	8.20205e-05	0.00615231	26.2324	19.0311	20.0676	34.7843	40.6027	64.3788	95.6711	105.266	123.416	13.9137	11.942	55.9816	20.142	170.785	-1.09717	1.98673	-3.0839	CSTF3	chr11:33162977:-;chr11:33163048:-	chr11_33141432_-;chr11_33141488_-;chr11_33141542_-
chr1:206767310-206767463:mpeak_16752|chr1_206765177_206785904_EIF2D_NM_-|	38.7742	-4.02971	1.02439	3.93375	8.36309e-05	0.00623378	1.54308	11.2997	6.02027	10.4353	22.2917	27.0578	112.645	90.3977	124.419	6.95685	5.57292	46.6513	5.76039	101.02	-1.66421	2.46812	-4.13233	EIF2D	chr1:206767388:-	chr1_206594040_-;chr1_206594069_-
chr7:56142869-56143036:mpeak_166395|chr7_56131916_56147220_SUMF2_NM_+|	64.2714	-5.93466	1.51097	3.92771	8.57568e-05	0.0063101	0	0	0	4.6379	2.38839	16.7945	242.264	137.381	54.1824	140.297	109.866	63.4458	#DIV/0!	7.5957	-Inf	0.468155	-Inf	SUMF2	chr7:56142987:+;chr7:56143044:+	chr7_56075262_+;chr7_56075292_+;chr7_56075349_+
chr7:80501271-80501402:mpeak_167817|chr7_80374623_80548667_SEMA3C_NM_-|	208.017	-3.98337	1.01443	3.92671	8.61144e-05	0.0063101	4.62925	1.18944	1.00338	0	15.9226	15.8614	819.376	523.95	468.578	150.732	252.374	242.587	0.376514	7.38372	-2.22002	1.48859	-3.70861	SEMA3C	-	chr7_80872025_-
chr3:145833203-145833420:mpeak_129796|chr3_145788659_145879282_PLOD2_NM_-|	84.6059	-3.03434	0.772685	3.92701	8.60066e-05	0.0063101	13.8877	27.3572	18.0608	13.9137	40.6027	34.522	288.556	211.126	234.791	24.349	27.8646	80.2403	8.0746	67.2222	-0.586255	2.47122	-3.05748	PLOD2	-	chr3_146115419_-
chr4:103736001-103736154:mpeak_138750|chr4_103718617_103790050_UBE2D3_NM_-|	307.985	-5.52848	1.40717	3.92878	8.53767e-05	0.0063101	0	0	0	1.15948	4.77679	8.39724	1120.28	698.203	489.649	435.963	359.851	577.543	#DIV/0!	1.04368	-Inf	0.749017	-Inf	UBE2D3	chr4:103736104:-	chr4_102814948_-
chr4:84189261-84189414:mpeak_137545|chr4_84185516_84206067_COQ2_NM_-|	47.7085	-3.25517	0.830235	3.92078	8.82637e-05	0.00637913	10.8016	7.13666	2.00676	19.7111	24.6801	18.6605	211.402	93.966	59.1993	52.1764	32.6414	40.1201	5.47086	50.4664	-1.66051	1.54498	-3.20548	COQ2	-	chr4_83268209_-
chr16:75340647-75341180:mpeak_73719|chr16_75327940_75467387_CFDP1_NM_-|	26.94	-3.30636	0.844654	3.91446	9.06078e-05	0.00647573	6.17233	24.3836	18.0608	32.4653	88.3706	56.9146	33.9478	20.8153	17.0574	5.79738	7.16518	12.1293	67.692	708.398	-1.87033	1.51717	-3.3875	CFDP1	-	chr16_75307007_-
chr10:72175570-72175693:mpeak_23734|chr10_72163860_72181471_EIF4EBP2_NM_+|	84.3708	-2.4094	0.61867	3.89449	9.84074e-05	0.0067294	16.9739	14.2733	13.0439	19.7111	39.8066	37.321	226.833	164.143	222.75	100.874	65.2828	91.4366	7.21676	37.5936	-1.12857	1.2525	-2.38106	EIF4EBP2	-	chr10_70415855_+
chr1:151493733-151493794:mpeak_11738|chr1_151483861_151509680_CGN_NM_+|	264.462	-5.75883	1.47912	3.89341	9.88452e-05	0.0067345	0	0	0	1.15948	13.5342	6.53118	882.643	619.7	291.983	682.931	452.999	222.06	#DIV/0!	1.56296	-Inf	0.401969	-Inf	CGN	chr1:151493790:+	chr1_151521318_+
chr4:108917569-108917705:mpeak_139075|chr4_108910869_108955394_HADH_NM_+|	52.7536	-3.2382	0.832903	3.88785	0.000101137	0.00678631	6.17233	5.3525	2.00676	37.1032	20.6994	18.6605	178.997	103.482	57.1926	93.9175	52.5447	56.9146	3.98372	37.5968	-2.49843	0.739986	-3.23842	HADH	chr4:108917742:+	chr4_107996488_+;chr4_107996584_+
chr5:138634203-138634380:mpeak_150214|chr5_138609440_138665033_MATR3_NM_+|	103.239	-2.30039	0.591923	3.8863	0.000101784	0.00679838	54.0079	77.3138	88.2973	112.469	140.119	153.016	192.885	165.333	89.3007	44.0601	66.0789	55.9816	49.0748	244.163	-0.885071	1.42972	-2.31479	MATR3	-	chr5_139298701_+
chr15:64449806-64449940:mpeak_64133|chr15_64448344_64455354_PPIB_NM_-|	66.4917	-3.85043	0.993572	3.87534	0.000106474	0.00695526	0	1.78417	4.01351	32.4653	8.75745	13.9954	228.376	135.002	96.3243	144.934	82.7977	49.4504	1.89177	19.9212	-3.2516	0.729864	-3.98146	PPIB	-	chr15_64157672_-
chr2:216981836-216981906:mpeak_108375|chr2_216974019_217069910_XRCC5_NM_+|	459.477	-3.80088	0.980869	3.87501	0.000106619	0.00695526	3.08616	1.78417	1.00338	18.5516	5.57292	11.1963	2038.41	1163.28	568.916	721.194	384.532	596.204	0.155776	2.07534	-2.58818	1.14762	-3.7358	XRCC5	-	chr2_216117181_+
chr20:56273815-56273984:mpeak_114769|chr20_56227654_56286592_PMEPA1_NM_-|	1317.49	-2.43249	0.628652	3.86937	0.000109115	0.00705036	367.253	388.948	365.23	2063.87	1476.82	792.139	2996.66	1874.56	1165.93	1735.73	1317.6	1265.18	18.5755	100.331	-1.94997	0.483333	-2.4333	PMEPA1	chr20:56273891:-	chr20_57698832_-
chr7:99749989-99750482:mpeak_168784|chr7_99746529_99751489_LAMTOR4_NM_+|	131.968	-2.70985	0.701614	3.86231	0.000112321	0.00717951	21.6031	19.0311	20.0676	112.469	57.3215	97.9678	404.287	221.831	123.416	230.736	137.731	137.155	8.0986	52.9563	-2.14112	0.567937	-2.70906	LAMTOR4	-	chr7_100152720_+
chr17:34140071-34140344:mpeak_78787|chr17_34136458_34173909_TAF15_NM_+|	122.248	-2.48974	0.645198	3.85888	0.000113907	0.00722259	23.1462	30.9255	40.1351	129.861	89.9629	128.758	294.729	198.637	126.426	192.473	118.624	93.3026	15.1998	86.1974	-1.88759	0.616003	-2.5036	TAF15	-	chr17_35813211_+
chr17:74308865-74309015:mpeak_84398|chr17_74307781_74350230_PRPSAP1_NM_-|	61.7812	-2.88662	0.748364	3.85725	0.000114671	0.00725174	0	16.6522	8.02703	37.1032	23.0878	30.7899	157.394	130.244	146.493	76.5254	52.5447	62.5128	8.5271	47.4891	-1.88227	1.18016	-3.06243	PRPSAP1	chr17:74308871:-	chr17_76312777_-
chr3:63891456-63891636:mpeak_125042|chr3_63850232_63985125_ATXN7_NM_+|	159.733	-2.37847	0.619688	3.83818	0.000123951	0.00752821	72.5248	92.1819	98.3311	107.831	182.314	147.418	203.687	267.625	450.517	67.2496	89.9629	137.155	28.5344	148.645	-0.734222	1.64688	-2.3811	ATXN7	chr3:63891556:+	-
chr7:80520371-80520726:mpeak_167828|chr7_80374623_80548667_SEMA3C_NM_-|	213.196	-3.25343	0.848201	3.83568	0.000125216	0.00759536	1.54308	9.51555	11.0372	8.11633	50.9524	19.5936	819.376	523.95	468.578	150.732	252.374	242.587	1.21948	12.1826	-1.8319	1.48859	-3.32049	SEMA3C	-	chr7_80891181_-
chr2:47403453-47403627:mpeak_98337|chr2_47387943_47404075_CALM2_NM_-|	97.383	-3.05929	0.80129	3.81796	0.000134559	0.00786129	7.71541	4.75777	6.02027	51.0169	14.3304	21.4596	325.59	139.165	210.709	102.034	112.255	173.543	2.73789	22.3826	-2.23079	0.800451	-3.03125	CALM2	chr2:47403491:-	chr2_47176436_-
chr7:80423298-80423793:mpeak_167789|chr7_80374623_80548667_SEMA3C_NM_-|	214.593	-2.81443	0.737024	3.81864	0.000134189	0.00786129	3.08616	14.2733	15.0507	12.7542	35.0298	37.321	819.376	523.95	468.578	150.732	252.374	242.587	1.78874	13.1804	-1.3928	1.48859	-2.88139	SEMA3C	-	chr7_80794249_-;chr7_80794324_-
chrX:109263586-109263716:mpeak_192653|chrX_109245862_109416472_TMEM164_NM_+|	66.9446	-2.74578	0.719438	3.81655	0.000135328	0.00788684	33.9478	45.1989	41.1385	115.948	128.177	47.5843	152.765	67.2036	68.2297	46.379	33.4375	23.3257	41.7369	282.822	-1.27807	1.48243	-2.7605	TMEM164	-	chrX_110020479_+
chr3:47781131-47781317:mpeak_123870|chr3_47629796_47823405_SMARCC1_NM_-|	279.582	-2.37284	0.623467	3.80587	0.000141304	0.00804226	20.0601	17.2469	20.0676	64.9306	56.5253	33.5889	884.186	730.913	446.503	468.428	339.152	273.377	2.78301	14.3433	-1.4342	0.931457	-2.36566	SMARCC1	-	chr3_47739707_-
chrX:109442113-109442416:mpeak_192685|chrX_109441862_109683461_AMMECR1_NM_-|	39.2143	-3.09486	0.814789	3.79836	0.000145658	0.00817818	1.54308	5.3525	4.01351	3.47843	10.3497	7.46421	91.0418	116.565	153.517	25.5085	24.6801	27.0578	3.02087	27.5642	-0.964804	2.22496	-3.18976	AMMECR1	-	chrX_110198855_-
chr11:63437881-63437997:mpeak_32239|chr11_63396877_63439446_ATL3_NM_-|	126.175	-2.56182	0.675259	3.79383	0.000148343	0.00825101	10.8016	11.8944	8.02703	17.3921	21.4956	13.0624	499.959	387.164	226.764	127.542	105.089	84.9054	2.75819	16.3603	-0.757804	1.8106	-2.56841	ATL3	-	chr11_63670363_-
chr11:57083293-57083465:mpeak_31553|chr11_57067555_57092413_TNKS1BP1_NM_-|	99.2637	-2.7097	0.715259	3.78843	0.000151605	0.00831573	38.577	35.0886	13.0439	258.563	151.265	219.261	112.645	73.7455	39.1318	112.469	69.2634	68.1109	38.4483	251.793	-2.859	-0.147755	-2.71125	TNKS1BP1	-	chr11_57315897_-
chr11:68332905-68333159:mpeak_33273|chr11_68228185_68380533_PPP6R3_NM_+|	313.127	-2.09982	0.557877	3.76394	0.000167255	0.00876955	117.274	208.153	200.676	418.571	471.31	353.617	464.468	435.931	383.291	158.848	214.159	331.224	40.9836	176.575	-1.24099	0.866174	-2.10716	PPP6R3	-	chr11_68565509_+
chr4:102064018-102064899:mpeak_138529|chr4_101947218_102268628_PPP3CA_NM_-|	2389.38	-3.33615	0.888667	3.75411	0.00017396	0.00901454	16.9739	97.5344	120.405	74.2064	410.804	442.254	9368.05	4853.52	5594.84	2616.94	2645.55	2431.47	1.18545	12.0519	-1.98085	1.3649	-3.34575	PPP3CA	-	chr4_101143203_-;chr4_101143348_-
chr18:47806861-47807018:mpeak_87526|chr18_47794033_47808144_MBD1_NM_-|	4.73195	-6.547	1.74512	3.75161	0.0001757	0.00907961	3.08616	0	7.02365	6.95685	3.98066	3.7321	9.25849	10.705	12.0405	0	0	0	47.3838	#DIV/0!	-0.537075	Inf	-Inf	MBD1	-	chr18_50280617_-
chr5:1577889-1578101:mpeak_142637|chr5_1572401_1594646_SDHAP3_NR_-|	146.531	-3.03038	0.80834	3.74889	0.000177619	0.00912327	4.62925	4.16305	5.01689	5.79738	20.6994	20.5266	557.053	390.732	240.811	236.533	124.993	147.418	1.16181	9.2394	-1.76775	1.22368	-2.99143	SDHAP3	chr5:1578049:-	chr5_1577935_-
chr3:63894238-63894485:mpeak_125046|chr3_63850232_63985125_ATXN7_NM_+|	103.355	-3.61512	0.964343	3.74879	0.000177692	0.00912327	0	2.97361	1.00338	8.11633	6.36905	5.59816	203.687	267.625	450.517	67.2496	89.9629	137.155	0.647136	6.82261	-2.33627	1.64688	-3.98315	ATXN7	chr3:63894400:+	chr3_63908721_+
chr17:45693998-45694305:mpeak_80209|chr17_45608443_45699133_NPEPPS_NM_+|	533.747	-2.05515	0.548211	3.74882	0.000177667	0.00912327	30.8616	58.2827	36.1216	56.8143	64.4867	84.9054	1754.48	1464.2	1153.89	638.871	530.224	531.825	2.86481	12.1232	-0.719094	1.36217	-2.08126	NPEPPS	-	chr17_47616878_+
chr1:164545166-164545435:mpeak_13251|chr1_164528596_164815820_PBX1_NM_+|	210.846	-2.53415	0.678289	3.7361	0.000186897	0.00946012	12.3447	38.6569	35.1182	62.6117	151.265	123.159	546.251	375.269	348.172	307.261	335.968	194.069	6.78273	40.2528	-1.96849	0.600666	-2.56915	PBX1	-	chr1_164575979_+
chr5:134711473-134711630:mpeak_149844|chr5_134670831_134735577_H2AFY_NM_-|	238.816	-3.32328	0.890831	3.73054	0.000191068	0.00956843	1.54308	1.78417	2.00676	13.9137	9.55358	13.0624	865.669	453.773	372.253	459.152	301.734	371.344	0.315305	3.22634	-2.77578	0.579302	-3.35508	H2AFY	chr5:134711477:-	-
chr7:6521437-6521703:mpeak_164047|chr7_6502806_6523849_KDELR2_NM_-|	148.516	-3.02166	0.81308	3.71632	0.000202149	0.00981699	9.25849	4.75777	2.00676	42.9006	13.5342	18.6605	529.277	272.383	250.845	272.477	187.887	178.208	1.52237	11.7599	-2.22858	0.720905	-2.94948	KDELR2	chr7:6521435:-	chr7_6481807_-;chr7_6481969_-
chr3:107797241-107797400:mpeak_126796|chr3_107766139_107809935_CD47_NM_-|	124.646	-2.70823	0.728878	3.71561	0.000202714	0.00981699	12.3447	14.868	5.01689	23.1895	58.9137	37.321	444.408	223.615	192.649	162.327	145.692	175.409	3.7447	24.7037	-1.88964	0.832163	-2.7218	CD47	-	chr3_108078402_-
chr15:83208030-83208093:mpeak_66121|chr15_82821289_83209295_RPS17_NR_-mpeak_66121|chr15_83205632_83209295_RPS17_NM_-||	251.686	-3.90085	1.05065	3.71279	0.000204983	0.00988028	6.17233	6.54194	0	51.0169	10.3497	5.59816	1203.6	555.47	428.443	355.959	175.945	221.127	0.871829	8.8927	-2.39695	1.53851	-3.93547	RPS17	-	chr15_82539287_-
chr6:170845723-170845805:mpeak_163327|chr6_170844493_170862417_PSMB1_NM_-|	485.41	-4.27625	1.15187	3.71244	0.000205268	0.00988028	0	0.594722	2.00676	3.47843	7.96132	12.1293	2160.31	1104.99	722.432	776.848	361.444	672.712	0.0978554	1.30144	-3.17949	1.13878	-4.31827	PSMB1	chr6:170845733:-	-
chr2:161045035-161045184:mpeak_105115|chr2_160958345_161056824_ITGB6_NM_-|	71.6957	-4.6573	1.26203	3.69034	0.000223955	0.0102813	0	0.594722	2.00676	4.6379	57.3215	38.2541	78.6972	140.354	87.2939	57.9738	203.81	189.404	1.2738	22.211	-5.2676	-0.558569	-4.70903	ITGB6	-	chr2_160188606_-
chr1:155660280-155660392:mpeak_12419|chr1_155658881_155707947_DAP3_NM_+|	123.399	-2.67743	0.727161	3.68204	0.000231375	0.0104986	13.8877	14.2733	19.0642	76.5254	56.5253	39.1871	396.572	214.695	193.652	135.659	77.2248	243.52	5.86708	37.7381	-1.86677	0.818534	-2.68531	DAP3	chr1:155660395:+	chr1_155690601_+
chr3:39450197-39450291:mpeak_123233|chr3_39448179_39453764_RPSA_NM_+|	312.958	-5.28827	1.43768	3.67835	0.000234751	0.0105919	0	0.594722	0	13.9137	1.59226	8.39724	1191.26	668.467	515.737	758.297	330.395	266.845	0.0751081	1.76338	-5.32885	0.809344	-6.13819	RPSA	chr3:39450198:+	chr3_39408769_+;chr3_39408816_+
chrX:56781162-56781249:mpeak_191506|chrX_56755717_56843752_LINC01420_NR_+|	26.9025	-3.57756	0.973932	3.67332	0.00023942	0.0106909	3.08616	4.16305	4.01351	6.95685	11.942	32.6559	112.645	33.3044	43.1453	32.4653	15.1265	23.3257	5.95613	72.6968	-2.19455	1.4149	-3.60944	LINC01420	-	chrX_56754813_+
chr2:216831052-216831183:mpeak_108343|chr2_216809720_216878346_MREG_NM_-|	100.737	-2.62845	0.716882	3.6665	0.000245892	0.0108677	27.7755	94.5608	49.1655	264.36	406.823	205.266	41.6632	23.7889	24.0811	22.03	27.8646	21.4596	191.551	1228.31	-2.35345	0.327423	-2.68087	MREG	-	chr2_215966360_-
chr10:89476227-89476380:mpeak_25046|chr10_89419475_89505588_PAPSS2_NM_+|	119.247	-2.97736	0.814552	3.65521	0.000256969	0.0111026	4.62925	11.2997	4.01351	11.5948	38.2143	20.5266	422.804	347.912	170.574	141.456	171.168	86.7714	2.11863	17.6105	-1.81841	1.23682	-3.05523	PAPSS2	chr10:89476281:+	chr10_87716523_+
chr12:116427441-116427862:mpeak_46969|chr12_116399203_116714991_MED13L_NM_-|	355.907	-1.63064	0.44637	3.6531	0.000259092	0.011114	242.264	225.994	192.649	310.739	381.347	304.167	655.81	548.928	552.862	275.955	272.277	307.899	37.6028	116.367	-0.592065	1.0377	-1.62977	MED13L	-	chr12_115989750_-
chr3:145846612-145846747:mpeak_129804|chr3_145788659_145879282_PLOD2_NM_-|	74.8275	-3.31297	0.908757	3.6456	0.000266766	0.0112368	0	5.3525	5.01689	3.47843	8.75745	8.39724	288.556	211.126	234.791	24.349	27.8646	80.2403	2.11772	15.5776	-0.99263	2.47122	-3.46385	PLOD2	-	chr3_146128866_-
chr2:15745630-15745752:mpeak_95631|chr2_15731744_15770899_DDX1_NM_+|	21.0411	-3.60208	0.990297	3.63737	0.000275431	0.0114586	0	2.37889	2.00676	16.2327	15.9226	13.0624	61.7233	35.6833	21.0709	31.3058	16.7188	36.388	5.5525	53.5674	-3.36603	0.489083	-3.85511	DDX1	-	chr2_15605622_+
chr3:45018205-45018297:mpeak_123634|chr3_45017740_45053674_EXOSC7_NR_+mpeak_123634|chr3_45017740_45052726_EXOSC7_NM_+||	27.7728	-4.22903	1.16668	3.62484	0.000289138	0.0118435	1.54308	1.18944	0	10.4353	5.57292	9.33026	109.559	59.4722	35.1182	46.379	23.8839	30.7899	2.00774	25.0745	-3.21302	1.01451	-4.22754	EXOSC7	chr3:45018295:+	-
chr11:57102445-57102566:mpeak_31564|chr11_57093952_57103351_SSRP1_NM_-|	321.434	-5.52842	1.52743	3.61942	0.000295266	0.0119906	0	0.594722	0	20.8706	3.18453	0.933026	1481.36	716.64	351.182	621.479	355.871	305.1	0.0699898	1.94847	-5.39288	0.991132	-6.38402	SSRP1	chr11:57102542:-	-
chr1:175159675-175160151:mpeak_14235|chr1_175130282_175162229_KIAA0040_NM_-|	46.0806	-2.36181	0.655015	3.60573	0.000311277	0.0122239	41.6632	33.3044	28.0946	45.2195	16.7188	38.2541	104.93	85.0452	104.351	18.5516	19.1072	17.7275	35.0163	180.898	0.040743	2.40982	-2.36907	KIAA0040	-	chr1_175190613_-
chr2:217000471-217000663:mpeak_108388|chr2_216974019_217069910_XRCC5_NM_+|	459.122	-3.48274	0.966455	3.60362	0.000313815	0.0122728	4.62925	0.594722	2.00676	10.4353	12.7381	6.53118	2038.41	1163.28	568.916	721.194	384.532	596.204	0.191766	1.74535	-2.03847	1.14762	-3.1861	XRCC5	chr2:217000534:+	-
chr2:157349188-157349408:mpeak_104767|chr2_157291964_157439304_GPD2_NM_+|	50.6258	-3.22501	0.897297	3.59414	0.000325462	0.0125474	3.08616	1.78417	3.01014	5.79738	11.942	13.9954	182.084	115.376	91.3074	40.5816	46.1756	92.3696	2.02704	17.7164	-2.00971	1.11792	-3.12764	GPD2	-	chr2_156492775_+
chr18:47797350-47797880:mpeak_87521|chr18_47794033_47808144_MBD1_NM_-|	27.4763	-5.12757	1.4272	3.59275	0.000327201	0.0125775	70.9818	44.6041	74.25	31.3058	15.9226	60.6467	9.25849	10.705	12.0405	0	0	0	593.163	#DIV/0!	0.81539	Inf	-Inf	MBD1	chr18:47797353:-;chr18:47797412:-;chr18:47797534:-	chr18_50271043_-;chr18_50271078_-;chr18_50271172_-;chr18_50271290_-
chr5:141310992-141311173:mpeak_150749|chr5_141303384_141318085_KIAA0141_NM_+|	73.7501	-2.3114	0.643404	3.59245	0.000327581	0.0125775	7.71541	14.2733	7.02365	90.4391	74.0402	49.4504	101.843	101.103	63.2128	125.223	126.585	124.092	10.9004	56.9112	-2.8824	-0.498064	-2.38433	KIAA0141	-	chr5_141931595_+
chr14:24571073-24571124:mpeak_54073|chr14_24563339_24572718_PCK2_NM_+|	71.5999	-3.22527	0.898815	3.58836	0.000332766	0.0126701	6.17233	1.78417	4.01351	18.5516	8.75745	9.33026	316.332	181.39	99.3345	107.831	58.1176	47.5843	2.00484	17.1586	-1.61397	1.48341	-3.09738	PCK2	chr14:24571163:+	chr14_24101950_+
chr1:115290829-115292011:mpeak_8976|chr1_115260837_115300671_CSDE1_NM_-|	7010.52	-2.24428	0.625643	3.58716	0.000334301	0.012688	378.055	560.228	504.699	655.104	1097.87	964.749	29696.6	16494	11040.2	10525.7	6443.89	5765.17	2.52134	11.954	-0.913342	1.33189	-2.24523	CSDE1	-	chr1_114748309_-
chr9:132260172-132260386:mpeak_188624|chr9_132250938_132275697_LINC00963_NR_+|	10.004	-4.06407	1.13424	3.58307	0.000339577	0.0127448	7.71541	8.3261	3.01014	38.2627	11.1458	21.4596	6.17233	7.73138	11.0372	0	2.38839	2.79908	76.3873	910.76	-1.89522	2.26541	-4.16063	LINC00963	chr9:132260268:+	-
chr16:68857089-68857429:mpeak_72648|chr16_68771194_68867192_CDH1_NM_+|	1957.07	-2.88212	0.804458	3.58268	0.000340085	0.0127448	16.9739	24.3836	10.0338	31.3058	24.6801	25.1917	11085.5	5416.73	2784.38	1493.4	624.167	1948.16	0.266461	1.99663	-0.659558	2.24601	-2.90557	CDH1	chr16:68857158:+;chr16:68857199:+;chr16:68857408:+	chr16_68823256_+;chr16_68823295_+;chr16_68823504_+
chr2:217008725-217009045:mpeak_108393|chr2_216974019_217069910_XRCC5_NM_+|	469.188	-2.61083	0.731165	3.57079	0.000355912	0.0130701	10.8016	16.6522	14.0473	25.5085	42.195	48.5174	2038.41	1163.28	568.916	721.194	384.532	596.204	1.10065	6.82877	-1.48565	1.14762	-2.63327	XRCC5	-	chr2_216144313_+
chr7:44837629-44837949:mpeak_165990|chr7_44836234_44840885_PPIA_NM_+|	389.41	-2.66723	0.747763	3.56695	0.000361165	0.0131312	30.8616	14.2733	35.1182	132.18	66.0789	78.3742	1382.6	877.215	524.767	818.59	406.823	306.033	2.88205	18.0635	-1.78534	0.862567	-2.64791	PPIA	chr7:44837764:+	chr7_44798136_+;chr7_44798170_+;chr7_44798272_+
chr19:54681967-54682146:mpeak_94257|chr19_54678125_54693733_MBOAT7_NM_-|	158.543	-3.62412	1.01632	3.56592	0.000362579	0.0131625	1.54308	2.37889	0	9.2758	16.7188	5.59816	540.079	403.221	224.757	318.856	247.597	132.49	0.503653	4.52008	-3.00994	0.740865	-3.75081	MBOAT7	chr19:54681977:-;chr19:54682042:-	chr19_54178261_-;chr19_54178326_-
chr7:80408144-80408364:mpeak_167782|chr7_80374623_80548667_SEMA3C_NM_-|	218.428	-2.5115	0.704764	3.56361	0.000365792	0.0132085	9.25849	22.5994	21.0709	19.7111	30.253	60.6467	819.376	523.95	468.578	150.732	252.374	242.587	2.92117	17.1306	-1.06337	1.48859	-2.55195	SEMA3C	-	chr7_80778810_-
chr12:116702386-116702595:mpeak_47085|chr12_116399203_116714991_MED13L_NM_-|	330.749	-2.19268	0.616062	3.55919	0.000371997	0.0133716	77.1541	180.795	160.541	169.283	441.853	325.626	655.81	548.928	552.862	275.955	272.277	307.899	23.8103	109.418	-1.16249	1.0377	-2.20019	MED13L	-	chr12_116264730_-
chr7:1062058-1062191:mpeak_163457|chr7_1037440_1177893_C7orf50_NM_-|	126.244	-2.95075	0.829166	3.5587	0.000372689	0.0133864	12.3447	29.1414	21.0709	124.064	109.866	84.9054	408.917	162.954	117.395	275.955	95.5358	72.776	9.07589	71.7666	-2.34957	0.633633	-2.9832	C7orf50	chr7:1062116:-	chr7_1022479_-
chr3:120318188-120318320:mpeak_127416|chr3_120315127_120319957_NDUFB4_NM_+|	169.027	-2.72435	0.76662	3.55371	0.000379835	0.013521	4.62925	16.0575	13.0439	22.03	42.9911	62.5128	637.293	271.788	298.003	301.464	156.042	202.467	2.79439	19.3241	-1.91875	0.871049	-2.7898	NDUFB4	-	chr3_120599454_+
chr3:124838438-124838562:mpeak_127969|chr3_124802896_124931609_SLC12A8_NM_-|	10.9081	-5.39046	1.5184	3.55009	0.000385098	0.0136405	0	0	0	4.6379	2.38839	7.46421	35.4909	19.6258	16.0541	24.349	8.75745	12.1293	#DIV/0!	32.0333	-Inf	0.653821	-Inf	SLC12A8	-	chr3_125119597_-
chr14:21687550-21688330:mpeak_53679|chr14_21679465_21737638_HNRNPC_NM_-mpeak_53679|chr14_21679465_21737638_HNRNPC_NM_-||	553.54	-2.49501	0.703031	3.54894	0.000386791	0.013676	111.102	111.808	112.378	205.227	283.423	306.033	2306.91	1033.03	540.821	789.603	436.28	405.866	8.63975	48.7013	-1.24498	1.24992	-2.4949	HNRNPC	-	chr14_21219640_-
chr18:21695624-21695685:mpeak_86524|chr18_21572736_21712448_TTC39C_NM_+|	5.40261	-5.7763	1.62853	3.54694	0.00038973	0.01374	0	0.594722	0	8.11633	10.3497	0.933026	9.25849	11.8944	12.0405	5.79738	3.98066	1.86605	5.37505	166.6	-5.02763	1.5113	-6.53893	TTC39C	-	chr18_24115766_+
chr15:101824664-101824780:mpeak_67491|chr15_101821987_101835460_SNRPA1_NM_-mpeak_67491|chr15_101821987_101835460_SNRPA1_NM_-||	79.8251	-2.4675	0.69599	3.54531	0.000392148	0.0137733	27.7755	48.1725	38.1284	140.297	161.615	83.9724	141.964	78.5033	65.2196	71.8875	29.4569	70.91	39.9306	224.02	-1.75817	0.729892	-2.48806	SNRPA1	-	chr15_101284507_-;chr15_101284535_-
chr6:33678257-33678501:mpeak_155650|chr6_33665527_33679528_UQCC2_NM_-|	40.0823	-3.41	0.962272	3.5437	0.000394559	0.0138069	1.54308	3.56833	2.00676	56.8143	10.3497	15.8614	91.0418	54.1197	51.1723	78.8443	65.2828	50.3834	3.62554	42.6843	-3.54398	0.0134605	-3.55744	UQCC2	-	chr6_33710656_-
chr10:102045468-102045763:mpeak_26221|chr10_102035250_102046469_BLOC1S2_NM_-|	299.045	-2.08134	0.587964	3.53991	0.000400267	0.0139079	75.611	115.376	77.2601	140.297	98.7203	109.164	1047.75	579.259	651.193	321.175	165.595	207.132	11.7745	50.1773	-0.376274	1.71509	-2.09137	BLOC1S2	-	chr10_100285881_-
chr3:15299516-15299579:mpeak_121742|chr3_15295690_15305802_SH3BP5-AS1_NR_+|	8.48465	-5.06911	1.43251	3.53863	0.000402204	0.0139411	0	2.97361	1.00338	0	15.9226	12.1293	4.62925	26.1678	28.0946	4.6379	1.59226	4.66513	10.1296	386.203	-2.81835	2.43436	-5.25271	SH3BP5-AS1	chr3:15299569:+	chr3_15258072_+
chr1:155282720-155282877:mpeak_12287|chr1_155278538_155290199_FDPS_NM_+|	487.559	-2.32376	0.656761	3.53821	0.000402848	0.013951	27.7755	30.9255	30.1014	178.559	101.905	184.739	1291.56	835.584	467.574	1211.65	877.337	612.998	3.42243	17.2171	-2.38919	-0.0584429	-2.33075	FDPS	-	chr1_155312967_+
chr11:249221-249494:mpeak_28608|chr11_236807_252504_PSMD13_NM_+|	202.356	-2.8401	0.804659	3.52957	0.000416239	0.0142101	4.62925	5.3525	3.01014	23.1895	11.1458	17.7275	742.222	453.773	335.128	437.122	199.033	195.936	0.848519	6.25687	-2.00264	0.879778	-2.88242	PSMD13	-	chr11_249495_+;chr11_249520_+
chr19:49304425-49304574:mpeak_93383|chr19_49298721_49314320_BCAT2_NM_-|	29.831	-3.72305	1.05705	3.5221	0.000428136	0.0144755	1.54308	1.18944	3.01014	17.3921	17.5149	12.1293	104.93	61.2563	20.0676	68.409	26.2723	24.2587	3.08325	39.5463	-3.03399	0.647033	-3.68102	BCAT2	-	chr19_48801267_-
chr10:7832820-7832965:mpeak_19697|chr10_7830092_7849621_ATP5C1_NM_+|	83.1781	-2.66847	0.758159	3.51967	0.00043209	0.0145578	21.6031	14.2733	19.0642	63.7711	27.0685	62.5128	260.781	149.275	137.463	63.7711	41.3988	137.155	10.0345	63.2838	-1.4809	1.17597	-2.65687	ATP5C1	-	chr10_7790993_+
chr13:93922094-93922235:mpeak_52420|chr13_93879077_95055268_GPC6_NM_+|	14.6165	-3.69155	1.04899	3.51913	0.000432956	0.0145716	6.17233	7.13666	14.0473	19.7111	59.7099	38.2541	12.3447	7.73138	3.01014	1.15948	2.38839	3.7321	118.496	1616.42	-2.10486	1.66502	-3.76989	GPC6	-	chr13_93269886_+
chr9:117355275-117355611:mpeak_187041|chr9_117349993_117359849_ATP6V1G1_NM_+|	341.393	-2.70155	0.768695	3.51447	0.000440639	0.0147156	6.17233	8.3261	4.01351	26.6679	13.5342	13.9954	1438.15	587.585	784.642	490.458	249.189	473.977	0.658699	4.46576	-1.54977	1.21144	-2.76121	ATP6V1G1	chr9:117355631:+	chr9_114593349_+
chr11:6234023-6234313:mpeak_29077|chr11_6233097_6255941_FAM160A2_NM_-|	55.3358	-2.11633	0.602685	3.5115	0.000445586	0.0148276	13.8877	17.2469	9.03041	47.5385	41.3988	32.6559	95.6711	102.887	99.3345	68.409	55.7292	80.2403	13.4831	59.4941	-1.59805	0.543548	-2.1416	FAM160A2	-	chr11_6212821_-
chr3:183701521-183701644:mpeak_132320|chr3_183639189_183735727_ABCC5_NM_-|	242.162	-2.04105	0.582079	3.50649	0.000454063	0.0149837	58.6371	70.7719	49.1655	115.948	102.701	181.007	560.139	506.108	443.493	266.679	174.353	376.943	11.8282	48.8592	-1.16223	0.884172	-2.0464	ABCC5	chr3:183701541:-	chr3_183983754_-
chr19:39333008-39333183:mpeak_92068|chr19_39327420_39342979_HNRNPL_NM_-mpeak_92068|chr19_39327420_39342979_HNRNPL_NM_-||	98.6794	-2.55286	0.728258	3.50543	0.00045587	0.0149837	50.9217	29.7361	31.1047	134.499	96.3319	75.5751	308.616	142.139	70.2365	90.4391	72.448	82.1063	21.4519	125.067	-1.45501	1.08852	-2.54353	HNRNPL	chr19:39333049:-	chr19_38842479_-;chr19_38842538_-
chr2:202006163-202006329:mpeak_107369|chr2_201980826_202027718_CFLAR_NM_+|	230.494	-2.1403	0.611399	3.50065	0.00046412	0.0151591	81.7833	71.9613	41.1385	173.921	97.9242	69.0439	435.149	516.218	645.172	188.994	214.159	230.457	12.2066	53.801	-0.806694	1.33328	-2.13997	CFLAR	chr2:202006216:+;chr2:202006321:+	chr2_201141490_+;chr2_201141537_+;chr2_201141596_+
chr6:17398099-17398255:mpeak_154008|chr6_17393735_17556589_CAP2_NM_+|	74.7927	-2.42597	0.693119	3.50007	0.000465133	0.0151714	7.71541	6.54194	4.01351	28.9869	26.2723	13.0624	189.799	136.786	150.507	91.5985	137.731	104.499	3.82963	20.4661	-1.9028	0.515161	-2.41796	CAP2	chr6:17398256:+	-
chr4:141674111-141674366:mpeak_140342|chr4_141544071_141677471_TBC1D9_NM_-|	175.829	-2.37645	0.679745	3.49609	0.000472138	0.0152949	106.473	167.117	106.358	318.856	621.779	365.746	137.334	77.3138	41.1385	69.5685	52.5447	45.7183	148.541	778.388	-1.7817	0.607927	-2.38963	TBC1D9	-	chr4_140753060_-
chr5:176500189-176500302:mpeak_152375|chr5_176449680_176506382_ZNF346_NM_+|	9.37595	-3.56695	1.02168	3.49124	0.000480786	0.0154507	3.08616	2.97361	7.02365	5.79738	11.1458	6.53118	26.2324	17.8417	22.0743	1.15948	3.98066	4.66513	19.7789	239.406	-0.843348	2.75408	-3.59743	ZNF346	chr5:176500259:+;chr5:176500299:+	chr5_177073295_+
chr11:35219123-35219351:mpeak_30782|chr11_35160416_35250675_CD44_NM_+|	73.845	-3.31099	0.950719	3.48261	0.000496545	0.015753	1.54308	15.4628	9.03041	11.5948	91.5551	70.91	226.833	117.16	76.2568	107.831	85.1861	72.776	6.19542	65.4869	-2.74099	0.660943	-3.40193	CD44	-	chr11_35197827_+
chr6:18249582-18249739:mpeak_154153|chr6_18225961_18264799_DEK_NM_-|	30.5585	-2.74335	0.789136	3.47639	0.000508209	0.0159441	12.3447	26.1678	13.0439	46.379	87.5745	60.6467	23.1462	19.6258	35.1182	10.4353	7.96132	24.2587	66.191	456.216	-1.91629	0.868719	-2.78501	DEK	-	chr6_18249381_-
chr2:198281613-198281864:mpeak_107085|chr2_198257185_198299817_SF3B1_NM_-|	132.394	-2.49598	0.718451	3.47411	0.000512545	0.01602	4.62925	7.73138	7.02365	33.6248	14.3304	11.1963	276.212	357.428	365.23	127.542	166.391	217.395	1.94062	11.5682	-1.60953	0.966044	-2.57557	SF3B1	-	chr2_197416889_-
chr5:73207467-73207527:mpeak_146004|chr5_72921982_73236668_ARHGEF28_NM_+|	6.3059	-5.22164	1.50372	3.47247	0.000515695	0.016071	0	1.78417	0	2.31895	6.36905	4.66513	30.8616	14.868	7.02365	2.31895	0.796132	4.66513	10.1463	171.629	-2.90386	2.76138	-5.66524	ARHGEF28	chr5:73207522:+	chr5_73911696_+
chr11:68536508-68536619:mpeak_33326|chr11_68522319_68609399_CPT1A_NM_-|	25.585	-2.69976	0.780083	3.46087	0.000538439	0.01652	29.3186	19.6258	15.0507	68.409	46.9718	42.9192	23.1462	24.3836	13.0439	13.9137	5.57292	4.66513	105.648	655.439	-1.30663	1.32656	-2.63319	CPT1A	-	chr11_68769040_-
chr5:32405449-32405622:mpeak_143534|chr5_32356045_32444844_ZFR_NM_-|	51.9187	-2.31353	0.668987	3.45826	0.000543674	0.0166056	9.25849	13.6786	15.0507	28.9869	37.4182	40.1201	149.679	99.3185	59.1993	67.2496	51.7485	51.3164	12.3258	62.5461	-1.48759	0.85565	-2.34324	ZFR	-	chr5_32405395_-
chr16:81683928-81684031:mpeak_74203|chr16_81478774_81743350_CMIP_NM_+|	147.214	-3.70546	1.07479	3.44762	0.000565553	0.0170009	0	1.18944	1.00338	13.9137	10.3497	3.7321	399.658	283.088	283.956	293.347	273.869	202.467	0.340253	3.63728	-3.67434	0.328806	-4.00314	CMIP	-	chr16_81650428_+
chr4:106820087-106820507:mpeak_138955|chr4_106816596_106890051_NPNT_NM_+|	108.558	-2.40729	0.6983	3.44736	0.000566086	0.0170062	7.71541	8.92083	9.03041	17.3921	13.5342	28.9238	418.175	248.594	182.615	104.353	133.75	129.691	3.0218	16.2728	-1.22146	1.20752	-2.42898	NPNT	-	chr4_105899288_+
chr8:48711705-48711854:mpeak_174771|chr8_48686938_48872743_PRKDC_NM_-|	287.515	-2.19661	0.638753	3.43891	0.000584059	0.0171772	13.8877	10.1103	15.0507	27.8274	32.6414	24.2587	1087.87	699.988	455.534	415.092	353.482	314.43	1.74061	7.82337	-1.11756	1.05064	-2.1682	PRKDC	chr8:48711704:-	chr8_47799144_-
chr6:152292765-152293176:mpeak_162347|chr6_152011630_152419866_ESR1_NM_+|	1042.23	-2.96077	0.860948	3.43896	0.000583949	0.0171772	15.4308	39.2516	44.1487	15.0732	101.905	171.677	2464.3	2516.27	3855.98	869.606	1284.16	1128.96	1.11844	8.79314	-1.54631	1.42859	-2.9749	ESR1	-	chr6_151971783_+
chr3:131208727-131208788:mpeak_128708|chr3_131181719_131221860_MRPL3_NM_-|	150.742	-3.20674	0.932725	3.43804	0.000585946	0.0172142	6.17233	1.78417	1.00338	6.95685	8.75745	14.9284	729.878	293.198	212.716	214.503	136.138	182.873	0.725031	5.74356	-1.77399	1.21184	-2.98583	MRPL3	chr3:131208728:-	chr3_131489887_-
chr1:8842334-8842540:mpeak_662|chr1_8415180_8877699_RERE_NM_-|	62.3858	-2.63514	0.767138	3.43503	0.000592484	0.0173392	15.4308	39.8464	57.1926	48.698	135.342	97.9678	100.3	63.0405	90.3041	18.5516	33.4375	48.5174	44.3414	280.587	-1.3262	1.33552	-2.66172	RERE	-	chr1_8782431_-
chr3:107802555-107803332:mpeak_126799|chr3_107766139_107809935_CD47_NM_-|	164.026	-2.61904	0.762724	3.4338	0.000595194	0.0173703	15.4308	64.8247	58.1959	78.8443	238.043	168.878	444.408	223.615	192.649	162.327	145.692	175.409	16.0864	100.484	-1.81088	0.832163	-2.64304	CD47	-	chr3_108083921_-
chr8:98669300-98669546:mpeak_177340|chr8_98656406_98736827_MTDH_NM_+|	357.466	-2.39963	0.699229	3.43182	0.000599546	0.0174175	1.54308	22.5994	14.0473	34.7843	46.9718	33.5889	1182	825.474	696.345	540.315	483.252	408.665	1.41244	8.05351	-1.5947	0.916733	-2.51143	MTDH	-	chr8_97657150_+
chr15:52159122-52159521:mpeak_63081|chr15_52121824_52200972_TMOD3_NM_+|	126.051	-1.84117	0.536634	3.43095	0.000601461	0.0174387	75.611	109.429	105.355	102.034	136.935	126.892	262.324	157.601	214.723	75.3659	60.506	85.8384	45.7568	165.017	-0.333277	1.51728	-1.85056	TMOD3	-	chr15_51867070_+
chr9:111633172-111633324:mpeak_186329|chr9_111631462_111696608_IKBKAP_NM_-|	36.5712	-2.78969	0.813334	3.42994	0.000603716	0.0174743	4.62925	2.37889	5.01689	11.5948	11.942	23.3257	92.5849	77.9086	67.2264	37.1032	34.2337	70.91	5.05849	32.9444	-1.96239	0.740865	-2.70326	IKBKAP	-	chr9_108871016_-
chr1:154230112-154230174:mpeak_12096|chr1_154192647_154243356_UBAP2L_NM_+|	40.6223	-2.3258	0.678614	3.42728	0.000609662	0.0175503	10.8016	10.1103	16.0541	33.6248	27.0685	26.1247	123.447	59.4722	65.2196	46.379	31.8453	37.321	14.8973	75.1376	-1.2318	1.10269	-2.33448	UBAP2L	chr1:154230202:+	chr1_154257724_+
chr4:42548688-42549052:mpeak_135939|chr4_42415030_42659122_ATP8A1_NM_-|	11.5366	-3.54372	1.03412	3.4268	0.000610739	0.01756	4.62925	4.75777	7.02365	3.47843	15.9226	15.8614	13.8877	17.2469	42.1419	2.31895	5.57292	5.59816	22.3955	261.397	-1.1035	2.44146	-3.54496	ATP8A1	-	chr4_42546727_-
chr8:102507601-102507682:mpeak_178037|chr8_102504667_102678816_GRHL2_NM_+|	183.35	-2.2252	0.650096	3.42288	0.000619618	0.0177325	4.62925	8.3261	8.02703	23.1895	24.6801	17.7275	586.371	385.38	317.068	307.261	240.432	277.109	1.62803	7.95308	-1.64445	0.64393	-2.28838	GRHL2	chr8:102507681:+	chr8_101495452_+
chr4:110649139-110649519:mpeak_139197|chr4_110635651_110651242_PLA2G12A_NM_-|	48.4838	-2.45135	0.717684	3.41564	0.000636327	0.0179761	1.54308	6.54194	4.01351	27.8274	19.9033	27.0578	91.0418	64.8247	92.3108	64.9306	87.5745	94.2356	4.87496	30.3105	-2.62798	0.00837538	-2.63636	PLA2G12A	chr4:110649448:-	chr4_109728293_-
chr12:76465788-76465999:mpeak_43929|chr12_76442244_76478813_NAP1L1_NM_-|	298.287	-2.169	0.635549	3.41279	0.000643003	0.0181153	86.4126	130.244	177.598	168.124	354.279	250.984	742.222	506.108	432.456	188.994	190.275	351.751	23.4566	105.795	-0.972062	1.20115	-2.17321	NAP1L1	-	chr12_76072099_-
chr15:74317342-74317427:mpeak_65243|chr15_74287013_74336561_PML_NM_+|	67.6528	-2.65583	0.781036	3.40039	0.0006729	0.0185642	49.3786	48.1725	27.0912	38.2627	12.7381	10.2633	199.058	248.594	133.449	19.7111	16.7188	8.39724	21.4494	136.668	1.02468	3.69635	-2.67167	PML	-	chr15_74025103_+
chr2:143638864-143638980:mpeak_104298|chr2_143635194_143799615_KYNU_NM_+|	10.4111	-3.9257	1.15615	3.39549	0.000685063	0.0187807	3.08616	0.594722	1.00338	8.11633	7.96132	5.59816	37.034	20.8153	14.0473	13.9137	7.16518	5.59816	6.51529	81.2526	-2.21019	1.43032	-3.64051	KYNU	-	chr2_142881401_+
chr19:8055432-8055482:mpeak_89227|chr19_8028691_8070529_ELAVL1_NM_-|	93.2307	-4.90244	1.44462	3.3936	0.000689816	0.0188317	0	1.18944	0	11.5948	0.796132	4.66513	536.992	158.196	140.473	129.861	34.2337	100.767	0.427007	6.43959	-3.84192	1.65768	-5.4996	ELAVL1	chr19:8055409:-	-
chr1:193026285-193026624:mpeak_15377|chr1_192989586_193029237_UCHL5_NR_-mpeak_15377|chr1_192985525_193028523_UCHL5_NM_-||	62.1541	-1.95363	0.577381	3.38361	0.00071539	0.0192767	37.034	23.7889	39.1318	78.8443	90.759	83.0393	61.7233	78.5033	96.3243	42.9006	65.2828	48.5174	42.255	161.226	-1.33775	0.594139	-1.93189	UCHL5	chr1:193026400:-	chr1_193057268_-
chr20:52825510-52825719:mpeak_114440|chr20_52824501_52835557_PFDN4_NM_+|	226.165	-1.91794	0.566812	3.38373	0.000715092	0.0192767	126.533	186.743	153.517	355.959	284.219	255.649	410.46	221.831	265.895	135.659	112.255	205.266	51.9705	197.676	-0.94044	0.986934	-1.92737	PFDN4	-	chr20_54209071_+
chr17:27862277-27862373:mpeak_78207|chr17_27717942_27869578_TAOK1_NM_+|	149.675	-2.86824	0.84815	3.38176	0.00072022	0.0193398	1.54308	1.78417	6.02027	5.79738	14.3304	20.5266	217.575	335.423	531.791	234.214	196.644	230.457	0.861691	6.14749	-2.12075	0.714002	-2.83476	TAOK1	-	chr17_29535348_+
chr16:22218146-22218220:mpeak_69973|chr16_22217591_22295207_EEF2K_NM_+|	94.642	-3.68615	1.09009	3.38152	0.000720863	0.0193445	0	0.594722	3.01014	13.9137	1.59226	3.7321	273.125	189.122	341.149	133.34	77.2248	98.9008	0.673054	6.21655	-2.41595	1.37633	-3.79228	EEF2K	chr16:22218242:+	chr16_22206923_+
chr1:201474583-201474684:mpeak_15882|chr1_201453917_201476387_CSRP1_NM_-|	33.9672	-5.14316	1.52227	3.37861	0.00072854	0.0194643	0	0	0	9.2758	3.98066	1.86605	128.076	60.6616	33.1115	83.4822	62.8944	24.2587	#DIV/0!	8.86248	-Inf	0.378661	-Inf	CSRP1	chr1:201474565:-	-
chr2:198355080-198355212:mpeak_107118|chr2_198351922_198364998_HSPD1_NM_-|	1112.39	-2.37985	0.70451	3.37801	0.000730115	0.0194954	30.8616	19.6258	22.0743	56.8143	58.1176	81.1733	4584.5	2662.57	1317.44	2212.28	1174.29	1128.96	0.847239	4.3429	-1.43435	0.923472	-2.35782	HSPD1	-	chr2_197490451_-
chr3:12879090-12879410:mpeak_121474|chr3_12877722_12883081_RPL32_NM_-|	729.033	-2.65668	0.787003	3.37569	0.000736302	0.0195836	32.4047	19.0311	14.0473	107.831	41.3988	30.7899	3115.48	1444.58	1338.51	1292.81	571.622	739.89	1.11015	6.91234	-1.45896	1.17945	-2.63842	RPL32	-	chr3_12837660_-
chr10:89452056-89452310:mpeak_25036|chr10_89419475_89505588_PAPSS2_NM_+|	120.829	-3.23444	0.958238	3.3754	0.000737082	0.0195881	4.62925	14.2733	2.00676	8.11633	59.7099	20.5266	422.804	347.912	170.574	141.456	171.168	86.7714	2.22135	22.1216	-2.07913	1.23682	-3.31595	PAPSS2	-	chr10_87692452_+
chr4:169812894-169813017:mpeak_141724|chr4_169418216_169847363_PALLD_NM_+|	205.298	-3.23714	0.95906	3.37532	0.000737291	0.0195881	3.08616	1.78417	1.00338	9.2758	13.5342	6.53118	874.927	423.442	247.834	324.653	333.579	223.926	0.379879	3.32607	-2.32059	0.809621	-3.13021	PALLD	-	chr4_168891811_+
chr17:80418589-80418753:mpeak_85177|chr17_80416059_80445791_NARF_NM_+|	81.3909	-2.03066	0.602302	3.3715	0.00074759	0.0197413	32.4047	14.868	20.0676	17.3921	16.7188	18.6605	249.979	212.316	251.848	49.8574	42.195	50.3834	9.42953	37.0493	0.351714	2.3259	-1.97419	NARF	chr17:80418672:+	chr17_82460814_+
chr5:131713976-131714034:mpeak_149414|chr5_131705400_131729876_SLC22A5_NM_+|	18.6423	-3.91892	1.16432	3.36584	0.000763104	0.0200056	0	0.594722	2.00676	22.03	8.75745	7.46421	35.4909	39.8464	20.0676	38.2627	28.6607	20.5266	4.09017	43.7412	-3.87812	0.125604	-4.00372	SLC22A5	-	chr5_132378360_+
chr1:150600594-150600751:mpeak_11421|chr1_150595335_150602098_ENSA_NM_-|	461.237	-2.26826	0.674486	3.36295	0.000771144	0.0201287	61.7233	62.4458	52.1757	281.752	131.362	133.423	1546.17	718.424	666.243	840.62	400.454	640.056	6.01688	29.0537	-1.63192	0.639713	-2.27163	ENSA	-	chr1_150628159_-
chr17:40688799-40688933:mpeak_79544|chr17_40687950_40695045_NAGLU_NM_+|	54.8525	-4.85832	1.44642	3.35885	0.000782674	0.0202597	1.54308	0	0	19.7111	3.18453	3.7321	166.653	97.5344	78.2635	134.499	97.128	55.9816	1.3518	9.25831	-4.10904	0.251789	-4.36083	NAGLU	chr17:40688935:+	chr17_42536921_+
chr12:52580702-52580864:mpeak_41325|chr12_52565341_52585784_KRT80_NM_-|	203.533	-5.06221	1.51161	3.3489	0.00081134	0.0205344	0	0	0	17.3921	3.98066	3.7321	640.379	272.977	113.382	634.233	463.349	292.97	#DIV/0!	1.80539	-Inf	-0.437589	-Inf	KRT80	-	chr12_52186915_-
chr1:19670662-19670725:mpeak_1561|chr1_19666111_19812135_CAPZB_NM_-|	212.814	-4.12605	1.23229	3.34827	0.000813188	0.0205593	1.54308	0	2.00676	1.15948	9.55358	1.86605	1138.79	462.099	410.382	211.024	92.3513	222.993	0.264745	2.38979	-1.8252	1.93396	-3.75917	CAPZB	chr1:19670673:-	chr1_19344181_-
chr18:33597251-33597497:mpeak_86977|chr18_33573263_33647557_RPRD1A_NM_-|	29.6956	-2.25182	0.67317	3.34509	0.000822552	0.0206488	7.71541	21.41	16.0541	41.7411	55.7292	43.8522	30.8616	30.3308	43.1453	22.03	23.8839	19.5936	43.3012	215.735	-1.64525	0.671528	-2.31678	RPRD1A	-	chr18_36017372_-
chr18:55108431-55108499:mpeak_87693|chr18_55102916_55143668_ONECUT2_NM_+|	39.6272	-3.51946	1.05262	3.34352	0.000827239	0.0207153	1.54308	3.56833	0	13.9137	2.38839	4.66513	80.2403	115.376	150.507	16.2327	46.9718	40.1201	2.21514	20.2926	-2.03634	1.7441	-3.78044	ONECUT2	chr18:55108490:+	chr18_57441256_+
chr2:132245792-132245903:mpeak_103309|chr2_132241791_132250064_MZT2A_NM_-|	115.001	-3.26081	0.976261	3.34011	0.000837466	0.0208058	6.17233	2.37889	2.00676	31.3058	6.36905	13.0624	464.468	201.611	190.642	260.882	121.808	79.3072	1.23237	10.9822	-2.26471	0.89094	-3.15565	MZT2A	chr2:132245821:-	-
chr22:19955165-19955228:mpeak_117902|chr22_19929262_19956058_COMT_NM_+|	128.827	-3.36167	1.00859	3.33304	0.000859011	0.0210356	9.25849	0.594722	2.00676	17.3921	7.96132	2.79908	606.431	280.114	294.993	84.6417	70.8557	168.878	1.00377	8.679	-1.24716	1.86493	-3.1121	COMT	chr22:19955217:+	chr22_19967693_+
chr19:47279996-47280201:mpeak_93038|chr19_47279004_47291842_SLC1A5_NM_-|	1388.62	-2.96173	0.889057	3.33131	0.000864377	0.0211166	67.8956	40.4411	21.0709	199.43	89.1667	57.8476	7130.58	3620.67	1276.3	2189.09	870.968	1100.04	1.07593	8.32779	-1.4207	1.53165	-2.95235	SLC1A5	chr19:47280036:-	chr19_46776737_-;chr19_46776888_-
chr20:21309845-21309943:mpeak_111399|chr20_21283941_21369910_XRN2_NM_+|	12.4547	-3.51509	1.05649	3.32715	0.000877391	0.0212404	6.17233	11.2997	5.01689	17.3921	25.4762	7.46421	29.3186	23.1941	12.0405	1.15948	1.59226	9.33026	34.8378	416.591	-1.16228	2.41763	-3.57991	XRN2	-	chr20_21329301_+
chr1:207251035-207251170:mpeak_16800|chr1_207226619_207252298_PFKFB2_NM_+|	18.3204	-4.773	1.43507	3.32596	0.000881138	0.0212708	24.6893	37.4675	40.1351	23.1895	31.0491	49.4504	3.08616	4.75777	6.02027	0	0	0	737.813	#DIV/0!	-0.019571	Inf	-Inf	PFKFB2	chr1:207251162:+	chr1_207077777_+;chr1_207077816_+
chr17:38305740-38305879:mpeak_79291|chr17_38296506_38326699_CASC3_NM_+|	153.232	-2.21395	0.669005	3.30932	0.000935236	0.0221232	7.71541	20.2205	17.0574	80.0038	51.7485	45.7183	412.003	254.541	224.757	333.929	172.761	218.328	5.04806	24.4781	-1.9798	0.297896	-2.27769	CASC3	-	chr17_40149537_+
chr1:53732538-53732634:mpeak_5049|chr1_53712728_53793821_LRP8_NM_-|	186.06	-2.8376	0.857888	3.30765	0.000940814	0.0221502	1.54308	2.37889	1.00338	15.0732	12.7381	7.46421	393.486	297.361	449.514	368.713	279.442	404	0.431912	3.35269	-2.84037	0.116142	-2.95651	LRP8	-	chr1_53266842_-
chr12:58142891-58142992:mpeak_42394|chr12_58142400_58146230_CDK4_NM_-|	258.711	-3.32265	1.0055	3.30447	0.000951568	0.0222701	0	2.37889	2.00676	18.5516	15.1265	5.59816	925.849	469.83	347.169	717.715	301.734	298.568	0.377455	2.97995	-3.1628	0.403078	-3.56587	CDK4	chr12:58142964:-	-
chr2:20503297-20503563:mpeak_95839|chr2_20451477_20550611_PUM2_NM_-|	90.1651	-2.06089	0.625065	3.29708	0.000976956	0.022582	7.71541	9.51555	7.02365	22.03	46.9718	39.1871	149.679	148.086	163.551	170.443	143.304	174.476	5.25771	22.1598	-2.15722	-0.0817853	-2.07544	PUM2	-	chr2_20303681_-
chr17:43180087-43180144:mpeak_79901|chr17_43138666_43182986_NMT1_NM_+|	26.1241	-5.01523	1.5213	3.29667	0.000978394	0.0225866	0	0	0	12.7542	3.98066	1.86605	83.3264	38.0622	24.0811	80.0038	35.8259	33.5889	#DIV/0!	12.4489	-Inf	-0.0386417	-Inf	NMT1	-	chr17_45102776_+
chr3:33042604-33042792:mpeak_122743|chr3_33038836_33138694_GLB1_NM_-|	227.59	-2.48398	0.754481	3.29231	0.000993692	0.022785	9.25849	17.2469	10.0338	31.3058	30.253	17.7275	996.831	612.563	291.983	340.886	196.644	176.342	1.92172	11.1065	-1.11763	1.41331	-2.53093	GLB1	-	chr3_33001249_-
chr22:50641284-50641486:mpeak_120592|chr22_50639407_50655633_SELO_NM_+|	33.1078	-2.19111	0.666111	3.28941	0.00100396	0.0229124	38.577	23.1941	27.0912	67.2496	51.7485	81.1733	27.7755	26.1678	18.0608	13.9137	11.1458	11.1963	123.413	552.108	-1.17159	0.989864	-2.16145	SELO	chr22:50641350:+	chr22_50202951_+
chr22:24148127-24148215:mpeak_118231|chr22_24129149_24176327_SMARCB1_NM_+|	77.0441	-4.95657	1.50745	3.28804	0.00100888	0.0229708	0	0	0	0	8.75745	4.66513	293.186	117.16	83.2804	206.387	96.3319	114.762	#DIV/0!	4.82271	-Inf	0.241709	-Inf	SMARCB1	-	chr22_23806049_+
chr22:33199162-33199257:mpeak_119106|chr22_33196801_33255166_TIMP3_NM_+|	8.65594	-3.37635	1.02717	3.28706	0.00101239	0.023003	1.54308	1.78417	3.01014	10.4353	22.2917	13.9954	9.25849	11.2997	9.03041	5.79738	7.96132	7.46421	21.4183	220.151	-2.88215	0.47942	-3.36157	TIMP3	-	chr22_32803277_+
chr6:30526008-30526149:mpeak_155065|chr6_30524485_30530165_PRR3_NM_+|	25.612	-2.6146	0.795625	3.28622	0.0010154	0.0230275	9.25849	13.6786	10.0338	24.349	18.311	14.9284	70.9818	32.115	66.223	25.5085	7.96132	13.9954	19.4726	121.328	-0.804587	1.83481	-2.6394	PRR3	chr6:30526109:+	chr6_30558419_+
chr6:151763453-151763555:mpeak_162116|chr6_151726402_151773316_RMND1_NM_-|	32.0819	-2.35265	0.71814	3.27604	0.00105275	0.0234605	4.62925	4.16305	11.0372	46.379	37.4182	58.7807	38.577	29.7361	24.0811	38.2627	40.6027	51.3164	21.4618	109.522	-2.84603	-0.494654	-2.35138	RMND1	-	chr6_151442318_-
chr10:61628315-61628468:mpeak_22969|chr10_61552869_61666414_CCDC6_NM_-|	30.7455	-3.29701	1.00637	3.27615	0.00105233	0.0234605	0	1.78417	2.00676	4.6379	6.36905	7.46421	115.731	58.8775	68.2297	26.6679	28.6607	48.5174	2.34163	17.7871	-2.28465	1.22555	-3.5102	CCDC6	-	chr10_59868542_-
chr10:79798861-79799004:mpeak_24488|chr10_79793517_79814288_RPS24_NM_+|	11.2485	-4.34421	1.32636	3.2753	0.00105551	0.023489	7.71541	14.868	10.0338	32.4653	23.0878	29.8568	4.62925	5.3525	5.01689	1.15948	0.796132	0	217.468	2911.63	-1.38877	2.93914	-4.32791	RPS24	chr10:79799003:+	-
chr19:46292643-46292707:mpeak_92962|chr19_46287548_46296060_DMWD_NM_-|	41.6133	-3.75311	1.14661	3.27323	0.00106327	0.0235979	0	0.594722	2.00676	10.4353	2.38839	6.53118	95.6711	102.887	117.395	81.1633	48.564	31.7229	1.23506	11.9881	-2.89529	0.968622	-3.86391	DMWD	chr19:46292656:-	chr19_45789400_-
chr13:113897651-113897711:mpeak_53369|chr13_113862506_113917800_CUL4A_NM_+|	68.2215	-2.94607	0.899973	3.27351	0.00106221	0.0235979	4.62925	0.594722	3.01014	13.9137	7.16518	11.1963	243.807	142.139	100.338	95.077	76.4286	120.36	1.69327	11.0582	-1.97074	0.736491	-2.70723	CUL4A	-	chr13_113243385_+
chr15:60686066-60686216:mpeak_63843|chr15_60639888_60690185_ANXA2_NM_-|	386.345	-2.67202	0.818412	3.26489	0.00109507	0.0239656	50.9217	57.688	30.1014	324.653	156.042	115.695	1285.39	736.86	310.044	838.301	467.329	263.113	5.94742	38.0171	-2.10417	0.572139	-2.67631	ANXA2	-	chr15_60393932_-;chr15_60393963_-
chr5:154169830-154169894:mpeak_151403|chr5_154092461_154193446_LARP1_NM_+|	271.071	-2.37171	0.726964	3.26249	0.0011044	0.0239831	6.17233	6.54194	8.02703	28.9869	13.5342	19.5936	972.142	666.683	380.28	499.734	315.268	335.889	1.02725	5.39709	-1.58243	0.810964	-2.39339	LARP1	chr5:154169886:+	-
chr21:44514048-44514317:mpeak_117091|chr21_44513359_44527688_U2AF1_NM_-|	584.372	-2.45613	0.754369	3.25587	0.00113045	0.0242818	13.8877	9.51555	7.02365	25.5085	25.4762	41.9862	2251.36	1099.05	1035.49	759.456	434.688	1309.04	0.693746	3.71411	-1.61143	0.809107	-2.42054	U2AF1	chr21:44514155:-	-
chr9:14248204-14248267:mpeak_182075|chr9_14088325_14398982_NFIB_NM_-|	89.0484	-3.27608	1.00667	3.25437	0.00113644	0.024349	0	2.97361	2.00676	0	15.1265	7.46421	316.332	192.095	229.774	71.8875	132.954	97.9678	1.01199	11.1906	-2.18141	1.2856	-3.46701	NFIB	-	chr9_14248218_-
chr12:112488939-112489081:mpeak_46675|chr12_112467457_112546635_NAA25_NM_-|	52.1364	-2.34729	0.721676	3.25256	0.00114371	0.0244232	4.62925	8.3261	7.02365	30.1464	29.4569	14.9284	67.8956	90.3977	153.517	73.0469	77.2248	69.0439	6.40742	33.9837	-1.89937	0.507659	-2.40703	NAA25	-	chr12_112051234_-
chr16:81092984-81093050:mpeak_74114|chr16_81087699_81110872_C16orf46_NM_-|	14.4016	-3.347	1.02958	3.25084	0.00115064	0.0244547	3.08616	4.16305	0	8.11633	11.1458	3.7321	35.4909	31.5203	43.1453	5.79738	7.96132	18.6605	9.87126	70.9279	-1.66538	1.76463	-3.43001	C16orf46	chr16:81092997:-	chr16_81059395_-
chr2:166609846-166609985:mpeak_105387|chr2_166605413_166650803_GALNT3_NM_-|	25.3756	-2.76369	0.850392	3.24991	0.00115443	0.0244871	10.8016	20.8153	22.0743	20.8706	80.4093	60.6467	30.8616	18.4364	13.0439	5.79738	9.55358	11.1963	86.1237	609.956	-1.59258	1.23164	-2.82422	GALNT3	-	chr2_165753425_-
chr9:91999554-91999605:mpeak_184725|chr9_91977343_92094611_SEMA4D_NM_-|	3.16673	-7.24165	2.23179	3.24477	0.00117545	0.0247673	1.54308	0	0	13.9137	2.38839	0.933026	0	8.3261	9.03041	0	0	1.86605	17.781	307.871	-3.48147	3.21742	-6.69888	SEMA4D	chr9:91999551:-	chr9_89384639_-
chr17:2295616-2295858:mpeak_75524|chr17_2290943_2304258_MNT_NM_-|	50.5414	-2.30103	0.710219	3.23989	0.00119577	0.024991	15.4308	11.8944	19.0642	141.456	109.866	41.9862	32.4047	48.1725	35.1182	48.698	50.1563	52.2495	40.0962	194.111	-2.66055	-0.385207	-2.27534	MNT	-	chr17_2392502_-
chr1:61607642-61607835:mpeak_5346|chr1_61542945_61920974_NFIA_NM_+|	118.962	-2.64526	0.81716	3.23714	0.00120736	0.0250729	1.54308	11.2997	11.0372	6.95685	24.6801	30.7899	262.324	309.255	390.314	69.5685	173.557	136.222	2.4826	16.4564	-1.38637	1.34236	-2.72872	NFIA	-	chr1_61142110_+
chr5:159536948-159537096:mpeak_151609|chr5_159505175_159546452_PWWP2A_NM_-|	12.6802	-2.99087	0.924744	3.23427	0.00121954	0.0252379	3.08616	5.94722	3.01014	8.11633	16.7188	5.59816	32.4047	20.8153	31.1047	9.2758	9.55358	6.53118	14.2823	120.002	-1.33739	1.73337	-3.07076	PWWP2A	chr5:159536946:-	-
chr17:684082-684228:mpeak_75231|chr17_663478_685571_GLOD4_NM_-|	21.7055	-3.40771	1.05384	3.23362	0.00122231	0.0252512	1.54308	4.75777	1.00338	16.2327	17.5149	8.39724	74.0679	42.2252	26.0878	18.5516	7.16518	42.9192	5.13006	61.4033	-2.52855	1.05272	-3.58127	GLOD4	-	chr17_780951_-
chrX:54576389-54576702:mpeak_191404|chrX_54556643_54586952_GNL3L_NM_+|	291.274	-2.53068	0.783042	3.23185	0.00122991	0.0253555	20.0601	29.7361	15.0507	86.9606	105.885	121.293	984.486	447.231	272.919	803.516	364.628	243.52	3.80415	22.2531	-2.2763	0.272066	-2.54836	GNL3L	-	chrX_54550115_+;chrX_54550136_+
chr9:140100901-140100952:mpeak_189441|chr9_140100118_140110723_NDOR1_NM_+|	49.4945	-4.38338	1.35684	3.23059	0.00123534	0.0253936	0	0.594722	0	6.95685	6.36905	3.7321	121.903	96.9396	104.351	117.107	82.7977	53.1825	0.552041	6.73997	-4.84209	0.352768	-5.19486	NDOR1	chr9:140100954:+	chr9_137206499_+
chr2:27666692-27666882:mpeak_96677|chr2_27665232_27669167_KRTCAP3_NM_+|	28.8466	-2.75374	0.852798	3.22907	0.00124194	0.0255127	41.6632	33.3044	25.0845	95.077	42.195	55.0485	15.4308	10.1103	16.0541	5.79738	0.796132	5.59816	240.538	1577.48	-0.942761	1.77052	-2.71328	KRTCAP3	-	chr2_27443962_+;chr2_27443984_+
chr14:39558540-39558895:mpeak_54991|chr14_39502532_39572437_SEC23A_NM_-|	47.6513	-2.21768	0.687118	3.2275	0.00124875	0.0255745	13.8877	20.2205	19.0642	30.1464	23.8839	28.9238	172.825	96.3449	59.1993	33.6248	32.6414	41.0532	16.1929	77.2965	-0.641634	1.61341	-2.25504	SEC23A	-	chr14_39089579_-
chrX:56779917-56780717:mpeak_191505|chrX_56755717_56843752_LINC01420_NR_+|	69.6278	-3.4253	1.06178	3.22601	0.0012553	0.025621	3.08616	68.393	41.1385	39.4222	201.421	222.06	112.645	33.3044	43.1453	32.4653	15.1265	23.3257	59.5562	652.736	-2.03928	1.4149	-3.45417	LINC01420	-	chrX_56753785_+;chrX_56754071_+
chr7:80532343-80532469:mpeak_167839|chr7_80374623_80548667_SEMA3C_NM_-|	206.31	-3.18107	0.986813	3.22358	0.00126599	0.0257728	0	1.18944	3.01014	1.15948	7.16518	5.59816	819.376	523.95	468.578	150.732	252.374	242.587	0.347666	2.15626	-1.72913	1.48859	-3.21772	SEMA3C	-	chr7_80903028_-
chr7:44647225-44647299:mpeak_165958|chr7_44646120_44747477_OGDH_NM_+|	192.006	-2.85693	0.886344	3.22328	0.00126732	0.0257779	6.17233	3.56833	3.01014	17.3921	12.7381	6.53118	916.591	414.521	263.889	323.494	204.606	131.557	0.799423	5.55766	-1.52368	1.27377	-2.79745	OGDH	chr7:44647297:+	chr7_44607697_+
chrX:109442870-109442972:mpeak_192686|chrX_109441862_109683461_AMMECR1_NM_-|	48.3733	-2.90843	0.904621	3.21508	0.00130409	0.0261926	1.54308	32.7097	19.0642	9.2758	42.195	37.321	91.0418	116.565	153.517	25.5085	24.6801	27.0578	14.7642	114.946	-0.735832	2.22496	-2.96079	AMMECR1	-	chrX_110199652_-
chr3:62311948-62312008:mpeak_124917|chr3_62304647_62318929_C3orf14_NM_+|	90.753	-3.39101	1.05596	3.2113	0.00132135	0.0264248	0	2.37889	1.00338	1.15948	17.5149	9.33026	322.504	137.975	180.608	133.34	121.808	161.414	0.791374	6.72281	-3.0496	0.621993	-3.6716	C3orf14	chr3:62312007:+	-
chr2:242661107-242661220:mpeak_110061|chr2_242641455_242664403_ING5_NM_+|	32.537	-2.43024	0.756943	3.2106	0.0013246	0.0264531	1.54308	4.75777	5.01689	31.3058	19.9033	17.7275	52.4648	52.3355	47.1588	70.728	44.5834	42.9192	7.44789	43.5672	-2.60668	-0.0583454	-2.54834	ING5	chr2:242661161:+;chr2:242661215:+	chr2_241721745_+;chr2_241721800_+
chr4:108931234-108931399:mpeak_139079|chr4_108910869_108955394_HADH_NM_+|	62.2367	-2.3976	0.747353	3.20812	0.00133607	0.0265953	10.8016	23.7889	13.0439	73.0469	42.9911	40.1201	178.997	103.482	57.1926	93.9175	52.5447	56.9146	14.0236	76.7827	-1.71293	0.739986	-2.45292	HADH	-	chr4_108010209_+
chr4:41215410-41215683:mpeak_135851|chr4_40818276_41216635_APBB2_NM_-|	92.6336	-1.89677	0.591494	3.20675	0.00134243	0.0266348	20.0601	49.9566	33.1115	105.512	132.158	142.753	84.8695	121.918	112.378	80.0038	112.255	116.628	32.3118	123.159	-1.88317	0.0472289	-1.9304	APBB2	chr4:41215511:-	chr4_41213473_-
chr14:69399153-69399314:mpeak_57688|chr14_69341734_69446083_ACTN1_NM_-|	905.904	-2.66305	0.830371	3.20706	0.00134101	0.0266348	4.62925	14.2733	16.0541	49.8574	23.8839	24.2587	4336.06	2114.83	1085.66	1631.38	924.309	645.654	0.463828	3.06122	-1.48722	1.23523	-2.72244	ACTN1	chr14:69399231:-	-
chr2:209105447-209105514:mpeak_107996|chr2_209101893_209119867_IDH1_NM_-|	64.0459	-2.92459	0.912191	3.20612	0.00134538	0.0266366	1.54308	1.78417	14.0473	9.2758	12.7381	9.33026	322.504	155.222	103.348	40.5816	42.195	55.9816	2.99007	22.5891	-0.851222	2.06615	-2.91737	IDH1	-	chr2_208240738_-
chr15:64951629-64951760:mpeak_64247|chr15_64791618_64973890_ZNF609_NM_+|	10.7065	-4.89515	1.52848	3.20262	0.00136181	0.0267946	0	0	1.00338	6.95685	11.942	5.59816	24.6893	20.8153	12.0405	11.5948	3.98066	29.8568	5.23091	53.9198	-4.60967	0.340977	-4.95064	ZNF609	-	chr15_64659579_+
chr14:39569225-39569554:mpeak_54996|chr14_39502532_39572437_SEC23A_NM_-|	67.8622	-2.26275	0.706663	3.20202	0.00136469	0.0268289	35.4909	38.6569	72.2432	106.672	50.9524	74.6421	172.825	96.3449	59.1993	33.6248	32.6414	41.0532	44.5812	216.425	-0.665952	1.61341	-2.27936	SEC23A	-	chr14_39100147_-
chr7:55434405-55434607:mpeak_166268|chr7_55433140_55498918_LANCL2_NM_+|	36.7694	-2.67482	0.835467	3.20158	0.00136676	0.0268305	29.3186	21.41	5.01689	82.3227	35.0298	45.7183	72.5248	45.7936	34.1149	26.6679	30.253	13.0624	36.5704	233.014	-1.54857	1.1231	-2.67167	LANCL2	chr7:55434480:+	chr7_55366788_+
chr5:60672694-60672940:mpeak_144911|chr5_60628099_60839281_ZSWIM6_NM_+|	75.0223	-2.0888	0.652836	3.19957	0.00137633	0.0269107	10.8016	18.4364	22.0743	12.7542	15.9226	27.9908	277.755	187.337	166.561	49.8574	55.7292	55.0485	8.12349	35.2772	-0.143221	1.97534	-2.11857	ZSWIM6	chr5:60672790:+;chr5:60672864:+	-
chr9:14147547-14147707:mpeak_182056|chr9_14088325_14398982_NFIB_NM_-|	100.956	-2.39253	0.748063	3.1983	0.00138241	0.0269765	4.62925	26.7625	21.0709	19.7111	46.9718	51.3164	316.332	192.095	229.774	71.8875	132.954	97.9678	7.10683	38.9682	-1.16941	1.2856	-2.45502	NFIB	-	chr9_14147620_-
chr10:95070494-95070718:mpeak_25552|chr10_95066758_95242074_MYOF_NM_-|	18.3756	-3.2205	1.00694	3.19831	0.00138236	0.0269765	1.54308	5.94722	0	15.0732	11.942	5.59816	72.5248	32.115	25.0845	16.2327	16.7188	17.7275	8.66102	64.3528	-2.12237	1.35599	-3.47836	MYOF	-	chr10_93310859_-
chr16:85700018-85700102:mpeak_74555|chr16_85645028_85706010_GSE1_NM_+|	439.679	-2.29986	0.720635	3.19144	0.00141566	0.0273366	4.62925	10.1103	7.02365	41.7411	40.6027	18.6605	1280.76	732.102	711.395	695.685	586.749	1146.69	0.798866	4.15806	-2.21446	0.165426	-2.37988	GSE1	chr16:85700106:+	chr16_85666496_+
chr4:39755129-39755406:mpeak_135530|chr4_39699663_39779979_UBE2K_NM_+|	123.899	-2.00744	0.629948	3.18667	0.00143919	0.0275645	32.4047	20.8153	28.0946	68.409	28.6607	50.3834	387.314	216.479	261.882	103.193	136.138	153.016	9.39321	37.5822	-0.858671	1.14169	-2.00036	UBE2K	-	chr4_39753593_+;chr4_39753735_+
chr2:74155844-74156138:mpeak_100260|chr2_74153952_74185836_DGUOK_NM_+|	100.886	-2.48252	0.778936	3.18707	0.00143723	0.0275645	4.62925	7.13666	5.01689	20.8706	13.5342	17.7275	407.374	198.637	139.47	182.038	116.235	97.9678	2.25127	13.1567	-1.63519	0.911794	-2.54699	DGUOK	-	chr2_73928977_+
chr21:43957278-43957360:mpeak_117006|chr21_43919741_44000454_SLC37A1_NM_+|	56.1991	-2.20246	0.692065	3.18244	0.00146038	0.0276836	1.54308	7.73138	8.02703	11.5948	14.3304	11.1963	148.136	132.028	153.517	71.8875	50.9524	63.4458	3.98945	19.9272	-1.10136	1.21912	-2.32047	SLC37A1	-	chr21_42537249_+
chr12:69657233-69657345:mpeak_43440|chr12_69633316_69663291_CPSF6_NM_+|	59.4596	-3.3501	1.0539	3.17877	0.00147903	0.0279224	1.54308	1.18944	1.00338	4.6379	6.36905	13.0624	217.575	126.676	70.2365	98.5554	75.6325	97.0347	0.901332	8.87438	-2.68767	0.611849	-3.29951	CPSF6	chr12:69657305:+;chr12:69657347:+	chr12_69263524_+
chr20:52826167-52826876:mpeak_114441|chr20_52824501_52835557_PFDN4_NM_+|	222.564	-2.08865	0.657354	3.17736	0.0014862	0.028004	175.911	136.786	106.358	488.139	218.14	194.069	410.46	221.831	265.895	135.659	112.255	205.266	46.6557	198.674	-1.10334	0.986934	-2.09028	PFDN4	-	chr20_54210067_+
chr3:122107222-122107521:mpeak_127600|chr3_122103022_122128585_FAM162A_NM_+|	52.1215	-2.60675	0.820761	3.17601	0.00149317	0.0280557	3.08616	13.0839	12.0405	16.2327	25.4762	57.8476	146.593	90.9924	83.2804	74.2064	32.6414	69.977	8.79202	56.3023	-1.81928	0.859649	-2.67893	FAM162A	-	chr3_122388580_+
chr16:85700172-85700321:mpeak_74556|chr16_85645028_85706010_GSE1_NM_+|	480.246	-1.98682	0.627347	3.16702	0.00154009	0.0283878	46.2925	56.4986	31.1047	171.602	195.848	108.231	1280.76	732.102	711.395	695.685	586.749	1146.69	4.91495	19.5824	-1.82889	0.165426	-1.99431	GSE1	chr16:85700282:+	chr16_85666675_+
chr11:47647324-47647407:mpeak_31414|chr11_47640471_47664206_MTCH2_NM_-|	325.784	-4.09501	1.29434	3.16377	0.00155738	0.0285803	1.54308	0.594722	0	4.6379	7.96132	5.59816	1428.89	560.823	455.534	761.775	292.976	389.072	0.13114	1.26036	-3.08953	0.760088	-3.84962	MTCH2	-	chr11_47625733_-
chr9:111671842-111671983:mpeak_186339|chr9_111631462_111696608_IKBKAP_NM_-|	65.7005	-2.1876	0.691827	3.16206	0.00156655	0.0286471	26.2324	20.2205	63.2128	91.5985	108.274	98.9008	92.5849	77.9086	67.2264	37.1032	34.2337	70.91	46.1324	210.039	-1.44594	0.740865	-2.1868	IKBKAP	-	chr9_108909648_-
chr11:16959877-16960119:mpeak_29876|chr11_16810843_17035963_PLEKHA7_NM_-|	17.0168	-2.71651	0.860741	3.15601	0.00159943	0.0289542	9.25849	18.4364	15.0507	27.8274	35.0298	51.3164	7.71541	11.2997	15.0507	2.31895	7.16518	3.7321	125.479	863.889	-1.41738	1.36601	-2.7834	PLEKHA7	-	chr11_16938497_-
chr8:52764677-52764730:mpeak_174881|chr8_52733278_52811746_PCMTD1_NM_-|	39.1921	-4.58008	1.45158	3.15524	0.00160369	0.0290091	0	0.594722	1.00338	1.15948	12.7381	0	89.4987	107.05	143.483	13.9137	37.4182	63.4458	0.704978	18.1624	-3.1204	1.56683	-4.68723	PCMTD1	chr8:52764678:-	chr8_51852119_-
chr1:201842161-201842281:mpeak_15937|chr1_201798287_201845071_IPO9_NM_+|	191.718	-3.55652	1.12759	3.15409	0.00161001	0.0290572	1.54308	1.18944	0	16.2327	2.38839	5.59816	523.105	456.152	335.128	346.683	382.143	230.457	0.311841	2.52472	-3.14784	0.454358	-3.6022	IPO9	-	chr1_201873144_+
chr12:124119172-124119333:mpeak_48169|chr12_124118285_124144712_GTF2H3_NM_+|	45.1607	-2.88384	0.915821	3.14891	0.00163882	0.0293761	0	8.3261	5.01689	39.4222	15.1265	8.39724	157.394	80.8822	61.2061	60.2927	51.7485	54.1155	6.68302	37.8834	-2.23803	0.849927	-3.08796	GTF2H3	chr12:124119269:+	-
chr12:12491609-12491755:mpeak_38375|chr12_12483892_12503169_MANSC1_NM_-|	52.7381	-2.42024	0.769273	3.14613	0.00165444	0.0295008	30.8616	51.1461	30.1014	208.706	87.5745	173.543	10.8016	7.13666	11.0372	8.11633	6.36905	7.46421	386.911	2140.46	-2.06721	0.400635	-2.46785	MANSC1	-	chr12_12338747_-
chr17:17732610-17732875:mpeak_77315|chr17_17716165_17740325_SREBF1_NM_-|	198.881	-1.98114	0.629901	3.14516	0.00165996	0.0295771	47.8355	60.0669	54.1824	157.689	73.2441	108.231	572.483	383.001	279.943	256.244	136.138	257.515	13.1197	52.1873	-1.06523	0.926725	-1.99196	SREBF1	-	chr17_17829481_-
chr5:115575780-115576127:mpeak_148503|chr5_115420672_115628147_COMMD10_NM_+|	13.5489	-2.79389	0.889088	3.14242	0.00167556	0.0296659	4.62925	9.51555	6.02027	8.11633	28.6607	11.1963	26.2324	22.5994	22.0743	8.11633	7.96132	7.46421	28.4391	203.779	-1.25038	1.59068	-2.84106	COMMD10	-	chr5_116240213_+;chr5_116240303_+
chr19:58900484-58900610:mpeak_94822|chr19_58898635_58906048_RPS5_NM_+|	549.658	-3.57837	1.14029	3.13811	0.00170042	0.0299677	0	1.78417	1.00338	10.4353	9.55358	0.933026	2348.57	1086.56	927.122	1179.19	495.194	535.557	0.0958523	0.946718	-2.90795	0.981067	-3.88901	RPS5	chr19:58900559:+;chr19:58900611:+	chr19_58389243_+
chr2:217020351-217020415:mpeak_108399|chr2_216974019_217069910_XRCC5_NM_+|	471.947	-2.23371	0.712126	3.13668	0.00170871	0.0300515	29.3186	14.868	18.0608	37.1032	48.564	42.9192	2038.41	1163.28	568.916	721.194	384.532	596.204	1.65086	7.55534	-1.04665	1.14762	-2.19428	XRCC5	-	chr2_216155685_+
chr2:44217362-44217914:mpeak_97916|chr2_44115795_44223144_LRPPRC_NM_-|	287.014	-1.67644	0.534676	3.13542	0.00171606	0.0301251	163.567	149.275	158.534	316.537	250.781	167.012	618.776	545.36	341.149	238.852	245.209	249.118	31.3147	100.157	-0.639551	1.0378	-1.67735	LRPPRC	-	chr2_43990336_-
chr22:36781114-36781398:mpeak_119372|chr22_36678831_36784112_MYH9_NM_-|	366.818	-2.09833	0.669822	3.13266	0.00173229	0.030307	46.2925	44.0094	55.1858	112.469	82.0015	97.9678	1442.78	863.536	392.321	510.169	470.514	284.573	5.39115	23.113	-1.00724	1.0928	-2.10004	MYH9	chr22:36781348:-	chr22_36385198_-;chr22_36385303_-
chr18:47795209-47795502:mpeak_87519|chr18_47794033_47808144_MBD1_NM_-|	22.2457	-4.47699	1.43132	3.12788	0.00176071	0.0305685	67.8956	52.3355	52.1757	17.3921	8.75745	36.388	9.25849	10.705	12.0405	0	0	0	538.703	#DIV/0!	1.46302	Inf	-Inf	MBD1	chr18:47795216:-;chr18:47795262:-;chr18:47795340:-;chr18:47795401:-;chr18:47795448:-	chr18_50268847_-;chr18_50268860_-;chr18_50268974_-;chr18_50269021_-
chr7:44680215-44680266:mpeak_165962|chr7_44646120_44747477_OGDH_NM_+|	190.134	-3.1251	0.99905	3.12808	0.00175954	0.0305685	0	2.37889	3.01014	3.47843	8.75745	9.33026	916.591	414.521	263.889	323.494	204.606	131.557	0.506805	3.2693	-2.00067	1.27377	-3.27444	OGDH	-	chr7_44640714_+
chr11:35219658-35219943:mpeak_30783|chr11_35160416_35250675_CD44_NM_+|	60.6807	-2.97523	0.95163	3.12646	0.00176927	0.0306407	6.17233	1.18944	1.00338	4.6379	15.1265	13.9954	226.833	117.16	76.2568	107.831	85.1861	72.776	1.99052	12.7015	-2.01284	0.660943	-2.67379	CD44	chr11:35219990:+	chr11_35198439_+
chr2:160984313-160984376:mpeak_105105|chr2_160958345_161056824_ITGB6_NM_-|	72.0096	-3.79737	1.21516	3.125	0.00177807	0.0307436	0	2.37889	2.00676	1.15948	58.1176	42.9192	78.6972	140.354	87.2939	57.9738	203.81	189.404	2.1474	22.6505	-4.54241	-0.558569	-3.98384	ITGB6	chr2:160984267:-	-
chr18:33604499-33604630:mpeak_86980|chr18_33573263_33647557_RPRD1A_NM_-|	16.4107	-3.15398	1.00925	3.12507	0.00177761	0.0307436	0	2.37889	1.00338	6.95685	11.1458	5.59816	30.8616	30.3308	43.1453	22.03	23.8839	19.5936	4.86248	36.1803	-2.80888	0.671528	-3.48041	RPRD1A	chr18:33604512:-;chr18:33604570:-	chr18_36024535_-;chr18_36024609_-;chr18_36024677_-
chr2:69988856-69989008:mpeak_99760|chr2_69969126_70052587_ANXA4_NM_+|	83.4546	-2.67276	0.855598	3.12385	0.00178502	0.0307707	55.5509	189.122	211.713	42.9006	111.458	94.2356	135.791	66.0141	71.2399	8.11633	3.18453	12.1293	167.146	1061	0.876457	3.5427	-2.66624	ANXA4	-	chr2_69761908_+
chr15:43776030-43776175:mpeak_62231|chr15_43699768_43802707_TP53BP1_NM_-|	133.383	-3.29955	1.0563	3.12368	0.00178604	0.0307742	0	1.78417	0	12.7542	8.75745	5.59816	279.298	280.114	211.713	266.679	248.393	285.506	0.694116	3.38628	-3.92549	-0.0540786	-3.87142	TP53BP1	-	chr15_43483917_-
chr12:29501792-29501872:mpeak_39402|chr12_29494151_29534143_ERGIC2_NM_-|	86.3113	-1.95997	0.627503	3.12344	0.0017875	0.0307882	13.8877	30.9255	21.0709	26.6679	41.3988	29.8568	279.298	185.553	171.578	61.4522	94.7397	79.3072	10.3522	41.5813	-0.571724	1.43428	-2.006	ERGIC2	-	chr12_29348866_-
chr11:36170806-36171021:mpeak_30852|chr11_35965530_36250709_LDLRAD3_NM_+|	41.3665	-3.27079	1.04753	3.12239	0.00179387	0.0308494	0	5.3525	1.00338	12.7542	9.55358	3.7321	183.627	57.0933	105.355	60.2927	17.5149	40.1201	2.75484	22.0812	-2.03456	1.55318	-3.58774	LDLRAD3	-	chr11_36149395_+
chr12:80269922-80270066:mpeak_44329|chr12_80169795_80329235_PPP1R12A_NM_-|	55.3217	-2.88264	0.923307	3.12208	0.00179577	0.0308525	0	2.37889	5.01689	2.31895	8.75745	14.9284	115.731	139.76	179.605	37.1032	78.0209	80.2403	2.54971	13.3109	-1.814	1.15516	-2.96917	PPP1R12A	-	chr12_79876143_-
chr16:4513361-4513595:mpeak_68391|chr16_4511960_4524896_NMRAL1_NM_-|	72.607	-2.26143	0.724577	3.12103	0.00180217	0.0308844	6.17233	6.54194	5.01689	42.9006	17.5149	23.3257	171.282	121.323	99.3345	156.529	128.973	92.3696	4.52395	22.1612	-2.23965	0.0527342	-2.29238	NMRAL1	chr16:4513536:-	chr16_4463360_-
chr3:33590116-33590204:mpeak_122826|chr3_33540209_33759705_CLASP2_NM_-|	19.224	-2.57235	0.824257	3.12081	0.00180354	0.0308967	1.54308	6.54194	2.00676	12.7542	15.1265	12.1293	44.7494	29.7361	40.1351	20.8706	19.9033	25.1917	8.80451	60.653	-1.98718	0.797082	-2.78426	CLASP2	-	chr3_33548625_-
chr19:36706355-36706460:mpeak_91667|chr19_36705503_36726560_ZNF146_NM_+|	70.0265	-2.10353	0.675105	3.11586	0.00183408	0.0311182	24.6893	10.1103	10.0338	97.3959	53.3408	44.7853	114.188	80.8822	96.3243	82.3227	105.885	120.36	15.3858	63.3642	-2.12469	-0.0826175	-2.04207	ZNF146	chr19:36706503:+	-
chr1:9854745-9854855:mpeak_745|chr1_9790763_9884584_CLSTN1_NM_-|	525.637	-2.94152	0.944933	3.11294	0.00185235	0.0312965	3.08616	2.37889	2.00676	9.2758	10.3497	12.1293	2200.43	1200.15	594	1186.14	695.819	391.871	0.187048	1.39653	-2.08745	0.812919	-2.90037	CLSTN1	-	chr1_9794696_-
chr9:128052387-128052589:mpeak_187897|chr9_128024072_128124884_GAPVD1_NM_+|	130.021	-1.63359	0.525615	3.10796	0.00188386	0.0315841	44.7494	64.8247	81.2737	118.266	97.9242	92.3696	268.496	248.594	182.615	125.223	120.216	115.695	27.2755	85.4419	-0.69313	0.95421	-1.64734	GAPVD1	-	chr9_125290186_+;chr9_125290290_+
chr4:169845143-169845198:mpeak_141733|chr4_169418216_169847363_PALLD_NM_+|	204.283	-3.36769	1.08351	3.10813	0.00188273	0.0315841	0	1.78417	1.00338	6.95685	9.55358	3.7321	874.927	423.442	247.834	324.653	333.579	223.926	0.270425	2.29466	-2.86032	0.809621	-3.66994	PALLD	-	chr4_168924043_+
chr16:22240575-22240726:mpeak_69979|chr16_22217591_22295207_EEF2K_NM_+|	98.3935	-2.26068	0.727567	3.10718	0.00188879	0.0316254	1.54308	10.1103	11.0372	17.3921	17.5149	10.2633	273.125	189.122	341.149	133.34	77.2248	98.9008	2.82433	14.5962	-0.993286	1.37633	-2.36962	EEF2K	chr16:22240662:+	chr16_22229325_+
chr16:74955312-74955464:mpeak_73647|chr16_74908342_75019017_WDR59_NM_-|	61.7271	-2.12442	0.684479	3.1037	0.00191117	0.0318012	10.8016	35.6833	32.1081	40.5816	46.9718	80.2403	114.188	100.508	120.405	41.7411	43.7872	73.7091	23.4535	105.373	-1.09422	1.07342	-2.16763	WDR59	-	chr16_74921414_-
chrX:80539852-80540173:mpeak_192229|chrX_80457302_80552693_SH3BGRL_NM_+|	19.2818	-2.79956	0.902085	3.10343	0.00191291	0.0318189	6.17233	12.4892	15.0507	6.95685	47.7679	32.6559	33.9478	22.0047	25.0845	8.11633	12.7381	8.39724	41.601	298.72	-1.37404	1.47006	-2.84411	SH3BGRL	-	chrX_81284612_+
chr8:124814267-124814923:mpeak_179659|chr8_124780881_124824758_FAM91A1_NM_+|	170.12	-1.96744	0.634593	3.10031	0.00193316	0.0320549	44.7494	97.5344	124.419	57.9738	121.012	119.427	348.736	334.828	465.568	99.7149	98.7203	128.758	23.209	91.2041	-0.162079	1.81233	-1.97441	FAM91A1	-	chr8_123802272_+
chr5:128866218-128866315:mpeak_149150|chr5_128796102_129072759_ADAMTS19_NM_+|	41.5143	-2.61397	0.843418	3.09926	0.00194003	0.032124	9.25849	25.573	34.1149	17.3921	96.3319	80.2403	67.8956	46.983	47.1588	23.1895	18.311	31.7229	42.5497	264.894	-1.49224	1.14595	-2.63819	ADAMTS19	-	chr5_129530616_+
chr8:95716939-95717091:mpeak_177066|chr8_95653363_95718152_ESRP1_NM_+|	389.53	-2.00496	0.647173	3.09803	0.0019481	0.0322016	135.791	349.696	346.166	398.859	784.986	402.134	617.233	501.945	412.389	183.197	234.063	307.899	54.3008	218.708	-0.93132	1.07864	-2.00996	ESRP1	chr8:95717021:+	-
chr9:132267260-132267408:mpeak_188627|chr9_132250938_132275697_LINC00963_NR_+|	5.36284	-4.32062	1.39478	3.09771	0.00195023	0.0322147	4.62925	0.594722	2.00676	11.5948	13.5342	1.86605	6.17233	7.73138	11.0372	0	2.38839	2.79908	28.9915	346.926	-1.90048	2.26541	-4.16589	LINC00963	chr9:132267334:+;chr9:132267360:+;chr9:132267404:+	chr9_129504986_+;chr9_129505054_+;chr9_129505124_+
chr9:110046366-110046530:mpeak_186266|chr9_110045516_110091823_RAD23B_NM_+|	381.44	-2.07254	0.669376	3.09622	0.00196003	0.0323132	50.9217	46.983	26.0878	112.469	152.857	75.5751	1365.63	586.99	531.791	644.668	521.466	461.848	4.99083	20.9401	-1.4591	0.609817	-2.06892	RAD23B	-	chr9_107284162_+
chr4:143053554-143054488:mpeak_140402|chr4_142950067_143767604_INPP4B_NM_-|	123.209	-2.56512	0.828958	3.0944	0.00197214	0.0324377	44.7494	102.887	107.361	57.9738	422.746	348.952	97.2142	71.3666	86.2905	33.6248	49.3602	55.9816	100.05	597.03	-1.70206	0.875032	-2.57709	INPP4B	-	chr4_142132757_-
chr3:170587850-170587904:mpeak_131538|chr3_170584313_170588045_RPL22L1_NM_-|	70.3349	-4.09763	1.32534	3.09176	0.00198975	0.0325506	0	1.78417	0	11.5948	2.38839	2.79908	339.478	91.5872	168.568	76.5254	27.0685	122.226	0.892629	7.43167	-3.23361	1.4089	-4.64252	RPL22L1	-	chr3_170870023_-
chr17:66511661-66511910:mpeak_83839|chr17_66409763_66547224_PRKAR1A_NM_+|	32.608	-4.29438	1.39139	3.08639	0.00202605	0.0328906	69.4387	47.5777	53.1791	73.0469	71.6518	58.7807	3.08616	3.56833	10.0338	0	0	0.933026	1019.85	7269.51	-0.25769	4.16077	-4.41846	PRKAR1A	chr17:66511744:+	chr17_68515643_+;chr17_68515698_+;chr17_68515726_+;chr17_68515838_+
chr12:54672736-54672858:mpeak_41751|chr12_54635689_54673915_CBX5_NM_-|	472.436	-2.34199	0.759174	3.08492	0.00203606	0.0329134	6.17233	3.56833	4.01351	28.9869	8.75745	13.9954	1185.09	971.775	1016.42	989.032	906.794	534.624	0.433436	2.12881	-1.9114	0.384753	-2.29616	CBX5	chr12:54672788:-	chr12_54278986_-
chr11:63794201-63794472:mpeak_32325|chr11_63766159_63933585_MACROD1_NM_-|	24.9751	-3.2606	1.05723	3.08409	0.00204177	0.0329483	0	2.37889	3.01014	16.2327	17.5149	9.33026	80.2403	39.2516	25.0845	55.6548	39.8066	11.1963	5.59119	40.3888	-2.99885	0.438843	-3.43769	MACROD1	-	chr11_64026991_-
chr6:170668028-170668086:mpeak_163293|chr6_170599790_170713850_FAM120B_NM_+|	76.172	-3.29663	1.06932	3.08292	0.00204978	0.0330326	0	2.37889	0	11.5948	3.18453	1.86605	217.575	201.611	188.635	110.15	104.293	72.776	1.17414	5.79534	-2.80676	1.08149	-3.88825	FAM120B	chr6:170668085:+	chr6_170358974_+;chr6_170358996_+
chr2:54039699-54039902:mpeak_98560|chr2_54014067_54045034_ERLEC1_NM_+|	25.1717	-2.62522	0.851818	3.0819	0.00205684	0.033124	13.8877	27.3572	11.0372	40.5816	97.128	68.1109	7.71541	8.3261	11.0372	4.6379	4.77679	7.46421	193.075	1219.4	-1.977	0.681936	-2.65893	ERLEC1	-	chr2_53812642_+
chr1:117207710-117207797:mpeak_9199|chr1_117120184_117210377_IGSF3_NM_-|	593.154	-3.25513	1.05638	3.0814	0.00206031	0.0331462	0	2.37889	1.00338	8.11633	8.75745	6.53118	2504.42	1306.01	682.297	1383.25	644.07	571.012	0.112925	0.900767	-2.79075	0.790004	-3.58076	IGSF3	chr1:117207700:-	-
chr4:109543871-109544192:mpeak_139089|chr4_109541721_109551176_RPL34_NM_+|	72.1934	-2.70407	0.878428	3.0783	0.00208182	0.0333344	94.128	49.9566	49.1655	313.058	94.7397	106.365	69.4387	21.41	22.0743	25.5085	11.1458	9.33026	171.134	1118.12	-1.41176	1.29612	-2.70787	RPL34	-	chr4_108622886_+
chr6:43321913-43321971:mpeak_156707|chr6_43308240_43337181_ZNF318_NM_-|	163.333	-2.82984	0.919539	3.07745	0.00208779	0.0333738	1.54308	1.78417	1.00338	10.4353	3.98066	9.33026	388.857	411.547	317.068	337.407	264.316	212.73	0.387538	2.9156	-2.45505	0.456335	-2.91138	ZNF318	chr6:43321892:-;chr6:43321917:-	chr6_43354180_-
chr11:117093316-117093435:mpeak_36204|chr11_117077072_117103241_PCSK7_NM_-|	22.2153	-3.08781	1.00561	3.07057	0.00213649	0.0338	32.4047	22.0047	21.0709	26.6679	10.3497	28.9238	60.1802	20.2205	33.1115	2.31895	0	9.33026	66.4954	377.373	0.194916	3.28454	-3.08963	PCSK7	chr11:117093313:-	chr11_117222612_-
chr10:134405483-134405540:mpeak_28504|chr10_134351352_134595540_INPP5A_NM_+|	111.744	-1.71342	0.558261	3.06922	0.00214621	0.0338971	15.4308	11.2997	21.0709	46.379	44.5834	38.2541	217.575	204.584	210.709	199.43	149.673	181.94	7.55315	24.3326	-1.43466	0.253078	-1.68774	INPP5A	-	chr10_132592065_+
chr16:69399997-69400149:mpeak_72768|chr16_69390959_69419891_TERF2_NM_-|	72.6563	-2.37305	0.773858	3.06652	0.00216569	0.033957	60.1802	32.7097	20.0676	222.619	152.857	63.4458	95.6711	48.7672	38.1284	47.5385	46.9718	42.9192	61.8719	319.38	-1.95819	0.409732	-2.36792	TERF2	chr16:69399998:-;chr16:69400089:-	chr16_69366095_-;chr16_69366143_-;chr16_69366195_-
chr14:31454954-31455218:mpeak_54327|chr14_31364786_31495607_STRN3_NM_-|	252.264	-1.88965	0.616854	3.06337	0.00218862	0.0341477	40.1201	70.7719	91.3074	98.5554	204.606	130.624	401.201	522.166	594	219.141	273.073	381.608	13.3257	49.6423	-1.1012	0.796159	-1.89736	STRN3	-	chr14_30985852_-
chr5:180236528-180236647:mpeak_152965|chr5_180220097_180237137_MGAT1_NM_-|	135.644	-3.03376	0.991516	3.05972	0.00221546	0.0343212	9.25849	2.37889	0	23.1895	8.75745	4.66513	529.277	344.344	225.76	256.244	103.497	120.36	1.58781	7.6259	-1.65355	1.19528	-2.84883	MGAT1	-	chr5_180809575_-
chr3:12636104-12636315:mpeak_121442|chr3_12626156_12705700_RAF1_NM_-|	81.153	-2.49158	0.815972	3.05351	0.00226182	0.0347564	81.7833	90.3977	62.2095	191.313	112.255	115.695	129.619	54.7144	59.1993	13.9137	9.55358	53.1825	96.246	546.986	-0.838942	1.66776	-2.5067	RAF1	-	chr3_12594720_-
chr12:6482482-6482637:mpeak_37751|chr12_6457419_6486523_SCNN1A_NM_-|	98.6799	-4.34938	1.42546	3.05121	0.00227918	0.0349191	0	0	0	6.95685	2.38839	7.46421	211.402	179.606	76.2568	244.649	297.753	157.681	#DIV/0!	2.40106	-Inf	-0.583287	-Inf	SCNN1A	-	chr12_6373391_-
chr4:101974497-101974808:mpeak_138496|chr4_101947218_102268628_PPP3CA_NM_-|	2304.34	-2.74047	0.898762	3.04917	0.00229478	0.0349889	7.71541	14.2733	17.0574	4.6379	21.4956	76.5081	9368.05	4853.52	5594.84	2616.94	2645.55	2431.47	0.19704	1.33406	-1.39436	1.3649	-2.75926	PPP3CA	-	chr4_101053437_-
chr16:69222563-69222763:mpeak_72686|chr16_69221049_69334734_SNTB2_NM_+|	125.461	-1.88883	0.619772	3.04762	0.00230665	0.0351035	26.2324	25.573	23.0777	28.9869	31.0491	11.1963	310.159	305.687	465.568	92.758	94.7397	90.5035	6.92456	25.623	0.0721087	1.95976	-1.88765	SNTB2	-	chr16_69188791_+
chr1:21474498-21474629:mpeak_1719|chr1_21133993_21503381_EIF4G3_NM_-|	67.8055	-2.05872	0.675669	3.04693	0.00231191	0.0351599	6.17233	5.94722	8.02703	26.6679	14.3304	14.9284	175.911	134.407	134.453	100.874	115.439	76.5081	4.52965	19.0992	-1.473	0.603041	-2.07604	EIF4G3	-	chr1_21148070_-
chr12:100558825-100558958:mpeak_45467|chr12_100550836_100567121_GOLGA2P5_NR_-|	21.4782	-2.46264	0.808374	3.04641	0.0023159	0.0351897	16.9739	19.6258	14.0473	17.3921	31.0491	58.7807	20.0601	20.2205	32.1081	5.79738	9.55358	12.1293	69.9653	390.177	-1.08205	1.39737	-2.47942	GOLGA2P5	chr12:100558828:-;chr12:100558887:-	chr12_100165052_-;chr12_100165110_-
chr1:202308154-202308287:mpeak_16045|chr1_202301088_202311094_UBE2T_NM_-|	29.0642	-2.99869	0.98474	3.04516	0.00232558	0.0352663	6.17233	1.78417	1.00338	17.3921	18.311	14.9284	103.386	27.9519	29.098	51.0169	25.4762	52.2495	5.58469	39.3278	-2.49849	0.317512	-2.816	UBE2T	-	chr1_202339109_-
chr6:33677074-33677227:mpeak_155648|chr6_33665527_33679528_UQCC2_NM_-|	42.1059	-2.59491	0.852182	3.04501	0.0023267	0.0352721	9.25849	4.75777	3.01014	54.4953	32.6414	10.2633	91.0418	54.1197	51.1723	78.8443	65.2828	50.3834	8.67217	50.0744	-2.51615	0.0134605	-2.52961	UQCC2	chr6:33677162:-	chr6_33709366_-
chr22:46779796-46779921:mpeak_120429|chr22_46759084_46933067_CELSR1_NM_-|	12.8913	-2.98437	0.983145	3.03554	0.00240109	0.0358738	4.62925	5.94722	5.01689	22.03	26.2723	16.7945	24.6893	15.4628	9.03041	2.31895	4.77679	17.7275	31.7051	262.242	-2.06166	0.986453	-3.04811	CELSR1	-	chr22_46383883_-;chr22_46383957_-
chr6:150184033-150184340:mpeak_161979|chr6_150141839_150185480_LRP11_NM_-|	80.8585	-2.17718	0.717301	3.03523	0.0024035	0.0358861	27.7755	16.6522	24.0811	61.4522	42.195	27.9908	300.901	148.086	90.3041	81.1633	84.3899	65.3118	12.7035	57.0194	-0.942215	1.22401	-2.16623	LRP11	chr6:150184160:-	chr6_149863026_-;chr6_149863055_-;chr6_149863099_-
chr19:46870495-46870563:mpeak_92998|chr19_46850250_46893540_PPP5C_NM_+|	13.2761	-4.32421	1.42485	3.03485	0.00240657	0.0359106	0	0.594722	0	3.47843	7.16518	9.33026	26.2324	28.5466	15.0507	32.4653	15.9226	20.5266	2.55502	28.9835	-5.06976	0.0190332	-5.08879	PPP5C	-	chr19_46367323_+
chr1:155691429-155691517:mpeak_12427|chr1_155658881_155707947_DAP3_NM_+|	114.589	-2.45838	0.810135	3.03453	0.00240909	0.0359165	4.62925	15.4628	6.02027	41.7411	20.6994	25.1917	396.572	214.695	193.652	135.659	77.2248	243.52	3.24409	19.2006	-1.74673	0.818534	-2.56527	DAP3	-	chr1_155721734_+
chr16:16118025-16118188:mpeak_69394|chr16_16043433_16235029_ABCC1_NM_+|	45.104	-1.97311	0.650451	3.03345	0.00241776	0.0359984	20.0601	24.3836	14.0473	47.5385	32.6414	36.388	86.4126	64.8247	93.3142	27.8274	35.0298	58.7807	23.9176	95.8319	-0.994885	1.00755	-2.00243	ABCC1	-	chr16_16024279_+
chr20:49349292-49349537:mpeak_113995|chr20_49348080_49366195_PARD6B_NM_+|	1066.7	-1.47779	0.48726	3.03286	0.0024225	0.0360126	168.196	312.229	267.902	570.462	574.011	576.61	2198.89	1908.46	1562.26	1615.15	1601.02	1445.26	13.1989	36.9218	-1.20158	0.282479	-1.48405	PARD6B	-	chr20_50732873_+
chr20:35860064-35860194:mpeak_112306|chr20_35807455_35869705_RPN2_NM_+|	534.968	-2.29355	0.756502	3.03179	0.0024311	0.0360728	97.2142	86.2347	73.2466	263.201	109.07	120.36	2194.26	1251.29	630.122	847.576	452.203	294.836	6.29823	30.8934	-0.940451	1.35383	-2.29428	RPN2	chr20:35860125:+	-
chr9:20660421-20660624:mpeak_182265|chr9_20658307_20995554_FOCAD_NM_+|	42.7312	-3.98274	1.31411	3.03077	0.00243935	0.0361215	0	1.18944	0	1.15948	9.55358	5.59816	154.308	100.508	52.1757	80.0038	48.564	59.7137	1.16235	8.6632	-3.77751	0.705309	-4.48281	FOCAD	-	chr9_20660575_+
chr7:156959376-156959505:mpeak_172599|chr7_156931654_157060278_UBE3C_NM_+|	72.8026	-1.9963	0.659011	3.02923	0.00245175	0.036221	13.8877	11.2997	13.0439	28.9869	42.9911	25.1917	217.575	132.623	98.3311	118.266	82.7977	88.6375	8.52373	33.5413	-1.34575	0.630632	-1.97638	UBE3C	-	chr7_157166811_+
chr17:15586022-15586173:mpeak_76965|chr17_15532512_15586193_TRIM16_NM_-|	86.4494	-4.50466	1.48764	3.02806	0.00246128	0.0362717	0	0	0	13.9137	6.36905	3.7321	206.773	93.966	46.1554	355.959	185.499	125.026	#DIV/0!	3.60322	-Inf	-0.942072	-Inf	TRIM16	-	chr17_15682854_-
chr7:72390628-72390862:mpeak_166950|chr7_72349905_72418866_POM121_NM_+|	15.8091	-2.61254	0.863658	3.02497	0.00248662	0.0364767	26.2324	11.8944	15.0507	27.8274	22.2917	24.2587	21.6031	12.4892	16.0541	6.95685	3.18453	1.86605	106.045	619.431	-0.484055	2.06222	-2.54627	POM121	chr7:72390705:+;chr7:72390789:+;chr7:72390863:+	chr7_72920115_+;chr7_72920166_+;chr7_72920251_+;chr7_72920325_+
chr11:71171901-71171999:mpeak_33600|chr11_71164216_71212347_NADSYN1_NM_+|	179.295	-1.71535	0.567083	3.02486	0.00248747	0.0364767	33.9478	28.5466	25.0845	49.8574	30.253	32.6559	509.217	493.619	398.341	227.257	190.275	132.49	6.25038	20.5021	-0.364681	1.34908	-1.71376	NADSYN1	chr11:71171993:+	chr11_71460942_+
chr16:10650050-10650253:mpeak_68791|chr16_10626949_10674573_EMP2_NM_-|	490.918	-2.15279	0.711617	3.02522	0.00248456	0.0364767	6.17233	12.4892	8.02703	31.3058	26.2723	33.5889	1654.18	1071.69	606.041	1136.29	723.684	581.275	0.800997	3.73445	-1.77229	0.448734	-2.22103	EMP2	-	chr16_10556227_-
chr20:21317456-21317800:mpeak_111405|chr20_21283941_21369910_XRN2_NM_+|	14.3732	-3.40824	1.12748	3.02288	0.00250382	0.0365699	1.54308	15.4628	14.0473	6.95685	32.6414	25.1917	29.3186	23.1941	12.0405	1.15948	1.59226	9.33026	48.1047	536.252	-1.06103	2.41763	-3.47866	XRN2	-	chr20_21337043_+
chr9:125857930-125858062:mpeak_187554|chr9_125703287_125865369_RABGAP1_NM_+|	325.867	-1.70471	0.564045	3.02229	0.00250866	0.0365737	60.1802	125.486	81.2737	214.503	332.783	216.462	634.207	524.545	382.287	423.208	492.805	422.661	17.3221	57.0525	-1.51658	0.203097	-1.71968	RABGAP1	-	chr9_123095724_+
chr2:139264375-139264682:mpeak_103746|chr2_139259349_139326505_SPOPL_NM_+|	133.798	-2.03174	0.672252	3.02229	0.00250869	0.0365737	101.843	220.047	185.625	190.154	309.695	264.046	66.3525	63.0405	115.389	17.3921	26.2723	45.7183	207.334	854.634	-0.589924	1.45343	-2.04335	SPOPL	-	chr2_138506953_+
chr9:88583096-88583146:mpeak_184505|chr9_88556056_88636815_NAA35_NM_+|	26.2741	-2.40817	0.797059	3.02132	0.00251674	0.0366125	6.17233	11.2997	12.0405	16.2327	23.0878	27.0578	67.8956	40.4411	47.1588	16.2327	10.3497	37.321	18.9797	103.873	-1.16938	1.28291	-2.45229	NAA35	-	chr9_85968231_+
chr19:44282705-44282884:mpeak_92667|chr19_44271241_44285409_KCNN4_NM_-|	31.2079	-3.92618	1.30019	3.0197	0.00253021	0.0366962	0	0.594722	1.00338	23.1895	9.55358	7.46421	80.2403	30.3308	27.0912	92.758	50.9524	51.3164	1.74133	20.6163	-4.65303	-0.50254	-4.15049	KCNN4	-	chr19_43778654_-
chr17:5290916-5290984:mpeak_75969|chr17_5289589_5323059_NUP88_NM_-|	20.0585	-3.27012	1.08513	3.01359	0.00258179	0.0371471	1.54308	0	4.01351	11.5948	6.36905	6.53118	69.4387	42.82	27.0912	37.1032	12.7381	21.4596	5.98127	34.3544	-2.14021	0.966719	-3.10693	NUP88	chr17:5290924:-	-
chr3:5022502-5022666:mpeak_120802|chr3_5021096_5024520_BHLHE40_NM_+|	169.596	-2.11159	0.700897	3.01269	0.00258942	0.0371471	57.094	82.0716	38.1284	787.284	428.319	401.201	38.577	22.0047	18.0608	81.1633	42.9911	38.2541	225.443	995.517	-3.18893	-1.04624	-2.14268	BHLHE40	-	chr3_4980867_+
chr20:55763088-55763150:mpeak_114614|chr20_55746164_55841707_BMP7_NM_-|	1763.01	-3.35705	1.11411	3.0132	0.00258507	0.0371471	0	0.594722	3.01014	3.47843	11.1458	6.53118	7240.14	3965.6	2200.41	4087.15	2267.38	1370.62	0.0403344	0.273852	-2.55302	0.795261	-3.34828	BMP7	chr20:55763098:-	-
chr2:142800381-142800478:mpeak_104216|chr2_140990895_142889270_LRP1B_NM_-|	9.30124	-3.47163	1.15335	3.01004	0.00261211	0.0372256	3.08616	2.97361	3.01014	4.6379	39.0104	26.1247	6.17233	7.13666	6.02027	3.47843	7.16518	2.79908	46.9232	519.041	-2.94351	0.523965	-3.46748	LRP1B	-	chr2_142042797_-
chr7:157168013-157168068:mpeak_172654|chr7_157129709_157208709_DNAJB6_NM_+|	200.079	-2.55249	0.847989	3.01006	0.002612	0.0372256	7.71541	1.18944	3.01014	4.6379	3.98066	10.2633	754.567	447.231	588.983	249.287	164.003	166.079	0.665352	3.25904	-0.664222	1.62803	-2.29226	DNAJB6	-	chr7_157375368_+
chr22:43231923-43232059:mpeak_120172|chr22_43193611_43253408_ARFGAP3_NM_-|	45.3796	-2.0713	0.689138	3.00563	0.00265028	0.037522	6.17233	14.868	9.03041	26.6679	13.5342	11.1963	112.645	102.887	120.405	45.2195	39.0104	42.9192	8.95131	40.4238	-0.773364	1.40167	-2.17503	ARFGAP3	-	chr22_42835938_-
chr2:240922049-240922121:mpeak_109890|chr2_240900603_240964819_NDUFA10_NM_-|	67.201	-2.75847	0.918646	3.00276	0.00267543	0.0377209	0	0.594722	10.0338	12.7542	15.9226	9.33026	237.635	153.438	103.348	113.629	78.817	70.91	3.22453	14.4319	-1.83833	0.908727	-2.74706	NDUFA10	-	chr2_239982648_-
chr20:46362913-46363037:mpeak_113456|chr20_46287136_46415360_SULF2_NM_-|	667.159	-2.30137	0.766638	3.0019	0.00268304	0.0377611	3.08616	7.73138	3.01014	25.5085	20.6994	11.1963	1830.1	1695.55	964.247	1386.73	1341.48	716.564	0.307973	1.66641	-2.0536	0.38227	-2.43587	SULF2	chr20:46362917:-;chr20:46362943:-	chr20_47734180_-
chr14:75613034-75613289:mpeak_58658|chr14_75601709_75643349_TMED10_NM_-|	512.403	-2.05824	0.686225	2.99936	0.00270548	0.0379604	23.1462	10.705	15.0507	27.8274	27.0685	26.1247	2218.95	996.754	1045.52	835.982	440.261	481.442	1.1476	4.60951	-0.728399	1.27759	-2.00599	TMED10	-	chr14_75146341_-
chr19:39332215-39332373:mpeak_92067|chr19_39327420_39342979_HNRNPL_NM_-mpeak_92067|chr19_39327420_39342979_HNRNPL_NM_-||	70.9128	-2.46478	0.822307	2.9974	0.00272294	0.0380523	12.3447	5.94722	6.02027	27.8274	20.6994	12.1293	308.616	142.139	70.2365	90.4391	72.448	82.1063	4.66652	24.7583	-1.31898	1.08852	-2.40749	HNRNPL	chr19:39332218:-	-
chr15:60687606-60687677:mpeak_63844|chr15_60639888_60690185_ANXA2_NM_-|	326.347	-4.35949	1.45434	2.99758	0.00272136	0.0380523	0	0.594722	0	6.95685	4.77679	2.79908	1285.39	736.86	310.044	838.301	467.329	263.113	0.0764984	0.926392	-4.61095	0.572139	-5.18308	ANXA2	chr15:60687599:-	chr15_60395409_-
chr8:141595406-141595477:mpeak_180814|chr8_141542251_141645646_AGO2_NM_-|	178.475	-3.27005	1.09124	2.99662	0.00272989	0.0380724	1.54308	1.18944	0	3.47843	7.16518	5.59816	501.502	416.9	375.264	344.364	312.084	172.61	0.316835	1.95906	-2.5714	0.64192	-3.21332	AGO2	chr8:141595412:-	chr8_140585311_-
chr3:125093165-125093362:mpeak_128027|chr3_124952783_125094198_ZNF148_NM_-|	293.254	-1.6839	0.562689	2.9926	0.00276613	0.038307	109.559	105.266	109.368	133.34	196.644	118.494	595.63	666.683	657.213	163.486	385.328	278.042	16.8892	54.239	-0.468187	1.21504	-1.68323	ZNF148	-	chr3_125374440_-
chr22:50642999-50643130:mpeak_120593|chr22_50639407_50655633_SELO_NM_+|	15.8346	-2.43843	0.816228	2.98744	0.00281328	0.0386462	7.71541	7.13666	7.02365	31.3058	18.311	10.2633	27.7755	26.1678	18.0608	13.9137	11.1458	11.1963	30.3812	165.16	-1.45275	0.989864	-2.44261	SELO	-	chr22_50204644_+
chr20:1116672-1116826:mpeak_110193|chr20_1093905_1145672_PSMF1_NM_+|	57.204	-4.05614	1.35852	2.9857	0.00282927	0.0387525	0	1.18944	0	2.31895	9.55358	2.79908	246.893	126.676	66.223	117.107	60.506	53.1825	0.811368	6.35697	-3.62467	0.930206	-4.55487	PSMF1	chr20:1116684:+	-
chr12:133115335-133115420:mpeak_48543|chr12_133067156_133159556_FBRSL1_NM_+|	61.997	-2.83394	0.949144	2.98579	0.00282849	0.0387525	0	1.78417	2.00676	8.11633	6.36905	10.2633	165.11	111.808	124.419	148.413	89.1667	76.5081	1.41686	7.87954	-2.70673	0.353644	-3.06037	FBRSL1	chr12:133115399:+	chr12_132538810_+
chr1:24020272-24020414:mpeak_1971|chr1_24018268_24022833_RPL11_NM_+|	420.889	-2.84258	0.951991	2.98593	0.00282715	0.0387525	4.62925	4.16305	2.00676	23.1895	5.57292	2.79908	1919.59	939.66	726.446	644.668	310.491	467.446	0.30117	2.21857	-1.54726	1.33372	-2.88098	RPL11	chr1:24020339:+;chr1:24020374:+	chr1_23693820_+;chr1_23693865_+;chr1_23693909_+
chr3:124804319-124804482:mpeak_127958|chr3_124802896_124931609_SLC12A8_NM_-|	11.7537	-3.60607	1.20885	2.98305	0.0028539	0.0389218	1.54308	0.594722	1.00338	5.79738	6.36905	9.33026	35.4909	19.6258	16.0541	24.349	8.75745	12.1293	4.41359	47.5214	-2.77474	0.653821	-3.42856	SLC12A8	-	chr3_125085446_-
chr1:155497058-155497204:mpeak_12363|chr1_155307542_155532324_ASH1L_NM_-|	158.396	-2.00926	0.673592	2.98291	0.00285526	0.0389291	21.6031	54.7144	53.1791	34.7843	69.2634	66.2449	313.246	456.746	440.483	76.5254	132.954	181.007	10.698	43.6104	-0.395101	1.63223	-2.02733	ASH1L	-	chr1_155527282_-
chr11:62140527-62140599:mpeak_31987|chr11_62104773_62159550_ASRGL1_NM_+|	84.4364	-2.36759	0.794269	2.98084	0.00287463	0.0390846	6.17233	4.16305	4.01351	5.79738	7.96132	5.59816	364.167	217.668	186.628	95.077	52.5447	63.4458	1.86722	9.17093	-0.431905	1.86427	-2.29618	ASRGL1	-	chr11_62373112_+
chr4:22461552-22461683:mpeak_134882|chr4_22390570_22517677_ADGRA3_NM_-|	13.2202	-2.6444	0.887316	2.98022	0.00288037	0.0391033	1.54308	9.51555	6.02027	11.5948	21.4956	21.4596	21.6031	25.573	12.0405	8.11633	10.3497	9.33026	28.8413	196.249	-1.67536	1.09111	-2.76647	ADGRA3	-	chr4_22459996_-
chr8:62577827-62578202:mpeak_175352|chr8_62416068_62627199_ASPH_NM_-|	34.6596	-2.60791	0.875498	2.97877	0.00289408	0.0391704	7.71541	26.1678	32.1081	22.03	89.1667	109.164	27.7755	34.4939	22.0743	11.5948	21.4956	12.1293	78.2409	487.312	-1.73952	0.89933	-2.63885	ASPH	-	chr8_61665334_-;chr8_61665557_-
chr4:100870010-100870299:mpeak_138398|chr4_100869680_100871512_H2AFZ_NM_-|	838.931	-2.72324	0.916579	2.97109	0.00296741	0.0397103	13.8877	5.3525	2.00676	26.6679	8.75745	10.2633	4007.38	1646.78	1786.01	805.835	384.532	1369.68	0.285571	1.78468	-1.10458	1.53917	-2.64374	H2AFZ	-	chr4_99948982_-
chr5:174945619-174945948:mpeak_152228|chr5_174905513_174953640_SFXN1_NM_+|	97.5708	-2.52157	0.84919	2.96938	0.00298402	0.039867	1.54308	7.73138	8.02703	12.7542	8.75745	45.7183	303.987	187.337	174.588	156.529	125.789	138.088	2.59816	15.9917	-1.95821	0.66355	-2.62176	SFXN1	-	chr5_175518927_+
chr3:142316276-142316350:mpeak_129658|chr3_142315228_142430713_PLS1_NM_+|	8.82356	-3.28595	1.10671	2.96913	0.00298648	0.0398723	4.62925	1.78417	3.01014	4.6379	9.55358	5.59816	32.4047	19.0311	11.0372	1.15948	5.57292	7.46421	15.0842	139.397	-1.0704	2.13769	-3.20809	PLS1	chr3:142316284:+	-
chr11:108107207-108107349:mpeak_35803|chr11_108093558_108236051_ATM_NM_+|	13.4826	-2.8242	0.952285	2.96571	0.00301981	0.0401258	0	2.97361	7.02365	9.2758	23.0878	17.7275	20.0601	26.7625	14.0473	8.11633	15.9226	16.7945	24.636	122.672	-2.32495	0.575977	-2.90093	ATM	-	chr11_108236529_+
chr12:67704718-67704776:mpeak_43251|chr12_67663060_67706385_CAND1_NM_+|	144.437	-3.37695	1.13976	2.96285	0.00304802	0.0403409	0	0.594722	2.00676	3.47843	9.55358	4.66513	557.053	310.445	174.588	245.809	208.586	216.462	0.374462	2.63799	-2.76611	0.635395	-3.40151	CAND1	chr12:67704781:+	-
chr19:36721245-36721607:mpeak_91671|chr19_36705503_36726560_ZNF146_NM_+|	99.2515	-1.58404	0.534871	2.96154	0.0030611	0.0404334	54.0079	45.1989	42.1419	176.24	156.838	116.628	114.188	80.8822	96.3243	82.3227	105.885	120.36	48.5076	145.74	-1.66973	-0.0826175	-1.58711	ZNF146	-	chr19_36230535_+
chr17:66513150-66513263:mpeak_83841|chr17_66409763_66547224_PRKAR1A_NM_+|	8.50609	-4.62245	1.56117	2.96089	0.0030675	0.0404541	4.62925	7.73138	21.0709	18.5516	11.942	20.5266	3.08616	3.56833	10.0338	0	0	0.933026	200.33	1822.75	-0.609856	4.16077	-4.77063	PRKAR1A	chr17:66513247:+	chr17_68517121_+;chr17_68517187_+
chr12:96405488-96405651:mpeak_45169|chr12_96394884_96437298_LTA4H_NM_-|	101.841	-1.99436	0.673502	2.96119	0.00306455	0.0404541	13.8877	30.9255	23.0777	28.9869	33.4375	42.9192	368.797	239.078	152.514	102.034	66.0789	120.36	8.92846	36.5177	-0.633811	1.3983	-2.03211	LTA4H	-	chr12_96011689_-
chr19:39339404-39339460:mpeak_92072|chr19_39327420_39342979_HNRNPL_NM_-mpeak_92072|chr19_39327420_39342979_HNRNPL_NM_-||	65.5962	-3.62251	1.22404	2.95948	0.00308163	0.0405237	3.08616	0	1.00338	5.79738	10.3497	0.933026	308.616	142.139	70.2365	90.4391	72.448	82.1063	1.17743	6.97166	-2.06231	1.08852	-3.15082	HNRNPL	-	chr19_38848725_-
chr12:50924289-50924646:mpeak_41069|chr12_50898767_51138369_DIP2B_NM_+|	98.0533	-1.97902	0.668692	2.95954	0.00308097	0.0405237	18.517	35.6833	47.1588	70.728	123.4	107.298	216.031	144.517	83.2804	132.18	108.274	89.5705	22.8374	91.3345	-1.57233	0.427431	-1.99976	DIP2B	-	chr12_50530560_+
chr4:102269070-102269413:mpeak_138636|chr4_102268933_102269480_FLJ20021_NR_+|	33.9052	-4.14485	1.40071	2.95912	0.00308521	0.040535	1.54308	0	0	8.11633	13.5342	16.7945	72.5248	28.5466	19.0642	103.193	60.506	83.0393	3.85335	15.5813	-4.63891	-1.03832	-3.60059	FLJ20021	chr4:102269402:+	chr4_101348241_+
chr12:116500131-116500362:mpeak_46992|chr12_116399203_116714991_MED13L_NM_-|	231.415	-1.6497	0.559152	2.95036	0.00317405	0.0412305	20.0601	29.7361	14.0473	26.6679	38.2143	34.522	655.81	548.928	552.862	275.955	272.277	307.899	3.63242	11.6109	-0.638768	1.0377	-1.67647	MED13L	-	chr12_116062471_-
chr12:120606040-120606127:mpeak_47435|chr12_120565778_120632513_GCN1L1_NM_-|	1264.34	-2.24293	0.761224	2.94648	0.00321414	0.0415132	6.17233	10.705	8.02703	32.4653	19.9033	21.4596	5218.7	2689.93	1503.06	2671.43	1519.82	1470.45	0.264611	1.30399	-1.56777	0.73322	-2.30099	GCN1L1	-	chr12_120168260_-
chr2:47391941-47392298:mpeak_98332|chr2_47387943_47404075_CALM2_NM_-|	109.785	-2.07511	0.704553	2.94529	0.00322653	0.0416393	40.1201	17.2469	18.0608	84.6417	39.0104	55.0485	325.59	139.165	210.709	102.034	112.255	173.543	11.1668	46.0769	-1.24438	0.800451	-2.04483	CALM2	-	chr2_47164953_-
chr2:157400104-157400226:mpeak_104778|chr2_157291964_157439304_GPD2_NM_+|	49.2618	-3.02892	1.02862	2.94466	0.00323314	0.0416794	3.08616	0.594722	2.00676	3.47843	10.3497	3.7321	182.084	115.376	91.3074	40.5816	46.1756	92.3696	1.46299	9.80324	-1.62641	1.11792	-2.74433	GPD2	-	chr2_156543673_+
chr1:108681246-108681309:mpeak_7658|chr1_108679459_108742980_SLC25A24_NM_-|	54.8457	-3.28597	1.11627	2.9437	0.00324311	0.0417514	3.08616	1.18944	1.00338	10.4353	5.57292	2.79908	212.945	119.539	120.405	25.5085	33.4375	122.226	1.16562	10.3809	-1.83296	1.3218	-3.15476	SLC25A24	chr1:108681254:-	chr1_108138635_-
chr16:2805924-2806332:mpeak_68017|chr16_2802329_2820858_SRRM2_NM_+|	308.283	-2.18199	0.741235	2.94372	0.00324293	0.0417514	138.877	85.0452	94.3176	439.441	249.189	211.797	592.543	502.54	431.453	154.21	182.314	617.663	20.8472	94.3658	-1.50049	0.677917	-2.17841	SRRM2	-	chr16_2756041_+;chr16_2756145_+
chr8:116451016-116451098:mpeak_178825|chr8_116427312_116681255_TRPS1_NM_-|	1669.09	-2.56405	0.871068	2.94357	0.00324449	0.0417578	3.08616	4.75777	2.00676	2.31895	25.4762	25.1917	3382.44	3674.79	3557.98	2258.66	4295.13	2797.21	0.092798	0.566644	-2.42734	0.182939	-2.61028	TRPS1	-	chr8_115438788_-
chr3:152026825-152026982:mpeak_130280|chr3_151985828_152180173_MBNL1_NM_+|	73.0929	-2.56934	0.873348	2.94194	0.00326165	0.0418997	0	5.3525	7.02365	1.15948	9.55358	12.1293	268.496	163.548	220.743	42.9006	61.3021	84.9054	2.84384	12.079	-0.884152	1.7874	-2.67156	MBNL1	-	chr3_152309101_+
chr8:100905393-100905456:mpeak_177774|chr8_100890493_100906242_COX6C_NM_-|	615.957	-2.66073	0.904586	2.94138	0.00326751	0.0419179	3.08616	4.16305	1.00338	9.2758	4.77679	6.53118	2819.21	1037.19	1524.13	841.779	373.386	766.948	0.153379	1.03848	-1.31859	1.44071	-2.7593	COX6C	-	chr8_99893126_-
chr6:109695222-109695711:mpeak_159583|chr6_109690220_109703762_CD164_NM_-|	79.6513	-1.6983	0.577699	2.93976	0.00328464	0.0420288	63.2664	56.4986	54.1824	53.3359	119.42	94.2356	141.964	101.697	105.355	61.4522	49.3602	55.0485	49.8394	160.973	-0.618142	1.07332	-1.69146	CD164	-	chr6_109374371_-
chr10:63745481-63745616:mpeak_23122|chr10_63661012_63850620_ARID5B_NM_+|	65.0395	-3.17158	1.07887	2.93973	0.00328499	0.0420288	1.54308	1.78417	1.00338	1.15948	19.9033	31.7229	109.559	123.702	76.2568	119.426	181.518	112.896	1.39915	12.7551	-3.6075	-0.419052	-3.18845	ARID5B	-	chr10_61985775_+
chrX:135961440-135961750:mpeak_193346|chrX_135956611_135962939_RBMX_NR_-mpeak_193346|chrX_135952576_135962939_RBMX_NM_-||	125.132	-2.1635	0.736016	2.93947	0.00328776	0.0420415	7.71541	5.94722	3.01014	37.1032	11.942	13.0624	259.238	275.951	240.811	202.908	196.644	247.252	2.14855	9.60221	-1.89728	0.262726	-2.16	RBMX	chrX:135961588:-	chrX_136879428_-
chr12:48194779-48194928:mpeak_40509|chr12_48177669_48213763_HDAC7_NM_-|	1728.27	-3.48639	1.18606	2.93947	0.00328775	0.0420415	0	1.18944	0	6.95685	10.3497	10.2633	3529.03	3098.5	1999.73	5014.73	3728.28	3340.23	0.0413611	0.228166	-4.53473	-0.486034	-4.0487	HDAC7	-	chr12_47801056_-
chr2:99936784-99936846:mpeak_101761|chr2_99936262_99952860_TXNDC9_NM_-|	5.51863	-4.47788	1.5271	2.93227	0.0033649	0.0425818	0	4.75777	7.02365	10.4353	11.1458	17.7275	4.62925	6.54194	2.00676	1.15948	0.796132	0	134.104	1340.03	-1.73833	2.75244	-4.49077	TXNDC9	-	chr2_99320314_-
chr1:117493865-117493957:mpeak_9227|chr1_117452544_117529422_PTGFRN_NM_+|	245.729	-2.6481	0.903061	2.93236	0.00336399	0.0425818	1.54308	7.13666	7.02365	11.5948	35.8259	12.1293	973.685	551.902	302.017	534.518	335.968	175.409	0.859234	5.69369	-1.92303	0.805216	-2.72824	PTGFRN	-	chr1_116951327_+
chr10:81112233-81112293:mpeak_24557|chr10_81107219_81113462_PPIF_NM_+|	57.8174	-2.59528	0.887246	2.9251	0.00344346	0.0431395	20.0601	5.94722	11.0372	64.9306	17.5149	20.5266	209.859	104.076	61.2061	84.6417	50.1563	43.8522	9.87479	57.6389	-1.47492	1.0703	-2.54522	PPIF	-	chr10_79352557_+
chr3:148782029-148782087:mpeak_129876|chr3_148750159_148804341_HLTF_NM_-|	35.8676	-2.58153	0.882903	2.92391	0.00345661	0.0431904	3.08616	4.16305	1.00338	9.2758	11.1458	10.2633	109.559	88.6135	48.1622	28.9869	46.1756	69.977	3.35016	21.1417	-1.89461	0.763179	-2.65779	HLTF	-	chr3_149064249_-
chrX:47073215-47073359:mpeak_190984|chrX_47050198_47074192_UBA1_NM_+|	301.824	-2.96554	1.01443	2.92335	0.00346289	0.0432485	3.08616	2.37889	3.01014	20.8706	6.36905	2.79908	1365.63	792.764	310.044	527.561	360.648	226.725	0.343342	2.69421	-1.8255	1.14664	-2.97214	UBA1	-	chrX_47213888_+
chr8:93921739-93921795:mpeak_176872|chr8_93898963_93978372_TRIQK_NM_-|	19.5095	-3.97519	1.36114	2.9205	0.00349474	0.0433954	0	1.18944	0	1.15948	7.16518	6.53118	50.9217	35.0886	54.1824	11.5948	21.4956	44.7853	2.5453	19.0764	-3.64267	0.848169	-4.49084	TRIQK	-	chr8_92909492_-
chr1:113496225-113496341:mpeak_8491|chr1_113456787_113498975_SLC16A1_NM_-|	89.4159	-2.25866	0.773355	2.9206	0.00349359	0.0433954	10.8016	11.8944	11.0372	42.9006	14.3304	18.6605	353.366	179.606	126.426	140.297	89.9629	73.7091	5.11576	24.9669	-1.16977	1.11723	-2.287	SLC16A1	-	chr1_112953643_-
chr10:16790755-16790985:mpeak_20398|chr10_16635495_16859453_RSU1_NM_-|	12.3561	-3.29553	1.12939	2.91798	0.00352308	0.0436376	1.54308	4.16305	1.00338	9.2758	9.55358	4.66513	54.0079	20.2205	15.0507	18.5516	5.57292	4.66513	7.51521	81.6075	-1.80804	1.63277	-3.44082	RSU1	-	chr10_16748711_-
chr5:139611916-139612162:mpeak_150362|chr5_139554652_139622889_CYSTM1_NM_+|	20.8906	-2.72203	0.934086	2.9141	0.00356711	0.0439475	6.17233	14.868	5.01689	33.6248	11.1458	19.5936	64.8094	19.6258	34.1149	18.5516	6.36905	16.7945	21.98	154.295	-1.30457	1.50685	-2.81143	CYSTM1	-	chr5_140232384_+
chr6:33240867-33240934:mpeak_155554|chr6_33239851_33244167_RPS18_NM_+|	459.476	-2.86615	0.983891	2.91308	0.00357884	0.0440008	1.54308	2.37889	1.00338	10.4353	3.18453	8.39724	1819.29	859.968	840.831	1009.9	437.076	519.696	0.139921	1.11951	-2.16032	0.839855	-3.00018	RPS18	-	chr6_33273165_+
chr19:39139281-39139738:mpeak_92035|chr19_39138266_39219913_ACTN4_NM_+|	843.634	-2.18244	0.75011	2.9095	0.00362011	0.0443577	240.721	136.786	230.777	328.132	242.82	187.538	3848.45	1738.37	1281.31	445.239	335.968	1107.5	8.85661	40.1592	-0.318385	1.86252	-2.1809	ACTN4	-	chr19_38648694_+;chr19_38648978_+
chr1:119628023-119628177:mpeak_9503|chr1_119576011_119683295_WARS2_NM_-|	21.6723	-2.7649	0.95166	2.90534	0.00366855	0.0446927	6.17233	5.94722	2.00676	5.79738	11.942	13.9954	94.128	43.4147	23.0777	25.5085	10.3497	17.7275	8.79484	59.2224	-1.16768	1.58374	-2.75142	WARS2	chr1:119628074:-	-
chr6:42851082-42851194:mpeak_156610|chr6_42847670_42853993_RPL7L1_NM_+|	224.13	-2.31767	0.800321	2.89593	0.00378039	0.0453418	6.17233	10.705	7.02365	44.0601	30.253	20.5266	776.17	449.015	230.777	583.216	304.918	226.725	1.64159	8.50687	-1.98842	0.385111	-2.37353	RPL7L1	-	chr6_42883461_+
chr2:65301488-65301630:mpeak_99373|chr2_65283494_65310772_CEP68_NM_+|	46.2858	-2.23174	0.771199	2.89386	0.00380539	0.0455497	10.8016	2.97361	7.02365	15.0732	7.96132	4.66513	117.274	136.786	134.453	34.7843	45.3795	38.2541	5.35345	23.3914	-0.413364	1.71408	-2.12744	CEP68	chr2:65301624:+	chr2_65074488_+
chr5:96070525-96070652:mpeak_147292|chr5_95997740_96108343_CAST_NM_+|	40.3197	-2.31271	0.799245	2.89362	0.00380835	0.0455622	7.71541	5.3525	3.01014	3.47843	9.55358	16.7945	126.533	111.808	76.2568	35.9437	39.8066	47.5843	5.11068	24.1834	-0.891502	1.35093	-2.24243	CAST	-	chr5_96734913_+
chr2:62114380-62114843:mpeak_99112|chr2_62095841_62115806_CCT4_NM_-|	284.925	-2.30708	0.798206	2.89034	0.00384829	0.045877	18.517	11.2997	10.0338	41.7411	22.2917	54.1155	1202.06	481.725	340.145	611.043	249.189	376.943	1.96896	9.54984	-1.56793	0.71011	-2.27804	CCT4	-	chr2_61887614_-
chr8:102602189-102602265:mpeak_178082|chr8_102504667_102678816_GRHL2_NM_+|	186.934	-2.14242	0.741833	2.88801	0.00387687	0.046046	1.54308	14.868	16.0541	16.2327	34.2337	46.6513	586.371	385.38	317.068	307.261	240.432	277.109	2.51899	11.7747	-1.58084	0.64393	-2.22477	GRHL2	chr8:102602273:+	-
chr13:52366980-52367130:mpeak_51771|chr13_52343429_52378298_DHRS12_NM_-|	8.54531	-3.04792	1.05586	2.88666	0.0038935	0.0461967	6.17233	1.18944	3.01014	20.8706	18.311	13.9954	7.71541	10.1103	5.01689	2.31895	6.36905	7.46421	45.406	329.224	-2.35812	0.499993	-2.85811	DHRS12	-	chr13_51792927_-
chr7:101471516-101471673:mpeak_169006|chr7_101459183_101926312_CUX1_NM_+|	46.823	-2.81504	0.976	2.88427	0.00392328	0.0464118	4.62925	10.1103	9.03041	44.0601	34.2337	17.7275	180.541	88.0188	16.0541	76.5254	50.1563	30.7899	8.35165	60.9769	-2.01422	0.853913	-2.86813	CUX1	-	chr7_101828306_+
chr2:191778217-191778357:mpeak_106800|chr2_191745546_191827555_GLS_NM_+|	25.8957	-2.79031	0.968116	2.8822	0.00394904	0.046606	0	10.1103	15.0507	3.47843	11.942	6.53118	37.034	97.5344	100.338	8.11633	10.3497	10.2633	16.0666	76.4083	0.196861	3.03149	-2.83463	GLS	chr2:191778289:+	chr2_190913579_+
chr14:50982531-50982833:mpeak_55596|chr14_50886824_50999376_MAP4K5_NM_-|	66.3049	-1.74529	0.607328	2.87371	0.00405677	0.0473316	30.8616	26.7625	32.1081	46.379	91.5551	62.5128	114.188	97.5344	91.3074	46.379	90.759	65.3118	29.6117	99.0106	-1.15952	0.581895	-1.74142	MAP4K5	chr14:50982753:-	chr14_50516025_-
chr13:96407147-96407297:mpeak_52573|chr13_96329392_96443126_DNAJC3_NM_+|	25.1654	-2.30109	0.80092	2.87306	0.0040652	0.0473718	4.62925	7.13666	8.02703	3.47843	11.942	16.7945	74.0679	49.3619	65.2196	16.2327	19.9033	25.1917	10.4919	52.5291	-0.702741	1.6211	-2.32384	DNAJC3	-	chr13_95755042_+
chr12:15836438-15836593:mpeak_38659|chr12_15774364_15942510_EPS8_NM_-|	45.2058	-2.63166	0.916046	2.87284	0.00406795	0.0473808	1.54308	7.13666	9.03041	2.31895	35.0298	19.5936	117.274	105.266	89.3007	52.1764	36.6221	67.1779	5.67923	36.507	-1.68492	0.999482	-2.68441	EPS8	-	chr12_15683509_-
chr10:72168566-72168627:mpeak_23732|chr10_72163860_72181471_EIF4EBP2_NM_+|	74.9027	-2.37555	0.827126	2.87206	0.0040781	0.0474292	3.08616	1.78417	4.01351	8.11633	3.98066	6.53118	226.833	164.143	222.75	100.874	65.2828	91.4366	1.44753	7.23161	-1.06823	1.2525	-2.32073	EIF4EBP2	-	chr10_70408859_+
chr5:96090348-96090447:mpeak_147300|chr5_96079243_96108971_CAST_NR_+mpeak_147300|chr5_95997740_96108343_CAST_NM_+||	38.4387	-2.60707	0.908214	2.87055	0.00409758	0.0475395	1.54308	2.37889	3.01014	2.31895	10.3497	3.7321	126.533	111.808	76.2568	35.9437	39.8066	47.5843	2.20349	13.2978	-1.2424	1.35093	-2.59333	CAST	-	chr5_96754682_+;chr5_96754741_+
chr15:65834105-65834266:mpeak_64372|chr15_65822826_65868640_HACD3_NM_+|	53.7997	-3.34874	1.16681	2.86999	0.00410487	0.0475777	1.54308	0.594722	1.00338	3.47843	2.38839	8.39724	231.462	111.808	75.2534	75.3659	70.8557	63.4458	0.750539	6.80318	-2.183	0.997206	-3.18021	HACD3	-	chr15_65541919_+
chr11:63719205-63719399:mpeak_32299|chr11_63706441_63721809_NAA40_NM_+|	77.6015	-2.17849	0.759224	2.86936	0.00411301	0.0476256	3.08616	6.54194	10.0338	76.5254	53.3408	118.494	80.2403	66.6088	33.1115	216.822	154.45	111.963	10.9257	51.3954	-3.65896	-1.42504	-2.23392	NAA40	-	chr11_63951918_+
chr8:74881092-74881420:mpeak_175938|chr8_74859055_74884522_TCEB1_NM_-|	43.2589	-2.28911	0.798092	2.86823	0.00412773	0.047728	33.9478	43.4147	54.1824	83.4822	70.8557	50.3834	66.3525	28.5466	44.1487	12.7542	3.98066	27.0578	94.6041	467.479	-0.638106	1.66682	-2.30493	TCEB1	-	chr8_73968838_-
chr3:184051071-184051588:mpeak_132415|chr3_184032282_184052514_EIF4G1_NM_+|	699.188	-2.10382	0.734459	2.86444	0.00417743	0.0481138	63.2664	36.278	15.0507	113.629	80.4093	66.2449	2830.01	1427.33	963.243	919.464	749.16	1126.16	2.19506	9.31315	-1.18353	0.901474	-2.08501	EIF4G1	-	chr3_184333709_+
chr4:170590309-170590469:mpeak_141821|chr4_170541671_170641057_CLCN3_NM_+|	38.0963	-2.36794	0.826926	2.86354	0.0041893	0.0481688	6.17233	1.78417	5.01689	6.95685	15.9226	9.33026	109.559	100.508	57.1926	39.4222	60.506	44.7853	4.85423	22.2576	-1.31194	0.885042	-2.19698	CLCN3	-	chr4_169669254_+
chr1:109909045-109909218:mpeak_8000|chr1_109856679_109940563_SORT1_NM_-|	129.356	-2.6434	0.924371	2.85967	0.00424077	0.048456	0	5.3525	6.02027	19.7111	11.1458	9.33026	550.88	293.198	152.514	280.593	116.235	107.298	1.71175	7.97165	-1.82115	0.983217	-2.80437	SORT1	chr1:109909150:-	-
chr10:35696231-35696407:mpeak_21962|chr10_35535908_35857981_CCNY_NM_+|	101.8	-2.02651	0.708866	2.8588	0.00425246	0.0485106	13.8877	19.0311	26.0878	26.6679	38.2143	27.9908	418.175	194.474	160.541	144.934	78.817	72.776	7.63159	31.3202	-0.654382	1.38266	-2.03704	CCNY	-	chr10_35407411_+
chr3:156867072-156867668:mpeak_130652|chr3_156864396_156878549_CCNL1_NM_-|	24.7257	-2.88486	1.00966	2.85726	0.0042731	0.0486482	47.8355	35.6833	62.2095	34.7843	42.9911	35.455	10.8016	15.4628	8.02703	0	1.59226	1.86605	424.971	2182.77	0.36402	3.3097	-2.94568	CCNL1	-	chr3_157149389_-;chr3_157149544_-;chr3_157149749_-
chr9:101987463-101987566:mpeak_185800|chr9_101984569_101992618_SEC61B_NM_+|	66.5536	-3.01305	1.05492	2.85619	0.0042876	0.0486869	3.08616	5.3525	5.01689	19.7111	2.38839	5.59816	347.193	94.5608	169.571	41.7411	16.7188	87.7045	2.20105	18.9497	-1.04156	2.06435	-3.10591	SEC61B	-	chr9_99225236_+
chr4:39733224-39733343:mpeak_135524|chr4_39699663_39779979_UBE2K_NM_+|	118.293	-1.86871	0.65419	2.85653	0.00428302	0.0486869	12.3447	16.0575	32.1081	24.349	31.8453	44.7853	387.314	216.479	261.882	103.193	136.138	153.016	6.98996	25.7372	-0.738811	1.14169	-1.8805	UBE2K	-	chr4_39731730_+
chr1:8724776-8724853:mpeak_646|chr1_8415180_8877699_RERE_NM_-|	32.2534	-2.73164	0.956322	2.8564	0.00428469	0.0486869	0	5.94722	2.00676	2.31895	9.55358	13.0624	100.3	63.0405	90.3041	18.5516	33.4375	48.5174	4.70381	24.8092	-1.64842	1.33552	-2.98394	RERE	-	chr1_8664737_-
chr17:19234775-19234963:mpeak_77589|chr17_19140689_19237268_EPN2_NM_+|	160.123	-2.32353	0.814323	2.85332	0.00432647	0.048953	1.54308	10.1103	6.02027	16.2327	13.5342	55.9816	279.298	354.454	332.118	244.649	351.89	255.649	1.82981	10.0621	-2.27851	0.180657	-2.45917	EPN2	chr17:19234877:+;chr17:19234964:+	chr17_19331466_+;chr17_19331560_+;chr17_19331650_+;chr17_19331507_+
chr19:39838518-39838784:mpeak_92126|chr19_39833098_39874138_SAMD4B_NM_+|	369.869	-3.22143	1.13125	2.84768	0.00440397	0.0494301	1.54308	3.56833	7.02365	13.9137	14.3304	10.2633	1771.46	610.779	915.081	92.758	79.6132	918.098	0.368028	3.53127	-1.66595	1.59634	-3.2623	SAMD4B	chr19:39838586:+	-
chr3:27511567-27511814:mpeak_122492|chr3_27418336_27525911_SLC4A7_NM_-|	48.6986	-2.25253	0.791787	2.84487	0.00444293	0.0496681	1.54308	6.54194	7.02365	9.2758	11.942	16.7945	112.645	115.376	128.432	28.9869	58.1176	87.7045	4.23861	21.745	-1.33109	1.02793	-2.35902	SLC4A7	-	chr3_27470246_-
chr3:12637299-12637459:mpeak_121446|chr3_12626156_12705700_RAF1_NM_-|	59.2703	-2.46827	0.867519	2.84521	0.00443822	0.0496681	41.6632	62.4458	37.125	133.34	60.506	55.9816	129.619	54.7144	59.1993	13.9137	9.55358	53.1825	57.9939	325.933	-0.822843	1.66776	-2.4906	RAF1	-	chr3_12595800_-
chr1:100475058-100475325:mpeak_7076|chr1_100435344_100487941_SLC35A3_NM_+|	28.1181	-2.41439	0.848594	2.84517	0.00443881	0.0496681	6.17233	16.0575	15.0507	18.5516	36.6221	33.5889	58.6371	40.4411	49.1655	4.6379	34.2337	24.2587	25.1481	140.602	-1.25153	1.23157	-2.4831	SLC35A3	-	chr1_100009757_+
chr10:75512153-75512214:mpeak_24079|chr10_75504130_75530712_SEC24C_NM_+|	51.4554	-3.14317	1.10491	2.84473	0.00444494	0.0496762	0	0.594722	2.00676	5.79738	4.77679	4.66513	155.851	127.865	84.2838	85.8012	58.1176	87.7045	1.06038	6.57935	-2.55039	0.667927	-3.21832	SEC24C	chr10:75512228:+	-
chr6:152410159-152410320:mpeak_162401|chr6_152011630_152419866_ESR1_NM_+|	1030.57	-2.16179	0.760437	2.84283	0.00447146	0.0498113	23.1462	24.9783	45.152	11.5948	76.4286	66.2449	2464.3	2516.27	3855.98	869.606	1284.16	1128.96	1.05558	4.69939	-0.725854	1.42859	-2.15444	ESR1	-	chr6_152089212_+
chr4:13628066-13628464:mpeak_134510|chr4_13571752_13629328_BOD1L1_NM_-|	19.5605	-2.72361	0.958149	2.84258	0.00447503	0.0498278	21.6031	27.3572	14.0473	69.5685	35.8259	26.1247	4.62925	13.0839	13.0439	0	4.77679	4.66513	204.856	928.619	-1.06167	1.70376	-2.76544	BOD1L1	-	chr4_13626436_-
chr7:138744944-138745294:mpeak_171346|chr7_138732599_138794465_ZC3HAV1_NM_-|	252.646	-2.2186	0.780786	2.8415	0.00449019	0.0499063	263.867	190.311	59.1993	322.334	161.615	94.2356	645.008	598.885	318.071	137.978	132.954	107.298	32.8674	152.866	-0.17151	2.04603	-2.21754	ZC3HAV1	chr7:138745086:-	chr7_139060342_-;chr7_139060388_-
