# Supplementary material for: Compartment-specific and ELAVL1-coordinated regulation of intronic polyadenylation isoforms by doxorubicin
Source: HighWire-hosted journal article supplement (doi:10.1101/gr.276192.121), 2022-07-01
Supplement: Supplemental_Table_S5.xlsx.xlsx [file Supplemental_Table_S5.xlsx.xlsx]

## Sheet: Sheet1
Supplemental Table S5 : List of annotated IPA isoforms regulated by 18-hour doxorubicin in MCF-7 cell cytosol by 3’-seq analysis.
IPA peaks	baseMean	log2FoldChange IPA:LE	lfcSE	stat	pvalue	padj	3	13	23	1	11	21	LE,03	LE,13	LE,23	LE,01	LE,11	LE,21	%IPA (+doxo)	%IPA (-doxo)	log2FC_IPA	log2FC_LE	log2FC IPA-logFC LE	gene	Tian polyA site	Zavolan polyA site
chrX:70587121-70587279:mpeak_85357|chrX_70586088_70749562_TAF1_NR_+mpeak_85357|chrX_70586088_70683673_TAF1_NM_+||	68.2442	2.64704	0.561674	-4.71277	2.44376e-06	0.000153494	19.6342	27.0163	22.7301	20.1075	27.8011	12.0503	26.6465	33.4488	49.4715	167.854	246.84	165.33	63.3228	10.3373	0.210559	-2.4043	2.61486	TAF1	chrX:70587179:+	chrX_71367328_+
chrX:47720384-47720456:mpeak_84907|chrX_47696300_47774322_ZNF81_NM_+|	9.00725	4.95134	1.46352	-3.38317	0.000716539	0.0118579	21.0367	23.1568	24.0672	5.24543	4.21229	6.74818	1.40245	0	1.33707	14.8621	5.05475	0.964026	1661.14	77.6114	2.07454	-2.93019	5.00472	ZNF81	chrX:47720443:+	chrX_47861058_+
chrX:41534060-41534153:mpeak_84794|chrX_41379849_41782287_CASK_NM_-|	51.4317	2.20527	0.599448	-3.67884	0.000234293	0.00541094	65.9149	115.784	102.954	28.8499	64.0269	52.0574	9.81712	16.7244	29.4155	47.2089	36.2257	48.2013	508.7	110.102	0.973808	-1.23416	2.20797	CASK	chrX:41534081:-	chrX_41674829_-
chrX:3527890-3527970:mpeak_84281|chrX_3526986_3631675_PRKX_NM_-|	173.963	1.3719	0.343536	-3.99347	6.51134e-05	0.00213381	98.1712	104.206	101.617	50.7058	87.6157	71.3379	169.696	195.547	199.223	383.791	287.278	338.373	53.8552	20.7698	0.535995	-0.838601	1.3746	PRKX	chrX:3527911:-	chrX_3609872_-;chrX_3609919_-
chrX:153353243-153353306:mpeak_86471|chrX_153296901_153363188_MECP2_NM_-|	65.342	1.2147	0.507293	-2.39447	0.0166445	0.102625	44.8782	117.071	68.1904	29.7241	32.0134	38.561	57.5003	95.2003	72.2016	79.5557	74.9788	74.23	102.329	43.8436	1.19821	-0.0245657	1.22277	MECP2	chrX:153353249:-	chrX_154087794_-;chrX_154087839_-
chrX:134027307-134027358:mpeak_86234|chrX_134023222_134049374_MOSPD1_NM_-|	32.9628	1.98342	0.8205	-2.41733	0.0156349	0.0986184	5.60978	10.2919	6.68533	4.37119	3.36983	1.44604	21.0367	57.8921	66.8533	75.1845	82.5609	60.2516	15.4937	4.21431	1.29782	-0.580495	1.87831	MOSPD1	chrX:134027304:-	chrX_134893255_-;chrX_134893324_-
chrX:109552372-109552430:mpeak_85883|chrX_109441862_109683461_AMMECR1_NM_-|	63.6534	1.80877	0.729975	-2.47785	0.0132176	0.0878805	4.20734	16.7244	5.34827	0.874238	2.52738	3.8561	88.354	124.79	144.403	108.406	122.156	142.194	7.35008	1.94704	1.85638	-0.0600989	1.91648	AMMECR1	chrX:109552378:-	chrX_110309151_-
chr9:99113438-99113555:mpeak_82400|chr9_99077181_99145992_SLC35D2_NR_-mpeak_82400|chr9_99083623_99145992_SLC35D2_NM_-||	59.5201	2.5655	0.847473	-3.02723	0.00246802	0.0266091	4.20734	15.4379	24.0672	3.49695	3.36983	0.482013	72.9271	151.806	127.021	88.2981	130.581	92.5465	12.427	2.35973	2.57246	0.175681	2.39678	SLC35D2	chr9:99113499:-	chr9_96351150_-;chr9_96351217_-
chr9:97784953-97785020:mpeak_82328|chr9_97488950_97848963_C9orf3_NM_+|	43.6199	1.50865	0.751838	-2.00661	0.0447908	0.202881	1.40245	6.43245	13.3707	4.37119	0	3.37409	71.5247	99.0598	68.1904	78.6815	85.9308	91.1004	8.88099	4.54335	1.45305	-0.0988727	1.55193	C9orf3	chr9:97785019:+	chr9_95022724_+
chr9:97784398-97784575:mpeak_82327|chr9_97488950_97848963_C9orf3_NM_+|	75.347	1.03083	0.39537	-2.60726	0.00912692	0.068383	100.976	101.633	65.5163	45.4604	55.6023	40.4891	71.5247	99.0598	68.1904	78.6815	85.9308	91.1004	112.292	55.3558	0.921577	-0.0988727	1.02045	C9orf3	chr9:97784453:+;chr9:97784562:+	chr9_95022183_+;chr9_95022279_+
chr9:84248380-84248441:mpeak_81912|chr9_84199220_84304450_TLE1_NM_-|	238.067	1.94541	0.550946	-3.53103	0.000413942	0.00813268	30.8538	106.779	60.168	80.4299	133.951	109.899	84.1467	132.509	102.954	626.829	787.699	600.588	61.8882	16.0924	-0.713193	-2.65648	1.94329	TLE1	chr9:84248387:-	chr9_81633469_-
chr9:5093692-5093901:mpeak_80932|chr9_4985244_5126683_JAK2_NM_+|	36.9371	5.27107	0.564931	-9.33046	1.05408e-20	1.09242e-17	86.9516	72.0435	48.1344	5.24543	7.58213	7.71221	14.0245	15.4379	14.7077	48.0831	57.2872	66.0358	468.936	11.9831	3.33404	-1.95628	5.29032	JAK2	chr9:5093799:+	chr9_5093788_+
chr9:5093227-5093422:mpeak_80931|chr9_4985244_5126683_JAK2_NM_+|	34.0556	6.58629	0.694346	-9.48561	2.4097e-21	3.3298e-18	86.9516	42.4542	56.1568	1.74848	3.36983	2.41006	14.0245	15.4379	14.7077	48.0831	57.2872	66.0358	420.109	4.39213	4.62342	-1.95628	6.5797	JAK2	chr9:5093277:+	chr9_5093278_+
chr9:5092352-5092415:mpeak_80928|chr9_4985244_5126683_JAK2_NM_+|	275.966	5.64495	0.44181	-12.7769	2.20821e-37	9.15412e-34	1053.24	876.1	943.969	81.3042	52.2324	89.1724	14.0245	15.4379	14.7077	48.0831	57.2872	66.0358	6505.1	129.931	3.68948	-1.95628	5.64576	JAK2	chr9:5092410:+	-
chr9:37781920-37782024:mpeak_81539|chr9_37780877_37785089_EXOSC3_NM_-|	48.4957	4.89863	0.894244	-5.47796	4.30266e-08	5.17005e-06	7.01223	16.7244	10.6965	3.49695	1.68492	0.482013	18.2318	59.1786	24.0672	127.639	167.649	145.086	33.9318	1.28615	2.60393	-2.11757	4.7215	EXOSC3	chr9:37781924:-;chr9:37781972:-	chr9_37781926_-
chr9:137989805-137989956:mpeak_83981|chr9_137967088_138011349_OLFM1_NM_+|	50.3601	0.905237	0.449466	-2.01403	0.0440066	0.200764	75.732	56.6056	58.8309	23.6044	18.5341	21.6906	60.3051	82.3354	72.2016	55.9513	30.3285	48.2013	88.9809	47.4633	1.58256	0.675874	0.906685	OLFM1	chr9:137989952:+	chr9_135097987_+;chr9_135098002_+;chr9_135098101_+
chr9:135533418-135533525:mpeak_83867|chr9_135470499_135545788_DDX31_NM_-|	15.7558	1.84968	0.804609	-2.29886	0.0215129	0.121501	7.01223	20.5838	13.3707	17.4848	23.5888	29.4028	5.60978	2.57298	2.67413	18.359	25.2738	23.1366	377.334	105.552	-0.782687	-2.62058	1.83789	DDX31	chr9:135533415:-;chr9:135533470:-	chr9_132658030_-;chr9_132658084_-
chr9:131035900-131035973:mpeak_83560|chr9_131019560_131038268_GOLGA2_NM_-|	493.475	2.00286	0.35538	-5.63583	1.74217e-08	2.44819e-06	44.8782	33.4488	53.4827	16.6105	22.7464	22.1726	653.539	729.44	597.669	1132.14	1388.37	1227.2	6.65487	1.64179	1.09911	-0.920039	2.01914	GOLGA2	chr9:131035919:-	chr9_128273641_-
chr9:127814437-127814547:mpeak_83377|chr9_127715232_127905838_SCAI_NM_-|	15.5234	2.93595	0.783016	-3.74954	0.000177157	0.00441085	7.01223	18.0109	21.3931	6.99391	7.58213	14.4604	2.80489	6.43245	9.35947	33.2211	28.6436	30.3668	249.592	31.4821	0.676763	-2.3102	2.98697	SCAI	chr9:127814412:-;chr9:127814483:-	chr9_125052133_-;chr9_125052205_-
chr9:126329527-126329589:mpeak_83318|chr9_126144904_126692417_DENND1A_NM_-|	19.8478	2.85375	0.907461	-3.14477	0.0016622	0.0208577	8.41467	10.2919	18.7189	1.74848	0.842459	3.8561	21.0367	48.8866	12.0336	40.215	41.2805	30.8488	45.6649	5.73865	2.53731	-0.454989	2.9923	DENND1A	chr9:126329535:-	chr9_123567257_-
chr9:126163810-126163969:mpeak_83313|chr9_126144904_126692417_DENND1A_NM_-|	93.636	1.59552	0.58621	-2.72176	0.0064936	0.0540151	193.537	239.287	208.582	63.8194	120.472	103.633	21.0367	48.8866	12.0336	40.215	41.2805	30.8488	782.615	256.287	1.15555	-0.454989	1.61054	DENND1A	chr9:126163775:-;chr9:126163826:-;chr9:126163868:-	chr9_123401590_-
chr9:125652439-125652507:mpeak_83250|chr9_125612101_125667562_RC3H2_NM_-|	44.6722	1.49223	0.586458	-2.54447	0.0109443	0.0773565	46.2807	64.3245	66.8533	13.9878	20.219	23.1366	58.9027	30.8758	66.8533	41.0892	70.7665	32.7769	113.297	39.6477	1.62978	0.114984	1.5148	RC3H2	chr9:125652450:-;chr9:125652487:-	chr9_122890171_-;chr9_122890226_-
chr9:123607741-123607814:mpeak_83134|chr9_123605319_123613515_PSMD5-AS1_NR_+|	7.10931	3.55841	1.68714	-2.10914	0.0349327	0.173015	5.60978	1.28649	2.67413	0.874238	10.952	0.482013	0	0	4.0112	18.359	22.7464	18.3165	79.5307	20.7133	-0.362969	-3.88889	3.52592	PSMD5-AS1	chr9:123607811:+	chr9_120845508_+
chr9:117390614-117390709:mpeak_83047|chr9_117373705_117405413_C9orf91_NM_+|	90.8191	1.41126	0.466523	-3.02506	0.00248586	0.0266972	29.4513	60.4651	25.4043	20.9817	21.0615	22.6546	123.415	142.8	98.9429	164.357	200.505	179.791	31.581	11.8787	0.833863	-0.576814	1.41068	C9orf91	chr9:117390676:+	chr9_114628417_+
chr9:116130835-116131033:mpeak_82990|chr9_116111811_116131895_BSPRY_NM_+|	278.446	1.49605	0.544089	-2.74963	0.00596618	0.050786	25.244	42.4542	16.0448	3.49695	10.952	14.4604	594.637	564.769	441.232	552.519	533.276	542.265	5.23185	1.77569	1.53443	-0.0245063	1.55894	BSPRY	chr9:116130908:+;chr9:116131032:+	chr9_113368626_+;chr9_113368749_+
chr9:101545846-101545905:mpeak_82535|chr9_101498905_101558794_ANKS6_NM_-|	31.4038	1.22393	0.579013	-2.11381	0.0345311	0.171404	58.9027	63.038	49.4715	19.2332	28.6436	16.3884	39.2685	12.8649	24.0672	18.359	21.0615	25.5467	224.949	98.9196	1.41536	0.230091	1.18527	ANKS6	chr9:101545852:-	chr9_98783573_-
chr8:95757080-95757311:mpeak_79301|chr8_95732102_95801973_DPY19L4_NM_+|	161.065	1.21418	0.541058	-2.24409	0.0248265	0.133834	21.0367	64.3245	57.4939	13.9878	25.2738	22.6546	215.977	342.206	302.177	242.164	325.189	300.294	16.6041	7.1361	1.20616	-0.0121678	1.21833	DPY19L4	chr8:95757214:+;chr8:95757312:+	chr8_94744980_+
chr8:90934864-90934968:mpeak_79114|chr8_90914095_90936730_OSGIN2_NM_+|	292.089	1.76295	0.349436	-5.04512	4.53234e-07	4.04061e-05	39.2685	48.8866	37.4379	20.1075	21.9039	18.7985	374.453	466.996	421.176	614.59	766.637	674.818	9.94697	2.95762	1.04638	-0.703446	1.74982	OSGIN2	chr8:90934916:+;chr8:90934942:+	chr8_89922688_+;chr8_89922734_+
chr8:59347606-59347673:mpeak_78523|chr8_59323822_59359947_UBXN2B_NM_+|	36.0015	1.68262	0.740321	-2.27282	0.0230371	0.127845	21.0367	27.0163	10.6965	3.49695	9.26704	1.92805	40.6709	95.2003	68.1904	54.2028	53.0749	47.2373	28.7901	9.5085	1.99954	0.401258	1.59828	UBXN2B	chr8:59347662:+	chr8_58435121_+
chr8:38122250-38122341:mpeak_78124|chr8_38122122_38126738_PPAPDC1B_NM_-|	36.6152	1.51794	0.576035	-2.63515	0.00841005	0.0646225	12.622	24.4433	33.4267	6.11967	9.26704	12.0503	71.5247	42.4542	45.4603	58.574	59.8146	63.6257	44.2125	15.0741	1.36133	-0.191045	1.55238	PPAPDC1B	chr8:38122257:-	chr8_38264742_-
chr8:33347795-33347858:mpeak_78037|chr8_33342684_33355949_MAK16_NM_+|	27.0503	1.7071	0.64061	-2.66481	0.00770327	0.0607108	12.622	7.71894	24.0672	19.2332	10.952	17.8345	12.622	12.8649	25.4043	58.574	64.8693	57.8416	87.261	26.4885	-0.112801	-1.83277	1.71997	MAK16	chr8:33347858:+	-
chr8:23425040-23425100:mpeak_77778|chr8_23386362_23428847_SLC25A37_NM_+|	66.7247	2.89701	0.538466	-5.38011	7.4441e-08	8.50318e-06	33.6587	21.8703	28.0784	5.24543	7.58213	8.67623	54.6954	87.4813	92.2576	121.519	148.273	191.359	35.6635	4.66307	1.95904	-0.976055	2.9351	SLC25A37	chr8:23425095:+	chr8_23567581_+
chr8:180000-180058:mpeak_77368|chr8_163710_182318_RPL23AP53_NR_-|	4.95643	4.6275	1.72544	-2.68193	0.00731985	0.05858	18.2318	5.14596	1.33707	2.62272	1.68492	4.33812	0	2.57298	0	1.74848	12.6369	9.15825	320.184	36.7223	1.51531	-3.19382	4.70914	RPL23AP53	chr8:179979:-;chr8:180006:-	chr8_230008_-
chr8:146217341-146217482:mpeak_80815|chr8_146203939_146228285_ZNF252P_NR_-|	62.4359	3.43555	0.921151	-3.72963	0.000191761	0.00468016	2.80489	15.4379	12.0336	0.874238	2.52738	0	109.391	147.946	101.617	122.393	137.321	96.8846	8.43461	1.43086	3.1539	0.00949824	3.1444	ZNF252P	chr8:146217344:-;chr8:146217425:-	chr8_144991959_-;chr8_144992040_-
chr8:146125232-146125294:mpeak_80800|chr8_146108221_146126846_ZNF250_NM_-|	6.24618	3.72161	1.43848	-2.58718	0.00967648	0.070998	14.0245	9.00543	8.0224	5.24543	10.1095	11.0863	0	1.28649	0	4.37119	5.05475	6.74818	804.574	163.479	0.23191	-3.65217	3.88409	ZNF250	chr8:146125234:-	chr8_144899853_-
chr8:146032458-146032534:mpeak_80782|chr8_146024260_146032575_ZNF517_NM_+|	4.59692	6.1098	1.73607	-3.51932	0.000432652	0.00844029	0	11.5784	8.0224	2.62272	1.68492	1.44604	0	0	1.33707	14.8621	5.89721	7.71221	732.978	20.2085	1.76836	-4.41237	6.18073	ZNF517	chr8:146032512:+	-
chr8:145978763-145978896:mpeak_80774|chr8_145948767_145980970_ZNF251_NM_-|	4.04605	3.35344	1.70382	-1.96819	0.0490462	0.214474	0	6.43245	4.0112	1.74848	8.42459	5.30214	0	0	1.33707	6.11967	5.05475	10.1223	390.543	72.6648	-0.567332	-3.99349	3.42615	ZNF251	chr8:145978764:-;chr8:145978839:-	chr8_144753457_-
chr8:145134107-145134313:mpeak_80686|chr8_145133521_145135144_EXOSC4_NM_+|	112.063	2.57982	0.554342	-4.65385	3.25794e-06	0.00019294	106.586	147.946	57.4939	35.8438	72.4514	41.4531	72.9271	81.0489	74.8757	158.237	271.272	224.618	136.344	22.8929	1.05913	-1.51516	2.57428	EXOSC4	chr8:145134162:+;chr8:145134256:+	chr8_144079258_+;chr8_144079374_+
chr8:143810597-143810724:mpeak_80539|chr8_143808620_143816743_THEM6_NM_+|	129.672	2.19762	0.56477	-3.89118	9.97577e-05	0.00288185	12.622	15.4379	10.6965	5.24543	5.05475	8.19422	120.61	212.271	124.347	313.852	368.154	359.582	8.47638	1.7756	1.06735	-1.1878	2.25514	THEM6	chr8:143810649:+;chr8:143810718:+	chr8_142729229_+;chr8_142729302_+
chr8:133845026-133845088:mpeak_80388|chr8_133787603_133858025_PHF20L1_NM_+|	17.743	3.07786	0.767866	-4.00833	6.11497e-05	0.00205678	9.81712	5.14596	5.34827	6.11967	2.52738	4.82013	7.01223	11.5784	8.0224	55.9513	55.6023	40.9711	76.321	8.82951	0.592839	-2.51884	3.11168	PHF20L1	chr8:133845082:+	chr8_132832833_+
chr8:133825381-133825446:mpeak_80385|chr8_133787603_133858025_PHF20L1_NM_+|	21.2233	2.81763	0.71201	-3.9573	7.58032e-05	0.00236272	9.81712	7.71894	24.0672	9.61662	15.1643	9.15825	7.01223	11.5784	8.0224	55.9513	55.6023	40.9711	156.327	22.2516	0.293747	-2.51884	2.81258	PHF20L1	chr8:133825435:+	chr8_132813188_+
chr8:124116389-124116447:mpeak_80074|chr8_124084919_124164045_TBC1D31_NM_+|	5.24608	5.21858	1.64869	-3.16529	0.00154931	0.0200082	9.81712	16.7244	2.67413	2.62272	2.52738	1.92805	0	2.57298	0	6.99391	15.1643	1.92805	378.493	29.3867	2.0453	-3.22669	5.27199	TBC1D31	chr8:124116441:+	chr8_123104207_+
chr8:124113141-124113309:mpeak_80071|chr8_124084919_124164045_TBC1D31_NM_+|	5.05415	3.89711	1.57473	-2.47478	0.0133319	0.0882159	7.01223	9.00543	5.34827	6.11967	1.68492	4.82013	0	2.57298	0	6.99391	15.1643	1.92805	276.799	52.4147	0.759061	-3.22669	3.98576	TBC1D31	chr8:124113330:+	chr8_123101023_+;chr8_123101100_+
chr8:124089609-124089727:mpeak_80070|chr8_124084919_124164045_TBC1D31_NM_+|	9.25269	4.85312	1.51627	-3.2007	0.00137095	0.0184223	15.4269	36.0217	13.3707	7.86815	2.52738	9.15825	0	2.57298	0	6.99391	15.1643	1.92805	839.743	81.1824	1.72898	-3.22669	4.95567	TBC1D31	chr8:124089720:+	chr8_123077479_+
chr8:109245592-109245769:mpeak_79831|chr8_109214152_109260959_EIF3E_NM_-|	342.001	1.39794	0.672383	-2.07908	0.0376099	0.180872	19.6342	24.4433	44.1232	3.49695	25.2738	15.4244	398.294	707.57	601.68	657.427	874.472	732.178	5.16536	1.95202	0.996904	-0.407	1.4039	EIF3E	chr8:109245593:-;chr8:109245623:-	chr8_108233394_-
chr8:107705288-107705401:mpeak_79806|chr8_107282405_107763033_OXR1_NM_+|	47.466	1.72487	0.629562	-2.7398	0.00614769	0.0517993	5.60978	15.4379	12.0336	6.99391	5.89721	2.89208	51.8905	70.757	88.2464	90.0465	103.622	116.165	15.6862	5.09408	1.06763	-0.554979	1.6226	OXR1	chr8:107705394:+	chr8_106693110_+;chr8_106693165_+
chr8:102631869-102631935:mpeak_79624|chr8_102504667_102678816_GRHL2_NM_+|	158.329	1.41978	0.500169	-2.83859	0.0045313	0.0418829	30.8538	25.7298	45.4603	62.9452	52.2324	51.0934	54.6954	105.492	144.403	403.024	477.674	446.344	33.502	12.5294	-0.704347	-2.12327	1.41892	GRHL2	chr8:102631953:+	-
chr8:100508041-100508191:mpeak_79493|chr8_100025493_100887645_VPS13B_NM_+|	50.8853	4.77433	1.04224	-4.58083	4.63143e-06	0.000259454	267.867	117.071	82.8981	34.0953	32.8559	37.115	5.60978	0	0	16.6105	5.89721	10.6043	2779.88	314.285	2.1685	-2.56134	4.72984	VPS13B	chr8:100508148:+;chr8:100508184:+	-
chr7:91862383-91862473:mpeak_75336|chr7_91830118_91875414_KRIT1_NM_-|	99.9352	2.41114	0.773919	-3.11549	0.00183637	0.0220977	4.20734	0	14.7077	2.62272	10.1095	5.78416	72.9271	61.7515	52.1456	257.026	395.956	321.985	15.1868	1.89918	0.0307345	-2.38367	2.4144	KRIT1	chr7:91862403:-	-
chr7:7760804-7760922:mpeak_73536|chr7_7680266_7916911_UMAD1_NM_+|	19.2546	2.30652	1.13302	-2.03572	0.0417781	0.194706	35.0611	15.4379	6.68533	3.49695	7.58213	2.89208	4.20734	55.3191	13.3707	21.856	36.2257	28.9208	78.4453	16.0583	2.03317	-0.255195	2.28836	UMAD1	chr7:7760862:+;chr7:7760932:+	chr7_7721230_+;chr7_7721300_+
chr7:75070412-75070468:mpeak_75027|chr7_75048176_75115565_POM121C_NM_-|	191.603	2.47825	0.429318	-5.77252	7.80931e-09	1.29494e-06	25.244	27.0163	38.7749	14.8621	16.8492	9.64026	169.696	241.86	216.605	486.077	561.92	490.689	14.4923	2.68745	1.13849	-1.29249	2.43098	POM121C	chr7:75070415:-	chr7_75441138_-;chr7_75441195_-
chr7:72304531-72304594:mpeak_74837|chr7_72299951_72307155_SBDSP1_NR_+|	85.968	1.45412	0.574373	-2.53166	0.0113524	0.0796077	14.0245	18.0109	25.4043	1.74848	5.05475	7.71221	144.452	196.833	207.245	165.231	133.108	112.791	10.4715	3.53061	1.98446	0.415975	1.56848	SBDSP1	chr7:72304586:+	chr7_72834005_+
chr7:64839278-64839333:mpeak_74680|chr7_64838711_64863253_ZNF92_NM_+|	8.45723	4.46446	1.41584	-3.15323	0.00161476	0.0205023	5.60978	0	4.0112	4.37119	5.89721	2.41006	0	0	2.67413	31.4726	21.9039	23.1366	179.89	16.5703	-0.398124	-4.83856	4.44044	ZNF92	chr7:64839338:+	chr7_65374420_+
chr7:64259832-64259884:mpeak_74648|chr7_64254765_64312176_ZNF138_NR_+mpeak_74648|chr7_64254765_64291828_ZNF138_NM_+||	5.61917	2.86945	1.28461	-2.23371	0.0255022	0.136999	4.20734	3.85947	16.0448	3.49695	1.68492	6.74818	0	5.14596	1.33707	6.11967	10.1095	8.67623	247.946	47.9015	1.01513	-1.94172	2.95685	ZNF138	chr7:64259883:+	chr7_64799526_+
chr7:63984949-63985087:mpeak_74631|chr7_63982878_64023505_ZNF680_NM_-|	19.8445	2.01672	0.728583	-2.76801	0.00563996	0.048862	5.60978	10.2919	13.3707	6.11967	11.7944	5.78416	8.41467	12.8649	22.7301	41.0892	58.1296	41.9351	66.5134	16.7889	0.304759	-1.68138	1.98614	ZNF680	chr7:63984957:-	-
chr7:5528741-5528865:mpeak_73371|chr7_5521562_5553399_FBXL18_NM_-|	124.855	2.4512	0.646163	-3.79347	0.000148559	0.00382517	8.41467	6.43245	4.0112	3.49695	5.89721	6.74818	70.1223	61.7515	117.662	385.539	410.277	417.905	7.55737	1.32999	0.224351	-2.28212	2.50647	FBXL18	chr7:5528742:-;chr7:5528808:-	chr7_5489178_-
chr7:51200358-51200414:mpeak_74479|chr7_51085265_51384515_COBL_NM_-|	47.713	1.51793	0.686507	-2.21109	0.0270296	0.143197	12.622	7.71894	6.68533	2.62272	0	4.33812	119.208	83.6219	89.5835	87.4238	72.4514	86.2803	9.2425	4.24173	1.95703	0.248438	1.70859	COBL	chr7:51200357:-	chr7_51132666_-
chr7:5029297-5029355:mpeak_73320|chr7_5013615_5036240_RNF216P1_NR_+|	20.8218	4.18689	1.09261	-3.83201	0.0001271	0.00341671	1.40245	18.0109	2.67413	5.24543	5.05475	3.8561	1.40245	10.2919	5.34827	55.9513	97.7252	42.8992	129.601	7.20145	0.641784	-3.52786	4.16965	RNF216P1	chr7:5029351:+	chr7_4989718_+
chr7:5028946-5029001:mpeak_73319|chr7_5013615_5036240_RNF216P1_NR_+|	21.2294	4.72374	1.09599	-4.31001	1.63246e-05	0.000704932	12.622	9.00543	6.68533	1.74848	10.1095	0.964026	1.40245	10.2919	5.34827	55.9513	97.7252	42.8992	166.129	6.52268	1.14283	-3.52786	4.6707	RNF216P1	chr7:5029003:+	chr7_4989368_+
chr7:4794612-4794688:mpeak_73302|chr7_4721929_4801814_FOXK1_NM_+|	90.7915	2.01833	0.753951	-2.677	0.00742839	0.0592767	1.40245	5.14596	9.35947	6.11967	5.05475	2.89208	47.6831	74.6164	118.999	261.397	299.915	256.913	6.59261	1.71915	0.177478	-1.76168	1.93916	FOXK1	chr7:4794689:+	chr7_4755053_+
chr7:42261207-42261281:mpeak_74221|chr7_42006239_42276618_GLI3_NM_-|	28.3471	2.87842	0.81502	-3.53171	0.000412875	0.00813135	63.11	32.1623	50.8085	19.2332	26.9587	18.7985	0	11.5784	18.7189	24.4787	26.1162	48.2013	321.438	65.7823	1.16847	-1.70526	2.87373	GLI3	chr7:42261215:-	chr7_42221618_-
chr7:23226722-23226866:mpeak_73783|chr7_23221445_23239786_NUPL2_NM_+|	6.32244	4.94498	1.53356	-3.2245	0.00126191	0.0174081	2.80489	9.00543	1.33707	5.24543	3.36983	5.30214	1.40245	0	0	15.7363	21.0615	10.6043	312.487	29.3604	-0.082114	-5.07893	4.99682	NUPL2	chr7:23226777:+;chr7:23226867:+	chr7_23187153_+;chr7_23187204_+;chr7_23187246_+
chr7:156757653-156757765:mpeak_77267|chr7_156742416_156762222_NOM1_NM_+|	33.8174	1.76019	0.635692	-2.76894	0.00562388	0.0487736	5.60978	6.43245	5.34827	9.61662	7.58213	6.26617	22.4391	24.4433	20.056	93.5435	112.889	91.5825	25.9798	7.87373	-0.432206	-2.15448	1.72227	NOM1	chr7:156757714:+	chr7_156965003_+;chr7_156965071_+
chr7:156755987-156756050:mpeak_77265|chr7_156742416_156762222_NOM1_NM_+|	39.889	3.57783	0.534526	-6.69347	2.17938e-11	6.45331e-09	19.6342	33.4488	30.7525	6.99391	8.42459	14.4604	22.4391	24.4433	20.056	93.5435	112.889	91.5825	125.243	10.026	1.48844	-2.15448	3.64292	NOM1	chr7:156756042:+	chr7_156963352_+
chr7:150828342-150828406:mpeak_77084|chr7_150782917_150840823_AGAP3_NM_+|	115.834	2.12538	0.616115	-3.44964	0.000561324	0.0101393	8.41467	19.2974	2.67413	11.3651	8.42459	7.23019	93.9638	74.6164	110.977	278.008	414.49	360.546	10.8694	2.56589	0.169393	-1.91335	2.08274	AGAP3	chr7:150828399:+	chr7_151131310_+
chr7:150820668-150820730:mpeak_77083|chr7_150782917_150840823_AGAP3_NM_+|	209.887	2.91155	0.335932	-8.66709	4.43313e-18	3.06292e-15	269.269	234.141	286.132	139.878	135.636	120.985	93.9638	74.6164	110.977	278.008	414.49	360.546	282.427	37.6527	0.9937	-1.91335	2.90705	AGAP3	chr7:150820725:+	chr7_151123591_+;chr7_151123638_+
chr7:150734590-150734685:mpeak_77071|chr7_150725508_150742295_ABCB8_NM_+|	20.0996	1.39164	0.653546	-2.12936	0.0332241	0.166744	28.0489	15.4379	41.4491	11.3651	16.0067	13.9784	15.4269	21.8703	13.3707	14.8621	21.9039	27.4747	167.632	64.3676	1.03848	-0.342416	1.3809	ABCB8	chr7:150734646:+;chr7:150734675:+;chr7:150734703:+	chr7_151037495_+;chr7_151037587_+
chr7:149183554-149183605:mpeak_77040|chr7_149172574_149194898_ZNF746_NM_-|	7.40316	5.82421	1.5154	-3.84334	0.000121372	0.0033321	2.80489	7.71894	0	4.37119	6.73967	4.82013	0	0	0	23.6044	18.5341	20.2445	#DIV/0!	25.5374	-0.598176	-Inf	Inf	ZNF746	chr7:149183553:-	chr7_149486463_-
chr7:132765680-132765743:mpeak_76576|chr7_132470421_132766828_CHCHD3_NM_-|	41.8512	2.09721	0.637568	-3.28939	0.00100405	0.0148919	32.2562	25.7298	26.7413	3.49695	12.6369	4.33812	44.8782	86.1949	66.8533	55.077	87.6157	56.3955	42.8075	10.2829	2.04918	-0.00844353	2.05762	CHCHD3	chr7:132765687:-	-
chr7:132657669-132657729:mpeak_76569|chr7_132470421_132766828_CHCHD3_NM_-|	35.9631	1.65504	0.831811	-1.98969	0.0466254	0.207611	5.60978	6.43245	13.3707	6.11967	2.52738	0.482013	44.8782	86.1949	66.8533	55.077	87.6157	56.3955	12.8396	4.58543	1.47702	-0.00844353	1.48547	CHCHD3	chr7:132657679:-	chr7_132972915_-
chr7:129274437-129274492:mpeak_76463|chr7_129251542_129394857_NRF1_NM_+mpeak_76463|chr7_129251542_129394857_NRF1_NM_+||	13.4263	3.60812	1.16863	-3.08747	0.0020187	0.0235409	1.40245	3.85947	1.33707	0.874238	5.05475	4.82013	2.80489	2.57298	1.33707	34.0953	58.1296	44.8272	98.2732	7.84309	-0.703903	-4.35121	3.6473	NRF1	chr7:129274493:+	chr7_129634651_+
chr7:128125840-128125898:mpeak_76383|chr7_128116782_128141815_METTL2B_NM_+|	35.0473	1.54004	0.756877	-2.03474	0.0418774	0.194731	4.20734	10.2919	0	6.11967	5.05475	5.78416	36.4636	16.7244	36.1008	106.657	97.7252	95.4386	24.3579	5.65624	-0.226036	-1.74755	1.52151	METTL2B	chr7:128125897:+	chr7_128485842_+
chr7:108136711-108136771:mpeak_76098|chr7_108113119_108168605_PNPLA8_NM_-|	26.6833	2.47694	1.03713	-2.38827	0.016928	0.103886	2.80489	25.7298	20.056	0	10.1095	2.41006	25.244	33.4488	49.4715	44.5862	51.39	54.9495	44.9231	12.4428	1.9565	-0.480614	2.43711	PNPLA8	chr7:108136712:-	-
chr7:105515533-105515593:mpeak_75974|chr7_105248340_105517031_ATXN7L1_NM_-|	7.80617	6.50374	1.41762	-4.5878	4.47951e-06	0.000252651	21.0367	11.5784	14.7077	3.49695	5.89721	9.15825	0	0	0	9.61662	10.952	7.23019	#DIV/0!	66.7382	1.35093	-Inf	Inf	ATXN7L1	chr7:105515541:-	chr7_105875096_-
chr7:100463103-100463172:mpeak_75721|chr7_100450340_100463340_SLC12A9_NM_+|	69.0781	1.60783	0.585791	-2.74471	0.00605647	0.0513438	14.0245	9.00543	13.3707	5.24543	8.42459	3.8561	122.013	127.363	72.2016	142.501	163.437	147.496	11.3194	3.8652	1.05445	-0.495728	1.55018	SLC12A9	chr7:100463171:+	chr7_100865565_+
chr6:99858449-99858527:mpeak_71352|chr6_99849506_99873207_PNISR_NM_-|	87.4859	2.16728	0.71773	-3.01963	0.00253086	0.0270754	2.80489	7.71894	2.67413	2.62272	5.89721	8.19422	32.2562	55.3191	58.8309	322.594	304.128	246.791	9.01462	1.91344	-0.340754	-2.57685	2.2361	PNISR	chr6:99858450:-	chr6_99410574_-
chr6:96970776-96970843:mpeak_71293|chr6_96969701_97001160_UFL1_NM_+|	37.8017	1.86579	0.586146	-3.18315	0.00145683	0.0191117	9.81712	11.5784	14.7077	6.11967	3.36983	4.33812	47.6831	60.4651	61.5051	65.5679	91.828	76.6401	21.2806	5.90833	1.38458	-0.464141	1.84872	UFL1	chr6:96970840:+	chr6_96522963_+
chr6:96600328-96600416:mpeak_71283|chr6_96463844_96651023_FUT9_NM_+|	19.9848	2.74407	0.702348	-3.90699	9.3453e-05	0.00275736	12.622	15.4379	10.6965	16.6105	11.7944	6.74818	12.622	6.43245	5.34827	43.7119	43.8078	53.9855	158.82	24.8423	0.140782	-2.53574	2.67652	FUT9	chr6:96600418:+	-
chr6:88305086-88305166:mpeak_71156|chr6_88299784_88376735_ORC3_NM_+|	25.3073	2.37231	0.83656	-2.83579	0.00457118	0.0421225	37.866	99.0598	40.112	10.4909	21.9039	13.4964	7.01223	21.8703	5.34827	14.8621	21.0615	10.6043	517.188	98.6317	1.94777	-0.442797	2.39057	ORC3	chr6:88305161:+	chr6_87595442_+
chr6:88139139-88139195:mpeak_71137|chr6_88117689_88173737_C6orf165_NM_+|	6.15432	3.45428	1.14668	-3.01242	0.00259175	0.0276198	5.60978	2.57298	12.0336	1.74848	3.36983	3.37409	0	5.14596	2.67413	13.1136	9.26704	14.9424	172.345	22.7538	1.25128	-2.25481	3.50609	C6orf165	chr6:88139193:+	chr6_87429473_+
chr6:56965250-56965373:mpeak_70664|chr6_56954807_57033220_ZNF451_NM_+|	19.1127	3.10378	0.840947	-3.69081	0.000223537	0.00526399	4.20734	15.4379	9.35947	1.74848	8.42459	2.41006	8.41467	16.7244	16.0448	37.5922	53.0749	55.9135	70.4273	8.58444	1.2048	-1.83154	3.03634	ZNF451	chr6:56965369:+	chr6_57100571_+
chr6:53787065-53787148:mpeak_70575|chr6_53659777_53787432_LRRC1_NM_+|	54.3357	1.86099	0.668483	-2.7839	0.00537103	0.0472731	4.20734	9.00543	13.3707	7.86815	5.05475	3.37409	46.2807	70.757	78.8869	102.286	160.067	150.87	13.5682	3.94387	0.705922	-1.07662	1.78254	LRRC1	chr6:53787143:+	chr6_53922345_+
chr6:52905931-52905992:mpeak_70539|chr6_52870101_52926600_ICK_NM_-|	63.1264	0.883189	0.381445	-2.31538	0.0205923	0.118316	96.7687	79.7624	106.965	49.8316	47.1777	52.0574	68.7198	51.4596	44.1232	54.2028	60.657	45.7912	172.545	92.7891	0.927373	0.0324254	0.894948	ICK	chr6:52905934:-	-
chr6:33178790-33178844:mpeak_69807|chr6_33176285_33180074_RING1_NM_+|	99.0957	2.57767	0.67868	-3.79806	0.000145834	0.00377847	5.60978	18.0109	8.0224	0.874238	3.36983	4.33812	186.525	129.936	104.291	254.403	230.834	242.935	7.52059	1.17859	1.88247	-0.791308	2.67378	RING1	chr6:33178842:+	chr6_33211064_+
chr6:3082044-3082234:mpeak_68554|chr6_3077057_3113286_RIPK1_NM_+|	20.4306	2.37521	0.846912	-2.80455	0.00503862	0.0449563	0	12.8649	8.0224	4.37119	11.7944	5.78416	7.01223	10.2919	14.7077	55.077	63.1844	52.0574	97.8729	12.8875	-0.0715793	-2.41156	2.33998	RIPK1	chr6:3082139:+	-
chr6:29597209-29597269:mpeak_69443|chr6_29571493_29600962_GABBR1_NM_-|	11.2331	2.37165	1.14697	-2.06776	0.0386627	0.184469	28.0489	6.43245	1.33707	5.24543	1.68492	1.44604	19.6342	14.1514	8.0224	17.4848	16.8492	14.4604	85.6736	17.1667	2.0963	-0.222933	2.31924	GABBR1	chr6:29597211:-	chr6_29629442_-
chr6:28196919-28197037:mpeak_69378|chr6_28193028_28200339_ZSCAN9_NM_+|	14.0545	4.75304	1.45156	-3.27443	0.00105874	0.0154543	4.20734	11.5784	4.0112	6.11967	17.6916	25.5467	1.40245	0	0	32.3468	35.3833	30.3668	470.534	50.3155	-1.31801	-6.12819	4.81019	ZSCAN9	chr6:28196972:+;chr6:28197034:+	chr6_28229210_+;chr6_28229255_+
chr6:17834213-17834310:mpeak_68963|chr6_17761108_17987854_KIF13A_NM_-|	70.0726	1.56713	0.536257	-2.92235	0.00347405	0.0341677	19.6342	18.0109	9.35947	24.4787	10.1095	16.8705	44.8782	60.4651	69.5275	201.949	205.56	160.028	26.8796	9.067	-0.130612	-1.69843	1.56781	KIF13A	chr6:17834191:-	chr6_17834061_-
chr6:170890733-170890936:mpeak_73089|chr6_170886805_170893780_PDCD2_NM_-|	202.709	1.05498	0.333361	-3.16467	0.0015526	0.0200196	88.354	123.503	100.28	53.3285	48.0201	68.9279	280.489	343.493	284.795	347.947	385.846	307.524	34.3469	16.352	0.8743	-0.196411	1.07071	PDCD2	chr6:170890835:-	chr6_170581748_-;chr6_170581781_-
chr6:160172144-160172300:mpeak_72888|chr6_160148029_160176059_WTAP_NM_+|	40.4102	2.82723	0.727299	-3.8873	0.000101364	0.00291808	2.80489	14.1514	20.056	2.62272	5.05475	5.30214	28.0489	36.0217	58.8309	90.9208	107.835	113.273	30.1154	4.15975	1.51176	-1.34417	2.85593	WTAP	chr6:160172198:+;chr6:160172304:+	chr6_159751162_+;chr6_159751269_+
chr6:159034169-159034334:mpeak_72845|chr6_158957467_159052841_TMEM181_NM_+|	56.9213	2.84436	0.76641	-3.71128	0.000206216	0.00497017	8.41467	5.14596	16.0448	4.37119	4.21229	0	89.7565	84.9084	57.4939	131.136	129.739	151.834	12.7522	3.11969	1.78623	-0.830011	2.61624	TMEM181	chr6:159034252:+;chr6:159034332:+	chr6_158613206_+;chr6_158613302_+;chr6_158613339_+
chr6:147526681-147526910:mpeak_72397|chr6_147525493_147705849_STXBP5_NM_+|	40.0275	2.24156	0.594589	-3.76993	0.000163291	0.00412758	5.60978	23.1568	12.0336	7.86815	6.73967	9.64026	30.8538	43.7407	33.4267	96.1662	117.102	93.9925	37.7706	7.8917	0.750706	-1.50815	2.25886	STXBP5	chr6:147526753:+;chr6:147526783:+;chr6:147526864:+;chr6:147526911:+	chr6_147205632_+;chr6_147205726_+;chr6_147205774_+
chr6:13620570-13620728:mpeak_68849|chr6_13615558_13620985_NOL7_NM_+|	226.57	0.701897	0.335485	-2.09219	0.0364218	0.177158	54.6954	48.8866	41.4491	49.8316	56.4447	44.3452	260.855	319.05	324.907	434.496	515.585	568.293	16.0289	9.91992	-0.0545658	-0.746838	0.692272	NOL7	chr6:13620718:+	chr6_13620448_+
chr6:126110025-126110087:mpeak_71914|chr6_126102306_126249781_NCOA7_NM_+|	9.14132	4.2972	1.13771	-3.77707	0.000158683	0.0040357	9.81712	18.0109	6.68533	0	1.68492	0.482013	14.0245	11.5784	8.0224	10.4909	16.8492	12.0503	102.641	8.25175	3.99343	-0.228297	4.22173	NCOA7	chr6:126110077:+	chr6_125788929_+
chr6:111726633-111726741:mpeak_71693|chr6_111621359_111804918_REV3L_NM_-|	26.9451	2.24402	0.826275	-2.71582	0.00661112	0.0547033	4.20734	1.28649	5.34827	6.11967	1.68492	3.8561	9.81712	23.1568	16.0448	74.3103	89.3006	88.2084	22.1183	4.63058	-0.10501	-2.36098	2.25597	REV3L	chr6:111726617:-	-
chr6:101306892-101307092:mpeak_71416|chr6_100957409_101329248_ASCC3_NM_-|	14.9333	1.92544	0.861988	-2.23372	0.0255018	0.136999	11.2196	9.00543	2.67413	3.49695	0.842459	2.89208	12.622	20.5838	33.4267	28.8499	29.4861	24.1006	34.3663	8.77219	1.66293	-0.307058	1.96999	ASCC3	chr6:101306885:-	chr6_100858988_-
chr5:86683183-86683239:mpeak_65677|chr5_86564069_86686616_RASA1_NM_+|	10.0077	3.6848	1.27053	-2.9002	0.0037292	0.0361201	5.60978	9.00543	0	3.49695	0.842459	5.78416	0	6.43245	2.67413	24.4787	39.5956	22.1726	160.491	11.7379	0.529753	-3.24349	3.77324	RASA1	chr5:86683237:+	-
chr5:76327083-76327218:mpeak_65374|chr5_76326209_76358876_AGGF1_NM_+|	72.6382	1.92573	0.562598	-3.42293	0.00061951	0.0107455	8.41467	12.8649	14.7077	9.61662	13.4793	5.78416	85.5492	55.3191	65.5163	174.848	237.573	187.985	17.437	4.8101	0.317412	-1.5406	1.85802	AGGF1	chr5:76327142:+	chr5_77031281_+;chr5_77031313_+
chr5:74982768-74982924:mpeak_65361|chr5_74970403_75013313_POC5_NM_-|	7.98094	2.74163	1.05931	-2.58814	0.00964963	0.0708973	14.0245	5.14596	18.7189	4.37119	8.42459	3.8561	0	3.85947	6.68533	6.11967	13.4793	11.0863	239.545	54.2666	1.18611	-1.54102	2.72712	POC5	chr5:74982773:-	chr5_75686949_-
chr5:6660790-6660844:mpeak_63896|chr5_6633499_6668314_SRD5A1_NM_+|	71.7089	2.5013	0.964564	-2.59319	0.00950898	0.0703919	2.80489	14.1514	12.0336	1.74848	0	0.964026	119.208	243.147	180.504	76.0587	118.787	91.1004	5.34023	1.42291	3.41785	0.924834	2.49302	SRD5A1	chr5:6660846:+	-
chr5:66226731-66226793:mpeak_64990|chr5_65892175_66458974_MAST4_NM_+|	53.8486	3.29891	0.536297	-6.15128	7.68603e-10	1.59312e-07	47.6831	65.611	68.1904	20.9817	32.8559	31.8129	15.4269	14.1514	37.4379	87.4238	103.622	120.985	270.807	27.4493	1.08331	-2.21911	3.30242	MAST4	chr5:66226789:+	chr5_66930961_+
chr5:66085993-66086049:mpeak_64988|chr5_65892175_66458974_MAST4_NM_+|	33.2683	2.29564	0.990089	-2.31862	0.0204155	0.117865	0	10.2919	0	3.49695	2.52738	3.8561	15.4269	14.1514	37.4379	87.4238	103.622	120.985	46.0721	3.16649	0.0588665	-2.21911	2.27798	MAST4	chr5:66086048:+	-
chr5:64145707-64145764:mpeak_64893|chr5_64064744_64313985_CWC27_NM_+|	79.629	3.25331	1.0637	-3.0585	0.00222447	0.0247286	0	10.2919	10.6965	0.874238	0	0.964026	112.196	200.693	176.493	119.771	176.074	147.496	6.43317	0.621959	3.51318	0.142543	3.37064	CWC27	chr5:64145766:+	-
chr5:60368937-60369051:mpeak_64820|chr5_60240955_60448530_NDUFAF2_NM_+|	82.8201	1.26353	0.455714	-2.77265	0.0055602	0.0483731	88.354	39.8812	74.8757	27.9756	18.5341	21.6906	115.001	162.098	123.01	102.286	114.574	105.561	50.764	21.1526	1.57442	0.311445	1.26297	NDUFAF2	chr5:60369042:+	chr5_61073127_+;chr5_61073141_+;chr5_61073172_+
chr5:41904833-41904969:mpeak_64499|chr5_41904469_41917117_C5orf51_NM_+|	36.3888	3.74306	0.91015	-4.11257	3.91276e-05	0.0014679	4.20734	9.00543	13.3707	2.62272	2.52738	0.482013	56.0978	32.1623	26.7413	143.375	76.6637	69.4099	23.1157	1.9458	2.23878	-1.33166	3.57044	C5orf51	chr5:41904890:+;chr5:41904917:+	chr5_41904812_+;chr5_41904869_+
chr5:179018639-179018750:mpeak_68296|chr5_178977561_179036376_RUFY1_NM_+|	66.5693	1.47005	0.740008	-1.98654	0.0469737	0.20849	32.2562	5.14596	42.7861	20.1075	9.26704	12.0503	88.354	72.0435	118.999	111.903	122.999	162.92	28.7006	10.4129	0.952896	-0.509809	1.4627	RUFY1	chr5:179018743:+	-
chr5:176863580-176863692:mpeak_68165|chr5_176853686_176868735_GRK6_NM_+|	104.082	0.872494	0.39404	-2.21423	0.0268132	0.142258	64.5125	77.1894	42.7861	23.6044	26.1162	28.9208	211.769	194.26	145.74	150.369	148.273	135.446	33.4357	18.1165	1.23017	0.34608	0.884085	GRK6	chr5:176863686:+	chr5_177436615_+;chr5_177436636_+;chr5_177436681_+
chr5:1628802-1628912:mpeak_63839|chr5_1599942_1634120_LOC728613_NR_-|	48.0682	4.1795	1.32909	-3.14465	0.00166288	0.0208577	103.781	172.39	100.28	41.9634	76.6637	67.4818	0	0	1.33707	4.37119	4.21229	4.33812	9384.99	1440.29	1.01631	-3.27264	4.28895	LOC728613	chr5:1628813:-	chr5_1628699_-;chr5_1628776_-
chr5:153736972-153737026:mpeak_67638|chr5_153570294_153796373_GALNT10_NM_+|	96.7845	2.47243	0.654739	-3.7762	0.000159238	0.00403743	16.8293	6.43245	5.34827	2.62272	4.21229	1.92805	172.501	131.222	124.347	209.817	251.895	234.258	6.6835	1.25911	1.70702	-0.70118	2.4082	GALNT10	chr5:153737028:+	-
chr5:153712939-153712999:mpeak_67635|chr5_153570294_153796373_GALNT10_NM_+|	98.645	2.1096	0.547875	-3.85052	0.000117868	0.00325748	14.0245	21.8703	8.0224	3.49695	5.05475	7.23019	172.501	131.222	124.347	209.817	251.895	234.258	10.2593	2.26761	1.47651	-0.70118	2.17769	GALNT10	chr5:153712990:+	-
chr5:153601940-153602000:mpeak_67631|chr5_153570294_153796373_GALNT10_NM_+|	96.9481	1.65704	0.625063	-2.65099	0.00802558	0.0627737	7.01223	2.57298	16.0448	6.11967	4.21229	3.37409	172.501	131.222	124.347	209.817	251.895	234.258	5.98734	1.96934	0.903021	-0.70118	1.6042	GALNT10	chr5:153601993:+	chr5_154222436_+
chr5:131051277-131051358:mpeak_66611|chr5_130980456_131132756_FNIP1_NM_-|	30.4446	6.28337	1.17959	-5.32674	9.99915e-08	1.06986e-05	0	20.5838	2.67413	0.874238	2.52738	2.41006	8.41467	3.85947	4.0112	98.7889	137.321	83.8703	214.223	1.81626	2.0007	-4.29634	6.29703	FNIP1	chr5:131051282:-	chr5_131715588_-
chr4:95986958-95987029:mpeak_61950|chr4_95679127_96075698_BMPR1B_NM_+|	108.962	3.30528	0.656382	-5.03561	4.76337e-07	4.11387e-05	5.60978	23.1568	26.7413	3.49695	5.89721	6.74818	70.1223	131.222	112.314	261.397	290.648	370.186	17.697	1.75036	1.78184	-1.55594	3.33778	BMPR1B	chr4:95987029:+	chr4_95065874_+
chr4:95682317-95682369:mpeak_61941|chr4_95679127_96075698_BMPR1B_NM_+|	106.136	3.00688	0.72326	-4.15739	3.219e-05	0.00126487	4.20734	18.0109	5.34827	1.74848	5.05475	3.37409	70.1223	131.222	112.314	261.397	290.648	370.186	8.78871	1.10355	1.43756	-1.55594	2.99349	BMPR1B	chr4:95682368:+	chr4_94761216_+
chr4:7050722-7050806:mpeak_60284|chr4_7045155_7055788_TADA2B_NM_+|	41.8251	2.23328	0.581582	-3.84	0.000123033	0.00335547	18.2318	24.4433	16.0448	7.86815	23.5888	10.1223	35.0611	23.1568	36.1008	99.6632	101.095	106.525	62.2569	13.5313	0.497986	-1.70395	2.20194	TADA2B	chr4:7050801:+	chr4_7049073_+
chr4:40936204-40936257:mpeak_60904|chr4_40818276_41216635_APBB2_NM_-|	102.145	1.57906	0.619638	-2.54836	0.0108231	0.0767794	8.41467	14.1514	5.34827	2.62272	12.6369	7.23019	136.037	91.3408	118.999	310.355	224.094	294.51	8.05895	2.71302	0.311736	-1.25896	1.57069	APBB2	chr4:40936203:-	chr4_40934189_-
chr4:40870974-40871114:mpeak_60897|chr4_40818276_41216635_APBB2_NM_-|	102.468	1.88533	0.59673	-3.15944	0.00158072	0.0202875	11.2196	14.1514	6.68533	8.74238	10.1095	3.37409	136.037	91.3408	118.999	310.355	224.094	294.51	9.25474	2.68119	0.528361	-1.25896	1.78732	APBB2	chr4:40870980:-	chr4_40868964_-
chr4:2008628-2008688:mpeak_60051|chr4_1985230_2010962_NELFA_NM_-|	120.049	3.35663	0.785166	-4.27506	1.91088e-05	0.000812465	21.0367	16.7244	10.6965	6.11967	10.952	7.71221	18.2318	92.6273	108.302	305.109	447.346	395.733	22.1104	2.15852	0.967323	-2.38929	3.35661	NELFA	chr4:2008637:-	chr4_2006911_-;chr4_2006928_-
chr4:184918043-184918099:mpeak_63592|chr4_184826508_184938241_STOX2_NM_+|	4.52579	3.25853	1.42852	-2.28105	0.0225453	0.125805	1.40245	11.5784	13.3707	2.62272	3.36983	1.92805	1.40245	1.28649	2.67413	6.11967	0.842459	7.71221	491.352	53.9759	1.7342	-1.45216	3.18637	STOX2	chr4:184918095:+	-
chr4:148787885-148788063:mpeak_63030|chr4_148653452_148993143_ARHGAP10_NM_+|	28.7202	2.48617	0.648867	-3.83155	0.000127339	0.00341671	35.0611	18.0109	24.0672	11.3651	10.1095	10.1223	8.41467	30.8758	32.0896	44.5862	64.0269	55.9135	108.068	19.2047	1.28768	-1.20473	2.49241	ARHGAP10	chr4:148788065:+	-
chr4:147435047-147435107:mpeak_63007|chr4_147177672_147443123_SLC10A7_NM_-|	8.92497	3.69296	1.16006	-3.18342	0.00145547	0.0191117	8.41467	1.28649	8.0224	0.874238	9.26704	3.8561	2.80489	1.28649	2.67413	22.7302	22.7464	23.1366	261.969	20.4004	0.340511	-3.34221	3.68273	SLC10A7	chr4:147435049:-	chr4_146513899_-
chr4:143347501-143347689:mpeak_62910|chr4_142950067_143767604_INPP4B_NM_-|	59.6876	1.60949	0.45956	-3.50224	0.00046136	0.00875317	53.2929	43.7407	70.8645	21.856	28.6436	41.9351	56.0978	43.7407	68.1904	99.6632	95.1978	93.0285	99.9222	32.1077	0.86108	-0.776806	1.63789	INPP4B	chr4:143347634:-	chr4_142426483_-
chr4:142143679-142143749:mpeak_62870|chr4_142142040_142154868_ZNF330_NM_+|	82.5141	1.51915	0.611224	-2.48543	0.0129394	0.0867267	16.8293	43.7407	17.3819	6.11967	9.26704	20.2445	131.83	115.784	123.01	156.489	180.286	169.187	21.0326	7.04229	1.12944	-0.44907	1.57851	ZNF330	chr4:142143735:+	chr4_141222548_+;chr4_141222580_+
chr4:123156103-123156191:mpeak_62574|chr4_123091757_123283185_KIAA1109_NM_+|	36.6972	2.38345	1.20712	-1.9745	0.0483253	0.212444	7.01223	9.00543	2.67413	7.86815	5.89721	0	5.60978	51.4596	30.7525	84.8011	139.848	95.4386	21.2837	6.45074	0.441363	-1.86581	2.30718	KIAA1109	chr4:123156207:+	chr4_122235047_+
chr4:113306936-113307068:mpeak_62413|chr4_113218498_113362358_ALPK1_NM_+|	7.31258	4.94924	1.34947	-3.66754	0.000244892	0.00557802	0	9.00543	10.6965	0.874238	0.842459	1.44604	0	5.14596	5.34827	12.2393	18.5341	23.6186	187.741	5.8147	2.63909	-2.3738	5.01289	ALPK1	chr4:113307071:+	chr4_112385833_+
chr3:9423893-9423972:mpeak_54356|chr3_9404716_9426207_THUMPD3_NM_+|	57.8343	2.09521	0.776815	-2.69718	0.00699297	0.0569536	11.2196	15.4379	41.4491	5.24543	10.952	26.9927	44.8782	64.3245	44.1232	133.758	162.595	133.036	44.4194	10.0585	0.657092	-1.48568	2.14277	THUMPD3	chr3:9423960:+	chr3_9382274_+
chr3:63901115-63901248:mpeak_56200|chr3_63850232_63985125_ATXN7_NM_+|	71.6936	3.32219	0.564479	-5.8854	3.97094e-09	7.31623e-07	14.0245	30.8758	30.7525	16.6105	11.7944	12.0503	22.4391	41.1677	54.8197	192.332	186.183	247.273	63.8816	6.46469	0.903065	-2.40168	3.30475	ATXN7	chr3:63901196:+	chr3_63915516_+
chr3:63891459-63891587:mpeak_56193|chr3_63850232_63985125_ATXN7_NM_+|	65.646	1.85263	0.811828	-2.28204	0.0224867	0.125716	2.80489	0	14.7077	10.4909	9.26704	6.26617	22.4391	41.1677	54.8197	192.332	186.183	247.273	22.1816	4.15861	-0.571451	-2.40168	1.83023	ATXN7	chr3:63891556:+	-
chr3:63890700-63890852:mpeak_56192|chr3_63850232_63985125_ATXN7_NM_+|	68.0536	2.73413	0.566122	-4.82959	1.36817e-06	9.6131e-05	11.2196	14.1514	14.7077	12.2393	10.952	9.15825	22.4391	41.1677	54.8197	192.332	186.183	247.273	33.8427	5.16941	0.30909	-2.40168	2.71077	ATXN7	chr3:63890770:+	chr3_63905089_+
chr3:63889591-63889661:mpeak_56190|chr3_63850232_63985125_ATXN7_NM_+|	64.1894	3.00838	0.90786	-3.31371	0.000920666	0.0141344	0	14.1514	1.33707	2.62272	5.05475	2.89208	22.4391	41.1677	54.8197	192.332	186.183	247.273	19.6178	1.689	0.551281	-2.40168	2.95296	ATXN7	chr3:63889649:+	chr3_63903972_+
chr3:56716071-56716136:mpeak_56031|chr3_56657871_56717135_FAM208A_NM_-|	59.274	2.40511	0.451618	-5.32555	1.0065e-07	1.06986e-05	22.4391	42.4542	32.0896	21.856	20.219	13.9784	37.866	50.1731	52.1456	136.381	135.636	146.05	69.1822	13.4077	0.79093	-1.5764	2.36733	FAM208A	chr3:56716075:-	chr3_56682050_-
chr3:5023242-5023299:mpeak_54299|chr3_5021096_5024520_BHLHE40_NM_+|	20.7786	4.35444	0.977157	-4.45623	8.34121e-06	0.000421689	7.01223	2.57298	6.68533	2.62272	4.21229	6.26617	0	1.28649	10.6965	70.8133	61.4995	75.676	90.5199	6.29898	0.312566	-4.11744	4.43001	BHLHE40	chr3:5023298:+	chr3_4981629_+
chr3:47328780-47328954:mpeak_55588|chr3_47324329_47385044_KLHL18_NM_+|	40.3431	2.42773	0.595328	-4.07797	4.54308e-05	0.00167407	71.5247	77.1894	66.8533	26.2272	48.0201	26.5107	18.2318	24.4433	5.34827	41.9634	32.0134	45.7912	448.88	84.1276	1.09725	-1.31844	2.41568	KLHL18	chr3:47328833:+;chr3:47328879:+;chr3:47328947:+	chr3_47287406_+;chr3_47287457_+
chr3:44401147-44401314:mpeak_55452|chr3_44379610_44448933_TCAIM_NM_+|	70.1505	2.46183	0.760964	-3.23515	0.00121579	0.0171339	207.562	191.687	183.178	62.0709	79.1911	92.0645	1.40245	2.57298	4.0112	3.49695	9.26704	5.30214	7292.53	1291.51	1.31973	-1.17763	2.49736	TCAIM	chr3:44401292:+;chr3:44401327:+	chr3_44359811_+
chr3:37317612-37318034:mpeak_55207|chr3_37284681_37407570_GOLGA4_NM_+|	549.629	0.990771	0.482186	-2.05475	0.0399032	0.188727	1461.35	1110.24	1096.39	883.855	768.322	977.04	23.8416	64.3245	34.7637	39.3407	72.4514	63.6257	2983.8	1498.83	0.480354	-0.512961	0.993315	GOLGA4	chr3:37317656:+	chr3_37276391_+
chr3:37214280-37214427:mpeak_55201|chr3_37095452_37217851_LRRFIP2_NM_-|	56.9514	2.51323	0.574904	-4.37156	1.23362e-05	0.000561977	28.0489	30.8758	18.7189	7.86815	5.05475	4.33812	54.6954	115.784	93.5947	114.525	98.5677	111.345	29.4022	5.32028	2.16935	-0.296999	2.46635	LRRFIP2	chr3:37214282:-;chr3:37214355:-	chr3_37172796_-;chr3_37172886_-
chr3:3213831-3213990:mpeak_54277|chr3_3192729_3221401_CRBN_NM_-|	100.642	2.06223	0.487934	-4.22647	2.37391e-05	0.000984104	54.6954	115.784	77.5499	40.215	42.9654	60.7336	67.3174	106.779	62.8421	173.973	227.464	177.381	104.681	24.8634	0.785304	-1.2886	2.0739	CRBN	chr3:3213838:-;chr3:3213871:-;chr3:3213939:-	chr3_3172165_-
chr3:31863617-31863674:mpeak_55030|chr3_31703608_32023342_OSBPL10_NM_-|	44.6265	1.43173	0.520785	-2.74917	0.00597468	0.0508062	21.0367	34.7352	32.0896	13.1136	9.26704	9.64026	70.1223	93.9138	46.7973	62.9452	75.8213	66.0358	41.6734	15.635	1.45622	0.0418721	1.41435	OSBPL10	chr3:31863620:-	chr3_31822129_-
chr3:3172273-3172365:mpeak_54259|chr3_3168599_3189589_TRNT1_NM_+|	74.2345	1.32119	0.516343	-2.55875	0.0105049	0.0753428	18.2318	48.8866	34.7637	16.6105	26.1162	23.1366	67.3174	84.9084	124.347	143.375	147.43	155.69	36.8374	14.7512	0.629353	-0.690986	1.32034	TRNT1	chr3:3172351:+	-
chr3:25818331-25818385:mpeak_54951|chr3_25761126_25831530_NGLY1_NM_-|	13.6199	3.28603	0.992151	-3.31202	0.000926236	0.0141426	8.41467	2.57298	9.35947	1.74848	4.21229	0.482013	4.20734	15.4379	16.0448	34.9695	37.0682	28.9208	57.0107	6.38162	1.65907	-1.50017	3.15924	NGLY1	chr3:25818333:-	chr3_25776844_-
chr3:23942245-23942386:mpeak_54882|chr3_23934828_23958537_NKIRAS1_NM_-|	30.2756	1.55937	0.667184	-2.33724	0.0194269	0.11399	30.8538	19.2974	32.0896	42.8377	16.0067	33.2589	11.2196	24.4433	8.0224	51.5801	42.1229	51.5754	188.257	63.3978	-0.163399	-1.7336	1.5702	NKIRAS1	chr3:23942244:-	-
chr3:197243238-197243288:mpeak_59767|chr3_197239235_197300194_BDH1_NM_-|	67.0921	2.18231	0.771925	-2.82711	0.00469709	0.0429841	7.01223	7.71894	5.34827	1.74848	2.52738	0.964026	107.988	123.503	141.729	104.909	160.91	140.748	5.38005	1.28881	1.93811	-0.123461	2.06157	BDH1	chr3:197243237:-	chr3_197516367_-
chr3:195966418-195966624:mpeak_59623|chr3_195965765_196014584_PCYT1A_NM_-|	106.078	2.02967	0.626747	-3.23841	0.00120197	0.0169771	301.526	171.103	231.313	180.093	187.868	142.676	1.40245	7.71894	5.34827	14.8621	16.0067	13.0143	4864.95	1163.63	0.463157	-1.60064	2.06379	PCYT1A	chr3:195966418:-	-
chr3:194305195-194305466:mpeak_59509|chr3_194304996_194310583_TMEM44-AS1_NR_+|	7.0414	3.70618	1.7967	-2.06278	0.039134	0.186043	37.866	14.1514	0	3.49695	5.05475	9.15825	0	2.57298	0	4.37119	5.89721	1.92805	1010.84	145.206	1.55443	-2.24495	3.79938	TMEM44-AS1	chr3:194305223:+;chr3:194305251:+;chr3:194305336:+;chr3:194305494:+	chr3_194584466_+;chr3_194584522_+;chr3_194584709_+
chr3:169861452-169861588:mpeak_58846|chr3_169815172_169899537_PHC3_NM_-|	118.152	1.97932	0.485053	-4.08063	4.49143e-05	0.00166243	22.4391	27.0163	46.7973	12.2393	16.0067	14.9424	103.781	173.676	183.178	277.134	255.265	285.352	20.8957	5.28137	1.15618	-0.828035	1.98422	PHC3	chr3:169861475:-	-
chr3:169201259-169201803:mpeak_58778|chr3_168802831_169381563_MECOM_NM_-|	3099.15	2.46728	0.585456	-4.21428	2.50573e-05	0.00101342	10906.8	7403.75	7103.84	4425.39	3759.89	3527.37	2.80489	5.14596	9.35947	19.2332	15.1643	11.0863	146816	25751.3	1.11758	-1.39372	2.5113	MECOM	chr3:169201402:-;chr3:169201586:-	chr3_169483809_-
chr3:141131966-141132029:mpeak_58030|chr3_141043054_141161230_ZBTB38_NM_+|	45.6532	1.80159	0.683111	-2.63733	0.00835624	0.064448	11.2196	11.5784	6.68533	6.11967	0.842459	2.41006	109.391	68.184	69.5275	96.1662	77.5062	88.2084	11.9316	3.5788	1.65344	-0.0838024	1.73724	ZBTB38	chr3:141132022:+	chr3_141413179_+
chr3:140955171-140955338:mpeak_58021|chr3_140950666_141011109_PXYLP1_NM_+|	18.0304	2.23529	0.77417	-2.88733	0.00388521	0.0372397	16.8293	42.4542	8.0224	8.74238	10.952	9.15825	8.41467	16.7244	14.7077	27.9756	27.8011	24.5827	168.912	35.9044	1.22203	-1.012	2.23404	PXYLP1	chr3:140955231:+;chr3:140955334:+	chr3_141236385_+;chr3_141236490_+
chr3:13532068-13532132:mpeak_54603|chr3_13521714_13545967_HDAC11_NM_+|	33.8079	2.30958	1.02238	-2.25902	0.0238822	0.130698	2.80489	7.71894	9.35947	1.74848	5.05475	0	84.1467	43.7407	24.0672	55.077	80.876	91.1004	13.085	4.49447	1.54727	-0.579392	2.12666	HDAC11	chr3:13532069:+;chr3:13532120:+	chr3_13490629_+
chr3:13004465-13004534:mpeak_54592|chr3_12942850_13114617_IQSEC1_NM_-|	93.6016	2.60246	0.557005	-4.67224	2.97929e-06	0.000180915	14.0245	21.8703	20.056	9.61662	5.89721	6.74818	124.818	61.7515	123.01	264.894	216.512	254.021	18.0732	3.02709	1.32957	-1.24827	2.57785	IQSEC1	chr3:13004478:-	chr3_12962984_-
chr3:11358129-11358264:mpeak_54526|chr3_11314009_11596284_ATG7_NM_+|	31.3434	1.52151	0.632825	-2.40432	0.0162026	0.100853	8.41467	12.8649	8.0224	5.24543	4.21229	3.37409	58.9027	36.0217	56.1568	56.8255	68.2391	57.8416	19.3948	7.01552	1.19127	-0.275779	1.46705	ATG7	chr3:11358185:+	-
chr22:50248142-50248266:mpeak_54177|chr22_50247496_50276981_ZBED4_NM_+|	39.61	2.7178	0.792451	-3.42961	0.000604445	0.01064	5.60978	6.43245	10.6965	6.11967	7.58213	2.89208	18.2318	46.3137	13.3707	98.7889	127.211	132.072	29.1837	4.63423	0.454503	-2.20026	2.65476	ZBED4	chr22:50248200:+	chr22_49854550_+
chr22:46892828-46892886:mpeak_54143|chr22_46759084_46933067_CELSR1_NM_-|	12.7423	3.08204	0.896124	-3.4393	0.000583215	0.0103852	25.244	24.4433	9.35947	5.24543	11.7944	13.0143	1.40245	6.43245	4.0112	14.8621	13.4793	23.6186	498.449	57.841	0.974292	-2.13299	3.10728	CELSR1	chr22:46892833:-	chr22_46496937_-;chr22_46496973_-
chr22:46722622-46722675:mpeak_54132|chr22_46692637_46725943_GTSE1_NM_+|	46.2397	2.14551	0.864922	-2.48059	0.0131166	0.0874897	14.0245	1.28649	6.68533	0.874238	5.89721	0.482013	74.3296	60.4651	90.9205	109.28	98.5677	92.0645	9.74515	2.41853	1.60052	-0.410035	2.01055	GTSE1	chr22:46722672:+	chr22_46326775_+
chr22:31736657-31736718:mpeak_53480|chr22_31723295_31742249_PATZ1_NM_-|	106.076	1.87212	0.429199	-4.3619	1.28937e-05	0.000574741	39.2685	42.4542	26.7413	126.765	155.012	128.697	15.4269	21.8703	13.3707	209.817	261.162	232.33	214.068	58.3633	-1.92008	-3.79502	1.87494	PATZ1	chr22:31736665:-	chr22_31340681_-;chr22_31340711_-;chr22_31340733_-
chr22:20094116-20094229:mpeak_52989|chr22_20067754_20097547_DGCR8_NM_+|	17.554	1.63858	0.707905	-2.31469	0.0206299	0.118368	9.81712	5.14596	10.6965	6.11967	4.21229	5.30214	25.244	12.8649	20.056	34.9695	46.3352	29.8848	44.1153	14.0608	0.714803	-0.9348	1.6496	DGCR8	chr22:20094226:+	-
chr22:19992538-19992691:mpeak_52982|chr22_19958266_20004309_ARVCF_NM_-|	9.8424	2.57247	0.947996	-2.71359	0.00665584	0.0550185	9.81712	20.5838	16.0448	3.49695	10.1095	6.26617	5.60978	9.00543	0	15.7363	8.42459	13.0143	211.86	53.4566	1.22476	-1.34687	2.57164	ARVCF	chr22:19992554:-;chr22:19992633:-	chr22_20005032_-;chr22_20005111_-
chr21:46566117-46566288:mpeak_52692|chr21_46494492_46645461_ADARB1_NR_+mpeak_52692|chr21_46494492_46641932_ADARB1_NM_+||	31.2861	1.93181	0.688746	-2.80483	0.00503437	0.0449563	58.9027	56.6056	62.8421	38.4665	48.8626	55.4315	0	5.14596	8.0224	19.2332	8.42459	13.4964	902.924	346.892	0.321117	-1.64396	1.96508	ADARB1	chr21:46566210:+;chr21:46566291:+	chr21_45146295_+
chr21:45479457-45479588:mpeak_52599|chr21_45432205_45523173_TRAPPC10_NM_+|	71.4426	1.43328	0.501767	-2.85647	0.00428378	0.0399965	29.4513	51.4596	48.1344	20.1075	21.0615	31.8129	63.11	70.757	123.01	129.387	146.588	122.431	50.2362	18.3184	0.82227	-0.633162	1.45543	TRAPPC10	chr21:45479508:+;chr21:45479579:+	chr21_44059697_+
chr21:43369779-43369839:mpeak_52457|chr21_43309453_43373999_C2CD2_NM_-|	10.3604	2.29059	0.853967	-2.68229	0.00731196	0.0585734	11.2196	9.00543	10.6965	2.62272	5.89721	8.19422	11.2196	5.14596	4.0112	15.7363	26.1162	14.4604	151.749	29.6808	0.887542	-1.46654	2.35409	C2CD2	chr21:43369789:-	chr21_41949680_-
chr21:40684105-40684176:mpeak_52377|chr21_40569341_40685712_BRWD1_NM_-|	103.074	2.62141	0.758824	-3.45457	0.000551162	0.0100212	0	7.71894	8.0224	3.49695	0.842459	5.78416	53.2929	82.3354	94.9317	290.247	307.497	382.718	10.2412	1.03253	0.636841	-2.08832	2.72516	BRWD1	chr21:40684103:-	chr21_39312200_-
chr21:40676208-40676269:mpeak_52375|chr21_40569341_40685712_BRWD1_NM_-|	109.389	4.43712	0.602066	-7.36983	1.70851e-13	7.45542e-11	36.4636	14.1514	34.7637	6.99391	2.52738	6.74818	53.2929	82.3354	94.9317	290.247	307.497	382.718	37.031	1.65937	2.39171	-2.08832	4.48003	BRWD1	chr21:40676212:-	chr21_39304287_-;chr21_39304328_-
chr21:37514368-37514440:mpeak_52234|chr21_37507262_37518373_CBR3_NM_+|	10.7328	3.90336	1.09294	-3.57144	0.000355023	0.00734712	4.20734	9.00543	10.6965	3.49695	0	0.964026	1.40245	14.1514	12.0336	26.2272	21.0615	25.5467	86.6673	9.18712	2.42214	-1.40063	3.82277	CBR3	chr21:37514424:+;chr21:37514451:+	chr21_36142142_+
chr21:34896312-34896430:mpeak_52156|chr21_34876622_34915198_GART_NM_-|	61.266	1.59312	0.470489	-3.38611	0.00070892	0.0117622	33.6587	70.757	61.5051	17.4848	28.6436	29.8848	60.3051	63.038	82.8981	91.795	90.1431	105.079	80.4498	26.4839	1.12617	-0.476802	1.60298	GART	chr21:34896316:-	chr21_33524012_-;chr21_33524075_-;chr21_33524116_-
chr20:60916941-60916998:mpeak_51665|chr20_60884531_60942368_LAMA5_NM_-|	41.6052	4.54918	0.940797	-4.83545	1.32842e-06	9.41358e-05	0	11.5784	8.0224	0	0.842459	1.92805	23.8416	29.5893	44.1232	131.136	123.841	124.359	30.1384	1.09554	2.82269	-1.9592	4.78189	LAMA5	chr20:60916947:-	chr20_62341892_-
chr20:47438201-47438289:mpeak_51013|chr20_47242465_47444420_PREX1_NM_-|	528.668	1.09462	0.380603	-2.87603	0.00402712	0.0382461	46.2807	77.1894	58.8309	20.9817	26.1162	19.2805	924.211	1146.26	1378.52	856.754	859.308	930.285	5.28564	2.50831	1.45754	0.382172	1.07536	PREX1	chr20:47438198:-;chr20:47438225:-	chr20_48821678_-
chr20:47308855-47309167:mpeak_51001|chr20_47242465_47444420_PREX1_NM_-|	589.074	1.20107	0.33006	-3.63895	0.000273749	0.00610122	185.123	258.585	286.132	73.436	89.3006	80.9782	924.211	1146.26	1378.52	856.754	859.308	930.285	21.161	9.20948	1.58239	0.382172	1.20021	PREX1	chr20:47308861:-;chr20:47309009:-;chr20:47309116:-	chr20_48692324_-;chr20_48692474_-;chr20_48692574_-
chr20:44566457-44566620:mpeak_50811|chr20_44563316_44576162_PCIF1_NM_+|	12.7694	3.06104	1.05457	-2.90263	0.0037004	0.035883	35.0611	18.0109	26.7413	10.4909	12.6369	19.7625	1.40245	3.85947	0	9.61662	11.7944	3.8561	1011.21	169.747	0.895979	-2.2636	3.15958	PCIF1	chr20:44566512:+;chr20:44566611:+	chr20_45937872_+;chr20_45937970_+
chr20:43375791-43375848:mpeak_50723|chr20_43374487_43378769_KCNK15_NM_+|	58.7344	1.68447	0.820692	-2.0525	0.0401216	0.189435	21.0367	3.85947	10.6965	6.11967	2.52738	0.964026	138.842	155.665	72.2016	88.2981	105.307	99.2947	9.70597	3.28135	1.88881	0.324227	1.56458	KCNK15	chr20:43375842:+	chr20_44747177_+;chr20_44747200_+
chr20:3342309-3342383:mpeak_49692|chr20_3233330_3388309_C20orf194_NM_-|	38.7744	3.58119	1.06631	-3.35848	0.00078372	0.0126663	82.7443	124.79	84.2352	39.3407	46.3352	58.8056	0	1.28649	2.67413	7.86815	14.3218	2.89208	4911.16	576.036	1.01394	-2.66285	3.6768	C20orf194	chr20:3342325:-	-
chr20:30960299-30960359:mpeak_50265|chr20_30946146_31022234_ASXL1_NM_+|	19.0123	3.81872	0.862157	-4.42926	9.45557e-06	0.000450553	23.8416	34.7352	13.3707	6.11967	10.952	7.23019	9.81712	1.28649	12.0336	20.9817	53.0749	34.7049	310.96	22.3441	1.56588	-2.23288	3.79876	ASXL1	chr20:30960356:+	chr20_32372570_+
chr20:19870849-19871058:mpeak_50043|chr20_19867164_19981256_RIN2_NM_+|	10.0051	2.18723	1.02695	-2.12983	0.033186	0.166744	16.8293	2.57298	6.68533	4.37119	15.1643	9.15825	2.80489	2.57298	5.34827	23.6044	16.0067	14.9424	243.216	52.5973	-0.137366	-2.34654	2.20918	RIN2	chr20:19870899:+;chr20:19870928:+;chr20:19870976:+	chr20_19890283_+;chr20_19890340_+
chr20:13564991-13565041:mpeak_49915|chr20_13371099_13619583_TASP1_NM_-|	12.6101	1.99754	0.802437	-2.48934	0.012798	0.0860571	7.01223	9.00543	6.68533	2.62272	2.52738	2.41006	16.8293	12.8649	22.7301	16.6105	26.9587	25.0647	43.3062	11.0152	1.58639	-0.388683	1.97508	TASP1	chr20:13564990:-	chr20_13584344_-
chr2:97527896-97528074:mpeak_45707|chr2_97527192_97535735_SEMA4C_NM_-|	49.4619	9.96055	1.44857	-6.87613	6.1502e-12	2.12464e-09	9.81712	14.1514	6.68533	0	0	0	2.80489	14.1514	24.0672	103.16	224.936	193.769	74.7227	#DIV/0!	Inf	-3.66916	Inf	SEMA4C	chr2:97528019:-	chr2_96862283_-
chr2:86671012-86671064:mpeak_45474|chr2_86668270_86719161_KDM3A_NM_+|	14.7191	2.60474	1.11321	-2.33983	0.0192924	0.113603	2.80489	12.8649	5.34827	5.24543	2.52738	0.482013	4.20734	18.0109	24.0672	20.9817	36.2257	43.8632	45.4097	8.16738	1.34832	-1.12673	2.47506	KDM3A	chr2:86671065:+	chr2_86443941_+
chr2:71366497-71366552:mpeak_45020|chr2_71357443_71376995_MPHOSPH10_NM_+|	10.9585	2.89204	1.4367	-2.01298	0.0441166	0.201083	0	3.85947	1.33707	0	1.68492	7.23019	0	3.85947	4.0112	41.9634	36.2257	31.3308	66.0241	12.2103	-0.778702	-3.79856	3.01986	MPHOSPH10	chr2:71366555:+	chr2_71139422_+
chr2:55841628-55841743:mpeak_44507|chr2_55777142_55844860_SMEK2_NM_-|	112.012	1.62679	0.706074	-2.30399	0.021223	0.120521	2.80489	16.7244	12.0336	2.62272	1.68492	6.26617	140.245	249.579	223.29	201.075	267.059	220.762	5.14796	1.53489	1.57773	-0.168132	1.74587	SMEK2	chr2:55841654:-;chr2:55841685:-	chr2_55614519_-
chr2:55838582-55838648:mpeak_44504|chr2_55777142_55844860_SMEK2_NM_-|	112.171	1.55895	0.737466	-2.11393	0.0345214	0.171404	2.80489	9.00543	20.056	6.99391	0.842459	4.33812	140.245	249.579	223.29	201.075	267.059	220.762	5.19746	1.76724	1.38817	-0.168132	1.5563	SMEK2	chr2:55838587:-	chr2_55611451_-
chr2:55479870-55479940:mpeak_44481|chr2_55463956_55496384_MTIF2_NM_-|	51.4613	2.63426	0.740384	-3.55796	0.000373747	0.0075212	11.2196	15.4379	6.68533	0.874238	2.52738	2.41006	64.5125	92.6273	114.988	77.8072	117.102	111.345	12.2526	1.89767	2.52035	-0.170446	2.69079	MTIF2	chr2:55479884:-	chr2_55252750_-
chr2:48045547-48045608:mpeak_44353|chr2_48035386_48132932_FBXO11_NM_-|	12.6793	2.95273	1.19297	-2.47511	0.0133194	0.0882159	0	11.5784	4.0112	3.49695	7.58213	5.30214	0	2.57298	10.6965	26.2272	42.1229	38.561	117.484	15.3223	-0.0714579	-3.01022	2.93877	FBXO11	chr2:48045552:-	chr2_47818414_-
chr2:39278523-39278586:mpeak_44076|chr2_39213456_39347604_SOS1_NM_-|	24.4638	2.16021	0.66941	-3.22704	0.00125077	0.0173124	11.2196	9.00543	8.0224	4.37119	3.36983	7.23019	22.4391	19.2974	29.4155	74.3103	58.1296	46.7553	39.7001	8.3547	0.915926	-1.33256	2.24848	SOS1	chr2:39278521:-	chr2_39051383_-
chr2:32622078-32622155:mpeak_43839|chr2_32582095_32842791_BIRC6_NM_+|	24.2526	2.06474	0.686643	-3.00701	0.00263833	0.0280082	12.622	25.7298	17.3819	9.61662	17.6916	13.4964	9.81712	24.4433	13.3707	39.3407	69.9241	37.597	117.011	27.7844	0.449817	-1.62448	2.0743	BIRC6	chr2:32622146:+	chr2_32397078_+
chr2:32424629-32424689:mpeak_43813|chr2_32390909_32445281_SLC30A6_NM_+|	42.147	3.53096	0.946975	-3.72867	0.00019249	0.00468016	0	10.2919	12.0336	0.874238	0.842459	0.964026	58.9027	84.9084	57.4939	89.1723	90.9855	99.2947	16.6356	0.959277	3.058	-0.473221	3.53122	SLC30A6	chr2:32424680:+	chr2_32199609_+
chr2:236716528-236716593:mpeak_49288|chr2_236402732_237032562_AGAP1_NM_+|	42.3241	1.68267	0.672117	-2.50354	0.0122958	0.0836985	1.40245	10.2919	10.6965	0.874238	6.73967	6.74818	43.4758	56.6056	49.4715	102.286	110.362	108.935	14.9719	4.46606	0.640647	-1.10454	1.74518	AGAP1	chr2:236716550:+;chr2:236716584:+	chr2_235807903_+;chr2_235807954_+
chr2:235861783-235861881:mpeak_49277|chr2_235860627_235962235_SH3BP4_NM_+|	34.611	1.17236	0.576041	-2.03521	0.0418297	0.194731	14.0245	18.0109	8.0224	8.74238	7.58213	8.67623	30.8538	52.7461	61.5051	66.4421	74.1364	64.5897	27.606	12.1855	0.680109	-0.49971	1.17982	SH3BP4	chr2:235861834:+	chr2_234953203_+;chr2_234953268_+
chr2:233433863-233433931:mpeak_49198|chr2_233415296_233445613_EIF4E2_NM_+|	305.787	0.79841	0.393106	-2.03103	0.0422517	0.195485	528.722	683.126	617.725	401.275	561.92	515.272	29.4513	55.3191	65.5163	67.3164	65.7118	78.0861	1217.39	700.316	0.307405	-0.490306	0.797711	EIF4E2	chr2:233433886:+;chr2:233433920:+	chr2_232569209_+
chr2:208395492-208395552:mpeak_48555|chr2_208394615_208461637_CREB1_NM_+|	80.1024	2.32436	0.525527	-4.42291	9.73783e-06	0.000458729	33.6587	36.0217	18.7189	22.7302	30.3285	13.0143	40.6709	69.4705	62.8421	221.182	200.505	212.086	51.1028	10.4253	0.419974	-1.87333	2.29331	CREB1	chr2:208395546:+	chr2_207530792_+;chr2_207530820_+
chr2:20821939-20822002:mpeak_43327|chr2_20819005_20850864_HS1BP3_NM_-|	7.00364	2.3015	1.15125	-1.99913	0.0455944	0.204891	2.80489	7.71894	18.7189	0.874238	1.68492	6.26617	7.01223	6.43245	4.0112	9.61662	12.6369	6.26617	167.524	30.9447	1.72836	-0.708244	2.4366	HS1BP3	chr2:20821947:-	chr2_20622188_-
chr2:202006162-202006330:mpeak_48307|chr2_201980826_202027718_CFLAR_NM_+|	131.965	1.01068	0.360447	-2.80396	0.00504797	0.0449563	129.025	118.357	114.988	192.332	194.608	200.517	54.6954	65.611	28.0784	169.602	149.958	165.812	244.21	121.032	-0.697022	-1.70975	1.01273	CFLAR	chr2:202006216:+;chr2:202006321:+	chr2_201141490_+;chr2_201141537_+;chr2_201141596_+
chr2:175222897-175223036:mpeak_47660|chr2_175213900_175260443_CIR1_NM_-|	30.2337	2.29486	0.929287	-2.46949	0.0135306	0.089161	9.81712	9.00543	18.7189	1.74848	14.3218	6.26617	8.41467	47.6001	21.3931	59.4482	81.7185	84.3523	48.4983	9.90446	0.749086	-1.5427	2.29178	CIR1	chr2:175222901:-;chr2:175222936:-	chr2_174358211_-
chr2:171917584-171917676:mpeak_47523|chr2_171850466_172087824_TLK1_NM_-|	51.1562	1.59603	0.735988	-2.16856	0.030116	0.15529	21.0367	3.85947	2.67413	13.9878	11.7944	5.78416	40.6709	45.0272	40.112	117.148	160.91	150.87	21.9142	7.35937	-0.195275	-1.76949	1.57421	TLK1	chr2:171917590:-;chr2:171917666:-	chr2_171061108_-;chr2_171061157_-
chr2:160317434-160317567:mpeak_47256|chr2_160176929_160473112_BAZ2B_NM_-|	22.3638	3.6425	0.849654	-4.28704	1.81074e-05	0.000773857	4.20734	10.2919	24.0672	6.11967	7.58213	13.4964	9.81712	3.85947	6.68533	44.5862	64.8693	72.784	189.405	14.9244	0.503838	-3.16189	3.66573	BAZ2B	chr2:160317442:-	-
chr2:159948258-159948317:mpeak_47220|chr2_159825145_160086088_TANC1_NM_+|	13.4499	2.34881	0.889621	-2.64024	0.00828484	0.0642218	5.60978	6.43245	4.0112	6.11967	5.89721	1.44604	4.20734	9.00543	13.3707	31.4726	32.8559	40.9711	60.3889	12.7853	0.253891	-1.9859	2.23979	TANC1	chr2:159948315:+	chr2_159091803_+
chr2:149502269-149502323:mpeak_47002|chr2_149402559_149543873_EPC2_NM_+|	28.5805	3.15058	0.974833	-3.23192	0.00122961	0.0171339	2.80489	18.0109	16.0448	5.24543	8.42459	6.74818	26.6465	20.5838	1.33707	63.8194	81.7185	91.5825	75.8957	8.6109	0.852222	-2.28756	3.13978	EPC2	chr2:149502323:+	chr2_148744752_+
chr2:136102688-136102763:mpeak_46778|chr2_135958010_136288806_ZRANB3_NM_-|	17.6644	3.22542	0.906867	-3.55666	0.000375595	0.0075401	29.4513	45.0272	37.4379	17.4848	29.4861	13.4964	0	5.14596	1.33707	13.1136	8.42459	11.5683	1150.87	182.645	0.888197	-2.35237	3.24057	ZRANB3	chr2:136102691:-	chr2_135345118_-
chr2:135815822-135815894:mpeak_46755|chr2_135809834_135926114_RAB3GAP1_NM_+|	111.095	2.88986	0.92463	-3.12543	0.00177548	0.0216797	8.41467	11.5784	0	1.74848	2.52738	0	168.293	241.86	155.1	195.829	302.443	245.345	5.30552	0.862511	2.22522	-0.395661	2.62088	RAB3GAP1	chr2:135815881:+	chr2_135058346_+
chr2:133419425-133419479:mpeak_46716|chr2_133403853_133429070_LYPD1_NM_-|	42.0843	2.06912	0.766492	-2.69947	0.00694504	0.0566745	9.81712	3.85947	9.35947	0	1.68492	2.41006	75.732	83.6219	97.6059	65.5679	75.8213	79.5321	8.96485	2.78039	2.49196	0.21801	2.27395	LYPD1	chr2:133419428:-	chr2_132661856_-
chr2:11721196-11721403:mpeak_43188|chr2_11674241_11780416_GREB1_NM_+|	116.948	0.859145	0.359419	-2.39037	0.0168313	0.103446	93.9638	114.498	139.055	85.6754	90.1431	93.0285	85.5492	132.509	109.639	147.746	132.266	179.309	106.048	58.5314	0.370296	-0.48714	0.857436	GREB1	chr2:11721329:+;chr2:11721391:+	chr2_11581202_+;chr2_11581264_+
chr2:11691850-11691907:mpeak_43184|chr2_11674241_11780416_GREB1_NM_+|	68.2945	3.93355	0.895061	-4.39473	1.10909e-05	0.000513714	14.0245	5.14596	10.6965	0	1.68492	0.964026	85.5492	132.509	109.639	147.746	132.266	179.309	9.11419	0.865063	3.49506	-0.48714	3.9822	GREB1	chr2:11691933:+	chr2_11551774_+
chr2:103393025-103393082:mpeak_45968|chr2_103378489_103431206_TMEM182_NM_+|	5.0539	4.289	1.58924	-2.69878	0.00695948	0.0567365	1.40245	12.8649	5.34827	0	1.68492	1.92805	0	7.71894	0	8.74238	8.42459	12.5323	84.7077	18.2477	2.44075	-1.94395	4.3847	TMEM182	chr2:103393080:+	-
chr19:58365415-58365473:mpeak_42752|chr19_58361180_58369943_ZNF587_NM_+|	35.4716	3.11357	0.785438	-3.96412	7.36661e-05	0.0023223	2.80489	2.57298	13.3707	5.24543	5.89721	2.89208	12.622	27.0163	14.7077	111.903	126.369	100.259	34.4984	4.14578	0.417778	-2.63904	3.05681	ZNF587	chr19:58365467:+	chr19_57854098_+
chr19:57706137-57706338:mpeak_42649|chr19_57702867_57722721_ZNF264_NM_+|	13.3052	5.20553	1.36945	-3.80117	0.000144012	0.00374295	11.2196	5.14596	9.35947	15.7363	16.8492	11.0863	0	0	1.33707	31.4726	19.3765	38.079	641.329	49.109	-0.76353	-6.0555	5.29197	ZNF264	chr19:57706224:+;chr19:57706315:+	chr19_57194855_+;chr19_57194962_+
chr19:5562642-5562715:mpeak_39548|chr19_5561410_5568045_TINCR_NR_-|	23.6243	2.20151	0.744915	-2.95539	0.00312279	0.0316605	36.4636	48.8866	49.4715	6.11967	11.7944	26.0287	9.81712	21.8703	9.35947	22.7302	16.8492	24.1006	328.457	69.0056	1.61735	-0.633567	2.25092	TINCR	chr19:5562646:-	chr19_5562636_-
chr19:53122046-53122102:mpeak_42332|chr19_53118050_53193834_ZNF83_NM_-|	11.4263	2.50849	0.910206	-2.75597	0.00585192	0.0501472	9.81712	6.43245	1.33707	3.49695	5.89721	3.8561	11.2196	6.43245	2.67413	22.7302	32.8559	30.3668	86.5222	15.4157	0.408458	-2.08021	2.48867	ZNF83	chr19:53122047:-	-
chr19:52641595-52641650:mpeak_42258|chr19_52620277_52643191_ZNF616_NM_-|	7.34132	5.89352	1.54311	-3.81924	0.000133862	0.00358017	1.40245	12.8649	9.35947	1.74848	4.21229	7.23019	1.40245	0	0	17.4848	19.3765	13.0143	561.562	26.4477	0.840875	-5.15232	5.9932	ZNF616	chr19:52641594:-	chr19_52138345_-
chr19:52485097-52485227:mpeak_42222|chr19_52469467_52490079_ZNF350_NM_-|	10.7525	2.83529	0.968939	-2.92618	0.00343154	0.0338701	1.40245	7.71894	13.3707	4.37119	3.36983	3.37409	7.01223	3.85947	10.6965	17.4848	20.219	36.151	104.283	15.05	1.01689	-1.77578	2.79268	ZNF350	chr19:52485173:-	chr19_51981904_-
chr19:49663111-49663187:mpeak_42035|chr19_49661015_49714750_TRPM4_NM_+|	38.2505	1.50653	0.695685	-2.16554	0.0303463	0.155799	89.7565	115.784	54.8197	37.5922	45.4928	39.5251	15.4269	14.1514	2.67413	12.2393	21.9039	9.64026	807.258	280.037	1.08643	-0.44098	1.52741	TRPM4	chr19:49663179:+	chr19_49159921_+
chr19:48694189-48694258:mpeak_41930|chr19_48673948_48697909_C19orf68_NM_+|	19.7323	2.99746	0.852791	-3.51488	0.000439948	0.00854242	12.622	10.2919	2.67413	1.74848	7.58213	4.82013	12.622	16.7244	6.68533	41.0892	74.1364	45.7912	71.0154	8.78836	0.854594	-2.15987	3.01447	C19orf68	chr19:48694245:+	chr19_48190987_+
chr19:47251850-47251999:mpeak_41804|chr19_47249302_47258668_FKRP_NM_+|	15.5828	2.71385	0.979287	-2.77125	0.00558408	0.0484792	8.41467	14.1514	2.67413	3.49695	0.842459	0.482013	37.866	16.7244	20.056	24.4787	26.9587	30.8488	33.813	5.85934	2.38819	-0.140577	2.52877	FKRP	chr19:47251900:+	chr19_46748643_+
chr19:46499548-46499602:mpeak_41777|chr19_46498718_46521547_CCDC61_NM_+|	5.25654	3.3397	1.37078	-2.43635	0.0148363	0.094987	7.01223	9.00543	10.6965	0.874238	0	2.41006	4.20734	2.57298	6.68533	13.1136	5.05475	1.44604	198.388	25.1166	3.02395	-0.542627	3.56657	CCDC61	chr19:46499600:+	chr19_45996340_+
chr19:46293936-46294009:mpeak_41764|chr19_46287548_46296060_DMWD_NM_-|	54.2551	1.88288	0.532997	-3.53263	0.000411447	0.00813135	26.6465	19.2974	49.4715	7.86815	10.952	13.9784	65.9149	81.0489	80.224	81.3042	111.205	103.151	41.9984	11.0933	1.54059	-0.380051	1.92064	DMWD	chr19:46293940:-;chr19:46293965:-	chr19_45790691_-
chr19:46292513-46292576:mpeak_41762|chr19_46287548_46296060_DMWD_NM_-|	48.5348	2.2817	0.588539	-3.87689	0.000105802	0.00300412	11.2196	23.1568	12.0336	4.37119	5.89721	2.89208	65.9149	81.0489	80.224	81.3042	111.205	103.151	20.428	4.45123	1.81822	-0.380051	2.19827	DMWD	chr19:46292513:-	chr19_45789258_-;chr19_45789314_-
chr19:45163715-45163777:mpeak_41668|chr19_45147097_45165006_PVR_NM_+|	142.056	2.04337	0.504653	-4.04906	5.14248e-05	0.00182207	14.0245	20.5838	13.3707	5.24543	5.89721	5.30214	245.428	240.574	196.549	353.192	336.983	267.517	7.02937	1.71712	1.54477	-0.488627	2.0334	PVR	chr19:45163774:+	chr19_44660457_+;chr19_44660504_+
chr19:41866915-41866967:mpeak_41492|chr19_41860918_41870078_B9D2_NM_-|	32.8613	1.92296	0.685616	-2.80471	0.00503611	0.0449563	12.622	11.5784	5.34827	3.49695	2.52738	4.33812	44.8782	34.7352	69.5275	59.4482	74.9788	70.8559	19.8126	5.04788	1.51173	-0.460937	1.97267	B9D2	chr19:41866916:-	chr19_41361012_-
chr19:38398256-38398383:mpeak_41249|chr19_38397860_38696736_SIPA1L3_NM_+|	16.5666	3.11662	0.990726	-3.14579	0.00165639	0.0208393	4.20734	9.00543	9.35947	0.874238	0.842459	1.44604	16.8293	41.1677	17.3819	41.0892	32.0134	24.5827	29.945	3.23768	2.8353	-0.37398	3.20928	SIPA1L3	chr19:38398377:+	chr19_37907736_+
chr19:38260856-38260925:mpeak_41247|chr19_38231095_38270230_ZNF573_NM_-|	8.03753	3.3777	1.10439	-3.05843	0.00222501	0.0247286	5.60978	11.5784	6.68533	4.37119	0.842459	4.33812	0	2.57298	9.35947	20.9817	11.7944	18.3165	133.382	18.695	1.32157	-2.09823	3.4198	ZNF573	chr19:38260874:-	chr19_37770234_-
chr19:37876492-37876549:mpeak_41204|chr19_37862058_37879207_ZNF527_NM_+|	3.71761	5.11817	1.66144	-3.08057	0.00206603	0.0238572	1.40245	6.43245	2.67413	2.62272	1.68492	5.30214	0	0	0	11.3651	5.89721	7.23019	#DIV/0!	39.2356	0.129055	-Inf	Inf	ZNF527	chr19:37876546:+	chr19_37385641_+
chr19:37845802-37845852:mpeak_41201|chr19_37825579_37853010_HKR1_NM_+|	6.84727	2.99952	1.44243	-2.07949	0.0375722	0.180872	4.20734	1.28649	1.33707	1.74848	3.36983	4.33812	0	5.14596	0	7.86815	27.8011	25.0647	44.2476	15.5702	-0.469221	-3.56099	3.09177	HKR1	chr19:37845853:+	chr19_37354950_+
chr19:35501473-35501572:mpeak_41013|chr19_35491245_35516952_GRAMD1A_NM_+|	36.7854	1.39453	0.543918	-2.56387	0.0103513	0.0746933	18.2318	21.8703	25.4043	12.2393	16.0067	7.71221	47.6831	37.3082	57.4939	59.4482	55.6023	82.4242	45.9742	18.209	0.865313	-0.470855	1.33617	GRAMD1A	chr19:35501539:+;chr19:35501573:+	chr19_35010634_+;chr19_35010689_+
chr19:338300-338359:mpeak_39146|chr19_306711_344791_MIER2_NM_-|	16.1047	2.87274	1.04473	-2.74974	0.00596431	0.050786	4.20734	19.2974	16.0448	5.24543	15.1643	6.74818	0	9.00543	12.0336	24.4787	53.0749	27.9568	125.321	25.7395	0.542289	-2.32624	2.86853	MIER2	chr19:338307:-	chr19_338308_-
chr19:337221-337304:mpeak_39145|chr19_306711_344791_MIER2_NM_-|	18.3433	2.94611	0.968127	-3.0431	0.00234151	0.0257376	5.60978	20.5838	30.7525	10.4909	12.6369	13.4964	0	9.00543	12.0336	24.4787	53.0749	27.9568	180.446	34.7114	0.636805	-2.32624	2.96305	MIER2	chr19:337237:-	chr19_337247_-
chr19:24248418-24248485:mpeak_40827|chr19_24216206_24309055_ZNF254_NM_+|	10.3523	3.07554	1.33167	-2.30953	0.020914	0.119503	4.20734	20.5838	16.0448	13.1136	21.0615	18.3165	0	0	2.67413	7.86815	5.89721	14.4604	509.024	185.97	-0.362244	-3.39987	3.03762	ZNF254	chr19:24248474:+	chr19_24065678_+
chr19:24239071-24239139:mpeak_40821|chr19_24216206_24309055_ZNF254_NM_+|	6.22335	3.54582	1.47531	-2.40343	0.016242	0.100946	8.41467	9.00543	5.34827	1.74848	13.4793	5.78416	0	0	2.67413	7.86815	5.89721	14.4604	283.81	74.4426	0.11582	-3.39987	3.51569	ZNF254	chr19:24239139:+	chr19_24056336_+
chr19:24113449-24113507:mpeak_40812|chr19_24097683_24115144_ZNF726_NM_+|	5.50284	3.19569	1.58112	-2.02116	0.0432628	0.198501	12.622	14.1514	0	4.37119	7.58213	7.23019	0	2.57298	0	7.86815	3.36983	6.26617	520.28	109.594	0.480933	-2.76618	3.24712	ZNF726	chr19:24113508:+	chr19_23930705_+
chr19:24112032-24112092:mpeak_40811|chr19_24097683_24115144_ZNF726_NM_+|	26.6306	4.52296	1.18033	-3.83194	0.000127135	0.00341671	58.9027	87.4813	86.9093	15.7363	24.4313	26.0287	0	2.57298	0	7.86815	3.36983	6.26617	3022.35	378.175	1.81732	-2.76618	4.58351	ZNF726	chr19:24112086:+	chr19_23929286_+
chr19:24106698-24106819:mpeak_40807|chr19_24097683_24115144_ZNF726_NM_+|	10.4949	4.61088	1.46052	-3.15702	0.00159391	0.0203901	12.622	47.6001	22.7301	4.37119	15.1643	3.37409	0	2.57298	0	7.86815	3.36983	6.26617	1074.66	130.881	1.85633	-2.76618	4.62252	ZNF726	chr19:24106767:+	chr19_23923946_+
chr19:24104266-24104347:mpeak_40806|chr19_24097683_24115144_ZNF726_NM_+|	14.0792	3.22516	1.36969	-2.35466	0.0185395	0.110688	7.01223	33.4488	46.7973	15.7363	26.1162	19.7625	0	2.57298	0	7.86815	3.36983	6.26617	1130.44	352.002	0.50201	-2.76618	3.26819	ZNF726	chr19:24104343:+	chr19_23921540_+
chr19:23452683-23452747:mpeak_40760|chr19_23442918_23457053_IPO5P1_NR_-|	13.4966	2.76411	0.860255	-3.21313	0.00131297	0.0179339	8.41467	15.4379	1.33707	3.49695	4.21229	2.41006	12.622	10.2919	12.0336	25.3529	37.9106	28.4388	72.0784	11.035	1.31572	-1.39177	2.70749	IPO5P1	chr19:23452691:-	chr19_23269890_-
chr19:22260486-22260545:mpeak_40722|chr19_22235265_22270778_ZNF257_NM_+|	10.1451	2.63897	1.17489	-2.24614	0.0246952	0.133647	2.80489	3.85947	2.67413	8.74238	12.6369	2.89208	1.40245	1.28649	2.67413	24.4787	26.9587	31.3308	174.126	29.3245	-1.37799	-3.94795	2.56995	ZNF257	chr19:22260541:+	chr19_22077734_+
chr19:22021724-22021782:mpeak_40717|chr19_21992609_22034870_ZNF43_NM_-|	9.68423	4.03085	1.30787	-3.08201	0.00205611	0.0238098	2.80489	9.00543	4.0112	7.86815	7.58213	10.1223	2.80489	0	0	27.1014	29.4861	15.4244	188.023	35.5116	-0.692707	-4.68222	3.98951	ZNF43	chr19:22021729:-	chr19_21838930_-
chr19:21934899-21934963:mpeak_40710|chr19_21910791_21950430_ZNF100_NM_-|	16.6025	2.51412	0.857156	-2.9331	0.00335595	0.0333223	11.2196	6.43245	5.34827	6.99391	2.52738	2.41006	7.01223	11.5784	24.0672	50.7058	32.8559	38.079	53.9181	9.80868	0.946895	-1.51174	2.45864	ZNF100	chr19:21934912:-	chr19_21752110_-
chr19:21702473-21702531:mpeak_40688|chr19_21688436_21719081_ZNF429_NM_+|	26.3036	6.15739	1.32996	-4.62974	3.66121e-06	0.000212273	102.378	57.8921	48.1344	30.5983	21.0615	33.7409	0	0	0	7.86815	6.73967	7.23019	#DIV/0!	391.065	1.28707	-Inf	Inf	ZNF429	chr19:21702528:+	chr19_21519725_+
chr19:21690410-21690475:mpeak_40687|chr19_21688436_21719081_ZNF429_NM_+|	5.51151	6.74002	1.54972	-4.34919	1.36643e-05	0.000602	4.20734	16.7244	13.3707	3.49695	5.05475	1.44604	0	0	0	7.86815	6.73967	7.23019	#DIV/0!	45.7814	1.77863	-Inf	Inf	ZNF429	chr19:21690464:+;chr19:21690491:+	chr19_21507662_+
chr19:21274505-21274580:mpeak_40643|chr19_21264952_21307763_ZNF714_NR_+mpeak_40643|chr19_21264952_21299612_ZNF714_NM_+||	70.7949	2.82629	0.512966	-5.50971	3.5942e-08	4.51508e-06	22.4391	28.3028	21.3931	7.86815	6.73967	5.30214	100.976	99.0598	61.5051	168.728	144.06	183.165	27.5808	4.01448	1.85721	-0.923168	2.78038	ZNF714	chr19:21274564:+	chr19_21091771_+
chr19:20043669-20043752:mpeak_40597|chr19_20011721_20043990_ZNF93_NM_+|	13.2977	3.16845	0.888238	-3.56712	0.000360927	0.0073591	4.20734	15.4379	16.0448	3.49695	10.1095	9.15825	9.81712	2.57298	2.67413	28.8499	27.8011	29.4028	236.919	26.454	0.648722	-2.51411	3.16283	ZNF93	chr19:20043747:+	chr19_19932941_+
chr19:19215989-19216045:mpeak_40519|chr19_19174802_19221377_SLC25A42_NM_+|	13.0875	3.03965	1.04156	-2.91837	0.00351861	0.0345466	2.80489	9.00543	8.0224	2.62272	5.05475	2.41006	2.80489	12.8649	9.35947	13.1136	51.39	37.597	79.2381	9.88	0.97531	-2.0283	3.00361	SLC25A42	chr19:19216046:+	chr19_19105240_+
chr19:16967847-16967919:mpeak_40368|chr19_16940197_16989307_SIN3B_NM_+|	45.4457	3.78286	0.614137	-6.15963	7.29131e-10	1.55006e-07	16.8293	16.7244	38.7749	8.74238	6.73967	8.19422	19.6342	36.0217	25.4043	129.387	144.903	93.9925	89.2283	6.42883	1.61113	-2.18375	3.79487	SIN3B	chr19:16967914:+	chr19_16857105_+
chr19:16965589-16965944:mpeak_40366|chr19_16940197_16989307_SIN3B_NM_+|	109.028	3.40845	0.436977	-7.80006	6.18789e-15	3.20649e-12	154.269	225.136	223.29	78.6815	98.5677	79.0501	19.6342	36.0217	25.4043	129.387	144.903	93.9925	743.515	69.5931	1.2336	-2.18375	3.41735	SIN3B	chr19:16965640:+;chr19:16965668:+;chr19:16965709:+;chr19:16965735:+;chr19:16965779:+;chr19:16965861:+;chr19:16965942:+	chr19_16854856_+;chr19_16854897_+;chr19_16854919_+;chr19_16854967_+;chr19_16854998_+;chr19_16855049_+
chr19:16965125-16965410:mpeak_40365|chr19_16940197_16989307_SIN3B_NM_+|	58.192	3.52007	0.575893	-6.11237	9.81623e-10	1.98503e-07	39.2685	96.4868	42.7861	22.7302	23.5888	24.1006	19.6342	36.0217	25.4043	129.387	144.903	93.9925	220.258	19.1211	1.34221	-2.18375	3.52596	SIN3B	chr19:16965196:+;chr19:16965263:+;chr19:16965326:+;chr19:16965370:+;chr19:16965398:+	chr19_16854384_+;chr19_16854453_+;chr19_16854532_+;chr19_16854581_+
chr19:15308035-15308130:mpeak_40256|chr19_15272525_15311792_NOTCH3_NM_-|	25.2013	1.42617	0.568286	-2.5096	0.0120868	0.0827512	11.2196	20.5838	16.0448	11.3651	18.5341	16.3884	22.4391	16.7244	18.7189	40.215	61.4995	48.6833	82.6645	30.7768	0.0478383	-1.37759	1.42542	NOTCH3	chr19:15308063:-	chr19_15197253_-
chr19:15303753-15303813:mpeak_40255|chr19_15272525_15311792_NOTCH3_NM_-|	27.9414	2.17269	0.682269	-3.18451	0.00144999	0.0191117	14.0245	43.7407	22.7301	7.86815	22.7464	15.9064	22.4391	16.7244	18.7189	40.215	61.4995	48.6833	139.067	30.9319	0.791023	-1.37759	2.16861	NOTCH3	chr19:15303758:-	-
chr19:12723160-12723212:mpeak_40059|chr19_12721731_12738534_ZNF791_NM_+|	55.3881	6.32055	0.904793	-6.98563	2.8359e-12	1.06875e-09	9.81712	5.14596	17.3819	0.874238	2.52738	0.482013	11.2196	25.7298	28.0784	159.986	213.984	189.431	49.7402	0.689318	3.05806	-3.11503	6.1731	ZNF791	chr19:12723210:+	chr19_12612396_+
chr19:12721257-12721320:mpeak_40058|chr19_12692538_12721623_ZNF490_NM_-|	9.19674	3.51794	1.05946	-3.3205	0.000898553	0.0140066	7.01223	11.5784	8.0224	3.49695	2.52738	10.1223	2.80489	0	5.34827	15.7363	24.4313	19.2805	217.609	27.1608	0.720903	-2.8662	3.5871	ZNF490	chr19:12721255:-	chr19_12610443_-
chr18:77960406-77960566:mpeak_39137|chr18_77918489_78005397_PARD6G_NM_-|	19.5035	1.61523	0.675601	-2.39081	0.0168114	0.1034	28.0489	32.1623	46.7973	26.2272	15.1643	24.5827	2.80489	10.2919	8.0224	12.2393	11.7944	15.9064	506.688	165.182	0.697754	-0.919285	1.61704	PARD6G	chr18:77960431:-;chr18:77960516:-	chr18_80202525_-
chr18:32409233-32409302:mpeak_38486|chr18_32073253_32467729_DTNA_NM_+|	103.06	3.03671	0.377681	-8.04042	8.95301e-16	5.43032e-13	110.793	69.4705	81.5611	40.215	51.39	39.5251	65.9149	43.7407	56.1568	221.182	231.676	225.1	157.904	19.3419	0.997604	-2.03164	3.02925	DTNA	chr18:32409288:+	chr18_34829339_+
chr18:29992708-29992977:mpeak_38471|chr18_29848731_30050447_GAREM_NM_-|	141.623	1.88847	0.501862	-3.76293	0.000167933	0.00421918	387.075	212.271	242.009	241.29	122.999	174.007	33.6587	30.8758	30.7525	62.0709	69.9241	92.5465	882.969	239.731	0.644316	-1.23663	1.88095	GAREM	chr18:29992953:-	-
chr18:29991839-29991894:mpeak_38469|chr18_29848731_30050447_GAREM_NM_-|	32.5528	1.93353	0.561363	-3.44434	0.00057245	0.0102731	12.622	18.0109	13.3707	5.24543	10.952	10.6043	33.6587	30.8758	30.7525	62.0709	69.9241	92.5465	46.18	11.9362	0.715296	-1.23663	1.95193	GAREM	chr18:29991843:-	chr18_32411877_-
chr18:2582798-2582866:mpeak_37893|chr18_2571509_2616435_NDC80_NM_+|	14.7034	2.49607	1.00834	-2.47543	0.0133077	0.0882159	15.4269	18.0109	24.0672	5.24543	5.89721	14.4604	0	19.2974	6.68533	17.4848	18.5341	31.3308	147.547	38.0151	1.16737	-1.37412	2.54149	NDC80	chr18:2582850:+	chr18_2582845_+
chr18:14120128-14120186:mpeak_38194|chr18_14077525_14132489_ZNF519_NR_-mpeak_38194|chr18_14106408_14132489_ZNF519_NM_-||	4.01592	4.03952	1.62338	-2.48834	0.012834	0.086229	11.2196	3.85947	5.34827	2.62272	3.36983	6.26617	0	1.28649	0	3.49695	2.52738	8.19422	529.277	86.2164	0.73669	-3.46626	4.20295	ZNF519	chr18:14120128:-	chr18_14120130_-
chr18:13543476-13543627:mpeak_38159|chr18_13218728_13645125_LDLRAD4_NM_+|	36.2996	2.17906	0.736973	-2.95677	0.00310879	0.0316119	25.244	75.9029	45.4603	40.215	58.9721	45.7912	4.20734	14.1514	8.0224	32.3468	26.9587	58.3236	555.728	123.25	0.0161192	-2.15667	2.17279	LDLRAD4	chr18:13543622:+	chr18_13543622_+
chr17:948229-948286:mpeak_33284|chr17_909409_982386_ABR_NM_-|	23.4686	2.64267	0.877112	-3.01292	0.00258749	0.0276098	14.0245	14.1514	1.33707	6.99391	3.36983	0.964026	22.4391	20.5838	32.0896	59.4482	48.8626	57.3595	39.2916	6.83753	1.38148	-1.14119	2.52267	ABR	chr17:948233:-	chr17_1044994_-
chr17:902912-902962:mpeak_33280|chr17_900356_904251_TIMM22_NM_+|	45.4324	4.64403	0.78592	-5.90904	3.44104e-09	6.48401e-07	5.60978	20.5838	8.0224	1.74848	3.36983	0.482013	30.8538	38.5947	41.4491	133.758	137.321	123.395	30.8537	1.41969	2.61109	-1.8307	4.44179	TIMM22	chr17:902964:+	chr17_999722_+
chr17:80545303-80545393:mpeak_37779|chr17_80477593_80559178_FOXK2_NM_+|	83.3712	2.16344	0.734391	-2.9459	0.0032202	0.0324014	4.20734	16.7244	5.34827	9.61662	2.52738	5.78416	46.2807	104.206	88.2464	195.829	266.217	255.467	11.0081	2.49865	0.551737	-1.58761	2.13935	FOXK2	chr17:80545394:+	chr17_82587511_+
chr17:80478545-80478601:mpeak_37772|chr17_80477593_80559178_FOXK2_NM_+|	83.6438	2.31734	0.77681	-2.98315	0.00285294	0.0297091	11.2196	16.7244	1.33707	10.4909	3.36983	4.33812	46.2807	104.206	88.2464	195.829	266.217	255.467	12.2652	2.53637	0.686121	-1.58761	2.27373	FOXK2	chr17:80478597:+	chr17_82520720_+
chr17:79224668-79224734:mpeak_37617|chr17_79220473_79269139_SLC38A10_NM_-|	79.6454	1.60277	0.420531	-3.81131	0.00013823	0.00364989	120.61	92.6273	69.5275	58.574	61.4995	61.6977	43.4758	70.757	52.1456	88.2981	107.835	128.697	169.953	55.9588	0.637481	-0.965218	1.6027	SLC38A10	chr17:79224670:-	chr17_81250873_-
chr17:79223859-79224044:mpeak_37615|chr17_79220473_79269139_SLC38A10_NM_-|	57.9245	1.30729	0.549933	-2.37719	0.0174451	0.106273	21.0367	50.1731	42.7861	18.359	38.7531	32.7769	43.4758	70.757	52.1456	88.2981	107.835	128.697	68.5161	27.6726	0.342766	-0.965218	1.30798	SLC38A10	chr17:79223863:-;chr17:79223939:-;chr17:79223990:-	chr17_81250060_-;chr17_81250139_-;chr17_81250192_-
chr17:77986847-77987002:mpeak_37534|chr17_77914906_78009657_TBC1D16_NM_-|	166.36	0.886523	0.437198	-2.02774	0.042587	0.196488	110.793	127.363	68.1904	47.2089	42.9654	38.079	380.063	256.012	246.02	280.631	187.868	211.122	34.7294	18.8713	1.25617	0.376204	0.879963	TBC1D16	chr17:77986853:-	chr17_80013054_-
chr17:77753487-77753547:mpeak_37498|chr17_77751976_77757530_CBX2_NM_+|	109.048	3.52359	0.808703	-4.35709	1.318e-05	0.000584362	25.244	23.1568	4.0112	3.49695	4.21229	14.9424	49.0856	84.9084	62.8421	263.146	364.785	408.747	26.6273	2.18502	1.21028	-2.3969	3.60718	CBX2	chr17:77753538:+	chr17_79779739_+
chr17:73793200-73793255:mpeak_37284|chr17_73780919_73820342_UNK_NM_+|	17.0824	3.30605	0.892413	-3.70462	0.000211712	0.00507312	5.60978	12.8649	8.0224	0.874238	3.36983	6.74818	15.4269	10.2919	5.34827	46.3346	30.3285	59.7696	85.2899	8.0569	1.26935	-2.13473	3.40408	UNK	chr17:73793251:+	chr17_75797169_+
chr17:73782414-73782490:mpeak_37280|chr17_73780919_73789523_UNK_NR_+mpeak_37280|chr17_73780919_73820342_UNK_NM_+||	15.8751	2.49354	0.987109	-2.52611	0.0115334	0.0804914	1.40245	10.2919	1.33707	2.62272	2.52738	4.82013	15.4269	10.2919	5.34827	46.3346	30.3285	59.7696	41.9461	7.30779	0.386299	-2.13473	2.52103	UNK	chr17:73782476:+	chr17_75786392_+
chr17:6553547-6553688:mpeak_33709|chr17_6547979_6554954_MED31_NM_-|	41.8092	1.68651	0.562292	-2.99934	0.00270562	0.0284218	40.6709	66.8975	46.7973	29.7241	48.8626	55.4315	9.81712	27.0163	18.7189	61.1967	52.2324	44.3452	277.874	84.943	0.203924	-1.50594	1.70987	MED31	chr17:6553528:-;chr17:6553636:-	chr17_6650209_-;chr17_6650314_-
chr17:62808010-62808079:mpeak_36869|chr17_62781485_62833302_PLEKHM1P_NR_-|	4.14917	4.14656	1.74341	-2.37843	0.0173868	0.105995	8.41467	0	2.67413	5.24543	3.36983	8.67623	0	0	0	6.11967	10.952	4.33812	#DIV/0!	80.7646	-0.640959	-Inf	Inf	PLEKHM1P	chr17:62808012:-	chr17_64811894_-
chr17:60513038-60513095:mpeak_36651|chr17_60501245_60525935_METTL2A_NM_+|	93.3485	1.357	0.65784	-2.06281	0.0391306	0.186043	7.01223	2.57298	9.35947	3.49695	3.36983	9.64026	127.623	84.9084	101.617	288.499	229.991	252.093	6.03049	2.14215	0.19871	-1.29451	1.49322	METTL2A	chr17:60513096:+	chr17_62435733_+
chr17:59816409-59816477:mpeak_36576|chr17_59761501_59940920_BRIP1_NM_-|	181.101	1.48559	0.359858	-4.12827	3.65509e-05	0.00140032	47.6831	46.3137	53.4827	29.7241	32.8559	39.5251	199.147	230.282	220.616	347.073	417.017	509.488	22.6876	8.01719	0.53046	-0.970275	1.50073	BRIP1	chr17:59816422:-	chr17_61739065_-
chr17:59806262-59806321:mpeak_36575|chr17_59761501_59940920_BRIP1_NM_-|	173.316	1.38482	0.487804	-2.83889	0.00452701	0.0418829	26.6465	28.3028	34.7637	9.61662	30.3285	26.5107	199.147	230.282	220.616	347.073	417.017	509.488	13.801	5.21805	0.432921	-0.970275	1.4032	BRIP1	chr17:59806269:-	chr17_61728910_-
chr17:53063533-53063714:mpeak_35967|chr17_53046125_53237157_STXBP4_NM_+|	3.18833	4.23743	1.9333	-2.19181	0.0283933	0.148523	1.40245	9.00543	5.34827	3.49695	3.36983	5.30214	0	0	0	2.62272	0	7.71221	#DIV/0!	78.4972	0.372712	-Inf	Inf	STXBP4	chr17:53063610:+	chr17_54986248_+;chr17_54986353_+
chr17:52994744-52994838:mpeak_35950|chr17_52978051_53038595_TOM1L1_NM_+|	22.849	2.42957	1.04796	-2.31838	0.0204284	0.117865	2.80489	11.5784	13.3707	0.874238	3.36983	0.482013	16.8293	69.4705	45.4603	27.1014	47.1777	35.669	21.064	4.29847	2.55398	0.261092	2.29288	TOM1L1	chr17:52994813:+	chr17_54917468_+
chr17:3742393-3742454:mpeak_33497|chr17_3716573_3749545_C17orf85_NM_-|	92.8574	1.86772	0.718579	-2.59918	0.00934458	0.0694851	2.80489	9.00543	5.34827	3.49695	4.21229	3.37409	92.5614	82.3354	153.763	217.685	311.71	227.992	5.22078	1.46336	0.630539	-1.20444	1.83498	C17orf85	chr17:3742402:-	chr17_3839104_-;chr17_3839141_-
chr17:35685576-35685692:mpeak_34982|chr17_35444374_35766902_ACACA_NM_-|	67.2717	1.09327	0.469865	-2.32677	0.0199776	0.116167	46.2807	108.065	86.9093	39.3407	57.2872	57.3595	64.5125	56.6056	53.4827	78.6815	69.0816	89.6544	138.175	64.8594	0.647747	-0.443366	1.09111	ACACA	chr17:35685584:-	chr17_37328646_-;chr17_37328705_-
chr17:29579730-29579814:mpeak_34778|chr17_29421944_29701030_NF1_NM_+|	13.8472	3.46967	0.959241	-3.6171	0.000297922	0.00655191	1.40245	11.5784	9.35947	2.62272	1.68492	0.964026	19.6342	11.5784	9.35947	39.3407	34.5408	24.1006	55.0633	5.38022	2.08332	-1.27203	3.35535	NF1	chr17:29579818:+	chr17_31252796_+
chr17:28252235-28252294:mpeak_34697|chr17_27959949_28257246_SSH2_NM_-|	22.6652	2.32453	0.747946	-3.10789	0.00188431	0.0225128	8.41467	7.71894	13.3707	7.86815	6.73967	8.19422	5.60978	28.3028	10.6965	59.4482	50.5475	65.0717	66.1396	13.0247	0.371762	-1.9725	2.34426	SSH2	chr17:28252209:-;chr17:28252239:-	chr17_29925212_-;chr17_29925252_-
chr17:26375888-26375957:mpeak_34498|chr17_26369687_26521607_NLK_NM_+|	36.2046	1.92432	0.80016	-2.40492	0.0161762	0.100787	5.60978	9.00543	37.4379	10.4909	16.0067	8.67623	18.2318	41.1677	38.7749	77.8072	85.9308	85.3163	53.021	14.1229	0.565482	-1.34304	1.90852	NLK	chr17:26375952:+	chr17_28048924_+
chr17:18195333-18195384:mpeak_34260|chr17_18178294_18218321_TOP3A_NM_-|	51.4541	3.20527	0.803848	-3.98741	6.67978e-05	0.00217184	8.41467	19.2974	0	2.62272	3.36983	2.41006	63.11	50.1731	42.7861	162.608	127.211	135.446	26.6343	1.97585	1.7216	-1.44618	3.16778	TOP3A	chr17:18195329:-	-
chr17:17657932-17658003:mpeak_34205|chr17_17584786_17713283_RAI1_NM_+|	68.8674	4.61414	0.789926	-5.84124	5.18148e-09	8.94992e-07	0	10.2919	13.3707	6.99391	2.52738	6.26617	8.41467	23.1568	13.3707	224.679	272.957	244.381	78.9768	2.12764	0.58383	-4.04531	4.62914	RAI1	chr17:17657990:+	chr17_17754689_+
chr17:17588310-17588367:mpeak_34200|chr17_17584786_17713283_RAI1_NM_+|	73.1145	6.10546	0.580818	-10.5118	7.61959e-26	1.26348e-22	26.6465	18.0109	28.0784	6.11967	6.73967	4.82013	8.41467	23.1568	13.3707	224.679	272.957	244.381	161.843	2.38262	2.04059	-4.04531	6.0859	RAI1	chr17:17588364:+	chr17_17684998_+;chr17_17685049_+
chr17:1726246-1726321:mpeak_33366|chr17_1684733_1733175_SMYD4_NM_-|	42.1278	3.31123	0.566469	-5.84538	5.05406e-09	8.91557e-07	12.622	11.5784	13.3707	4.37119	7.58213	9.15825	16.8293	24.4433	24.0672	141.627	124.684	115.201	57.501	5.53366	0.831589	-2.54569	3.37728	SMYD4	chr17:1726244:-	chr17_1822955_-
chr17:1724439-1724505:mpeak_33365|chr17_1684733_1733175_SMYD4_NM_-|	46.9554	3.91282	0.528918	-7.39778	1.38475e-13	6.37831e-11	29.4513	34.7352	20.056	6.11967	15.1643	11.0863	16.8293	24.4433	24.0672	141.627	124.684	115.201	128.93	8.48473	1.37988	-2.54569	3.92557	SMYD4	chr17:1724451:-	chr17_1821161_-
chr17:17207400-17207505:mpeak_34184|chr17_17206679_17250118_NT5M_NM_+|	19.7589	1.38227	0.607002	-2.27721	0.0227734	0.126721	43.4758	34.7352	45.4603	12.2393	21.9039	13.0143	11.2196	9.00543	13.3707	11.3651	9.26704	12.0503	368.117	144.29	1.39095	0.0397581	1.35119	NT5M	chr17:17207411:+;chr17:17207453:+;chr17:17207481:+	chr17_17304096_+;chr17_17304160_+
chr17:17000595-17000655:mpeak_34154|chr17_16946073_17088136_MPRIP_NM_+|	83.0889	2.77693	0.520087	-5.33935	9.3279e-08	1.0176e-05	14.0245	30.8758	32.0896	6.11967	7.58213	4.33812	124.818	128.649	101.617	201.949	187.868	157.136	21.6822	3.29825	2.09348	-0.623259	2.71673	MPRIP	chr17:17000653:+	-
chr17:17000135-17000206:mpeak_34152|chr17_16946073_17088136_MPRIP_NM_+|	78.8073	2.65599	1.0634	-2.49765	0.0125021	0.0846161	29.4513	3.85947	1.33707	2.62272	5.89721	0.482013	124.818	128.649	101.617	201.949	187.868	157.136	9.75767	1.64583	1.94446	-0.623259	2.56772	MPRIP	chr17:17000207:+	chr17_17096892_+
chr16:9205860-9205996:mpeak_30298|chr16_9185536_9210524_C16orf72_NM_+|	144.828	2.35039	0.454047	-5.17654	2.26036e-07	2.17914e-05	65.9149	81.0489	123.01	107.531	134.793	127.251	29.4513	42.4542	65.5163	285.876	362.257	312.826	196.456	38.4591	-0.453051	-2.80586	2.35281	C16orf72	chr16:9205889:+;chr16:9205915:+;chr16:9205958:+;chr16:9206000:+	chr16_9112031_+;chr16_9112122_+
chr16:9205693-9205833:mpeak_30297|chr16_9185536_9210524_C16orf72_NM_+|	104.98	2.40762	0.502379	-4.79243	1.64777e-06	0.000112906	18.2318	30.8758	20.056	29.7241	37.9106	24.5827	29.4513	42.4542	65.5163	285.876	362.257	312.826	50.3294	9.59639	-0.415027	-2.80586	2.39084	C16orf72	chr16:9205757:+	chr16_9111899_+
chr16:9200560-9200626:mpeak_30294|chr16_9185536_9210524_C16orf72_NM_+|	108.537	2.0846	0.493213	-4.22658	2.37268e-05	0.000984104	15.4269	34.7352	26.7413	36.718	48.0201	42.4171	29.4513	42.4542	65.5163	285.876	362.257	312.826	55.9616	13.2321	-0.725471	-2.80586	2.08039	C16orf72	chr16:9200621:+	chr16_9106716_+;chr16_9106761_+
chr16:9199065-9199171:mpeak_30291|chr16_9185536_9210524_C16orf72_NM_+|	96.212	2.41041	0.671298	-3.59067	0.000329824	0.0069938	1.40245	10.2919	12.0336	11.3651	14.3218	6.74818	29.4513	42.4542	65.5163	285.876	362.257	312.826	17.2665	3.37528	-0.450966	-2.80586	2.3549	C16orf72	chr16:9199125:+;chr16:9199163:+	chr16_9105304_+
chr16:90088487-90088620:mpeak_33210|chr16_90086036_90109603_GAS8_NM_+|	45.6617	1.18615	0.492866	-2.40664	0.0161002	0.100441	54.6954	66.8975	56.1568	39.3407	47.1777	29.8848	21.0367	47.6001	33.4267	43.7119	63.1844	44.8272	174.156	76.7206	0.610716	-0.571978	1.18269	GAS8	chr16:90088570:+;chr16:90088598:+	chr16_90022189_+
chr16:90051008-90051118:mpeak_33202|chr16_90038987_90066856_AFG3L1P_NR_+|	17.2766	4.49495	1.36275	-3.29845	0.000972196	0.0145759	36.4636	38.5947	38.7749	18.359	32.0134	31.3308	0	0	0	6.11967	0.842459	4.82013	#DIV/0!	693.443	0.478456	-Inf	Inf	AFG3L1P	chr16:90051110:+	chr16_89984701_+
chr16:90025619-90025797:mpeak_33193|chr16_90015138_90032268_DEF8_NM_+|	154.674	2.15439	0.46312	-4.65191	3.28878e-06	0.000193385	311.343	400.099	397.109	95.292	144.06	157.618	43.4758	61.7515	29.4155	57.6997	92.6704	65.5538	823.327	183.847	1.48157	-0.681386	2.16296	DEF8	chr16:90025774:+	chr16_89959275_+;chr16_89959311_+
chr16:89493017-89493092:mpeak_33103|chr16_89353521_89556969_ANKRD11_NR_-mpeak_33103|chr16_89335071_89556969_ANKRD11_NM_-||	30.723	3.64785	0.661248	-5.51662	3.45584e-08	4.40805e-06	14.0245	16.7244	17.3819	5.24543	12.6369	8.67623	4.20734	19.2974	13.3707	70.8133	95.1978	91.1004	130.523	10.3296	0.857781	-2.80167	3.65945	ANKRD11	chr16:89493014:-;chr16:89493039:-	chr16_89426609_-
chr16:89458047-89458098:mpeak_33102|chr16_89353521_89556969_ANKRD11_NR_-mpeak_33102|chr16_89335071_89556969_ANKRD11_NM_-||	26.5569	5.07565	0.963016	-5.27057	1.35997e-07	1.38037e-05	9.81712	3.85947	6.68533	0	3.36983	0.964026	4.20734	19.2974	13.3707	70.8133	95.1978	91.1004	55.2182	2.52839	2.23215	-2.80167	5.03381	ANKRD11	chr16:89458062:-	chr16_89391652_-
chr16:89367733-89367802:mpeak_33090|chr16_89353521_89556969_ANKRD11_NR_-mpeak_33090|chr16_89335071_89556969_ANKRD11_NM_-||	26.3453	2.04161	1.01907	-2.00341	0.0451336	0.203775	0	5.14596	2.67413	6.99391	5.89721	1.44604	4.20734	19.2974	13.3707	70.8133	95.1978	91.1004	31.8102	5.57624	-0.874501	-2.80167	1.92716	ANKRD11	chr16:89367748:-	chr16_89301342_-
chr16:89356455-89356510:mpeak_33085|chr16_89353521_89556969_ANKRD11_NR_-mpeak_33085|chr16_89335071_89556969_ANKRD11_NM_-||	29.9899	2.57085	0.836364	-3.07384	0.0021132	0.0240666	9.81712	15.4379	5.34827	3.49695	16.8492	14.9424	4.20734	19.2974	13.3707	70.8133	95.1978	91.1004	82.9911	13.725	-0.205513	-2.80167	2.59615	ANKRD11	chr16:89356459:-	chr16_89290051_-
chr16:88987673-88987765:mpeak_33039|chr16_88943683_89043504_CBFA2T3_NM_-|	191.109	1.13193	0.475167	-2.38218	0.0172103	0.105074	23.8416	14.1514	10.6965	13.9878	11.7944	15.9064	258.05	213.557	284.795	538.531	381.634	526.358	6.43698	2.88199	0.223956	-0.935363	1.15932	CBFA2T3	chr16:88987679:-	chr16_88921272_-
chr16:87986050-87986372:mpeak_32965|chr16_87985037_88110195_BANP_NM_+|	104.231	2.8277	0.506319	-5.58481	2.33957e-08	3.23289e-06	21.0367	46.3137	42.7861	52.4543	51.39	28.4388	40.6709	37.3082	29.4155	268.391	346.25	286.316	102.553	14.6825	-0.264336	-3.06854	2.8042	BANP	chr16:87986242:+;chr16:87986354:+	chr16_87952762_+
chr16:85113296-85113453:mpeak_32844|chr16_85061356_85121881_KIAA0513_NM_+|	53.7988	2.23702	0.59878	-3.73596	0.000187001	0.00461368	22.4391	63.038	41.4491	79.5557	69.0816	86.2803	5.60978	15.4379	8.0224	79.5557	75.8213	99.2947	436.622	92.2433	-0.888165	-3.13103	2.24287	KIAA0513	chr16:85113360:+;chr16:85113425:+	chr16_85079773_+;chr16_85079832_+
chr16:84522788-84522840:mpeak_32796|chr16_84513632_84538288_TLDC1_NM_-|	42.1631	2.0669	0.785949	-2.62982	0.00854312	0.0653423	5.60978	12.8649	4.0112	3.49695	6.73967	1.44604	79.9394	37.3082	40.112	104.034	98.5677	111.827	14.2895	3.71552	0.944651	-0.998669	1.94332	TLDC1	chr16:84522786:-	chr16_84489182_-
chr16:84482687-84482744:mpeak_32782|chr16_84402128_84497219_ATP2C2_NM_+|	25.6724	2.1939	0.996171	-2.20233	0.027642	0.145603	0	11.5784	12.0336	3.49695	1.68492	0.482013	46.2807	66.8975	28.0784	43.7119	37.9106	55.9135	25.0735	4.11811	2.05966	0.0385083	2.02115	ATP2C2	chr16:84482742:+	chr16_84449136_+
chr16:69418425-69418596:mpeak_32185|chr16_69390959_69419891_TERF2_NM_-|	71.9525	2.47662	0.701253	-3.5317	0.000412893	0.00813135	14.0245	7.71894	4.0112	7.86815	5.05475	2.89208	36.4636	68.184	88.2464	208.069	206.402	214.496	13.3517	2.51444	0.703539	-1.70518	2.40871	TERF2	chr16:69418527:-	-
chr16:69418108-69418172:mpeak_32184|chr16_69390959_69419891_TERF2_NM_-|	71.1232	3.26727	1.08943	-2.99906	0.00270815	0.0284218	1.40245	21.8703	0	4.37119	2.52738	1.44604	36.4636	68.184	88.2464	208.069	206.402	214.496	18.0976	1.32672	1.47973	-1.70518	3.1849	TERF2	chr16:69418112:-	chr16_69384213_-
chr16:69413013-69413105:mpeak_32182|chr16_69390959_69419891_TERF2_NM_-|	88.9523	3.706	0.477489	-7.76145	8.39637e-15	4.09496e-12	71.5247	48.8866	76.2128	14.8621	17.6916	16.3884	36.4636	68.184	88.2464	208.069	206.402	214.496	101.934	7.78135	2.00629	-1.70518	3.71147	TERF2	chr16:69413037:-	chr16_69379116_-
chr16:69404234-69404363:mpeak_32181|chr16_69390959_69419891_TERF2_NM_-|	78.4818	1.50852	0.519385	-2.90443	0.00367923	0.0357196	14.0245	18.0109	24.0672	16.6105	23.5888	23.6186	36.4636	68.184	88.2464	208.069	206.402	214.496	29.0846	10.1465	-0.185898	-1.70518	1.51928	TERF2	chr16:69404237:-;chr16:69404289:-	chr16_69370338_-;chr16_69370376_-
chr16:589810-589866:mpeak_29734|chr16_577855_603338_CAPN15_NM_+|	51.1912	2.19083	0.60422	-3.62589	0.000287973	0.00636689	30.8538	28.3028	6.68533	20.9817	10.952	14.4604	43.4758	39.8812	36.1008	108.406	150.8	123.395	55.1173	12.126	0.505066	-1.67934	2.18441	CAPN15	chr16:589861:+	chr16_539825_+;chr16_539860_+
chr16:547394-547458:mpeak_29725|chr16_475667_570725_RAB11FIP3_NM_+|	15.6157	1.6377	0.680296	-2.40733	0.0160698	0.100327	16.8293	24.4433	25.4043	20.1075	14.3218	12.0503	4.20734	11.5784	8.0224	15.7363	13.4793	21.2086	280.059	92.1772	0.52059	-1.08266	1.60325	RAB11FIP3	chr16:547448:+	chr16_497445_+
chr16:493989-494048:mpeak_29721|chr16_475667_570725_RAB11FIP3_NM_+|	9.70581	2.82514	1.01555	-2.78188	0.00540457	0.0474675	2.80489	12.8649	17.3819	0.874238	2.52738	5.78416	4.20734	11.5784	8.0224	15.7363	13.4793	21.2086	138.825	18.217	1.84725	-1.08266	2.92991	RAB11FIP3	chr16:494041:+	chr16_444041_+
chr16:400433-400564:mpeak_29708|chr16_338248_402676_AXIN1_NM_-|	25.8849	3.59236	0.72073	-4.98433	6.21759e-07	4.95674e-05	5.60978	10.2919	18.7189	4.37119	0.842459	3.8561	18.2318	23.1568	21.3931	57.6997	67.3967	79.0501	55.1445	4.44277	1.9325	-1.70119	3.63369	AXIN1	chr16:400432:-;chr16:400512:-	chr16_350513_-
chr16:3817627-3817925:mpeak_30122|chr16_3779875_3930121_CREBBP_NM_-|	52.5075	1.89466	0.653491	-2.89928	0.00374015	0.0361417	22.4391	9.00543	24.0672	34.0953	24.4313	29.8848	21.0367	11.5784	37.4379	106.657	187.026	122.431	79.2426	21.2469	-0.671439	-2.57046	1.89902	CREBBP	chr16:3817627:-;chr16:3817673:-	chr16_3767628_-;chr16_3767672_-
chr16:3498585-3498667:mpeak_30082|chr16_3493667_3535466_NAA60_NM_+|	51.5604	1.29511	0.654758	-1.978	0.0479287	0.211034	11.2196	9.00543	13.3707	1.74848	4.21229	11.0863	71.5247	96.4868	70.8645	100.537	132.266	96.4026	14.0641	5.17824	0.978751	-0.462729	1.44148	NAA60	chr16:3498655:+	chr16_3448654_+
chr16:3336829-3336894:mpeak_30051|chr16_3333486_3339392_ZNF263_NM_+|	43.4157	1.27278	0.627109	-2.02959	0.0423977	0.195942	4.20734	23.1568	12.0336	34.0953	35.3833	29.4028	12.622	16.7244	25.4043	89.1723	135.636	103.151	71.9585	30.1505	-1.32758	-2.58257	1.25498	ZNF263	chr16:3336885:+	chr16_3286869_+
chr16:23090298-23090427:mpeak_30923|chr16_23080937_23160591_USP31_NM_-|	53.4136	2.16847	0.713646	-3.03857	0.00237702	0.0260686	7.01223	16.7244	5.34827	0.874238	2.52738	2.41006	109.391	113.211	90.9205	115.399	91.828	85.3163	9.27681	1.9866	2.32324	0.0999163	2.22333	USP31	chr16:23090300:-;chr16:23090358:-;chr16:23090385:-	chr16_23078981_-;chr16_23079056_-
chr16:22087324-22087485:mpeak_30865|chr16_22019455_22092016_C16orf52_NM_+|	44.3932	2.13973	0.834891	-2.56289	0.0103805	0.0747738	1.40245	16.7244	4.0112	6.99391	2.52738	4.82013	37.866	64.3245	28.0784	97.9147	146.588	121.467	16.9941	3.91874	0.626339	-1.49023	2.11657	C16orf52	chr16:22087380:+	chr16_22076089_+
chr16:18887258-18887339:mpeak_30694|chr16_18820968_18937726_SMG1_NM_-|	157.444	2.49689	0.638884	-3.90821	9.29816e-05	0.00275325	14.0245	7.71894	24.0672	1.74848	11.7944	4.33812	210.367	154.379	213.931	468.592	354.675	423.689	7.91645	1.43397	1.35725	-1.10758	2.46484	SMG1	chr16:18887264:-	-
chr16:1626717-1626769:mpeak_29809|chr16_1561151_1662109_IFT140_NM_-|	13.1062	3.88765	1.23916	-3.13733	0.00170496	0.0211932	2.80489	16.7244	5.34827	0	1.68492	0.482013	14.0245	14.1514	30.7525	20.1075	16.0067	35.1869	42.2166	4.55869	3.52112	-0.274963	3.79608	IFT140	chr16:1626716:-	chr16_1576718_-
chr16:14294437-14294581:mpeak_30489|chr16_14165169_14354765_MKL2_NM_+|	26.0644	3.87987	0.780601	-4.97036	6.68271e-07	5.2768e-05	19.6342	5.14596	12.0336	14.8621	5.05475	12.0503	5.60978	6.43245	5.34827	90.0465	75.8213	60.7336	211.689	14.1072	0.203657	-3.70379	3.90744	MKL2	chr16:14294558:+;chr16:14294586:+	-
chr16:11260739-11260878:mpeak_30361|chr16_11038344_11272191_CLEC16A_NM_+|	26.1996	2.40722	0.692312	-3.47708	0.000506914	0.00937081	18.2318	5.14596	18.7189	1.74848	6.73967	4.82013	36.4636	32.1623	26.7413	49.8316	66.5542	47.2373	44.1417	8.13349	1.66138	-0.778812	2.44019	CLEC16A	chr16:11260791:+;chr16:11260831:+;chr16:11260876:+;chr16:11260901:+	chr16_11166987_+;chr16_11167032_+
chr15:93543801-93543972:mpeak_29497|chr15_93443550_93567601_CHD2_NM_+|	19.6494	2.03568	0.896391	-2.27097	0.0231489	0.128208	9.81712	0	2.67413	2.62272	7.58213	5.78416	14.0245	12.8649	5.34827	53.3285	64.8693	56.8775	58.1211	9.13264	-0.356162	-2.44116	2.085	CHD2	chr15:93543956:+	chr15_93000726_+;chr15_93000764_+
chr15:91137084-91137221:mpeak_29423|chr15_91073117_91185163_CRTC3_NM_+|	15.0761	2.5271	0.763737	-3.30887	0.000936749	0.0142245	19.6342	12.8649	20.056	3.49695	9.26704	2.89208	8.41467	14.1514	20.056	16.6105	26.9587	26.5107	123.305	22.3403	1.74711	-0.7174	2.46451	CRTC3	chr15:91137139:+;chr15:91137214:+	chr15_90593902_+;chr15_90593995_+
chr15:86228021-86228110:mpeak_29265|chr15_85923846_86287858_AKAP13_NM_+|	23.2736	2.7665	0.932588	-2.96647	0.00301237	0.0308855	1.40245	15.4379	10.6965	30.5983	28.6436	23.6186	0	6.43245	1.33707	43.7119	68.2391	49.1653	236.281	51.429	-1.58932	-4.37413	2.78481	AKAP13	chr15:86228105:+	chr15_85684870_+
chr15:75805033-75805102:mpeak_28913|chr15_75761324_75871632_PTPN9_NM_-|	27.1177	1.75264	0.729211	-2.40348	0.01624	0.100946	19.6342	39.8812	32.0896	8.74238	23.5888	20.7266	16.8293	36.0217	8.0224	38.4665	40.438	40.9711	150.484	44.2607	0.787863	-0.977652	1.76552	PTPN9	chr15:75805037:-	chr15_75512678_-
chr15:75714694-75714753:mpeak_28907|chr15_75664550_75748124_SIN3A_NM_-|	23.4705	2.54903	0.87514	-2.91272	0.00358301	0.0350315	0	16.7244	10.6965	3.49695	10.1095	8.19422	8.41467	19.2974	13.3707	53.3285	65.7118	72.3019	100.118	11.3936	0.330904	-2.21955	2.55046	SIN3A	chr15:75714701:-	chr15_75422361_-
chr15:75713429-75713497:mpeak_28905|chr15_75664550_75748124_SIN3A_NM_-|	22.0056	4.23498	0.847419	-4.99751	5.80758e-07	4.73664e-05	5.60978	14.1514	5.34827	0.874238	4.21229	1.44604	8.41467	19.2974	13.3707	53.3285	65.7118	72.3019	61.1193	3.41408	1.94251	-2.21955	4.16206	SIN3A	chr15:75713435:-	chr15_75421097_-
chr15:66786331-66786722:mpeak_28555|chr15_66783055_66790146_SNAPC5_NM_-|	60.1309	3.05371	0.642878	-4.75007	2.0335e-06	0.00012969	140.245	150.519	152.426	72.5618	74.1364	64.5897	14.0245	0	0	15.7363	18.5341	18.7985	1053.37	398.139	1.06871	-1.91992	2.98864	SNAPC5	chr15:66786363:-;chr15:66786413:-;chr15:66786481:-;chr15:66786548:-;chr15:66786573:-;chr15:66786611:-;chr15:66786660:-	chr15_66494027_-;chr15_66494077_-;chr15_66494146_-;chr15_66494238_-;chr15_66494293_-
chr15:63421477-63421633:mpeak_28329|chr15_63413998_63433478_LACTB_NM_+|	28.2133	1.74907	0.807867	-2.16504	0.0303844	0.155889	9.81712	11.5784	10.6965	0.874238	7.58213	0	47.6831	64.3245	56.1568	44.5862	43.8078	41.4531	19.0837	9.76883	1.92411	0.373059	1.55105	LACTB	chr15:63421524:+;chr15:63421595:+;chr15:63421641:+	chr15_63129395_+
chr15:60739129-60739214:mpeak_28271|chr15_60715961_60771359_ICE2_NM_-|	25.931	2.44328	0.922779	-2.64774	0.0081031	0.0632163	0	7.71894	16.0448	0.874238	0.842459	2.41006	35.0611	51.4596	52.1456	49.8316	41.2805	53.5034	25.706	2.85361	2.52568	-0.0606044	2.58628	ICE2	chr15:60739128:-;chr15:60739165:-	chr15_60446931_-
chr15:56424926-56424998:mpeak_28122|chr15_56388818_56535483_RFX7_NM_-|	22.2543	3.13125	1.00163	-3.12616	0.00177104	0.0216574	0	15.4379	5.34827	0.874238	1.68492	5.78416	14.0245	21.8703	13.3707	52.4543	68.2391	67.9638	63.2882	4.42247	1.31693	-1.93712	3.25405	RFX7	chr15:56424938:-	chr15_56132729_-
chr15:56030313-56030557:mpeak_28090|chr15_55912464_56035317_PRTG_NM_-|	3.81178	4.75007	1.56107	-3.04282	0.00234373	0.0257376	7.01223	6.43245	8.0224	3.49695	5.05475	4.33812	0	0	0	1.74848	3.36983	6.26617	#DIV/0!	113.223	0.735894	-Inf	Inf	PRTG	chr15:56030317:-;chr15:56030417:-;chr15:56030499:-	chr15_55738122_-;chr15_55738206_-
chr15:45893506-45893674:mpeak_27639|chr15_45879416_45898592_BLOC1S6_NM_+|	67.3311	2.44079	0.55874	-4.36839	1.25168e-05	0.000564003	14.0245	27.0163	44.1232	8.74238	18.5341	14.4604	58.9027	77.1894	49.4715	164.357	183.656	147.496	45.8948	8.42303	1.02892	-1.417	2.44592	BLOC1S6	chr15:45893654:+	chr15_45601474_+
chr15:45893267-45893465:mpeak_27638|chr15_45879416_45898592_BLOC1S6_NM_+|	61.1732	3.4336	0.661479	-5.19079	2.09399e-07	2.0425e-05	25.244	6.43245	10.6965	4.37119	3.36983	2.89208	58.9027	77.1894	49.4715	164.357	183.656	147.496	22.8348	2.1459	1.99458	-1.417	3.41158	BLOC1S6	chr15:45893361:+	chr15_45601178_+
chr15:40862196-40862269:mpeak_27252|chr15_40861491_40865725_RPUSD2_NM_+|	23.6142	3.71313	1.06312	-3.49267	0.000478216	0.00897034	1.40245	14.1514	2.67413	15.7363	23.5888	15.4244	0	2.57298	2.67413	55.077	62.3419	87.7264	231.594	26.6882	-1.58669	-5.28898	3.70229	RPUSD2	chr15:40862266:+	chr15_40570064_+
chr15:34264255-34264312:mpeak_27073|chr15_34158929_34331303_AVEN_NM_-|	36.2863	2.01583	0.83677	-2.40907	0.0159933	0.100227	1.40245	11.5784	13.3707	6.11967	0	1.44604	75.732	64.3245	53.4827	77.8072	73.2939	56.8775	13.6156	5.4566	1.80034	-0.103809	1.90415	AVEN	chr15:34264260:-	chr15_33972061_-
chr15:32928327-32928386:mpeak_27051|chr15_32907344_32928457_ARHGAP11A_NM_+|	53.8596	2.57393	0.581546	-4.42601	9.59926e-06	0.000454786	11.2196	34.7352	33.4267	7.86815	10.952	16.8705	47.6831	55.3191	38.7749	111.028	131.424	147.014	55.9903	9.16398	1.15326	-1.45787	2.61113	ARHGAP11A	chr15:32928382:+	chr15_32636150_+;chr15_32636180_+
chr15:101904981-101905132:mpeak_29649|chr15_101845560_102030187_PCSK6_NM_-|	9.60837	2.95043	1.15158	-2.56208	0.0104047	0.0748834	8.41467	16.7244	29.4155	0	1.68492	7.23019	7.01223	3.85947	10.6965	7.86815	15.1643	7.23019	252.939	44.1888	2.61337	-0.488628	3.102	PCSK6	chr15:101905012:-;chr15:101905079:-	chr15_101364876_-
chr14:93753908-93754038:mpeak_26324|chr14_93709434_93799438_BTBD7_NM_-|	253.626	0.878913	0.447371	-1.96462	0.0494585	0.215821	15.4269	14.1514	12.0336	19.2332	25.2738	19.7625	242.623	310.044	215.268	636.446	695.028	838.221	5.41867	2.96215	-0.627139	-1.49844	0.871297	BTBD7	chr14:93753974:-	chr14_93287630_-
chr14:91850804-91850893:mpeak_26175|chr14_91739997_91884188_CCDC88C_NM_-|	62.1642	1.5471	0.63662	-2.43017	0.0150917	0.0961677	8.41467	10.2919	4.0112	7.86815	3.36983	4.82013	72.9271	56.6056	104.291	153.866	150.8	168.705	9.71577	3.39229	0.500521	-1.01755	1.51807	CCDC88C	chr14:91850773:-;chr14:91850807:-;chr14:91850838:-	-
chr14:75913430-75913558:mpeak_25826|chr14_75894508_75935992_JDP2_NM_+|	163.45	3.44119	0.523588	-6.57233	4.95347e-11	1.41618e-08	65.9149	72.0435	60.168	39.3407	30.3285	17.3525	86.9516	132.509	74.8757	443.239	606.57	332.107	67.313	6.29718	1.18697	-2.23113	3.41811	JDP2	chr14:75913549:+	chr14_75446864_+
chr14:75912185-75912240:mpeak_25824|chr14_75894508_75935992_JDP2_NM_+|	142.129	2.23357	0.724946	-3.08102	0.00206295	0.0238548	7.01223	2.57298	5.34827	4.37119	4.21229	5.78416	86.9516	132.509	74.8757	443.239	606.57	332.107	5.07362	1.03969	0.0557267	-2.23113	2.28686	JDP2	chr14:75912238:+	chr14_75445532_+
chr14:72041753-72041812:mpeak_25568|chr14_71996028_72205734_SIPA1L1_NM_+|	42.1485	2.05759	0.686035	-2.99925	0.00270641	0.0284218	11.2196	19.2974	14.7077	0.874238	4.21229	4.82013	49.0856	95.2003	84.2352	62.9452	96.0403	63.1437	19.7901	4.45987	2.19064	0.0409286	2.14971	SIPA1L1	chr14:72041808:+	chr14_71575089_+
chr14:70235920-70236233:mpeak_25477|chr14_70233828_70237910_SRSF5_NM_+|	354.709	2.24617	0.480983	-4.66997	3.01246e-06	0.000180988	21.0367	43.7407	21.3931	27.9756	33.6983	26.5107	169.696	299.752	232.65	980.021	1355.52	1044.52	12.2733	2.60897	-0.0333354	-2.2673	2.23397	SRSF5	chr14:70236069:+;chr14:70236122:+;chr14:70236157:+;chr14:70236226:+	chr14_69769355_+;chr14_69769404_+;chr14_69769508_+
chr14:70234850-70235004:mpeak_25475|chr14_70233828_70237910_SRSF5_NM_+|	356.808	1.98418	0.644727	-3.07754	0.00208713	0.0239011	36.4636	27.0163	26.7413	55.9513	10.952	42.4171	169.696	299.752	232.65	980.021	1355.52	1044.52	12.8502	3.23427	-0.277024	-2.2673	1.99028	SRSF5	chr14:70235000:+	chr14_69768217_+;chr14_69768261_+
chr14:68226366-68226424:mpeak_25397|chr14_68215356_68283306_ZFYVE26_NM_-|	7.98101	3.08455	1.22627	-2.51538	0.0118903	0.0819469	2.80489	19.2974	9.35947	4.37119	1.68492	6.26617	2.80489	9.00543	0	8.74238	12.6369	18.7985	177.594	30.6694	1.35233	-1.76635	3.11868	ZFYVE26	chr14:68226369:-	chr14_67759653_-
chr14:58930671-58930798:mpeak_25017|chr14_58894102_59014498_KIAA0586_NM_+|	26.8111	2.5079	1.14811	-2.18437	0.0289348	0.150406	126.22	18.0109	17.3819	46.3346	12.6369	26.0287	4.20734	2.57298	12.0336	25.3529	12.6369	18.3165	859.007	150.96	0.927003	-1.5815	2.5085	KIAA0586	chr14:58930799:+	-
chr14:55765772-55765943:mpeak_24874|chr14_55738020_55817098_FBXO34_NM_+|	38.0046	3.33397	0.632648	-5.26987	1.36522e-07	1.38037e-05	42.0734	37.3082	42.7861	28.8499	23.5888	18.3165	9.81712	10.2919	18.7189	98.7889	38.7531	86.7623	314.638	31.5443	0.787955	-2.53029	3.31824	FBXO34	chr14:55765944:+	chr14_55299219_+
chr14:51258764-51258818:mpeak_24645|chr14_51190390_51297839_NIN_NM_-|	12.8305	3.1239	0.91608	-3.41007	0.000649452	0.0110704	8.41467	5.14596	9.35947	0.874238	2.52738	4.82013	2.80489	16.7244	8.0224	34.0953	30.3285	30.8488	83.1895	8.6297	1.4791	-1.78992	3.26902	NIN	chr14:51258764:-	chr14_50792047_-
chr14:50146106-50146399:mpeak_24529|chr14_50110388_50155098_POLE2_NM_-|	42.2596	2.06271	0.719249	-2.86787	0.00413251	0.0388906	65.9149	100.346	136.381	32.3468	68.2391	40.9711	1.40245	9.00543	10.6965	17.4848	11.7944	12.5323	1434.02	338.56	1.09623	-0.986356	2.08258	POLE2	chr14:50146190:-;chr14:50146246:-;chr14:50146283:-;chr14:50146339:-	chr14_49679474_-;chr14_49679545_-
chr14:38063036-38063146:mpeak_24348|chr14_38061916_38064325_FOXA1_NM_-|	147.706	4.84632	0.545622	-8.8822	6.55527e-19	5.43498e-16	9.81712	11.5784	9.35947	5.24543	9.26704	7.23019	33.6587	25.7298	21.3931	521.92	601.515	515.754	38.0718	1.32643	0.500292	-4.34281	4.8431	FOXA1	chr14:38063034:-;chr14:38063061:-	chr14_37593831_-;chr14_37593872_-
chr14:31789290-31789383:mpeak_24117|chr14_31762818_31889788_HEATR5A_NM_-|	141.448	1.63797	0.575172	-2.84779	0.00440242	0.0409657	490.856	337.06	300.84	164.357	173.546	150.388	18.2318	11.5784	4.0112	17.4848	19.3765	9.64026	3337.4	1050.05	1.20892	-0.459343	1.66826	HEATR5A	chr14:31789323:-	-
chr14:23754303-23754364:mpeak_23893|chr14_23746396_23755309_HOMEZ_NM_-|	27.3811	4.34084	0.766	-5.6669	1.45404e-08	2.11499e-06	14.0245	36.0217	22.7301	6.99391	16.8492	22.6546	4.20734	5.14596	5.34827	60.3224	68.2391	66.0358	495.024	23.8943	0.64631	-3.72645	4.37276	HOMEZ	chr14:23754309:-	chr14_23285102_-
chr14:21975974-21976115:mpeak_23800|chr14_21966513_21979517_METTL3_NM_-|	27.8828	1.70671	0.703393	-2.4264	0.0152494	0.0968035	7.01223	14.1514	10.6965	2.62272	3.36983	7.71221	32.2562	45.0272	37.4379	72.5618	63.1844	38.561	27.7718	7.86242	1.21708	-0.603499	1.82058	METTL3	chr14:21975979:-;chr14:21976063:-	chr14_21507837_-;chr14_21507920_-
chr14:21955967-21956056:mpeak_23792|chr14_21945334_21964703_TOX4_NM_+|	189.865	1.49814	0.66563	-2.25071	0.0244036	0.132608	7.01223	16.7244	34.7637	7.86815	3.36983	15.4244	283.294	333.201	316.885	389.036	442.291	428.51	6.26758	2.11634	1.13364	-0.4327	1.56634	TOX4	chr14:21956045:+	chr14_21487862_+;chr14_21487897_+
chr14:105484209-105484268:mpeak_26837|chr14_105478272_105487425_CDCA4_NM_-|	30.5327	2.04337	0.976447	-2.09266	0.0363797	0.177158	0	7.71894	6.68533	7.86815	12.6369	4.82013	2.80489	25.7298	12.0336	79.5557	98.5677	107.971	53.2594	8.85203	-0.814074	-2.81807	2.00399	CDCA4	chr14:105484210:-;chr14:105484261:-	chr14_105017875_-
chr14:104152506-104152572:mpeak_26767|chr14_104095524_104167537_KLC1_NM_+|	319.123	2.00799	0.373845	-5.37117	7.8227e-08	8.76459e-06	733.479	778.327	637.781	327.839	367.312	348.013	54.6954	92.6273	68.1904	100.537	176.074	144.604	997.427	247.656	1.04309	-0.966782	2.00987	KLC1	chr14:104152562:+	chr14_103686154_+;chr14_103686224_+
chr14:102302822-102302911:mpeak_26577|chr14_102228134_102391477_PPP2R5C_NM_+|	95.1825	1.45468	0.464737	-3.13011	0.00174742	0.0214353	18.2318	32.1623	29.4155	10.4909	5.05475	14.9424	154.269	181.395	156.437	182.716	171.019	186.057	16.2181	5.6481	1.38832	-0.133449	1.52177	PPP2R5C	chr14:102302895:+	chr14_101836519_+;chr14_101836570_+
chr14:102290700-102290814:mpeak_26576|chr14_102228134_102391477_PPP2R5C_NM_+|	89.1327	2.634	0.712212	-3.69834	0.000217018	0.0051262	2.80489	14.1514	16.0448	0	0.842459	3.8561	154.269	181.395	156.437	182.716	171.019	186.057	6.70616	1.30566	2.81222	-0.133449	2.94567	PPP2R5C	chr14:102290803:+	chr14_101824461_+
chr14:102233302-102233390:mpeak_26573|chr14_102228134_102391477_PPP2R5C_NM_+|	128.936	1.19102	0.384653	-3.09635	0.00195921	0.0230702	113.598	159.525	74.8757	52.4543	58.9721	55.9135	154.269	181.395	156.437	182.716	171.019	186.057	70.7169	31.0008	1.0563	-0.133449	1.18975	PPP2R5C	chr14:102233358:+;chr14:102233386:+	chr14_101767048_+
chr14:102232824-102232886:mpeak_26572|chr14_102228134_102391477_PPP2R5C_NM_+|	104.354	1.12612	0.397121	-2.83571	0.00457245	0.0421225	37.866	56.6056	50.8085	25.3529	32.8559	16.8705	154.269	181.395	156.437	182.716	171.019	186.057	29.5224	13.9089	0.952351	-0.133449	1.0858	PPP2R5C	chr14:102232884:+	chr14_101766545_+
chr14:102232534-102232686:mpeak_26571|chr14_102228134_102391477_PPP2R5C_NM_+|	89.3405	2.02185	0.595981	-3.39248	0.000692631	0.0116483	14.0245	9.00543	9.35947	2.62272	0.842459	4.33812	154.269	181.395	156.437	182.716	171.019	186.057	6.58185	1.44561	2.05337	-0.133449	2.18681	PPP2R5C	chr14:102232689:+	-
chr14:102231615-102231816:mpeak_26570|chr14_102228134_102391477_PPP2R5C_NM_+|	95.0583	1.41124	0.535495	-2.63539	0.0084041	0.0646225	19.6342	39.8812	18.7189	6.11967	7.58213	16.8705	154.269	181.395	156.437	182.716	171.019	186.057	15.898	5.66371	1.35558	-0.133449	1.48903	PPP2R5C	chr14:102231676:+;chr14:102231811:+	chr14_101765338_+;chr14_101765474_+
chr13:79197852-79197914:mpeak_23144|chr13_79191257_79233314_RNF219_NM_-|	22.7057	3.13878	1.45153	-2.16239	0.030588	0.156546	4.20734	16.7244	0	0	1.68492	15.9064	8.41467	6.43245	12.0336	55.077	69.0816	82.9062	116.803	12.7434	0.250825	-2.94544	3.19626	RNF219	chr13:79197854:-	chr13_78623720_-
chr13:46039894-46039952:mpeak_22640|chr13_46039029_46108836_COG3_NM_+|	26.4023	2.62144	0.660853	-3.96675	7.28579e-05	0.00230918	12.622	33.4488	26.7413	8.74238	13.4793	17.3525	8.41467	24.4433	13.3707	49.8316	57.2872	51.0934	157.504	25.0134	0.879618	-1.775	2.65462	COG3	chr13:46039949:+	chr13_45465818_+
chr13:42640805-42640858:mpeak_22506|chr13_42614171_42803234_DGKH_NM_+|	45.2856	3.31421	0.662473	-5.00278	5.65093e-07	4.73251e-05	5.60978	12.8649	18.7189	10.4909	5.05475	3.37409	35.0611	29.5893	20.056	141.627	118.787	142.194	43.9089	4.6993	0.975166	-2.24883	3.224	DGKH	chr13:42640859:+	chr13_42066722_+
chr13:42616225-42616362:mpeak_22502|chr13_42614171_42803234_DGKH_NM_+|	42.9106	1.70221	0.802421	-2.12134	0.0338932	0.169079	4.20734	0	6.68533	9.61662	4.21229	2.89208	35.0611	29.5893	20.056	141.627	118.787	142.194	19.289	4.15318	-0.618303	-2.24883	1.63053	DGKH	chr13:42616349:+	chr13_42042222_+
chr13:27648906-27649047:mpeak_22066|chr13_27643521_27746033_USP12_NM_-|	147.249	3.04215	0.54901	-5.54115	3.00491e-08	4.02022e-06	15.4269	16.7244	8.0224	2.62272	8.42459	3.8561	154.269	115.784	161.785	433.622	447.346	399.107	9.30295	1.16426	1.43061	-1.56767	2.99827	USP12	chr13:27648908:-;chr13:27648935:-;chr13:27648995:-	chr13_27074772_-;chr13_27074860_-
chr13:115087811-115087918:mpeak_23607|chr13_115079964_115089262_CHAMP1_NM_+|	30.494	4.39417	0.901524	-4.87416	1.09271e-06	7.94707e-05	39.2685	23.1568	37.4379	1.74848	9.26704	17.8345	14.0245	3.85947	14.7077	87.4238	39.5956	77.6041	306.407	14.0991	1.79138	-2.6504	4.44178	CHAMP1	chr13:115087863:+;chr13:115087916:+	chr13_114322387_+;chr13_114322486_+
chr13:114797549-114797673:mpeak_23593|chr13_114748833_114898095_RASA3_NM_-|	24.0874	1.43333	0.71421	-2.00687	0.0447633	0.202881	14.0245	41.1677	41.4491	20.9817	22.7464	18.7985	9.81712	25.7298	12.0336	27.9756	17.6916	36.633	203.111	75.9738	0.628168	-0.790525	1.41869	RASA3	chr13:114797552:-	chr13_114032078_-
chr12:98929348-98929432:mpeak_20099|chr12_98909350_98941350_TMPO_NM_+|	491.834	1.0896	0.365378	-2.98212	0.00286258	0.0297335	363.233	644.532	586.972	310.355	433.866	344.157	405.307	513.31	394.435	575.249	669.755	660.84	121.453	57.1074	0.551139	-0.537506	1.08865	TMPO	chr12:98929407:+	chr12_98535573_+;chr12_98535627_+
chr12:98925554-98925690:mpeak_20094|chr12_98909350_98941350_TMPO_NM_+|	320.614	1.30542	0.380408	-3.43162	0.000599993	0.0106067	100.976	108.065	187.189	65.5679	84.2459	82.4242	405.307	513.31	394.435	575.249	669.755	660.84	30.1763	12.1856	0.770737	-0.537506	1.30824	TMPO	chr12:98925617:+	-
chr12:79997951-79998026:mpeak_19747|chr12_79986473_80084790_PAWR_NM_-|	62.3565	1.70762	0.805633	-2.1196	0.0340399	0.169606	9.81712	1.28649	12.0336	7.86815	4.21229	3.37409	37.866	91.3408	97.6059	148.621	208.93	125.323	10.201	3.20053	0.582185	-1.09014	1.67233	PAWR	chr12:79997960:-	-
chr12:68718776-68718948:mpeak_19389|chr12_68689146_68726161_MDM1_NM_-|	10.2522	3.88781	1.30339	-2.98284	0.00285589	0.0297091	11.2196	27.0163	5.34827	7.86815	16.0067	8.19422	0	3.85947	0	14.8621	21.9039	6.74818	376.426	73.698	0.44262	-3.49501	3.93763	MDM1	chr12:68718785:-;chr12:68718884:-	chr12_68325007_-;chr12_68325108_-
chr12:65633961-65634021:mpeak_19291|chr12_65563350_65639941_LEMD3_NM_+|	47.2153	1.41329	0.573777	-2.46314	0.0137726	0.0903396	11.2196	9.00543	18.7189	42.8377	39.5956	58.3236	9.81712	11.5784	14.7077	123.268	93.5129	134	107.868	40.1268	-1.85373	-3.28037	1.42663	LEMD3	chr12:65634019:+	chr12_65240236_+
chr12:64615477-64615532:mpeak_19228|chr12_64581432_64616076_C12orf66_NM_-|	11.5203	3.06339	0.937236	-3.26854	0.00108105	0.0156328	12.622	18.0109	14.7077	7.86815	5.05475	14.4604	0	9.00543	1.33707	17.4848	19.3765	18.3165	292.261	49.6274	0.727508	-2.4155	3.14301	C12orf66	chr12:64615479:-	chr12_64221702_-
chr12:6440252-6440302:mpeak_16936|chr12_6438788_6451283_TNFRSF1A_NM_-|	131.1	6.51094	1.1459	-5.68196	1.3316e-08	2.00732e-06	1.40245	2.57298	17.3819	0.874238	2.52738	0.964026	5.60978	38.5947	37.4379	462.472	532.434	470.927	26.1596	0.297827	2.29046	-4.16626	6.45672	TNFRSF1A	chr12:6440250:-	chr12_6331086_-
chr12:6428086-6428162:mpeak_16933|chr12_6419601_6437301_PLEKHG6_NM_+|	9.60277	3.09097	1.36567	-2.26334	0.023615	0.129663	14.0245	7.71894	0	0.874238	2.52738	5.78416	11.2196	6.43245	0	18.359	22.7464	25.5467	123.178	13.7817	1.2431	-1.91682	3.15992	PLEKHG6	chr12:6428139:+	chr12_6318971_+
chr12:56481270-56481324:mpeak_18846|chr12_56473808_56495312_ERBB3_NM_+|	103.085	4.15488	0.757872	-5.48229	4.19854e-08	5.11913e-06	9.81712	3.85947	12.0336	1.74848	1.68492	0.964026	95.3663	100.346	116.325	288.499	280.539	325.841	8.23946	0.491399	2.54761	-1.51997	4.06758	ERBB3	chr12:56481328:+	chr12_56087543_+
chr12:56307533-56307676:mpeak_18814|chr12_56296139_56321697_WIBG_NM_-|	77.7155	4.81144	0.706904	-6.80636	1.00102e-11	3.31978e-09	40.6709	25.7298	52.1456	6.99391	25.2738	9.15825	16.8293	16.7244	38.7749	261.397	178.601	260.287	163.9	5.91557	1.51685	-3.2753	4.79215	WIBG	chr12:56307530:-;chr12:56307610:-	chr12_55913726_-;chr12_55913810_-;chr12_55913873_-
chr12:547512-547728:mpeak_16770|chr12_498515_550939_CCDC77_NM_+|	5.30896	3.63895	1.22678	-2.96625	0.00301456	0.0308855	5.60978	10.2919	6.68533	3.49695	4.21229	3.8561	0	1.28649	2.67413	5.24543	12.6369	7.71221	380.193	45.1868	0.965686	-2.69204	3.65772	CCDC77	chr12:547600:+;chr12:547728:+	chr12_438435_+;chr12_438562_+
chr12:53936667-53936726:mpeak_18647|chr12_53901811_54020199_ATF7_NR_-mpeak_18647|chr12_53911138_54020199_ATF7_NM_-||	26.2313	2.05179	0.623191	-3.2924	0.000993369	0.0148397	30.8538	55.3191	32.0896	15.7363	25.2738	19.7625	22.4391	12.8649	8.0224	38.4665	30.3285	23.6186	272.957	65.7615	0.9605	-1.09286	2.05336	ATF7	chr12:53936674:-	chr12_53542899_-
chr12:51874333-51874396:mpeak_18458|chr12_51785100_51901209_SLC4A8_NM_+|	10.6518	1.96688	0.948159	-2.07442	0.0380404	0.182413	21.0367	9.00543	25.4043	8.74238	9.26704	6.26617	12.622	2.57298	2.67413	6.99391	16.0067	7.23019	310.292	80.3008	1.19159	-0.758551	1.95014	SLC4A8	chr12:51874391:+	chr12_51480606_+
chr12:49718075-49718282:mpeak_18246|chr12_49716970_49725355_TROAP_NM_+|	89.9844	2.53877	0.501101	-5.06638	4.05444e-07	3.80063e-05	157.074	92.6273	223.29	51.5801	47.1777	37.115	44.8782	69.4705	62.8421	84.8011	91.828	117.129	266.939	46.2533	1.79956	-0.729325	2.52888	TROAP	chr12:49718115:+;chr12:49718160:+;chr12:49718197:+;chr12:49718265:+	chr12_49324393_+
chr12:48093308-48093519:mpeak_18106|chr12_48057373_48099844_RPAP3_NM_-|	48.907	1.22297	0.615136	-1.98813	0.0467973	0.208153	51.8905	84.9084	82.8981	22.7302	48.0201	38.561	26.6465	64.3245	28.0784	33.2211	59.8146	45.7912	184.543	78.7394	1.00707	-0.221726	1.2288	RPAP3	chr12:48093312:-;chr12:48093379:-;chr12:48093463:-	chr12_47699513_-;chr12_47699680_-
chr12:27113518-27113702:mpeak_17579|chr12_27091304_27117528_FGFR1OP2_NM_+|	126.365	0.809845	0.307402	-2.63449	0.00842649	0.0646291	124.818	123.503	106.965	79.5557	80.876	90.1364	109.391	156.952	139.055	173.973	180.286	150.87	87.6389	49.6047	0.503778	-0.317316	0.821095	FGFR1OP2	chr12:27113681:+	chr12_26960623_+;chr12_26960763_+
chr12:133310425-133310569:mpeak_21668|chr12_133304029_133338474_ANKLE2_NM_-|	71.4061	1.68467	0.415049	-4.05897	4.92894e-05	0.00177678	29.4513	37.3082	37.4379	31.4726	36.2257	24.5827	56.0978	70.757	46.7973	140.752	171.019	174.971	60.0036	18.9589	0.175215	-1.48696	1.66217	ANKLE2	chr12:133310445:-;chr12:133310515:-	chr12_132733863_-;chr12_132733930_-
chr12:133120117-133120231:mpeak_21636|chr12_133067156_133159556_FBRSL1_NM_+|	66.7697	1.7888	0.550297	-3.25062	0.00115155	0.0164018	19.6342	27.0163	10.6965	6.99391	15.1643	6.74818	71.5247	92.6273	101.617	165.231	129.739	154.244	21.5778	6.43487	0.988334	-0.757229	1.74556	FBRSL1	chr12:133120198:+	chr12_132543610_+
chr12:132419418-132419491:mpeak_21597|chr12_132413744_132428083_PUS1_NM_+|	92.4958	1.38204	0.562911	-2.45517	0.0140816	0.0915691	42.0734	63.038	61.5051	48.9573	42.1229	53.0214	36.4636	91.3408	117.662	141.627	176.916	235.222	67.8775	26.0222	0.209444	-1.17375	1.38319	PUS1	chr12:132419473:+	chr12_131934923_+
chr12:132199360-132199498:mpeak_21580|chr12_132195631_132283967_SFSWAP_NM_+|	69.0381	1.70656	0.485641	-3.51404	0.000441348	0.00854957	67.3174	65.611	76.2128	122.393	128.896	146.532	7.01223	15.4379	8.0224	48.0831	78.3486	64.5897	686.327	208.26	-0.927644	-2.64815	1.72051	SFSWAP	chr12:132199498:+	chr12_131714953_+
chr12:131304742-131304794:mpeak_21562|chr12_131276522_131323819_STX2_NM_-|	6.06965	3.67217	1.49102	-2.46285	0.0137836	0.0903396	1.40245	16.7244	6.68533	1.74848	0	0	5.60978	7.71894	13.3707	5.24543	7.58213	6.74818	92.9315	26.7956	3.82688	0.44774	3.37914	STX2	chr12:131304743:-	chr12_130820199_-
chr12:124197914-124197973:mpeak_21462|chr12_124196864_124242473_ATP6V0A2_NM_+|	53.9318	1.57551	0.549654	-2.86636	0.0041522	0.0390316	25.244	45.0272	26.7413	16.6105	21.0615	7.71221	91.1589	66.8975	57.4939	93.5435	100.253	95.4386	45.0069	15.6911	1.09598	-0.424216	1.5202	ATP6V0A2	chr12:124197966:+	chr12_123713418_+
chr12:12351828-12351890:mpeak_17223|chr12_12274354_12419811_LRP6_NM_-|	49.2849	3.41766	0.536918	-6.36533	1.94876e-10	4.25189e-08	36.4636	77.1894	82.8981	24.4787	32.0134	32.7769	18.2318	19.2974	14.7077	69.9391	81.7185	101.705	376.269	35.2337	1.13867	-2.27806	3.41674	LRP6	chr12:12351826:-	-
chr12:123460008-123460062:mpeak_21336|chr12_123459249_123463629_OGFOD2_NM_+|	90.1001	1.87307	0.699502	-2.67771	0.00741265	0.0592084	16.8293	2.57298	22.7301	4.37119	6.73967	2.89208	165.489	182.682	123.01	180.967	221.567	151.352	8.9419	2.52813	1.5892	-0.23331	1.82251	OGFOD2	chr12:123460058:+	chr12_122975511_+
chr12:122618637-122618712:mpeak_21226|chr12_122516633_122626237_MLXIP_NM_+|	95.7526	0.993212	0.500445	-1.98466	0.0471828	0.209125	11.2196	9.00543	13.3707	10.4909	10.1095	7.71221	120.61	137.654	153.763	187.961	238.416	248.719	8.15374	4.19386	0.246832	-0.712352	0.959184	MLXIP	chr12:122618711:+	chr12_122134163_+
chr12:122248835-122248912:mpeak_21197|chr12_122242637_122267971_SETD1B_NM_+|	175.969	3.09615	0.83069	-3.7272	0.000193616	0.00469377	4.20734	7.71894	6.68533	8.74238	10.952	7.71221	23.8416	27.0163	102.954	484.328	773.377	654.092	12.1002	1.43355	-0.558318	-3.63569	3.07737	SETD1B	chr12:122248907:+	chr12_121810995_+
chr12:112731373-112731424:mpeak_20752|chr12_112600327_112819896_HECTD4_NM_-|	13.0634	4.22743	1.14894	-3.67941	0.000233772	0.00541094	0	12.8649	8.0224	1.74848	0	1.44604	9.81712	14.1514	9.35947	34.0953	45.4928	19.7625	94.008	4.82309	2.70896	-1.57579	4.28475	HECTD4	chr12:112731372:-	chr12_112293570_-
chr12:111159608-111159976:mpeak_20658|chr12_111158970_111180783_PPP1CC_NM_-|	320.787	1.00158	0.279706	-3.58082	0.000342515	0.00718935	79.9394	75.9029	66.8533	35.8438	36.2257	40.9711	597.442	612.369	525.467	557.764	599.831	620.833	12.8334	6.35621	0.978232	-0.0354349	1.01367	PPP1CC	chr12:111159613:-;chr12:111159713:-	chr12_110721812_-;chr12_110721909_-
chr12:102295779-102295897:mpeak_20250|chr12_102271104_102314993_DRAM1_NM_+|	200.691	1.09704	0.36818	-2.97964	0.0028859	0.0299088	25.244	32.1623	46.7973	22.7302	25.2738	20.7266	349.209	302.325	282.121	413.515	418.702	469.481	11.1608	5.28007	0.600383	-0.479432	1.07981	DRAM1	chr12:102295891:+	chr12_101902110_+
chr12:102295279-102295338:mpeak_20249|chr12_102271104_102314993_DRAM1_NM_+|	229.317	0.876961	0.378699	-2.31572	0.0205735	0.118316	88.354	88.7678	117.662	48.9573	75.8213	96.8846	349.209	302.325	282.121	413.515	418.702	469.481	31.5731	17.0288	0.411288	-0.479432	0.89072	DRAM1	chr12:102295333:+	-
chr11:82869726-82869941:mpeak_15616|chr11_82868136_82895720_PCF11_NM_+|	58.1454	3.51745	0.612705	-5.74085	9.42003e-09	1.47361e-06	18.2318	42.4542	48.1344	42.8377	36.2257	40.4891	2.80489	14.1514	17.3819	163.483	145.745	125.805	316.908	27.4812	-0.135695	-3.66324	3.52755	PCF11	chr11:82869878:+;chr11:82869921:+	chr11_83158836_+;chr11_83158893_+
chr11:77897617-77897673:mpeak_15565|chr11_77885629_77899675_KCTD21_NM_-|	7.74963	4.27538	1.47537	-2.89783	0.00375748	0.0362669	5.60978	7.71894	0	0.874238	2.52738	7.23019	0	3.85947	0	20.9817	24.4313	19.7625	172.676	16.3126	0.326152	-4.07786	4.40401	KCTD21	chr11:77897622:-	chr11_78186577_-
chr11:77688332-77688518:mpeak_15550|chr11_77590173_77705717_INTS4_NM_-|	16.7501	3.10287	1.10065	-2.81914	0.00481525	0.0438951	1.40245	14.1514	18.7189	0.874238	2.52738	0	29.4513	38.5947	26.7413	17.4848	30.3285	20.7266	36.1575	7.44446	3.33277	0.467753	2.86502	INTS4	chr11:77688334:-;chr11:77688371:-	chr11_77977290_-;chr11_77977326_-
chr11:77524196-77524256:mpeak_15546|chr11_77378536_77531880_RSF1_NM_-|	14.9102	2.6524	0.809551	-3.27638	0.00105145	0.0154156	7.01223	20.5838	9.35947	5.24543	3.36983	3.8561	16.8293	5.14596	20.056	27.9756	32.0134	27.4747	87.9238	14.2589	1.56717	-1.05722	2.62439	RSF1	chr11:77524203:-	chr11_77813160_-
chr11:77402139-77402281:mpeak_15532|chr11_77378536_77531880_RSF1_NM_-|	15.5887	2.17539	0.98661	-2.20492	0.0274599	0.144921	12.622	1.28649	25.4043	8.74238	4.21229	5.30214	16.8293	5.14596	20.056	27.9756	32.0134	27.4747	93.5321	20.8736	1.10656	-1.05722	2.16378	RSF1	chr11:77402204:-	chr11_77691203_-
chr11:76503792-76503847:mpeak_15488|chr11_76493356_76506652_TSKU_NM_+|	73.9781	2.77234	0.88944	-3.11696	0.00182729	0.0220205	0	6.43245	10.6965	12.2393	11.7944	7.23019	19.6342	38.5947	5.34827	255.278	257.792	262.697	40.413	4.03007	-0.86806	-3.60904	2.74098	TSKU	chr11:76503845:+	chr11_76792798_+
chr11:73221724-73221863:mpeak_15331|chr11_73117789_73309234_FAM168A_NM_-|	72.0307	1.82852	0.638282	-2.86475	0.0041734	0.0391865	39.2685	19.2974	26.7413	8.74238	4.21229	21.2086	107.988	111.925	77.5499	163.483	153.327	130.626	28.6783	7.63534	1.32022	-0.588971	1.90919	FAM168A	chr11:73221777:-	-
chr11:68142819-68142901:mpeak_15032|chr11_68080076_68216276_LRP5_NM_+|	53.4123	1.27753	0.471088	-2.71188	0.00669033	0.0550839	53.2929	51.4596	37.4379	9.61662	19.3765	22.1726	71.5247	77.1894	86.9093	71.6875	83.4034	56.8775	60.3465	24.1384	1.47457	0.152634	1.32194	LRP5	chr11:68142891:+	chr11_68375422_+
chr11:67933180-67933279:mpeak_15017|chr11_67926638_67981239_SUV420H1_NM_-|	212.038	3.60806	0.448903	-8.03749	9.16952e-16	5.43032e-13	166.891	155.665	159.111	58.574	96.0403	92.5465	51.8905	81.0489	116.325	425.754	630.159	510.452	193.236	15.7793	0.962587	-2.65167	3.61426	SUV420H1	chr11:67933184:-;chr11:67933227:-	chr11_68165718_-;chr11_68165754_-
chr11:66799088-66799164:mpeak_14917|chr11_66790189_66816054_SYT12_NM_+|	118.702	2.13171	0.686824	-3.10372	0.00191104	0.0226026	23.8416	37.3082	16.0448	6.11967	7.58213	3.37409	352.014	222.563	114.988	209.817	211.457	219.316	11.1947	2.66565	2.17654	0.106283	2.07026	SYT12	chr11:66799152:+	chr11_67031680_+
chr11:66417299-66417449:mpeak_14878|chr11_66406087_66433326_RBM4_NM_+|	17.3172	1.4208	0.684866	-2.07456	0.0380273	0.182413	22.4391	20.5838	18.7189	6.11967	10.952	11.5683	22.4391	21.8703	8.0224	18.359	16.8492	29.8848	117.981	43.9985	1.10822	-0.314812	1.42303	RBM4	chr11:66417401:+	chr11_66649929_+
chr11:65154798-65154861:mpeak_14698|chr11_65154040_65178712_FRMD8_NM_+|	155.019	3.44889	0.833513	-4.13777	3.50691e-05	0.00135868	18.2318	2.57298	4.0112	6.11967	1.68492	2.41006	65.9149	138.941	133.707	384.665	503.79	598.178	7.3298	0.6871	1.28063	-2.13455	3.41518	FRMD8	chr11:65154857:+	chr11_65387389_+
chr11:651453-651508:mpeak_12974|chr11_644654_695754_DEAF1_NM_-|	28.9266	1.39927	0.694815	-2.01388	0.0440222	0.200764	5.60978	24.4433	20.056	13.1136	13.4793	6.26617	36.4636	36.0217	26.7413	38.4665	55.6023	70.8559	50.4996	19.9237	0.608781	-0.733008	1.34179	DEAF1	chr11:651454:-	-
chr11:59556619-59556701:mpeak_14276|chr11_59522531_59568327_STX3_NM_+|	236.653	1.96379	0.584395	-3.36038	0.000778364	0.0126043	15.4269	24.4433	30.7525	8.74238	5.89721	4.82013	307.135	594.359	446.58	360.186	585.509	455.984	5.23879	1.38832	1.85964	-0.0562561	1.9159	STX3	chr11:59556678:+	chr11_59789204_+
chr11:47765453-47765705:mpeak_14127|chr11_47739064_47788993_FNBP4_NM_-|	54.1558	1.3935	0.614454	-2.26787	0.0233369	0.128542	60.3051	34.7352	81.5611	73.436	106.992	112.309	9.81712	5.14596	18.7189	41.9634	58.1296	46.7553	524.32	199.347	-0.729109	-2.12428	1.39517	FNBP4	chr11:47765465:-;chr11:47765501:-	chr11_47743914_-;chr11_47744048_-
chr11:47761117-47761184:mpeak_14126|chr11_47739064_47788993_FNBP4_NM_-|	17.3848	2.65121	1.28943	-2.05611	0.0397715	0.188318	4.20734	11.5784	1.33707	0	0.842459	10.1223	9.81712	5.14596	18.7189	41.9634	58.1296	46.7553	50.8367	11.2001	0.64305	-2.12428	2.76733	FNBP4	chr11:47761132:-	-
chr11:33768288-33768378:mpeak_13799|chr11_33763630_33796071_FBXO3_NM_-|	27.9606	1.59353	0.696142	-2.28909	0.0220743	0.12394	14.0245	5.14596	14.7077	1.74848	5.89721	7.23019	37.866	34.7352	46.7973	66.4421	38.7531	62.1797	28.374	8.88776	1.18738	-0.487297	1.67468	FBXO3	chr11:33768306:-	chr11_33746725_-;chr11_33746790_-
chr11:33765567-33765725:mpeak_13796|chr11_33763630_33796071_FBXO3_NM_-|	28.5328	1.63355	0.656203	-2.4894	0.0127959	0.0860571	15.4269	14.1514	9.35947	1.74848	6.73967	8.19422	37.866	34.7352	46.7973	66.4421	38.7531	62.1797	32.6116	9.96707	1.22285	-0.487297	1.71014	FBXO3	chr11:33765565:-;chr11:33765633:-	chr11_33744021_-;chr11_33744086_-
chr11:33162957-33163267:mpeak_13763|chr11_33106835_33183037_CSTF3_NM_-|	92.7616	2.05002	0.515259	-3.97862	6.93153e-05	0.00222749	105.183	151.806	148.414	79.5557	81.7185	63.1437	19.6342	61.7515	65.5163	96.1662	122.156	118.093	275.969	66.7085	0.853172	-1.19539	2.04856	CSTF3	chr11:33162977:-;chr11:33163048:-;chr11:33163201:-	chr11_33141432_-;chr11_33141488_-;chr11_33141542_-
chr11:206800-206882:mpeak_12931|chr11_205667_207422_BET1L_NM_-|	41.7032	1.50391	0.469474	-3.20338	0.00135824	0.0183706	36.4636	28.3028	34.7637	25.3529	26.1162	16.8705	33.6587	36.0217	44.1232	66.4421	90.1431	62.1797	87.4578	31.2388	0.542411	-0.942835	1.48525	BET1L	chr11:206806:-	chr11_206790_-
chr11:18370245-18370383:mpeak_13535|chr11_18343815_18387329_GTF2H1_NM_+|	64.6393	1.86728	0.792479	-2.35625	0.0184605	0.11067	4.20734	10.2919	12.0336	3.49695	5.89721	0	82.7443	123.503	143.066	152.117	128.896	109.417	7.59572	3.60916	1.49794	-0.160544	1.65849	GTF2H1	chr11:18370378:+	chr11_18348829_+
chr11:126280482-126280533:mpeak_16632|chr11_126225539_126283855_ST3GAL4_NM_+|	67.0015	2.26886	0.915242	-2.47897	0.0131763	0.0877468	0	14.1514	5.34827	2.62272	1.68492	0.482013	161.281	137.654	85.5723	117.148	133.951	144.122	7.60699	1.21189	2.02546	-0.0396452	2.0651	ST3GAL4	chr11:126280535:+	chr11_126410638_+
chr11:118962381-118962557:mpeak_16424|chr11_118955586_118963819_HMBS_NM_+|	83.2523	1.36113	0.597088	-2.27961	0.022631	0.126013	8.41467	28.3028	6.68533	10.4909	7.58213	5.30214	150.062	132.509	118.999	173.973	176.916	179.791	10.8083	4.40475	0.892814	-0.402195	1.29501	HMBS	chr11:118962393:+;chr11:118962440:+;chr11:118962555:+	chr11_119091726_+;chr11_119091843_+
chr10:91393899-91393958:mpeak_11366|chr10_91344222_91405329_PANK1_NM_-|	48.6048	1.80099	0.575211	-3.13101	0.00174208	0.0214353	67.3174	70.757	34.7637	23.6044	26.9587	12.0503	42.0734	73.33	40.112	62.9452	58.9721	70.3739	111.139	32.5618	1.46488	-0.306236	1.77111	PANK1	chr10:91393907:-	chr10_89634151_-;chr10_89634183_-
chr10:82269968-82270042:mpeak_11175|chr10_82214037_82277660_TSPAN14_NM_+|	185.171	1.63632	0.431468	-3.79245	0.000149169	0.00382898	14.0245	18.0109	22.7301	6.11967	10.952	14.4604	225.794	262.444	254.043	461.598	456.613	475.265	7.378	2.26283	0.796449	-0.908651	1.7051	TSPAN14	chr10:82270026:+;chr10:82270056:+	chr10_80510286_+
chr10:75570440-75570500:mpeak_10978|chr10_75562334_75571589_NDST2_NM_-|	26.2853	6.44953	0.990009	-6.51461	7.28775e-11	1.83099e-08	42.0734	42.4542	32.0896	16.6105	10.952	20.7266	0	3.85947	0	42.8377	42.1229	61.6977	1007.19	32.9262	1.27201	-5.24791	6.51992	NDST2	chr10:75570445:-	chr10_73810691_-
chr10:63662674-63662733:mpeak_10520|chr10_63661012_63850620_ARID5B_NM_+|	38.862	3.07491	0.897037	-3.42785	0.000608377	0.0106415	4.20734	0	2.67413	5.24543	5.05475	5.30214	8.41467	3.85947	9.35947	152.117	142.376	127.733	47.7137	3.69525	-1.18097	-4.28667	3.1057	ARID5B	chr10:63662725:+	chr10_61902985_+
chr10:43622804-43623000:mpeak_10184|chr10_43572516_43623559_RET_NM_+|	213.14	1.33246	0.437675	-3.04441	0.00233138	0.0257041	556.771	437.407	530.815	238.667	301.6	307.524	40.6709	12.8649	24.0672	33.2211	34.5408	39.5251	1965.12	790.21	0.847021	-0.46729	1.31431	RET	chr10:43622916:+;chr10:43622952:+;chr10:43622988:+	chr10_43127464_+;chr10_43127504_+
chr10:43103533-43103592:mpeak_10163|chr10_43070126_43134285_ZNF33B_NR_-mpeak_10163|chr10_43090147_43134285_ZNF33B_NM_-||	25.7545	2.07044	0.603546	-3.43046	0.000602561	0.0106294	8.41467	19.2974	12.0336	3.49695	5.89721	7.23019	29.4513	25.7298	34.7637	51.5801	51.39	59.7696	44.1889	10.2153	1.2575	-0.855452	2.11295	ZNF33B	chr10:43103535:-	-
chr10:38329446-38329503:mpeak_10109|chr10_38299577_38343302_ZNF33A_NM_+|	79.8372	1.81205	0.580389	-3.12214	0.00179543	0.0217914	9.81712	3.85947	9.35947	4.37119	5.05475	6.26617	96.7687	73.33	93.5947	243.038	203.875	208.712	8.73593	2.39346	0.553854	-1.31401	1.86786	ZNF33A	chr10:38329503:+	-
chr10:34679943-34680008:mpeak_10048|chr10_34400490_35104253_PARD3_NM_-|	14.0472	2.56249	0.924397	-2.77206	0.00557024	0.0484097	8.41467	1.28649	1.33707	2.62272	3.36983	3.8561	8.41467	9.00543	5.34827	37.5922	36.2257	51.0934	48.4805	7.88451	0.16451	-2.4558	2.62031	PARD3	chr10:34679956:-	-
chr10:34632798-34632860:mpeak_10046|chr10_34400490_35104253_PARD3_NM_-|	20.7652	2.81219	0.68266	-4.11946	3.79769e-05	0.00143121	12.622	30.8758	13.3707	12.2393	16.0067	16.3884	8.41467	9.00543	5.34827	37.5922	36.2257	51.0934	249.769	35.7329	0.349469	-2.4558	2.80527	PARD3	chr10:34632803:-	chr10_34343862_-
chr10:34601184-34601249:mpeak_10042|chr10_34400490_35104253_PARD3_NM_-|	28.4549	1.93429	0.700729	-2.7604	0.00577301	0.0498065	18.2318	42.4542	18.7189	22.7302	46.3352	45.3092	8.41467	9.00543	5.34827	37.5922	36.2257	51.0934	348.751	91.5647	-0.526467	-2.4558	1.92933	PARD3	chr10:34601190:-	-
chr10:27456405-27456751:mpeak_9796|chr10_27443752_27475307_MASTL_NM_+|	37.5177	1.85167	0.631974	-2.92999	0.00338977	0.0335778	72.9271	83.6219	88.2464	35.8438	63.1844	28.4388	11.2196	7.71894	8.0224	18.359	21.0615	11.5683	907.964	249.99	0.941454	-0.919311	1.86076	MASTL	chr10:27456470:+;chr10:27456517:+;chr10:27456589:+;chr10:27456752:+	chr10_27167540_+;chr10_27167593_+;chr10_27167658_+;chr10_27167821_+
chr10:24834147-24834250:mpeak_9712|chr10_23983674_24834755_KIAA1217_NM_+|	19.0145	2.20619	0.74113	-2.97679	0.00291283	0.0301125	18.2318	19.2974	24.0672	18.359	19.3765	34.2229	2.80489	3.85947	8.0224	19.2332	26.9587	33.7409	419.4	90.0237	-0.22432	-2.44427	2.21995	KIAA1217	chr10:24834201:+;chr10:24834245:+	chr10_24545271_+;chr10_24545315_+;chr10_24545354_+
chr10:15830824-15830884:mpeak_9493|chr10_15821140_15902519_FAM188A_NM_-|	23.4085	2.5139	0.911735	-2.75727	0.0058286	0.0500777	5.60978	7.71894	9.35947	0.874238	1.68492	2.41006	29.4513	21.8703	57.4939	27.9756	58.1296	58.3236	20.8501	3.4406	2.19085	-0.408474	2.59932	FAM188A	chr10:15830827:-	chr10_15788829_-
chr10:134540765-134540859:mpeak_12882|chr10_134351352_134595540_INPP5A_NM_+|	91.2349	2.23689	0.44266	-5.0533	4.34248e-07	3.91342e-05	18.2318	12.8649	16.0448	15.7363	13.4793	11.5683	60.3051	65.611	74.8757	248.284	279.696	278.121	23.4778	5.05941	0.208996	-2.00526	2.21426	INPP5A	chr10:134540818:+;chr10:134540853:+	-
chr10:134166849-134166902:mpeak_12864|chr10_134150610_134180349_LRRC27_NR_+mpeak_12864|chr10_134145613_134188569_LRRC27_NM_+||	3.1809	4.94763	2.24443	-2.20441	0.0274957	0.145017	1.40245	14.1514	0	0	4.21229	4.82013	0	0	0	6.11967	5.05475	2.41006	#DIV/0!	99.7361	0.784086	-Inf	Inf	LRRC27	chr10:134166900:+	chr10_132353395_+
chr10:128608784-128608915:mpeak_12763|chr10_128593977_129249595_DOCK1_NM_+|	5.89765	2.46002	1.13751	-2.16263	0.0305697	0.156546	5.60978	14.1514	14.7077	4.37119	1.68492	4.82013	0	5.14596	4.0112	6.99391	2.52738	6.74818	250.943	66.8506	1.66412	-0.829194	2.49331	DOCK1	chr10:128608883:+	chr10_126920326_+
chr10:125779166-125779289:mpeak_12647|chr10_125769855_125853123_CHST15_NM_-|	27.3033	2.61221	0.815161	-3.20454	0.0013528	0.0183706	12.622	3.85947	4.0112	8.74238	6.73967	7.23019	9.81712	3.85947	22.7301	96.1662	73.2939	78.5681	56.2882	9.15712	-0.148362	-2.76823	2.61987	CHST15	chr10:125779169:-	chr10_124019652_-
chr10:125770872-125771029:mpeak_12646|chr10_125769855_125853123_CHST15_NM_-|	25.7492	2.74435	0.914652	-3.00044	0.00269593	0.0284014	4.20734	1.28649	6.68533	2.62272	5.89721	3.8561	9.81712	3.85947	22.7301	96.1662	73.2939	78.5681	33.4531	4.98977	-0.0231339	-2.76823	2.74509	CHST15	chr10:125770977:-	chr10_124011462_-
chr10:123727124-123727227:mpeak_12587|chr10_123716774_123734743_NSMCE4A_NM_-|	38.8603	1.8971	0.947145	-2.00297	0.0451808	0.203805	1.40245	5.14596	16.0448	3.49695	5.89721	3.8561	14.0245	55.3191	66.8533	73.436	122.999	97.8486	16.5886	4.50255	0.769868	-1.11151	1.88138	NSMCE4A	chr10:123727136:-;chr10:123727176:-	chr10_121967609_-;chr10_121967635_-;chr10_121967692_-
chr10:118673240-118673302:mpeak_12404|chr10_118646077_118886097_SHTN1_NM_-|	74.804	3.32402	0.898125	-3.70106	0.000214698	0.00511512	5.60978	20.5838	12.0336	0	2.52738	0.482013	194.94	163.384	141.729	94.4177	122.156	139.784	7.64463	1.26673	3.66706	0.488754	3.1783	SHTN1	chr10:118673247:-	-
chr10:11601496-11601569:mpeak_9314|chr10_11505848_11653788_USP6NL_NM_-|	10.7006	3.59592	1.22089	-2.94531	0.00322626	0.032423	1.40245	5.14596	18.7189	0.874238	6.73967	1.92805	1.40245	10.2919	5.34827	22.7302	31.171	22.6546	148.26	12.4641	1.40492	-2.16736	3.57228	USP6NL	chr10:11601513:-	chr10_11559515_-
chr10:102673590-102673650:mpeak_11889|chr10_102672325_102721633_FAM178A_NM_+|	46.0995	2.64594	0.655013	-4.03952	5.35607e-05	0.00186585	7.01223	19.2974	8.0224	8.74238	16.0067	7.23019	14.0245	30.8758	28.0784	145.124	144.903	123.877	47.0439	7.72626	0.102415	-2.50375	2.60616	FAM178A	chr10:102673643:+	chr10_100913885_+
chr1:87564057-87564130:mpeak_3179|chr1_87380334_87570152_HS2ST1_NM_+|	104.542	1.14386	0.528214	-2.16552	0.030348	0.155799	19.6342	45.0272	24.0672	6.99391	16.0067	10.1223	221.586	198.12	204.571	145.124	144.903	218.352	14.213	6.5154	1.42157	0.296284	1.12529	HS2ST1	chr1:87564109:+	chr1_87098441_+
chr1:85740086-85740180:mpeak_3131|chr1_85733665_85742587_BCL10_NM_-|	11.0898	2.97399	1.07678	-2.76194	0.00574596	0.0496765	0	6.43245	5.34827	2.62272	8.42459	4.82013	1.40245	5.14596	2.67413	26.2272	26.1162	43.8632	191.607	16.4931	-0.429641	-3.3829	2.95326	BCL10	chr1:85740129:-	chr1_85274389_-;chr1_85274447_-
chr1:6931887-6932115:mpeak_316|chr1_6845383_6947713_CAMTA1_NR_+mpeak_316|chr1_6845383_7826518_CAMTA1_NM_+||	69.0057	2.30086	0.602888	-3.8164	0.000135413	0.00359843	124.818	204.552	160.448	60.3224	98.5677	76.158	4.20734	6.43245	20.056	27.1014	19.3765	26.0287	1595.72	324.175	1.05929	-1.24007	2.29936	CAMTA1	chr1:6932023:+;chr1:6932080:+;chr1:6932109:+	chr1_6871981_+;chr1_6872045_+
chr1:47765867-47766003:mpeak_2387|chr1_47717594_47779819_STIL_NM_-|	40.1734	6.79332	1.34174	-5.06307	4.12568e-07	3.80067e-05	1.40245	10.2919	12.0336	0	0	0.482013	21.0367	37.3082	42.7861	112.777	139.848	104.115	23.4626	0.405348	5.62137	-1.81865	7.44002	STIL	chr1:47765868:-;chr1:47765950:-	chr1_47300197_-;chr1_47300281_-
chr1:45596444-45596497:mpeak_2246|chr1_45484988_45672250_ZSWIM5_NM_-|	6.32985	2.3328	1.11323	-2.09552	0.0361251	0.1766	4.20734	3.85947	2.67413	1.74848	3.36983	6.26617	1.40245	3.85947	2.67413	13.9878	19.3765	12.5323	135.344	24.8046	-0.083948	-2.5319	2.44795	ZSWIM5	chr1:45596444:-	chr1_45130772_-
chr1:45101957-45102176:mpeak_2214|chr1_44870959_45116375_RNF220_NM_+|	127.283	3.23129	0.4438	-7.28096	3.3145e-13	1.3086e-10	89.7565	88.7678	120.336	66.4421	46.3352	41.4531	44.8782	86.1949	53.4827	247.409	331.929	310.416	161.935	17.334	0.954384	-2.26935	3.22373	RNF220	chr1:45102038:+;chr1:45102164:+	chr1_44636363_+;chr1_44636442_+;chr1_44636491_+;chr1_44636532_+
chr1:3563606-3563678:mpeak_209|chr1_3547681_3566671_WRAP73_NM_-|	27.3986	3.26131	0.951341	-3.42812	0.000607779	0.0106415	7.01223	7.71894	8.0224	0.874238	2.52738	3.8561	4.20734	33.4488	32.0896	63.8194	97.7252	67.4818	32.6236	3.16894	1.6485	-1.71534	3.36384	WRAP73	chr1:3563618:-	chr1_3647042_-
chr1:35569077-35569243:mpeak_1651|chr1_35525386_35578577_ZMYM1_NM_+|	9.00418	3.67379	1.27352	-2.88475	0.00391727	0.0374171	0	11.5784	6.68533	0.874238	5.89721	5.30214	4.20734	0	4.0112	30.5983	21.0615	17.8345	222.226	17.3735	0.597128	-3.07994	3.67707	ZMYM1	chr1:35569129:+;chr1:35569166:+;chr1:35569241:+	chr1_35103526_+;chr1_35103639_+
chr1:35482846-35482922:mpeak_1647|chr1_35454536_35497569_ZMYM6_NM_-|	8.66228	2.84982	1.22682	-2.32294	0.0201825	0.116913	2.80489	19.2974	8.0224	2.62272	7.58213	3.37409	1.40245	11.5784	1.33707	7.86815	16.8492	21.2086	210.398	29.5671	1.14957	-1.68149	2.83106	ZMYM6	chr1:35482796:-;chr1:35482850:-	chr1_35017250_-
chr1:33234446-33234556:mpeak_1588|chr1_33207511_33238465_KIAA1522_NM_+|	67.5842	1.45618	0.596864	-2.43971	0.0146989	0.094545	19.6342	14.1514	30.7525	12.2393	14.3218	13.9784	61.7076	109.352	86.9093	129.387	217.354	101.223	25.0178	9.04972	0.670824	-0.796188	1.46701	KIAA1522	chr1:33234497:+	chr1_32768893_+;chr1_32768962_+
chr1:243469688-243469750:mpeak_8820|chr1_243419306_243663057_SDCCAG8_NM_+|	7.72238	2.27192	0.984058	-2.30872	0.0209589	0.119594	9.81712	7.71894	2.67413	2.62272	5.89721	3.37409	2.80489	10.2919	2.67413	16.6105	11.7944	16.3884	128.148	26.5531	0.764847	-1.50602	2.27086	SDCCAG8	chr1:243469744:+	chr1_243306459_+
chr1:24305030-24305153:mpeak_1081|chr1_24294213_24306953_SRSF10_NR_-mpeak_1081|chr1_24297929_24306953_SRSF10_NM_-||	63.1469	2.75329	0.891987	-3.08669	0.00202395	0.0235667	32.2562	45.0272	10.6965	0.874238	18.5341	5.30214	58.9027	93.9138	72.2016	111.028	146.588	162.438	39.099	5.88268	1.83205	-0.900535	2.73259	SRSF10	chr1:24305069:-	chr1_23978540_-;chr1_23978581_-
chr1:233231397-233231453:mpeak_8605|chr1_233120223_233431459_PCNXL2_NM_-|	8.41605	2.32889	0.886751	-2.62632	0.00863139	0.0657143	16.8293	11.5784	16.0448	2.62272	1.68492	4.82013	2.80489	9.00543	10.6965	6.11967	10.1095	8.67623	197.507	36.6497	2.28393	-0.146094	2.43003	PCNXL2	chr1:233231401:-	-
chr1:211572439-211572564:mpeak_7887|chr1_211556096_211605660_LINC00467_NR_+|	9.83195	2.15951	0.883032	-2.44556	0.0144627	0.0933882	9.81712	12.8649	4.0112	4.37119	5.05475	3.37409	11.2196	5.14596	9.35947	10.4909	17.6916	24.5827	103.764	24.2585	1.06033	-1.03641	2.09674	LINC00467	chr1:211572489:+;chr1:211572561:+	chr1_211399152_+
chr1:211571645-211571739:mpeak_7886|chr1_211556096_211605660_LINC00467_NR_+|	10.9792	2.7048	1.10848	-2.44009	0.0146837	0.0945204	9.81712	20.5838	9.35947	10.4909	2.52738	0.482013	11.2196	5.14596	9.35947	10.4909	17.6916	24.5827	154.56	25.5855	1.55835	-1.03641	2.59476	LINC00467	chr1:211571663:+;chr1:211571698:+;chr1:211571731:+	chr1_211398354_+;chr1_211398388_+
chr1:200819167-200819368:mpeak_7337|chr1_200708685_200826881_CAMSAP2_NM_+|	40.3759	3.02252	0.669817	-4.51246	6.40798e-06	0.000340568	5.60978	2.57298	16.0448	7.86815	4.21229	6.26617	16.8293	20.5838	24.0672	122.393	139.006	119.057	39.407	4.82226	0.401136	-2.62953	3.03067	CAMSAP2	chr1:200819338:+	chr1_200850202_+
chr1:180386141-180386198:mpeak_6870|chr1_180257652_180472022_ACBD6_NM_-|	32.8482	2.54162	1.08087	-2.35146	0.0187001	0.111142	4.20734	16.7244	1.33707	0	2.52738	0.482013	67.3174	63.038	84.2352	31.4726	60.657	62.1797	10.3773	2.92535	2.88748	0.475762	2.41172	ACBD6	chr1:180386147:-	chr1_180417013_-
chr1:17931324-17931381:mpeak_778|chr1_17866329_18023342_ARHGEF10L_NM_+|	17.0453	4.73031	0.969734	-4.87795	1.07196e-06	7.90878e-05	18.2318	3.85947	5.34827	4.37119	5.89721	1.92805	1.40245	3.85947	8.0224	54.2028	53.0749	44.3452	206.556	8.04394	1.16979	-3.51269	4.68249	ARHGEF10L	chr1:17931376:+	chr1_17604879_+
chr1:171527519-171527610:mpeak_6546|chr1_171454665_171560725_PRRC2C_NM_+|	76.8855	1.78962	0.795126	-2.25074	0.0244021	0.132608	9.81712	27.0163	24.0672	30.5983	33.6983	9.15825	18.2318	72.0435	64.1792	195.829	224.936	213.05	39.4295	11.5893	-0.270403	-2.03688	1.76648	PRRC2C	chr1:171527604:+	chr1_171558428_+;chr1_171558463_+
chr1:16928871-16928921:mpeak_735|chr1_16890681_16940100_NBPF1_NM_-|	77.8692	3.4641	0.768362	-4.50842	6.53134e-06	0.000344913	16.8293	3.85947	6.68533	1.74848	2.52738	1.92805	58.9027	77.1894	120.336	222.931	212.3	209.194	10.6752	0.962705	2.14157	-1.32946	3.47102	NBPF1	chr1:16928885:-	-
chr1:16926052-16926181:mpeak_733|chr1_16890681_16940100_NBPF1_NM_-|	83.2279	2.10466	0.501858	-4.19374	2.74387e-05	0.00108849	22.4391	16.7244	22.7301	9.61662	14.3218	12.0503	58.9027	77.1894	120.336	222.931	212.3	209.194	24.1368	5.58464	0.782245	-1.32946	2.1117	NBPF1	chr1:16926051:-;chr1:16926088:-	-
chr1:16920091-16920227:mpeak_732|chr1_16890681_16940100_NBPF1_NM_-|	77.9777	1.85612	0.779873	-2.38003	0.0173113	0.105613	2.80489	6.43245	10.6965	10.4909	2.52738	1.92805	58.9027	77.1894	120.336	222.931	212.3	209.194	7.77367	2.31933	0.415435	-1.32946	1.74489	NBPF1	chr1:16920150:-	-
chr1:151867305-151867483:mpeak_5559|chr1_151847404_151882361_THEM4_NM_-|	25.0636	1.41452	0.601502	-2.35165	0.0186904	0.111142	35.0611	25.7298	29.4155	12.2393	8.42459	4.33812	29.4513	46.3137	33.4267	27.1014	19.3765	29.8848	82.6129	32.7412	1.85118	0.515922	1.33526	THEM4	chr1:151867306:-;chr1:151867424:-	chr1_151894902_-;chr1_151894939_-
chr1:151022675-151022780:mpeak_5393|chr1_151020258_151022913_C1orf56_NM_+|	21.9235	1.30427	0.559034	-2.33308	0.0196441	0.114778	28.0489	24.4433	37.4379	20.9817	20.219	21.6906	12.622	15.4379	12.0336	19.2332	31.171	19.7625	224.301	89.6312	0.515943	-0.807419	1.32336	C1orf56	chr1:151022728:+	chr1_151050251_+
chr1:150917717-150917801:mpeak_5367|chr1_150898814_150936722_SETDB1_NM_+|	53.5843	2.33359	0.495652	-4.70813	2.50004e-06	0.000155848	37.866	91.3408	58.8309	39.3407	46.3352	46.7553	22.4391	29.5893	18.7189	83.9269	89.3006	78.5681	265.788	52.5947	0.505779	-1.83151	2.33728	SETDB1	chr1:150917790:+	chr1_150945325_+
chr1:150905349-150905407:mpeak_5364|chr1_150898814_150936722_SETDB1_NM_+|	33.2089	1.60336	0.771034	-2.07949	0.0375723	0.180872	7.01223	18.0109	10.6965	6.99391	6.73967	26.5107	22.4391	29.5893	18.7189	83.9269	89.3006	78.5681	50.489	15.9829	-0.172067	-1.83151	1.65944	SETDB1	chr1:150905402:+	chr1_150932924_+
chr1:150902811-150902973:mpeak_5362|chr1_150898814_150936722_SETDB1_NM_+|	30.3212	2.67438	0.647919	-4.12764	3.66506e-05	0.00140032	8.41467	11.5784	6.68533	1.74848	7.58213	5.30214	22.4391	29.5893	18.7189	83.9269	89.3006	78.5681	37.7094	5.81136	0.866473	-1.83151	2.69798	SETDB1	chr1:150902863:+;chr1:150902912:+;chr1:150902968:+	chr1_150930385_+;chr1_150930449_+;chr1_150930490_+
chr1:148569829-148569911:mpeak_5059|chr1_148558187_148594396_NBPF15_NM_+|	45.7046	1.52196	0.61498	-2.47482	0.0133304	0.0882159	12.622	21.8703	21.3931	20.1075	19.3765	7.23019	32.2562	60.4651	41.4491	98.7889	121.314	91.5825	41.6526	14.9876	0.25861	-1.21602	1.47463	NBPF15	chr1:148569881:+;chr1:148569909:+	-
chr1:145592906-145592970:mpeak_4849|chr1_145592256_145611044_POLR3C_NM_-|	8.92833	2.45133	1.08512	-2.25905	0.0238805	0.130698	8.41467	20.5838	17.3819	9.61662	11.7944	12.0503	4.20734	0	1.33707	12.2393	4.21229	5.30214	557.684	153.819	0.471018	-1.97216	2.44318	POLR3C	chr1:145592915:-	chr1_145842191_+
chr1:14149513-14149608:mpeak_607|chr1_14026734_14149653_PRDM2_NM_+|	7.22303	4.57378	1.43312	-3.19149	0.00141541	0.0187763	1.40245	16.7244	22.7301	0.874238	0.842459	1.92805	0	9.00543	4.0112	6.99391	6.73967	15.4244	209.255	12.5	3.48669	-1.16353	4.65023	PRDM2	chr1:14149569:+;chr1:14149610:+	chr1_13823081_+
chr1:1327582-1327761:mpeak_90|chr1_1322962_1334718_CCNL2_NM_-|	53.4882	2.25773	0.463653	-4.86944	1.11913e-06	8.06845e-05	39.2685	43.7407	65.5163	35.8438	49.7051	53.9855	18.2318	27.0163	18.7189	86.5496	101.095	102.187	232.191	48.1433	0.0900902	-2.17981	2.2699	CCNL2	chr1:1327602:-;chr1:1327673:-	chr1_1392223_-;chr1_1392284_-
chr1:12567503-12567706:mpeak_582|chr1_12290095_12568946_VPS13D_NM_+|	41.1515	1.30506	0.658629	-1.98148	0.047538	0.210243	5.60978	9.00543	9.35947	3.49695	6.73967	3.8561	79.9394	56.6056	52.1456	73.436	114.574	79.0501	12.7058	5.27698	0.766561	-0.501144	1.26771	VPS13D	chr1:12567652:+;chr1:12567699:+	chr1_12507597_+;chr1_12507643_+
chr1:115116289-115116431:mpeak_4260|chr1_115110877_115124265_BCAS2_NM_-|	385.056	1.34793	0.442922	-3.04327	0.00234024	0.0257376	78.5369	45.0272	57.4939	13.9878	30.3285	28.9208	570.795	831.073	732.713	663.547	846.671	721.573	8.48213	3.28154	1.30581	-0.0642494	1.37005	BCAS2	chr1:115116303:-	chr1_114573679_-
chr1:111492689-111492841:mpeak_3965|chr1_111491021_111506566_LRIF1_NM_-|	42.1205	1.57859	0.786321	-2.00756	0.0446903	0.202806	5.60978	6.43245	6.68533	1.74848	16.0067	15.4244	18.2318	27.0163	25.4043	108.406	115.417	159.064	26.5066	8.66565	-0.825133	-2.43811	1.61297	LRIF1	chr1:111492783:-	chr1_110950144_-
chr1:11081997-11082157:mpeak_508|chr1_11072678_11082180_TARDBP_NM_+|	462.351	2.26256	0.463938	-4.87686	1.07791e-06	7.90878e-05	56.0978	108.065	93.5947	31.4726	72.4514	41.9351	373.05	501.731	514.771	1273.77	1240.1	1241.18	18.5497	3.88435	0.82144	-1.43421	2.25565	TARDBP	chr1:11082051:+;chr1:11082148:+	chr1_11022050_+;chr1_11022089_+
chr1:109290663-109290723:mpeak_3747|chr1_109289284_109351404_STXBP3_NM_+|	20.8002	2.39059	0.800053	-2.98804	0.00280769	0.029308	2.80489	10.2919	6.68533	0	4.21229	2.89208	18.2318	30.8758	26.7413	45.4604	45.4928	55.9135	26.081	7.25594	1.47742	-0.953307	2.43073	STXBP3	chr1:109290724:+	chr1_108748101_+
chr1:108211455-108211600:mpeak_3680|chr1_108115994_108507545_VAV3_NM_-|	68.2808	3.90561	0.812202	-4.80867	1.51937e-06	0.000104975	9.81712	3.85947	1.33707	2.62272	5.05475	6.26617	9.81712	27.0163	13.3707	187.961	301.6	250.647	29.9052	1.88375	0.106668	-3.88205	3.98872	VAV3	chr1:108211461:-;chr1:108211546:-	chr1_107668841_-;chr1_107668926_-
chrX:76909575-76909702:mpeak_85526|chrX_76764107_77041755_ATRX_NM_-|	111.03	1.13114	0.382748	-2.9553	0.00312367	0.0316605	58.9027	47.6001	45.4603	26.2272	26.1162	28.4388	138.842	186.541	181.841	167.854	184.498	240.042	29.9597	13.6365	0.911613	-0.223935	1.13555	ATRX	-	chrX_77654124_-
chrX:109263586-109263711:mpeak_85872|chrX_109245862_109416472_TMEM164_NM_+|	52.3147	1.70525	0.733576	-2.32457	0.0200951	0.116591	15.4269	6.43245	9.35947	0.874238	0	5.30214	91.1589	111.925	124.347	72.5618	100.253	90.1364	9.53448	3.52331	2.33758	0.316397	2.02118	TMEM164	-	chrX_110020479_+
chrX:100872520-100872581:mpeak_85714|chrX_100870750_100872991_ARMCX6_NR_-mpeak_85714|chrX_100871756_100872991_ARMCX6_NM_-||	3.2392	4.4484	1.65024	-2.6956	0.00702618	0.0570252	9.81712	2.57298	4.0112	4.37119	3.36983	3.37409	0	0	0	4.37119	5.05475	1.92805	#DIV/0!	97.8961	0.561287	-Inf	Inf	ARMCX6	-	chrX_101617530_-
chr9:99107445-99107500:mpeak_82398|chr9_99077181_99145992_SLC35D2_NR_-mpeak_82398|chr9_99083623_99145992_SLC35D2_NM_-||	57.1628	3.22033	1.08893	-2.95735	0.00310295	0.0316051	2.80489	14.1514	4.0112	0	0.842459	0.964026	72.9271	151.806	127.021	88.2981	130.581	92.5465	5.96083	0.870104	3.5369	0.175681	3.36122	SLC35D2	-	chr9_96345168_-
chr9:5098284-5098347:mpeak_80940|chr9_4985244_5126683_JAK2_NM_+|	94.5585	7.14052	0.581227	-12.2853	1.08698e-34	3.00405e-31	389.88	313.904	189.863	8.74238	10.952	5.78416	14.0245	15.4379	14.7077	48.0831	57.2872	66.0358	2023.2	14.8644	5.13235	-1.95628	7.08863	JAK2	-	chr9_5098333_+
chr9:5095156-5095221:mpeak_80933|chr9_4985244_5126683_JAK2_NM_+|	22.4122	6.59801	1.00712	-6.55134	5.70214e-11	1.52505e-08	18.2318	11.5784	21.3931	0	1.68492	0.482013	14.0245	15.4379	14.7077	48.0831	57.2872	66.0358	115.923	1.89631	4.56251	-1.95628	6.51879	JAK2	-	chr9_5095225_+
chr9:5092764-5092851:mpeak_80929|chr9_4985244_5126683_JAK2_NM_+|	52.0504	8.37819	0.737211	-11.3647	6.26742e-30	1.29908e-26	162.684	141.514	100.28	2.62272	0	1.92805	14.0245	15.4379	14.7077	48.0831	57.2872	66.0358	915.728	3.98244	6.47381	-1.95628	8.43008	JAK2	-	chr9_5092817_+
chr9:33988961-33989133:mpeak_81349|chr9_33922597_34048947_UBAP2_NM_-|	119.442	1.03558	0.347298	-2.98182	0.00286541	0.0297335	134.635	106.779	135.044	90.9208	74.9788	109.899	119.208	95.2003	96.2688	148.621	181.971	139.784	121.173	58.6337	0.448871	-0.598397	1.04727	UBAP2	-	chr9_33989042_-
chr9:132641135-132641212:mpeak_83721|chr9_132597695_132642391_USP20_NM_+|	17.5331	4.84828	1.3581	-3.5699	0.000357121	0.00734712	2.80489	7.71894	9.35947	0	0	0.482013	26.6465	42.4542	21.3931	32.3468	38.7531	28.4388	21.972	1.45274	5.36634	-0.13744	5.50378	USP20	-	chr9_129878906_+
chr9:111752995-111753061:mpeak_82771|chr9_111705151_111775874_CTNNAL1_NM_-|	45.5492	1.10813	0.448215	-2.47232	0.0134237	0.0886823	57.5003	64.3245	89.5835	24.4787	25.2738	30.3668	39.2685	47.6001	52.1456	42.8377	43.8078	29.4028	152.077	69.0396	1.39981	0.260507	1.1393	CTNNAL1	-	chr9_108990731_-
chr8:92083347-92083518:mpeak_79172|chr8_92082423_92097011_OTUD6B_NM_+|	69.9461	0.799942	0.401492	-1.99242	0.0463245	0.206715	99.5736	91.3408	78.8869	64.6936	89.3006	106.043	36.4636	34.7352	44.1232	65.5679	57.2872	71.3379	233.955	133.907	0.0531802	-0.751823	0.805003	OTUD6B	-	chr8_91071178_+
chr8:81557022-81557075:mpeak_78965|chr8_81553712_81787016_ZNF704_NM_-|	12.3855	3.38664	1.02036	-3.31906	0.000903207	0.0140066	11.2196	2.57298	10.6965	0.874238	5.89721	1.44604	7.01223	15.4379	4.0112	26.2272	26.1162	37.115	92.5467	9.18582	1.57537	-1.75733	3.3327	ZNF704	-	chr8_80644790_-
chr8:68070677-68070734:mpeak_78722|chr8_67976602_68107616_CSPP1_NM_+|	8.52717	3.29467	1.46324	-2.25163	0.024346	0.132536	7.01223	11.5784	2.67413	20.9817	11.7944	27.4747	0	0	0	6.11967	8.42459	6.26617	#DIV/0!	289.523	-1.50252	-Inf	Inf	CSPP1	-	chr8_67158563_+
chr8:68049679-68049821:mpeak_78720|chr8_67976602_68107616_CSPP1_NM_+|	4.01333	4.80059	1.74199	-2.7558	0.00585484	0.0501472	11.2196	2.57298	0	5.24543	2.52738	5.78416	0	0	0	6.11967	8.42459	6.26617	#DIV/0!	65.1451	0.0248546	-Inf	Inf	CSPP1	-	chr8_67137460_+
chr8:68044263-68044322:mpeak_78719|chr8_67976602_68107616_CSPP1_NM_+|	5.9672	5.39347	1.74999	-3.08199	0.00205618	0.0238098	2.80489	20.5838	6.68533	10.4909	9.26704	0.964026	0	0	0	6.11967	8.42459	6.26617	#DIV/0!	99.5748	0.537362	-Inf	Inf	CSPP1	-	chr8_67132078_+
chr8:117862883-117863014:mpeak_79965|chr8_117859930_117887105_RAD21_NM_-|	339.796	1.24259	0.364223	-3.41162	0.000645782	0.0110704	39.2685	42.4542	28.0784	44.5862	48.8626	46.7553	300.123	257.298	394.435	976.524	1025.27	873.889	11.5355	4.8755	-0.352636	-1.59509	1.24246	RAD21	-	chr8_116850654_-;chr8_116850731_-
chr7:77365712-77365948:mpeak_75125|chr7_77325742_77407846_RSBN1L_NM_+|	18.0461	1.91231	0.794037	-2.40834	0.0160251	0.100327	4.20734	12.8649	8.0224	17.4848	11.7944	21.6906	7.01223	1.28649	8.0224	34.0953	50.5475	39.5251	153.756	41.0491	-1.02226	-2.92748	1.90522	RSBN1L	-	chr7_77736620_+
chr7:5028684-5028820:mpeak_73318|chr7_5013615_5036240_RNF216P1_NR_+|	56.9357	3.12354	0.661353	-4.72295	2.32449e-06	0.000147117	77.1345	59.1786	68.1904	92.6693	97.7252	74.712	1.40245	10.2919	5.34827	55.9513	97.7252	42.8992	1199.95	134.862	-0.374447	-3.52786	3.15342	RNF216P1	-	chr7_4989112_+
chr7:158669293-158669374:mpeak_77352|chr7_158649268_158738271_WDR60_NM_+|	4.45487	3.31606	1.61603	-2.05198	0.0401715	0.189563	1.40245	6.43245	12.0336	4.37119	6.73967	7.71221	0	0	1.33707	1.74848	5.89721	5.78416	495.326	140.159	0.077981	-3.3283	3.40628	WDR60	-	chr7_158876618_+
chr7:138943301-138943377:mpeak_76736|chr7_138916230_138982532_UBN2_NM_+|	42.3824	1.79615	0.609357	-2.94762	0.00320235	0.0323001	8.41467	9.00543	2.67413	8.74238	10.1095	9.64026	22.4391	30.8758	24.0672	145.124	107.835	129.661	25.9676	7.4466	-0.503782	-2.30584	1.80206	UBN2	-	chr7_139258604_+
chr7:135267787-135267881:mpeak_76643|chr7_135242661_135333151_NUP205_NM_+|	22.2877	1.9011	0.820367	-2.31738	0.020483	0.118098	9.81712	6.43245	6.68533	1.74848	0.842459	2.41006	33.6587	34.7352	58.8309	45.4604	37.9106	28.9208	18.0271	4.45358	2.19726	0.180128	2.01713	NUP205	-	chr7_135583128_+
chr7:104717397-104717648:mpeak_75915|chr7_104654636_104752271_KMT2E_NM_+|	24.6525	3.46617	1.06488	-3.25499	0.00113396	0.0162377	44.8782	10.2919	14.7077	34.9695	43.8078	40.4891	0	0	5.34827	21.856	40.438	39.043	435.517	117.693	-0.77128	-4.24395	3.47267	KMT2E	-	chr7_105077016_+;chr7_105077041_+;chr7_105077095_+;chr7_105077118_+
chr7:104714052-104714105:mpeak_75914|chr7_104654636_104752271_KMT2E_NM_+|	12.7262	2.506	1.1467	-2.1854	0.0288592	0.150108	1.40245	7.71894	1.33707	11.3651	12.6369	11.5683	0	0	5.34827	21.856	40.438	39.043	65.1828	35.101	-1.766	-4.24395	2.47794	KMT2E	-	chr7_105073657_+
chr6:79726309-79726371:mpeak_70913|chr6_79651047_79788011_PHIP_NM_-|	88.9064	1.22645	0.394769	-3.10677	0.00189144	0.0225553	37.866	30.8758	40.112	44.5862	47.1777	62.6617	70.1223	50.1731	64.1792	186.213	236.731	196.179	59.0075	24.9426	-0.50452	-1.7468	1.24228	PHIP	-	chr6_79016602_-
chr6:29912333-29912397:mpeak_69451|chr6_29910246_29913227_HLA-A_NM_+|	102.439	1.35532	0.546614	-2.47948	0.0131573	0.0876908	15.4269	19.2974	18.7189	3.49695	3.36983	4.33812	290.306	191.687	270.087	139.878	128.054	144.604	7.10604	2.71611	2.25388	0.866368	1.38751	HLA-A	-	chr6_29944606_+
chr6:24654704-24654766:mpeak_69089|chr6_24651297_24667115_TDP2_NM_-|	21.3826	2.2192	1.06642	-2.08097	0.0374363	0.180561	9.81712	0	18.7189	2.62272	1.68492	4.33812	11.2196	38.5947	38.7749	31.4726	53.0749	46.2732	48.3175	6.60885	1.72272	-0.562388	2.28511	TDP2	-	chr6_24654443_-
chr6:159032695-159032766:mpeak_72844|chr6_158957467_159052841_TMEM181_NM_+|	61.1031	1.65453	0.536302	-3.08506	0.00203508	0.0236315	25.244	20.5838	10.6965	14.8621	5.89721	11.0863	89.7565	84.9084	57.4939	131.136	129.739	151.834	24.3473	7.71624	0.827781	-0.830011	1.65779	TMEM181	-	chr6_158611745_+
chr6:147636644-147636695:mpeak_72401|chr6_147525493_147705849_STXBP5_NM_+|	37.3459	3.09599	0.865095	-3.57879	0.000345194	0.00722729	9.81712	2.57298	13.3707	0	0.842459	6.26617	30.8538	43.7407	33.4267	96.1662	117.102	93.9925	23.8479	3.47033	1.85753	-1.50815	3.36568	STXBP5	-	chr6_147315587_+
chr6:111701175-111701400:mpeak_71692|chr6_111621359_111804918_REV3L_NM_-|	41.9793	1.82987	0.513705	-3.56209	0.000367914	0.00745812	35.0611	23.1568	25.4043	45.4604	29.4861	44.3452	9.81712	23.1568	16.0448	74.3103	89.3006	88.2084	170.592	47.3719	-0.512535	-2.36098	1.84845	REV3L	-	chr6_111380055_-
chr6:107365458-107365538:mpeak_71482|chr6_107349375_107372260_C6orf203_NM_+|	45.0235	2.304	0.752972	-3.05987	0.0022143	0.0246757	15.4269	2.57298	9.35947	5.24543	1.68492	1.44604	54.6954	90.0543	64.1792	106.657	86.7732	102.187	13.0951	2.83353	1.70763	-0.500717	2.20835	C6orf203	-	chr6_107044306_+
chr5:95099206-95099324:mpeak_65795|chr5_95066849_95128762_RHOBTB3_NM_+|	261.97	1.72101	0.504546	-3.411	0.000647245	0.0110704	42.0734	23.1568	20.056	8.74238	8.42459	8.19422	415.124	609.796	505.411	444.113	627.632	430.92	5.57305	1.68775	1.74969	0.0263214	1.72337	RHOBTB3	-	chr5_95763616_+
chr5:70363308-70363525:mpeak_65171|chr5_70331623_70363497_GTF2H2_NM_-|	31.8623	1.6632	0.583952	-2.84818	0.00439706	0.0409618	26.6465	9.00543	21.3931	28.8499	21.0615	23.1366	22.4391	18.0109	9.35947	74.3103	64.0269	64.1077	114.526	36.0829	-0.356744	-2.02304	1.66629	GTF2H2	-	chr5_71067683_-
chr5:37381714-37381797:mpeak_64417|chr5_37379411_37752587_WDR70_NM_+|	17.3671	2.11376	1.01334	-2.08594	0.0369842	0.178688	11.2196	1.28649	16.0448	20.9817	32.0134	32.7769	2.80489	3.85947	0	29.7241	21.0615	36.633	285.607	98.1165	-1.58697	-3.7134	2.12643	WDR70	-	chr5_37381675_+
chr5:179016548-179016653:mpeak_68295|chr5_178977561_179036376_RUFY1_NM_+|	69.5563	1.11519	0.559108	-1.99458	0.0460885	0.205995	42.0734	14.1514	38.7749	15.7363	26.9587	19.7625	88.354	72.0435	118.999	111.903	122.999	162.92	34.0018	15.6999	0.605048	-0.509809	1.11486	RUFY1	-	chr5_179589582_+;chr5_179589647_+
chr5:169021586-169021689:mpeak_67871|chr5_169010637_169031063_SPDL1_NM_+|	28.1603	2.73137	1.02249	-2.67129	0.00755604	0.0598347	26.6465	1.28649	8.0224	1.74848	4.21229	3.8561	15.4269	39.8812	46.7973	41.0892	83.4034	65.5538	35.2139	5.16551	1.87287	-0.896292	2.76916	SPDL1	-	chr5_169594643_+
chr5:167920889-167920983:mpeak_67832|chr5_167913462_167946085_RARS_NM_+|	90.4186	4.30919	0.859392	-5.01424	5.32447e-07	4.50461e-05	8.41467	6.43245	17.3819	2.62272	0	0.964026	72.9271	147.946	116.325	229.925	229.991	252.093	9.55787	0.755624	3.16761	-1.0783	4.24591	RARS	-	chr5_168493914_+;chr5_168493939_+
chr5:145609308-145609478:mpeak_67417|chr5_145583162_145665509_RBM27_NM_+|	61.8157	0.986838	0.473064	-2.08605	0.0369737	0.178688	46.2807	20.5838	18.7189	27.1014	26.1162	32.2949	51.8905	68.184	69.5275	119.771	136.478	124.841	45.1385	22.4389	0.00119735	-1.00716	1.00836	RBM27	-	chr5_146229896_+
chr5:132232012-132232177:mpeak_66701|chr5_132216878_132299354_AFF4_NM_-|	75.0552	1.40598	0.556088	-2.52834	0.0114602	0.0801151	19.6342	9.00543	29.4155	18.359	6.73967	15.4244	81.3418	99.0598	98.9429	183.59	148.273	190.877	20.7826	7.75206	0.51868	-0.904048	1.42273	AFF4	-	chr5_132896329_-;chr5_132896419_-
chr4:6843785-6843957:mpeak_60258|chr4_6784458_6882513_KIAA0232_NM_+|	33.1442	3.0307	0.839786	-3.6089	0.000307502	0.00667409	9.81712	1.28649	4.0112	7.86815	5.05475	13.0143	2.80489	12.8649	6.68533	104.909	113.732	115.683	67.6123	7.75813	-0.779063	-3.90257	3.1235	KIAA0232	-	chr4_6842090_+
chr4:56734490-56734654:mpeak_61192|chr4_56719815_56770508_EXOC1_NM_+|	25.5583	1.87982	0.921872	-2.03913	0.0414372	0.193553	8.41467	7.71894	0	6.99391	0.842459	3.8561	15.4269	19.2974	41.4491	68.1906	73.2939	61.2156	31.7702	5.76836	0.46449	-1.41199	1.87648	EXOC1	-	chr4_55868413_+
chr4:27003885-27004021:mpeak_60601|chr4_26862312_27024140_STIM2_NM_+|	77.1254	1.26617	0.521351	-2.42864	0.0151555	0.0963513	64.5125	24.4433	48.1344	62.9452	41.2805	46.2732	79.9394	52.7461	42.7861	134.633	156.697	171.115	78.1267	32.5442	-0.134627	-1.39804	1.26342	STIM2	-	chr4_27002328_+
chr4:144464662-144464814:mpeak_62945|chr4_144434615_144474271_SMARCA5_NM_+|	86.9514	1.596	0.796194	-2.00454	0.0450121	0.203387	25.244	9.00543	12.0336	9.61662	6.73967	1.44604	79.9394	219.99	167.133	144.249	188.711	179.309	9.90939	3.47519	1.37842	-0.133285	1.5117	SMARCA5	-	chr4_143543558_+;chr4_143543649_+
chr4:113092589-113092737:mpeak_62384|chr4_113066552_113107848_C4orf32_NM_+|	86.4684	1.26739	0.617113	-2.05374	0.0400008	0.18908	102.378	29.5893	32.0896	27.9756	15.1643	18.7985	147.257	129.936	148.414	122.393	123.841	139.784	38.5467	16.0454	1.40529	0.140851	1.26444	C4orf32	-	chr4_112171579_+
chr3:37317160-37317528:mpeak_55206|chr3_37284681_37407570_GOLGA4_NM_+|	138.306	1.11558	0.491124	-2.27149	0.0231176	0.12812	311.343	245.72	264.739	167.854	163.437	208.23	23.8416	64.3245	34.7637	39.3407	72.4514	63.6257	668.513	307.563	0.607113	-0.512961	1.12007	GOLGA4	-	chr3_37275941_+
chr3:196215487-196215560:mpeak_59659|chr3_196199643_196230639_RNF168_NM_-|	58.6798	0.956842	0.445126	-2.1496	0.0315871	0.16084	51.8905	68.184	32.0896	68.1906	75.8213	76.158	26.6465	23.1568	37.4379	83.9269	75.8213	84.8343	174.418	90.0187	-0.53299	-1.48724	0.95425	RNF168	-	chr3_196488642_-
chr3:195997283-195997425:mpeak_59627|chr3_195965765_196014584_PCYT1A_NM_-|	55.5297	2.20069	0.779061	-2.8248	0.00473107	0.0432473	214.574	86.1949	68.1904	90.9208	75.8213	72.3019	1.40245	7.71894	5.34827	14.8621	16.0067	13.0143	2549.88	544.729	0.626186	-1.60064	2.22682	PCYT1A	-	chr3_196270500_-
chr3:185331128-185331204:mpeak_59326|chr3_185304030_185347569_SENP2_NM_+|	35.8615	1.53225	0.657684	-2.32976	0.0198188	0.115554	11.2196	21.8703	8.0224	10.4909	5.05475	8.19422	26.6465	45.0272	65.5163	66.4421	80.876	80.9782	29.9674	10.3987	0.79226	-0.734733	1.52699	SENP2	-	chr3_185613350_+
chr3:170108828-170109057:mpeak_58869|chr3_170075472_170110046_SKIL_NM_+|	111.12	1.19851	0.414655	-2.89037	0.00384787	0.0369672	19.6342	28.3028	21.3931	45.4604	29.4861	49.1653	70.1223	84.9084	66.8533	278.882	320.134	319.093	31.2461	13.5182	-0.840086	-2.04886	1.20877	SKIL	-	chr3_170391164_+;chr3_170391200_+
chr3:170079005-170079224:mpeak_58867|chr3_170075472_170110046_SKIL_NM_+|	103.659	1.93398	0.434729	-4.4487	8.63931e-06	0.000423665	16.8293	16.7244	16.0448	23.6044	14.3218	16.3884	70.1223	84.9084	66.8533	278.882	320.134	319.093	22.3534	5.91593	-0.131045	-2.04886	1.91781	SKIL	-	chr3_170361327_+;chr3_170361363_+
chr3:167742298-167742384:mpeak_58769|chr3_167728206_167813713_GOLIM4_NM_-|	19.659	1.5335	0.672657	-2.27976	0.0226216	0.126013	11.2196	9.00543	10.6965	5.24543	1.68492	5.78416	28.0489	34.7352	22.7301	41.9634	28.6436	36.151	36.1595	11.9096	1.28214	-0.320107	1.60224	GOLIM4	-	chr3_168024575_-
chr3:160665426-160665749:mpeak_58677|chr3_160473995_160786598_PPM1L_NM_+|	215.977	5.41767	0.600744	-9.01827	1.91088e-19	1.76034e-16	1071.47	580.207	724.69	56.8255	42.1229	31.3308	5.60978	9.00543	10.6965	24.4787	19.3765	15.9064	9388.39	217.998	4.18908	-1.23941	5.42849	PPM1L	-	chr3_160947688_+;chr3_160947784_+;chr3_160947824_+;chr3_160947947_+
chr3:107429294-107429428:mpeak_56844|chr3_107241782_107524216_BBX_NM_+|	140.109	0.932972	0.436405	-2.13786	0.0325282	0.164346	28.0489	14.1514	18.7189	12.2393	20.219	11.5683	245.428	191.687	231.313	304.235	299.073	304.632	9.11381	4.84907	0.468521	-0.441826	0.910346	BBX	-	chr3_107710527_+;chr3_107710579_+
chr3:101383376-101383565:mpeak_56761|chr3_101370527_101395988_ZBTB11_NM_-|	36.1428	1.95926	0.749585	-2.61379	0.00895436	0.0674301	4.20734	0	16.0448	6.99391	5.05475	5.78416	23.8416	37.3082	28.0784	98.7889	107.835	99.7767	34.0455	5.8201	0.18354	-1.77985	1.96339	ZBTB11	-	chr3_101664565_-
chr3:100034867-100035013:mpeak_56691|chr3_99979660_100042430_TBC1D23_NM_+|	38.2795	2.18237	0.805615	-2.70896	0.00674953	0.0554612	9.81712	2.57298	18.7189	2.62272	3.36983	4.33812	37.866	45.0272	80.224	70.8133	114.574	69.4099	19.0716	4.05446	1.5904	-0.643443	2.23384	TBC1D23	-	chr3_100316164_+
chr22:42478017-42478076:mpeak_53959|chr22_42475694_42479122_SMDT1_NM_+|	102.33	1.46586	0.585732	-2.50261	0.0123282	0.0838503	26.6465	12.8649	30.7525	6.99391	1.68492	3.37409	277.684	294.606	211.257	107.531	139.848	114.719	8.96741	3.32863	2.5434	1.11364	1.42976	SMDT1	-	chr22_42082036_+
chr22:28256115-28256188:mpeak_53279|chr22_28249651_28315294_PITPNB_NM_-|	209.814	1.57192	0.424268	-3.70501	0.000211382	0.00507312	44.8782	37.3082	29.4155	48.9573	40.438	51.0934	105.183	165.957	204.571	539.405	589.721	660.84	23.46	7.84868	-0.332092	-1.91177	1.57968	PITPNB	-	chr22_27860131_-
chr22:19893504-19893562:mpeak_52971|chr22_19863330_19929515_TXNRD2_NM_-mpeak_52971|chr22_19863330_19929515_TXNRD2_NM_-||	30.3602	1.83679	0.910684	-2.01694	0.043702	0.199963	1.40245	6.43245	17.3819	1.74848	3.36983	0.482013	47.6831	83.6219	64.1792	50.7058	39.5956	47.7193	12.8996	4.0576	2.1708	0.502168	1.66863	TXNRD2	-	chr22_19905984_-
chr21:36227402-36227452:mpeak_52215|chr21_36164907_36421595_RUNX1_NM_-|	33.7884	6.23674	1.40187	-4.44888	8.63201e-06	0.000423665	15.4269	0	6.68533	0.874238	0	0	25.244	48.8866	30.7525	97.9147	90.9855	88.6904	31.6241	0.944814	4.66067	-1.40418	6.06485	RUNX1	-	chr21_34855077_-
chr20:9149558-9149624:mpeak_49862|chr20_9049700_9459567_PLCB4_NM_+|	75.1698	2.17969	0.841512	-2.5902	0.009592	0.0706281	361.831	81.0489	181.841	90.0465	24.4313	35.1869	21.0367	27.0163	13.3707	16.6105	23.5888	26.0287	1017.07	225.984	2.06148	-0.108649	2.17013	PLCB4	-	chr20_9168966_+
chr20:58513104-58513193:mpeak_51594|chr20_58508818_58518994_FAM217B_NM_+|	91.0701	3.41389	0.747091	-4.56958	4.88699e-06	0.00027012	15.4269	2.57298	13.3707	4.37119	0.842459	1.44604	109.391	91.3408	135.044	194.955	276.326	247.755	9.34272	0.926197	2.23588	-1.09857	3.33445	FAM217B	-	chr20_59938099_+
chr2:73682287-73682452:mpeak_45097|chr2_73612885_73836694_ALMS1_NM_+|	13.1702	3.07459	0.913215	-3.36677	0.000760529	0.0124058	37.866	12.8649	9.35947	10.4909	12.6369	11.5683	4.20734	5.14596	1.33707	21.856	14.3218	16.3884	562.099	66.0045	0.792363	-2.29782	3.09019	ALMS1	-	chr2_73455235_+;chr2_73455348_+
chr2:239237562-239237884:mpeak_49406|chr2_239229184_239307394_TRAF3IP1_NM_+|	29.0062	1.13862	0.563731	-2.01978	0.0434057	0.199047	29.4513	14.1514	38.7749	21.856	16.0067	26.5107	21.0367	28.3028	24.0672	37.5922	42.1229	48.2013	112.221	50.3245	0.355789	-0.801219	1.15701	TRAF3IP1	-	chr2_238328979_+;chr2_238329011_+;chr2_238329065_+;chr2_238329173_+;chr2_238329195_+
chr2:212641197-212641275:mpeak_48655|chr2_212248785_213403352_ERBB4_NM_-|	14.9979	6.59271	1.27781	-5.15939	2.4776e-07	2.36113e-05	40.6709	39.8812	17.3819	0	0	0.964026	14.0245	6.43245	14.7077	20.9817	10.952	13.9784	278.501	6.29917	6.66659	-0.384748	7.05134	ERBB4	-	chr2_211776495_-
chr2:212638503-212638725:mpeak_48650|chr2_212248785_213403352_ERBB4_NM_-|	84.0609	4.87339	0.555814	-8.76802	1.81836e-18	1.37054e-15	352.014	248.293	287.469	13.9878	14.3218	11.5683	14.0245	6.43245	14.7077	20.9817	10.952	13.9784	2524.63	86.8572	4.47653	-0.384748	4.86128	ERBB4	-	chr2_211773812_-
chr2:17897480-17897535:mpeak_43253|chr2_17846880_17935096_SMC6_NM_-|	16.7317	2.09277	1.01053	-2.07095	0.038363	0.183543	12.622	0	9.35947	3.49695	1.68492	0.482013	18.2318	30.8758	37.4379	27.1014	32.0134	27.4747	38.0982	6.54107	1.95642	-0.000735396	1.95716	SMC6	-	chr2_17716213_-
chr2:169020302-169020399:mpeak_47417|chr2_168812080_169104105_STK39_NM_-|	30.0365	2.18752	0.937307	-2.33384	0.0196042	0.114625	8.41467	1.28649	13.3707	0.874238	4.21229	0	53.2929	60.4651	64.1792	62.9452	51.39	40.0071	12.9663	4.94343	2.18138	0.205235	1.97614	STK39	-	chr2_168163841_-
chr2:160303288-160303411:mpeak_47255|chr2_160176929_160473112_BAZ2B_NM_-|	19.4604	2.62571	0.934547	-2.8096	0.00496025	0.0444847	9.81712	0	2.67413	6.99391	7.58213	3.8561	9.81712	3.85947	6.68533	44.5862	64.8693	72.784	92.0192	10.1142	-0.561306	-3.16189	2.60058	BAZ2B	-	chr2_159446791_-
chr2:160261355-160261429:mpeak_47250|chr2_160176929_160473112_BAZ2B_NM_-|	22.5088	1.84436	0.92128	-2.00195	0.0452897	0.204031	8.41467	0	10.6965	16.6105	23.5888	8.19422	9.81712	3.85947	6.68533	44.5862	64.8693	72.784	140.786	26.555	-1.3404	-3.16189	1.82149	BAZ2B	-	chr2_159404848_-
chr19:55591335-55591397:mpeak_42557|chr19_55587220_55598895_EPS8L1_NM_+|	90.6192	1.17208	0.553314	-2.11829	0.0341504	0.170055	18.2318	5.14596	17.3819	5.24543	5.05475	6.26617	190.733	199.406	140.392	156.489	181.129	161.956	7.6828	3.3161	1.29888	0.0867386	1.21215	EPS8L1	-	chr19_55080024_+
chr19:49090764-49090876:mpeak_41977|chr19_49055428_49102391_SULT2B1_NM_+|	30.0442	1.60245	0.761767	-2.1036	0.0354135	0.174805	4.20734	9.00543	6.68533	0	4.21229	4.33812	49.0856	48.8866	40.112	87.4238	56.4447	50.1293	14.4101	6.61121	1.21857	-0.490493	1.70906	SULT2B1	-	chr19_48587561_+
chr19:4422550-4422800:mpeak_39481|chr19_4402659_4442921_CHAF1A_NM_+|	63.8614	0.87703	0.442981	-1.97983	0.0477222	0.210633	58.9027	48.8866	36.1008	69.9391	64.0269	65.0717	22.4391	51.4596	45.4603	90.0465	103.622	110.381	120.552	65.4622	-0.468074	-1.349	0.880927	CHAF1A	-	chr19_4422627_+;chr19_4422677_+;chr19_4422719_+;chr19_4422778_+
chr19:36719642-36719726:mpeak_41108|chr19_36705503_36726560_ZNF146_NM_+|	154.07	2.24762	0.743649	-3.02242	0.00250759	0.026861	53.2929	14.1514	20.056	14.8621	34.5408	7.23019	158.476	136.368	128.358	478.208	368.997	434.294	20.6757	4.41928	0.627644	-1.59841	2.22606	ZNF146	-	chr19_36228769_+;chr19_36228794_+
chr19:36584227-36584289:mpeak_41096|chr19_36545782_36595669_WDR62_NM_+|	18.7211	1.92839	0.787614	-2.4484	0.0143493	0.0928837	18.2318	6.43245	14.7077	2.62272	6.73967	4.33812	19.6342	27.0163	26.7413	21.856	52.2324	24.1006	53.6462	13.9532	1.52294	-0.419942	1.94288	WDR62	-	chr19_36093377_+
chr18:9221843-9222002:mpeak_38000|chr18_9136750_9280938_ANKRD12_NM_+|	18.2187	2.52831	1.08081	-2.33926	0.019322	0.113631	81.3418	27.0163	38.7749	19.2332	21.0615	13.9784	1.40245	0	4.0112	3.49695	5.89721	2.41006	1811.88	459.777	1.43881	-1.12463	2.56344	ANKRD12	-	chr18_9221986_+
chr18:9182454-9182520:mpeak_37997|chr18_9136750_9280938_ANKRD12_NM_+|	7.82083	3.55011	1.35158	-2.62664	0.00862337	0.0657135	23.8416	27.0163	13.3707	3.49695	8.42459	0.482013	1.40245	0	4.0112	3.49695	5.89721	2.41006	790.946	105.077	2.37246	-1.12463	3.49709	ANKRD12	-	chr18_9182489_+
chr18:60231812-60231872:mpeak_38978|chr18_60190657_60251678_ZCCHC2_NR_+mpeak_38978|chr18_60190657_60243744_ZCCHC2_NM_+||	69.3472	1.42512	0.652877	-2.18284	0.0290478	0.150899	2.80489	6.43245	8.0224	10.4909	12.6369	8.19422	49.0856	60.4651	26.7413	249.158	197.135	200.999	12.6638	4.83892	-0.859763	-2.24772	1.38795	ZCCHC2	-	chr18_62564629_+
chr18:45379619-45379821:mpeak_38709|chr18_45368321_45457517_SMAD2_NM_-|	187.295	3.40646	0.361416	-9.42531	4.2883e-21	5.07918e-18	288.904	236.714	374.379	21.856	24.4313	27.9568	185.123	241.86	248.694	187.087	204.717	205.82	133.199	12.4232	3.59957	0.177097	3.42248	SMAD2	-	chr18_47853303_-;chr18_47853349_-;chr18_47853392_-
chr18:32352126-32352183:mpeak_38483|chr18_32073253_32467729_DTNA_NM_+|	72.1093	1.59188	0.741553	-2.14668	0.0318185	0.161548	4.20734	3.85947	1.33707	2.62272	4.21229	5.30214	65.9149	43.7407	56.1568	221.182	231.676	225.1	5.67139	1.79025	-0.368103	-2.03164	1.66354	DTNA	-	chr18_34772219_+
chr17:78929969-78930118:mpeak_37593|chr17_78518624_78938061_RPTOR_NM_+|	7.86376	2.34312	1.08986	-2.14992	0.0315614	0.160833	2.80489	2.57298	4.0112	6.11967	4.21229	4.33812	0	6.43245	1.33707	24.4787	16.8492	21.2086	80.5633	23.4585	-0.643822	-3.0088	2.36498	RPTOR	-	chr17_80956237_+
chr17:76029322-76029426:mpeak_37421|chr17_76000317_76100565_TNRC6C_NM_+mpeak_37421|chr17_76000317_76100565_TNRC6C_NM_+||	36.1435	2.46994	0.79849	-3.09326	0.00197971	0.0232161	18.2318	6.43245	18.7189	4.37119	3.36983	1.92805	32.2562	46.3137	96.2688	57.6997	69.0816	79.0501	24.8133	4.69757	2.16569	-0.235439	2.40112	TNRC6C	-	chr17_78033294_+
chr17:65943826-65943920:mpeak_36980|chr17_65821779_65978367_BPTF_NM_+|	47.03	2.548	0.756147	-3.36972	0.000752457	0.0123293	30.8538	12.8649	66.8533	17.4848	24.4313	22.1726	12.622	45.0272	30.7525	87.4238	111.205	102.669	125.079	21.2709	0.786846	-1.76904	2.55589	BPTF	-	chr17_67947788_+
chr17:62481317-62481401:mpeak_36819|chr17_62474105_62493184_POLG2_NM_-|	6.8796	3.85833	1.54407	-2.49881	0.0124611	0.0844507	25.244	0	14.7077	3.49695	4.21229	4.82013	0	0	5.34827	7.86815	10.1095	6.74818	373.502	50.6732	1.67294	-2.20888	3.88182	POLG2	-	chr17_64485205_-
chr17:60585782-60585866:mpeak_36666|chr17_60556385_60689752_TLK2_NM_+|	78.5592	1.83155	0.605722	-3.02375	0.00249665	0.0267784	12.622	10.2919	5.34827	7.86815	7.58213	13.4964	36.4636	79.7624	68.1904	228.176	243.471	229.438	15.3252	4.12883	-0.034522	-1.92662	1.8921	TLK2	-	chr17_62508473_+;chr17_62508499_+
chr17:48777924-48778071:mpeak_35883|chr17_48773504_48785270_ANKRD40_NM_-|	50.6978	1.33127	0.649463	-2.04981	0.0403834	0.190238	43.4758	20.5838	29.4155	47.2089	35.3833	20.2445	21.0367	54.0326	34.7637	69.9391	127.211	105.079	85.1066	34.0261	-0.137701	-1.46033	1.32263	ANKRD40	-	chr17_50700597_-
chr17:47888835-47888921:mpeak_35819|chr17_47865980_47904762_KAT7_NM_+|	36.765	1.82818	0.652135	-2.80338	0.00505702	0.0449869	16.8293	1.28649	12.0336	25.3529	24.4313	20.7266	16.8293	9.00543	10.6965	108.406	90.9855	104.597	82.5304	23.1953	-1.22571	-3.05681	1.8311	KAT7	-	chr17_49811549_+
chr17:47872747-47872826:mpeak_35817|chr17_47865980_47904762_KAT7_NM_+|	31.1646	4.43308	0.759857	-5.8341	5.40827e-09	9.15102e-07	14.0245	7.71894	2.67413	3.49695	1.68492	3.8561	16.8293	9.00543	10.6965	108.406	90.9855	104.597	66.84	2.97314	1.43385	-3.05681	4.49065	KAT7	-	chr17_49795432_+
chr17:38282429-38282561:mpeak_35149|chr17_38278789_38290531_MSL1_NM_+|	135.057	1.37551	0.650239	-2.11539	0.034397	0.17118	40.6709	10.2919	14.7077	43.7119	19.3765	19.2805	98.1712	96.4868	152.426	368.929	388.373	368.258	18.9207	7.31805	-0.326854	-1.69729	1.37043	MSL1	-	chr17_40126226_+
chr17:27825478-27825605:mpeak_34663|chr17_27717942_27869578_TAOK1_NM_+|	188.661	1.69088	0.536435	-3.15208	0.00162114	0.0205205	15.4269	25.7298	38.7749	69.0648	26.1162	46.7553	103.781	104.206	96.2688	662.673	472.619	602.516	26.2712	8.16755	-0.828405	-2.51391	1.68551	TAOK1	-	chr17_29498520_+
chr17:2295717-2295858:mpeak_33425|chr17_2290943_2304258_MNT_NM_-|	14.9277	2.18009	0.947338	-2.30128	0.0213761	0.120893	23.8416	3.85947	4.0112	8.74238	8.42459	13.0143	12.622	3.85947	5.34827	24.4787	36.2257	34.7049	145.271	31.6335	0.0713839	-2.12784	2.19922	MNT	-	chr17_2392502_-
chr17:2030911-2031079:mpeak_33389|chr17_1964916_2207069_SMG6_NM_-|	45.1879	1.57223	0.707368	-2.22265	0.0262392	0.140035	14.0245	15.4379	10.6965	18.359	1.68492	6.26617	43.4758	57.8921	62.8421	95.292	111.205	105.079	24.4558	8.44421	0.610102	-0.924039	1.53414	SMG6	-	chr17_2127610_-
chr16:9204091-9204235:mpeak_30295|chr16_9185536_9210524_C16orf72_NM_+|	96.9025	2.64521	0.837988	-3.15662	0.00159609	0.0203901	25.244	3.85947	1.33707	14.8621	10.952	8.19422	29.4513	42.4542	65.5163	285.876	362.257	312.826	22.1512	3.53899	-0.15989	-2.80586	2.64598	C16orf72	-	chr16_9110260_+
chr16:3828135-3828191:mpeak_30124|chr16_3779875_3930121_CREBBP_NM_-|	66.4919	1.80087	0.640709	-2.81075	0.0049426	0.0444458	60.3051	29.5893	25.4043	81.3042	53.9173	61.2156	21.0367	11.5784	37.4379	106.657	187.026	122.431	164.588	47.2075	-0.768692	-2.57046	1.80177	CREBBP	-	chr16_3778160_-
chr15:93555588-93555680:mpeak_29500|chr15_93443550_93567601_CHD2_NM_+|	23.8348	1.76359	0.69955	-2.52103	0.0117011	0.0810617	5.60978	9.00543	16.0448	13.1136	11.7944	23.1366	14.0245	12.8649	5.34827	53.3285	64.8693	56.8775	95.1063	27.4422	-0.648016	-2.44116	1.79314	CHD2	-	chr15_93012399_+;chr15_93012436_+
chr15:93482801-93482952:mpeak_29484|chr15_93443550_93567601_CHD2_NM_+|	26.0166	2.03111	0.636305	-3.19204	0.00141274	0.0187709	19.6342	11.5784	13.3707	26.2272	21.0615	13.0143	14.0245	12.8649	5.34827	53.3285	64.8693	56.8775	138.296	34.444	-0.435725	-2.44116	2.00543	CHD2	-	chr15_92939599_+;chr15_92939623_+
chr15:44116679-44116750:mpeak_27539|chr15_44097474_44116951_MFAP1_NM_-|	18.8199	2.76622	0.833851	-3.31741	0.000908563	0.0140078	4.20734	5.14596	14.7077	7.86815	0.842459	4.33812	15.4269	10.2919	14.7077	52.4543	57.2872	38.561	59.5179	8.79872	0.88279	-1.87517	2.75796	MFAP1	-	chr15_43824495_-
chr15:41745089-41745148:mpeak_27332|chr15_41709301_41772778_RTF1_NM_+|	115.739	1.37989	0.520065	-2.65331	0.00797071	0.0624034	32.2562	21.8703	37.4379	41.9634	57.2872	33.7409	44.8782	96.4868	102.954	264.894	347.093	308.006	37.4774	14.4557	-0.538475	-1.91286	1.37438	RTF1	-	chr15_41452935_+
chr14:95583949-95584069:mpeak_26373|chr14_95557000_95624347_DICER1_NM_-|	212.195	1.43939	0.405614	-3.54866	0.000387195	0.00775419	39.2685	20.5838	34.7637	20.9817	21.9039	13.9784	314.148	346.066	262.065	515.801	484.414	472.373	10.2589	3.8615	0.734569	-0.675078	1.40965	DICER1	-	chr14_95117637_-
chr14:93278047-93278105:mpeak_26283|chr14_93260575_93305710_GOLGA5_NM_+|	53.7504	2.59253	0.74516	-3.47915	0.000503003	0.00932975	12.622	10.2919	2.67413	5.24543	0	2.89208	47.6831	86.1949	74.8757	125.89	127.211	149.424	12.2575	3.03242	1.65281	-0.947278	2.60009	GOLGA5	-	chr14_92811731_+;chr14_92811752_+
chr14:70235309-70235387:mpeak_25476|chr14_70233828_70237910_SRSF5_NM_+|	350.148	2.02725	0.534326	-3.79403	0.000148222	0.00382517	11.2196	14.1514	29.4155	27.9756	15.1643	21.6906	169.696	299.752	232.65	980.021	1355.52	1044.52	7.80325	1.91803	-0.242853	-2.2673	2.02445	SRSF5	-	chr14_69768653_+
chr14:58988299-58988470:mpeak_25019|chr14_58894102_59014498_KIAA0586_NM_+|	13.1201	2.05784	0.895345	-2.29837	0.0215407	0.121571	23.8416	6.43245	17.3819	13.1136	14.3218	7.23019	4.20734	2.57298	12.0336	25.3529	12.6369	18.3165	253.301	61.5661	0.459151	-1.5815	2.04065	KIAA0586	-	chr14_58521751_+
chr14:51233050-51233117:mpeak_24640|chr14_51190390_51297839_NIN_NM_-|	15.7238	1.76516	0.853909	-2.06716	0.0387194	0.184602	14.0245	10.2919	8.0224	14.8621	14.3218	4.33812	2.80489	16.7244	8.0224	34.0953	30.3285	30.8488	117.375	35.1853	-0.0518416	-1.78992	1.73808	NIN	-	chr14_50766395_-
chr14:32563495-32563595:mpeak_24148|chr14_32546494_32623826_ARHGAP5_NM_+|	109.715	1.00468	0.336067	-2.98953	0.00279403	0.0292401	124.818	108.065	106.965	68.1906	67.3967	74.712	107.988	104.206	128.358	130.262	176.074	119.539	99.7932	49.3806	0.692446	-0.322552	1.015	ARHGAP5	-	chr14_32094344_+;chr14_32094370_+
chr14:104145799-104145887:mpeak_26764|chr14_104095524_104167537_KLC1_NM_+|	59.5517	2.19321	0.660779	-3.31912	0.000903011	0.0140066	33.6587	9.00543	12.0336	8.74238	6.73967	7.71221	54.6954	92.6273	68.1904	100.537	176.074	144.604	25.3802	5.50651	1.23771	-0.966782	2.20449	KLC1	-	chr14_103679516_+
chr13:48660492-48660603:mpeak_22745|chr13_48651447_48669277_MED4_NM_-|	213.155	1.64712	0.36757	-4.48112	7.42531e-06	0.000379293	117.805	163.384	172.482	257.026	198.82	270.409	93.9638	56.6056	78.8869	340.079	423.757	384.646	197.716	63.2361	-0.67883	-2.32344	1.64461	MED4	-	chr13_48086365_-;chr13_48086416_-
chr13:48657515-48657576:mpeak_22744|chr13_48651447_48669277_MED4_NM_-|	119.698	1.52295	0.619645	-2.45777	0.0139801	0.0910521	11.2196	3.85947	6.68533	5.24543	16.0067	15.4244	93.9638	56.6056	78.8869	340.079	423.757	384.646	9.48519	3.19348	-0.75289	-2.32344	1.57055	MED4	-	chr13_48083399_-
chr13:42773694-42773772:mpeak_22515|chr13_42712177_42830419_DGKH_NR_+mpeak_22515|chr13_42614171_42803234_DGKH_NM_+||	47.5771	1.98916	0.664466	-2.99362	0.00275685	0.0288964	11.2196	18.0109	8.0224	23.6044	16.0067	6.74818	35.0611	29.5893	20.056	141.627	118.787	142.194	43.9788	11.5148	-0.31551	-2.24883	1.93332	DGKH	-	chr13_42199666_+
chr13:35733144-35733280:mpeak_22309|chr13_35516423_36245037_NBEA_NM_+|	47.9176	0.991757	0.445148	-2.22793	0.0258855	0.138552	28.0489	38.5947	49.4715	27.1014	32.0134	42.4171	39.2685	51.4596	38.7749	74.3103	71.609	81.9422	89.6621	44.5586	0.193622	-0.815171	1.00879	NBEA	-	chr13_35159048_+;chr13_35159073_+
chr13:20224139-20224298:mpeak_21756|chr13_20207787_20245973_MPHOSPH8_NM_+|	45.8388	1.5269	0.660441	-2.31194	0.0207812	0.118892	12.622	1.28649	4.0112	9.61662	7.58213	10.6043	26.6465	37.3082	25.4043	125.016	161.752	128.215	20.0536	6.69979	-0.633696	-2.21537	1.58167	MPHOSPH8	-	chr13_19650010_+;chr13_19650127_+
chr13:111953832-111953886:mpeak_23498|chr13_111767623_111955337_ARHGEF7_NM_+|	12.5497	3.80672	1.2552	-3.03275	0.00242336	0.0263194	4.20734	5.14596	2.67413	9.61662	12.6369	2.41006	0	1.28649	2.67413	33.2211	29.4861	47.2373	202.45	22.4328	-1.03605	-4.7949	3.75885	ARHGEF7	-	chr13_111301525_+
chr12:9794528-9794581:mpeak_17139|chr12_9769879_9809516_LOC374443_NR_+|	15.9325	2.06134	0.948271	-2.17379	0.0297211	0.153531	5.60978	1.28649	13.3707	0.874238	2.52738	0.964026	30.8538	28.3028	30.7525	18.359	26.9587	31.3308	22.5416	5.69566	2.21486	0.230209	1.98465	LOC374443	-	chr12_9641983_+
chr12:72037864-72038109:mpeak_19549|chr12_72004345_72057749_ZFC3H1_NM_-|	18.6073	1.89932	0.963807	-1.97064	0.0487647	0.213706	18.2318	38.5947	21.3931	30.5983	42.9654	26.0287	0	3.85947	4.0112	4.37119	20.219	13.0143	662.54	264.841	-0.348507	-2.25635	1.90784	ZFC3H1	-	chr12_71644180_-;chr12_71644208_-
chr12:19460616-19460698:mpeak_17411|chr12_19282625_19528464_PLEKHA5_NM_+|	62.5133	1.44524	0.575212	-2.51254	0.0119866	0.0822689	5.60978	28.3028	33.4267	16.6105	22.7464	20.2445	57.5003	65.611	60.168	122.393	174.389	143.158	36.7413	13.5476	0.1761	-1.26326	1.43936	PLEKHA5	-	chr12_19307785_+
chr12:122262340-122262412:mpeak_21200|chr12_122242637_122267971_SETD1B_NM_+|	176.494	3.92847	0.953095	-4.1218	3.75928e-05	0.00142321	21.0367	1.28649	6.68533	8.74238	5.89721	8.67623	23.8416	27.0163	102.954	484.328	773.377	654.092	18.8597	1.21958	0.315166	-3.63569	3.95086	SETD1B	-	chr12_121824505_+
chr11:73427289-73427407:mpeak_15346|chr11_73389007_73472201_RAB6A_NM_-|	367.275	0.722636	0.353257	-2.04564	0.0407917	0.191292	172.501	95.2003	110.977	69.9391	58.1296	55.9135	668.966	786.046	680.567	519.298	640.269	549.495	17.7318	10.7651	1.0414	0.321423	0.71998	RAB6A	-	chr11_73716361_-
chr11:70050045-70050111:mpeak_15134|chr11_70049268_70052238_FADD_NM_+|	102.604	3.36948	0.756856	-4.45194	8.50985e-06	0.000423665	4.20734	5.14596	0	5.24543	5.89721	8.19422	15.4269	24.4433	12.0336	374.174	414.49	361.992	27.0307	1.68051	-1.04781	-4.47047	3.42266	FADD	-	chr11_70203991_+
chr11:61914113-61914186:mpeak_14379|chr11_61891444_61919233_INCENP_NM_+|	22.6903	3.22241	0.767836	-4.19675	2.70776e-05	0.00107933	11.2196	7.71894	12.0336	22.7302	17.6916	20.2445	2.80489	3.85947	2.67413	45.4604	63.1844	62.6617	331.661	35.4139	-0.969928	-4.19725	3.22732	INCENP	-	chr11_62146679_+;chr11_62146703_+;chr11_62146726_+
chr11:61913101-61913238:mpeak_14378|chr11_61891444_61919233_INCENP_NM_+|	23.367	4.15	0.784119	-5.29257	1.20612e-07	1.24999e-05	22.4391	12.8649	13.3707	20.9817	18.5341	11.5683	2.80489	3.85947	2.67413	45.4604	63.1844	62.6617	521.226	29.8203	-0.069703	-4.19725	4.12754	INCENP	-	chr11_62145682_+
chr11:33360292-33360350:mpeak_13769|chr11_33278217_33374637_HIPK3_NM_+|	63.6126	3.13174	1.1965	-2.61742	0.00885978	0.0670223	22.4391	5.14596	1.33707	0	4.21229	0	61.7076	117.071	161.785	113.651	151.643	124.359	8.49245	3.24311	2.7795	-0.194267	2.97376	HIPK3	-	chr11_33338795_+
chr11:118350899-118350961:mpeak_16335|chr11_118307204_118392611_KMT2A_NM_+|	154.093	0.870939	0.379024	-2.29785	0.0215705	0.121578	85.5492	135.081	104.291	380.294	338.668	374.524	15.4269	21.8703	22.7301	128.513	125.526	116.647	541.29	294.989	-1.75077	-2.62651	0.875737	KMT2A	-	chr11_118480234_+
chr10:93711151-93711207:mpeak_11438|chr10_93683735_93788546_BTAF1_NM_+|	4.35404	3.60368	1.72779	-2.08571	0.0370049	0.178688	5.60978	0	0	2.62272	2.52738	5.30214	0	0	1.33707	11.3651	10.952	12.5323	419.559	29.9926	-0.897795	-4.70399	3.8062	BTAF1	-	chr10_91951439_+
chr10:86152186-86152251:mpeak_11204|chr10_86088344_86273204_CCSER2_NM_+|	31.6542	1.98006	0.659036	-3.00448	0.00266034	0.0281338	4.20734	10.2919	21.3931	4.37119	5.89721	4.33812	42.0734	38.5947	46.7973	72.5618	75.8213	53.5034	28.1585	7.23502	1.29706	-0.663439	1.9605	CCSER2	-	chr10_84392481_+
chr10:80978448-80978507:mpeak_11106|chr10_80828791_81072398_ZMIZ1_NM_+|	100.544	2.23654	0.730082	-3.06341	0.00218831	0.024553	9.81712	0	4.0112	3.49695	7.58213	6.26617	74.3296	36.0217	54.8197	347.073	304.97	358.136	12.5582	1.71705	-0.326915	-2.61258	2.28566	ZMIZ1	-	chr10_79218745_+
chr10:64957167-64957284:mpeak_10564|chr10_64927894_65225761_JMJD1C_NM_-|	21.5215	2.1822	1.09011	-2.00182	0.0453046	0.204031	11.2196	5.14596	22.7301	48.9573	45.4928	53.0214	0	3.85947	0	17.4848	18.5341	31.8129	337.66	217.408	-1.91536	-4.13548	2.22013	JMJD1C	-	chr10_63197413_-
chr10:52279586-52279696:mpeak_10367|chr10_52067081_52383737_SGMS1_NM_-|	36.7134	1.08281	0.508473	-2.12954	0.0332099	0.166744	28.0489	12.8649	25.4043	26.2272	25.2738	22.6546	21.0367	41.1677	26.7413	68.1906	68.2391	74.712	74.5602	35.1212	-0.161152	-1.24721	1.08606	SGMS1	-	chr10_50519915_-
chr10:28878705-28878790:mpeak_9853|chr10_28821516_28908465_WAC_NM_+|	315.917	1.90718	0.554562	-3.43907	0.000583708	0.0103852	11.2196	7.71894	33.4267	15.7363	7.58213	12.5323	337.989	312.617	385.075	820.036	958.718	888.35	5.05611	1.34418	0.546604	-1.36469	1.9113	WAC	-	chr10_28589783_+
chr10:128821459-128821527:mpeak_12768|chr10_128593977_129249595_DOCK1_NM_+|	18.5713	2.45837	0.91711	-2.68056	0.00734986	0.0587635	75.732	41.1677	32.0896	20.9817	13.4793	13.9784	0	5.14596	4.0112	6.99391	2.52738	6.74818	1084.68	297.732	1.62096	-0.829194	2.45015	DOCK1	-	chr10_127023208_+
chr1:9634727-9634886:mpeak_397|chr1_9599527_9642356_SLC25A33_NM_+|	74.9205	3.57362	0.489031	-7.30756	2.72041e-13	1.12774e-10	182.318	127.363	145.74	8.74238	7.58213	9.15825	53.2929	110.638	85.5723	58.574	58.9721	51.0934	182.531	15.1108	4.15961	0.565117	3.59449	SLC25A33	-	chr1_9574807_+
chr1:85643128-85643423:mpeak_3108|chr1_85624932_85666728_SYDE2_NM_-|	27.6652	2.02838	0.88104	-2.30226	0.0213206	0.120804	25.244	33.4488	41.4491	69.9391	48.0201	67.4818	4.20734	1.28649	0	15.7363	12.6369	12.5323	1215.2	453.34	-0.888916	-2.89641	2.0075	SYDE2	-	chr1_85177582_-;chr1_85177661_-
chr1:85121508-85121637:mpeak_3092|chr1_85113290_85156240_SSX2IP_NM_-|	58.3664	1.09615	0.543822	-2.01565	0.0438368	0.20047	29.4513	28.3028	12.0336	12.2393	5.89721	8.19422	110.793	111.925	112.314	107.531	95.1978	66.5178	20.8302	9.77941	1.40622	0.315367	1.09086	SSX2IP	-	chr1_84655834_-
chr1:84552567-84552663:mpeak_3068|chr1_84543657_84700862_PRKACB_NM_+|	28.381	1.54231	0.673283	-2.29074	0.0219787	0.123626	2.80489	10.2919	12.0336	4.37119	0.842459	4.33812	44.8782	47.6001	49.4715	55.077	57.2872	51.5754	17.7037	5.82639	1.39559	-0.207783	1.60338	PRKACB	-	chr1_84086974_+
chr1:82190194-82190288:mpeak_3051|chr1_82165454_82456074_ADGRL2_NM_+|	7.95366	2.68457	1.13271	-2.37004	0.0177861	0.107954	7.01223	3.85947	10.6965	3.49695	6.73967	3.37409	8.41467	3.85947	0	14.8621	7.58213	25.5467	117.147	28.361	0.664165	-1.96714	2.6313	ADGRL2	-	chr1_81724580_+
chr1:46527622-46527752:mpeak_2320|chr1_46509543_46642167_PIK3R3_NM_-|	220.266	2.03051	0.639087	-3.1772	0.00148705	0.0193854	2.80489	18.0109	12.0336	21.856	13.4793	9.15825	103.781	176.249	124.347	604.973	894.691	661.804	8.12344	2.05849	-0.437731	-2.41824	1.98051	PIK3R3	-	chr1_46061983_-
chr1:235383095-235383289:mpeak_8668|chr1_235331967_235491532_ARID4B_NM_-|	21.207	1.83609	0.911189	-2.01504	0.0439001	0.200648	16.8293	1.28649	2.67413	26.2272	24.4313	15.4244	5.60978	2.57298	5.34827	45.4604	58.9721	49.6473	153.647	42.8887	-1.66839	-3.50933	1.84095	ARID4B	-	chr1_235219870_-
chr1:214825065-214825240:mpeak_8020|chr1_214776531_214836933_CENPF_NM_+|	33.5665	1.68977	0.733009	-2.30525	0.0211528	0.120369	12.622	6.43245	10.6965	10.4909	15.1643	17.8345	4.20734	27.0163	25.4043	75.1845	96.0403	101.705	52.5377	15.9344	-0.547732	-2.26894	1.72121	CENPF	-	chr1_214651734_+;chr1_214651785_+;chr1_214651809_+
chr1:212532026-212532133:mpeak_7937|chr1_212458878_212533979_PPP2R5A_NM_+|	44.2282	1.34654	0.609186	-2.21039	0.0270782	0.143319	18.2318	41.1677	14.7077	24.4787	19.3765	21.2086	35.0611	52.7461	33.4267	77.8072	125.526	66.9998	61.1275	24.068	0.187759	-1.15695	1.34471	PPP2R5A	-	chr1_212358777_+
chr1:211564986-211565047:mpeak_7883|chr1_211556096_211605660_LINC00467_NR_+|	15.7412	1.64876	0.795062	-2.07375	0.0381024	0.182605	9.81712	25.7298	30.7525	17.4848	9.26704	17.3525	11.2196	5.14596	9.35947	10.4909	17.6916	24.5827	257.724	83.586	0.588079	-1.03641	1.62449	LINC00467	-	chr1_211391687_+
chr1:200821668-200821858:mpeak_7339|chr1_200708685_200826881_CAMSAP2_NM_+|	69.5523	1.59848	0.63952	-2.4995	0.0124368	0.0843812	15.4269	41.1677	72.2016	76.0587	117.944	69.8919	16.8293	20.5838	24.0672	122.393	139.006	119.057	209.492	69.3627	-1.03487	-2.62953	1.59466	CAMSAP2	-	chr1_200852556_+;chr1_200852592_+;chr1_200852647_+;chr1_200852679_+
chr1:193119425-193119504:mpeak_7197|chr1_193091087_193219805_CDC73_NM_+|	96.4659	0.72461	0.346328	-2.09226	0.0364149	0.177158	78.5369	86.1949	77.5499	73.436	72.4514	73.748	71.5247	120.93	85.5723	128.513	154.17	134.964	87.1432	52.5888	0.141574	-0.587057	0.728632	CDC73	-	chr1_193150361_+
chr1:155648893-155649047:mpeak_5873|chr1_155630724_155658823_YY1AP1_NM_-|	229.766	2.86298	0.617368	-4.63739	3.52837e-06	0.000206012	514.697	156.952	179.167	94.4177	52.2324	63.1437	186.525	243.147	177.83	309.48	429.654	349.941	140.052	19.2635	2.01987	-0.842144	2.86202	YY1AP1	-	chr1_155679202_-
chr1:155408115-155408269:mpeak_5837|chr1_155307542_155532324_ASH1L_NM_-|	124.959	2.3141	0.570754	-4.05447	5.02485e-05	0.00179573	77.1345	25.7298	56.1568	39.3407	29.4861	48.2013	51.8905	97.7733	110.977	288.499	300.758	373.56	61.0117	12.1548	0.442364	-1.8852	2.32756	ASH1L	-	chr1_155438352_-
chr1:150550678-150550933:mpeak_5314|chr1_150549967_150552214_MCL1_NM_-|	187.413	2.96426	0.821014	-3.61049	0.000305621	0.00667409	5.60978	2.57298	1.33707	9.61662	1.68492	4.82013	30.8538	60.4651	65.5163	580.494	815.5	670.48	6.06996	0.780153	-0.759994	-3.71985	2.95986	MCL1	-	chr1_150578285_-
chr1:150416720-150416853:mpeak_5288|chr1_150336586_150443036_RPRD2_NM_+|	212.373	1.98628	0.403159	-4.92678	8.35939e-07	6.47736e-05	25.244	36.0217	29.4155	34.0953	19.3765	18.3165	189.33	173.676	224.627	580.494	605.728	612.156	15.4316	3.99184	0.337054	-1.61371	1.95076	RPRD2	-	chr1_150444372_+
chrX:41197011-41197115:mpeak_84768|chrX_41192560_41223526_DDX3X_NR_+mpeak_84768|chrX_41192560_41206892_DDX3X_NM_+||	266.578	1.89404	0.71188	-2.66062	0.00779981	0.061134	4.20734	6.43245	9.35947	0.874238	5.05475	0.482013	502.075	584.067	478.67	486.077	577.927	543.711	1.27806	0.398765	1.64132	-0.0390213	1.68035	DDX3X	chrX:41197068:+;chrX:41197118:+	chrX_41337831_+;chrX_41337875_+
chr9:130715478-130715598:mpeak_83527|chr9_130705516_130742812_FAM102A_NM_-|	286.924	1.97325	0.679308	-2.9048	0.00367488	0.0357196	4.20734	10.2919	4.0112	5.24543	0.842459	8.19422	224.391	302.325	274.099	664.421	944.396	1000.66	2.31145	0.547317	0.374132	-1.70422	2.07835	FAM102A	chr9:130715475:-	-
chr9:125785872-125785943:mpeak_83276|chr9_125703287_125865369_RABGAP1_NM_+|	263.676	1.66344	0.517415	-3.21491	0.00130484	0.0178817	11.2196	23.1568	14.7077	6.11967	12.6369	6.74818	302.928	405.244	480.007	560.387	671.439	669.516	4.13104	1.34141	0.944492	-0.678265	1.62276	RABGAP1	chr9:125785929:+	-
chr9:123593948-123594003:mpeak_83130|chr9_123580441_123605299_PSMD5_NM_-|	124.827	2.17444	0.655177	-3.31886	0.000903855	0.0140066	9.81712	5.14596	10.6965	5.24543	1.68492	2.41006	136.037	213.557	216.605	270.14	307.497	319.093	4.5319	1.04161	1.45794	-0.663363	2.1213	PSMD5	chr9:123593946:-	chr9_120831654_-
chr8:17411544-17411674:mpeak_77589|chr8_17354596_17422458_SLC7A2_NM_+|	218.512	1.4384	0.646725	-2.22413	0.0261398	0.139732	9.81712	6.43245	10.6965	6.11967	4.21229	9.15825	426.343	201.979	216.605	625.08	504.633	601.07	3.18916	1.12609	0.467327	-1.03453	1.50185	SLC7A2	chr8:17411656:+	chr8_17554128_+
chr8:141582236-141582295:mpeak_80469|chr8_141542251_141645646_AGO2_NM_-|	168.829	1.41114	0.647397	-2.17971	0.0292791	0.15172	4.20734	9.00543	8.0224	2.62272	2.52738	4.82013	213.172	286.887	356.997	358.438	422.072	357.172	2.47769	0.876363	1.09076	-0.408635	1.49939	AGO2	chr8:141582241:-;chr8:141582294:-	chr8_140572144_-;chr8_140572193_-
chr8:11661290-11661350:mpeak_77519|chr8_11653081_11695896_FDFT1_NM_+|	222.238	1.17392	0.576551	-2.0361	0.0417403	0.194706	7.01223	14.1514	20.056	6.11967	5.05475	8.19422	339.392	551.904	356.997	361.06	486.941	509.97	3.30208	1.42629	1.08961	-0.121496	1.2111	FDFT1	chr8:11661344:+	chr8_11803834_+
chr8:109243786-109243852:mpeak_79829|chr8_109214152_109260959_EIF3E_NM_-|	335.096	1.4053	0.577205	-2.43466	0.0149058	0.0951954	9.81712	14.1514	9.35947	5.24543	4.21229	6.74818	398.294	707.57	601.68	657.427	874.472	732.178	1.95181	0.715784	1.04021	-0.407	1.44721	EIF3E	chr8:109243797:-	chr8_108231572_-
chr8:102507205-102507265:mpeak_79612|chr8_102504667_102678816_GRHL2_NM_+|	137.767	1.78229	0.831894	-2.14245	0.0321573	0.162968	2.80489	5.14596	1.33707	3.49695	5.89721	2.89208	54.6954	105.492	144.403	403.024	477.674	446.344	3.04931	0.925837	-0.403616	-2.12327	1.71965	GRHL2	chr8:102507255:+	chr8_101495033_+
chr7:80455101-80455166:mpeak_75179|chr7_80374623_80548667_SEMA3C_NM_-|	490.519	2.22212	0.548966	-4.04782	5.16966e-05	0.0018239	9.81712	15.4379	30.7525	1.74848	4.21229	3.37409	1084.09	1061.35	1108.43	820.91	850.041	896.062	1.72126	0.363647	2.58492	0.342068	2.24285	SEMA3C	chr7:80455107:-	chr7_80825794_-
chr7:75694126-75694277:mpeak_75057|chr7_75677336_75695596_MDH2_NM_+|	1757.81	1.73949	0.759452	-2.29046	0.0219947	0.123633	37.866	7.71894	8.0224	2.62272	0.842459	3.37409	4786.55	4744.58	4895	1909.34	2524.85	2172.91	0.371599	0.103514	2.97052	1.12659	1.84392	MDH2	chr7:75694271:+	chr7_76064953_+
chr7:756256-756334:mpeak_73112|chr7_590239_767313_PRKAR1B_NM_-|	133.771	2.3876	0.82633	-2.8894	0.00385977	0.0370386	8.41467	10.2919	10.6965	0.874238	0.842459	1.44604	384.27	307.471	290.143	180.093	256.95	153.762	2.99456	0.535326	3.21672	0.732871	2.48385	PRKAR1B	chr7:756255:-	chr7_716604_-;chr7_716679_-
chr6:86268675-86268741:mpeak_71067|chr6_86215723_86303874_SNX14_NM_-|	147.41	1.76836	0.703409	-2.51399	0.0119374	0.0821354	12.622	12.8649	6.68533	2.62272	5.89721	2.41006	165.489	371.796	280.784	232.547	364.785	310.416	3.93271	1.20408	1.55752	-0.150071	1.7076	SNX14	chr6:86268685:-	chr6_85558972_-
chr6:24710103-24710168:mpeak_69110|chr6_24706490_24719403_C6orf62_NM_-|	267.239	1.53295	0.646378	-2.3716	0.0177115	0.107658	18.2318	24.4433	1.33707	3.49695	6.73967	9.64026	441.77	425.828	462.625	618.087	569.502	625.171	3.30863	1.0965	1.14681	-0.446519	1.59333	C6orf62	chr6:24710113:-	chr6_24709889_-;chr6_24709957_-
chr6:160434827-160434879:mpeak_72913|chr6_160390130_160525705_IGF2R_NM_+|	77.9128	2.76058	0.891816	-3.09546	0.00196506	0.0230769	4.20734	6.43245	10.6965	0.874238	1.68492	0.964026	88.354	192.974	155.1	156.489	180.286	136.892	4.88886	0.743811	2.59836	-0.11813	2.71649	IGF2R	chr6:160434877:+	chr6_160013845_+
chr6:152134820-152134994:mpeak_72633|chr6_152011630_152419866_ESR1_NM_+|	414.386	3.53921	0.702621	-5.03715	4.72512e-07	4.11387e-05	5.60978	7.71894	6.68533	0	5.89721	1.44604	410.916	263.731	315.548	1382.17	1299.91	1273	2.02122	0.278499	1.44652	-1.99792	3.44445	ESR1	chr6:152134875:+;chr6:152134992:+	chr6_151813852_+
chr6:152132252-152132556:mpeak_72628|chr6_152011630_152419866_ESR1_NM_+|	420.051	1.89947	0.528606	-3.59335	0.000326448	0.00693995	4.20734	16.7244	25.4043	13.1136	15.1643	20.7266	410.916	263.731	315.548	1382.17	1299.91	1273	4.67948	1.23902	-0.080778	-1.99792	1.91714	ESR1	chr6:152132393:+;chr6:152132516:+	chr6_151811256_+;chr6_151811379_+
chr6:13618286-13618376:mpeak_68847|chr6_13615558_13620985_NOL7_NM_+|	204.791	1.35454	0.606731	-2.23252	0.0255809	0.137276	7.01223	5.14596	8.0224	7.86815	3.36983	2.89208	260.855	319.05	324.907	434.496	515.585	568.293	2.23036	0.930604	0.514201	-0.746838	1.26104	NOL7	chr6:13618351:+	chr6_13618059_+
chr6:128504841-128505006:mpeak_71976|chr6_128291425_128841819_PTPRK_NM_-|	124.43	2.71319	0.839484	-3.23198	0.00122937	0.0171339	4.20734	6.43245	10.6965	1.74848	2.52738	0.482013	147.257	267.59	227.301	213.314	337.826	273.783	3.32265	0.576765	2.16493	-0.361354	2.52628	PTPRK	chr6:128504839:-	chr6_128183696_-;chr6_128183775_-
chr6:127633767-127633835:mpeak_71951|chr6_127611422_127664754_ECHDC1_NM_-|	204.974	1.86384	0.787055	-2.36812	0.0178789	0.108358	0	9.00543	14.7077	0	4.21229	0.482013	504.88	506.877	480.007	311.229	299.073	329.215	2.38441	0.749477	2.3367	0.667029	1.66968	ECHDC1	chr6:127633776:-	chr6_127312626_-
chr6:108275796-108275848:mpeak_71515|chr6_108193051_108279482_SEC63_NM_-|	239.488	3.139	0.970978	-3.23283	0.00122572	0.0171339	5.60978	1.28649	21.3931	1.74848	0	0.964026	488.051	590.499	458.614	372.426	507.16	426.099	1.84036	0.311618	3.38256	0.235464	3.1471	SEC63	chr6:108275794:-	chr6_107954592_-
chr5:149919279-149919337:mpeak_67552|chr5_149877339_149932774_NDST1_NM_+|	295.717	1.77839	0.631477	-2.81624	0.00485901	0.0440576	9.81712	6.43245	1.33707	2.62272	3.36983	3.8561	391.282	446.412	336.941	771.952	789.384	785.199	1.4972	0.41971	0.836481	-0.998319	1.8348	NDST1	chr5:149919330:+	chr5_150539771_+
chr5:139608441-139608493:mpeak_67131|chr5_139554652_139622889_CYSTM1_NM_+|	118.507	2.01364	0.918402	-2.19255	0.0283399	0.148337	11.2196	1.28649	9.35947	0.874238	0	1.92805	199.147	402.672	260.728	177.47	198.82	158.582	2.535	0.785876	2.96398	0.689407	2.27457	CYSTM1	chr5:139608495:+	chr5_140228908_+
chr5:139005534-139005589:mpeak_67101|chr5_138940750_139006340_UBE2D2_NM_+|	322.556	2.6825	0.791525	-3.38903	0.000701413	0.0116961	9.81712	9.00543	4.0112	0.874238	2.52738	0.482013	565.185	714.002	675.219	624.206	620.892	644.451	1.16832	0.205532	2.55569	0.0486881	2.507	UBE2D2	chr5:139005591:+	chr5_139625999_+
chr5:133724983-133725045:mpeak_66792|chr5_133706866_133725915_UBE2B_NM_+|	236.363	1.41765	0.681563	-2.08	0.0375257	0.180872	1.40245	7.71894	8.0224	2.62272	1.68492	4.82013	287.501	441.266	381.064	491.322	637.741	571.185	1.54472	0.536849	0.909353	-0.615405	1.52476	UBE2B	chr5:133725045:+	chr5_134389351_+
chr4:77909538-77909623:mpeak_61554|chr4_77870866_77955649_SEPT11_NM_+|	285.983	1.52772	0.667551	-2.28854	0.0221061	0.124007	8.41467	21.8703	9.35947	0.874238	2.52738	4.33812	894.76	683.126	513.434	434.496	473.462	385.128	1.89567	0.598547	2.35676	0.693595	1.66317	SEPT11	chr4:77909620:+	chr4_76988466_+
chr4:109572180-109572230:mpeak_62327|chr4_109571740_109588402_OSTC_NM_+|	1595.87	1.60971	0.812489	-1.98121	0.0475682	0.210243	7.01223	12.8649	4.0112	3.49695	1.68492	0	3695.44	5189.7	3541.89	1717	2598.14	2379.22	0.192229	0.11611	2.20476	0.892464	1.3123	OSTC	chr4:109572233:+	chr4_108651074_+
chr3:9472178-9472236:mpeak_54375|chr3_9439383_9517166_SETD5_NM_+|	855.993	2.19043	0.672817	-3.25561	0.0011315	0.0162306	0	12.8649	2.67413	4.37119	6.73967	3.8561	544.149	757.743	685.915	2319.35	3095.19	2839.06	1.17258	0.181339	0.0541156	-2.05385	2.10796	SETD5	chr3:9472236:+	chr3_9430546_+
chr3:71246912-71247090:mpeak_56390|chr3_71008542_71633140_FOXP1_NM_-|	555.019	2.11376	0.659986	-3.20273	0.0013613	0.0183819	0	6.43245	14.7077	3.49695	4.21229	3.37409	597.442	636.813	826.307	1316.6	1505.47	1745.37	1.53891	0.242659	0.931596	-1.14835	2.07995	FOXP1	chr3:71247033:-	chr3_71197887_-
chr3:63999048-63999326:mpeak_56242|chr3_63996440_64009686_PSMD6_NM_-|	1313.65	2.04901	0.556735	-3.6804	0.000232865	0.00540808	28.0489	15.4379	12.0336	4.37119	7.58213	4.33812	1730.62	2700.34	2731.63	2516.93	3244.31	2768.2	0.775144	0.191002	1.7689	-0.25197	2.02087	PSMD6	chr3:63999061:-	-
chr3:196509598-196509709:mpeak_59693|chr3_196466727_196555189_PAK2_NM_+|	623.888	1.01675	0.311851	-3.26037	0.00111268	0.0159883	58.9027	46.3137	46.7973	19.2332	21.0615	14.9424	1438.91	1411.28	1385.2	1051.71	1024.43	967.882	3.58913	1.81461	1.46049	0.476517	0.983975	PAK2	chr3:196509705:+	chr3_196782833_+
chr3:176913354-176913422:mpeak_58990|chr3_176743312_176915048_TBL1XR1_NM_-|	209.385	1.72113	0.776351	-2.21695	0.0266265	0.141604	2.80489	0	18.7189	3.49695	3.36983	2.41006	406.709	298.466	336.941	500.939	445.661	493.099	3.0981	0.644361	1.21423	-0.466251	1.68048	TBL1XR1	chr3:176913366:-	chr3_177195566_-
chr3:133921453-133921655:mpeak_57817|chr3_133877108_133969586_RYK_NM_-|	161.131	1.3565	0.627153	-2.16295	0.0305449	0.156519	14.0245	16.7244	12.0336	4.37119	7.58213	4.33812	194.94	430.974	334.267	229.925	334.456	349.941	4.45566	1.7818	1.3929	0.0706036	1.3223	RYK	chr3:133921422:-	chr3_134202753_-
chr3:119393229-119393359:mpeak_57106|chr3_119388512_119396243_COX17_NM_-|	714.511	1.87902	0.633303	-2.96701	0.00300706	0.0308855	28.0489	24.4433	8.0224	0.874238	4.21229	2.41006	1551.1	2145.87	2143.32	875.987	850.883	938.961	1.03616	0.28121	3.01298	1.13145	1.88152	COX17	chr3:119393250:-	chr3_119674404_-;chr3_119674434_-
chr3:10041488-10041543:mpeak_54462|chr3_10028576_10044400_EMC3-AS1_NR_+|	106.753	4.13886	1.25399	-3.30056	0.000964932	0.0144932	9.81712	9.00543	9.35947	0.874238	0	0	252.44	270.163	324.907	137.255	145.745	121.467	3.32527	0.648436	5.0106	1.06721	3.9434	EMC3-AS1	chr3:10041526:+	chr3_9999859_+
chr21:46196777-46196899:mpeak_52653|chr21_46191404_46221751_UBE2G2_NM_-|	191.672	1.35216	0.547596	-2.46926	0.0135392	0.089161	12.622	14.1514	18.7189	3.49695	2.52738	3.8561	567.99	446.412	415.828	270.14	279.696	264.625	3.18077	1.21313	2.20298	0.81233	1.39065	UBE2G2	chr21:46196775:-;chr21:46196823:-	-
chr20:46365261-46365313:mpeak_50961|chr20_46287136_46415360_SULF2_NM_-|	328.385	2.85783	0.75887	-3.7659	0.000165948	0.00418199	8.41467	16.7244	5.34827	2.62272	0.842459	0.964026	720.857	515.883	744.746	619.835	620.892	683.494	1.53861	0.230181	2.78309	0.0423078	2.74078	SULF2	chr20:46365270:-	chr20_47736517_-
chr20:46335254-46335310:mpeak_50953|chr20_46287136_46415360_SULF2_NM_-|	330.823	1.35522	0.575297	-2.35568	0.0184887	0.110679	26.6465	12.8649	6.68533	4.37119	9.26704	4.33812	720.857	515.883	744.746	619.835	620.892	683.494	2.33142	0.934214	1.36169	0.0423078	1.31938	SULF2	chr20:46335257:-	chr20_47706514_-
chr20:46329767-46329975:mpeak_50952|chr20_46287136_46415360_SULF2_NM_-|	332.159	0.942823	0.453885	-2.07723	0.0377806	0.181483	16.8293	20.5838	16.0448	6.99391	10.1095	9.64026	720.857	515.883	744.746	619.835	620.892	683.494	2.69787	1.38984	0.999208	0.0423078	0.9569	SULF2	chr20:46329767:-;chr20:46329793:-;chr20:46329838:-	chr20_47701053_-;chr20_47701094_-
chr20:46258962-46259022:mpeak_50910|chr20_46130600_46282149_NCOA3_NM_+|	1670.68	2.57363	0.658893	-3.90599	9.38392e-05	0.00275894	9.81712	5.14596	8.0224	4.37119	3.36983	1.92805	1579.15	1783.08	2607.28	4448.12	4348.77	5249.12	0.385048	0.0688386	1.24927	-1.23448	2.48375	NCOA3	chr20:46259018:+	chr20_47630271_+
chr20:44984626-44984683:mpeak_50834|chr20_44979163_44993097_SLC35C2_NM_-|	124.071	4.55667	1.13947	-3.99894	6.36275e-05	0.00210174	4.20734	11.5784	13.3707	0.874238	0.842459	0	213.172	274.022	205.908	211.566	314.237	239.078	4.20665	0.33666	4.08611	-0.142167	4.22827	SLC35C2	chr20:44984630:-	chr20_46355994_-
chr2:86363936-86364032:mpeak_45437|chr2_86333304_86364591_PTCD3_NM_+|	135.881	4.31219	1.15119	-3.74585	0.000179787	0.00446292	8.41467	3.85947	14.7077	0	1.68492	0	315.55	281.741	196.549	251.781	250.21	306.078	3.3989	0.625535	4.00124	-0.0256297	4.02687	PTCD3	chr2:86364004:+;chr2:86364078:+	chr2_86136864_+;chr2_86136950_+
chr2:219268377-219268504:mpeak_48802|chr2_219263060_219269019_CTDSP1_NM_+|	189.934	1.36646	0.635738	-2.14942	0.0316015	0.16084	8.41467	2.57298	8.0224	9.61662	4.21229	7.71221	169.696	245.72	148.414	479.083	679.022	516.718	3.37159	1.28617	-0.180331	-1.57068	1.39034	CTDSP1	chr2:219268384:+;chr2:219268426:+;chr2:219268498:+	chr2_218403674_+;chr2_218403792_+
chr2:192208743-192208804:mpeak_48075|chr2_192110106_192288562_MYO1B_NM_+|	187.499	1.727	0.646148	-2.67277	0.0075228	0.0598002	11.2196	10.2919	2.67413	1.74848	3.36983	3.8561	265.062	382.088	319.559	472.089	427.127	350.905	2.50185	0.717884	1.43026	-0.370914	1.80117	MYO1B	chr2:192208795:+	chr2_191344067_+
chr19:54683372-54683434:mpeak_42530|chr19_54678125_54693733_MBOAT7_NM_-|	142.248	1.46985	0.728102	-2.01874	0.0435147	0.199436	7.01223	6.43245	10.6965	0.874238	4.21229	1.44604	373.05	349.925	255.38	222.931	292.333	182.683	2.46753	0.93597	1.88578	0.487242	1.39853	MBOAT7	chr19:54683381:-	chr19_54179666_-
chr18:12341261-12341320:mpeak_38090|chr18_12329782_12377275_AFG3L2_NM_-|	317.499	1.21231	0.49987	-2.42525	0.0152978	0.0969678	16.8293	10.2919	25.4043	4.37119	10.952	9.15825	596.039	647.105	532.153	545.525	772.535	639.631	2.95869	1.25052	1.10133	-0.141093	1.24243	AFG3L2	chr18:12341260:-	-
chr17:80580735-80580788:mpeak_37789|chr17_80573901_80606411_WDR45B_NM_-|	276.402	2.24327	0.876844	-2.55835	0.0105171	0.0753651	7.01223	2.57298	14.7077	0	0.842459	2.41006	409.514	801.484	647.14	381.168	550.125	499.847	1.30738	0.340902	2.90091	0.376692	2.52421	WDR45B	chr17:80580735:-	chr17_82622860_-
chr17:76178529-76178607:mpeak_37444|chr17_76171031_76183285_TK1_NM_-|	330.513	1.713	0.743354	-2.30442	0.0211992	0.120468	8.41467	7.71894	9.35947	4.37119	0	0.482013	955.065	753.883	858.397	460.724	486.941	420.797	0.992974	0.53197	2.3931	0.907722	1.48537	TK1	chr17:76178552:-	chr17_78182472_-
chr17:60075301-60075366:mpeak_36626|chr17_60023961_60142643_MED13_NM_-|	196.62	2.00563	0.651555	-3.07823	0.00208237	0.0238796	8.41467	7.71894	4.0112	2.62272	6.73967	3.8561	147.257	245.72	252.706	483.454	590.563	606.372	3.11993	0.786632	0.607851	-1.3799	1.98775	MED13	chr17:60075304:-	chr17_61997940_-
chr17:57969874-57969943:mpeak_36358|chr17_57937785_57970306_TUBD1_NM_-|	199.861	2.57138	0.608963	-4.22255	2.41551e-05	0.000986655	2.80489	11.5784	16.0448	4.37119	4.21229	4.33812	182.318	223.849	266.076	451.981	620.05	610.71	4.52635	0.76789	1.23562	-1.32376	2.55938	TUBD1	chr17:57969882:-	chr17_59892530_-
chr17:38796821-38796877:mpeak_35229|chr17_38785245_38804103_SMARCE1_NM_-|	319.686	1.09767	0.508074	-2.16046	0.0307374	0.157117	12.622	19.2974	4.0112	9.61662	5.89721	9.64026	503.478	461.85	534.827	652.182	859.308	763.509	2.39512	1.10568	0.514419	-0.600754	1.11517	SMARCE1	chr17:38796826:-	chr17_40640575_-
chr17:2236685-2236736:mpeak_33414|chr17_2227668_2240678_TSR1_NM_-|	154.699	1.35561	0.625126	-2.16854	0.0301179	0.15529	14.0245	5.14596	2.67413	0.874238	6.73967	3.37409	235.611	270.163	287.469	334.833	341.196	354.28	2.75383	1.06648	0.991345	-0.377241	1.36859	TSR1	chr17:2236685:-	chr17_2333374_-;chr17_2333418_-
chr16:66847326-66847540:mpeak_31925|chr16_66837021_66864879_NAE1_NM_-|	278.763	1.50842	0.628777	-2.39897	0.0164411	0.101575	50.488	21.8703	20.056	13.9878	6.73967	3.37409	486.648	702.424	704.634	381.168	491.996	461.768	4.88008	1.80545	1.93899	0.504446	1.43454	NAE1	chr16:66847388:-;chr16:66847466:-	chr16_66813426_-;chr16_66813506_-;chr16_66813563_-
chr16:14985245-14985301:mpeak_30541|chr16_14927642_14989370_NOMO1_NM_+|	288.779	1.51535	0.691635	-2.19097	0.0284541	0.148747	2.80489	15.4379	18.7189	2.62272	4.21229	0.964026	661.954	910.835	651.151	359.312	413.647	423.689	1.66199	0.65174	2.24466	0.894119	1.35055	NOMO1	chr16:14985300:+	chr16_14891440_+
chr15:96872428-96872514:mpeak_29515|chr15_96869156_96880576_NR2F2_NM_+mpeak_29515|chr15_96869156_96880576_NR2F2_NM_+||	486.499	2.7338	0.767278	-3.56299	0.00036666	0.00745093	2.80489	2.57298	6.68533	1.74848	0	7.71221	270.672	254.725	278.11	1532.54	1494.52	1985.89	1.50132	0.283087	0.350597	-2.64128	2.99188	NR2F2	chr15:96872516:+	chr15_96329306_+
chr14:39620968-39621053:mpeak_24381|chr14_39619585_39639634_TRAPPC6B_NM_-|	112.713	1.23853	0.609067	-2.03349	0.0420028	0.194877	5.60978	9.00543	12.0336	1.74848	3.36983	4.33812	267.867	208.411	220.616	235.17	205.56	178.827	3.82394	1.52632	1.4947	0.169704	1.325	TRAPPC6B	chr14:39620975:-	chr14_39151772_-
chr12:54667740-54667794:mpeak_18725|chr12_54635689_54673915_CBX5_NM_-|	1567.55	0.912126	0.431873	-2.11203	0.0346843	0.171887	18.2318	25.7298	14.7077	6.11967	7.58213	8.67623	4050.26	3356.45	3397.49	2676.04	2443.97	2805.32	0.543023	0.282361	1.39052	0.447049	0.943474	CBX5	chr12:54667704:-;chr12:54667743:-	chr12_54273959_-
chr12:54639898-54640006:mpeak_18721|chr12_54635689_54673915_CBX5_NM_-|	1566.96	1.44599	0.632438	-2.28638	0.0222321	0.124545	37.866	6.43245	14.7077	4.37119	3.36983	7.23019	4050.26	3356.45	3397.49	2676.04	2443.97	2805.32	0.546141	0.188903	1.97867	0.447049	1.53163	CBX5	chr12:54639898:-	chr12_54246154_-
chr12:53421805-53422014:mpeak_18546|chr12_53400041_53433926_EIF4B_NM_+|	393.616	1.61916	0.425749	-3.80309	0.000142901	0.00372575	40.6709	27.0163	36.1008	19.2332	14.3218	7.23019	643.722	760.316	728.701	809.545	871.102	765.437	4.86642	1.66737	1.34752	-0.197766	1.54529	EIF4B	chr12:53421892:+;chr12:53421927:+	chr12_53028144_+
chr12:133267936-133267988:mpeak_21651|chr12_133264191_133281204_PXMP2_NM_+|	252.901	1.86841	0.786126	-2.37673	0.017467	0.106328	11.2196	9.00543	18.7189	0	3.36983	1.44604	964.882	595.645	504.074	264.894	385.846	275.711	1.88627	0.779729	3.01553	1.15608	1.85945	PXMP2	chr12:133267993:+	chr12_132691402_+
chr12:118480438-118480493:mpeak_20953|chr12_118472163_118499979_WSB2_NM_-|	190.64	1.97236	0.747969	-2.63695	0.00836542	0.0644589	11.2196	20.5838	5.34827	3.49695	0	0.964026	558.173	524.888	485.355	199.326	249.368	228.956	2.36874	0.987452	3.05799	1.2107	1.8473	WSB2	chr12:118480437:-;chr12:118480462:-	chr12_118042633_-
chr12:102302149-102302201:mpeak_20251|chr12_102271104_102314993_DRAM1_NM_+|	188.867	1.21509	0.617523	-1.96769	0.0491041	0.214614	0	7.71894	12.0336	2.62272	3.36983	5.30214	349.209	302.325	282.121	413.515	418.702	469.481	3.17342	0.86769	0.806394	-0.479432	1.28583	DRAM1	chr12:102302202:+	chr12_101908421_+
chr11:68349807-68349868:mpeak_15053|chr11_68228185_68380533_PPP6R3_NM_+|	244.926	1.11283	0.530214	-2.09883	0.0358316	0.1761	14.0245	14.1514	17.3819	11.3651	11.7944	6.26617	281.891	454.131	486.692	460.724	569.502	611.192	3.72595	1.7927	0.630619	-0.424855	1.05547	PPP6R3	chr11:68349860:+	chr11_68582390_+
chr11:66251241-66251299:mpeak_14853|chr11_66247483_66276549_DPP3_NM_+|	116.775	1.71827	0.739085	-2.32487	0.0200791	0.11658	4.20734	14.1514	14.7077	2.62272	1.68492	0.964026	248.233	321.623	352.986	127.639	172.704	139.784	3.58312	1.19776	2.64904	1.06816	1.58088	DPP3	chr11:66251300:+	chr11_66483828_+
chr10:75511778-75511839:mpeak_10957|chr10_75504130_75530712_SEC24C_NM_+|	105.301	3.94218	1.16287	-3.39005	0.000698801	0.011681	4.20734	6.43245	13.3707	0	1.68492	0	193.537	267.59	197.886	147.746	195.45	235.704	3.64339	0.873163	3.83291	0.186991	3.64592	SEC24C	chr10:75511837:+	chr10_73752101_+
chr10:3176666-3176779:mpeak_9072|chr10_3109711_3178641_PFKP_NM_+|	733.012	1.59815	0.759002	-2.1056	0.0352394	0.174325	25.244	7.71894	2.67413	0.874238	4.21229	1.92805	2189.22	1703.31	1609.83	1000.13	1232.52	1018.49	0.647669	0.215758	2.34495	0.759105	1.58585	PFKP	chr10:3176747:+;chr10:3176775:+	chr10_3134521_+;chr10_3134556_+;chr10_3134580_+
chr10:28828832-28828899:mpeak_9850|chr10_28821516_28908465_WAC_NM_+|	312.902	1.37001	0.531789	-2.57623	0.00998844	0.0727717	7.01223	16.7244	2.67413	6.11967	8.42459	11.0863	337.989	312.617	385.075	820.036	958.718	888.35	2.55008	0.960988	0.0432599	-1.36469	1.40795	WAC	chr10:28828893:+	chr10_28539962_+
chr10:104901804-104901877:mpeak_12061|chr10_104849665_104953063_NT5C2_NM_-|	147.644	1.92198	0.741339	-2.59258	0.00952603	0.0703955	5.60978	10.2919	8.0224	0	0	3.37409	361.831	312.617	335.604	208.943	250.21	275.229	2.3686	1.37834	2.82589	0.459826	2.36607	NT5C2	chr10:104901805:-	chr10_103142051_-
chr1:53717344-53717406:mpeak_2572|chr1_53712728_53793821_LRP8_NM_-|	170.969	1.518	0.615555	-2.46607	0.0136606	0.0898174	7.01223	7.71894	14.7077	1.74848	0.842459	6.26617	385.672	290.747	323.57	319.097	356.36	337.891	2.94392	0.874044	1.73282	-0.0191451	1.75196	LRP8	chr1:53717348:-	chr1_53251678_-
chr1:46775818-46775933:mpeak_2344|chr1_46769284_46782223_UQCRH_NM_+|	2002.07	2.62588	1.00858	-2.60353	0.0092268	0.0688563	18.2318	11.5784	0	0.874238	0.842459	0.482013	5668.68	6049.08	5075.51	2015.12	2877	2307.4	0.266269	0.0305397	3.76108	1.22191	2.53916	UQCRH	chr1:46775932:+;chr1:46775970:+	chr1_46310278_+
chr1:21936916-21936968:mpeak_935|chr1_21923757_21995856_RAP1GAP_NM_-|	100.842	2.56283	0.951972	-2.69213	0.00709971	0.057428	8.41467	1.28649	14.7077	0	0	1.92805	246.83	271.449	201.897	147.746	189.553	126.287	3.38929	1.2477	3.66219	0.635512	3.02668	RAP1GAP	chr1:21936914:-	chr1_21610422_-
chr1:19209056-19209108:mpeak_787|chr1_19199451_19229293_ALDH4A1_NM_-|	277.968	2.21164	0.796296	-2.77741	0.00547947	0.0478032	8.41467	5.14596	12.0336	2.62272	2.52738	0	788.174	617.515	463.962	424.88	544.228	466.107	1.36893	0.538257	2.31315	0.381503	1.93165	ALDH4A1	chr1:19209053:-	chr1_18882564_-
chr1:179826941-179827009:mpeak_6811|chr1_179815963_179846941_TOR1AIP2_NM_-|	133.092	1.90092	0.702307	-2.70668	0.00679604	0.0557329	7.01223	3.85947	9.35947	0	2.52738	5.30214	214.574	171.103	197.886	414.389	267.902	303.186	3.46683	1.19174	1.36958	-0.755933	2.12552	TOR1AIP2	chr1:179826957:-	chr1_179857823_-
chr1:153617445-153617509:mpeak_5609|chr1_153606457_153617539_CHTOP_NM_+|	188.8	3.20441	0.688275	-4.65571	3.22866e-06	0.000192581	5.60978	12.8649	12.0336	5.24543	4.21229	0	194.94	252.152	209.919	448.484	621.734	498.401	4.64349	0.904399	1.68964	-1.25551	2.94514	CHTOP	chr1:153617508:+	chr1_153645032_+
chr1:114941865-114942108:mpeak_4230|chr1_114940482_115053781_TRIM33_NM_-|	342.309	1.88131	0.621226	-3.02838	0.00245872	0.0265779	4.20734	10.2919	6.68533	0.874238	7.58213	6.26617	298.721	393.666	423.85	827.904	1008.42	1119.23	1.89786	0.49813	0.524989	-1.40479	1.92978	TRIM33	chr1:114941862:-;chr1:114941971:-	chr1_114399243_-;chr1_114399352_-
chrX:53589066-53589185:mpeak_85081|chrX_53560372_53713674_HUWE1_NM_-|	181.629	1.75299	0.744758	-2.35378	0.0185838	0.110688	30.8538	12.8649	6.68533	2.62272	10.1095	1.44604	429.148	351.212	338.278	345.324	342.038	308.97	4.50584	1.42304	1.82986	0.167044	1.66282	HUWE1	-	chrX_53562137_-
chr8:98731291-98731422:mpeak_79406|chr8_98656406_98736827_MTDH_NM_+|	726.566	1.46359	0.636641	-2.29893	0.021509	0.121501	5.60978	2.57298	16.0448	3.49695	0.842459	3.37409	1601.59	1550.22	1361.13	1270.27	1436.39	1467.25	0.536846	0.184803	1.65119	0.112671	1.53852	MTDH	-	chr8_97719055_+;chr8_97719121_+;chr8_97719177_+
chr7:66417656-66417718:mpeak_74784|chr7_66386202_66420488_TMEM248_NM_+|	221.81	1.35936	0.672462	-2.02146	0.043232	0.19847	14.0245	2.57298	8.0224	3.49695	2.52738	1.44604	452.99	532.607	533.49	312.977	415.332	382.236	1.6207	0.672675	1.72057	0.451935	1.26863	TMEM248	-	chr7_66952727_+
chr7:27825025-27825119:mpeak_73902|chr7_27778991_27868246_TAX1BP1_NM_+|	430.014	1.30908	0.58279	-2.24624	0.0246887	0.133647	64.5125	15.4379	30.7525	13.1136	9.26704	10.1223	830.248	1066.5	1008.15	558.638	839.089	714.343	3.81091	1.53891	1.76805	0.459829	1.30822	TAX1BP1	-	chr7_27785413_+;chr7_27785461_+;chr7_27785486_+
chr5:56542119-56542192:mpeak_64756|chr5_56469774_56558420_GPBP1_NM_+|	179.106	1.9046	0.878734	-2.16744	0.0302013	0.155527	12.622	0	4.0112	9.61662	0.842459	2.89208	119.208	226.422	191.201	482.58	541.701	558.171	4.64761	0.843701	0.317101	-1.55962	1.87672	GPBP1	-	chr5_57246296_+
chr3:9510390-9510454:mpeak_54388|chr3_9439383_9517166_SETD5_NM_+|	861.62	1.69062	0.628816	-2.68858	0.00717565	0.0578637	26.6465	15.4379	1.33707	14.8621	15.1643	24.5827	544.149	757.743	685.915	2319.35	3095.19	2839.06	2.18439	0.661638	-0.330731	-2.05385	1.72312	SETD5	-	chr3_9468761_+
chr22:42483053-42483120:mpeak_53965|chr22_42482318_42486888_NDUFA6_NM_-|	339.163	1.15078	0.486941	-2.36328	0.018114	0.109383	22.4391	14.1514	14.7077	6.11967	2.52738	4.33812	844.272	891.538	826.307	458.975	522.324	462.25	2.00218	0.89953	1.98205	0.827715	1.15433	NDUFA6	-	chr22_42087059_-;chr22_42087122_-
chr20:32439880-32440017:mpeak_50320|chr20_32399109_32441301_CHMP4B_NM_+|	703.915	0.858836	0.429088	-2.00154	0.0453345	0.204054	93.9638	64.3245	45.4603	28.8499	26.1162	29.8848	1395.43	1638.99	1603.14	983.518	1543.38	993.911	4.39344	2.40998	1.26379	0.397459	0.86633	CHMP4B	-	chr20_33852098_+;chr20_33852124_+;chr20_33852195_+
chr18:199190-199245:mpeak_37832|chr18_158482_211132_USP14_NM_+|	249.167	1.3429	0.597332	-2.24816	0.024566	0.133209	37.866	14.1514	10.6965	8.74238	4.21229	3.37409	532.929	595.645	655.163	340.953	386.688	399.589	3.51587	1.44857	1.94137	0.662121	1.27925	USP14	-	chr18_199248_+
chr17:7792970-7793094:mpeak_33834|chr17_7788122_7814781_CHD3_NM_+|	719.103	1.21204	0.580324	-2.08856	0.0367476	0.178276	22.4391	10.2919	16.0448	6.11967	2.52738	3.37409	2200.44	1858.98	1437.35	947.674	1230.83	893.17	0.887356	0.391354	2.02059	0.839556	1.18104	CHD3	-	chr17_7889712_+;chr17_7889760_+
chr17:57271053-57271107:mpeak_36243|chr17_57232859_57278923_PRR11_NM_+|	940.922	2.16034	0.620792	-3.47997	0.000501468	0.00932213	19.6342	3.85947	5.34827	5.24543	0.842459	4.82013	1534.28	1308.36	1180.63	2333.34	2399.32	2495.38	0.71688	0.150912	1.40278	-0.845239	2.24802	PRR11	-	chr17_59193706_+
chr17:40970232-40970370:mpeak_35378|chr17_40962946_40976310_BECN1_NM_-|	212.356	2.11547	0.802909	-2.63476	0.00841967	0.0646291	14.0245	6.43245	6.68533	2.62272	1.68492	0	474.026	564.769	574.939	264.894	283.909	354.28	1.68195	0.715488	2.65557	0.837474	1.8181	BECN1	-	chr17_42818276_-
chr12:95897846-95897945:mpeak_20031|chr12_95867821_95907427_METAP2_NM_+|	184.895	1.62671	0.677137	-2.40234	0.0162906	0.101097	8.41467	2.57298	10.6965	5.24543	1.68492	1.44604	291.709	373.082	378.39	358.438	438.078	348.977	2.07866	0.731247	1.37224	-0.13498	1.50722	METAP2	-	chr12_95504077_+
chr12:104721316-104721458:mpeak_20341|chr12_104609556_104742130_TXNRD1_NM_+mpeak_20341|chr12_104609556_104742130_TXNRD1_NM_+||	188.138	2.49033	1.26303	-1.97172	0.048642	0.213382	9.81712	0	14.7077	0.874238	0.842459	0	328.172	750.024	607.028	187.961	216.512	141.712	2.18293	0.47146	3.83654	1.62548	2.21106	TXNRD1	-	chr12_104327520_+
chr11:65825570-65825624:mpeak_14807|chr11_65819815_65836144_SF3B2_NM_+|	407.741	1.33539	0.616203	-2.16713	0.0302253	0.155553	21.0367	2.57298	10.6965	2.62272	2.52738	5.30214	776.955	939.138	915.891	651.308	776.747	788.091	1.30344	0.47164	1.71466	0.248098	1.46656	SF3B2	-	chr11_66058129_+
chr10:28824485-28824646:mpeak_9848|chr10_28821516_28908465_WAC_NM_+|	311.442	2.20273	0.629236	-3.50064	0.000464137	0.00876573	4.20734	7.71894	9.35947	9.61662	1.68492	1.92805	337.989	312.617	385.075	820.036	958.718	888.35	2.05524	0.496028	0.686119	-1.36469	2.05081	WAC	-	chr10_28535613_+;chr10_28535717_+
chr1:27269132-27269190:mpeak_1256|chr1_27248212_27272620_NUDC_NM_+|	233.706	1.29602	0.592865	-2.18603	0.0288137	0.149965	11.2196	7.71894	10.6965	1.74848	2.52738	3.8561	528.722	603.364	467.973	400.401	411.962	354.28	1.85212	0.697039	1.86563	0.455762	1.40987	NUDC	-	chr1_26942689_+
chr1:185272497-185272762:mpeak_7072|chr1_185267420_185286461_IVNS1ABP_NM_-|	188.798	1.9805	0.653174	-3.03212	0.00242845	0.0263194	2.80489	0	13.3707	6.11967	5.89721	3.37409	145.854	162.098	179.167	573.5	626.789	546.603	4.98099	0.881049	0.0717314	-1.84244	1.91418	IVNS1ABP	-	chr1_185303577_-
chrX:76929349-76929503:mpeak_85528|chrX_76764107_77041755_ATRX_NM_-|	100.407	-1.77056	0.643811	2.75012	0.00595728	0.050786	0	18.0109	2.67413	27.9756	28.6436	27.9568	138.842	186.541	181.841	167.854	184.498	240.042	6.11712	14.277	-2.03166	-0.223935	-1.80773	ATRX	chrX:76929451:-	chrX_77673844_-;chrX_77673906_-;chrX_77673955_-;chrX_77673990_-
chrX:23725945-23726039:mpeak_84582|chrX_23722099_23761407_ACOT9_NM_-|	39.7949	-1.62042	0.68868	2.35294	0.0186258	0.110859	2.80489	5.14596	5.34827	8.74238	14.3218	4.82013	103.781	79.7624	81.5611	54.2028	64.0269	53.0214	5.01656	16.2827	-1.06812	0.630448	-1.69857	ACOT9	chrX:23725948:-	chrX_23707838_-
chrX:14881103-14881235:mpeak_84409|chrX_14862103_14891184_FANCB_NM_-|	7.31533	-3.8212	1.54002	2.48128	0.0130913	0.0873914	0	0	0	1.74848	8.42459	1.92805	8.41467	15.4379	12.0336	14.8621	7.58213	17.3525	#DIV/0!	30.4074	-Inf	-0.149219	-Inf	FANCB	chrX:14881102:-;chrX:14881175:-	chrX_14862981_-;chrX_14863040_-
chr9:96071426-96071482:mpeak_82258|chr9_95947211_96082648_WNK2_NM_+|	10.1498	-1.84946	0.84348	2.19265	0.0283325	0.148337	12.622	10.2919	6.68533	27.1014	14.3218	15.9064	5.60978	5.14596	12.0336	4.37119	3.36983	4.33812	129.882	474.617	-0.953719	0.915841	-1.86956	WNK2	chr9:96071478:+	chr9_93309195_+
chr9:37884018-37884075:mpeak_81566|chr9_37880745_37904350_SLC25A51_NR_-|	16.3251	-3.84651	1.41792	2.71279	0.00667194	0.0550839	0	2.57298	0	0	4.21229	8.67623	32.2562	70.757	29.4155	19.2332	17.6916	11.0863	5.82875	40.2673	-2.32457	1.46377	-3.78835	SLC25A51	chr9:37884023:-	chr9_37884027_-
chr9:37882471-37882552:mpeak_81563|chr9_37880745_37904350_SLC25A51_NR_-|	17.3242	-4.71604	1.23988	3.80361	0.0001426	0.00372575	1.40245	1.28649	0	8.74238	5.89721	10.1223	32.2562	70.757	29.4155	19.2332	17.6916	11.0863	3.04572	51.5752	-3.20301	1.46377	-4.66679	SLC25A51	chr9:37882473:-	chr9_37882478_-
chr9:37881884-37881996:mpeak_81561|chr9_37880745_37904350_SLC25A51_NR_-|	38.7339	-2.03439	0.600363	3.38859	0.000702526	0.0116961	26.6465	41.1677	48.1344	45.4604	59.8146	63.1437	32.2562	70.757	29.4155	19.2332	17.6916	11.0863	87.5555	350.791	-0.538567	1.46377	-2.00234	SLC25A51	chr9:37881890:-	chr9_37881894_-;chr9_37881951_-
chr9:33348666-33348734:mpeak_81301|chr9_33290417_33369903_NFX1_NM_+|	35.4652	-1.54733	0.787965	1.9637	0.0495649	0.216058	25.244	48.8866	25.4043	61.1967	112.047	104.597	1.40245	11.5784	12.0336	5.24543	5.89721	12.0503	397.91	1197.95	-1.48098	0.109075	-1.59006	NFX1	chr9:33348725:+	chr9_33348690_+;chr9_33348741_+
chr9:33321025-33321084:mpeak_81300|chr9_33290417_33369903_NFX1_NM_+|	5.6101	-3.72509	1.57649	2.3629	0.0181323	0.109414	0	1.28649	0	3.49695	7.58213	6.74818	1.40245	11.5784	12.0336	5.24543	5.89721	12.0503	15.429	76.865	-3.79257	0.109075	-3.90165	NFX1	chr9:33321080:+	chr9_33321079_+
chr9:132657538-132657695:mpeak_83727|chr9_132652825_132805473_FNBP1_NM_-|	37.629	-1.58614	0.663092	2.39203	0.0167555	0.10321	8.41467	18.0109	4.0112	29.7241	42.9654	26.5107	29.4513	57.8921	68.1904	45.4604	53.9173	66.9998	19.5692	59.6236	-1.70453	-0.0972324	-1.6073	FNBP1	chr9:132657540:-;chr9:132657573:-;chr9:132657634:-	chr9_129895265_-;chr9_129895358_-
chr9:115392062-115392127:mpeak_82914|chr9_115249247_115421542_KIAA1958_NM_+|	34.7992	-2.69787	0.747398	3.60968	0.000306576	0.00667409	0	12.8649	1.33707	45.4604	26.1162	36.151	49.0856	43.7407	45.4603	66.4421	37.9106	53.0214	15.4049	68.4532	-2.92322	-0.186538	-2.73669	KIAA1958	chr9:115392117:+	chr9_112629783_+;chr9_112629835_+
chr8:99591598-99591657:mpeak_79468|chr8_99468228_99954799_STK3_NM_-|	59.5524	-2.88032	0.885786	3.25171	0.00114714	0.01637	0	1.28649	4.0112	6.99391	18.5341	9.64026	93.9638	144.087	120.336	88.2981	120.472	107.007	2.21731	11.1371	-2.73084	0.182613	-2.91345	STK3	chr8:99591606:-	chr8_98579379_-
chr8:74461755-74461899:mpeak_78830|chr8_74333700_74659943_STAU2_NM_-|	10.6531	-1.70695	0.849441	2.00949	0.044485	0.202207	5.60978	7.71894	8.0224	27.1014	10.1095	12.5323	8.41467	11.5784	13.3707	10.4909	4.21229	8.67623	63.995	212.765	-1.22019	0.513045	-1.73323	STAU2	chr8:74461752:-;chr8:74461836:-	chr8_73549519_-;chr8_73549586_-;chr8_73549618_-
chr8:23188124-23188174:mpeak_77767|chr8_23155635_23261722_LOXL2_NM_-|	19.3616	-4.66445	1.69142	2.75772	0.00582067	0.0500665	0	0	0	0	0	8.19422	40.6709	38.5947	70.8645	35.8438	22.7464	15.4244	#DIV/0!	33.2133	-Inf	1.02033	-Inf	LOXL2	chr8:23188118:-	chr8_23330606_-
chr7:55434423-55434508:mpeak_74508|chr7_55433140_55498918_LANCL2_NM_+|	37.0315	-3.92324	1.14545	3.42505	0.00061468	0.0107291	0	0	2.67413	7.86815	5.89721	4.82013	107.988	102.919	81.5611	43.7119	52.2324	34.7049	2.743	14.2255	-2.79703	1.16258	-3.95962	LANCL2	chr7:55434480:+	chr7_55366788_+
chr7:44529506-44529566:mpeak_74327|chr7_44425720_44530385_NUDCD3_NM_-|	143.403	-1.31258	0.578819	2.26768	0.0233488	0.128542	2.80489	18.0109	24.0672	34.0953	29.4861	29.8848	378.66	294.606	191.201	227.302	263.69	227.028	5.19198	13.0172	-1.05828	0.267788	-1.32606	NUDCD3	chr7:44529512:-	chr7_44489915_-
chr7:2239142-2239196:mpeak_73210|chr7_1855864_2272583_MAD1L1_NM_-|	12.6957	-3.77407	1.44723	2.60778	0.00911307	0.068383	0	0	0	2.62272	8.42459	7.71221	4.20734	20.5838	21.3931	26.2272	30.3285	30.8488	#DIV/0!	21.4629	-Inf	-0.920306	-Inf	MAD1L1	chr7:2239138:-	-
chr7:138745079-138745293:mpeak_76726|chr7_138732599_138794465_ZC3HAV1_NM_-|	217.025	-2.40989	0.354922	6.78991	1.12206e-11	3.57809e-09	40.6709	33.4488	46.7973	141.627	134.793	102.187	507.685	357.644	461.288	274.511	237.573	266.071	9.11468	48.6544	-1.64668	0.769622	-2.41631	ZC3HAV1	chr7:138745086:-	chr7_139060342_-;chr7_139060388_-
chr7:101901394-101901518:mpeak_75797|chr7_101459183_101926312_CUX1_NM_+|	98.2762	-2.38488	0.595053	4.00785	6.12744e-05	0.00205678	12.622	18.0109	5.34827	24.4787	32.8559	26.5107	350.611	231.568	151.089	118.022	120.472	87.7264	4.90696	25.7021	-1.22049	1.1685	-2.38898	CUX1	chr7:101901513:+	chr7_102258231_+
chr6:33260591-33260757:mpeak_69831|chr6_33260090_33267165_RGL2_NM_-|	72.6205	-1.27625	0.531601	2.40076	0.0163611	0.101307	11.2196	3.85947	10.6965	16.6105	24.4313	13.9784	120.61	162.098	139.055	118.896	138.163	111.827	6.11139	14.9152	-1.09396	0.193255	-1.28721	RGL2	chr6:33260618:-;chr6:33260683:-;chr6:33260710:-	chr6_33292826_-;chr6_33292936_-
chr6:2902924-2902982:mpeak_68537|chr6_2890804_2903546_SERPINB9_NM_-|	3.76215	-4.32765	1.81568	2.38348	0.0171496	0.104781	0	0	0	6.11967	6.73967	3.8561	0	3.85947	9.35947	7.86815	5.89721	1.44604	#DIV/0!	109.888	-Inf	-0.202546	-Inf	SERPINB9	chr6:2902927:-	-
chr6:107363121-107363192:mpeak_71481|chr6_107349375_107372260_C6orf203_NM_+|	52.5448	-1.39506	0.544847	2.56047	0.0104531	0.0751011	9.81712	10.2919	6.68533	22.7302	41.2805	35.1869	54.6954	90.0543	64.1792	106.657	86.7732	102.187	12.8246	33.5561	-1.88838	-0.500717	-1.38766	C6orf203	chr6:107363187:+	chr6_107041981_+
chr6:107361499-107361558:mpeak_71480|chr6_107349375_107372260_C6orf203_NM_+|	44.098	-3.46292	1.28253	2.70008	0.00693223	0.0566257	0	1.28649	0	9.61662	8.42459	5.30214	54.6954	90.0543	64.1792	106.657	86.7732	102.187	1.84727	7.89648	-4.1815	-0.500717	-3.68078	C6orf203	chr6:107361558:+	chr6_107040352_+
chr5:76737763-76737855:mpeak_65407|chr5_76729112_76788332_WDR41_NM_-|	69.1935	-1.8262	0.742611	2.45916	0.0139264	0.0908521	1.40245	0	6.68533	6.11967	6.73967	6.74818	168.293	150.519	156.437	89.1723	119.629	118.575	2.55269	5.98928	-1.27759	0.537734	-1.81533	WDR41	chr5:76737767:-;chr5:76737799:-	chr5_77441941_-;chr5_77441975_-
chr5:43016110-43016235:mpeak_64525|chr5_43015252_43067541_LOC648987_NR_-|	26.4643	-1.78286	0.688903	2.58797	0.00965421	0.0708973	8.41467	2.57298	6.68533	25.3529	24.4313	30.3668	36.4636	36.0217	21.3931	27.9756	59.8146	38.079	18.8254	63.678	-2.18118	-0.423061	-1.75811	LOC648987	chr5:43016150:-	chr5_43015991_-;chr5_43016037_-
chr5:34954556-34954617:mpeak_64306|chr5_34929697_34954657_DNAJC21_NM_+|	76.5835	-3.66838	1.16849	3.13942	0.00169285	0.0210742	1.40245	0	1.33707	5.24543	6.73967	19.7625	141.647	150.519	152.426	125.016	165.964	148.942	0.924279	7.21664	-3.53466	0.0152327	-3.54989	DNAJC21	chr5:34954607:+	chr5_34954501_+
chr5:34952239-34952425:mpeak_64305|chr5_34929697_34954657_DNAJC21_NM_+|	86.0211	-1.7935	0.548131	3.27203	0.00106777	0.0155314	7.01223	14.1514	12.0336	20.9817	56.4447	37.115	141.647	150.519	152.426	125.016	165.964	148.942	7.4669	26.0367	-1.78674	0.0152327	-1.80197	DNAJC21	chr5:34952290:+	chr5_34952184_+
chr5:141314145-141314219:mpeak_67324|chr5_141303384_141318085_KIAA0141_NM_+|	40.433	-2.37255	0.976564	2.42949	0.01512	0.0962089	1.40245	0	2.67413	11.3651	3.36983	5.78416	74.3296	68.184	92.2576	71.6875	80.876	73.266	2.60461	9.0861	-2.33154	0.0560212	-2.38756	KIAA0141	chr5:141314220:+	chr5_141934654_+
chr5:128869039-128869096:mpeak_66554|chr5_128796102_129072759_ADAMTS19_NM_+|	31.6144	-1.7975	0.61807	2.90825	0.00363463	0.0354526	9.81712	5.14596	4.0112	14.8621	19.3765	21.6906	63.11	64.3245	36.1008	44.5862	43.8078	52.5394	11.6026	39.6848	-1.55956	0.214589	-1.77415	ADAMTS19	chr5:128869091:+	-
chr5:100238393-100238444:mpeak_65972|chr5_100147833_100238989_ST8SIA4_NM_-|	14.0111	-3.55237	1.36272	2.60682	0.00913863	0.068383	0	0	0	2.62272	5.89721	4.82013	29.4513	16.7244	14.7077	26.2272	32.0134	35.669	#DIV/0!	14.2052	-Inf	-0.625221	-Inf	ST8SIA4	chr5:100238392:-	chr5_100902689_-
chr4:896644-896750:mpeak_59936|chr4_843562_926178_GAK_NM_-|	150.858	-1.66942	0.535295	3.11868	0.0018166	0.0219235	9.81712	15.4379	0	20.9817	25.2738	18.3165	269.269	337.06	354.323	227.302	281.381	251.129	3.94341	8.49842	-1.35434	0.338373	-1.69271	GAK	chr4:896648:-;chr4:896699:-	chr4_902863_-
chr4:8395262-8395314:mpeak_60321|chr4_8368807_8442452_ACOX3_NM_-|	39.48	-2.52724	0.771407	3.27614	0.00105237	0.0154156	0	1.28649	10.6965	13.9878	21.0615	27.4747	47.6831	87.4813	73.5387	51.5801	72.4514	66.5178	8.61249	32.8125	-2.38342	0.131288	-2.51471	ACOX3	chr4:8395260:-	chr4_8393535_-
chr4:76838270-76838322:mpeak_61499|chr4_76832506_76862166_NAAA_NM_-|	6.34891	-4.26899	1.56245	2.73225	0.00629043	0.0526576	0	0	1.33707	4.37119	2.52738	3.8561	14.0245	14.1514	18.7189	2.62272	2.52738	12.0503	8.55362	62.5257	-3.00782	1.44698	-4.4548	NAAA	chr4:76838271:-	chr4_75917119_-
chr4:57266118-57266241:mpeak_61224|chr4_57261714_57301802_PPAT_NM_-|	62.4687	-2.34532	0.958006	2.44813	0.0143599	0.0928837	2.80489	0	1.33707	5.24543	6.73967	6.26617	99.5736	126.076	157.774	107.531	119.629	116.647	1.62038	5.30857	-2.13961	0.157338	-2.29695	PPAT	chr4:57266117:-;chr4:57266182:-	chr4_56399952_-;chr4_56400018_-
chr4:24541459-24541582:mpeak_60535|chr4_24529664_24586184_DHX15_NM_-|	207.219	-2.43943	0.697827	3.49576	0.000472714	0.00888724	2.80489	19.2974	0	22.7302	32.0134	33.7409	366.038	596.932	411.817	304.235	360.572	336.445	2.41153	8.83739	-2.00123	0.457402	-2.45863	DHX15	chr4:24541429:-;chr4:24541474:-;chr4:24541528:-	chr4_24539852_-
chr4:156644520-156644625:mpeak_63183|chr4_156587861_156651181_GUCY1A3_NM_+|	39.4434	-3.19299	1.18003	2.70585	0.00681303	0.0558171	0	2.57298	0	6.11967	1.68492	6.26617	70.1223	123.503	92.2576	48.0831	64.8693	57.8416	2.70004	8.23844	-2.45119	0.743167	-3.19435	GUCY1A3	chr4:156644578:+;chr4:156644622:+	-
chr4:142950098-142950249:mpeak_62884|chr4_142950067_143767604_INPP4B_NM_-|	43.2629	-1.52663	0.655426	2.32922	0.0198474	0.115558	5.60978	2.57298	2.67413	16.6105	16.0067	19.7625	56.0978	43.7407	68.1904	99.6632	95.1978	93.0285	6.46133	18.1944	-2.2704	-0.776806	-1.49359	INPP4B	chr4:142950109:-	chr4_142028957_-
chr4:106393027-106393155:mpeak_62232|chr4_106290910_106395227_PPA2_NM_-|	309.249	-1.43498	0.436094	3.29052	0.00100001	0.0148852	39.2685	57.8921	60.168	71.6875	80.876	64.1077	527.319	822.067	865.082	267.517	448.188	406.819	7.10457	19.3022	-0.461728	0.980215	-1.44194	PPA2	chr4:106393072:-	-
chr4:100001131-100001265:mpeak_62013|chr4_99993592_100009939_ADH5_NM_-|	106.268	-3.08806	0.857275	3.60218	0.000315564	0.00679569	0	0	8.0224	7.86815	16.0067	21.6906	186.525	311.331	228.638	124.142	218.197	152.798	3.31279	9.2026	-2.50583	0.553125	-3.05896	ADH5	chr4:100001137:-;chr4:100001170:-;chr4:100001218:-	chr4_99080065_-
chr3:93781370-93781634:mpeak_56604|chr3_93780450_93782067_DHFRL1_NM_-|	54.4909	-1.82913	0.825605	2.2155	0.0267257	0.141949	4.20734	24.4433	0	26.2272	20.219	34.2229	96.7687	114.498	93.5947	62.0709	81.7185	95.9206	14.0969	33.6528	-1.49345	0.346862	-1.84031	DHFRL1	chr3:93781415:-;chr3:93781463:-	chr3_94062495_-;chr3_94062572_-;chr3_94062621_-
chr3:57909309-57909376:mpeak_56076|chr3_57742982_57913022_SLMAP_NM_+|	19.0948	-4.29803	1.37101	3.13494	0.00171889	0.0213344	0	0	0	7.86815	0.842459	4.33812	35.0611	28.3028	50.8085	31.4726	39.5956	30.8488	#DIV/0!	12.8033	-Inf	0.16382	-Inf	SLMAP	chr3:57909360:+	chr3_57923632_+
chr3:57904152-57904211:mpeak_56073|chr3_57742982_57913022_SLMAP_NM_+|	22.4503	-3.314	0.930892	3.56003	0.000370819	0.00748044	2.80489	2.57298	0	10.4909	24.4313	13.0143	35.0611	28.3028	50.8085	31.4726	39.5956	30.8488	7.06546	47.0349	-3.15602	0.16382	-3.31984	SLMAP	chr3:57904209:+	chr3_57918475_+
chr3:49745346-49745396:mpeak_55772|chr3_49726949_49758617_RNF123_NM_+|	19.4907	-3.70345	1.31822	2.80942	0.00496301	0.0444847	0	0	1.33707	6.11967	2.52738	9.15825	39.2685	38.5947	29.4155	34.9695	35.3833	37.115	3.73905	16.568	-3.73516	-0.00254141	-3.73262	RNF123	chr3:49745397:+	chr3_49707963_+
chr3:44686687-44686782:mpeak_55483|chr3_44666510_44687982_ZNF197_NM_+|	11.7171	-4.20887	1.38685	3.03484	0.00240665	0.0263069	0	0	0	1.74848	9.26704	7.71221	12.622	20.5838	17.3819	23.6044	26.9587	20.7266	#DIV/0!	26.2699	-Inf	-0.494906	-Inf	ZNF197	chr3:44686756:+	chr3_44645281_+
chr3:33125049-33125126:mpeak_55085|chr3_33038836_33138694_GLB1_NM_-|	326.818	-1.65688	0.461539	3.58989	0.000330818	0.00699697	32.2562	74.6164	53.4827	71.6875	126.369	126.287	603.051	734.586	756.78	358.438	484.414	499.847	7.65632	24.1561	-1.01625	0.641413	-1.65766	GLB1	chr3:33125059:-	chr3_33083568_-;chr3_33083601_-;chr3_33083637_-
chr3:196223084-196223173:mpeak_59660|chr3_196199643_196230639_RNF168_NM_-|	28.7914	-2.83796	1.32724	2.13824	0.0324974	0.16429	0	0	0	1.74848	4.21229	7.71221	26.6465	23.1568	37.4379	83.9269	75.8213	84.8343	#DIV/0!	5.59033	-Inf	-1.48724	-Inf	RNF168	chr3:196223085:-	chr3_196496215_-
chr3:183701528-183701593:mpeak_59201|chr3_183639189_183735727_ABCC5_NM_-|	206.561	-2.23308	0.668893	3.33847	0.000842409	0.0132783	9.81712	37.3082	40.112	69.0648	108.677	52.0574	321.16	658.683	409.142	169.602	293.176	309.934	6.28065	29.7393	-1.39736	0.846029	-2.24339	ABCC5	chr3:183701541:-	chr3_183983754_-
chr3:169781760-169781945:mpeak_58814|chr3_169755734_169801692_GPR160_NM_+|	31.7347	-3.31247	1.34701	2.45913	0.0139275	0.0908521	1.40245	0	0	5.24543	1.68492	4.82013	65.9149	91.3408	42.7861	49.8316	48.8626	68.9279	2.10323	7.0101	-3.0667	0.25509	-3.32179	GPR160	chr3:169781843:+	chr3_170064060_+
chr3:136236885-136236936:mpeak_57879|chr3_136057119_136471245_STAG1_NM_-|	18.1953	-3.2148	1.50839	2.13127	0.0330665	0.166316	0	1.28649	0	0	3.36983	9.64026	21.0367	51.4596	26.7413	31.4726	39.5956	33.7409	3.88912	18.6197	-3.33812	-0.078804	-3.25931	STAG1	chr3:136236885:-	chr3_136518017_-
chr3:134286186-134286260:mpeak_57842|chr3_134204574_134293634_CEP63_NM_+|	3.32927	-3.75987	1.79317	2.09678	0.0360131	0.176364	0	1.28649	5.34827	4.37119	0.842459	4.33812	1.40245	6.43245	13.3707	0.874238	1.68492	0	46.9317	248.826	-0.525724	3.0507	-3.57643	CEP63	chr3:134286244:+	chr3_134567352_+;chr3_134567400_+
chr22:46705001-46705142:mpeak_54131|chr22_46692637_46725943_GTSE1_NM_+|	45.2794	-3.0523	1.28001	2.38459	0.0170983	0.104544	1.40245	0	0	5.24543	6.73967	4.33812	74.3296	60.4651	90.9205	109.28	98.5677	92.0645	1.864	5.44267	-3.54091	-0.410035	-3.13087	GTSE1	chr22:46705057:+;chr22:46705103:+	chr22_46309160_+;chr22_46309245_+
chr22:38156062-38156361:mpeak_53665|chr22_38092994_38169789_TRIOBP_NM_+|	43.1014	-4.42035	1.29973	3.40098	0.00067144	0.0113148	1.40245	0	0	11.3651	5.05475	7.71221	64.5125	99.0598	113.651	62.9452	62.3419	89.1724	1.51767	11.2525	-4.10493	0.370341	-4.47528	TRIOBP	chr22:38156121:+;chr22:38156200:+;chr22:38156355:+	chr22_37760046_+;chr22_37760106_+;chr22_37760350_+
chr22:29120943-29121098:mpeak_53293|chr22_29083974_29137822_CHEK2_NM_-|	17.3723	-1.97188	0.729693	2.70234	0.00688534	0.0563537	5.60978	6.43245	5.34827	38.4665	40.438	50.1293	2.80489	9.00543	9.35947	14.8621	13.4793	12.5323	82.1477	315.689	-2.89138	-0.949167	-1.94221	CHEK2	chr22:29120948:-	chr22_28724966_-
chr22:19430669-19430732:mpeak_52936|chr22_19429217_19435755_C22orf39_NM_-|	61.4068	-1.70933	0.603954	2.83023	0.0046515	0.0426477	11.2196	7.71894	22.7301	26.2272	29.4861	12.0503	136.037	177.536	108.302	70.8133	64.8693	69.8919	9.877	32.963	-0.701547	1.03716	-1.7387	C22orf39	chr22:19430673:-	chr22_19443150_-
chr21:48077872-48077937:mpeak_52804|chr21_48055506_48084206_PRMT2_NM_+|	173.992	-3.15406	0.700396	4.50326	6.69185e-06	0.000348944	2.80489	7.71894	0	15.7363	7.58213	23.1366	476.831	447.699	425.187	194.081	245.155	241.971	1.16956	6.81952	-2.14217	0.986492	-3.12867	PRMT2	chr21:48077935:+	chr21_46658013_+
chr21:48056331-48056467:mpeak_52798|chr21_48055506_48084206_PRMT2_NM_+|	287.774	-1.08201	0.240255	4.5036	6.68108e-06	0.000348944	232.806	238.001	216.605	231.673	243.471	259.805	476.831	447.699	425.187	194.081	245.155	241.971	50.93	107.889	-0.0964696	0.986492	-1.08296	PRMT2	chr21:48056459:+	chr21_46636475_+;chr21_46636545_+
chr21:47671419-47671532:mpeak_52740|chr21_47655340_47705308_MCM3AP_NM_-|	66.4801	-2.01905	0.817029	2.4712	0.0134659	0.0888901	1.40245	0	6.68533	17.4848	7.58213	24.5827	77.1345	119.644	92.2576	131.136	161.752	158.1	4.19729	11.0091	-2.61797	-0.641842	-1.97612	MCM3AP	chr21:47671429:-	chr21_46251516_-
chr20:61533769-61533825:mpeak_51710|chr20_61513766_61569304_DIDO1_NM_-|	18.4203	-2.84273	1.43448	1.98171	0.0475113	0.210243	0	0	0	12.2393	5.05475	7.23019	21.0367	11.5784	2.67413	60.3224	58.9721	41.9351	#DIV/0!	15.2108	-Inf	-2.19182	-Inf	DIDO1	chr20:61533769:-	chr20_62902418_-
chr20:58494178-58494416:mpeak_51590|chr20_58439443_58507209_SYCP2_NM_-|	5.77858	-4.53424	1.61365	2.80994	0.00495513	0.0444847	1.40245	0	0	9.61662	26.9587	12.0503	2.80489	2.57298	2.67413	1.74848	4.21229	5.30214	52.252	431.732	-5.1157	-0.48416	-4.63154	SYCP2	chr20:58494152:-;chr20:58494177:-;chr20:58494346:-	chr20_59919292_-
chr20:57408854-57408915:mpeak_51545|chr20_57394310_57425958_GNAS-AS1_NR_-|	6.32443	-2.22343	1.08804	2.04352	0.0410013	0.191841	2.80489	7.71894	2.67413	4.37119	6.73967	10.1223	8.41467	18.0109	4.0112	5.24543	3.36983	2.41006	43.362	192.585	-0.686002	1.46499	-2.15099	GNAS-AS1	chr20:57408864:-	chr20_58833810_-
chr20:57395673-57395730:mpeak_51541|chr20_57394310_57425958_GNAS-AS1_NR_-|	15.7094	-2.75748	0.779708	3.53655	0.000405391	0.00806019	16.8293	16.7244	10.6965	35.8438	33.6983	33.2589	8.41467	18.0109	4.0112	5.24543	3.36983	2.41006	145.384	932.408	-1.2161	1.46499	-2.68109	GNAS-AS1	chr20:57395676:-	chr20_58820615_-
chr20:35412152-35412309:mpeak_50503|chr20_35406234_35492087_SOGA1_NM_-|	18.905	-2.44877	1.08633	2.25417	0.0241857	0.132184	0	3.85947	0	20.9817	38.7531	18.3165	8.41467	14.1514	9.35947	25.3529	43.8078	43.8632	36.2669	69.0573	-4.33795	-1.82385	-2.5141	SOGA1	chr20:35412152:-;chr20:35412178:-;chr20:35412258:-	chr20_36783856_-;chr20_36783897_-
chr2:99938193-99938253:mpeak_45816|chr2_99936262_99952860_TXNDC9_NM_-|	38.6114	-1.53987	0.732529	2.10214	0.0355413	0.175192	2.80489	16.7244	5.34827	22.7302	21.9039	20.2445	39.2685	64.3245	94.9317	35.8438	70.7665	68.4458	12.5312	37.0616	-1.3829	0.181501	-1.5644	TXNDC9	chr2:99938198:-	chr2_99321739_-
chr2:91830540-91830640:mpeak_45580|chr2_91825059_91847975_LOC654342_NR_-|	55.3089	-1.91367	0.831283	2.30207	0.0213313	0.120804	1.40245	5.14596	1.33707	3.49695	4.21229	3.8561	186.525	164.671	114.988	42.8377	71.609	63.6257	1.69149	6.49475	-0.55254	1.38843	-1.94097	LOC654342	chr2:91830582:-	-
chr2:75136674-75136741:mpeak_45249|chr2_75136257_75165434_LINC01291_NR_+|	9.06946	-3.52636	1.73405	2.0336	0.041992	0.194877	0	0	0	1.74848	4.21229	7.71221	26.6465	1.28649	8.0224	32.3468	10.952	15.9064	#DIV/0!	23.0942	-Inf	-0.719518	-Inf	LINC01291	chr2:75136729:+	chr2_74909603_+
chr2:65301487-65301623:mpeak_44759|chr2_65283494_65310772_CEP68_NM_+|	19.5139	-4.4949	1.41438	3.17801	0.00148292	0.019362	0	0	0	9.61662	5.89721	8.19422	9.81712	43.7407	33.4267	37.5922	29.4861	56.3955	#DIV/0!	19.2009	-Inf	-0.505376	-Inf	CEP68	chr2:65301624:+	chr2_65074488_+
chr2:242661109-242661223:mpeak_49540|chr2_242641455_242664403_ING5_NM_+|	17.7163	-3.10417	1.31561	2.35949	0.0182998	0.110025	0	1.28649	0	16.6105	10.1095	10.1223	19.6342	14.1514	10.6965	38.4665	50.5475	40.9711	8.67645	28.3435	-4.83985	-1.54705	-3.2928	ING5	chr2:242661161:+;chr2:242661215:+	chr2_241721745_+;chr2_241721800_+
chr2:230910374-230910440:mpeak_49098|chr2_230902247_230933715_SLC16A14_NM_-|	22.4156	-4.63926	1.32346	3.5054	0.00045593	0.00870036	0	0	0	13.1136	9.26704	4.82013	36.4636	38.5947	25.4043	41.9634	42.9654	56.3955	#DIV/0!	19.247	-Inf	-0.492352	-Inf	SLC16A14	chr2:230910384:-	chr2_230045658_-
chr2:220426427-220426502:mpeak_48909|chr2_220415564_220436268_OBSL1_NM_-|	24.3368	-1.95756	0.916734	2.13536	0.0327314	0.165171	71.5247	54.0326	28.0784	31.4726	42.1229	37.115	7.01223	3.85947	12.0336	2.62272	1.68492	0.482013	670.743	2311.46	0.472721	2.25769	-1.78497	OBSL1	chr2:220426444:-	chr2_219561709_-;chr2_219561757_-
chr2:136500664-136500986:mpeak_46790|chr2_136499188_136540318_UBXN4_NM_+|	78.7365	-1.68795	0.722488	2.3363	0.0194754	0.114114	0	5.14596	5.34827	13.9878	14.3218	5.30214	122.013	177.536	167.133	135.507	145.745	152.798	3.37304	7.74374	-1.67937	0.104577	-1.78395	UBXN4	chr2:136500788:+;chr2:136500922:+;chr2:136500975:+	chr2_135743216_+;chr2_135743397_+
chr2:111408674-111408728:mpeak_46149|chr2_111395736_111435684_BUB1_NM_-|	14.2444	-3.52319	1.50266	2.34464	0.0190457	0.11263	0	0	0	0.874238	9.26704	2.41006	11.2196	25.7298	28.0784	20.9817	39.5956	32.7769	#DIV/0!	13.4449	-Inf	-0.521658	-Inf	BUB1	chr2:111408678:-	chr2_110651101_-
chr19:54681965-54682117:mpeak_42528|chr19_54678125_54693733_MBOAT7_NM_-|	144.951	-6.87372	1.27786	5.37908	7.48681e-08	8.50318e-06	0	0	0	30.5983	18.5341	13.9784	373.05	349.925	255.38	222.931	292.333	182.683	#DIV/0!	9.04235	-Inf	0.487242	-Inf	MBOAT7	chr19:54681977:-;chr19:54682042:-	chr19_54178261_-;chr19_54178326_-
chr19:54672888-54673002:mpeak_42525|chr19_54664111_54676944_TMC4_NM_-|	23.9714	-5.23701	1.30619	4.00938	6.08784e-05	0.00205678	0	0	0	4.37119	6.73967	5.78416	54.6954	64.3245	49.4715	24.4787	42.1229	35.669	#DIV/0!	16.5199	-Inf	0.720284	-Inf	TMC4	chr19:54672930:-	chr19_54169194_-
chr19:50489550-50489610:mpeak_42128|chr19_50480041_50528805_VRK3_NM_-|	20.3989	-1.85579	0.681439	2.72334	0.0064626	0.0538507	9.81712	11.5784	5.34827	15.7363	32.0134	21.6906	25.244	38.5947	22.7301	13.9878	27.8011	20.2445	30.8931	111.94	-1.37657	0.480801	-1.85737	VRK3	chr19:50489556:-;chr19:50489604:-	chr19_49986302_-
chr19:50484890-50485028:mpeak_42127|chr19_50480041_50528805_VRK3_NM_-|	84.3447	-1.00184	0.435141	2.30233	0.0213164	0.120804	134.635	105.492	114.988	178.345	177.759	152.316	25.244	38.5947	22.7301	13.9878	27.8011	20.2445	410.211	819.589	-0.517734	0.480801	-0.998535	VRK3	chr19:50484888:-;chr19:50484962:-	chr19_49981686_-
chr19:4911777-4911939:mpeak_39522|chr19_4903091_4960667_UHRF1_NM_+|	129.781	-2.49281	0.645895	3.85946	0.000113636	0.00317224	0	6.43245	5.34827	17.4848	24.4313	11.5683	234.208	289.46	319.559	233.422	217.354	198.107	2.09565	8.24253	-2.18269	0.377963	-2.56065	UHRF1	chr19:4911921:+	chr19_4911908_+
chr19:45916456-45916579:mpeak_41724|chr19_45912983_45927177_ERCC1_NM_-|	28.5439	-2.21131	0.980266	2.25583	0.0240813	0.131701	4.20734	1.28649	0	2.62272	5.89721	2.89208	89.7565	47.6001	88.2464	25.3529	37.0682	37.597	3.65276	11.4099	-1.05467	1.17353	-2.22819	ERCC1	chr19:45916453:-	chr19_45413198_-
chr19:45382134-45382201:mpeak_41680|chr19_45349392_45391366_PVRL2_NM_+|	243.51	-0.967637	0.35306	2.74071	0.00613062	0.0517717	54.6954	36.0217	45.4603	45.4604	68.2391	59.7696	482.441	585.353	510.759	302.486	395.956	335.481	8.62672	16.7778	-0.349192	0.610475	-0.959667	PVRL2	chr19:45382193:+	chr19_44878932_+
chr19:41826845-41826962:mpeak_41485|chr19_41816093_41828499_CCDC97_NM_+|	20.6163	-3.02466	1.40891	2.14681	0.0318086	0.161548	0	0	0	2.62272	12.6369	6.26617	11.2196	12.8649	25.4043	49.8316	78.3486	48.2013	#DIV/0!	12.2041	-Inf	-1.83353	-Inf	CCDC97	chr19:41826902:+	chr19_41320994_+;chr19_41321057_+;chr19_41321082_+
chr19:36815804-36815969:mpeak_41116|chr19_36804224_36822620_LINC00665_NR_-|	55.3615	-1.95825	0.704519	2.77956	0.00544327	0.0477063	102.378	108.065	72.2016	97.0405	120.472	111.345	25.244	10.2919	5.34827	0.874238	6.73967	4.33812	691.331	2751.48	-0.218468	1.77429	-1.99276	LINC00665	chr19:36815809:-	chr19_36324910_-;chr19_36324946_-;chr19_36324959_-;chr19_36325017_-
chr19:33184032-33184107:mpeak_40905|chr19_33182866_33202657_NUDT19_NM_+|	40.3056	-3.19272	1.32977	2.40096	0.0163521	0.101307	1.40245	0	0	4.37119	5.05475	3.8561	43.4758	90.0543	101.617	73.436	87.6157	72.784	1.78923	5.68008	-3.24346	0.00806916	-3.25153	NUDT19	chr19:33184085:+	chr19_32693177_+
chr19:32920322-32920482:mpeak_40886|chr19_32896654_32972984_DPY19L3_NM_+|	31.339	-3.77674	1.32095	2.85911	0.00424835	0.0397104	0	0	0	0.874238	5.89721	3.8561	67.3174	64.3245	45.4603	56.8255	60.657	70.8559	#DIV/0!	5.6428	-Inf	-0.0887455	-Inf	DPY19L3	chr19:32920374:+;chr19:32920486:+	chr19_32429467_+;chr19_32429576_+
chr18:9367811-9367898:mpeak_38006|chr18_9334764_9399343_TWSG1_NM_+|	138.796	-3.6205	0.724556	4.99686	5.82726e-07	4.73664e-05	1.40245	5.14596	1.33707	7.86815	18.5341	23.1366	360.428	349.925	347.637	189.71	187.868	172.561	0.745325	9.0048	-2.65129	0.94346	-3.59475	TWSG1	chr18:9367891:+	chr18_9367891_+
chr18:9135710-9135776:mpeak_37995|chr18_9121454_9136718_NDUFV2-AS1_NR_-|	4.1674	-3.94031	1.50625	2.61597	0.00889747	0.0671237	1.40245	3.85947	2.67413	7.86815	1.68492	6.74818	4.20734	14.1514	4.0112	0.874238	2.52738	0	35.4764	319.481	-1.03849	2.71727	-3.75576	NDUFV2-AS1	chr18:9135711:-	chr18_9135713_-
chr18:77726624-77726696:mpeak_39112|chr18_77724581_77730439_HSBP1L1_NM_+|	20.4825	-1.96021	0.985863	1.98832	0.0467762	0.208153	0	5.14596	0	4.37119	0.842459	4.82013	46.2807	43.7407	62.8421	28.8499	21.9039	26.9927	10.0991	12.9058	-0.963353	0.975394	-1.93875	HSBP1L1	chr18:77726702:+	chr18_79966683_+;chr18_79966719_+
chr18:24122930-24122994:mpeak_38385|chr18_24035865_24237365_KCTD1_NM_-|	36.1603	-5.91161	1.30955	4.51424	6.35428e-06	0.000339893	0	0	0	6.99391	12.6369	13.4964	61.7076	57.8921	108.302	49.8316	72.4514	50.6114	#DIV/0!	19.1603	-Inf	0.398523	-Inf	KCTD1	chr18:24122935:-	chr18_26542972_-;chr18_26543005_-
chr17:79232155-79232215:mpeak_37621|chr17_79220473_79269139_SLC38A10_NM_-|	42.5488	-2.62883	1.29705	2.02677	0.0426857	0.196725	0	0	1.33707	6.11967	7.58213	4.33812	43.4758	70.757	52.1456	88.2981	107.835	128.697	2.41089	5.55364	-3.75405	-0.965218	-2.78883	SLC38A10	chr17:79232158:-	chr17_81258359_-
chr17:7588565-7588633:mpeak_33815|chr17_7573008_7590868_TP53_NM_-|	192.817	-6.27897	1.25816	4.9906	6.01929e-07	4.84524e-05	0	1.28649	0	11.3651	17.6916	27.9568	471.222	470.856	536.164	235.17	231.676	310.416	0.261085	7.33516	-5.46979	0.927407	-6.3972	TP53	chr17:7588533:-;chr17:7588567:-	chr17_7685235_-
chr17:73009254-73009399:mpeak_37180|chr17_73008758_73017015_ICT1_NM_+|	103.131	-1.98096	0.741423	2.67184	0.00754366	0.0598347	1.40245	5.14596	1.33707	8.74238	10.952	9.15825	215.977	226.422	187.189	154.74	246.84	169.669	1.25248	5.05079	-1.87143	0.140289	-2.01172	ICT1	chr17:73009317:+;chr17:73009388:+	chr17_75013221_+;chr17_75013293_+
chr17:62278274-62278431:mpeak_36814|chr17_62226451_62340683_TEX2_NM_-|	39.5736	-3.59601	1.32259	2.71891	0.00654981	0.0544133	0	0	0	11.3651	1.68492	5.78416	64.5125	42.4542	41.4491	96.1662	107.835	103.633	#DIV/0!	6.12227	-Inf	-1.05157	-Inf	TEX2	chr17:62278372:-	chr17_64201013_-
chr17:54910015-54910319:mpeak_35984|chr17_54869713_54911256_C17orf67_NM_-|	12.7949	-2.73623	1.0353	2.64295	0.00821869	0.0638794	9.81712	3.85947	0	20.9817	20.219	22.6546	11.2196	6.43245	26.7413	5.24543	17.6916	8.67623	46.2116	201.989	-2.2231	0.489812	-2.71291	C17orf67	chr17:54910110:-;chr17:54910146:-;chr17:54910266:-	chr17_56832750_-;chr17_56832862_-;chr17_56832908_-
chr17:45014278-45014477:mpeak_35628|chr17_45000485_45015964_GOSR2_NM_+|	95.7786	-1.70909	0.514112	3.32436	0.000886223	0.0138897	9.81712	6.43245	5.34827	21.856	28.6436	25.0647	176.708	191.687	137.718	177.47	208.087	160.51	4.26739	13.8379	-1.80682	-0.109621	-1.6972	GOSR2	chr17:45014307:+	-
chr17:38248747-38248900:mpeak_35145|chr17_38218445_38249272_THRA_NM_+|	37.8369	-1.54905	0.782461	1.97971	0.047736	0.210633	16.8293	84.9084	33.4267	51.5801	79.1911	65.0717	43.4758	23.1568	16.0448	10.4909	13.4793	16.3884	163.484	485.257	-0.534982	1.03462	-1.5696	THRA	chr17:38248825:+;chr17:38248901:+	chr17_40092570_+;chr17_40092647_+
chr16:81092994-81093051:mpeak_32688|chr16_81087699_81110872_C16orf46_NM_-|	31.3062	-4.78293	1.36361	3.50756	0.000452236	0.00865932	1.40245	0	0	6.11967	17.6916	5.30214	43.4758	66.8975	90.9205	39.3407	57.2872	47.2373	2.09015	20.2366	-4.37567	0.484586	-4.86025	C16orf46	chr16:81092997:-	chr16_81059395_-
chr16:81065033-81065098:mpeak_32674|chr16_81040102_81066174_CENPN_NM_+|	91.1978	-2.35849	0.750802	3.14129	0.00168205	0.0209712	185.123	245.72	181.841	111.028	155.012	152.316	32.2562	6.43245	17.3819	4.37119	0	2.89208	1092.7	3839.93	0.550408	2.94855	-2.39814	CENPN	chr16:81065088:+	chr16_81031483_+
chr16:81062170-81062396:mpeak_32670|chr16_81040102_81066174_CENPN_NM_+|	21.5026	-3.02891	0.850488	3.56138	0.000368916	0.0074602	26.6465	29.5893	37.4379	29.7241	30.3285	40.9711	32.2562	6.43245	17.3819	4.37119	0	2.89208	167.064	927.257	-0.108979	2.94855	-3.05753	CENPN	chr16:81062245:+;chr16:81062275:+;chr16:81062363:+;chr16:81062393:+	chr16_81028668_+;chr16_81028787_+
chr16:78154810-78154865:mpeak_32624|chr16_78133309_78312499_WWOX_NR_+mpeak_32624|chr16_78133309_79245504_WWOX_NM_+||	20.3814	-2.63197	1.0619	2.47856	0.0131916	0.0877779	0	3.85947	0	5.24543	0.842459	7.23019	50.488	52.7461	41.4491	29.7241	23.5888	29.4028	8.0026	16.101	-1.78691	0.806664	-2.59358	WWOX	chr16:78154864:+	chr16_78120964_+
chr16:71672410-71672565:mpeak_32358|chr16_71660055_71674292_MARVELD3_NM_+|	30.9108	-2.97438	1.34335	2.21415	0.0268182	0.142258	0	0	1.33707	6.11967	7.58213	4.33812	60.3051	28.3028	49.4715	92.6693	48.0201	72.784	2.905	8.45066	-3.75405	-0.628558	-3.12549	MARVELD3	chr16:71672462:+;chr16:71672562:+	chr16_71638654_+
chr16:70548137-70548197:mpeak_32310|chr16_70515047_70557457_COG4_NM_-|	102.839	-1.31127	0.623414	2.10337	0.0354338	0.174805	5.60978	7.71894	4.0112	5.24543	11.7944	7.23019	248.233	288.174	228.638	156.489	166.807	104.115	2.26652	5.6784	-0.485079	0.839923	-1.325	COG4	chr16:70548141:-	chr16_70514240_-
chr16:67987629-67987799:mpeak_32028|chr16_67978834_68002597_SLC12A4_NM_-|	9.5757	-3.64363	1.4888	2.44736	0.0143907	0.0929954	1.40245	0	0	7.86815	4.21229	1.44604	11.2196	28.3028	18.7189	12.2393	19.3765	10.1223	7.22397	32.4079	-3.26977	0.480675	-3.75045	SLC12A4	chr16:67987645:-;chr16:67987686:-;chr16:67987746:-	chr16_67953845_-
chr16:58047398-58047480:mpeak_31821|chr16_58035276_58054044_USB1_NM_+|	86.5599	-1.90326	0.502996	3.78385	0.00015442	0.00393938	11.2196	10.2919	8.0224	11.3651	25.2738	18.3165	207.562	192.974	236.661	92.6693	105.307	119.057	4.63497	17.3342	-0.895889	1.0071	-1.90299	USB1	chr16:58047462:+	chr16_58013557_+
chr16:3181662-3181726:mpeak_30033|chr16_3175967_3184883_ZNF213-AS1_NR_-|	6.15788	-4.17713	1.2852	3.25018	0.00115333	0.0164018	4.20734	1.28649	0	19.2332	6.73967	7.71221	11.2196	7.71894	6.68533	1.74848	5.89721	1.44604	32.1604	370.503	-2.61623	1.49486	-4.11109	ZNF213-AS1	chr16:3181669:-	chr16_3131656_-
chr16:3178829-3178887:mpeak_30031|chr16_3175967_3184883_ZNF213-AS1_NR_-|	5.91589	-2.36038	1.01773	2.31926	0.0203812	0.117756	4.20734	3.85947	5.34827	6.11967	7.58213	9.15825	11.2196	7.71894	6.68533	1.74848	5.89721	1.44604	52.3539	251.438	-0.768973	1.49486	-2.26383	ZNF213-AS1	chr16:3178834:-	chr16_3128836_-
chr16:24960440-24960507:mpeak_31022|chr16_24931581_25026699_ARHGAP17_NM_-|	24.5959	-3.31652	1.35644	2.44502	0.0144846	0.0934557	0	0	0	0.874238	6.73967	2.89208	44.8782	34.7352	38.7749	72.5618	45.4928	48.2013	#DIV/0!	6.31917	-Inf	-0.489877	-Inf	ARHGAP17	chr16:24960449:-	-
chr16:2389434-2389545:mpeak_29916|chr16_2326806_2390747_ABCA3_NM_-|	54.6103	-2.2062	0.734011	3.00568	0.00264988	0.0280948	1.40245	3.85947	6.68533	16.6105	8.42459	10.6043	159.879	106.779	104.291	89.1723	96.0403	51.5754	3.22073	15.0512	-1.57679	0.647624	-2.22442	ABCA3	chr16:2389446:-	chr16_2339447_-
chr16:1757847-1757973:mpeak_29834|chr16_1756220_1818703_MAPK8IP3_NM_+|	19.9118	-2.7535	1.25512	2.19382	0.0282486	0.14814	2.80489	0	0	3.49695	2.52738	7.23019	60.3051	34.7352	30.7525	20.9817	40.438	35.669	6.6893	13.652	-2.24047	0.373676	-2.61414	MAPK8IP3	chr16:1757898:+;chr16:1757974:+	chr16_1707896_+;chr16_1707972_+
chr16:1586601-1586668:mpeak_29807|chr16_1561151_1662109_IFT140_NM_-|	12.0625	-4.04655	1.43896	2.81212	0.00492155	0.0443528	0	0	0	5.24543	2.52738	6.74818	14.0245	14.1514	30.7525	20.1075	16.0067	35.1869	#DIV/0!	20.3657	-Inf	-0.274963	-Inf	IFT140	chr16:1586604:-	-
chr15:52673738-52673795:mpeak_27995|chr15_52606045_52821247_MYO5A_NM_-|	66.2817	-1.3964	0.677158	2.06215	0.0391931	0.186218	5.60978	1.28649	5.34827	8.74238	9.26704	3.37409	143.049	163.384	161.785	96.1662	108.677	88.6904	2.61513	7.28486	-0.804361	0.673656	-1.47802	MYO5A	chr15:52673742:-	chr15_52381548_-
chr15:48454426-48454492:mpeak_27667|chr15_48446090_48470558_MYEF2_NR_-mpeak_27667|chr15_48435268_48470558_MYEF2_NM_-||	46.0663	-5.06079	1.2779	3.96024	7.48742e-05	0.00234257	0	0	0	10.4909	6.73967	4.33812	98.1712	101.633	90.9205	90.9208	65.7118	83.8703	#DIV/0!	8.96815	-Inf	0.273599	-Inf	MYEF2	chr15:48454437:-	chr15_48162241_-
chr15:41100789-41100933:mpeak_27281|chr15_41099273_41106345_ZFYVE19_NM_+|	23.6298	-4.09009	1.49369	2.73825	0.00617671	0.0518921	0	0	0	0	13.4793	8.19422	43.4758	29.5893	22.7301	41.0892	65.7118	59.2876	#DIV/0!	19.5741	-Inf	-0.793927	-Inf	ZFYVE19	chr15:41100867:+;chr15:41100929:+	chr15_40808667_+;chr15_40808736_+
chr14:96920627-96920684:mpeak_26426|chr14_96858447_96954641_AK7_NM_+|	26.5577	-2.21256	1.00614	2.19906	0.0278734	0.146566	0	0	4.0112	4.37119	4.21229	3.8561	61.7076	65.611	54.8197	31.4726	47.1777	41.4531	6.60685	10.3574	-1.63283	0.600758	-2.23359	AK7	chr14:96920679:+	chr14_96454341_+
chr14:74331384-74331521:mpeak_25684|chr14_74318533_74350803_PTGR2_NM_+|	25.2079	-4.09636	1.30833	3.13098	0.00174224	0.0214353	0	0	1.33707	4.37119	6.73967	2.89208	57.5003	54.0326	74.8757	32.3468	37.0682	31.3308	2.15183	13.8993	-3.38859	0.887748	-4.27633	PTGR2	chr14:74331440:+;chr14:74331520:+	chr14_73864731_+;chr14_73864817_+
chr14:51409761-51409963:mpeak_24653|chr14_51372274_51411248_PYGL_NM_-|	46.1918	-2.99866	1.23918	2.41988	0.0155258	0.098113	2.80489	0	0	2.62272	0.842459	10.1223	122.013	111.925	81.5611	73.436	69.9241	79.0501	2.6671	6.10918	-2.27626	0.50441	-2.78067	PYGL	chr14:51409834:-;chr14:51409860:-	chr14_50943028_-;chr14_50943118_-;chr14_50943166_-
chr14:51390442-51390624:mpeak_24652|chr14_51372274_51411248_PYGL_NM_-|	49.0163	-1.35212	0.62947	2.14804	0.0317109	0.161297	5.60978	3.85947	8.0224	11.3651	15.1643	6.26617	122.013	111.925	81.5611	73.436	69.9241	79.0501	5.54413	14.7455	-0.906832	0.50441	-1.41124	PYGL	chr14:51390463:-;chr14:51390530:-;chr14:51390613:-	chr14_50923746_-;chr14_50923813_-
chr14:34418515-34418595:mpeak_24182|chr14_34395128_34420284_EGLN3_NM_-|	47.3505	-3.05536	1.2252	2.49377	0.0126394	0.0852674	0	0	2.67413	1.74848	8.42459	1.44604	138.842	133.795	100.28	54.2028	76.6637	50.1293	2.15126	6.41954	-2.11936	1.0429	-3.16225	EGLN3	chr14:34418516:-;chr14:34418542:-	chr14_33949290_-;chr14_33949339_-
chr14:24707068-24707197:mpeak_24003|chr14_24701627_24707794_GMPR2_NR_+mpeak_24003|chr14_24701627_24707451_GMPR2_NM_+||	3.77348	-4.03171	1.69972	2.37199	0.0176927	0.107623	1.40245	0	0	4.37119	8.42459	5.30214	8.41467	6.43245	0	2.62272	2.52738	5.78416	18.8918	165.516	-3.68981	0.44133	-4.13114	GMPR2	chr14:24707131:+	chr14_24237924_+
chr14:24661819-24662154:mpeak_23977|chr14_24659014_24664942_TM9SF1_NM_-|	117.047	-3.19569	0.492361	6.49055	8.55263e-11	2.08558e-08	30.8538	28.3028	9.35947	93.5435	129.739	125.323	166.891	258.585	208.582	99.6632	142.376	111.345	10.806	98.6479	-2.34708	0.843379	-3.19046	TM9SF1	chr14:24661819:-;chr14:24661915:-;chr14:24661947:-;chr14:24661998:-;chr14:24662033:-;chr14:24662099:-	chr14_24192610_-;chr14_24192710_-;chr14_24192871_-
chr14:24453195-24453525:mpeak_23941|chr14_24439082_24475094_DHRS4L2_NM_+|	151.13	-1.08008	0.484156	2.23084	0.0256914	0.13768	14.0245	42.4542	29.4155	33.2211	32.8559	39.5251	460.002	292.033	274.099	187.087	206.402	202.445	8.37065	17.7204	-0.298006	0.783993	-1.082	DHRS4L2	chr14:24453294:+;chr14:24453326:+;chr14:24453463:+;chr14:24453527:+	chr14_23984081_+;chr14_23984116_+;chr14_23984349_+
chr14:100350064-100350119:mpeak_26513|chr14_100259744_100406323_EML1_NM_+|	18.7052	-2.49588	1.27189	1.96234	0.0497231	0.216407	0	2.57298	0	2.62272	5.05475	4.82013	23.8416	59.1786	30.7525	20.1075	34.5408	40.9711	6.78453	13.0701	-2.28014	0.250779	-2.53092	EML1	chr14:100350115:+	chr14_99883777_+
chr13:42452807-42452959:mpeak_22498|chr13_42142441_42535221_VWA8_NM_-|	7.76365	-3.57743	1.63412	2.18921	0.0285819	0.149321	0	0	0	2.62272	1.68492	5.30214	22.4391	14.1514	2.67413	19.2332	6.73967	18.3165	#DIV/0!	21.6977	-Inf	-0.173731	-Inf	VWA8	chr13:42452908:-	chr13_41878773_-
chr13:34411578-34411647:mpeak_22297|chr13_34392205_34540223_RFC3_NM_+|	124.877	-1.44342	0.569206	2.53585	0.0112176	0.07897	180.915	204.552	232.65	288.499	295.703	256.431	11.2196	5.14596	10.6965	5.24543	1.68492	5.78416	2284.07	6611.6	-0.443595	1.0898	-1.53339	RFC3	chr13:34411582:+;chr13:34411633:+	chr13_33837466_+;chr13_33837499_+
chr12:32490879-32491142:mpeak_17767|chr12_32260184_32530473_BICD1_NM_+|	7.71418	-4.00493	1.69455	2.36342	0.0181072	0.109383	0	0	0	2.62272	6.73967	4.33812	14.0245	10.2919	12.0336	17.4848	23.5888	1.44604	#DIV/0!	32.2216	-Inf	-0.226175	-Inf	BICD1	chr12:32491096:+	chr12_32338075_+
chr12:32485942-32486002:mpeak_17766|chr12_32260184_32530473_BICD1_NM_+|	7.45591	-3.62203	1.69103	2.14191	0.0322006	0.163088	0	0	0	3.49695	4.21229	2.89208	14.0245	10.2919	12.0336	17.4848	23.5888	1.44604	#DIV/0!	24.9328	-Inf	-0.226175	-Inf	BICD1	chr12:32485999:+	chr12_32333064_+
chr12:121789207-121789333:mpeak_21163|chr12_121746494_121792012_ANAPC5_NM_-|	338.948	-3.91829	0.606557	6.45988	1.04783e-10	2.48216e-08	0	9.00543	6.68533	31.4726	67.3967	39.5251	765.735	883.819	843.689	396.904	518.954	504.186	0.943997	9.74578	-3.1408	0.812088	-3.95288	ANAPC5	chr12:121789267:-	-
chr12:113382641-113382795:mpeak_20791|chr12_113376237_113407766_OAS3_NM_+|	78.7426	-1.62853	0.509487	3.19641	0.00139151	0.0186081	21.0367	16.7244	40.112	62.9452	101.937	104.597	116.403	90.0543	74.8757	94.4177	126.369	95.4386	27.68	85.2176	-1.79098	-0.168673	-1.62231	OAS3	chr12:113382698:+;chr12:113382793:+	chr12_112944893_+;chr12_112944983_+
chr12:113380028-113380104:mpeak_20790|chr12_113376237_113407766_OAS3_NM_+|	51.2142	-4.28525	1.30366	3.28709	0.00101228	0.0149604	0	0	0	4.37119	9.26704	3.37409	116.403	90.0543	74.8757	94.4177	126.369	95.4386	#DIV/0!	5.37982	-Inf	-0.168673	-Inf	OAS3	chr12:113380108:+	chr12_112942263_+
chr11:73059776-73059833:mpeak_15314|chr11_73019662_73078628_ARHGEF17_NM_+|	29.8495	-3.54607	1.35216	2.62252	0.00872826	0.0663733	0	0	0	2.62272	10.1095	4.33812	25.244	37.3082	53.4827	64.6936	90.9855	69.4099	#DIV/0!	7.58381	-Inf	-0.955937	-Inf	ARHGEF17	chr11:73059832:+	-
chr11:64000462-64000520:mpeak_14601|chr11_63997752_64001365_DNAJC4_NM_+|	16.7765	-2.05088	0.910724	2.25192	0.0243272	0.132521	2.80489	0	6.68533	3.49695	7.58213	8.19422	54.6954	37.3082	22.7301	13.9878	23.5888	20.2445	12.4073	33.3326	-1.02209	0.988619	-2.01071	DNAJC4	chr11:64000518:+	chr11_64233042_+
chr11:62283367-62283435:mpeak_14395|chr11_62201363_62314332_AHNAK_NM_-|	142.608	-2.33952	0.412814	5.66726	1.45102e-08	2.11499e-06	91.1589	133.795	175.156	224.679	291.491	270.409	112.196	106.779	159.111	42.8377	53.0749	50.6114	105.825	536.826	-0.975196	1.36758	-2.34277	AHNAK	chr11:62283374:-	chr11_62515903_-;chr11_62515967_-
chr10:94675731-94675797:mpeak_11503|chr10_94594469_94817979_EXOC6_NM_+|	21.654	-3.85412	1.37019	2.81284	0.00491059	0.0443051	0	1.28649	0	5.24543	3.36983	13.0143	25.244	52.7461	34.7637	37.5922	44.6503	41.9351	3.42292	17.4183	-4.0715	-0.139229	-3.93227	EXOC6	chr10:94675785:+	chr10_92916030_+
chr10:81916722-81916900:mpeak_11152|chr10_81915668_81965433_ANXA11_NM_-|	149.867	-2.97108	0.631285	4.70641	2.52117e-06	0.000155993	7.01223	5.14596	2.67413	15.7363	16.0067	25.5467	504.88	344.779	296.829	159.986	213.984	205.82	1.29372	9.88112	-1.94953	0.98362	-2.93315	ANXA11	chr10:81916719:-;chr10:81916751:-;chr10:81916781:-;chr10:81916844:-;chr10:81916890:-	chr10_80156986_-;chr10_80157026_-;chr10_80157090_-;chr10_80157135_-
chr10:135000266-135000320:mpeak_12888|chr10_134973970_135038162_KNDC1_NM_+|	3.50568	-3.35012	1.64979	2.03063	0.0422926	0.195565	0	0	0	0.874238	6.73967	3.8561	2.80489	3.85947	5.34827	7.86815	5.89721	4.82013	#DIV/0!	61.7149	-Inf	-0.629624	-Inf	KNDC1	chr10:135000321:+	chr10_133186816_+
chr10:131936971-131937101:mpeak_12824|chr10_131934638_131978376_GLRX3_NM_+|	75.3296	-3.71733	1.17828	3.15486	0.00160573	0.0204817	1.40245	0	1.33707	0.874238	7.58213	4.33812	161.281	243.147	246.02	64.6936	98.5677	74.712	0.631759	5.37644	-2.22353	1.45063	-3.67417	GLRX3	chr10:131937022:+	chr10_130138763_+
chr10:127480077-127480148:mpeak_12730|chr10_127477574_127511837_UROS_NM_-|	65.4455	-1.13167	0.427474	2.64734	0.00811267	0.0632163	28.0489	39.8812	50.8085	32.3468	26.1162	30.8488	178.111	133.795	117.662	46.3346	55.6023	45.7912	27.6414	60.4569	0.410866	1.53994	-1.12907	UROS	chr10:127480089:-	chr10_125791502_-;chr10_125791536_-
chr10:102143247-102143407:mpeak_11867|chr10_102133332_102147793_OLMALINC_NR_+|	9.58234	-1.91857	0.913666	2.09986	0.0357408	0.175966	1.40245	10.2919	0	9.61662	9.26704	8.67623	18.2318	18.0109	10.6965	10.4909	10.1095	8.19422	37.3708	95.7121	-1.23676	0.704995	-1.94175	OLMALINC	chr10:102143313:+	-
chr10:102142941-102143181:mpeak_11866|chr10_102133332_102147793_OLMALINC_NR_+|	10.1678	-4.11688	1.11166	3.70337	0.00021275	0.00508332	0	3.85947	0	20.9817	8.42459	13.0143	18.2318	18.0109	10.6965	10.4909	10.1095	8.19422	24.6668	147.322	-3.45829	0.704995	-4.16329	OLMALINC	chr10:102142999:+;chr10:102143068:+;chr10:102143129:+;chr10:102143183:+	chr10_100383241_+;chr10_100383310_+;chr10_100383368_+;chr10_100383430_+
chr1:7836778-7836837:mpeak_329|chr1_7831328_7839685_VAMP3_NM_+|	52.924	-2.832	0.770074	3.67757	0.000235469	0.00542299	1.40245	1.28649	4.0112	12.2393	10.952	10.1223	123.415	93.9138	135.044	75.1845	81.7185	85.7983	1.90143	13.7262	-2.31385	0.53792	-2.85177	VAMP3	chr1:7836835:+	chr1_7776773_+
chr1:6516677-6516734:mpeak_268|chr1_6484847_6520058_ESPN_NM_+|	19.8483	-4.01699	1.21267	3.31251	0.000924642	0.0141426	1.40245	0	1.33707	6.11967	6.73967	11.0863	60.3051	39.8812	34.7637	15.7363	36.2257	24.5827	3.04503	31.2832	-3.12777	0.818052	-3.94582	ESPN	chr1:6516731:+	chr1_6456668_+
chr1:62330476-62330541:mpeak_2725|chr1_62208148_62626579_INADL_NM_+|	15.8265	-2.4251	0.984941	2.46218	0.0138096	0.0904212	4.20734	0	8.0224	17.4848	27.8011	23.6186	32.2562	11.5784	9.35947	8.74238	22.7464	24.1006	34.4861	123.953	-2.49421	-0.0635434	-2.43066	INADL	chr1:62330527:+	chr1_61864855_+
chr1:46749840-46749894:mpeak_2338|chr1_46744756_46769038_LRRC41_NM_-|	56.8003	-4.87207	1.37417	3.54546	0.000391935	0.0078302	0	0	0	2.62272	5.05475	9.15825	56.0978	162.098	147.077	87.4238	106.992	105.079	#DIV/0!	5.62137	-Inf	0.286443	-Inf	LRRC41	chr1:46749842:-	chr1_46284171_-
chr1:46072983-46073404:mpeak_2276|chr1_46049659_46083732_NASP_NM_+|	148.04	-1.71431	0.43353	3.95429	7.67621e-05	0.00238365	32.2562	45.0272	30.7525	147.746	119.629	160.51	127.623	238.001	196.549	182.716	249.368	246.309	19.2176	63.0735	-1.98571	-0.271108	-1.71461	NASP	chr1:46073053:+;chr1:46073426:+	chr1_45607342_+;chr1_45607361_+;chr1_45607408_+;chr1_45607439_+;chr1_45607500_+;chr1_45607549_+;chr1_45607662_+
chr1:36224996-36225233:mpeak_1728|chr1_36202207_36235551_CLSPN_NM_-|	23.7918	-4.39947	1.34352	3.27459	0.00105817	0.0154543	0	0	0	7.86815	5.89721	7.23019	50.488	23.1568	38.7749	67.3164	50.5475	34.2229	#DIV/0!	13.805	-Inf	-0.435999	-Inf	CLSPN	chr1:36224947:-;chr1:36224998:-;chr1:36225175:-;chr1:36225227:-	chr1_35759395_-;chr1_35759576_-;chr1_35759628_-
chr1:154961433-154961492:mpeak_5760|chr1_154955769_154965188_FLAD1_NM_+|	73.9404	-3.36684	0.810837	4.15231	3.29143e-05	0.00128118	2.80489	6.43245	38.7749	104.909	159.225	125.323	86.9516	92.6273	72.2016	59.4482	88.4582	50.1293	19.0691	196.66	-3.01999	0.346406	-3.36639	FLAD1	chr1:154961488:+;chr1:154961541:+	chr1_154989011_+
chr1:144930402-144930461:mpeak_4724|chr1_144852499_145076186_PDE4DIP_NM_-|	4.22629	-3.95508	1.63342	2.42135	0.015463	0.097791	0	0	0	5.24543	11.7944	7.71221	5.60978	0	2.67413	6.11967	6.73967	4.82013	#DIV/0!	140.005	-Inf	-1.09369	-Inf	PDE4DIP	chr1:144930410:-	chr1_148954082_+
chr1:1254044-1254251:mpeak_80|chr1_1247304_1260067_CPSF3L_NM_-|	42.1883	-1.50609	0.486467	3.09597	0.0019617	0.0230702	12.622	33.4488	25.4043	59.4482	66.5542	56.3955	44.8782	52.7461	36.1008	31.4726	43.8078	43.3812	53.4492	153.713	-1.35158	0.172418	-1.524	CPSF3L	chr1:1254049:-;chr1:1254075:-;chr1:1254117:-;chr1:1254168:-;chr1:1254196:-	chr1_1318681_-;chr1_1318738_-;chr1_1318790_-;chr1_1318814_-;chr1_1318863_-
chr1:109967875-109967939:mpeak_3874|chr1_109944712_109969108_PSMA5_NM_-|	209.626	-2.03811	0.645275	3.15851	0.00158576	0.0203207	1.40245	9.00543	12.0336	14.8621	18.5341	26.5107	297.318	587.926	585.635	265.768	377.421	319.093	1.52572	6.2255	-1.41655	0.612147	-2.0287	PSMA5	chr1:109967881:-	chr1_109425261_-
chrX:1544123-1544177:mpeak_84230|chrX_1522382_1572655_ASMTL_NM_-|	30.1695	-2.12879	1.05792	2.01224	0.0441951	0.201331	0	5.14596	0	0.874238	1.68492	6.26617	89.7565	52.7461	101.617	30.5983	32.8559	40.4891	6.3239	8.49052	-0.778208	1.23179	-2.01	ASMTL	-	chrX_1425230_-
chr9:27016902-27017059:mpeak_81219|chr9_26947036_27062615_IFT74_NM_+|	5.52946	-4.29841	1.93401	2.22254	0.0262471	0.140035	0	0	0	0.874238	0	9.64026	4.20734	16.7244	10.6965	3.49695	10.1095	10.6043	#DIV/0!	65.1436	-Inf	0.385566	-Inf	IFT74	-	chr9_27016989_+;chr9_27017024_+
chr9:115938807-115938963:mpeak_82951|chr9_115928435_115983641_FKBP15_NM_-|	11.1564	-3.29082	1.40014	2.35036	0.0187555	0.111311	0	0	0	6.11967	5.89721	3.8561	8.41467	12.8649	16.0448	27.1014	36.2257	17.3525	#DIV/0!	19.6741	-Inf	-1.11209	-Inf	FKBP15	-	chr9_113176542_-
chr8:92081407-92082059:mpeak_79170|chr8_92075974_92082417_OTUD6B-AS1_NR_-|	137.881	-1.53722	0.398749	3.85511	0.000115677	0.00320761	133.232	183.968	161.785	201.075	234.203	251.611	96.7687	141.514	89.5835	38.4665	57.2872	65.0717	146.092	427.102	-0.520095	1.02761	-1.54771	OTUD6B-AS1	-	chr8_91069375_-;chr8_91069625_-;chr8_91069717_-;chr8_91069753_-
chr7:43843334-43843457:mpeak_74275|chr7_43798271_43846575_BLVRA_NM_+|	87.4027	-1.27044	0.556963	2.281	0.0225482	0.125805	7.01223	2.57298	13.3707	18.359	15.1643	13.4964	179.513	208.411	143.066	128.513	175.231	144.122	4.32322	10.4986	-1.0344	0.245618	-1.28002	BLVRA	-	chr7_43803793_+;chr7_43803812_+
chr6:30035471-30035739:mpeak_69460|chr6_30034931_30036880_PPP1R11_NM_+|	110.994	-3.5445	1.01828	3.48086	0.000499813	0.00931224	0	2.57298	1.33707	3.49695	13.4793	13.4964	215.977	342.206	219.279	131.136	220.724	168.223	0.754387	5.8592	-2.96226	0.580032	-3.54229	PPP1R11	-	chr6_30067749_+;chr6_30067888_+
chr6:144768410-144768461:mpeak_72358|chr6_144612872_145172124_UTRN_NM_+|	10.1857	-3.03577	1.51164	2.00826	0.0446157	0.202579	1.40245	0	0	3.49695	0	7.71221	26.6465	14.1514	13.3707	18.359	20.219	16.8705	7.76712	30.3232	-2.99866	-0.0336928	-2.96497	UTRN	-	chr6_144447282_+
chr6:144178493-144178590:mpeak_72347|chr6_144164507_144184553_LTV1_NM_+|	36.5603	-2.22049	1.0211	2.1746	0.0296603	0.153313	0	3.85947	0	33.2211	31.171	23.1366	9.81712	16.7244	34.7637	88.2981	106.15	91.5825	18.8865	30.6012	-4.50328	-2.22209	-2.28119	LTV1	-	chr6_143857424_+
chr5:36136401-36136558:mpeak_64340|chr5_36104208_36152015_LMBRD2_NM_-|	28.078	-1.15569	0.519164	2.22605	0.0260106	0.139131	29.4513	20.5838	24.0672	40.215	26.1162	30.3668	25.244	39.8812	40.112	15.7363	21.0615	24.1006	70.4146	158.786	-0.383966	0.789169	-1.17313	LMBRD2	-	chr5_36136407_-
chr5:112220975-112221069:mpeak_66180|chr5_112196884_112227299_SRP19_NM_+|	39.5738	-2.88162	0.604321	4.76835	1.85742e-06	0.000120657	8.41467	0	10.6965	49.8316	34.5408	48.6833	57.5003	63.038	44.1232	45.4604	58.1296	54.4675	17.4095	84.1818	-2.79954	0.0590537	-2.85859	SRP19	-	chr5_112885352_+
chr4:69188116-69188591:mpeak_61329|chr4_69180041_69215824_YTHDC1_NM_-|	84.1668	-2.71052	1.16695	2.32274	0.0201929	0.116913	0	2.57298	0	13.1136	8.42459	14.4604	61.7076	93.9138	159.111	209.817	243.471	203.409	2.45254	5.48176	-3.80643	-1.0611	-2.74532	YTHDC1	-	chr4_68322399_-
chr4:1345497-1345590:mpeak_59975|chr4_1341103_1379655_UVSSA_NM_+|	15.9625	-2.76988	0.912913	3.03411	0.00241249	0.0263069	4.20734	0	5.34827	18.359	15.1643	22.1726	22.4391	27.0163	17.3819	29.7241	21.0615	8.67623	21.4452	93.6666	-2.54315	0.16869	-2.71184	UVSSA	-	chr4_1351749_+;chr4_1351769_+
chr3:39125632-39125696:mpeak_55278|chr3_39093476_39136138_WDR48_NM_+|	26.9706	-1.63945	0.659855	2.48456	0.0129711	0.0867984	14.0245	5.14596	2.67413	17.4848	20.219	21.2086	28.0489	59.1786	41.4491	41.9634	40.438	31.8129	16.9763	51.5805	-1.4313	0.172006	-1.6033	WDR48	-	chr3_39084191_+
chr3:27449326-27449696:mpeak_54966|chr3_27418336_27525911_SLC4A7_NM_-|	35.9974	-2.72389	1.28315	2.12281	0.0337697	0.168665	0	0	1.33707	7.86815	7.58213	7.71221	49.0856	25.7298	44.1232	104.034	90.9855	93.5105	3.3725	8.02774	-4.11465	-1.27851	-2.83614	SLC4A7	-	chr3_27408157_-
chr3:134267890-134268012:mpeak_57837|chr3_134204574_134293634_CEP63_NM_+|	10.8753	-2.42564	1.22575	1.9789	0.0478277	0.210813	19.6342	20.5838	29.4155	6.99391	11.7944	18.3165	1.40245	6.43245	13.3707	0.874238	1.68492	0	328.374	966.59	0.908176	3.0507	-2.14253	CEP63	-	chr3_134549099_+
chr3:134251614-134251733:mpeak_57834|chr3_134204574_134293634_CEP63_NM_+|	8.02534	-2.63957	1.29778	2.03391	0.0419611	0.194877	9.81712	9.00543	25.4043	10.4909	10.1095	7.71221	1.40245	6.43245	13.3707	0.874238	1.68492	0	208.562	737.55	0.643479	3.0507	-2.40722	CEP63	-	chr3_134532845_+
chr20:47900106-47900232:mpeak_51082|chr20_47894714_47905581_ZFAS1_NR_+|	403.869	-3.79555	0.777122	4.88411	1.039e-06	7.76065e-05	2.80489	9.00543	0	31.4726	20.219	41.9351	569.393	1268.48	1187.32	412.64	639.426	663.732	0.5856	5.45674	-2.98687	0.818145	-3.80502	ZFAS1	-	chr20_49283691_+
chr20:47549126-47549277:mpeak_51023|chr20_47538274_47649559_ARFGEF2_NM_+|	39.3824	-3.76378	1.43547	2.62198	0.00874197	0.0663733	0	0	0	0	1.68492	8.19422	56.0978	66.8975	94.9317	92.6693	64.8693	87.2443	#DIV/0!	6.05382	-Inf	-0.167658	-Inf	ARFGEF2	-	chr20_48932641_+
chr20:21317565-21317772:mpeak_50093|chr20_21283941_21369910_XRN2_NM_+|	12.3645	-3.55001	1.66931	2.12664	0.0334503	0.167778	0	0	0	0	0	7.71221	29.4513	24.4433	16.0448	24.4787	23.5888	22.6546	#DIV/0!	32.7148	-Inf	-0.0160548	-Inf	XRN2	-	chr20_21337043_+
chr2:71359938-71360329:mpeak_45017|chr2_71357443_71376995_MPHOSPH10_NM_+|	20.1911	-3.63244	1.43265	2.53547	0.0112297	0.07897	0	0	0	54.2028	27.8011	42.8992	0	3.85947	4.0112	41.9634	36.2257	31.3308	#DIV/0!	114.046	-Inf	-3.79856	-Inf	MPHOSPH10	-	chr2_71132998_+;chr2_71133139_+
chr2:58311216-58311280:mpeak_44538|chr2_58134785_58386483_VRK2_NM_+|	13.2869	-2.27428	0.946599	2.40258	0.01628	0.101097	4.20734	2.57298	1.33707	21.856	7.58213	15.9064	7.01223	24.4433	17.3819	21.856	16.0067	19.2805	16.6212	79.3524	-2.48184	-0.226595	-2.25525	VRK2	-	chr2_58084122_+
chr2:39274080-39274172:mpeak_44075|chr2_39213456_39347604_SOS1_NM_-|	21.8838	-2.81614	1.34442	2.09468	0.0361993	0.176858	0	0	0	2.62272	3.36983	6.26617	22.4391	19.2974	29.4155	74.3103	58.1296	46.7553	#DIV/0!	6.84099	-Inf	-1.33256	-Inf	SOS1	-	chr2_39046939_-
chr2:3481458-3481510:mpeak_42946|chr2_3383445_3482989_TRAPPC12_NM_+|	21.603	-3.34728	1.40204	2.38743	0.0169665	0.103945	0	0	0	5.24543	0.842459	9.64026	33.6587	24.4433	17.3819	48.0831	64.0269	55.9135	#DIV/0!	9.36069	-Inf	-1.15442	-Inf	TRAPPC12	-	chr2_3477739_+
chr2:225370662-225370752:mpeak_49003|chr2_225339093_225450114_CUL3_NM_-|	63.5758	-3.28308	1.28619	2.55257	0.0106932	0.0761657	1.40245	0	0	15.7363	5.89721	7.71221	74.3296	92.6273	73.5387	134.633	204.717	152.316	1.74944	5.96862	-4.38713	-1.03167	-3.35546	CUL3	-	chr2_224505968_-
chr2:203157941-203158189:mpeak_48373|chr2_203130514_203168108_NOP58_NM_+|	85.732	-3.10817	0.798048	3.89472	9.83141e-05	0.00286008	4.20734	1.28649	1.33707	8.74238	16.0067	10.6043	151.464	213.557	248.694	119.771	146.588	106.525	1.11304	9.48108	-2.3717	0.718847	-3.09055	NOP58	-	chr2_202293497_+
chr2:203152241-203152368:mpeak_48371|chr2_203130514_203168108_NOP58_NM_+|	83.6703	-3.03457	1.3119	2.31312	0.020716	0.11878	2.80489	0	0	8.74238	5.89721	0	151.464	213.557	248.694	119.771	146.588	106.525	1.3711	5.88908	-2.38386	0.718847	-3.10271	NOP58	-	chr2_202287590_+
chr19:39335164-39335419:mpeak_41305|chr19_39327420_39342979_HNRNPL_NM_-mpeak_41305|chr19_39327420_39342979_HNRNPL_NM_-||	147.48	-3.57993	0.558809	6.40636	1.49039e-10	3.43245e-08	2.80489	9.00543	2.67413	33.2211	37.0682	27.4747	336.587	340.92	393.098	169.602	187.868	229.438	1.35292	16.6574	-2.7548	0.867218	-3.62201	HNRNPL	-	chr19_38844735_-
chr19:12884498-12884571:mpeak_40098|chr19_12874245_12886434_HOOK2_NM_-|	78.5105	-3.55021	0.891002	3.98451	6.76197e-05	0.00218998	2.80489	2.57298	0	23.6044	37.9106	18.7985	85.5492	177.536	114.988	149.495	179.444	149.424	2.13367	16.7893	-3.90054	-0.339441	-3.5611	HOOK2	-	chr19_12773684_-
chr16:2806821-2807073:mpeak_29970|chr16_2802329_2820858_SRRM2_NM_+|	148.901	-4.5787	1.35493	3.37928	0.000726755	0.012003	0	0	1.33707	20.9817	27.8011	4.82013	173.903	257.298	258.054	339.204	349.62	353.798	0.581962	5.14117	-5.32517	-0.597107	-4.72806	SRRM2	-	chr16_2757006_+
chr16:2386860-2386981:mpeak_29915|chr16_2326806_2390747_ABCA3_NM_-|	53.4528	-2.02456	0.772076	2.62223	0.00873572	0.0663733	5.60978	1.28649	2.67413	7.86815	7.58213	8.67623	159.879	106.779	104.291	89.1723	96.0403	51.5754	2.57998	10.1891	-1.33397	0.647624	-1.98159	ABCA3	-	chr16_2336825_-
chr15:52673851-52673908:mpeak_27996|chr15_52606045_52821247_MYO5A_NM_-|	65.2929	-3.51201	1.10993	3.16416	0.00155529	0.0200231	0	2.57298	0	7.86815	5.05475	6.26617	143.049	163.384	161.785	96.1662	108.677	88.6904	1.64858	6.53726	-2.89877	0.673656	-3.57243	MYO5A	-	chr15_52381643_-
chr14:97321557-97321623:mpeak_26467|chr14_97263683_97347513_VRK1_NM_+|	56.8523	-1.56626	0.76439	2.04903	0.040459	0.19034	14.0245	3.85947	1.33707	20.9817	5.89721	13.0143	78.5369	136.368	149.751	81.3042	85.0883	92.0645	5.27099	15.4352	-1.05346	0.496614	-1.55008	VRK1	-	chr14_96855297_+
chr14:76151257-76151345:mpeak_25836|chr14_76127550_76420766_TTLL5_NM_+|	35.1288	-3.30883	1.15291	2.86998	0.00410503	0.03872	0	0	2.67413	6.11967	9.26704	4.82013	72.9271	81.0489	76.2128	40.215	59.8146	68.4458	3.48514	11.9939	-2.9177	0.45028	-3.36798	TTLL5	-	chr14_75684995_+
chr13:34409524-34409586:mpeak_22293|chr13_34392205_34540223_RFC3_NM_+|	4.88234	-2.4534	1.24255	1.97449	0.0483259	0.212444	0	3.85947	1.33707	3.49695	3.36983	6.74818	11.2196	5.14596	10.6965	5.24543	1.68492	5.78416	28.8035	107.082	-1.38957	1.0898	-2.47937	RFC3	-	chr13_33835437_+;chr13_33835468_+
chr12:30784818-30784879:mpeak_17709|chr12_30783891_30848929_IPO8_NM_-|	64.6547	-2.98962	1.12336	2.66133	0.00778338	0.0611098	1.40245	0	1.33707	6.99391	5.89721	4.82013	134.635	163.384	118.999	118.022	122.999	97.3666	0.985393	5.23401	-2.69267	0.301432	-2.99411	IPO8	-	chr12_30631940_-
chr10:76014580-76014640:mpeak_11003|chr10_75910942_76468078_ADK_NM_+|	103.481	-1.61089	0.684282	2.35413	0.0185659	0.110688	4.20734	1.28649	8.0224	5.24543	6.73967	9.15825	200.55	306.185	280.784	104.909	154.17	160.51	1.71631	5.03906	-0.645511	0.908337	-1.55385	ADK	-	chr10_74254875_+
chr10:102134192-102134254:mpeak_11864|chr10_102133332_102147793_OLMALINC_NR_+|	19.8568	-5.00059	0.846028	5.91067	3.40723e-09	6.48401e-07	1.40245	6.43245	0	39.3407	55.6023	59.7696	18.2318	18.0109	10.6965	10.4909	10.1095	8.19422	25.0374	537.298	-4.30353	0.704995	-5.00853	OLMALINC	-	chr10_100374497_+
chr1:893571-893701:mpeak_41|chr1_880180_894679_NOC2L_NM_-|	81.9473	-1.55833	0.541261	2.87906	0.00398858	0.0379671	11.2196	9.00543	1.33707	14.8621	15.1643	9.15825	204.757	196.833	175.156	121.519	112.047	112.309	3.73857	11.3291	-0.86179	0.737684	-1.59947	NOC2L	-	chr1_958241_-
chr9:96295332-96295388:mpeak_82276|chr9_96213977_96326510_FAM120A_NM_+|	5430.2	-1.81221	0.622029	2.91338	0.00357542	0.0349986	0	14.1514	0	6.11967	11.7944	10.1223	13657	13572.5	14747.8	6976.42	8162.58	8003.83	0.101136	0.121145	-0.986355	0.859045	-1.8454	FAM120A	chr9:96295385:+	chr9_93533100_+
chr9:96294787-96294874:mpeak_82275|chr9_96213977_96326510_FAM120A_NM_+|	5449.85	-0.947386	0.380424	2.49035	0.0127619	0.0859534	25.244	59.1786	50.8085	38.4665	45.4928	58.8056	13657	13572.5	14747.8	6976.42	8162.58	8003.83	0.322153	0.616886	-0.0782135	0.859045	-0.937259	FAM120A	chr9:96294871:+	chr9_93532581_+
chr9:96212980-96213043:mpeak_82264|chr9_96209979_96215874_FAM120AOS_NM_-|	317.585	-3.07446	1.11518	2.75691	0.00583499	0.0500807	0	1.28649	1.33707	0.874238	5.89721	8.19422	753.113	654.824	784.858	515.801	518.954	565.883	0.179467	0.934981	-2.51206	0.454124	-2.96618	FAM120AOS	chr9:96212985:-	chr9_93450704_-
chr9:140624363-140624429:mpeak_84198|chr9_140513443_140729224_EHMT1_NM_+|	31.8229	-2.99698	1.35594	2.21026	0.0270873	0.143319	0	0	0	2.62272	0.842459	6.74818	28.0489	47.6001	50.8085	81.3042	83.4034	80.4962	#DIV/0!	4.16525	-Inf	-0.955327	-Inf	EHMT1	chr9:140624423:+	chr9_137729977_+
chr9:139366219-139366352:mpeak_84058|chr9_139336275_139378211_SEC16A_NM_-|	298.23	-2.37517	0.956111	2.4842	0.0129844	0.0868178	0	1.28649	2.67413	12.2393	1.68492	7.23019	573.6	607.223	585.635	537.657	546.756	702.775	0.336319	1.18367	-2.41716	-0.0168306	-2.40033	SEC16A	chr9:139366221:-;chr9:139366277:-	chr9_136471770_-
chr9:133457057-133457126:mpeak_83753|chr9_133454959_133512400_FUBP3_NM_+|	190.132	-3.06735	0.783621	3.91433	9.06573e-05	0.00270128	1.40245	5.14596	0	8.74238	7.58213	11.5683	375.855	566.056	545.523	220.308	260.32	279.085	0.660373	3.67149	-2.09068	0.969299	-3.05998	FUBP3	chr9:133457108:+	chr9_130581739_+
chr8:99056879-99056964:mpeak_79431|chr8_99054078_99057818_RPL30_NM_-|	5096.59	-1.41765	0.581873	2.43635	0.0148363	0.094987	9.81712	18.0109	8.0224	13.1136	23.5888	8.19422	10141.1	16067	15848.3	5749.87	7268.73	6003.47	0.0852438	0.236024	-0.324619	1.14465	-1.46927	RPL30	chr8:99056882:-;chr8:99056911:-	chr8_98044655_-;chr8_98044701_-
chr8:99054914-99055182:mpeak_79430|chr8_99054078_99057818_RPL30_NM_-|	5112.96	-1.53531	0.464395	3.30604	0.000946234	0.01429	47.6831	48.8866	22.7301	62.0709	58.1296	37.597	10141.1	16067	15848.3	5749.87	7268.73	6003.47	0.283667	0.82955	-0.403482	1.14465	-1.54813	RPL30	chr8:99054905:-;chr8:99054944:-;chr8:99055059:-;chr8:99055127:-	chr8_98042688_-;chr8_98042745_-;chr8_98042832_-;chr8_98042901_-
chr8:48921494-48921661:mpeak_78377|chr8_48920994_48973241_UBE2V2_NM_+|	534.065	-1.70451	0.613558	2.77808	0.00546812	0.0477726	0	10.2919	1.33707	7.86815	8.42459	11.5683	1248.18	1129.54	1294.28	923.196	819.712	954.386	0.475041	1.03293	-1.26052	0.445052	-1.70558	UBE2V2	chr8:48921541:+;chr8:48921629:+	chr8_48008980_+;chr8_48009054_+
chr8:30572353-30572413:mpeak_78005|chr8_30537186_30585486_GSR_NM_-|	520.989	-1.04047	0.501984	2.07271	0.0381991	0.182963	5.60978	16.7244	2.67413	7.86815	11.7944	9.15825	1326.71	1380.4	1292.94	724.744	793.596	679.638	0.625198	1.31124	-0.204705	0.863845	-1.06855	GSR	chr8:30572359:-	-
chr8:26196401-26196506:mpeak_77828|chr8_26149006_26227649_PPP2R2A_NM_+|	157.591	-3.16888	1.28713	2.46196	0.0138178	0.0904212	1.40245	0	0	2.62272	3.36983	12.0503	244.025	232.855	255.38	391.659	376.579	371.15	0.574569	1.58356	-3.68541	-0.637831	-3.04758	PPP2R2A	chr8:26196503:+	-
chr8:144883581-144883743:mpeak_80653|chr8_144873478_144897549_SCRIB_NM_-|	120.847	-2.94457	1.25086	2.35403	0.0185709	0.110688	0	0	1.33707	6.11967	5.05475	7.23019	175.306	190.401	163.122	299.864	332.771	268.963	0.758507	2.04133	-3.78292	-0.769685	-3.01324	SCRIB	chr8:144883650:-	-
chr8:141930216-141930274:mpeak_80500|chr8_141669777_142011412_PTK2_NM_-|	108.492	-3.6375	1.40042	2.59743	0.00939251	0.0695918	0	0	0	0	0.842459	7.23019	200.55	221.276	209.919	166.105	294.018	201.963	#DIV/0!	1.82891	-Inf	-0.0676768	-Inf	PTK2	chr8:141930213:-	-
chr8:141466613-141466711:mpeak_80443|chr8_140743471_141468678_TRAPPC9_NM_-|	86.6886	-2.79452	1.12845	2.47642	0.0132706	0.088162	0	2.57298	0	5.24543	8.42459	3.37409	183.72	192.974	169.807	156.489	183.656	134	1.41243	3.59471	-2.72776	0.204899	-2.93266	TRAPPC9	chr8:141466612:-	chr8_140456514_-
chr8:124823506-124823685:mpeak_80153|chr8_124780881_124824758_FAM91A1_NM_+|	320.881	-0.906028	0.408752	2.21657	0.0266525	0.141651	19.6342	16.7244	17.3819	16.6105	20.219	28.4388	741.893	854.23	640.455	502.687	512.215	480.085	2.4028	4.36581	-0.280373	0.58116	-0.861534	FAM91A1	chr8:124823678:+	chr8_123811390_+;chr8_123811445_+
chr8:100897945-100898007:mpeak_79507|chr8_100890493_100906242_COX6C_NM_-|	2047.65	-1.89362	0.685744	2.76141	0.00575529	0.0497054	2.80489	42.4542	20.056	34.0953	50.5475	32.2949	4325.14	6384.85	5805.54	2139.26	2951.13	2783.62	0.395477	1.48511	-0.840252	1.06865	-1.9089	COX6C	chr8:100897949:-	chr8_99885723_-
chr7:91974343-91974468:mpeak_75341|chr7_91875547_92027525_ANKIB1_NM_+|	100.976	-2.09407	0.873081	2.39848	0.0164631	0.101635	1.40245	0	4.0112	3.49695	8.42459	4.33812	274.879	185.255	243.346	145.998	175.231	165.33	1.15433	3.34176	-1.58662	0.531893	-2.11852	ANKIB1	chr7:91974458:+	chr7_92345143_+
chr7:80385474-80385701:mpeak_75171|chr7_80374623_80548667_SEMA3C_NM_-|	486.703	-3.05347	1.09434	2.79023	0.00526712	0.0464207	0	1.28649	1.33707	1.74848	8.42459	6.74818	1084.09	1061.35	1108.43	820.91	850.041	896.062	0.120943	0.65918	-2.68924	0.342068	-3.03131	SEMA3C	chr7:80385641:-	-
chr7:44664544-44664683:mpeak_74343|chr7_44646120_44747477_OGDH_NM_+|	251.788	-5.56713	1.27393	4.37004	1.24222e-05	0.000562799	0	0	0	1.74848	8.42459	10.6043	594.637	671.548	572.265	368.929	458.297	334.999	#DIV/0!	1.78772	-Inf	0.6616	-Inf	OGDH	chr7:44664595:+;chr7:44664677:+	chr7_44624976_+;chr7_44624995_+;chr7_44625077_+
chr7:44647245-44647304:mpeak_74341|chr7_44646120_44747477_OGDH_NM_+|	253.432	-6.48165	1.23909	5.23097	1.6862e-07	1.68437e-05	0	0	0	11.3651	11.7944	17.3525	594.637	671.548	572.265	368.929	458.297	334.999	#DIV/0!	3.48573	-Inf	0.6616	-Inf	OGDH	chr7:44647297:+	chr7_44607697_+
chr7:33037512-33037608:mpeak_74063|chr7_32997015_33044786_FKBP9_NM_+|	150.574	-1.85148	0.862353	2.14702	0.0317921	0.161548	0	7.71894	0	9.61662	1.68492	2.89208	486.648	324.196	406.468	170.476	180.286	216.906	1.90229	2.50034	-0.878767	1.10058	-1.97935	FKBP9	chr7:33037603:+	-
chr7:26237768-26237914:mpeak_73844|chr7_26231958_26240413_HNRNPA2B1_NM_-mpeak_73844|chr7_26231958_26240413_HNRNPA2B1_NM_-||	386.517	-5.04007	1.30384	3.86556	0.000110837	0.00310455	0	1.28649	0	13.1136	4.21229	5.78416	718.052	1165.56	1247.48	393.407	604.885	484.423	0.123263	1.55863	-4.16701	1.07843	-5.24543	HNRNPA2B1	chr7:26237791:-	-
chr7:1066213-1066335:mpeak_73159|chr7_1037440_1177893_C7orf50_NM_-|	373.432	-4.43722	0.947466	4.68326	2.82353e-06	0.000173407	0	3.85947	0	21.856	16.8492	9.64026	1002.75	1083.22	794.218	431.874	597.303	519.61	0.402002	3.1215	-3.6469	0.895026	-4.54193	C7orf50	chr7:1066214:-;chr7:1066262:-	chr7_1026579_-;chr7_1026628_-
chr7:1064116-1064229:mpeak_73158|chr7_1037440_1177893_C7orf50_NM_-|	375.5	-2.02343	0.603458	3.35305	0.00079925	0.0127926	2.80489	16.7244	4.0112	17.4848	24.4313	11.5683	1002.75	1083.22	794.218	431.874	597.303	519.61	0.817323	3.45331	-1.18397	0.895026	-2.079	C7orf50	chr7:1064115:-;chr7:1064148:-	chr7_1024505_-
chr6:33376052-33376111:mpeak_69857|chr6_33359312_33377422_KIFC1_NM_+|	100.961	-3.05166	1.26897	2.40483	0.0161798	0.100787	0	0	0	9.61662	5.05475	5.78416	75.732	83.6219	120.336	299.864	308.34	303.186	#DIV/0!	2.24443	-Inf	-1.70424	-Inf	KIFC1	chr6:33376110:+	chr6_33408333_+
chr6:33240369-33240628:mpeak_69813|chr6_33239851_33244167_RPS18_NM_+|	2277.3	-5.66616	1.23498	4.58805	4.47403e-06	0.000252651	1.40245	0	0	15.7363	6.73967	14.9424	5783.68	6343.68	5804.21	2732.87	3490.31	3134.05	0.0234633	0.399887	-4.73773	0.93835	-5.67608	RPS18	chr6:33240495:+	chr6_33272643_+;chr6_33272696_+
chr6:170702019-170702071:mpeak_73068|chr6_170599790_170713850_FAM120B_NM_+|	57.219	-3.52143	1.35891	2.59136	0.00955985	0.0705166	0	0	0	1.74848	12.6369	5.78416	44.8782	66.8975	86.9093	121.519	152.485	193.769	#DIV/0!	4.31181	-Inf	-1.23533	-Inf	FAM120B	chr6:170702072:+	chr6_170392983_+
chr6:125615403-125615465:mpeak_71904|chr6_125597389_125623282_HDDC2_NM_-|	93.354	-2.01983	0.80233	2.51746	0.0118206	0.0816025	1.40245	2.57298	4.0112	1.74848	9.26704	7.23019	218.781	292.033	184.515	109.28	128.896	160.51	1.14861	4.57646	-1.1919	0.802444	-1.99434	HDDC2	chr6:125615409:-	chr6_125294247_-;chr6_125294290_-
chr6:107585376-107585442:mpeak_71492|chr6_107475981_107780779_PDSS2_NM_-|	141.219	-2.25838	0.769719	2.93403	0.00334589	0.0333022	2.80489	1.28649	4.0112	5.24543	3.36983	13.4964	330.977	380.801	311.537	220.308	197.135	223.654	0.791798	3.44903	-1.44835	0.674635	-2.12299	PDSS2	chr6:107585390:-	chr6_107264187_-
chr5:77062978-77063082:mpeak_65418|chr5_76989177_77072185_TBCA_NM_-|	1750.43	-2.66012	0.986893	2.69545	0.00702928	0.0570252	1.40245	2.57298	0	5.24543	4.21229	3.8561	3309.77	5789.21	4765.31	1997.63	2721.14	2404.76	0.0430108	0.186899	-1.74374	0.960707	-2.70445	TBCA	chr5:77062985:-	-
chr5:76787318-76787371:mpeak_65411|chr5_76729112_76788332_WDR41_NM_-|	67.779	-4.60231	1.34764	3.41508	0.000637631	0.0109839	0	0	0	0	2.52738	8.19422	168.293	150.519	156.437	89.1723	119.629	118.575	#DIV/0!	4.91251	-Inf	0.537734	-Inf	WDR41	chr5:76787318:-	chr5_77491496_-
chr5:463674-463816:mpeak_63763|chr5_443333_466841_EXOC3_NM_+|	91.254	-2.54598	1.01018	2.52032	0.0117248	0.081144	1.40245	2.57298	0	4.37119	11.7944	7.23019	201.952	226.422	106.965	177.47	203.033	151.834	1.1139	4.39492	-2.55707	0.00811502	-2.56518	EXOC3	chr5:463733:+;chr5:463817:+	chr5_463616_+;chr5_463686_+
chr5:176761047-176761132:mpeak_68158|chr5_176759247_176778885_LMAN2_NM_-|	1181.85	-1.78804	0.44225	4.04306	5.27591e-05	0.00184568	14.0245	15.4379	6.68533	16.6105	28.6436	25.5467	2870.81	3353.88	2731.63	1491.45	1848.35	1779.11	0.4036	1.38312	-0.969863	0.807067	-1.77693	LMAN2	chr5:176761053:-	chr5_177334054_-
chr5:16704678-16704741:mpeak_64107|chr5_16666902_16936385_MYO10_NM_-|	49.3966	-2.74942	1.29431	2.12423	0.0336506	0.168387	0	0	0	5.24543	0.842459	3.8561	67.3174	64.3245	60.168	137.255	118.787	134.964	#DIV/0!	2.54318	-Inf	-1.02751	-Inf	MYO10	chr5:16704688:-	-
chr5:151123618-151123677:mpeak_67600|chr5_151122520_151138210_ATOX1_NM_-|	377.595	-5.58128	1.29884	4.29714	1.73018e-05	0.000743259	0	0	0	7.86815	3.36983	2.89208	1464.15	985.452	832.993	438.868	395.956	399.589	#DIV/0!	1.14468	-Inf	1.41101	-Inf	ATOX1	chr5:151123619:-	chr5_151744037_-
chr5:145543455-145543509:mpeak_67406|chr5_145493874_145562294_LARS_NM_-|	81.7677	-3.68739	1.33353	2.76513	0.00569007	0.0492446	0	1.28649	0	0.874238	1.68492	6.74818	157.074	210.984	246.02	99.6632	123.841	133.036	0.628498	2.61046	-2.85493	0.784359	-3.63929	LARS	chr5:145543458:-	chr5_146163883_-
chr5:137897112-137897248:mpeak_67015|chr5_137891803_137911318_HSPA9_NM_-|	518.409	-1.60885	0.571971	2.81282	0.00491091	0.0443051	7.01223	9.00543	0	16.6105	9.26704	7.23019	1250.98	1220.88	1280.91	750.971	826.452	841.595	0.640233	1.36865	-1.04751	0.633535	-1.68104	HSPA9	chr5:137897133:-	-
chr5:134029334-134029394:mpeak_66825|chr5_133984474_134060669_SEC24A_NM_+|	104.361	-2.79773	1.28812	2.17195	0.0298598	0.154151	0	1.28649	0	4.37119	8.42459	2.89208	129.025	196.833	173.819	215.063	250.21	270.409	0.772394	2.13242	-3.60814	-0.558088	-3.05005	SEC24A	chr5:134029386:+	chr5_134693695_+
chr5:10286112-10286178:mpeak_63973|chr5_10280744_10308168_CMBL_NM_-|	108.575	-2.05308	1.01431	2.02412	0.0429576	0.197758	2.80489	0	1.33707	9.61662	4.21229	0.964026	214.574	245.72	258.054	201.075	172.704	191.841	0.864893	2.61535	-1.83652	0.344849	-2.18137	CMBL	chr5:10286125:-	chr5_10286015_-
chr4:48858233-48858387:mpeak_61039|chr4_48833059_48862741_OCIAD1_NM_+|	766.291	-1.75147	0.82046	2.13474	0.0327821	0.165226	4.20734	3.85947	0	3.49695	9.26704	6.74818	1085.49	2395.45	1833.12	1069.19	1372.37	1412.3	0.227702	0.506303	-1.27431	0.463511	-1.73782	OCIAD1	chr4:48858292:+	chr4_48856276_+;chr4_48856375_+
chr4:106393983-106394035:mpeak_62234|chr4_106290910_106395227_PPA2_NM_-|	279.773	-2.88284	1.01755	2.83313	0.00460947	0.0423224	2.80489	0	1.33707	6.99391	6.73967	2.41006	527.319	822.067	865.082	267.517	448.188	406.819	0.280561	1.43816	-1.96258	0.980215	-2.9428	PPA2	chr4:106393981:-	chr4_105472802_-
chr4:102269344-102269414:mpeak_62120|chr4_102268933_102269480_FLJ20021_NR_+|	97.8427	-2.77911	1.29916	2.13916	0.0324224	0.164111	0	0	0	14.8621	18.5341	14.9424	15.4269	50.1731	41.4491	294.618	379.949	344.157	#DIV/0!	4.74501	-Inf	-3.25042	-Inf	FLJ20021	chr4:102269402:+	chr4_101348241_+
chr4:102247592-102247653:mpeak_62108|chr4_101947218_102268628_PPP3CA_NM_-|	6603.94	-1.85841	0.940126	1.97677	0.0480678	0.211534	0	2.57298	1.33707	3.49695	3.36983	5.78416	12371	14304.5	14529.9	11651.8	12334.4	14039.1	0.0142338	0.0332697	-1.69399	0.115869	-1.80986	PPP3CA	chr4:102247591:-	chr4_101326435_-
chr3:99865849-99865908:mpeak_56677|chr3_99536677_99897148_CMSS1_NM_+|	207.874	-1.77038	0.888099	1.99345	0.0462119	0.206323	2.80489	2.57298	0	1.74848	3.36983	5.30214	478.234	512.023	541.512	250.906	387.531	308.488	0.526633	1.10045	-0.954311	0.693876	-1.64819	CMSS1	chr3:99865872:+	chr3_100147028_+
chr3:196028136-196028241:mpeak_59633|chr3_196018245_196045165_TCTEX1D2_NM_-|	76.0584	-4.63065	1.35997	3.40497	0.000661725	0.0111967	0	0	0	1.74848	1.68492	5.30214	137.44	277.882	176.493	77.8072	122.999	111.345	#DIV/0!	2.7985	-Inf	0.9229	-Inf	TCTEX1D2	chr3:196028142:-	-
chr3:152020473-152020596:mpeak_58389|chr3_151985828_152180173_MBNL1_NM_+|	557.414	-2.25264	0.684784	3.28956	0.00100345	0.0148919	1.40245	5.14596	2.67413	6.99391	16.8492	8.19422	1103.72	1371.4	1434.67	876.861	855.095	1005.96	0.235883	1.17013	-1.79652	0.514014	-2.31053	MBNL1	chr3:152020539:+;chr3:152020591:+	chr3_152302799_+
chr3:12880558-12880616:mpeak_54584|chr3_12877722_12883081_RPL32_NM_-|	4419.99	-1.71086	0.668861	2.55787	0.0105314	0.0754025	1.40245	9.00543	0	2.62272	4.21229	7.23019	12594	12239.7	12049.6	4877.38	5764.1	5490.61	0.0423276	0.0871877	-0.434454	1.19303	-1.62749	RPL32	chr3:12880565:-	chr3_12839059_-
chr22:19495325-19495397:mpeak_52949|chr22_19467348_19508003_CDC45_NM_+|	106.357	-2.01606	0.877539	2.2974	0.0215961	0.121634	2.80489	0	2.67413	5.24543	3.36983	7.71221	171.098	254.725	274.099	167.854	186.183	200.517	1.17421	2.94425	-1.57531	0.335865	-1.91118	CDC45	chr22:19495396:+	chr22_19507872_+
chr21:46381594-46381672:mpeak_52679|chr21_46359954_46396594_FAM207A_NM_+|	248.027	-4.15246	1.30024	3.1936	0.00140509	0.0186992	0	0	0	0	2.52738	6.26617	598.844	553.191	506.748	431.874	503.79	373.078	#DIV/0!	1.00786	-Inf	0.341945	-Inf	FAM207A	chr21:46381646:+;chr21:46381674:+	-
chr21:46219900-46219957:mpeak_52654|chr21_46191404_46221751_UBE2G2_NM_-|	190.649	-1.43677	0.571809	2.51268	0.0119817	0.0822689	2.80489	10.2919	4.0112	6.11967	9.26704	10.6043	567.99	446.412	415.828	270.14	279.696	264.625	1.19617	3.19119	-0.60334	0.81233	-1.41567	UBE2G2	chr21:46219902:-	chr21_44799988_-
chr21:44475167-44475223:mpeak_52532|chr21_44474093_44496472_CBS_NM_-|	120.02	-1.77658	0.688317	2.58106	0.00984983	0.071948	1.40245	1.28649	8.0224	6.11967	6.73967	8.19422	364.636	240.574	283.458	152.992	183.656	183.165	1.20533	4.05022	-0.974926	0.773652	-1.74858	CBS	chr21:44475167:-	-
chr21:44268152-44268266:mpeak_52504|chr21_44263391_44299699_WDR4_NM_-|	170.851	-6.05109	1.26601	4.77966	1.75595e-06	0.000119333	0	0	0	12.2393	16.0067	14.4604	337.989	470.856	263.402	254.403	372.367	308.488	#DIV/0!	4.56627	-Inf	0.1972	-Inf	WDR4	chr21:44268151:-;chr21:44268201:-	chr21_42848121_-
chr21:44265281-44265334:mpeak_52500|chr21_44263391_44299699_WDR4_NM_-|	168.314	-4.13586	1.32012	3.13294	0.00173063	0.0214273	0	0	0	6.11967	4.21229	1.92805	337.989	470.856	263.402	254.403	372.367	308.488	#DIV/0!	1.31087	-Inf	0.1972	-Inf	WDR4	chr21:44265282:-	-
chr21:42573808-42573878:mpeak_52429|chr21_42539727_42647297_BACE2_NM_+|	180.727	-3.68362	1.30809	2.81602	0.00486223	0.0440576	1.40245	0	0	0	4.21229	4.82013	534.332	344.779	526.804	240.416	240.101	271.855	0.29926	1.80079	-2.68717	0.901993	-3.58916	BACE2	chr21:42573863:+	chr21_41201931_+
chr21:37605904-37605956:mpeak_52239|chr21_37536838_37665617_DOPEY2_NM_+|	66.6339	-3.18668	1.34687	2.36598	0.0179824	0.108906	0	0	0	3.49695	0	8.67623	92.5614	70.757	96.2688	182.716	183.656	161.474	#DIV/0!	3.4593	-Inf	-1.0239	-Inf	DOPEY2	chr21:37605956:+	chr21_36233656_+
chr20:62559010-62559071:mpeak_51797|chr20_62526454_62562817_DNAJC5_NM_+|	320.523	-2.71203	1.26003	2.15235	0.0313696	0.160052	0	0	0	8.74238	5.89721	5.78416	225.794	297.179	224.627	849.76	1128.05	1100.44	#DIV/0!	0.663486	-Inf	-2.04177	-Inf	DNAJC5	chr20:62559067:+	chr20_63927713_+
chr20:47760281-47760364:mpeak_51061|chr20_47731430_47804904_STAU1_NM_-|	556.579	-1.26879	0.559189	2.26898	0.0232695	0.128373	8.41467	14.1514	0	20.1075	18.5341	14.9424	896.162	1301.93	1160.57	920.573	1230.83	1092.72	1.00781	1.65172	-1.24765	0.0500569	-1.2977	STAU1	chr20:47760278:-;chr20:47760307:-	chr20_49143751_-;chr20_49143798_-;chr20_49143823_-
chr20:47247845-47247897:mpeak_50991|chr20_47242465_47444420_PREX1_NM_-|	508.921	-2.28199	1.14388	1.99496	0.046047	0.205986	0	1.28649	1.33707	1.74848	2.52738	4.82013	924.211	1146.26	1378.52	856.754	859.308	930.285	0.114101	0.343719	-1.79371	0.382172	-2.17588	PREX1	chr20:47247844:-	-
chr20:46340428-46340499:mpeak_50955|chr20_46287136_46415360_SULF2_NM_-|	326.477	-4.24059	1.28999	3.2873	0.00101151	0.0149604	0	0	0	2.62272	1.68492	7.71221	720.857	515.883	744.746	619.835	620.892	683.494	#DIV/0!	0.62466	-Inf	0.0423078	-Inf	SULF2	chr20:46340428:-	-
chr20:34362720-34362802:mpeak_50447|chr20_34359922_34535406_PHF20_NM_+|	45.1808	-2.73669	1.32355	2.06769	0.0386694	0.184469	0	0	0	2.62272	4.21229	7.71221	60.3051	33.4488	33.4267	115.399	149.115	135.928	#DIV/0!	3.63279	-Inf	-1.65472	-Inf	PHF20	chr20:34362804:+	chr20_35774880_+;chr20_35774910_+
chr20:30129371-30129560:mpeak_50196|chr20_30102212_30156922_HM13_NM_+|	781.949	-3.75989	0.944582	3.98048	6.87751e-05	0.00221873	1.40245	2.57298	0	8.74238	8.42459	13.0143	2330.86	2076.4	1540.3	1036.85	1379.1	985.716	0.100262	0.887251	-2.92447	0.806056	-3.73053	HM13	chr20:30129536:+;chr20:30129562:+	chr20_31541745_+
chr2:86396437-86396490:mpeak_45455|chr2_86372004_86422893_IMMT_NM_-|	162.367	-2.76099	1.21367	2.2749	0.0229118	0.127235	0	2.57298	0	0	3.36983	8.67623	375.855	364.077	363.682	197.578	329.401	303.186	0.699424	2.17657	-2.22705	0.410765	-2.63782	IMMT	chr2:86396436:-	chr2_86169316_-
chr2:55843225-55843345:mpeak_44509|chr2_55777142_55844860_SMEK2_NM_-|	110.309	-1.97901	0.98228	2.01471	0.0439346	0.200695	0	3.85947	0	6.99391	5.05475	5.78416	140.245	249.579	223.29	201.075	267.059	220.762	1.88846	2.58861	-2.20806	-0.168132	-2.03993	SMEK2	chr2:55843228:-;chr2:55843287:-	chr2_55616093_-;chr2_55616153_-
chr2:26419236-26419353:mpeak_43519|chr2_26414264_26467594_HADHA_NM_-|	129.59	-2.27387	0.996388	2.28211	0.0224827	0.125716	0	3.85947	0	1.74848	4.21229	5.30214	388.477	328.055	235.324	201.075	213.984	173.043	1.2164	1.91513	-1.5451	0.694677	-2.23978	HADHA	chr2:26419238:-	chr2_26196370_-
chr2:216211914-216212092:mpeak_48696|chr2_216176678_216214258_ATIC_NM_+|	324.187	-1.45246	0.692917	2.09616	0.036068	0.176425	0	5.14596	5.34827	6.99391	2.52738	11.0863	711.04	774.467	712.657	497.442	511.372	652.164	0.716113	1.24069	-0.973579	0.404266	-1.37785	ATIC	chr2:216212072:+	chr2_215347347_+
chr2:192283877-192283933:mpeak_48091|chr2_192110106_192288562_MYO1B_NM_+|	185.816	-3.70457	1.30272	2.84372	0.00445897	0.0413065	0	0	0	8.74238	0.842459	3.37409	265.062	382.088	319.559	472.089	427.127	350.905	#DIV/0!	1.03661	-Inf	-0.370914	-Inf	MYO1B	chr2:192283927:+	chr2_191419201_+
chr2:178081044-178081118:mpeak_47736|chr2_178077421_178084135_HNRNPA3_NM_+mpeak_47736|chr2_178077421_178084135_HNRNPA3_NM_+||	646.54	-1.62663	0.670887	2.4246	0.0153252	0.0970677	1.40245	6.43245	4.0112	4.37119	10.1095	5.78416	1262.2	1902.72	1862.53	804.299	996.629	897.99	0.235628	0.750851	-0.774568	0.897447	-1.67201	HNRNPA3	chr2:178081109:+	chr2_177216380_+
chr2:1656847-1656904:mpeak_42934|chr2_1638095_1748319_PXDN_NM_-|	610.933	-4.27614	1.29063	3.31322	0.000922287	0.0141344	0	0	0	0	7.58213	3.37409	1629.64	1296.78	1228.76	983.518	1189.55	991.983	#DIV/0!	0.519243	-Inf	0.392684	-Inf	PXDN	chr2:1656853:-	chr2_1653075_-
chr2:152683570-152683637:mpeak_47096|chr2_152659838_152685009_ARL5A_NM_-|	327.146	-2.18487	1.04535	2.09009	0.0366101	0.177713	2.80489	1.28649	0	4.37119	8.42459	0	767.138	840.078	819.622	446.736	534.961	500.329	0.252883	1.2951	-1.64501	0.711506	-2.35651	ARL5A	chr2:152683553:-;chr2:152683584:-	chr2_151827065_-
chr19:54622136-54622194:mpeak_42509|chr19_54618789_54634737_PRPF31_NM_+|	121.195	-4.61705	1.28336	3.59762	0.000321141	0.00684469	0	0	0	6.11967	2.52738	3.37409	280.489	344.779	252.706	162.608	212.3	189.431	#DIV/0!	2.13013	-Inf	0.637616	-Inf	PRPF31	chr19:54622189:+	chr19_54118813_+
chr19:50374585-50374726:mpeak_42107|chr19_50373317_50381613_AKT1S1_NM_-|	241.439	-4.25551	1.26637	3.36039	0.000778331	0.0126043	0	0	1.33707	0.874238	8.42459	5.30214	632.503	540.326	696.612	339.204	355.518	317.165	0.214567	1.44295	-3.44892	0.885559	-4.33448	AKT1S1	chr19:50374626:-;chr19:50374655:-	chr19_49871370_-;chr19_49871399_-
chr19:42373029-42373267:mpeak_41519|chr19_42363987_42375418_RPS19_NM_+|	4540.37	-1.40003	0.670843	2.08696	0.0368914	0.17866	16.8293	1.28649	0	8.74238	5.05475	5.78416	13773.4	12003	12691.4	4601.99	6042.96	5333.96	0.0706402	0.122545	-0.112225	1.26748	-1.37971	RPS19	chr19:42373174:+;chr19:42373203:+;chr19:42373243:+;chr19:42373275:+	-
chr19:36706404-36706459:mpeak_41106|chr19_36705503_36726560_ZNF146_NM_+|	143.291	-2.78381	1.26623	2.1985	0.0279132	0.146566	0	0	0	2.62272	5.89721	6.26617	158.476	136.368	128.358	478.208	368.997	434.294	#DIV/0!	1.15381	-Inf	-1.59841	-Inf	ZNF146	chr19:36706503:+	-
chr19:35752153-35752316:mpeak_41025|chr19_35739558_35758726_LSR_NM_+|	353.838	-1.47286	0.63631	2.31469	0.0206298	0.118368	1.40245	7.71894	4.0112	8.74238	2.52738	9.64026	890.553	806.63	951.992	442.365	542.543	577.934	0.495724	1.33795	-0.671043	0.761371	-1.43241	LSR	chr19:35752234:+;chr19:35752305:+	chr19_35261337_+;chr19_35261399_+
chr19:35742241-35742305:mpeak_41024|chr19_35739558_35758726_LSR_NM_+|	353.048	-2.11583	0.778632	2.71737	0.0065803	0.0545572	5.60978	0	1.33707	4.37119	8.42459	4.82013	890.553	806.63	951.992	442.365	542.543	577.934	0.39334	1.12717	-1.34245	0.761371	-2.10382	LSR	chr19:35742304:+	-
chr19:23992043-23992098:mpeak_40797|chr19_23945815_24009871_RPSAP58_NR_+|	1576.85	-2.81563	0.97247	2.89534	0.00378748	0.0364716	1.40245	0	2.67413	1.74848	4.21229	3.8561	4991.3	4905.39	4024.57	1473.09	1963.77	1550.15	0.0439247	0.196849	-1.2679	1.48104	-2.74895	RPSAP58	chr19:23992099:+	-
chr19:1393838-1393893:mpeak_39259|chr19_1383882_1395389_NDUFS7_NM_+|	125.959	-3.16083	0.966775	3.26946	0.00107753	0.0156328	5.60978	0	0	5.24543	3.36983	14.4604	433.356	297.179	251.369	177.47	180.286	143.158	1.71395	4.60671	-2.04036	0.971017	-3.01137	NDUFS7	chr19:1393892:+	chr19_1393890_+
chr19:11169735-11169886:mpeak_39917|chr19_11071597_11172459_SMARCA4_NM_+|	174.786	-1.92981	0.859479	2.24532	0.0247477	0.133711	0	1.28649	4.0112	0.874238	10.1095	4.82013	363.233	416.823	393.098	282.379	314.237	306.56	0.677365	1.74981	-1.57684	0.377313	-1.95416	SMARCA4	chr19:11169892:+	-
chr18:9103742-9103868:mpeak_37986|chr18_9102627_9134183_NDUFV2_NM_+|	441.311	-1.85147	0.719168	2.57446	0.0100397	0.0730167	4.20734	1.28649	2.67413	5.24543	5.89721	7.23019	1061.65	1062.64	1069.65	572.626	710.193	792.429	0.255733	0.885332	-1.16953	0.622056	-1.79158	NDUFV2	chr18:9103805:+	chr18_9103806_+
chr18:72164970-72165054:mpeak_39043|chr18_72163499_72187233_CNDP2_NM_+|	172.364	-2.67406	0.860842	3.10632	0.00189429	0.0225553	1.40245	2.57298	2.67413	8.74238	11.7944	2.89208	583.417	415.536	346.3	275.385	198.82	218.834	0.494298	3.3806	-1.81696	0.95687	-2.77383	CNDP2	chr18:72165055:+	chr18_74497819_+
chr18:3248583-3248641:mpeak_37927|chr18_3247479_3255743_MYL12A_NM_+|	849.336	-2.08083	0.492474	4.22525	2.38674e-05	0.0009845	4.20734	23.1568	17.3819	27.9756	32.8559	22.6546	1980.25	2620.58	2428.11	855.879	1217.35	961.616	0.636597	2.75092	-0.899777	1.21168	-2.11146	MYL12A	chr18:3248639:+	chr18_3248637_+
chr17:7573170-7573286:mpeak_33813|chr17_7573008_7590868_TP53_NM_-|	189.152	-5.14828	1.29013	3.99052	6.59285e-05	0.00215202	0	0	0	9.61662	0.842459	3.8561	471.222	470.856	536.164	235.17	231.676	310.416	#DIV/0!	1.84174	-Inf	0.927407	-Inf	TP53	chr17:7573141:-;chr17:7573201:-	chr17_7669823_-
chr17:62497881-62498174:mpeak_36831|chr17_62496444_62502484_DDX5_NM_-|	372.148	-2.32591	0.931966	2.4957	0.0125709	0.0849434	2.80489	1.28649	0	13.1136	8.42459	9.15825	497.868	675.407	599.006	716.875	1013.48	928.357	0.346281	1.15456	-2.90741	-0.585119	-2.32229	DDX5	chr17:62497893:-	chr17_64501733_-;chr17_64501792_-
chr17:58806605-58806662:mpeak_36510|chr17_58755171_59469337_BCAS3_NM_+|	643.366	-2.92435	1.13956	2.5662	0.010282	0.0743223	0	0	2.67413	0.874238	9.26704	1.92805	1642.26	1765.06	1568.38	848.011	930.917	951.012	0.161231	0.44211	-2.1742	0.866033	-3.04024	BCAS3	chr17:58806663:+	chr17_60729303_+
chr17:58453803-58453953:mpeak_36439|chr17_58256789_58469586_USP32_NM_-|	355.447	-5.25643	1.29292	4.06556	4.79174e-05	0.00173486	1.40245	0	0	30.5983	37.9106	13.9784	387.075	706.283	600.343	770.204	924.177	793.393	0.248411	3.31571	-5.87816	-0.554676	-5.32348	USP32	chr17:58453893:-	-
chr17:57953117-57953355:mpeak_36352|chr17_57937785_57970306_TUBD1_NM_-|	197.669	-3.27108	1.28409	2.54738	0.0108534	0.0768814	0	0	0	1.74848	7.58213	7.71221	182.318	223.849	266.076	451.981	620.05	610.71	#DIV/0!	1.0128	-Inf	-1.32376	-Inf	TUBD1	chr17:57953242:-	-
chr17:49050335-49050459:mpeak_35915|chr17_49043748_49198226_SPAG9_NM_-|	55.4176	-3.14297	1.34525	2.33634	0.0194734	0.114114	0	0	1.33707	0.874238	4.21229	6.74818	75.732	141.514	106.965	83.0526	132.266	112.309	1.23722	3.61224	-3.14588	-0.0151227	-3.13076	SPAG9	chr17:49050334:-;chr17:49050408:-	chr17_50972974_-;chr17_50973048_-
chr17:4869125-4869217:mpeak_33606|chr17_4862938_4871132_SPAG7_NM_-|	638.503	-2.00951	0.871942	2.30464	0.0211869	0.120468	1.40245	1.28649	2.67413	4.37119	9.26704	7.71221	880.736	1501.33	1433.34	1091.05	1281.38	1447.48	0.140564	0.558925	-1.99314	-0.00170373	-1.99143	SPAG7	chr17:4869111:-;chr17:4869148:-	chr17_4965804_-
chr17:39680542-39680740:mpeak_35248|chr17_39680249_39684641_KRT19_NM_-|	2709.54	-3.82126	1.24573	3.06749	0.00215863	0.0243981	1.40245	0	0	6.99391	9.26704	5.30214	5486.37	4913.11	5699.92	4711.27	5453.23	6227.61	0.0261335	0.131546	-3.94255	-0.0259959	-3.91655	KRT19	chr17:39680710:-	-
chr17:3865684-3865772:mpeak_33502|chr17_3828735_3867758_ATP2A3_NM_-|	185.388	-1.19447	0.575257	2.07641	0.0378563	0.181741	1.40245	10.2919	5.34827	6.11967	11.7944	11.5683	486.648	370.509	381.064	289.373	338.668	311.862	1.37638	3.13675	-0.790705	0.397685	-1.18839	ATP2A3	chr17:3865717:-	chr17_3962424_-
chr17:17064889-17064958:mpeak_34158|chr17_16946073_17088136_MPRIP_NM_+|	77.7071	-2.14662	0.937798	2.289	0.0220793	0.12394	1.40245	2.57298	0	6.11967	9.26704	11.0863	124.818	128.649	101.617	201.949	187.868	157.136	1.67936	4.84008	-2.73534	-0.623259	-2.11208	MPRIP	chr17:17064945:+;chr17:17064993:+	chr17_17161631_+
chr17:12905020-12905077:mpeak_34002|chr17_12896362_12921381_ELAC2_NM_-|	214.874	-1.44963	0.706769	2.05107	0.0402605	0.189796	1.40245	6.43245	1.33707	7.86815	7.58213	2.89208	544.149	517.169	474.659	335.708	373.209	306.078	0.597142	1.80714	-0.999876	0.597684	-1.59756	ELAC2	chr17:12905023:-	-
chr16:8900190-8900268:mpeak_30257|chr16_8891669_8941580_PMM2_NM_+|	129.663	-3.88195	1.28215	3.02768	0.00246438	0.0266044	0	0	1.33707	7.86815	14.3218	12.0503	164.086	241.86	173.819	226.428	415.332	298.848	0.691867	3.64023	-4.67855	-0.698125	-3.98043	PMM2	chr16:8900264:+	chr16_8806382_+;chr16_8806407_+
chr16:85700206-85700281:mpeak_32873|chr16_85645028_85706010_GSE1_NM_+|	803.794	-3.26744	1.30479	2.50419	0.0122732	0.0836401	0	0	0	6.11967	11.7944	3.8561	520.307	905.689	1032.22	2270.4	2526.53	2368.61	#DIV/0!	0.303818	-Inf	-1.54347	-Inf	GSE1	chr16:85700282:+	chr16_85666675_+
chr16:81654476-81654543:mpeak_32718|chr16_81478774_81743350_CMIP_NM_+|	202.47	-1.74359	0.641556	2.71776	0.00657265	0.0545484	9.81712	1.28649	0	22.7302	13.4793	12.5323	319.758	342.206	359.671	413.515	464.195	470.445	1.63027	3.61545	-2.13413	-0.400106	-1.73403	CMIP	chr16:81654531:+	chr16_81620926_+
chr16:74694664-74694721:mpeak_32514|chr16_74657969_74700779_RFWD3_NM_-|	265.225	-2.68364	1.27686	2.10176	0.0355745	0.175251	0	0	0	0	8.42459	3.8561	262.257	311.331	311.537	716.001	779.274	790.019	#DIV/0!	0.806068	-Inf	-1.36843	-Inf	RFWD3	chr16:74694662:-	-
chr16:74691775-74691939:mpeak_32513|chr16_74657969_74700779_RFWD3_NM_-|	266.46	-2.87067	1.23972	2.31557	0.0205816	0.118316	0	1.28649	0	7.86815	5.89721	12.0503	262.257	311.331	311.537	716.001	779.274	790.019	0.436037	1.12964	-4.32673	-1.36843	-2.95831	RFWD3	chr16:74691779:-;chr16:74691878:-	chr16_74657884_-;chr16_74657975_-
chr16:312656-312738:mpeak_29701|chr16_284544_319518_ITFG3_NR_+mpeak_29701|chr16_284544_314809_ITFG3_NM_+||	138.05	-5.85052	1.25237	4.67155	2.98942e-06	0.000180915	0	0	0	6.99391	7.58213	7.23019	408.112	376.942	296.829	180.093	205.56	167.258	#DIV/0!	3.94389	-Inf	0.968423	-Inf	ITFG3	chr16:312740:+	chr16_262753_+
chr16:24566202-24566261:mpeak_30986|chr16_24550907_24582196_RBBP6_NM_+|	57.3206	-3.2456	1.42851	2.27202	0.023085	0.128025	0	0	0	2.62272	12.6369	6.74818	22.4391	45.0272	93.5947	204.572	164.279	135.928	#DIV/0!	4.35988	-Inf	-1.64804	-Inf	RBBP6	chr16:24566259:+	chr16_24554938_+
chr16:21976800-21976854:mpeak_30858|chr16_21964608_21994408_UQCRC2_NM_+|	217.924	-5.21333	1.30162	4.00528	6.19452e-05	0.0020626	0	0	0	3.49695	3.36983	4.82013	426.343	733.3	648.477	211.566	290.648	293.064	#DIV/0!	1.46954	-Inf	1.18496	-Inf	UQCRC2	chr16:21976854:+;chr16:21976886:+	chr16_21965485_+;chr16_21965533_+;chr16_21965564_+
chr16:18809230-18809305:mpeak_30669|chr16_18804692_18812857_ARL6IP1_NM_-|	656.162	-1.74356	0.497809	3.50248	0.000460956	0.00875317	5.60978	14.1514	9.35947	17.4848	15.1643	13.0143	1347.75	2045.52	1960.14	748.348	863.52	833.882	0.543964	1.86705	-0.648995	1.13018	-1.77918	ARL6IP1	chr16:18809234:-	chr16_18797910_-;chr16_18797961_-
chr16:14554563-14554616:mpeak_30511|chr16_14530629_14724128_PARN_NM_-|	48.4494	-3.50377	1.3281	2.63818	0.00833523	0.0644253	0	0	0	1.74848	4.21229	4.82013	49.0856	105.492	88.2464	107.531	113.732	106.525	#DIV/0!	3.28898	-Inf	-0.432851	-Inf	PARN	chr16:14554565:-	chr16_14460709_-
chr14:97030671-97030732:mpeak_26457|chr14_96968712_97031291_PAPOLA_NM_+|	482.903	-1.19275	0.541379	2.20318	0.0275822	0.145381	19.6342	19.2974	14.7077	8.74238	18.5341	23.6186	1652.08	1126.97	1210.05	755.342	449.873	495.991	1.34465	2.99171	0.0757641	1.2295	-1.15374	PAPOLA	chr14:97030724:+	chr14_96564388_+
chr14:75642624-75642676:mpeak_25819|chr14_75601709_75643349_TMED10_NM_-|	1792.02	-2.3011	0.85773	2.68278	0.00730132	0.0585447	0	1.28649	4.0112	8.74238	5.05475	2.41006	4393.86	4951.7	4428.37	2203.08	2858.46	2647.22	0.0576926	0.210244	-1.6132	0.83737	-2.45057	TMED10	chr14:75642624:-	chr14_75175922_-
chr14:69896141-69896198:mpeak_25461|chr14_69865095_69925079_SLC39A9_NM_+|	224.359	-2.64534	0.835146	3.16751	0.00153748	0.0199176	0	3.85947	4.0112	8.74238	14.3218	3.8561	427.746	661.256	668.533	216.811	352.99	330.179	0.671737	2.99121	-1.77413	0.965589	-2.73972	SLC39A9	chr14:69896193:+	chr14_69429475_+
chr14:58760906-58760971:mpeak_24995|chr14_58734111_58764855_PSMA3-AS1_NR_-|	60.5458	-3.73984	1.33702	2.79715	0.0051555	0.0456182	0	0	0	12.2393	2.52738	2.89208	109.391	66.8975	88.2464	144.249	148.273	151.834	#DIV/0!	3.97402	-Inf	-0.74826	-Inf	PSMA3-AS1	chr14:58760902:-;chr14:58760970:-	chr14_58294166_-;chr14_58294202_-;chr14_58294252_-
chr14:55531245-55531306:mpeak_24848|chr14_55518361_55531333_MAPK1IP1L_NM_+|	194.705	-3.18805	1.23858	2.57396	0.0100541	0.0730501	0	1.28649	0	8.74238	11.7944	6.74818	225.794	280.455	262.065	499.19	509.687	530.696	0.50233	1.77224	-4.40659	-1.00276	-3.40383	MAPK1IP1L	chr14:55531269:+;chr14:55531303:+	chr14_55064584_+
chr14:24456877-24456948:mpeak_23942|chr14_24439082_24475094_DHRS4L2_NM_+|	136.155	-3.74504	1.30797	2.86324	0.00419337	0.0392851	1.40245	0	0	0.874238	4.21229	5.30214	460.002	292.033	274.099	187.087	206.402	202.445	0.410018	1.74326	-2.889	0.783993	-3.67299	DHRS4L2	chr14:24456929:+	chr14_23987685_+;chr14_23987739_+
chr14:105839188-105839343:mpeak_26852|chr14_105767147_105860890_PACS2_NM_+|	127.49	-2.22744	0.718733	3.09913	0.00194091	0.0228906	2.80489	5.14596	1.33707	6.11967	10.1095	9.15825	371.648	325.482	246.02	156.489	228.306	167.258	0.984776	4.59872	-1.45069	0.77268	-2.22337	PACS2	chr14:105839342:+	-
chr14:104381352-104381469:mpeak_26796|chr14_104379031_104387903_C14orf2_NM_-|	2880.98	-1.70518	0.868594	1.96315	0.0496285	0.21612	0	6.43245	0	6.11967	1.68492	2.89208	9549.25	7613.45	6257.47	3150.75	4602.35	3381.32	0.0823963	0.0960684	-0.73372	1.07272	-1.80644	C14orf2	chr14:104381400:-	chr14_103915113_-;chr14_103915162_-
chr14:103409817-103409905:mpeak_26691|chr14_103400180_103523742_CDC42BPB_NM_-|	78.814	-2.03244	0.892635	2.2769	0.0227924	0.126742	0	3.85947	1.33707	6.11967	7.58213	5.78416	106.586	217.417	165.796	142.501	143.218	145.568	1.59143	4.5181	-1.90681	0.183543	-2.09035	CDC42BPB	chr14:103409818:-;chr14:103409855:-	-
chr13:98645547-98645601:mpeak_23309|chr13_98605928_98673989_IPO5_NM_+|	103.774	-1.83204	0.816163	2.2447	0.0247876	0.133711	0	0	6.68533	3.49695	8.42459	2.41006	266.465	254.725	264.739	134.633	156.697	147.014	2.55188	3.26949	-1.10013	0.842335	-1.94246	IPO5	chr13:98645600:+	chr13_97993343_+
chr13:47351048-47351142:mpeak_22712|chr13_47345631_47371367_ESD_NM_-|	163.204	-2.51146	0.93006	2.70032	0.00692724	0.0566257	0	5.14596	0	4.37119	8.42459	4.33812	263.66	526.175	459.951	191.458	271.272	223.654	1.23524	2.49626	-1.73534	0.864593	-2.59993	ESD	chr13:47351090:-	chr13_46776957_-
chr13:21554174-21554227:mpeak_21859|chr13_21549503_21635722_LATS2_NM_-|	129.083	-3.65928	1.27771	2.86394	0.00418408	0.0392423	0	1.28649	0	1.74848	5.05475	4.33812	253.843	346.066	342.289	196.704	190.396	207.266	0.409624	1.8745	-3.11441	0.664681	-3.77909	LATS2	chr13:21554172:-	-
chr12:76442672-76442742:mpeak_19647|chr12_76442244_76478813_NAP1L1_NM_-|	781.685	-3.94817	1.28228	3.07903	0.00207678	0.0238764	1.40245	0	0	1.74848	5.05475	4.82013	1570.74	2342.7	2152.68	985.267	1251.05	1064.77	0.069358	0.352107	-3.05101	0.877833	-3.92884	NAP1L1	chr12:76442666:-	chr12_76048887_-
chr12:56575025-56575099:mpeak_18895|chr12_56557549_56583351_SMARCC2_NM_-|	195.493	-2.04828	0.965553	2.12135	0.033892	0.169079	1.40245	1.28649	1.33707	0.874238	5.89721	7.23019	426.343	456.704	334.267	333.085	377.421	400.071	0.330728	1.26075	-1.79818	0.132392	-1.93057	SMARCC2	chr12:56575044:-	chr12_56181244_-
chr12:54672394-54672461:mpeak_18727|chr12_54635689_54673915_CBX5_NM_-|	1563.62	-3.41981	0.919645	3.71862	0.000200317	0.00484208	0	0	4.0112	6.11967	9.26704	14.4604	4050.26	3356.45	3397.49	2676.04	2443.97	2805.32	0.111379	0.376604	-2.89548	0.447049	-3.34253	CBX5	chr12:54672405:-	chr12_54278622_-
chr12:51079326-51079429:mpeak_18378|chr12_50898767_51138369_DIP2B_NM_+|	80.1413	-2.99367	1.28516	2.32941	0.0198374	0.115558	0	1.28649	0	8.74238	2.52738	4.82013	150.062	142.8	104.291	204.572	187.868	154.726	0.971784	2.94059	-3.64464	-0.462283	-3.18236	DIP2B	chr12:51079377:+;chr12:51079432:+	chr12_50685646_+
chr12:46316133-46316216:mpeak_18008|chr12_46315977_46384401_SCAF11_NM_-|	279.044	-1.78472	0.684462	2.60748	0.00912119	0.068383	1.40245	2.57298	8.0224	11.3651	24.4313	14.9424	374.453	553.191	556.22	455.478	706.823	639.631	0.808553	2.8158	-2.08032	-0.280186	-1.80013	SCAF11	chr12:46316139:-	chr12_45922358_-
chr12:133131029-133131084:mpeak_21637|chr12_133067156_133159556_FBRSL1_NM_+|	61.3862	-3.12491	1.27114	2.45835	0.0139575	0.0909764	0	1.28649	0	6.99391	4.21229	9.15825	71.5247	92.6273	101.617	165.231	129.739	154.244	1.45219	4.53335	-3.98454	-0.757229	-3.22731	FBRSL1	chr12:133131082:+	chr12_132554493_+
chr12:132419845-132419900:mpeak_21598|chr12_132413744_132428083_PUS1_NM_+|	67.599	-2.95554	1.43135	2.06486	0.0389367	0.18535	0	0	0	0.874238	3.36983	7.71221	36.4636	91.3408	117.662	141.627	176.916	235.222	#DIV/0!	2.15909	-Inf	-1.17375	-Inf	PUS1	chr12:132419901:+	chr12_131935350_+
chr12:13137149-13137200:mpeak_17302|chr12_13128413_13153243_HEBP1_NM_-|	141.302	-1.79172	0.868997	2.06183	0.039224	0.186258	0	6.43245	0	0.874238	8.42459	5.30214	311.343	356.358	351.649	162.608	270.429	222.208	1.89311	2.22832	-1.18262	0.637541	-1.82016	HEBP1	chr12:13137149:-	chr12_12984216_-
chr12:125608770-125608831:mpeak_21545|chr12_125549924_125626637_AACS_NM_+|	106.48	-2.24924	0.886595	2.53695	0.0111824	0.0788377	2.80489	0	2.67413	6.99391	5.05475	4.82013	208.964	303.612	248.694	153.866	210.615	129.661	1.07958	3.41375	-1.62237	0.623483	-2.24585	AACS	chr12:125608830:+	-
chr12:102120274-102120331:mpeak_20233|chr12_102091416_102122678_CHPT1_NM_+|	275.001	-2.50783	0.953837	2.6292	0.00855862	0.0654005	2.80489	2.57298	0	8.74238	4.21229	2.41006	481.039	882.532	865.082	264.894	347.093	438.632	0.361959	1.46245	-1.51452	1.08493	-2.59945	CHPT1	chr12:102120327:+	chr12_101726565_+
chr11:85428276-85428335:mpeak_15690|chr11_85406383_85522202_SYTL2_NM_-|	317.776	-3.13968	1.2876	2.4384	0.0147524	0.0948154	0	0	0	0.874238	5.05475	8.19422	426.343	315.19	379.727	856.754	1037.91	783.271	#DIV/0!	0.527392	-Inf	-1.256	-Inf	SYTL2	chr11:85428284:-	-
chr11:85427965-85428152:mpeak_15689|chr11_85406383_85522202_SYTL2_NM_-|	317.616	-2.85211	1.27485	2.23721	0.0252729	0.136064	0	0	0	4.37119	2.52738	5.30214	426.343	315.19	379.727	856.754	1037.91	783.271	#DIV/0!	0.455602	-Inf	-1.256	-Inf	SYTL2	chr11:85427935:-	chr11_85716897_-
chr11:47247644-47247704:mpeak_14062|chr11_47236492_47260350_DDB2_NM_+|	121.478	-1.19755	0.602714	1.98693	0.0469301	0.208458	0	7.71894	8.0224	6.11967	12.6369	8.19422	266.465	272.736	279.447	197.578	232.519	166.294	2.88427	4.51898	-0.775768	0.456984	-1.23275	DDB2	chr11:47247700:+	chr11_47226146_+
chr11:47244650-47244723:mpeak_14061|chr11_47236492_47260350_DDB2_NM_+|	120.027	-2.80143	0.956535	2.92873	0.00340351	0.0336353	0	2.57298	1.33707	5.24543	11.7944	4.33812	266.465	272.736	279.447	197.578	232.519	166.294	0.716434	3.58456	-2.45087	0.456984	-2.90785	DDB2	chr11:47244704:+	chr11_47223170_+
chr11:2975102-2975168:mpeak_13077|chr11_2966876_3013607_NAP1L4_NM_-|	242.811	-1.71965	0.783636	2.19445	0.0282027	0.147993	1.40245	2.57298	2.67413	7.86815	9.26704	4.33812	429.148	607.223	465.299	435.371	504.633	443.934	0.442811	1.55161	-1.69121	0.11779	-1.809	NAP1L4	chr11:2975109:-	chr11_2953880_-
chr11:134106796-134106931:mpeak_16737|chr11_134094498_134115337_VPS26B_NM_+|	66.2541	-3.02465	1.30055	2.32567	0.0200364	0.116413	1.40245	0	0	6.99391	2.52738	6.26617	123.415	119.644	84.2352	140.752	191.238	118.575	1.28549	3.50392	-3.49276	-0.46115	-3.03161	VPS26B	chr11:134106849:+;chr11:134106904:+	chr11_134236951_+;chr11_134237004_+
chr10:99187129-99187199:mpeak_11714|chr10_99186026_99192111_PGAM1_NM_+|	653.367	-2.80597	1.19042	2.35713	0.0184167	0.110487	0	0	2.67413	0	0.842459	6.74818	1733.42	1793.37	1679.36	748.348	1041.28	834.364	0.154095	0.433918	-1.50515	0.988453	-2.4936	PGAM1	chr10:99187200:+	chr10_97427442_+
chr10:118660605-118660751:mpeak_12403|chr10_118646077_118886097_SHTN1_NM_-|	72.1737	-4.314	1.31999	3.26821	0.00108229	0.0156328	0	0	0	4.37119	0	5.30214	194.94	163.384	141.729	94.4177	122.156	139.784	#DIV/0!	4.07175	-Inf	0.488754	-Inf	SHTN1	chr10:118660665:-	-
chr10:118659243-118659293:mpeak_12401|chr10_118646077_118886097_SHTN1_NM_-|	72.4679	-2.66096	1.32388	2.00998	0.0444334	0.202083	1.40245	1.28649	0	0.874238	0	9.64026	194.94	163.384	141.729	94.4177	122.156	139.784	0.806595	4.42582	-1.96727	0.488754	-2.45603	SHTN1	chr10:118659238:-	chr10_116899732_-
chr10:102039799-102039942:mpeak_11843|chr10_102035250_102046469_BLOC1S2_NM_-|	675.172	-1.79153	0.741979	2.41453	0.0157557	0.0991125	4.20734	2.57298	1.33707	6.11967	12.6369	3.8561	1424.88	1406.13	1750.22	1040.34	1208.09	1241.67	0.177188	0.647909	-1.47804	0.392472	-1.87052	BLOC1S2	chr10:102039798:-;chr10:102039829:-	chr10_100280042_-
chr1:8031267-8031322:mpeak_344|chr1_8021713_8044953_PARK7_NM_+|	717.716	-1.30214	0.42686	3.0505	0.00228458	0.0252553	9.81712	16.7244	18.7189	11.3651	21.0615	17.3525	2022.33	2171.6	1692.73	835.772	954.506	840.631	0.768866	1.89209	-0.137288	1.16189	-1.29917	PARK7	chr1:8031320:+	chr1_7971258_+
chr1:36850012-36850070:mpeak_1803|chr1_36807574_36851528_STK40_NM_-|	53.9526	-4.03499	1.31156	3.07647	0.00209467	0.0239543	0	0	0	6.11967	4.21229	3.37409	72.9271	110.638	120.336	96.1662	94.3554	139.302	#DIV/0!	4.15557	-Inf	-0.11809	-Inf	STK40	chr1:36850016:-	chr1_36384414_-
chr1:2323870-2323946:mpeak_182|chr1_2323213_2334473_RER1_NM_+|	271.952	-5.21029	1.25463	4.15284	3.28374e-05	0.00128118	0	0	0	6.11967	8.42459	4.33812	645.125	716.575	594.995	385.539	494.523	407.783	#DIV/0!	1.4662	-Inf	0.603459	-Inf	RER1	chr1:2323939:+	chr1_2392513_+
chr1:225706748-225706806:mpeak_8310|chr1_225685514_225840845_ENAH_NM_-|	268.094	-1.30961	0.666336	1.96538	0.0493697	0.215547	9.81712	1.28649	0	11.3651	4.21229	5.30214	617.076	625.234	574.939	433.622	463.352	470.927	0.916518	1.52639	-0.911061	0.409792	-1.32085	ENAH	chr1:225706746:-	chr1_225519046_-
chr1:207940614-207940918:mpeak_7814|chr1_207925382_207966863_CD46_NM_+|	67.6575	-4.35034	1.30811	3.32566	0.000882085	0.0138511	0	0	0	1.74848	4.21229	4.33812	113.598	164.671	189.863	101.412	128.896	103.151	#DIV/0!	3.08851	-Inf	0.489409	-Inf	CD46	chr1:207940734:+;chr1:207940828:+;chr1:207940863:+	chr1_207767319_+;chr1_207767388_+;chr1_207767496_+;chr1_207767570_+
chr1:205717926-205718082:mpeak_7722|chr1_205687607_205719372_NUCKS1_NM_-|	13155.5	-1.20734	0.515128	2.34376	0.0190906	0.112735	14.0245	15.4379	2.67413	13.9878	16.0067	7.71221	40769.1	33159.3	32139.1	17246.1	16121.3	18361.8	0.0302981	0.0728926	-0.230611	1.03593	-1.26654	NUCKS1	chr1:205717932:-;chr1:205717989:-	chr1_205748863_-
chr1:204177693-204177853:mpeak_7572|chr1_204167624_204183220_GOLT1A_NM_-|	112.812	-2.25701	1.10989	2.03354	0.0419979	0.194877	0	3.85947	0	7.86815	0.842459	5.30214	352.014	267.59	148.414	154.74	260.32	152.798	1.50757	2.46765	-1.86026	0.43561	-2.29587	GOLT1A	chr1:204177693:-;chr1:204177734:-	chr1_204208566_-;chr1_204208607_-
chr1:193059621-193059779:mpeak_7186|chr1_193028551_193060780_TROVE2_NM_+|	58.2108	-2.4549	1.12824	2.17587	0.0295647	0.152945	1.40245	1.28649	0	3.49695	7.58213	6.26617	109.391	99.0598	100.28	103.16	149.958	116.647	1.30645	4.69089	-2.68943	-0.26026	-2.42917	TROVE2	chr1:193059678:+;chr1:193059779:+	chr1_193090650_+
chr1:173835344-173835405:mpeak_6627|chr1_173833213_173837125_GAS5_NR_-|	308.104	-3.97718	1.33971	2.9687	0.00299064	0.0308017	0	0	0	2.62272	4.21229	3.37409	422.136	788.619	754.106	391.659	730.412	600.106	#DIV/0!	0.592802	-Inf	0.190194	-Inf	GAS5	chr1:173835345:-	chr1_173866198_-
chr1:153939505-153939661:mpeak_5652|chr1_153933230_153940660_SLC39A1_NM_-|	1153.93	-4.39332	1.25582	3.49837	0.000468106	0.0088206	1.40245	0	0	6.11967	6.73967	7.23019	2731.96	3250.96	2291.73	1584.12	2128.05	1838.88	0.050846	0.361905	-3.84043	0.575939	-4.41637	SLC39A1	chr1:153939508:-;chr1:153939613:-	chr1_153967034_-;chr1_153967068_-;chr1_153967137_-
chr1:151957535-151957688:mpeak_5562|chr1_151955800_151966714_S100A10_NM_-|	1684.61	-2.43719	0.937988	2.59832	0.00936809	0.0695565	0	6.43245	0	0	5.05475	10.6043	4255.02	4861.65	4558.06	1949.55	2582.14	1986.86	0.141117	0.360334	-1.28355	1.06889	-2.35244	S100A10	chr1:151957540:-	chr1_151985013_-;chr1_151985063_-
chr1:117208557-117208611:mpeak_4398|chr1_117120184_117210377_IGSF3_NM_-|	611.978	-2.78101	0.730122	3.80896	0.000139551	0.00367306	1.40245	3.85947	1.33707	11.3651	19.3765	12.0503	1354.76	1340.52	1116.45	1140.88	1155.01	1186.72	0.173123	1.22873	-2.69702	0.13028	-2.8273	IGSF3	chr1:117208558:-	chr1_116665937_-
chr1:112247445-112247498:mpeak_4011|chr1_112162404_112255052_RAP1A_NM_+|	168.735	-4.45674	1.37966	3.23031	0.00123657	0.0171731	0	0	0	1.74848	0	6.26617	290.306	550.618	439.895	190.584	285.593	259.805	#DIV/0!	1.63346	-Inf	0.799323	-Inf	RAP1A	chr1:112247499:+	chr1_111704878_+
chr1:109762701-109762765:mpeak_3830|chr1_109756514_109780352_SARS_NM_+|	188.451	-4.91881	1.26697	3.88235	0.000103451	0.00295167	0	0	0	6.99391	3.36983	6.74818	510.49	412.963	335.604	321.72	358.887	304.632	#DIV/0!	1.73683	-Inf	0.353798	-Inf	SARS	chr1:109762754:+	chr1_109220129_+
chr1:108741996-108742046:mpeak_3701|chr1_108679459_108742980_SLC25A24_NM_-|	354.747	-4.8037	1.31864	3.64293	0.000269553	0.00602389	0	0	0	3.49695	3.36983	5.78416	555.368	1112.81	918.565	418.76	644.481	594.322	#DIV/0!	0.763225	-Inf	0.642075	-Inf	SLC25A24	chr1:108741994:-	chr1_108199373_-
chr9:101986720-101986840:mpeak_82560|chr9_101984569_101992618_SEC61B_NM_+|	492.425	-4.10465	0.859261	4.77696	1.77965e-06	0.00011996	4.20734	2.57298	0	20.1075	28.6436	12.0503	799.394	1770.21	1280.91	527.166	795.281	668.552	0.264133	3.05381	-3.16468	0.951559	-4.11624	SEC61B	-	chr9_99224575_+
chr9:33471700-33471770:mpeak_81310|chr9_33462811_33473941_NOL6_NM_-|	81.3739	-3.68282	1.27755	2.88272	0.00394263	0.0376014	0	1.28649	0	6.11967	5.05475	2.89208	185.123	185.255	191.201	110.154	132.266	157.136	0.687255	3.52053	-3.45075	0.491088	-3.94184	NOL6	-	chr9_33471702_-
chr9:128052415-128052541:mpeak_83402|chr9_128024072_128124884_GAPVD1_NM_+|	82.7109	-3.75618	1.3407	2.80165	0.00508418	0.0451378	0	0	0	6.99391	2.52738	4.33812	185.123	115.784	112.314	204.572	117.944	242.935	#DIV/0!	2.45104	-Inf	-0.452489	-Inf	GAPVD1	-	chr9_125290186_+;chr9_125290290_+
chr8:144667045-144667104:mpeak_80595|chr8_144662000_144679845_EEF1D_NM_-|	2436.84	-3.12309	0.757272	4.12413	3.72146e-05	0.00141535	7.01223	0	0	10.4909	9.26704	8.19422	7678.39	6568.82	5626.38	2918.21	3452.4	2962.93	0.105852	0.299481	-1.99501	1.09036	-3.08537	EEF1D	-	chr8_143584883_-
chr8:124346216-124346266:mpeak_80113|chr8_124333415_124408705_ATAD2_NM_-|	116.595	-3.4983	1.35499	2.5818	0.00982877	0.0719012	0	0	0	0	5.05475	5.30214	130.427	176.249	290.143	250.906	285.593	255.467	#DIV/0!	1.96162	-Inf	-0.408144	-Inf	ATAD2	-	chr8_123333971_-
chr8:109228838-109228889:mpeak_79827|chr8_109214152_109260959_EIF3E_NM_-|	332.945	-3.46119	1.34115	2.58077	0.00985803	0.071948	0	1.28649	0	7.86815	12.6369	1.92805	398.294	707.57	601.68	657.427	874.472	732.178	0.226025	0.990827	-4.12411	-0.407	-3.71711	EIF3E	-	chr8_108216609_-
chr8:104069242-104069336:mpeak_79715|chr8_104033247_104080879_ATP6V1C1_NM_+|	96.7238	-4.56047	1.2771	3.57097	0.000355661	0.00734712	0	0	0	4.37119	4.21229	4.33812	180.915	250.866	227.301	145.124	187.868	155.69	#DIV/0!	2.64417	-Inf	0.431563	-Inf	ATP6V1C1	-	chr8_103057091_+
chr8:101944184-101944259:mpeak_79578|chr8_101932980_101965623_YWHAZ_NM_-|	1465.77	-4.69134	1.31525	3.56688	0.000361253	0.0073591	0	0	0	0	0.842459	7.71221	3748.74	3826.02	3711.7	2046.59	2163.43	2084.22	#DIV/0!	0.203869	-Inf	0.842486	-Inf	YWHAZ	-	chr8_100931956_-
chr7:80408144-80408291:mpeak_75174|chr7_80374623_80548667_SEMA3C_NM_-|	485.983	-4.46255	1.33652	3.33893	0.000841031	0.0132783	0	0	0	1.74848	0	9.15825	1084.09	1061.35	1108.43	820.91	850.041	896.062	#DIV/0!	0.63732	-Inf	0.342068	-Inf	SEMA3C	-	chr7_80778810_-
chr7:2411788-2411894:mpeak_73231|chr7_2394473_2419838_EIF3B_NM_+|	922.964	-2.00082	0.869357	2.3015	0.0213635	0.120893	0	5.14596	0	3.49695	9.26704	3.37409	2185.01	2142.01	2112.57	1439.87	1868.57	1306.26	0.239734	0.349711	-1.64896	0.48073	-2.12969	EIF3B	-	chr7_2372234_+
chr7:105911679-105911841:mpeak_75994|chr7_105891639_105925638_NAMPT_NM_-|	89.7068	-3.74079	1.38143	2.70792	0.0067707	0.0555801	0	0	0	0.874238	9.26704	1.44604	119.208	182.682	205.908	162.608	222.409	172.079	#DIV/0!	2.07995	-Inf	-0.133672	-Inf	NAMPT	-	chr7_106271339_-
chr6:7570748-7570799:mpeak_68685|chr6_7541869_7582874_DSP_NM_+|	945.407	-3.20697	1.27374	2.51776	0.0118105	0.0816008	0	0	1.33707	1.74848	1.68492	6.74818	1825.98	2064.82	2111.23	1636.57	1709.35	1985.41	0.0668307	0.190976	-2.92882	0.170954	-3.09977	DSP	-	chr6_7570563_+
chr6:33677855-33677934:mpeak_69887|chr6_33665527_33679528_UQCC2_NM_-|	145.936	-5.69171	1.27975	4.44752	8.6869e-06	0.000423665	0	0	0	2.62272	6.73967	9.15825	399.697	429.688	314.211	186.213	237.573	165.33	#DIV/0!	3.1438	-Inf	0.956952	-Inf	UQCC2	-	chr6_33710106_-
chr6:152172965-152173131:mpeak_72647|chr6_152011630_152419866_ESR1_NM_+|	413.67	-2.68163	1.25831	2.13113	0.0330787	0.166316	0	0	0	6.11967	5.89721	6.74818	410.916	263.731	315.548	1382.17	1299.91	1273	#DIV/0!	0.474455	-Inf	-1.99792	-Inf	ESR1	-	chr6_151851977_+
chr6:136590274-136590488:mpeak_72099|chr6_136582253_136610989_BCLAF1_NM_-|	211.103	-2.65513	0.769147	3.45205	0.000556345	0.0100872	0	6.43245	0	13.1136	5.89721	6.74818	502.075	558.337	510.759	277.134	310.025	342.711	1.22821	2.77017	-2.00163	0.756741	-2.75837	BCLAF1	-	chr6_136269238_-
chr5:32592668-32593098:mpeak_64225|chr5_32585604_32601110_SUB1_NM_+|	795.639	-2.45567	0.781694	3.14147	0.001681	0.0209712	1.40245	5.14596	0	7.86815	8.42459	5.78416	1677.32	2304.1	2026.99	963.411	1324.34	1222.87	0.163481	0.62886	-1.75332	0.775259	-2.52858	SUB1	-	chr5_32592871_+
chr5:179256482-179256757:mpeak_68366|chr5_179233387_179263435_SQSTM1_NM_+|	766.879	-2.97673	0.983756	3.02588	0.00247907	0.0266935	2.80489	1.28649	0	6.99391	4.21229	7.71221	1552.51	2470.06	1672.67	927.567	1512.21	1044.52	0.107758	0.542961	-2.20913	0.708887	-2.91802	SQSTM1	-	chr5_179829589_+
chr5:179248894-179249009:mpeak_68362|chr5_179233387_179263435_SQSTM1_NM_+|	776.592	-2.85049	0.640308	4.45174	8.51773e-06	0.000423665	11.2196	3.85947	10.6965	27.1014	60.657	26.0287	1552.51	2470.06	1672.67	927.567	1512.21	1044.52	0.452581	3.26571	-2.14226	0.708887	-2.85115	SQSTM1	-	chr5_179822003_+
chr5:177633300-177633365:mpeak_68253|chr5_177631507_177637553_HNRNPAB_NM_+mpeak_68253|chr5_177631507_177637553_HNRNPAB_NM_+||	329.969	-3.29256	1.31043	2.51258	0.0119853	0.0822689	1.40245	0	0	5.24543	0.842459	4.82013	503.478	908.262	775.499	552.519	673.967	533.588	0.192358	0.619748	-2.95937	0.313475	-3.27285	HNRNPAB	-	chr5_178206366_+
chr5:157217637-157217687:mpeak_67735|chr5_157215000_157286183_CLINT1_NM_-|	109.924	-3.49091	1.30485	2.67534	0.00746539	0.0594007	0	0	0	1.74848	0.842459	5.78416	182.318	183.968	236.661	218.56	224.094	265.107	#DIV/0!	1.18332	-Inf	-0.231231	-Inf	CLINT1	-	chr5_157790629_-
chr5:148914695-148914893:mpeak_67505|chr5_148876423_148931115_CSNK1A1_NM_-|	116.66	-4.52098	1.30034	3.47678	0.000507477	0.00937081	0	0	0	5.24543	5.89721	9.15825	127.623	272.736	215.268	226.428	289.806	247.755	#DIV/0!	2.65723	-Inf	-0.311496	-Inf	CSNK1A1	-	chr5_149535142_-
chr5:138218071-138218123:mpeak_67031|chr5_138089084_138269490_CTNNA1_NM_+|	304.442	-4.05596	1.27405	3.18351	0.00145499	0.0191117	0	0	1.33707	4.37119	2.52738	4.33812	715.247	838.792	906.531	329.588	425.442	425.135	0.163019	0.952128	-3.07107	1.06	-4.13108	CTNNA1	-	chr5_138882432_+
chr5:10385390-10385537:mpeak_63980|chr5_10353750_10433705_MARCH6_NM_+|	528.295	-4.09179	1.29764	3.15326	0.0016146	0.0205023	0	0	0	0	5.89721	4.82013	934.028	1280.06	1117.79	795.557	1118.79	1082.6	#DIV/0!	0.536414	-Inf	0.152842	-Inf	MARCH6	-	chr5_10385356_+
chr4:100849439-100849638:mpeak_62039|chr4_100822309_100867883_DNAJB14_NM_-|	213.712	-3.62199	1.29175	2.80394	0.00504817	0.0449563	0	1.28649	0	5.24543	4.21229	10.6043	270.672	403.958	480.007	392.533	519.797	476.229	0.334258	1.44481	-3.96295	-0.266149	-3.6968	DNAJB14	-	chr4_99928431_-
chr4:48854238-48854438:mpeak_61035|chr4_48833059_48862741_OCIAD1_NM_+|	768.371	-1.48308	0.677646	2.18857	0.0286281	0.149374	9.81712	7.71894	0	12.2393	9.26704	13.4964	1085.49	2395.45	1833.12	1069.19	1372.37	1412.3	0.494991	0.908252	-0.997143	0.463511	-1.46065	OCIAD1	-	chr4_48852261_+;chr4_48852452_+
chr4:110741507-110741631:mpeak_62364|chr4_110736665_110745573_GAR1_NM_+|	120.871	-4.0879	1.37765	2.96731	0.00300419	0.0308855	0	0	0	11.3651	2.52738	1.44604	154.269	267.59	252.706	217.685	286.436	256.431	#DIV/0!	2.01676	-Inf	-0.173091	-Inf	GAR1	-	chr4_109820491_+
chr4:106848518-106848660:mpeak_62261|chr4_106816596_106890051_NPNT_NM_+|	231.69	-1.91827	0.903313	2.12359	0.0337046	0.168442	0	0	5.34827	3.49695	2.52738	5.30214	758.723	469.569	508.085	380.294	320.134	326.805	0.924039	1.10262	-1.08256	0.757317	-1.83987	NPNT	-	chr4_105927503_+
chr4:102062858-102062944:mpeak_62092|chr4_101947218_102268628_PPP3CA_NM_-|	6603.56	-4.16128	1.25952	3.30386	0.000953644	0.0143497	0	0	0	2.62272	5.05475	4.33812	12371	14304.5	14529.9	11651.8	12334.4	14039.1	#DIV/0!	0.0315988	-Inf	0.115869	-Inf	PPP3CA	-	chr4_101141700_-
chr4:101974594-101974645:mpeak_62081|chr4_101947218_102268628_PPP3CA_NM_-|	6603.56	-2.95038	1.27071	2.32183	0.0202421	0.117116	0	1.28649	0	6.11967	1.68492	2.89208	12371	14304.5	14529.9	11651.8	12334.4	14039.1	0.00936643	0.0281303	-3.05565	0.115869	-3.17152	PPP3CA	-	chr4_101053437_-
chr3:48967296-48967459:mpeak_55702|chr3_48956280_49020631_ARIH2_NM_+|	274.614	-4.48443	1.3019	3.44453	0.000572046	0.0102731	0	0	0	1.74848	0.842459	8.19422	587.625	643.245	628.421	412.64	524.852	487.797	#DIV/0!	0.756699	-Inf	0.383498	-Inf	ARIH2	-	chr3_48929938_+
chr3:41271451-41271502:mpeak_55367|chr3_41240941_41280624_CTNNB1_NM_+|	524.093	-4.68944	1.29879	3.61061	0.00030548	0.00667409	0	0	0	6.99391	3.36983	2.89208	928.419	1467.89	1389.21	677.535	985.677	827.134	#DIV/0!	0.532288	-Inf	0.604144	-Inf	CTNNB1	-	chr3_41230010_+
chr3:193384955-193385074:mpeak_59479|chr3_193310932_193412394_OPA1_NM_+|	90.2946	-4.48708	1.32295	3.39172	0.000694542	0.0116568	0	0	0	6.99391	0.842459	4.82013	144.452	236.714	223.29	118.022	171.019	177.381	#DIV/0!	2.71353	-Inf	0.374002	-Inf	OPA1	-	chr3_193667183_+
chr3:185643565-185643789:mpeak_59340|chr3_185635513_185655924_TRA2B_NM_-|	257.359	-4.56403	1.35315	3.37289	0.000743839	0.0122355	0	0	0	10.4909	0	6.26617	354.819	683.126	526.804	456.352	556.865	493.581	#DIV/0!	1.66814	-Inf	0.0544448	-Inf	TRA2B	-	chr3_185925951_-
chr3:150263481-150263539:mpeak_58327|chr3_150262285_150264428_SERP1_NM_-|	692.617	-2.63804	1.1752	2.24475	0.0247839	0.133711	0	2.57298	0	5.24543	8.42459	0.964026	1398.24	1869.27	1367.82	1031.6	1387.53	1239.74	0.166524	0.399961	-2.50782	0.341274	-2.84909	SERP1	-	chr3_150545771_-
chr3:12879090-12879327:mpeak_54583|chr3_12877722_12883081_RPL32_NM_-|	4421.98	-1.75386	0.542553	3.23261	0.00122664	0.0171339	0	12.8649	6.68533	12.2393	5.05475	11.5683	12594	12239.7	12049.6	4877.38	5764.1	5490.61	0.0795086	0.178913	-0.562005	1.19303	-1.75504	RPL32	-	chr3_12837660_-
chr3:12637299-12637442:mpeak_54568|chr3_12626156_12705700_RAF1_NM_-|	103.5	-4.80973	1.34173	3.58473	0.000337421	0.00710039	0	0	0	6.11967	6.73967	4.82013	113.598	321.623	231.313	144.249	210.615	202.927	#DIV/0!	3.16955	-Inf	0.256951	-Inf	RAF1	-	chr3_12595800_-
chr21:44266803-44266857:mpeak_52501|chr21_44263391_44299699_WDR4_NM_-|	169.22	-2.50975	0.992583	2.5285	0.0114551	0.0801151	0	3.85947	0	3.49695	7.58213	8.19422	337.989	470.856	263.402	254.403	372.367	308.488	1.07983	2.06075	-2.32013	0.1972	-2.51733	WDR4	-	chr21_42846700_-
chr20:52826554-52826613:mpeak_51351|chr20_52824501_52835557_PFDN4_NM_+|	1351.24	-4.28862	1.32827	3.22873	0.00124341	0.0172393	0	0	0	4.37119	1.68492	3.8561	2033.55	3819.59	3683.62	1717	2632.68	2318.48	#DIV/0!	0.14865	-Inf	0.516208	-Inf	PFDN4	-	chr20_54210067_+
chr20:49566026-49566161:mpeak_51213|chr20_49551773_49575060_DPM1_NM_-|	202.787	-4.15007	1.34294	3.09028	0.00199968	0.0233842	0	0	0	0	3.36983	5.78416	312.745	575.061	471.985	291.996	418.702	353.798	#DIV/0!	1.28991	-Inf	0.353216	-Inf	DPM1	-	chr20_50949499_-
chr20:2450467-2450529:mpeak_49646|chr20_2442585_2451499_SNRPB_NM_-mpeak_49646|chr20_2442585_2451499_SNRPB_NM_-||	902.932	-4.93063	1.29186	3.81668	0.000135258	0.00359843	0	0	0	0.874238	5.05475	4.33812	2119.09	2760.81	2452.18	915.328	1378.26	1199.25	#DIV/0!	0.293947	-Inf	1.06982	-Inf	SNRPB	-	chr20_2469831_-
chr20:17939949-17940080:mpeak_49990|chr20_17923051_17949634_SNX5_NM_-|	657.217	-3.40316	1.11145	3.06192	0.0021992	0.0245736	0	0	2.67413	7.86815	5.89721	8.19422	1267.81	1484.61	1649.94	945.052	1417.02	1097.54	0.18223	0.634741	-3.03771	0.347668	-3.38537	SNX5	-	chr20_17959276_-
chr2:96932347-96932455:mpeak_45653|chr2_96931883_96936848_CIAO1_NM_+|	257.227	-5.02379	1.24999	4.01907	5.84275e-05	0.00199351	0	0	0	5.24543	8.42459	9.64026	572.198	522.315	435.884	510.555	577.084	445.38	#DIV/0!	1.52055	-Inf	-0.00247037	-Inf	CIAO1	-	chr2_96266717_+
chr2:85217899-85217957:mpeak_45328|chr2_85198230_85280270_KCMF1_NM_+|	247.444	-3.58208	1.25825	2.84687	0.00441508	0.0409915	0	0	1.33707	3.49695	3.36983	7.71221	523.112	512.023	501.4	427.503	542.543	446.826	0.261055	1.02896	-3.44675	0.116972	-3.56372	KCMF1	-	chr2_84990830_+
chr2:62104043-62104192:mpeak_44668|chr2_62095841_62115806_CCT4_NM_-|	710.01	-1.94814	0.801129	2.43174	0.0150266	0.0958351	2.80489	1.28649	2.67413	10.4909	1.68492	7.71221	1350.55	1833.25	1585.76	1070.07	1440.6	1213.23	0.141848	0.534064	-1.55563	0.357044	-1.91267	CCT4	-	chr2_61876929_-;chr2_61876994_-
chr2:54196743-54196894:mpeak_44421|chr2_54092710_54197977_PSME4_NM_-|	297.371	-3.95078	1.2778	3.09187	0.00198898	0.0232919	0	0	1.33707	6.99391	5.05475	5.30214	617.076	739.732	649.814	401.275	684.919	456.948	0.199898	1.12438	-3.69786	0.378898	-4.07676	PSME4	-	chr2_53969713_-
chr2:44217433-44217554:mpeak_44185|chr2_44115795_44223144_LRPPRC_NM_-|	230.317	-3.4759	1.14549	3.03443	0.0024099	0.0263069	0	2.57298	0	6.11967	4.21229	12.0503	367.441	571.202	582.961	350.57	460.825	405.855	0.50729	1.83876	-3.12084	0.321968	-3.44281	LRPPRC	-	chr2_43990336_-
chr2:29147188-29147394:mpeak_43746|chr2_29117508_29169465_WDR43_NM_+|	201.313	-2.6714	1.30645	2.04478	0.0408763	0.191364	0	0	0	2.62272	9.26704	3.8561	124.818	192.974	247.357	620.709	604.885	609.264	#DIV/0!	0.858151	-Inf	-1.69897	-Inf	WDR43	-	chr2_28924390_+
chr2:27605034-27605105:mpeak_43643|chr2_27604672_27632550_PPM1G_NM_-|	681.755	-2.22781	0.83364	2.67239	0.00753126	0.05981	1.40245	1.28649	2.67413	8.74238	6.73967	4.33812	1408.05	1705.89	1555.01	1005.37	1214.83	1266.73	0.114867	0.568413	-1.88584	0.421141	-2.30698	PPM1G	-	chr2_27382187_-
chr2:216831074-216831134:mpeak_48714|chr2_216809720_216878346_MREG_NM_-|	87.974	-3.39536	1.29598	2.61992	0.00879495	0.0665926	0	0	1.33707	1.74848	5.05475	5.78416	148.659	200.693	205.908	124.142	184.498	177.863	0.7224	2.58732	-3.23484	0.190715	-3.42555	MREG	-	chr2_215966360_-
chr2:139264447-139264588:mpeak_46845|chr2_139259349_139326505_SPOPL_NM_+|	126.587	-3.12339	1.2776	2.44474	0.0144957	0.0934557	0	1.28649	0	3.49695	5.05475	5.78416	179.513	268.877	242.009	226.428	294.018	292.582	0.559021	1.76327	-3.47812	-0.235875	-3.24224	SPOPL	-	chr2_138506953_+
chr19:48250228-48250293:mpeak_41890|chr19_48248792_48260255_GLTSCR2_NM_+|	262.233	-2.14661	0.702362	3.05627	0.00224109	0.024874	5.60978	2.57298	0	12.2393	7.58213	14.9424	437.563	542.899	565.579	498.316	547.598	511.898	0.793908	2.23158	-2.08693	-0.0109422	-2.07599	GLTSCR2	-	chr19_47747025_+
chr19:42368345-42368439:mpeak_41517|chr19_42363987_42375418_RPS19_NM_+|	4542.39	-4.67767	0.790211	5.91952	3.22882e-09	6.37385e-07	1.40245	3.85947	0	19.2332	17.6916	19.7625	13773.4	12003	12691.4	4601.99	6042.96	5333.96	0.0205181	0.354764	-3.42937	1.26748	-4.69685	RPS19	-	chr19_41864326_+
chr19:39139284-39139368:mpeak_41292|chr19_39138266_39219913_ACTN4_NM_+|	1077.89	-1.66446	0.787272	2.11422	0.0344969	0.171404	7.01223	2.57298	1.33707	9.61662	1.68492	5.78416	1754.46	3317.86	3536.54	1274.64	1390.06	1633.06	0.126872	0.397549	-0.645516	1.00224	-1.64775	ACTN4	-	chr19_38648694_+
chr19:36721290-36721604:mpeak_41109|chr19_36705503_36726560_ZNF146_NM_+|	144.324	-2.56532	1.24632	2.05832	0.0395591	0.187527	1.40245	0	0	6.99391	10.1095	8.67623	158.476	136.368	128.358	478.208	368.997	434.294	0.994166	2.01168	-4.20022	-1.59841	-2.6018	ZNF146	-	chr19_36230535_+
chr17:59220193-59220253:mpeak_36518|chr17_58755171_59469337_BCAS3_NM_+|	643.847	-1.59977	0.732997	2.1825	0.0290723	0.150916	4.20734	1.28649	2.67413	5.24543	0.842459	6.26617	1642.26	1765.06	1568.38	848.011	930.917	951.012	0.164157	0.45254	-0.596937	0.866033	-1.46297	BCAS3	-	chr17_61142882_+
chr17:58009702-58009839:mpeak_36367|chr17_57970406_58023911_RPS6KB1_NM_+|	1838.62	-2.56895	1.11832	2.29716	0.0216098	0.121634	2.80489	0	0	0	5.05475	5.78416	4593.01	3881.34	4094.1	3262.66	3010.95	3207.8	0.0669508	0.171476	-1.9502	0.406634	-2.35684	RPS6KB1	-	chr17_59932391_+
chr17:38548461-38548587:mpeak_35197|chr17_38545899_38574202_TOP2A_NM_-|	137.754	-3.53157	1.383	2.55355	0.0106631	0.0760169	0	0	0	8.74238	0	2.41006	148.659	308.758	275.436	288.499	326.031	294.51	#DIV/0!	1.84026	-Inf	-0.310821	-Inf	TOP2A	-	chr17_40392221_-
chr17:35368836-35368889:mpeak_34964|chr17_35306174_35413900_AATF_NM_+|	66.6475	-3.9563	1.36692	2.89432	0.00379979	0.0365476	0	0	0	2.62272	0	8.19422	143.049	118.357	118.999	140.752	161.752	106.043	#DIV/0!	3.97149	-Inf	-0.102965	-Inf	AATF	-	chr17_37011584_+
chr17:26945707-26945856:mpeak_34557|chr17_26942264_26972177_KIAA0100_NM_-|	289.003	-4.70336	1.27151	3.69905	0.000216412	0.0051262	1.40245	0	0	13.1136	3.36983	5.30214	782.564	757.743	671.207	349.695	486.941	396.697	0.190247	1.7664	-3.95736	0.842472	-4.79983	KIAA0100	-	chr17_28618678_-
chr17:17732746-17732844:mpeak_34214|chr17_17716165_17740325_SREBF1_NM_-|	195.857	-2.73168	1.32615	2.05986	0.0394118	0.186935	0	0	0	2.62272	4.21229	3.8561	185.123	271.449	274.099	351.444	555.18	702.293	#DIV/0!	0.664491	-Inf	-1.1388	-Inf	SREBF1	-	chr17_17829481_-
chr16:4890463-4890652:mpeak_30206|chr16_4855311_4897303_GLYR1_NM_-|	123.495	-5.71719	1.24295	4.59968	4.23133e-06	0.000243327	0	0	0	7.86815	5.05475	12.0503	297.318	297.179	272.762	191.458	203.033	195.215	#DIV/0!	4.23486	-Inf	0.556468	-Inf	GLYR1	-	chr16_4840463_-
chr16:28966047-28966154:mpeak_31142|chr16_28962317_28975025_NFATC2IP_NM_+|	169.791	-3.23395	1.27876	2.52898	0.0114396	0.0801063	0	0	1.33707	6.99391	1.68492	3.37409	389.88	378.228	319.559	280.631	362.257	293.546	0.368789	1.28711	-3.17224	0.215988	-3.38823	NFATC2IP	-	chr16_28954778_+
chr16:12008042-12008105:mpeak_30434|chr16_11967028_12010519_GSPT1_NM_-|	585.394	-1.74564	0.667134	2.61663	0.00888037	0.0670557	2.80489	5.14596	2.67413	7.86815	4.21229	12.0503	1409.46	1336.66	1334.39	920.573	1165.12	823.76	0.260384	0.829392	-1.18341	0.488003	-1.67142	GSPT1	-	chr16_11914198_-
chr16:12004456-12004562:mpeak_30433|chr16_11967028_12010519_GSPT1_NM_-|	585.422	-1.68151	0.659494	2.5497	0.0107817	0.0765988	0	1.28649	9.35947	6.99391	9.26704	8.19422	1409.46	1336.66	1334.39	920.573	1165.12	823.76	0.391346	0.840542	-1.19983	0.488003	-1.68784	GSPT1	-	chr16_11910599_-
chr15:66796361-66796457:mpeak_28564|chr15_66791990_66797193_RPL4_NM_-|	896.59	-4.93001	1.25121	3.9402	8.14123e-05	0.00246346	1.40245	0	0	11.3651	5.89721	9.64026	2792.27	1963.18	1882.59	1410.15	1385	1297.58	0.0633822	0.657326	-4.26173	0.697695	-4.95942	RPL4	-	chr15_66504033_-;chr15_66504068_-
chr14:97021185-97021341:mpeak_26451|chr14_96968712_97031291_PAPOLA_NM_+|	476.235	-6.27984	1.27576	4.92243	8.54777e-07	6.56199e-05	0	0	0	8.74238	7.58213	8.19422	1652.08	1126.97	1210.05	755.342	449.873	495.991	#DIV/0!	1.44126	-Inf	1.2295	-Inf	PAPOLA	-	chr14_96554999_+
chr14:96987337-96987406:mpeak_26441|chr14_96968712_97031291_PAPOLA_NM_+|	477.031	-1.87944	0.713678	2.63346	0.008452	0.0647648	7.01223	1.28649	5.34827	8.74238	2.52738	9.15825	1652.08	1126.97	1210.05	755.342	449.873	495.991	0.342108	1.2008	-0.581966	1.2295	-1.81147	PAPOLA	-	chr14_96521018_+;chr14_96521069_+
chr14:96981773-96981826:mpeak_26439|chr14_96968712_97031291_PAPOLA_NM_+|	475.656	-2.4924	0.951262	2.6201	0.00879034	0.0665926	5.60978	0	0	4.37119	0.842459	6.74818	1652.08	1126.97	1210.05	755.342	449.873	495.991	0.421884	0.703138	-1.09242	1.2295	-2.32192	PAPOLA	-	chr14_96515486_+
chr14:69852074-69852126:mpeak_25457|chr14_69847357_69865021_ERH_NM_-|	4220.97	-2.12206	0.565568	3.75209	0.000175363	0.00439256	0	6.43245	9.35947	18.359	7.58213	14.4604	10633.3	10415.4	10942.6	5439.51	6972.19	6192.42	0.0740447	0.217164	-1.35522	0.782058	-2.13728	ERH	-	chr14_69385359_-
chr14:55530193-55530244:mpeak_24847|chr14_55518361_55531333_MAPK1IP1L_NM_+|	193.572	-3.49159	1.33431	2.61678	0.00887639	0.0670557	0	0	0	4.37119	0	10.6043	225.794	280.455	262.065	499.19	509.687	530.696	#DIV/0!	1.45905	-Inf	-1.00276	-Inf	MAPK1IP1L	-	chr14_55063493_+
chr14:21727280-21727656:mpeak_23737|chr14_21679465_21737638_HNRNPC_NM_-mpeak_23737|chr14_21679465_21737638_HNRNPC_NM_-||	1698.59	-3.53074	0.613386	5.75615	8.60532e-09	1.37205e-06	5.60978	1.28649	4.0112	20.9817	32.0134	22.6546	3587.45	4461.55	4596.84	2244.17	2710.19	2696.38	0.0862534	0.98879	-2.79402	0.724992	-3.51901	HNRNPC	-	chr14_21259339_-;chr14_21259378_-
chr14:103806059-103806149:mpeak_26717|chr14_103800338_103807299_EIF5_NM_+|	252.02	-3.77467	1.31307	2.8747	0.0040441	0.0383196	0	0	0	4.37119	5.89721	6.26617	211.769	504.304	414.491	606.721	702.61	567.811	#DIV/0!	0.880837	-Inf	-0.731496	-Inf	EIF5	-	chr14_103339798_+
chr12:69986222-69986378:mpeak_19489|chr12_69979207_69995074_CCT2_NM_+|	411.995	-5.86963	1.2873	4.55966	5.12376e-06	0.000279433	0	0	0	7.86815	5.89721	13.0143	695.613	1298.07	994.778	570.878	764.952	592.876	#DIV/0!	1.38848	-Inf	0.631769	-Inf	CCT2	-	chr12_69592483_+
chr12:69634277-69634330:mpeak_19446|chr12_69633316_69663291_CPSF6_NM_+|	131.146	-3.59452	1.30623	2.75183	0.00592631	0.050707	0	1.28649	0	0.874238	4.21229	6.26617	252.44	389.807	268.75	180.093	240.101	229.92	0.423654	1.74626	-3.14152	0.486754	-3.62828	CPSF6	-	chr12_69240512_+
chr12:21663080-21663211:mpeak_17466|chr12_21654698_21668602_GOLT1B_NM_+|	93.5817	-3.34526	1.48636	2.25064	0.0244084	0.132608	1.40245	0	0	0	0.842459	8.67623	127.623	297.179	212.594	123.268	183.656	167.741	0.660082	3.00803	-2.76282	0.425282	-3.1881	GOLT1B	-	chr12_21510200_+;chr12_21510221_+
chr12:124109730-124109871:mpeak_21442|chr12_124106467_124118323_EIF2B1_NM_-|	110.851	-3.48112	1.31874	2.63973	0.00829728	0.0642322	0	1.28649	0	0	4.21229	5.30214	190.733	308.758	299.503	152.992	179.444	187.985	0.483042	2.74233	-2.88668	0.618506	-3.50518	EIF2B1	-	chr12_123625185_-
chr11:63964732-63964826:mpeak_14595|chr11_63952743_63971525_STIP1_NM_+|	1541.37	-2.80557	1.14054	2.45987	0.0138989	0.0908521	1.40245	0	1.33707	9.61662	3.36983	2.89208	3846.91	3537.85	2944.22	2680.41	3246.84	2221.6	0.0397839	0.194856	-2.53509	0.342029	-2.87712	STIP1	-	chr11_64197294_+;chr11_64197333_+
chr10:76158213-76158292:mpeak_11007|chr10_75910942_76468078_ADK_NM_+|	102.151	-2.24478	0.89975	2.49489	0.0125997	0.0850683	0	1.28649	4.0112	4.37119	4.21229	4.82013	200.55	306.185	280.784	104.909	154.17	160.51	1.00906	3.19446	-1.33919	0.908337	-2.24752	ADK	-	chr10_74398497_+;chr10_74398534_+
chr10:70930713-70930773:mpeak_10740|chr10_70883907_70930911_VPS26A_NM_+|	92.7528	-3.25388	1.36225	2.38861	0.016912	0.103865	0	0	1.33707	0	4.21229	6.26617	133.232	235.428	231.313	121.519	174.389	205.338	0.668564	3.13573	-2.97028	0.259379	-3.22966	VPS26A	-	chr10_69171030_+
chr10:102115314-102115449:mpeak_11849|chr10_102106771_102120490_SCD_NM_+|	7396.1	-4.23556	1.27609	3.31916	0.000902901	0.0140066	0	0	0	4.37119	5.05475	5.30214	12824	17258.3	12802.4	11800.5	16240.1	17813.3	#DIV/0!	0.0321197	-Inf	-0.0965807	-Inf	SCD	-	chr10_100355682_+
chr1:78426480-78426614:mpeak_3027|chr1_78412261_78444889_FUBP1_NR_-mpeak_3027|chr1_78414459_78444889_FUBP1_NM_-||	530.893	-4.90026	1.33974	3.65762	0.000254566	0.00575098	0	0	0	5.24543	1.68492	9.15825	781.162	1681.44	1112.44	779.821	1133.11	866.659	#DIV/0!	0.578812	-Inf	0.363091	-Inf	FUBP1	-	chr1_77960824_-
chr1:46766886-46767031:mpeak_2342|chr1_46744756_46769038_LRRC41_NM_-|	56.4512	-4.31727	1.37828	3.13235	0.00173413	0.0214273	0	0	0	3.49695	6.73967	2.41006	56.0978	162.098	147.077	87.4238	106.992	105.079	#DIV/0!	4.22267	-Inf	0.286443	-Inf	LRRC41	-	chr1_46301217_-
chr1:207942937-207943077:mpeak_7815|chr1_207925382_207966863_CD46_NM_+|	68.2186	-3.89853	1.30483	2.98776	0.00281026	0.029308	0	1.28649	0	2.62272	9.26704	3.8561	113.598	164.671	189.863	101.412	128.896	103.151	0.82444	4.72198	-3.61346	0.489409	-4.10287	CD46	-	chr1_207769642_+
chr1:202731344-202731467:mpeak_7464|chr1_202698301_202777549_KDM5B_NM_-|	119.961	-2.77232	1.32515	2.09208	0.0364316	0.177158	0	0	0	2.62272	9.26704	1.92805	169.696	100.346	132.37	336.582	304.97	381.754	#DIV/0!	1.35031	-Inf	-1.34649	-Inf	KDM5B	-	chr1_202762223_-;chr1_202762302_-
chr1:200568550-200568615:mpeak_7315|chr1_200522895_200589862_KIF14_NM_-|	93.3929	-3.5392	1.29003	2.7435	0.00607878	0.0514277	0	0	0	3.49695	7.58213	1.44604	171.098	160.811	147.077	222.057	218.197	188.949	#DIV/0!	1.99063	-Inf	-0.393538	-Inf	KIF14	-	chr1_200599436_-
chr1:185276096-185276277:mpeak_7075|chr1_185267420_185286461_IVNS1ABP_NM_-|	190.783	-1.86684	0.904135	2.06478	0.0389434	0.18535	2.80489	1.28649	0	16.6105	13.4793	21.2086	145.854	162.098	179.167	573.5	626.789	546.603	1.25987	2.93655	-3.64826	-1.84244	-1.80581	IVNS1ABP	-	chr1_185307049_-
chr1:183599668-183599779:mpeak_7005|chr1_183596729_183605076_ARPC5_NM_-|	701.02	-1.64899	0.743481	2.21794	0.0265591	0.141336	5.60978	6.43245	1.33707	14.8621	3.36983	7.23019	2262.14	1435.72	1548.32	1383.92	789.384	953.904	0.255029	0.814212	-0.928348	0.746396	-1.67474	ARPC5	-	chr1_183630545_-;chr1_183630624_-
chr1:183446098-183446246:mpeak_6985|chr1_183441505_183520952_SMG7_NM_+|	237.656	-3.28244	1.27538	2.57369	0.0100619	0.0730501	0	1.28649	0	5.24543	5.05475	2.41006	431.953	595.645	512.097	448.484	458.297	391.395	0.250665	0.979085	-3.30448	0.246158	-3.55064	SMG7	-	chr1_183477008_+
chr1:172511892-172511961:mpeak_6576|chr1_172501488_172578955_SUCO_NM_+|	396.017	-3.76619	1.33352	2.82424	0.00473932	0.043275	0	0	0	0	7.58213	3.8561	577.807	954.576	676.556	652.182	1020.22	859.429	#DIV/0!	0.677666	-Inf	-0.196826	-Inf	SUCO	-	chr1_172542819_+
chr1:120484829-120484891:mpeak_4564|chr1_120459317_120612317_NOTCH2_NM_-|	76.7682	-3.96688	1.31784	3.01015	0.00261121	0.0277914	0	0	0	6.11967	5.05475	5.30214	67.3174	150.519	156.437	160.86	171.019	198.589	#DIV/0!	3.10604	-Inf	-0.503173	-Inf	NOTCH2	-	chr1_119942218_-
chr1:115290862-115291072:mpeak_4310|chr1_115260837_115300671_CSDE1_NM_-|	19212.5	-4.42876	0.967301	4.57848	4.68375e-06	0.000260624	1.40245	2.57298	0	7.86815	20.219	8.67623	67029.9	43103.9	52715.2	24174.4	18575.4	24909.9	0.00366176	0.0543357	-3.20909	1.26716	-4.47625	CSDE1	-	chr1_114748309_-
chr1:113196715-113196861:mpeak_4070|chr1_113162074_113212613_CAPZA1_NM_+|	1180.39	-4.49626	1.28139	3.5089	0.000449967	0.00865932	0	0	0	3.49695	0.842459	5.78416	2388.36	3005.24	3063.22	1647.07	1955.35	2095.31	#DIV/0!	0.177677	-Inf	0.569731	-Inf	CAPZA1	-	chr1_112654142_+
