# Supplementary material for: Compartment-specific and ELAVL1-coordinated regulation of intronic polyadenylation isoforms by doxorubicin
Source: HighWire-hosted journal article supplement (doi:10.1101/gr.276192.121), 2022-07-01
Supplement: Supplemental_Table_S6.xlsx.xlsx [file Supplemental_Table_S6.xlsx.xlsx]

## Sheet: description
Supplemental Table S6 : List of IPA:LE down-regulation events induced by doxorubicin in both the nucleus and cytosol of MCF-7 cells by 3’-seq analysis (‘Nuc IPA:LE down’ events; BED file).

## Sheet: bed file
chr1	893571	893701	mpeak_1	chr1_880180_894679_NOC2L_NM_-	chr1|NOC2L_NM	-
chr1	24842419	24842479	mpeak_2	chr1_24828840_24861582_RCAN3_NM_+	chr1|RCAN3_NM	+
chr1	41629726	41629877	mpeak_3	chr1_41493991_41707815_SCMH1_NM_-	chr1|SCMH1_NM	-
chr1	43406438	43406556	mpeak_4	chr1_43392912_43424847_SLC2A1_NM_-	chr1|SLC2A1_NM	-
chr1	109147178	109147232	mpeak_5	chr1_109102970_109177729_FAM102B_NM_+	chr1|FAM102B_NM	+
chr1	154219747	154219888	mpeak_6	chr1_154192647_154243356_UBAP2L_NM_+	chr1|UBAP2L_NM	+
chr1	155753475	155753530	mpeak_7	chr1_155720524_155829191_GON4L_NM_-	chr1|GON4L_NM	-
chr1	233362196	233362250	mpeak_8	chr1_233120223_233431459_PCNXL2_NM_-	chr1|PCNXL2_NM	-
chr1	235623274	235623333	mpeak_9	chr1_235613655_235667781_B3GALNT2_NM_-	chr1|B3GALNT2_NM	-
chr10	5920047	5920104	mpeak_10	chr10_5904654_5931860_ANKRD16_NM_-	chr10|ANKRD16_NM	-
chr10	35321259	35321314	mpeak_11	chr10_35299370_35379570_CUL2_NM_-	chr10|CUL2_NM	-
chr10	54214207	54214996	mpeak_12	chr10_54211277_54230293_LINC01468_NR_-	chr10|LINC01468_NR	-
chr10	75581742	75581832	mpeak_13	chr10_75574263_75634349_CAMK2G_NM_-	chr10|CAMK2G_NM	-
chr10	81916721	81916900	mpeak_14	chr10_81915668_81965433_ANXA11_NM_-	chr10|ANXA11_NM	-
chr10	94688077	94688132	mpeak_15	chr10_94594469_94817979_EXOC6_NM_+	chr10|EXOC6_NM	+
chr11	48044639	48044696	mpeak_16	chr11_48002109_48188755_PTPRJ_NM_+	chr11|PTPRJ_NM	+
chr11	62140527	62140622	mpeak_17	chr11_62104773_62159550_ASRGL1_NM_+	chr11|ASRGL1_NM	+
chr11	68578528	68578595	mpeak_18	chr11_68522319_68609399_CPT1A_NM_-	chr11|CPT1A_NM	-
chr11	68598210	68598275	mpeak_19	chr11_68522319_68609399_CPT1A_NM_-	chr11|CPT1A_NM	-
chr12	29710399	29710450	mpeak_20	chr12_29659919_29937692_TMTC1_NM_-	chr12|TMTC1_NM	-
chr12	49178949	49179065	mpeak_21	chr12_49162499_49182879_ADCY6_NM_-	chr12|ADCY6_NM	-
chr12	50412842	50412908	mpeak_22	chr12_50384126_50419307_RACGAP1_NM_-	chr12|RACGAP1_NM	-
chr12	52641796	52641856	mpeak_23	chr12_52626953_52642374_KRT7_NM_+	chr12|KRT7_NM	+
chr12	63074105	63074195	mpeak_24	chr12_63042416_63328665_PPM1H_NM_-	chr12|PPM1H_NM	-
chr12	105545889	105546017	mpeak_25	chr12_105501491_105560641_KIAA1033_NM_+	chr12|KIAA1033_NM	+
chr12	106752487	106752549	mpeak_26	chr12_106751435_106903197_POLR3B_NM_+	chr12|POLR3B_NM	+
chr12	112525976	112526031	mpeak_27	chr12_112467457_112546635_NAA25_NM_-	chr12|NAA25_NM	-
chr14	24661788	24662158	mpeak_28	chr14_24659014_24664942_TM9SF1_NM_-	chr14|TM9SF1_NM	-
chr14	51131504	51131565	mpeak_29	chr14_51102102_51135071_SAV1_NM_-	chr14|SAV1_NM	-
chr15	51009313	51009432	mpeak_30	chr15_51000071_51057910_SPPL2A_NM_-	chr15|SPPL2A_NM	-
chr16	2805927	2806313	mpeak_31	chr16_2802329_2820858_SRRM2_NM_+	chr16|SRRM2_NM	+
chr16	2806702	2807073	mpeak_32	chr16_2802329_2820858_SRRM2_NM_+	chr16|SRRM2_NM	+
chr16	81062170	81062396	mpeak_33	chr16_81040102_81066174_CENPN_NM_+	chr16|CENPN_NM	+
chr16	81092994	81093051	mpeak_34	chr16_81087699_81110872_C16orf46_NM_-	chr16|C16orf46_NM	-
chr17	7588565	7588633	mpeak_35	chr17_7573008_7590868_TP53_NM_-	chr17|TP53_NM	-
chr17	57078962	57079134	mpeak_36	chr17_57060282_57184266_TRIM37_NM_-	chr17|TRIM37_NM	-
chr17	57112350	57112490	mpeak_37	chr17_57060282_57184266_TRIM37_NM_-	chr17|TRIM37_NM	-
chr17	57126138	57126192	mpeak_38	chr17_57060282_57184266_TRIM37_NM_-	chr17|TRIM37_NM	-
chr17	57154035	57154085	mpeak_39	chr17_57060282_57184266_TRIM37_NM_-	chr17|TRIM37_NM	-
chr17	57170885	57171021	mpeak_40	chr17_57060282_57184266_TRIM37_NM_-	chr17|TRIM37_NM	-
chr17	73009254	73009399	mpeak_41	chr17_73008758_73017015_ICT1_NM_+	chr17|ICT1_NM	+
chr17	78235366	78235546	mpeak_42	chr17_78234659_78367144_RNF213_NM_+	chr17|RNF213_NM	+
chr19	4911777	4911939	mpeak_43	chr19_4903091_4960667_UHRF1_NM_+	chr19|UHRF1_NM	+
chr19	39335164	39335420	mpeak_44	chr19_39327420_39342979_HNRNPL_NM_-	chr19|HNRNPL_NM	-
chr19	46334382	46334499	mpeak_45	chr19_46318955_46366548_SYMPK_NM_-	chr19|SYMPK_NM	-
chr19	50489550	50489610	mpeak_46	chr19_50480041_50528805_VRK3_NM_-	chr19|VRK3_NM	-
chr19	50718853	50718921	mpeak_47	chr19_50706884_50812896_MYH14_NM_+	chr19|MYH14_NM	+
chr19	54681965	54682117	mpeak_48	chr19_54678125_54693733_MBOAT7_NM_-	chr19|MBOAT7_NM	-
chr2	9482287	9482344	mpeak_49	chr2_9346893_9543381_ASAP2_NM_+	chr2|ASAP2_NM	+
chr2	11731061	11731253	mpeak_50	chr2_11674241_11780416_GREB1_NM_+	chr2|GREB1_NM	+
chr2	54845419	54845586	mpeak_51	chr2_54683453_54895487_SPTBN1_NM_+	chr2|SPTBN1_NM	+
chr2	65301487	65301623	mpeak_52	chr2_65283494_65310772_CEP68_NM_+	chr2|CEP68_NM	+
chr2	65624565	65624676	mpeak_53	chr2_65541303_65659656_SPRED2_NM_-	chr2|SPRED2_NM	-
chr2	91830540	91830640	mpeak_54	chr2_91825059_91847975_LOC654342_NR_-	chr2|LOC654342_NR	-
chr2	136500664	136500986	mpeak_55	chr2_136499188_136540318_UBXN4_NM_+	chr2|UBXN4_NM	+
chr2	216865653	216865913	mpeak_56	chr2_216809720_216878346_MREG_NM_-	chr2|MREG_NM	-
chr2	242661109	242661223	mpeak_57	chr2_242641455_242664403_ING5_NM_+	chr2|ING5_NM	+
chr20	21317565	21317772	mpeak_58	chr20_21283941_21369910_XRN2_NM_+	chr20|XRN2_NM	+
chr20	44700752	44700930	mpeak_59	chr20_44691528_44718580_NCOA5_NM_-	chr20|NCOA5_NM	-
chr20	47549126	47549178	mpeak_60	chr20_47538274_47649559_ARFGEF2_NM_+	chr20|ARFGEF2_NM	+
chr20	47900106	47900232	mpeak_61	chr20_47894714_47905581_ZFAS1_NR_+	chr20|ZFAS1_NR	+
chr21	44400666	44400721	mpeak_62	chr21_44394619_44449999_PKNOX1_NM_+	chr21|PKNOX1_NM	+
chr21	47671419	47671532	mpeak_63	chr21_47655340_47705308_MCM3AP_NM_-	chr21|MCM3AP_NM	-
chr22	21198076	21198140	mpeak_64	chr22_21062386_21213100_PI4KA_NM_-	chr22|PI4KA_NM	-
chr22	40982323	40982383	mpeak_65	chr22_40807911_41032723_MKL1_NM_-	chr22|MKL1_NM	-
chr22	50641289	50641354	mpeak_66	chr22_50639407_50655633_SELO_NM_+	chr22|SELO_NM	+
chr22	50805958	50806014	mpeak_67	chr22_50781745_50882627_PPP6R2_NM_+	chr22|PPP6R2_NM	+
chr3	9803650	9803718	mpeak_68	chr3_9791627_9807492_OGG1_NM_+	chr3|OGG1_NM	+
chr3	12637301	12637442	mpeak_69	chr3_12626156_12705700_RAF1_NM_-	chr3|RAF1_NM	-
chr3	93781370	93781634	mpeak_70	chr3_93780450_93782067_DHFRL1_NM_-	chr3|DHFRL1_NM	-
chr3	129171117	129171212	mpeak_71	chr3_129158878_129239018_IFT122_NM_+	chr3|IFT122_NM	+
chr3	138011341	138011405	mpeak_72	chr3_137906089_138014700_ARMC8_NM_+	chr3|ARMC8_NM	+
chr3	142226008	142226157	mpeak_73	chr3_142168444_142297668_ATR_NM_-	chr3|ATR_NM	-
chr3	183701528	183701593	mpeak_74	chr3_183639189_183735727_ABCC5_NM_-	chr3|ABCC5_NM	-
chr3	185649362	185649480	mpeak_75	chr3_185635513_185655924_TRA2B_NM_-	chr3|TRA2B_NM	-
chr3	185655605	185655765	mpeak_76	chr3_185635513_185655924_TRA2B_NM_-	chr3|TRA2B_NM	-
chr3	196223084	196223173	mpeak_77	chr3_196199643_196230639_RNF168_NM_-	chr3|RNF168_NM	-
chr4	896636	896754	mpeak_78	chr4_843562_926178_GAK_NM_-	chr4|GAK_NM	-
chr4	75484514	75484693	mpeak_79	chr4_75480590_75490234_AREG_NM_+	chr4|AREG_NM	+
chr4	106393027	106393155	mpeak_80	chr4_106290910_106395227_PPA2_NM_-	chr4|PPA2_NM	-
chr4	143296197	143296265	mpeak_81	chr4_142950067_143767604_INPP4B_NM_-	chr4|INPP4B_NM	-
chr4	187536686	187536752	mpeak_82	chr4_187510374_187644987_FAT1_NM_-	chr4|FAT1_NM	-
chr4	187536936	187536989	mpeak_83	chr4_187510374_187644987_FAT1_NM_-	chr4|FAT1_NM	-
chr5	34951224	34951349	mpeak_84	chr5_34929697_34954657_DNAJC21_NM_+	chr5|DNAJC21_NM	+
chr5	112220975	112221069	mpeak_85	chr5_112196884_112227299_SRP19_NM_+	chr5|SRP19_NM	+
chr5	112221804	112221866	mpeak_86	chr5_112196884_112227299_SRP19_NM_+	chr5|SRP19_NM	+
chr5	137315367	137315418	mpeak_87	chr5_137276037_137368802_FAM13B_NM_-	chr5|FAM13B_NM	-
chr5	145529203	145529269	mpeak_88	chr5_145493874_145562294_LARS_NM_-	chr5|LARS_NM	-
chr5	179248894	179249351	mpeak_89	chr5_179233387_179263435_SQSTM1_NM_+	chr5|SQSTM1_NM	+
chr5	179308888	179309014	mpeak_90	chr5_179291128_179334856_TBC1D9B_NM_-	chr5|TBC1D9B_NM	-
chr6	107363121	107363192	mpeak_91	chr6_107349375_107372260_C6orf203_NM_+	chr6|C6orf203_NM	+
chr6	151763322	151763381	mpeak_92	chr6_151726402_151773316_RMND1_NM_-	chr6|RMND1_NM	-
chr6	151763504	151763555	mpeak_93	chr6_151726402_151773316_RMND1_NM_-	chr6|RMND1_NM	-
chr6	158987847	158987904	mpeak_94	chr6_158957467_159052841_TMEM181_NM_+	chr6|TMEM181_NM	+
chr7	43648456	43648513	mpeak_95	chr7_43622691_43664116_STK17A_NM_+	chr7|STK17A_NM	+
chr7	44647245	44647299	mpeak_96	chr7_44646120_44747477_OGDH_NM_+	chr7|OGDH_NM	+
chr7	55434405	55434508	mpeak_97	chr7_55433140_55498918_LANCL2_NM_+	chr7|LANCL2_NM	+
chr7	102979894	102979948	mpeak_98	chr7_102953090_102985320_DNAJC2_NM_-	chr7|DNAJC2_NM	-
chr7	138745071	138745294	mpeak_99	chr7_138732599_138794465_ZC3HAV1_NM_-	chr7|ZC3HAV1_NM	-
chr8	25268572	25268622	mpeak_100	chr8_25042286_25268709_DOCK5_NM_+	chr8|DOCK5_NM	+
chr8	62552114	62552167	mpeak_101	chr8_62416068_62627199_ASPH_NM_-	chr8|ASPH_NM	-
chr8	63936507	63936692	mpeak_102	chr8_63928012_63951610_GGH_NM_-	chr8|GGH_NM	-
chr8	92081407	92082059	mpeak_103	chr8_92075974_92082417_OTUD6B-AS1_NR_-	chr8|OTUD6B-AS1_NR	-
chr8	95523201	95523263	mpeak_104	chr8_95501088_95565746_KIAA1429_NM_-	chr8|KIAA1429_NM	-
chr8	104332604	104332774	mpeak_105	chr8_104310660_104343568_FZD6_NM_+	chr8|FZD6_NM	+
chr8	117759472	117759538	mpeak_106	chr8_117657342_117768062_EIF3H_NM_-	chr8|EIF3H_NM	-
chr8	126089041	126089172	mpeak_107	chr8_126036915_126104061_KIAA0196_NM_-	chr8|KIAA0196_NM	-
chr8	140829180	140829239	mpeak_108	chr8_140743471_141468678_TRAPPC9_NM_-	chr8|TRAPPC9_NM	-
chr9	125061823	125061941	mpeak_109	chr9_125026881_125084818_MRRF_NM_+	chr9|MRRF_NM	+
chr9	132259215	132259318	mpeak_110	chr9_132250938_132275697_LINC00963_NR_+	chr9|LINC00963_NR	+
chr9	132260266	132260402	mpeak_111	chr9_132250938_132275697_LINC00963_NR_+	chr9|LINC00963_NR	+
chr9	132267252	132267404	mpeak_112	chr9_132250938_132275697_LINC00963_NR_+	chr9|LINC00963_NR	+
chr9	132568348	132568520	mpeak_113	chr9_132565431_132571620_TOR1B_NM_+	chr9|TOR1B_NM	+
chr9	135263517	135263581	mpeak_114	chr9_135251555_135282238_TTF1_NM_-	chr9|TTF1_NM	-
chrX	76929349	76929503	mpeak_115	chrX_76764107_77041755_ATRX_NM_-	chrX|ATRX_NM	-
