# Supplementary material for: Compartment-specific and ELAVL1-coordinated regulation of intronic polyadenylation isoforms by doxorubicin
Source: HighWire-hosted journal article supplement (doi:10.1101/gr.276192.121), 2022-07-01
Supplement: Supplemental_Table_S8.xlsx.xlsx [file Supplemental_Table_S8.xlsx.xlsx]

## Sheet: description
Supplemental Table S8 : List of IPA:LE down-regulation events induced by doxorubicin in the cytosol but not in the nucleus of MCF-7 cells by 3’-seq analysis (‘Cyto IPA:LE down’ events; BED file).

## Sheet: bed file
chr1	1254044	1254251	mpeak_1	chr1_1247304_1260067_CPSF3L_NM_-	chr1|CPSF3L_NM	-
chr1	6516677	6516734	mpeak_2	chr1_6484847_6520058_ESPN_NM_+	chr1|ESPN_NM	+
chr1	7836778	7836837	mpeak_3	chr1_7831328_7839685_VAMP3_NM_+	chr1|VAMP3_NM	+
chr1	8786383	8786442	mpeak_4	chr1_8415180_8877699_RERE_NM_-	chr1|RERE_NM	-
chr1	9665172	9665222	mpeak_5	chr1_9648931_9673043_TMEM201_NM_+	chr1|TMEM201_NM	+
chr1	9996629	9996693	mpeak_6	chr1_9990515_10002826_LZIC_NM_-	chr1|LZIC_NM	-
chr1	14125726	14125834	mpeak_7	chr1_14026734_14149653_PRDM2_NM_+	chr1|PRDM2_NM	+
chr1	16931898	16931967	mpeak_8	chr1_16890681_16940100_NBPF1_NM_-	chr1|NBPF1_NM	-
chr1	21097420	21097508	mpeak_9	chr1_21071584_21113181_HP1BP3_NM_-	chr1|HP1BP3_NM	-
chr1	21175973	21176028	mpeak_10	chr1_21133993_21503381_EIF4G3_NM_-	chr1|EIF4G3_NM	-
chr1	21985365	21985501	mpeak_11	chr1_21923757_21995856_RAP1GAP_NM_-	chr1|RAP1GAP_NM	-
chr1	24971810	24971868	mpeak_12	chr1_24969593_24998672_SRRM1_NM_+	chr1|SRRM1_NM	+
chr1	33141726	33141781	mpeak_13	chr1_33116748_33145240_RBBP4_NM_+	chr1|RBBP4_NM	+
chr1	36224996	36225233	mpeak_14	chr1_36202207_36235551_CLSPN_NM_-	chr1|CLSPN_NM	-
chr1	38399625	38399675	mpeak_15	chr1_38328102_38412729_INPP5B_NM_-	chr1|INPP5B_NM	-
chr1	38400880	38400934	mpeak_16	chr1_38328102_38412729_INPP5B_NM_-	chr1|INPP5B_NM	-
chr1	46072983	46073404	mpeak_17	chr1_46049659_46083732_NASP_NM_+	chr1|NASP_NM	+
chr1	46082294	46082372	mpeak_18	chr1_46049659_46083732_NASP_NM_+	chr1|NASP_NM	+
chr1	46749840	46749894	mpeak_19	chr1_46744756_46769038_LRRC41_NM_-	chr1|LRRC41_NM	-
chr1	62291061	62291173	mpeak_20	chr1_62208148_62626579_INADL_NM_+	chr1|INADL_NM	+
chr1	62330475	62330545	mpeak_21	chr1_62208148_62626579_INADL_NM_+	chr1|INADL_NM	+
chr1	93089747	93089897	mpeak_22	chr1_92979527_93257961_EVI5_NM_-	chr1|EVI5_NM	-
chr1	95313570	95313622	mpeak_23	chr1_95285897_95360373_SLC44A3_NM_+	chr1|SLC44A3_NM	+
chr1	109484058	109484173	mpeak_24	chr1_109475123_109506121_CLCC1_NM_-	chr1|CLCC1_NM	-
chr1	109967875	109967939	mpeak_25	chr1_109944712_109969108_PSMA5_NM_-	chr1|PSMA5_NM	-
chr1	111705466	111705641	mpeak_26	chr1_111682248_111726812_CEPT1_NM_+	chr1|CEPT1_NM	+
chr1	114267377	114267436	mpeak_27	chr1_114240347_114301777_PHTF1_NM_-	chr1|PHTF1_NM	-
chr1	114269030	114269120	mpeak_28	chr1_114240347_114301777_PHTF1_NM_-	chr1|PHTF1_NM	-
chr1	114289374	114289460	mpeak_29	chr1_114240347_114301777_PHTF1_NM_-	chr1|PHTF1_NM	-
chr1	114291764	114291912	mpeak_30	chr1_114240347_114301777_PHTF1_NM_-	chr1|PHTF1_NM	-
chr1	114438818	114438939	mpeak_31	chr1_114438114_114447746_AP4B1_NM_-	chr1|AP4B1_NM	-
chr1	144930402	144930461	mpeak_32	chr1_144852499_145076186_PDE4DIP_NM_-	chr1|PDE4DIP_NM	-
chr1	154961433	154961496	mpeak_33	chr1_154955769_154965188_FLAD1_NM_+	chr1|FLAD1_NM	+
chr1	156520602	156520661	mpeak_34	chr1_156496391_156542396_IQGAP3_NM_-	chr1|IQGAP3_NM	-
chr1	161043911	161044073	mpeak_35	chr1_161042675_161059385_PVRL4_NM_-	chr1|PVRL4_NM	-
chr1	193038320	193038428	mpeak_36	chr1_193028551_193053708_TROVE2_NR_+	chr1|TROVE2_NR	+
chr1	211434492	211434575	mpeak_37	chr1_211432707_211486765_RCOR3_NM_+	chr1|RCOR3_NM	+
chr1	220932284	220932388	mpeak_38	chr1_220921675_220957260_MARC2_NM_+	chr1|MARC2_NM	+
chr1	222823625	222823717	mpeak_39	chr1_222791443_222838650_MIA3_NM_+	chr1|MIA3_NM	+
chr1	233362196	233362250	mpeak_40	chr1_233120223_233431459_PCNXL2_NM_-	chr1|PCNXL2_NM	-
chr1	246827267	246827320	mpeak_41	chr1_246729638_246829001_CNST_NM_+	chr1|CNST_NM	+
chr1	247312692	247312742	mpeak_42	chr1_247287173_247335319_ZNF124_NM_-	chr1|ZNF124_NM	-
chr1	247318250	247318348	mpeak_43	chr1_247287173_247335319_ZNF124_NM_-	chr1|ZNF124_NM	-
chr10	5727790	5727880	mpeak_44	chr10_5726800_5804991_FAM208B_NM_+	chr10|FAM208B_NM	+
chr10	12292046	12292117	mpeak_45	chr10_12237960_12292309_CDC123_NM_+	chr10|CDC123_NM	+
chr10	29944972	29945030	mpeak_46	chr10_29747262_30024730_SVIL_NM_-	chr10|SVIL_NM	-
chr10	52220523	52220582	mpeak_47	chr10_52067081_52383737_SGMS1_NM_-	chr10|SGMS1_NM	-
chr10	76014580	76014640	mpeak_48	chr10_75910942_76468078_ADK_NM_+	chr10|ADK_NM	+
chr10	76408383	76408556	mpeak_49	chr10_75910942_76468078_ADK_NM_+	chr10|ADK_NM	+
chr10	88603537	88603722	mpeak_50	chr10_88516395_88683350_BMPR1A_NM_+	chr10|BMPR1A_NM	+
chr10	94675731	94675797	mpeak_51	chr10_94594469_94817979_EXOC6_NM_+	chr10|EXOC6_NM	+
chr10	100162153	100162291	mpeak_52	chr10_100143625_100174978_PYROXD2_NM_-	chr10|PYROXD2_NM	-
chr10	101950522	101950581	mpeak_53	chr10_101949384_101989344_CHUK_NM_-	chr10|CHUK_NM	-
chr10	101978536	101978591	mpeak_54	chr10_101949384_101989344_CHUK_NM_-	chr10|CHUK_NM	-
chr10	102134120	102134260	mpeak_55	chr10_102133332_102147793_OLMALINC_NR_+	chr10|OLMALINC_NR	+
chr10	102134339	102134459	mpeak_56	chr10_102133332_102147793_OLMALINC_NR_+	chr10|OLMALINC_NR	+
chr10	102142941	102143181	mpeak_57	chr10_102133332_102147793_OLMALINC_NR_+	chr10|OLMALINC_NR	+
chr10	102143247	102143407	mpeak_58	chr10_102133332_102147793_OLMALINC_NR_+	chr10|OLMALINC_NR	+
chr10	102745997	102746094	mpeak_59	chr10_102739129_102747276_MRPL43_NM_-	chr10|MRPL43_NM	-
chr10	102823872	102823960	mpeak_60	chr10_102820998_102824582_KAZALD1_NM_+	chr10|KAZALD1_NM	+
chr10	118659619	118659795	mpeak_61	chr10_118646077_118886097_SHTN1_NM_-	chr10|SHTN1_NM	-
chr10	127480077	127480148	mpeak_62	chr10_127477574_127511837_UROS_NM_-	chr10|UROS_NM	-
chr10	127524239	127524309	mpeak_63	chr10_127512103_127541693_BCCIP_NM_+	chr10|BCCIP_NM	+
chr10	131902833	131902949	mpeak_64	chr10_131862647_131909081_LINC00959_NR_-	chr10|LINC00959_NR	-
chr10	131936971	131937101	mpeak_65	chr10_131934638_131978376_GLRX3_NM_+	chr10|GLRX3_NM	+
chr10	135000266	135000320	mpeak_66	chr10_134973970_135038162_KNDC1_NM_+	chr10|KNDC1_NM	+
chr11	458115	458200	mpeak_67	chr11_450279_490419_PTDSS2_NM_+	chr11|PTDSS2_NM	+
chr11	9311364	9311510	mpeak_68	chr11_9302588_9336315_TMEM41B_NR_-	chr11|TMEM41B_NR	-
chr11	10064386	10064443	mpeak_69	chr11_9802063_10315754_SBF2_NM_-	chr11|SBF2_NM	-
chr11	20502210	20502268	mpeak_70	chr11_20409075_20529849_PRMT3_NM_+	chr11|PRMT3_NM	+
chr11	34165019	34165081	mpeak_71	chr11_34127110_34167630_NAT10_NM_+	chr11|NAT10_NM	+
chr11	43411950	43412000	mpeak_72	chr11_43380434_43515322_TTC17_NM_+	chr11|TTC17_NM	+
chr11	43468010	43468149	mpeak_73	chr11_43380434_43515322_TTC17_NM_+	chr11|TTC17_NM	+
chr11	47842832	47842978	mpeak_74	chr11_47800746_47870057_NUP160_NM_-	chr11|NUP160_NM	-
chr11	47856782	47856835	mpeak_75	chr11_47800746_47870057_NUP160_NM_-	chr11|NUP160_NM	-
chr11	48099991	48100059	mpeak_76	chr11_48002109_48188755_PTPRJ_NM_+	chr11|PTPRJ_NM	+
chr11	62283367	62283435	mpeak_77	chr11_62201363_62314332_AHNAK_NM_-	chr11|AHNAK_NM	-
chr11	62578854	62578932	mpeak_78	chr11_62575138_62599563_STX5_NM_-	chr11|STX5_NM	-
chr11	62581436	62581508	mpeak_79	chr11_62575138_62599563_STX5_NM_-	chr11|STX5_NM	-
chr11	64000462	64000520	mpeak_80	chr11_63997752_64001365_DNAJC4_NM_+	chr11|DNAJC4_NM	+
chr11	64033598	64033681	mpeak_81	chr11_64018994_64034824_PLCB3_NM_+	chr11|PLCB3_NM	+
chr11	65733544	65733690	mpeak_82	chr11_65729159_65746482_SART1_NM_+	chr11|SART1_NM	+
chr11	65736748	65736798	mpeak_83	chr11_65729159_65746482_SART1_NM_+	chr11|SART1_NM	+
chr11	66443814	66443946	mpeak_84	chr11_66433049_66445392_RBM4B_NM_-	chr11|RBM4B_NM	-
chr11	66456115	66456172	mpeak_85	chr11_66453575_66488870_SPTBN2_NM_-	chr11|SPTBN2_NM	-
chr11	66578012	66578069	mpeak_86	chr11_66512206_66610639_C11orf80_NM_+	chr11|C11orf80_NM	+
chr11	66580075	66580138	mpeak_87	chr11_66512206_66610639_C11orf80_NM_+	chr11|C11orf80_NM	+
chr11	68697917	68697989	mpeak_88	chr11_68671318_68707001_IGHMBP2_NM_+	chr11|IGHMBP2_NM	+
chr11	72466293	72466424	mpeak_89	chr11_72466187_72504750_STARD10_NM_-	chr11|STARD10_NM	-
chr11	73059776	73059833	mpeak_90	chr11_73019662_73078628_ARHGEF17_NM_+	chr11|ARHGEF17_NM	+
chr11	93474480	93474538	mpeak_91	chr11_93469470_93474703_TAF1D_NM_-	chr11|TAF1D_NM	-
chr11	108100037	108100092	mpeak_92	chr11_108093558_108236051_ATM_NM_+	chr11|ATM_NM	+
chr11	114318319	114318373	mpeak_93	chr11_114310107_114320567_REXO2_NM_+	chr11|REXO2_NM	+
chr11	118506376	118506434	mpeak_94	chr11_118477212_118527392_PHLDB1_NM_+	chr11|PHLDB1_NM	+
chr12	7591545	7591664	mpeak_95	chr12_7507726_7596781_CD163L1_NM_-	chr12|CD163L1_NM	-
chr12	30784818	30784879	mpeak_96	chr12_30783891_30848929_IPO8_NM_-	chr12|IPO8_NM	-
chr12	30789908	30790000	mpeak_97	chr12_30783891_30848929_IPO8_NM_-	chr12|IPO8_NM	-
chr12	32340393	32340451	mpeak_98	chr12_32260184_32530473_BICD1_NM_+	chr12|BICD1_NM	+
chr12	32485942	32486004	mpeak_99	chr12_32260184_32530473_BICD1_NM_+	chr12|BICD1_NM	+
chr12	32490879	32491142	mpeak_100	chr12_32260184_32530473_BICD1_NM_+	chr12|BICD1_NM	+
chr12	50028552	50028602	mpeak_101	chr12_50017196_50037882_PRPF40B_NM_+	chr12|PRPF40B_NM	+
chr12	57455862	57455920	mpeak_102	chr12_57453842_57472574_NEMP1_NM_-	chr12|NEMP1_NM	-
chr12	62669315	62669385	mpeak_103	chr12_62654120_62797972_USP15_NM_+	chr12|USP15_NM	+
chr12	69776993	69777238	mpeak_104	chr12_69753489_69783926_YEATS4_NM_+	chr12|YEATS4_NM	+
chr12	112120943	112121002	mpeak_105	chr12_112082366_112123800_BRAP_NM_-	chr12|BRAP_NM	-
chr12	113380028	113380104	mpeak_106	chr12_113376237_113407766_OAS3_NM_+	chr12|OAS3_NM	+
chr12	113382641	113382795	mpeak_107	chr12_113376237_113407766_OAS3_NM_+	chr12|OAS3_NM	+
chr12	113625052	113625118	mpeak_108	chr12_113623330_113629114_RITA1_NM_+	chr12|RITA1_NM	+
chr12	120208581	120208707	mpeak_109	chr12_120126060_120315095_CIT_NM_-	chr12|CIT_NM	-
chr12	121789207	121789333	mpeak_110	chr12_121746494_121792012_ANAPC5_NM_-	chr12|ANAPC5_NM	-
chr12	122473285	122473338	mpeak_111	chr12_122459791_122496997_BCL7A_NM_+	chr12|BCL7A_NM	+
chr12	122985182	122985236	mpeak_112	chr12_122958822_122985620_ZCCHC8_NM_-	chr12|ZCCHC8_NM	-
chr12	132478685	132478823	mpeak_113	chr12_132434464_132561945_EP400_NM_+	chr12|EP400_NM	+
chr12	133308015	133308073	mpeak_114	chr12_133304029_133338474_ANKLE2_NM_-	chr12|ANKLE2_NM	-
chr12	133518710	133518842	mpeak_115	chr12_133503748_133532892_ZNF605_NM_-	chr12|ZNF605_NM	-
chr13	21370033	21370191	mpeak_116	chr13_21358058_21476913_XPO4_NM_-	chr13|XPO4_NM	-
chr13	34409524	34409586	mpeak_117	chr13_34392205_34540223_RFC3_NM_+	chr13|RFC3_NM	+
chr13	34411578	34411647	mpeak_118	chr13_34392205_34540223_RFC3_NM_+	chr13|RFC3_NM	+
chr13	37579198	37579337	mpeak_119	chr13_37574677_37583320_EXOSC8_NM_+	chr13|EXOSC8_NM	+
chr13	41803313	41803368	mpeak_120	chr13_41791364_41837713_MTRF1_NM_-	chr13|MTRF1_NM	-
chr13	42452807	42452959	mpeak_121	chr13_42142441_42535221_VWA8_NM_-	chr13|VWA8_NM	-
chr13	42882686	42882750	mpeak_122	chr13_42846288_42893223_AKAP11_NM_+	chr13|AKAP11_NM	+
chr13	46080591	46080687	mpeak_123	chr13_46039029_46108836_COG3_NM_+	chr13|COG3_NM	+
chr13	46099582	46099708	mpeak_124	chr13_46039029_46108836_COG3_NM_+	chr13|COG3_NM	+
chr13	67775144	67775203	mpeak_125	chr13_66879160_67804468_PCDH9_NM_-	chr13|PCDH9_NM	-
chr13	67798547	67798695	mpeak_126	chr13_66879160_67804468_PCDH9_NM_-	chr13|PCDH9_NM	-
chr13	77670441	77670542	mpeak_127	chr13_77619628_77901177_MYCBP2_NM_-	chr13|MYCBP2_NM	-
chr13	77825431	77825500	mpeak_128	chr13_77619628_77901177_MYCBP2_NM_-	chr13|MYCBP2_NM	-
chr13	96412927	96412998	mpeak_129	chr13_96329392_96443126_DNAJC3_NM_+	chr13|DNAJC3_NM	+
chr13	100914992	100915094	mpeak_130	chr13_100741268_101182351_PCCA_NM_+	chr13|PCCA_NM	+
chr13	115016519	115016569	mpeak_131	chr13_115000361_115037658_CDC16_NM_+	chr13|CDC16_NM	+
chr14	19684330	19684478	mpeak_132	chr14_19650031_19691354_DUXAP10_NR_+	chr14|DUXAP10_NR	+
chr14	24032293	24032359	mpeak_133	chr14_24029059_24037045_AP1G2_NM_-	chr14|AP1G2_NM	-
chr14	24453195	24453525	mpeak_134	chr14_24439082_24475094_DHRS4L2_NM_+	chr14|DHRS4L2_NM	+
chr14	24707068	24707197	mpeak_135	chr14_24701627_24707794_GMPR2_NR_+	chr14|GMPR2_NR	+
chr14	31918113	31918168	mpeak_136	chr14_31917660_31926680_DTD2_NM_-	chr14|DTD2_NM	-
chr14	34418515	34418595	mpeak_137	chr14_34395128_34420284_EGLN3_NM_-	chr14|EGLN3_NM	-
chr14	35244656	35244707	mpeak_138	chr14_35222910_35344853_BAZ1A_NM_-	chr14|BAZ1A_NM	-
chr14	51390442	51390624	mpeak_139	chr14_51372274_51411248_PYGL_NM_-	chr14|PYGL_NM	-
chr14	51409761	51409963	mpeak_140	chr14_51372274_51411248_PYGL_NM_-	chr14|PYGL_NM	-
chr14	58785270	58785530	mpeak_141	chr14_58765221_58838603_ARID4A_NM_+	chr14|ARID4A_NM	+
chr14	60622705	60622859	mpeak_142	chr14_60611731_60632211_DHRS7_NM_-	chr14|DHRS7_NM	-
chr14	61923998	61924048	mpeak_143	chr14_61788160_62016402_PRKCH_NM_+	chr14|PRKCH_NM	+
chr14	64491618	64491681	mpeak_144	chr14_64319682_64692036_SYNE2_NM_+	chr14|SYNE2_NM	+
chr14	69896141	69896194	mpeak_145	chr14_69865095_69925079_SLC39A9_NM_+	chr14|SLC39A9_NM	+
chr14	74331384	74331521	mpeak_146	chr14_74318533_74350803_PTGR2_NM_+	chr14|PTGR2_NM	+
chr14	76151257	76151345	mpeak_147	chr14_76127550_76420766_TTLL5_NM_+	chr14|TTLL5_NM	+
chr14	90393071	90393129	mpeak_148	chr14_90263668_90421121_EFCAB11_NM_-	chr14|EFCAB11_NM	-
chr14	96920627	96920684	mpeak_149	chr14_96858447_96954641_AK7_NM_+	chr14|AK7_NM	+
chr14	97321557	97321623	mpeak_150	chr14_97263683_97347513_VRK1_NM_+	chr14|VRK1_NM	+
chr14	100350064	100350119	mpeak_151	chr14_100259744_100406323_EML1_NM_+	chr14|EML1_NM	+
chr14	102376675	102376740	mpeak_152	chr14_102228134_102391477_PPP2R5C_NM_+	chr14|PPP2R5C_NM	+
chr14	102825745	102825806	mpeak_153	chr14_102815096_102829253_CINP_NM_-	chr14|CINP_NM	-
chr14	103253287	103253343	mpeak_154	chr14_103243815_103371549_TRAF3_NM_+	chr14|TRAF3_NM	+
chr15	25585236	25585386	mpeak_155	chr15_25584404_25684175_UBE3A_NM_-	chr15|UBE3A_NM	-
chr15	31196134	31196231	mpeak_156	chr15_31196054_31233768_FAN1_NM_+	chr15|FAN1_NM	+
chr15	40266068	40266232	mpeak_157	chr15_40226324_40327227_EIF2AK4_NM_+	chr15|EIF2AK4_NM	+
chr15	41100789	41100933	mpeak_158	chr15_41099273_41106345_ZFYVE19_NM_+	chr15|ZFYVE19_NM	+
chr15	41550719	41550772	mpeak_159	chr15_41523436_41571533_CHP1_NM_+	chr15|CHP1_NM	+
chr15	42805591	42805648	mpeak_160	chr15_42787503_42823610_SNAP23_NM_+	chr15|SNAP23_NM	+
chr15	48454426	48454492	mpeak_161	chr15_48446090_48470558_MYEF2_NR_-	chr15|MYEF2_NR	-
chr15	48454930	48455006	mpeak_162	chr15_48446090_48470558_MYEF2_NR_-	chr15|MYEF2_NR	-
chr15	50762524	50762584	mpeak_163	chr15_50716573_50791099_USP8_NM_+	chr15|USP8_NM	+
chr15	50894077	50894220	mpeak_164	chr15_50854005_50979012_TRPM7_NM_-	chr15|TRPM7_NM	-
chr15	52673738	52673795	mpeak_165	chr15_52606045_52821247_MYO5A_NM_-	chr15|MYO5A_NM	-
chr15	52673851	52673908	mpeak_166	chr15_52606045_52821247_MYO5A_NM_-	chr15|MYO5A_NM	-
chr15	58895773	58895841	mpeak_167	chr15_58889840_59042177_ADAM10_NM_-	chr15|ADAM10_NM	-
chr15	58958008	58958068	mpeak_168	chr15_58889840_59042177_ADAM10_NM_-	chr15|ADAM10_NM	-
chr15	59806502	59806633	mpeak_169	chr15_59730371_59813452_FAM81A_NM_+	chr15|FAM81A_NM	+
chr15	62150418	62150470	mpeak_170	chr15_62146757_62352664_VPS13C_NM_-	chr15|VPS13C_NM	-
chr15	69727986	69728090	mpeak_171	chr15_69706584_69740130_KIF23_NM_+	chr15|KIF23_NM	+
chr15	74335628	74335724	mpeak_172	chr15_74287013_74336561_PML_NM_+	chr15|PML_NM	+
chr15	80455424	80455483	mpeak_173	chr15_80445232_80478471_FAH_NM_+	chr15|FAH_NM	+
chr15	85644845	85645028	mpeak_174	chr15_85523743_85681027_PDE8A_NM_+	chr15|PDE8A_NM	+
chr15	85666344	85666433	mpeak_175	chr15_85523743_85681027_PDE8A_NM_+	chr15|PDE8A_NM	+
chr15	93487867	93488089	mpeak_176	chr15_93443550_93567601_CHD2_NM_+	chr15|CHD2_NM	+
chr16	568969	569030	mpeak_177	chr16_475667_570725_RAB11FIP3_NM_+	chr16|RAB11FIP3_NM	+
chr16	1586601	1586668	mpeak_178	chr16_1561151_1662109_IFT140_NM_-	chr16|IFT140_NM	-
chr16	1757847	1757973	mpeak_179	chr16_1756220_1818703_MAPK8IP3_NM_+	chr16|MAPK8IP3_NM	+
chr16	1805801	1805933	mpeak_180	chr16_1756220_1818703_MAPK8IP3_NM_+	chr16|MAPK8IP3_NM	+
chr16	2386860	2386981	mpeak_181	chr16_2326806_2390747_ABCA3_NM_-	chr16|ABCA3_NM	-
chr16	2389434	2389545	mpeak_182	chr16_2326806_2390747_ABCA3_NM_-	chr16|ABCA3_NM	-
chr16	3178829	3178887	mpeak_183	chr16_3175967_3184883_ZNF213-AS1_NR_-	chr16|ZNF213-AS1_NR	-
chr16	3181662	3181726	mpeak_184	chr16_3175967_3184883_ZNF213-AS1_NR_-	chr16|ZNF213-AS1_NR	-
chr16	14031169	14031299	mpeak_185	chr16_14014013_14041470_ERCC4_NM_+	chr16|ERCC4_NM	+
chr16	14271816	14271921	mpeak_186	chr16_14165169_14354765_MKL2_NM_+	chr16|MKL2_NM	+
chr16	14744392	14744703	mpeak_187	chr16_14726667_14761491_BFAR_NM_+	chr16|BFAR_NM	+
chr16	15092216	15092269	mpeak_188	chr16_15068591_15232735_PDXDC1_NM_+	chr16|PDXDC1_NM	+
chr16	24960440	24960507	mpeak_189	chr16_24931581_25026699_ARHGAP17_NM_-	chr16|ARHGAP17_NM	-
chr16	27694324	27694380	mpeak_190	chr16_27561467_27789894_KIAA0556_NM_+	chr16|KIAA0556_NM	+
chr16	30537635	30537695	mpeak_191	chr16_30537372_30537910_ZNF768_NM_-	chr16|ZNF768_NM	-
chr16	30582321	30582415	mpeak_192	chr16_30581757_30583728_ZNF688_NM_-	chr16|ZNF688_NM	-
chr16	30737469	30737667	mpeak_193	chr16_30710461_30748369_SRCAP_NM_+	chr16|SRCAP_NM	+
chr16	31086165	31086232	mpeak_194	chr16_31085742_31094291_ZNF646_NM_+	chr16|ZNF646_NM	+
chr16	31086402	31086597	mpeak_195	chr16_31085742_31094291_ZNF646_NM_+	chr16|ZNF646_NM	+
chr16	31093312	31093417	mpeak_196	chr16_31085742_31094291_ZNF646_NM_+	chr16|ZNF646_NM	+
chr16	46617424	46617503	mpeak_197	chr16_46615966_46655311_SHCBP1_NM_-	chr16|SHCBP1_NM	-
chr16	58047398	58047480	mpeak_198	chr16_58035276_58054044_USB1_NM_+	chr16|USB1_NM	+
chr16	67987629	67987799	mpeak_199	chr16_67978834_68002597_SLC12A4_NM_-	chr16|SLC12A4_NM	-
chr16	69398850	69398926	mpeak_200	chr16_69390959_69419891_TERF2_NM_-	chr16|TERF2_NM	-
chr16	70548137	70548197	mpeak_201	chr16_70515047_70557457_COG4_NM_-	chr16|COG4_NM	-
chr16	71672410	71672565	mpeak_202	chr16_71660055_71674292_MARVELD3_NM_+	chr16|MARVELD3_NM	+
chr16	74734341	74734541	mpeak_203	chr16_74706436_74734789_MLKL_NM_-	chr16|MLKL_NM	-
chr16	78154810	78154865	mpeak_204	chr16_78133309_78312499_WWOX_NR_+	chr16|WWOX_NR	+
chr16	81065033	81065098	mpeak_205	chr16_81040102_81066174_CENPN_NM_+	chr16|CENPN_NM	+
chr17	3969789	3969839	mpeak_206	chr17_3910264_4046253_ZZEF1_NM_-	chr17|ZZEF1_NM	-
chr17	17391486	17391551	mpeak_207	chr17_17380299_17394592_MED9_NM_+	chr17|MED9_NM	+
chr17	17437217	17437275	mpeak_208	chr17_17409162_17495017_PEMT_NM_-	chr17|PEMT_NM	-
chr17	38248747	38248900	mpeak_209	chr17_38218445_38249272_THRA_NM_+	chr17|THRA_NM	+
chr17	38286422	38286565	mpeak_210	chr17_38278789_38290531_MSL1_NM_+	chr17|MSL1_NM	+
chr17	45010334	45010395	mpeak_211	chr17_45000485_45015964_GOSR2_NM_+	chr17|GOSR2_NM	+
chr17	45014278	45014477	mpeak_212	chr17_45000485_45015964_GOSR2_NM_+	chr17|GOSR2_NM	+
chr17	49072409	49072555	mpeak_213	chr17_49043748_49198226_SPAG9_NM_-	chr17|SPAG9_NM	-
chr17	54910015	54910319	mpeak_214	chr17_54869713_54911256_C17orf67_NM_-	chr17|C17orf67_NM	-
chr17	55339511	55339567	mpeak_215	chr17_55333930_55756909_MSI2_NM_+	chr17|MSI2_NM	+
chr17	55353837	55353892	mpeak_216	chr17_55333930_55756909_MSI2_NM_+	chr17|MSI2_NM	+
chr17	55544667	55544944	mpeak_217	chr17_55333930_55756909_MSI2_NM_+	chr17|MSI2_NM	+
chr17	57088608	57088724	mpeak_218	chr17_57060282_57184266_TRIM37_NM_-	chr17|TRIM37_NM	-
chr17	57089455	57089514	mpeak_219	chr17_57060282_57184266_TRIM37_NM_-	chr17|TRIM37_NM	-
chr17	57096032	57096149	mpeak_220	chr17_57060282_57184266_TRIM37_NM_-	chr17|TRIM37_NM	-
chr17	57105201	57105288	mpeak_221	chr17_57060282_57184266_TRIM37_NM_-	chr17|TRIM37_NM	-
chr17	57125671	57125852	mpeak_222	chr17_57060282_57184266_TRIM37_NM_-	chr17|TRIM37_NM	-
chr17	57164629	57164771	mpeak_223	chr17_57060282_57184266_TRIM37_NM_-	chr17|TRIM37_NM	-
chr17	60081233	60081383	mpeak_224	chr17_60023961_60142643_MED13_NM_-	chr17|MED13_NM	-
chr17	60087779	60087862	mpeak_225	chr17_60023961_60142643_MED13_NM_-	chr17|MED13_NM	-
chr17	62278274	62278431	mpeak_226	chr17_62226451_62340683_TEX2_NM_-	chr17|TEX2_NM	-
chr17	62619796	62619872	mpeak_227	chr17_62542065_62658386_SMURF2_NM_-	chr17|SMURF2_NM	-
chr17	73562993	73563186	mpeak_228	chr17_73521782_73570951_LLGL2_NM_+	chr17|LLGL2_NM	+
chr17	74221857	74222104	mpeak_229	chr17_74141434_74236390_RNF157_NM_-	chr17|RNF157_NM	-
chr17	74714504	74714677	mpeak_230	chr17_74712804_74722881_JMJD6_NM_-	chr17|JMJD6_NM	-
chr17	75094962	75095078	mpeak_231	chr17_75084724_75209999_SEC14L1_NM_+	chr17|SEC14L1_NM	+
chr17	78929969	78930118	mpeak_232	chr17_78518624_78938061_RPTOR_NM_+	chr17|RPTOR_NM	+
chr17	79232155	79232215	mpeak_233	chr17_79220473_79269139_SLC38A10_NM_-	chr17|SLC38A10_NM	-
chr18	2666150	2666206	mpeak_234	chr18_2655885_2802525_SMCHD1_NM_+	chr18|SMCHD1_NM	+
chr18	9135710	9135776	mpeak_235	chr18_9121454_9136718_NDUFV2-AS1_NR_-	chr18|NDUFV2-AS1_NR	-
chr18	9367811	9367898	mpeak_236	chr18_9334764_9399343_TWSG1_NM_+	chr18|TWSG1_NM	+
chr18	19140814	19140866	mpeak_237	chr18_19110451_19180693_ESCO1_NM_-	chr18|ESCO1_NM	-
chr18	21746533	21746612	mpeak_238	chr18_21743245_21977833_OSBPL1A_NM_-	chr18|OSBPL1A_NM	-
chr18	21937050	21937141	mpeak_239	chr18_21743245_21977833_OSBPL1A_NM_-	chr18|OSBPL1A_NM	-
chr18	24122930	24122994	mpeak_240	chr18_24035865_24237365_KCTD1_NM_-	chr18|KCTD1_NM	-
chr18	55233766	55233908	mpeak_241	chr18_55218078_55253969_FECH_NM_-	chr18|FECH_NM	-
chr18	77726624	77726696	mpeak_242	chr18_77724581_77730439_HSBP1L1_NM_+	chr18|HSBP1L1_NM	+
chr19	6381128	6381184	mpeak_243	chr19_6380496_6393291_GTF2F1_NM_-	chr19|GTF2F1_NM	-
chr19	6734566	6734621	mpeak_244	chr19_6730395_6737633_GPR108_NM_-	chr19|GPR108_NM	-
chr19	9927366	9927417	mpeak_245	chr19_9922393_9929731_FBXL12_NM_-	chr19|FBXL12_NM	-
chr19	10689186	10689307	mpeak_246	chr19_10683764_10697991_AP1M2_NM_-	chr19|AP1M2_NM	-
chr19	12883881	12884119	mpeak_247	chr19_12874245_12886434_HOOK2_NM_-	chr19|HOOK2_NM	-
chr19	12884498	12884571	mpeak_248	chr19_12874245_12886434_HOOK2_NM_-	chr19|HOOK2_NM	-
chr19	14116910	14116964	mpeak_249	chr19_14073676_14117134_RFX1_NM_-	chr19|RFX1_NM	-
chr19	15283146	15283292	mpeak_250	chr19_15272525_15311792_NOTCH3_NM_-	chr19|NOTCH3_NM	-
chr19	18053453	18053506	mpeak_251	chr19_18043823_18054316_CCDC124_NM_+	chr19|CCDC124_NM	+
chr19	28294267	28294383	mpeak_252	chr19_28284374_28296512_LOC101927151_NR_+	chr19|LOC101927151_NR	+
chr19	32920322	32920482	mpeak_253	chr19_32896654_32972984_DPY19L3_NM_+	chr19|DPY19L3_NM	+
chr19	33184032	33184107	mpeak_254	chr19_33182866_33202657_NUDT19_NM_+	chr19|NUDT19_NM	+
chr19	33473794	33473864	mpeak_255	chr19_33471162_33555824_RHPN2_NM_-	chr19|RHPN2_NM	-
chr19	36815804	36815969	mpeak_256	chr19_36804224_36822620_LINC00665_NR_-	chr19|LINC00665_NR	-
chr19	41221279	41221486	mpeak_257	chr19_41198278_41222790_ADCK4_NM_-	chr19|ADCK4_NM	-
chr19	41826845	41826962	mpeak_258	chr19_41816093_41828499_CCDC97_NM_+	chr19|CCDC97_NM	+
chr19	45916456	45916579	mpeak_259	chr19_45912983_45927177_ERCC1_NM_-	chr19|ERCC1_NM	-
chr19	47882334	47882410	mpeak_260	chr19_47852537_47885236_DHX34_NM_+	chr19|DHX34_NM	+
chr19	49664370	49664423	mpeak_261	chr19_49661015_49714750_TRPM4_NM_+	chr19|TRPM4_NM	+
chr19	50370013	50370115	mpeak_262	chr19_50364622_50370822_PNKP_NM_-	chr19|PNKP_NM	-
chr19	54672888	54673002	mpeak_263	chr19_54664111_54676944_TMC4_NM_-	chr19|TMC4_NM	-
chr19	56109414	56109561	mpeak_264	chr19_56105012_56110893_FIZ1_NM_-	chr19|FIZ1_NM	-
chr19	59077073	59077131	mpeak_265	chr19_59074871_59084942_MZF1_NM_-	chr19|MZF1_NM	-
chr2	3481458	3481510	mpeak_266	chr2_3383445_3482989_TRAPPC12_NM_+	chr2|TRAPPC12_NM	+
chr2	11725060	11725265	mpeak_267	chr2_11674241_11780416_GREB1_NM_+	chr2|GREB1_NM	+
chr2	26508329	26508451	mpeak_268	chr2_26467615_26512785_HADHB_NM_+	chr2|HADHB_NM	+
chr2	29092291	29092342	mpeak_269	chr2_29073108_29093175_TRMT61B_NM_-	chr2|TRMT61B_NM	-
chr2	32428093	32428145	mpeak_270	chr2_32390909_32445281_SLC30A6_NM_+	chr2|SLC30A6_NM	+
chr2	32697546	32697599	mpeak_271	chr2_32582095_32842791_BIRC6_NM_+	chr2|BIRC6_NM	+
chr2	37121041	37121185	mpeak_272	chr2_37076768_37193615_STRN_NM_-	chr2|STRN_NM	-
chr2	37230682	37230756	mpeak_273	chr2_37208937_37311488_HEATR5B_NM_-	chr2|HEATR5B_NM	-
chr2	39274080	39274172	mpeak_274	chr2_39213456_39347604_SOS1_NM_-	chr2|SOS1_NM	-
chr2	44443234	44443299	mpeak_275	chr2_44395941_44459454_PPM1B_NM_+	chr2|PPM1B_NM	+
chr2	44619161	44619218	mpeak_276	chr2_44589042_44999174_CAMKMT_NM_+	chr2|CAMKMT_NM	+
chr2	55746897	55747057	mpeak_277	chr2_55746730_55772042_CFAP36_NM_+	chr2|CFAP36_NM	+
chr2	58311216	58311280	mpeak_278	chr2_58134785_58386483_VRK2_NM_+	chr2|VRK2_NM	+
chr2	71135714	71135774	mpeak_279	chr2_71127719_71159896_VAX2_NM_+	chr2|VAX2_NM	+
chr2	71359938	71360329	mpeak_280	chr2_71357443_71376995_MPHOSPH10_NM_+	chr2|MPHOSPH10_NM	+
chr2	74401721	74401774	mpeak_281	chr2_74383772_74405995_MOB1A_NM_-	chr2|MOB1A_NM	-
chr2	74769529	74769657	mpeak_282	chr2_74760806_74781091_LOXL3_NM_-	chr2|LOXL3_NM	-
chr2	75136674	75136741	mpeak_283	chr2_75136257_75165434_LINC01291_NR_+	chr2|LINC01291_NR	+
chr2	75881865	75882051	mpeak_284	chr2_75873908_75882189_MRPL19_NM_+	chr2|MRPL19_NM	+
chr2	99437665	99437715	mpeak_285	chr2_99411134_99552684_KIAA1211L_NM_-	chr2|KIAA1211L_NM	-
chr2	99938193	99938253	mpeak_286	chr2_99936262_99952860_TXNDC9_NM_-	chr2|TXNDC9_NM	-
chr2	101186026	101186076	mpeak_287	chr2_101179417_101192815_PDCL3_NM_+	chr2|PDCL3_NM	+
chr2	110747358	110747458	mpeak_288	chr2_110744556_110751977_LINC01123_NR_+	chr2|LINC01123_NR	+
chr2	111408674	111408728	mpeak_289	chr2_111395736_111435684_BUB1_NM_-	chr2|BUB1_NM	-
chr2	114198916	114199009	mpeak_290	chr2_114195267_114253213_CBWD2_NM_+	chr2|CBWD2_NM	+
chr2	118693063	118693135	mpeak_291	chr2_118677972_118771739_CCDC93_NM_-	chr2|CCDC93_NM	-
chr2	135700921	135701071	mpeak_292	chr2_135676391_135712050_CCNT2_NR_+	chr2|CCNT2_NR	+
chr2	142212990	142213146	mpeak_293	chr2_140990895_142889270_LRP1B_NM_-	chr2|LRP1B_NM	-
chr2	144935445	144935514	mpeak_294	chr2_144704702_145090101_GTDC1_NM_-	chr2|GTDC1_NM	-
chr2	163166267	163166524	mpeak_295	chr2_163123889_163175218_IFIH1_NM_-	chr2|IFIH1_NM	-
chr2	179977312	179977444	mpeak_296	chr2_179974755_180129350_SESTD1_NM_-	chr2|SESTD1_NM	-
chr2	183819013	183819167	mpeak_297	chr2_183790546_183903586_NCKAP1_NM_-	chr2|NCKAP1_NM	-
chr2	191761602	191761653	mpeak_298	chr2_191745546_191827555_GLS_NM_+	chr2|GLS_NM	+
chr2	191799958	191800025	mpeak_299	chr2_191745546_191827555_GLS_NM_+	chr2|GLS_NM	+
chr2	201446013	201446063	mpeak_300	chr2_201390864_201448171_SGOL2_NM_+	chr2|SGOL2_NM	+
chr2	202624173	202624233	mpeak_301	chr2_202566612_202645895_ALS2_NM_-	chr2|ALS2_NM	-
chr2	203157941	203158189	mpeak_302	chr2_203130514_203168108_NOP58_NM_+	chr2|NOP58_NM	+
chr2	220426427	220426502	mpeak_303	chr2_220415564_220436268_OBSL1_NM_-	chr2|OBSL1_NM	-
chr2	225370662	225370752	mpeak_304	chr2_225339093_225450114_CUL3_NM_-	chr2|CUL3_NM	-
chr2	230910374	230910440	mpeak_305	chr2_230902247_230933715_SLC16A14_NM_-	chr2|SLC16A14_NM	-
chr2	230920778	230920859	mpeak_306	chr2_230902247_230933715_SLC16A14_NM_-	chr2|SLC16A14_NM	-
chr2	242750271	242750414	mpeak_307	chr2_242750159_242757376_NEU4_NM_+	chr2|NEU4_NM	+
chr20	8698312	8698374	mpeak_308	chr20_8112911_8862268_PLCB1_NM_+	chr20|PLCB1_NM	+
chr20	9433985	9434118	mpeak_309	chr20_9049700_9459567_PLCB4_NM_+	chr20|PLCB4_NM	+
chr20	10019471	10019635	mpeak_310	chr20_10015646_10036149_ANKEF1_NM_+	chr20|ANKEF1_NM	+
chr20	14035092	14035157	mpeak_311	chr20_13976145_16030474_MACROD2_NM_+	chr20|MACROD2_NM	+
chr20	17951027	17951179	mpeak_312	chr20_17949761_17970581_MGME1_NM_+	chr20|MGME1_NM	+
chr20	30814666	30814773	mpeak_313	chr20_30795695_30822275_POFUT1_NM_+	chr20|POFUT1_NM	+
chr20	35408819	35408926	mpeak_314	chr20_35406234_35492087_SOGA1_NM_-	chr20|SOGA1_NM	-
chr20	35412152	35412309	mpeak_315	chr20_35406234_35492087_SOGA1_NM_-	chr20|SOGA1_NM	-
chr20	57395673	57395730	mpeak_316	chr20_57394310_57425958_GNAS-AS1_NR_-	chr20|GNAS-AS1_NR	-
chr20	57408854	57408915	mpeak_317	chr20_57394310_57425958_GNAS-AS1_NR_-	chr20|GNAS-AS1_NR	-
chr20	58494178	58494416	mpeak_318	chr20_58439443_58507209_SYCP2_NM_-	chr20|SYCP2_NM	-
chr20	60618690	60618753	mpeak_319	chr20_60551391_60640866_TAF4_NM_-	chr20|TAF4_NM	-
chr20	61533769	61533825	mpeak_320	chr20_61513766_61569304_DIDO1_NM_-	chr20|DIDO1_NM	-
chr21	22413334	22413424	mpeak_321	chr21_22370632_22910166_NCAM2_NM_+	chr21|NCAM2_NM	+
chr21	22857468	22857525	mpeak_322	chr21_22370632_22910166_NCAM2_NM_+	chr21|NCAM2_NM	+
chr21	38458014	38458171	mpeak_323	chr21_38445570_38573740_TTC3_NM_+	chr21|TTC3_NM	+
chr21	43991493	43991592	mpeak_324	chr21_43919741_44000454_SLC37A1_NM_+	chr21|SLC37A1_NM	+
chr21	44268147	44268264	mpeak_325	chr21_44263391_44299699_WDR4_NM_-	chr21|WDR4_NM	-
chr21	47879096	47879148	mpeak_326	chr21_47878861_47987282_DIP2A_NM_+	chr21|DIP2A_NM	+
chr21	48056331	48056468	mpeak_327	chr21_48055506_48084206_PRMT2_NM_+	chr21|PRMT2_NM	+
chr21	48077872	48077937	mpeak_328	chr21_48055506_48084206_PRMT2_NM_+	chr21|PRMT2_NM	+
chr22	16155446	16155599	mpeak_329	chr22_16151821_16193009_DUXAP8_NR_-	chr22|DUXAP8_NR	-
chr22	16185942	16186055	mpeak_330	chr22_16151821_16193009_DUXAP8_NR_-	chr22|DUXAP8_NR	-
chr22	18894350	18894401	mpeak_331	chr22_18893735_18899052_DGCR6_NM_+	chr22|DGCR6_NM	+
chr22	19430669	19430732	mpeak_332	chr22_19429217_19435755_C22orf39_NM_-	chr22|C22orf39_NM	-
chr22	21198076	21198156	mpeak_333	chr22_21062386_21213100_PI4KA_NM_-	chr22|PI4KA_NM	-
chr22	23634721	23634818	mpeak_334	chr22_23522551_23657619_BCR_NM_+	chr22|BCR_NM	+
chr22	29120943	29121098	mpeak_335	chr22_29083974_29137822_CHEK2_NM_-	chr22|CHEK2_NM	-
chr22	29147090	29147175	mpeak_336	chr22_29138042_29153065_HSCB_NM_+	chr22|HSCB_NM	+
chr22	33895931	33895990	mpeak_337	chr22_33670610_34316416_LARGE_NM_-	chr22|LARGE_NM	-
chr22	34143359	34143495	mpeak_338	chr22_33670610_34316416_LARGE_NM_-	chr22|LARGE_NM	-
chr22	38156062	38156361	mpeak_339	chr22_38092994_38169789_TRIOBP_NM_+	chr22|TRIOBP_NM	+
chr22	42072971	42073165	mpeak_340	chr22_42071199_42084913_NHP2L1_NM_-	chr22|NHP2L1_NM	-
chr22	46705001	46705142	mpeak_341	chr22_46692637_46725943_GTSE1_NM_+	chr22|GTSE1_NM	+
chr22	50197847	50197904	mpeak_342	chr22_50168064_50221196_BRD1_NM_-	chr22|BRD1_NM	-
chr3	10011191	10011325	mpeak_343	chr3_10005881_10028522_EMC3_NM_-	chr3|EMC3_NM	-
chr3	20215787	20215858	mpeak_344	chr3_20212307_20227725_SGOL1_NR_-	chr3|SGOL1_NR	-
chr3	27449326	27449696	mpeak_345	chr3_27418336_27525911_SLC4A7_NM_-	chr3|SLC4A7_NM	-
chr3	32019971	32020021	mpeak_346	chr3_31703608_32023342_OSBPL10_NM_-	chr3|OSBPL10_NM	-
chr3	32597028	32597081	mpeak_347	chr3_32568400_32612366_DYNC1LI1_NM_-	chr3|DYNC1LI1_NM	-
chr3	33125048	33125126	mpeak_348	chr3_33038836_33138694_GLB1_NM_-	chr3|GLB1_NM	-
chr3	39125632	39125696	mpeak_349	chr3_39093476_39136138_WDR48_NM_+	chr3|WDR48_NM	+
chr3	40487997	40488088	mpeak_350	chr3_40434060_40494799_ENTPD3-AS1_NR_-	chr3|ENTPD3-AS1_NR	-
chr3	44667537	44667591	mpeak_351	chr3_44666510_44687982_ZNF197_NM_+	chr3|ZNF197_NM	+
chr3	44686687	44686782	mpeak_352	chr3_44666510_44687982_ZNF197_NM_+	chr3|ZNF197_NM	+
chr3	44889467	44889561	mpeak_353	chr3_44803208_44894164_KIF15_NM_+	chr3|KIF15_NM	+
chr3	47554653	47554712	mpeak_354	chr3_47537687_47555199_ELP6_NM_-	chr3|ELP6_NM	-
chr3	49745346	49745396	mpeak_355	chr3_49726949_49758617_RNF123_NM_+	chr3|RNF123_NM	+
chr3	57904152	57904211	mpeak_356	chr3_57742982_57913022_SLMAP_NM_+	chr3|SLMAP_NM	+
chr3	57909309	57909376	mpeak_357	chr3_57742982_57913022_SLMAP_NM_+	chr3|SLMAP_NM	+
chr3	71743016	71743078	mpeak_358	chr3_71733879_71803924_EIF4E3_NM_-	chr3|EIF4E3_NM	-
chr3	73076859	73076915	mpeak_359	chr3_73046118_73114547_PPP4R2_NM_+	chr3|PPP4R2_NM	+
chr3	121710871	121711051	mpeak_360	chr3_121707255_121741127_ILDR1_NM_-	chr3|ILDR1_NM	-
chr3	126451918	126451976	mpeak_361	chr3_126423062_126679038_CHCHD6_NM_+	chr3|CHCHD6_NM	+
chr3	129828914	129829072	mpeak_362	chr3_129818201_129830276_FAM86HP_NR_-	chr3|FAM86HP_NR	-
chr3	134214126	134214187	mpeak_363	chr3_134204574_134293634_CEP63_NM_+	chr3|CEP63_NM	+
chr3	134251612	134251733	mpeak_364	chr3_134204574_134293634_CEP63_NM_+	chr3|CEP63_NM	+
chr3	134264545	134264666	mpeak_365	chr3_134204574_134293634_CEP63_NM_+	chr3|CEP63_NM	+
chr3	134267890	134268012	mpeak_366	chr3_134204574_134293634_CEP63_NM_+	chr3|CEP63_NM	+
chr3	134283812	134283873	mpeak_367	chr3_134204574_134293634_CEP63_NM_+	chr3|CEP63_NM	+
chr3	134286186	134286260	mpeak_368	chr3_134204574_134293634_CEP63_NM_+	chr3|CEP63_NM	+
chr3	136152389	136152436	mpeak_369	chr3_136057119_136471245_STAG1_NM_-	chr3|STAG1_NM	-
chr3	136236885	136236936	mpeak_370	chr3_136057119_136471245_STAG1_NM_-	chr3|STAG1_NM	-
chr3	142730989	142731205	mpeak_371	chr3_142720371_142775153_U2SURP_NM_+	chr3|U2SURP_NM	+
chr3	168807784	168808010	mpeak_372	chr3_168802831_169381563_MECOM_NM_-	chr3|MECOM_NM	-
chr3	169781760	169781945	mpeak_373	chr3_169755734_169801692_GPR160_NM_+	chr3|GPR160_NM	+
chr3	169831143	169831259	mpeak_374	chr3_169815172_169899537_PHC3_NM_-	chr3|PHC3_NM	-
chr3	184533555	184533741	mpeak_375	chr3_184529930_184769663_VPS8_NM_+	chr3|VPS8_NM	+
chr3	185242416	185242469	mpeak_376	chr3_185226665_185270369_LIPH_NM_-	chr3|LIPH_NM	-
chr3	193376731	193376792	mpeak_377	chr3_193310932_193412394_OPA1_NM_+	chr3|OPA1_NM	+
chr3	194379678	194379817	mpeak_378	chr3_194362976_194393206_LSG1_NM_-	chr3|LSG1_NM	-
chr3	196633744	196633874	mpeak_379	chr3_196594726_196657683_SENP5_NM_+	chr3|SENP5_NM	+
chr3	196668572	196668853	mpeak_380	chr3_196663953_196669464_NCBP2_NM_-	chr3|NCBP2_NM	-
chr3	196864078	196864152	mpeak_381	chr3_196771600_197026143_DLG1_NM_-	chr3|DLG1_NM	-
chr4	1345497	1345590	mpeak_382	chr4_1341103_1379655_UVSSA_NM_+	chr4|UVSSA_NM	+
chr4	7005516	7005636	mpeak_383	chr4_6911170_7032053_TBC1D14_NM_+	chr4|TBC1D14_NM	+
chr4	8395262	8395314	mpeak_384	chr4_8368807_8442452_ACOX3_NM_-	chr4|ACOX3_NM	-
chr4	20307443	20307495	mpeak_385	chr4_20255186_20620390_SLIT2_NM_+	chr4|SLIT2_NM	+
chr4	24541459	24541582	mpeak_386	chr4_24529664_24586184_DHX15_NM_-	chr4|DHX15_NM	-
chr4	40103691	40103807	mpeak_387	chr4_40058523_40155811_N4BP2_NM_+	chr4|N4BP2_NM	+
chr4	42450595	42450645	mpeak_388	chr4_42415030_42659122_ATP8A1_NM_-	chr4|ATP8A1_NM	-
chr4	57266118	57266241	mpeak_389	chr4_57261714_57301802_PPAT_NM_-	chr4|PPAT_NM	-
chr4	69188116	69188591	mpeak_390	chr4_69180041_69215824_YTHDC1_NM_-	chr4|YTHDC1_NM	-
chr4	69199020	69199192	mpeak_391	chr4_69180041_69215824_YTHDC1_NM_-	chr4|YTHDC1_NM	-
chr4	75314755	75314972	mpeak_392	chr4_75310814_75320475_AREG_NM_+	chr4|AREG_NM	+
chr4	76721567	76721628	mpeak_393	chr4_76649705_76734358_USO1_NM_+	chr4|USO1_NM	+
chr4	76838270	76838322	mpeak_394	chr4_76832506_76862166_NAAA_NM_-	chr4|NAAA_NM	-
chr4	100001131	100001265	mpeak_395	chr4_99993592_100009939_ADH5_NM_-	chr4|ADH5_NM	-
chr4	107157537	107157589	mpeak_396	chr4_106967837_107237861_TBCK_NM_-	chr4|TBCK_NM	-
chr4	142950098	142950249	mpeak_397	chr4_142950067_143767604_INPP4B_NM_-	chr4|INPP4B_NM	-
chr4	143094463	143094514	mpeak_398	chr4_142950067_143767604_INPP4B_NM_-	chr4|INPP4B_NM	-
chr4	156644520	156644625	mpeak_399	chr4_156587861_156651181_GUCY1A3_NM_+	chr4|GUCY1A3_NM	+
chr5	10285017	10285175	mpeak_400	chr5_10280744_10308168_CMBL_NM_-	chr5|CMBL_NM	-
chr5	10285729	10285878	mpeak_401	chr5_10280744_10308168_CMBL_NM_-	chr5|CMBL_NM	-
chr5	16478954	16479051	mpeak_402	chr5_16475343_16617167_FAM134B_NM_-	chr5|FAM134B_NM	-
chr5	34952239	34952425	mpeak_403	chr5_34929697_34954657_DNAJC21_NM_+	chr5|DNAJC21_NM	+
chr5	34954556	34954617	mpeak_404	chr5_34929697_34954657_DNAJC21_NM_+	chr5|DNAJC21_NM	+
chr5	36136401	36136558	mpeak_405	chr5_36104208_36152015_LMBRD2_NM_-	chr5|LMBRD2_NM	-
chr5	37044791	37044839	mpeak_406	chr5_36876860_37063891_NIPBL_NM_+	chr5|NIPBL_NM	+
chr5	41762200	41762251	mpeak_407	chr5_41731872_41870791_OXCT1_NM_-	chr5|OXCT1_NM	-
chr5	43016110	43016235	mpeak_408	chr5_43015252_43067541_LOC648987_NR_-	chr5|LOC648987_NR	-
chr5	52397919	52397970	mpeak_409	chr5_52394497_52405602_MOCS2_NM_-	chr5|MOCS2_NM	-
chr5	68599707	68599765	mpeak_410	chr5_68578861_68628620_CCDC125_NM_-	chr5|CCDC125_NM	-
chr5	76737763	76737855	mpeak_411	chr5_76729112_76788332_WDR41_NM_-	chr5|WDR41_NM	-
chr5	77339249	77339320	mpeak_412	chr5_77298879_77590579_AP3B1_NM_-	chr5|AP3B1_NM	-
chr5	77411945	77412010	mpeak_413	chr5_77298879_77590579_AP3B1_NM_-	chr5|AP3B1_NM	-
chr5	79952231	79952354	mpeak_414	chr5_79950466_80171569_MSH3_NM_+	chr5|MSH3_NM	+
chr5	89695105	89695304	mpeak_415	chr5_89689924_89705603_CETN3_NM_-	chr5|CETN3_NM	-
chr5	100238393	100238444	mpeak_416	chr5_100147833_100238989_ST8SIA4_NM_-	chr5|ST8SIA4_NM	-
chr5	102484850	102484941	mpeak_417	chr5_102455957_102537222_PPIP5K2_NM_+	chr5|PPIP5K2_NM	+
chr5	112204039	112204093	mpeak_418	chr5_112196884_112227299_SRP19_NM_+	chr5|SRP19_NM	+
chr5	121297718	121297768	mpeak_419	chr5_121297655_121362636_SRFBP1_NM_+	chr5|SRFBP1_NM	+
chr5	128869039	128869096	mpeak_420	chr5_128796102_129072759_ADAMTS19_NM_+	chr5|ADAMTS19_NM	+
chr5	130651665	130651799	mpeak_421	chr5_130599701_130727610_CDC42SE2_NM_+	chr5|CDC42SE2_NM	+
chr5	134259469	134260555	mpeak_422	chr5_134240809_134296275_PCBD2_NM_+	chr5|PCBD2_NM	+
chr5	137896183	137896318	mpeak_423	chr5_137891803_137911318_HSPA9_NM_-	chr5|HSPA9_NM	-
chr5	141314145	141314219	mpeak_424	chr5_141303384_141318085_KIAA0141_NM_+	chr5|KIAA0141_NM	+
chr5	145828044	145828163	mpeak_425	chr5_145826872_145890003_TCERG1_NM_+	chr5|TCERG1_NM	+
chr5	179313952	179314096	mpeak_426	chr5_179291128_179334856_TBC1D9B_NM_-	chr5|TBC1D9B_NM	-
chr5	179314416	179314597	mpeak_427	chr5_179291128_179334856_TBC1D9B_NM_-	chr5|TBC1D9B_NM	-
chr6	2902924	2902982	mpeak_428	chr6_2890804_2903546_SERPINB9_NM_-	chr6|SERPINB9_NM	-
chr6	3082044	3082234	mpeak_429	chr6_3077057_3113286_RIPK1_NM_+	chr6|RIPK1_NM	+
chr6	20552754	20552811	mpeak_430	chr6_20534687_21231078_CDKAL1_NM_+	chr6|CDKAL1_NM	+
chr6	30035471	30035739	mpeak_431	chr6_30034931_30036880_PPP1R11_NM_+	chr6|PPP1R11_NM	+
chr6	30682823	30682968	mpeak_432	chr6_30668409_30685458_MDC1_NM_-	chr6|MDC1_NM	-
chr6	30689598	30689652	mpeak_433	chr6_30687977_30691715_TUBB_NR_+	chr6|TUBB_NR	+
chr6	33260591	33260757	mpeak_434	chr6_33260090_33267165_RGL2_NM_-	chr6|RGL2_NM	-
chr6	35449201	35449254	mpeak_435	chr6_35442934_35464861_TEAD3_NM_-	chr6|TEAD3_NM	-
chr6	35547847	35548010	mpeak_436	chr6_35543719_35696360_FKBP5_NM_-	chr6|FKBP5_NM	-
chr6	107361499	107361558	mpeak_437	chr6_107349375_107372260_C6orf203_NM_+	chr6|C6orf203_NM	+
chr6	144178493	144178590	mpeak_438	chr6_144164507_144184553_LTV1_NM_+	chr6|LTV1_NM	+
chr6	144768410	144768461	mpeak_439	chr6_144612872_145172124_UTRN_NM_+	chr6|UTRN_NM	+
chr6	151256002	151256056	mpeak_440	chr6_151186814_151422661_MTHFD1L_NM_+	chr6|MTHFD1L_NM	+
chr6	151256777	151256886	mpeak_441	chr6_151186814_151422661_MTHFD1L_NM_+	chr6|MTHFD1L_NM	+
chr6	167413531	167413590	mpeak_442	chr6_167412804_167453391_FGFR1OP_NM_+	chr6|FGFR1OP_NM	+
chr7	2239142	2239196	mpeak_443	chr7_1855864_2272583_MAD1L1_NM_-	chr7|MAD1L1_NM	-
chr7	16642017	16642139	mpeak_444	chr7_16640570_16685442_ANKMY2_NM_-	chr7|ANKMY2_NM	-
chr7	23561782	23562063	mpeak_445	chr7_23545188_23571660_TRA2A_NM_-	chr7|TRA2A_NM	-
chr7	30124210	30124336	mpeak_446	chr7_30067976_30157585_PLEKHA8_NM_+	chr7|PLEKHA8_NM	+
chr7	43843334	43843457	mpeak_447	chr7_43798271_43846575_BLVRA_NM_+	chr7|BLVRA_NM	+
chr7	44529506	44529566	mpeak_448	chr7_44425720_44530385_NUDCD3_NM_-	chr7|NUDCD3_NM	-
chr7	64460306	64460356	mpeak_449	chr7_64453792_64467124_ERV3-1_NM_-	chr7|ERV3-1_NM	-
chr7	73917283	73917335	mpeak_450	chr7_73868119_74016691_GTF2IRD1_NM_+	chr7|GTF2IRD1_NM	+
chr7	91978253	91978588	mpeak_451	chr7_91875547_92027525_ANKIB1_NM_+	chr7|ANKIB1_NM	+
chr7	94285296	94285349	mpeak_452	chr7_94214827_94285521_SGCE_NM_-	chr7|SGCE_NM	-
chr7	99498041	99498233	mpeak_453	chr7_99490369_99517223_TRIM4_NM_-	chr7|TRIM4_NM	-
chr7	99932289	99932416	mpeak_454	chr7_99918707_99933930_PMS2P1_NR_-	chr7|PMS2P1_NR	-
chr7	101901394	101901518	mpeak_455	chr7_101459183_101926312_CUX1_NM_+	chr7|CUX1_NM	+
chr7	107819415	107819491	mpeak_456	chr7_107790592_108096841_NRCAM_NM_-	chr7|NRCAM_NM	-
chr7	134347787	134347960	mpeak_457	chr7_134331530_134363604_BPGM_NM_+	chr7|BPGM_NM	+
chr7	140097009	140097062	mpeak_458	chr7_140035304_140098350_SLC37A3_NM_-	chr7|SLC37A3_NM	-
chr8	6262832	6262985	mpeak_459	chr8_6262641_6264069_LOC100287015_NR_-	chr8|LOC100287015_NR	-
chr8	6263116	6263176	mpeak_460	chr8_6262641_6264069_LOC100287015_NR_-	chr8|LOC100287015_NR	-
chr8	17813340	17813420	mpeak_461	chr8_17780365_17885145_PCM1_NM_+	chr8|PCM1_NM	+
chr8	23085789	23085847	mpeak_462	chr8_23082733_23087460_LOC389641_NR_+	chr8|LOC389641_NR	+
chr8	23188124	23188174	mpeak_463	chr8_23155635_23261722_LOXL2_NM_-	chr8|LOXL2_NM	-
chr8	25180936	25180988	mpeak_464	chr8_25042286_25268709_DOCK5_NM_+	chr8|DOCK5_NM	+
chr8	28839539	28839592	mpeak_465	chr8_28747910_28908534_HMBOX1_NM_+	chr8|HMBOX1_NM	+
chr8	30250261	30250410	mpeak_466	chr8_30242016_30428153_RBPMS_NM_+	chr8|RBPMS_NM	+
chr8	37994079	37994130	mpeak_467	chr8_37963010_37996481_ASH2L_NM_+	chr8|ASH2L_NM	+
chr8	42021847	42021982	mpeak_468	chr8_42010463_42026478_AP3M2_NM_+	chr8|AP3M2_NM	+
chr8	42384499	42384616	mpeak_469	chr8_42275485_42397356_SLC20A2_NM_-	chr8|SLC20A2_NM	-
chr8	71570046	71570127	mpeak_470	chr8_71550138_71581447_LACTB2_NM_-	chr8|LACTB2_NM	-
chr8	74439075	74439164	mpeak_471	chr8_74333700_74659943_STAU2_NM_-	chr8|STAU2_NM	-
chr8	74461755	74461919	mpeak_472	chr8_74333700_74659943_STAU2_NM_-	chr8|STAU2_NM	-
chr8	86053709	86053770	mpeak_473	chr8_86019322_86057623_LRRCC1_NM_+	chr8|LRRCC1_NM	+
chr8	90733135	90733281	mpeak_474	chr8_90729956_90769939_LOC101929709_NR_-	chr8|LOC101929709_NR	-
chr8	96063880	96063944	mpeak_475	chr8_96037213_96070036_NDUFAF6_NM_+	chr8|NDUFAF6_NM	+
chr8	99591598	99591662	mpeak_476	chr8_99468228_99954799_STK3_NM_-	chr8|STK3_NM	-
chr8	103289266	103289435	mpeak_477	chr8_103266742_103424917_UBR5_NM_-	chr8|UBR5_NM	-
chr8	126093953	126094010	mpeak_478	chr8_126036915_126104061_KIAA0196_NM_-	chr8|KIAA0196_NM	-
chr8	128909561	128909728	mpeak_479	chr8_128902873_129113225_PVT1_NR_+	chr8|PVT1_NR	+
chr8	128910394	128910578	mpeak_480	chr8_128902873_129113225_PVT1_NR_+	chr8|PVT1_NR	+
chr8	145621912	145621962	mpeak_481	chr8_145618580_145634733_CPSF1_NM_-	chr8|CPSF1_NM	-
chr8	145676497	145676562	mpeak_482	chr8_145676153_145691031_CYHR1_NM_-	chr8|CYHR1_NM	-
chr9	26887301	26887443	mpeak_483	chr9_26842645_26892826_CAAP1_NM_-	chr9|CAAP1_NM	-
chr9	27016902	27017059	mpeak_484	chr9_26947036_27062615_IFT74_NM_+	chr9|IFT74_NM	+
chr9	33321025	33321084	mpeak_485	chr9_33290417_33369903_NFX1_NM_+	chr9|NFX1_NM	+
chr9	33348666	33348734	mpeak_486	chr9_33290417_33369903_NFX1_NM_+	chr9|NFX1_NM	+
chr9	37881884	37881996	mpeak_487	chr9_37880745_37904350_SLC25A51_NR_-	chr9|SLC25A51_NR	-
chr9	37882471	37882552	mpeak_488	chr9_37880745_37904350_SLC25A51_NR_-	chr9|SLC25A51_NR	-
chr9	37884018	37884075	mpeak_489	chr9_37880745_37904350_SLC25A51_NR_-	chr9|SLC25A51_NR	-
chr9	68454142	68454253	mpeak_490	chr9_68427894_68454375_LOC642236_NR_-	chr9|LOC642236_NR	-
chr9	79997935	79997986	mpeak_491	chr9_79792360_80030871_VPS13A_NM_+	chr9|VPS13A_NM	+
chr9	88956454	88956582	mpeak_492	chr9_88903659_88969402_ZCCHC6_NM_-	chr9|ZCCHC6_NM	-
chr9	94055420	94055487	mpeak_493	chr9_93976707_94124251_AUH_NM_-	chr9|AUH_NM	-
chr9	95198096	95198164	mpeak_494	chr9_95087749_95375300_CENPP_NM_+	chr9|CENPP_NM	+
chr9	96071426	96071482	mpeak_495	chr9_95947211_96082648_WNK2_NM_+	chr9|WNK2_NM	+
chr9	98769027	98769123	mpeak_496	chr9_98637899_98774506_ERCC6L2_NM_+	chr9|ERCC6L2_NM	+
chr9	101543579	101543629	mpeak_497	chr9_101498905_101558794_ANKS6_NM_-	chr9|ANKS6_NM	-
chr9	103103819	103103879	mpeak_498	chr9_103064586_103115259_TEX10_NM_-	chr9|TEX10_NM	-
chr9	115392062	115392127	mpeak_499	chr9_115249247_115421542_KIAA1958_NM_+	chr9|KIAA1958_NM	+
chr9	115938807	115938963	mpeak_500	chr9_115928435_115983641_FKBP15_NM_-	chr9|FKBP15_NM	-
chr9	116355157	116355298	mpeak_501	chr9_116207008_116359047_RGS3_NM_+	chr9|RGS3_NM	+
chr9	132266659	132266827	mpeak_502	chr9_132250938_132275697_LINC00963_NR_+	chr9|LINC00963_NR	+
chr9	132271480	132271582	mpeak_503	chr9_132250938_132275697_LINC00963_NR_+	chr9|LINC00963_NR	+
chr9	132568348	132568520	mpeak_504	chr9_132565431_132571620_TOR1B_NM_+	chr9|TOR1B_NM	+
chr9	132657538	132657695	mpeak_505	chr9_132652825_132805473_FNBP1_NM_-	chr9|FNBP1_NM	-
chr9	139301587	139301648	mpeak_506	chr9_139297339_139305054_SDCCAG3_NM_-	chr9|SDCCAG3_NM	-
chr9	139331778	139331832	mpeak_507	chr9_139324259_139334256_INPP5E_NM_-	chr9|INPP5E_NM	-
chr9	140697596	140697712	mpeak_508	chr9_140513443_140729224_EHMT1_NM_+	chr9|EHMT1_NM	+
chrX	1544123	1544177	mpeak_509	chrX_1522382_1572655_ASMTL_NM_-	chrX|ASMTL_NM	-
chrX	14881103	14881235	mpeak_510	chrX_14862103_14891184_FANCB_NM_-	chrX|FANCB_NM	-
chrX	23725945	23726039	mpeak_511	chrX_23722099_23761407_ACOT9_NM_-	chrX|ACOT9_NM	-
chrX	46584911	46584980	mpeak_512	chrX_46466638_46618607_SLC9A7_NM_-	chrX|SLC9A7_NM	-
chrX	110984827	110984886	mpeak_513	chrX_110924345_111002961_ALG13_NM_+	chrX|ALG13_NM	+
chrX	129041335	129041410	mpeak_514	chrX_129040096_129063311_UTP14A_NM_+	chrX|UTP14A_NM	+
chrX	133764179	133764231	mpeak_515	chrX_133700770_133792513_PLAC1_NM_-	chrX|PLAC1_NM	-
chrX	134477177	134477252	mpeak_516	chrX_134421778_134478012_ZNF75D_NM_-	chrX|ZNF75D_NM	-
