# Supplementary material for: Compartment-specific and ELAVL1-coordinated regulation of intronic polyadenylation isoforms by doxorubicin
Source: HighWire-hosted journal article supplement (doi:10.1101/gr.276192.121), 2022-07-01
Supplement: Supplemental_Table_S9.xlsx.xlsx [file Supplemental_Table_S9.xlsx.xlsx]

## Sheet: Sheet1
Supplemental Table S9 : List of IPA isoforms regulated by 18-hour doxorubicin in polysomes of MCF-7 cells by 3’-seq analysis.
IPA peaks	baseMean	log2FoldChange IPA:LE	lfcSE	stat	pvalue	padj	8	17	29	6	15	27	LE,08	LE,17	LE,29	LE,06	LE,15	LE,27	%IPA (+doxo)	%IPA (-doxo)	log2FC_IPA	log2FC_LE	log2FC IPA-logFC LE	gene	Tian polyA site	Zavolan polyA site	refSeqCDS
chr15:52098651-52098721:mpeak_28131|chr15_52043757_52100616_TMOD2_NM_+|	21,26	30,00	6,01	-4,99	6,06E-07	9,97E-05	0	0	232	0	0	0	0	0	0	1	13	9	#DIV/0!	#DIV/0!	Inf	-Inf	Inf	TMOD2	-	-	uc002abk.3:52058638:52100651:+;uc002abl.4:52058638:52100651:+;uc010bfb.3:52060464:52100651:+
chr1:35652051-35652106:mpeak_1812|chr1_35650194_35658743_SFPQ_NM_-|	1916,40	26,89	3,33	-8,08	6,40E-16	9,21E-13	0	0	5334	0	0	0	1084	684	9646	2002	1375	2871	140	#DIV/0!	Inf	0,87	Inf	SFPQ	-	-	uc001bys.3:35650056:35658650:-
chr10:118783418-118783471:mpeak_12145|chr10_118646077_118886097_SHTN1_NM_-|	69,48	25,97	2,99	-8,68	3,80E-18	2,19E-14	1	0	619	0	0	0	49	6	6	34	66	53	1528	#DIV/0!	Inf	-1,33	Inf	SHTN1	-	-	-
chr10:125847092-125847149:mpeak_12345|chr10_125769855_125853123_CHST15_NM_-|	53,18	25,82	3,06	-8,43	3,53E-17	6,78E-14	0	0	475	0	0	0	4	17	22	46	43	31	3304	#DIV/0!	Inf	-1,47	Inf	CHST15	-	-	-
chr21:44522038-44522190:mpeak_53385|chr21_44513359_44527688_U2AF1_NM_-|	1386,25	25,45	3,00	-8,49	2,13E-17	6,13E-14	0	0	481	0	0	0	2002	2473	702	3223	3079	4675	28	#DIV/0!	Inf	-1,08	Inf	U2AF1	-	-	uc002zdc.1:44521389:44527604:-;uc002zda.1:44513211:44527604:-;uc002zdb.1:44513211:44527604:-;uc010gpi.1:44514576:44527604:-
chr11:43740689-43740744:mpeak_13797|chr11_43702142_43876693_HSD17B12_NM_+|	198,27	25,05	4,94	-5,07	3,99E-07	6,75E-05	0	0	1708	0	0	0	275	192	0	58	83	64	732	#DIV/0!	Inf	1,19	Inf	HSD17B12	-	chr11_43719196_+	uc001mxq.4:43702377:43876798:+
chrX:70766434-70766494:mpeak_86489|chrX_70752911_70793469_OGT_NM_+|	134,61	24,68	3,07	-8,04	9,01E-16	1,04E-12	0	0	752	0	0	0	51	252	182	140	130	108	465	#DIV/0!	Inf	0,36	Inf	OGT	-	chrX_71546706_+	uc004eaa.2:70753149:70793644:+;uc004eab.2:70753149:70793644:+
chr19:5255735-5255792:mpeak_40257|chr19_5206853_5340814_PTPRS_NM_-|	102,68	24,59	3,27	-7,52	5,30E-14	2,54E-11	0	0	370	0	0	0	147	202	0	165	128	221	213	#DIV/0!	Inf	-0,56	Inf	PTPRS	-	-	uc002mbu.1:5159109:5286151:-;uc010xin.2:5206784:5286151:-;uc002mbv.3:5206784:5286151:-;uc002mbw.3:5206784:5286151:-;uc002mbx.3:5206784:5286151:-;uc002mby.3:5206784:5286151:-
chr3:148799410-148799476:mpeak_59240|chr3_148750159_148804341_HLTF_NM_-|	100,26	24,51	3,16	-7,76	8,22E-15	5,06E-12	0	0	652	0	0	0	175	125	6	111	81	54	642	#DIV/0!	Inf	0,31	Inf	HLTF	chr3:148799411:-	-	uc003ewq.1:148750006:148804123:-;uc003ewr.1:148750006:148804123:-;uc003ews.1:148750006:148804123:-;uc010hve.1:148750006:148804123:-
chr3:127494445-127494504:mpeak_58550|chr3_127411166_127542093_MGLL_NM_-|	136,27	24,38	4,75	-5,13	2,88E-07	5,02E-05	0	0	608	0	0	0	242	338	0	129	132	187	210	#DIV/0!	Inf	0,37	Inf	MGLL	-	-	uc003ejw.4:127411040:127541161:-;uc011bko.3:127411040:127541161:-;uc003ejx.4:127411040:127540661:-;uc010hsp.2:127434464:127540661:-
chr16:54088586-54088703:mpeak_32032|chr16_53737874_54145673_FTO_NM_+|	49,53	24,17	3,25	-7,44	1,00E-13	3,85E-11	0	0	415	0	0	0	22	66	0	23	28	40	940	#DIV/0!	Inf	-0,05	Inf	FTO	-	chr16_54054836_+	uc002ehr.3:53738096:54145827:+;uc010vha.2:53878203:54145827:+;uc010cbz.3:53922821:54145827:+
chr16:53983446-53983497:mpeak_32028|chr16_53737874_54145673_FTO_NM_+|	47,23	24,13	3,24	-7,44	9,84E-14	3,85E-11	0	0	387	0	0	0	22	66	0	23	28	40	877	#DIV/0!	Inf	-0,05	Inf	FTO	-	-	uc002ehr.3:53738096:54145827:+;uc010vha.2:53878203:54145827:+;uc010cbz.3:53922821:54145827:+
chr20:2447780-2447832:mpeak_50374|chr20_2442585_2451499_SNRPB_NM_-mpeak_50374|chr20_2442585_2451499_SNRPB_NM_-||	709,53	23,96	3,20	-7,48	7,24E-14	3,21E-11	0	0	459	0	0	0	1640	2967	11	850	1229	1358	30	#DIV/0!	Inf	0,43	Inf	SNRPB	-	-	uc002wga.1:2442574:2451336:-;uc002wfz.1:2442401:2451336:-;uc002wgb.3:2443261:2451336:-
chr1:43852284-43852352:mpeak_2287|chr1_43850777_43855483_MED8_NM_-|	94,62	23,81	3,00	-7,94	2,04E-15	1,95E-12	0	0	348	0	0	0	47	260	88	109	150	133	264	#DIV/0!	Inf	0,01	Inf	MED8	-	chr1_43386626_-	uc001cje.2:43850120:43855435:-;uc001cjf.5:43850712:43853176:-;uc001cjg.5:43850712:43855435:-
chr8:119099276-119099332:mpeak_80668|chr8_118812136_119124058_EXT1_NM_-|	327,48	23,78	3,31	-7,18	6,91E-13	1,89E-10	0	0	2935	0	0	0	9	589	304	34	33	25	976	#DIV/0!	Inf	3,29	Inf	EXT1	-	-	uc003yok.1:118811950:119123285:-
chr5:60377146-60377196:mpeak_65498|chr5_60240955_60448530_NDUFAF2_NM_+|	61,24	23,35	3,01	-7,76	8,78E-15	5,06E-12	0	0	359	0	0	0	131	79	22	47	48	49	465	#DIV/0!	Inf	0,69	Inf	NDUFAF2	-	-	uc003jsp.4:60241082:60448782:+
chr1:44977132-44977247:mpeak_2349|chr1_44870959_45116375_RNF220_NM_+|	733,75	23,19	3,41	-6,80	1,08E-11	2,38E-09	0	0	2487	0	0	0	12	446	5406	130	126	197	127	#DIV/0!	Inf	3,69	Inf	RNF220	-	-	uc001clv.1:44877769:45116447:+;uc001clw.1:44877769:45116447:+
chr6:86346927-86346980:mpeak_71774|chr6_86322641_86353043_SYNCRIP_NM_-|	682,26	22,75	3,10	-7,35	2,02E-13	6,47E-11	0	0	647	0	0	0	460	790	4953	451	496	390	31	#DIV/0!	Inf	2,21	Inf	SYNCRIP	-	-	uc003pku.3:86322599:86351157:-;uc003pkv.3:86322599:86351157:-;uc003pkw.3:86322599:86351157:-;uc003pky.3:86322599:86350019:-;uc003pkx.3:86322599:86347019:-;uc003pkz.2:86324473:86351157:-;uc003pla.2:86324473:86351157:-
chr12:890370-890422:mpeak_17069|chr12_862088_1017640_WNK1_NM_+|	639,63	22,72	3,12	-7,29	3,12E-13	8,98E-11	0	0	746	0	0	0	397	739	4721	328	418	326	38	#DIV/0!	Inf	2,45	Inf	WNK1	-	-	uc021qss.1:862731:1017958:+;uc001qio.4:862731:1017958:+;uc021qst.1:862731:1017958:+;uc001qip.4:862731:1017958:+;uc031qfk.1:862731:1017958:+;uc001qin.3:862731:936457:+
chr5:179045643-179045704:mpeak_68896|chr5_179041960_179050722_HNRNPH1_NM_-mpeak_68896|chr5_179041960_179050722_HNRNPH1_NM_-||	2209,66	22,69	3,17	-7,15	8,66E-13	2,27E-10	0	0	973	0	0	0	1967	1079	18954	999	1402	1142	13	#DIV/0!	Inf	2,63	Inf	HNRNPH1	-	-	uc021yjd.1:179041841:179050134:-;uc003mkf.5:179042546:179050134:-;uc003mkg.5:179042546:179048013:-;uc003mke.4:179042546:179050134:-;uc003mkh.4:179042546:179050134:-
chr17:44159790-44159866:mpeak_36207|chr17_44109069_44302740_KANSL1_NM_-|	159,15	22,26	3,03	-7,34	2,14E-13	6,50E-11	0	1	564	0	0	0	7	131	1006	61	68	71	74	#DIV/0!	Inf	2,51	Inf	KANSL1	-	-	uc002ikc.3:44108841:44249509:-;uc002ikd.3:44108841:44249509:-;uc010dav.3:44108841:44249509:-
chr6:42336154-42336207:mpeak_70846|chr6_42196407_42419789_TRERF1_NM_-|	54,00	21,72	3,18	-6,82	8,91E-12	2,05E-09	0	0	426	0	0	0	10	5	177	9	13	8	664	#DIV/0!	Inf	2,68	Inf	TRERF1	-	-	-
chr4:7774037-7774374:mpeak_61188|chr4_7765518_7941653_AFAP1_NM_-|	35,78	21,39	2,71	-7,88	3,25E-15	2,67E-12	0	92	0	0	0	0	16	92	111	49	37	33	127	#DIV/0!	Inf	0,88	Inf	AFAP1	chr4:7774314:-	-	uc011bwk.1:7765491:7873805:-;uc003gkg.1:7765491:7873805:-
chr1:44966965-44967020:mpeak_2348|chr1_44870959_45116375_RNF220_NM_+|	576,67	21,25	3,29	-6,46	1,03E-10	1,97E-08	0	0	603	0	0	0	12	446	5406	130	126	197	31	#DIV/0!	Inf	3,69	Inf	RNF220	-	-	uc001clv.1:44877769:45116447:+;uc001clw.1:44877769:45116447:+
chr6:15401208-15401287:mpeak_69477|chr6_15246205_15520299_JARID2_NM_+|	494,01	21,24	3,18	-6,67	2,54E-11	5,23E-09	0	0	354	0	0	0	42	269	4632	197	229	206	21	#DIV/0!	Inf	2,97	Inf	JARID2	-	-	uc003nbj.4:15246770:15520482:+;uc011diw.1:15401181:15509345:+
chr13:97463603-97463660:mpeak_23451|chr13_96743092_97484743_HS6ST3_NM_+|	105,17	21,21	3,34	-6,35	2,10E-10	3,78E-08	0	0	392	0	0	0	44	1	735	25	22	42	151	#DIV/0!	Inf	3,12	Inf	HS6ST3	-	-	uc001vmw.4:96743116:97485452:+
chr17:40561871-40561969:mpeak_35857|chr17_40557406_40575338_PTRF_NM_-|	1043,23	18,38	2,88	-6,39	1,67E-10	3,10E-08	0	106	0	0	0	0	273	10960	591	181	176	232	3	#DIV/0!	Inf	4,33	Inf	PTRF	chr17:40561869:-;chr17:40561915:-;chr17:40561950:-	chr17_42409899_-	uc010wgi.2:40556704:40575115:-;uc002hzo.3:40556704:40575115:-
chr1:52903888-52903965:mpeak_2667|chr1_52889674_53018762_ZCCHC11_NM_-|	273,23	15,80	5,96	-2,65	8,04E-03	2,96E-01	0	71	1271	0	0	0	0	29	1907	0	1	0	69	#DIV/0!	Inf	10,72	Inf	ZCCHC11	-	chr1_52438225_-	uc001cty.2:52889606:52991952:-;uc001ctx.2:52889606:52991952:-
chr11:123480578-123480630:mpeak_16746|chr11_123396343_123493213_GRAMD1B_NM_+|	299,17	13,92	5,91	-2,35	1,86E-02	4,43E-01	0	0	122	0	0	0	0	119	3344	5	0	0	7	#DIV/0!	Inf	9,33	Inf	GRAMD1B	-	-	uc001pyy.2:123479209:123493303:+;uc010rzw.2:123448171:123490079:+;uc001pyx.2:123396856:123493303:+;uc001pyw.2:123396856:123493303:+;uc010rzx.1:123448171:123493303:+
chr17:58468869-58468923:mpeak_37065|chr17_58256789_58469586_USP32_NM_-|	124,23	11,33	3,04	-3,73	1,88E-04	2,85E-02	0	0	221	0	0	0	169	74	6	272	487	262	266	#DIV/0!	Inf	-2,03	Inf	USP32	-	-	uc002iyo.1:58256615:58469300:-;uc010wov.1:58327077:58469300:-
chr22:38885124-38885363:mpeak_54681|chr22_38882445_38902345_DDX17_NM_-|	453,40	11,03	2,86	-3,85	1,18E-04	1,84E-02	0	2	321	0	0	0	376	1171	28	957	1059	1530	31	#DIV/0!	Inf	-1,17	Inf	DDX17	-	chr22_38489185_-	uc003avy.4:38881939:38902242:-;uc003avx.4:38881939:38902242:-
chr7:101463968-101464035:mpeak_76443|chr7_101459183_101926312_CUX1_NM_+|	115,53	10,84	3,14	-3,46	5,50E-04	6,74E-02	5	0	741	0	0	0	315	31	0	85	88	121	215	#DIV/0!	Inf	0,23	Inf	CUX1	-	-	uc003uys.4:101459310:101892322:+;uc003uyt.3:101459310:101926382:+;uc003uyu.3:101459310:101926382:+;uc011kkn.2:101459310:101926382:+;uc003uyw.3:101459310:101926382:+;uc003uyv.3:101459310:101926382:+;uc003uyx.4:101460919:101892322:+
chr3:170945949-170946010:mpeak_59800|chr3_170781753_171178197_TNIK_NM_-|	40,97	10,61	3,16	-3,35	8,00E-04	9,03E-02	0	0	475	0	1	2	0	1	0	4	5	4	44815	29	7,61	-3,59	11,20	TNIK	-	-	uc003fhh.2:170781669:171177852:-;uc003fhi.2:170781669:171177852:-;uc003fhj.2:170781669:171177852:-;uc003fhk.2:170781669:171177852:-;uc003fhl.2:170781669:171177852:-;uc003fhm.2:170781669:171177852:-;uc003fhn.2:170781669:171177852:-;uc003fho.2:170781669:171177852:-
chr8:116507475-116507531:mpeak_80590|chr8_116427312_116681255_TRPS1_NM_-|	494,51	10,60	2,86	-3,71	2,08E-04	3,06E-02	0	0	122	0	0	0	647	125	282	1166	2288	1304	35	#DIV/0!	Inf	-2,17	Inf	TRPS1	-	-	uc011lhy.2:116426250:116680110:-;uc003yny.3:116426250:116635864:-;uc003ynz.3:116426250:116632285:-;uc010mcy.3:116426250:116632285:-
chr7:8245887-8245943:mpeak_74173|chr7_8153674_8302242_ICA1_NM_-|	87,82	10,49	2,94	-3,57	3,62E-04	4,85E-02	0	1	724	1	0	0	96	4	33	41	52	102	818	1	9,65	-0,56	10,21	ICA1	-	-	uc010ktr.3:8153552:8275556:-;uc003srm.3:8153552:8275556:-;uc003sro.5:8153552:8275556:-;uc003srn.5:8153552:8267301:-;uc003srq.4:8153552:8275556:-;uc003srr.4:8153552:8275556:-;uc003srs.2:8196586:8275556:-
chr12:80033601-80033667:mpeak_20041|chr12_79986473_80084790_PAWR_NM_-|	47,65	10,22	3,07	-3,33	8,75E-04	9,56E-02	0	0	105	0	0	0	36	56	0	113	155	108	230	#DIV/0!	Inf	-2,04	Inf	PAWR	-	-	uc001syx.3:79986386:80084024:-
chr17:55485636-55485694:mpeak_36730|chr17_55333930_55756909_MSI2_NM_+|	22,59	10,15	2,93	-3,46	5,43E-04	6,74E-02	1	0	160	0	0	0	1	5	28	17	18	41	724	#DIV/0!	Inf	-1,19	Inf	MSI2	-	-	uc010wnm.1:55334462:55754389:+;uc002iuz.1:55334103:55754389:+;uc002iva.3:55334408:55709192:+
chr17:55623717-55623771:mpeak_36732|chr17_55333930_55756909_MSI2_NM_+|	21,58	10,03	3,09	-3,25	1,16E-03	1,15E-01	0	0	149	0	0	0	1	5	28	17	18	41	1339	#DIV/0!	Inf	-1,19	Inf	MSI2	-	-	uc010wnm.1:55334462:55754389:+;uc002iuz.1:55334103:55754389:+;uc002iva.3:55334408:55709192:+
chr17:61864567-61864643:mpeak_37321|chr17_61851548_61895053_DDX42_NM_+|	145,37	10,03	2,99	-3,35	7,97E-04	9,03E-02	0	0	293	0	0	0	67	108	475	282	253	265	135	#DIV/0!	Inf	-0,30	Inf	DDX42	-	-	uc002jbu.3:61864409:61895758:+;uc002jbv.3:61864409:61895758:+
chr11:117091838-117091888:mpeak_16388|chr11_117077072_117103241_PCSK7_NM_-|	37,76	9,99	2,95	-3,38	7,21E-04	8,47E-02	0	0	205	0	0	0	41	38	11	65	45	48	681	#DIV/0!	Inf	-0,82	Inf	PCSK7	-	-	uc001pqr.3:117076712:117100560:-
chr7:133634565-133634618:mpeak_77231|chr7_132937822_133749043_EXOC4_NM_+|	86,42	9,83	3,01	-3,27	1,07E-03	1,08E-01	0	0	210	0	0	0	211	106	11	118	145	236	192	#DIV/0!	Inf	-0,60	Inf	EXOC4	-	-	uc003vrl.3:133261268:133749281:+;uc011kpp.2:133261613:133749281:+;uc011kpq.2:133622752:133749281:+;uc003vrk.3:132937857:133749281:+;uc011kpo.2:132973702:133749281:+
chr20:30339168-30339227:mpeak_51024|chr20_30326903_30388772_TPX2_NM_+|	223,21	9,82	3,17	-3,10	1,95E-03	1,56E-01	0	0	685	1	0	0	86	907	6	325	282	386	206	0	9,57	0,01	9,57	TPX2	-	-	-
chr18:72509810-72509865:mpeak_39773|chr18_72342918_72775105_ZNF407_NM_+|	20,31	9,77	3,11	-3,15	1,65E-03	1,42E-01	0	0	138	0	0	0	15	16	0	26	21	27	870	#DIV/0!	Inf	-1,22	Inf	ZNF407	-	-	uc010xfc.2:72342975:72516025:+;uc010dqu.2:72342975:72632668:+;uc002llw.2:72342975:72776424:+
chr11:118957729-118957780:mpeak_16590|chr11_118955586_118963819_HMBS_NM_+|	81,84	9,74	3,18	-3,06	2,18E-03	1,64E-01	0	0	177	0	0	0	140	159	0	147	176	183	119	#DIV/0!	Inf	-0,76	Inf	HMBS	-	-	uc001puz.1:118955743:118963993:+;uc001pva.1:118955743:118963993:+
chr3:71048835-71048951:mpeak_57481|chr3_71008542_71633140_FOXP1_NM_-|	224,36	9,68	2,92	-3,31	9,39E-04	9,83E-02	0	0	177	0	0	0	293	65	603	450	606	499	55	#DIV/0!	Inf	-0,69	Inf	FOXP1	-	-	uc003doi.3:71008397:71102906:-;uc003dok.3:71008397:71179834:-;uc003doj.3:71008397:71179834:-;uc003dol.3:71008397:71247532:-;uc003dom.3:71008397:71247532:-;uc021xan.1:71008397:71247532:-;uc003doo.3:71008397:71247532:-;uc003dop.3:71008397:71247532:-;uc021xao.1:71008397:71247532:-;uc003doq.1:71007417:71247532:-;uc003dor.1:71021686:71090681:-
chr17:6526850-6526902:mpeak_34093|chr17_6483184_6544247_KIAA0753_NM_-|	32,61	9,66	3,04	-3,18	1,46E-03	1,30E-01	0	0	238	0	0	0	17	47	6	26	43	15	1025	#DIV/0!	Inf	-0,27	Inf	KIAA0753	-	-	uc002gde.4:6483066:6538423:-
chr12:83190045-83190101:mpeak_20092|chr12_83080933_83525988_TMTC2_NM_+|	17,56	9,65	3,27	-2,95	3,16E-03	2,05E-01	0	0	188	0	0	0	8	1	0	4	6	4	4322	#DIV/0!	Inf	-0,70	Inf	TMTC2	-	-	uc001szr.1:83081365:83359568:+;uc001szs.1:83081365:83379894:+;uc001szt.3:83081365:83526168:+
chr3:71591445-71591516:mpeak_57486|chr3_71008542_71633140_FOXP1_NM_-|	222,98	9,53	2,91	-3,27	1,07E-03	1,08E-01	0	0	160	0	0	0	293	65	603	450	606	499	50	#DIV/0!	Inf	-0,69	Inf	FOXP1	-	-	-
chr11:108568003-108568155:mpeak_16161|chr11_108535751_108810972_DDX10_NM_+|	26,85	9,48	3,20	-2,96	3,06E-03	2,00E-01	0	0	221	0	0	0	10	37	0	11	30	13	945	#DIV/0!	Inf	-0,21	Inf	DDX10	-	-	uc001pkl.1:108535880:108788803:+;uc001pkm.3:108535880:108811150:+
chr10:65339585-65339639:mpeak_10303|chr10_65281122_65380572_REEP3_NM_+|	93,42	9,39	2,94	-3,19	1,40E-03	1,30E-01	1	0	298	0	0	0	291	164	6	110	137	114	97	#DIV/0!	Inf	0,35	Inf	REEP3	-	-	uc009xpl.2:65281305:65359067:+;uc001jmt.3:65281305:65380629:+
chr22:38100402-38100462:mpeak_54609|chr22_38092994_38169789_TRIOBP_NM_+|	51,39	9,33	3,11	-3,00	2,69E-03	1,82E-01	0	0	105	0	0	0	115	45	0	120	97	134	131	#DIV/0!	Inf	-1,13	Inf	TRIOBP	-	-	uc003atq.1:38097372:38122508:+;uc003atr.3:38097372:38168769:+
chr10:705751-705878:mpeak_8865|chr10_323517_735608_DIP2C_NM_-|	159,29	9,16	2,93	-3,13	1,77E-03	1,48E-01	0	0	199	0	0	0	198	88	569	245	282	331	70	#DIV/0!	Inf	0,00	Inf	DIP2C	-	-	uc001ifp.3:323264:735518:-
chr4:78694222-78694294:mpeak_62386|chr4_78641797_78740544_CNOT6L_NM_-|	206,04	9,14	3,18	-2,88	4,00E-03	2,30E-01	0	0	1697	0	0	0	15	68	575	28	40	49	774	1	11,83	2,49	9,34	CNOT6L	-	-	uc011cce.1:78663387:78740391:-;uc011ccd.2:78641584:78740391:-;uc003hks.3:78641584:78740462:-
chr17:38487772-38487833:mpeak_35717|chr17_38465422_38512260_RARA_NM_+|	55,93	9,14	2,51	-3,65	2,63E-04	3,66E-02	0	27	0	0	0	0	29	44	11	167	207	186	97	#DIV/0!	Inf	-2,74	Inf	RARA	chr17:38487832:+	chr17_40331579_+	uc002huk.2:38487470:38512478:+;uc002hul.4:38487470:38512478:+;uc010wfe.2:38487470:38512478:+;uc021txb.1:38487470:38566939:+
chr10:71138599-71138681:mpeak_10469|chr10_71029755_71160746_HK1_NM_+|	469,22	9,10	3,18	-2,86	4,20E-03	2,30E-01	0	0	83	0	0	0	823	831	0	1120	1028	1746	10	#DIV/0!	Inf	-1,24	Inf	HK1	-	-	uc001jpg.4:71060590:71160891:+;uc001jph.4:71048499:71160891:+;uc001jpi.4:71048499:71160891:+;uc001jpj.4:71048499:71160891:+;uc001jpk.4:71075710:71160891:+;uc009xqd.3:71103736:71149153:+;uc001jpl.4:71078703:71160891:+
chr5:137735632-137735706:mpeak_67498|chr5_137688284_137771308_KDM3B_NM_+|	75,33	9,05	2,91	-3,11	1,87E-03	1,54E-01	0	0	171	0	0	0	44	98	210	151	140	90	146	#DIV/0!	Inf	-0,11	Inf	KDM3B	-	-	uc003lcy.1:137688484:137771389:+;uc010jew.1:137721864:137771389:+;uc011cys.1:137733939:137771389:+
chr13:25834742-25834848:mpeak_22236|chr13_25823630_25861704_MTMR6_NM_-|	57,19	9,04	2,84	-3,18	1,47E-03	1,30E-01	0	0	111	0	0	0	121	47	44	104	141	118	156	#DIV/0!	Inf	-0,77	Inf	MTMR6	-	-	uc021rhi.1:25831873:25834819:-;uc001uqf.4:25823369:25861385:-;uc001uqe.1:25802677:25861385:-
chr6:44108762-44108813:mpeak_71031|chr6_44095375_44122428_TMEM63B_NM_+|	161,00	8,93	2,56	-3,50	4,73E-04	6,06E-02	1	2	94	1	0	0	329	68	6	556	361	514	24	0	6,76	-1,83	8,59	TMEM63B	-	-	uc003owq.1:44102321:44116745:+;uc003owr.3:44102321:44122620:+;uc003ows.3:44104098:44122620:+
chr1:32479922-32479984:mpeak_1618|chr1_32479294_32525763_KHDRBS1_NR_+mpeak_1618|chr1_32479294_32508127_KHDRBS1_NM_+||	1135,33	8,88	2,80	-3,18	1,49E-03	1,30E-01	4	0	509	0	0	0	2450	1048	6451	1086	933	1143	8	#DIV/0!	Inf	1,65	Inf	KHDRBS1	chr1:32479978:+	-	uc001bub.4:32479596:32508225:+;uc001bua.2:32479596:32508225:+
chr7:100485072-100485146:mpeak_76396|chr7_100472700_100486094_SRRT_NM_+|	114,50	8,83	3,16	-2,79	5,25E-03	2,48E-01	0	0	116	0	0	0	292	234	0	170	209	352	44	#DIV/0!	Inf	-0,47	Inf	SRRT	-	-	uc010lhl.1:100473211:100486170:+;uc003uwy.2:100473211:100486170:+;uc003uxa.2:100473211:100486170:+;uc003uwz.2:100473211:100486170:+
chr2:26024368-26024451:mpeak_44202|chr2_25967345_26101312_ASXL2_NM_-|	32,32	8,80	2,94	-2,99	2,78E-03	1,86E-01	0	1	105	0	0	0	12	100	0	48	79	43	95	#DIV/0!	Inf	-0,60	Inf	ASXL2	-	-	uc002rgs.2:25964897:26101091:-
chr13:113520499-113520562:mpeak_23723|chr13_113344642_113536129_ATP11A_NM_+|	20,16	8,76	3,05	-2,87	4,13E-03	2,30E-01	0	0	171	1	0	0	18	6	0	21	13	12	1385	6	7,57	-0,86	8,44	ATP11A	chr13:113520557:+	chr13_112866237_+	uc001vsi.4:113344730:113532608:+;uc001vsj.4:113344730:113536378:+
chr10:103553333-103553390:mpeak_11676|chr10_103546344_103578222_MGEA5_NM_-|	120,18	8,75	2,91	-3,01	2,65E-03	1,81E-01	0	0	111	0	0	0	21	372	166	245	314	214	59	#DIV/0!	Inf	-0,47	Inf	MGEA5	-	-	uc001ktv.2:103546207:103577779:-;uc010qqe.1:103546207:103577779:-;uc009xws.2:103546207:103577779:-
chr2:139318470-139318521:mpeak_47579|chr2_139259349_139326505_SPOPL_NM_+|	33,05	8,66	2,91	-2,97	2,96E-03	1,96E-01	0	0	83	0	0	0	72	35	6	57	102	42	220	#DIV/0!	Inf	-0,83	Inf	SPOPL	-	-	uc002tvh.3:139307786:139326650:+
chr5:77357677-77357730:mpeak_66022|chr5_77298879_77590579_AP3B1_NM_-|	27,64	8,64	3,11	-2,78	5,51E-03	2,50E-01	0	0	88	0	0	0	76	17	0	65	56	30	191	#DIV/0!	Inf	-0,70	Inf	AP3B1	-	-	uc031skl.1:77298725:77563400:-;uc003kfj.4:77298725:77590403:-
chr8:133851622-133851735:mpeak_81093|chr8_133787603_133858025_PHF20L1_NM_+|	28,57	8,64	3,23	-2,67	7,49E-03	2,84E-01	0	0	276	0	0	0	6	38	0	7	8	7	1263	#DIV/0!	Inf	0,95	Inf	PHF20L1	-	-	uc003ytt.3:133790074:133858168:+;uc011lja.2:133790074:133858168:+
chr2:217288354-217288418:mpeak_49412|chr2_217277136_217347460_SMARCAL1_NM_+|	15,39	8,64	3,19	-2,71	6,72E-03	2,79E-01	0	0	83	0	0	0	2	34	0	13	18	34	454	#DIV/0!	Inf	-0,84	Inf	SMARCAL1	-	-	uc002vgc.4:217279427:217347700:+;uc002vgd.4:217279427:217347700:+;uc010fvg.3:217279427:217347700:+
chr2:122260741-122260816:mpeak_47176|chr2_122098523_122407052_CLASP1_NM_-|	155,21	8,64	2,45	-3,52	4,28E-04	5,61E-02	9	1	497	0	1	0	54	211	442	199	264	184	72	0	8,93	0,13	8,80	CLASP1	-	-	uc002tnc.3:122098436:122363471:-;uc010yyz.2:122098436:122363471:-;uc010yza.2:122098436:122363471:-;uc021vnl.1:122098436:122363471:-;uc002tng.1:122159198:122363471:-
chr9:127092544-127092604:mpeak_84183|chr9_127019884_127113115_NEK6_NM_+|	130,21	8,51	2,77	-3,07	2,11E-03	1,64E-01	0	1	133	0	0	0	224	485	17	175	251	277	28	#DIV/0!	Inf	0,04	Inf	NEK6	-	-	uc004bof.3:127019975:127113226:+;uc004boh.3:127055219:127113226:+;uc004bog.3:127064243:127113226:+;uc010mwk.3:127064243:127113226:+;uc022bnf.1:127055219:127113226:+;uc004boi.3:127064243:127113226:+;uc022bng.1:127054772:127113226:+
chr10:116285410-116285469:mpeak_12081|chr10_116196132_116444414_ABLIM1_NM_-|	47,65	8,49	3,17	-2,68	7,32E-03	2,83E-01	0	0	149	0	0	0	140	89	0	48	63	84	131	#DIV/0!	Inf	0,24	Inf	ABLIM1	-	-	uc021pzd.1:116200776:116335281:-;uc021pze.1:116200776:116391676:-;uc021pyw.1:116197669:116417959:-;uc021pyx.1:116196018:116417959:-;uc021pyy.1:116196018:116444112:-;uc021pyz.1:116197669:116444094:-;uc021pza.1:116196018:116444112:-;uc021pzf.1:116200776:116444094:-
chr16:53983704-53983756:mpeak_32029|chr16_53737874_54145673_FTO_NM_+|	25,12	8,46	3,14	-2,70	7,00E-03	2,79E-01	0	0	122	0	0	0	22	66	0	23	28	40	276	#DIV/0!	Inf	-0,05	Inf	FTO	-	chr16_53949855_+	uc002ehr.3:53738096:54145827:+;uc010vha.2:53878203:54145827:+;uc010cbz.3:53922821:54145827:+
chr12:122967950-122968007:mpeak_21543|chr12_122958822_122985620_ZCCHC8_NM_-|	116,75	8,46	3,09	-2,74	6,21E-03	2,63E-01	0	0	315	0	0	0	22	75	685	108	90	106	121	#DIV/0!	Inf	1,37	Inf	ZCCHC8	-	-	uc001ucn.3:122958043:122985387:-
chr12:395227-395407:mpeak_17049|chr12_394828_498621_KDM5A_NM_-|	119,26	8,44	3,08	-2,74	6,18E-03	2,63E-01	0	1	127	0	0	0	54	611	0	226	264	149	19	#DIV/0!	Inf	0,06	Inf	KDM5A	chr12:395225:-	chr12_286060_-;chr12_286159_-	uc001qif.1:394621:498257:-
chr1:119627037-119627089:mpeak_4676|chr1_119576011_119683295_WARS2_NM_-|	33,42	8,44	3,12	-2,71	6,78E-03	2,79E-01	0	0	94	0	0	0	98	34	0	40	91	43	142	#DIV/0!	Inf	-0,41	Inf	WARS2	-	-	uc001ehm.3:119575982:119683267:-;uc001ehn.3:119575533:119683267:-;uc010oxg.2:119575533:119683267:-;uc010oxh.2:119575951:119683267:-
chr5:107585768-107585906:mpeak_66618|chr5_107197561_107717799_FBXL17_NM_-|	56,30	8,42	3,18	-2,65	8,07E-03	2,96E-01	0	0	83	0	0	0	225	14	0	112	146	95	69	#DIV/0!	Inf	-0,57	Inf	FBXL17	-	-	uc011cvc.2:107197420:107717392:-;uc003kon.4:107216563:107700618:-
chr15:72300169-72300298:mpeak_28925|chr15_72119384_72410440_MYO9A_NM_-|	19,36	8,41	2,61	-3,22	1,30E-03	1,23E-01	0	5	171	1	0	0	7	6	11	12	12	7	1103	9	7,62	-0,35	7,97	MYO9A	-	-	uc002ato.4:72252233:72338904:-;uc002atl.5:72118920:72338904:-;uc002atn.1:72185263:72338904:-;uc010biq.4:72189797:72302728:-
chr16:78871294-78871345:mpeak_33013|chr16_78133309_79245504_WWOX_NM_+|	15,76	8,30	3,27	-2,54	1,12E-02	3,55E-01	0	0	88	0	0	0	43	1	0	7	36	14	403	#DIV/0!	Inf	-0,37	Inf	WWOX	-	-	uc002ffk.3:78133675:79245693:+;uc010vnk.2:78148981:79245693:+;uc002ffl.3:78133675:79245693:+;uc010che.3:78133675:79246031:+
chr10:126332185-126332244:mpeak_12360|chr10_126312173_126432930_FAM53B_NM_-|	107,58	8,26	2,84	-2,91	3,63E-03	2,18E-01	0	2	216	0	0	0	41	39	641	161	85	107	45	#DIV/0!	Inf	1,03	Inf	FAM53B	-	-	uc001lhu.1:126307329:126395282:-;uc001lhv.1:126311810:126395282:-
chr8:133826762-133826998:mpeak_81089|chr8_133787603_133858025_PHF20L1_NM_+|	23,04	8,24	3,21	-2,56	1,03E-02	3,42E-01	0	0	210	0	0	0	6	38	0	7	8	7	960	#DIV/0!	Inf	0,95	Inf	PHF20L1	-	-	uc003ytt.3:133790074:133858168:+;uc011lja.2:133790074:133858168:+;uc031tck.1:133811067:133837365:+
chr11:14639769-14639821:mpeak_13230|chr11_14526794_14665180_PSMA1_NM_-|	252,96	8,18	2,80	-2,92	3,48E-03	2,13E-01	0	0	111	0	0	0	611	366	536	463	461	487	22	#DIV/0!	Inf	0,10	Inf	PSMA1	-	-	-
chrX:24966097-24966152:mpeak_85607|chrX_24712063_25013921_POLA1_NM_+|	21,03	8,16	2,52	-3,24	1,18E-03	1,16E-01	4	1	66	0	0	0	27	40	6	66	25	19	99	#DIV/0!	Inf	-0,61	Inf	POLA1	-	-	uc004dbl.3:24712078:25014067:+
chr6:149838512-149838595:mpeak_73078|chr6_149826840_149867238_PPIL4_NM_-|	70,46	8,15	2,92	-2,79	5,21E-03	2,48E-01	0	0	199	0	0	0	66	144	221	74	93	48	138	#DIV/0!	Inf	1,01	Inf	PPIL4	-	chr6_149517362_-;chr6_149517396_-	uc003qmo.2:149826588:149867141:-;uc003qmp.2:149838461:149867141:-
chr2:28498993-28499045:mpeak_44408|chr2_28113481_28561316_BRE_NM_+|	58,86	8,13	2,94	-2,77	5,65E-03	2,50E-01	0	0	88	0	0	0	189	94	6	112	99	118	92	#DIV/0!	Inf	-0,19	Inf	BRE	-	-	uc002rlq.3:28117423:28532991:+;uc002rlr.3:28117423:28561380:+;uc002rlt.3:28117423:28532991:+;uc002rls.3:28117423:28550300:+;uc002rlu.3:28117423:28561380:+;uc002rlp.2:28117423:28561396:+;uc002rlv.3:28248206:28561380:+
chr17:29664552-29664616:mpeak_35205|chr17_29421944_29701030_NF1_NM_+|	17,25	8,01	2,98	-2,69	7,13E-03	2,79E-01	0	0	105	0	0	0	9	7	39	18	24	5	570	#DIV/0!	Inf	0,25	Inf	NF1	-	-	uc010cso.3:29654684:29701173:+;uc002hgg.3:29422327:29701173:+;uc002hgh.3:29422327:29701173:+
chr3:142095284-142095407:mpeak_59089|chr3_142030655_142166904_XRN1_NM_-|	40,61	7,96	2,89	-2,75	5,94E-03	2,57E-01	0	0	249	0	2	0	20	58	6	54	76	23	891	3	7,17	-0,87	8,04	XRN1	-	-	uc010huu.3:142030352:142131499:-;uc003eus.3:142030352:142166786:-;uc003eut.3:142030352:142166786:-;uc003euu.3:142030352:142166786:-
chr17:35474592-35474786:mpeak_35463|chr17_35444374_35766902_ACACA_NM_-|	81,49	7,93	2,80	-2,83	4,69E-03	2,36E-01	0	0	88	0	0	0	92	217	138	186	173	83	59	#DIV/0!	Inf	0,01	Inf	ACACA	-	-	uc010wdb.2:35444250:35479593:-;uc010wdc.2:35444250:35487090:-;uc010cuy.3:35444250:35562705:-;uc002hnk.3:35444250:35641864:-;uc002hnl.3:35444250:35656257:-;uc002hnm.3:35444250:35687339:-;uc002hnn.3:35444250:35687339:-;uc002hno.3:35444250:35766389:-
chr3:142123862-142123927:mpeak_59092|chr3_142030655_142166904_XRN1_NM_-|	24,07	7,93	2,33	-3,40	6,76E-04	8,10E-02	4	4	44	0	0	0	20	58	6	54	76	23	62	#DIV/0!	Inf	-0,87	Inf	XRN1	-	-	uc003euv.1:142095316:142144369:-;uc010huu.3:142030352:142131499:-;uc003eus.3:142030352:142166786:-;uc003eut.3:142030352:142166786:-;uc003euu.3:142030352:142166786:-
chr12:54662292-54662358:mpeak_19050|chr12_54635689_54673915_CBX5_NM_-|	740,47	7,86	2,92	-2,70	7,04E-03	2,79E-01	0	0	138	0	0	0	1831	223	3438	944	1274	1038	8	#DIV/0!	Inf	0,75	Inf	CBX5	-	-	-
chr11:14642041-14642096:mpeak_13231|chr11_14526794_14665180_PSMA1_NM_-|	251,12	7,84	2,77	-2,83	4,62E-03	2,36E-01	0	0	88	0	0	0	611	366	536	463	461	487	18	#DIV/0!	Inf	0,10	Inf	PSMA1	-	-	-
chr1:150915117-150915171:mpeak_5279|chr1_150898814_150936722_SETDB1_NM_+|	67,09	7,76	2,94	-2,64	8,40E-03	3,02E-01	0	0	304	11	1	0	17	36	0	155	140	142	1150	4	4,74	-3,05	7,79	SETDB1	-	-	uc001evw.4:150900190:150917638:+;uc009wmf.2:150900190:150923564:+;uc009wmg.2:150900190:150936322:+;uc001evv.2:150900190:150936840:+;uc001evu.2:150900190:150936840:+
chr16:84096905-84096970:mpeak_33126|chr16_84088250_84150548_MBTPS1_NM_-|	189,10	7,75	2,77	-2,80	5,07E-03	2,43E-01	0	0	88	0	0	0	379	346	437	345	361	312	23	#DIV/0!	Inf	0,19	Inf	MBTPS1	chr16:84096882:-	-	uc002fhh.3:84088053:84108306:-;uc002fhi.3:84088053:84135388:-
chr8:17804672-17804759:mpeak_78286|chr8_17780365_17885145_PCM1_NM_+|	26,48	7,74	2,53	-3,06	2,18E-03	1,64E-01	9	1	105	0	0	0	7	38	77	13	45	22	93	#DIV/0!	Inf	0,61	Inf	PCM1	-	chr8_17947222_+	uc003wyg.2:17793119:17810694:+;uc003wyh.3:17793119:17813166:+;uc010lta.1:17793119:17817672:+;uc003wyi.4:17793119:17885171:+;uc011kyh.2:17793119:17885171:+;uc003wyj.4:17793119:17885171:+;uc022asj.1:17793119:17885171:+
chr7:11150406-11150457:mpeak_74201|chr7_11013498_11209042_PHF14_NR_+|	27,99	7,73	2,95	-2,62	8,80E-03	3,10E-01	0	0	243	0	2	0	1	8	28	22	16	16	1993	10	7,14	-0,57	7,71	PHF14	-	-	uc011jxj.2:11014527:11209117:+
chr5:78204685-78204743:mpeak_66054|chr5_78076485_78282357_ARSB_NM_-|	16,58	7,73	3,14	-2,46	1,38E-02	3,95E-01	0	0	88	0	0	0	50	9	0	12	18	21	300	#DIV/0!	Inf	0,20	Inf	ARSB	-	-	uc003kfq.3:78076219:78281071:-;uc003kfr.4:78111908:78281071:-
chr1:54520049-54520146:mpeak_2755|chr1_54519244_54576724_TCEANC2_NR_+mpeak_2755|chr1_54519244_54561957_TCEANC2_NM_+||	9,05	7,70	3,25	-2,37	1,77E-02	4,33E-01	0	2	83	0	0	0	0	12	0	4	7	0	346	#DIV/0!	Inf	0,04	Inf	TCEANC2	-	-	uc001cwt.1:54520095:54562146:+
chr11:95583881-95583941:mpeak_15946|chr11_95568615_95657371_MTMR2_NM_-|	24,86	7,69	3,12	-2,46	1,38E-02	3,95E-01	0	0	99	0	0	0	48	66	0	20	47	18	175	#DIV/0!	Inf	0,42	Inf	MTMR2	-	-	uc010ruj.1:95578116:95641054:-;uc001pfv.3:95568453:95598810:-;uc001pfs.3:95568453:95598810:-;uc001pft.3:95568453:95598810:-;uc001pfu.3:95568453:95657118:-
chr6:83834502-83834554:mpeak_71669|chr6_83777384_83877580_DOPEY1_NM_+|	29,29	7,51	3,34	-2,25	2,47E-02	5,01E-01	0	0	193	0	0	0	0	9	111	13	14	11	324	#DIV/0!	Inf	1,64	Inf	DOPEY1	-	-	uc011dyy.2:83806696:83877886:+;uc003pjs.1:83806696:83877886:+;uc010kbl.1:83806696:83877886:+
chr8:17868114-17868174:mpeak_78300|chr8_17780365_17885145_PCM1_NM_+|	24,92	7,48	2,74	-2,73	6,41E-03	2,69E-01	2	0	94	0	0	0	7	38	77	13	45	22	117	#DIV/0!	Inf	0,61	Inf	PCM1	-	chr8_18010665_+	uc011kyi.2:17827087:17885171:+;uc011kyj.2:17830042:17885171:+;uc003wyk.4:17830042:17885171:+;uc011kyk.2:17842975:17885171:+;uc003wyi.4:17793119:17885171:+;uc011kyh.2:17793119:17885171:+;uc003wyj.4:17793119:17885171:+;uc022asj.1:17793119:17885171:+
chr3:127524025-127524078:mpeak_58551|chr3_127411166_127542093_MGLL_NM_-|	92,51	7,48	3,13	-2,39	1,68E-02	4,27E-01	0	0	83	0	0	0	242	338	0	129	132	187	29	#DIV/0!	Inf	0,37	Inf	MGLL	-	-	uc003ejw.4:127411040:127541161:-;uc011bko.3:127411040:127541161:-;uc003ejx.4:127411040:127540661:-;uc010hsp.2:127434464:127540661:-
chrX:53590558-53590614:mpeak_86118|chrX_53560372_53713674_HUWE1_NM_-|	647,60	7,47	2,94	-2,54	1,10E-02	3,52E-01	0	0	160	0	0	0	218	2592	2670	774	938	418	9	#DIV/0!	Inf	1,36	Inf	HUWE1	-	-	uc004dsn.4:53560269:53620539:-;uc004dsp.4:53560269:53681051:-
chr13:94826500-94826714:mpeak_23376|chr13_93879077_95055268_GPC6_NM_+|	37,20	7,46	2,97	-2,51	1,20E-02	3,65E-01	0	0	133	0	0	0	135	7	72	39	22	39	186	#DIV/0!	Inf	1,09	Inf	GPC6	-	-	uc010tig.1:93879709:94958512:+;uc001vlt.3:93879709:95055471:+
chr10:13371695-13371744:mpeak_9237|chr10_13361356_13390298_SEPHS1_NM_-|	112,16	7,44	2,77	-2,69	7,20E-03	2,80E-01	0	0	88	0	1	0	380	103	44	209	268	254	50	0	7,27	-0,47	7,74	SEPHS1	-	-	uc009xje.3:13371676:13386950:-;uc001imh.3:13361141:13378419:-;uc010qbs.2:13361141:13380857:-;uc001imk.3:13361141:13386950:-;uc010qbt.2:13361141:13380800:-;uc021pnc.1:13361141:13386950:-;uc021pnd.1:13364054:13386950:-
chr14:50255935-50256070:mpeak_24731|chr14_50251431_50319791_NEMF_NM_-|	12,37	7,44	2,53	-2,94	3,26E-03	2,07E-01	2	8	50	0	1	0	2	25	0	23	32	5	149	3	6,71	-1,17	7,88	NEMF	-	-	uc001wwz.3:50251353:50263015:-;uc001wxa.3:50251353:50267349:-;uc001wxc.3:50251353:50319471:-;uc010tqi.2:50251353:50319471:-;uc001wxe.2:50251642:50319471:-;uc010anj.1:50033027:50319471:-
chr14:23990300-23990350:mpeak_24124|chr14_23980968_24027903_THTPA_NR_+|	18,51	7,40	2,99	-2,47	1,33E-02	3,88E-01	0	0	94	1	0	0	27	29	0	22	20	30	337	4	6,71	-0,36	7,07	THTPA	-	-	uc001wkb.5:23983501:24028049:+
chr22:28640707-28640905:mpeak_54211|chr22_28379839_29075853_TTC28_NM_-|	19,57	7,39	2,94	-2,52	1,19E-02	3,65E-01	0	1	144	0	0	0	3	55	6	13	9	4	339	#DIV/0!	Inf	1,25	Inf	TTC28	-	-	uc003adp.4:28378208:29075711:-
chr15:64496627-64496680:mpeak_28595|chr15_64464184_64648442_CSNK1G1_NM_-|	108,88	7,26	3,08	-2,35	1,85E-02	4,43E-01	0	0	155	0	0	0	12	47	796	81	110	106	54	#DIV/0!	Inf	1,53	Inf	CSNK1G1	-	-	uc002anf.3:64464129:64592698:-;uc002ang.1:64458176:64592698:-;uc002anh.1:64458176:64592698:-;uc002anj.3:64473467:64558064:-
chr6:43483620-43483757:mpeak_70973|chr6_43480053_43484728_YIPF3_NM_-|	91,12	7,21	2,59	-2,78	5,38E-03	2,50E-01	5	0	83	1	0	0	256	191	11	143	178	226	29	0	6,61	-0,25	6,87	YIPF3	chr6:43483756:-	-	uc003ovl.2:43479904:43484545:-;uc011dvk.2:43479904:43483809:-
chr11:70050045-70050097:mpeak_15164|chr11_70049268_70052238_FADD_NM_+|	87,42	7,16	2,31	-3,10	1,95E-03	1,56E-01	3	7	6	0	1	0	19	121	0	272	285	336	7	0	4,75	-2,67	7,42	FADD	-	chr11_70203991_+	uc001opm.2:70049565:70052579:+
chr13:37621671-37621742:mpeak_22541|chr13_37583946_37633850_SUPT20H_NM_-|	17,31	7,14	2,58	-2,77	5,61E-03	2,50E-01	4	0	99	3	2	0	1	12	0	26	27	34	816	8	4,55	-2,78	7,33	SUPT20H	-	chr13_37047602_-	uc010abt.3:37583845:37625627:-;uc001uwg.3:37583808:37625627:-;uc001uwh.3:37583845:37625627:-;uc001uwi.3:37583845:37625627:-;uc001uwj.3:37583845:37625627:-;uc001uwk.3:37583845:37625627:-;uc010tes.1:37597167:37625627:-;uc001uwl.1:37598160:37625627:-
chr11:82985676-82985738:mpeak_15681|chr11_82973008_82997450_CCDC90B_NM_-|	28,85	7,11	2,74	-2,59	9,48E-03	3,26E-01	16	0	61	0	0	0	52	111	0	40	41	25	47	#DIV/0!	Inf	0,63	Inf	CCDC90B	chr11:82985682:-	-	uc001pac.3:82972952:82989789:-;uc001pad.3:82972952:82989789:-;uc001pae.3:82972952:82997015:-;uc001paf.3:82972952:82997215:-
chr16:58200482-58200537:mpeak_32173|chr16_58192257_58231782_CSNK2A2_NM_-|	92,88	7,06	3,06	-2,31	2,11E-02	4,68E-01	0	0	304	0	0	0	22	139	542	24	36	47	130	#DIV/0!	Inf	2,72	Inf	CSNK2A2	-	-	uc002enc.3:58197974:58231640:-
chr15:63353944-63354000:mpeak_28497|chr15_63334837_63363288_TPM1_NM_+|	190,87	7,03	2,61	-2,69	7,08E-03	2,79E-01	0	1	99	0	0	0	410	254	829	219	276	201	10	#DIV/0!	Inf	1,10	Inf	TPM1	-	chr15_63061755_+	uc010uif.2:63340774:63355008:+;uc002alg.3:63335028:63358098:+;uc002alh.3:63335028:63356345:+;uc002alm.3:63335028:63363371:+;uc002ali.3:63335028:63363371:+;uc002alj.3:63335028:63363371:+;uc002alk.3:63335028:63363371:+;uc002all.3:63335028:63363371:+;uc010uie.2:63335028:63356345:+;uc002alp.3:63335028:63356345:+;uc002alr.3:63340774:63362142:+;uc002als.3:63340774:63362142:+;uc010uig.2:63340774:6336337…
chr1:164669038-164669274:mpeak_6160|chr1_164528596_164815820_PBX1_NM_+|	725,74	7,01	3,20	-2,19	2,85E-02	5,42E-01	0	0	193	0	0	0	810	6	6091	524	504	580	8	#DIV/0!	Inf	2,10	Inf	PBX1	-	-	uc010pku.2:164529059:164818639:+;uc001gct.3:164529059:164815913:+;uc001gcs.3:164529059:164790820:+;uc010pkv.2:164529234:164815913:+
chr14:38063600-38063712:mpeak_24562|chr14_38061916_38064325_FOXA1_NM_-|	98,64	6,95	2,27	-3,06	2,25E-03	1,64E-01	18	1	0	0	5	0	26	7	6	403	388	331	74	1	2,04	-4,87	6,91	FOXA1	chr14:38063600:-;chr14:38063660:-	chr14_37594416_-;chr14_37594457_-	uc001wuf.4:38060569:38064177:-
chr1:36759615-36759849:mpeak_1928|chr1_36690016_36769396_THRAP3_NM_+|	267,54	6,95	2,64	-2,63	8,51E-03	3,04E-01	0	0	238	1	1	0	426	291	735	490	434	595	49	0	6,86	-0,07	6,92	THRAP3	-	-	uc001cae.4:36748164:36769618:+;uc001caf.4:36748164:36769618:+
chr2:32312553-32312614:mpeak_44514|chr2_32288679_32379442_SPAST_NM_+|	30,79	6,91	2,82	-2,45	1,43E-02	3,99E-01	0	0	138	1	0	0	27	78	39	20	33	34	288	3	7,26	0,73	6,53	SPAST	-	-	uc002roc.3:32288900:32379565:+;uc002rod.3:32288900:32379565:+
chr6:157372208-157372437:mpeak_73353|chr6_157099063_157527300_ARID1B_NM_+|	212,34	6,90	3,14	-2,20	2,78E-02	5,31E-01	0	0	304	0	0	0	29	134	1813	83	93	94	46	#DIV/0!	Inf	2,88	Inf	ARID1B	-	chr6_157051320_+	uc003qqo.3:157099063:157529025:+;uc003qqp.3:157099063:157529025:+;uc003qqn.3:157099063:157529025:+;uc003qqq.1:157256602:157470146:+
chr19:39332217-39332307:mpeak_42082|chr19_39327420_39342979_HNRNPL_NM_-mpeak_42082|chr19_39327420_39342979_HNRNPL_NM_-||	195,76	6,88	2,73	-2,53	1,15E-02	3,59E-01	0	0	105	0	1	0	567	282	409	358	199	430	25	0	7,51	0,35	7,16	HNRNPL	chr19:39332218:-	-	uc021uui.1:39327361:39336717:-;uc010xun.2:39330785:39332255:-;uc021uuh.1:39327361:39340606:-
chr17:33925230-33925331:mpeak_35370|chr17_33914281_34050643_AP2B1_NM_+|	182,64	6,86	2,82	-2,44	1,48E-02	4,04E-01	0	2	72	0	0	0	373	626	0	328	442	349	7	0	7,30	-0,16	7,47	AP2B1	-	chr17_35598232_+;chr17_35598285_+	uc002hjq.3:33921049:34050718:+;uc002hjr.3:33921049:34050718:+;uc010wci.2:33921049:34050718:+;uc002hjt.3:33921049:34050718:+;uc010ctv.3:33921049:34050718:+
chr14:21859614-21859667:mpeak_23976|chr14_21854335_21905457_CHD8_NM_-|	237,88	6,86	3,04	-2,25	2,41E-02	5,00E-01	0	0	105	0	0	0	7	485	1481	263	329	184	16	#DIV/0!	Inf	1,35	Inf	CHD8	-	-	uc001war.2:21853771:21899802:-;uc001was.2:21853771:21899975:-
chr7:138921772-138921854:mpeak_77401|chr7_138916230_138982532_UBN2_NM_+|	53,92	6,85	2,91	-2,36	1,84E-02	4,43E-01	0	0	149	1	0	0	12	54	260	58	50	63	138	2	7,38	0,93	6,45	UBN2	-	-	uc011kqr.2:138916230:138982582:+
chr7:23561671-23562067:mpeak_74440|chr7_23545188_23571660_TRA2A_NM_-|	596,04	6,85	2,19	-3,13	1,77E-03	1,48E-01	7	57	4024	12	29	14	463	693	28	543	641	641	345	3	6,23	-0,62	6,86	TRA2A	-	chr7_23522106_-	uc003swi.3:23545177:23571443:-
chr4:151453287-151453385:mpeak_63751|chr4_151186964_151936649_LRBA_NM_-|	221,95	6,85	3,10	-2,21	2,71E-02	5,24E-01	0	0	304	0	0	0	87	124	1874	92	134	48	44	#DIV/0!	Inf	2,92	Inf	LRBA	-	-	uc003ils.4:151186873:151502502:-;uc003ilt.4:151186873:151770708:-;uc003ilu.4:151186873:151935794:-;uc010ipj.3:151186873:151935794:-
chr2:17876471-17876568:mpeak_43998|chr2_17846880_17935096_SMC6_NM_-|	33,20	6,84	3,33	-2,05	4,00E-02	6,18E-01	0	0	221	0	0	0	0	34	116	4	11	11	294	#DIV/0!	Inf	2,50	Inf	SMC6	-	-	uc002rco.3:17846765:17927213:-;uc002rcn.3:17846765:17927213:-;uc010exo.3:17846765:17927213:-
chr2:153519622-153519708:mpeak_47838|chr2_153512912_153573975_PRPF40A_NM_-|	86,26	6,83	2,24	-3,04	2,33E-03	1,67E-01	12	2	77	0	0	0	141	111	398	85	121	88	14	#DIV/0!	Inf	1,15	Inf	PRPF40A	-	chr2_152663144_-	uc002tyg.4:153512819:153525782:-;uc002tyh.4:153512819:153573953:-;uc010zcd.1:153514402:153573953:-
chr4:69188374-69188591:mpeak_62128|chr4_69180041_69215824_YTHDC1_NM_-|	230,14	6,80	2,99	-2,27	2,30E-02	4,88E-01	0	1	326	0	0	0	23	103	2051	95	101	61	23	#DIV/0!	Inf	3,08	Inf	YTHDC1	-	-	uc003hdx.3:69179816:69215471:-;uc003hdy.3:69179816:69215471:-
chr12:49721820-49721870:mpeak_18586|chr12_49716970_49725355_TROAP_NM_+|	24,73	6,79	2,55	-2,66	7,75E-03	2,88E-01	13	1	0	0	0	0	19	62	0	48	50	104	18	#DIV/0!	Inf	-1,32	Inf	TROAP	-	-	uc031qhd.1:49721098:49723309:+;uc031qhe.1:49721098:49723309:+;uc001rtx.4:49717391:49725400:+;uc009zlh.3:49717391:49725400:+
chr3:124814100-124814270:mpeak_58457|chr3_124802896_124931609_SLC12A8_NM_-|	11,12	6,79	2,76	-2,45	1,41E-02	3,95E-01	0	16	0	0	0	0	11	25	0	21	18	43	88	#DIV/0!	Inf	-1,17	Inf	SLC12A8	chr3:124814214:-	chr3_125095327_-	uc003eht.4:124802733:124839669:-;uc010hry.3:124802828:124839525:-;uc003ehv.4:124802733:124930193:-;uc003ehw.4:124802733:124998021:-
chr17:38563078-38563128:mpeak_35733|chr17_38545899_38574202_TOP2A_NM_-|	121,64	6,74	2,57	-2,62	8,82E-03	3,10E-01	8	1	39	0	1	0	96	438	0	275	405	197	6	0	6,37	-0,72	7,08	TOP2A	-	chr17_40406870_-	uc002huq.3:38545770:38574043:-
chr4:87895123-87895182:mpeak_62603|chr4_87856153_88056731_AFF1_NM_+|	6,71	6,73	2,91	-2,31	2,09E-02	4,66E-01	0	12	0	0	0	0	1	16	0	18	18	14	140	#DIV/0!	Inf	-1,54	Inf	AFF1	chr4:87895183:+	chr4_86974030_+	uc003hqh.2:87869685:88012980:+;uc011ccy.2:87869685:88026834:+;uc011ccz.2:87869685:88056853:+
chr17:55674243-55674317:mpeak_36736|chr17_55333930_55756909_MSI2_NM_+|	40,05	6,71	2,31	-2,91	3,67E-03	2,18E-01	13	1	348	4	1	4	1	5	28	17	18	41	1083	12	5,36	-1,19	6,55	MSI2	-	-	uc010wnm.1:55334462:55754389:+;uc002iuz.1:55334103:55754389:+;uc002iva.3:55334408:55709192:+
chr10:112343858-112344146:mpeak_11955|chr10_112327448_112363988_SMC3_NM_+|	256,44	6,70	2,34	-2,86	4,24E-03	2,30E-01	6	86	2769	11	25	8	2	63	0	32	56	19	2928	40	6,04	-0,72	6,76	SMC3	chr10:112343915:+	chr10_110584156_+;chr10_110584202_+;chr10_110584360_+;chr10_110584375_+	uc001kze.3:112327574:112364060:+
chr15:67920272-67920332:mpeak_28801|chr15_67835020_68098983_MAP2K5_NM_+|	81,10	6,68	3,14	-2,13	3,35E-02	5,64E-01	0	0	216	0	0	0	9	44	597	12	46	50	99	#DIV/0!	Inf	2,60	Inf	MAP2K5	-	-	uc002aqu.3:67835673:68099088:+;uc002aqv.3:67835673:68099088:+;uc010ujw.2:67841518:68099088:+
chr1:155804061-155804172:mpeak_5745|chr1_155720524_155829191_GON4L_NM_-|	6,36	6,68	2,40	-2,78	5,45E-03	2,50E-01	6	5	6	0	0	0	3	14	0	17	16	9	63	#DIV/0!	Inf	-1,29	Inf	GON4L	-	-	uc001fly.1:155720374:155823571:-;uc001fmc.3:155734673:155823571:-;uc001flz.2:155720374:155823571:-;uc009wrh.1:155720374:155823571:-;uc001fmd.4:155734673:155823571:-;uc001fma.1:155720374:155823571:-
chr7:36450120-36450248:mpeak_74787|chr7_36429411_36492085_ANLN_NM_+|	45,31	6,67	2,21	-3,02	2,57E-03	1,78E-01	7	9	50	1	0	0	123	97	6	101	100	52	29	1	6,20	-0,17	6,36	ANLN	-	-	uc003tff.3:36429635:36492209:+;uc011kaz.2:36429635:36492209:+;uc003tfg.3:36429635:36492209:+;uc010kxe.3:36429635:36492209:+
chr8:89242349-89242402:mpeak_79850|chr8_89054023_89339717_MMP16_NM_-|	28,89	6,66	2,50	-2,66	7,71E-03	2,88E-01	0	8	0	0	0	0	54	8	11	57	120	89	33	#DIV/0!	Inf	-1,86	Inf	MMP16	-	-	uc003yeb.4:89053688:89339435:-
chr8:107284951-107285008:mpeak_80486|chr8_107282405_107763033_OXR1_NM_+|	12,50	6,60	2,77	-2,39	1,71E-02	4,27E-01	0	19	0	0	0	0	23	26	0	33	33	15	77	#DIV/0!	Inf	-0,72	Inf	OXR1	chr8:107285002:+	chr8_106272727_+;chr8_106272773_+	-
chr9:95780416-95780502:mpeak_83132|chr9_95709600_95797619_FGD3_NM_+|	8,15	6,57	2,82	-2,33	2,00E-02	4,58E-01	0	1	72	2	0	2	0	2	0	7	2	10	1719	33	4,14	-3,14	7,28	FGD3	-	-	uc004asw.2:95738538:95797871:+;uc004asx.2:95738538:95797871:+;uc004asz.2:95738538:95797871:+;uc004ata.3:95766330:95782862:+;uc011luc.1:95778027:95797871:+
chr10:104378348-104378431:mpeak_11748|chr10_104263718_104389822_SUFU_NM_+|	143,46	6,57	2,76	-2,38	1,73E-02	4,30E-01	0	6	221	0	1	0	15	76	1072	104	100	126	29	1	8,63	1,82	6,81	SUFU	-	chr10_102618674_+	uc001kvx.3:104263909:104378828:+;uc001kvy.2:104263909:104389912:+
chr9:139416738-139416814:mpeak_85006|chr9_139392010_139440238_NOTCH1_NM_-|	50,21	6,56	2,29	-2,86	4,18E-03	2,30E-01	2	29	0	1	0	0	30	135	33	158	128	87	23	1	5,09	-0,92	6,01	NOTCH1	chr9:139416759:-	chr9_136522287_-	uc004chz.3:139390522:139440238:-
chr1:16474298-16474436:mpeak_738|chr1_16451815_16482582_EPHA2_NM_-|	71,68	6,51	2,66	-2,44	1,45E-02	3,99E-01	0	31	0	0	0	0	105	312	11	163	79	159	22	#DIV/0!	Inf	0,10	Inf	EPHA2	chr1:16474347:-	chr1_16147853_-	uc001aya.2:16451709:16482427:-;uc010oca.2:16462083:16482427:-
chr4:56345790-56345872:mpeak_61995|chr4_56301761_56413076_CLOCK_NM_-|	29,72	6,50	2,68	-2,43	1,52E-02	4,07E-01	1	0	199	0	2	1	39	28	0	34	41	12	299	5	6,24	-0,38	6,62	CLOCK	-	-	uc003haz.2:56301581:56348952:-;uc003hba.2:56301581:56348952:-
chr3:160129733-160129884:mpeak_59568|chr3_160117091_160151444_SMC4_NM_+|	160,84	6,46	2,20	-2,94	3,33E-03	2,07E-01	1	41	1266	12	15	12	13	137	11	136	179	108	811	9	5,09	-1,39	6,49	SMC4	-	-	uc003fdg.1:160118614:160132305:+;uc010hwc.1:160129728:160142807:+;uc003fdh.3:160118614:160151597:+;uc003fdi.3:160118614:160151597:+;uc003fdj.3:160118614:160151597:+;uc010hwd.3:160118614:160151597:+
chr17:64560081-64560131:mpeak_37466|chr17_64298925_64799990_PRKCA_NM_+|	29,79	6,45	2,90	-2,22	2,64E-02	5,19E-01	0	0	127	0	0	0	28	97	61	9	20	16	206	#DIV/0!	Inf	2,05	Inf	PRKCA	-	-	uc002jfp.1:64298969:64800155:+
chr11:64003741-64003803:mpeak_14566|chr11_64002055_64005827_VEGFB_NM_+|	19,40	6,44	2,73	-2,35	1,85E-02	4,43E-01	0	4	99	0	0	0	26	55	0	9	21	18	128	3	7,79	0,74	7,06	VEGFB	-	chr11_64236302_+;chr11_64236320_+	uc001nyx.3:64002305:64005849:+;uc001nyw.3:64002305:64005105:+
chr14:96689756-96689827:mpeak_26553|chr14_96671134_96706739_BDKRB2_NM_+|	7,09	6,40	2,24	-2,85	4,33E-03	2,33E-01	11	3	0	3	2	4	0	1	0	13	18	31	1309	13	0,77	-6,88	7,65	BDKRB2	-	-	uc010avl.2:96671156:96704153:+
chr11:57068032-57068089:mpeak_14050|chr11_57067555_57092413_TNKS1BP1_NM_-|	94,81	6,36	2,45	-2,59	9,51E-03	3,26E-01	0	1	205	4	0	4	41	113	50	271	260	189	151	2	4,56	-1,82	6,38	TNKS1BP1	-	-	uc001njq.3:57068013:57070331:-;uc001njr.3:57068013:57089359:-;uc001njs.3:57068013:57089359:-
chr1:85131801-85131874:mpeak_3319|chr1_85113290_85156240_SSX2IP_NM_-|	16,56	6,35	2,58	-2,46	1,40E-02	3,95E-01	0	3	111	1	1	0	10	22	0	9	32	10	348	6	5,79	-0,65	6,44	SSX2IP	-	chr1_84666119_-	uc001dkf.3:85113115:85136460:-;uc001dkh.3:85113115:85136902:-;uc010orz.2:85113115:85136460:-;uc001dki.3:85113115:85136902:-;uc010osa.2:85113115:85136460:-;uc001dkj.3:85113115:85136902:-;uc001dkk.1:85121148:85136902:-
chr4:156715005-156715069:mpeak_63872|chr4_156680124_156727537_GUCY1B3_NM_+|	15,88	6,31	3,00	-2,10	3,53E-02	5,79E-01	0	0	166	2	1	0	9	1	0	1	7	4	3236	29	6,13	-0,24	6,37	GUCY1B3	-	-	uc003ipc.3:156680292:156727561:+;uc011cio.2:156680292:156727561:+;uc011cip.2:156693888:156727561:+;uc003ipd.3:156698713:156727561:+;uc010iqf.3:156680292:156727561:+;uc010iqg.3:156698713:156727561:+;uc011ciq.2:156698713:156727561:+
chr2:47389418-47389548:mpeak_44979|chr2_47387943_47404075_CALM2_NM_-|	2119,10	6,31	2,34	-2,70	7,03E-03	2,79E-01	27	9	9325	5	12	10	1451	481	11050	1196	874	990	72	1	8,40	2,08	6,32	CALM2	chr2:47389445:-	chr2_47162305_-	uc002rvt.2:47387914:47403582:-
chr12:50839619-50839671:mpeak_18681|chr12_50794591_50854917_LARP4_NR_+mpeak_18681|chr12_50794591_50869308_LARP4_NM_+||	108,91	6,31	2,46	-2,57	1,02E-02	3,41E-01	18	0	0	0	0	0	137	275	133	222	259	263	10	#DIV/0!	Inf	-0,45	Inf	LARP4	chr12:50839672:+	chr12_50445888_+	uc001rwm.3:50794793:50855134:+;uc001rwn.3:50822761:50855134:+;uc001rwp.2:50794793:50869647:+;uc001rwr.2:50794793:50869647:+;uc001rwq.2:50794793:50869647:+;uc001rwt.2:50794793:50869647:+;uc001rws.2:50794793:50869647:+;uc021qxv.1:50822761:50869647:+;uc009zlr.1:50831525:50869647:+
chr3:15751195-15751247:mpeak_55837|chr3_15712063_15901053_ANKRD28_NM_-|	67,10	6,30	2,38	-2,65	8,16E-03	2,98E-01	6	1	88	1	0	0	42	64	343	86	103	71	21	1	6,73	0,79	5,95	ANKRD28	-	-	uc003cai.1:15711776:15777004:-;uc011avz.1:15711776:15777004:-;uc003caj.1:15711776:15900910:-;uc003cal.1:15726733:15838028:-;uc003cam.2:15726733:15838028:-
chr1:25889732-25889804:mpeak_1251|chr1_25870075_25893338_LDLRAP1_NM_+|	39,54	6,27	2,67	-2,35	1,88E-02	4,44E-01	0	9	0	0	0	0	57	75	0	83	114	136	14	#DIV/0!	Inf	-1,34	Inf	LDLRAP1	chr1:25889787:+	chr1_25563313_+;chr1_25563330_+	uc009vrx.3:25889538:25893483:+;uc001bkl.4:25870189:25893483:+
chr1:164606293-164606349:mpeak_6155|chr1_164528596_164815820_PBX1_NM_+|	719,29	6,26	3,15	-1,98	4,71E-02	6,61E-01	0	0	116	0	0	0	810	6	6091	524	504	580	5,04	#DIV/0!	Inf	2,10	Inf	PBX1	-	-	uc010pku.2:164529059:164818639:+;uc001gct.3:164529059:164815913:+;uc001gcs.3:164529059:164790820:+;uc010pkv.2:164529234:164815913:+
chr3:107798559-107798751:mpeak_57957|chr3_107766139_107809935_CD47_NM_-|	289,58	6,26	2,28	-2,75	5,98E-03	2,57E-01	2	25	0	0	0	0	1008	652	177	501	579	532	2	#DIV/0!	Inf	0,19	Inf	CD47	chr3:107798700:-	chr3_108079854_-	uc003dwt.1:107766134:107809755:-;uc003dwv.1:107766130:107809755:-
chr3:57678262-57678313:mpeak_57178|chr3_57614072_57678816_DENND6A_NM_-|	19,83	6,26	3,11	-2,01	4,45E-02	6,41E-01	0	0	83	0	0	0	1	11	105	21	12	5	212	#DIV/0!	Inf	1,63	Inf	DENND6A	-	-	uc003dja.3:57613940:57678745:-
chr7:76242176-76242302:mpeak_75677|chr7_76239532_76256620_POMZP3_NM_-|	22,13	6,24	2,67	-2,33	1,96E-02	4,54E-01	0	25	0	0	1	0	39	45	0	37	52	67	61	1	5,47	-0,91	6,38	POMZP3	-	-	uc003uft.3:76240781:76255381:-;uc003ufu.3:76239529:76255381:-
chr21:36240013-36240073:mpeak_53071|chr21_36164907_36421595_RUNX1_NM_-|	19,36	6,24	2,77	-2,25	2,44E-02	5,01E-01	0	18	0	0	0	0	21	69	0	56	28	40	39	#DIV/0!	Inf	-0,46	Inf	RUNX1	-	-	uc002yuo.1:36193964:36259409:-;uc002yur.1:36231630:36252965:-;uc002yuh.3:36164431:36259409:-;uc010gmu.3:36164431:36421196:-;uc010gmv.3:36164431:36421196:-;uc002yuj.4:36164431:36252965:-;uc002yuk.4:36164431:36421196:-;uc002yum.1:36170351:36252965:-;uc010gmw.1:36206416:36421196:-
chr9:86590275-86590392:mpeak_82908|chr9_86584355_86595569_HNRNPK_NM_-mpeak_82908|chr9_86584355_86595569_HNRNPK_NM_-||	1716,95	6,23	2,31	-2,70	6,94E-03	2,79E-01	3	2	50	0	0	0	2954	1452	9021	2216	2080	2826	0	#DIV/0!	Inf	0,91	Inf	HNRNPK	chr9:86590282:-	chr9_83975368_-	uc004anf.4:86584321:86593167:-;uc004ang.4:86584264:86593167:-;uc004anh.4:86584321:86593167:-;uc011lsx.2:86584264:86593167:-;uc004anl.4:86584321:86593167:-;uc004anm.4:86584264:86593167:-
chr8:96062010-96062062:mpeak_80056|chr8_96037213_96070036_NDUFAF6_NM_+|	24,63	6,21	2,57	-2,42	1,56E-02	4,11E-01	15	0	0	0	0	0	78	16	17	50	57	62	42	#DIV/0!	Inf	-0,62	Inf	NDUFAF6	-	-	uc003yhi.3:95993160:96070165:+;uc003yhj.3:96037236:96070165:+
chr3:158178715-158178781:mpeak_59513|chr3_157827840_158261971_RSRC1_NM_+|	31,21	6,20	2,43	-2,56	1,06E-02	3,48E-01	9	1	310	0	2	3	15	6	0	9	17	2	984	27	6,00	-0,37	6,38	RSRC1	-	-	uc011bou.2:157839893:158187158:+;uc003fbt.4:157839893:158262064:+;uc003fbu.2:157839893:158262064:+;uc003fbv.4:157839893:158262064:+
chr6:24709000-24709057:mpeak_69708|chr6_24706490_24719403_C6orf62_NM_-|	187,14	6,20	2,59	-2,40	1,66E-02	4,22E-01	2	0	122	1	0	0	279	276	945	215	217	190	12	0	7,10	1,27	5,83	C6orf62	-	-	uc003nel.3:24706364:24718896:-
chr18:12479541-12479621:mpeak_38716|chr18_12449895_12657912_SPIRE1_NM_-|	48,05	6,19	2,40	-2,58	9,85E-03	3,36E-01	0	11	0	0	0	0	76	91	28	106	165	100	17	#DIV/0!	Inf	-0,93	Inf	SPIRE1	-	-	uc010wzw.2:12449636:12635072:-;uc010wzx.2:12449636:12635072:-;uc002kre.3:12449636:12657865:-;uc010wzy.2:12449636:12657865:-
chr8:143812757-143812810:mpeak_81275|chr8_143808620_143816743_THEM6_NM_+|	107,03	6,19	2,48	-2,50	1,24E-02	3,67E-01	14	2	0	1	0	0	119	220	0	252	291	385	4,83	0	4,19	-1,45	5,64	THEM6	chr8:143812809:+;chr8:143812844:+	chr8_142731390_+	uc003yww.1:143808764:143816857:+;uc011ljy.1:143808764:143816857:+
chr6:57400394-57400453:mpeak_71312|chr6_57179602_57512796_PRIM2_NM_+|	10,12	6,17	2,74	-2,25	2,46E-02	5,01E-01	0	13	0	0	0	0	13	27	0	17	28	24	67	#DIV/0!	Inf	-0,78	Inf	PRIM2	-	-	uc003pdx.3:57183243:57512702:+
chr3:15357655-15357800:mpeak_55804|chr3_15297810_15382901_SH3BP5_NM_-|	134,79	6,16	2,56	-2,40	1,63E-02	4,20E-01	0	8	0	0	0	0	372	69	11	388	321	448	5,28	#DIV/0!	Inf	-1,36	Inf	SH3BP5	-	-	uc003bzp.2:15297592:15373915:-
chr17:15884239-15884300:mpeak_34490|chr17_15881477_15903006_ZSWIM7_NM_-|	62,40	6,12	2,80	-2,19	2,87E-02	5,42E-01	0	16	0	0	0	0	235	81	0	103	129	184	10	#DIV/0!	Inf	-0,40	Inf	ZSWIM7	chr17:15884243:-	chr17_15980915_-	uc002gpe.3:15881360:15902908:-;uc002gpf.3:15881360:15902908:-
chr15:38762421-38762471:mpeak_27430|chr15_38746327_38776455_FAM98B_NM_+|	31,94	6,11	2,42	-2,52	1,17E-02	3,62E-01	9	2	22	0	0	0	66	128	0	51	55	50	11	#DIV/0!	Inf	0,32	Inf	FAM98B	-	chr15_38470289_+	uc001zkb.1:38746362:38773756:+;uc001zkc.3:38746362:38776860:+
chr2:74061125-74061187:mpeak_45780|chr2_74056042_74089329_STAMBP_NM_+|	57,20	6,10	2,66	-2,30	2,16E-02	4,71E-01	1	14	0	0	0	0	246	37	0	134	102	152	5,43	#DIV/0!	Inf	-0,46	Inf	STAMBP	-	-	uc002sjs.3:74057983:74089386:+;uc002sju.3:74057983:74089386:+;uc002sjv.3:74057983:74089386:+
chr21:37728913-37728975:mpeak_53108|chr21_37692486_37747440_MORC3_NM_+|	14,11	6,08	2,81	-2,16	3,09E-02	5,58E-01	0	0	116	2	2	0	3	12	0	9	14	12	1521	15	5,04	-1,17	6,22	MORC3	-	chr21_36356633_+	uc002yvi.3:37692562:37747594:+
chr3:128890463-128890516:mpeak_58638|chr3_128889413_128902810_CNBP_NM_-|	615,08	6,07	2,91	-2,08	3,74E-02	6,00E-01	0	0	122	0	0	0	801	398	4875	409	320	456	6	#DIV/0!	Inf	2,36	Inf	CNBP	-	-	uc021xdt.1:128889295:128890600:-;uc021xdu.1:128889295:128890600:-;uc003elr.4:128889295:128890600:-;uc003elq.4:128889295:128890600:-;uc021xdv.1:128889295:128890600:-;uc021xdw.1:128889295:128890600:-;uc011bku.2:128889295:128890600:-
chr17:60631005-60631112:mpeak_37224|chr17_60556385_60689752_TLK2_NM_+|	93,80	6,06	2,82	-2,15	3,18E-02	5,60E-01	1	0	116	1	0	0	9	68	647	84	128	73	24	1	7,03	1,35	5,67	TLK2	-	-	uc002izx.4:60613623:60689926:+;uc002izz.4:60558486:60689926:+;uc002jaa.4:60558486:60689926:+;uc010ddp.3:60558486:60689926:+;uc010wpd.2:60558486:60689926:+
chr4:48551219-48551272:mpeak_61890|chr4_48501697_48782316_FRYL_NM_-|	111,44	5,98	2,96	-2,02	4,32E-02	6,37E-01	0	0	111	0	0	0	32	287	702	47	128	31	32	#DIV/0!	Inf	2,31	Inf	FRYL	-	-	uc003gyg.1:48501438:48559682:-;uc003gyi.1:48517046:48567057:-;uc003gyh.1:48501438:48636427:-
chr12:133140189-133140255:mpeak_21899|chr12_133067156_133159556_FBRSL1_NM_+|	50,03	5,97	2,40	-2,48	1,30E-02	3,82E-01	0	8	0	0	0	0	88	80	17	147	124	138	13	#DIV/0!	Inf	-1,14	Inf	FBRSL1	chr12:133140256:+	-	uc001ukf.3:133067156:133160364:+
chr3:142094705-142094791:mpeak_59088|chr3_142030655_142166904_XRN1_NM_-|	43,44	5,96	2,51	-2,37	1,76E-02	4,33E-01	0	6	271	1	7	0	20	58	6	54	76	23	496	8	5,15	-0,87	6,02	XRN1	-	chr3_142375906_-	uc010huu.3:142030352:142131499:-;uc003eus.3:142030352:142166786:-;uc003eut.3:142030352:142166786:-;uc003euu.3:142030352:142166786:-
chr11:68034582-68034637:mpeak_15060|chr11_68030386_68039469_C11orf24_NM_-|	81,09	5,94	2,49	-2,38	1,72E-02	4,30E-01	0	25	0	1	0	0	209	156	17	171	195	199	20	0	4,82	-0,56	5,39	C11orf24	chr11:68034585:-	chr11_68267119_-	-
chr10:101978758-101978813:mpeak_11564|chr10_101949384_101989344_CHUK_NM_-|	45,14	5,92	2,13	-2,78	5,42E-03	2,50E-01	2	4	182	1	1	0	103	23	66	72	43	44	98	2	6,23	0,28	5,95	CHUK	-	-	uc001kqp.3:101949354:101989289:-
chr9:95301734-95301812:mpeak_83112|chr9_95087749_95375300_CENPP_NM_+|	12,82	5,91	2,08	-2,85	4,44E-03	2,35E-01	41	6	0	1	1	1	14	6	0	21	17	46	226	4	3,97	-2,02	5,99	CENPP	-	-	uc004arz.3:95088280:95375431:+;uc010mqx.3:95099869:95375431:+
chr1:28780084-28780134:mpeak_1484|chr1_28696092_28823045_PHACTR4_NM_+|	214,65	5,91	2,18	-2,71	6,76E-03	2,79E-01	22	19	1697	6	5	7	62	442	6	88	101	121	341	6	6,64	0,72	5,93	PHACTR4	-	chr1_28453668_+	uc001bpu.3:28733958:28793287:+;uc001bpw.3:28733958:28823061:+;uc001bpy.3:28764895:28823061:+
chr9:5093227-5093411:mpeak_81690|chr9_4985244_5126683_JAK2_NM_+|	11,63	5,90	2,66	-2,22	2,66E-02	5,21E-01	51	1	17	0	2	0	0	26	0	10	23	10	88	12	5,32	-0,73	6,05	JAK2	chr9:5093277:+	chr9_5093278_+	uc010mhm.3:5021987:5126791:+;uc003ziw.3:5021987:5126791:+
chr3:125093283-125093363:mpeak_58478|chr3_124952783_125094198_ZNF148_NM_-|	354,41	5,89	2,85	-2,07	3,83E-02	6,08E-01	0	2	160	0	0	0	68	190	3366	120	225	120	7	#DIV/0!	Inf	2,96	Inf	ZNF148	-	chr3_125374440_-	-
chr19:55615182-55615274:mpeak_43313|chr19_55602926_55628968_PPP1R12C_NM_-|	37,18	5,88	2,46	-2,39	1,69E-02	4,27E-01	2	8	0	0	0	0	67	92	0	97	84	95	6	#DIV/0!	Inf	-0,80	Inf	PPP1R12C	chr19:55615180:-;chr19:55615208:-	chr19_55103823_-;chr19_55103910_-	uc010yfs.2:55602839:55624858:-;uc002qiy.4:55602839:55628911:-;uc002qix.4:55602839:55628911:-
chr3:124813818-124813971:mpeak_58456|chr3_124802896_124931609_SLC12A8_NM_-|	10,45	5,88	2,72	-2,17	3,03E-02	5,56E-01	0	8	0	0	0	0	11	25	0	21	18	43	44	#DIV/0!	Inf	-1,17	Inf	SLC12A8	-	-	uc003eht.4:124802733:124839669:-;uc010hry.3:124802828:124839525:-;uc003ehv.4:124802733:124930193:-;uc003ehw.4:124802733:124998021:-
chr4:25250229-25250296:mpeak_61461|chr4_25235652_25278635_PI4K2B_NM_+|	12,26	5,87	2,41	-2,44	1,49E-02	4,04E-01	0	3	55	0	1	1	7	13	0	31	11	23	284	6	4,51	-1,70	6,21	PI4K2B	chr4:25250291:+	-	uc003grk.2:25235785:25278809:+
chr2:99198536-99198593:mpeak_46413|chr2_99061320_99203938_INPP4A_NM_+|	13,11	5,83	2,45	-2,37	1,76E-02	4,33E-01	6	6	0	0	0	0	11	48	0	32	21	32	21	#DIV/0!	Inf	-0,52	Inf	INPP4A	chr2:99198595:+	chr2_98582130_+	uc002syy.3:99136511:99204071:+;uc010yvk.2:99136511:99204071:+;uc002syx.3:99136511:99204071:+;uc010fik.3:99136511:99204071:+
chr7:76068398-76068521:mpeak_75666|chr7_76026840_76071158_ZP3_NM_+|	20,18	5,82	2,53	-2,30	2,14E-02	4,69E-01	0	26	0	0	1	0	43	43	6	28	39	57	85	1	5,50	-0,44	5,94	ZP3	-	-	uc003ufc.4:76054434:76071373:+;uc003ufd.4:76054281:76071373:+;uc003ufe.3:76058795:76071373:+
chr8:9473120-9473197:mpeak_78126|chr8_9413444_9634159_TNKS_NM_+|	31,98	5,81	2,34	-2,48	1,31E-02	3,82E-01	3	2	155	8	2	0	23	21	0	55	58	56	241	9	3,94	-1,94	5,88	TNKS	-	chr8_9615677_+	uc011kww.2:9437706:9634246:+;uc011kwv.1:9413449:9567835:+;uc003wss.3:9413449:9634246:+
chr19:337236-337319:mpeak_39857|chr19_306711_344791_MIER2_NM_-|	13,26	5,80	2,56	-2,26	2,37E-02	4,98E-01	14	0	0	9	3	6	0	0	6	29	51	41	259	15	-0,37	-4,45	4,08	MIER2	chr19:337237:-	chr19_337247_-	uc002lok.1:306689:344782:-
chr17:62261159-62261221:mpeak_37378|chr17_62226451_62340683_TEX2_NM_-|	27,02	5,79	2,42	-2,40	1,65E-02	4,22E-01	0	14	0	0	0	0	30	55	61	52	52	61	30	#DIV/0!	Inf	-0,18	Inf	TEX2	chr17:62261143:-	-	uc002jec.3:62226328:62291577:-;uc002jed.3:62226328:62291577:-;uc002jee.3:62226328:62291577:-
chr9:114213711-114213970:mpeak_83686|chr9_114124449_114247025_KIAA0368_NM_-|	179,85	5,76	2,39	-2,42	1,57E-02	4,13E-01	0	4	50	1	0	0	143	399	658	333	370	202	7	0	5,89	0,41	5,49	KIAA0368	-	-	uc010muc.1:114176174:114235198:-;uc004bfe.1:114124309:114247025:-
chr1:46067975-46068046:mpeak_2414|chr1_46049659_46083732_NASP_NM_+|	265,78	5,75	2,26	-2,55	1,09E-02	3,52E-01	0	28	1885	11	11	16	116	287	193	169	230	242	480	6	5,65	-0,10	5,76	NASP	-	chr1_45602319_+	uc010olq.2:46049818:46079851:+;uc021omz.1:46056902:46081143:+;uc001coi.2:46049818:46083813:+;uc001coj.2:46049818:46083813:+;uc010olr.2:46049818:46083813:+
chr7:98015263-98015522:mpeak_76188|chr7_97922908_98030427_BAIAP2L1_NM_-|	111,09	5,74	2,04	-2,82	4,79E-03	2,38E-01	50	5	669	19	3	8	49	122	6	113	147	143	410	8	4,58	-1,19	5,77	BAIAP2L1	-	-	uc003upj.3:97922832:98030164:-
chrX:76909576-76909694:mpeak_86632|chrX_76764107_77041755_ATRX_NM_-|	128,10	5,67	2,15	-2,64	8,27E-03	2,99E-01	8	10	757	2	3	3	16	68	398	69	109	93	161	3	6,51	0,83	5,68	ATRX	-	chrX_77654124_-	uc004ecp.4:76763828:77041487:-;uc004ecq.4:76763828:77041487:-;uc004eco.4:76763828:76940447:-
chr21:38462514-38462581:mpeak_53143|chr21_38445570_38573740_TTC3_NM_+|	11,89	5,66	2,54	-2,23	2,56E-02	5,06E-01	0	5	39	0	0	0	26	37	6	10	13	7	97	#DIV/0!	Inf	1,16	Inf	TTC3	-	-	uc010gne.1:38459557:38516945:+;uc002yvz.3:38459557:38573875:+;uc002ywa.3:38459557:38573875:+;uc002ywb.3:38459557:38573875:+
chr5:138218071-138218123:mpeak_67547|chr5_138089084_138269490_CTNNA1_NM_+|	423,18	5,65	2,58	-2,19	2,87E-02	5,42E-01	0	9	0	0	0	0	1324	597	22	1131	839	1156	1	#DIV/0!	Inf	-0,69	Inf	CTNNA1	-	chr5_138882432_+	uc003ldh.3:138117613:138269778:+;uc011cyx.2:138145734:138269778:+;uc011cyy.2:138145794:138269778:+;uc003ldi.3:138118935:138269778:+;uc003ldj.3:138117613:138269512:+
chr5:179136650-179136700:mpeak_68914|chr5_179125929_179155591_CANX_NM_+|	1403,35	5,64	2,26	-2,50	1,24E-02	3,67E-01	13	2	0	0	0	0	4160	3567	553	2471	2803	3270	0	#DIV/0!	Inf	-0,05	Inf	CANX	chr5:179136701:+	chr5_179709699_+	uc011dgp.2:179125502:179155645:+;uc010jlb.1:179132682:179147561:+;uc003mkk.3:179132682:179155645:+;uc003mkl.3:179132682:179155645:+;uc011dgq.2:179135259:179155645:+
chr13:28790111-28790184:mpeak_22323|chr13_28712642_28866518_PAN3_NM_+|	38,09	5,64	2,25	-2,51	1,20E-02	3,65E-01	5	5	227	3	0	0	10	25	99	13	43	26	176	6	6,23	0,71	5,52	PAN3	-	-	uc010tdo.1:28712794:28846223:+;uc001urz.3:28712794:28866659:+;uc001urx.3:28748416:28866659:+
chr5:112233098-112233158:mpeak_66740|chr5_112214532_112258031_REEP5_NM_-|	534,15	5,62	2,39	-2,35	1,86E-02	4,43E-01	3	11	0	0	0	0	2196	913	39	977	1136	1134	1	#DIV/0!	Inf	-0,05	Inf	REEP5	chr5:112233107:-	chr5_112897410_-	uc011cvw.1:112214482:112256990:-;uc003kqe.1:112214482:112257887:-;uc011cvy.1:112214514:112257887:-
chr11:88070663-88070713:mpeak_15795|chr11_88027676_88070941_CTSC_NM_-|	5,75	5,62	2,61	-2,15	3,14E-02	5,59E-01	6	14	0	0	0	0	8	19	0	13	2	6	76	#DIV/0!	Inf	0,29	Inf	CTSC	-	-	uc001pck.4:88027173:88070840:-;uc001pcm.4:88059600:88070840:-;uc001pcn.4:88059544:88070840:-
chr1:9634797-9634885:mpeak_424|chr1_9599527_9642356_SLC25A33_NM_+|	32,31	5,62	2,10	-2,68	7,37E-03	2,83E-01	22	5	55	1	1	0	74	62	0	70	52	45	41	2	5,34	-0,30	5,64	SLC25A33	-	chr1_9574807_+	uc001apw.3:9599750:9642559:+
chr2:135815830-135815888:mpeak_47481|chr2_135809834_135926114_RAB3GAP1_NM_+|	118,66	5,61	2,33	-2,41	1,59E-02	4,17E-01	7	6	0	0	0	0	191	460	11	211	285	252	3	#DIV/0!	Inf	-0,18	Inf	RAB3GAP1	chr2:135815881:+	chr2_135058346_+	uc010fnf.3:135809877:135926351:+;uc002tuj.3:135809877:135926351:+
chrX:154279931-154280004:mpeak_87859|chrX_154255063_154282869_FUNDC2_NM_+|	112,63	5,61	2,29	-2,45	1,41E-02	3,95E-01	22	6	813	6	6	0	163	118	0	58	89	68	199	6	6,01	0,39	5,62	FUNDC2	-	chrX_155051734_+	uc004fmw.3:154255213:154282947:+
chr22:19493160-19493329:mpeak_53839|chr22_19467348_19508003_CDC45_NM_+|	124,12	5,59	2,80	-1,99	4,62E-02	6,58E-01	0	11	0	0	0	0	460	183	0	252	240	344	3	#DIV/0!	Inf	-0,38	Inf	CDC45	chr22:19493324:+	-	uc011agz.1:19467491:19502530:+;uc011aha.2:19467491:19506431:+;uc002zpr.3:19467491:19506431:+;uc002zpt.3:19467491:19506431:+
chr9:106891956-106892129:mpeak_83498|chr9_106856540_106901419_SMC2_NM_+|	46,86	5,58	2,14	-2,61	9,07E-03	3,15E-01	4	5	227	4	12	0	12	49	6	68	105	70	354	7	3,79	-1,87	5,66	SMC2	-	-	uc004bbv.3:106857665:106901596:+;uc004bbw.3:106857665:106901596:+;uc011lvl.2:106857665:106901596:+;uc004bbx.3:106857665:106901596:+
chr20:25479527-25479582:mpeak_50969|chr20_25434278_25566153_NINL_NM_-|	7,22	5,56	2,58	-2,16	3,10E-02	5,58E-01	5	8	0	0	0	0	4	30	0	19	14	7	39	#DIV/0!	Inf	-0,24	Inf	NINL	chr20:25479532:-	chr20_25498891_-	uc010ztf.1:25471986:25520694:-;uc002wux.1:25434086:25507223:-;uc010gdn.1:25434086:25507223:-;uc010gdo.1:25459497:25490342:-
chr16:20749229-20749287:mpeak_31095|chr16_20748608_20753286_THUMPD1_NM_-|	37,02	5,54	2,60	-2,13	3,28E-02	5,63E-01	2	0	94	0	1	1	23	122	0	55	106	39	66	2	5,24	-0,46	5,70	THUMPD1	-	chr16_20737952_-	uc010vaz.2:20748201:20749243:-;uc002dhp.3:20748201:20753061:-;uc002dho.3:20748201:20753061:-
chr7:132566056-132566110:mpeak_77206|chr7_132470421_132766828_CHCHD3_NM_-|	31,64	5,53	2,39	-2,31	2,09E-02	4,66E-01	0	12	0	0	0	0	83	50	39	79	63	54	20	#DIV/0!	Inf	-0,20	Inf	CHCHD3	chr7:132566054:-	-	uc003vre.3:132470397:132766697:-;uc022alw.1:132470397:132766697:-
chr14:70236430-70236760:mpeak_25663|chr14_70233828_70237910_SRSF5_NM_+|	424,85	5,52	2,37	-2,33	2,01E-02	4,58E-01	9	4	752	1	0	5	58	1198	1896	325	378	472	24	1	6,99	1,42	5,57	SRSF5	chr14:70236568:+;chr14:70236758:+	chr14_69769792_+;chr14_69769849_+;chr14_69770076_+	uc001xll.3:70234873:70238178:+;uc001xlo.3:70234873:70238178:+;uc001xlp.3:70234873:70238178:+
chr13:79916817-79916969:mpeak_23312|chr13_79894845_79980356_RBM26_NM_-|	41,08	5,52	2,57	-2,15	3,18E-02	5,60E-01	3	0	72	1	0	0	17	86	188	40	45	41	39	2	6,38	1,21	5,17	RBM26	-	-	uc001vkx.2:79894755:79942895:-;uc010tia.2:79896447:79928702:-;uc001vky.2:79894755:79979909:-;uc001vkz.2:79894755:79979909:-;uc001vla.2:79894755:79979909:-
chr9:128232804-128232863:mpeak_84272|chr9_128201291_128469513_MAPKAP1_NM_-|	81,17	5,51	2,70	-2,04	4,12E-02	6,26E-01	0	0	83	0	1	0	181	50	293	100	159	108	48	1	6,17	0,51	5,66	MAPKAP1	-	-	uc011lzt.2:128201165:128347913:-;uc011lzu.2:128201165:128347928:-;uc011lzv.2:128201165:128347913:-;uc004bpv.3:128201165:128434853:-;uc004bpw.3:128201165:128347928:-;uc004bpx.3:128201165:128347928:-;uc004bpy.3:128201165:128434853:-;uc004bpz.3:128201165:128434853:-
chr18:9103749-9103806:mpeak_38569|chr18_9102627_9134183_NDUFV2_NM_+|	201,59	5,51	2,60	-2,12	3,38E-02	5,64E-01	0	11	0	0	0	0	622	457	11	361	414	543	3	#DIV/0!	Inf	-0,28	Inf	NDUFV2	chr18:9103805:+	chr18_9103806_+	uc002knu.3:9102741:9134277:+
chr8:128933149-128933252:mpeak_81005|chr8_128902873_129113225_PVT1_NR_+|	6,75	5,50	2,51	-2,20	2,81E-02	5,36E-01	8	4	0	0	0	0	13	18	0	9	7	21	40	#DIV/0!	Inf	-0,25	Inf	PVT1	-	chr8_127921006_+	-
chr10:101474577-101474656:mpeak_11518|chr10_101474475_101492423_COX15_NM_-|	78,45	5,44	2,34	-2,33	2,00E-02	4,58E-01	7	4	0	0	0	0	233	196	6	162	144	190	4	#DIV/0!	Inf	-0,19	Inf	COX15	chr10:101474578:-	-	uc001kqb.4:101474343:101491806:-;uc001kqc.4:101473170:101491806:-;uc010qpj.2:101474343:101486769:-
chr19:5611524-5611712:mpeak_40276|chr19_5587410_5622938_SAFB2_NM_-|	105,14	5,43	2,26	-2,41	1,62E-02	4,19E-01	4	5	724	11	8	17	61	95	0	129	84	122	312	11	4,37	-1,10	5,47	SAFB2	-	-	uc002mcd.3:5587253:5622726:-
chr19:5562641-5562715:mpeak_40265|chr19_5561410_5568045_TINCR_NR_-|	7,41	5,42	2,45	-2,21	2,69E-02	5,24E-01	27	2	0	6	6	16	0	0	0	9	10	13	#DIV/0!	88	-0,02	-Inf	Inf	TINCR	chr19:5562646:-	chr19_5562636_-	-
chr19:1638887-1638937:mpeak_40010|chr19_1611848_1652328_TCF3_NM_-|	182,72	5,41	2,51	-2,16	3,11E-02	5,58E-01	17	0	0	0	1	0	435	403	28	384	409	517	6	0	4,92	-0,60	5,51	TCF3	-	-	uc002ltt.4:1611705:1650247:-;uc002ltq.3:1611705:1650247:-;uc002ltr.3:1611705:1650247:-
chr10:51885161-51885218:mpeak_10076|chr10_51827647_51892565_FAM21A_NM_+|	27,58	5,39	2,38	-2,27	2,32E-02	4,90E-01	0	7	171	1	2	1	15	58	0	25	32	18	242	5	5,47	-0,03	5,50	FAM21A	-	-	uc001jja.1:51850547:51893260:+;uc001jjb.3:51827765:51892705:+;uc010qhi.2:51827765:51892705:+;uc010qhj.2:51827765:51892705:+;uc009xoq.3:51837885:51892705:+
chr12:53861582-53861696:mpeak_18960|chr12_53845885_53873189_PCBP2_NM_+|	2474,30	5,37	2,20	-2,44	1,48E-02	4,04E-01	2	6	1227	7	5	2	5014	2145	12172	2801	3218	3092	6	0	6,45	1,09	5,37	PCBP2	chr12:53861696:+	chr12_53467870_+;chr12_53467910_+	uc001sdc.4:53848584:53873226:+;uc001sdb.4:53848584:53873226:+;uc001sdl.4:53848584:53873226:+;uc001sde.4:53848584:53873226:+;uc001sdi.4:53848584:53873226:+;uc001sdd.4:53848584:53873226:+;uc001sdf.4:53848584:53873226:+;uc010soi.2:53861028:53873226:+;uc010soj.2:53861028:53873226:+;uc001sdk.4:53858597:53873226:+
chr6:160100798-160100893:mpeak_73477|chr6_160100330_160114353_SOD2_NM_-|	19,31	5,37	2,46	-2,18	2,92E-02	5,46E-01	9	3	0	0	0	0	81	27	0	34	41	37	12	#DIV/0!	Inf	-0,07	Inf	SOD2	-	-	-
chr5:14160662-14160713:mpeak_64674|chr5_14143828_14507988_TRIO_NM_+|	91,92	5,34	2,65	-2,01	4,43E-02	6,41E-01	0	2	66	0	0	0	36	129	685	54	75	56	12	#DIV/0!	Inf	2,20	Inf	TRIO	-	-	uc003jff.3:14143834:14508531:+
chr10:93711146-93711314:mpeak_11167|chr10_93683735_93788546_BTAF1_NM_+|	19,74	5,34	2,49	-2,14	3,20E-02	5,60E-01	0	8	133	7	5	2	0	14	0	17	41	9	512	22	3,26	-2,28	5,55	BTAF1	-	chr10_91951439_+	uc001khr.3:93683833:93788690:+
chr2:159948264-159948316:mpeak_47905|chr2_159825145_160086088_TANC1_NM_+|	30,28	5,33	2,07	-2,58	9,96E-03	3,37E-01	15	5	0	0	2	1	2	39	6	111	109	73	66	2	2,67	-2,64	5,32	TANC1	chr2:159948315:+	chr2_159091803_+	uc010fol.1:159922422:160035672:+;uc010fom.1:159922422:160084476:+;uc010zcm.2:159922422:160086129:+;uc002uag.3:159922422:160087523:+
chr2:47612818-47612944:mpeak_44991|chr2_47596286_47613710_EPCAM_NM_+|	645,29	5,33	2,60	-2,05	4,06E-02	6,22E-01	26	1	0	0	1	0	3631	302	17	1356	1193	1219	1	0	5,53	0,07	5,46	EPCAM	chr2:47612868:+	chr2_47385727_+;chr2_47385800_+	uc002rvx.3:47596644:47613752:+
chrX:24760132-24760244:mpeak_85601|chrX_24712063_25013921_POLA1_NM_+|	27,46	5,32	2,26	-2,35	1,85E-02	4,43E-01	3	2	138	4	2	0	27	40	6	66	25	19	199	7	4,75	-0,61	5,36	POLA1	-	-	uc004dbl.3:24712078:25014067:+
chr10:22217971-22218124:mpeak_9452|chr10_22045684_22292650_DNAJC1_NM_-|	70,35	5,32	2,17	-2,46	1,40E-02	3,95E-01	11	0	122	6	2	3	109	33	6	164	201	187	134	2	3,49	-1,90	5,38	DNAJC1	-	-	uc001irc.3:22045615:22292363:-
chr9:5092126-5092195:mpeak_81686|chr9_4985244_5126683_JAK2_NM_+|	15,14	5,28	2,63	-2,01	4,44E-02	6,41E-01	100	8	0	4	0	1	0	26	0	10	23	10	208	16	4,58	-0,73	5,31	JAK2	-	-	uc010mhm.3:5021987:5126791:+;uc003ziw.3:5021987:5126791:+
chr2:220010285-220010352:mpeak_49522|chr2_219941177_220025587_NHEJ1_NM_-|	11,11	5,28	2,54	-2,08	3,80E-02	6,07E-01	15	2	0	0	0	0	25	42	0	19	17	14	25	#DIV/0!	Inf	0,41	Inf	NHEJ1	chr2:220010295:-	chr2_219145561_-	uc002vjp.4:219941102:220023084:-
chr2:152683554-152683638:mpeak_47806|chr2_152659838_152685009_ARL5A_NM_-|	86,84	5,28	2,61	-2,02	4,33E-02	6,37E-01	0	19	0	0	0	0	338	272	11	98	206	98	9	#DIV/0!	Inf	0,63	Inf	ARL5A	chr2:152683553:-;chr2:152683584:-	chr2_151827065_-	uc002txx.1:152659789:152684690:-
chr9:131674262-131674340:mpeak_84526|chr9_131644390_131678374_LRRC8A_NM_+|	27,90	5,27	2,43	-2,17	3,03E-02	5,56E-01	0	8	0	0	0	0	37	84	17	83	48	58	17	#DIV/0!	Inf	-0,46	Inf	LRRC8A	chr9:131674321:+	chr9_128912041_+	uc004bwl.4:131669443:131678650:+;uc010myp.3:131669443:131678650:+;uc010myq.3:131669443:131678650:+
chr5:179044958-179045066:mpeak_68895|chr5_179041960_179050722_HNRNPH1_NM_-mpeak_68895|chr5_179041960_179050722_HNRNPH1_NM_-||	2135,80	5,26	2,56	-2,06	3,98E-02	6,17E-01	3	1	83	0	0	0	1967	1079	18954	999	1402	1142	0	#DIV/0!	Inf	2,63	Inf	HNRNPH1	-	chr5_179617919_-;chr5_179618051_-	uc021yjd.1:179041841:179050134:-;uc003mkf.5:179042546:179050134:-;uc003mkg.5:179042546:179048013:-;uc003mke.4:179042546:179050134:-;uc003mkh.4:179042546:179050134:-
chr7:127573694-127573745:mpeak_76986|chr7_127292201_127732044_SND1_NM_+|	522,69	5,26	2,31	-2,28	2,27E-02	4,85E-01	0	11	0	0	0	0	1020	846	1227	1044	970	1154	1	#DIV/0!	Inf	-0,03	Inf	SND1	chr7:127573748:+	chr7_127933692_+	uc003vmi.3:127292427:127732110:+;uc010lle.3:127361343:127732110:+
chr9:131869612-131869671:mpeak_84543|chr9_131857891_131873070_CRAT_NM_-|	19,91	5,25	2,30	-2,28	2,26E-02	4,85E-01	4	14	0	0	1	0	57	12	0	25	41	85	27	1	4,15	-1,13	5,28	CRAT	chr9:131869613:-;chr9:131869670:-	chr9_129107334_-	uc004bxk.4:131857675:131870320:-;uc004bxh.3:131857675:131872788:-
chr7:99001032-99001186:mpeak_76230|chr7_98994363_99006305_PDAP1_NM_-|	479,25	5,23	2,37	-2,20	2,76E-02	5,31E-01	1	2	1658	4	4	7	602	177	2283	292	357	364	54	1	6,83	1,60	5,23	PDAP1	-	chr7_99403468_-;chr7_99403506_-	uc003uqe.3:98994304:99006171:-
chr7:132558582-132558672:mpeak_77205|chr7_132470421_132766828_CHCHD3_NM_-|	35,36	5,21	2,28	-2,29	2,22E-02	4,80E-01	1	54	0	0	2	0	83	50	39	79	63	54	48	3	4,98	-0,20	5,19	CHCHD3	chr7:132558585:-	-	uc003vre.3:132470397:132766697:-;uc022alw.1:132470397:132766697:-
chr5:134074431-134074487:mpeak_67346|chr5_134074169_134086448_CAMLG_NM_+|	151,29	5,18	2,07	-2,51	1,22E-02	3,65E-01	9	6	210	4	1	2	322	406	6	263	279	308	31	1	4,99	-0,21	5,20	CAMLG	-	chr5_134738792_+	uc003kzt.3:134074310:134086640:+;uc003kzu.3:134074310:134086453:+
chr3:108366912-108366969:mpeak_57978|chr3_108308336_108412206_DZIP3_NM_+|	13,49	5,16	2,37	-2,18	2,96E-02	5,50E-01	4	6	50	0	2	0	4	41	0	12	17	26	88	9	5,11	-0,27	5,39	DZIP3	chr3:108366921:+	chr3_108648073_+	uc003dxg.1:108353732:108373241:+;uc003dxd.3:108324253:108409744:+;uc003dxf.1:108324253:108409744:+;uc011bhm.2:108330076:108409744:+
chr18:29432567-29432631:mpeak_39085|chr18_29410952_29523091_TRAPPC8_NM_-|	34,22	5,16	2,49	-2,07	3,85E-02	6,08E-01	0	3	265	3	3	0	3	23	50	20	25	15	533	15	5,45	0,32	5,13	TRAPPC8	-	-	uc002kxb.4:29410717:29511481:-;uc002kxc.4:29410717:29522727:-
chr3:27493900-27493983:mpeak_56027|chr3_27418336_27525911_SLC4A7_NM_-|	130,56	5,12	2,04	-2,51	1,22E-02	3,65E-01	40	30	1172	25	16	9	29	83	0	50	66	47	744	31	4,62	-0,55	5,17	SLC4A7	-	-	uc003cdv.4:27418254:27498174:-;uc003cdw.4:27418254:27498174:-;uc011axb.3:27418254:27525617:-;uc011aww.3:27418254:27525617:-;uc011awx.3:27418254:27525617:-;uc021wun.2:27418254:27525617:-;uc003cdu.5:27418254:27525617:-;uc011axa.3:27418254:27525617:-;uc011awy.3:27418254:27525617:-;uc010hfm.3:27465482:27525617:-
chr4:174153914-174153968:mpeak_64077|chr4_174089903_174242730_GALNT7_NM_+|	99,72	5,11	2,40	-2,13	3,32E-02	5,63E-01	14	1	0	0	0	0	453	20	221	154	205	129	3	#DIV/0!	Inf	0,51	Inf	GALNT7	chr4:174153970:+	chr4_173232816_+	uc003isz.4:174089986:174242868:+
chr12:48528931-48529005:mpeak_18472|chr12_48499655_48539346_PFKM_NM_+|	64,42	5,10	2,34	-2,18	2,93E-02	5,46E-01	0	10	0	0	0	0	130	126	133	100	95	179	8	#DIV/0!	Inf	0,05	Inf	PFKM	chr12:48529001:+	chr12_48135217_+	uc001rrb.2:48501156:48539491:+;uc001rrc.3:48516557:48539491:+;uc001rre.2:48516557:48539491:+;uc021qxj.1:48516557:48539491:+;uc001rrg.2:48516557:48539491:+
chr3:140955176-140955227:mpeak_59016|chr3_140950666_141011109_PXYLP1_NM_+|	5,33	5,10	2,24	-2,28	2,28E-02	4,85E-01	11	3	0	2	0	2	2	2	0	14	11	16	346	13	1,98	-3,32	5,30	PXYLP1	chr3:140955231:+	chr3_141236385_+	-
chr4:100001127-100001214:mpeak_62810|chr4_99993592_100009939_ADH5_NM_-|	121,76	5,08	2,18	-2,33	2,00E-02	4,58E-01	2	5	470	5	10	6	211	163	6	159	210	214	126	4	4,49	-0,62	5,11	ADH5	chr4:100001137:-;chr4:100001170:-	-	uc003hui.3:99993567:100009851:-;uc003huk.1:99997415:100009851:-
chr16:2218458-2218508:mpeak_30199|chr16_2205798_2226560_TRAF7_NM_+|	172,18	5,08	2,58	-1,97	4,87E-02	6,67E-01	0	8	0	0	0	0	592	359	11	303	401	392	3	#DIV/0!	Inf	-0,19	Inf	TRAF7	chr16:2218511:+	chr16_2168515_+	uc002cow.3:2213921:2226575:+
chr6:150142983-150143098:mpeak_73131|chr6_150141839_150185480_LRP11_NM_-|	81,56	5,05	2,50	-2,02	4,30E-02	6,37E-01	14	2	0	0	0	0	294	135	0	156	218	159	4	0	5,14	-0,31	5,45	LRP11	-	chr6_149821889_-;chr6_149821944_-	uc003qng.2:150141684:150185156:-
chr15:78585567-78585628:mpeak_29205|chr15_78575863_78592068_WDR61_NM_-|	109,38	5,04	2,19	-2,30	2,12E-02	4,68E-01	4	3	66	3	0	1	363	93	6	268	194	311	16	1	4,33	-0,74	5,07	WDR61	-	-	uc010una.1:78584916:78588028:-;uc002bdn.3:78575773:78588028:-;uc002bdo.3:78575773:78588028:-
chr17:34171977-34172050:mpeak_35398|chr17_34136458_34173909_TAF15_NM_+|	208,36	5,03	2,24	-2,25	2,44E-02	5,01E-01	0	6	171	3	0	1	439	536	348	309	340	347	20	1	5,44	0,41	5,03	TAF15	chr17:34172042:+	chr17_35845038_+	uc002hkc.4:34136573:34173949:+;uc002hkd.4:34136573:34173949:+
chr17:35910597-35910661:mpeak_35499|chr17_35879174_35969486_SYNRG_NM_-mpeak_35499|chr17_35879174_35969486_SYNRG_NM_-||	86,81	5,02	2,16	-2,32	2,03E-02	4,62E-01	6	5	182	4	7	1	58	215	0	150	235	178	47	2	4,03	-1,04	5,07	SYNRG	chr17:35910602:-	chr17_37550503_-	uc010wde.2:35879042:35969403:-;uc002hoa.3:35879042:35969403:-;uc010wdf.2:35879042:35969403:-;uc002hoc.3:35879042:35969403:-;uc002hoe.3:35879042:35969403:-;uc002hod.3:35879042:35969403:-;uc010wdg.2:35879042:35969403:-;uc002hob.3:35879042:35969403:-;uc002hof.3:35902065:35936475:-
chr3:169201316-169201763:mpeak_59694|chr3_168802831_169381563_MECOM_NM_-|	1160,92	4,99	2,07	-2,41	1,61E-02	4,19E-01	5352	2900	862	1743	1378	1682	0	0	0	2	9	3	#DIV/0!	36356	0,92	-Inf	Inf	MECOM	chr3:169201402:-;chr3:169201586:-	chr3_169483809_-	uc011bpl.1:168867408:169381160:-;uc011bpj.1:168802696:169381160:-;uc010hwn.2:168819849:169381160:-
chr22:38890625-38890708:mpeak_54682|chr22_38882445_38902345_DDX17_NM_-|	450,75	4,99	2,36	-2,11	3,46E-02	5,72E-01	11	1	260	7	0	12	376	1171	28	957	1059	1530	17	1	3,85	-1,17	5,02	DDX17	-	-	uc003avy.4:38881939:38902242:-;uc003avx.4:38881939:38902242:-;uc011anu.2:38886364:38903621:-
chr8:10094891-10094952:mpeak_78141|chr8_9911778_10285657_MSRA_NM_+|	286,99	4,98	2,15	-2,32	2,04E-02	4,62E-01	82	15	3002	41	30	60	53	37	0	22	53	49	2303	106	4,55	-0,47	5,03	MSRA	-	-	uc003wsx.3:9912026:10285822:+;uc011kwx.2:9912026:10285822:+;uc011kwy.1:9953540:10177547:+;uc003wsy.3:10065398:10285822:+;uc003wsz.3:9953540:10285822:+
chr3:172473249-172473346:mpeak_59838|chr3_172468474_172537937_ECT2_NM_+|	48,75	4,95	2,43	-2,03	4,20E-02	6,33E-01	0	2	199	4	1	5	39	99	0	61	91	84	146	5	4,22	-0,78	5,00	ECT2	-	-	uc003fil.2:172472320:172538027:+;uc003fik.2:172472320:172538027:+;uc003fii.3:172472320:172538027:+;uc003fih.3:172472320:172538027:+;uc003fij.2:172472320:172538027:+
chr9:72895671-72895816:mpeak_82636|chr9_72873877_72967106_SMC5_NM_+|	33,05	4,93	2,37	-2,08	3,73E-02	6,00E-01	4	2	66	1	2	0	14	133	0	47	72	55	33	2	4,78	-0,24	5,02	SMC5	-	chr9_70280789_+;chr9_70280882_+	uc004ahr.2:72873994:72967247:+
chr10:112343137-112343301:mpeak_11953|chr10_112327448_112363988_SMC3_NM_+|	74,34	4,93	2,20	-2,24	2,51E-02	5,01E-01	5	55	625	12	16	7	2	63	0	32	56	19	700	33	4,28	-0,72	5,00	SMC3	-	chr10_110583396_+;chr10_110583428_+;chr10_110583516_+	uc001kze.3:112327574:112364060:+
chr6:170108848-170108898:mpeak_73658|chr6_170104184_170124106_PHF10_NM_-|	38,75	4,92	2,21	-2,23	2,60E-02	5,14E-01	8	5	6	2	0	0	97	31	0	105	93	118	10	2	3,36	-1,30	4,66	PHF10	-	-	uc011egy.2:170104098:170124027:-;uc011egz.2:170104098:170124027:-
chr14:105836427-105836546:mpeak_26990|chr14_105767147_105860890_PACS2_NM_+|	53,71	4,91	2,48	-1,98	4,75E-02	6,61E-01	2	10	0	0	1	0	206	46	0	106	136	138	4,59	0	4,33	-0,59	4,92	PACS2	chr14:105836459:+;chr14:105836495:+	chr14_105370156_+	uc001yqs.2:105814911:105861009:+;uc001yqu.3:105781255:105861009:+;uc001yqt.3:105781255:105861009:+
chr12:76449799-76449962:mpeak_19952|chr12_76442244_76478813_NAP1L1_NM_-|	361,85	4,89	2,15	-2,28	2,27E-02	4,85E-01	15	2	315	7	1	1	1591	515	44	613	724	512	15	1	5,09	0,22	4,88	NAP1L1	chr12:76449894:-	-	uc001sxw.2:76442208:76467999:-;uc001sxx.2:76442208:76467999:-;uc010sty.1:76442208:76461230:-;uc001sxz.2:76442208:76461230:-;uc010stz.1:76442208:76449821:-;uc010sua.1:76443242:76467999:-;uc001syb.3:76443517:76467999:-
chr12:112525976-112526031:mpeak_20997|chr12_112467457_112546635_NAA25_NM_-|	41,54	4,88	2,26	-2,16	3,08E-02	5,58E-01	0	8	6	0	0	0	40	93	144	71	75	62	7	#DIV/0!	Inf	0,41	Inf	NAA25	-	-	uc001ttm.3:112467334:112546577:-;uc009zvz.2:112477032:112530914:-;uc009zwa.2:112477032:112546577:-
chr2:136266612-136266669:mpeak_47511|chr2_135958010_136288806_ZRANB3_NM_-|	14,09	4,88	2,43	-2,01	4,46E-02	6,42E-01	3	1	105	2	3	2	0	15	0	4	21	11	237	21	3,85	-1,26	5,11	ZRANB3	chr2:136266609:-	chr2_135509042_-	-
chr7:151038889-151038942:mpeak_77780|chr7_151038846_151074132_NUB1_NM_+|	23,48	4,86	2,36	-2,06	3,97E-02	6,17E-01	4	7	0	1	0	0	61	47	0	31	64	66	11	2	3,68	-0,57	4,25	NUB1	-	-	uc022aqc.1:151038862:151049227:+;uc003wjw.4:151038862:151074311:+;uc003wjx.3:151038862:151074311:+
chr17:77753169-77753234:mpeak_38053|chr17_77751976_77757530_CBX2_NM_+|	111,58	4,86	1,92	-2,53	1,13E-02	3,55E-01	1	5	17	5	0	4	48	30	6	376	327	520	27	1	1,26	-3,87	5,13	CBX2	-	-	uc002jxb.2:77752034:77755948:+;uc002jxc.3:77752034:77758841:+
chr15:35256428-35256489:mpeak_27368|chr15_35149307_35261995_AQR_NM_-|	132,19	4,86	2,28	-2,13	3,33E-02	5,63E-01	4	15	674	11	5	10	72	347	0	164	195	89	110	6	4,79	-0,10	4,88	AQR	-	-	uc001ziv.3:35148992:35261814:-
chr16:18863448-18863548:mpeak_30995|chr16_18820968_18937726_SMG1_NM_-|	206,24	4,85	2,16	-2,24	2,51E-02	5,01E-01	2	9	1305	8	15	4	111	359	238	154	166	104	186	6	5,59	0,74	4,86	SMG1	-	-	uc010bwa.3:18820890:18871023:-;uc010bwb.3:18820890:18903668:-;uc002dfm.3:18820890:18937363:-
chr8:97614680-97614763:mpeak_80099|chr8_97505881_97621612_SDC2_NM_+|	47,83	4,84	2,16	-2,24	2,48E-02	5,01E-01	6	5	0	0	0	0	101	190	33	86	68	84	5,29	#DIV/0!	Inf	0,44	Inf	SDC2	-	chr8_96602473_+	uc011lgu.1:97605734:97621776:+;uc003yhv.1:97506499:97621776:+
chr2:174091818-174091877:mpeak_48268|chr2_173940564_174130777_ZAK_NM_+|	130,00	4,83	1,85	-2,61	9,01E-03	3,14E-01	37	67	752	11	18	20	84	156	6	114	204	92	349	12	4,12	-0,74	4,87	ZAK	chr2:174091874:+	chr2_173227168_+	uc002uhz.3:173955759:174131478:+
chr10:46280300-46280358:mpeak_9976|chr10_46222647_46287708_FAM21C_NM_+|	23,77	4,82	2,29	-2,11	3,52E-02	5,79E-01	0	11	144	3	3	2	7	40	0	21	39	16	325	11	4,27	-0,67	4,94	FAM21C	-	-	uc010qfj.2:46274535:46287848:+;uc001jcu.3:46222765:46287848:+;uc010qfk.2:46222765:46287848:+;uc010qfi.2:46222765:46287848:+
chr20:13740334-13740453:mpeak_50717|chr20_13695814_13765579_ESF1_NM_-|	119,69	4,82	2,41	-2,01	4,49E-02	6,43E-01	2	46	1299	6	8	2	0	27	28	3	13	2	1642	89	6,38	1,58	4,79	ESF1	-	-	uc002woj.3:13695520:13763786:-;uc002wok.2:13695520:13763786:-
chr1:228823222-228823288:mpeak_8170|chr1_228780393_228879031_RHOU_NR_+|	23,34	4,76	2,00	-2,39	1,70E-02	4,27E-01	149	20	17	29	15	14	0	3	0	16	13	5	2335	170	1,69	-3,68	5,37	RHOU	-	-	-
chrX:70618414-70618583:mpeak_86474|chrX_70586088_70749562_TAF1_NR_+mpeak_86474|chrX_70586088_70683673_TAF1_NM_+||	79,77	4,75	1,95	-2,43	1,49E-02	4,04E-01	6	14	210	6	4	1	12	221	66	149	134	133	77	3	4,30	-0,48	4,77	TAF1	-	chrX_71398574_+;chrX_71398615_+;chrX_71398668_+	uc004dzt.4:70586164:70683896:+;uc004dzu.4:70586164:70683896:+;uc004dzv.4:70608140:70683896:+
chr3:160665685-160665749:mpeak_59611|chr3_160473995_160786598_PPM1L_NM_+|	20,41	4,68	2,07	-2,26	2,35E-02	4,96E-01	123	6	6	6	1	2	29	7	0	13	22	30	249	14	3,85	-0,86	4,71	PPM1L	-	chr3_160947947_+	uc003fdr.3:160474096:160786945:+;uc003fdt.3:160560062:160786945:+
chr7:98479370-98479509:mpeak_76193|chr7_98476112_98609693_TRRAP_NM_+|	40,12	4,67	2,14	-2,18	2,90E-02	5,45E-01	340	32	11	44	19	18	2	0	0	7	4	4	6259	543	2,24	-2,87	5,11	TRRAP	chr7:98479507:+	chr7_98881783_+;chr7_98881804_+;chr7_98881884_+	uc003upp.3:98478773:98609978:+;uc011kis.2:98478773:98609978:+
chr10:94372780-94372866:mpeak_11206|chr10_94352824_94413421_KIF11_NM_+|	35,17	4,67	2,18	-2,14	3,25E-02	5,61E-01	3	5	83	2	2	0	15	127	6	71	69	39	61	3	4,47	-0,27	4,74	KIF11	-	-	uc001kic.3:94353132:94413553:+
chr3:98600228-98600460:mpeak_57754|chr3_98518685_98620533_DCBLD2_NM_-|	133,86	4,63	2,22	-2,09	3,69E-02	5,99E-01	7	10	6	0	0	0	255	879	28	138	166	117	2	#DIV/0!	Inf	1,46	Inf	DCBLD2	chr3:98600226:-;chr3:98600291:-	chr3_98881386_-;chr3_98881449_-	uc003dtd.3:98518215:98620170:-;uc003dte.3:98518215:98620170:-
chr20:34450923-34451042:mpeak_51303|chr20_34359922_34535406_PHF20_NM_+|	41,53	4,61	2,20	-2,10	3,62E-02	5,90E-01	13	10	11	0	0	1	19	233	6	50	88	67	13	1	5,21	0,33	4,88	PHF20	-	-	uc002xel.1:34446277:34457472:+;uc002xei.1:34389444:34501268:+;uc010gfo.1:34389444:34501268:+;uc002xej.1:34435284:34501268:+;uc002xek.1:34389444:34535549:+
chr12:56307533-56307668:mpeak_19134|chr12_56296139_56321697_WIBG_NM_-|	52,59	4,61	1,99	-2,32	2,06E-02	4,64E-01	34	7	0	6	1	12	20	25	0	194	164	167	88	4	1,10	-3,52	4,62	WIBG	chr12:56307530:-;chr12:56307610:-	chr12_55913726_-;chr12_55913810_-;chr12_55913873_-	uc001sie.1:56295655:56320893:-;uc001sif.1:56295655:56321545:-
chr16:27694325-27694380:mpeak_31337|chr16_27561467_27789894_KIAA0556_NM_+|	16,24	4,59	2,13	-2,16	3,09E-02	5,58E-01	2	7	0	1	0	1	21	15	0	42	58	47	26	2	2,37	-2,02	4,39	KIAA0556	chr16:27694376:+	chr16_27683054_+	uc002dox.1:27643921:27738590:+;uc002dow.3:27561491:27789950:+
chr10:27408217-27408334:mpeak_9564|chr10_27401049_27443349_YME1L1_NM_-|	174,21	4,58	2,08	-2,20	2,78E-02	5,31E-01	13	5	497	11	8	5	585	137	17	280	318	213	70	3	4,46	-0,14	4,59	YME1L1	-	-	uc001iti.3:27400905:27443139:-;uc001itj.3:27400905:27443139:-;uc010qdl.2:27400905:27443139:-
chr7:745211-745278:mpeak_73729|chr7_590239_767313_PRKAR1B_NM_-|	62,61	4,54	2,19	-2,07	3,81E-02	6,08E-01	9	4	0	0	1	0	132	114	6	132	163	192	8	1	3,49	-0,96	4,45	PRKAR1B	chr7:745227:-	chr7_705574_-	uc003siu.2:590066:751142:-;uc021zyi.1:590066:751142:-;uc003siv.3:590066:751142:-;uc021zyj.1:590066:751142:-;uc021zyk.1:590066:751142:-;uc003siw.2:590066:751142:-
chr17:18811986-18812044:mpeak_34726|chr17_18759611_18833852_PRPSAP2_NM_+|	159,37	4,54	1,94	-2,34	1,94E-02	4,53E-01	16	10	636	8	4	7	179	77	481	176	146	173	90	4	5,11	0,57	4,54	PRPSAP2	-	chr17_18908729_+	uc002guo.2:18781029:18834011:+;uc010vyi.2:18769146:18834011:+;uc002gup.2:18769146:18834011:+;uc010vyj.2:18781029:18834011:+;uc010vyk.2:18769146:18834011:+
chr1:6732239-6732390:mpeak_331|chr1_6695760_6761966_DNAJC11_NM_-|	45,65	4,48	2,09	-2,15	3,16E-02	5,60E-01	12	5	0	1	0	0	89	159	50	75	75	83	9	1	4,24	0,36	3,88	DNAJC11	chr1:6732237:-;chr1:6732269:-	chr1_6672179_-	uc001aof.2:6695734:6761860:-;uc001aog.2:6695734:6761860:-;uc010nzu.1:6695734:6740973:-
chr1:33234446-33234501:mpeak_1715|chr1_33207511_33238465_KIAA1522_NM_+|	25,95	4,47	2,21	-2,02	4,33E-02	6,37E-01	9	9	0	0	0	4	15	37	0	77	86	74	35	5	2,29	-2,19	4,48	KIAA1522	chr1:33234497:+	chr1_32768893_+	uc001bvv.2:33231370:33238488:+;uc010ohn.1:33231370:33238488:+;uc001bvu.1:33207555:33238488:+;uc010ohm.1:33219690:33238488:+
chr14:35252259-35252448:mpeak_24453|chr14_35222910_35344853_BAZ1A_NM_-|	50,61	4,45	1,94	-2,29	2,19E-02	4,75E-01	11	49	464	8	16	8	5	15	0	12	13	6	1706	102	4,06	-0,60	4,65	BAZ1A	chr14:35252249:-	chr14_34783048_-;chr14_34783163_-	uc001wsk.3:35222713:35343810:-;uc001wsl.3:35222713:35343810:-
chr12:76462700-76462802:mpeak_19958|chr12_76442244_76478813_NAP1L1_NM_-|	421,84	4,45	1,92	-2,32	2,06E-02	4,64E-01	57	31	934	18	10	12	1591	515	44	613	724	512	48	2	4,68	0,22	4,46	NAP1L1	chr12:76462668:-;chr12:76462701:-	chr12_76068981_-	uc001sxw.2:76442208:76467999:-;uc001sxx.2:76442208:76467999:-;uc010sua.1:76443242:76467999:-;uc001syb.3:76443517:76467999:-
chr12:12674221-12674401:mpeak_17616|chr12_12630949_12715448_DUSP16_NM_-|	40,40	4,44	2,09	-2,12	3,39E-02	5,64E-01	2	1	61	6	2	4	40	34	0	121	146	67	57	4	2,44	-2,17	4,62	DUSP16	-	-	-
chr1:44451821-44451980:mpeak_2328|chr1_44444873_44455969_B4GALT2_NM_+|	121,92	4,35	2,01	-2,16	3,10E-02	5,58E-01	7	14	0	0	1	0	352	343	227	154	171	195	3	0	5,19	0,83	4,36	B4GALT2	chr1:44451878:+	chr1_43986206_+	uc001clg.3:44446832:44456120:+;uc001clh.3:44446986:44456120:+;uc010okl.2:44445683:44456120:+;uc001cli.3:44446832:44456120:+
chr6:18258171-18258294:mpeak_69585|chr6_18225961_18264799_DEK_NM_-|	72,24	4,34	2,12	-2,05	4,03E-02	6,20E-01	5	8	144	1	2	0	161	333	6	40	94	74	31	1	5,67	1,27	4,40	DEK	-	-	uc003ncr.1:18225949:18264218:-;uc011djf.1:18225949:18264218:-
chr18:12341263-12341320:mpeak_38693|chr18_12329782_12377275_AFG3L2_NM_-|	219,09	4,34	2,18	-1,98	4,72E-02	6,61E-01	11	11	0	0	0	1	222	876	22	427	483	576	3	0	3,97	-0,41	4,38	AFG3L2	chr18:12341260:-	-	uc002kqz.2:12329563:12377081:-
chr14:21975978-21976048:mpeak_24004|chr14_21966513_21979517_METTL3_NM_-|	25,73	4,31	2,14	-2,01	4,40E-02	6,40E-01	7	8	0	1	2	0	13	48	0	101	37	90	25	2	2,29	-1,89	4,18	METTL3	chr14:21975979:-	chr14_21507837_-	uc001wbc.3:21966401:21979365:-;uc010tlx.2:21969850:21979365:-;uc021rox.1:21969912:21979365:-
chr11:59419012-59419070:mpeak_14164|chr11_59405884_59436511_PATL1_NM_-|	135,22	4,30	2,01	-2,13	3,29E-02	5,63E-01	16	4	591	9	3	2	93	229	365	87	107	116	89	5	5,43	1,14	4,29	PATL1	-	chr11_59651544_-	uc010rkw.2:59416930:59423141:-;uc001noe.4:59405862:59436368:-;uc009yms.1:59410352:59436368:-
chr6:168291537-168291597:mpeak_73616|chr6_168227670_168370461_MLLT4_NM_+|	222,75	4,30	2,13	-2,02	4,29E-02	6,37E-01	6	13	907	26	6	3	51	382	547	255	252	225	94	5	4,72	0,42	4,30	MLLT4	-	-	uc003qwb.1:168227812:168352942:+;uc003qwc.2:168227812:168363262:+;uc021zij.1:168227812:168370615:+;uc021zik.1:168265251:168370615:+;uc003qwf.3:168289897:168312205:+
chr11:33162957-33163102:mpeak_13618|chr11_33106835_33183037_CSTF3_NM_-|	84,97	4,29	1,69	-2,53	1,13E-02	3,55E-01	69	101	238	25	59	30	11	62	0	136	127	162	374	27	1,84	-2,54	4,38	CSTF3	chr11:33162977:-;chr11:33163048:-	chr11_33141432_-;chr11_33141488_-;chr11_33141542_-	uc001muh.3:33106632:33182871:-
chr4:95921604-95921682:mpeak_62746|chr4_95679127_96075698_BMPR1B_NM_+|	47,56	4,28	1,99	-2,15	3,12E-02	5,58E-01	69	2	6	10	9	13	44	6	0	120	166	125	103	8	1,26	-3,05	4,31	BMPR1B	-	-	-
chr1:43417280-43417420:mpeak_2261|chr1_43392912_43424847_SLC2A1_NM_-|	152,04	4,23	1,74	-2,43	1,51E-02	4,06E-01	4	12	6	1	1	0	160	355	199	280	240	566	3	0	3,49	-0,61	4,10	SLC2A1	chr1:43417282:-;chr1:43417328:-;chr1:43417356:-	chr1_42951612_-;chr1_42951650_-;chr1_42951698_-	uc001cik.2:43392711:43424322:-
chr1:204513694-204513824:mpeak_7337|chr1_204485506_204518240_MDM4_NM_+|	117,22	4,22	1,89	-2,24	2,54E-02	5,04E-01	23	8	558	17	37	25	121	64	22	174	189	167	285	15	2,90	-1,36	4,25	MDM4	-	chr1_204544678_+	uc010pqx.2:204506595:204518810:+;uc001hbb.3:204506595:204518810:+;uc001hba.3:204494646:204518810:+;uc001hay.2:204494646:204518810:+;uc021phx.1:204494646:204518810:+
chrX:76855197-76855266:mpeak_86626|chrX_76764107_77041755_ATRX_NM_-|	142,18	4,22	2,10	-2,01	4,47E-02	6,42E-01	10	25	890	6	18	3	16	68	398	69	109	93	192	10	5,05	0,83	4,22	ATRX	chrX:76855201:-	-	uc004ecp.4:76763828:77041487:-;uc004ecq.4:76763828:77041487:-;uc004eco.4:76763828:76940447:-
chr14:21731580-21731638:mpeak_23942|chr14_21679465_21737638_HNRNPC_NM_-mpeak_23942|chr14_21679465_21737638_HNRNPC_NM_-||	1222,53	4,22	2,14	-1,98	4,81E-02	6,64E-01	8	4	359	5	5	13	3861	2481	50	2469	2482	2933	6	0	3,95	-0,30	4,25	HNRNPC	-	-	-
chr14:35005372-35005489:mpeak_24418|chr14_34985792_35008943_EAPP_NM_-|	51,15	4,21	2,08	-2,03	4,27E-02	6,37E-01	8	3	210	9	5	10	44	75	0	80	88	81	124	10	3,22	-1,06	4,28	EAPP	-	chr14_34536166_-	uc001wsd.1:34985515:35008834:-
chr3:14695919-14695984:mpeak_55738|chr3_14693252_14712402_CCDC174_NM_+|	14,42	4,19	2,12	-1,98	4,83E-02	6,65E-01	2	4	94	6	7	11	1	6	0	9	17	16	970	60	2,00	-2,60	4,60	CCDC174	-	-	uc010hei.1:14693343:14708495:+;uc003byw.3:14693343:14712701:+
chr6:110530270-110530517:mpeak_72256|chr6_110501623_110551156_CDC40_NM_+|	27,66	4,18	1,98	-2,11	3,47E-02	5,72E-01	2	10	122	7	5	7	16	30	0	52	45	36	191	14	2,82	-1,52	4,34	CDC40	chr6:110530519:+	chr6_110209098_+;chr6_110209117_+;chr6_110209197_+;chr6_110209314_+	uc003pua.3:110501647:110551334:+
chr17:35979804-35979889:mpeak_35510|chr17_35974398_36003493_DDX52_NM_-|	95,98	4,16	2,10	-1,98	4,77E-02	6,61E-01	8	112	790	8	15	7	13	119	0	22	33	23	460	37	4,95	0,74	4,21	DDX52	-	chr17_37619771_-	uc002hoi.2:35974340:36003449:-;uc002hoh.2:35974340:35993410:-
chr7:42261211-42261280:mpeak_74884|chr7_42006239_42276618_GLI3_NM_-|	16,03	4,10	1,86	-2,21	2,71E-02	5,24E-01	21	20	0	2	3	5	6	19	0	43	36	36	163	9	1,99	-2,20	4,18	GLI3	chr7:42261215:-	chr7_42221618_-	uc011kbh.2:42003927:42262852:-
chr1:150902606-150902656:mpeak_5276|chr1_150898814_150936722_SETDB1_NM_+|	42,76	4,08	2,02	-2,02	4,36E-02	6,38E-01	8	3	6	0	1	7	17	36	0	155	140	142	21	2	1,20	-3,05	4,25	SETDB1	-	-	uc001evw.4:150900190:150917638:+;uc009wmf.2:150900190:150923564:+;uc009wmg.2:150900190:150936322:+;uc001evv.2:150900190:150936840:+;uc001evu.2:150900190:150936840:+
chr14:23754303-23754361:mpeak_24101|chr14_23746396_23755309_HOMEZ_NM_-|	19,43	4,05	1,93	-2,09	3,63E-02	5,90E-01	34	10	0	6	7	1	14	12	0	37	43	69	167	10	1,56	-2,52	4,08	HOMEZ	chr14:23754309:-	chr14_23285102_-	uc001wja.2:23744783:23755161:-;uc001wjb.2:23744783:23762785:-
chr10:13629055-13629160:mpeak_9244|chr10_13628938_13672259_PRPF18_NM_+|	184,85	3,95	1,93	-2,04	4,11E-02	6,26E-01	110	36	1741	72	110	67	9	16	0	16	28	13	5012	438	2,92	-1,18	4,10	PRPF18	-	-	uc001imp.3:13629086:13672340:+
chr15:52646064-52646127:mpeak_28217|chr15_52606045_52821247_MYO5A_NM_-|	38,11	3,92	1,99	-1,97	4,89E-02	6,69E-01	19	4	133	1	0	3	74	24	111	23	26	39	75	7	5,23	1,23	4,01	MYO5A	chr15:52646067:-	chr15_52353870_-	uc002aby.2:52605892:52821003:-;uc002abx.3:52605892:52821003:-
chrX:53432170-53432284:mpeak_86095|chrX_53407107_53449677_SMC1A_NM_-|	474,92	3,91	1,97	-1,99	4,65E-02	6,60E-01	115	171	3228	116	134	83	279	475	6	413	425	255	463	31	3,40	-0,52	3,92	SMC1A	-	chrX_53405232_-;chrX_53405282_-	uc004dsg.3:53407023:53449549:-;uc011moe.2:53407023:53448887:-;uc011mof.2:53431886:53449549:-
chr17:77753487-77753541:mpeak_38054|chr17_77751976_77757530_CBX2_NM_+|	110,66	3,88	1,91	-2,03	4,28E-02	6,37E-01	8	2	0	0	7	4	48	30	6	376	327	520	18	1	-0,12	-3,87	3,75	CBX2	chr17:77753538:+	chr17_79779739_+	uc002jxb.2:77752034:77755948:+;uc002jxc.3:77752034:77758841:+
chr1:171519266-171519388:mpeak_6358|chr1_171454665_171560725_PRRC2C_NM_+|	139,83	3,87	1,85	-2,09	3,70E-02	5,99E-01	8	31	227	13	10	4	17	324	210	273	398	163	48	3	3,29	-0,60	3,89	PRRC2C	-	-	uc010pmg.2:171481227:171560986:+;uc010pmh.2:171509680:171560986:+
chr1:36758195-36758287:mpeak_1926|chr1_36690016_36769396_THRAP3_NM_+|	317,64	3,76	1,78	-2,11	3,46E-02	5,72E-01	62	16	702	35	7	18	426	291	735	490	434	595	54	4	3,70	-0,07	3,76	THRAP3	-	-	uc001cae.4:36748164:36769618:+;uc001caf.4:36748164:36769618:+
chr12:50480071-50480136:mpeak_18660|chr12_50478982_50492729_SMARCD1_NM_+|	133,86	3,73	1,82	-2,05	4,06E-02	6,22E-01	26	35	945	53	29	33	55	109	28	98	97	100	525	39	3,14	-0,62	3,76	SMARCD1	-	chr12_50086346_+	uc010smo.1:50479152:50482441:+;uc001rvx.4:50479152:50492783:+;uc001rvy.4:50479152:50492783:+;uc009zlp.3:50479152:50492783:+
chr18:45379621-45379816:mpeak_39364|chr18_45368321_45457517_SMAD2_NM_-|	57,33	3,60	1,76	-2,05	4,07E-02	6,22E-01	124	30	0	5	3	2	91	66	133	74	95	66	79	5	3,84	0,30	3,54	SMAD2	-	chr18_47853303_-;chr18_47853349_-;chr18_47853392_-	uc002lcy.4:45368197:45423127:-;uc002lcz.4:45368197:45423127:-;uc010xdc.3:45368197:45423127:-;uc010xdd.2:45371604:45423127:-
chr8:42780727-42780783:mpeak_79010|chr8_42752032_42873500_HOOK3_NM_+|	88,33	-3,47	1,75	1,98	4,78E-02	6,61E-01	11	14	0	23	9	7	44	164	674	45	31	36	4	36	-0,68	2,97	-3,65	HOOK3	-	-	uc010lxq.1:42752274:42852894:+;uc003xpr.3:42752274:42873641:+
chr13:25889544-25889610:mpeak_22239|chr13_25875665_25914102_NUPL1_NM_+|	106,70	-3,70	1,75	2,12	3,39E-02	5,64E-01	10	3	0	34	19	13	115	79	702	122	106	76	2	22	-2,36	1,56	-3,92	NUPL1	-	-	uc001uqg.1:25875911:25905719:+;uc001uqi.3:25875911:25914272:+;uc001uqj.3:25875911:25914272:+
chr6:34950908-34951003:mpeak_70579|chr6_34857037_35056382_ANKS1A_NM_+|	90,26	-3,77	1,90	1,99	4,70E-02	6,61E-01	2	8	0	17	6	32	29	90	647	84	66	103	2	22	-2,46	1,60	-4,06	ANKS1A	-	-	uc003ojx.4:34857179:35056386:+
chr1:70703183-70703244:mpeak_3084|chr1_70671364_70716290_SRSF11_NM_+|	349,21	-3,77	1,90	1,99	4,66E-02	6,60E-01	48	54	0	37	86	39	225	148	3156	139	153	105	4	41	-0,68	3,15	-3,82	SRSF11	-	chr1_70237503_+;chr1_70237550_+	uc001deu.2:70687319:70716186:+;uc001det.3:70687319:70716488:+;uc001des.3:70687319:70716488:+;uc001dev.3:70701213:70716488:+
chr6:76344473-76344536:mpeak_71538|chr6_76311224_76425100_SENP6_NM_+|	35,06	-3,84	1,93	1,99	4,64E-02	6,59E-01	2	1	0	5	2	2	14	55	282	18	23	16	1	18	-1,69	2,63	-4,32	SENP6	-	chr6_75634807_+	uc003pic.2:76312240:76388647:+;uc003pif.1:76343416:76388647:+;uc003pid.4:76312240:76425310:+;uc003pie.4:76312240:76425310:+
chr13:113200785-113200850:mpeak_23718|chr13_113140465_113242499_TUBGCP3_NM_-|	123,86	-3,90	1,88	2,07	3,84E-02	6,08E-01	2	5	0	16	24	18	35	81	884	105	189	127	1	14	-2,98	1,25	-4,23	TUBGCP3	chr13:113200796:-	chr13_112546486_-	uc001vse.1:113140306:113242294:-;uc010tjq.1:113140306:113242294:-;uc001vsf.3:113153223:113242294:-
chr6:79786414-79786476:mpeak_71584|chr6_79651047_79788011_PHIP_NM_-|	144,47	-3,92	1,84	2,13	3,29E-02	5,63E-01	19	10	0	17	9	24	38	315	1144	39	90	29	3	32	-0,80	3,25	-4,05	PHIP	chr6:79786420:-	chr6_79076706_-	uc003pir.3:79650409:79787785:-;uc011dyp.2:79650409:79787785:-
chr6:33260597-33260757:mpeak_70441|chr6_33260090_33267165_RGL2_NM_-|	224,68	-3,93	1,85	2,13	3,34E-02	5,63E-01	5	14	0	19	15	19	78	182	2007	95	105	158	1	15	-1,47	2,66	-4,13	RGL2	chr6:33260618:-;chr6:33260683:-;chr6:33260710:-	chr6_33292826_-;chr6_33292936_-	uc003odu.3:33259878:33262497:-;uc010jur.3:33259878:33262497:-;uc003odv.3:33259878:33266387:-;uc003odw.3:33259878:33264547:-
chr1:71546618-71546680:mpeak_3134|chr1_71530820_71546972_ZRANB2_NM_-|	220,52	-4,03	1,88	2,14	3,22E-02	5,60E-01	11	17	6	13	6	5	46	113	2327	39	34	29	1	23	0,49	4,60	-4,11	ZRANB2	-	chr1_71080945_-	uc001dfs.3:71531401:71546678:-;uc001dft.3:71530756:71546678:-
chr6:160172144-160172301:mpeak_73489|chr6_160148029_160176059_WTAP_NM_+|	169,56	-4,09	2,03	2,01	4,39E-02	6,40E-01	3	1	0	4	4	5	29	155	1542	77	93	122	0	4,51	-1,87	2,56	-4,44	WTAP	chr6:160172198:+;chr6:160172304:+	chr6_159751162_+;chr6_159751269_+	uc003qsl.4:160157297:160176643:+;uc031sqv.1:160157297:160176643:+
chr14:97030667-97030728:mpeak_26589|chr14_96968712_97031291_PAPOLA_NM_+|	282,25	-4,10	1,91	2,14	3,21E-02	5,60E-01	5	1	0	1	7	7	409	193	2393	167	117	86	0	4	-1,32	3,02	-4,33	PAPOLA	chr14:97030724:+	chr14_96564388_+	uc010avp.3:96998900:97031387:+;uc001yfq.3:96968929:97031387:+;uc001yfr.3:96968929:97031387:+;uc010twv.2:96968929:97031387:+
chr8:95522207-95522319:mpeak_80001|chr8_95501088_95565746_KIAA1429_NM_-|	94,10	-4,10	1,89	2,17	2,98E-02	5,53E-01	1	0	0	6	7	7	63	195	392	194	137	127	0	4	-4,27	0,51	-4,78	KIAA1429	chr8:95522217:-;chr8:95522265:-	chr8_94509989_-;chr8_94510041_-	uc003ygo.2:95500933:95565675:-
chr7:72889140-72889269:mpeak_75474|chr7_72856023_72936615_BAZ1B_NM_-|	133,24	-4,18	2,03	2,06	3,94E-02	6,17E-01	1	3	0	6	6	20	22	94	1078	153	127	88	1	9	-2,91	1,70	-4,61	BAZ1B	chr7:72889215:-	chr7_73474886_-	uc003tyc.3:72856525:72936263:-
chr3:50106128-50106211:mpeak_56841|chr3_49977476_50114440_RBM6_NM_+|	220,12	-4,19	2,07	2,03	4,29E-02	6,37E-01	8	23	0	21	14	10	16	92	2283	63	68	42	2	26	-0,52	3,79	-4,31	RBM6	chr3:50106206:+	chr3_50068754_+	uc003cyd.3:50085686:50114566:+;uc011bdi.2:50095839:50114566:+;uc003cye.3:50085686:50114566:+;uc003cyc.3:50000074:50114566:+
chr21:46566119-46566292:mpeak_53544|chr21_46494492_46645461_ADARB1_NR_+mpeak_53544|chr21_46494492_46641932_ADARB1_NM_+||	20,79	-4,19	1,93	2,16	3,04E-02	5,56E-01	0	8	0	9	15	21	18	84	55	4	18	16	15	116	-2,50	2,03	-4,52	ADARB1	chr21:46566210:+;chr21:46566291:+	chr21_45146295_+	-
chr12:27059226-27059301:mpeak_17963|chr12_27058469_27091254_ASUN_NM_-|	95,26	-4,21	2,13	1,98	4,76E-02	6,61E-01	1	4	6	1	8	7	9	42	973	36	38	20	1	17	-0,59	3,45	-4,05	ASUN	-	-	uc001rhj.4:27058429:27069057:-;uc001rhk.4:27058429:27089736:-;uc010sjk.2:27058429:27081835:-
chr10:267249-267305:mpeak_8839|chr10_180404_298287_ZMYND11_NM_+|	691,28	-4,25	1,75	2,42	1,55E-02	4,10E-01	4	10	6	22	22	15	714	231	6158	294	515	306	0	5,28	-1,62	2,67	-4,29	ZMYND11	-	-	uc010pzu.2:225952:298410:+;uc001ifk.3:225952:295049:+;uc010pzv.2:225952:298410:+;uc010pzw.2:225952:298410:+;uc001ifm.3:225952:298410:+;uc010pzx.2:225952:295049:+;uc001ifn.3:225952:295049:+;uc009xhg.3:243880:298410:+;uc010pzy.2:255850:298410:+;uc009xhh.3:255850:298410:+
chr3:32587334-32587473:mpeak_56110|chr3_32568400_32612366_DYNC1LI1_NM_-|	230,14	-4,39	2,05	2,14	3,22E-02	5,60E-01	31	37	0	32	33	53	23	78	2283	87	58	46	4	62	-0,81	3,64	-4,45	DYNC1LI1	-	-	uc003cfb.4:32568290:32612262:-;uc011axh.2:32568290:32612262:-
chr19:54658104-54658247:mpeak_43271|chr19_54641435_54659046_CNOT3_NM_+|	50,19	-4,40	2,14	2,05	3,99E-02	6,17E-01	14	8	0	2	13	26	9	10	481	13	13	13	7	106	-0,85	3,69	-4,54	CNOT3	chr19:54658242:+	chr19_54154435_+;chr19_54154449_+;chr19_54154497_+	uc002qdj.2:54646714:54659145:+;uc002qdk.2:54646714:54659145:+
chr12:54665642-54665769:mpeak_19051|chr12_54635689_54673915_CBX5_NM_-|	729,80	-4,42	2,14	2,06	3,93E-02	6,17E-01	0	0	0	4	5	1	1831	223	3438	944	1274	1038	#DIV/0!	0	-Inf	0,75	-Inf	CBX5	chr12:54665638:-;chr12:54665713:-	chr12_54271808_-	-
chr2:45880295-45880354:mpeak_44922|chr2_45879042_46411873_PRKCE_NM_+|	30,39	-4,44	2,25	1,97	4,85E-02	6,66E-01	0	8	0	1	9	7	7	21	287	8	10	6	8	71	-1,00	3,72	-4,72	PRKCE	chr2:45880350:+;chr2:45880402:+	chr2_45653210_+	uc002rut.3:45879239:46412020:+
chr9:88631510-88631679:mpeak_82938|chr9_88556056_88636815_NAA35_NM_+|	340,69	-4,47	2,20	2,03	4,21E-02	6,33E-01	78	158	0	69	106	86	19	65	3339	60	67	42	10	154	-0,15	4,34	-4,49	NAA35	-	chr9_86016612_+	uc004aoi.4:88557074:88636875:+;uc004aoj.4:88557074:88636875:+
chr15:59039452-59039709:mpeak_28374|chr15_58889840_59042177_ADAM10_NM_-|	116,35	-4,47	2,21	2,02	4,32E-02	6,37E-01	0	6	0	1	8	6	32	67	1172	31	44	31	2	14	-1,19	3,60	-4,79	ADAM10	chr15:59039444:-;chr15:59039553:-	chr15_58747355_-	uc002afd.1:58889745:59041733:-;uc010ugz.1:58889745:59041733:-
chr15:67972572-67972626:mpeak_28802|chr15_67835020_68098983_MAP2K5_NM_+|	64,18	-4,59	2,28	2,01	4,40E-02	6,40E-01	0	2	0	1	3	7	9	44	597	12	46	50	1	10	-2,77	2,60	-5,37	MAP2K5	chr15:67972628:+	chr15_67680288_+	uc002aqu.3:67835673:68099088:+;uc002aqv.3:67835673:68099088:+;uc010ujw.2:67841518:68099088:+;uc002aqx.3:67934820:68099088:+
chr14:102389693-102389769:mpeak_26699|chr14_102228134_102391477_PPP2R5C_NM_+|	62,68	-4,66	2,15	2,17	3,02E-02	5,56E-01	0	0	0	2	4	4	53	45	398	87	84	75	#DIV/0!	4	-Inf	1,01	-Inf	PPP2R5C	chr14:102389749:+	chr14_101923432_+	uc010txr.2:102228230:102391609:+;uc001ykk.3:102228230:102391609:+;uc001yko.3:102276279:102391609:+;uc001ykp.3:102276279:102391609:+
chr2:153246535-153246600:mpeak_47821|chr2_153191750_153504309_FMNL2_NM_+|	184,58	-4,67	2,27	2,06	3,98E-02	6,17E-01	6	15	0	3	2	0	6	73	2089	6	9	4	1	28	1,98	6,82	-4,84	FMNL2	-	-	uc002tye.3:153192117:153504419:+
chr19:44128984-44129043:mpeak_42393|chr19_44127591_44143991_CADM4_NM_-|	29,48	-4,69	2,26	2,07	3,85E-02	6,08E-01	4	1	0	1	5	13	10	3	282	17	7	10	3	55	-1,88	3,08	-4,97	CADM4	chr19:44128990:-	chr19_43624888_-	uc002oxc.1:44127481:44143942:-
chr9:96438028-96438082:mpeak_83167|chr9_96338908_96439869_PHF2_NM_+|	374,09	-4,72	2,11	2,24	2,52E-02	5,01E-01	6	3	0	22	28	17	114	15	3449	264	213	357	0	8	-2,83	2,10	-4,94	PHF2	-	-	uc004aub.3:96339055:96439958:+;uc011lug.1:96407962:96439037:+;uc004auc.3:96425233:96441662:+
chr2:128480521-128480620:mpeak_47266|chr2_128464126_128568761_WDR33_NM_-|	32,17	-4,73	2,37	2,00	4,59E-02	6,56E-01	0	0	0	17	9	8	2	124	6	93	57	69	#DIV/0!	16	-Inf	-0,74	-Inf	WDR33	-	-	uc002tpg.2:128463896:128528555:-
chr6:43324628-43324684:mpeak_70956|chr6_43308240_43337181_ZNF318_NM_-|	73,26	-4,88	2,18	2,24	2,48E-02	5,01E-01	0	0	0	4	2	7	22	220	326	92	148	59	#DIV/0!	4	-Inf	0,93	-Inf	ZNF318	chr6:43324628:-	chr6_43356891_-	uc003oux.3:43304895:43337103:-
chr3:49035490-49035549:mpeak_56739|chr3_49027340_49044119_P4HTM_NM_+|	34,02	-4,94	2,32	2,13	3,33E-02	5,63E-01	0	0	0	5	11	18	125	28	0	80	86	55	#DIV/0!	16	-Inf	-0,53	-Inf	P4HTM	chr3:49035548:+	chr3_48998115_+	uc003cvh.3:49027689:49044340:+;uc003cvg.3:49027689:49044340:+
chr2:71622746-71622890:mpeak_45708|chr2_71558884_71661871_ZNF638_NM_+|	154,21	-4,96	2,43	2,04	4,17E-02	6,30E-01	0	13	0	11	9	4	2	41	1686	23	37	25	2	27	-0,80	4,35	-5,15	ZNF638	chr2:71622818:+;chr2:71622884:+	chr2_71395687_+;chr2_71395750_+	uc002sib.1:71576084:71653644:+;uc002shx.3:71576084:71661937:+;uc002shz.3:71576084:71661937:+;uc002shy.3:71576084:71661937:+;uc002sia.3:71576084:71661937:+;uc010yqw.1:71503768:71651168:+
chr15:93492409-93492468:mpeak_29756|chr15_93443550_93567601_CHD2_NM_+|	99,86	-4,98	2,25	2,21	2,71E-02	5,24E-01	3	2	0	4	9	8	1	38	1017	32	37	46	1	19	-2,09	3,19	-5,28	CHD2	chr15:93492464:+	chr15_92949229_+	uc002bso.1:93444467:93563555:+;uc002bsp.3:93444467:93567935:+
chr5:59755809-59755879:mpeak_65467|chr5_58270907_59783925_PDE4D_NM_-|	40,46	-4,98	2,42	2,06	3,95E-02	6,17E-01	31	27	0	4	7	13	0	11	387	3	1	1	14	469	1,23	6,25	-5,02	PDE4D	-	-	-
chr18:18629804-18629853:mpeak_38831|chr18_18531348_18691812_ROCK1_NM_-|	126,64	-5,00	2,23	2,24	2,49E-02	5,01E-01	1	2	6	4	6	1	8	43	1371	9	56	12	1	16	-0,49	4,21	-4,70	ROCK1	-	-	uc002kte.3:18531344:18690871:-
chr21:45519895-45519953:mpeak_53457|chr21_45432205_45523173_TRAPPC10_NM_+|	106,14	-5,09	2,26	2,26	2,41E-02	5,00E-01	0	0	0	2	7	1	40	112	768	121	96	126	#DIV/0!	3	-Inf	1,42	-Inf	TRAPPC10	chr21:45519953:+	chr21_5161975_-	uc010gpo.3:45483495:45523412:+;uc011afa.2:45502688:45523412:+;uc002zea.3:45432374:45523412:+
chr1:144929679-144929737:mpeak_4807|chr1_144852499_145076186_PDE4DIP_NM_-|	3,14	-5,09	2,51	2,02	4,29E-02	NA	0	0	0	1	5	3	3	12	6	3	3	1	#DIV/0!	124	-Inf	1,46	-Inf	PDE4DIP	chr1:144929680:-	-	uc001emb.1:144892213:144931708:-;uc001elw.4:144852457:144994731:-;uc021ouh.1:144852353:144994731:-;uc001emd.2:144892437:144994731:-;uc001emc.2:144892213:144994731:-;uc001elx.4:144852457:145039609:-;uc001elk.2:144676869:144994731:-;uc001ell.2:144676869:144994994:-;uc001elm.4:144676869:144994635:-;uc001eln.4:144676869:145039609:-;uc001elo.3:144676869:145075862:-
chr16:58047914-58047964:mpeak_32157|chr16_58035276_58054044_USB1_NM_+|	47,87	-5,18	2,07	2,51	1,22E-02	3,65E-01	0	0	0	1	2	6	100	93	232	44	48	48	#DIV/0!	7	-Inf	1,61	-Inf	USB1	chr16:58047959:+	chr16_58014054_+	uc002emz.3:58035387:58054149:+;uc010vib.2:58035387:58054149:+
chr16:4890973-4891061:mpeak_30538|chr16_4855311_4897303_GLYR1_NM_-|	225,03	-5,24	2,21	2,37	1,78E-02	4,33E-01	0	0	0	1	6	1	331	152	1603	226	168	212	#DIV/0!	1	-Inf	1,78	-Inf	GLYR1	chr16:4891010:-	chr16_4841010_-	uc002cxx.4:4855236:4897266:-;uc002cya.2:4855236:4897266:-;uc010uxv.1:4855236:4897266:-
chr1:192986853-192986909:mpeak_6941|chr1_192985525_193028523_UCHL5_NM_-|	73,42	-5,24	2,06	2,54	1,10E-02	3,52E-01	0	0	0	4	1	7	120	163	321	91	121	53	#DIV/0!	4,96	-Inf	1,19	-Inf	UCHL5	chr1:192986854:-	chr1_193017725_-	uc001gsm.3:192985480:193028390:-;uc001gso.3:192985480:193028390:-
chr5:112220975-112221069:mpeak_66733|chr5_112196884_112227299_SRP19_NM_+|	20,95	-5,26	1,88	2,81	5,01E-03	2,43E-01	4	1	0	27	16	36	18	13	94	10	24	9	6	181	-4,09	1,53	-5,61	SRP19	-	chr5_112885352_+	uc011cvu.2:112197073:112227304:+
chr2:32622092-32622149:mpeak_44543|chr2_32582095_32842791_BIRC6_NM_+|	169,87	-5,26	2,06	2,55	1,09E-02	3,52E-01	13	1	0	12	15	31	21	138	1636	61	75	35	1	34	-2,01	3,39	-5,41	BIRC6	chr2:32622146:+	chr2_32397078_+	uc010ezu.3:32582229:32842971:+
chr2:29092290-29092344:mpeak_44438|chr2_29073108_29093175_TRMT61B_NM_-|	24,19	-5,28	2,47	2,14	3,26E-02	5,62E-01	0	1	0	7	5	0	2	35	193	15	13	20	1	37	-4,47	2,28	-6,75	TRMT61B	chr2:29092291:-	chr2_28869426_-	uc002rmm.3:29073064:29093143:-
chr15:40266066-40266134:mpeak_27455|chr15_40226324_40327227_EIF2AK4_NM_+|	13,62	-5,44	2,42	2,25	2,42E-02	5,00E-01	0	0	0	1	6	7	27	81	0	9	18	16	#DIV/0!	31	-Inf	1,34	-Inf	EIF2AK4	chr15:40266133:+	chr15_39973926_+	uc010bbj.1:40254054:40327285:+;uc001zkm.1:40226396:40327285:+
chr15:93445473-93445532:mpeak_29752|chr15_93443550_93567601_CHD2_NM_+|	98,50	-5,44	2,67	2,04	4,16E-02	6,30E-01	0	1	0	2	8	0	1	38	1017	32	37	46	0	13	-3,21	3,19	-6,41	CHD2	chr15:93445524:+	chr15_92902294_+	uc002bsm.2:93444467:93486365:+;uc002bsn.3:93444467:93492310:+;uc002bso.1:93444467:93563555:+;uc002bsp.3:93444467:93567935:+
chr9:94053732-94053782:mpeak_83055|chr9_93976707_94124251_AUH_NM_-|	15,06	-5,51	2,57	2,14	3,23E-02	5,60E-01	0	0	0	4	0	6	13	3	122	14	7	12	#DIV/0!	41	-Inf	2,02	-Inf	AUH	chr9:94053725:-	chr9_91291450_-;chr9_91291477_-	uc004arf.4:93976629:94124171:-;uc004arg.4:93976629:94124171:-
chr2:46072844-46072917:mpeak_44924|chr2_45879042_46411873_PRKCE_NM_+|	32,71	-5,54	1,96	2,83	4,69E-03	2,36E-01	7	3	0	10	18	15	7	21	287	8	10	6	5	180	-2,06	3,72	-5,78	PRKCE	chr2:46072897:+	chr2_45845757_+	uc002rut.3:45879239:46412020:+
chr6:157505720-157505790:mpeak_73358|chr6_157099063_157527300_ARID1B_NM_+|	187,81	-5,56	2,25	2,47	1,36E-02	3,93E-01	0	1	0	3	2	5	29	134	1813	83	93	94	0	3	-4,10	2,88	-6,97	ARID1B	chr6:157505771:+	chr6_157184636_+	uc003qqo.3:157099063:157529025:+;uc003qqp.3:157099063:157529025:+;uc003qqn.3:157099063:157529025:+
chr9:96431215-96431347:mpeak_83166|chr9_96338908_96439869_PHF2_NM_+|	368,55	-5,62	2,49	2,26	2,38E-02	4,98E-01	0	0	0	4	2	3	114	15	3449	264	213	357	#DIV/0!	1	-Inf	2,10	-Inf	PHF2	chr9:96431354:+	chr9_93669071_+	uc004aub.3:96339055:96439958:+;uc011lug.1:96407962:96439037:+;uc004auc.3:96425233:96441662:+
chr11:72578902-72579033:mpeak_15308|chr11_72549919_72853143_FCHSD2_NM_-|	35,90	-5,64	2,41	2,34	1,93E-02	4,53E-01	2	0	0	7	5	6	1	9	354	13	7	26	2	40	-3,17	2,97	-6,14	FCHSD2	-	-	uc001oti.2:72554184:72788704:-;uc009ytl.3:72549835:72852922:-;uc010rrg.2:72549835:72700049:-;uc001oth.4:72549835:72726927:-
chr6:17623680-17623750:mpeak_69540|chr6_17616412_17707065_NUP153_NM_-|	247,64	-5,70	2,33	2,45	1,45E-02	3,99E-01	1	0	0	3	6	7	8	163	2333	168	142	141	0	4	-3,96	2,47	-6,43	NUP153	chr6:17623684:-	chr6_17623454_-	uc011dje.2:17616327:17706618:-;uc003ncd.2:17616327:17706618:-;uc010jpl.2:17616327:17706618:-
chrX:48760883-48761043:mpeak_85955|chrX_48760742_48769235_SLC35A2_NM_-|	139,50	-5,90	2,18	2,70	6,93E-03	2,79E-01	197	155	503	233	197	370	3	16	0	0	0	0	3006	#DIV/0!	0,10	Inf	-Inf	SLC35A2	chrX:48760890:-;chrX:48760923:-;chrX:48760992:-	chrX_48903614_-	uc004dlo.1:48760714:48768913:-
chr5:14796983-14797033:mpeak_64741|chr5_14711419_14871887_ANKH_NM_-|	17,62	-5,94	2,10	2,83	4,70E-03	2,36E-01	0	1	0	7	2	3	10	49	116	4	10	9	1	52	-4,53	2,89	-7,43	ANKH	-	-	uc003jfm.4:14711305:14871556:-
chr7:107818589-107818645:mpeak_76714|chr7_107790592_108096841_NRCAM_NM_-mpeak_76714|chr7_107790592_108096841_NRCAM_NM_-||	76,03	-5,97	2,49	2,40	1,65E-02	4,22E-01	0	0	0	1	5	6	36	4	696	49	71	45	#DIV/0!	7	-Inf	2,16	-Inf	NRCAM	chr7:107818590:-	chr7_108178148_-	uc022aka.1:107790354:107880508:-;uc011kmk.2:107790354:107880508:-;uc003vfd.3:107790354:107880508:-;uc003vfe.3:107790354:107880508:-;uc003vfc.3:107790354:107880508:-
chr18:265450-265506:mpeak_38401|chr18_214921_268059_THOC1_NM_-|	57,13	-5,98	2,60	2,31	2,11E-02	4,68E-01	0	8	0	5	0	13	2	23	614	8	5	7	4	140	-1,25	4,98	-6,23	THOC1	-	-	uc002kkj.4:214625:268019:-;uc002kkl.2:225288:268019:-
chr18:9136917-9136974:mpeak_38579|chr18_9136750_9280938_ANKRD12_NM_+|	15,03	-5,99	2,82	2,12	3,38E-02	5,64E-01	3	2	0	5	0	8	0	2	155	0	2	3	3	267	-1,36	4,98	-6,34	ANKRD12	-	-	-
chr11:19258974-19259024:mpeak_13405|chr11_19246387_19263202_E2F8_NM_-|	21,29	-6,12	2,85	2,15	3,15E-02	5,60E-01	0	0	0	4	2	5	0	1	205	20	9	11	#DIV/0!	27	-Inf	2,37	-Inf	E2F8	-	-	uc001mpm.3:19246204:19261668:-;uc001mpo.2:19246204:19261668:-;uc001mpn.5:19246204:19261668:-
chr19:36214131-36214182:mpeak_41838|chr19_36208920_36229182_KMT2B_NM_+|	79,65	-6,31	2,46	2,57	1,02E-02	3,40E-01	0	0	0	5	2	2	6	33	779	52	26	49	#DIV/0!	8	-Inf	2,68	-Inf	KMT2B	-	-	uc021usu.2:36208920:36214644:+;uc021usv.1:36208920:36229458:+
chr1:84552602-84552663:mpeak_3291|chr1_84543657_84700862_PRKACB_NM_+|	162,43	-6,34	2,18	2,91	3,58E-03	2,17E-01	4	5	0	4	3	7	69	5	1819	10	14	9	1	45	-0,71	5,86	-6,57	PRKACB	-	chr1_84086974_+	uc001dji.3:84544008:84670173:+;uc001djj.3:84544008:84700988:+
chr2:153246254-153246389:mpeak_47820|chr2_153191750_153504309_FMNL2_NM_+|	185,60	-6,49	2,11	3,08	2,09E-03	1,64E-01	8	8	6	4	3	10	6	73	2089	6	9	4	1	92	0,30	6,82	-6,52	FMNL2	chr2:153246281:+	-	uc002tye.3:153192117:153504419:+
chr1:82267596-82267660:mpeak_3272|chr1_82165454_82456074_ADGRL2_NM_+|	155,62	-6,49	2,52	2,57	1,00E-02	3,38E-01	0	10	0	1	8	0	5	74	1752	4	3	9	2	58	0,10	6,81	-6,71	ADGRL2	-	chr1_81801964_+	-
chr2:202624178-202624233:mpeak_49013|chr2_202566612_202645895_ALS2_NM_-|	115,22	-6,57	2,37	2,77	5,59E-03	2,50E-01	0	1	0	4	1	10	14	70	1155	39	55	35	0	11	-4,72	3,27	-7,99	ALS2	chr2:202624175:-	-	uc002uyo.3:202566573:202633608:-;uc002uyp.4:202587753:202633608:-;uc002uyq.3:202606308:202633608:-
chr3:125027637-125027696:mpeak_58476|chr3_124952783_125094198_ZNF148_NM_-|	341,70	-6,63	2,61	2,54	1,12E-02	3,55E-01	0	0	0	0	1	9	68	190	3366	120	225	120	#DIV/0!	3	-Inf	2,96	-Inf	ZNF148	chr3:125027642:-	chr3_125308802_-	uc003ehx.4:124951184:125032484:-;uc003ehz.4:124951184:125032484:-;uc010hsa.3:124951184:125032484:-;uc003eia.4:124951184:125032484:-
chr4:153451419-153451582:mpeak_63799|chr4_153244301_153456393_FBXW7_NM_-|	105,25	-6,65	2,26	2,94	3,32E-03	2,07E-01	0	1	0	8	9	15	15	46	940	41	126	61	0	14	-5,94	2,13	-8,07	FBXW7	chr4:153451417:-;chr4:153451446:-;chr4:153451520:-	chr4_152530274_-;chr4_152530366_-	-
chr16:24571032-24571130:mpeak_31257|chr16_24550907_24582196_RBBP6_NM_+|	202,74	-6,66	2,40	2,77	5,59E-03	2,50E-01	3	9	0	12	13	20	0	69	2233	22	32	20	1	60	-1,88	4,97	-6,85	RBBP6	chr16:24571111:+	chr16_24559754_+;chr16_24559806_+	uc010vcb.1:24566986:24581818:+;uc002dmh.3:24551947:24583766:+;uc002dmi.3:24551947:24583766:+;uc010bxr.3:24551947:24583766:+;uc002dmk.3:24566986:24583766:+
chr19:12207297-12207347:mpeak_40793|chr19_12203077_12222060_ZNF788_NR_+|	15,30	-6,67	2,64	2,52	1,16E-02	3,59E-01	46	11	6	43	16	43	0	20	0	0	0	0	105	#DIV/0!	-0,72	Inf	-Inf	ZNF788	-	-	uc002mtc.1:12203282:12208888:+
chr13:113198861-113198921:mpeak_23717|chr13_113140465_113242499_TUBGCP3_NM_-|	121,39	-6,73	2,22	3,03	2,41E-03	1,71E-01	0	0	0	11	11	14	35	81	884	105	189	127	#DIV/0!	8	-Inf	1,25	-Inf	TUBGCP3	chr13:113198863:-	chr13_112544557_-	uc001vse.1:113140306:113242294:-;uc010tjq.1:113140306:113242294:-;uc001vsf.3:113153223:113242294:-
chr1:247470260-247470451:mpeak_8798|chr1_247464578_247495045_ZNF496_NM_-|	3,86	-6,77	3,18	2,13	3,34E-02	NA	1	0	0	3	7	11	0	22	0	3	0	0	5	251	-4,31	3,05	-7,36	ZNF496	chr1:247470256:-;chr1:247470344:-;chr1:247470388:-	chr1_247306955_-;chr1_247307039_-;chr1_247307058_-;chr1_247307088_-	uc001icq.1:247467327:247473734:-;uc009xgv.3:247463820:247492880:-;uc001ico.3:247463820:247492880:-
chr17:9086936-9086990:mpeak_34351|chr17_8924858_9142956_NTN1_NM_+|	79,11	-6,81	2,48	2,75	5,96E-03	2,57E-01	0	0	0	0	2	17	54	69	647	50	46	64	#DIV/0!	17	-Inf	2,26	-Inf	NTN1	chr17:9086988:+	chr17_9183669_+	uc002glw.4:8925690:9143285:+
chr6:15509530-15509585:mpeak_69483|chr6_15246205_15520299_JARID2_NM_+|	465,55	-6,92	2,41	2,88	4,04E-03	2,30E-01	0	0	0	4	2	6	42	269	4632	197	229	206	#DIV/0!	2	-Inf	2,97	-Inf	JARID2	chr6:15509592:+	chr6_15509369_+	uc011div.3:15468795:15520482:+;uc003nbj.4:15246770:15520482:+
chr20:40126738-40126796:mpeak_51546|chr20_40034129_40247133_CHD6_NM_-|	193,21	-6,92	2,46	2,81	4,96E-03	2,42E-01	0	1	0	6	4	7	2	50	2101	61	61	25	0	12	-4,03	3,87	-7,90	CHD6	chr20:40126742:-	chr20_41498103_-	uc002xka.1:40033232:40179976:-;uc002xkd.2:40083265:40162176:-
chr16:89493017-89493090:mpeak_33434|chr16_89353521_89556969_ANKRD11_NR_-mpeak_33434|chr16_89335071_89556969_ANKRD11_NM_-||	137,41	-6,95	2,44	2,85	4,38E-03	2,34E-01	0	1	0	4	6	7	2	55	1432	38	55	50	0	12	-4,99	3,38	-8,37	ANKRD11	chr16:89493014:-;chr16:89493039:-	chr16_89426609_-	-
chr1:44137163-44137222:mpeak_2304|chr1_44115796_44169900_KDM4A_NM_+|	325,45	-6,96	2,43	2,87	4,14E-03	2,30E-01	0	0	0	5	5	7	14	211	3079	183	120	280	#DIV/0!	3	-Inf	2,50	-Inf	KDM4A	-	chr1_43671542_+	uc001cjx.3:44118846:44170041:+;uc010oki.2:44118846:44169907:+
chr6:73696969-73697103:mpeak_71451|chr6_73331570_73904174_KCNQ5_NM_+|	7,41	-6,97	2,62	2,66	7,76E-03	2,88E-01	15	7	0	16	11	12	0	16	11	0	0	0	83	#DIV/0!	-0,77	Inf	-Inf	KCNQ5	chr6:73697024:+;chr6:73697080:+	-	uc003pgj.4:73331917:73834272:+;uc011dyh.2:73331917:73905137:+;uc011dyi.2:73331917:73905137:+;uc010kat.3:73331917:73905137:+;uc003pgk.3:73331917:73905137:+;uc011dyj.2:73331917:73905137:+
chr1:82190212-82190271:mpeak_3271|chr1_82165454_82456074_ADGRL2_NM_+|	155,46	-6,98	2,28	3,06	2,19E-03	1,64E-01	1	6	0	2	5	4	5	74	1752	4	3	9	1	62	-0,45	6,81	-7,26	ADGRL2	-	chr1_81724580_+	-
chr8:143381179-143381529:mpeak_81252|chr8_143293674_143484610_TSNARE1_NM_-|	7,60	-7,13	3,26	2,18	2,89E-02	5,44E-01	0	23	0	6	14	11	0	37	0	0	0	0	64	#DIV/0!	-0,42	Inf	-Inf	TSNARE1	chr8:143381166:-;chr8:143381229:-;chr8:143381285:-;chr8:143381364:-;chr8:143381423:-;chr8:143381477:-	chr8_142299806_-;chr8_142299871_-;chr8_142299925_-;chr8_142300064_-;chr8_142300119_-	uc011lju.2:143310844:143436085:-;uc003ywj.3:143310844:143436085:-;uc003ywk.3:143310844:143436085:-;uc003ywl.4:143353007:143436085:-
chr8:104780718-104780789:mpeak_80456|chr8_104512975_105263829_RIMS2_NM_+|	147,38	-7,34	2,60	2,83	4,72E-03	2,36E-01	5	5	6	2	1	2	0	65	1680	0	2	0	1	102	1,91	9,30	-7,39	RIMS2	-	-	uc003ylp.3:104513114:105264048:+
chr9:86409324-86409374:mpeak_82892|chr9_86354659_86432752_GKAP1_NM_-|	35,97	-7,35	2,60	2,83	4,70E-03	2,36E-01	0	0	0	4	3	3	1	12	381	12	14	2	#DIV/0!	33	-Inf	3,83	-Inf	GKAP1	chr9:86409323:-	chr9_83794409_-	uc004amy.3:86354611:86421432:-;uc004amz.3:86354611:86421432:-
chr15:56030320-56030557:mpeak_28292|chr15_55912464_56035317_PRTG_NM_-|	9,12	-7,61	3,24	2,35	1,87E-02	4,43E-01	9	5	0	1	2	9	0	0	83	0	0	0	8	#DIV/0!	0,16	Inf	-Inf	PRTG	chr15:56030317:-;chr15:56030417:-;chr15:56030499:-	chr15_55738122_-;chr15_55738206_-	uc002adg.3:55912209:56035129:-
chrX:64955211-64955307:mpeak_86311|chrX_64887510_64959590_MSN_NM_+|	191,95	-7,67	2,31	3,33	8,80E-04	9,56E-02	2	24	0	4	1	3	8	1171	1089	2	1	0	2	245	1,90	9,64	-7,75	MSN	-	-	uc004dwf.3:64887708:64959755:+
chr20:40068631-40068694:mpeak_51539|chr20_40034129_40247133_CHD6_NM_-|	192,60	-7,67	2,61	2,93	3,34E-03	2,07E-01	0	0	0	4	3	4	2	50	2101	61	61	25	#DIV/0!	8	-Inf	3,87	-Inf	CHD6	-	-	uc002xkb.1:40065865:40076592:-;uc002xka.1:40033232:40179976:-
chr14:47669911-47669971:mpeak_24692|chr14_47528199_47812449_MDGA2_NR_-mpeak_24692|chr14_47311222_48144157_MDGA2_NM_-||	13,12	-7,83	2,46	3,18	1,47E-03	1,30E-01	3	8	0	5	7	4	9	4	116	0	0	0	13	1180	-0,51	8,11	-8,63	MDGA2	-	-	uc001wwj.4:47311133:48143999:-
chr12:72050126-72050227:mpeak_19853|chr12_72004345_72057749_ZFC3H1_NM_-|	34,92	-7,84	2,93	2,68	7,42E-03	2,83E-01	0	0	0	0	5	3	0	13	381	2	11	4	#DIV/0!	69	-Inf	4,53	-Inf	ZFC3H1	chr12:72050123:-	chr12_71656338_-	uc001swo.2:72004207:72057390:-
chr4:96181269-96181331:mpeak_62758|chr4_96090550_96470361_UNC5C_NM_-|	48,38	-9,00	2,95	3,06	2,24E-03	1,64E-01	126	47	28	69	43	69	0	0	199	0	0	0	34	#DIV/0!	0,15	Inf	-Inf	UNC5C	-	-	uc003hto.3:96090384:96470008:-;uc010ilc.2:96106197:96470008:-;uc003htq.3:96137270:96470008:-
chr7:82543674-82543747:mpeak_75782|chr7_82388031_82792197_PCLO_NM_-|	11,28	-9,45	3,12	3,03	2,44E-03	1,71E-01	0	9	0	5	11	8	0	2	99	0	0	0	18	#DIV/0!	-1,49	Inf	-Inf	PCLO	chr7:82543691:-	chr7_82914358_-	uc003uhx.2:82387890:82791908:-;uc003uhv.2:82451793:82791908:-
chr2:211013718-211013783:mpeak_49285|chr2_210887903_211036094_KANSL1L_NM_-|	8,77	-9,59	3,40	2,82	4,83E-03	2,38E-01	0	3	0	3	6	5	0	0	88	0	0	0	4	#DIV/0!	-2,09	Inf	-Inf	KANSL1L	chr2:211013729:-	chr2_210148994_-;chr2_210149056_-	uc002vdx.1:210908636:211019306:-;uc002vdv.3:210905054:211019306:-;uc002vdw.3:210905054:211019306:-;uc002vds.3:210887672:211019306:-;uc002vdt.3:210887672:211019306:-
chr1:240334394-240334480:mpeak_8551|chr1_240255184_240637427_FMN2_NM_+|	44,17	-10,38	2,85	3,65	2,67E-04	3,66E-02	8	13	0	5	5	11	0	17	470	0	0	0	4	#DIV/0!	-0,02	Inf	-Inf	FMN2	-	-	uc010pyd.2:240255409:240637454:+;uc010pye.2:240255409:240637454:+
chr15:92647912-92648068:mpeak_29728|chr15_92396937_92715009_SLCO3A1_NM_+|	12,31	-10,47	3,16	3,31	9,30E-04	9,83E-02	0	3	0	2	10	3	3	0	127	0	0	0	4	#DIV/0!	-2,48	Inf	-Inf	SLCO3A1	chr15:92647987:+;chr15:92648061:+	chr15_92104768_+;chr15_92104833_+	uc002bqx.2:92397138:92706365:+;uc002bqy.2:92397138:92715092:+;uc002bqz.1:92432429:92706227:+
chr1:72739874-72739984:mpeak_3142|chr1_71873253_72748277_NEGR1_NM_-|	51,90	-10,65	2,90	3,67	2,46E-04	3,54E-02	28	6	0	10	10	16	0	12	542	0	0	0	6	#DIV/0!	-0,06	Inf	-Inf	NEGR1	-	-	uc001dfw.3:71873128:72748177:-;uc010oqs.2:71873128:72748177:-
chr13:32999061-32999214:mpeak_22430|chr13_32977337_33002315_N4BP2L1_NM_-|	18,60	-10,93	3,39	3,23	1,24E-03	1,19E-01	3	1	0	1	1	13	0	0	205	0	0	0	1	#DIV/0!	-2,07	Inf	-Inf	N4BP2L1	chr13:32999059:-;chr13:32999159:-	chr13_32424924_-;chr13_32425000_-	uc001uuc.3:32977078:33002219:-;uc001uud.3:32977280:33002219:-;uc001uuf.3:32981590:33002219:-
chr12:20704359-20704513:mpeak_17811|chr12_20522178_20832963_PDE3A_NM_+|	39,37	-21,31	3,08	6,91	4,70E-12	1,13E-09	14	7	83	12	6	13	0	0	337	0	0	0	10	#DIV/0!	1,77	Inf	-Inf	PDE3A	chr12:20704412:+;chr12:20704452:+;chr12:20704478:+;chr12:20704503:+	-	uc001reh.2:20522218:20833205:+
chr14:32953703-32954332:mpeak_24382|chr14_32798478_33299053_AKAP6_NM_+|	1198,07	-21,66	3,25	6,67	2,54E-11	5,23E-09	9663	2028	83	496	795	338	0	0	973	0	0	0	403	#DIV/0!	2,85	Inf	-Inf	AKAP6	-	chr14_32484842_+;chr14_32484944_+;chr14_32485032_+;chr14_32485078_+;chr14_32485123_+	uc010aml.3:32902708:33201887:+;uc001wrq.3:32902699:33293979:+
chr12:20704643-20704784:mpeak_17812|chr12_20522178_20832963_PDE3A_NM_+|	33,05	-21,73	3,27	6,65	3,01E-11	5,98E-09	14	28	0	9	1	7	0	0	337	0	0	0	6	#DIV/0!	1,25	Inf	-Inf	PDE3A	-	-	uc001reh.2:20522218:20833205:+
chr12:20705199-20705438:mpeak_17814|chr12_20522178_20832963_PDE3A_NM_+|	64,56	-22,92	3,25	7,04	1,88E-12	4,71E-10	65	156	0	64	55	97	0	0	337	0	0	0	33	#DIV/0!	0,03	Inf	-Inf	PDE3A	-	-	uc001reh.2:20522218:20833205:+
chr11:84730212-84730295:mpeak_15691|chr11_83170967_85338314_DLG2_NM_-|	200,34	-24,06	3,07	7,84	4,52E-15	3,25E-12	540	215	55	310	307	385	0	0	591	0	0	0	46	#DIV/0!	-0,31	Inf	-Inf	DLG2	-	chr11_85019181_-	uc001pak.2:83170860:85309740:-
chr12:20706428-20706567:mpeak_17818|chr12_20522178_20832963_PDE3A_NM_+|	30,07	-24,13	3,25	7,42	1,21E-13	4,35E-11	5	2	0	7	2	7	0	0	337	0	0	0	1	#DIV/0!	-1,34	Inf	-Inf	PDE3A	-	-	uc001reh.2:20522218:20833205:+
chr11:84731854-84731904:mpeak_15692|chr11_83170967_85338314_DLG2_NM_-|	64,82	-24,14	3,26	7,41	1,30E-13	4,39E-11	32	49	0	42	29	35	0	0	591	0	0	0	7	#DIV/0!	-0,40	Inf	-Inf	DLG2	-	-	uc001pak.2:83170860:85309740:-
chr11:85163083-85163188:mpeak_15695|chr11_83170967_85338314_DLG2_NM_-|	50,37	-25,50	3,35	7,62	2,59E-14	1,35E-11	2	1	0	4	4	2	0	0	591	0	0	0	0	#DIV/0!	-2,01	Inf	-Inf	DLG2	-	-	uc001pak.2:83170860:85309740:-
