# Supplementary material for: Compartment-specific and ELAVL1-coordinated regulation of intronic polyadenylation isoforms by doxorubicin
Source: HighWire-hosted journal article supplement (doi:10.1101/gr.276192.121), 2022-07-01
Supplement: Supplemental_Table_S10.xlsx.xlsx [file Supplemental_Table_S10.xlsx.xlsx]

## Sheet: Feuil1
Supplemental Table S10 : List of 197 IPA isoforms from Fig. 3A.
IPA peak	strand	gene	list	chromosome	start	end	IPA peak		strand	refSeq CDS
chr10:12597015-12597076:mpeak_120|chr10_12391541_12870767_CAMK1D_NM_+	+	CAMK1D	IPA_up_by_Doxo_in_Poly_at_6h	chr10	12597015	12597075	chr10:12597015-12597075:mpeak_8275|chr10_12391541_12870767_CAMK1D_NM_+|	22	+	uc001iln.3:12391817:12867724:+;uc001ilo.3:12391817:12870886:+
chr10:128821459-128821527:mpeak_173|chr10_128593977_129249595_DOCK1_NM_+	+	DOCK1	IPA_up_by_Doxo_in_Poly_at_6h	chr10	128821461	128821522	chr10:128821461-128821522:mpeak_11364|chr10_128593977_129249595_DOCK1_NM_+|	8	+	uc031pxq.1:128821375:128823194:+;uc001ljt.3:128594086:129249691:+;uc010qun.2:128594086:129249691:+
chr10:134540765-134540860:mpeak_175|chr10_134351352_134595540_INPP5A_NM_+	+	INPP5A	IPA_up_by_Doxo_in_Poly_at_6h	chr10	134540765	134540852	chr10:134540765-134540852:mpeak_11468|chr10_134351352_134595540_INPP5A_NM_+|	75	+	uc001llo.1:134351600:134591361:+;uc001llp.3:134351600:134595445:+;uc001llq.3:134459398:134595445:+
chr10:34632798-34632860:mpeak_135|chr10_34400490_35104253_PARD3_NM_-	-	PARD3	IPA_up_by_Doxo_in_Poly_at_6h	chr10	34632800	34632860	chr10:34632800-34632860:mpeak_8856|chr10_34400490_35104253_PARD3_NM_-|	26	-	uc001ixs.1:34606036:34671825:-;uc001ixt.1:34606036:34759189:-;uc001ixu.2:34606036:35103923:-;uc010qej.2:34400096:35103923:-;uc010qek.2:34400096:35103923:-;uc010qel.2:34400096:35103923:-;uc010qem.2:34400096:35103923:-;uc010qen.2:34400096:35103923:-;uc010qeo.2:34400096:35103923:-;uc010qep.2:34400096:35103923:-;uc010qeq.2:34400096:35103923:-;uc001ixo.2:34601279:34688337:-;uc001ixr.2:34601279:3510392…
chr10:63662474-63662563:mpeak_143|chr10_63661012_63850620_ARID5B_NM_+	+	ARID5B	IPA_up_by_Doxo_in_Poly_at_6h	chr10	63662507	63662728	chr10:63662507-63662728:mpeak_9265|chr10_63661012_63850620_ARID5B_NM_+|	46	+	uc010qil.2:63661468:63810870:+;uc001jlt.2:63661468:63852789:+
chr10:63662674-63662733:mpeak_144|chr10_63661012_63850620_ARID5B_NM_+	+	ARID5B	IPA_up_by_Doxo_in_Poly_at_6h	chr10	63662507	63662728	chr10:63662507-63662728:mpeak_9265|chr10_63661012_63850620_ARID5B_NM_+|	46	+	uc010qil.2:63661468:63810870:+;uc001jlt.2:63661468:63852789:+
chr10:75570440-75570501:mpeak_148|chr10_75562334_75571589_NDST2_NM_-	-	NDST2	IPA_up_by_Doxo_in_Poly_at_6h	chr10	75570440	75570524	chr10:75570440-75570524:mpeak_9720|chr10_75562334_75571589_NDST2_NM_-|	20	-	-
chr10:82269968-82270042:mpeak_151|chr10_82214037_82277660_TSPAN14_NM_+	+	TSPAN14	IPA_up_by_Doxo_in_Poly_at_6h	chr10	82269968	82270038	chr10:82269968-82270038:mpeak_9911|chr10_82214037_82277660_TSPAN14_NM_+|	228	+	uc001kcj.4:82248989:82277732:+;uc009xss.3:82248989:82277732:+;uc001kci.4:82248989:82277732:+
chr10:91393899-91393958:mpeak_154|chr10_91344222_91405329_PANK1_NM_-	-	PANK1	IPA_up_by_Doxo_in_Poly_at_6h	chr10	91393902	91393958	chr10:91393902-91393958:mpeak_10072|chr10_91344222_91405329_PANK1_NM_-|	42	-	uc001kgn.2:91344162:91403481:-;uc001kgo.2:91344162:91403481:-;uc009xtu.2:91344162:91403468:-;uc001kgp.2:91344162:91405059:-
chr10:93711151-93711207:mpeak_157|chr10_93683735_93788546_BTAF1_NM_+	+	BTAF1	IPA_up_by_Doxo_in_Poly_at_18h	chr10	93711146	93711314	chr10:93711146-93711314:mpeak_11167|chr10_93683735_93788546_BTAF1_NM_+|	19.74	+	uc001khr.3:93683833:93788690:+
chr10:93711151-93711207:mpeak_157|chr10_93683735_93788546_BTAF1_NM_+	+	BTAF1	IPA_up_by_Doxo_in_Poly_at_6h	chr10	93711146	93711220	chr10:93711146-93711220:mpeak_10127|chr10_93683735_93788546_BTAF1_NM_+|	13	+	uc001khr.3:93683833:93788690:+
chr1:100585940-100585995:mpeak_49|chr1_100550990_100598651_SASS6_NM_-	-	SASS6	IPA_up_by_Doxo_in_Poly_at_6h	chr1	100585941	100585992	chr1:100585941-100585992:mpeak_3286|chr1_100550990_100598651_SASS6_NM_-|	4	-	uc001dsu.3:100550883:100598370:-;uc009wdz.3:100550883:100585997:-
chr1:113617479-113617529:mpeak_54|chr1_113615791_113666496_LRIG2_NM_+	+	LRIG2	IPA_up_by_Doxo_in_Poly_at_6h	chr1	113617480	113617529	chr1:113617480-113617529:mpeak_3768|chr1_113615791_113666496_LRIG2_NM_+|	16	+	uc001edf.1:113616028:113666723:+
chr1:1327582-1327761:mpeak_1|chr1_1322962_1334718_CCNL2_NM_-	-	CCNL2	IPA_up_by_Doxo_in_Poly_at_6h	chr1	1327656	1327931	chr1:1327656-1327931:mpeak_85|chr1_1322962_1334718_CCNL2_NM_-|	46	-	uc001afi.2:1322610:1334686:-
chr11:33162957-33163267:mpeak_188|chr11_33106835_33183037_CSTF3_NM_-	-	CSTF3	IPA_up_by_Doxo_in_Poly_at_18h	chr11	33162957	33163102	chr11:33162957-33163102:mpeak_13618|chr11_33106835_33183037_CSTF3_NM_-|	84.97	-	uc001muh.3:33106632:33182871:-
chr11:47761117-47761184:mpeak_197|chr11_47739064_47788993_FNBP4_NM_-	-	FNBP4	IPA_up_by_Doxo_in_Poly_at_6h	chr11	47761058	47761184	chr11:47761058-47761184:mpeak_12728|chr11_47739064_47788993_FNBP4_NM_-|	10	-	uc001ngj.3:47738973:47786855:-;uc009ylv.3:47738973:47788840:-
chr11:47765453-47765705:mpeak_198|chr11_47739064_47788993_FNBP4_NM_-	-	FNBP4	IPA_up_by_Doxo_in_Poly_at_6h	chr11	47765460	47765544	chr11:47765460-47765544:mpeak_12729|chr11_47739064_47788993_FNBP4_NM_-|	14	-	uc001ngj.3:47738973:47786855:-;uc009ylv.3:47738973:47788840:-
chr1:148568202-148568273:mpeak_65|chr1_148558187_148594396_NBPF15_NM_+	+	NBPF15	IPA_up_by_Doxo_in_Poly_at_6h	chr1	148568205	148568273	chr1:148568205-148568273:mpeak_4534|chr1_148558187_148594396_NBPF15_NM_+|	48	+	-
chr1:150902811-150902973:mpeak_69|chr1_150898814_150936722_SETDB1_NM_+	+	SETDB1	IPA_up_by_Doxo_in_Poly_at_6h	chr1	150902864	150902966	chr1:150902864-150902966:mpeak_4766|chr1_150898814_150936722_SETDB1_NM_+|	62	+	uc001evw.4:150900190:150917638:+;uc009wmf.2:150900190:150923564:+;uc009wmg.2:150900190:150936322:+;uc001evv.2:150900190:150936840:+;uc001evu.2:150900190:150936840:+
chr1:155648893-155649049:mpeak_81|chr1_155630724_155658823_YY1AP1_NM_-	-	YY1AP1	IPA_up_by_Doxo_in_Poly_at_6h	chr1	155648898	155649049	chr1:155648898-155649049:mpeak_5214|chr1_155630724_155658823_YY1AP1_NM_-|	238	-	uc010pgh.2:155629447:155649291:-;uc009wqt.3:155629447:155649291:-;uc001flh.3:155629447:155658255:-;uc010pgi.2:155629447:155658255:-;uc009wqx.3:155631019:155658255:-;uc010pgk.2:155638560:155658255:-;uc001fll.3:155629447:155650227:-;uc001flk.3:155629447:155649291:-;uc001flm.3:155629447:155649291:-;uc009wqw.3:155629447:155649291:-;uc001flj.3:155629447:155650227:-;uc001fli.3:155629447:155650227:-;uc0…
chr11:66799088-66799164:mpeak_208|chr11_66790189_66816054_SYT12_NM_+	+	SYT12	IPA_up_by_Doxo_in_Poly_at_6h	chr11	66799083	66799161	chr11:66799083-66799161:mpeak_13619|chr11_66790189_66816054_SYT12_NM_+|	99	+	uc009yrl.3:66797615:66816228:+;uc001oju.3:66797615:66816228:+
chr11:67933180-67933279:mpeak_209|chr11_67926638_67981239_SUV420H1_NM_-	-	SUV420H1	IPA_up_by_Doxo_in_Poly_at_6h	chr11	67933182	67933239	chr11:67933182-67933239:mpeak_13711|chr11_67926638_67981239_SUV420H1_NM_-|	77	-	uc001onm.1:67925154:67957543:-;uc001onn.1:67925154:67942511:-;uc009ysf.2:67925154:67939109:-
chr11:68142819-68142901:mpeak_210|chr11_68080076_68216276_LRP5_NM_+	+	LRP5	IPA_up_by_Doxo_in_Poly_at_6h	chr11	68142825	68142896	chr11:68142825-68142896:mpeak_13722|chr11_68080076_68216276_LRP5_NM_+|	60	+	uc001ont.3:68080182:68216538:+
chr1:16928871-16928921:mpeak_14|chr1_16890681_16940100_NBPF1_NM_-	-	NBPF1	IPA_up_by_Doxo_in_Poly_at_6h	chr1	16928865	16928965	chr1:16928865-16928965:mpeak_722|chr1_16890681_16940100_NBPF1_NM_-|	120	-	-
chr11:70050040-70050111:mpeak_212|chr11_70049268_70052238_FADD_NM_+	+	FADD	IPA_up_by_Doxo_in_Poly_at_18h	chr11	70050045	70050097	chr11:70050045-70050097:mpeak_15164|chr11_70049268_70052238_FADD_NM_+|	87.42	+	uc001opm.2:70049565:70052579:+
chr11:73221716-73221863:mpeak_214|chr11_73117789_73309234_FAM168A_NM_-	-	FAM168A	IPA_up_by_Doxo_in_Poly_at_6h	chr11	73221739	73221809	chr11:73221739-73221809:mpeak_14011|chr11_73117789_73309234_FAM168A_NM_-|	73	-	-
chr11:76503792-76503847:mpeak_217|chr11_76493356_76506652_TSKU_NM_+	+	TSKU	IPA_up_by_Doxo_in_Poly_at_6h	chr11	76503791	76503842	chr11:76503791-76503842:mpeak_14162|chr11_76493356_76506652_TSKU_NM_+|	78	+	-
chr11:77897617-77897673:mpeak_222|chr11_77885629_77899675_KCTD21_NM_-	-	KCTD21	IPA_up_by_Doxo_in_Poly_at_6h	chr11	77897622	77897672	chr11:77897622-77897672:mpeak_14238|chr11_77885629_77899675_KCTD21_NM_-|	7	-	-
chr1:180366642-180366735:mpeak_88|chr1_180257652_180472022_ACBD6_NM_-	-	ACBD6	IPA_up_by_Doxo_in_Poly_at_6h	chr1	180366642	180366696	chr1:180366642-180366696:mpeak_6085|chr1_180257652_180472022_ACBD6_NM_-|	41	-	uc001gog.3:180257497:180471401:-
chr11:82869726-82869941:mpeak_223|chr11_82868136_82895720_PCF11_NM_+	+	PCF11	IPA_up_by_Doxo_in_Poly_at_6h	chr11	82869820	82869935	chr11:82869820-82869935:mpeak_14274|chr11_82868136_82895720_PCF11_NM_+|	30	+	uc010rsu.1:82868481:82881037:+;uc001ozx.4:82868481:82895936:+
chr1:206702329-206702379:mpeak_95|chr1_206680862_206760157_RASSF5_NM_+	+	RASSF5	IPA_up_by_Doxo_in_Poly_at_6h	chr1	206702492	206702551	chr1:206702492-206702551:mpeak_6840|chr1_206680862_206760157_RASSF5_NM_+|	15	+	uc001hec.1:206680935:206758081:+;uc001hed.3:206680935:206760310:+;uc001hee.3:206680935:206760180:+
chr1:206702499-206702551:mpeak_96|chr1_206680862_206760157_RASSF5_NM_+	+	RASSF5	IPA_up_by_Doxo_in_Poly_at_6h	chr1	206702492	206702551	chr1:206702492-206702551:mpeak_6840|chr1_206680862_206760157_RASSF5_NM_+|	15	+	uc001hec.1:206680935:206758081:+;uc001hed.3:206680935:206760310:+;uc001hee.3:206680935:206760180:+
chr12:102159536-102159592:mpeak_280|chr12_102141019_102224645_GNPTAB_NM_-	-	GNPTAB	IPA_up_by_Doxo_in_Poly_at_6h	chr12	102159536	102159592	chr12:102159536-102159592:mpeak_18646|chr12_102141019_102224645_GNPTAB_NM_-|	29	-	uc001tit.3:102140941:102224453:-
chr12:122262340-122262412:mpeak_290|chr12_122242637_122267971_SETD1B_NM_+	+	SETD1B	IPA_up_by_Doxo_in_Poly_at_6h	chr12	122262340	122262390	chr12:122262340-122262390:mpeak_19586|chr12_122242637_122267971_SETD1B_NM_+|	213	+	uc001ubi.3:122242643:122268145:+
chr12:12351822-12351894:mpeak_246|chr12_12274354_12419811_LRP6_NM_-	-	LRP6	IPA_up_by_Doxo_in_Poly_at_6h	chr12	12351828	12351889	chr12:12351828-12351889:mpeak_15823|chr12_12274354_12419811_LRP6_NM_-|	38	-	uc001rah.4:12274059:12419669:-;uc010shl.1:12274059:12419669:-
chr12:123801834-123801912:mpeak_294|chr12_123780597_123834988_SBNO1_NM_-	-	SBNO1	IPA_up_by_Doxo_in_Poly_at_6h	chr12	123801834	123801912	chr12:123801834-123801912:mpeak_19766|chr12_123780597_123834988_SBNO1_NM_-|	81	-	uc010tao.2:123780454:123834988:-;uc010tap.2:123780454:123834988:-
chr12:124197914-124197973:mpeak_298|chr12_124196864_124242473_ATP6V0A2_NM_+	+	ATP6V0A2	IPA_up_by_Doxo_in_Poly_at_6h	chr12	124197915	124197970	chr12:124197915-124197970:mpeak_19832|chr12_124196864_124242473_ATP6V0A2_NM_+|	70	+	uc001ufq.1:124197112:124221899:+;uc001ufr.3:124197112:124242579:+
chr12:132419418-132419495:mpeak_302|chr12_132413744_132428083_PUS1_NM_+	+	PUS1	IPA_up_by_Doxo_in_Poly_at_6h	chr12	132419417	132419495	chr12:132419417-132419495:mpeak_19973|chr12_132413744_132428083_PUS1_NM_+|	109	+	uc001uji.3:132416575:132428131:+;uc001ujg.3:132414461:132428131:+;uc001ujh.3:132414461:132428131:+;uc001ujf.3:132414267:132428131:+
chr12:133310425-133310569:mpeak_304|chr12_133304029_133338474_ANKLE2_NM_-	-	ANKLE2	IPA_up_by_Doxo_in_Poly_at_6h	chr12	133310425	133310572	chr12:133310425-133310572:mpeak_20069|chr12_133304029_133338474_ANKLE2_NM_-|	89	-	uc001ukx.2:133303827:133338384:-
chr1:228823174-228823471:mpeak_107|chr1_228780393_228879031_RHOU_NR_+	+	RHOU	IPA_up_by_Doxo_in_Poly_at_18h	chr1	228823222	228823288	chr1:228823222-228823288:mpeak_8170|chr1_228780393_228879031_RHOU_NR_+|	23.34	+	-
chr1:228823174-228823471:mpeak_107|chr1_228780393_228879031_RHOU_NR_+	+	RHOU	IPA_up_by_Doxo_in_Poly_at_6h	chr1	228823222	228823288	chr1:228823222-228823288:mpeak_7463|chr1_228780393_228879031_RHOU_NR_+|	33	+	-
chr12:49718073-49718282:mpeak_256|chr12_49716970_49725355_TROAP_NM_+	+	TROAP	IPA_up_by_Doxo_in_Poly_at_6h	chr12	49718076	49718249	chr12:49718076-49718249:mpeak_16771|chr12_49716970_49725355_TROAP_NM_+|	60	+	uc001rtx.4:49717391:49725400:+;uc009zlh.3:49717391:49725400:+
chr12:56307527-56307676:mpeak_260|chr12_56296139_56321697_WIBG_NM_-	-	WIBG	IPA_up_by_Doxo_in_Poly_at_18h	chr12	56307533	56307668	chr12:56307533-56307668:mpeak_19134|chr12_56296139_56321697_WIBG_NM_-|	52.59	-	uc001sie.1:56295655:56320893:-;uc001sif.1:56295655:56321545:-
chr12:56307527-56307676:mpeak_260|chr12_56296139_56321697_WIBG_NM_-	-	WIBG	IPA_up_by_Doxo_in_Poly_at_6h	chr12	56307533	56307676	chr12:56307533-56307676:mpeak_17314|chr12_56296139_56321697_WIBG_NM_-|	91	-	uc001sie.1:56295655:56320893:-;uc001sif.1:56295655:56321545:-
chr12:6440252-6440302:mpeak_244|chr12_6438788_6451283_TNFRSF1A_NM_-	-	TNFRSF1A	IPA_up_by_Doxo_in_Poly_at_6h	chr12	6440247	6440302	chr12:6440247-6440302:mpeak_15528|chr12_6438788_6451283_TNFRSF1A_NM_-|	153	-	uc001qnt.3:6438477:6442680:-;uc001qnu.3:6438477:6450980:-;uc010sez.2:6438477:6442680:-;uc009zek.3:6438477:6450980:-
chr12:80082132-80082184:mpeak_275|chr12_79986473_80084790_PAWR_NM_-	-	PAWR	IPA_up_by_Doxo_in_Poly_at_6h	chr12	80082128	80082183	chr12:80082128-80082183:mpeak_18229|chr12_79986473_80084790_PAWR_NM_-|	70	-	uc001syx.3:79986386:80084024:-
chr12:98929301-98929433:mpeak_279|chr12_98909350_98941350_TMPO_NM_+	+	TMPO	IPA_up_by_Doxo_in_Poly_at_6h	chr12	98929346	98929430	chr12:98929346-98929430:mpeak_18523|chr12_98909350_98941350_TMPO_NM_+|	620	+	uc001tfi.2:98909645:98931434:+;uc001tfj.3:98909645:98941636:+;uc001tfk.3:98909645:98941636:+
chr13:115087811-115087920:mpeak_337|chr13_115079964_115089262_CHAMP1_NM_+	+	CHAMP1	IPA_up_by_Doxo_in_Poly_at_6h	chr13	115087811	115087914	chr13:115087811-115087914:mpeak_21815|chr13_115079964_115089262_CHAMP1_NM_+|	16	+	-
chr13:27648906-27649047:mpeak_310|chr13_27643521_27746033_USP12_NM_-	-	USP12	IPA_up_by_Doxo_in_Poly_at_6h	chr13	27648997	27649048	chr13:27648997-27649048:mpeak_20436|chr13_27643521_27746033_USP12_NM_-|	43	-	uc001uqy.3:27643419:27745776:-
chr13:28224338-28224406:mpeak_311|chr13_28194879_28239822_POLR1D_NM_+	+	POLR1D	IPA_up_by_Doxo_in_Poly_at_6h	chr13	28224338	28224456	chr13:28224338-28224456:mpeak_20462|chr13_28194879_28239822_POLR1D_NM_+|	69	+	uc010aam.3:28222573:28240090:+;uc001urp.3:28196120:28240090:+
chr1:33234414-33234558:mpeak_22|chr1_33207511_33238465_KIAA1522_NM_+	+	KIAA1522	IPA_up_by_Doxo_in_Poly_at_18h	chr1	33234446	33234501	chr1:33234446-33234501:mpeak_1715|chr1_33207511_33238465_KIAA1522_NM_+|	25.95	+	uc001bvv.2:33231370:33238488:+;uc010ohn.1:33231370:33238488:+;uc001bvu.1:33207555:33238488:+;uc010ohm.1:33219690:33238488:+
chr1:33234414-33234558:mpeak_22|chr1_33207511_33238465_KIAA1522_NM_+	+	KIAA1522	IPA_up_by_Doxo_in_Poly_at_6h	chr1	33234447	33234499	chr1:33234447-33234499:mpeak_1545|chr1_33207511_33238465_KIAA1522_NM_+|	45	+	uc001bvv.2:33231370:33238488:+;uc010ohn.1:33231370:33238488:+;uc001bvu.1:33207555:33238488:+;uc010ohm.1:33219690:33238488:+
chr13:42640805-42640858:mpeak_324|chr13_42614171_42803234_DGKH_NM_+	+	DGKH	IPA_up_by_Doxo_in_Poly_at_6h	chr13	42640807	42640863	chr13:42640807-42640863:mpeak_20831|chr13_42614171_42803234_DGKH_NM_+|	30	+	uc010tfh.2:42622909:42803287:+;uc001uyl.2:42622909:42803324:+;uc001uym.2:42622909:42803287:+
chr13:46039894-46039954:mpeak_326|chr13_46039029_46108836_COG3_NM_+	+	COG3	IPA_up_by_Doxo_in_Poly_at_6h	chr13	46039895	46039946	chr13:46039895-46039946:mpeak_20938|chr13_46039029_46108836_COG3_NM_+|	34	+	uc001vai.3:46039171:46067629:+;uc001vak.3:46039171:46108866:+
chr1:39918429-39918493:mpeak_25|chr1_39549838_39951209_MACF1_NM_+	+	MACF1	IPA_up_by_Doxo_in_Poly_at_6h	chr1	39918429	39918493	chr1:39918429-39918493:mpeak_1882|chr1_39549838_39951209_MACF1_NM_+|	37	+	uc031pme.1:39903469:39951466:+;uc031pmc.1:39549890:39951466:+;uc021olt.1:39549890:39951466:+
chr14:102290700-102290814:mpeak_393|chr14_102228134_102391477_PPP2R5C_NM_+	+	PPP2R5C	IPA_up_by_Doxo_in_Poly_at_6h	chr14	102290748	102290814	chr14:102290748-102290814:mpeak_24490|chr14_102228134_102391477_PPP2R5C_NM_+|	63	+	uc010txs.1:102276309:102348626:+;uc001ykj.4:102228230:102302517:+;uc010txt.2:102276309:102372870:+;uc001ykn.3:102276279:102378834:+;uc010txr.2:102228230:102391609:+;uc001ykk.3:102228230:102391609:+;uc001yko.3:102276279:102391609:+;uc001ykp.3:102276279:102391609:+
chr14:102302822-102302911:mpeak_394|chr14_102228134_102391477_PPP2R5C_NM_+	+	PPP2R5C	IPA_up_by_Doxo_in_Poly_at_6h	chr14	102302837	102302912	chr14:102302837-102302912:mpeak_24492|chr14_102228134_102391477_PPP2R5C_NM_+|	70	+	uc010txs.1:102276309:102348626:+;uc010txt.2:102276309:102372870:+;uc001ykn.3:102276279:102378834:+;uc010txr.2:102228230:102391609:+;uc001ykk.3:102228230:102391609:+;uc001yko.3:102276279:102391609:+;uc001ykp.3:102276279:102391609:+
chr14:103090486-103090536:mpeak_395|chr14_103058995_103192804_RCOR1_NM_+	+	RCOR1	IPA_up_by_Doxo_in_Poly_at_6h	chr14	103090486	103090536	chr14:103090486-103090536:mpeak_24580|chr14_103058995_103192804_RCOR1_NM_+|	41	+	uc001ymb.4:103059223:103192843:+
chr14:21955967-21956056:mpeak_340|chr14_21945334_21964703_TOX4_NM_+	+	TOX4	IPA_up_by_Doxo_in_Poly_at_6h	chr14	21955970	21956059	chr14:21955970-21956059:mpeak_21973|chr14_21945334_21964703_TOX4_NM_+|	163	+	uc001waz.3:21945437:21964764:+;uc010tlu.2:21945437:21964764:+
chr14:21975974-21976115:mpeak_341|chr14_21966513_21979517_METTL3_NM_-	-	METTL3	IPA_up_by_Doxo_in_Poly_at_18h	chr14	21975978	21976048	chr14:21975978-21976048:mpeak_24004|chr14_21966513_21979517_METTL3_NM_-|	25.73	-	uc001wbc.3:21966401:21979365:-;uc010tlx.2:21969850:21979365:-;uc021rox.1:21969912:21979365:-
chr14:23754303-23754364:mpeak_342|chr14_23746396_23755309_HOMEZ_NM_-	-	HOMEZ	IPA_up_by_Doxo_in_Poly_at_18h	chr14	23754303	23754361	chr14:23754303-23754361:mpeak_24101|chr14_23746396_23755309_HOMEZ_NM_-|	19.43	-	uc001wja.2:23744783:23755161:-;uc001wjb.2:23744783:23762785:-
chr14:23754303-23754364:mpeak_342|chr14_23746396_23755309_HOMEZ_NM_-	-	HOMEZ	IPA_up_by_Doxo_in_Poly_at_6h	chr14	23754307	23754361	chr14:23754307-23754361:mpeak_22085|chr14_23746396_23755309_HOMEZ_NM_-|	28	-	uc001wja.2:23744783:23755161:-;uc001wjb.2:23744783:23762785:-
chr14:23945246-23945364:mpeak_343|chr14_23938897_23946711_NGDN_NM_+	+	NGDN	IPA_up_by_Doxo_in_Poly_at_6h	chr14	23945270	23945364	chr14:23945270-23945364:mpeak_22100|chr14_23938897_23946711_NGDN_NM_+|	269	+	uc001wjy.3:23938924:23947235:+;uc001wjz.3:23938924:23946777:+
chr14:38063018-38063146:mpeak_347|chr14_38061916_38064325_FOXA1_NM_-	-	FOXA1	IPA_up_by_Doxo_in_Poly_at_6h	chr14	38063036	38063142	chr14:38063036-38063142:mpeak_22474|chr14_38061916_38064325_FOXA1_NM_-|	164	-	uc001wuf.4:38060569:38064177:-
chr14:50146106-50146402:mpeak_348|chr14_50110388_50155098_POLE2_NM_-	-	POLE2	IPA_up_by_Doxo_in_Poly_at_6h	chr14	50146191	50146399	chr14:50146191-50146399:mpeak_22618|chr14_50110388_50155098_POLE2_NM_-|	32	-	uc001wwu.3:50110369:50154921:-;uc021rsr.1:50110369:50154921:-;uc010ano.3:50116970:50154921:-;uc010anj.1:50033027:50319471:-
chr1:45101957-45102177:mpeak_27|chr1_44870959_45116375_RNF220_NM_+	+	RNF220	IPA_up_by_Doxo_in_Poly_at_6h	chr1	45101979	45102037	chr1:45101979-45102037:mpeak_2107|chr1_44870959_45116375_RNF220_NM_+|	74	+	uc010okz.2:45097826:45115701:+;uc001cma.1:45101230:45115701:+;uc001clx.2:45097826:45116447:+;uc010okx.1:45079928:45110464:+;uc001clv.1:44877769:45116447:+;uc001clw.1:44877769:45116447:+;uc010oky.1:45079928:45116447:+
chr1:45101957-45102177:mpeak_27|chr1_44870959_45116375_RNF220_NM_+	+	RNF220	IPA_up_by_Doxo_in_Poly_at_6h	chr1	45102090	45102175	chr1:45102090-45102175:mpeak_2108|chr1_44870959_45116375_RNF220_NM_+|	88	+	uc010okz.2:45097826:45115701:+;uc001cma.1:45101230:45115701:+;uc001clx.2:45097826:45116447:+;uc010okx.1:45079928:45110464:+;uc001clv.1:44877769:45116447:+;uc001clw.1:44877769:45116447:+;uc010oky.1:45079928:45116447:+
chr14:55765757-55765959:mpeak_358|chr14_55738020_55817098_FBXO34_NM_+	+	FBXO34	IPA_up_by_Doxo_in_Poly_at_6h	chr14	55765772	55765943	chr14:55765772-55765943:mpeak_22921|chr14_55738020_55817098_FBXO34_NM_+|	22	+	-
chr14:75912185-75912259:mpeak_377|chr14_75894508_75935992_JDP2_NM_+	+	JDP2	IPA_up_by_Doxo_in_Poly_at_6h	chr14	75912182	75912240	chr14:75912182-75912240:mpeak_23794|chr14_75894508_75935992_JDP2_NM_+|	82	+	uc010asj.3:75904623:75936178:+;uc010tvb.2:75904623:75936178:+;uc010tvc.2:75904623:75936178:+;uc001xrq.3:75899029:75936178:+
chr14:75913439-75913559:mpeak_378|chr14_75894508_75935992_JDP2_NM_+	+	JDP2	IPA_up_by_Doxo_in_Poly_at_6h	chr14	75913432	75913561	chr14:75913432-75913561:mpeak_23795|chr14_75894508_75935992_JDP2_NM_+|	89	+	uc010asj.3:75904623:75936178:+;uc010tvb.2:75904623:75936178:+;uc010tvc.2:75904623:75936178:+;uc001xrq.3:75899029:75936178:+
chr14:96689707-96689827:mpeak_388|chr14_96671134_96706739_BDKRB2_NM_+	+	BDKRB2	IPA_up_by_Doxo_in_Poly_at_18h	chr14	96689756	96689827	chr14:96689756-96689827:mpeak_26553|chr14_96671134_96706739_BDKRB2_NM_+|	7.09	+	uc010avl.2:96671156:96704153:+
chr15:40862196-40862269:mpeak_407|chr15_40861491_40865725_RPUSD2_NM_+	+	RPUSD2	IPA_up_by_Doxo_in_Poly_at_6h	chr15	40862196	40862271	chr15:40862196-40862271:mpeak_25139|chr15_40861491_40865725_RPUSD2_NM_+|	41	+	uc021sjh.1:40861536:40866460:+;uc001zmd.1:40861536:40866460:+
chr15:41745089-41745148:mpeak_409|chr15_41709301_41772778_RTF1_NM_+	+	RTF1	IPA_up_by_Doxo_in_Poly_at_6h	chr15	41745089	41745148	chr15:41745089-41745148:mpeak_25214|chr15_41709301_41772778_RTF1_NM_+|	100	+	uc001zny.3:41709313:41772885:+
chr15:57022974-57023036:mpeak_419|chr15_56924320_57026284_ZNF280D_NM_-	-	ZNF280D	IPA_up_by_Doxo_in_Poly_at_6h	chr15	57022975	57023034	chr15:57022975-57023034:mpeak_25963|chr15_56924320_57026284_ZNF280D_NM_-|	4	-	-
chr15:91137078-91137221:mpeak_437|chr15_91073117_91185163_CRTC3_NM_+	+	CRTC3	IPA_up_by_Doxo_in_Poly_at_6h	chr15	91137084	91137215	chr15:91137084-91137215:mpeak_27212|chr15_91073117_91185163_CRTC3_NM_+|	21	+	uc002bpn.4:91073303:91141726:+;uc002bpp.4:91073303:91185372:+;uc002bpo.4:91073303:91185372:+
chr15:93482801-93482952:mpeak_440|chr15_93443550_93567601_CHD2_NM_+	+	CHD2	IPA_up_by_Doxo_in_Poly_at_6h	chr15	93482800	93482952	chr15:93482800-93482952:mpeak_27287|chr15_93443550_93567601_CHD2_NM_+|	25	+	uc002bsm.2:93444467:93486365:+;uc002bsn.3:93444467:93492310:+;uc002bso.1:93444467:93563555:+;uc002bsp.3:93444467:93567935:+;uc010urb.2:93448137:93492310:+
chr16:11120845-11121006:mpeak_462|chr16_11038344_11272191_CLEC16A_NM_+	+	CLEC16A	IPA_up_by_Doxo_in_Poly_at_6h	chr16	11120845	11121001	chr16:11120845-11121001:mpeak_28143|chr16_11038344_11272191_CLEC16A_NM_+|	44	+	uc002dan.4:11038574:11220137:+;uc002dao.3:11038574:11272547:+;uc021tcy.1:11038574:11272547:+
chr16:11260739-11260878:mpeak_463|chr16_11038344_11272191_CLEC16A_NM_+	+	CLEC16A	IPA_up_by_Doxo_in_Poly_at_6h	chr16	11260739	11260909	chr16:11260739-11260909:mpeak_28151|chr16_11038344_11272191_CLEC16A_NM_+|	43	+	uc002dao.3:11038574:11272547:+;uc021tcy.1:11038574:11272547:+
chr16:14294437-14294581:mpeak_465|chr16_14165169_14354765_MKL2_NM_+	+	MKL2	IPA_up_by_Doxo_in_Poly_at_6h	chr16	14294437	14294581	chr16:14294437-14294581:mpeak_28269|chr16_14165169_14354765_MKL2_NM_+|	22	+	uc010uzb.2:14294344:14334682:+;uc002dch.3:14280771:14334405:+;uc002dcg.3:14234463:14355301:+;uc010uza.2:14234463:14355301:+
chr16:22087324-22087485:mpeak_471|chr16_22019455_22092016_C16orf52_NM_+	+	C16orf52	IPA_up_by_Doxo_in_Poly_at_6h	chr16	22087327	22087391	chr16:22087327-22087391:mpeak_28601|chr16_22019455_22092016_C16orf52_NM_+|	17	+	uc002dkd.2:22019622:22092201:+
chr16:3336829-3336894:mpeak_451|chr16_3333486_3339392_ZNF263_NM_+	+	ZNF263	IPA_up_by_Doxo_in_Poly_at_6h	chr16	3336826	3336886	chr16:3336826-3336886:mpeak_27846|chr16_3333486_3339392_ZNF263_NM_+|	36	+	uc002cuq.3:3333818:3340558:+
chr16:493989-494048:mpeak_446|chr16_475667_570725_RAB11FIP3_NM_+	+	RAB11FIP3	IPA_up_by_Doxo_in_Poly_at_6h	chr16	493991	494041	chr16:493991-494041:mpeak_27506|chr16_475667_570725_RAB11FIP3_NM_+|	4	+	uc002chf.3:476006:570839:+
chr16:69404234-69404363:mpeak_483|chr16_69390959_69419891_TERF2_NM_-	-	TERF2	IPA_up_by_Doxo_in_Poly_at_6h	chr16	69404233	69404337	chr16:69404233-69404337:mpeak_29890|chr16_69390959_69419891_TERF2_NM_-|	110	-	uc002exd.4:69390800:69419748:-
chr16:69413013-69413105:mpeak_484|chr16_69390959_69419891_TERF2_NM_-	-	TERF2	IPA_up_by_Doxo_in_Poly_at_6h	chr16	69413019	69413102	chr16:69413019-69413102:mpeak_29891|chr16_69390959_69419891_TERF2_NM_-|	111	-	uc002exd.4:69390800:69419748:-;uc002exe.4:69404343:69419874:-
chr16:71732043-71732097:mpeak_488|chr16_71683947_71758604_PHLPP2_NM_-	-	PHLPP2	IPA_up_by_Doxo_in_Poly_at_6h	chr16	71732043	71732097	chr16:71732043-71732097:mpeak_30070|chr16_71683947_71758604_PHLPP2_NM_-|	47	-	uc002fay.1:71712653:71748698:-;uc002fax.3:71682792:71748698:-;uc010cgf.3:71682792:71748698:-
chr16:87986047-87986372:mpeak_496|chr16_87985037_88110195_BANP_NM_+	+	BANP	IPA_up_by_Doxo_in_Poly_at_6h	chr16	87986050	87986166	chr16:87986050-87986166:mpeak_30639|chr16_87985037_88110195_BANP_NM_+|	116	+	-
chr16:87986047-87986372:mpeak_496|chr16_87985037_88110195_BANP_NM_+	+	BANP	IPA_up_by_Doxo_in_Poly_at_6h	chr16	87986300	87986359	chr16:87986300-87986359:mpeak_30640|chr16_87985037_88110195_BANP_NM_+|	120	+	-
chr16:89356454-89356535:mpeak_500|chr16_89353521_89556969_ANKRD11_NR_-	-	ANKRD11	IPA_up_by_Doxo_in_Poly_at_6h	chr16	89356456	89356525	chr16:89356456-89356525:mpeak_30763|chr16_89353521_89556969_ANKRD11_NR_-mpeak_30763|chr16_89335071_89556969_ANKRD11_NM_-||	25	-	uc002fnb.1:89345479:89358185:-;uc002fnd.3:89354875:89371640:-;uc002fmy.2:89334885:89383427:-;uc002fmx.2:89334885:89383427:-;uc002fnc.2:89334885:89383427:-;uc002fne.4:89353512:89371640:-
chr16:89358093-89358155:mpeak_501|chr16_89335071_89556969_ANKRD11_NM_-	-	ANKRD11	IPA_up_by_Doxo_in_Poly_at_6h	chr16	89358093	89358155	chr16:89358093-89358155:mpeak_30765|chr16_89353521_89556969_ANKRD11_NR_-mpeak_30765|chr16_89335071_89556969_ANKRD11_NM_-||	25	-	uc002fnb.1:89345479:89358185:-;uc002fnd.3:89354875:89371640:-;uc002fmy.2:89334885:89383427:-;uc002fmx.2:89334885:89383427:-;uc002fnc.2:89334885:89383427:-;uc002fne.4:89353512:89371640:-
chr16:89383333-89383542:mpeak_503|chr16_89335071_89556969_ANKRD11_NM_-	-	ANKRD11	IPA_up_by_Doxo_in_Poly_at_6h	chr16	89383338	89383405	chr16:89383338-89383405:mpeak_30773|chr16_89353521_89556969_ANKRD11_NR_-mpeak_30773|chr16_89335071_89556969_ANKRD11_NM_-||	37	-	uc002fnf.1:89367221:89383427:-;uc002fmy.2:89334885:89383427:-;uc002fmx.2:89334885:89383427:-;uc002fnc.2:89334885:89383427:-;uc002fng.1:89367221:89383427:-
chr16:89493013-89493092:mpeak_506|chr16_89353521_89556969_ANKRD11_NR_-	-	ANKRD11	IPA_up_by_Doxo_in_Poly_at_6h	chr16	89493183	89493233	chr16:89493183-89493233:mpeak_30783|chr16_89353521_89556969_ANKRD11_NR_-mpeak_30783|chr16_89335071_89556969_ANKRD11_NM_-||	22	-	-
chr16:90025619-90025797:mpeak_512|chr16_90015138_90032268_DEF8_NM_+	+	DEF8	IPA_up_by_Doxo_in_Poly_at_6h	chr16	90025648	90025807	chr16:90025648-90025807:mpeak_30861|chr16_90015138_90032268_DEF8_NM_+|	98	+	uc002fpn.2:90015873:90032371:+;uc002fpo.2:90020660:90032371:+;uc002fpp.2:90020660:90032371:+;uc021tmv.1:90020660:90032371:+;uc010vpq.2:90021632:90032371:+;uc010vpr.2:90020660:90032371:+
chr16:9199065-9199171:mpeak_455|chr16_9185536_9210524_C16orf72_NM_+	+	C16orf72	IPA_up_by_Doxo_in_Poly_at_6h	chr16	9199100	9199169	chr16:9199100-9199169:mpeak_28088|chr16_9185536_9210524_C16orf72_NM_+|	81	+	uc002czm.3:9185901:9210769:+
chr16:9199305-9199362:mpeak_456|chr16_9185536_9210524_C16orf72_NM_+	+	C16orf72	IPA_up_by_Doxo_in_Poly_at_6h	chr16	9199100	9199169	chr16:9199100-9199169:mpeak_28088|chr16_9185536_9210524_C16orf72_NM_+|	81	+	uc002czm.3:9185901:9210769:+
chr16:9199606-9199661:mpeak_457|chr16_9185536_9210524_C16orf72_NM_+	+	C16orf72	IPA_up_by_Doxo_in_Poly_at_6h	chr16	9199600	9199661	chr16:9199600-9199661:mpeak_28089|chr16_9185536_9210524_C16orf72_NM_+|	79	+	uc002czm.3:9185901:9210769:+
chr16:9204091-9204235:mpeak_459|chr16_9185536_9210524_C16orf72_NM_+	+	C16orf72	IPA_up_by_Doxo_in_Poly_at_6h	chr16	9204088	9204196	chr16:9204088-9204196:mpeak_28091|chr16_9185536_9210524_C16orf72_NM_+|	82	+	uc002czm.3:9185901:9210769:+
chr16:9205693-9205833:mpeak_460|chr16_9185536_9210524_C16orf72_NM_+	+	C16orf72	IPA_up_by_Doxo_in_Poly_at_6h	chr16	9205693	9205833	chr16:9205693-9205833:mpeak_28093|chr16_9185536_9210524_C16orf72_NM_+|	85	+	uc002czm.3:9185901:9210769:+
chr16:9205693-9205833:mpeak_460|chr16_9185536_9210524_C16orf72_NM_+	+	C16orf72	IPA_up_by_Doxo_in_Poly_at_6h	chr16	9205886	9205965	chr16:9205886-9205965:mpeak_28094|chr16_9185536_9210524_C16orf72_NM_+|	122	+	uc002czm.3:9185901:9210769:+
chr16:9205860-9205996:mpeak_461|chr16_9185536_9210524_C16orf72_NM_+	+	C16orf72	IPA_up_by_Doxo_in_Poly_at_6h	chr16	9205693	9205833	chr16:9205693-9205833:mpeak_28093|chr16_9185536_9210524_C16orf72_NM_+|	85	+	uc002czm.3:9185901:9210769:+
chr16:9205860-9205996:mpeak_461|chr16_9185536_9210524_C16orf72_NM_+	+	C16orf72	IPA_up_by_Doxo_in_Poly_at_6h	chr16	9205886	9205965	chr16:9205886-9205965:mpeak_28094|chr16_9185536_9210524_C16orf72_NM_+|	122	+	uc002czm.3:9185901:9210769:+
chr17:1724437-1724505:mpeak_518|chr17_1684733_1733175_SMYD4_NM_-	-	SMYD4	IPA_up_by_Doxo_in_Poly_at_6h	chr17	1724441	1724505	chr17:1724441-1724505:mpeak_31040|chr17_1684733_1733175_SMYD4_NM_-|	50	-	uc002ftm.4:1684579:1731288:-
chr17:1726246-1726326:mpeak_519|chr17_1684733_1733175_SMYD4_NM_-	-	SMYD4	IPA_up_by_Doxo_in_Poly_at_6h	chr17	1726246	1726321	chr17:1726246-1726321:mpeak_31041|chr17_1684733_1733175_SMYD4_NM_-|	52	-	uc002ftm.4:1684579:1731288:-
chr17:17588310-17588371:mpeak_535|chr17_17584786_17713283_RAI1_NM_+	+	RAI1	IPA_up_by_Doxo_in_Poly_at_6h	chr17	17588310	17588364	chr17:17588310-17588364:mpeak_31861|chr17_17584786_17713283_RAI1_NM_+|	193	+	-
chr17:17657932-17658095:mpeak_536|chr17_17584786_17713283_RAI1_NM_+	+	RAI1	IPA_up_by_Doxo_in_Poly_at_6h	chr17	17657932	17657994	chr17:17657932-17657994:mpeak_31865|chr17_17584786_17713283_RAI1_NM_+|	191	+	-
chr17:2295717-2295858:mpeak_521|chr17_2290943_2304258_MNT_NM_-	-	MNT	IPA_up_by_Doxo_in_Poly_at_6h	chr17	2295796	2295858	chr17:2295796-2295858:mpeak_31108|chr17_2290943_2304258_MNT_NM_-|	23	-	uc002fur.3:2290194:2304006:-
chr17:37487526-37487584:mpeak_549|chr17_37417820_37557909_FBXL20_NM_-	-	FBXL20	IPA_up_by_Doxo_in_Poly_at_6h	chr17	37487526	37487576	chr17:37487526-37487576:mpeak_32750|chr17_37417820_37557909_FBXL20_NM_-|	21	-	uc002hrt.3:37417712:37557655:-;uc010cvu.3:37417712:37557655:-
chr17:38289291-38289345:mpeak_551|chr17_38278789_38290531_MSL1_NM_+	+	MSL1	IPA_up_by_Doxo_in_Poly_at_6h	chr17	38289291	38289345	chr17:38289291-38289345:mpeak_32818|chr17_38278789_38290531_MSL1_NM_+|	116	+	uc002hua.4:38282456:38290622:+;uc002hub.3:38279468:38290622:+;uc002hud.3:38287797:38290622:+
chr17:46928441-46928549:mpeak_555|chr17_46908349_46940199_CALCOCO2_NM_+	+	CALCOCO2	IPA_up_by_Doxo_in_Poly_at_6h	chr17	46928439	46928542	chr17:46928439-46928542:mpeak_33405|chr17_46908349_46940199_CALCOCO2_NM_+|	89	+	uc010wlq.3:46925461:46940367:+;uc010wlp.3:46919069:46940367:+;uc010wlr.3:46919069:46940367:+;uc002iof.4:46919069:46940367:+;uc010wls.3:46919069:46940367:+
chr17:48777924-48778071:mpeak_558|chr17_48773504_48785270_ANKRD40_NM_-	-	ANKRD40	IPA_up_by_Doxo_in_Poly_at_6h	chr17	48777926	48778057	chr17:48777926-48778057:mpeak_33532|chr17_48773504_48785270_ANKRD40_NM_-|	41	-	uc002iso.3:48773357:48785015:-
chr17:73037935-73038028:mpeak_580|chr17_73028661_73059112_KCTD2_NR_+	+	KCTD2	IPA_up_by_Doxo_in_Poly_at_6h	chr17	73037978	73038028	chr17:73037978-73038028:mpeak_34691|chr17_73028661_73059112_KCTD2_NR_+|	103	+	-
chr17:77753486-77753547:mpeak_586|chr17_77751976_77757530_CBX2_NM_+	+	CBX2	IPA_up_by_Doxo_in_Poly_at_18h	chr17	77753487	77753541	chr17:77753487-77753541:mpeak_38054|chr17_77751976_77757530_CBX2_NM_+|	110.66	+	uc002jxb.2:77752034:77755948:+;uc002jxc.3:77752034:77758841:+
chr17:77753486-77753547:mpeak_586|chr17_77751976_77757530_CBX2_NM_+	+	CBX2	IPA_up_by_Doxo_in_Poly_at_6h	chr17	77753487	77753541	chr17:77753487-77753541:mpeak_35001|chr17_77751976_77757530_CBX2_NM_+|	179	+	uc002jxb.2:77752034:77755948:+;uc002jxc.3:77752034:77758841:+
chr17:80530501-80530568:mpeak_591|chr17_80477593_80559178_FOXK2_NM_+	+	FOXK2	IPA_up_by_Doxo_in_Poly_at_6h	chr17	80530493	80530571	chr17:80530493-80530571:mpeak_35279|chr17_80477593_80559178_FOXK2_NM_+|	118	+	uc002kfm.1:80477764:80553716:+;uc002kfn.3:80477764:80559375:+;uc010diu.3:80477764:80559280:+
chr17:80545303-80545393:mpeak_592|chr17_80477593_80559178_FOXK2_NM_+	+	FOXK2	IPA_up_by_Doxo_in_Poly_at_6h	chr17	80545337	80545393	chr17:80545337-80545393:mpeak_35281|chr17_80477593_80559178_FOXK2_NM_+|	111	+	uc002kfm.1:80477764:80553716:+;uc002kfn.3:80477764:80559375:+;uc010diu.3:80477764:80559280:+
chr18:13543476-13543627:mpeak_598|chr18_13218728_13645125_LDLRAD4_NM_+	+	LDLRAD4	IPA_up_by_Doxo_in_Poly_at_6h	chr18	13543566	13543633	chr18:13543566-13543633:mpeak_35619|chr18_13218728_13645125_LDLRAD4_NM_+|	34	+	uc002ksb.3:13387721:13645656:+;uc031rhm.1:13387721:13645656:+;uc031rhn.1:13387721:13645656:+
chr18:2582794-2582866:mpeak_594|chr18_2571509_2616435_NDC80_NM_+	+	NDC80	IPA_up_by_Doxo_in_Poly_at_6h	chr18	2582794	2582852	chr18:2582794-2582852:mpeak_35381|chr18_2571509_2616435_NDC80_NM_+|	13	+	uc002kli.3:2572984:2616573:+
chr18:32409232-32409303:mpeak_605|chr18_32073253_32467729_DTNA_NM_+	+	DTNA	IPA_up_by_Doxo_in_Poly_at_6h	chr18	32409234	32409296	chr18:32409234-32409296:mpeak_35917|chr18_32073253_32467729_DTNA_NM_+|	85	+	uc010xby.1:32398168:32464709:+;uc021uiq.1:32398168:32438360:+;uc021uir.1:32398168:32438360:+;uc002kyd.4:32400832:32446125:+;uc010dmo.3:32400832:32443991:+;uc010xbz.2:32400832:32464709:+;uc002kye.3:32400832:32464709:+;uc010xca.2:32400832:32464709:+;uc010xbx.2:32335940:32446125:+;uc002kxv.4:32335940:32446125:+;uc002kxw.2:32335940:32464709:+;uc002kxz.2:32335940:32464709:+;uc002kxy.2:32335940:3246470…
chr18:45379619-45379825:mpeak_606|chr18_45368321_45457517_SMAD2_NM_-	-	SMAD2	IPA_up_by_Doxo_in_Poly_at_18h	chr18	45379621	45379816	chr18:45379621-45379816:mpeak_39364|chr18_45368321_45457517_SMAD2_NM_-|	57.33	-	uc002lcy.4:45368197:45423127:-;uc002lcz.4:45368197:45423127:-;uc010xdc.3:45368197:45423127:-;uc010xdd.2:45371604:45423127:-
chr18:45379619-45379825:mpeak_606|chr18_45368321_45457517_SMAD2_NM_-	-	SMAD2	IPA_up_by_Doxo_in_Poly_at_6h	chr18	45379618	45379823	chr18:45379618-45379823:mpeak_36119|chr18_45368321_45457517_SMAD2_NM_-|	71	-	uc002lcy.4:45368197:45423127:-;uc002lcz.4:45368197:45423127:-;uc010xdc.3:45368197:45423127:-;uc010xdd.2:45371604:45423127:-
chr18:55712643-55712733:mpeak_608|chr18_55711609_56063398_NEDD4L_NM_+	+	NEDD4L	IPA_up_by_Doxo_in_Poly_at_6h	chr18	55712646	55712730	chr18:55712646-55712730:mpeak_36291|chr18_55711609_56063398_NEDD4L_NM_+|	32	+	uc002lgy.3:55711892:56063501:+;uc002lgz.3:55711892:56063501:+;uc002lgx.3:55711892:56063501:+
chr19:15303753-15303813:mpeak_627|chr19_15272525_15311792_NOTCH3_NM_-	-	NOTCH3	IPA_up_by_Doxo_in_Poly_at_6h	chr19	15303756	15303813	chr19:15303756-15303813:mpeak_37645|chr19_15272525_15311792_NOTCH3_NM_-|	100	-	uc002nan.3:15271472:15311716:-;uc002nao.1:15288337:15311716:-
chr19:16942831-16942881:mpeak_629|chr19_16940197_16989307_SIN3B_NM_+	+	SIN3B	IPA_up_by_Doxo_in_Poly_at_6h	chr19	16942829	16942888	chr19:16942829-16942888:mpeak_37750|chr19_16940197_16989307_SIN3B_NM_+|	70	+	uc002new.3:16940231:16965076:+;uc002ney.2:16940231:16989538:+;uc002nez.2:16940231:16989538:+
chr19:16965125-16965410:mpeak_630|chr19_16940197_16989307_SIN3B_NM_+	+	SIN3B	IPA_up_by_Doxo_in_Poly_at_6h	chr19	16965124	16965393	chr19:16965124-16965393:mpeak_37753|chr19_16940197_16989307_SIN3B_NM_+|	86	+	uc002ney.2:16940231:16989538:+;uc002nez.2:16940231:16989538:+
chr19:16965589-16965944:mpeak_631|chr19_16940197_16989307_SIN3B_NM_+	+	SIN3B	IPA_up_by_Doxo_in_Poly_at_6h	chr19	16965589	16965868	chr19:16965589-16965868:mpeak_37754|chr19_16940197_16989307_SIN3B_NM_+|	134	+	uc002ney.2:16940231:16989538:+;uc002nez.2:16940231:16989538:+
chr19:16967847-16967919:mpeak_633|chr19_16940197_16989307_SIN3B_NM_+	+	SIN3B	IPA_up_by_Doxo_in_Poly_at_6h	chr19	16967857	16967972	chr19:16967857-16967972:mpeak_37757|chr19_16940197_16989307_SIN3B_NM_+|	77	+	uc002ney.2:16940231:16989538:+;uc002nez.2:16940231:16989538:+
chr19:24104266-24104347:mpeak_648|chr19_24097683_24115144_ZNF726_NM_+	+	ZNF726	IPA_up_by_Doxo_in_Poly_at_6h	chr19	24104291	24104347	chr19:24104291-24104347:mpeak_38117|chr19_24097683_24115144_ZNF726_NM_+|	8	+	uc021urw.1:24097796:24116769:+
chr19:24106698-24106823:mpeak_649|chr19_24097683_24115144_ZNF726_NM_+	+	ZNF726	IPA_up_by_Doxo_in_Poly_at_6h	chr19	24106698	24106809	chr19:24106698-24106809:mpeak_38118|chr19_24097683_24115144_ZNF726_NM_+|	5	+	uc021urw.1:24097796:24116769:+
chr19:24112032-24112092:mpeak_651|chr19_24097683_24115144_ZNF726_NM_+	+	ZNF726	IPA_up_by_Doxo_in_Poly_at_6h	chr19	24112032	24112149	chr19:24112032-24112149:mpeak_38120|chr19_24097683_24115144_ZNF726_NM_+|	23	+	uc021urw.1:24097796:24116769:+
chr19:24113449-24113507:mpeak_652|chr19_24097683_24115144_ZNF726_NM_+	+	ZNF726	IPA_up_by_Doxo_in_Poly_at_6h	chr19	24113457	24113509	chr19:24113457-24113509:mpeak_38121|chr19_24097683_24115144_ZNF726_NM_+|	4	+	uc021urw.1:24097796:24116769:+
chr19:337217-337319:mpeak_612|chr19_306711_344791_MIER2_NM_-	-	MIER2	IPA_up_by_Doxo_in_Poly_at_18h	chr19	337236	337319	chr19:337236-337319:mpeak_39857|chr19_306711_344791_MIER2_NM_-|	13.26	-	uc002lok.1:306689:344782:-
chr19:337217-337319:mpeak_612|chr19_306711_344791_MIER2_NM_-	-	MIER2	IPA_up_by_Doxo_in_Poly_at_6h	chr19	337236	337319	chr19:337236-337319:mpeak_36532|chr19_306711_344791_MIER2_NM_-|	22	-	uc002lok.1:306689:344782:-
chr19:36584227-36584289:mpeak_659|chr19_36545782_36595669_WDR62_NM_+	+	WDR62	IPA_up_by_Doxo_in_Poly_at_6h	chr19	36584229	36584286	chr19:36584229-36584286:mpeak_38411|chr19_36545782_36595669_WDR62_NM_+|	30	+	uc002odd.2:36545873:36595930:+;uc002odc.2:36545873:36595930:+
chr19:46293932-46294050:mpeak_674|chr19_46287548_46296060_DMWD_NM_-	-	DMWD	IPA_up_by_Doxo_in_Poly_at_6h	chr19	46293932	46293995	chr19:46293932-46293995:mpeak_39023|chr19_46287548_46296060_DMWD_NM_-|	51	-	uc002pdj.1:46287500:46296014:-
chr19:55591335-55591397:mpeak_691|chr19_55587220_55598895_EPS8L1_NM_+	+	EPS8L1	IPA_up_by_Doxo_in_Poly_at_6h	chr19	55591336	55591394	chr19:55591336-55591394:mpeak_39725|chr19_55587220_55598895_EPS8L1_NM_+|	155	+	uc010yfr.2:55591132:55598982:+;uc010ess.1:55583565:55597560:+;uc010est.1:55587812:55595150:+;uc002qis.4:55587812:55598982:+
chr19:5562640-5562730:mpeak_617|chr19_5561410_5568045_TINCR_NR_-	-	TINCR	IPA_up_by_Doxo_in_Poly_at_18h	chr19	5562641	5562715	chr19:5562641-5562715:mpeak_40265|chr19_5561410_5568045_TINCR_NR_-|	7.41	-	-
chr1:9634727-9634886:mpeak_7|chr1_9599527_9642356_SLC25A33_NM_+	+	SLC25A33	IPA_up_by_Doxo_in_Poly_at_18h	chr1	9634797	9634885	chr1:9634797-9634885:mpeak_424|chr1_9599527_9642356_SLC25A33_NM_+|	32.31	+	uc001apw.3:9599750:9642559:+
chr1:9634727-9634886:mpeak_7|chr1_9599527_9642356_SLC25A33_NM_+	+	SLC25A33	IPA_up_by_Doxo_in_Poly_at_6h	chr1	9634797	9634886	chr1:9634797-9634886:mpeak_389|chr1_9599527_9642356_SLC25A33_NM_+|	36	+	uc001apw.3:9599750:9642559:+
chr20:30960299-30960363:mpeak_783|chr20_30946146_31022234_ASXL1_NM_+	+	ASXL1	IPA_up_by_Doxo_in_Poly_at_6h	chr20	30960296	30960359	chr20:30960296-30960359:mpeak_46653|chr20_30946146_31022234_ASXL1_NM_+|	27	+	uc002wxs.3:30946578:31025141:+;uc021wbw.1:30946578:31025141:+;uc010geb.3:30956848:31025141:+
chr20:43375791-43375848:mpeak_789|chr20_43374487_43378769_KCNK15_NM_+	+	KCNK15	IPA_up_by_Doxo_in_Poly_at_6h	chr20	43375790	43375847	chr20:43375790-43375847:mpeak_47116|chr20_43374487_43378769_KCNK15_NM_+|	60	+	uc002xmr.3:43374551:43379479:+
chr20:47539090-47539148:mpeak_795|chr20_47538274_47649559_ARFGEF2_NM_+	+	ARFGEF2	IPA_up_by_Doxo_in_Poly_at_6h	chr20	47539090	47539142	chr20:47539090-47539142:mpeak_47379|chr20_47538274_47649559_ARFGEF2_NM_+|	62	+	uc002xtx.4:47538426:47649736:+
chr20:52197992-52198050:mpeak_796|chr20_52185803_52199636_ZNF217_NM_-	-	ZNF217	IPA_up_by_Doxo_in_Poly_at_6h	chr20	52197992	52198128	chr20:52197992-52198128:mpeak_47617|chr20_52185803_52199636_ZNF217_NM_-|	192	-	uc002xwq.4:52188282:52199365:-;uc010gij.1:52192266:52199341:-
chr20:61559972-61560087:mpeak_799|chr20_61513766_61569304_DIDO1_NM_-	-	DIDO1	IPA_up_by_Doxo_in_Poly_at_6h	chr20	61559970	61560031	chr20:61559970-61560031:mpeak_47972|chr20_61513766_61569304_DIDO1_NM_-|	44	-	-
chr2:136268281-136268345:mpeak_738|chr2_135958010_136288806_ZRANB3_NM_-	-	ZRANB3	IPA_up_by_Doxo_in_Poly_at_6h	chr2	136268281	136268345	chr2:136268281-136268345:mpeak_43436|chr2_135958010_136288806_ZRANB3_NM_-|	37	-	-
chr21:37728913-37728978:mpeak_807|chr21_37692486_37747440_MORC3_NM_+	+	MORC3	IPA_up_by_Doxo_in_Poly_at_18h	chr21	37728913	37728975	chr21:37728913-37728975:mpeak_53108|chr21_37692486_37747440_MORC3_NM_+|	14.11	+	uc002yvi.3:37692562:37747594:+
chr21:40186843-40186912:mpeak_808|chr21_40177230_40194597_ETS2_NM_+	+	ETS2	IPA_up_by_Doxo_in_Poly_at_6h	chr21	40186843	40186911	chr21:40186843-40186911:mpeak_48569|chr21_40177230_40194597_ETS2_NM_+|	90	+	uc002yxf.3:40177270:40194813:+;uc002yxg.4:40181958:40194813:+
chr21:45462401-45462459:mpeak_817|chr21_45432205_45523173_TRAPPC10_NM_+	+	TRAPPC10	IPA_up_by_Doxo_in_Poly_at_6h	chr21	45462399	45462525	chr21:45462399-45462525:mpeak_48837|chr21_45432205_45523173_TRAPPC10_NM_+|	70	+	uc002zdz.3:45432374:45479386:+;uc002zea.3:45432374:45523412:+
chr2:159948258-159948317:mpeak_741|chr2_159825145_160086088_TANC1_NM_+	+	TANC1	IPA_up_by_Doxo_in_Poly_at_18h	chr2	159948264	159948316	chr2:159948264-159948316:mpeak_47905|chr2_159825145_160086088_TANC1_NM_+|	30.28	+	uc010fol.1:159922422:160035672:+;uc010fom.1:159922422:160084476:+;uc010zcm.2:159922422:160086129:+;uc002uag.3:159922422:160087523:+
chr2:159948258-159948317:mpeak_741|chr2_159825145_160086088_TANC1_NM_+	+	TANC1	IPA_up_by_Doxo_in_Poly_at_6h	chr2	159948264	159948315	chr2:159948264-159948315:mpeak_43771|chr2_159825145_160086088_TANC1_NM_+|	47	+	uc010fol.1:159922422:160035672:+;uc010fom.1:159922422:160084476:+;uc010zcm.2:159922422:160086129:+;uc002uag.3:159922422:160087523:+
chr2:160317434-160317567:mpeak_745|chr2_160176929_160473112_BAZ2B_NM_-	-	BAZ2B	IPA_up_by_Doxo_in_Poly_at_6h	chr2	160317432	160317497	chr2:160317432-160317497:mpeak_43797|chr2_160176929_160473112_BAZ2B_NM_-|	16	-	uc010fop.1:160294813:160335230:-;uc002uat.4:160295513:160335230:-;uc002uas.1:160289268:160335230:-;uc002uao.3:160176775:160335230:-;uc002uap.3:160176775:160335230:-;uc002uau.1:160294774:160335230:-
chr2:171906568-171906699:mpeak_747|chr2_171850466_172087824_TLK1_NM_-	-	TLK1	IPA_up_by_Doxo_in_Poly_at_6h	chr2	171906579	171906699	chr2:171906579-171906699:mpeak_44022|chr2_171850466_172087824_TLK1_NM_-|	18	-	uc002ugr.1:171902679:171910351:-;uc010zdn.1:171850289:171923393:-;uc002ugn.2:171850289:172016938:-;uc002ugo.2:171850289:172016938:-;uc002ugp.2:171850289:171974362:-
chr2:175260911-175261006:mpeak_752|chr2_175260456_175292440_SCRN3_NM_+	+	SCRN3	IPA_up_by_Doxo_in_Poly_at_6h	chr2	175260952	175261003	chr2:175260952-175261003:mpeak_44158|chr2_175260456_175292440_SCRN3_NM_+|	9	+	uc010zen.2:175260484:175292623:+
chr2:201253939-201254013:mpeak_754|chr2_201170603_201342358_SPATS2L_NM_+	+	SPATS2L	IPA_up_by_Doxo_in_Poly_at_6h	chr2	201253941	201254009	chr2:201253941-201254009:mpeak_44700|chr2_201170603_201342358_SPATS2L_NM_+|	28	+	uc002uvn.4:201253967:201342754:+;uc010fst.3:201253967:201342754:+;uc002uvp.4:201253967:201342754:+;uc002uvq.4:201253967:201342754:+;uc002uvr.4:201253967:201342754:+;uc010zhc.2:201173795:201342754:+
chr22:29447378-29447443:mpeak_830|chr22_29279754_29449566_ZNRF3_NM_+	+	ZNRF3	IPA_up_by_Doxo_in_Poly_at_6h	chr22	29447381	29447446	chr22:29447381-29447446:mpeak_49580|chr22_29279754_29449566_ZNRF3_NM_+mpeak_49580|chr22_29279754_29449566_ZNRF3_NM_+||	50	+	uc021wnq.1:29383063:29449610:+;uc003aeg.3:29279754:29449610:+
chr22:31335637-31335699:mpeak_831|chr22_31322858_31364483_MORC2_NM_-	-	MORC2	IPA_up_by_Doxo_in_Poly_at_6h	chr22	31335637	31335698	chr22:31335637-31335698:mpeak_49696|chr22_31322858_31364483_MORC2_NM_-|	174	-	uc003aje.1:31322789:31346402:-
chr2:235861783-235861881:mpeak_768|chr2_235860627_235962235_SH3BP4_NM_+	+	SH3BP4	IPA_up_by_Doxo_in_Poly_at_6h	chr2	235861783	235861912	chr2:235861783-235861912:mpeak_45694|chr2_235860627_235962235_SH3BP4_NM_+|	59	+	-
chr22:36234589-36234746:mpeak_836|chr22_36140296_36424585_RBFOX2_NM_-	-	RBFOX2	IPA_up_by_Doxo_in_Poly_at_6h	chr22	36234449	36234746	chr22:36234449-36234746:mpeak_49837|chr22_36140296_36424585_RBFOX2_NM_-|	100	-	uc003aol.4:36140251:36236265:-;uc003aoj.4:36140251:36236265:-;uc003aok.4:36140241:36236265:-;uc003aoh.4:36140241:36236265:-;uc003aom.4:36140251:36236265:-;uc003aon.4:36140251:36424473:-;uc003aoo.4:36140251:36424473:-
chr2:97527896-97528074:mpeak_726|chr2_97527192_97535735_SEMA4C_NM_-	-	SEMA4C	IPA_up_by_Doxo_in_Poly_at_6h	chr2	97527939	97528074	chr2:97527939-97528074:mpeak_42514|chr2_97527192_97535735_SEMA4C_NM_-|	84	-	uc002sxg.4:97526362:97532436:-;uc002sxh.4:97526362:97533623:-
chr3:140955171-140955338:mpeak_898|chr3_140950666_141011109_PXYLP1_NM_+	+	PXYLP1	IPA_up_by_Doxo_in_Poly_at_18h	chr3	140955176	140955227	chr3:140955176-140955227:mpeak_59016|chr3_140950666_141011109_PXYLP1_NM_+|	5.33	+	-
chr3:140955171-140955338:mpeak_898|chr3_140950666_141011109_PXYLP1_NM_+	+	PXYLP1	IPA_up_by_Doxo_in_Poly_at_6h	chr3	140955176	140955227	chr3:140955176-140955227:mpeak_53839|chr3_140950666_141011109_PXYLP1_NM_+|	12	+	-
chr3:169201259-169201803:mpeak_905|chr3_168802831_169381563_MECOM_NM_-	-	MECOM	IPA_up_by_Doxo_in_Poly_at_18h	chr3	169201316	169201763	chr3:169201316-169201763:mpeak_59694|chr3_168802831_169381563_MECOM_NM_-|	1160.92	-	uc011bpl.1:168867408:169381160:-;uc011bpj.1:168802696:169381160:-;uc010hwn.2:168819849:169381160:-
chr3:195966418-195966624:mpeak_917|chr3_195965765_196014584_PCYT1A_NM_-	-	PCYT1A	IPA_up_by_Doxo_in_Poly_at_6h	chr3	195966565	195966622	chr3:195966565-195966622:mpeak_55165|chr3_195965765_196014584_PCYT1A_NM_-|	75	-	uc003fwg.3:195965558:195997402:-;uc003fwh.3:195965558:195997402:-
chr3:195997283-195997425:mpeak_918|chr3_195965765_196014584_PCYT1A_NM_-	-	PCYT1A	IPA_up_by_Doxo_in_Poly_at_6h	chr3	195997324	195997422	chr3:195997324-195997422:mpeak_55169|chr3_195965765_196014584_PCYT1A_NM_-|	36	-	uc003fwg.3:195965558:195997402:-;uc003fwh.3:195965558:195997402:-
chr3:196014396-196014538:mpeak_919|chr3_195965765_196014584_PCYT1A_NM_-	-	PCYT1A	IPA_up_by_Doxo_in_Poly_at_6h	chr3	196014396	196014538	chr3:196014396-196014538:mpeak_55170|chr3_195965765_196014584_PCYT1A_NM_-|	40	-	-
chr3:196120416-196120471:mpeak_921|chr3_196083717_196159345_UBXN7_NM_-	-	UBXN7	IPA_up_by_Doxo_in_Poly_at_6h	chr3	196120416	196120471	chr3:196120416-196120471:mpeak_55185|chr3_196083717_196159345_UBXN7_NM_-|	64	-	uc003fwm.4:196083555:196159270:-
chr3:27493911-27494042:mpeak_861|chr3_27418336_27525911_SLC4A7_NM_-	-	SLC4A7	IPA_up_by_Doxo_in_Poly_at_18h	chr3	27493900	27493983	chr3:27493900-27493983:mpeak_56027|chr3_27418336_27525911_SLC4A7_NM_-|	130.56	-	uc003cdv.4:27418254:27498174:-;uc003cdw.4:27418254:27498174:-;uc011axb.3:27418254:27525617:-;uc011aww.3:27418254:27525617:-;uc011awx.3:27418254:27525617:-;uc021wun.2:27418254:27525617:-;uc003cdu.5:27418254:27525617:-;uc011axa.3:27418254:27525617:-;uc011awy.3:27418254:27525617:-;uc010hfm.3:27465482:27525617:-
chr3:37317160-37317528:mpeak_867|chr3_37284681_37407570_GOLGA4_NM_+	+	GOLGA4	IPA_up_by_Doxo_in_Poly_at_6h	chr3	37317343	37317528	chr3:37317343-37317528:mpeak_51406|chr3_37284681_37407570_GOLGA4_NM_+|	68	+	uc003cgu.2:37285041:37330782:+;uc010hgr.2:37285041:37369314:+;uc003cgv.3:37285041:37402763:+;uc003cgw.3:37285041:37407594:+;uc010hgs.3:37285041:37407594:+
chr3:37317160-37317528:mpeak_867|chr3_37284681_37407570_GOLGA4_NM_+	+	GOLGA4	IPA_up_by_Doxo_in_Poly_at_6h	chr3	37317629	37317987	chr3:37317629-37317987:mpeak_51407|chr3_37284681_37407570_GOLGA4_NM_+|	270	+	uc003cgu.2:37285041:37330782:+;uc010hgr.2:37285041:37369314:+;uc003cgv.3:37285041:37402763:+;uc003cgw.3:37285041:37407594:+;uc010hgs.3:37285041:37407594:+
chr3:63897802-63897863:mpeak_881|chr3_63850232_63985125_ATXN7_NM_+	+	ATXN7	IPA_up_by_Doxo_in_Poly_at_6h	chr3	63897811	63897863	chr3:63897811-63897863:mpeak_52329|chr3_63850232_63985125_ATXN7_NM_+|	39	+	-
chr4:13627154-13627321:mpeak_930|chr4_13571752_13629328_BOD1L1_NM_-	-	BOD1L1	IPA_up_by_Doxo_in_Poly_at_6h	chr4	13627157	13627317	chr4:13627157-13627317:mpeak_55853|chr4_13571752_13629328_BOD1L1_NM_-|	16	-	uc003gmz.1:13571634:13629211:-
chr4:40870974-40871114:mpeak_935|chr4_40818276_41216635_APBB2_NM_-	-	APBB2	IPA_up_by_Doxo_in_Poly_at_6h	chr4	40870981	40871114	chr4:40870981-40871114:mpeak_56293|chr4_40818276_41216635_APBB2_NM_-|	74	-	uc010ifu.3:40818108:40895395:-;uc003gvl.3:40818108:41035271:-;uc003gvn.3:40818108:41035271:-;uc003gvm.3:40818108:41035271:-
chr4:7050722-7050806:mpeak_929|chr4_7045155_7055788_TADA2B_NM_+	+	TADA2B	IPA_up_by_Doxo_in_Poly_at_6h	chr4	7050744	7050802	chr4:7050744-7050802:mpeak_55751|chr4_7045155_7055788_TADA2B_NM_+|	55	+	uc003gjw.4:7045306:7056781:+;uc010idi.3:7045306:7056781:+
chr4:95921602-95921682:mpeak_944|chr4_95679127_96075698_BMPR1B_NM_+	+	BMPR1B	IPA_up_by_Doxo_in_Poly_at_18h	chr4	95921604	95921682	chr4:95921604-95921682:mpeak_62746|chr4_95679127_96075698_BMPR1B_NM_+|	47.56	+	-
chr4:95921602-95921682:mpeak_944|chr4_95679127_96075698_BMPR1B_NM_+	+	BMPR1B	IPA_up_by_Doxo_in_Poly_at_6h	chr4	95921604	95921682	chr4:95921604-95921682:mpeak_57175|chr4_95679127_96075698_BMPR1B_NM_+|	82	+	-
chr4:95986868-95987088:mpeak_945|chr4_95679127_96075698_BMPR1B_NM_+	+	BMPR1B	IPA_up_by_Doxo_in_Poly_at_6h	chr4	95986962	95987029	chr4:95986962-95987029:mpeak_57176|chr4_95679127_96075698_BMPR1B_NM_+|	73	+	uc031sgn.1:95972850:96075824:+
chr5:145609308-145609478:mpeak_1002|chr5_145583162_145665509_RBM27_NM_+	+	RBM27	IPA_up_by_Doxo_in_Poly_at_6h	chr5	145609289	145609482	chr5:145609289-145609482:mpeak_61982|chr5_145583162_145665509_RBM27_NM_+|	34	+	uc003lny.2:145583328:145649147:+;uc003lnz.4:145583328:145665593:+
chr5:176675218-176675331:mpeak_1017|chr5_176560079_176720832_NSD1_NM_+	+	NSD1	IPA_up_by_Doxo_in_Poly_at_6h	chr5	176675218	176675331	chr5:176675218-176675331:mpeak_62639|chr5_176560079_176720832_NSD1_NM_+|	40	+	uc003mft.4:176562171:176722460:+;uc003mfr.4:176562104:176722460:+;uc003mfs.1:176562104:176707835:+;uc011dfx.2:176619013:176722460:+
chr5:41904833-41904969:mpeak_969|chr5_41904469_41917117_C5orf51_NM_+	+	C5orf51	IPA_up_by_Doxo_in_Poly_at_6h	chr5	41904836	41904912	chr5:41904836-41904912:mpeak_59381|chr5_41904469_41917117_C5orf51_NM_+|	17	+	uc003jmo.3:41904469:41917401:+
chr5:66226731-66226801:mpeak_976|chr5_65892175_66458974_MAST4_NM_+	+	MAST4	IPA_up_by_Doxo_in_Poly_at_6h	chr5	66226731	66226792	chr5:66226731-66226792:mpeak_59776|chr5_65892175_66458974_MAST4_NM_+|	60	+	uc003jus.3:66124671:66410076:+;uc003jut.2:66124671:66462879:+;uc010iwz.3:65892483:66282314:+;uc003jur.4:65892483:66282314:+;uc021xzk.1:65892483:66462879:+
chr5:70358521-70358636:mpeak_979|chr5_70331623_70363497_GTF2H2_NM_-	-	GTF2H2	IPA_up_by_Doxo_in_Poly_at_6h	chr5	70358521	70358634	chr5:70358521-70358634:mpeak_59915|chr5_70331623_70363497_GTF2H2_NM_-|	28	-	uc003kav.4:70331503:70358590:-;uc003kau.4:70331503:70358590:-;uc003kay.1:70351150:70358590:-;uc003kat.1:70265930:70406597:-
chr5:70363308-70363525:mpeak_980|chr5_70331623_70363497_GTF2H2_NM_-	-	GTF2H2	IPA_up_by_Doxo_in_Poly_at_6h	chr5	70363311	70363525	chr5:70363311-70363525:mpeak_59916|chr5_70331623_70363497_GTF2H2_NM_-|	31	-	uc003kat.1:70265930:70406597:-
chr5:72332956-72333016:mpeak_981|chr5_72251807_72383894_FCHO2_NM_+	+	FCHO2	IPA_up_by_Doxo_in_Poly_at_6h	chr5	72332966	72333016	chr5:72332966-72333016:mpeak_59985|chr5_72251807_72383894_FCHO2_NM_+|	7	+	uc011csk.1:72251923:72333826:+;uc003kcl.3:72251923:72383917:+;uc011csl.2:72251923:72383917:+
chr6:12015774-12015912:mpeak_1027|chr6_12012723_12163515_HIVEP1_NM_+	+	HIVEP1	IPA_up_by_Doxo_in_Poly_at_6h	chr6	12015778	12015912	chr6:12015778-12015912:mpeak_63256|chr6_12012723_12163515_HIVEP1_NM_+|	17	+	uc003nac.3:12015861:12164694:+
chr6:144854274-144854405:mpeak_1074|chr6_144612872_145172124_UTRN_NM_+	+	UTRN	IPA_up_by_Doxo_in_Poly_at_6h	chr6	144854274	144854399	chr6:144854274-144854399:mpeak_66308|chr6_144612872_145172124_UTRN_NM_+|	16	+	uc003qkt.3:144612964:145172133:+
chr6:152201702-152201914:mpeak_1081|chr6_152011630_152419866_ESR1_NM_+	+	ESR1	IPA_up_by_Doxo_in_Poly_at_6h	chr6	152201779	152201914	chr6:152201779-152201914:mpeak_66552|chr6_152011630_152419866_ESR1_NM_+|	444	+	uc003qom.4:152129047:152420101:+;uc010kin.3:152129047:152420101:+;uc010kio.3:152129047:152420101:+;uc010kip.3:152129047:152420101:+;uc003qon.4:152129047:152420101:+;uc010kir.3:152129047:152420101:+;uc003qoo.4:152129047:152420101:+;uc010kiq.3:152201877:152420101:+;uc011eev.2:152163798:152420101:+;uc011eew.2:152163784:152419869:+;uc010kis.3:152163798:152417823:+;uc021zha.1:152163868:152420101:+;uc0…
chr6:53787065-53787148:mpeak_1041|chr6_53659777_53787432_LRRC1_NM_+	+	LRRC1	IPA_up_by_Doxo_in_Poly_at_6h	chr6	53787093	53787150	chr6:53787093-53787150:mpeak_64830|chr6_53659777_53787432_LRRC1_NM_+|	69	+	uc003pcd.1:53660054:53787591:+
chr6:88408120-88408260:mpeak_1054|chr6_88385325_88411985_AKIRIN2_NM_-	-	AKIRIN2	IPA_up_by_Doxo_in_Poly_at_6h	chr6	88408120	88408260	chr6:88408120-88408260:mpeak_65301|chr6_88385325_88411985_AKIRIN2_NM_-|	60	-	uc003pmk.3:88385314:88411402:-
chr7:105515533-105515595:mpeak_1130|chr7_105248340_105517031_ATXN7L1_NM_-	-	ATXN7L1	IPA_up_by_Doxo_in_Poly_at_6h	chr7	105515536	105515592	chr7:105515536-105515592:mpeak_69466|chr7_105248340_105517031_ATXN7L1_NM_-|	5	-	uc003vde.2:105248298:105517004:-;uc003vdi.2:105401823:105517004:-
chr7:129274437-129274492:mpeak_1134|chr7_129251542_129394857_NRF1_NM_+	+	NRF1	IPA_up_by_Doxo_in_Poly_at_6h	chr7	129274437	129274492	chr7:129274437-129274492:mpeak_69868|chr7_129251542_129394857_NRF1_NM_+mpeak_69868|chr7_129251542_129394857_NRF1_NM_+||	16	+	-
chr7:150820668-150820730:mpeak_1147|chr7_150782917_150840823_AGAP3_NM_+	+	AGAP3	IPA_up_by_Doxo_in_Poly_at_6h	chr7	150820668	150820730	chr7:150820668-150820730:mpeak_70452|chr7_150782917_150840823_AGAP3_NM_+|	204	+	uc003wje.1:150814842:150841030:+;uc003wjg.1:150783828:150841030:+
chr7:42261207-42261281:mpeak_1103|chr7_42006239_42276618_GLI3_NM_-	-	GLI3	IPA_up_by_Doxo_in_Poly_at_18h	chr7	42261211	42261280	chr7:42261211-42261280:mpeak_74884|chr7_42006239_42276618_GLI3_NM_-|	16.03	-	uc011kbh.2:42003927:42262852:-
chr7:42261207-42261281:mpeak_1103|chr7_42006239_42276618_GLI3_NM_-	-	GLI3	IPA_up_by_Doxo_in_Poly_at_6h	chr7	42261211	42261280	chr7:42261211-42261280:mpeak_67990|chr7_42006239_42276618_GLI3_NM_-|	23	-	uc011kbh.2:42003927:42262852:-
chr7:5028684-5028820:mpeak_1092|chr7_5013615_5036240_RNF216P1_NR_+	+	RNF216P1	IPA_up_by_Doxo_in_Poly_at_6h	chr7	5028684	5028815	chr7:5028684-5028815:mpeak_67205|chr7_5013615_5036240_RNF216P1_NR_+|	39	+	-
chr7:5028946-5029003:mpeak_1093|chr7_5013615_5036240_RNF216P1_NR_+	+	RNF216P1	IPA_up_by_Doxo_in_Poly_at_6h	chr7	5028684	5028815	chr7:5028684-5028815:mpeak_67205|chr7_5013615_5036240_RNF216P1_NR_+|	39	+	-
chr7:64259829-64259900:mpeak_1108|chr7_64254765_64291828_ZNF138_NM_+	+	ZNF138	IPA_up_by_Doxo_in_Poly_at_6h	chr7	64259832	64259886	chr7:64259832-64259886:mpeak_68333|chr7_64254765_64312176_ZNF138_NR_+mpeak_68333|chr7_64254765_64291828_ZNF138_NM_+||	6	+	uc011kdp.3:64254946:64291864:+;uc031sxl.1:64254946:64292580:+;uc031sxm.1:64254946:64291864:+;uc011kdq.3:64254946:64292580:+;uc003ttg.4:64254946:64276008:+
chr7:72234593-72234652:mpeak_1111|chr7_72040704_72298813_TYW1B_NM_-	-	TYW1B	IPA_up_by_Doxo_in_Poly_at_6h	chr7	72234587	72234648	chr7:72234587-72234648:mpeak_68483|chr7_72040704_72298813_TYW1B_NM_-|	4	-	uc011keh.1:72023756:72298654:-;uc011kej.2:72040482:72298654:-
chr7:72875707-72875762:mpeak_1115|chr7_72856023_72936615_BAZ1B_NM_-	-	BAZ1B	IPA_up_by_Doxo_in_Poly_at_6h	chr7	72875707	72875762	chr7:72875707-72875762:mpeak_68523|chr7_72856023_72936615_BAZ1B_NM_-|	69	-	uc003tyc.3:72856525:72936263:-
chr7:75070412-75070468:mpeak_1119|chr7_75048176_75115565_POM121C_NM_-	-	POM121C	IPA_up_by_Doxo_in_Poly_at_6h	chr7	75070413	75070468	chr7:75070413-75070468:mpeak_68662|chr7_75048176_75115565_POM121C_NM_-|	191	-	uc003udk.4:75048078:75070774:-;uc010lde.1:75066792:75071993:-
chr7:98015185-98015522:mpeak_1124|chr7_97922908_98030427_BAIAP2L1_NM_-	-	BAIAP2L1	IPA_up_by_Doxo_in_Poly_at_18h	chr7	98015263	98015522	chr7:98015263-98015522:mpeak_76188|chr7_97922908_98030427_BAIAP2L1_NM_-|	111.09	-	uc003upj.3:97922832:98030164:-
chr8:109245592-109245769:mpeak_1187|chr8_109214152_109260959_EIF3E_NM_-	-	EIF3E	IPA_up_by_Doxo_in_Poly_at_6h	chr8	109245592	109245673	chr8:109245592-109245673:mpeak_73017|chr8_109214152_109260959_EIF3E_NM_-|	301	-	uc003ymt.3:109214113:109254085:-;uc003ymu.3:109214113:109260931:-
chr8:131164976-131165031:mpeak_1195|chr8_131067051_131455906_ASAP1_NM_-	-	ASAP1	IPA_up_by_Doxo_in_Poly_at_6h	chr8	131164976	131165032	chr8:131164976-131165032:mpeak_73459|chr8_131067051_131455906_ASAP1_NM_-|	35	-	uc003ysz.2:131066976:131193080:-;uc011liw.2:131066976:131373953:-;uc003yta.2:131066976:131414189:-
chr8:145134107-145134313:mpeak_1205|chr8_145133521_145135144_EXOSC4_NM_+	+	EXOSC4	IPA_up_by_Doxo_in_Poly_at_6h	chr8	145134109	145134250	chr8:145134109-145134250:mpeak_73775|chr8_145133521_145135144_EXOSC4_NM_+|	113	+	uc003zau.3:145133631:145135504:+
chr8:146125232-146125294:mpeak_1210|chr8_146108221_146126846_ZNF250_NM_-	-	ZNF250	IPA_up_by_Doxo_in_Poly_at_6h	chr8	146125232	146125297	chr8:146125232-146125297:mpeak_73900|chr8_146108221_146126846_ZNF250_NM_-|	10	-	-
chr8:146217341-146217483:mpeak_1211|chr8_146203939_146228285_ZNF252P_NR_-	-	ZNF252P	IPA_up_by_Doxo_in_Poly_at_6h	chr8	146217343	146217476	chr8:146217343-146217476:mpeak_73911|chr8_146203939_146228285_ZNF252P_NR_-|	30	-	uc011llo.2:146202524:146225022:-
chr9:106892001-106892135:mpeak_1243|chr9_106856540_106901419_SMC2_NM_+	+	SMC2	IPA_up_by_Doxo_in_Poly_at_18h	chr9	106891956	106892129	chr9:106891956-106892129:mpeak_83498|chr9_106856540_106901419_SMC2_NM_+|	46.86	+	uc004bbv.3:106857665:106901596:+;uc004bbw.3:106857665:106901596:+;uc011lvl.2:106857665:106901596:+;uc004bbx.3:106857665:106901596:+
chr9:140514620-140514677:mpeak_1261|chr9_140513443_140729224_EHMT1_NM_+	+	EHMT1	IPA_up_by_Doxo_in_Poly_at_6h	chr9	140514620	140514676	chr9:140514620-140514676:mpeak_77138|chr9_140513443_140729224_EHMT1_NM_+|	94	+	uc004coa.3:140513480:140678602:+;uc011mfc.2:140513480:140729405:+
chr9:37781920-37782024:mpeak_1228|chr9_37780877_37785089_EXOSC3_NM_-	-	EXOSC3	IPA_up_by_Doxo_in_Poly_at_6h	chr9	37781924	37781974	chr9:37781924-37781974:mpeak_74613|chr9_37780877_37785089_EXOSC3_NM_-|	54	-	uc004aal.3:37780675:37785041:-;uc004aam.3:37780856:37785041:-
chr9:5092352-5092415:mpeak_1214|chr9_4985244_5126683_JAK2_NM_+	+	JAK2	IPA_up_by_Doxo_in_Poly_at_6h	chr9	5092352	5092412	chr9:5092352-5092412:mpeak_74031|chr9_4985244_5126683_JAK2_NM_+|	42	+	uc010mhm.3:5021987:5126791:+;uc003ziw.3:5021987:5126791:+
chr9:5093227-5093422:mpeak_1217|chr9_4985244_5126683_JAK2_NM_+	+	JAK2	IPA_up_by_Doxo_in_Poly_at_18h	chr9	5093227	5093411	chr9:5093227-5093411:mpeak_81690|chr9_4985244_5126683_JAK2_NM_+|	11.63	+	uc010mhm.3:5021987:5126791:+;uc003ziw.3:5021987:5126791:+
chr9:84248377-84248441:mpeak_1231|chr9_84199220_84304450_TLE1_NM_-	-	TLE1	IPA_up_by_Doxo_in_Poly_at_6h	chr9	84248382	84248441	chr9:84248382-84248441:mpeak_74940|chr9_84199220_84304450_TLE1_NM_-|	466	-	uc004aly.3:84199112:84303155:-;uc004alz.3:84199112:84303155:-;uc011lsr.2:84199112:84303155:-;uc004ama.1:84205715:84303155:-;uc011lss.1:84226683:84303155:-
chr9:95301544-95301620:mpeak_1232|chr9_95087749_95375300_CENPP_NM_+	+	CENPP	IPA_up_by_Doxo_in_Poly_at_18h	chr9	95301734	95301812	chr9:95301734-95301812:mpeak_83112|chr9_95087749_95375300_CENPP_NM_+|	12.82	+	uc004arz.3:95088280:95375431:+;uc010mqx.3:95099869:95375431:+
chr9:95301544-95301620:mpeak_1232|chr9_95087749_95375300_CENPP_NM_+	+	CENPP	IPA_up_by_Doxo_in_Poly_at_6h	chr9	95301756	95301811	chr9:95301756-95301811:mpeak_75206|chr9_95087749_95375300_CENPP_NM_+|	17	+	uc004arz.3:95088280:95375431:+;uc010mqx.3:95099869:95375431:+
chr9:95301751-95301812:mpeak_1233|chr9_95087749_95375300_CENPP_NM_+	+	CENPP	IPA_up_by_Doxo_in_Poly_at_18h	chr9	95301734	95301812	chr9:95301734-95301812:mpeak_83112|chr9_95087749_95375300_CENPP_NM_+|	12.82	+	uc004arz.3:95088280:95375431:+;uc010mqx.3:95099869:95375431:+
chr9:95301751-95301812:mpeak_1233|chr9_95087749_95375300_CENPP_NM_+	+	CENPP	IPA_up_by_Doxo_in_Poly_at_6h	chr9	95301756	95301811	chr9:95301756-95301811:mpeak_75206|chr9_95087749_95375300_CENPP_NM_+|	17	+	uc004arz.3:95088280:95375431:+;uc010mqx.3:95099869:95375431:+
chr9:97784398-97784575:mpeak_1235|chr9_97488950_97848963_C9orf3_NM_+	+	C9orf3	IPA_up_by_Doxo_in_Poly_at_6h	chr9	97784125	97784266	chr9:97784125-97784266:mpeak_75305|chr9_97488950_97848963_C9orf3_NM_+|	40	+	uc004auy.3:97522065:97844997:+;uc004auz.1:97522065:97843098:+;uc004ava.3:97522065:97844997:+;uc011luj.2:97766505:97844997:+;uc011luk.2:97766505:97844997:+
chrX:100879151-100879213:mpeak_1275|chrX_100878119_100879823_ARMCX3_NM_+	+	ARMCX3	IPA_up_by_Doxo_in_Poly_at_6h	chrX	100879151	100879213	chrX:100879151-100879213:mpeak_78640|chrX_100878119_100879823_ARMCX3_NM_+|	56	+	-
chrX:70587121-70587279:mpeak_1272|chrX_70586088_70749562_TAF1_NR_+	+	TAF1	IPA_up_by_Doxo_in_Poly_at_6h	chrX	70587124	70587200	chrX:70587124-70587200:mpeak_78303|chrX_70586088_70749562_TAF1_NR_+mpeak_78303|chrX_70586088_70683673_TAF1_NM_+||	73	+	uc004dzt.4:70586164:70683896:+;uc004dzu.4:70586164:70683896:+
chrX:76909575-76909702:mpeak_1273|chrX_76764107_77041755_ATRX_NM_-	-	ATRX	IPA_up_by_Doxo_in_Poly_at_18h	chrX	76909576	76909694	chrX:76909576-76909694:mpeak_86632|chrX_76764107_77041755_ATRX_NM_-|	128.1	-	uc004ecp.4:76763828:77041487:-;uc004ecq.4:76763828:77041487:-;uc004eco.4:76763828:76940447:-
chrX:76909575-76909702:mpeak_1273|chrX_76764107_77041755_ATRX_NM_-	-	ATRX	IPA_up_by_Doxo_in_Poly_at_6h	chrX	76909576	76909694	chrX:76909576-76909694:mpeak_78444|chrX_76764107_77041755_ATRX_NM_-|	53	-	uc004ecp.4:76763828:77041487:-;uc004ecq.4:76763828:77041487:-;uc004eco.4:76763828:76940447:-
