# Supplementary material for: Compartment-specific and ELAVL1-coordinated regulation of intronic polyadenylation isoforms by doxorubicin
Source: HighWire-hosted journal article supplement (doi:10.1101/gr.276192.121), 2022-07-01
Supplement: Supplemental_Table_S11.xlsx.xlsx [file Supplemental_Table_S11.xlsx.xlsx]

## Sheet: Sheet1
Supplemental Table S11 : 3’-seq data set of IPA:LE isoform ratio regulation in polysomes versus cytosol in vehicle-treated MCF-7 cells.
							Poly	Poly	Poly	Cyto	Cyto	Cyto	Poly	Poly	Poly	Cyto	Cyto	Cyto
IPA peaks	baseMean	log2FoldChange IPA:LE	lfcSE	stat	pvalue	padj	6	15	27	1	11	21	LE.06	LE.15	LE.27	LE.01	LE.11	LE.21	%IPA (Poly)	log2FC_IPA	log2FC_LE	log2FC IPA-logFC LE	gene	Tian polyA site	Zavolan polyA site
chr15:36907602-36907688:mpeak_28551|chr15_36871803_37100524_C15orf41_NM_+|	256.201	-1.67053	0.789606	-2.11565	0.0343748	0.131108	490.275	615.062	663.455	371.231	463.799	441.352	15.3211	6.35176	2.5616	1.02834	2.85708	1.11312	7298.66	0.470704	2.27748	-1.80678	C15orf41	-	-
chr20:391233-391415:mpeak_52394|chr20_388708_410993_RBCK1_NM_+|	545.685	-1.52551	0.406204	-3.75554	0.00017297	0.00462641	614.547	838.433	816.297	1159.97	1713.3	1214.41	32.3446	39.1692	46.1088	19.5385	25.7137	28.3846	1929.29	-0.84905	0.675667	-1.52472	RBCK1	chr20:391355:+;chr20:391408:+	chr20_410649_+;chr20_410701_+;chr20_410763_+
chr1:111690249-111690431:mpeak_4100|chr1_111682248_111726812_CEPT1_NM_+|	365.387	-1.00303	0.310801	-3.22724	0.0012499	0.0153262	468.145	598.124	610.515	804.163	768.555	753.026	57.8797	75.1625	91.3638	47.3037	58.094	52.3167	747.21	-0.471995	0.508798	-0.980793	CEPT1	-	chr1_111147687_+;chr1_111147738_+
chr15:101815449-101815568:mpeak_31248|chr15_101811850_101817725_VIMP_NM_-|	156.028	-0.998693	0.398046	-2.50899	0.0121077	0.0672811	275.78	290.064	278.361	241.66	323.802	283.289	27.2375	38.1106	52.0859	19.5385	25.7137	16.6968	718.876	-0.00775037	0.922697	-0.930447	VIMP	-	chr15_101275305_-
chr1:114242644-114242707:mpeak_4259|chr1_114240347_114301777_PHTF1_NM_-|	44.9713	-1.53953	0.761331	-2.02216	0.0431602	0.15413	59.5821	87.8661	48.6704	71.9839	81.903	143.036	10.2141	15.8794	4.26934	7.19839	5.71416	3.33936	645.917	-0.598362	0.901696	-1.50006	PHTF1	chr1:114242647:-	chr1_113700028_-
chr9:131591375-131591448:mpeak_87617|chr9_131585112_131592100_C9orf114_NM_-|	631.207	-0.89463	0.273217	-3.27443	0.00105875	0.0138095	893.731	956.999	1148.45	1223.73	1219.02	1276.75	173.639	150.325	190.412	92.5508	124.759	124.113	583.071	-0.310538	0.591266	-0.901804	C9orf114	-	chr9_128829111_-
chr7:98478825-98478885:mpeak_78989|chr7_98476112_98609693_TRRAP_NM_+|	19.4265	-4.2145	1.57519	-2.67555	0.00746066	0.0487945	103.843	24.3484	29.0315	26.7369	5.71416	15.5837	13.6188	7.41039	6.83094	0	0	0	564.33	1.71066	Inf	-Inf	TRRAP	-	-
chr7:98479371-98479510:mpeak_78990|chr7_98476112_98609693_TRRAP_NM_+|	28.2617	-5.98141	1.42419	-4.19987	2.67069e-05	0.00139337	83.4149	34.9347	33.3008	82.2673	42.8562	34.5067	13.6188	7.41039	6.83094	0	0	0	544.329	-0.0739847	Inf	-Inf	TRRAP	chr7:98479507:+	chr7_98881783_+;chr7_98881804_+;chr7_98881884_+
chr3:9799002-9799098:mpeak_57611|chr3_9791627_9807492_OGG1_NM_+|	104.17	-0.746745	0.358061	-2.08552	0.0370219	0.138333	151.509	149.266	181.874	197.442	211.424	192.57	23.8328	34.9347	35.8624	20.5668	25.7137	25.0452	510.038	-0.317436	0.407874	-0.725309	OGG1	chr3:9799091:+	chr3_9757403_+
chr3:195966418-195966624:mpeak_62846|chr3_195965765_196014584_PCYT1A_NM_-|	100.774	-1.34302	0.410487	-3.27178	0.00106874	0.0138969	127.676	170.439	171.627	211.838	212.376	164.742	27.2375	31.7588	40.9856	17.4818	18.0948	15.0271	469.827	-0.326292	0.982423	-1.30871	PCYT1A	chr3:195966418:-	-
chr1:114269030-114269120:mpeak_4268|chr1_114240347_114301777_PHTF1_NM_-|	35.8326	-1.76239	0.72164	-2.4422	0.014598	0.0758808	39.1539	58.2245	40.9856	78.154	59.9987	106.86	10.2141	15.8794	4.26934	7.19839	5.71416	3.33936	455.702	-0.824384	0.901696	-1.72608	PHTF1	chr1:114269040:-	chr1_113726421_-
chr19:50484890-50485015:mpeak_44763|chr19_50480041_50528805_VRK3_NM_-|	96.1386	-0.913866	0.392136	-2.33048	0.0197806	0.091159	120.866	149.266	133.203	209.782	200.948	175.873	27.2375	37.052	28.1776	16.4535	31.4279	23.3755	436.194	-0.540401	0.375911	-0.916311	VRK3	chr19:50484888:-;chr19:50484962:-	chr19_49981686_-
chr2:233433851-233433931:mpeak_51999|chr2_233415296_233445613_EIF4E2_NM_+|	291.307	-0.707463	0.327774	-2.15839	0.0308975	0.123066	391.539	366.285	497.805	472.009	635.224	594.963	97.0337	83.6316	113.564	79.1823	74.2841	90.1628	426.751	-0.438987	0.272255	-0.711242	EIF4E2	chr2:233433859:+;chr2:233433886:+;chr2:233433920:+	chr2_232569209_+
chr7:5390913-5391068:mpeak_76818|chr7_5347943_5463177_TNRC18_NM_-mpeak_76818|chr7_5347943_5463177_TNRC18_NM_-||	714.538	-1.81886	0.426209	-4.26753	1.97653e-05	0.00114422	1232.5	1719.21	1589.9	842.212	993.312	843.189	551.56	275.243	333.008	64.7855	79.9983	49.5339	391.582	0.761664	2.5774	-1.81574	TNRC18	chr7:5390919:-;chr7:5390944:-	chr7_5351329_-
chr9:33348666-33348734:mpeak_85118|chr9_33290417_33369903_NFX1_NM_+|	43.49	-1.56783	0.654031	-2.39718	0.0165218	0.0817098	51.0703	43.4037	44.4011	71.9839	126.664	120.774	17.0234	5.29314	14.5157	6.17005	6.66652	13.914	377.047	-1.20167	0.461403	-1.66307	NFX1	chr9:33348725:+	chr9_33348690_+;chr9_33348741_+
chr1:121115732-121116037:mpeak_4720|chr1_121107151_121129494_SRGAP2D_NR_+|	20.2291	-2.40263	0.812852	-2.95581	0.00311853	0.0277451	25.5352	22.2312	37.5702	48.3321	39.0468	39.5158	10.2141	9.52765	4.26934	1.02834	3.80944	1.66968	355.405	-0.572396	1.88353	-2.45593	SRGAP2D	-	-
chr1:24975343-24975529:mpeak_1151|chr1_24969593_24998672_SRRM1_NM_+|	249.658	-0.972911	0.42655	-2.28088	0.0225553	0.0993419	372.814	422.392	452.55	336.268	372.373	421.316	200.877	80.4557	142.596	64.7855	70.4747	58.9954	294.332	0.143068	1.12586	-0.982796	SRRM1	-	chr1_24648870_+
chrX:101409708-101409771:mpeak_89895|chrX_101409274_101410986_BEX5_NM_-|	56.0937	-1.54591	0.531089	-2.91082	0.00360482	0.0302771	56.1774	64.5763	61.4785	101.806	162.854	112.425	27.2375	20.1139	19.639	9.25508	24.7614	12.8009	272.027	-1.04911	0.516912	-1.56602	BEX5	chrX:101409712:-	chrX_102154743_-;chrX_102154768_-
chr12:122468631-122468696:mpeak_22229|chr12_122459791_122496997_BCL7A_NM_+|	289.206	-1.36277	0.328793	-4.14475	3.40181e-05	0.00166197	376.218	359.933	384.24	596.438	579.987	512.592	185.556	99.511	134.057	83.2957	72.3794	86.2668	267.318	-0.592181	0.792716	-1.3849	BCL7A	chr12:122468687:+	chr12_122030781_+
chr22:38519859-38519910:mpeak_56835|chr22_38508312_38577836_PLA2G6_NM_-|	16.6383	-4.93683	1.29972	-3.79837	0.000145651	0.00417303	8.51172	28.5829	15.3696	33.9353	47.618	43.9683	1.70234	9.52765	8.53867	0	1.90472	0	265.391	-1.25853	3.37556	-4.63409	PLA2G6	-	-
chr4:4276087-4276484:mpeak_63430|chr4_4269750_4291896_LYAR_NM_-|	105.344	-1.40833	0.529584	-2.65931	0.00783018	0.050242	59.5821	134.446	72.5787	287.936	253.328	229.859	54.475	27.5243	28.1776	33.9353	46.6656	35.6199	241.98	-1.53225	-0.0770453	-1.4552	LYAR	-	chr4_4274449_-;chr4_4274530_-;chr4_4274619_-;chr4_4274648_-;chr4_4274683_-
chr17:35500755-35500819:mpeak_37058|chr17_35444374_35766902_ACACA_NM_-|	466.63	-1.88951	0.426214	-4.43323	9.28299e-06	0.000664914	570.286	742.098	673.701	785.653	864.743	860.442	352.385	318.647	152.842	93.5791	79.9983	105.19	241.066	-0.338242	1.56336	-1.90161	ACACA	-	-
chr3:196014396-196014538:mpeak_62852|chr3_195965765_196014584_PCYT1A_NM_-|	58.3915	-1.40386	0.462794	-3.03344	0.00241785	0.0234435	51.0703	88.9247	96.487	105.919	111.426	96.2849	27.2375	31.7588	40.9856	17.4818	18.0948	15.0271	236.525	-0.407334	0.982423	-1.38976	PCYT1A	-	-
chr3:195997317-195997425:mpeak_62850|chr3_195965765_196014584_PCYT1A_NM_-|	53.6393	-1.34651	0.452562	-2.9753	0.002927	0.0266584	52.7727	76.2212	87.9483	106.948	85.7124	83.484	27.2375	31.7588	40.9856	17.4818	18.0948	15.0271	216.981	-0.34811	0.982423	-1.33053	PCYT1A	-	chr3_196270500_-
chr17:7217809-7217935:mpeak_35760|chr17_7216158_7218658_GPS2_NM_-|	84.3694	-1.21895	0.518299	-2.35184	0.018681	0.0879133	71.4985	81.5143	123.811	166.591	213.329	125.226	35.7492	33.8761	58.9169	32.9069	42.8562	26.1583	215.356	-0.867734	0.334784	-1.20252	GPS2	chr17:7217870:-	chr17_7314548_-
chr20:17581330-17581663:mpeak_52816|chr20_17550598_17587681_DSTN_NM_+|	2132.94	-0.709475	0.244696	-2.89941	0.00373861	0.0310078	2236.88	2201.94	2221.76	4169.93	4138	3870.88	941.397	1044.87	1201.39	969.726	1381.87	1216.64	208.95	-0.870651	-0.162719	-0.707933	DSTN	chr20:17581670:+	chr20_17600890_+;chr20_17600938_+;chr20_17600963_+;chr20_17600989_+;chr20_17601023_+
chr12:69756563-69756688:mpeak_20405|chr12_69753489_69783926_YEATS4_NM_+|	161.373	-0.505122	0.250943	-2.0129	0.0441257	0.15657	151.509	155.618	172.481	295.134	319.993	301.656	76.6055	78.3384	75.9942	99.7491	104.76	104.633	207.678	-0.934724	-0.420764	-0.51396	YEATS4	-	-
chr13:26795393-26795543:mpeak_23133|chr13_26789729_26796508_RNF6_NM_-|	143.127	-1.11799	0.544452	-2.05343	0.040031	0.146468	42.5586	93.1592	31.5931	455.555	364.754	385.696	34.0469	26.4657	20.4928	83.2957	98.0931	81.8144	206.543	-2.84963	-1.70009	-1.14955	RNF6	chr13:26795385:-	-
chr15:52527866-52527968:mpeak_29441|chr15_52486251_52587995_MYO5C_NM_-|	175.13	-1.08193	0.420975	-2.57006	0.0101682	0.0602674	80.0102	131.27	72.5787	506.972	411.42	452.484	62.9868	32.8174	42.6934	103.863	100.95	103.52	204.956	-2.27185	-1.15463	-1.11722	MYO5C	chr15:52527867:-	-
chr14:20923389-20923633:mpeak_24878|chr14_20923289_20925149_APEX1_NM_+|	334.086	-1.36847	0.513492	-2.66502	0.00769834	0.0498737	623.058	351.464	617.346	537.823	402.848	406.846	415.372	167.263	223.713	79.1823	102.855	81.2578	197.417	0.240418	1.61472	-1.37431	APEX1	-	-
chr2:162165010-162165124:mpeak_50021|chr2_162164785_162267812_PSMD14_NM_+|	707.904	-1.21337	0.334045	-3.63237	0.000280833	0.00615842	754.139	854.312	923.885	1294.68	1124.74	1400.31	476.657	500.731	322.762	221.093	330.469	291.081	194.773	-0.593	0.625683	-1.21868	PSMD14	-	chr2_161308602_+
chr5:149775981-149776416:mpeak_70841|chr5_149737201_149779372_TCOF1_NM_+|	210.938	-1.01112	0.389879	-2.59342	0.00950255	0.0574915	401.753	338.761	514.882	178.931	169.52	144.149	194.067	177.849	282.63	48.3321	44.7609	35.6199	191.796	1.34965	2.34634	-0.996688	TCOF1	chr5:149776241:+;chr5:149776359:+;chr5:149776406:+	chr5_150396679_+;chr5_150396752_+;chr5_150396766_+;chr5_150396797_+;chr5_150396846_+
chr16:77235913-77236014:mpeak_34482|chr16_77233348_77246753_SYCE1L_NM_+|	20.538	-3.27627	1.60507	-2.04121	0.0412304	0.149114	34.0469	16.938	52.9398	44.2187	31.4279	45.6379	0	0	18.7851	0	1.90472	0.55656	184.41	-0.222857	2.93211	-3.15496	SYCE1L	-	chr16_77202116_+
chr1:114290947-114291225:mpeak_4274|chr1_114240347_114301777_PHTF1_NM_-|	18.1303	-2.10294	0.814557	-2.58169	0.0098317	0.0589166	18.7258	19.0553	15.3696	23.6519	39.0468	55.0995	10.2141	15.8794	4.26934	7.19839	5.71416	3.33936	175.052	-1.14816	0.901696	-2.04985	PHTF1	chr1:114290942:-	chr1_113748325_-
chr16:10837870-10837934:mpeak_32023|chr16_10837642_10862903_NUBP1_NM_+|	228.647	-1.18815	0.434777	-2.73279	0.00628002	0.0434429	274.078	207.491	383.386	392.827	287.613	425.212	127.676	165.146	202.367	73.0123	98.0931	106.86	174.672	-0.3542	0.833074	-1.18727	NUBP1	-	-
chr1:228823174-228823290:mpeak_8591|chr1_228780393_228879031_RHOU_NR_+|	36.7272	-1.88992	0.718004	-2.63219	0.00848362	0.0529621	54.475	27.5243	25.616	113.118	57.1416	62.8913	30.6422	23.2898	9.39254	15.4251	9.5236	11.6878	169.943	-1.11538	0.789484	-1.90486	RHOU	-	-
chrX:24717533-24717655:mpeak_88724|chrX_24712063_25013921_POLA1_NM_+|	76.2336	-1.36967	0.683598	-2.00363	0.0451101	0.158507	158.318	100.57	70.871	127.514	84.7601	95.1718	124.271	46.5796	34.1547	23.6519	19.9996	28.9411	160.854	0.101076	1.49777	-1.39669	POLA1	-	chrX_24699513_+
chr16:2808457-2808557:mpeak_31621|chr16_2802329_2820858_SRRM2_NM_+|	1934.96	-1.12897	0.335467	-3.36536	0.000764432	0.011395	4158.83	4168.87	2619.67	1329.65	1505.68	1348.55	2667.57	2449.66	1768.36	398.997	395.229	408.515	158.989	1.38767	2.51726	-1.12958	SRRM2	-	chr16_2758473_+;chr16_2758508_+
chr5:64850616-64850775:mpeak_68164|chr5_64814460_64858995_CENPK_NM_-|	26.1401	-1.54927	0.777045	-1.9938	0.0461737	0.161065	13.6188	26.4657	23.9083	62.7288	47.618	55.656	15.3211	26.4657	3.41547	10.2834	14.2854	13.914	141.57	-1.37523	0.23218	-1.60741	CENPK	-	chr5_65554833_-;chr5_65554855_-
chr8:56711627-56711788:mpeak_82093|chr8_56685790_56737139_TGS1_NM_+|	32.2165	-1.36982	0.69601	-1.96811	0.0490556	0.168066	42.5586	27.5243	11.1003	43.1904	64.7605	83.484	25.5352	20.1139	13.6619	15.4251	18.0948	21.1493	136.877	-1.2376	0.117569	-1.35517	TGS1	-	-
chr6:44371543-44371772:mpeak_73829|chr6_44355250_44414343_CDC5L_NM_+|	72.4658	-0.789415	0.357264	-2.20962	0.0271319	0.112027	85.1172	74.1039	87.9483	97.6925	104.76	104.633	74.9032	63.5176	46.1088	42.162	48.5704	40.0723	133.946	-0.313139	0.496438	-0.809577	CDC5L	-	chr6_44403880_+;chr6_44403988_+;chr6_44404021_+
chr19:6381803-6381864:mpeak_42031|chr19_6380496_6393291_GTF2F1_NM_-|	275	-0.960148	0.392906	-2.44371	0.0145372	0.0756114	282.589	282.654	461.942	388.713	396.182	292.751	236.626	217.019	322.762	151.166	145.711	121.887	132.3	-0.0691869	0.890675	-0.959861	GTF2F1	-	-
chr19:34710330-34710487:mpeak_43486|chr19_34663351_34718269_LSM14A_NM_+|	457.686	-1.45191	0.464337	-3.12685	0.00176687	0.0192443	478.359	275.243	345.816	1130.15	573.321	1086.96	366.004	235.015	230.544	244.745	276.184	249.896	132.211	-1.34375	0.109423	-1.45317	LSM14A	chr19:34710478:+	-
chr5:89703538-89703678:mpeak_68952|chr5_89689924_89705603_CETN3_NM_-|	67.0651	-1.17926	0.416077	-2.83425	0.0045934	0.035627	85.1172	49.7555	74.2865	125.458	85.7124	113.538	49.368	55.0486	55.5014	30.8503	42.8562	37.2895	130.792	-0.634543	0.526825	-1.16137	CETN3	-	-
chr10:12077049-12077450:mpeak_9515|chr10_11963306_12085169_UPF2_NM_-|	89.5618	-1.50832	0.453593	-3.32527	0.000883345	0.012485	44.261	93.1592	43.5472	200.527	196.186	198.692	47.6657	52.9314	38.424	55.5305	54.2845	49.5339	130.173	-1.71814	-0.196885	-1.52126	UPF2	-	chr10_12035061_-;chr10_12035132_-;chr10_12035156_-;chr10_12035175_-;chr10_12035222_-;chr10_12035238_-;chr10_12035349_-
chr3:138340271-138340394:mpeak_61166|chr3_138327541_138351771_FAIM_NM_+|	70.1969	-1.18147	0.392061	-3.01348	0.00258269	0.0244445	74.9032	61.4004	49.5243	134.713	127.616	115.208	42.5586	44.4623	58.063	38.0486	55.2369	40.6289	128.083	-1.02265	0.115577	-1.13823	FAIM	-	chr3_138621535_+
chr3:184024134-184024278:mpeak_62466|chr3_184016885_184026495_PSMD2_NM_+|	1114.68	-0.759417	0.230169	-3.29938	0.000968971	0.0131668	1508.28	1461.96	1730.79	1170.25	1240.93	941.7	1324.42	1166.61	1255.19	519.313	558.083	498.678	125.487	0.487577	1.2491	-0.761522	PSMD2	chr3:184024216:+	chr3_184306411_+;chr3_184306433_+;chr3_184306462_+
chr20:44652148-44652244:mpeak_53750|chr20_44650328_44686152_SLC12A5_NM_+|	11.5919	-3.5226	1.17493	-2.99814	0.00271635	0.0252848	1.70234	19.0553	13.6619	21.5952	37.142	13.3574	10.2141	6.35176	11.1003	0	3.80944	1.11312	124.41	-1.06667	2.49064	-3.5573	SLC12A5	chr20:44652220:+;chr20:44652245:+	chr20_46023588_+
chr5:64846290-64846452:mpeak_68162|chr5_64814460_64858995_CENPK_NM_-|	23.8734	-1.71949	0.759022	-2.2654	0.0234884	0.102173	20.4281	16.938	15.3696	55.5305	46.6656	47.8642	15.3211	26.4657	3.41547	10.2834	14.2854	13.914	116.666	-1.50869	0.23218	-1.74087	CENPK	chr5:64846294:-	chr5_65550468_-
chr21:46566117-46566292:mpeak_55735|chr21_46494492_46645461_ADARB1_NR_+mpeak_55735|chr21_46494492_46641932_ADARB1_NM_+||	31.1191	-1.41078	0.663232	-2.12713	0.0334093	0.129174	17.0234	27.5243	38.424	45.247	55.2369	64.0044	8.51172	33.8761	29.0315	24.6802	14.2854	15.5837	116.176	-0.987293	0.388753	-1.37605	ADARB1	chr21:46566210:+;chr21:46566291:+	chr21_45146295_+
chr2:100055001-100055172:mpeak_48557|chr2_100017815_100106480_REV1_NM_-|	17.9235	-2.16029	0.981492	-2.20103	0.0277342	0.113693	17.0234	13.7622	12.808	49.3604	20.9519	39.5158	13.6188	24.3484	1.70773	4.11337	9.5236	8.3484	109.877	-1.33306	0.851683	-2.18474	REV1	chr2:100055030:-	chr2_99438556_-
chr20:62695404-62695501:mpeak_54808|chr20_62688438_62703524_TCEA2_NM_+|	131.333	-1.05095	0.485281	-2.16565	0.0303381	0.12141	78.3079	134.446	153.696	224.178	188.567	184.778	62.9868	155.618	123.811	95.6358	83.8077	90.1628	107.019	-0.705381	0.344895	-1.05028	TCEA2	chr20:62695426:+;chr20:62695476:+;chr20:62695536:+	chr20_64064084_+;chr20_64064122_+;chr20_64064184_+
chr5:140038514-140038733:mpeak_70454|chr5_140027383_140041886_IK_NM_+|	301.035	-1.08014	0.293932	-3.67479	0.000238048	0.00554264	265.566	337.702	344.109	462.754	367.611	406.289	279.185	281.595	324.47	144.996	193.329	204.814	107.018	-0.384432	0.704761	-1.08919	IK	-	chr5_140659073_+;chr5_140659107_+;chr5_140659147_+
chr21:47706943-47707107:mpeak_55806|chr21_47706266_47717452_YBEY_NM_+|	18.2222	-1.39536	0.690116	-2.02192	0.043185	0.15413	18.7258	29.6416	11.9541	26.7369	20.9519	26.1583	20.4281	14.8208	23.0544	6.17005	6.66652	13.3574	103.461	-0.29187	1.15434	-1.44621	YBEY	chr21:47707000:+;chr21:47707049:+;chr21:47707100:+	chr21_46287092_+;chr21_46287152_+;chr21_46287187_+
chr14:35252259-35252448:mpeak_25459|chr14_35222910_35344853_BAZ1A_NM_-|	31.7951	-1.81671	0.654588	-2.77535	0.0055142	0.0399024	15.3211	28.5829	14.5157	44.2187	71.427	92.389	22.1305	24.3484	11.1003	18.5102	22.8566	16.1402	101.46	-1.8323	0.00180882	-1.8341	BAZ1A	chr14:35252249:-	chr14_34783048_-;chr14_34783163_-
chr1:118484360-118484481:mpeak_4635|chr1_118472371_118501914_WDR3_NM_+|	391.005	-0.827702	0.337366	-2.45343	0.0141502	0.0742697	575.393	450.975	510.613	377.401	298.089	376.791	614.547	369.461	533.667	214.923	167.615	202.588	101.272	0.546578	1.37504	-0.828463	WDR3	-	-
chr17:49340620-49340739:mpeak_38100|chr17_49337896_49375142_UTP18_NM_+|	200.575	-0.789365	0.288695	-2.73425	0.00625218	0.0434398	229.817	174.674	234.814	212.867	222.852	272.158	204.281	241.367	198.951	133.684	142.854	138.584	99.1784	-0.146997	0.634868	-0.781865	UTP18	-	chr17_51263364_+
chr1:114289372-114289460:mpeak_4272|chr1_114240347_114301777_PHTF1_NM_-|	15.4545	-3.38871	0.950305	-3.56592	0.000362586	0.00715581	0	10.5863	9.39254	29.8219	49.5227	39.5158	10.2141	15.8794	4.26934	7.19839	5.71416	3.33936	98.7004	-2.57273	0.901696	-3.47442	PHTF1	chr1:114289390:-	chr1_113746722_-;chr1_113746769_-
chr14:73569856-73570188:mpeak_26906|chr14_73525220_73586420_RBM25_NM_+|	173.155	-1.39624	0.426079	-3.27696	0.00104932	0.0137716	97.0337	174.674	77.7019	335.239	332.374	320.022	120.866	132.328	105.026	107.976	130.473	144.149	97.5402	-1.49906	-0.0949823	-1.40408	RBM25	chr14:73569856:+	chr14_73103167_+;chr14_73103210_+;chr14_73103242_+;chr14_73103392_+;chr14_73103436_+;chr14_73103475_+
chrX:119570345-119570409:mpeak_90182|chrX_119565317_119603204_LAMP2_NM_-|	215.999	-0.715731	0.320939	-2.23011	0.0257398	0.107735	257.054	299.592	238.229	157.336	221.9	225.963	292.803	267.833	254.452	99.7491	139.045	138.027	97.52	0.393316	1.11308	-0.719763	LAMP2	chrX:119570349:-;chrX:119570379:-	chrX_120436496_-;chrX_120436540_-
chr16:89864756-89864862:mpeak_35082|chr16_89805116_89883065_FANCA_NM_-|	105.328	-0.979961	0.437602	-2.23939	0.0251308	0.106097	93.629	193.729	134.057	77.1256	89.5219	100.181	151.509	118.566	165.65	56.5588	39.9991	43.4117	96.7158	0.65933	1.6383	-0.978975	FANCA	chr16:89864762:-;chr16:89864793:-	chr16_89798356_-;chr16_89798402_-
chr17:36003358-36003416:mpeak_37104|chr17_35974398_36003493_DDX52_NM_-|	64.716	-1.06872	0.48486	-2.20418	0.0275114	0.113183	61.2844	46.5796	29.0315	141.911	89.5219	97.398	42.5586	61.4004	39.2779	51.4171	59.9987	56.2126	95.5728	-1.26427	-0.226863	-1.03741	DDX52	-	-
chr22:50829212-50829273:mpeak_57408|chr22_50781745_50882627_PPP6R2_NM_+|	77.8989	-2.18851	0.493245	-4.43696	9.12362e-06	0.000659084	49.368	51.8727	52.9398	183.045	182.853	135.801	45.9633	33.8761	82.8251	32.9069	37.142	46.1945	94.7844	-1.7022	0.48475	-2.18695	PPP6R2	-	-
chr12:104325289-104325406:mpeak_21228|chr12_104324111_104341410_HSP90B1_NM_+|	2128.39	-0.93714	0.338504	-2.76848	0.00563193	0.0405116	1600.2	2462.37	1759.82	2678.83	3056.12	2878.53	2248.8	2125.72	1892.17	1208.3	1979	1650.76	92.9101	-0.564985	0.373274	-0.938259	HSP90B1	chr12:104325396:+	-
chr15:72170372-72170426:mpeak_30254|chr15_72119384_72410440_MYO9A_NM_-|	27.0995	-1.61114	0.614466	-2.62202	0.00874105	0.0542433	25.5352	11.6449	15.3696	59.6438	56.1892	42.8551	22.1305	22.2312	12.808	23.6519	11.4283	21.7059	91.9188	-1.59444	0.00971384	-1.60415	MYO9A	-	chr15_71878044_-
chr7:5399020-5399199:mpeak_76820|chr7_5347943_5463177_TNRC18_NM_-mpeak_76820|chr7_5347943_5463177_TNRC18_NM_-||	237.884	-1.46417	0.475851	-3.07695	0.00209133	0.0214731	422.182	301.709	303.123	204.64	128.569	140.253	551.56	275.243	333.008	64.7855	79.9983	49.5339	88.55	1.11713	2.5774	-1.46027	TNRC18	-	chr7_5359398_-
chr8:30608979-30609046:mpeak_81594|chr8_30601681_30623742_UBXN8_NM_+|	134.289	-1.01777	0.410603	-2.47872	0.0131853	0.0710276	131.081	110.097	107.587	155.28	131.426	255.461	148.104	125.977	132.349	87.409	120.95	105.746	85.8118	-0.63648	0.371759	-1.00824	UBXN8	-	chr8_30751518_+
chr8:95541236-95541509:mpeak_82938|chr8_95501088_95565746_KIAA1429_NM_-|	243.175	-0.794458	0.369694	-2.14896	0.0316376	0.124896	245.138	300.65	176.751	281.766	248.566	270.488	367.706	251.953	232.252	200.527	164.758	177.543	84.8138	-0.148404	0.65021	-0.798613	KIAA1429	-	chr8_94529079_-;chr8_94529107_-;chr8_94529180_-;chr8_94529231_-
chr17:73036189-73036263:mpeak_39429|chr17_73035158_73043074_ATP5H_NM_-|	437.766	-0.83055	0.351498	-2.36289	0.0181332	0.0863934	507.299	296.416	520.859	520.341	445.705	455.266	587.309	440.389	536.229	347.579	281.899	313.9	84.6954	-0.101695	0.729265	-0.83096	ATP5H	chr17:73036190:-	chr17_75040111_-;chr17_75040143_-
chr5:77477418-77477493:mpeak_68698|chr5_77298879_77590579_AP3B1_NM_-|	63.484	-0.988289	0.493055	-2.00442	0.0450253	0.158366	93.629	71.9867	71.7249	53.4738	43.8086	55.656	122.569	102.687	55.5014	22.6235	38.0944	30.0543	84.5359	0.634008	1.629	-0.994992	AP3B1	-	-
chr17:74221857-74222103:mpeak_39584|chr17_74141434_74236390_RNF157_NM_-|	33.2869	-1.05653	0.485628	-2.1756	0.0295851	0.119151	22.1305	28.5829	29.0315	38.0486	55.2369	48.9773	32.3446	30.7002	32.447	23.6519	37.142	21.1493	83.5098	-0.835094	0.220751	-1.05585	RNF157	-	-
chr1:10707259-10707347:mpeak_525|chr1_10700116_10856733_CASZ1_NM_-|	100.15	-1.19674	0.517577	-2.3122	0.0207668	0.0939853	83.4149	87.8661	174.189	91.5224	117.14	82.3709	160.02	164.087	90.5099	57.5871	48.5704	44.5248	83.3225	0.247374	1.46027	-1.2129	CASZ1	chr1:10707270:-	chr1_10647204_-
chr5:157240068-157240251:mpeak_71061|chr5_157215000_157286183_CLINT1_NM_-|	337.232	-0.824581	0.338235	-2.43789	0.0147733	0.0765097	202.579	348.288	365.455	401.053	398.087	387.366	393.242	405.454	328.739	257.085	253.328	306.108	81.275	-0.372791	0.465482	-0.838273	CLINT1	-	chr5_157813220_-
chr2:201677909-201678007:mpeak_50985|chr2_201676268_201686869_BZW1_NM_+|	869.312	-0.794004	0.323802	-2.45213	0.0142015	0.0742697	589.011	770.681	495.243	1373.86	996.169	1299.01	771.162	861.723	660.039	772.285	940.932	901.628	80.8982	-0.984036	-0.189536	-0.7945	BZW1	-	chr2_200813273_+
chr12:6688004-6688077:mpeak_17756|chr12_6679859_6716599_CHD4_NM_-|	1516.66	-0.899062	0.373151	-2.40938	0.0159797	0.0797078	2083.67	2693.15	1767.51	637.572	767.602	721.859	3154.45	3095.43	1864.85	402.082	544.75	466.954	80.6476	1.6214	2.52098	-0.899576	CHD4	chr12:6688012:-	-
chr17:62498272-62498684:mpeak_39049|chr17_62496444_62502484_DDX5_NM_-|	1627.54	-0.7812	0.370752	-2.10707	0.0351116	0.132958	1777.25	1347.63	2307.15	1625.81	1210.45	1353.55	2066.65	1951.05	2822.03	845.297	1149.5	1074.16	79.4188	0.374606	1.15619	-0.781585	DDX5	chr17:62498280:-;chr17:62498393:-;chr17:62498499:-	chr17_64502207_-;chr17_64502276_-;chr17_64502376_-
chr9:139720221-139720285:mpeak_88128|chr9_139702373_139734773_RABL6_NM_+|	149.85	-1.24194	0.33142	-3.74732	0.000178731	0.00472073	134.485	114.332	124.665	248.859	184.758	190.9	183.853	128.094	158.819	96.6641	104.76	128.009	79.3348	-0.741703	0.515028	-1.25673	RABL6	chr9:139720279:+	chr9_136825818_+
chr16:47001415-47001535:mpeak_33360|chr16_46991132_47007625_DNAJA2_NM_-|	165.237	-0.854944	0.280504	-3.04789	0.00230457	0.0227815	192.365	143.973	132.349	182.016	175.234	174.76	195.77	200.081	204.928	112.089	139.045	130.235	78.0134	-0.182828	0.655646	-0.838474	DNAJA2	-	-
chr17:76794979-76795048:mpeak_39733|chr17_76794633_76836969_USP36_NM_-|	69.6637	-0.905222	0.460705	-1.96486	0.0494301	0.168801	71.4985	50.8141	111.857	52.4454	57.1416	69.0135	105.545	88.9247	106.733	45.247	33.3326	43.4117	77.7445	0.390815	1.30396	-0.913145	USP36	chr17:76794989:-	-
chr10:127522380-127522521:mpeak_13133|chr10_127512103_127541693_BCCIP_NM_+|	40.1431	-1.41709	0.659518	-2.14868	0.0316598	0.124925	28.9399	31.7588	29.8854	95.6358	28.5708	62.3348	51.0703	43.4037	22.2006	23.6519	31.4279	32.8371	77.6382	-1.04217	0.40828	-1.45045	BCCIP	-	-
chr2:232323712-232323846:mpeak_51955|chr2_232319978_232329205_NCL_NM_-|	2089.65	-0.606884	0.25438	-2.38574	0.0170447	0.0830806	1601.91	2033.62	1706.03	2524.58	2080.91	2291.92	2005.36	2564	2378.02	1704.99	2105.67	2078.75	76.8859	-0.368793	0.238345	-0.607138	NCL	chr2:232323736:-;chr2:232323774:-	-
chr1:40035256-40035348:mpeak_2022|chr1_40026794_40042521_PABPC4_NM_-|	266.5	-1.63014	0.462659	-3.52341	0.000426035	0.00786211	297.91	247.719	256.16	397.968	229.519	309.448	526.025	255.129	279.215	112.089	157.139	129.679	75.6142	-0.224725	1.41044	-1.63517	PABPC4	-	-
chr14:35252960-35253068:mpeak_25460|chr14_35222910_35344853_BAZ1A_NM_-|	21.2033	-1.96522	0.993948	-1.97719	0.0480207	0.165364	8.51172	20.1139	0	40.1053	33.3326	37.2895	22.1305	24.3484	11.1003	18.5102	22.8566	16.1402	74.5729	-1.95163	0.00180882	-1.95344	BAZ1A	-	-
chr14:73572516-73572795:mpeak_26907|chr14_73525220_73586420_RBM25_NM_+|	125.632	-0.816335	0.415358	-1.96538	0.0493707	0.168801	68.0938	127.035	69.1633	200.527	146.663	155.28	120.866	132.328	105.026	107.976	130.473	144.149	73.7792	-0.926904	-0.0949823	-0.831922	RBM25	chr14:73572695:+	chr14_73106010_+;chr14_73106070_+
chr19:49663111-49663267:mpeak_44658|chr19_49661015_49714750_TRPM4_NM_+|	31.1353	-1.90321	0.882557	-2.15648	0.0310465	0.123485	15.3211	6.35176	55.5014	44.2187	51.4274	45.6379	45.9633	26.4657	32.447	14.3968	24.7614	11.1312	73.5862	-0.872408	1.06036	-1.93277	TRPM4	chr19:49663179:+	chr19_49159921_+
chr6:160170300-160170456:mpeak_76312|chr6_160148029_160176059_WTAP_NM_+|	185.452	-1.81587	0.431546	-4.20782	2.57845e-05	0.00137063	83.4149	184.201	127.226	292.049	369.516	268.819	146.402	170.439	223.713	106.948	121.902	130.792	73.044	-1.23655	0.58788	-1.82443	WTAP	chr6:160170356:+;chr6:160170451:+	chr6_159749303_+;chr6_159749318_+;chr6_159749367_+;chr6_159749386_+;chr6_159749423_+;chr6_159749463_+
chr14:20923693-20923872:mpeak_24879|chr14_20923289_20925149_APEX1_NM_+|	181.994	-1.45682	0.546132	-2.66752	0.00764143	0.0496811	211.091	116.449	258.722	205.668	160.949	161.402	415.372	167.263	223.713	79.1823	102.855	81.2578	72.7057	0.150953	1.61472	-1.46377	APEX1	-	chr14_20455587_+;chr14_20455660_+;chr14_20455676_+
chrX:122755130-122755445:mpeak_90229|chrX_122735189_122866904_THOC2_NM_-|	37.2094	-2.15271	0.865154	-2.48824	0.0128377	0.0699123	13.6188	35.9933	3.41547	53.4738	110.474	80.1447	22.1305	31.7588	19.639	20.5668	21.9043	33.3936	72.1186	-2.20261	-0.0451307	-2.15748	THOC2	-	chrX_123621295_-;chrX_123621325_-
chr14:60622704-60622859:mpeak_26327|chr14_60611731_60632211_DHRS7_NM_-|	145.015	-1.46872	0.32632	-4.50086	6.76784e-06	0.000562191	146.402	123.859	105.026	198.47	151.425	207.04	188.96	147.149	187.851	89.4657	103.807	90.7193	71.625	-0.569517	0.883606	-1.45312	DHRS7	-	-
chr10:11798152-11798297:mpeak_9501|chr10_11784355_11805222_ECHDC3_NM_+|	19.5411	-1.85256	0.783762	-2.36367	0.0180949	0.0863123	20.4281	16.938	23.0544	15.4251	18.0948	27.828	28.9399	10.5863	47.8166	8.22673	10.476	6.67872	69.1765	-0.0219755	1.78291	-1.80489	ECHDC3	chr10:11798202:+;chr10:11798287:+;chr10:11798326:+	chr10_11756288_+
chr6:25285020-25285128:mpeak_72484|chr6_25279655_25619674_LRRC16A_NM_+|	48.3813	-1.49889	0.722102	-2.07573	0.037919	0.141071	88.5219	27.5243	53.7936	26.7369	41.9038	35.0633	98.736	94.2178	59.7707	6.17005	24.7614	23.3755	67.2036	0.711703	2.21836	-1.50665	LRRC16A	-	-
chr6:43025628-43025821:mpeak_73694|chr6_43022224_43027283_MRPL2_NM_-|	27.0729	-1.52771	0.684488	-2.2319	0.0256216	0.107471	25.5352	19.0553	37.5702	31.8786	25.7137	22.2624	49.368	17.9967	55.5014	11.3118	11.4283	17.2534	66.8701	0.0410694	1.61925	-1.57818	MRPL2	chr6:43025630:-;chr6:43025678:-	chr6_43057876_-;chr6_43057940_-;chr6_43058027_-
chr2:95773920-95774163:mpeak_48311|chr2_95753326_95787754_MRPS5_NM_-|	236.972	-0.875882	0.285079	-3.07242	0.00212332	0.0216742	228.114	230.781	215.175	258.114	171.425	198.692	345.576	363.109	315.077	153.223	179.044	185.335	65.8424	0.101603	0.983968	-0.882365	MRPS5	chr2:95773920:-	chr2_95108365_-
chr1:28531768-28531864:mpeak_1418|chr1_28527881_28559542_DNAJC8_NM_-|	188.909	-0.722656	0.342124	-2.11226	0.034664	0.131736	151.509	146.091	143.45	199.498	179.996	205.927	183.853	299.592	203.22	148.081	198.091	207.597	64.2306	-0.408537	0.310322	-0.71886	DNAJC8	-	chr1_28205265_-
chr14:58817777-58818052:mpeak_26256|chr14_58765221_58838603_ARID4A_NM_+|	17.023	-2.01108	0.900251	-2.23391	0.0254891	0.107021	0	11.6449	5.97707	23.6519	42.8562	28.9411	20.4281	14.8208	5.97707	13.3684	23.809	12.8009	64.1172	-2.43736	-0.277749	-2.15961	ARID4A	-	chr14_58351120_+;chr14_58351190_+;chr14_58351307_+
chr16:75445733-75445858:mpeak_34426|chr16_75327940_75467387_CFDP1_NM_-|	176.468	-1.49924	0.33473	-4.47895	7.50115e-06	0.000592521	127.676	155.618	119.541	221.093	210.472	265.479	255.352	214.901	163.089	116.203	125.712	142.479	63.6048	-0.791059	0.7204	-1.51146	CFDP1	-	chr16_75411943_-
chr19:50879742-50879836:mpeak_44812|chr19_50879679_50885712_NR1H2_NM_+mpeak_44812|chr19_50879679_50885712_NR1H2_NM_+||	80.0572	-0.845337	0.356028	-2.37435	0.0175797	0.0850996	62.9868	63.5176	74.2865	80.2107	81.903	76.8053	115.759	95.2765	105.026	70.9556	50.4751	83.484	63.529	-0.250828	0.625182	-0.87601	NR1H2	-	-
chr1:24842419-24842479:mpeak_1141|chr1_24828840_24861582_RCAN3_NM_+|	22.4179	-2.12503	0.970718	-2.18913	0.0285875	0.116152	30.6422	2.11725	8.53867	41.1337	35.2373	41.742	30.6422	24.3484	10.2464	8.22673	19.9996	16.1402	63.3047	-1.51602	0.556219	-2.07224	RCAN3	-	-
chr12:108923919-108924104:mpeak_21430|chr12_108917411_108955165_SART3_NM_-|	396.249	-0.792116	0.349881	-2.26396	0.0235765	0.102225	391.539	420.275	459.381	271.482	291.422	207.597	604.332	575.893	830.813	185.102	289.517	227.633	63.2109	0.722316	1.51788	-0.795564	SART3	-	chr12_108530254_-
chr8:92081407-92082055:mpeak_82811|chr8_92075974_92082417_OTUD6B-AS1_NR_-|	98.2944	-2.79091	0.665875	-4.19134	2.77311e-05	0.00142051	8.51172	33.8761	34.1547	236.519	264.756	290.524	25.5352	29.6416	70.871	45.247	64.7605	75.1356	60.725	-3.3708	-0.554671	-2.81613	OTUD6B-AS1	-	chr8_91069375_-;chr8_91069625_-;chr8_91069717_-;chr8_91069753_-
chr1:43166438-43166619:mpeak_2178|chr1_43148065_43167651_YBX1_NM_+|	292.183	-1.43942	0.392442	-3.66787	0.000244581	0.0056007	250.245	244.543	183.581	405.167	300.946	328.927	524.322	279.478	344.109	193.328	249.518	202.031	59.0961	-0.609544	0.831909	-1.44145	YBX1	-	chr1_42700794_+;chr1_42700854_+;chr1_42700925_+;chr1_42700948_+;chr1_42700973_+
chr5:145562046-145562191:mpeak_70712|chr5_145493874_145562294_LARS_NM_-|	211.549	-1.11534	0.373527	-2.98597	0.00282679	0.0259133	236.626	177.849	177.604	183.045	143.806	190.9	400.051	377.93	239.937	117.231	139.997	153.611	58.1658	0.193532	1.30898	-1.11545	LARS	chr5:145562050:-	chr5_146182487_-
chr5:148891346-148891402:mpeak_70800|chr5_148876423_148931115_CSNK1A1_NM_-|	285.05	-0.923756	0.288082	-3.20658	0.00134324	0.0161069	154.913	229.722	191.266	280.737	358.087	331.153	303.017	357.816	333.862	266.341	327.612	286.072	57.8973	-0.752129	0.176712	-0.928841	CSNK1A1	-	-
chr3:42672747-42672816:mpeak_58623|chr3_42642146_42687379_NKTR_NM_+|	28.511	-1.55134	0.654633	-2.36979	0.0177984	0.0856186	17.0234	15.8794	16.2235	40.1053	46.6656	43.9683	34.0469	41.2865	10.2464	30.8503	21.9043	23.9321	57.4041	-1.41212	0.158295	-1.57042	NKTR	-	-
chr7:2634508-2634571:mpeak_76720|chr7_2598605_2649677_IQCE_NM_+|	224.784	-0.762255	0.34621	-2.20171	0.0276856	0.113693	125.974	176.791	205.782	224.178	218.09	196.466	291.101	242.426	361.186	201.555	202.853	251.009	56.8391	-0.328838	0.449013	-0.77785	IQCE	-	chr7_2594944_+
chr21:47819509-47819722:mpeak_55831|chr21_47744035_47865196_PCNT_NM_+|	123.383	-1.32356	0.518838	-2.55101	0.010741	0.0624797	161.723	152.442	64.8939	105.919	76.1888	71.7963	263.863	245.602	158.819	60.6722	61.9034	56.7691	56.7212	0.578138	1.89773	-1.31959	PCNT	-	chr21_46399683_+;chr21_46399752_+
chr8:71570046-71570127:mpeak_82433|chr8_71550138_71581447_LACTB2_NM_-|	16.6963	-1.76473	0.640891	-2.75355	0.00589522	0.0417892	8.51172	11.6449	5.97707	24.6802	31.4279	28.3846	18.7258	15.8794	11.9541	10.2834	16.1901	16.6968	56.1299	-1.69291	0.10903	-1.80194	LACTB2	-	-
chr11:43775611-43775674:mpeak_14418|chr11_43702142_43876693_HSD17B12_NM_+|	138.174	-1.17935	0.508845	-2.3177	0.0204659	0.0934003	44.261	47.6382	109.295	232.405	147.616	229.859	107.248	140.797	116.98	183.045	138.092	160.846	55.1179	-1.59994	-0.400987	-1.19895	HSD17B12	chr11:43775671:+	chr11_43754106_+
chr6:25600531-25600969:mpeak_72488|chr6_25279655_25619674_LRRC16A_NM_+|	45.3866	-1.68498	0.628638	-2.68037	0.00735416	0.0484847	59.5821	41.2865	38.424	43.1904	29.5232	25.6018	98.736	94.2178	59.7707	6.17005	24.7614	23.3755	55.1164	0.502631	2.21836	-1.71573	LRRC16A	-	-
chr14:24707068-24707197:mpeak_25217|chr14_24701627_24707794_GMPR2_NR_+mpeak_25217|chr14_24701627_24707451_GMPR2_NM_+||	5.60894	-2.99391	1.46162	-2.04835	0.0405254	0.147426	0	0	5.1232	5.14171	9.5236	6.12216	5.10703	3.17588	20.4928	3.08503	2.85708	6.67872	53.4117	-2.0206	1.18905	-3.20964	GMPR2	chr14:24707131:+	chr14_24237924_+
chr5:130846043-130846252:mpeak_69873|chr5_130762984_130970929_RAPGEF6_NM_-|	12.9233	-2.79782	1.20684	-2.3183	0.020433	0.0933711	10.2141	0	0	14.3968	19.9996	8.90496	28.9399	12.7035	16.2235	14.3968	20.9519	8.3484	52.9529	-2.08385	0.4052	-2.48905	RAPGEF6	-	-
chr3:185332388-185332534:mpeak_62545|chr3_185304030_185347569_SENP2_NM_+|	71.0727	-1.00213	0.408711	-2.45194	0.0142089	0.0742697	27.2375	47.6382	32.447	97.6925	85.7124	96.2849	49.368	86.8074	66.6017	78.154	91.4266	93.5021	52.9264	-1.38187	-0.375621	-1.00625	SENP2	-	chr3_185614652_+;chr3_185614695_+
chr17:72200261-72200337:mpeak_39382|chr17_72199794_72205942_RPL38_NM_+|	1955.53	-1.09288	0.370185	-2.95224	0.00315481	0.0278916	1147.38	712.456	1219.32	3205.34	2135.19	2221.23	1998.55	1739.32	2223.47	2017.61	2516.14	2330.32	51.6521	-1.29619	-0.203423	-1.09276	RPL38	chr17:72200328:+	-
chr11:63916078-63916268:mpeak_15159|chr11_63766159_63933585_MACROD1_NM_-|	53.287	-1.59895	0.452702	-3.53201	0.000412411	0.0076947	49.368	45.521	34.1547	43.1904	50.4751	56.2126	68.0938	105.863	84.5329	25.7085	45.7133	30.6108	49.9222	-0.215929	1.34107	-1.557	MACROD1	chr11:63916090:-;chr11:63916168:-;chr11:63916216:-	chr11_64148745_-
chr12:99047763-99047814:mpeak_21064|chr12_99039077_99126197_APAF1_NM_+|	10.2709	-2.07082	0.992451	-2.08657	0.0369266	0.138038	10.2141	6.35176	0	7.19839	8.57124	15.5837	15.3211	14.8208	19.639	6.17005	10.476	8.90496	49.9163	-0.920407	0.962212	-1.88262	APAF1	chr12:99047816:+	chr12_98654036_+
chr17:57163551-57163668:mpeak_38391|chr17_57060282_57184266_TRIM37_NM_-|	69.6588	-1.17001	0.501532	-2.33287	0.0196551	0.0907788	32.3446	46.5796	18.7851	77.1256	112.378	92.9456	78.3079	75.1625	46.1088	77.1256	93.3313	85.7103	48.9576	-1.53143	-0.360124	-1.1713	TRIM37	-	-
chr15:44852449-44852586:mpeak_29041|chr15_44829265_44853215_EIF3J_NM_+|	190.305	-0.886393	0.41207	-2.15107	0.0314703	0.124526	90.2243	64.5763	33.3008	277.652	250.471	269.375	122.569	130.211	133.203	329.069	275.232	307.778	48.733	-2.08397	-1.24062	-0.84335	EIF3J	-	chr15_44560300_+
chr16:3181662-3181727:mpeak_31688|chr16_3175967_3184883_ZNF213-AS1_NR_-|	7.77957	-3.10109	1.08858	-2.84875	0.00438916	0.0344769	6.80938	3.17588	4.26934	22.6235	7.61888	8.90496	5.10703	11.6449	12.808	2.05668	6.66652	1.66968	48.2227	-1.45749	1.50805	-2.96554	ZNF213-AS1	chr16:3181669:-	chr16_3131656_-
chr12:56997298-56997492:mpeak_19866|chr12_56992567_57030163_BAZ2A_NM_-|	234.34	-0.652523	0.309732	-2.10674	0.0351404	0.133008	211.091	223.37	202.367	141.911	131.426	96.2849	514.108	413.923	393.633	153.223	183.806	146.932	48.1838	0.784853	1.4494	-0.664542	BAZ2A	-	-
chr17:34868906-34869093:mpeak_37014|chr17_34852250_34891305_MYO19_NM_-|	115.833	-0.81437	0.338853	-2.40332	0.0162471	0.0806345	62.9868	91.042	79.4097	100.777	121.902	77.9184	158.318	161.97	176.751	121.344	125.712	111.869	46.9658	-0.364794	0.469678	-0.834471	MYO19	chr17:34868903:-;chr17:34868929:-	chr17_36513089_-
chr17:19835110-19835160:mpeak_36425|chr17_19809545_19881169_AKAP10_NM_-|	30.6242	-1.62269	0.604393	-2.68483	0.00725662	0.0479538	11.9164	12.7035	7.68481	67.8706	40.9515	46.7511	17.0234	34.9347	17.0773	39.077	31.4279	40.0723	46.7944	-2.26777	-0.679644	-1.58813	AKAP10	-	-
chr16:89383338-89383405:mpeak_35006|chr16_89353521_89556969_ANKRD11_NR_-mpeak_35006|chr16_89335071_89556969_ANKRD11_NM_-||	87.0883	-1.45481	0.469582	-3.0981	0.00194765	0.0204746	49.368	43.4037	28.1776	166.591	84.7601	111.312	71.4985	101.628	92.2177	83.2957	107.617	105.19	45.582	-1.58423	-0.158229	-1.426	ANKRD11	-	-
chr16:27499538-27499705:mpeak_32800|chr16_27472883_27561251_GTF3C1_NM_-|	849.919	-1.11075	0.369558	-3.00561	0.00265051	0.0249189	1186.53	731.511	767.627	293.077	217.138	272.158	2383.28	1871.65	1674.43	243.717	315.231	242.66	45.2944	1.77935	2.88691	-1.10756	GTF3C1	-	-
chr20:270064-270126:mpeak_52373|chr20_251908_271419_C20orf96_NM_-|	20.1489	-1.5512	0.725159	-2.13911	0.0324265	0.126825	0	9.52765	9.39254	17.4818	38.0944	24.4887	23.8328	20.1139	18.7851	20.5668	26.6661	32.8371	45.2406	-2.08124	-0.352064	-1.72918	C20orf96	chr20:270069:-	chr20_289433_-
chr1:155753475-155753545:mpeak_5998|chr1_155720524_155829191_GON4L_NM_-|	24.7962	-2.30885	0.567389	-4.06926	4.71628e-05	0.00212032	10.2141	11.6449	13.6619	51.4171	35.2373	41.1855	32.3446	29.6416	17.0773	17.4818	20.9519	16.6968	44.927	-1.8476	0.520159	-2.36776	GON4L	-	-
chr1:114254596-114254741:mpeak_4263|chr1_114240347_114301777_PHTF1_NM_-|	9.37408	-2.88954	0.998916	-2.89268	0.00381975	0.0313049	3.40469	8.46902	1.70773	14.3968	16.1901	21.7059	10.2141	15.8794	4.26934	7.19839	5.71416	3.33936	44.7305	-1.94497	0.901696	-2.84667	PHTF1	-	-
chr4:26417092-26417246:mpeak_63834|chr4_26321331_26432313_RBPJ_NM_+|	79.061	-0.93998	0.399382	-2.35359	0.0185933	0.0877444	30.6422	34.9347	30.7392	86.3807	91.4266	116.878	73.2008	81.5143	60.6246	87.409	131.426	123.556	44.7275	-1.61332	-0.669031	-0.944293	RBPJ	-	chr4_26415486_+
chr10:103921321-103921423:mpeak_12325|chr10_103911932_103921867_NOLC1_NM_+|	594.333	-0.782971	0.380854	-2.05583	0.0397986	0.145808	510.703	375.813	633.57	361.976	259.994	321.692	1135.46	875.485	1419.13	460.697	412.372	365.104	44.3164	0.68781	1.47003	-0.782218	NOLC1	-	chr10_102161638_+
chr13:114150050-114150348:mpeak_24753|chr13_114145307_114203739_TMCO3_NM_+|	46.426	-2.1696	0.721284	-3.00796	0.00263004	0.024837	51.0703	12.7035	36.7163	59.6438	33.3326	56.7691	110.652	44.4623	74.2865	28.7936	31.4279	17.2534	43.8054	-0.575459	1.56607	-2.14153	TMCO3	-	-
chr20:25367658-25367744:mpeak_53030|chr20_25275666_25371618_ABHD12_NM_-|	35.1479	-1.41281	0.714661	-1.9769	0.048053	0.165364	11.9164	14.8208	23.9083	34.9636	55.2369	46.1945	22.1305	27.5243	67.4555	22.6235	50.4751	44.5248	43.246	-1.42929	-0.00630724	-1.42298	ABHD12	chr20:25367688:-	chr20_25387055_-
chr4:13627154-13627317:mpeak_63631|chr4_13571752_13629328_BOD1L1_NM_-|	23.3741	-1.8198	0.707748	-2.57126	0.0101329	0.060185	22.1305	9.52765	15.3696	27.7652	26.6661	20.0362	34.0469	56.1072	18.7851	14.3968	22.8566	12.8009	43.1688	-0.663098	1.12196	-1.78506	BOD1L1	chr4:13627160:-;chr4:13627265:-	chr4_13625536_-
chr9:2838329-2838528:mpeak_84667|chr9_2804463_2844130_KIAA0020_NM_-|	183.96	-1.32537	0.482309	-2.74796	0.00599671	0.0422721	47.6657	69.8694	32.447	319.814	236.185	327.814	80.0102	166.204	101.61	258.114	296.184	271.601	43.12	-2.55895	-1.2476	-1.31135	KIAA0020	-	-
chr11:134092969-134093110:mpeak_17481|chr11_134022947_134094426_NCAPD3_NM_-|	26.9375	-2.22032	0.765893	-2.89899	0.00374364	0.0310078	11.9164	24.3484	19.639	29.8219	19.9996	42.8551	71.4985	19.0553	39.2779	9.25508	19.9996	15.5837	43.0587	-0.729259	1.53384	-2.2631	NCAPD3	chr11:134092971:-;chr11:134092999:-	chr11_134223057_-;chr11_134223099_-
chr5:177632826-177632990:mpeak_71574|chr5_177631507_177637553_HNRNPAB_NM_+mpeak_71574|chr5_177631507_177637553_HNRNPAB_NM_+||	1035.95	-1.44449	0.352916	-4.09301	4.25813e-05	0.00196665	909.052	666.935	834.228	972.811	678.08	712.954	2427.54	1548.77	1653.09	649.912	761.888	616.112	42.8148	0.0280267	1.47299	-1.44496	HNRNPAB	-	chr5_178205889_+;chr5_178205955_+
chr4:83278460-83278583:mpeak_64877|chr4_83275307_83295149_HNRNPD_NM_-mpeak_64877|chr4_83275307_83295149_HNRNPD_NM_-||	1277.41	-0.587904	0.259024	-2.26968	0.0232268	0.101241	1072.48	826.788	1053.67	740.406	587.606	778.628	2168.79	2300.4	2491.59	987.208	1180.93	1140.39	42.4226	0.487207	1.07306	-0.585851	HNRNPD	chr4:83278517:-	-
chr1:11313887-11314037:mpeak_561|chr1_11167557_11322608_MTOR_NM_-|	167.354	-1.26486	0.423012	-2.99013	0.00278856	0.0257303	160.02	156.677	145.157	68.8989	79.9983	56.2126	381.325	506.024	245.914	59.6438	77.1412	71.2397	40.7544	1.17104	2.44566	-1.27461	MTOR	-	chr1_11253834_-
chr14:20924051-20924248:mpeak_24880|chr14_20923289_20925149_APEX1_NM_+|	138.003	-1.259	0.534162	-2.35697	0.0184248	0.0871931	90.2243	86.8074	151.135	87.409	69.5223	101.294	415.372	167.263	223.713	79.1823	102.855	81.2578	40.6978	0.345796	1.61472	-1.26893	APEX1	chr14:20924115:+	chr14_20455933_+;chr14_20455957_+;chr14_20456099_+
chr10:112343858-112344133:mpeak_12574|chr10_112327448_112363988_SMC3_NM_+|	75.7021	-2.15431	0.681953	-3.15903	0.00158293	0.0179102	20.4281	45.521	14.5157	138.826	123.807	141.923	61.2844	103.745	34.1547	55.5305	101.903	66.7872	40.3971	-2.32991	-0.17081	-2.1591	SMC3	chr10:112343915:+	chr10_110584156_+;chr10_110584202_+;chr10_110584360_+;chr10_110584375_+
chr12:101748751-101748899:mpeak_21147|chr12_101673904_101779745_UTP20_NM_+|	36.5721	-1.40552	0.703605	-1.9976	0.0457598	0.16015	52.7727	16.938	15.3696	26.7369	16.1901	29.4977	85.1172	80.4557	45.255	19.5385	27.6184	23.3755	40.3554	0.232344	1.57971	-1.34736	UTP20	chr12:101748922:+	chr12_101355143_+
chr3:119236053-119236169:mpeak_60343|chr3_119217367_119242452_TIMMDC1_NM_+|	400.289	-1.06398	0.405853	-2.62158	0.00875231	0.0542733	270.673	248.777	210.905	414.422	348.564	268.262	633.272	401.22	781.289	358.891	395.229	471.963	40.2227	-0.49772	0.566532	-1.06425	TIMMDC1	chr3:119236163:+	chr3_119517282_+
chr7:33354133-33354286:mpeak_77567|chr7_33169151_33644806_BBS9_NM_+|	4.92615	-2.96624	1.39068	-2.13294	0.0329299	0.128142	3.40469	3.17588	0	6.17005	7.61888	4.45248	3.40469	8.46902	12.808	0	5.71416	3.89592	39.9926	-1.47093	1.36082	-2.83175	BBS9	chr7:33354190:+	chr7_33314577_+;chr7_33314674_+
chr4:106630130-106630182:mpeak_65487|chr4_106629940_106766597_GSTCD_NM_+|	91.7946	-1.18021	0.368903	-3.19925	0.00137786	0.0162974	34.0469	53.99	32.447	105.919	112.378	101.294	78.3079	105.863	119.541	120.316	119.997	117.434	39.6704	-1.40739	-0.236238	-1.17115	GSTCD	-	-
chr2:212638503-212638695:mpeak_51389|chr2_212248785_213403352_ERBB4_NM_-|	10.6054	-2.76986	1.13472	-2.44101	0.0146461	0.0760374	0	3.17588	0	16.4535	16.1901	13.3574	3.40469	9.52765	11.9541	24.6802	12.3807	16.1402	38.2844	-3.85644	-1.09609	-2.76034	ERBB4	-	chr2_211773812_-
chr16:85113306-85113438:mpeak_34740|chr16_85061356_85121881_KIAA0513_NM_+|	98.964	-1.24724	0.380362	-3.27908	0.00104145	0.0137108	40.8563	61.4004	70.0171	93.5791	78.0935	99.6243	122.569	152.442	175.043	93.5791	85.7124	114.651	38.2785	-0.655169	0.614562	-1.26973	KIAA0513	chr16:85113360:+;chr16:85113425:+	chr16_85079773_+;chr16_85079832_+
chr17:35979804-35979887:mpeak_37103|chr17_35974398_36003493_DDX52_NM_-|	43.2515	-1.26785	0.504237	-2.5144	0.0119235	0.0666519	15.3211	27.5243	11.9541	50.3887	42.8562	60.1085	42.5586	61.4004	39.2779	51.4171	59.9987	56.2126	38.258	-1.48462	-0.226863	-1.25776	DDX52	-	chr17_37619771_-
chr5:140080386-140080498:mpeak_70473|chr5_140080031_140085197_ZMAT2_NM_+|	1238.37	-0.894118	0.290615	-3.07664	0.00209345	0.0214731	478.359	581.186	780.435	1008.8	1135.21	1269.51	1676.81	1457.73	1680.41	1538.4	1645.68	1607.9	38.2139	-0.891574	0.00689906	-0.898474	ZMAT2	chr5:140080498:+	-
chr11:3733051-3733161:mpeak_13535|chr11_3697606_3819022_NUP98_NM_-|	116.127	-1.65899	0.482982	-3.43489	0.000592796	0.00970991	95.3313	141.856	72.5787	42.162	53.3322	51.7601	297.91	297.474	219.444	24.6802	48.5704	48.4207	38.0161	1.07287	2.74351	-1.67064	NUP98	chr11:3733065:-;chr11:3733107:-	chr11_3711825_-
chr7:129837731-129837859:mpeak_79991|chr7_129806345_129845338_TMEM209_NM_-|	32.6365	-2.11855	0.804032	-2.63491	0.00841593	0.0527453	11.9164	26.4657	2.5616	35.992	46.6656	65.6741	37.4516	47.6382	24.7622	26.7369	32.3802	33.3936	37.2717	-1.85711	0.247868	-2.10498	TMEM209	chr7:129837744:-;chr7:129837807:-	chr7_130197884_-;chr7_130197918_-;chr7_130197962_-
chr1:36216806-36217071:mpeak_1797|chr1_36202207_36235551_CLSPN_NM_-|	41.9466	-1.62134	0.73696	-2.20004	0.0278044	0.113693	0	25.4071	14.5157	45.247	42.8562	46.1945	62.9868	56.1072	42.6934	77.1256	52.3798	37.8461	37.0141	-1.75015	-0.0487827	-1.70137	CLSPN	-	chr1_35751348_-
chr21:22881249-22881386:mpeak_54944|chr21_22370632_22910166_NCAM2_NM_+|	54.5956	-1.46758	0.493851	-2.9717	0.00296157	0.0268287	28.9399	27.5243	15.3696	77.1256	48.5704	65.6741	64.6891	71.9867	59.7707	66.8422	81.903	46.7511	36.5666	-1.41363	0.00699543	-1.42063	NCAM2	chr21:22881377:+	chr21_21509036_+
chr1:207958955-207959058:mpeak_7929|chr1_207925382_207966863_CD46_NM_+|	111.584	-0.931752	0.423231	-2.20152	0.0276992	0.113693	90.2243	55.0486	39.2779	98.7208	72.3794	91.2759	166.83	189.494	148.573	122.373	145.711	119.104	36.5522	-0.507618	0.382956	-0.890574	CD46	chr1:207959052:+	chr1_207785663_+;chr1_207785705_+
chr17:65905688-65905874:mpeak_39195|chr17_65821779_65978367_BPTF_NM_+|	94.8792	-2.04564	0.95526	-2.14145	0.032238	0.126439	0	56.1072	29.0315	124.429	75.2365	156.95	158.318	115.39	75.9942	102.834	125.712	118.547	36.5191	-2.06648	0.0108063	-2.07729	BPTF	-	chr17_67909607_+;chr17_67909758_+
chr1:150667072-150667331:mpeak_5432|chr1_150621224_150669672_GOLPH3L_NM_-|	168.696	-0.861848	0.354417	-2.43173	0.0150268	0.0770681	117.462	82.5729	63.1862	117.231	144.759	145.262	219.602	272.067	232.252	184.073	217.138	228.746	36.3604	-0.629647	0.200579	-0.830226	GOLPH3L	-	-
chr4:1345497-1345620:mpeak_63199|chr4_1341103_1379655_UVSSA_NM_+|	36.5417	-1.43323	0.721814	-1.9856	0.0470778	0.163409	23.8328	35.9933	20.4928	21.5952	17.1425	25.6018	71.4985	43.4037	110.149	34.9636	23.809	10.0181	35.6892	0.320038	1.70997	-1.38993	UVSSA	-	chr4_1351749_+;chr4_1351769_+
chr2:27606828-27606970:mpeak_46342|chr2_27604672_27632550_PPM1G_NM_-|	1426.26	-0.939839	0.347954	-2.70104	0.00691223	0.0462566	747.329	769.622	1195.41	902.884	982.836	853.207	2124.53	2346.98	3173.83	1182.59	1373.3	1462.64	35.4774	-0.0140588	0.927908	-0.941967	PPM1G	chr2:27606843:-;chr2:27606895:-	chr2_27383961_-;chr2_27383990_-;chr2_27384041_-;chr2_27384083_-
chr16:30425468-30425532:mpeak_33057|chr16_30418734_30428875_ZNF771_NM_+|	23.5634	-1.38508	0.61363	-2.2572	0.0239957	0.103311	3.40469	17.9967	11.1003	17.4818	29.5232	29.4977	34.0469	24.3484	35.0086	26.7369	28.5708	25.0452	34.7969	-1.235	0.217133	-1.45213	ZNF771	chr16:30425525:+	chr16_30414203_+
chr1:36208746-36208854:mpeak_1795|chr1_36202207_36235551_CLSPN_NM_-|	44.5662	-1.38167	0.569219	-2.4273	0.0152116	0.0776362	17.0234	25.4071	13.6619	47.3037	37.142	65.1176	62.9868	56.1072	42.6934	77.1256	52.3798	37.8461	34.6704	-1.41488	-0.0487827	-1.3661	CLSPN	-	-
chr1:45452159-45452211:mpeak_2314|chr1_45316675_45452394_EIF2B3_NM_-|	52.1219	-1.52495	0.682228	-2.23525	0.0254011	0.106863	25.5352	29.6416	38.424	83.2957	20.9519	25.6018	97.0337	84.6902	91.3638	34.9636	53.3322	40.6289	34.275	-0.472247	1.08284	-1.55508	EIF2B3	-	-
chr12:122812575-122812965:mpeak_22272|chr12_122757647_122907116_CLIP1_NM_-|	49.7538	-2.31414	0.492125	-4.70235	2.5719e-06	0.000293752	11.9164	15.8794	9.39254	106.948	88.5695	85.7103	23.8328	50.8141	34.1547	57.5871	57.1416	55.0995	34.18	-2.91881	-0.642376	-2.27644	CLIP1	chr12:122812807:-	-
chr4:4422605-4422681:mpeak_63438|chr4_4421856_4543775_STX18_NM_-|	14.2741	-1.77238	0.881712	-2.01016	0.0444144	0.157117	11.9164	4.23451	10.2464	12.3401	18.0948	5.5656	15.3211	24.3484	37.5702	8.22673	16.1901	7.23528	34.1759	-0.447627	1.28704	-1.73467	STX18	-	-
chr12:62708589-62708704:mpeak_20055|chr12_62654120_62797972_USP15_NM_+|	43.8594	-1.3708	0.517538	-2.64869	0.00808046	0.0512349	10.2141	22.2312	16.2235	61.7005	47.618	50.0904	54.475	52.9314	36.7163	39.077	70.4747	64.561	33.769	-1.71167	-0.272723	-1.43894	USP15	chr12:62708697:+	-
chr6:76599774-76599990:mpeak_74279|chr6_76458892_76624529_MYO6_NM_+|	128.047	-1.67406	0.530016	-3.1585	0.00158582	0.017919	40.8563	49.7555	20.4928	186.13	183.806	190.344	85.1172	165.146	81.9713	140.883	216.186	175.873	33.4416	-2.33423	-0.681776	-1.65245	MYO6	chr6:76599983:+	chr6_75890107_+;chr6_75890156_+;chr6_75890255_+
chr14:35233906-35234110:mpeak_25453|chr14_35222910_35344853_BAZ1A_NM_-|	16.0603	-2.56207	0.872159	-2.93762	0.00330747	0.0287601	8.51172	4.23451	0	18.5102	28.5708	17.8099	22.1305	24.3484	11.1003	18.5102	22.8566	16.1402	33.2053	-2.34794	0.00180882	-2.34975	BAZ1A	-	-
chr1:147093001-147093174:mpeak_5066|chr1_147013270_147095642_BCL9_NM_+|	55.983	-1.2819	0.458017	-2.79879	0.00512937	0.0380004	22.1305	29.6416	34.1547	53.4738	57.1416	37.2895	78.3079	69.8694	111.003	65.8139	49.5227	63.4479	33.1533	-0.783491	0.535733	-1.31922	BCL9	chr1:147093079:+;chr1:147093167:+	chr1_147621366_+
chr3:112260650-112260746:mpeak_60191|chr3_112253184_112280810_ATG3_NM_-|	62.9438	-1.09461	0.495035	-2.21118	0.0270234	0.111797	27.2375	35.9933	41.8395	41.1337	34.285	61.7782	115.759	97.3937	105.026	60.6722	88.5695	45.6379	33.0224	-0.384891	0.707255	-1.09215	ATG3	chr3:112260650:-	-
chr17:65899892-65900040:mpeak_39192|chr17_65821779_65978367_BPTF_NM_+|	139.116	-2.87501	0.574697	-5.00266	5.6544e-07	0.000106202	20.4281	66.6935	28.1776	224.178	311.422	321.692	158.318	115.39	75.9942	102.834	125.712	118.547	32.9707	-2.8944	0.0108063	-2.90521	BPTF	-	chr17_67903806_+;chr17_67903826_+
chr5:32588625-32588764:mpeak_67487|chr5_32585604_32601110_SUB1_NM_+|	871.846	-0.922302	0.25993	-3.54827	0.000387773	0.00741853	340.469	298.533	327.031	988.236	762.84	770.279	909.052	996.168	1027.2	1133.23	1497.11	1411.99	32.9432	-1.38406	-0.463096	-0.920959	SUB1	-	chr5_32588578_+
chr10:112343134-112343317:mpeak_12572|chr10_112327448_112363988_SMC3_NM_+|	61.7035	-1.78661	0.65408	-2.73148	0.0063051	0.0435382	22.1305	29.6416	13.6619	77.1256	67.6176	106.86	61.2844	103.745	34.1547	55.5305	101.903	66.7872	32.8509	-1.94304	-0.17081	-1.77223	SMC3	-	chr10_110583396_+;chr10_110583428_+;chr10_110583516_+
chr14:24661815-24662154:mpeak_25190|chr14_24659014_24664942_TM9SF1_NM_-|	227.685	-1.59189	0.293352	-5.42655	5.7455e-08	2.19011e-05	160.02	148.208	167.358	110.033	146.663	144.706	522.62	434.037	491.828	117.231	160.949	128.565	32.8334	0.24466	1.83235	-1.58769	TM9SF1	chr14:24661819:-;chr14:24661915:-;chr14:24661947:-;chr14:24661998:-;chr14:24662033:-;chr14:24662099:-	chr14_24192610_-;chr14_24192710_-;chr14_24192871_-
chr7:135290890-135290984:mpeak_80133|chr7_135242661_135333151_NUP205_NM_+|	100.998	-1.751	0.703262	-2.48983	0.0127806	0.0698556	134.485	47.6382	48.6704	58.6155	43.8086	37.8461	394.944	169.38	146.865	53.4738	42.8562	33.3936	32.4518	0.718397	2.45479	-1.7364	NUP205	-	-
chr2:85785829-85786046:mpeak_48102|chr2_85777249_85788657_GGCX_NM_-|	169.937	-1.09109	0.408211	-2.67286	0.0075208	0.0490542	107.248	102.687	141.742	63.7572	107.617	75.1356	369.409	268.891	447.427	105.919	131.426	117.991	32.3909	0.512606	1.61141	-1.0988	GGCX	chr2:85785848:-;chr2:85785965:-	chr2_85558726_-;chr2_85558845_-
chr13:107219909-107220029:mpeak_24616|chr13_107196508_107220514_ARGLU1_NM_-|	103.226	-0.975504	0.473267	-2.06121	0.0392826	0.144328	64.6891	25.4071	40.1318	70.9556	79.9983	114.095	120.866	157.735	128.934	120.316	164.758	150.828	31.955	-1.02522	-0.0970769	-0.928142	ARGLU1	-	chr13_106567579_-
chr5:60186262-60186476:mpeak_68078|chr5_60170510_60240905_ERCC8_NM_-|	10.1935	-2.55516	1.01659	-2.51346	0.0119555	0.0667056	5.10703	4.23451	4.26934	12.3401	19.0472	11.1312	8.51172	4.23451	29.8854	7.19839	8.57124	7.79184	31.9267	-1.64333	0.855493	-2.49882	ERCC8	chr5:60186263:-;chr5:60186378:-;chr5:60186420:-	chr5_60890439_-;chr5_60890525_-;chr5_60890595_-
chr10:27328886-27329103:mpeak_9963|chr10_27294652_27389427_ANKRD26_NM_-|	10.3379	-3.05698	1.06002	-2.88388	0.00392805	0.0320153	3.40469	1.05863	5.1232	20.5668	16.1901	24.4887	5.10703	5.29314	19.639	3.08503	9.5236	10.5746	31.9135	-2.67553	0.373758	-3.04929	ANKRD26	-	chr10_27040148_-
chr12:72026171-72026299:mpeak_20484|chr12_72004345_72057749_ZFC3H1_NM_-|	10.9838	-2.67599	1.23	-2.17561	0.0295847	0.119151	3.40469	3.17588	0	11.3118	19.9996	19.4796	3.40469	21.1725	6.83094	5.14171	22.8566	15.0271	31.4277	-2.94829	-0.454051	-2.49423	ZFC3H1	-	chr12_71632490_-
chr16:69399997-69400246:mpeak_34010|chr16_69390959_69419891_TERF2_NM_-|	232.266	-1.07297	0.319424	-3.35906	0.000782071	0.011546	105.545	142.915	128.934	126.486	177.139	174.203	330.255	401.22	474.75	244.745	233.328	247.669	31.2872	-0.340421	0.732969	-1.07339	TERF2	chr16:69399998:-;chr16:69400089:-;chr16:69400195:-	chr16_69366095_-;chr16_69366143_-;chr16_69366195_-;chr16_69366293_-
chr1:70710407-70710515:mpeak_2998|chr1_70671364_70716290_SRSF11_NM_+|	200.157	-0.884288	0.360354	-2.45394	0.01413	0.0742242	66.3915	83.6316	81.1174	174.818	212.376	141.366	263.863	282.654	192.974	251.944	319.041	331.71	31.2567	-1.1933	-0.287705	-0.905595	SRSF11	chr1:70710494:+	chr1_70244776_+;chr1_70244826_+
chr18:18566932-18567075:mpeak_40508|chr18_18531348_18691812_ROCK1_NM_-|	115.167	-2.24403	0.771451	-2.90884	0.00362776	0.0303583	10.2141	29.6416	11.1003	243.717	169.52	279.95	25.5352	109.039	30.7392	158.365	146.663	167.525	30.8239	-3.76592	-1.51527	-2.25065	ROCK1	-	-
chr10:100162156-100162290:mpeak_12077|chr10_100143625_100174978_PYROXD2_NM_-|	11.0624	-2.01123	0.948538	-2.12035	0.0339766	0.130323	8.51172	4.23451	6.83094	13.3684	7.61888	6.12216	11.9164	17.9967	34.1547	2.05668	10.476	9.46152	30.557	-0.469625	1.54248	-2.0121	PYROXD2	chr10:100162154:-;chr10:100162184:-;chr10:100162210:-	chr10_98402417_-
chr9:115392062-115392137:mpeak_86822|chr9_115249247_115421542_KIAA1958_NM_+|	34.5473	-1.23119	0.622686	-1.97722	0.0480165	0.165364	10.2141	6.35176	8.53867	53.4738	29.5232	41.742	17.0234	33.8761	31.5931	78.154	42.8562	61.2216	30.4324	-2.31289	-1.14344	-1.16946	KIAA1958	chr9:115392117:+	chr9_112629783_+;chr9_112629835_+
chr8:30510959-30511130:mpeak_81581|chr8_30436554_30515738_GTF2E2_NM_-|	182.483	-1.40883	0.355143	-3.96694	7.28013e-05	0.00280967	71.4985	104.804	98.1948	143.968	150.473	159.176	223.007	298.533	380.825	165.563	202.853	190.9	30.4198	-0.724682	0.690048	-1.41473	GTF2E2	-	-
chr16:88787564-88787683:mpeak_34909|chr16_88782262_88851372_PIEZO1_NM_-|	365.128	-1.04232	0.402338	-2.59066	0.00957919	0.0578723	188.96	196.905	319.346	190.243	183.806	146.932	783.079	564.248	979.386	259.142	276.184	293.307	30.3093	0.436826	1.48949	-1.05266	PIEZO1	chr16:88787574:-	-
chr7:4905088-4905281:mpeak_76782|chr7_4839114_4923335_RADIL_NM_-|	16.5967	-1.71347	0.809179	-2.11754	0.0342139	0.130908	10.2141	6.35176	14.5157	12.3401	9.5236	9.46152	44.261	23.2898	36.7163	18.5102	9.5236	4.45248	29.8096	-0.0112651	1.68238	-1.69365	RADIL	-	-
chr16:30738581-30738709:mpeak_33129|chr16_30710461_30748369_SRCAP_NM_+|	36.562	-1.50371	0.704895	-2.13324	0.0329054	0.128105	37.4516	16.938	18.7851	26.7369	10.476	16.1402	91.9266	57.1659	97.3409	33.9353	19.0472	12.8009	29.6935	0.455773	1.9054	-1.44963	SRCAP	chr16:30738650:+;chr16:30738703:+	chr16_30727310_+;chr16_30727381_+
chr2:24516593-24516652:mpeak_46095|chr2_24426652_24583397_ITSN2_NM_-|	5.03249	-3.24101	1.63427	-1.98315	0.0473508	0.163967	1.70234	0	0	9.25508	5.71416	2.7828	10.2141	5.29314	1.70773	6.17005	11.4283	6.12216	29.6663	-3.38239	-0.462475	-2.91991	ITSN2	-	-
chr21:41160606-41160669:mpeak_55424|chr21_41117333_41173188_IGSF5_NM_+|	9.86379	-3.11872	1.33276	-2.34005	0.0192812	0.08969	6.80938	1.05863	0	3.08503	19.9996	17.8099	11.9164	17.9967	10.2464	4.11337	18.0948	7.23528	29.3879	-2.37784	0.447792	-2.82563	IGSF5	-	-
chr2:11338847-11338904:mpeak_45846|chr2_11323566_11484711_ROCK2_NM_-|	52.6655	-1.85957	0.679897	-2.73508	0.00623656	0.0434082	3.40469	5.29314	3.41547	119.288	91.4266	84.0406	6.80938	24.3484	10.2464	99.7491	97.1407	86.8234	29.2562	-4.60485	-2.77658	-1.82827	ROCK2	-	-
chr5:162898412-162898478:mpeak_71126|chr5_162887516_162918117_HMMR_NM_+|	19.8902	-2.00943	1.0128	-1.98403	0.0472523	0.163813	8.51172	4.23451	0.853867	38.0486	18.0948	33.3936	3.40469	27.5243	16.2235	19.5385	43.8086	25.0452	28.8428	-2.71887	-0.906587	-1.81228	HMMR	-	-
chr11:68660359-68660477:mpeak_15735|chr11_68658863_68671303_MRPL21_NM_-|	235.972	-0.827289	0.300241	-2.75541	0.00586178	0.0417415	117.462	85.7488	128.08	161.45	136.188	143.593	360.897	354.64	460.235	297.191	282.851	303.325	28.1764	-0.413432	0.412523	-0.825955	MRPL21	chr11:68660372:-	-
chr11:33162957-33163267:mpeak_14236|chr11_33106835_33183037_CSTF3_NM_-|	137.959	-1.23046	0.415526	-2.96122	0.0030642	0.027435	56.1774	110.097	55.5014	93.5791	92.3789	72.9094	257.054	233.957	296.292	113.118	138.092	136.357	28.1691	-0.22311	1.02247	-1.24558	CSTF3	chr11:33162977:-;chr11:33163048:-;chr11:33163201:-	chr11_33141432_-;chr11_33141488_-;chr11_33141542_-
chr12:113382641-113382808:mpeak_21757|chr12_113376237_113407766_OAS3_NM_+|	165.543	-1.61319	0.471376	-3.4223	0.000620944	0.00992102	54.475	142.915	87.0945	74.0406	115.236	120.774	355.79	327.116	344.962	111.061	142.854	110.199	27.6771	-0.124151	1.49719	-1.62135	OAS3	chr12:113382698:+;chr12:113382793:+	chr12_112944893_+;chr12_112944983_+
chr6:52132657-52132778:mpeak_73916|chr6_52129584_52149679_MCM3_NM_-|	578.986	-0.768098	0.367142	-2.0921	0.0364296	0.136724	354.088	316.53	472.189	191.272	157.139	168.638	1455.5	977.113	1747.87	347.579	364.754	395.158	27.3367	1.14421	1.91637	-0.772167	MCM3	chr6:52132663:-	chr6_52267865_-
chr1:150198934-150199130:mpeak_5337|chr1_150193063_150208504_ANP32E_NM_-|	345.635	-1.01725	0.35337	-2.87871	0.00399302	0.0323266	102.141	150.325	116.126	289.992	251.423	322.248	413.67	566.366	373.994	426.762	575.226	559.343	27.2218	-1.22845	-0.205517	-1.02293	ANP32E	chr1:150198943:-	chr1_150226691_-;chr1_150226742_-;chr1_150226778_-
chr17:35685578-35685692:mpeak_37072|chr17_35444374_35766902_ACACA_NM_-|	125.215	-1.22333	0.482069	-2.53766	0.0111596	0.0640269	64.6891	75.1625	82.8251	46.2754	64.7605	66.2307	352.385	318.647	152.842	93.5791	79.9983	105.19	27.028	0.329031	1.56336	-1.23433	ACACA	chr17:35685584:-	chr17_37328646_-;chr17_37328705_-
chr1:206629449-206629512:mpeak_7876|chr1_206516199_206634381_SRGAP2_NM_+|	77.6297	-0.879101	0.405979	-2.16539	0.030358	0.121432	42.5586	31.7588	44.4011	39.077	39.0468	43.9683	197.472	130.211	116.126	82.2673	82.8553	81.8144	26.7499	-0.0404235	0.845796	-0.88622	SRGAP2	chr1:206629505:+	chr1_206456119_+;chr1_206456158_+
chr1:100572922-100573055:mpeak_3645|chr1_100550990_100598651_SASS6_NM_-|	15.8255	-2.79833	0.868628	-3.22156	0.00127496	0.0155723	1.70234	2.11725	2.5616	39.077	31.4279	34.5067	8.51172	9.52765	5.97707	15.4251	25.7137	13.3574	26.5701	-4.04058	-1.18214	-2.85844	SASS6	-	chr1_100107446_-
chr13:42877947-42878005:mpeak_23663|chr13_42846288_42893223_AKAP11_NM_+|	61.2383	-1.63598	0.542525	-3.01549	0.00256563	0.0243923	15.3211	23.2898	16.2235	90.4941	62.8558	62.3348	88.5219	78.3384	40.9856	101.806	62.8558	91.8324	26.3822	-1.97577	-0.30341	-1.67236	AKAP11	-	-
chr16:31086402-31086597:mpeak_33201|chr16_31085742_31094291_ZNF646_NM_+|	48.1724	-1.78386	0.752225	-2.37144	0.017719	0.0853889	51.0703	10.5863	14.5157	35.992	36.1897	26.7149	125.974	51.8727	111.857	30.8503	45.7133	36.733	26.2933	-0.376652	1.35447	-1.73112	ZNF646	-	chr16_31075155_+;chr16_31075258_+
chr9:134008541-134008669:mpeak_87777|chr9_134000947_134108840_NUP214_NM_+|	246.006	-1.05908	0.412832	-2.56541	0.0103055	0.0606563	207.686	183.143	109.295	71.9839	54.2845	66.2307	684.343	721.984	498.659	102.834	138.092	113.538	26.2534	1.37743	2.42607	-1.04863	NUP214	chr9:134008550:+;chr9:134008596:+;chr9:134008675:+	chr9_131133209_+;chr9_131133288_+
chr2:20162652-20162704:mpeak_45988|chr2_20113469_20189884_WDR35_NM_-|	3.64596	-4.53662	1.53591	-2.95371	0.00313984	0.0278052	1.70234	0	2.5616	3.08503	4.7618	4.45248	10.2141	3.17588	11.1003	1.02834	0	1.66968	26.1162	-1.52832	3.18223	-4.71055	WDR35	-	chr2_19962855_-
chr16:74946008-74946085:mpeak_34403|chr16_74908342_75019017_WDR59_NM_-|	76.7581	-1.26631	0.406912	-3.112	0.00185827	0.0199569	39.1539	35.9933	51.232	31.8786	49.5227	38.9592	197.472	131.27	157.112	57.5871	61.9034	69.0135	26.0118	0.0703978	1.36593	-1.29553	WDR59	chr16:74946015:-	chr16_74912108_-
chr14:50262499-50262657:mpeak_25770|chr14_50251431_50319791_NEMF_NM_-|	52.2033	-2.0171	0.780292	-2.58506	0.00973615	0.0584861	10.2141	13.7622	5.97707	79.1823	69.5223	96.2849	47.6657	59.2831	9.39254	70.9556	79.0459	85.1537	25.746	-3.03193	-1.01525	-2.01668	NEMF	-	chr14_49795833_-
chr1:212791458-212791543:mpeak_8063|chr1_212738675_212792387_ATF3_NM_+|	25.1802	-1.22362	0.614395	-1.99159	0.0464157	0.161642	6.80938	12.7035	18.7851	12.3401	18.0948	13.914	51.0703	57.1659	40.9856	17.4818	33.3326	19.4796	25.6651	-0.211631	1.08598	-1.29762	ATF3	-	chr1_212618150_+;chr1_212618210_+
chr11:71171901-71171997:mpeak_15866|chr11_71164216_71212347_NADSYN1_NM_+|	70.7367	-1.53352	0.524894	-2.92158	0.00348263	0.0296619	27.2375	32.8174	25.616	39.077	51.4274	89.0496	95.3313	88.9247	151.988	76.0973	79.9983	91.2759	25.4788	-1.06754	0.442831	-1.51037	NADSYN1	chr11:71171993:+	chr11_71460942_+
chr14:35249287-35249526:mpeak_25458|chr14_35222910_35344853_BAZ1A_NM_-|	18.9695	-2.82885	0.748518	-3.77927	0.000157287	0.0043162	6.80938	5.29314	2.5616	37.0203	21.9043	38.9592	22.1305	24.3484	11.1003	18.5102	22.8566	16.1402	25.4677	-2.73878	0.00180882	-2.74059	BAZ1A	chr14:35249293:-;chr14:35249322:-	chr14_34780088_-;chr14_34780185_-;chr14_34780258_-
chr6:76550941-76551104:mpeak_74273|chr6_76458892_76624529_MYO6_NM_+|	107.105	-1.28241	0.504709	-2.54089	0.011057	0.0637476	18.7258	35.9933	29.8854	115.174	96.1884	124.113	85.1172	165.146	81.9713	140.883	216.186	175.873	25.4653	-1.9874	-0.681776	-1.30563	MYO6	-	chr6_75841278_+
chr22:36689361-36689512:mpeak_56741|chr22_36678831_36784112_MYH9_NM_-|	673.799	-1.30304	0.433379	-3.0067	0.00264098	0.0248778	571.988	380.047	299.707	291.021	247.614	189.23	2202.83	1391.04	1346.55	404.138	408.563	352.859	25.3368	0.782195	2.08361	-1.30141	MYH9	chr22:36689399:-	-
chr9:90342581-90342648:mpeak_85939|chr9_90340973_90345922_CTSL_NM_+|	183.271	-0.905824	0.329598	-2.74827	0.00599106	0.0422675	108.95	101.628	87.0945	84.324	77.1412	68.4569	374.516	355.699	452.55	131.628	198.091	159.176	25.1675	0.372582	1.27457	-0.901984	CTSL	chr9:90342644:+	chr9_87727709_+
chr10:115457310-115457367:mpeak_12658|chr10_115438920_115489069_CASP7_NM_+|	139.753	-1.25137	0.424631	-2.94697	0.00320907	0.0282532	76.6055	39.1692	41.8395	142.939	108.569	77.9184	207.686	221.253	198.951	185.102	186.663	190.344	25.1022	-1.06356	0.159666	-1.22323	CASP7	-	-
chr9:33029887-33029997:mpeak_85080|chr9_33025208_33038682_DNAJA1_NM_+|	327.554	-0.759225	0.312475	-2.42971	0.0151108	0.0773103	183.853	139.739	140.888	164.535	133.33	175.873	766.055	562.131	533.667	378.43	394.277	357.868	24.9472	-0.0284728	0.719683	-0.748155	DNAJA1	-	chr9_33029920_+;chr9_33029959_+
chr15:36910639-36910688:mpeak_28555|chr15_36871803_37100524_C15orf41_NM_+|	4.14196	-4.22422	1.58989	-2.65694	0.00788543	0.0504907	0	3.17588	0.853867	2.05668	3.80944	10.5746	15.3211	6.35176	2.5616	1.02834	2.85708	1.11312	24.9423	-2.02852	2.27748	-4.306	C15orf41	-	-
chr12:6879057-6879176:mpeak_17791|chr12_6875540_6879557_PTMS_NM_+|	263.892	-1.7026	0.314132	-5.42	5.95982e-08	2.19011e-05	91.9266	113.273	116.126	279.709	207.615	210.936	343.874	478.5	467.919	311.588	278.089	267.149	24.9033	-1.11973	0.590625	-1.71035	PTMS	chr12:6879126:+;chr12:6879165:+	chr12_6769929_+;chr12_6769993_+
chr6:44374048-44374168:mpeak_73830|chr6_44355250_44414343_CDC5L_NM_+|	35.9266	-1.1123	0.516539	-2.15338	0.0312888	0.124141	15.3211	20.1139	10.2464	28.7936	19.0472	22.2624	74.9032	63.5176	46.1088	42.162	48.5704	40.0723	24.7556	-0.617872	0.496438	-1.11431	CDC5L	-	chr6_44406334_+;chr6_44406360_+
chr10:128821460-128821522:mpeak_13166|chr10_128593977_129249595_DOCK1_NM_+|	10.2641	-3.09087	1.21434	-2.5453	0.0109184	0.0631207	6.80938	1.05863	5.1232	24.6802	15.2378	16.1402	0	23.2898	11.9541	8.22673	2.85708	7.79184	24.5739	-2.10939	0.900848	-3.01024	DOCK1	-	chr10_127023208_+
chr4:39329238-39329388:mpeak_63994|chr4_39290464_39368001_RFC1_NM_-|	124.415	-1.08118	0.483817	-2.23468	0.0254383	0.106914	47.6657	45.521	24.7622	117.231	76.1888	107.973	129.378	181.025	170.773	134.713	209.519	248.226	24.5126	-1.35348	-0.300145	-1.05334	RFC1	-	-
chr1:244580962-244581061:mpeak_8984|chr1_244572940_244615436_ADSS_NM_-|	95.0193	-0.982982	0.452815	-2.17082	0.0299444	0.120176	42.5586	51.8727	33.3008	43.1904	42.8562	71.2397	212.793	156.677	155.404	84.324	121.902	124.113	24.3358	-0.300271	0.668023	-0.968294	ADSS	-	-
chr8:25181412-25181478:mpeak_81364|chr8_25042286_25268709_DOCK5_NM_+|	24.694	-1.5708	0.696993	-2.25368	0.0242163	0.103791	3.40469	14.8208	14.5157	13.3684	19.0472	22.819	44.261	62.459	28.1776	21.5952	32.3802	19.4796	24.2712	-0.754465	0.876932	-1.6314	DOCK5	-	-
chr11:440485-440557:mpeak_13359|chr11_418589_442011_ANO9_NM_-|	8.9119	-2.28321	1.01873	-2.24123	0.0250111	0.105856	1.70234	3.17588	5.1232	10.2834	7.61888	12.2443	11.9164	10.5863	18.7851	16.4535	5.71416	3.33936	24.2237	-1.59179	0.694822	-2.28661	ANO9	-	-
chr6:151220081-151220157:mpeak_75928|chr6_151186814_151422661_MTHFD1L_NM_+|	123.333	-1.1377	0.403334	-2.82074	0.00479132	0.036615	74.9032	70.928	70.871	35.992	35.2373	51.2035	340.469	210.667	353.501	76.0973	86.6648	73.466	23.9546	0.823723	1.93716	-1.11344	MTHFD1L	chr6:151220136:+	chr6_150898996_+
chr3:112262900-112262965:mpeak_60192|chr3_112253184_112280810_ATG3_NM_-|	63.6377	-1.94516	0.479177	-4.05938	4.92027e-05	0.00217626	32.3446	23.2898	20.4928	71.9839	45.7133	56.7691	115.759	97.3937	105.026	60.6722	88.5695	45.6379	23.9259	-1.19647	0.707255	-1.90372	ATG3	-	-
chr16:80718422-80718632:mpeak_34545|chr16_80638443_80838175_CDYL2_NM_-|	30.5719	-1.54316	0.588471	-2.62232	0.00873323	0.0542346	17.0234	10.5863	17.0773	15.4251	18.0948	18.3665	44.261	58.2245	88.8022	24.6802	34.285	20.0362	23.3612	-0.215501	1.27579	-1.4913	CDYL2	-	-
chr14:92480551-92480925:mpeak_27591|chr14_92436237_92506403_TRIP11_NM_-|	39.5352	-1.91977	0.570441	-3.36542	0.000764274	0.011395	8.51172	13.7622	8.53867	56.5588	33.3326	57.3257	47.6657	51.8727	32.447	41.1337	67.6176	55.656	23.3454	-2.25636	-0.316896	-1.93946	TRIP11	-	chr14_92014350_-;chr14_92014385_-
chr21:47832816-47832914:mpeak_55834|chr21_47744035_47865196_PCNT_NM_+|	92.679	-1.40936	0.511965	-2.75284	0.00590807	0.0418216	66.3915	59.2831	29.0315	47.3037	35.2373	27.2715	263.863	245.602	158.819	60.6722	61.9034	56.7691	23.1497	0.494488	1.89773	-1.40324	PCNT	-	-
chr2:112638021-112638097:mpeak_48893|chr2_112526983_112641741_ANAPC1_NM_-|	71.4252	-1.85861	0.577903	-3.21612	0.00129935	0.0158111	20.4281	25.4071	58.063	29.8219	66.6652	44.5248	173.639	136.563	139.18	47.3037	54.2845	61.2216	23.1202	-0.440647	1.46476	-1.9054	ANAPC1	chr2:112638031:-	-
chr16:3828103-3828191:mpeak_31784|chr16_3779875_3930121_CREBBP_NM_-|	175.354	-0.979672	0.367375	-2.66668	0.00766042	0.049728	78.3079	95.2765	85.3867	95.6358	60.9511	70.6832	335.362	403.337	382.533	139.854	213.329	143.593	23.097	0.188384	1.17442	-0.986034	CREBBP	-	chr16_3778160_-
chr11:17351672-17351896:mpeak_13947|chr11_17298285_17352958_NUCB2_NM_+|	52.9058	-1.34255	0.668915	-2.00706	0.0447436	0.157638	10.2141	10.5863	4.26934	63.7572	48.5704	60.1085	15.3211	42.3451	54.6475	80.2107	112.378	132.461	22.3211	-2.78205	-1.53313	-1.24892	NUCB2	chr11:17351900:+	chr11_17330175_+;chr11_17330213_+;chr11_17330273_+;chr11_17330348_+
chr11:66442435-66442781:mpeak_15508|chr11_66433049_66445392_RBM4B_NM_-|	58.0868	-1.13808	0.5288	-2.1522	0.031382	0.124351	15.3211	26.4657	28.1776	21.5952	42.8562	39.5158	91.9266	80.4557	141.742	57.5871	79.0459	72.3528	22.2728	-0.571435	0.58793	-1.15936	RBM4B	chr11:66442608:-;chr11:66442672:-;chr11:66442707:-	chr11_66675139_-;chr11_66675202_-
chr17:57165226-57165323:mpeak_38394|chr17_57060282_57184266_TRIM37_NM_-|	53.7178	-1.25911	0.561875	-2.2409	0.0250325	0.10586	3.40469	25.4071	15.3696	51.4171	40.9515	52.3167	78.3079	75.1625	46.1088	77.1256	93.3313	85.7103	22.1373	-1.71141	-0.360124	-1.35128	TRIM37	-	chr17_59087915_-
chr14:64491618-64491681:mpeak_26458|chr14_64319682_64692036_SYNE2_NM_+|	40.4532	-2.27562	0.700458	-3.24876	0.00115911	0.0145774	3.40469	14.8208	5.97707	43.1904	67.6176	74.0225	34.0469	56.1072	19.639	50.3887	53.3322	62.8913	22.0438	-2.93297	-0.601707	-2.33126	SYNE2	-	chr14_64024951_+
chr6:144801034-144801122:mpeak_75749|chr6_144612872_145172124_UTRN_NM_+|	19.4525	-2.4987	1.0053	-2.48552	0.0129364	0.0702761	0	8.46902	0	11.3118	15.2378	6.67872	34.0469	57.1659	24.7622	22.6235	31.4279	21.7059	21.9074	-1.97214	0.614357	-2.5865	UTRN	-	chr6_144479970_+
chr22:36234449-36234746:mpeak_56721|chr22_36140296_36424585_RBFOX2_NM_-|	119.229	-1.82406	0.446503	-4.08522	4.40355e-05	0.00201183	47.6657	47.6382	28.1776	147.053	90.4742	85.1537	204.281	143.973	216.028	130.599	146.663	143.036	21.8829	-1.38581	0.425004	-1.81082	RBFOX2	-	-
chr8:30669829-30669928:mpeak_81599|chr8_30643823_30670352_PPP2CB_NM_-|	162.864	-1.18772	0.593123	-2.00249	0.0452325	0.15883	76.6055	37.052	64.8939	168.648	48.5704	98.5112	308.124	289.005	223.713	176.875	244.757	217.615	21.7522	-0.82235	0.360734	-1.18308	PPP2CB	-	chr8_30812319_-
chr6:2902924-2902982:mpeak_71857|chr6_2890804_2903546_SERPINB9_NM_-|	7.66206	-3.34742	1.33108	-2.51481	0.0119097	0.0666185	0	3.17588	0	7.19839	7.61888	4.45248	3.40469	19.0553	21.3467	9.25508	11.4283	5.00904	21.7493	-2.60111	0.769807	-3.37092	SERPINB9	chr6:2902927:-	-
chr2:100054102-100054160:mpeak_48556|chr2_100017815_100106480_REV1_NM_-|	7.94465	-2.98196	1.28713	-2.31676	0.0205169	0.0935323	0	3.17588	2.5616	6.17005	9.5236	12.2443	13.6188	24.3484	1.70773	4.11337	9.5236	8.3484	21.6919	-2.28374	0.851683	-3.13542	REV1	chr2:100054104:-	chr2_99437645_-
chr8:53548563-53548618:mpeak_82038|chr8_53536419_53627026_RB1CC1_NM_-|	26.4111	-1.97305	0.896685	-2.20039	0.0277793	0.113693	1.70234	1.05863	5.1232	25.7085	51.4274	50.647	3.40469	21.1725	11.9541	37.0203	54.2845	53.4298	21.5819	-4.01859	-1.9862	-2.03239	RB1CC1	-	-
chr3:37356906-37357086:mpeak_58434|chr3_37284681_37407570_GOLGA4_NM_+|	46.9062	-2.25364	0.741748	-3.03828	0.00237933	0.023195	5.10703	16.938	5.1232	47.3037	48.5704	111.312	32.3446	56.1072	38.424	46.2754	81.903	73.466	21.4133	-2.93093	-0.668395	-2.26254	GOLGA4	chr3:37357089:+	chr3_37315434_+;chr3_37315474_+
chr4:2952832-2952983:mpeak_63365|chr4_2940657_2965233_NOP14_NM_-|	327.294	-0.800273	0.390314	-2.05033	0.0403319	0.147048	129.378	120.684	164.796	163.506	161.901	104.077	558.369	563.19	818.005	316.729	386.658	440.239	21.3892	-0.0499874	0.762116	-0.812104	NOP14	-	chr4_2951119_-
chr5:131931386-131931506:mpeak_69927|chr5_131892615_131977869_RAD50_NM_+|	45.0792	-3.04322	0.646165	-4.70966	2.48126e-06	0.000291273	0	7.41039	10.2464	70.9556	77.1412	79.5881	34.0469	60.3418	29.8854	42.162	59.0463	70.1266	21.3119	-3.68874	-0.463295	-3.22545	RAD50	-	chr5_132595749_+
chr1:108728449-108728579:mpeak_3826|chr1_108679459_108742980_SLC25A24_NM_-|	499.402	-1.03638	0.447919	-2.31377	0.0206803	0.0939364	240.031	125.977	202.367	369.175	186.663	266.592	917.564	968.644	809.466	491.547	728.556	686.239	21.0847	-0.533052	0.499839	-1.03289	SLC25A24	-	chr1_108185828_-;chr1_108185880_-
chr13:48881411-48881619:mpeak_23886|chr13_48877882_49054133_RB1_NM_+|	97.155	-0.846939	0.412866	-2.05137	0.0402313	0.146947	54.475	30.7002	31.5931	57.5871	42.8562	32.2805	192.365	182.084	183.581	132.656	110.474	115.208	20.9251	-0.184779	0.639023	-0.823802	RB1	-	chr13_48307352_+
chr1:23395545-23395655:mpeak_1035|chr1_23345940_23409671_KDM1A_NM_+|	93.5334	-1.42926	0.701215	-2.03827	0.0415231	0.149724	80.0102	15.8794	47.8166	45.247	19.9996	38.4027	226.412	174.674	286.046	81.239	57.1416	49.5339	20.9139	0.471412	1.87051	-1.3991	KDM1A	-	chr1_23069079_+;chr1_23069103_+
chr12:53931283-53931343:mpeak_19525|chr12_53901811_54020199_ATF7_NR_-mpeak_19525|chr12_53911138_54020199_ATF7_NM_-||	23.2413	-2.1646	0.967999	-2.23616	0.025341	0.106717	13.6188	0	0.853867	19.5385	11.4283	22.819	40.8563	25.4071	37.5702	45.247	34.285	27.2715	20.9075	-1.8939	-0.0406863	-1.85321	ATF7	-	-
chr14:32563495-32563595:mpeak_25366|chr14_32546494_32623826_ARHGAP5_NM_+|	79.1696	-1.23653	0.577941	-2.13954	0.0323917	0.126825	8.51172	21.1725	7.68481	80.2107	76.1888	86.2668	54.475	86.8074	38.424	153.223	199.043	138.027	20.7945	-2.69906	-1.448	-1.25106	ARHGAP5	-	chr14_32094344_+;chr14_32094370_+
chr2:37319054-37319191:mpeak_46639|chr2_37311593_37323350_GPATCH11_NM_+|	48.8223	-1.1541	0.555669	-2.07695	0.0378059	0.140826	3.40469	9.52765	5.1232	47.3037	52.3798	52.8732	17.0234	39.1692	30.7392	105.919	119.997	102.407	20.7698	-3.07883	-1.91716	-1.16167	GPATCH11	-	chr2_37091916_+;chr2_37091963_+
chr2:48047496-48047552:mpeak_47073|chr2_48035386_48132932_FBXO11_NM_-|	31.8053	-1.53414	0.581008	-2.64048	0.00827889	0.0522188	11.9164	10.5863	9.39254	27.7652	12.3807	31.1674	54.475	49.7555	51.232	30.8503	47.618	44.5248	20.5163	-1.16083	0.33799	-1.49882	FBXO11	-	-
chr10:124009120-124009182:mpeak_12978|chr10_123748688_124013505_TACC2_NM_+|	46.5473	-1.59727	0.50505	-3.1626	0.00156366	0.0177397	20.4281	23.2898	19.639	25.7085	15.2378	28.3846	112.355	86.8074	111.857	33.9353	51.4274	29.4977	20.3708	-0.129997	1.43712	-1.56712	TACC2	chr10:124009179:+	chr10_122249661_+
chr2:11721196-11721403:mpeak_45872|chr2_11674241_11780416_GREB1_NM_+|	241.646	-1.51457	0.498756	-3.03669	0.00239192	0.0232909	81.7126	81.5143	183.581	100.777	101.903	107.416	634.975	396.985	680.532	173.79	149.521	207.04	20.2517	0.161423	1.69108	-1.52966	GREB1	chr2:11721329:+;chr2:11721391:+	chr2_11581202_+;chr2_11581264_+
chr9:132595734-132595911:mpeak_87693|chr9_132590531_132597572_C9orf78_NM_-|	351.572	-1.22639	0.308275	-3.97824	6.94284e-05	0.00271299	146.402	81.5143	93.9254	267.369	211.424	243.217	502.192	555.779	547.329	513.143	529.512	527.063	20.0487	-1.16567	0.0323382	-1.19801	C9orf78	-	chr9_129833455_-;chr9_129833494_-
chr3:183854672-183854848:mpeak_62432|chr3_183852809_183862671_EIF2B5_NM_+|	288.199	-1.07941	0.334499	-3.22695	0.00125119	0.0153262	93.629	109.039	125.519	127.514	174.282	137.47	502.192	468.972	681.386	303.361	363.802	371.226	19.8594	-0.420583	0.670348	-1.09093	EIF2B5	chr3:183854768:+	chr3_184136906_+;chr3_184136995_+
chr11:14673539-14673589:mpeak_13888|chr11_14665268_14891006_PDE3B_NM_+|	9.08345	-3.27409	1.6673	-1.9637	0.0495644	0.169123	3.40469	0	0	0	3.80944	13.3574	28.9399	14.8208	7.68481	9.25508	10.476	17.2534	19.8542	-2.33403	0.476126	-2.81016	PDE3B	chr11:14673591:+	-
chr1:16247384-16247490:mpeak_704|chr1_16174358_16265790_SPEN_NM_+|	27.0634	-1.58858	0.675154	-2.35291	0.018627	0.0878547	8.51172	11.6449	6.83094	23.6519	20.9519	16.1402	42.5586	65.6349	28.1776	39.077	20.9519	40.6289	19.7898	-1.17045	0.438079	-1.60853	SPEN	-	chr1_15920958_+
chr3:179287836-179288116:mpeak_62260|chr3_179280667_179305717_ACTL6A_NM_+|	76.4968	-1.44294	0.473671	-3.0463	0.00231678	0.0228222	39.1539	31.7588	27.3238	48.3321	31.4279	32.2805	160.02	142.915	195.536	46.2754	73.3317	89.6062	19.7076	-0.189688	1.25253	-1.44222	ACTL6A	chr3:179288118:+	chr3_179570108_+;chr3_179570328_+
chr22:30218092-30218164:mpeak_56501|chr22_30185173_30234293_ASCC2_NM_-|	73.1374	-1.71747	0.43913	-3.91107	9.18886e-05	0.00310657	39.1539	26.4657	31.5931	31.8786	33.3326	42.8551	151.509	138.68	209.198	44.2187	64.7605	64.0044	19.4664	-0.1527	1.52952	-1.68222	ASCC2	chr22:30218106:-	chr22_29822117_-
chr8:145224073-145224174:mpeak_84466|chr8_145202918_145316557_MROH1_NM_+|	6.09556	-3.43154	1.2172	-2.81921	0.00481417	0.0367217	3.40469	3.17588	0.853867	4.11337	5.71416	8.3484	10.2141	8.46902	19.639	0	4.7618	4.45248	19.3999	-1.28973	2.05623	-3.34596	MROH1	-	chr8_144169265_+
chr1:111668001-111668087:mpeak_4098|chr1_111660889_111682838_DRAM2_NM_-|	26.3942	-1.3421	0.655424	-2.04768	0.0405909	0.147432	6.80938	5.29314	7.68481	25.7085	21.9043	17.2534	35.7492	46.5796	20.4928	32.9069	52.3798	43.9683	19.2443	-1.71289	-0.330076	-1.38281	DRAM2	chr1:111668003:-	-
chr15:59182479-59182668:mpeak_29680|chr15_59172306_59225852_SLTM_NM_-|	85.6736	-1.63013	0.483336	-3.37267	0.000744428	0.0112462	10.2141	27.5243	20.4928	97.6925	77.1412	80.1447	97.0337	125.977	80.2635	99.7491	163.806	148.045	19.2009	-2.13051	-0.440622	-1.68989	SLTM	-	-
chr17:49343535-49343633:mpeak_38101|chr17_49337896_49375142_UTP18_NM_+|	110.854	-0.908373	0.412856	-2.20022	0.0277913	0.113693	54.475	25.4071	43.5472	63.7572	37.142	46.1945	204.281	241.367	198.951	133.684	142.854	138.584	19.1482	-0.253051	0.634868	-0.887918	UTP18	-	chr17_51266272_+
chr10:33200807-33201062:mpeak_10204|chr10_33190563_33247293_ITGB1_NM_-|	368.993	-1.2453	0.375699	-3.31462	0.000917687	0.0128203	146.402	114.332	132.349	264.284	133.33	219.285	669.022	764.329	620.762	392.827	499.037	471.963	19.1364	-0.650201	0.590855	-1.24106	ITGB1	chr10:33200963:-;chr10:33201012:-	chr10_32911900_-;chr10_32912067_-
chr3:160665426-160665745:mpeak_61891|chr3_160473995_160786598_PPM1L_NM_+|	30.2544	-3.71826	0.733786	-5.06722	4.03674e-07	8.6802e-05	15.3211	3.17588	4.26934	66.8422	47.618	36.1764	23.8328	45.521	51.232	28.7936	21.9043	18.3665	18.8798	-2.7261	0.804048	-3.53015	PPM1L	-	chr3_160947688_+;chr3_160947784_+;chr3_160947824_+;chr3_160947947_+
chr2:68385226-68385282:mpeak_47533|chr2_68385004_68401866_PNO1_NM_+|	79.9359	-1.68443	0.74103	-2.27309	0.0230208	0.100658	45.9633	19.0553	11.9541	106.948	39.0468	29.4977	151.509	119.625	137.473	99.7491	110.474	87.9365	18.8379	-1.18899	0.454627	-1.64361	PNO1	-	-
chr2:86711229-86711288:mpeak_48198|chr2_86668270_86719161_KDM3A_NM_+|	44.7841	-1.97918	0.564376	-3.50685	0.000453444	0.00820665	23.8328	9.52765	19.639	20.5668	27.6184	35.6199	107.248	89.9833	87.0945	24.6802	40.9515	50.647	18.6404	-0.661062	1.28996	-1.95102	KDM3A	-	-
chr12:6878758-6878846:mpeak_17790|chr12_6875540_6879557_PTMS_NM_+|	229.509	-1.18197	0.401933	-2.94071	0.00327464	0.0285237	61.2844	84.6902	93.9254	154.251	130.473	82.3709	343.874	478.5	467.919	311.588	278.089	267.149	18.5927	-0.613722	0.590625	-1.20435	PTMS	chr12:6878805:+;chr12:6878835:+	chr12_6769607_+;chr12_6769663_+
chr6:160524785-160524856:mpeak_76353|chr6_160390130_160525705_IGF2R_NM_+|	483.495	-1.04216	0.441368	-2.36121	0.0182155	0.086639	267.268	264.657	251.037	95.6358	53.3322	58.4388	2030.9	1148.61	1086.12	184.073	203.805	158.063	18.3551	1.91648	2.96594	-1.04946	IGF2R	-	chr6_160103811_+
chr15:102197115-102197228:mpeak_31269|chr15_102194933_102264645_TARSL2_NM_-|	14.7486	-1.80973	0.833516	-2.1712	0.0299157	0.120118	6.80938	3.17588	2.5616	10.2834	8.57124	16.1402	28.9399	14.8208	24.7622	17.4818	29.5232	13.914	18.3105	-1.47982	0.169692	-1.64951	TARSL2	-	chr15_101656952_-
chr12:118828904-118829054:mpeak_21977|chr12_118814357_118852139_SUDS3_NM_+|	296.162	-0.689461	0.341314	-2.02002	0.0433817	0.154645	105.545	113.273	83.679	95.6358	125.712	136.357	473.252	568.483	619.908	345.523	491.418	395.158	18.2047	-0.241845	0.431492	-0.673338	SUDS3	-	chr12_118391173_+
chr12:104341076-104341219:mpeak_21238|chr12_104324111_104341410_HSP90B1_NM_+|	1138.77	-0.6933	0.31603	-2.19378	0.0282514	0.11502	401.753	390.633	347.524	392.827	512.37	515.375	2248.8	2125.72	1892.17	1208.3	1979	1650.76	18.19	-0.31755	0.373274	-0.690824	HSP90B1	chr12:104341154:+;chr12:104341203:+	chr12_103947338_+;chr12_103947362_+;chr12_103947409_+
chr8:30021616-30021672:mpeak_81554|chr8_30013812_30040590_DCTN6_NM_+|	51.0399	-1.5123	0.494695	-3.05703	0.00223542	0.0223331	15.3211	10.5863	20.4928	23.6519	42.8562	39.5158	83.4149	84.6902	87.0945	71.9839	79.9983	52.8732	18.1819	-1.19219	0.31702	-1.50921	DCTN6	-	-
chr9:132593146-132593352:mpeak_87692|chr9_132590531_132597572_C9orf78_NM_-|	327.584	-0.703732	0.348502	-2.0193	0.0434556	0.154712	74.9032	140.797	75.1403	162.478	139.045	163.629	502.192	555.779	547.329	513.143	529.512	527.063	18.1175	-0.67747	0.0323382	-0.709808	C9orf78	-	chr9_129830997_-
chr3:73076859-73076915:mpeak_59713|chr3_73046118_73114547_PPP4R2_NM_+|	8.17579	-3.23568	1.54345	-2.0964	0.0360468	0.13568	1.70234	0	0	2.05668	4.7618	12.8009	13.6188	5.29314	9.39254	14.3968	12.3807	21.7059	18.0432	-3.52668	-0.77646	-2.75022	PPP4R2	-	-
chr6:149893689-149893748:mpeak_75857|chr6_149887527_149911862_GINM1_NM_+|	12.0577	-2.97811	1.38524	-2.1499	0.0315634	0.124719	3.40469	0	0	4.11337	3.80944	12.8009	27.2375	20.1139	9.39254	14.3968	17.1425	32.2805	18.0003	-2.60569	-0.169536	-2.43615	GINM1	-	-
chr10:64957167-64957284:mpeak_10808|chr10_64927894_65225761_JMJD1C_NM_-|	25.3774	-3.51272	1.02694	-3.42056	0.000624933	0.00992514	1.70234	4.23451	2.5616	57.5871	51.4274	61.2216	20.4281	25.4071	1.70773	20.5668	20.9519	36.733	17.8753	-4.32419	-0.718892	-3.6053	JMJD1C	-	chr10_63197413_-
chr10:114194042-114194106:mpeak_12617|chr10_114190665_114206717_ZDHHC6_NM_-|	60.8582	-1.32753	0.544083	-2.43995	0.0146894	0.0761684	18.7258	19.0553	14.5157	56.5588	23.809	37.2895	68.0938	119.625	105.88	71.9839	105.712	89.0496	17.8124	-1.1698	0.138379	-1.30817	ZDHHC6	-	-
chr11:110486270-110486323:mpeak_16821|chr11_110451949_110583912_ARHGAP20_NM_-|	9.47928	-2.78258	1.12296	-2.4779	0.0132157	0.0710968	1.70234	4.23451	0	5.14171	13.333	6.67872	17.0234	21.1725	11.9541	11.3118	16.1901	5.00904	17.7572	-2.08299	0.625329	-2.70832	ARHGAP20	-	-
chr8:117868398-117868515:mpeak_83653|chr8_117859930_117887105_RAD21_NM_-|	627.122	-0.529861	0.261286	-2.02789	0.0425712	0.152592	173.639	174.674	153.696	299.247	251.423	288.298	840.958	1133.79	884.607	1149.69	1164.74	1010.71	17.5567	-0.740904	-0.217724	-0.523181	RAD21	-	chr8_116856166_-
chr1:212788543-212788615:mpeak_8062|chr1_212738675_212792387_ATF3_NM_+|	23.7372	-1.67355	0.698078	-2.39737	0.0165134	0.0817098	8.51172	6.35176	11.1003	6.17005	20.9519	12.2443	51.0703	57.1659	40.9856	17.4818	33.3326	19.4796	17.3994	-0.600462	1.08598	-1.68645	ATF3	-	-
chr2:114198916-114199002:mpeak_48995|chr2_114195267_114253213_CBWD2_NM_+|	17.6012	-1.61702	0.788732	-2.05015	0.04035	0.147048	6.80938	2.11725	2.5616	12.3401	8.57124	21.1493	23.8328	24.3484	18.7851	23.6519	31.4279	35.6199	17.1552	-1.87231	-0.43766	-1.43465	CBWD2	-	-
chr7:158669293-158669374:mpeak_80875|chr7_158649268_158738271_WDR60_NM_+|	6.08785	-3.4765	1.30242	-2.66926	0.00760189	0.0495144	0	1.05863	2.5616	5.14171	7.61888	8.90496	3.40469	8.46902	20.4928	2.05668	6.66652	6.67872	16.7777	-2.58125	1.07139	-3.65264	WDR60	-	chr7_158876618_+
chr11:118455184-118455375:mpeak_17074|chr11_118443101_118471339_ARCN1_NM_+|	278.384	-1.20705	0.482641	-2.50094	0.0123865	0.0683803	105.545	115.39	91.3638	109.004	90.4742	124.67	883.517	582.245	398.756	214.923	380.944	243.773	16.7496	-0.0537218	1.15096	-1.20468	ARCN1	-	chr11_118584515_+;chr11_118584611_+
chr1:63152862-63153012:mpeak_2850|chr1_62921127_63154039_DOCK7_NM_-|	12.7082	-3.42034	1.42796	-2.39527	0.0166081	0.0819131	10.2141	2.11725	2.5616	2.05668	7.61888	20.5927	37.4516	46.5796	5.1232	1.02834	10.476	6.67872	16.7046	-1.02318	2.29371	-3.31689	DOCK7	chr1:63152868:-;chr1:63152950:-	chr1_62687139_-;chr1_62687199_-;chr1_62687281_-
chr4:57357696-57357745:mpeak_64467|chr4_57333761_57367849_SRP72_NM_+|	204.942	-0.747053	0.376277	-1.98538	0.0471019	0.163426	35.7492	61.4004	33.3008	104.891	123.807	112.425	314.934	247.719	219.444	361.976	396.182	447.474	16.6796	-1.38679	-0.624372	-0.762418	SRP72	-	chr4_56491531_+;chr4_56491577_+
chr11:68578539-68578595:mpeak_15729|chr11_68522319_68609399_CPT1A_NM_-|	17.2092	-3.09707	0.813165	-3.80866	0.000139722	0.00404427	6.80938	3.17588	7.68481	10.2834	16.1901	21.7059	30.6422	27.5243	48.6704	5.14171	11.4283	17.2534	16.5393	-1.44711	1.65932	-3.10643	CPT1A	-	-
chr5:37000626-37000680:mpeak_67644|chr5_36876860_37063891_NIPBL_NM_+|	71.1673	-2.77864	0.881749	-3.15128	0.00162557	0.0182074	0	13.7622	0	40.1053	62.8558	63.4479	56.1774	105.863	87.9483	130.599	119.045	174.203	16.5153	-3.59595	-0.761685	-2.83427	NIPBL	-	-
chr2:99977599-99978294:mpeak_48531|chr2_99953833_100015769_EIF5B_NM_+|	348.521	-2.18857	0.574115	-3.81208	0.000137801	0.00403009	52.7727	102.687	30.7392	364.033	387.611	478.642	316.636	514.493	297.146	395.912	623.796	617.782	16.503	-2.72408	-0.537367	-2.18671	EIF5B	chr2:99978168:+	chr2_99361177_+;chr2_99361241_+;chr2_99361351_+;chr2_99361406_+;chr2_99361489_+;chr2_99361589_+;chr2_99361628_+;chr2_99361653_+;chr2_99361687_+;chr2_99361750_+;chr2_99361817_+
chrX:153353235-153353306:mpeak_90661|chrX_153296901_153363188_MECP2_NM_-|	65.6771	-1.379	0.440303	-3.13194	0.00173654	0.0189874	11.9164	28.5829	17.0773	34.9636	36.1897	44.5248	139.592	116.449	94.7793	93.5791	84.7601	85.7103	16.412	-1.00656	0.409925	-1.41648	MECP2	chrX:153353249:-	chrX_154087794_-;chrX_154087839_-
chr10:76287678-76287813:mpeak_11288|chr10_75910942_76468078_ADK_NM_+|	136.712	-1.25611	0.365846	-3.43343	0.000596001	0.00971117	34.0469	52.9314	48.6704	68.8989	69.5223	56.2126	282.589	246.66	298	123.401	174.282	185.335	16.3976	-0.520887	0.776246	-1.29713	ADK	-	chr10_74527982_+
chr2:42797511-42797630:mpeak_46834|chr2_42721708_42980513_MTA3_NM_+|	16.1971	-2.56558	0.691869	-3.70818	0.000208754	0.00520501	6.80938	5.29314	3.41547	8.22673	18.0948	13.3574	27.2375	32.8174	35.0086	14.3968	15.2378	14.4706	16.3238	-1.35444	1.10795	-2.46238	MTA3	-	-
chr14:100706061-100706269:mpeak_27910|chr14_100705101_100743754_YY1_NM_+|	740.776	-0.867937	0.288894	-3.00435	0.0026615	0.0249779	207.686	187.377	181.02	423.677	335.231	331.153	1218.88	1398.45	927.3	1196.99	1214.26	1267.29	16.2523	-0.92006	-0.0534987	-0.866561	YY1	chr14:100706264:+	chr14_100239923_+
chr3:16312531-16312585:mpeak_58013|chr3_16306666_16344914_OXNAD1_NM_+|	50.6121	-1.10175	0.540144	-2.03973	0.0413775	0.149518	18.7258	19.0553	7.68481	30.8503	17.1425	21.7059	74.9032	89.9833	117.834	60.6722	71.427	77.3619	16.0816	-0.616345	0.432693	-1.04904	OXNAD1	-	-
chr10:105763231-105763293:mpeak_12478|chr10_105726942_105785331_SLK_NM_+|	81.0633	-1.49671	0.585186	-2.55766	0.0105379	0.0616374	5.10703	33.8761	14.5157	70.9556	55.2369	61.2216	100.438	101.628	131.496	95.6358	152.378	150.271	16.0386	-1.80865	-0.255844	-1.55281	SLK	-	chr10_104003525_+
chr6:13615944-13616009:mpeak_72193|chr6_13615558_13620985_NOL7_NM_+|	313.278	-1.08476	0.347244	-3.12393	0.00178456	0.0193951	51.0703	52.9314	89.6561	234.462	190.472	183.108	374.516	408.63	424.372	511.086	582.844	656.185	16.0377	-1.65066	-0.535405	-1.11526	NOL7	chr6:13616004:+;chr6:13616053:+	chr6_13615731_+
chr10:112361410-112361651:mpeak_12581|chr10_112327448_112363988_SMC3_NM_+|	61.881	-2.98827	0.652632	-4.57879	4.67664e-06	0.000454333	8.51172	14.8208	8.53867	104.891	79.9983	102.407	61.2844	103.745	34.1547	55.5305	101.903	66.7872	16.0008	-3.17221	-0.17081	-3.0014	SMC3	-	chr10_110601704_+;chr10_110601720_+;chr10_110601769_+
chr2:232327898-232328072:mpeak_51960|chr2_232319978_232329205_NCL_NM_-|	1299.13	-0.801728	0.236921	-3.38395	0.000714518	0.0108729	337.064	371.578	400.464	574.843	529.512	539.307	2005.36	2564	2378.02	1704.99	2105.67	2078.75	15.9644	-0.567516	0.238345	-0.805861	NCL	chr2:232327946:-;chr2:232327986:-	chr2_231463205_-;chr2_231463234_-;chr2_231463316_-
chr6:149900004-149900115:mpeak_75858|chr6_149887527_149911862_GINM1_NM_+|	15.6006	-2.59919	0.983574	-2.6426	0.00822731	0.0520449	5.10703	2.11725	1.70773	29.8219	9.5236	18.3665	27.2375	20.1139	9.39254	14.3968	17.1425	32.2805	15.7409	-2.69181	-0.169536	-2.52228	GINM1	-	-
chr18:18547733-18547906:mpeak_40506|chr18_18531348_18691812_ROCK1_NM_-|	78.985	-1.88356	0.764406	-2.46409	0.0137363	0.0727895	3.40469	9.52765	12.808	82.2673	89.5219	112.425	25.5352	109.039	30.7392	158.365	146.663	167.525	15.5707	-3.46488	-1.51527	-1.9496	ROCK1	-	chr18_20967848_-
chr2:232326243-232326732:mpeak_51959|chr2_232319978_232329205_NCL_NM_-|	1290.58	-0.788181	0.325897	-2.41849	0.0155849	0.0786409	359.195	293.24	422.664	632.43	406.658	535.968	2005.36	2564	2378.02	1704.99	2105.67	2078.75	15.4749	-0.550933	0.238345	-0.789278	NCL	chr2:232326251:-;chr2:232326314:-;chr2:232326350:-;chr2:232326409:-;chr2:232326454:-;chr2:232326562:-;chr2:232326650:-	chr2_231461829_-;chr2_231461850_-;chr2_231461971_-
chr19:337221-337319:mpeak_41521|chr19_306711_344791_MIER2_NM_-|	35.1155	-1.26403	0.638142	-1.98079	0.0476146	0.164462	17.0234	6.35176	11.1003	12.3401	14.2854	15.5837	54.475	93.1592	75.9942	28.7936	59.9987	32.2805	15.4164	-0.291986	0.885229	-1.17722	MIER2	chr19:337237:-	chr19_337247_-
chr14:24631450-24631543:mpeak_25178|chr14_24630421_24635330_IRF9_NM_+|	4.90501	-4.552	1.52293	-2.98898	0.0027991	0.025757	1.70234	0	0	4.11337	1.90472	5.00904	10.2141	8.46902	14.5157	4.11337	3.80944	5.00904	15.3832	-2.69546	1.3602	-4.05567	IRF9	-	-
chr2:44599851-44599944:mpeak_46930|chr2_44589042_44999174_CAMKMT_NM_+|	15.8319	-2.47377	1.16337	-2.12639	0.033471	0.129249	5.10703	0	0	5.14171	4.7618	4.45248	35.7492	48.6969	15.3696	18.5102	23.809	28.3846	15.3494	-1.4911	0.497481	-1.98858	CAMKMT	-	-
chr18:29432570-29432631:mpeak_40748|chr18_29410952_29523091_TRAPPC8_NM_-|	21.4004	-2.31404	0.795876	-2.90754	0.00364289	0.0304449	5.10703	6.35176	0	8.22673	14.2854	18.923	37.4516	46.5796	28.1776	30.8503	28.5708	32.2805	15.318	-1.8544	0.291168	-2.14557	TRAPPC8	-	-
chrX:16888156-16888444:mpeak_88556|chrX_16863226_16888534_RBBP7_NM_-|	534.203	-0.947821	0.345241	-2.74539	0.00604393	0.0424986	165.127	171.498	226.275	206.697	152.378	139.697	1317.61	998.286	1360.21	481.264	548.559	642.827	15.3124	0.174501	1.13604	-0.961543	RBBP7	chrX:16888241:-	chrX_16870058_-;chrX_16870224_-
chr9:132568348-132568579:mpeak_87673|chr9_132565431_132571620_TOR1B_NM_+|	52.7773	-1.05313	0.497994	-2.11474	0.0344518	0.131224	8.51172	11.6449	21.3467	24.6802	31.4279	24.4887	91.9266	102.687	77.7019	61.7005	94.2837	82.9275	15.2409	-0.957495	0.188801	-1.1463	TOR1B	chr9:132568586:+	-
chr1:100585940-100585995:mpeak_3648|chr1_100550990_100598651_SASS6_NM_-|	13.228	-3.31523	1.06946	-3.0999	0.00193585	0.0204013	1.70234	1.05863	0.853867	28.7936	26.6661	21.1493	8.51172	9.52765	5.97707	15.4251	25.7137	13.3574	15.0515	-4.40551	-1.18214	-3.22337	SASS6	-	chr1_100120398_-
chr1:31810072-31810132:mpeak_1536|chr1_31769828_31836878_ZCCHC17_NM_+|	53.3711	-1.21173	0.487907	-2.48352	0.0130091	0.0704409	17.0234	16.938	5.97707	27.7652	25.7137	28.9411	74.9032	109.039	81.9713	82.2673	84.7601	85.1537	15.0194	-1.04521	0.0764944	-1.12171	ZCCHC17	-	-
chr1:38399625-38399675:mpeak_1942|chr1_38328102_38412729_INPP5B_NM_-|	14.6253	-2.39761	0.79599	-3.01212	0.00259431	0.024527	6.80938	5.29314	0.853867	8.22673	9.5236	13.3574	22.1305	27.5243	36.7163	13.3684	13.333	18.3665	15.0008	-1.26361	0.938446	-2.20206	INPP5B	-	-
chr11:61914113-61914186:mpeak_14927|chr11_61891444_61919233_INCENP_NM_+|	71.7163	-1.21985	0.526078	-2.31876	0.0204081	0.0933711	20.4281	19.0553	37.5702	26.7369	19.9996	23.3755	122.569	158.794	234.814	53.4738	71.427	72.3528	14.9278	0.136201	1.38781	-1.25161	INCENP	-	chr11_62146679_+;chr11_62146703_+;chr11_62146726_+
chr12:122818564-122818641:mpeak_22274|chr12_122757647_122907116_CLIP1_NM_-|	35.1969	-2.85586	0.663948	-4.30134	1.69769e-05	0.00101068	0	7.41039	3.41547	34.9636	49.5227	48.4207	23.8328	50.8141	34.1547	57.5871	57.1416	55.0995	14.9251	-3.61786	-0.642376	-2.97549	CLIP1	-	chr12_122334041_-
chr21:38633290-38633436:mpeak_55313|chr21_38597927_38639833_DSCR3_NM_-|	27.5756	-2.11172	0.856285	-2.46614	0.0136578	0.0724644	5.10703	10.5863	0	14.3968	21.9043	10.0181	42.5586	76.2212	39.2779	31.8786	39.9991	38.9592	14.8933	-1.56146	0.512012	-2.07347	DSCR3	chr21:38633383:-	chr21_37261005_-;chr21_37261083_-
chr17:38551686-38551790:mpeak_37311|chr17_38545899_38574202_TOP2A_NM_-|	273.456	-1.26347	0.528819	-2.38923	0.0168838	0.0825934	62.9868	128.094	46.1088	124.429	125.712	116.878	520.918	746.332	362.04	339.353	368.563	340.058	14.5578	-0.629813	0.636639	-1.26645	TOP2A	-	chr17_40395457_-;chr17_40395515_-
chr9:104160718-104160836:mpeak_86518|chr9_104153132_104160919_MRPL50_NM_-|	78.7388	-0.917971	0.447167	-2.05286	0.0400861	0.146543	23.8328	15.8794	11.1003	40.1053	42.8562	30.6108	139.592	91.042	119.541	152.195	136.188	141.923	14.5106	-1.16036	-0.297281	-0.863075	MRPL50	chr9:104160783:-	chr9_101398501_-
chr7:135068980-135069109:mpeak_80113|chr7_135047938_135194875_CNOT4_NM_-|	30.0017	-1.84206	0.809433	-2.27575	0.0228612	0.100064	5.10703	6.35176	0	17.4818	8.57124	27.828	40.8563	33.8761	44.4011	60.6722	51.4274	63.4479	14.4277	-2.23332	-0.559283	-1.67404	CNOT4	-	-
chr12:122817542-122817695:mpeak_22273|chr12_122757647_122907116_CLIP1_NM_-|	34.5224	-3.11767	0.8083	-3.85707	0.000114753	0.00364621	5.10703	5.29314	0	63.7572	31.4279	30.0543	23.8328	50.8141	34.1547	57.5871	57.1416	55.0995	14.3383	-3.59001	-0.642376	-2.94763	CLIP1	-	chr12_122333143_-
chr5:131924445-131924587:mpeak_69922|chr5_131892615_131977869_RAD50_NM_+|	30.7344	-1.97096	0.814914	-2.41861	0.0155799	0.0786409	3.40469	8.46902	0	19.5385	16.1901	25.6018	34.0469	60.3418	29.8854	42.162	59.0463	70.1266	14.3317	-2.36883	-0.463295	-1.90554	RAD50	-	chr5_132588857_+
chr12:56551122-56551254:mpeak_19760|chr12_56546203_56551665_MYL6B_NM_+|	96.2832	-1.23049	0.403151	-3.05219	0.00227182	0.022517	15.3211	15.8794	19.639	75.0689	53.3322	61.7782	105.545	103.745	146.011	192.3	171.425	195.353	14.3088	-1.90334	-0.654001	-1.24934	MYL6B	chr12:56551295:+	chr12_56157402_+;chr12_56157482_+;chr12_56157523_+
chr4:54324805-54324932:mpeak_64366|chr4_54243819_54325468_FIP1L1_NM_+|	123.429	-1.434	0.624065	-2.29784	0.021571	0.0961084	42.5586	57.1659	12.808	59.6438	65.7129	35.0633	268.97	299.592	221.152	117.231	134.283	166.968	14.2498	-0.511512	0.916165	-1.42768	FIP1L1	-	chr4_53458653_+;chr4_53458687_+;chr4_53458712_+;chr4_53458756_+
chr15:32917732-32917950:mpeak_28460|chr15_32907344_32928457_ARHGAP11A_NM_+|	63.5654	-1.00188	0.504787	-1.98476	0.0471708	0.163598	11.9164	5.29314	6.83094	49.3604	31.4279	38.9592	54.475	63.5176	52.0859	130.599	148.568	169.751	14.1349	-2.31646	-1.40025	-0.916205	ARHGAP11A	-	-
chr5:89695105-89695304:mpeak_68950|chr5_89689924_89705603_CETN3_NM_-|	28.5547	-1.55463	0.688387	-2.25836	0.0239232	0.103162	3.40469	10.5863	8.53867	28.7936	7.61888	12.8009	49.368	55.0486	55.5014	30.8503	42.8562	37.2895	14.0882	-1.12723	0.526825	-1.65405	CETN3	-	-
chr1:235383095-235383289:mpeak_8818|chr1_235331967_235491532_ARID4B_NM_-|	35.623	-1.52457	0.664428	-2.29457	0.021758	0.0966784	3.40469	13.7622	4.26934	30.8503	27.6184	17.8099	73.2008	38.1106	40.9856	53.4738	66.6652	57.3257	14.0752	-1.83123	-0.220644	-1.61059	ARID4B	-	chr1_235219870_-
chr1:235359339-235359491:mpeak_8815|chr1_235331967_235491532_ARID4B_NM_-|	42.3287	-2.62676	0.631642	-4.15863	3.20164e-05	0.00158449	5.10703	13.7622	2.5616	48.3321	59.9987	48.4207	73.2008	38.1106	40.9856	53.4738	66.6652	57.3257	14.0717	-2.87072	-0.220644	-2.65008	ARID4B	-	-
chr15:52861038-52861106:mpeak_29486|chr15_52844301_52861643_ARPP19_NM_-|	465.679	-0.9996	0.374546	-2.66883	0.00761153	0.0495248	56.1774	118.566	82.8251	219.037	257.137	296.647	529.429	648.939	654.916	797.993	1050.45	876.026	14.0496	-1.58518	-0.571546	-1.01363	ARPP19	-	chr15_52568875_-;chr15_52568888_-
chr6:111701175-111701400:mpeak_75079|chr6_111621359_111804918_REV3L_NM_-|	51.2548	-2.49886	0.737833	-3.38675	0.000707252	0.0108096	8.51172	7.41039	0	53.4738	33.3326	51.2035	81.7126	55.0486	34.1547	87.409	100.95	101.851	13.9736	-3.11567	-0.76381	-2.35186	REV3L	-	chr6_111380055_-
chr9:88969177-88969234:mpeak_85932|chr9_88903659_88969402_ZCCHC6_NM_-|	19.1631	-2.62855	1.1655	-2.25531	0.0241139	0.103465	5.10703	1.05863	0	23.6519	4.7618	21.1493	35.7492	8.46902	22.2006	33.9353	37.142	36.733	13.9245	-3.00693	-0.698831	-2.3081	ZCCHC6	-	-
chr11:108004605-108004669:mpeak_16748|chr11_107992257_108017996_ACAT1_NM_+|	58.213	-1.21446	0.495519	-2.45088	0.0142509	0.0744088	27.2375	14.8208	17.9312	12.3401	16.1901	18.923	144.699	127.035	162.235	46.2754	68.5699	42.2986	13.8234	0.338203	1.46551	-1.1273	ACAT1	-	chr11_108133971_+
chr15:93555588-93555678:mpeak_31086|chr15_93443550_93567601_CHD2_NM_+|	41.1964	-1.82947	0.7481	-2.4455	0.0144653	0.0753766	13.6188	6.35176	0	15.4251	13.333	26.7149	64.6891	68.8108	83.679	62.7288	73.3317	65.6741	13.7931	-1.47392	0.106425	-1.58034	CHD2	-	chr15_93012399_+;chr15_93012436_+
chr6:24777443-24777521:mpeak_72475|chr6_24775158_24785865_GMNN_NM_+|	163.466	-1.04554	0.507268	-2.06111	0.0392924	0.144328	57.8797	28.5829	35.0086	102.834	37.142	69.0135	257.054	312.295	311.662	241.66	261.899	246.556	13.7877	-0.782817	0.232047	-1.01486	GMNN	-	-
chr16:30737469-30737667:mpeak_33128|chr16_30710461_30748369_SRCAP_NM_+|	31.0317	-1.47211	0.730146	-2.01619	0.0437799	0.155632	5.10703	11.6449	17.0773	8.22673	11.4283	6.67872	91.9266	57.1659	97.3409	33.9353	19.0472	12.8009	13.7276	0.361358	1.9054	-1.54404	SRCAP	chr16:30737569:+;chr16:30737594:+;chr16:30737644:+;chr16:30737712:+	chr16_30726254_+;chr16_30726331_+;chr16_30726345_+
chr14:99958959-99959093:mpeak_27873|chr14_99947738_99976493_CCNK_NM_+|	137.781	-1.27215	0.471863	-2.696	0.0070177	0.0467347	47.6657	34.9347	22.2006	80.2107	64.7605	47.3076	267.268	189.494	307.392	165.563	209.519	217.059	13.7146	-0.875548	0.367925	-1.24347	CCNK	-	-
chr5:99871616-99871679:mpeak_69220|chr5_99871008_99921884_FAM174A_NM_+|	98.7409	-1.06892	0.443422	-2.41062	0.0159255	0.0795991	28.9399	26.4657	17.9312	42.162	35.2373	47.8642	148.104	223.37	163.943	123.401	186.663	140.81	13.6971	-0.772358	0.24794	-1.0203	FAM174A	-	-
chr13:113884428-113884553:mpeak_24718|chr13_113862506_113917800_CUL4A_NM_+|	322.926	-1.21518	0.400355	-3.03525	0.00240339	0.0233757	52.7727	125.977	94.7793	119.288	151.425	116.878	651.998	614.004	742.011	338.324	448.562	419.09	13.6219	-0.502842	0.735567	-1.23841	CUL4A	chr13:113884452:+;chr13:113884496:+;chr13:113884533:+	chr13_113230138_+;chr13_113230176_+;chr13_113230214_+
chr15:72858899-72858953:mpeak_30286|chr15_72766666_72875548_ARIH1_NM_+|	124.918	-1.28917	0.413147	-3.12036	0.00180632	0.0195731	37.4516	26.4657	18.7851	81.239	46.6656	67.9004	173.639	224.429	209.198	194.357	199.043	219.841	13.6188	-1.24342	-0.0141267	-1.22929	ARIH1	-	-
chr19:10262063-10262226:mpeak_42231|chr19_10244377_10305755_DNMT1_NM_-|	1008.58	-1.55013	0.476357	-3.25412	0.00113742	0.0143915	616.249	381.106	260.43	185.102	135.235	129.122	3956.25	2707.97	2599.17	333.183	455.228	343.954	13.578	1.48462	3.0322	-1.54758	DNMT1	-	chr19_10151453_-
chr5:162902466-162902683:mpeak_71129|chr5_162887516_162918117_HMMR_NM_+|	14.5311	-3.15966	1.34767	-2.34453	0.0190509	0.0890095	0	2.11725	0	15.4251	12.3807	8.90496	3.40469	27.5243	16.2235	19.5385	43.8086	25.0452	13.4707	-4.11594	-0.906587	-3.20935	HMMR	-	-
chr14:60594717-60594789:mpeak_26317|chr14_60558628_60600687_PCNXL4_NM_+|	17.7442	-2.00893	0.949701	-2.11532	0.0344023	0.131154	0	0	4.26934	10.2834	4.7618	6.12216	30.6422	38.1106	26.4699	23.6519	41.9038	26.7149	13.4506	-2.30976	0.0454342	-2.35519	PCNXL4	-	-
chr6:47576909-47577051:mpeak_73875|chr6_47445524_47591921_CD2AP_NM_+|	42.9206	-1.5435	0.637073	-2.42279	0.0154017	0.0781831	6.80938	1.05863	6.83094	30.8503	41.9038	35.0633	30.6422	47.6382	31.5931	68.8989	108.569	105.19	13.3781	-2.87481	-1.36321	-1.51159	CD2AP	-	chr6_47609302_+
chr9:75775712-75775806:mpeak_85627|chr9_75766646_75784966_ANXA1_NM_+|	8.57636	-5.18539	1.4825	-3.49774	0.000469217	0.00840216	1.70234	0	0	7.19839	12.3807	13.914	3.40469	16.938	17.9312	6.17005	10.476	12.8009	13.3434	-4.29827	0.378247	-4.67651	ANXA1	chr9:75775809:+	-
chr5:66226731-66226792:mpeak_68248|chr5_65892175_66458974_MAST4_NM_+|	85.4212	-1.06138	0.434927	-2.44037	0.0146724	0.0761272	23.8328	17.9967	24.7622	24.6802	37.142	36.733	129.378	173.615	197.243	102.834	117.14	139.697	13.312	-0.565591	0.475932	-1.04152	MAST4	chr5:66226789:+	chr5_66930961_+
chr8:90965468-90965865:mpeak_82781|chr8_90947840_90996952_NBN_NM_-|	178.818	-1.36813	0.534585	-2.55924	0.0104901	0.061484	27.2375	8.46902	10.2464	149.11	104.76	167.525	91.9266	151.384	102.464	374.316	441.895	516.488	13.2899	-3.19694	-1.94645	-1.25049	NBN	-	chr8_89953253_-;chr8_89953320_-;chr8_89953357_-;chr8_89953455_-;chr8_89953493_-
chr12:46878788-46878848:mpeak_18902|chr12_46777458_47046172_LOC100288798_NR_+|	8.13829	-2.99381	1.48986	-2.00946	0.0444884	0.157263	0	1.05863	0	9.25508	3.80944	7.79184	3.40469	13.7622	6.83094	13.3684	13.333	25.0452	13.2341	-4.30022	-1.10857	-3.19166	LOC100288798	chr12:46878846:+	chr12_46485062_+
chr8:144362798-144362921:mpeak_84296|chr8_144362685_144363870_LINC01604_NR_-|	7.8963	-3.05814	1.42941	-2.13944	0.0323999	0.126825	1.70234	1.05863	0.853867	11.3118	12.3807	7.79184	1.70234	5.29314	20.4928	20.5668	3.80944	7.79184	13.1505	-3.12263	-0.226814	-2.89581	LINC01604	chr8:144362805:-;chr8:144362868:-	chr8_143280637_-;chr8_143280699_-
chr6:135507083-135507165:mpeak_75454|chr6_135502452_135539001_MYB_NM_+|	97.2816	-1.01085	0.426043	-2.37265	0.017661	0.0853792	17.0234	10.5863	26.4699	56.5588	44.7609	49.5339	154.913	142.915	113.564	165.563	199.043	186.448	13.1455	-1.47999	-0.421678	-1.05831	MYB	-	-
chr21:34098804-34098861:mpeak_55101|chr21_34004111_34100351_SYNJ1_NM_-|	8.0002	-3.33418	1.55755	-2.14065	0.032302	0.126631	0	0	2.5616	1.02834	7.61888	3.33936	11.9164	25.4071	21.3467	1.02834	16.1901	5.5656	13.0983	-2.2263	1.3646	-3.5909	SYNJ1	chr21:34098804:-	-
chr9:15472622-15472741:mpeak_84900|chr9_15465578_15511003_PSIP1_NM_-|	46.3751	-2.07258	0.628027	-3.30014	0.00096636	0.0131525	6.80938	11.6449	1.70773	48.3321	34.285	48.9773	40.8563	65.6349	47.8166	67.8706	79.0459	103.52	13.0661	-2.70639	-0.698635	-2.00775	PSIP1	-	chr9_15472631_-
chr10:131973299-131973359:mpeak_13230|chr10_131934638_131978376_GLRX3_NM_+|	89.1392	-1.87292	0.716277	-2.6148	0.00892807	0.0552416	40.8563	10.5863	25.616	66.8422	15.2378	45.6379	165.127	220.194	205.782	76.0973	111.426	86.2668	13.0364	-0.728934	1.11034	-1.83927	GLRX3	-	chr10_130175031_+
chr12:105625865-105625989:mpeak_21338|chr12_105568226_105630008_APPL2_NM_-|	34.3176	-2.37987	0.51873	-4.58788	4.4778e-06	0.000440074	3.40469	10.5863	6.83094	27.7652	31.4279	36.1764	49.368	49.7555	60.6246	47.3037	45.7133	42.8551	13.0342	-2.19543	0.233549	-2.42898	APPL2	-	-
chr3:121553197-121553288:mpeak_60465|chr3_121489421_121553926_IQCB1_NM_-|	32.4224	-2.62376	1.05705	-2.48215	0.0130594	0.0706193	6.80938	0	0	22.6235	3.80944	10.0181	47.6657	64.5763	45.255	60.6722	71.427	56.2126	12.9705	-2.42036	-0.2578	-2.16257	IQCB1	-	-
chr18:55336576-55336723:mpeak_41227|chr18_55315944_55470327_ATP8B1_NM_-|	53.8795	-1.05734	0.452051	-2.33898	0.0193367	0.0898482	13.6188	10.5863	14.5157	26.7369	15.2378	23.9321	107.248	93.1592	98.1948	75.0689	78.0935	90.1628	12.9674	-0.767318	0.295336	-1.06265	ATP8B1	-	-
chr3:151083686-151083838:mpeak_61599|chr3_150804584_151150539_MED12L_NM_+|	7.98025	-2.54288	1.2805	-1.98584	0.0470508	0.163383	1.70234	1.05863	0	5.14171	6.66652	5.5656	5.10703	15.8794	11.1003	17.4818	10.476	15.5837	12.9071	-2.65367	-0.440413	-2.21325	MED12L	chr3:151083840:+	-
chr20:3899004-3899105:mpeak_52577|chr20_3869485_3903890_PANK2_NM_+|	98.6961	-0.894885	0.375012	-2.38628	0.0170197	0.0830106	22.1305	19.0553	23.9083	39.077	38.0944	41.1855	173.639	148.208	183.581	152.195	195.234	148.045	12.879	-0.862545	0.0286993	-0.891245	PANK2	chr20:3899015:+;chr20:3899061:+;chr20:3899100:+	chr20_3918413_+;chr20_3918451_+
chr4:39310404-39310657:mpeak_63986|chr4_39290464_39368001_RFC1_NM_-|	109.06	-1.23755	0.483538	-2.55936	0.0104866	0.061484	27.2375	20.1139	14.5157	66.8422	45.7133	60.6651	129.378	181.025	170.773	134.713	209.519	248.226	12.8575	-1.48536	-0.300145	-1.18522	RFC1	-	chr4_39308906_-
chr1:27742474-27742562:mpeak_1355|chr1_27734840_27816698_WASF2_NM_-|	255.819	-0.932338	0.293544	-3.17615	0.00149245	0.0171425	73.2008	57.1659	64.0401	90.4941	89.5219	86.8234	480.061	501.789	531.106	297.191	383.801	414.637	12.8495	-0.456893	0.46561	-0.922503	WASF2	chr1:27742479:-	chr1_27415985_-
chr1:151028147-151028305:mpeak_5499|chr1_151025803_151032125_CDC42SE1_NM_-|	1015.98	-0.983093	0.283022	-3.47355	0.000513614	0.00887474	246.84	192.67	233.96	437.045	426.657	402.95	1527	1675.81	2044.16	1382.09	1909.48	1713.09	12.8354	-0.911335	0.0682105	-0.979546	CDC42SE1	chr1:151028153:-	-
chr16:75467174-75467234:mpeak_34429|chr16_75327940_75467387_CFDP1_NM_-|	100.469	-1.13787	0.458069	-2.48405	0.0129898	0.0704233	27.2375	27.5243	26.4699	28.7936	26.6661	51.2035	255.352	214.901	163.089	116.203	125.712	142.479	12.8259	-0.392947	0.7204	-1.11335	CFDP1	-	-
chr15:75186067-75186189:mpeak_30378|chr15_75182351_75189852_MPI_NM_+|	26.4293	-2.06014	0.880385	-2.34004	0.0192814	0.08969	8.51172	4.23451	0	19.5385	10.476	6.67872	42.5586	44.4623	62.3323	32.9069	54.2845	31.1674	12.8014	-1.52544	0.335562	-1.861	MPI	chr15:75186127:+;chr15:75186193:+	chr15_74893784_+
chr2:109397747-109397893:mpeak_48785|chr2_109335936_109400051_RANBP2_NM_+|	91.5682	-1.92637	0.776932	-2.47945	0.0131583	0.0709727	15.3211	26.4657	4.26934	76.0973	67.6176	81.2578	134.485	177.849	47.8166	120.316	158.092	189.23	12.788	-2.28828	-0.37679	-1.91149	RANBP2	-	-
chr17:79223859-79224043:mpeak_39882|chr17_79220473_79269139_SLC38A10_NM_-|	128.757	-1.13023	0.546053	-2.06981	0.0384698	0.142546	45.9633	21.1725	52.9398	21.5952	43.8086	37.8461	275.78	254.071	417.541	103.863	121.902	148.602	12.6743	0.217804	1.33951	-1.12171	SLC38A10	chr17:79223863:-;chr17:79223939:-;chr17:79223990:-	chr17_81250060_-;chr17_81250139_-;chr17_81250192_-
chr5:98205524-98205598:mpeak_69156|chr5_98192429_98262238_CHD1_NM_-|	40.4596	-2.62698	0.757996	-3.46569	0.000528881	0.0089761	5.10703	6.35176	0	37.0203	43.8086	27.2715	30.6422	56.1072	49.5243	53.4738	77.1412	99.0677	12.613	-3.23784	-0.753134	-2.48471	CHD1	-	chr5_98869872_-
chr15:63932740-63932813:mpeak_29861|chr15_63901465_64126147_HERC1_NM_-|	29.0327	-3.07319	1.37823	-2.2298	0.0257605	0.107735	10.2141	0	0	16.4535	2.85708	2.7828	134.485	66.6935	41.8395	18.5102	36.1897	18.3665	12.609	-1.11305	1.73379	-2.84684	HERC1	-	chr15_63640527_-;chr15_63640565_-
chr17:78389987-78390139:mpeak_39839|chr17_78388966_78409932_ENDOV_NM_+|	29.6016	-1.60834	0.644127	-2.49693	0.0125273	0.0690676	5.10703	4.23451	10.2464	15.4251	15.2378	20.0362	32.3446	49.7555	73.4326	38.0486	45.7133	45.6379	12.5941	-1.37199	0.265381	-1.63737	ENDOV	chr17:78390153:+	chr17_80416225_+;chr17_80416345_+
chr13:77825431-77825500:mpeak_24293|chr13_77619628_77901177_MYCBP2_NM_-|	43.9583	-1.27921	0.599297	-2.13452	0.0328005	0.127874	5.10703	10.5863	18.7851	21.5952	11.4283	20.5927	83.4149	119.625	70.871	47.3037	64.7605	53.4298	12.5875	-0.636977	0.726927	-1.3639	MYCBP2	-	chr13_77251308_-
chr4:42450595-42450645:mpeak_64209|chr4_42415030_42659122_ATP8A1_NM_-|	13.0044	-2.80444	1.17977	-2.37712	0.0174486	0.08461	0	3.17588	0	7.19839	6.66652	4.45248	23.8328	13.7622	38.424	22.6235	11.4283	24.4887	12.5332	-2.52799	0.376926	-2.90491	ATP8A1	-	-
chr14:21831389-21831458:mpeak_24955|chr14_21820977_21852425_SUPT16H_NM_-|	1255.12	-1.2726	0.261283	-4.87058	1.1127e-06	0.000170992	340.469	423.451	350.939	448.357	344.754	376.235	3297.44	3077.43	2541.11	1255.61	1392.35	1213.3	12.5041	-0.0688402	1.20732	-1.27616	SUPT16H	chr14:21831392:-	-
chr10:32322768-32322949:mpeak_10166|chr10_32300444_32345371_KIF5B_NM_-|	388.287	-1.35213	0.469004	-2.88297	0.00393943	0.0320462	54.475	74.1039	26.4699	307.474	221.9	249.339	386.432	497.555	363.748	682.819	964.741	830.388	12.4264	-2.32837	-0.989835	-1.33853	KIF5B	chr10:32322909:-	chr10_32033848_-;chr10_32033919_-
chr2:29117691-29117803:mpeak_46438|chr2_29117508_29169465_WDR43_NM_+|	328.111	-0.489515	0.249248	-1.96397	0.0495334	0.169086	52.7727	47.6382	59.7707	125.458	117.14	128.009	408.563	464.737	415.833	730.123	683.795	703.492	12.4255	-1.21018	-0.715898	-0.494282	WDR43	-	-
chr1:154107227-154107278:mpeak_5757|chr1_153965411_154127592_NUP210L_NM_-|	40.1565	-2.06959	0.879729	-2.35254	0.0186459	0.0878568	10.2141	0	0	9.25508	9.5236	6.12216	74.9032	64.5763	109.295	70.9556	55.2369	71.7963	12.3173	-1.28564	0.32942	-1.61506	NUP210L	-	-
chr2:138724925-138725038:mpeak_49556|chr2_138721807_138771344_HNMT_NM_+|	13.7009	-3.01901	1.07067	-2.81975	0.00480613	0.0366951	3.40469	0	2.5616	4.11337	9.5236	18.3665	15.3211	19.0553	38.424	14.3968	18.0948	21.1493	12.2931	-2.42332	0.440613	-2.86393	HNMT	chr2:138725014:+	chr2_137967443_+
chr15:91517803-91517939:mpeak_31031|chr15_91510432_91537881_PRC1_NM_-|	316.152	-0.986207	0.452375	-2.18007	0.0292526	0.118185	103.843	63.5176	103.318	127.514	59.0463	70.1266	716.687	632.001	862.406	308.503	369.516	377.348	12.2418	0.0765691	1.06702	-0.990448	PRC1	-	-
chr12:108082218-108082282:mpeak_21403|chr12_108079589_108105887_PWP1_NM_+|	242.882	-1.00743	0.321746	-3.13113	0.00174136	0.0190155	71.4985	48.6969	42.6934	107.976	83.8077	81.8144	456.228	468.972	411.564	347.579	381.896	411.855	12.1853	-0.748171	0.228029	-0.976199	PWP1	-	chr12_107688505_+
chr1:38400880-38400934:mpeak_1943|chr1_38328102_38412729_INPP5B_NM_-|	13.2804	-2.52745	0.922819	-2.73884	0.00616571	0.0431753	1.70234	5.29314	0	9.25508	6.66652	5.00904	22.1305	27.5243	36.7163	13.3684	13.333	18.3665	12.149	-1.58112	0.938446	-2.51957	INPP5B	-	-
chr13:100920932-100921004:mpeak_24565|chr13_100741268_101182351_PCCA_NM_+|	15.7779	-1.65802	0.828717	-2.00071	0.0454234	0.159302	1.70234	7.41039	5.1232	6.17005	1.90472	8.3484	40.8563	43.4037	33.3008	9.25508	12.3807	19.4796	12.1094	-0.206195	1.51566	-1.72185	PCCA	-	-
chr4:104072393-104072539:mpeak_65431|chr4_104027473_104119566_CENPE_NM_-|	9.29948	-4.04521	1.792	-2.25737	0.0239851	0.103311	1.70234	0	0	1.02834	12.3807	8.3484	8.51172	29.6416	4.26934	6.17005	29.5232	10.0181	12.0385	-3.67591	-0.107717	-3.5682	CENPE	-	-
chr17:65900850-65900965:mpeak_39193|chr17_65821779_65978367_BPTF_NM_+|	91.8358	-3.10412	0.523416	-5.93051	3.01996e-09	2.67092e-06	11.9164	19.0553	11.1003	112.089	95.236	155.837	158.318	115.39	75.9942	102.834	125.712	118.547	12.0308	-3.10968	0.0108063	-3.12049	BPTF	chr17:65900984:+	chr17_67904806_+;chr17_67904838_+;chr17_67904866_+
chr3:57898250-57898437:mpeak_59358|chr3_57742982_57913022_SLMAP_NM_+|	19.5197	-3.60985	1.5098	-2.39095	0.0168049	0.0824825	0	2.11725	0	38.0486	10.476	13.3574	20.4281	30.7002	1.70773	37.0203	44.7609	35.6199	12.0216	-4.86925	-1.15185	-3.7174	SLMAP	-	chr3_57912604_+;chr3_57912674_+
chr2:174091818-174091878:mpeak_50324|chr2_173940564_174130777_ZAK_NM_+|	150.047	-1.21693	0.567414	-2.1447	0.0319769	0.125941	20.4281	32.8174	37.5702	54.5021	97.1407	57.3257	217.9	375.813	168.212	199.498	322.85	216.502	11.9193	-1.20227	0.0443663	-1.24664	ZAK	chr2:174091874:+	chr2_173227168_+
chr14:24680884-24681059:mpeak_25202|chr14_24679141_24683036_CHMP4A_NM_-|	143.754	-1.20259	0.547228	-2.1976	0.0279773	0.114234	22.1305	38.1106	41.8395	93.5791	30.4755	42.2986	260.459	324.999	276.653	201.555	207.615	185.335	11.8408	-0.704541	0.536186	-1.24073	CHMP4A	-	-
chr7:26236929-26237021:mpeak_77325|chr7_26231958_26240413_HNRNPA2B1_NM_-mpeak_77325|chr7_26231958_26240413_HNRNPA2B1_NM_-||	343.439	-0.798941	0.364106	-2.19425	0.0282173	0.114992	68.0938	78.3384	71.7249	147.053	98.0931	107.973	571.988	745.274	526.836	462.754	683.795	559.343	11.83	-0.694786	0.112389	-0.807175	HNRNPA2B1	chr7:26236934:-	chr7_26197322_-;chr7_26197357_-
chr17:62481313-62481401:mpeak_39032|chr17_62474105_62493184_POLG2_NM_-|	12.3054	-2.05213	0.893863	-2.2958	0.0216871	0.0964809	1.70234	4.23451	5.1232	4.11337	4.7618	5.5656	30.6422	16.938	46.1088	9.25508	11.4283	7.79184	11.8051	-0.384789	1.71817	-2.10296	POLG2	-	chr17_64485205_-
chr10:103354399-103354500:mpeak_12271|chr10_103348088_103369123_DPCD_NM_+|	159.043	-0.924086	0.438461	-2.10757	0.0350685	0.132855	32.3446	24.3484	46.1088	49.3604	46.6656	75.1356	299.613	314.412	257.014	214.923	314.279	234.312	11.8022	-0.735494	0.190083	-0.925577	DPCD	-	chr10_101594705_+
chr17:62230363-62230520:mpeak_39023|chr17_62226451_62340683_TEX2_NM_-|	66.2893	-1.38443	0.576042	-2.40335	0.0162456	0.0806345	20.4281	9.52765	5.97707	40.1053	17.1425	41.742	98.736	95.2765	111.857	113.118	121.902	119.66	11.7478	-1.46198	-0.213604	-1.24837	TEX2	-	-
chr4:187542638-187542937:mpeak_66935|chr4_187510374_187644987_FAT1_NM_-|	100.49	-1.98221	0.853161	-2.32338	0.020159	0.0925495	66.3915	20.1139	5.97707	29.8219	30.4755	38.9592	326.85	307.002	157.112	59.6438	96.1884	67.3438	11.6924	-0.101984	1.82543	-1.92741	FAT1	chr4:187542622:-	-
chr17:55674244-55674315:mpeak_38212|chr17_55333930_55756909_MSI2_NM_+|	26.1029	-2.35771	1.16237	-2.02836	0.0425238	0.152487	8.51172	1.05863	6.83094	45.247	5.71416	6.67872	32.3446	32.8174	75.9942	18.5102	33.3326	46.1945	11.6192	-1.81326	0.52589	-2.33915	MSI2	-	-
chr10:114912141-114912204:mpeak_12648|chr10_114710008_114925313_TCF7L2_NM_+|	84.9365	-1.71367	0.562446	-3.04681	0.00231281	0.0228097	18.7258	28.5829	12.808	51.4171	27.6184	42.2986	195.77	101.628	220.298	101.806	111.426	106.86	11.6124	-1.01315	0.69362	-1.70677	TCF7L2	-	chr10_113152438_+
chr22:50216591-50216736:mpeak_57365|chr22_50168064_50221196_BRD1_NM_-|	39.559	-1.41819	0.632361	-2.24269	0.0249169	0.105563	8.51172	12.7035	16.2235	10.2834	9.5236	7.79184	132.783	85.7488	105.026	31.8786	38.0944	16.1402	11.571	0.439923	1.90971	-1.46979	BRD1	-	-
chr1:45596444-45596497:mpeak_2324|chr1_45484988_45672250_ZSWIM5_NM_-|	10.2455	-2.72864	1.27316	-2.14321	0.0320965	0.126118	0	2.11725	0	2.05668	3.80944	7.23528	17.0234	14.8208	23.0544	16.4535	21.9043	14.4706	11.57	-2.62946	0.0554592	-2.68491	ZSWIM5	chr1:45596444:-	chr1_45130772_-
chr2:55771404-55771515:mpeak_47205|chr2_55746730_55772042_CFAP36_NM_+|	24.2191	-2.14338	0.868716	-2.4673	0.0136138	0.0723672	5.10703	4.23451	0	13.3684	5.71416	17.2534	42.5586	44.4623	34.1547	40.1053	28.5708	55.0995	11.5636	-1.95967	-0.0306269	-1.92904	CFAP36	chr2:55771506:+	chr2_55544302_+;chr2_55544347_+
chr3:132191981-132192035:mpeak_60949|chr3_132136552_132257019_DNAJC13_NM_+|	32.322	-1.87741	0.543056	-3.45712	0.000545982	0.00917424	6.80938	6.35176	6.83094	23.6519	19.0472	16.1402	54.475	65.6349	52.9398	40.1053	48.5704	47.3076	11.5528	-1.55735	0.347757	-1.90511	DNAJC13	-	-
chr11:73881693-73881881:mpeak_16040|chr11_73724570_73882064_C2CD3_NM_-|	22.6094	-2.43603	0.961886	-2.53255	0.0113235	0.06471	1.70234	6.35176	9.39254	11.3118	5.71416	23.3755	52.7727	53.99	44.4011	8.22673	39.0468	15.0271	11.5416	-1.21146	1.27879	-2.49025	C2CD3	-	-
chr4:143347501-143347689:mpeak_66162|chr4_142950067_143767604_INPP4B_NM_-|	66.9475	-1.41994	0.533816	-2.65998	0.00781449	0.0502267	3.40469	21.1725	12.808	25.7085	32.3802	48.4207	120.866	113.273	93.0715	117.231	107.617	107.416	11.4254	-1.51044	-0.0221071	-1.48833	INPP4B	chr4:143347634:-	chr4_142426483_-
chr19:59077073-59077131:mpeak_45561|chr19_59074871_59084942_MZF1_NM_-|	9.51332	-4.29408	1.64499	-2.6104	0.00904358	0.0556733	1.70234	0	0	9.25508	5.71416	8.3484	1.70234	14.8208	28.1776	7.19839	26.6661	10.5746	11.4249	-3.77583	0.00846879	-3.7843	MZF1	-	-
chr8:18513144-18513200:mpeak_81206|chr8_18393468_18871196_PSD3_NM_-|	35.3853	-2.33585	1.07545	-2.17196	0.0298584	0.120002	0	4.23451	0	19.5385	10.476	21.1493	28.9399	67.7522	15.3696	88.4374	81.903	86.8234	11.3362	-3.59486	-1.1984	-2.39646	PSD3	-	-
chr12:108958049-108958177:mpeak_21436|chr12_108955238_108962606_ISCU_NM_+|	303.414	-1.10071	0.347984	-3.1631	0.00156098	0.0177397	66.3915	66.6935	65.7478	86.3807	135.235	106.303	497.085	624.59	636.985	377.401	545.702	432.447	11.3059	-0.721783	0.375597	-1.09738	ISCU	-	-
chr15:59204752-59204806:mpeak_29688|chr15_59172306_59225852_SLTM_NM_-|	74.8515	-1.60917	0.521423	-3.08611	0.00202797	0.0210829	5.10703	17.9967	11.1003	45.247	57.1416	46.7511	97.0337	125.977	80.2635	99.7491	163.806	148.045	11.2782	-2.12443	-0.440622	-1.68381	SLTM	-	-
chr2:131127908-131128004:mpeak_49359|chr2_131113579_131130729_PTPN18_NM_+|	63.544	-1.2079	0.554198	-2.17954	0.0292913	0.118285	3.40469	15.8794	16.2235	33.9353	27.6184	28.3846	91.9266	142.915	80.2635	119.288	118.093	84.5972	11.2685	-1.34081	-0.0311277	-1.30968	PTPN18	chr2:131127962:+;chr2:131127995:+	chr2_130370419_+
chr19:50718853-50718920:mpeak_44797|chr19_50706884_50812896_MYH14_NM_+|	76.0031	-3.5627	0.537934	-6.62292	3.5216e-11	7.44114e-08	8.51172	19.0553	9.39254	139.854	97.1407	76.2488	132.783	102.687	94.7793	80.2107	92.3789	58.9954	11.1914	-3.08327	0.512013	-3.59528	MYH14	-	-
chr9:34618680-34618766:mpeak_85205|chr9_34613898_34620520_DCTN3_NM_-|	79.4068	-1.03353	0.471187	-2.19345	0.0282748	0.11506	18.7258	13.7622	17.9312	34.9636	17.1425	30.6108	129.378	184.201	138.327	113.118	142.854	111.869	11.157	-0.71421	0.296943	-1.01115	DCTN3	-	-
chr17:29096662-29096744:mpeak_36800|chr17_29036625_29096889_SUZ12P1_NR_+|	12.027	-3.20698	1.4036	-2.28482	0.0223231	0.0985249	1.70234	0	0	6.17005	2.85708	10.0181	22.1305	13.7622	10.2464	21.5952	28.5708	27.2715	11.0688	-3.48383	-0.747043	-2.73679	SUZ12P1	chr17:29096747:+	chr17_30769726_+
chr10:112341675-112341784:mpeak_12571|chr10_112327448_112363988_SMC3_NM_+|	45.916	-2.13757	0.692103	-3.08851	0.00201162	0.0209386	8.51172	7.41039	5.97707	29.8219	35.2373	40.6289	61.2844	103.745	34.1547	55.5305	101.903	66.7872	10.9944	-2.27086	-0.17081	-2.10005	SMC3	-	chr10_110581927_+
chr1:35653570-35653742:mpeak_1738|chr1_35650194_35658743_SFPQ_NM_-|	1377.55	-0.96324	0.451435	-2.13373	0.0328652	0.128008	408.563	301.709	561.845	244.745	232.376	170.864	3791.12	2533.3	5266.65	963.556	976.169	1079.73	10.975	0.973198	1.94066	-0.967457	SFPQ	-	chr1_35188000_-;chr1_35188034_-;chr1_35188072_-;chr1_35188089_-
chr2:63223845-63223912:mpeak_47406|chr2_62900985_63272544_EHBP1_NM_+|	14.8629	-2.96138	1.39569	-2.12179	0.033855	0.130137	3.40469	1.05863	0	20.5668	2.85708	12.8009	39.1539	17.9967	4.26934	19.5385	33.3326	23.3755	10.9003	-3.02079	-0.311967	-2.70882	EHBP1	-	-
chr2:27592732-27592784:mpeak_46333|chr2_27587466_27593324_EIF2B4_NM_-|	102.947	-1.00754	0.441909	-2.27998	0.0226089	0.0994307	25.5352	20.1139	32.447	25.7085	33.3326	20.0362	223.007	279.478	220.298	100.777	146.663	107.973	10.8049	-0.0180143	1.02406	-1.04208	EIF2B4	-	-
chr10:64943199-64943291:mpeak_10807|chr10_64927894_65225761_JMJD1C_NM_-|	13.46	-4.01942	1.56822	-2.56304	0.010376	0.0609012	1.70234	0	0	13.3684	9.5236	11.1312	20.4281	25.4071	1.70773	20.5668	20.9519	36.733	10.7419	-4.32093	-0.718892	-3.60203	JMJD1C	-	-
chr10:64968817-64968900:mpeak_10812|chr10_64927894_65225761_JMJD1C_NM_-|	12.7527	-3.61336	1.60615	-2.2497	0.0244677	0.104287	1.70234	0	0	11.3118	4.7618	9.46152	20.4281	25.4071	1.70773	20.5668	20.9519	36.733	10.7419	-3.90689	-0.718892	-3.18799	JMJD1C	-	-
chr22:41246827-41246935:mpeak_56987|chr22_41222670_41253012_ST13_NM_-|	300.74	-0.795509	0.352575	-2.25628	0.024053	0.103353	85.1172	50.8141	58.9169	109.004	67.6176	70.6832	626.463	575.893	617.346	432.932	486.656	427.438	10.7077	-0.34394	0.433925	-0.777865	ST13	-	chr22_40850844_-;chr22_40850878_-
chr2:170667698-170667841:mpeak_50184|chr2_170655321_170668177_SSB_NM_+|	63.3145	-1.80596	0.628926	-2.87151	0.00408521	0.0327903	11.9164	11.6449	2.5616	60.6722	27.6184	39.5158	88.5219	97.3937	58.063	120.316	128.569	112.982	10.7071	-2.29057	-0.568702	-1.72187	SSB	-	chr2_169811189_+;chr2_169811242_+;chr2_169811307_+
chr14:23378691-23378840:mpeak_25045|chr14_23370942_23388396_RBM23_NM_-|	21.6977	-2.17479	0.899539	-2.41768	0.01562	0.0786776	5.10703	7.41039	3.41547	18.5102	4.7618	7.79184	71.4985	53.99	23.9083	27.7652	22.8566	13.3574	10.6648	-0.963226	1.22347	-2.1867	RBM23	-	chr14_22909595_-
chr5:154183175-154183313:mpeak_70975|chr5_154092461_154193446_LARP1_NM_+|	704.137	-0.789837	0.350618	-2.2527	0.0242782	0.103951	248.542	149.266	184.435	161.45	114.283	98.5112	1955.99	1718.15	1788	609.807	703.794	717.406	10.6596	0.637645	1.42727	-0.789627	LARP1	-	chr5_154803620_+;chr5_154803718_+
chr20:60578345-60578404:mpeak_54582|chr20_60551391_60640866_TAF4_NM_-|	21.2623	-2.17905	0.990253	-2.2005	0.0277716	0.113693	6.80938	9.52765	0.853867	1.02834	14.2854	8.90496	68.0938	53.99	39.2779	12.3401	19.9996	20.0362	10.6536	-0.494477	1.62332	-2.1178	TAF4	chr20:60578350:-	chr20_62003295_-
chr14:103805015-103805230:mpeak_28097|chr14_103800338_103807299_EIF5_NM_+|	406.38	-1.15688	0.3915	-2.95498	0.00312685	0.0277607	83.4149	75.1625	52.0859	211.838	129.521	160.846	607.737	837.374	555.014	713.669	794.268	655.628	10.5325	-1.25334	-0.113321	-1.14002	EIF5	chr14:103805230:+	chr14_103338760_+;chr14_103338816_+;chr14_103338853_+;chr14_103338893_+
chr2:216811755-216811843:mpeak_51450|chr2_216809720_216878346_MREG_NM_-|	98.2989	-1.02221	0.426863	-2.3947	0.0166339	0.0819767	22.1305	14.8208	11.9541	43.1904	36.1897	33.9502	161.723	154.56	149.427	140.883	207.615	203.144	10.5013	-1.21247	-0.244303	-0.968164	MREG	-	-
chr2:74369393-74369500:mpeak_47868|chr2_74362785_74375039_BOLA3_NM_-|	64.4562	-1.5703	0.622163	-2.52393	0.0116051	0.0655684	18.7258	11.6449	10.2464	46.2754	19.0472	15.5837	144.699	95.2765	147.719	98.7208	87.6171	77.9184	10.4766	-0.994164	0.552983	-1.54715	BOLA3	-	chr2_74142319_-
chrX:10047690-10047819:mpeak_88402|chrX_9983794_10109474_WWC3_NM_+|	209.229	-0.947166	0.374994	-2.52581	0.0115431	0.0653543	51.0703	55.0486	43.5472	62.7288	42.8562	50.647	466.443	420.275	543.06	196.413	307.612	271.045	10.4678	-0.0619418	0.883391	-0.945333	WWC3	-	-
chr5:5447949-5448006:mpeak_67141|chr5_5422785_5489261_ICE1_NM_+|	24.273	-3.0485	1.23311	-2.47221	0.013428	0.0715595	3.40469	0	0	11.3118	12.3807	8.3484	52.7727	28.5829	16.2235	71.9839	42.8562	43.4117	10.4675	-3.23432	-0.697578	-2.53674	ICE1	-	-
chr6:88313537-88313592:mpeak_74549|chr6_88299784_88376735_ORC3_NM_+|	9.73511	-3.19678	1.40903	-2.26878	0.0232814	0.101378	1.70234	0	0	5.14171	4.7618	2.7828	13.6188	19.0553	16.2235	17.4818	23.809	12.2443	10.4444	-2.89768	-0.130725	-2.76695	ORC3	chr6:88313591:+	chr6_87603872_+
chr12:104659179-104659242:mpeak_21279|chr12_104609556_104742130_TXNRD1_NM_+mpeak_21279|chr12_104609556_104742130_TXNRD1_NM_+||	162.282	-1.62246	0.818159	-1.98307	0.04736	0.163967	56.1774	9.52765	42.6934	103.863	19.9996	67.9004	413.67	331.35	297.146	211.838	232.376	160.846	10.4013	-0.822977	0.784435	-1.60741	TXNRD1	-	-
chr4:187549298-187549407:mpeak_66937|chr4_187510374_187644987_FAT1_NM_-|	98.5924	-1.90995	0.617822	-3.09142	0.00199203	0.0208117	22.1305	44.4623	15.3696	33.9353	21.9043	31.1674	326.85	307.002	157.112	59.6438	96.1884	67.3438	10.3624	-0.0861674	1.82543	-1.9116	FAT1	-	chr4_186628189_-
chr2:17902403-17902456:mpeak_45950|chr2_17846880_17935096_SMC6_NM_-|	15.0654	-2.83986	1.41169	-2.01167	0.0442546	0.156791	1.70234	0	0	12.3401	3.80944	3.89592	8.51172	21.1725	19.639	32.9069	42.8562	33.9502	10.3542	-3.55768	-1.1534	-2.40428	SMC6	-	-
chrX:76855190-76855259:mpeak_89678|chrX_76764107_77041755_ATRX_NM_-|	118.172	-1.37329	0.624111	-2.2004	0.0277788	0.113693	11.9164	33.8761	5.97707	51.4171	61.9034	69.57	131.081	200.081	169.066	197.442	208.567	277.167	10.3492	-1.8208	-0.449674	-1.37113	ATRX	chrX:76855201:-	-
chr1:220953351-220953398:mpeak_8279|chr1_220921675_220957260_MARC2_NM_+|	14.0989	-2.03908	1.04025	-1.96017	0.0499755	0.170182	0	2.11725	3.41547	14.3968	1.90472	4.45248	28.9399	17.9967	34.1547	17.4818	20.9519	23.3755	10.2343	-1.90733	0.391723	-2.29905	MARC2	-	-
chr7:73917283-73917335:mpeak_78439|chr7_73868119_74016691_GTF2IRD1_NM_+|	93.623	-3.40791	0.513447	-6.63732	3.1943e-11	7.44114e-08	13.6188	23.2898	12.808	130.599	102.855	73.466	148.104	148.208	190.412	64.7855	119.045	96.2849	10.2145	-2.62607	0.797083	-3.42315	GTF2IRD1	-	-
chr15:91137084-91137221:mpeak_30998|chr15_91073117_91185163_CRTC3_NM_+|	23.364	-2.36592	0.938536	-2.52086	0.0117068	0.0658324	0	0	5.97707	4.11337	10.476	3.33936	47.6657	66.6935	61.4785	19.5385	30.4755	30.6108	10.1976	-1.58476	1.12495	-2.70971	CRTC3	chr15:91137139:+;chr15:91137214:+	chr15_90593902_+;chr15_90593995_+
chr13:113505345-113505458:mpeak_24694|chr13_113344642_113536129_ATP11A_NM_+|	11.9108	-2.52697	1.08104	-2.33753	0.0194118	0.0899631	3.40469	4.23451	0.853867	12.3401	0.95236	5.00904	39.1539	23.2898	21.3467	15.4251	8.57124	8.3484	10.1361	-1.1076	1.37325	-2.48086	ATP11A	-	chr13_112851144_+
chr6:13632540-13632671:mpeak_72206|chr6_13622724_13711796_RANBP9_NM_-|	56.0571	-1.87592	0.631637	-2.96993	0.00297865	0.0268682	15.3211	12.7035	2.5616	39.077	19.9996	27.828	97.0337	117.508	88.8022	62.7288	102.855	86.2668	10.083	-1.50655	0.268384	-1.77493	RANBP9	-	chr6_13632400_-
chr9:94055420-94055487:mpeak_86026|chr9_93976707_94124251_AUH_NM_-|	8.84261	-3.51345	1.32002	-2.66167	0.00777536	0.0500895	0	2.11725	0	4.11337	4.7618	3.33936	27.2375	13.7622	22.2006	5.14171	9.5236	13.914	10.0502	-2.52833	1.14496	-3.67329	AUH	-	-
chr2:203162180-203162241:mpeak_51111|chr2_203130514_203168108_NOP58_NM_+|	69.5849	-1.96653	0.599818	-3.27855	0.00104343	0.0137156	1.70234	14.8208	4.26934	62.7288	64.7605	49.5339	54.475	94.2178	58.9169	140.883	165.711	123	10.0152	-3.08981	-1.0491	-2.04071	NOP58	chr2:203162243:+	chr2_202297513_+
chr10:27456237-27456311:mpeak_9993|chr10_27443752_27475307_MASTL_NM_+|	11.5187	-2.69655	1.26275	-2.13546	0.0327233	0.127631	0	2.11725	0	6.17005	4.7618	2.7828	20.4281	15.8794	27.3238	21.5952	23.809	13.3574	9.98214	-2.69545	0.114862	-2.81031	MASTL	-	chr10_27167382_+
chr15:86278315-86278388:mpeak_30828|chr15_85923846_86287858_AKAP13_NM_+|	65.6809	-1.2822	0.56465	-2.27078	0.0231601	0.101058	11.9164	19.0553	18.7851	22.6235	12.3807	12.8009	195.77	197.963	107.587	53.4738	79.0459	56.7691	9.92515	0.0577293	1.40514	-1.34741	AKAP13	-	-
chr1:32645890-32645961:mpeak_1583|chr1_32645344_32660502_TXLNA_NM_+|	94.2352	-1.47742	0.629116	-2.34841	0.0188539	0.0884312	30.6422	20.1139	20.4928	40.1053	10.476	21.7059	192.365	178.908	350.086	78.154	100.95	86.8234	9.87705	-0.0208703	1.43968	-1.46055	TXLNA	-	-
chr17:56284914-56284998:mpeak_38285|chr17_56283531_56296966_MKS1_NM_-|	132.15	-0.779189	0.394163	-1.97682	0.0480621	0.165364	18.7258	32.8174	37.5702	30.8503	23.809	33.3936	303.017	249.836	350.086	170.705	161.901	173.09	9.86926	0.0172724	0.836358	-0.819085	MKS1	chr17:56284922:-	chr17_58207553_-
chr7:2239142-2239196:mpeak_76670|chr7_1855864_2272583_MAD1L1_NM_-|	39.5145	-1.27861	0.627244	-2.03846	0.0415037	0.149724	17.0234	8.46902	5.97707	3.08503	9.5236	8.90496	115.759	82.5729	122.103	30.8503	34.285	35.6199	9.82087	0.548708	1.66918	-1.12047	MAD1L1	chr7:2239138:-	-
chr6:57183343-57183400:mpeak_74096|chr6_57179602_57512796_PRIM2_NM_+|	15.2947	-2.31915	1.17017	-1.98189	0.0474921	0.164261	5.10703	3.17588	0	1.02834	0.95236	7.79184	32.3446	50.8141	43.5472	14.3968	17.1425	7.23528	9.80568	-0.238596	1.7083	-1.9469	PRIM2	-	-
chr4:1705319-1705490:mpeak_63211|chr4_1695440_1714468_SLBP_NM_-|	96.6028	-1.6777	0.528242	-3.17602	0.00149313	0.0171425	22.1305	14.8208	24.7622	41.1337	20.9519	48.9773	238.328	154.56	236.521	94.6074	139.997	122.443	9.80498	-0.847721	0.817882	-1.6656	SLBP	-	chr4_1703599_-;chr4_1703649_-
chr2:160261355-160261429:mpeak_49955|chr2_160176929_160473112_BAZ2B_NM_-|	36.101	-2.94068	1.05383	-2.79048	0.00526305	0.0385983	0	5.29314	0	19.5385	26.6661	9.46152	28.9399	94.2178	39.2779	52.4454	73.3317	84.0406	9.77582	-3.3946	-0.369269	-3.02534	BAZ2B	-	chr2_159404848_-
chr4:106393027-106393155:mpeak_65472|chr4_106290910_106395227_PPA2_NM_-|	313.201	-0.981987	0.360416	-2.72459	0.00643807	0.0440604	62.9868	63.5176	70.0171	84.324	91.4266	74.0225	623.058	597.066	800.928	314.673	506.656	469.737	9.72373	-0.345931	0.646545	-0.992475	PPA2	chr4:106393072:-	-
chr8:128909539-128909765:mpeak_84014|chr8_128902873_129113225_PVT1_NR_+|	20.2049	-2.83424	1.09536	-2.5875	0.00966751	0.0581151	3.40469	1.05863	0	15.4251	15.2378	13.3574	17.0234	12.7035	39.2779	29.8219	56.1892	38.9592	9.70218	-3.30198	-0.856816	-2.44517	PVT1	-	chr8_127897478_+;chr8_127897568_+
chr7:149183554-149183605:mpeak_80549|chr7_149172574_149194898_ZNF746_NM_-|	26.5551	-1.59825	0.745697	-2.1433	0.0320894	0.126118	0	6.35176	6.83094	5.14171	7.61888	5.5656	62.9868	46.5796	94.7793	29.8219	25.7137	27.2715	9.67677	-0.475261	1.30319	-1.77845	ZNF746	chr7:149183553:-	chr7_149486463_-
chr12:52641796-52641856:mpeak_19358|chr12_52626953_52642374_KRT7_NM_+|	77.5916	-1.17821	0.465936	-2.52869	0.0114488	0.0651619	6.80938	12.7035	11.1003	29.8219	31.4279	44.5248	81.7126	121.742	113.564	162.478	150.473	164.742	9.65658	-1.78877	-0.591513	-1.19726	KRT7	-	-
chr12:64827225-64827389:mpeak_20149|chr12_64798152_64841884_XPOT_NM_+|	63.0017	-2.26928	0.714327	-3.17681	0.00148906	0.0171425	15.3211	9.52765	11.1003	49.3604	17.1425	42.8551	209.388	87.8661	75.1403	68.8989	94.2837	75.1356	9.65347	-1.60503	0.643944	-2.24898	XPOT	-	-
chr18:18564306-18564494:mpeak_40507|chr18_18531348_18691812_ROCK1_NM_-|	69.1571	-1.97308	0.858131	-2.29927	0.0214894	0.095846	5.10703	7.41039	3.41547	86.3807	32.3802	57.3257	25.5352	109.039	30.7392	158.365	146.663	167.525	9.63802	-3.46621	-1.51527	-1.95093	ROCK1	-	chr18_20984425_-
chrX:129790579-129790677:mpeak_90339|chrX_129759419_130037291_ENOX2_NM_-|	18.6887	-2.60225	0.881716	-2.95134	0.00316397	0.0279434	1.70234	0	4.26934	13.3684	14.2854	9.46152	15.3211	40.2278	37.5702	26.7369	32.3802	28.9411	9.61942	-2.63581	0.0806188	-2.71643	ENOX2	-	-
chr14:23532653-23532797:mpeak_25083|chr14_23528683_23564823_ACIN1_NM_-|	186.301	-1.34861	0.559249	-2.41146	0.0158886	0.0795089	69.7961	28.5829	42.6934	63.7572	36.1897	22.819	599.225	394.868	474.75	163.506	175.234	164.185	9.60432	0.200527	1.54626	-1.34574	ACIN1	-	chr14_23063563_-
chr9:100773538-100773678:mpeak_86383|chr9_100745488_100777645_ANP32B_NM_+|	2486.21	-0.848004	0.295381	-2.87089	0.00409324	0.0327965	340.469	393.809	521.713	687.961	847.601	720.746	4095.84	4050.31	5054.89	4476.37	3895.15	4749.69	9.51433	-0.845137	0.00875139	-0.853888	ANP32B	chr9:100773672:+	chr9_98011276_+
chr5:112783805-112783882:mpeak_69484|chr5_112363179_112824527_MCC_NM_-|	21.7921	-1.9976	0.894818	-2.23241	0.0255878	0.107382	3.40469	0	5.97707	8.22673	9.5236	4.45248	64.6891	25.4071	58.063	32.9069	23.809	25.0452	9.49833	-1.24281	0.85766	-2.10047	MCC	chr5:112783807:-	chr5_113448112_-
chr19:9925433-9925493:mpeak_42209|chr19_9922393_9929731_FBXL12_NM_-|	17.0282	-2.28748	1.01624	-2.25093	0.0243898	0.104161	8.51172	2.11725	0.853867	4.11337	14.2854	2.22624	39.1539	33.8761	48.6704	17.4818	15.2378	17.8099	9.43534	-0.844915	1.26814	-2.11305	FBXL12	chr19:9925433:-	chr19_9814758_-
chr5:70363310-70363525:mpeak_68432|chr5_70331623_70363497_GTF2H2_NM_-|	53.771	-1.82305	0.561008	-3.24959	0.00115573	0.0145577	3.40469	12.7035	11.9541	33.9353	23.809	26.7149	136.188	95.2765	67.4555	87.409	72.3794	74.0225	9.38793	-1.58962	0.354415	-1.94403	GTF2H2	-	chr5_71067683_-
chr12:122794304-122794380:mpeak_22269|chr12_122757647_122907116_CLIP1_NM_-|	25.6776	-2.85373	1.17704	-2.4245	0.0153297	0.0779582	3.40469	0	0	7.19839	13.333	5.5656	23.8328	50.8141	34.1547	57.5871	57.1416	55.0995	9.38779	-2.93829	-0.642376	-2.29591	CLIP1	-	-
chr3:108366917-108366969:mpeak_60152|chr3_108308336_108412206_DZIP3_NM_+|	19.7365	-3.03708	1.07761	-2.81836	0.00482701	0.0367217	0	3.17588	0	6.17005	6.66652	13.914	22.1305	31.7588	47.8166	29.8219	38.0944	37.2895	9.36784	-3.07434	-0.0488119	-3.02553	DZIP3	chr3:108366921:+	chr3_108648073_+
chr3:93781370-93781634:mpeak_59868|chr3_93780450_93782067_DHFRL1_NM_-|	49.1093	-2.42187	0.6403	-3.7824	0.000155323	0.0043162	5.10703	0	7.68481	30.8503	22.8566	39.5158	71.4985	65.6349	70.0171	73.0123	92.3789	110.755	9.26272	-2.86546	-0.414755	-2.4507	DHFRL1	chr3:93781415:-;chr3:93781463:-	chr3_94062495_-;chr3_94062572_-;chr3_94062621_-
chr5:32400102-32400256:mpeak_67486|chr5_32356045_32444844_ZFR_NM_-|	81.8535	-1.26061	0.608636	-2.07121	0.0383395	0.142188	20.4281	19.0553	2.5616	27.7652	30.4755	25.0452	166.83	155.618	134.057	149.11	146.663	104.633	9.2102	-0.986138	0.189166	-1.1753	ZFR	-	chr5_32400005_-
chr2:10930901-10930980:mpeak_45829|chr2_10924452_10978103_PDIA6_NM_-|	2469.52	-0.893177	0.364184	-2.45254	0.0141851	0.0742697	657.105	383.223	584.045	564.56	404.753	532.072	5421.97	5449.81	6818.13	2368.27	3275.17	3175.18	9.18248	0.11359	1.0043	-0.890713	PDIA6	-	-
chr13:114160326-114160402:mpeak_24758|chr13_114145307_114203739_TMCO3_NM_+|	29.6383	-1.95001	0.905369	-2.15383	0.0312538	0.124134	1.70234	15.8794	3.41547	4.11337	11.4283	12.2443	110.652	44.4623	74.2865	28.7936	31.4279	17.2534	9.15306	-0.40416	1.56607	-1.97023	TMCO3	chr13:114160397:+	chr13_113506063_+
chr1:28559418-28559488:mpeak_1421|chr1_28527881_28559542_DNAJC8_NM_-|	118.583	-1.19718	0.521472	-2.29577	0.0216888	0.0964809	18.7258	15.8794	28.1776	55.5305	38.0944	26.1583	183.853	299.592	203.22	148.081	198.091	207.597	9.14315	-0.931984	0.310322	-1.24231	DNAJC8	-	chr1_28232918_-
chr12:93171710-93171960:mpeak_20870|chr12_93169909_93323107_EEA1_NM_-|	38.8517	-1.69028	0.814388	-2.07552	0.0379384	0.141071	0	2.11725	3.41547	31.8786	14.2854	25.0452	42.5586	28.5829	19.639	89.4657	105.712	103.52	9.14193	-3.686	-1.71823	-1.96777	EEA1	-	-
chr4:156274324-156274487:mpeak_66431|chr4_156269057_156298122_MAP9_NM_-|	21.5167	-3.32441	1.60139	-2.07595	0.0378986	0.141071	0	1.05863	0	15.4251	46.6656	20.5927	8.51172	14.8208	0	49.3604	46.6656	55.0995	9.07427	-6.28733	-2.69533	-3.592	MAP9	-	chr4_155353248_-
chr3:160129692-160129885:mpeak_61844|chr3_160117091_160151444_SMC4_NM_+|	177.284	-1.1184	0.444408	-2.5166	0.0118494	0.0663693	22.1305	27.5243	21.3467	85.3524	77.1412	48.4207	257.054	329.233	198.951	311.588	381.896	366.773	9.04203	-1.57074	-0.433212	-1.13752	SMC4	-	-
chr11:77698056-77698144:mpeak_16234|chr11_77590173_77705717_INTS4_NM_-|	25.8825	-2.41453	0.749329	-3.22225	0.00127186	0.0155568	3.40469	7.41039	5.1232	13.3684	9.5236	16.1402	90.2243	32.8174	53.7936	20.5668	34.285	23.9321	9.01306	-1.29217	1.16643	-2.45861	INTS4	chr11:77698056:-;chr11:77698091:-	chr11_77987012_-
chr14:75179849-75179968:mpeak_27070|chr14_75179849_75201584_FCF1_NM_+|	115.922	-1.39736	0.470854	-2.96772	0.00300022	0.0269892	13.6188	16.938	23.0544	65.8139	48.5704	30.6108	214.495	223.37	164.796	210.81	191.424	187.561	8.89573	-1.4354	0.0311355	-1.46653	FCF1	-	-
chr5:176863578-176863691:mpeak_71484|chr5_176853686_176868735_GRK6_NM_+|	101.826	-1.01749	0.441468	-2.30478	0.0211789	0.0951139	13.6188	19.0553	18.7851	27.7652	29.5232	33.3936	142.997	183.143	252.745	176.875	167.615	156.393	8.88937	-0.817389	0.2088	-1.02619	GRK6	chr5:176863686:+	chr5_177436615_+;chr5_177436636_+;chr5_177436681_+
chr12:122803763-122803898:mpeak_22270|chr12_122757647_122907116_CLIP1_NM_-|	27.346	-1.86837	0.773063	-2.41684	0.0156559	0.078764	0	2.11725	4.26934	18.5102	12.3807	12.2443	23.8328	50.8141	34.1547	57.5871	57.1416	55.0995	8.80491	-2.75575	-0.642376	-2.11337	CLIP1	-	-
chr11:118461133-118461229:mpeak_17075|chr11_118443101_118471339_ARCN1_NM_+|	259.74	-1.75026	0.580751	-3.01379	0.00258008	0.0244445	68.0938	28.5829	67.4555	104.891	75.2365	68.4569	883.517	582.245	398.756	214.923	380.944	243.773	8.80293	-0.598876	1.15096	-1.74983	ARCN1	-	-
chr5:162896650-162896844:mpeak_71124|chr5_162887516_162918117_HMMR_NM_+|	14.9395	-2.82462	1.24978	-2.2601	0.0238149	0.102906	0	1.05863	1.70773	7.19839	14.2854	19.4796	3.40469	27.5243	16.2235	19.5385	43.8086	25.0452	8.80026	-3.88827	-0.906587	-2.98169	HMMR	-	chr5_163469707_+;chr5_163469735_+
chr14:81651865-81651969:mpeak_27354|chr14_81646674_81687575_GTF2A1_NM_-|	178.993	-0.840446	0.392886	-2.13916	0.0324228	0.126825	32.3446	13.7622	24.7622	65.8139	42.8562	56.7691	268.97	292.181	254.452	322.899	408.563	364.547	8.68913	-1.22308	-0.426318	-0.796759	GTF2A1	-	-
chr5:179028941-179028996:mpeak_71618|chr5_178977561_179036376_RUFY1_NM_+|	106.31	-2.16763	0.768992	-2.8188	0.00482033	0.0367217	20.4281	0	17.9312	35.992	28.5708	51.2035	182.151	268.891	211.759	131.628	139.045	188.117	8.68119	-1.59357	0.530744	-2.12431	RUFY1	-	-
chr10:131977597-131977680:mpeak_13231|chr10_131934638_131978376_GLRX3_NM_+|	80.536	-1.10259	0.461008	-2.39169	0.0167711	0.082445	18.7258	17.9967	14.5157	13.3684	21.9043	15.0271	165.127	220.194	205.782	76.0973	111.426	86.2668	8.66822	0.0266657	1.11034	-1.08368	GLRX3	chr10:131977679:+	chr10_130179412_+
chr3:142122704-142122842:mpeak_61324|chr3_142030655_142166904_XRN1_NM_-|	47.6089	-1.8118	0.718313	-2.5223	0.0116591	0.0657254	11.9164	8.46902	4.26934	17.4818	18.0948	22.819	102.141	139.739	42.6934	52.4454	79.9983	71.2397	8.66378	-1.24399	0.48247	-1.72646	XRN1	-	-
chr3:195968534-195968627:mpeak_62848|chr3_195965765_196014584_PCYT1A_NM_-|	14.6806	-2.63356	0.875657	-3.00753	0.00263383	0.024845	0	3.17588	2.5616	3.08503	9.5236	7.23528	27.2375	31.7588	40.9856	17.4818	18.0948	15.0271	8.60778	-1.79021	0.982423	-2.77263	PCYT1A	chr3:195968531:-;chr3:195968576:-	chr3_196241678_-
chr8:145134107-145134250:mpeak_84445|chr8_145133521_145135144_EXOSC4_NM_+|	173.82	-1.39101	0.510327	-2.72573	0.00641598	0.0440161	20.4281	46.5796	24.7622	42.162	81.903	47.8642	318.338	358.875	392.779	186.13	306.66	259.357	8.57669	-0.905721	0.508514	-1.41424	EXOSC4	chr8:145134162:+;chr8:145134256:+	chr8_144079258_+;chr8_144079374_+
chr7:42261211-42261281:mpeak_77702|chr7_42006239_42276618_GLI3_NM_-|	36.5228	-2.71281	0.616587	-4.39972	1.08389e-05	0.000750903	3.40469	6.35176	9.39254	22.6235	30.4755	21.7059	90.2243	66.6935	66.6017	28.7936	35.2373	56.7691	8.56704	-1.96586	0.887779	-2.85364	GLI3	chr7:42261215:-	chr7_42221618_-
chr7:91622195-91622330:mpeak_78774|chr7_91570188_91739435_AKAP9_NM_+|	22.4794	-2.42539	0.952312	-2.54685	0.0108702	0.0629697	8.51172	0	0.853867	4.11337	9.5236	5.00904	56.1774	67.7522	40.1318	18.5102	35.2373	23.9321	8.56289	-0.993425	1.07863	-2.07205	AKAP9	-	-
chr5:128869039-128869096:mpeak_69834|chr5_128796102_129072759_ADAMTS19_NM_+|	42.1309	-2.07619	0.634915	-3.27003	0.00107536	0.0139187	3.40469	3.17588	15.3696	17.4818	21.9043	25.0452	108.95	65.6349	81.9713	52.4454	49.5227	60.6651	8.5557	-1.55353	0.657653	-2.21118	ADAMTS19	chr5:128869091:+	-
chr21:47809510-47809569:mpeak_55830|chr21_47744035_47865196_PCNT_NM_+|	78.0904	-1.13809	0.493966	-2.30399	0.0212233	0.0951597	22.1305	16.938	17.9312	8.22673	11.4283	12.8009	263.863	245.602	158.819	60.6722	61.9034	56.7691	8.52926	0.812473	1.89773	-1.08525	PCNT	chr21:47809561:+	chr21_46389650_+
chr8:63936059-63936417:mpeak_82256|chr8_63928012_63951610_GGH_NM_-|	116.044	-1.15064	0.409088	-2.8127	0.00491274	0.0371105	20.4281	16.938	24.7622	31.8786	37.142	27.828	243.435	208.55	279.215	137.798	171.425	193.126	8.49677	-0.640481	0.541575	-1.18206	GGH	chr8:63936067:-;chr8:63936121:-;chr8:63936221:-;chr8:63936364:-	chr8_63023512_-;chr8_63023807_-
chr4:174254240-174254382:mpeak_66704|chr4_174253389_174255595_HMGB2_NM_-|	629.06	-0.658448	0.261618	-2.51683	0.0118416	0.0663693	110.652	112.214	111.857	151.166	99.9978	135.244	1428.27	1290.47	1225.3	994.406	941.884	947.266	8.48683	-0.207156	0.451823	-0.658978	HMGB2	-	chr4_173333080_-;chr4_173333140_-;chr4_173333174_-;chr4_173333200_-
chr12:27844666-27844869:mpeak_18447|chr12_27677044_27845728_PPFIBP1_NM_+|	124.71	-1.0752	0.464988	-2.31232	0.0207602	0.0939853	27.2375	28.5829	17.9312	29.8219	20.9519	31.1674	270.673	328.174	271.53	113.118	207.615	149.715	8.47353	-0.151913	0.887609	-1.03952	PPFIBP1	-	chr12_27691783_+
chr3:107884269-107884325:mpeak_60138|chr3_107881502_107941417_IFT57_NM_-|	54.3305	-2.2674	0.709668	-3.19501	0.00139826	0.016438	5.10703	9.52765	6.83094	27.7652	32.3802	50.0904	88.5219	125.977	39.2779	73.0123	113.331	80.1447	8.45847	-2.36049	-0.0705111	-2.28998	IFT57	-	-
chr16:30569044-30569099:mpeak_33087|chr16_30567431_30569642_ZNF764_NM_-|	34.7912	-1.9448	0.671945	-2.89428	0.00380029	0.0312571	5.10703	9.52765	0.853867	18.5102	18.0948	15.5837	61.2844	51.8727	70.0171	39.077	68.5699	58.9954	8.45563	-1.75254	0.136462	-1.889	ZNF764	-	-
chr2:136023100-136023151:mpeak_49496|chr2_135958010_136288806_ZRANB3_NM_-|	10.686	-3.28301	1.24133	-2.64475	0.00817518	0.0517788	1.70234	2.11725	0	6.17005	2.85708	8.90496	8.51172	39.1692	20.4928	15.4251	9.5236	13.3574	8.40411	-2.23105	0.831639	-3.06269	ZRANB3	-	-
chr2:169088676-169088736:mpeak_50127|chr2_168812080_169104105_STK39_NM_-|	33.927	-2.30562	0.93113	-2.47615	0.0132808	0.0711986	0	0	5.1232	6.17005	11.4283	13.914	91.9266	52.9314	38.424	79.1823	59.0463	48.9773	8.38577	-2.6208	-0.0305609	-2.59024	STK39	-	-
chr3:183701528-183701592:mpeak_62420|chr3_183639189_183735727_ABCC5_NM_-|	338.58	-1.83516	0.532754	-3.44466	0.000571779	0.00947583	95.3313	82.5729	46.9627	81.239	122.854	60.1085	663.915	949.589	1071.6	199.498	331.421	357.868	8.3746	-0.23257	1.59507	-1.82764	ABCC5	chr3:183701541:-	chr3_183983754_-
chr22:36684787-36684996:mpeak_56738|chr22_36678831_36784112_MYH9_NM_-|	562.278	-1.25277	0.522886	-2.39587	0.0165811	0.0818594	223.007	71.9867	116.98	82.2673	71.427	75.6922	2202.83	1391.04	1346.55	404.138	408.563	352.859	8.33884	0.844771	2.08361	-1.23884	MYH9	chr22:36684926:-	chr22_36288751_-
chr6:44360396-44360450:mpeak_73827|chr6_44355250_44414343_CDC5L_NM_+|	29.4371	-1.80498	0.722272	-2.49903	0.0124532	0.068704	3.40469	0	6.83094	11.3118	8.57124	7.79184	74.9032	63.5176	46.1088	42.162	48.5704	40.0723	8.32031	-1.43498	0.496438	-1.93141	CDC5L	-	chr6_44392691_+;chr6_44392711_+
chr3:37369850-37370019:mpeak_58440|chr3_37284681_37407570_GOLGA4_NM_+|	32.0794	-2.23606	0.886521	-2.52229	0.0116593	0.0657254	1.70234	5.29314	0	15.4251	9.5236	24.4887	32.3446	56.1072	38.424	46.2754	81.903	73.466	8.27047	-2.82111	-0.668395	-2.15271	GOLGA4	-	chr3_37328492_+
chr6:34991327-34991408:mpeak_73351|chr6_34857037_35056382_ANKS1A_NM_+|	54.615	-2.40368	0.834842	-2.8792	0.00398681	0.0323073	22.1305	2.11725	14.5157	25.7085	5.71416	12.8009	158.318	121.742	188.705	25.7085	42.8562	35.0633	8.26928	-0.190118	2.17745	-2.36757	ANKS1A	-	-
chr5:140032562-140032733:mpeak_70451|chr5_140027383_140041886_IK_NM_+|	131.994	-0.844168	0.384602	-2.19491	0.0281697	0.114909	18.7258	29.6416	24.7622	29.8219	24.7614	27.828	279.185	281.595	324.47	144.996	193.329	204.814	8.2609	-0.172388	0.704761	-0.877149	IK	-	chr5_140652986_+;chr5_140653049_+
chr5:131953850-131953995:mpeak_69932|chr5_131892615_131977869_RAD50_NM_+|	27.2738	-2.33472	1.08774	-2.1464	0.0318413	0.125465	0	0	3.41547	7.19839	3.80944	17.2534	34.0469	60.3418	29.8854	42.162	59.0463	70.1266	8.24501	-3.04867	-0.463295	-2.58537	RAD50	-	chr5_132618209_+
chr1:90486425-90486492:mpeak_3361|chr1_90460677_90492912_ZNF326_NM_+|	96.5211	-1.14606	0.439915	-2.6052	0.00918215	0.0562056	8.51172	5.29314	10.2464	40.1053	44.7609	44.5248	88.5219	113.273	92.2177	228.292	234.281	248.226	8.18035	-2.42755	-1.27356	-1.15399	ZNF326	-	-
chr15:89843020-89843205:mpeak_30889|chr15_89787193_89859627_FANCI_NM_+|	142.715	-1.2013	0.391068	-3.07186	0.00212731	0.0216888	23.8328	34.9347	28.1776	43.1904	21.9043	26.1583	389.837	328.174	344.962	158.365	166.663	146.375	8.17943	-0.0697658	1.17307	-1.24284	FANCI	-	-
chr4:13612553-13612605:mpeak_63629|chr4_13571752_13629328_BOD1L1_NM_-|	14.8479	-2.37712	1.13639	-2.09182	0.0364544	0.136757	1.70234	4.23451	0	6.17005	0.95236	6.12216	34.0469	56.1072	18.7851	14.3968	22.8566	12.8009	8.17454	-1.15763	1.12196	-2.27959	BOD1L1	-	chr4_13610951_-
chr10:127524239-127524309:mpeak_13134|chr10_127512103_127541693_BCCIP_NM_+|	18.4442	-2.34756	1.11923	-2.09748	0.0359509	0.135469	0	3.17588	0	4.11337	6.66652	2.7828	51.0703	43.4037	22.2006	23.6519	31.4279	32.8371	8.166	-2.09441	0.40828	-2.50269	BCCIP	-	-
chr12:123801834-123801912:mpeak_22413|chr12_123780597_123834988_SBNO1_NM_-|	139.912	-1.41513	0.543205	-2.60514	0.00918361	0.0562056	28.9399	21.1725	5.97707	52.4454	39.0468	66.2307	199.174	236.074	252.745	225.207	271.423	280.506	8.15262	-1.49159	-0.175773	-1.31582	SBNO1	-	-
chr6:143382680-143382744:mpeak_75674|chr6_143380499_143660775_AIG1_NM_+|	37.6226	-2.06852	0.635486	-3.25502	0.00113384	0.0143872	10.2141	1.05863	7.68481	10.2834	16.1901	21.1493	59.5821	82.5729	90.5099	49.3604	53.3322	49.5339	8.14798	-1.32888	0.612035	-1.94092	AIG1	chr6:143382732:+	chr6_143061543_+;chr6_143061594_+
chr18:18629136-18629194:mpeak_40517|chr18_18531348_18691812_ROCK1_NM_-|	65.4609	-1.90776	0.828096	-2.30379	0.0212343	0.0951597	6.80938	3.17588	3.41547	54.5021	35.2373	44.5248	25.5352	109.039	30.7392	158.365	146.663	167.525	8.10628	-3.32469	-1.51527	-1.80942	ROCK1	-	chr18_21049182_-
chr9:94085024-94085094:mpeak_86028|chr9_93976707_94124251_AUH_NM_-|	9.433	-3.52041	1.15054	-3.05978	0.00221496	0.0221811	1.70234	0	1.70773	6.17005	5.71416	6.12216	27.2375	13.7622	22.2006	5.14171	9.5236	13.914	8.09351	-2.40063	1.14496	-3.54559	AUH	chr9:94085039:-	chr9_91322742_-
chr4:144467919-144468038:mpeak_66203|chr4_144434615_144474271_SMARCA5_NM_+|	143.006	-1.56021	0.513327	-3.03941	0.00237044	0.0231573	25.5352	33.8761	13.6619	51.4171	39.9991	45.6379	291.101	418.158	206.636	169.676	213.329	207.04	7.97833	-0.907333	0.634356	-1.54169	SMARCA5	-	chr4_143546877_+
chr12:46316262-46316418:mpeak_18827|chr12_46315977_46384401_SCAF11_NM_-|	303.006	-0.880153	0.441742	-1.99246	0.0463205	0.161402	27.2375	44.4623	21.3467	99.7491	96.1884	107.416	296.208	490.144	379.971	535.766	799.03	738.555	7.97777	-1.70498	-0.829997	-0.874979	SCAF11	-	chr12_45922440_-;chr12_45922585_-
chr12:125440835-125441104:mpeak_22550|chr12_125432433_125473667_DHX37_NM_-|	136.797	-1.18057	0.430693	-2.74109	0.00612366	0.0429438	35.7492	22.2312	31.5931	20.5668	20.9519	21.1493	347.278	317.588	467.919	115.174	142.854	98.5112	7.90736	0.515342	1.66774	-1.1524	DHX37	chr12:125440849:-	chr12_124956400_-;chr12_124956481_-
chr1:16893671-16893731:mpeak_761|chr1_16890681_16940100_NBPF1_NM_-|	211.289	-1.28315	0.517949	-2.47736	0.0132358	0.0710968	47.6657	45.521	27.3238	67.8706	22.8566	50.0904	634.975	479.558	415.833	262.227	239.995	241.547	7.87461	-0.22467	1.04095	-1.26562	NBPF1	chr1:16893674:-	-
chr2:223799238-223799363:mpeak_51738|chr2_223725731_223806214_ACSL3_NM_+|	339.311	-0.964382	0.396658	-2.43127	0.0150462	0.0770728	51.0703	37.052	40.9856	127.514	63.8081	111.312	534.536	627.766	479.02	602.608	714.27	681.786	7.86609	-1.229	-0.284178	-0.944821	ACSL3	-	chr2_222934611_+
chr2:135892828-135892894:mpeak_49480|chr2_135809834_135926114_RAB3GAP1_NM_+|	209.69	-1.28493	0.38759	-3.31519	0.000915816	0.0128154	39.1539	25.4071	44.4011	61.7005	47.618	54.5429	400.051	525.079	462.796	230.349	341.897	283.289	7.85071	-0.58865	0.698032	-1.28668	RAB3GAP1	-	-
chr17:38555030-38555200:mpeak_37313|chr17_38545899_38574202_TOP2A_NM_-|	257.641	-1.82423	0.762706	-2.39179	0.0167663	0.082445	59.5821	61.4004	6.83094	96.6641	84.7601	105.19	520.918	746.332	362.04	339.353	368.563	340.058	7.84473	-1.16507	0.636639	-1.80171	TOP2A	chr17:38555024:-;chr17:38555190:-	chr17_40398867_-;chr17_40398938_-
chr16:89358093-89358155:mpeak_34999|chr16_89353521_89556969_ANKRD11_NR_-mpeak_34999|chr16_89335071_89556969_ANKRD11_NM_-||	56.1009	-1.88324	0.583126	-3.22956	0.00123981	0.0152747	1.70234	14.8208	4.26934	30.8503	36.1897	23.9321	71.4985	101.628	92.2177	83.2957	107.617	105.19	7.83603	-2.12936	-0.158229	-1.97113	ANKRD11	-	-
chr3:113798860-113798911:mpeak_60304|chr3_113775581_113804519_QTRTD1_NM_+|	64.363	-1.73521	0.482405	-3.597	0.000321908	0.0067796	8.51172	12.7035	10.2464	32.9069	15.2378	22.819	151.509	129.153	123.811	79.1823	93.3313	92.9456	7.77845	-1.17349	0.60755	-1.78104	QTRTD1	-	-
chr5:68599707-68599765:mpeak_68340|chr5_68578861_68628620_CCDC125_NM_-|	25.7547	-2.75766	1.35278	-2.03851	0.0414988	0.149724	1.70234	0	0	6.17005	6.66652	13.3574	18.7258	32.8174	14.5157	82.2673	57.1416	75.6922	7.73102	-3.94364	-1.70319	-2.24045	CCDC125	-	-
chr5:77411942-77412010:mpeak_68693|chr5_77298879_77590579_AP3B1_NM_-|	35.3108	-2.15298	0.758092	-2.84	0.00451139	0.0352731	6.80938	10.5863	4.26934	13.3684	3.80944	13.3574	122.569	102.687	55.5014	22.6235	38.0944	30.0543	7.71663	-0.495114	1.629	-2.12411	AP3B1	-	-
chr4:83292672-83292741:mpeak_64880|chr4_83275307_83295149_HNRNPD_NM_-mpeak_64880|chr4_83275307_83295149_HNRNPD_NM_-||	959.052	-1.47373	0.430899	-3.42014	0.000625899	0.00992514	209.388	124.918	199.805	347.579	169.52	188.117	2168.79	2300.4	2491.59	987.208	1180.93	1140.39	7.67317	-0.400926	1.07306	-1.47398	HNRNPD	chr4:83292680:-	chr4_82371535_-;chr4_82371570_-
chr3:185330401-185330454:mpeak_62543|chr3_185304030_185347569_SENP2_NM_+|	45.6896	-1.66214	0.609544	-2.72686	0.00639401	0.043901	5.10703	1.05863	9.39254	25.7085	19.9996	21.1493	49.368	86.8074	66.6017	78.154	91.4266	93.5021	7.67256	-2.10341	-0.375621	-1.72779	SENP2	-	-
chr4:95921602-95921682:mpeak_65182|chr4_95679127_96075698_BMPR1B_NM_+|	176.513	-1.36527	0.443006	-3.08183	0.00205729	0.0213293	18.7258	16.938	23.9083	63.7572	96.1884	55.0995	234.924	310.178	231.398	309.531	329.517	427.995	7.67188	-1.85193	-0.458561	-1.39337	BMPR1B	-	-
chr1:45228013-45228129:mpeak_2297|chr1_45205489_45232768_KIF2C_NM_+|	116.386	-1.25501	0.621394	-2.01966	0.0434184	0.154645	37.4516	16.938	28.1776	20.5668	7.61888	8.90496	335.362	250.895	490.12	49.3604	79.9983	71.2397	7.67085	1.15451	2.4238	-1.26929	KIF2C	-	chr1_44762395_+
chr6:151256777-151256886:mpeak_75932|chr6_151186814_151422661_MTHFD1L_NM_+|	109.722	-2.49871	0.633506	-3.94425	8.00493e-05	0.00293333	6.80938	31.7588	30.7392	21.5952	54.2845	30.6108	340.469	210.667	353.501	76.0973	86.6648	73.466	7.66135	-0.619643	1.93716	-2.5568	MTHFD1L	-	-
chr6:136682139-136682273:mpeak_75503|chr6_136665376_136871957_MAP7_NM_-|	187.929	-1.83092	0.466064	-3.92848	8.54856e-05	0.00300623	30.6422	31.7588	18.7851	84.324	104.76	47.8642	330.255	404.396	325.323	272.511	332.374	272.158	7.65925	-1.54526	0.273311	-1.81858	MAP7	chr6:136682143:-	-
chr14:50269182-50269302:mpeak_25773|chr14_50251431_50319791_NEMF_NM_-|	35.1074	-2.4538	1.03694	-2.36639	0.0179626	0.086051	1.70234	4.23451	0	20.5668	23.809	19.4796	47.6657	59.2831	9.39254	70.9556	79.0459	85.1537	7.65444	-3.42704	-1.01525	-2.41179	NEMF	-	-
chr8:48761703-48761798:mpeak_81981|chr8_48686938_48872743_PRKDC_NM_-|	263.252	-1.67895	0.770663	-2.17858	0.029363	0.118518	76.6055	34.9347	29.0315	143.968	37.142	48.4207	675.831	847.961	316.785	361.976	261.899	324.475	7.63738	-0.70738	0.956666	-1.66405	PRKDC	-	-
chr3:52515871-52515929:mpeak_59170|chr3_52489523_52525887_NISCH_NM_+|	28.9387	-1.60144	0.70971	-2.25647	0.024041	0.103353	6.80938	1.05863	6.83094	3.08503	13.333	8.90496	68.0938	53.99	71.7249	39.077	34.285	40.0723	7.58426	-0.784737	0.772776	-1.55751	NISCH	chr3:52515926:+	chr3_52481910_+
chr15:52239481-52239679:mpeak_29386|chr15_52230457_52263998_LEO1_NM_-|	96.9406	-1.56642	0.608527	-2.57411	0.0100497	0.0598172	8.51172	0	4.26934	45.247	29.5232	30.6108	86.8196	99.511	67.4555	263.255	267.613	260.47	7.55423	-3.04354	-1.64068	-1.40285	LEO1	-	chr15_51947298_-
chr4:1932448-1932510:mpeak_63251|chr4_1873122_1980364_WHSC1_NM_+|	364.435	-1.10668	0.476864	-2.32074	0.0203009	0.0929992	61.2844	37.052	75.9942	132.656	72.3794	60.1085	820.53	746.332	747.988	501.831	622.844	494.226	7.53097	-0.60495	0.515905	-1.12086	WHSC1	-	-
chr5:98204193-98204252:mpeak_69155|chr5_98192429_98262238_CHD1_NM_-|	37.9666	-4.47117	1.21719	-3.67334	0.000239399	0.00555578	3.40469	0	0	47.3037	13.333	25.6018	30.6422	56.1072	49.5243	53.4738	77.1412	99.0677	7.49526	-4.66274	-0.753134	-3.9096	CHD1	-	-
chr1:16237690-16237803:mpeak_703|chr1_16174358_16265790_SPEN_NM_+|	21.9559	-3.62912	1.47028	-2.46832	0.0135748	0.0722055	3.40469	0	0	18.5102	2.85708	1.66968	42.5586	65.6349	28.1776	39.077	20.9519	40.6289	7.48991	-2.75835	0.438079	-3.19643	SPEN	-	-
chr17:65943826-65943920:mpeak_39204|chr17_65821779_65978367_BPTF_NM_+|	66.3937	-1.68121	0.667484	-2.51873	0.0117779	0.0661441	17.0234	7.41039	1.70773	20.5668	27.6184	25.6018	158.318	115.39	75.9942	102.834	125.712	118.547	7.47537	-1.49702	0.0108063	-1.50783	BPTF	-	chr17_67947788_+
chr3:167437915-167438078:mpeak_61977|chr3_167402177_167452651_PDCD10_NM_-|	134.86	-1.22872	0.515141	-2.38521	0.0170695	0.0831533	17.0234	16.938	18.7851	48.3321	32.3802	47.3076	173.639	316.53	216.028	164.535	301.898	264.923	7.4691	-1.27922	-0.0505018	-1.22872	PDCD10	-	-
chr5:131915716-131915784:mpeak_69919|chr5_131892615_131977869_RAD50_NM_+|	27.1585	-1.93401	0.970694	-1.9924	0.0463276	0.161402	5.10703	1.05863	0	5.14171	9.5236	9.46152	34.0469	60.3418	29.8854	42.162	59.0463	70.1266	7.44202	-1.96831	-0.463295	-1.50502	RAD50	-	-
chr11:61916202-61916261:mpeak_14929|chr11_61891444_61919233_INCENP_NM_+|	64.3687	-1.71197	0.825614	-2.07357	0.0381193	0.141619	6.80938	0	18.7851	10.2834	11.4283	11.6878	122.569	158.794	234.814	53.4738	71.427	72.3528	7.43771	-0.383995	1.38781	-1.77181	INCENP	-	-
chr11:68142831-68142901:mpeak_15672|chr11_68080076_68216276_LRP5_NM_+|	58.8444	-1.69282	0.57975	-2.91992	0.00350119	0.0297407	8.51172	7.41039	11.9541	11.3118	21.9043	25.6018	166.83	105.863	102.464	84.324	94.2837	65.6741	7.43057	-1.07722	0.618947	-1.69616	LRP5	chr11:68142891:+	chr11_68375422_+
chr6:83938572-83938660:mpeak_74423|chr6_83921813_84140938_ME1_NM_-|	172.966	-1.22495	0.575539	-2.12835	0.0333081	0.128901	30.6422	8.46902	40.1318	61.7005	39.9991	36.1764	362.599	402.278	304.831	225.207	304.755	258.801	7.40791	-0.799017	0.439555	-1.23857	ME1	-	-
chr17:78295208-78295281:mpeak_39825|chr17_78234659_78367144_RNF213_NM_+|	154.167	-1.05692	0.53787	-1.965	0.049414	0.168801	22.1305	40.2278	38.424	18.5102	19.9996	14.4706	519.215	588.597	255.306	99.7491	120.95	112.425	7.39351	0.927716	2.03278	-1.10506	RNF213	chr17:78295263:+	chr17_80321460_+
chr6:160100571-160100630:mpeak_76299|chr6_160100330_160114353_SOD2_NM_-|	33.8595	-1.96735	0.93266	-2.10939	0.0349107	0.132376	0	0	5.1232	8.22673	10.476	2.7828	64.6891	75.1625	68.3094	41.1337	78.0935	52.3167	7.38352	-2.06824	0.279123	-2.34737	SOD2	chr6:160100571:-;chr6:160100625:-	chr6_159679500_-;chr6_159679543_-
chr9:119857035-119857091:mpeak_86995|chr9_119188367_120177317_ASTN2_NM_-|	9.48574	-3.90647	1.52221	-2.56631	0.0102788	0.0605832	0	1.05863	1.70773	3.08503	4.7618	16.6968	27.2375	4.23451	24.7622	11.3118	16.1901	2.7828	7.37904	-3.14929	0.892859	-4.04215	ASTN2	-	-
chr19:9927366-9927417:mpeak_42210|chr19_9922393_9929731_FBXL12_NM_-|	15.888	-2.49736	0.915368	-2.72826	0.00636691	0.0437861	3.40469	0	2.5616	3.08503	3.80944	5.5656	39.1539	33.8761	48.6704	17.4818	15.2378	17.8099	7.35366	-1.06241	1.26814	-2.33054	FBXL12	-	-
chr13:113742012-113742062:mpeak_24708|chr13_113623534_113751087_MCF2L_NM_+|	8.14575	-6.30869	1.72028	-3.66724	0.00024518	0.0056007	1.70234	0	0	4.11337	6.66652	4.45248	20.4281	3.17588	46.1088	4.11337	4.7618	2.22624	7.32581	-3.16155	2.65068	-5.81223	MCF2L	-	-
chr3:63884114-63884236:mpeak_59472|chr3_63850232_63985125_ATXN7_NM_+|	110.173	-1.45143	0.737215	-1.96881	0.0489753	0.167927	10.2141	20.1139	0.853867	65.8139	43.8086	32.2805	163.425	138.68	124.665	226.235	210.472	285.515	7.30648	-2.18613	-0.758984	-1.42714	ATXN7	-	-
chr1:168032846-168032999:mpeak_6548|chr1_167905796_168044608_DCAF6_NM_+|	159.738	-1.48027	0.502142	-2.94791	0.00319933	0.0282263	23.8328	22.2312	8.53867	67.8706	57.1416	56.7691	182.151	304.885	261.283	235.49	343.802	352.859	7.29671	-1.73516	-0.316911	-1.41825	DCAF6	-	chr1_168063658_+;chr1_168063759_+
chr11:125496446-125496521:mpeak_17319|chr11_125495030_125525119_CHEK1_NR_+mpeak_17319|chr11_125495030_125545822_CHEK1_NM_+||	17.3781	-3.09799	1.38103	-2.24324	0.0248811	0.105517	3.40469	0	0.853867	18.5102	11.4283	0.55656	15.3211	39.1692	33.3008	26.7369	31.4279	27.828	7.27617	-2.84014	0.0298598	-2.87	CHEK1	-	-
chr4:83280612-83280807:mpeak_64878|chr4_83275307_83295149_HNRNPD_NM_-mpeak_64878|chr4_83275307_83295149_HNRNPD_NM_-||	932.86	-0.805814	0.271292	-2.97028	0.00297526	0.0268663	175.342	189.494	140.888	163.506	119.997	135.801	2168.79	2300.4	2491.59	987.208	1180.93	1140.39	7.26535	0.270352	1.07306	-0.802706	HNRNPD	chr4:83280637:-	chr4_82359625_-
chr6:101304164-101304236:mpeak_74799|chr6_100957409_101329248_ASCC3_NM_-|	24.6429	-3.26077	0.949241	-3.43514	0.000592256	0.00970991	6.80938	0	0.853867	11.3118	14.2854	8.90496	57.8797	74.1039	26.4699	33.9353	33.3326	27.828	7.25441	-2.17066	0.736605	-2.90726	ASCC3	chr6:101304179:-	chr6_100856304_-;chr6_100856351_-
chr19:47882334-47882410:mpeak_44475|chr19_47852537_47885236_DHX34_NM_+|	18.0086	-2.21225	0.923078	-2.3966	0.016548	0.0817918	0	3.17588	2.5616	7.19839	7.61888	4.45248	59.5821	27.5243	31.5931	31.8786	17.1425	23.3755	7.25043	-1.74785	0.71332	-2.46117	DHX34	-	-
chr19:40871450-40871505:mpeak_43972|chr19_40854331_40883892_PLD3_NM_+|	30.9912	-1.92187	0.788642	-2.43694	0.0148122	0.0766345	1.70234	6.35176	6.83094	19.5385	12.3807	3.33936	59.5821	67.7522	79.4097	40.1053	40.9515	33.9502	7.19975	-1.24411	0.846123	-2.09023	PLD3	-	-
chr3:15762342-15762584:mpeak_57995|chr3_15712063_15901053_ANKRD28_NM_-|	92.2296	-1.68525	0.665365	-2.53282	0.011315	0.0647052	10.2141	13.7622	0	28.7936	24.7614	20.0362	177.044	193.729	130.642	149.11	173.33	185.335	7.17258	-1.61793	-0.0181822	-1.59974	ANKRD28	-	chr3_15720813_-
chr12:39751976-39752041:mpeak_18682|chr12_39688319_39837192_KIF21A_NM_-|	53.1305	-4.14306	0.839142	-4.93725	7.92315e-07	0.000128485	6.80938	10.5863	0	44.2187	45.7133	24.4887	161.723	133.387	69.1633	33.9353	61.9034	45.6379	7.16316	-2.71755	1.36446	-4.08201	KIF21A	-	-
chrX:24225868-24225983:mpeak_88694|chrX_24167761_24228309_ZFX_NM_+|	58.5206	-1.36814	0.591943	-2.31128	0.0208175	0.0940908	8.51172	2.11725	5.97707	23.6519	20.9519	22.2624	59.5821	98.4523	74.2865	105.919	158.092	122.443	7.14789	-2.00957	-0.734179	-1.27539	ZFX	-	-
chr4:17811833-17811922:mpeak_63716|chr4_17806394_17812381_DCAF16_NM_-|	60.9517	-1.70887	0.756346	-2.25937	0.0238603	0.103049	0	6.35176	0	14.3968	13.333	7.79184	80.0102	92.1006	95.6331	156.308	121.902	143.593	7.11698	-2.48347	-0.655714	-1.82776	DCAF16	-	-
chr5:96273313-96273471:mpeak_69107|chr5_96271345_96364105_LNPEP_NM_+|	11.1747	-2.6061	1.23054	-2.11786	0.0341872	0.130908	1.70234	1.05863	0	7.19839	2.85708	3.89592	13.6188	19.0553	25.616	20.5668	19.0472	19.4796	7.10491	-2.33716	-0.0197528	-2.31741	LNPEP	chr5:96273474:+	chr5_96937677_+;chr5_96937766_+
chr12:62669315-62669385:mpeak_20053|chr12_62654120_62797972_USP15_NM_+|	28.0067	-2.40891	1.17923	-2.04277	0.0410747	0.148615	3.40469	0	0	4.11337	4.7618	5.5656	54.475	52.9314	36.7163	39.077	70.4747	64.561	7.08706	-2.08455	-0.272723	-1.81183	USP15	-	-
chr17:77986847-77987002:mpeak_39792|chr17_77914906_78009657_TBC1D16_NM_-|	158.534	-1.34162	0.487263	-2.75337	0.00589854	0.0417892	8.51172	30.7002	24.7622	55.5305	48.5704	43.9683	308.124	233.957	362.04	330.098	212.376	243.773	7.07583	-1.21071	0.201532	-1.41224	TBC1D16	chr17:77986853:-	chr17_80013054_-
chr7:148062708-148062758:mpeak_80449|chr7_145813452_148112508_CNTNAP2_NM_+|	43.7834	-1.47914	0.657439	-2.24985	0.0244587	0.104287	0	4.23451	5.1232	17.4818	9.5236	13.914	52.7727	73.0453	75.1403	106.948	80.9506	86.2668	6.98482	-2.12856	-0.448148	-1.68041	CNTNAP2	-	-
chr3:160131247-160131397:mpeak_61845|chr3_160117091_160151444_SMC4_NM_+|	177.642	-1.69283	0.559106	-3.02774	0.0024639	0.0237185	22.1305	27.5243	5.1232	84.324	78.0935	69.0135	257.054	329.233	198.951	311.588	381.896	366.773	6.97597	-2.07891	-0.433212	-1.6457	SMC4	-	chr3_160413508_+;chr3_160413545_+;chr3_160413605_+
chr12:123970175-123970238:mpeak_22440|chr12_123957229_124018265_RILPL1_NM_-|	42.4216	-2.34737	0.629928	-3.72641	0.000194225	0.00506538	15.3211	3.17588	3.41547	13.3684	11.4283	15.0271	103.843	84.6902	126.372	38.0486	47.618	46.7511	6.95842	-0.861883	1.24982	-2.11171	RILPL1	-	chr12_123485640_-
chr5:102484850-102484941:mpeak_69261|chr5_102455957_102537222_PPIP5K2_NM_+|	21.335	-3.56925	1.38394	-2.57905	0.00990733	0.0591361	1.70234	0	0	11.3118	5.71416	12.2443	10.2141	26.4657	36.7163	39.077	48.5704	64.0044	6.95819	-4.10384	-1.04699	-3.05685	PPIP5K2	-	-
chr13:53047957-53048303:mpeak_24110|chr13_53029494_53049029_CKAP2_NM_+|	41.233	-1.96212	0.924712	-2.12188	0.0338482	0.130137	3.40469	2.11725	0	21.5952	5.71416	20.0362	37.4516	44.4623	37.5702	89.4657	119.997	112.982	6.93223	-3.09998	-1.43223	-1.66775	CKAP2	chr13:53048288:+	chr13_52473831_+;chr13_52473910_+;chr13_52474010_+
chr7:43807244-43807309:mpeak_77753|chr7_43798271_43846575_BLVRA_NM_+|	105.474	-0.963011	0.419722	-2.2944	0.0217675	0.0966784	8.51172	14.8208	20.4928	21.5952	27.6184	24.4887	190.663	213.843	227.983	151.166	198.091	166.412	6.92904	-0.749944	0.294594	-1.04454	BLVRA	-	chr7_43767707_+
chr8:30601742-30601802:mpeak_81593|chr8_30601681_30623742_UBXN8_NM_+|	66.9512	-1.48903	0.507205	-2.93575	0.00332738	0.0288349	15.3211	8.46902	4.26934	16.4535	19.9996	18.3665	148.104	125.977	132.349	87.409	120.95	105.746	6.90388	-0.966202	0.371759	-1.33796	UBXN8	-	-
chrX:16887193-16887358:mpeak_88555|chrX_16863226_16888534_RBBP7_NM_-|	491.651	-1.34975	0.434882	-3.10371	0.00191109	0.0202418	68.0938	59.2831	126.372	106.948	79.0459	111.312	1317.61	998.286	1360.21	481.264	548.559	642.827	6.90266	-0.228542	1.13604	-1.36459	RBBP7	-	chrX_16869026_-;chrX_16869070_-
chr2:242274536-242274639:mpeak_52303|chr2_242254601_242291381_SEPT2_NM_+|	347.52	-0.709758	0.339591	-2.09004	0.0366145	0.137235	59.5821	30.7002	42.6934	85.3524	60.9511	62.3348	611.142	706.104	617.346	646.827	590.463	656.741	6.87357	-0.649841	0.0305694	-0.680411	SEPT2	chr2:242274627:+	chr2_241335141_+;chr2_241335210_+
chr16:2810419-2810591:mpeak_31624|chr16_2802329_2820858_SRRM2_NM_+|	729.816	-1.30431	0.468318	-2.78509	0.00535126	0.0390243	234.924	134.446	99.9025	80.2107	47.618	72.3528	2667.57	2449.66	1768.36	398.997	395.229	408.515	6.81527	1.22912	2.51726	-1.28814	SRRM2	chr16:2810622:+	chr16_2760620_+
chr4:174253977-174254159:mpeak_66703|chr4_174253389_174255595_HMGB2_NM_-|	627.687	-1.15075	0.335176	-3.43328	0.00059632	0.00971117	93.629	75.1625	99.9025	179.96	99.0455	156.95	1428.27	1290.47	1225.3	994.406	941.884	947.266	6.81267	-0.698216	0.451823	-1.15004	HMGB2	-	chr4_173332826_-;chr4_173332969_-
chr17:74734561-74734617:mpeak_39640|chr17_74732646_74774269_MFSD11_NM_+|	73.4223	-1.63944	0.559516	-2.93011	0.0033884	0.0291637	10.2141	19.0553	7.68481	9.25508	24.7614	18.3665	202.579	146.091	193.828	79.1823	97.1407	72.9094	6.81186	-0.50336	1.12212	-1.62548	MFSD11	chr17:74734613:+	chr17_76738542_+
chr2:109398575-109398819:mpeak_48786|chr2_109335936_109400051_RANBP2_NM_+|	76.5097	-1.88015	0.886273	-2.12142	0.0338869	0.130137	6.80938	9.52765	0	30.8503	18.0948	25.0452	134.485	177.849	47.8166	120.316	158.092	189.23	6.80424	-2.17919	-0.37679	-1.8024	RANBP2	chr2:109398835:+	chr2_108782169_+
chrX:76929349-76929503:mpeak_89684|chrX_76764107_77041755_ATRX_NM_-|	109.582	-1.09437	0.46049	-2.37654	0.017476	0.0846631	11.9164	12.7035	9.39254	32.9069	32.3802	32.2805	131.081	200.081	169.066	197.442	208.567	277.167	6.79941	-1.52034	-0.449674	-1.07067	ATRX	chrX:76929451:-	chrX_77673844_-;chrX_77673906_-;chrX_77673955_-;chrX_77673990_-
chr3:63820824-63820892:mpeak_59463|chr3_63819875_63849599_THOC7_NM_-|	818.452	-1.099	0.389001	-2.82517	0.0047255	0.036309	129.378	78.3384	100.756	283.822	153.33	185.335	1615.53	1324.34	1624.06	1272.06	1565.68	1488.8	6.75894	-1.0129	0.0770618	-1.08996	THOC7	-	chr3_63835157_-
chr1:62276550-62276606:mpeak_2810|chr1_62208148_62626579_INADL_NM_+|	15.6378	-2.47766	0.994139	-2.49227	0.0126929	0.0695721	0	1.05863	3.41547	8.22673	6.66652	5.00904	32.3446	42.3451	24.7622	10.2834	25.7137	27.828	6.74814	-2.15327	0.639872	-2.79314	INADL	-	-
chr17:38555283-38555393:mpeak_37314|chr17_38545899_38574202_TOP2A_NM_-|	244.674	-1.07483	0.534314	-2.0116	0.0442621	0.156791	28.9399	59.2831	21.3467	56.5588	47.618	45.0814	520.918	746.332	362.04	339.353	368.563	340.058	6.725	-0.445961	0.636639	-1.0826	TOP2A	-	chr17_40399045_-
chr1:27209501-27209678:mpeak_1301|chr1_27206240_27216869_GPN2_NM_-|	40.744	-1.76616	0.811716	-2.17583	0.0295679	0.119151	0	1.05863	10.2464	10.2834	6.66652	16.1402	73.2008	101.628	78.5558	62.7288	79.9983	48.4207	6.69241	-1.54944	0.406641	-1.95608	GPN2	-	chr1_26883011_-
chr19:42410912-42410964:mpeak_44085|chr19_42387266_42411256_ARHGEF1_NM_+|	21.6705	-2.16134	1.02444	-2.10979	0.0348768	0.132358	1.70234	4.23451	6.83094	7.19839	6.66652	0.55656	86.8196	34.9347	69.1633	20.5668	8.57124	12.8009	6.6876	-0.175709	2.18659	-2.3623	ARHGEF1	-	-
chr21:47706662-47706741:mpeak_55805|chr21_47706266_47717452_YBEY_NM_+|	9.05964	-4.35509	1.40423	-3.10141	0.001926	0.0203482	1.70234	0	0.853867	3.08503	15.2378	3.33936	20.4281	14.8208	23.0544	6.17005	6.66652	13.3574	6.5765	-3.0831	1.15434	-4.23744	YBEY	chr21:47706712:+;chr21:47706739:+	chr21_46286802_+
chr1:16931896-16931967:mpeak_770|chr1_16890681_16940100_NBPF1_NM_-|	212.927	-1.88457	0.452517	-4.16465	3.11837e-05	0.00155956	37.4516	39.1692	23.9083	74.0406	68.5699	37.8461	634.975	479.558	415.833	262.227	239.995	241.547	6.56896	-0.844039	1.04095	-1.88499	NBPF1	chr1:16931912:-	chr1_16605418_-
chr3:196668572-196668853:mpeak_62959|chr3_196663953_196669464_NCBP2_NM_-|	161.901	-1.13037	0.401895	-2.81261	0.00491411	0.0371105	22.1305	11.6449	17.0773	50.3887	32.3802	51.7601	221.305	265.715	290.315	333.183	328.564	318.352	6.54193	-1.40352	-0.334391	-1.06913	NCBP2	-	-
chr13:100914992-100915095:mpeak_24564|chr13_100741268_101182351_PCCA_NM_+|	16.5445	-4.14293	0.906008	-4.57273	4.81411e-06	0.000462373	1.70234	0	3.41547	13.3684	8.57124	12.8009	40.8563	43.4037	33.3008	9.25508	12.3807	19.4796	6.53	-2.76302	1.51566	-4.27868	PCCA	-	-
chr11:32608621-32608748:mpeak_14196|chr11_32605312_32623824_EIF3M_NM_+|	199.785	-1.23496	0.57273	-2.15627	0.0310625	0.12349	39.1539	17.9967	31.5931	50.3887	16.1901	56.7691	439.205	445.682	477.312	222.122	303.803	297.203	6.51474	-0.475018	0.726749	-1.20177	EIF3M	-	-
chr11:108009657-108009782:mpeak_16749|chr11_107992257_108017996_ACAT1_NM_+|	53.8195	-1.35028	0.645196	-2.09282	0.0363651	0.136604	8.51172	13.7622	5.97707	15.4251	3.80944	7.23528	144.699	127.035	162.235	46.2754	68.5699	42.2986	6.50989	0.0939495	1.46551	-1.37156	ACAT1	chr11:108009778:+	chr11_108139001_+;chr11_108139082_+
chr12:27845545-27845597:mpeak_18448|chr12_27677044_27845728_PPFIBP1_NM_+|	124.03	-1.64065	0.822245	-1.99533	0.0460071	0.160788	32.3446	22.2312	1.70773	43.1904	21.9043	26.1583	270.673	328.174	271.53	113.118	207.615	149.715	6.46656	-0.69716	0.887609	-1.58477	PPFIBP1	-	-
chr6:41038768-41038929:mpeak_73545|chr6_41035176_41040188_OARD1_NM_-|	86.9563	-1.51049	0.46314	-3.2614	0.00110862	0.0141971	11.9164	9.52765	14.5157	22.6235	16.1901	30.0543	199.174	171.498	188.705	129.571	106.664	143.036	6.42855	-0.937446	0.56059	-1.49804	OARD1	chr6:41038780:-;chr6:41038871:-	chr6_41071042_-
chr2:233428984-233429069:mpeak_51995|chr2_233415296_233445613_EIF4E2_NM_+|	49.6371	-2.24385	0.724675	-3.09635	0.00195916	0.02057	5.10703	7.41039	0	22.6235	7.61888	15.0271	97.0337	83.6316	113.564	79.1823	74.2841	90.1628	6.38146	-1.8546	0.272255	-2.12686	EIF4E2	-	-
chr9:116348576-116348644:mpeak_86931|chr9_116207008_116359047_RGS3_NM_+|	38.028	-2.04007	0.766396	-2.66191	0.00776997	0.0500895	1.70234	8.46902	9.39254	3.08503	9.5236	15.0271	105.545	68.8108	132.349	26.7369	42.8562	32.8371	6.37872	-0.498342	1.58221	-2.08056	RGS3	chr9:116348635:+	chr9_113586366_+
chr10:112362229-112362351:mpeak_12583|chr10_112327448_112363988_SMC3_NM_+|	38.3988	-2.7223	1.03241	-2.63683	0.00836841	0.0525481	0	4.23451	0	14.3968	7.61888	11.1312	61.2844	103.745	34.1547	55.5305	101.903	66.7872	6.37777	-2.96861	-0.17081	-2.7978	SMC3	-	-
chr10:101514501-101514599:mpeak_12120|chr10_101491957_101515381_CUTC_NM_+|	40.7115	-1.52428	0.686718	-2.21966	0.0264422	0.109769	8.51172	4.23451	3.41547	9.25508	9.5236	12.2443	107.248	93.1592	53.7936	69.9272	70.4747	46.7511	6.35785	-0.940759	0.44175	-1.38251	CUTC	chr10:101514505:+;chr10:101514598:+	chr10_99754749_+;chr10_99754797_+;chr10_99754839_+
chr2:111408674-111408728:mpeak_48863|chr2_111395736_111435684_BUB1_NM_-|	27.2724	-2.55223	1.11421	-2.29061	0.0219859	0.0974948	0	4.23451	0	1.02834	10.476	2.7828	66.3915	84.6902	50.3782	24.6802	44.7609	37.8461	6.30574	-1.75445	0.909014	-2.66346	BUB1	chr2:111408678:-	chr2_110651101_-
chr11:68160822-68160897:mpeak_15673|chr11_68080076_68216276_LRP5_NM_+|	57.6453	-1.59825	0.661971	-2.41438	0.0157619	0.0790623	8.51172	3.17588	11.9541	25.7085	12.3807	10.5746	166.83	105.863	102.464	84.324	94.2837	65.6741	6.30183	-1.04151	0.618947	-1.66046	LRP5	chr11:68160876:+	chr11_68393408_+
chr4:20307443-20307495:mpeak_63748|chr4_20255186_20620390_SLIT2_NM_+|	11.0707	-3.98934	1.05315	-3.78801	0.000151858	0.00429178	1.70234	2.11725	0.853867	6.17005	7.61888	11.6878	30.6422	24.3484	19.639	10.2834	13.333	4.45248	6.26222	-2.44661	1.41077	-3.85739	SLIT2	-	-
chr3:128369373-128369435:mpeak_60764|chr3_128339436_128369719_RPN1_NM_-|	536.602	-0.912921	0.361312	-2.52668	0.0115145	0.0653543	108.95	59.2831	85.3867	89.4657	59.0463	72.3528	1404.43	1158.14	1502.81	638.6	569.511	691.248	6.23853	0.199504	1.09788	-0.898373	RPN1	-	-
chr11:57439478-57439630:mpeak_14706|chr11_57435473_57467337_ZDHHC5_NM_+|	81.6851	-1.48638	0.627953	-2.36702	0.0179319	0.0859883	13.6188	9.52765	14.5157	30.8503	7.61888	12.2443	204.281	151.384	251.037	83.2957	99.9978	101.851	6.20768	-0.429253	1.0893	-1.51855	ZDHHC5	chr11:57439628:+	-
chr12:124197914-124197973:mpeak_22485|chr12_124196864_124242473_ATP6V0A2_NM_+|	79.5943	-1.40872	0.640163	-2.20056	0.0277672	0.113693	20.4281	4.23451	8.53867	19.5385	23.809	8.90496	178.746	138.68	217.736	110.033	114.283	110.199	6.20397	-0.654258	0.677908	-1.33217	ATP6V0A2	chr12:124197966:+	chr12_123713418_+
chr15:79179602-79179693:mpeak_30572|chr15_79165122_79189324_MORF4L1_NM_+|	727.23	-0.81591	0.402804	-2.02557	0.0428085	0.153377	105.545	92.1006	99.9025	168.648	88.5695	98.5112	1370.39	1628.17	1814.47	842.212	1262.83	1155.42	6.18215	-0.257653	0.561868	-0.819521	MORF4L1	-	-
chr8:117759472-117759538:mpeak_83637|chr8_117657342_117768062_EIF3H_NM_-|	291.102	-1.52183	0.515071	-2.9546	0.00313075	0.0277661	23.8328	51.8727	17.0773	84.324	129.521	71.2397	457.931	571.659	479.873	505.944	592.368	507.583	6.14675	-1.61946	-0.0893422	-1.53012	EIF3H	-	-
chr2:99437664-99437715:mpeak_48485|chr2_99411134_99552684_KIAA1211L_NM_-|	16.175	-2.44402	1.01471	-2.40858	0.0160145	0.0797813	1.70234	1.05863	4.26934	5.14171	1.90472	11.1312	27.2375	35.9933	51.232	12.3401	27.6184	14.4706	6.142	-1.3705	1.07243	-2.44293	KIAA1211L	-	-
chr16:1805801-1805933:mpeak_31467|chr16_1756220_1818703_MAPK8IP3_NM_+|	24.7143	-3.3098	1.18627	-2.7901	0.00526917	0.0385983	3.40469	0	0	4.11337	6.66652	4.45248	44.261	52.9314	69.1633	24.6802	45.7133	41.1855	6.1399	-2.16155	0.576206	-2.73775	MAPK8IP3	-	-
chr10:100201662-100201716:mpeak_12082|chr10_100177483_100206704_HPS1_NM_-|	34.4607	-2.48587	0.852657	-2.91545	0.00355181	0.0300136	6.80938	0	2.5616	3.08503	10.476	13.914	57.8797	70.928	100.756	56.5588	43.8086	46.7511	6.12311	-1.55185	0.641919	-2.19377	HPS1	chr10:100201661:-	chr10_98441907_-
chr1:39893913-39893968:mpeak_2004|chr1_39549838_39951209_MACF1_NM_+|	51.4994	-3.0827	0.9327	-3.30513	0.000949311	0.0130253	10.2141	1.05863	0	26.7369	15.2378	27.828	52.7727	138.68	85.3867	64.7855	76.1888	119.104	6.10788	-2.63045	0.0901047	-2.72055	MACF1	-	-
chr3:149688404-149688568:mpeak_61533|chr3_149684373_149688741_PFN2_NM_-|	850.723	-1.94898	0.446258	-4.3674	1.25735e-05	0.000805085	153.211	78.3384	122.957	341.409	180.948	242.104	2007.06	1695.92	2118.45	824.73	1208.55	1235.01	6.08968	-1.10863	0.832841	-1.94147	PFN2	-	-
chr19:12883881-12884119:mpeak_42555|chr19_12874245_12886434_HOOK2_NM_-|	147.161	-1.3249	0.489913	-2.70436	0.00684365	0.0460152	11.9164	39.1692	13.6619	25.7085	31.4279	28.3846	314.934	360.992	388.51	175.846	202.853	172.534	6.0828	-0.401454	0.949355	-1.35081	HOOK2	-	-
chr16:11120845-11121006:mpeak_32041|chr16_11038344_11272191_CLEC16A_NM_+|	46.4818	-1.80837	0.550642	-3.28411	0.00102304	0.0136599	5.10703	4.23451	9.39254	17.4818	12.3807	12.8009	108.95	93.1592	105.88	58.6155	75.2365	54.5429	6.08272	-1.18733	0.709119	-1.89645	CLEC16A	-	-
chr3:101383800-101383920:mpeak_60027|chr3_101370527_101395988_ZBTB11_NM_-|	60.4755	-2.50495	1.0202	-2.45535	0.0140748	0.0741183	6.80938	0	0	13.3684	9.5236	6.67872	132.783	154.56	48.6704	116.203	121.902	115.208	6.07957	-2.11858	-0.0724288	-2.04615	ZBTB11	-	-
chr10:75581742-75581832:mpeak_11258|chr10_75574263_75634349_CAMK2G_NM_-|	62.9564	-2.49898	0.82728	-3.02072	0.00252178	0.0241657	0	9.52765	0	10.2834	6.66652	12.2443	178.746	107.98	183.581	63.7572	98.0931	84.5972	6.0775	-1.61549	0.932325	-2.54782	CAMK2G	-	-
chr15:102261222-102261272:mpeak_31272|chr15_102194933_102264645_TARSL2_NM_-|	12.1337	-2.64745	1.3183	-2.00823	0.0446187	0.157476	1.70234	1.05863	0	4.11337	7.61888	1.66968	28.9399	14.8208	24.7622	17.4818	29.5232	13.914	6.04391	-2.27919	0.169692	-2.44888	TARSL2	chr15:102261218:-	-
chr7:55434423-55434508:mpeak_77984|chr7_55433140_55498918_LANCL2_NM_+|	39.0678	-1.94319	0.765206	-2.53944	0.0111031	0.0638825	5.10703	6.35176	0	9.25508	6.66652	5.5656	114.057	68.8108	102.464	51.4171	59.0463	40.0723	6.02393	-0.907022	0.922535	-1.82956	LANCL2	chr7:55434480:+	chr7_55366788_+
chr1:120539214-120539422:mpeak_4696|chr1_120459317_120612317_NOTCH2_NM_-|	312.058	-2.9377	0.338723	-8.67285	4.21435e-18	3.56197e-14	45.9633	52.9314	61.4785	89.4657	94.2837	100.181	1126.95	793.971	767.627	189.215	193.329	229.303	5.96504	-0.824104	2.13559	-2.95969	NOTCH2	chr1:120539214:-	-
chr17:7157896-7157946:mpeak_35743|chr17_7155371_7161906_ELP5_NM_+|	17.3403	-1.78367	0.902676	-1.97598	0.0481576	0.165526	0	1.05863	3.41547	4.11337	2.85708	5.5656	35.7492	34.9347	41.8395	21.5952	28.5708	28.3846	5.96422	-1.48641	0.518532	-2.00495	ELP5	-	-
chr10:11990387-11990518:mpeak_9512|chr10_11963306_12085169_UPF2_NM_-|	30.0546	-3.40443	0.887437	-3.83625	0.000124929	0.00382572	3.40469	2.11725	0	24.6802	20.9519	11.1312	47.6657	52.9314	38.424	55.5305	54.2845	49.5339	5.95803	-3.36171	-0.196885	-3.16483	UPF2	-	-
chr1:174969271-174969337:mpeak_6788|chr1_174968570_174979058_CACYBP_NM_+|	643.454	-0.947789	0.324042	-2.9249	0.00344572	0.0294471	90.2243	64.5763	63.1862	158.365	134.283	100.181	1200.15	1319.05	1140.77	1069.48	1271.4	1109.78	5.95597	-0.849658	0.0849605	-0.934619	CACYBP	-	chr1_175000188_+
chr3:142226008-142226167:mpeak_61337|chr3_142168444_142297668_ATR_NM_-|	21.8706	-2.90953	1.15542	-2.51816	0.011797	0.0662073	0	0	2.5616	7.19839	6.66652	6.67872	30.6422	74.1039	24.7622	23.6519	46.6656	39.5158	5.93383	-3.00357	0.237729	-3.2413	ATR	-	-
chr10:112356360-112356424:mpeak_12576|chr10_112327448_112363988_SMC3_NM_+|	41.579	-3.32779	0.942618	-3.53037	0.000414974	0.00772297	6.80938	1.05863	0	19.5385	24.7614	23.3755	61.2844	103.745	34.1547	55.5305	101.903	66.7872	5.92516	-3.10456	-0.17081	-2.93375	SMC3	chr10:112356419:+	chr10_110596659_+
chr20:60618690-60618753:mpeak_54584|chr20_60551391_60640866_TAF4_NM_-|	19.2135	-3.70097	1.08876	-3.39925	0.000675714	0.0104984	0	3.17588	0	4.11337	2.85708	6.67872	68.0938	53.99	39.2779	12.3401	19.9996	20.0362	5.90453	-2.10358	1.62332	-3.72691	TAF4	-	-
chr3:160135536-160135748:mpeak_61846|chr3_160117091_160151444_SMC4_NM_+|	193.262	-2.90281	0.606878	-4.78319	1.72537e-06	0.000228289	28.9399	13.7622	3.41547	163.506	143.806	120.217	257.054	329.233	198.951	311.588	381.896	366.773	5.87306	-3.21264	-0.433212	-2.77943	SMC4	chr3:160135744:+	chr3_160417729_+;chr3_160417775_+;chr3_160417918_+
chr1:9665172-9665229:mpeak_422|chr1_9648931_9673043_TMEM201_NM_+|	22.4992	-2.42811	0.90342	-2.68769	0.00719485	0.0476948	3.40469	2.11725	4.26934	7.19839	0.95236	13.3574	54.475	42.3451	70.0171	25.7085	26.6661	19.4796	5.86876	-1.13532	1.2153	-2.35061	TMEM201	chr1:9665226:+	chr1_9605173_+
chr8:101164048-101164128:mpeak_83187|chr8_101162838_101165521_POLR2K_NM_+|	106.46	-1.98594	0.507473	-3.91339	9.10105e-05	0.00310657	11.9164	7.41039	8.53867	60.6722	30.4755	50.647	170.234	129.153	176.751	188.187	198.091	245.443	5.8524	-2.34725	-0.407908	-1.93934	POLR2K	-	-
chr12:122821174-122821262:mpeak_22275|chr12_122757647_122907116_CLIP1_NM_-|	25.4034	-2.78875	1.23903	-2.25075	0.0244012	0.104161	0	2.11725	0	14.3968	1.90472	7.79184	23.8328	50.8141	34.1547	57.5871	57.1416	55.0995	5.83793	-3.50837	-0.642376	-2.86599	CLIP1	-	-
chr4:13615122-13615214:mpeak_63630|chr4_13571752_13629328_BOD1L1_NM_-|	14.6087	-3.7139	1.46345	-2.53777	0.0111561	0.0640269	0	2.11725	0	4.11337	9.5236	0.55656	34.0469	56.1072	18.7851	14.3968	22.8566	12.8009	5.83056	-2.74497	1.12196	-3.86692	BOD1L1	-	-
chr15:38618276-38618355:mpeak_28568|chr15_38545051_38643214_SPRED1_NM_+|	21.8068	-2.5128	1.2516	-2.00766	0.0446791	0.157476	1.70234	2.11725	0	7.19839	1.90472	16.6968	28.9399	53.99	15.3696	43.1904	37.142	53.4298	5.82851	-2.75587	-0.444415	-2.31146	SPRED1	-	chr15_38326154_+
chr6:7182240-7182321:mpeak_71979|chr6_7107829_7248743_RREB1_NM_+|	76.8266	-1.40523	0.495387	-2.83664	0.00455911	0.0354822	17.0234	6.35176	12.808	11.3118	10.476	12.2443	212.793	181.025	227.129	81.239	63.8081	85.7103	5.8271	0.0884271	1.42809	-1.33967	RREB1	-	-
chr17:80530493-80530571:mpeak_40050|chr17_80477593_80559178_FOXK2_NM_+|	192.575	-0.881874	0.399653	-2.2066	0.027342	0.112619	22.1305	26.4657	28.1776	28.7936	24.7614	35.0633	384.73	394.868	539.644	230.349	300.946	294.977	5.81954	-0.20699	0.675022	-0.882012	FOXK2	chr17:80530561:+	-
chr14:76525563-76525633:mpeak_27179|chr14_76452095_76550105_IFT43_NR_+mpeak_27179|chr14_76452095_76549800_IFT43_NM_+||	44.3673	-1.805	0.615469	-2.93272	0.00336005	0.0290246	5.10703	9.52765	4.26934	5.14171	11.4283	13.914	81.7126	121.742	122.103	51.4171	54.2845	51.7601	5.80666	-0.689361	1.04791	-1.73727	IFT43	chr14:76525614:+	chr14_76059271_+
chr9:5093692-5093762:mpeak_84724|chr9_4985244_5126683_JAK2_NM_+|	25.896	-3.06631	1.32875	-2.30766	0.021018	0.0947469	1.70234	0	0	6.17005	7.61888	8.90496	23.8328	44.4623	20.4928	56.5588	64.7605	76.2488	5.75194	-3.73671	-1.15391	-2.5828	JAK2	chr9:5093799:+	chr9_5093788_+
chr17:37487526-37487576:mpeak_37198|chr17_37417820_37557909_FBXL20_NM_-|	31.3892	-2.86326	0.828144	-3.45744	0.000545326	0.00917424	3.40469	0	2.5616	12.3401	20.9519	11.1312	42.5586	50.8141	63.1862	46.2754	59.9987	63.4479	5.71634	-2.89641	-0.116467	-2.77994	FBXL20	-	-
chr5:149764143-149764208:mpeak_70839|chr5_149737201_149779372_TCOF1_NM_+|	70.4432	-1.61213	0.745792	-2.16163	0.0306465	0.122297	5.10703	11.6449	20.4928	9.25508	13.333	2.22624	194.067	177.849	282.63	48.3321	44.7609	35.6199	5.69016	0.585862	2.34634	-1.76048	TCOF1	chr5:149764201:+	chr5_150384636_+
chr5:153773828-153773948:mpeak_70952|chr5_153570294_153796373_GALNT10_NM_+|	156.093	-0.962057	0.470436	-2.04503	0.0408515	0.148188	18.7258	26.4657	7.68481	37.0203	28.5708	22.2624	320.041	312.295	298	246.802	284.756	270.488	5.68357	-0.732479	0.214066	-0.946546	GALNT10	-	-
chrX:69593988-69594046:mpeak_89465|chrX_69509878_69639911_KIF4A_NM_+|	178.186	-1.33577	0.528041	-2.52966	0.0114172	0.0650695	32.3446	35.9933	21.3467	11.3118	27.6184	18.923	543.048	685.991	352.647	116.203	144.759	148.045	5.67019	0.632462	1.95127	-1.31881	KIF4A	-	-
chr22:19892565-19892853:mpeak_56047|chr22_19863330_19929515_TXNRD2_NM_-mpeak_56047|chr22_19863330_19929515_TXNRD2_NM_-||	46.2184	-1.69628	0.72163	-2.35063	0.0187418	0.0881501	8.51172	5.29314	0	6.17005	3.80944	6.12216	103.843	119.625	141.742	59.6438	44.7609	55.0995	5.66997	-0.222032	1.19513	-1.41716	TXNRD2	chr22:19892567:-;chr22:19892636:-;chr22:19892708:-;chr22:19892772:-	chr22_19905045_-;chr22_19905176_-;chr22_19905257_-
chr7:44608551-44608602:mpeak_77810|chr7_44605678_44614137_DDX56_NM_-|	138.245	-1.04748	0.533081	-1.96495	0.04942	0.168801	15.3211	22.2312	26.4699	22.6235	20.9519	7.79184	405.158	290.064	437.18	153.223	130.473	127.452	5.65366	0.317722	1.46165	-1.14393	DDX56	-	-
chr14:97321557-97321623:mpeak_27842|chr14_97263683_97347513_VRK1_NM_+|	54.3997	-1.95114	0.758227	-2.57329	0.0100737	0.0599176	3.40469	0	7.68481	24.6802	6.66652	15.0271	117.462	77.2798	102.464	95.6358	96.1884	106.303	5.59688	-2.06412	-0.00446615	-2.05965	VRK1	-	chr14_96855297_+
chr7:73668593-73668654:mpeak_78433|chr7_73646546_73668788_RFC2_NM_-|	223.935	-1.44021	0.715881	-2.0118	0.0442407	0.156791	20.4281	10.5863	49.5243	88.4374	24.7614	42.8551	490.275	435.096	518.298	330.098	302.851	374.009	5.57875	-0.95429	0.519738	-1.47403	RFC2	-	-
chr18:44407640-44407774:mpeak_41003|chr18_44392575_44497495_PIAS2_NM_-|	27.6597	-2.34979	1.12895	-2.08139	0.0373985	0.139617	0	3.17588	0	5.14171	7.61888	2.22624	49.368	68.8108	52.9398	24.6802	62.8558	55.0995	5.56786	-2.23847	0.262664	-2.50113	PIAS2	chr18:44407721:-	chr18_46827761_-
chr6:168363110-168363254:mpeak_76446|chr6_168227670_168370461_MLLT4_NM_+|	182.548	-1.42226	0.551046	-2.58102	0.00985076	0.0589543	18.7258	11.6449	45.255	30.8503	26.6661	42.2986	483.466	463.679	412.418	250.915	194.281	210.38	5.5625	-0.400379	1.05231	-1.45269	MLLT4	-	chr6_167962508_+
chr19:12884498-12884574:mpeak_42556|chr19_12874245_12886434_HOOK2_NM_-|	147.256	-1.62095	0.45553	-3.55839	0.00037313	0.00725287	23.8328	23.2898	11.9541	27.7652	42.8562	21.7059	314.934	360.992	388.51	175.846	202.853	172.534	5.55006	-0.644166	0.949355	-1.59352	HOOK2	-	chr19_12773684_-
chr15:78878976-78879037:mpeak_30553|chr15_78857861_78885433_CHRNA5_NM_+|	20.9048	-2.52325	1.18704	-2.12566	0.0335318	0.129322	0	0	2.5616	9.25508	0	3.89592	45.9633	40.2278	52.9398	28.7936	23.809	43.4117	5.52344	-2.36005	0.535122	-2.89518	CHRNA5	-	chr15_78586650_+
chr2:101186026-101186076:mpeak_48585|chr2_101179417_101192815_PDCL3_NM_+|	35.3349	-3.07717	1.31543	-2.33929	0.0193203	0.0898215	0	4.23451	0	14.3968	0	11.6878	69.7961	55.0486	106.733	50.3887	30.4755	81.2578	5.48563	-2.62293	0.514419	-3.13735	PDCL3	-	-
chr17:73562993-73563186:mpeak_39491|chr17_73521782_73570951_LLGL2_NM_+|	588.278	-2.10181	0.494557	-4.24989	2.13877e-05	0.00120177	120.866	66.6935	65.7478	82.2673	154.282	174.203	1278.46	1315.87	2025.37	525.483	665.7	584.388	5.4832	-0.69738	1.37952	-2.0769	LLGL2	-	-
chr4:7050745-7050806:mpeak_63518|chr4_7045155_7055788_TADA2B_NM_+|	76.3875	-1.27268	0.568172	-2.23995	0.0250939	0.105994	6.80938	13.7622	5.97707	9.25508	26.6661	11.6878	149.806	176.791	161.381	117.231	114.283	123	5.44053	-0.842596	0.460974	-1.30357	TADA2B	chr4:7050801:+	chr4_7049073_+
chr7:91707047-91707200:mpeak_78791|chr7_91570188_91739435_AKAP9_NM_+|	22.3471	-3.01329	0.98294	-3.06558	0.00217245	0.0219899	1.70234	4.23451	0	3.08503	5.71416	11.6878	56.1774	67.7522	40.1318	18.5102	35.2373	23.9321	5.42802	-1.78693	1.07863	-2.86556	AKAP9	-	chr7_92077794_+;chr7_92077849_+
chr15:69072746-69072880:mpeak_30159|chr15_69072481_69113261_ANP32A_NM_-|	325.262	-1.02436	0.336985	-3.0398	0.00236739	0.0231573	39.1539	30.7002	51.232	46.2754	47.618	59.5519	760.948	833.14	642.962	449.385	475.228	466.954	5.41276	-0.341691	0.684887	-1.02658	ANP32A	chr15:69072749:-	chr15_68780410_-;chr15_68780468_-
chr11:16947852-16947906:mpeak_13920|chr11_16810843_17035963_PLEKHA7_NM_-|	8.8429	-4.69668	1.42742	-3.29032	0.00100074	0.0134716	1.70234	0	0.853867	2.05668	2.85708	8.90496	13.6188	15.8794	41.8395	6.17005	6.66652	5.5656	5.37489	-2.43455	1.95479	-4.38933	PLEKHA7	-	-
chr14:75180178-75180328:mpeak_27071|chr14_75179849_75201584_FCF1_NM_+|	112.921	-2.08998	0.519504	-4.02304	5.74529e-05	0.00236874	15.3211	4.23451	12.808	53.4738	26.6661	50.0904	214.495	223.37	164.796	210.81	191.424	187.561	5.37011	-2.00862	0.0311355	-2.03976	FCF1	-	chr14_74713540_+;chr14_74713633_+
chr2:219411637-219411689:mpeak_51561|chr2_219319740_219433084_USP37_NM_-|	60.1461	-2.12386	1.08266	-1.96171	0.0497964	0.169709	5.10703	0	0	1.02834	11.4283	8.90496	81.7126	69.8694	134.057	127.514	155.235	126.896	5.3638	-2.06446	-0.52018	-1.54428	USP37	-	-
chr13:20221021-20221515:mpeak_22811|chr13_20207787_20245973_MPHOSPH8_NM_+|	81.2683	-2.37706	0.546347	-4.35083	1.35625e-05	0.000836717	5.10703	6.35176	6.83094	51.4171	47.618	37.8461	98.736	154.56	88.8022	147.053	182.853	148.045	5.34635	-2.90382	-0.482454	-2.42136	MPHOSPH8	-	chr13_19646931_+
chr2:191862931-191863029:mpeak_50784|chr2_191835443_191878976_STAT1_NM_-|	253.946	-0.849542	0.414381	-2.05015	0.0403498	0.147048	20.4281	37.052	40.9856	43.1904	25.7137	31.1674	566.881	620.356	659.186	282.794	412.372	307.221	5.33279	-0.0233368	0.881293	-0.904629	STAT1	-	-
chr12:49057231-49057296:mpeak_18989|chr12_49047958_49076035_KANSL2_NM_-|	72.6647	-1.74511	0.600816	-2.90457	0.00367758	0.0305934	13.6188	5.29314	8.53867	20.5668	9.5236	17.2534	188.96	128.094	199.805	69.9272	121.902	88.4931	5.31103	-0.78634	0.882684	-1.66902	KANSL2	-	chr12_48663425_-
chr12:111067969-111068108:mpeak_21599|chr12_111051831_111086847_TCTN1_NM_+|	58.181	-2.02411	0.68406	-2.95896	0.00308681	0.0275485	10.2141	4.23451	0.853867	21.5952	19.9996	18.923	71.4985	89.9833	127.226	121.344	80.9506	131.348	5.30032	-1.9836	-0.208695	-1.7749	TCTN1	chr12:111068062:+	chr12_110630209_+;chr12_110630276_+
chr18:33271025-33271161:mpeak_40852|chr18_33234532_33289587_GALNT1_NM_+|	185.283	-1.30966	0.59994	-2.18298	0.0290369	0.117595	6.80938	9.52765	13.6619	99.7491	40.9515	53.4298	149.806	272.067	149.427	426.762	504.751	496.452	5.25099	-2.69404	-1.32164	-1.37241	GALNT1	-	chr18_35691110_+
chr2:99988124-99988201:mpeak_48535|chr2_99953833_100015769_EIF5B_NM_+|	261.9	-1.87828	0.586978	-3.19992	0.00137467	0.0162955	11.9164	35.9933	11.1003	88.4374	103.807	125.783	316.636	514.493	297.146	395.912	623.796	617.782	5.23011	-2.43012	-0.537367	-1.89275	EIF5B	chr2:99988193:+	chr2_99371664_+;chr2_99371724_+
chr10:35320498-35320556:mpeak_10270|chr10_35299370_35379570_CUL2_NM_-|	16.1967	-3.29773	1.34929	-2.44404	0.0145237	0.0755877	0	1.05863	0	6.17005	6.66652	8.90496	15.3211	27.5243	17.9312	29.8219	31.4279	49.5339	5.2255	-4.36019	-0.866156	-3.49403	CUL2	-	chr10_35031609_-
chr12:105508131-105508209:mpeak_21319|chr12_105501491_105560641_KIAA1033_NM_+|	41.6483	-3.91989	1.37772	-2.8452	0.0044383	0.0347983	3.40469	0	0	29.8219	0.95236	15.5837	64.6891	66.6935	65.7478	96.6641	93.3313	62.8913	5.18138	-3.76722	-0.359341	-3.40788	KIAA1033	-	-
chr15:42853810-42853910:mpeak_28867|chr15_42841010_42858804_HAUS2_NM_+|	100.807	-1.76172	0.7655	-2.3014	0.021369	0.0954604	0	0	7.68481	13.3684	17.1425	19.4796	134.485	210.667	102.464	234.462	199.996	269.932	5.15049	-2.70157	-0.654111	-2.04746	HAUS2	chr15:42853888:+	chr15_42561706_+
chr17:2295717-2295858:mpeak_35382|chr17_2290943_2304258_MNT_NM_-|	33.8257	-2.59262	0.695166	-3.72949	0.000191867	0.00502856	1.70234	8.46902	2.5616	10.2834	9.5236	15.0271	100.438	59.2831	88.8022	28.7936	40.9515	40.0723	5.12344	-1.45193	1.17828	-2.63021	MNT	-	chr17_2392502_-
chr17:2294824-2294950:mpeak_35381|chr17_2290943_2304258_MNT_NM_-|	32.5672	-1.65156	0.790367	-2.08961	0.0366527	0.137257	1.70234	8.46902	2.5616	10.2834	6.66652	2.7828	100.438	59.2831	88.8022	28.7936	40.9515	40.0723	5.12344	-0.632023	1.17828	-1.8103	MNT	-	-
chr3:196013310-196013385:mpeak_62851|chr3_195965765_196014584_PCYT1A_NM_-|	14.0876	-3.13131	1.0979	-2.85208	0.00434347	0.0342453	1.70234	0	1.70773	9.25508	1.90472	3.89592	27.2375	31.7588	40.9856	17.4818	18.0948	15.0271	5.11604	-2.14243	0.982423	-3.12486	PCYT1A	chr3:196013309:-	chr3_196286429_-;chr3_196286449_-
chr1:214830269-214830404:mpeak_8141|chr1_214776531_214836933_CENPF_NM_+|	59.5068	-1.58424	0.784217	-2.02016	0.0433671	0.154645	10.2141	2.11725	0	9.25508	9.5236	6.67872	115.759	159.853	86.2406	88.4374	108.569	117.434	5.11174	-1.04576	0.202615	-1.24837	CENPF	-	chr1_214657061_+
chr19:56109409-56109561:mpeak_45264|chr19_56105012_56110893_FIZ1_NM_-|	67.1028	-2.16787	0.668975	-3.24059	0.00119284	0.0148481	10.2141	0	2.5616	16.4535	14.2854	15.0271	93.629	127.035	154.55	128.543	110.474	132.461	5.10735	-1.84088	0.0144385	-1.85532	FIZ1	-	-
chr3:146234745-146234928:mpeak_61425|chr3_146233888_146262628_PLSCR1_NM_-|	35.8987	-2.37734	0.609131	-3.90284	9.50703e-05	0.00320133	1.70234	5.29314	6.83094	10.2834	8.57124	13.3574	100.438	83.6316	87.0945	38.0486	43.8086	31.7239	5.09891	-1.22018	1.25544	-2.47562	PLSCR1	chr3:146234808:-	-
chr5:169015390-169015587:mpeak_71191|chr5_169010637_169031063_SPDL1_NM_+|	29.2615	-2.95567	1.24529	-2.37349	0.0176209	0.0852503	1.70234	1.05863	0	26.7369	6.66652	15.0271	39.1539	25.4071	17.0773	48.3321	94.2837	75.6922	5.07293	-4.13267	-1.41905	-2.71362	SPDL1	-	chr5_169588444_+
chr9:140697595-140697712:mpeak_88245|chr9_140513443_140729224_EHMT1_NM_+|	120.244	-1.59182	0.506437	-3.14318	0.00167123	0.0185614	17.0234	15.8794	20.4928	13.3684	10.476	18.3665	400.051	233.957	429.495	95.6358	95.236	92.9456	5.02074	0.339108	1.90579	-1.56668	EHMT1	chr9:140697647:+	-
chr22:42072971-42073165:mpeak_57085|chr22_42071199_42084913_NHP2L1_NM_-|	558.352	-1.24676	0.401433	-3.10578	0.00189781	0.0202273	32.3446	56.1072	41.8395	176.875	111.426	138.584	689.45	900.892	1010.13	1075.65	1422.83	1044.11	5.0103	-1.7121	-0.446029	-1.26608	NHP2L1	-	-
chr2:15744549-15744626:mpeak_45926|chr2_15731744_15770899_DDX1_NM_+|	82.5892	-1.62579	0.484114	-3.35827	0.000784318	0.0115489	11.9164	7.41039	9.39254	18.5102	19.0472	13.914	165.127	197.963	210.905	92.5508	128.569	115.765	5.00341	-0.841747	0.768789	-1.61054	DDX1	chr2:15744634:+	chr2_15604481_+;chr2_15604502_+
chr15:28524951-28525017:mpeak_28386|chr15_28357181_28567298_HERC2_NM_-|	63.5046	-2.27506	0.672123	-3.38489	0.000712067	0.0108635	5.10703	10.5863	12.808	8.22673	12.3807	10.0181	284.292	181.025	115.272	31.8786	54.2845	36.1764	4.90904	-0.103705	2.24663	-2.35033	HERC2	chr15:28524966:-	chr15_28279820_-
chr18:20516836-20516930:mpeak_40583|chr18_20513294_20606105_RBBP8_NM_+|	38.2677	-3.10446	1.39424	-2.22663	0.0259717	0.108294	1.70234	0	0	15.4251	13.333	5.00904	32.3446	55.0486	17.0773	99.7491	130.473	89.0496	4.88849	-4.31003	-1.61169	-2.69834	RBBP8	-	-
chr10:118699974-118700065:mpeak_12793|chr10_118646077_118886097_SHTN1_NM_-|	65.1758	-1.66206	0.72969	-2.27777	0.0227405	0.0996527	8.51172	5.29314	0.853867	27.7652	18.0948	11.1312	71.4985	130.211	98.1948	111.061	138.092	161.402	4.8878	-1.95898	-0.453075	-1.50591	SHTN1	-	chr10_116940492_-
chr5:138221888-138221954:mpeak_70307|chr5_138089084_138269490_CTNNA1_NM_+|	631.437	-0.958393	0.414295	-2.31331	0.0207056	0.0939364	132.783	64.5763	86.2406	47.3037	33.3326	46.1945	2141.55	1545.6	2120.15	387.685	480.942	490.886	4.88351	1.16095	2.09478	-0.933826	CTNNA1	-	chr5_138886281_+
chr17:5268307-5268473:mpeak_35643|chr17_5185557_5286888_RABEP1_NM_+|	34.6919	-2.9349	1.06521	-2.75522	0.0058653	0.0417415	1.70234	2.11725	0	26.7369	5.71416	20.0362	30.6422	52.9314	35.0086	78.154	71.427	91.8324	4.83159	-3.78047	-1.02562	-2.75485	RABEP1	-	chr17_5365191_+
chr12:109921661-109921789:mpeak_21492|chr12_109915427_109972395_UBE3B_NM_+|	111.318	-1.4245	0.588407	-2.42094	0.0154805	0.0783687	13.6188	10.5863	10.2464	31.8786	23.809	12.2443	270.673	188.436	254.452	124.429	232.376	163.072	4.8281	-0.979525	0.456865	-1.43639	UBE3B	-	chr12_109483962_+
chr8:68255392-68255522:mpeak_82382|chr8_68111333_68255912_ARFGEF1_NM_-|	23.0224	-2.64718	1.08644	-2.43656	0.0148276	0.0766345	3.40469	1.05863	0	7.19839	7.61888	3.89592	68.0938	33.8761	36.7163	28.7936	53.3322	32.2805	4.82743	-2.06787	0.277658	-2.34553	ARFGEF1	-	-
chr7:104731658-104731768:mpeak_79410|chr7_104654636_104752271_KMT2E_NM_+|	16.2822	-3.16828	1.38617	-2.28564	0.0222755	0.0984244	0	0	0.853867	5.14171	11.4283	8.3484	20.4281	23.2898	9.39254	25.7085	45.7133	45.0814	4.82316	-4.86706	-1.1333	-3.73376	KMT2E	-	chr7_105091294_+
chr15:75714696-75714759:mpeak_30430|chr15_75664550_75748124_SIN3A_NM_-|	52.372	-1.63376	0.698701	-2.33828	0.0193726	0.0898704	0	7.41039	4.26934	4.11337	11.4283	9.46152	125.974	87.8661	149.427	64.7855	75.2365	88.4931	4.82279	-1.09811	0.668739	-1.76685	SIN3A	chr15:75714701:-	chr15_75422361_-
chr9:97825897-97826001:mpeak_86219|chr9_97488950_97848963_C9orf3_NM_+|	52.7846	-2.36779	0.996052	-2.37717	0.017446	0.08461	5.10703	0	0	1.02834	4.7618	8.90496	102.141	113.273	103.318	92.5508	97.1407	105.19	4.8069	-1.52478	0.112208	-1.63699	C9orf3	-	-
chr15:69727986-69728090:mpeak_30189|chr15_69706584_69740130_KIF23_NM_+|	41.577	-1.61486	0.73988	-2.1826	0.0290652	0.117608	3.40469	3.17588	2.5616	15.4251	5.71416	15.5837	47.6657	77.2798	65.7478	85.3524	72.3794	104.633	4.79418	-2.00607	-0.460322	-1.54575	KIF23	-	-
chr1:222826568-222826689:mpeak_8309|chr1_222791443_222838650_MIA3_NM_+|	34.7031	-4.03702	1.129	-3.57575	0.00034922	0.00706121	3.40469	0	0	9.25508	10.476	10.0181	71.4985	87.8661	53.7936	43.1904	65.7129	61.2216	4.79178	-3.12725	0.325331	-3.45258	MIA3	-	-
chr12:124114935-124114993:mpeak_22469|chr12_124106467_124118323_EIF2B1_NM_-|	127.744	-1.15889	0.491576	-2.3575	0.0183987	0.087153	15.3211	9.52765	14.5157	26.7369	12.3807	23.3755	270.673	341.937	218.59	179.96	202.853	217.059	4.73587	-0.666802	0.470542	-1.13734	EIF2B1	-	-
chr2:61528527-61528594:mpeak_47342|chr2_61415844_61697849_USP34_NM_-|	85.4291	-1.47741	0.671181	-2.20122	0.0277207	0.113693	3.40469	10.5863	5.97707	9.25508	29.5232	30.6108	141.295	178.908	101.61	139.854	197.139	176.986	4.73386	-1.79702	-0.285107	-1.51191	USP34	-	-
chr15:93543801-93543972:mpeak_31083|chr15_93443550_93567601_CHD2_NM_+|	36.7211	-3.17008	1.1231	-2.82263	0.00476319	0.036499	3.40469	0	0	3.08503	8.57124	6.67872	64.6891	68.8108	83.679	62.7288	73.3317	65.6741	4.70307	-2.429	0.106425	-2.53543	CHD2	chr15:93543956:+	chr15_93000726_+;chr15_93000764_+
chr13:114017538-114017592:mpeak_24743|chr13_113978892_114018463_GRTP1_NM_-|	14.4127	-3.1181	1.37652	-2.2652	0.0235003	0.102173	1.70234	1.05863	0	8.22673	5.71416	1.66968	25.5352	11.6449	51.232	20.5668	19.9996	25.6018	4.68427	-2.49928	0.418107	-2.91738	GRTP1	-	chr13_113363226_-
chr7:91670106-91670219:mpeak_78786|chr7_91570188_91739435_AKAP9_NM_+|	21.6893	-2.41507	0.940916	-2.56673	0.0102663	0.0605521	1.70234	0	3.41547	3.08503	4.7618	5.5656	56.1774	67.7522	40.1318	18.5102	35.2373	23.9321	4.67918	-1.38997	1.07863	-2.4686	AKAP9	-	chr7_92040824_+
chr9:5098290-5098345:mpeak_84730|chr9_4985244_5126683_JAK2_NM_+|	26.5383	-2.51208	1.17537	-2.13726	0.0325766	0.127294	1.70234	1.05863	0	10.2834	12.3807	6.67872	23.8328	44.4623	20.4928	56.5588	64.7605	76.2488	4.66444	-3.40976	-1.15391	-2.25585	JAK2	-	chr9_5098333_+
chr1:33234446-33234556:mpeak_1650|chr1_33207511_33238465_KIAA1522_NM_+|	83.8702	-2.2524	0.762109	-2.95548	0.00312181	0.0277451	0	0	6.83094	14.3968	16.1901	16.1402	146.402	158.794	135.765	152.195	242.852	116.878	4.64731	-2.77411	-0.21528	-2.55883	KIAA1522	chr1:33234497:+	chr1_32768893_+;chr1_32768962_+
chr18:13731469-13731547:mpeak_40467|chr18_13726658_13759940_RNMT_NM_+|	89.0715	-1.71027	0.593624	-2.88107	0.00396327	0.0321474	10.2141	5.29314	4.26934	31.8786	28.5708	17.2534	103.843	182.084	140.034	153.223	185.71	206.484	4.6428	-1.97418	-0.356638	-1.61754	RNMT	-	chr18_13731548_+
chr4:107239461-107239685:mpeak_65531|chr4_107236766_107268682_AIMP1_NM_+|	78.1805	-2.57448	0.572422	-4.49752	6.87503e-06	0.000562191	1.70234	9.52765	2.5616	50.3887	48.5704	41.742	88.5219	123.859	85.3867	133.684	175.234	176.986	4.63166	-3.35077	-0.706485	-2.64429	AIMP1	-	chr4_106318459_+
chr11:34164984-34165082:mpeak_14301|chr11_34127110_34167630_NAT10_NM_+|	589.994	-0.930099	0.305495	-3.04457	0.00233017	0.0229007	102.141	65.6349	82.8251	35.992	42.8562	31.7239	1891.31	1641.93	1919.49	432.932	432.372	400.723	4.59588	1.1804	2.10667	-0.926268	NAT10	-	chr11_34143523_+
chr16:14698012-14698185:mpeak_32211|chr16_14530629_14724128_PARN_NM_-|	99.9014	-1.25191	0.466436	-2.68399	0.00727501	0.0480378	17.0234	10.5863	5.97707	10.2834	12.3807	14.4706	231.519	243.484	266.407	132.656	130.473	123.556	4.53013	-0.144873	0.939109	-1.08398	PARN	-	-
chr7:154791842-154791908:mpeak_80706|chr7_154735872_154794682_PAXIP1_NM_-|	42.4534	-2.25167	0.951161	-2.36729	0.0179191	0.0859883	1.70234	7.41039	0	11.3118	10.476	3.89592	100.438	127.035	74.2865	29.8219	72.3794	70.6832	4.52979	-1.49489	0.803594	-2.29849	PAXIP1	-	-
chr14:23420699-23420791:mpeak_25055|chr14_23415917_23426351_HAUS4_NM_-|	134.783	-1.22725	0.578457	-2.12159	0.0338719	0.130137	10.2141	23.2898	11.1003	11.3118	31.4279	14.4706	337.064	265.715	384.24	198.47	187.615	142.479	4.51907	-0.359095	0.901	-1.2601	HAUS4	chr14:23420712:-	chr14_22951504_-
chr6:18150748-18150892:mpeak_72324|chr6_18131011_18155396_TPMT_NM_-|	27.352	-3.12179	0.956804	-3.26272	0.00110347	0.014174	0	1.05863	2.5616	16.4535	12.3807	18.3665	34.0469	32.8174	54.6475	58.6155	66.6652	30.6108	4.46898	-3.70465	-0.359445	-3.34521	TPMT	-	-
chr20:47539090-47539146:mpeak_53964|chr20_47538274_47649559_ARFGEF2_NM_+|	60.6704	-1.86816	0.726771	-2.5705	0.0101552	0.0602463	0	6.35176	5.1232	21.5952	9.5236	6.12216	129.378	106.921	150.281	111.061	80.9506	100.737	4.45249	-1.6984	0.401104	-2.0995	ARFGEF2	-	chr20_48922604_+
chr18:45379619-45379820:mpeak_41037|chr18_45368321_45457517_SMAD2_NM_-|	103.672	-1.63677	0.510113	-3.20864	0.00133366	0.0160572	10.2141	6.35176	3.41547	25.7085	27.6184	32.2805	153.211	175.732	120.395	220.065	231.424	237.651	4.44683	-2.09909	-0.616994	-1.48209	SMAD2	-	chr18_47853303_-;chr18_47853349_-;chr18_47853392_-
chr1:38027679-38027781:mpeak_1900|chr1_38022519_38030626_DNALI1_NM_+|	28.8144	-2.90896	0.990528	-2.93678	0.00331636	0.0287781	5.10703	0	0.853867	4.11337	9.5236	6.67872	59.5821	52.9314	88.8022	22.6235	50.4751	45.0814	4.44146	-1.76899	0.768474	-2.53747	DNALI1	-	chr1_37562085_+;chr1_37562139_+
chr12:109690328-109690379:mpeak_21480|chr12_109577201_109704040_ACACB_NM_+|	28.0691	-2.89455	1.0645	-2.71917	0.00654456	0.0445368	0	0	3.41547	2.05668	7.61888	2.7828	51.0703	73.0453	107.587	23.6519	39.9991	25.6018	4.42222	-1.86696	1.37631	-3.24327	ACACB	chr12:109690383:+	chr12_109252574_+
chr5:70358521-70358636:mpeak_68431|chr5_70331623_70363497_GTF2H2_NM_-|	47.677	-1.59921	0.776236	-2.06021	0.0393783	0.144518	8.51172	2.11725	2.5616	4.11337	7.61888	14.4706	136.188	95.2765	67.4555	87.409	72.3794	74.0225	4.41275	-0.990214	0.354415	-1.34463	GTF2H2	-	-
chr6:144768410-144768461:mpeak_75747|chr6_144612872_145172124_UTRN_NM_+|	17.2044	-4.11308	1.50496	-2.73301	0.00627589	0.0434429	1.70234	0	0	4.11337	0	8.90496	34.0469	57.1659	24.7622	22.6235	31.4279	21.7059	4.40357	-2.93495	0.614357	-3.54931	UTRN	-	chr6_144447282_+
chr1:16932499-16932666:mpeak_771|chr1_16890681_16940100_NBPF1_NM_-|	202.748	-1.56794	0.520248	-3.01384	0.00257968	0.0244445	37.4516	8.46902	21.3467	25.7085	28.5708	37.2895	634.975	479.558	415.833	262.227	239.995	241.547	4.3955	-0.444952	1.04095	-1.4859	NBPF1	chr1:16932511:-;chr1:16932613:-	chr1_16606017_-;chr1_16606055_-
chr15:93485048-93485136:mpeak_31070|chr15_93443550_93567601_CHD2_NM_+|	36.6299	-2.63599	1.01711	-2.59165	0.00955162	0.057747	0	3.17588	0	3.08503	3.80944	10.5746	64.6891	68.8108	83.679	62.7288	73.3317	65.6741	4.387	-2.45958	0.106425	-2.566	CHD2	-	chr15_92941825_+
chr11:13443305-13443396:mpeak_13848|chr11_13410688_13484844_BTBD10_NM_-|	61.0022	-1.55421	0.604797	-2.56981	0.0101756	0.060269	5.10703	8.46902	5.1232	7.19839	12.3807	12.8009	148.104	160.911	118.688	60.6722	85.7124	106.86	4.37202	-0.79212	0.75608	-1.5482	BTBD10	-	-
chr2:48039980-48040107:mpeak_47069|chr2_48035386_48132932_FBXO11_NM_-|	26.9312	-2.86647	0.773694	-3.70491	0.000211463	0.00525673	1.70234	4.23451	0.853867	11.3118	10.476	16.1402	54.475	49.7555	51.232	30.8503	47.618	44.5248	4.36808	-2.48163	0.33799	-2.81962	FBXO11	chr2:48039932:-;chr2:48039988:-;chr2:48040054:-	chr2_47812794_-;chr2_47812851_-;chr2_47812893_-
chr22:21198076-21198140:mpeak_56114|chr22_21062386_21213100_PI4KA_NM_-|	41.8162	-3.00219	0.837769	-3.58356	0.000338948	0.00697029	8.51172	3.17588	0	5.14171	2.85708	5.5656	160.02	103.745	138.327	31.8786	24.7614	17.8099	4.36004	-0.214845	2.43319	-2.64803	PI4KA	-	-
chr9:85630712-85630788:mpeak_85795|chr9_85597697_85678043_RASEF_NM_-|	106.695	-1.48946	0.720772	-2.06648	0.0387834	0.143143	8.51172	5.29314	0	22.6235	9.5236	18.923	156.616	209.608	110.149	238.575	256.185	244.33	4.34687	-1.8873	-0.633659	-1.25365	RASEF	-	-
chr14:50099344-50099397:mpeak_25746|chr14_50092766_50101948_DNAAF2_NM_-|	33.9553	-3.1066	1.22619	-2.53353	0.0112919	0.0646609	3.40469	0	0	10.2834	0	3.33936	69.7961	74.1039	91.3638	50.3887	48.5704	56.2126	4.34154	-2.00043	0.600414	-2.60084	DNAAF2	-	-
chr2:98392300-98392351:mpeak_48443|chr2_98373846_98612354_TMEM131_NM_-|	102.664	-1.64203	0.739446	-2.22062	0.0263764	0.109604	20.4281	7.41039	5.97707	9.25508	9.5236	26.7149	234.924	374.754	169.92	107.976	127.616	137.47	4.33757	-0.427974	1.06331	-1.49129	TMEM131	-	-
chr19:15308049-15308114:mpeak_42729|chr19_15272525_15311792_NOTCH3_NM_-|	82.4576	-2.86209	0.552125	-5.18377	2.17444e-07	6.33737e-05	11.9164	9.52765	10.2464	13.3684	20.9519	18.923	219.602	178.908	333.008	47.3037	69.5223	56.2126	4.33215	-0.748554	2.0798	-2.82836	NOTCH3	chr19:15308063:-	chr19_15197253_-
chr15:80455424-80455482:mpeak_30612|chr15_80445232_80478471_FAH_NM_+|	40.8563	-1.86029	0.778649	-2.38912	0.0168886	0.0825934	0	2.11725	6.83094	3.08503	6.66652	8.3484	97.0337	76.2212	137.473	43.1904	51.4274	57.8823	4.31963	-1.01632	1.02684	-2.04316	FAH	-	chr15_80163132_+
chr19:47852769-47852850:mpeak_44469|chr19_47852537_47885236_DHX34_NM_+|	17.2752	-3.37353	1.30265	-2.58974	0.0096049	0.0579034	0	0	1.70773	9.25508	1.90472	3.33936	59.5821	27.5243	31.5931	31.8786	17.1425	23.3755	4.31611	-3.08581	0.71332	-3.79913	DHX34	-	chr19_47349580_+
chr22:33895931-33895990:mpeak_56682|chr22_33670610_34316416_LARGE_NM_-|	55.5953	-2.42756	0.554891	-4.37484	1.21524e-05	0.00078406	3.40469	6.35176	5.97707	17.4818	24.7614	14.4706	115.759	116.449	134.057	65.8139	75.2365	87.38	4.29566	-1.84986	0.681136	-2.53099	LARGE	-	-
chr10:101950522-101950581:mpeak_12150|chr10_101949384_101989344_CHUK_NM_-|	50.2367	-2.55669	1.05541	-2.42247	0.0154156	0.0782068	0	4.23451	0	1.02834	8.57124	13.914	136.188	79.3971	80.2635	83.2957	108.569	87.38	4.29393	-2.47323	0.0833271	-2.55656	CHUK	-	-
chr1:10596678-10596728:mpeak_515|chr1_10535002_10689587_PEX14_NM_+|	19.7351	-3.75675	1.45156	-2.58808	0.00965131	0.0581004	1.70234	0	0	1.02834	1.90472	10.0181	30.6422	42.3451	46.1088	25.7085	42.8562	34.5067	4.28816	-2.92748	0.208481	-3.13597	PEX14	-	-
chr15:85666344-85666433:mpeak_30808|chr15_85523743_85681027_PDE8A_NM_+|	29.4186	-5.28151	1.35558	-3.89612	9.77454e-05	0.00326539	1.70234	0	0	27.7652	12.3807	26.1583	28.9399	65.6349	24.7622	61.7005	53.3322	50.647	4.27951	-5.28351	-0.473356	-4.81015	PDE8A	-	-
chr21:44395569-44395682:mpeak_55550|chr21_44394619_44449999_PKNOX1_NM_+|	35.333	-2.97858	1.18642	-2.51057	0.0120537	0.067069	3.40469	0	0	6.17005	1.90472	4.45248	62.9868	70.928	105.026	50.3887	71.427	47.3076	4.27473	-1.87947	0.498575	-2.37805	PKNOX1	chr21:44395683:+	chr21_42975571_+
chr1:204240440-204240590:mpeak_7704|chr1_204191907_204329057_PLEKHA6_NM_-|	85.0625	-1.22766	0.576814	-2.12835	0.0333078	0.128901	10.2141	13.7622	2.5616	9.25508	9.5236	12.8009	160.02	242.426	218.59	106.948	119.997	114.651	4.27315	-0.250941	0.862385	-1.11333	PLEKHA6	-	-
chr20:61559970-61560087:mpeak_54685|chr20_61513766_61569304_DIDO1_NM_-|	70.3894	-2.62957	0.773943	-3.39763	0.000679728	0.0105414	0	11.6449	5.1232	9.25508	16.1901	12.2443	297.91	186.318	107.587	79.1823	68.5699	50.647	4.25	-1.16844	1.57674	-2.74519	DIDO1	chr20:61559973:-;chr20:61560035:-	chr20_62928622_-;chr20_62928685_-
chr1:151866729-151866789:mpeak_5652|chr1_151847404_151882361_THEM4_NM_-|	13.5093	-3.05129	1.42284	-2.1445	0.0319927	0.125944	0	0	0.853867	6.17005	7.61888	1.66968	15.3211	25.4071	19.639	31.8786	19.0472	34.5067	4.24337	-4.17825	-0.501023	-3.67723	THEM4	chr1:151866730:-	chr1_151894257_-
chr20:47308855-47309167:mpeak_53944|chr20_47242465_47444420_PREX1_NM_-|	1039.16	-1.12012	0.401716	-2.78833	0.00529808	0.0387365	131.081	132.328	108.441	86.3807	100.95	93.5021	3387.67	1754.15	3622.11	1007.77	971.407	1074.16	4.24297	0.405009	1.52119	-1.11618	PREX1	chr20:47308861:-;chr20:47309009:-;chr20:47309116:-	chr20_48692324_-;chr20_48692474_-;chr20_48692574_-
chr2:136530051-136530125:mpeak_49519|chr2_136499188_136540318_UBXN4_NM_+|	78.9495	-2.41432	0.777729	-3.10432	0.00190719	0.0202418	1.70234	8.46902	0	38.0486	19.9996	18.3665	144.699	138.68	76.8481	159.393	164.758	176.43	4.23539	-2.90934	-0.474695	-2.43464	UBXN4	-	chr2_135772534_+
chr1:214795416-214795633:mpeak_8120|chr1_214776531_214836933_CENPF_NM_+|	65.1763	-2.83397	0.628571	-4.50859	6.52613e-06	0.000561465	5.10703	8.46902	1.70773	23.6519	32.3802	34.5067	115.759	159.853	86.2406	88.4374	108.569	117.434	4.22376	-2.56653	0.202615	-2.76915	CENPF	-	chr1_214622187_+;chr1_214622212_+
chr1:150905349-150905407:mpeak_5451|chr1_150898814_150936722_SETDB1_NM_+|	98.5544	-1.92925	0.68989	-2.79647	0.00516646	0.0382038	6.80938	9.52765	17.9312	8.22673	7.61888	30.6108	292.803	258.305	260.43	98.7208	100.95	90.7193	4.22263	-0.439006	1.48267	-1.92167	SETDB1	chr1:150905402:+	chr1_150932924_+
chr5:176893902-176893986:mpeak_71496|chr5_176884504_176900694_DBN1_NM_-|	54.1445	-3.37176	0.793205	-4.2508	2.13004e-05	0.00120177	8.51172	2.11725	0	19.5385	19.9996	9.46152	142.997	149.266	87.0945	75.0689	66.6652	69.0135	4.20275	-2.20477	0.848043	-3.05281	DBN1	chr5:176893932:-	-
chr3:25786986-25787115:mpeak_58168|chr3_25761126_25831530_NGLY1_NM_-|	25.0471	-3.10347	1.05543	-2.94049	0.00327692	0.0285237	3.40469	1.05863	0	3.08503	6.66652	10.5746	45.9633	74.1039	39.2779	41.1337	41.9038	33.3936	4.20156	-2.18715	0.452678	-2.63983	NGLY1	-	chr3_25745495_-
chr10:29944972-29945030:mpeak_10107|chr10_29747262_30024730_SVIL_NM_-|	12.6595	-3.63393	1.35946	-2.67306	0.00751625	0.0490542	1.70234	0	0.853867	1.02834	7.61888	5.00904	40.8563	31.7588	18.7851	6.17005	18.0948	20.0362	4.19509	-2.41748	1.04486	-3.46234	SVIL	-	-
chr12:39726140-39726225:mpeak_18676|chr12_39688319_39837192_KIF21A_NM_-|	45.3332	-1.91302	0.965516	-1.98134	0.0475532	0.164317	1.70234	12.7035	0.853867	12.3401	2.85708	7.79184	161.723	133.387	69.1633	33.9353	61.9034	45.6379	4.18909	-0.591215	1.36446	-1.95567	KIF21A	-	-
chr10:112640982-112641140:mpeak_12587|chr10_112631552_112657785_PDCD4_NM_+|	81.8325	-1.67588	0.760476	-2.20373	0.0275434	0.113228	6.80938	4.23451	0	15.4251	14.2854	11.1312	141.295	175.732	78.5558	160.421	210.472	163.629	4.18771	-1.8868	-0.434269	-1.45253	PDCD4	-	chr10_110881365_+;chr10_110881381_+
chr9:37464554-37464626:mpeak_85350|chr9_37442552_37465407_ZBTB5_NM_-|	51.3934	-1.65485	0.649671	-2.54721	0.0108588	0.0629697	6.80938	3.17588	5.97707	6.17005	8.57124	9.46152	107.248	98.4523	176.751	63.7572	68.5699	61.7782	4.1737	-0.600503	0.978434	-1.57894	ZBTB5	chr9:37464552:-	chr9_37464557_-
chr7:56125598-56125802:mpeak_78024|chr7_56119377_56130705_CCT6A_NM_+|	1130.5	-0.744648	0.318911	-2.33497	0.0195451	0.0903694	76.6055	111.156	103.318	138.826	172.377	105.19	2315.19	2429.55	2245.67	1906.55	2162.81	1798.8	4.16398	-0.516534	0.252469	-0.769003	CCT6A	-	chr7_56058029_+;chr7_56058098_+
chr17:57105201-57105288:mpeak_38371|chr17_57060282_57184266_TRIM37_NM_-|	40.7375	-2.1645	0.915824	-2.36344	0.018106	0.0863123	3.40469	2.11725	0	14.3968	7.61888	5.5656	78.3079	75.1625	46.1088	77.1256	93.3313	85.7103	4.15019	-2.32044	-0.360124	-1.96032	TRIM37	-	-
chr16:4494648-4494702:mpeak_31827|chr16_4475805_4505546_DNAJA3_NM_+|	193.746	-1.23398	0.457791	-2.69552	0.0070279	0.0467347	30.6422	16.938	12.808	27.7652	17.1425	22.819	573.69	384.282	502.074	222.122	258.09	256.574	4.13605	-0.165456	0.986697	-1.15215	DNAJA3	-	-
chr2:235861783-235861912:mpeak_52084|chr2_235860627_235962235_SH3BP4_NM_+|	75.2685	-1.43376	0.494603	-2.89882	0.00374574	0.0310078	6.80938	8.46902	9.39254	10.2834	8.57124	10.0181	217.9	194.787	184.435	84.324	91.4266	76.8053	4.13163	-0.226896	1.24143	-1.46832	SH3BP4	chr2:235861834:+	chr2_234953203_+;chr2_234953268_+
chr12:69776993-69777238:mpeak_20406|chr12_69753489_69783926_YEATS4_NM_+|	47.3434	-2.58107	1.15455	-2.23556	0.0253804	0.10683	0	3.17588	0	3.08503	2.85708	18.923	76.6055	78.3384	75.9942	99.7491	104.76	104.633	4.12563	-2.9689	-0.420764	-2.54813	YEATS4	-	-
chr10:93718951-93719034:mpeak_11743|chr10_93683735_93788546_BTAF1_NM_+|	15.1458	-5.3121	1.50085	-3.5394	0.000401044	0.00760005	1.70234	0	0	3.08503	3.80944	8.3484	32.3446	75.1625	17.0773	13.3684	12.3807	14.4706	4.09926	-3.16254	1.63115	-4.79369	BTAF1	-	-
chr1:151495907-151496005:mpeak_5590|chr1_151483861_151509680_CGN_NM_+|	82.7445	-1.25619	0.546458	-2.29879	0.021517	0.0959187	10.2141	9.52765	5.97707	8.22673	14.2854	7.23528	180.449	206.432	242.498	84.324	115.236	108.529	4.08637	-0.209942	1.03058	-1.24053	CGN	-	-
chr2:223795345-223795535:mpeak_51737|chr2_223725731_223806214_ACSL3_NM_+|	324.437	-1.24549	0.574379	-2.16841	0.0301271	0.120737	32.3446	20.1139	14.5157	84.324	25.7137	76.2488	534.536	627.766	479.02	602.608	714.27	681.786	4.0805	-1.47585	-0.284178	-1.19167	ACSL3	chr2:223795417:+	-
chr3:37370468-37370592:mpeak_58441|chr3_37284681_37407570_GOLGA4_NM_+|	30.0385	-2.36744	1.1165	-2.12042	0.0339707	0.130323	1.70234	0	1.70773	13.3684	12.3807	2.7828	32.3446	56.1072	38.424	46.2754	81.903	73.466	4.03159	-3.0647	-0.668395	-2.3963	GOLGA4	-	chr3_37329069_+
chrX:57358276-57358358:mpeak_89330|chrX_57313109_57515189_FAAH2_NM_+|	9.86744	-4.93104	1.51051	-3.2645	0.00109658	0.0141285	0	1.05863	0	0	5.71416	6.12216	34.0469	22.2312	23.0544	6.17005	13.333	6.67872	4.00326	-3.48295	1.59935	-5.0823	FAAH2	chrX:57358327:+;chrX:57358356:+	chrX_57331893_+
chr21:44400666-44400721:mpeak_55551|chr21_44394619_44449999_PKNOX1_NM_+|	36.4294	-3.42992	1.06526	-3.21979	0.00128286	0.015646	0	3.17588	0	15.4251	3.80944	6.67872	62.9868	70.928	105.026	50.3887	71.427	47.3076	3.98746	-3.02846	0.498575	-3.52704	PKNOX1	-	chr21_42980609_+
chr8:126089049-126089172:mpeak_83945|chr8_126036915_126104061_KIAA0196_NM_-|	39.0403	-2.48273	1.08984	-2.27806	0.0227232	0.0996527	0	0	3.41547	6.17005	1.90472	8.90496	112.355	105.863	39.2779	49.3604	73.3317	67.9004	3.97926	-2.31366	0.434055	-2.74771	KIAA0196	-	-
chr18:55712646-55712732:mpeak_41237|chr18_55711609_56063398_NEDD4L_NM_+|	40.3572	-1.96009	0.792037	-2.47474	0.0133332	0.0713241	1.70234	0	5.1232	9.25508	7.61888	6.12216	68.0938	91.042	98.1948	55.5305	87.6171	53.9863	3.97867	-1.75237	0.384446	-2.13682	NEDD4L	chr18:55712703:+;chr18:55712732:+	chr18_58045482_+
chr11:33767890-33767997:mpeak_14275|chr11_33763630_33796071_FBXO3_NM_-|	39.5049	-2.49506	1.07141	-2.32876	0.0198719	0.0914798	0	0	3.41547	12.3401	1.90472	4.45248	98.736	104.804	54.6475	78.154	43.8086	71.7963	3.96859	-2.45267	0.414158	-2.86683	FBXO3	-	-
chr19:15303753-15303813:mpeak_42728|chr19_15272525_15311792_NOTCH3_NM_-|	82.2336	-2.90975	0.61683	-4.71726	2.39042e-06	0.000284561	5.10703	12.7035	11.1003	9.25508	25.7137	18.3665	219.602	178.908	333.008	47.3037	69.5223	56.2126	3.95217	-0.88348	2.0798	-2.96328	NOTCH3	chr19:15303758:-	-
chr20:5930911-5930981:mpeak_52637|chr20_5919372_5931204_TRMT6_NM_-|	40.8534	-2.03005	0.861836	-2.35549	0.0184981	0.0873928	3.40469	0	2.5616	13.3684	7.61888	3.89592	86.8196	70.928	69.1633	76.0973	92.3789	64.0044	3.94403	-2.06027	-0.0349849	-2.02528	TRMT6	chr20:5930924:-	chr20_5950281_-
chr1:36224996-36225233:mpeak_1799|chr1_36202207_36235551_CLSPN_NM_-|	29.9821	-2.05794	0.87059	-2.36385	0.0180863	0.0863123	3.40469	2.11725	0.853867	9.25508	6.66652	8.3484	62.9868	56.1072	42.6934	77.1256	52.3798	37.8461	3.94086	-1.92849	-0.0487827	-1.87971	CLSPN	chr1:36224947:-;chr1:36224998:-;chr1:36225175:-;chr1:36225227:-	chr1_35759395_-;chr1_35759576_-;chr1_35759628_-
chr20:21317565-21317772:mpeak_52959|chr20_21283941_21369910_XRN2_NM_+|	35.785	-2.83113	1.39307	-2.03229	0.042124	0.151374	0	0	4.26934	0	0	8.90496	158.318	67.7522	99.0486	34.9636	26.6661	29.4977	3.93949	-1.0606	1.83501	-2.89561	XRN2	-	chr20_21337043_+
chr3:184533965-184534022:mpeak_62503|chr3_184529930_184769663_VPS8_NM_+|	35.9951	-2.37319	1.03794	-2.28645	0.022228	0.0983104	1.70234	2.11725	0	10.2834	13.333	7.23528	34.0469	77.2798	34.1547	84.324	76.1888	91.2759	3.93824	-3.01386	-0.791379	-2.22248	VPS8	chr3:184534019:+	chr3_184816230_+
chr13:37575333-37575383:mpeak_23461|chr13_37574677_37583320_EXOSC8_NM_+|	59.6426	-2.4788	0.965336	-2.56781	0.0102342	0.0604844	5.10703	0	0	7.19839	1.90472	5.5656	120.866	138.68	129.788	96.6641	111.426	98.5112	3.9352	-1.52218	0.344646	-1.86683	EXOSC8	-	-
chr16:56974152-56974213:mpeak_33576|chr16_56966001_56977037_HERPUD1_NM_+|	96.4282	-1.32654	0.593515	-2.23506	0.0254136	0.106863	13.6188	4.23451	7.68481	7.19839	21.9043	11.6878	248.542	200.081	202.367	125.458	181.901	132.461	3.92296	-0.675581	0.565722	-1.2413	HERPUD1	chr16:56974209:+	chr16_56940295_+
chr13:20222468-20222656:mpeak_22812|chr13_20207787_20245973_MPHOSPH8_NM_+|	74.9807	-1.72703	0.603281	-2.86273	0.00420003	0.0334577	3.40469	3.17588	6.83094	22.6235	24.7614	18.923	98.736	154.56	88.8022	147.053	182.853	148.045	3.92037	-2.30571	-0.482454	-1.82326	MPHOSPH8	chr13:20222527:+	chr13_19648386_+;chr13_19648472_+;chr13_19648507_+
chr12:124886941-124887091:mpeak_22527|chr12_124810129_125052010_NCOR2_NM_-|	853.78	-0.82471	0.305253	-2.70172	0.00689809	0.0462085	81.7126	92.1006	98.1948	80.2107	53.3322	64.0044	2357.75	2280.28	2313.98	1013.94	1045.69	764.157	3.91265	0.461451	1.2998	-0.838345	NCOR2	-	chr12_124402481_-
chr12:53432133-53432197:mpeak_19420|chr12_53400041_53433926_EIF4B_NM_+|	576.601	-0.947476	0.256623	-3.69209	0.000222415	0.00537101	51.0703	44.4623	50.3782	78.154	65.7129	68.4569	1261.44	1302.11	1176.63	952.244	984.74	883.818	3.90117	-0.541178	0.407001	-0.94818	EIF4B	-	-
chr15:59561401-59561465:mpeak_29717|chr15_59429655_59665071_MYO1E_NM_-|	37.7651	-1.54314	0.760697	-2.02859	0.0425	0.152466	5.10703	3.17588	3.41547	4.11337	0.95236	7.79184	114.057	86.8074	99.0486	33.9353	41.9038	52.8732	3.90059	-0.136309	1.22039	-1.3567	MYO1E	chr15:59561412:-	-
chr6:125616804-125616865:mpeak_75294|chr6_125597389_125623282_HDDC2_NM_-|	77.1586	-1.52989	0.767829	-1.99249	0.0463171	0.161402	0	7.41039	3.41547	4.11337	10.476	21.7059	134.485	137.622	144.304	128.543	145.711	188.117	3.89971	-1.7453	-0.151045	-1.59425	HDDC2	-	-
chr8:109462667-109462729:mpeak_83523|chr8_109455852_109498740_EMC2_NM_+|	103.132	-2.07147	0.981913	-2.10963	0.0348905	0.132358	5.10703	0	0	10.2834	11.4283	8.3484	93.629	186.318	113.564	226.235	290.47	292.194	3.89343	-2.55729	-1.03955	-1.51774	EMC2	-	-
chr8:63936507-63936692:mpeak_82257|chr8_63928012_63951610_GGH_NM_-|	110.191	-1.78495	0.660689	-2.70165	0.00689956	0.0462085	17.0234	10.5863	0.853867	24.6802	13.333	22.2624	243.435	208.55	279.215	137.798	171.425	193.126	3.89273	-1.08246	0.541575	-1.62403	GGH	-	-
chr14:92477335-92477422:mpeak_27590|chr14_92436237_92506403_TRIP11_NM_-|	26.1311	-3.36802	1.32953	-2.53324	0.0113014	0.0646714	1.70234	0	0	3.08503	5.71416	6.67872	47.6657	51.8727	32.447	41.1337	67.6176	55.656	3.86939	-3.18462	-0.316896	-2.86772	TRIP11	-	-
chr2:225379254-225379431:mpeak_51788|chr2_225339093_225450114_CUL3_NM_-|	91.5146	-2.06648	0.684561	-3.01869	0.00253872	0.0242455	6.80938	5.29314	0	18.5102	10.476	22.2624	148.104	181.025	140.034	158.365	231.424	175.873	3.86939	-2.0822	-0.269847	-1.81236	CUL3	-	-
chr6:144814540-144814601:mpeak_75751|chr6_144612872_145172124_UTRN_NM_+|	17.7832	-3.03396	1.19137	-2.54661	0.0108774	0.0629697	0	2.11725	0.853867	11.3118	5.71416	1.66968	34.0469	57.1659	24.7622	22.6235	31.4279	21.7059	3.8428	-2.65362	0.614357	-3.26798	UTRN	-	-
chr4:57266118-57266241:mpeak_64444|chr4_57261714_57301802_PPAT_NM_-|	62.9206	-1.71053	0.798561	-2.14201	0.0321928	0.12641	0	0	4.26934	6.17005	7.61888	7.23528	91.9266	131.27	110.149	126.486	135.235	134.688	3.84227	-2.29997	-0.249971	-2.05	PPAT	chr4:57266117:-;chr4:57266182:-	chr4_56399952_-;chr4_56400018_-
chr10:118711410-118711481:mpeak_12795|chr10_118646077_118886097_SHTN1_NM_-|	64.4609	-2.83024	0.901635	-3.13901	0.00169522	0.018705	6.80938	0	0.853867	13.3684	11.4283	30.6108	71.4985	130.211	98.1948	111.061	138.092	161.402	3.83284	-2.85406	-0.453075	-2.40098	SHTN1	chr10:118711417:-	-
chr2:101630334-101630384:mpeak_48604|chr2_101624735_101767846_TBC1D8_NM_-|	22.4733	-4.10624	1.20462	-3.40876	0.000652593	0.0102143	0	2.11725	0.853867	30.8503	4.7618	13.3574	20.4281	37.052	58.9169	41.1337	32.3802	27.828	3.82887	-4.0428	0.199822	-4.24263	TBC1D8	-	-
chr3:193854202-193854282:mpeak_62710|chr3_193853930_193855471_HES1_NM_+|	131.156	-1.25095	0.5387	-2.32216	0.0202244	0.0927941	5.10703	11.6449	19.639	21.5952	21.9043	10.0181	357.492	284.771	311.662	190.243	189.52	150.271	3.81486	-0.556435	0.84779	-1.40422	HES1	-	chr3_194136484_+
chr8:131164976-131165031:mpeak_84069|chr8_131067051_131455906_ASAP1_NM_-|	66.4946	-2.06758	0.889073	-2.32555	0.0200426	0.0921152	3.40469	3.17588	0	15.4251	25.7137	5.5656	93.629	85.7488	79.4097	159.393	169.52	156.95	3.81427	-2.82728	-0.908782	-1.91849	ASAP1	-	-
chr19:19392806-19392856:mpeak_43030|chr19_19387483_19431321_SUGP1_NM_-|	38.3531	-3.09329	1.13824	-2.71761	0.00657553	0.0446396	3.40469	0	0	4.11337	2.85708	5.00904	103.843	89.9833	76.8481	62.7288	55.2369	56.2126	3.77356	-1.81497	0.635994	-2.45096	SUGP1	-	-
chr12:112120943-112121002:mpeak_21642|chr12_112082366_112123800_BRAP_NM_-|	33.2919	-2.21084	1.0536	-2.09836	0.0358735	0.135358	1.70234	0	1.70773	3.08503	6.66652	15.0271	34.0469	48.6969	52.9398	74.0406	71.427	90.1628	3.76989	-2.86122	-0.79628	-2.06494	BRAP	-	-
chr6:151763322-151763381:mpeak_75963|chr6_151726402_151773316_RMND1_NM_-|	53.1209	-2.84161	0.800872	-3.54815	0.000387954	0.00741853	3.40469	3.17588	0	10.2834	17.1425	21.1493	93.629	101.628	66.6017	100.777	99.9978	119.66	3.76953	-2.88393	-0.291246	-2.59269	RMND1	chr6:151763322:-	chr6_151442191_-
chr3:107937366-107937420:mpeak_60140|chr3_107881502_107941417_IFT57_NM_-|	46.822	-1.61786	0.820977	-1.97066	0.0487633	0.167403	1.70234	5.29314	2.5616	12.3401	8.57124	11.1312	88.5219	125.977	39.2779	73.0123	113.331	80.1447	3.76595	-1.74535	-0.0705111	-1.67484	IFT57	-	-
chr1:235377079-235377234:mpeak_8817|chr1_235331967_235491532_ARID4B_NM_-|	32.4898	-3.81463	1.02507	-3.72135	0.000198158	0.00509213	1.70234	2.11725	0	26.7369	9.5236	20.0362	73.2008	38.1106	40.9856	53.4738	66.6652	57.3257	3.76199	-3.88156	-0.220644	-3.66091	ARID4B	chr1:235377125:-	chr1_235213812_-;chr1_235213866_-
chr5:131951679-131951817:mpeak_69931|chr5_131892615_131977869_RAD50_NM_+|	35.0201	-4.28479	0.892743	-4.79958	1.58996e-06	0.00022665	1.70234	2.11725	0.853867	35.992	39.9991	43.9683	34.0469	60.3418	29.8854	42.162	59.0463	70.1266	3.76061	-4.68191	-0.463295	-4.21861	RAD50	-	-
chr12:39735829-39735937:mpeak_18679|chr12_39688319_39837192_KIF21A_NM_-|	47.7686	-4.04257	0.853881	-4.73434	2.19766e-06	0.000271183	1.70234	7.41039	0	25.7085	14.2854	18.3665	161.723	133.387	69.1633	33.9353	61.9034	45.6379	3.75243	-2.67903	1.36446	-4.04349	KIF21A	chr12:39735835:-	-
chr4:69188116-69188591:mpeak_64560|chr4_69180041_69215824_YTHDC1_NM_-|	106.912	-1.82252	0.74317	-2.45237	0.014192	0.0742697	0	0	5.97707	15.4251	9.5236	16.6968	180.449	185.26	112.71	246.802	275.232	234.868	3.74802	-2.80065	-0.661833	-2.13882	YTHDC1	-	chr4_68322399_-
chr12:4430422-4430478:mpeak_17663|chr12_4430358_4461425_TIGAR_NM_+|	67.2437	-3.1724	1.08741	-2.91741	0.00352957	0.0299103	5.10703	0	0	19.5385	1.90472	7.23528	122.569	149.266	140.034	111.061	133.33	116.878	3.71989	-2.48941	0.189114	-2.67853	TIGAR	-	-
chr11:20389147-20389212:mpeak_14074|chr11_20385230_20404525_HTATIP2_NM_+|	116.473	-1.23201	0.495774	-2.48502	0.0129544	0.0702761	10.2141	11.6449	6.83094	11.3118	15.2378	18.923	263.863	286.888	223.713	149.11	212.376	187.561	3.70448	-0.664453	0.496271	-1.16072	HTATIP2	chr11:20389158:+;chr11:20389201:+	chr11_20367617_+;chr11_20367652_+
chr15:90153502-90153561:mpeak_30914|chr15_90118817_90170186_TICRR_NM_+|	31.9518	-4.12064	1.22744	-3.35709	0.000787667	0.011578	3.40469	0	0	3.08503	1.90472	7.23528	122.569	91.042	62.3323	29.8219	38.0944	23.9321	3.70151	-1.84424	1.58704	-3.43129	TICRR	-	chr15_89610330_+
chr2:47389656-47389805:mpeak_47019|chr2_47387943_47404075_CALM2_NM_-|	863.543	-1.98306	0.797368	-2.48701	0.0128821	0.0700639	139.592	21.1725	49.5243	306.446	86.6648	169.194	2264.12	1610.17	1816.18	1104.44	1447.59	1347.43	3.69546	-1.41898	0.545273	-1.96425	CALM2	chr2:47389660:-;chr2:47389717:-	-
chr3:25675342-25675517:mpeak_58159|chr3_25639968_25705863_TOP2B_NM_-|	229.522	-1.39169	0.48661	-2.85998	0.00423672	0.0336233	8.51172	20.1139	18.7851	42.162	37.142	50.0904	439.205	534.607	315.077	323.928	454.276	510.366	3.67842	-1.44849	0.000357849	-1.44885	TOP2B	-	chr3_25633845_-
chr12:39750631-39750706:mpeak_18680|chr12_39688319_39837192_KIF21A_NM_-|	44.6676	-2.91625	0.901146	-3.23615	0.00121153	0.0150144	6.80938	2.11725	0	7.19839	8.57124	5.5656	161.723	133.387	69.1633	33.9353	61.9034	45.6379	3.6758	-1.25705	1.36446	-2.62151	KIF21A	-	-
chr4:69199020-69199192:mpeak_64562|chr4_69180041_69215824_YTHDC1_NM_-|	107.916	-1.68264	0.812171	-2.07178	0.0382863	0.142053	8.51172	3.17588	0	20.5668	5.71416	21.7059	180.449	185.26	112.71	246.802	275.232	234.868	3.66445	-2.03766	-0.661833	-1.37583	YTHDC1	-	-
chr16:31133591-31133648:mpeak_33210|chr16_31128984_31142066_KAT8_NM_+|	27.5344	-3.59426	0.952127	-3.77497	0.000160024	0.00437709	1.70234	0	2.5616	6.17005	19.9996	9.46152	49.368	69.8694	55.5014	28.7936	41.9038	45.0814	3.66028	-3.06288	0.593829	-3.65671	KAT8	chr16:31133648:+	chr16_31122327_+;chr16_31122377_+
chr1:22074619-22074672:mpeak_992|chr1_22005932_22109688_USP48_NM_-|	33.3422	-2.94028	1.35951	-2.16275	0.0305604	0.122011	1.70234	0	0	6.17005	2.85708	7.23528	57.8797	57.1659	24.7622	66.8422	78.0935	97.398	3.6529	-3.25595	-0.793551	-2.4624	USP48	-	-
chr3:81584192-81584338:mpeak_59781|chr3_81539614_81810950_GBE1_NM_-|	103.422	-1.43951	0.606921	-2.37182	0.0177005	0.0853889	6.80938	16.938	7.68481	9.25508	14.2854	8.90496	318.338	207.491	335.57	74.0406	107.617	134.131	3.64897	-0.0457715	1.44772	-1.4935	GBE1	-	chr3_81535024_-;chr3_81535107_-
chr4:100001127-100001223:mpeak_65249|chr4_99993592_100009939_ADH5_NM_-|	145.11	-1.37128	0.5501	-2.49279	0.0126745	0.0695166	10.2141	17.9967	11.1003	9.25508	18.0948	25.0452	301.315	386.399	392.779	146.025	246.661	176.43	3.63825	-0.414499	0.924897	-1.3394	ADH5	chr4:100001137:-;chr4:100001170:-;chr4:100001218:-	chr4_99080065_-
chr2:183888603-183888653:mpeak_50604|chr2_183790546_183903586_NCKAP1_NM_-|	75.303	-3.06111	0.745483	-4.10621	4.02204e-05	0.00188857	8.51172	0	1.70773	17.4818	14.2854	31.7239	132.783	125.977	163.089	136.769	117.14	154.167	3.63382	-2.63524	0.0478829	-2.68312	NCKAP1	-	chr2_183023875_-
chr13:28227421-28227558:mpeak_23199|chr13_28194879_28239822_POLR1D_NM_+|	115.895	-1.50025	0.73816	-2.03242	0.0421107	0.151374	1.70234	4.23451	12.808	28.7936	19.9996	37.2895	146.402	103.745	266.407	185.102	287.613	296.647	3.62883	-2.19923	-0.574742	-1.62449	POLR1D	-	-
chr15:91523569-91523630:mpeak_31033|chr15_91510432_91537881_PRC1_NM_-|	285.244	-0.949734	0.38534	-2.46466	0.0137142	0.0727182	22.1305	24.3484	33.3008	29.8219	25.7137	21.1493	716.687	632.001	862.406	308.503	369.516	377.348	3.60816	0.0570795	1.06702	-1.00994	PRC1	-	-
chr20:34131585-34131674:mpeak_53295|chr20_34129777_34145195_ERGIC3_NM_+|	221.242	-1.89963	0.523285	-3.63019	0.000283209	0.00615842	23.8328	26.4657	4.26934	41.1337	39.9991	41.742	505.596	473.206	537.083	330.098	291.422	340.058	3.59973	-1.17107	0.656685	-1.82775	ERGIC3	chr20:34131673:+	chr20_35543866_+;chr20_35543909_+
chr3:128363767-128363836:mpeak_60761|chr3_128339436_128369719_RPN1_NM_-|	519.86	-0.910428	0.391356	-2.32634	0.0200003	0.0920208	45.9633	63.5176	36.7163	50.3887	28.5708	48.4207	1404.43	1158.14	1502.81	638.6	569.511	691.248	3.59615	0.198774	1.09788	-0.899103	RPN1	-	-
chr11:66580075-66580138:mpeak_15538|chr11_66512206_66610639_C11orf80_NM_+|	13.3887	-4.23657	1.44483	-2.93223	0.00336537	0.0290246	0	0	0.853867	8.22673	6.66652	6.67872	13.6188	24.3484	33.3008	12.3401	39.0468	15.5837	3.59432	-4.659	0.0897279	-4.74873	C11orf80	-	-
chr14:50266186-50266253:mpeak_25771|chr14_50251431_50319791_NEMF_NM_-|	33.012	-3.15608	1.29799	-2.43151	0.0150361	0.0770681	1.70234	1.05863	0	11.3118	19.9996	10.5746	47.6657	59.2831	9.39254	70.9556	79.0459	85.1537	3.55975	-3.92322	-1.01525	-2.90797	NEMF	-	chr14_49799474_-
chr17:1724439-1724505:mpeak_35312|chr17_1684733_1733175_SMYD4_NM_-|	88.5051	-1.25999	0.609281	-2.06799	0.0386405	0.142885	5.10703	10.5863	4.26934	7.19839	17.1425	12.8009	200.877	131.27	232.252	166.591	140.949	133.018	3.53698	-0.895739	0.35738	-1.25312	SMYD4	chr17:1724451:-	chr17_1821161_-
chr7:44529506-44529566:mpeak_77805|chr7_44425720_44530385_NUDCD3_NM_-|	159.472	-1.92292	0.421058	-4.56687	4.95054e-06	0.000465099	11.9164	13.7622	7.68481	40.1053	33.3326	34.5067	285.994	284.771	373.994	267.369	298.089	262.14	3.53142	-1.69395	0.191017	-1.88497	NUDCD3	chr7:44529512:-	chr7_44489915_-
chr10:14891519-14891675:mpeak_9632|chr10_14880158_14913526_HSPA14_NM_+|	70.5475	-2.17429	0.768884	-2.82786	0.00468604	0.0361373	0	3.17588	7.68481	7.19839	8.57124	22.819	120.866	200.081	144.304	111.061	122.854	97.9546	3.50156	-1.82906	0.48739	-2.31645	HSPA14	chr10:14891668:+	chr10_14849668_+
chr18:55233766-55233821:mpeak_41203|chr18_55218078_55253969_FECH_NM_-|	124.614	-1.27665	0.490462	-2.60296	0.00924226	0.0564185	17.0234	6.35176	6.83094	13.3684	10.476	17.8099	268.97	284.771	309.1	178.931	211.424	170.307	3.50078	-0.463624	0.621962	-1.08559	FECH	-	-
chr5:52397919-52398050:mpeak_67920|chr5_52394497_52405602_MOCS2_NM_-|	56.7021	-2.06226	0.755464	-2.72979	0.00633747	0.0436903	3.40469	4.23451	0	14.3968	6.66652	7.23528	120.866	106.921	99.9025	105.919	119.045	91.8324	3.49684	-1.88924	0.048776	-1.93801	MOCS2	-	chr5_53102172_-
chr10:24474511-24474561:mpeak_9890|chr10_23983674_24834755_KIAA1217_NM_+|	21.97	-2.6104	1.22495	-2.13103	0.0330864	0.128514	1.70234	0	1.70773	9.25508	0.95236	3.89592	39.1539	25.4071	81.9713	24.6802	34.285	40.6289	3.49078	-2.04816	0.557087	-2.60525	KIAA1217	-	-
chr7:148718119-148718248:mpeak_80499|chr7_148701301_148725782_PDIA4_NM_-|	794.108	-0.883755	0.416314	-2.12281	0.03377	0.130034	69.7961	52.9314	106.733	48.3321	53.3322	60.6651	2393.5	1775.32	2442.91	713.669	1025.69	786.42	3.47051	0.499325	1.3883	-0.888973	PDIA4	chr7:148718194:-	chr7_149021082_-;chr7_149021144_-
chr5:463357-463461:mpeak_67025|chr5_443333_466841_EXOC3_NM_+|	139.279	-1.34395	0.602641	-2.23009	0.0257412	0.107735	11.9164	6.35176	15.3696	16.4535	7.61888	28.3846	331.957	265.715	373.994	208.753	229.519	175.316	3.46187	-0.64105	0.66319	-1.30424	EXOC3	-	chr5_463346_+
chr15:59185373-59185553:mpeak_29682|chr15_59172306_59225852_SLTM_NM_-|	67.8948	-3.32457	0.773545	-4.29783	1.72476e-05	0.00101234	1.70234	5.29314	0	32.9069	37.142	22.819	97.0337	125.977	80.2635	99.7491	163.806	148.045	3.45998	-3.73069	-0.440622	-3.29006	SLTM	-	chr15_58893301_-;chr15_58893342_-
chr5:145850231-145850320:mpeak_70737|chr5_145826872_145890003_TCERG1_NM_+|	37.9884	-1.9248	0.890887	-2.16054	0.0307307	0.122517	1.70234	4.23451	0	4.11337	3.80944	6.12216	59.5821	101.628	96.487	75.0689	48.5704	54.5429	3.45571	-1.24228	0.532324	-1.77461	TCERG1	-	chr5_146470718_+
chr4:107241761-107241891:mpeak_65532|chr4_107236766_107268682_AIMP1_NM_+|	67.3741	-2.49866	1.11731	-2.23632	0.0253307	0.106717	3.40469	0	0	8.22673	7.61888	5.5656	88.5219	123.859	85.3867	133.684	175.234	176.986	3.43021	-2.65277	-0.706485	-1.94629	AIMP1	-	-
chr10:70952973-70953160:mpeak_10991|chr10_70939959_70968355_SUPV3L1_NM_+|	13.7481	-4.17354	1.31653	-3.1701	0.00152385	0.0173814	1.70234	0	0.853867	3.08503	1.90472	7.79184	57.8797	21.1725	33.3008	12.3401	10.476	14.4706	3.41274	-2.32199	1.59131	-3.9133	SUPV3L1	chr10:70953023:+;chr10:70953161:+	chr10_69193238_+;chr10_69193271_+;chr10_69193404_+
chr10:94675731-94675797:mpeak_11809|chr10_94594469_94817979_EXOC6_NM_+|	28.3624	-3.20993	1.03411	-3.10406	0.00190886	0.0202418	1.70234	2.11725	0	6.17005	3.80944	15.0271	64.6891	55.0486	48.6704	44.2187	50.4751	48.4207	3.40209	-2.71082	0.234792	-2.94561	EXOC6	chr10:94675785:+	chr10_92916030_+
chr13:42667160-42667210:mpeak_23630|chr13_42614171_42803234_DGKH_NM_+|	66.1404	-2.79195	1.18227	-2.36151	0.0182005	0.0866166	3.40469	0	0	6.17005	4.7618	12.2443	85.1172	150.325	66.6017	166.591	134.283	164.185	3.38165	-2.76705	-0.622656	-2.14439	DGKH	-	-
chr16:89452527-89452745:mpeak_35013|chr16_89353521_89556969_ANKRD11_NR_-mpeak_35013|chr16_89335071_89556969_ANKRD11_NM_-||	48.9248	-1.74228	0.818346	-2.12903	0.0332518	0.12886	3.40469	0	2.5616	4.11337	6.66652	8.90496	71.4985	101.628	92.2177	83.2957	107.617	105.19	3.37276	-1.72218	-0.158229	-1.56395	ANKRD11	-	chr16_89386160_-
chr9:95301761-95301812:mpeak_86101|chr9_95087749_95375300_CENPP_NM_+|	30.4547	-2.15903	0.938817	-2.29973	0.0214636	0.0957815	1.70234	2.11725	1.70773	10.2834	12.3807	3.89592	44.261	35.9933	83.679	59.6438	48.5704	61.2216	3.3717	-2.2646	-0.0476299	-2.21697	CENPP	-	-
chr1:893571-893701:mpeak_38|chr1_880180_894679_NOC2L_NM_-|	147.763	-1.83537	0.510314	-3.59656	0.000322456	0.0067796	23.8328	11.6449	7.68481	17.4818	17.1425	10.5746	437.503	349.347	498.659	142.939	126.664	129.679	3.35762	-0.0665092	1.68686	-1.75337	NOC2L	-	chr1_958241_-
chr1:39888078-39888214:mpeak_2003|chr1_39549838_39951209_MACF1_NM_+|	47.954	-2.89616	0.98967	-2.92639	0.00342924	0.0293657	5.10703	1.05863	0	12.3401	6.66652	13.3574	52.7727	138.68	85.3867	64.7855	76.1888	119.104	3.34074	-2.39207	0.0901047	-2.48217	MACF1	-	chr1_39422458_+
chrX:2838276-2838480:mpeak_88322|chrX_2825673_2847416_ARSD_NM_-|	201.521	-1.03451	0.458298	-2.25729	0.02399	0.103311	15.3211	16.938	6.83094	17.4818	24.7614	29.4977	376.218	350.406	453.404	331.126	399.991	396.271	3.31264	-0.875993	0.065836	-0.941829	ARSD	chrX:2838272:-;chrX:2838337:-;chrX:2838364:-	chrX_2920233_-;chrX_2920325_-
chr11:9311364-9311510:mpeak_13686|chr11_9302588_9336315_TMEM41B_NR_-mpeak_13686|chr11_9305140_9336315_TMEM41B_NM_-||	28.578	-3.54171	1.20169	-2.94727	0.00320598	0.0282532	0	2.11725	0	7.19839	0.95236	8.90496	62.9868	62.459	66.6017	40.1053	34.285	57.3257	3.30739	-3.00999	0.544032	-3.55402	TMEM41B	-	-
chrX:24187659-24187786:mpeak_88690|chrX_24167761_24228309_ZFX_NM_+|	54.5498	-2.07251	0.879791	-2.35568	0.0184886	0.0873928	3.40469	0	1.70773	7.19839	12.3807	11.1312	59.5821	98.4523	74.2865	105.919	158.092	122.443	3.30088	-2.58664	-0.734179	-1.85246	ZFX	-	chrX_24169659_+
chr17:17437217-17437275:mpeak_36230|chr17_17409162_17495017_PEMT_NM_-|	42.3842	-3.17602	0.942893	-3.36838	0.000756115	0.0113511	5.10703	1.05863	0.853867	32.9069	8.57124	15.5837	39.1539	93.1592	81.1174	70.9556	79.9983	80.1447	3.28891	-3.02308	-0.114741	-2.90834	PEMT	-	-
chr12:121789207-121789333:mpeak_22166|chr12_121746494_121792012_ANAPC5_NM_-|	319.81	-1.59413	0.474609	-3.35882	0.000782757	0.011546	25.5352	22.2312	17.0773	37.0203	76.1888	45.6379	493.68	674.346	810.32	466.867	586.654	582.162	3.27767	-1.2926	0.274401	-1.567	ANAPC5	chr12:121789267:-	-
chr5:122685628-122685789:mpeak_69677|chr5_122682447_122759286_CEP120_NM_-|	50.2834	-3.24466	1.31777	-2.46223	0.0138074	0.0729833	0	2.11725	0	25.7085	9.5236	5.5656	28.9399	107.98	57.2091	92.5508	141.902	131.905	3.27193	-4.26822	-0.916236	-3.35199	CEP120	-	-
chr1:171519266-171519389:mpeak_6654|chr1_171454665_171560725_PRRC2C_NM_+|	202.474	-2.09076	0.626979	-3.33466	0.000854046	0.0122139	23.8328	19.0553	7.68481	47.3037	28.5708	22.819	517.513	732.57	299.707	230.349	254.28	246	3.26321	-0.96459	1.08486	-2.04945	PRRC2C	-	-
chr7:5396542-5396718:mpeak_76819|chr7_5347943_5463177_TNRC18_NM_-mpeak_76819|chr7_5347943_5463177_TNRC18_NM_-||	118.103	-2.01476	0.691123	-2.9152	0.00355462	0.0300136	17.0234	14.8208	5.97707	14.3968	4.7618	6.12216	551.56	275.243	333.008	64.7855	79.9983	49.5339	3.26099	0.58116	2.5774	-1.99624	TNRC18	-	-
chr12:112696292-112696358:mpeak_21708|chr12_112600327_112819896_HECTD4_NM_-|	40.7018	-2.88536	0.955542	-3.0196	0.00253106	0.0242271	6.80938	0	0.853867	2.05668	6.66652	5.00904	136.188	125.977	90.5099	40.1053	51.4274	22.819	3.25935	-0.84154	1.62486	-2.4664	HECTD4	-	-
chr12:133308015-133308073:mpeak_22722|chr12_133304029_133338474_ANKLE2_NM_-|	125.538	-2.4078	0.552344	-4.35924	1.30515e-05	0.000817123	10.2141	0	8.53867	21.5952	14.2854	24.4887	285.994	259.364	321.054	165.563	193.329	202.031	3.24662	-1.68671	0.627249	-2.31396	ANKLE2	-	-
chr17:7412844-7413015:mpeak_35789|chr17_7387697_7416339_POLR2A_NM_+|	1022.24	-0.981207	0.388195	-2.52761	0.0114842	0.0653191	110.652	133.387	78.5558	51.4171	29.5232	38.4027	3389.37	3848.11	2721.28	588.211	691.413	586.615	3.23931	1.43461	2.41583	-0.981219	POLR2A	-	-
chr19:4694328-4694399:mpeak_41907|chr19_4676668_4723855_DPP9_NM_-|	124.646	-1.45538	0.525121	-2.77152	0.00557957	0.0402006	8.51172	7.41039	14.5157	8.22673	19.9996	15.5837	357.492	251.953	330.447	187.158	158.092	136.357	3.23844	-0.525393	0.964639	-1.49003	DPP9	chr19:4694341:-	chr19_4694336_-
chr4:54319116-54319304:mpeak_64365|chr4_54243819_54325468_FIP1L1_NM_+|	103.798	-3.1906	0.809763	-3.94017	8.14241e-05	0.00294101	8.51172	0	0	9.25508	12.3807	7.23528	268.97	299.592	221.152	117.231	134.283	166.968	3.23347	-1.7621	0.916165	-2.67826	FIP1L1	-	chr4_53453020_+;chr4_53453133_+
chr7:129257962-129258099:mpeak_79953|chr7_129251542_129394857_NRF1_NM_+mpeak_79953|chr7_129251542_129394857_NRF1_NM_+||	30.8685	-3.07103	1.25184	-2.45321	0.0141586	0.0742697	0	2.11725	0	3.08503	0.95236	9.46152	56.1774	58.2245	82.8251	40.1053	65.7129	51.7601	3.22053	-2.67258	0.323789	-2.99636	NRF1	-	-
chr5:65473305-65473497:mpeak_68236|chr5_65440045_65474546_SREK1_NM_+|	79.9379	-2.27107	0.999705	-2.27174	0.0231022	0.100962	3.40469	0	0.853867	27.7652	20.9519	10.0181	47.6657	79.3971	71.7249	183.045	256.185	258.244	3.2134	-3.78579	-1.81091	-1.97488	SREK1	-	chr5_66177597_+;chr5_66177615_+
chr16:88728502-88728570:mpeak_34891|chr16_88719013_88729557_MVD_NM_-|	253.152	-1.65984	0.462441	-3.5893	0.000331569	0.00688123	23.8328	7.41039	23.0544	38.0486	48.5704	31.7239	556.667	544.134	589.169	375.345	474.275	325.588	3.21294	-1.12401	0.524081	-1.64809	MVD	chr16:88728507:-	chr16_88662083_-
chr2:219134199-219134276:mpeak_51531|chr2_219129331_219134932_AAMP_NM_-|	1242.12	-0.773617	0.319523	-2.42116	0.0154709	0.0783687	91.9266	91.042	122.957	96.6641	95.236	74.5791	3043.79	2676.21	3821.91	1579.53	1492.35	1719.21	3.20612	0.199157	0.993923	-0.794766	AAMP	-	chr2_218269496_-
chr20:17951026-17951179:mpeak_52847|chr20_17949761_17970581_MGME1_NM_+|	70.7655	-1.85711	0.701105	-2.64883	0.00807716	0.0512349	5.10703	5.29314	1.70773	8.22673	12.3807	22.819	134.485	145.032	98.1948	156.308	110.474	149.158	3.20559	-1.84262	-0.139089	-1.70353	MGME1	chr20:17951026:+;chr20:17951084:+;chr20:17951180:+	chr20_17970439_+;chr20_17970531_+
chr17:57088612-57088724:mpeak_38364|chr17_57060282_57184266_TRIM37_NM_-|	42.7372	-2.77482	0.942698	-2.94349	0.00324535	0.0284766	3.40469	2.11725	0.853867	29.8219	4.7618	16.1402	78.3079	75.1625	46.1088	77.1256	93.3313	85.7103	3.19463	-2.99199	-0.360124	-2.63186	TRIM37	-	-
chr5:179313952-179314096:mpeak_71706|chr5_179291128_179334856_TBC1D9B_NM_-|	192.09	-1.0716	0.503082	-2.13007	0.0331656	0.128726	6.80938	22.2312	19.639	15.4251	18.0948	15.0271	488.573	389.575	646.378	225.207	266.661	191.457	3.19309	0.00392947	1.15772	-1.15379	TBC1D9B	chr5:179313950:-;chr5:179313975:-;chr5:179314044:-	chr5_179886977_-;chr5_179887044_-
chr10:112359459-112359648:mpeak_12579|chr10_112327448_112363988_SMC3_NM_+|	40.4047	-4.57221	1.24808	-3.66338	0.000248905	0.00567048	0	2.11725	0	23.6519	9.5236	26.1583	61.2844	103.745	34.1547	55.5305	101.903	66.7872	3.18888	-4.80859	-0.17081	-4.63778	SMC3	chr10:112359571:+	-
chr2:128281247-128281310:mpeak_49233|chr2_128238751_128284087_IWS1_NM_-|	58.0455	-1.96465	0.992707	-1.97909	0.0478061	0.164916	5.10703	1.05863	0	9.25508	1.90472	11.6878	71.4985	142.915	75.9942	118.259	138.092	120.774	3.18466	-1.88971	-0.376965	-1.51275	IWS1	-	-
chr17:57164629-57164771:mpeak_38393|chr17_57060282_57184266_TRIM37_NM_-|	41.0698	-3.55756	1.12538	-3.16122	0.00157111	0.0178003	0	2.11725	0	12.3401	14.2854	8.3484	78.3079	75.1625	46.1088	77.1256	93.3313	85.7103	3.18258	-4.04601	-0.360124	-3.68589	TRIM37	-	-
chr9:35729043-35729136:mpeak_85264|chr9_35697913_35732392_TLN1_NM_-|	52.8092	-2.37227	0.749427	-3.16545	0.00154845	0.0176381	3.40469	5.29314	7.68481	4.11337	0.95236	8.90496	151.509	229.722	134.057	25.7085	29.5232	32.8371	3.17932	0.229764	2.54868	-2.31891	TLN1	chr9:35729049:-;chr9:35729084:-	chr9_35729053_-;chr9_35729089_-
chr22:36688047-36688320:mpeak_56740|chr22_36678831_36784112_MYH9_NM_-|	532.194	-1.75545	0.580658	-3.02321	0.00250112	0.0240221	80.0102	27.5243	49.5243	59.6438	21.9043	41.742	2202.83	1391.04	1346.55	404.138	408.563	352.859	3.17906	0.349248	2.08361	-1.73436	MYH9	chr22:36688152:-;chr22:36688183:-	chr22_36292001_-;chr22_36292094_-;chr22_36292189_-
chr11:118638937-118639070:mpeak_17101|chr11_118622806_118661972_DDX6_NM_-|	1368.5	-0.76743	0.316015	-2.42846	0.015163	0.0774835	100.438	59.2831	84.5329	164.535	119.997	145.819	2245.39	2741.84	2705.05	2646.95	2462.8	2945.32	3.17531	-0.817129	-0.0664844	-0.750645	DDX6	-	-
chr16:69404233-69404347:mpeak_34013|chr16_69390959_69419891_TERF2_NM_-|	170.31	-1.68093	0.418785	-4.01382	5.97442e-05	0.00242768	11.9164	12.7035	13.6619	19.5385	26.6661	27.2715	330.255	401.22	474.75	244.745	233.328	247.669	3.17369	-0.940614	0.732969	-1.67358	TERF2	chr16:69404237:-;chr16:69404289:-	chr16_69370338_-;chr16_69370376_-
chr7:66522719-66522867:mpeak_78284|chr7_66461791_66703294_TYW1_NM_+|	42.8496	-2.00008	0.967209	-2.06788	0.0386511	0.142885	3.40469	3.17588	0	3.08503	6.66652	3.89592	110.652	52.9314	147.719	49.3604	60.9511	72.3528	3.17082	-1.05235	0.769124	-1.82147	TYW1	-	-
chr10:105750430-105750490:mpeak_12474|chr10_105726942_105785331_SLK_NM_+|	63.9348	-1.54203	0.771774	-1.99803	0.0457132	0.160119	0	1.05863	5.97707	7.19839	6.66652	14.4706	100.438	101.628	131.496	95.6358	152.378	150.271	3.16389	-2.00984	-0.255844	-1.754	SLK	-	chr10_103990708_+
chr7:132938700-132938775:mpeak_80063|chr7_132937822_133749043_EXOC4_NM_+|	135.274	-1.6877	0.603857	-2.79487	0.00519204	0.0383259	10.2141	3.17588	16.2235	14.3968	22.8566	23.9321	228.114	273.126	435.472	183.045	219.043	193.683	3.16142	-1.04694	0.652849	-1.69979	EXOC4	chr7:132938755:+	chr7_133253999_+
chrX:76909575-76909702:mpeak_89683|chrX_76764107_77041755_ATRX_NM_-|	107.696	-2.05555	0.538694	-3.8158	0.000135745	0.00401163	3.40469	6.35176	5.97707	30.8503	29.5232	32.8371	131.081	200.081	169.066	197.442	208.567	277.167	3.14528	-2.56665	-0.449674	-2.11698	ATRX	-	chrX_77654124_-
chr11:118318716-118318771:mpeak_17043|chr11_118307204_118392611_KMT2A_NM_+|	77.9823	-1.97468	0.976261	-2.0227	0.0431042	0.15411	5.10703	0	0	1.02834	5.71416	4.45248	171.937	174.674	143.45	151.166	141.902	136.357	3.12637	-1.13229	0.190552	-1.32285	KMT2A	chr11:118318773:+	chr11_118448077_+
chr10:32304430-32304519:mpeak_10156|chr10_32300444_32345371_KIF5B_NM_-|	340.721	-2.01049	0.462816	-4.34404	1.39888e-05	0.000856761	8.51172	15.8794	14.5157	91.5224	145.711	86.8234	386.432	497.555	363.748	682.819	964.741	830.388	3.1182	-3.05815	-0.989835	-2.06832	KIF5B	-	-
chr16:30978184-30978252:mpeak_33186|chr16_30968614_30995170_SETD1A_NM_+|	76.2195	-1.45527	0.681365	-2.13582	0.0326938	0.127575	10.2141	5.29314	0.853867	12.3401	7.61888	6.12216	148.104	155.618	222.859	103.863	107.617	134.131	3.10703	-0.67274	0.607511	-1.28025	SETD1A	-	-
chr19:2328389-2328619:mpeak_41734|chr19_2321821_2328614_LSM7_NM_-|	124.048	-1.3063	0.56712	-2.30339	0.0212567	0.0951597	5.10703	6.35176	9.39254	31.8786	18.0948	11.1312	221.305	221.253	230.544	206.697	261.899	264.923	3.0978	-1.55114	-0.124008	-1.42713	LSM7	-	chr19_2328472_-;chr19_2328563_-
chr19:39335164-39335419:mpeak_43842|chr19_39327420_39342979_HNRNPL_NM_-mpeak_43842|chr19_39327420_39342979_HNRNPL_NM_-||	223.135	-2.37551	0.528503	-4.49479	6.964e-06	0.000562191	11.9164	16.938	27.3238	39.077	41.9038	31.7239	677.533	366.285	788.12	199.498	212.376	264.923	3.0666	-1.00447	1.43657	-2.44104	HNRNPL	-	chr19_38844735_-
chr2:203157941-203158189:mpeak_51109|chr2_203130514_203168108_NOP58_NM_+|	56.6619	-3.14179	1.12244	-2.79907	0.00512498	0.0380004	0	2.11725	0	10.2834	18.0948	12.2443	54.475	94.2178	58.9169	140.883	165.711	123	3.05947	-4.26202	-1.0491	-3.21292	NOP58	-	chr2_202293497_+
chr17:28252235-28252293:mpeak_36754|chr17_27959949_28257246_SSH2_NM_-|	34.1399	-2.43337	0.922224	-2.63858	0.00832529	0.0523942	0	1.05863	2.5616	9.25508	7.61888	9.46152	34.0469	75.1625	68.3094	69.9272	57.1416	75.1356	3.05902	-2.86285	-0.187843	-2.67501	SSH2	chr17:28252209:-;chr17:28252239:-	chr17_29925212_-;chr17_29925252_-
chr17:38569437-38569527:mpeak_37322|chr17_38545899_38574202_TOP2A_NM_-|	235.151	-1.61256	0.548133	-2.94191	0.0032619	0.0285104	17.0234	23.2898	9.39254	22.6235	30.4755	41.742	520.918	746.332	362.04	339.353	368.563	340.058	3.05076	-0.932098	0.636639	-1.56874	TOP2A	-	chr17_40413197_-
chr1:155943091-155943198:mpeak_6027|chr1_155917806_155948336_ARHGEF2_NM_-|	57.4075	-2.33662	0.824632	-2.83353	0.00460372	0.0356325	0	9.52765	0.853867	5.14171	8.57124	3.33936	197.472	120.684	192.974	45.247	59.9987	45.0814	3.04664	-0.715951	1.76558	-2.48153	ARHGEF2	-	-
chr2:99980089-99980341:mpeak_48533|chr2_99953833_100015769_EIF5B_NM_+|	245.816	-1.53202	0.73813	-2.07554	0.0379361	0.141071	1.70234	27.5243	5.1232	50.3887	51.4274	47.8642	316.636	514.493	297.146	395.912	623.796	617.782	3.04446	-2.12351	-0.537367	-1.58614	EIF5B	chr2:99980326:+	chr2_99363692_+;chr2_99363778_+;chr2_99363797_+;chr2_99363853_+
chr2:36810489-36810543:mpeak_46609|chr2_36780322_36825332_FEZ2_NM_-|	42.6418	-2.85865	1.04433	-2.7373	0.00619458	0.0433178	5.10703	1.05863	0	14.3968	0.95236	5.5656	124.271	76.2212	104.172	50.3887	59.9987	69.57	3.03564	-1.76219	0.759564	-2.52176	FEZ2	-	-
chr1:36766409-36766669:mpeak_1859|chr1_36690016_36769396_THRAP3_NM_+|	302.954	-1.06874	0.464363	-2.30153	0.0213618	0.0954604	37.4516	31.7588	16.2235	15.4251	10.476	16.1402	927.778	795.029	1092.1	195.385	239.995	257.687	3.03506	1.023	2.02202	-0.999019	THRAP3	-	chr1_36300889_+;chr1_36300970_+
chr10:131936971-131937101:mpeak_13227|chr10_131934638_131978376_GLRX3_NM_+|	73.79	-2.10396	0.831582	-2.53007	0.011404	0.0650695	0	0	5.97707	1.02834	8.57124	5.00904	165.127	220.194	205.782	76.0973	111.426	86.2668	3.03351	-1.28931	1.11034	-2.39965	GLRX3	chr10:131937022:+	chr10_130138763_+
chr4:39528895-39529012:mpeak_64018|chr4_39501873_39529218_UGDH_NM_-|	1002.94	-1.20418	0.454442	-2.6498	0.00805389	0.0511816	71.4985	50.8141	79.4097	165.563	81.903	90.7193	1903.22	2701.62	2061.24	1394.43	1962.81	1472.1	3.0261	-0.745444	0.465009	-1.21045	UGDH	-	-
chr20:40096674-40096815:mpeak_53563|chr20_40034129_40247133_CHD6_NM_-|	35.019	-2.01773	0.927698	-2.17498	0.0296312	0.119259	1.70234	5.29314	0.853867	7.19839	1.90472	7.23528	108.95	107.98	42.6934	47.3037	52.3798	36.733	3.02336	-1.05762	0.928402	-1.98602	CHD6	-	-
chr22:18381843-18381898:mpeak_55951|chr22_18273682_18507325_MICAL3_NM_-|	15.0145	-4.14835	1.41624	-2.92912	0.00339922	0.0291974	0	1.05863	0	4.11337	6.66652	2.22624	40.8563	31.7588	33.3008	19.5385	29.5232	11.1312	2.99849	-3.61892	0.815255	-4.43418	MICAL3	chr22:18381847:-	chr22_17899082_-
chr11:62607421-62607544:mpeak_15075|chr11_62600603_62607628_WDR74_NM_-|	62.1676	-3.32978	0.92383	-3.60432	0.000312965	0.00662953	3.40469	5.29314	0	28.7936	3.80944	15.0271	108.95	152.442	174.189	77.1256	92.3789	84.5972	2.99525	-2.45315	0.777536	-3.23068	WDR74	-	-
chr8:103407368-103407524:mpeak_83358|chr8_103266742_103424917_UBR5_NM_-|	146.159	-2.6155	0.958409	-2.729	0.00635258	0.0437232	10.2141	0	0	13.3684	6.66652	11.1312	291.101	538.841	194.682	189.215	257.137	241.547	2.99058	-1.60942	0.574825	-2.18425	UBR5	-	-
chr9:97369104-97369249:mpeak_86201|chr9_97365854_97402531_FBP1_NM_-|	266.738	-0.90685	0.427743	-2.12008	0.0339993	0.130323	25.5352	14.8208	22.2006	28.7936	13.333	13.914	660.51	676.463	758.234	302.332	355.23	329.484	2.9857	0.158687	1.0859	-0.927216	FBP1	-	-
chr20:30903999-30904133:mpeak_53135|chr20_30865453_30919025_KIF3B_NM_+|	67.8421	-2.5697	0.860553	-2.98611	0.00282554	0.0259133	1.70234	4.23451	0	25.7085	8.57124	17.2534	88.5219	127.035	82.8251	114.146	177.139	166.968	2.98452	-3.11773	-0.618982	-2.49875	KIF3B	chr20:30904122:+	-
chr11:9332351-9332406:mpeak_13689|chr11_9302588_9336315_TMEM41B_NR_-mpeak_13689|chr11_9305140_9336315_TMEM41B_NM_-||	29.083	-3.21992	1.00236	-3.21235	0.00131655	0.0159192	1.70234	2.11725	0	9.25508	3.80944	8.3484	62.9868	62.459	66.6017	40.1053	34.285	57.3257	2.98333	-2.48699	0.544032	-3.03102	TMEM41B	-	chr11_9310803_-
chr7:23561782-23562056:mpeak_77277|chr7_23545188_23571660_TRA2A_NM_-|	642.243	-1.29568	0.391723	-3.30765	0.000940825	0.0129932	22.1305	52.9314	25.616	95.6358	97.1407	98.5112	1028.22	1181.43	1176.63	1068.45	1486.63	1373.59	2.97312	-1.5327	-0.214343	-1.31835	TRA2A	-	-
chr20:61533769-61533825:mpeak_54679|chr20_61513766_61569304_DIDO1_NM_-|	69.6739	-2.18498	0.773361	-2.8253	0.00472358	0.036309	1.70234	10.5863	5.1232	14.3968	5.71416	8.3484	297.91	186.318	107.587	79.1823	68.5699	50.647	2.9421	-0.708835	1.57674	-2.28558	DIDO1	chr20:61533769:-	chr20_62902418_-
chr3:87289866-87289953:mpeak_59798|chr3_87276412_87302861_CHMP2B_NM_+|	193.428	-1.34231	0.631857	-2.12439	0.0336375	0.129642	13.6188	12.7035	3.41547	44.2187	12.3807	27.2715	294.506	383.223	337.278	360.948	438.086	393.488	2.92981	-1.49587	-0.232527	-1.26335	CHMP2B	chr3:87289941:+	-
chr14:88432118-88432207:mpeak_27416|chr14_88401222_88460009_GALC_NM_-|	61.9331	-2.16208	0.90422	-2.3911	0.016798	0.0824825	0	4.23451	0	3.08503	5.71416	4.45248	119.164	145.032	169.92	80.2107	102.855	108.529	2.9263	-1.64591	0.574115	-2.22002	GALC	chr14:88432117:-	chr14_87965774_-
chr17:65901776-65901896:mpeak_39194|chr17_65821779_65978367_BPTF_NM_+|	59.658	-2.69707	1.17408	-2.29717	0.021609	0.0962274	3.40469	0	0	7.19839	5.71416	2.7828	158.318	115.39	75.9942	102.834	125.712	118.547	2.92079	-2.20474	0.0108063	-2.21555	BPTF	-	-
chr17:65919052-65919112:mpeak_39199|chr17_65821779_65978367_BPTF_NM_+|	61.5214	-1.67076	0.710929	-2.35011	0.0187679	0.0882237	3.40469	4.23451	2.5616	10.2834	7.61888	13.3574	158.318	115.39	75.9942	102.834	125.712	118.547	2.91699	-1.61562	0.0108063	-1.62643	BPTF	-	-
chr5:65320125-65320188:mpeak_68213|chr5_65222381_65374250_ERBB2IP_NM_+|	114.932	-1.65091	0.662558	-2.49172	0.0127127	0.0695906	5.10703	5.29314	2.5616	28.7936	19.9996	25.0452	108.95	227.605	108.441	289.992	281.899	275.497	2.91278	-2.51011	-0.92923	-1.58088	ERBB2IP	-	-
chr13:22069227-22069380:mpeak_22979|chr13_22067492_22178355_MICU2_NM_-|	159.498	-1.17516	0.523492	-2.24486	0.0247772	0.105129	6.80938	5.29314	8.53867	33.9353	19.0472	22.2624	267.268	261.481	180.166	390.77	323.802	394.601	2.91166	-1.86607	-0.6458	-1.22027	MICU2	chr13:22069229:-	chr13_21495092_-
chr5:176718933-176719112:mpeak_71459|chr5_176560079_176720832_NSD1_NM_+|	79.6808	-1.57844	0.623708	-2.53074	0.0113823	0.0650019	0	4.23451	4.26934	13.3684	7.61888	11.1312	153.211	149.266	135.765	173.79	157.139	146.375	2.91067	-1.91722	-0.123181	-1.79404	NSD1	-	-
chr1:220972480-220972553:mpeak_8285|chr1_220960038_220986633_MARC1_NM_+|	78.4463	-1.57908	0.738949	-2.13693	0.0326036	0.127341	5.10703	0	5.1232	3.08503	6.66652	10.5746	223.007	173.615	131.496	141.911	119.997	120.774	2.90567	-0.9905	0.464713	-1.45521	MARC1	chr1:220972531:+;chr1:220972568:+	chr1_220799156_+;chr1_220799188_+;chr1_220799223_+
chr17:60642446-60642508:mpeak_38867|chr17_60556385_60689752_TLK2_NM_+|	113.79	-1.9406	0.98116	-1.97786	0.0479441	0.165262	5.10703	0	0	10.2834	4.7618	5.5656	160.02	237.133	134.057	268.397	275.232	264.923	2.88419	-2.01284	-0.606058	-1.40679	TLK2	-	-
chr17:73016423-73016493:mpeak_39421|chr17_73008758_73017015_ICT1_NM_+|	161.931	-1.7842	0.586259	-3.04337	0.00233948	0.0229389	10.2141	4.23451	19.639	25.7085	14.2854	26.7149	359.195	351.464	474.75	182.016	279.042	195.909	2.87559	-0.968634	0.851492	-1.82013	ICT1	-	-
chr20:61527765-61527954:mpeak_54678|chr20_61513766_61569304_DIDO1_NM_-|	69.2085	-2.13573	1.04734	-2.0392	0.0414305	0.149645	11.9164	4.23451	0.853867	17.4818	1.90472	3.89592	297.91	186.318	107.587	79.1823	68.5699	50.647	2.87332	-0.453302	1.57674	-2.03004	DIDO1	chr20:61527829:-	chr20_62896539_-
chr22:38156062-38156361:mpeak_56798|chr22_38092994_38169789_TRIOBP_NM_+|	78.854	-1.94016	0.594481	-3.26362	0.00109998	0.0141508	5.10703	8.46902	5.1232	13.3684	5.71416	8.90496	228.114	178.908	245.06	74.0406	70.4747	102.964	2.86762	-0.581805	1.39775	-1.97955	TRIOBP	chr22:38156121:+;chr22:38156200:+;chr22:38156355:+	chr22_37760046_+;chr22_37760106_+;chr22_37760350_+
chr11:64003753-64003803:mpeak_15181|chr11_64002055_64005827_VEGFB_NM_+|	15.726	-3.55016	1.42843	-2.48536	0.0129422	0.0702761	0	0	0.853867	8.22673	3.80944	2.22624	17.0234	39.1692	33.3008	20.5668	39.0468	24.4887	2.86233	-4.06206	0.0896383	-4.1517	VEGFB	-	chr11_64236302_+;chr11_64236320_+
chr16:31086164-31086232:mpeak_33200|chr16_31085742_31094291_ZNF646_NM_+|	35.1338	-2.87368	1.01267	-2.83774	0.00454346	0.0354822	3.40469	2.11725	0	6.17005	1.90472	5.00904	125.974	51.8727	111.857	30.8503	45.7133	36.733	2.85911	-1.24453	1.35447	-2.59901	ZNF646	-	-
chr3:186506022-186506218:mpeak_62584|chr3_186501360_186506913_EIF4A2_NM_+|	282.285	-1.67241	0.713057	-2.3454	0.0190064	0.0889492	11.9164	33.8761	4.26934	47.3037	50.4751	35.0633	687.747	644.704	419.249	393.855	657.129	401.837	2.8579	-1.40793	0.2699	-1.67783	EIF4A2	chr3:186506064:+;chr3:186506216:+	chr3_186788309_+;chr3_186788393_+;chr3_186788426_+
chr10:125770872-125771029:mpeak_13032|chr10_125769855_125853123_CHST15_NM_-|	43.7817	-2.29208	1.14789	-1.99677	0.0458502	0.160333	0	2.11725	0	3.08503	6.66652	4.45248	86.8196	78.3384	57.2091	113.118	82.8553	90.7193	2.85643	-2.74603	-0.366559	-2.37947	CHST15	chr10:125770977:-	chr10_124011462_-
chr19:15283077-15283292:mpeak_42723|chr19_15272525_15311792_NOTCH3_NM_-|	78.2744	-2.86517	0.771872	-3.71198	0.000205647	0.00517301	8.51172	5.29314	0	9.25508	6.66652	5.00904	219.602	178.908	333.008	47.3037	69.5223	56.2126	2.83073	-0.60044	2.0798	-2.68024	NOTCH3	-	-
chr7:106924544-106924600:mpeak_79507|chr7_106844075_107204959_COG5_NM_-|	28.04	-3.85338	1.26581	-3.04421	0.0023329	0.0229009	0	0	1.70773	11.3118	6.66652	5.00904	35.7492	64.5763	81.1174	31.8786	69.5223	28.9411	2.82359	-3.75068	0.477213	-4.2279	COG5	-	-
chr12:93175716-93175787:mpeak_20872|chr12_93169909_93323107_EEA1_NM_-|	40.6797	-4.54332	1.27167	-3.57272	0.000353292	0.00706121	0	0	0.853867	30.8503	28.5708	38.4027	42.5586	28.5829	19.639	89.4657	105.712	103.52	2.82175	-6.84003	-1.71823	-5.1218	EEA1	-	-
chr15:91524722-91524895:mpeak_31035|chr15_91510432_91537881_PRC1_NM_-|	286.572	-1.92924	0.606514	-3.18086	0.00146838	0.0169919	32.3446	9.52765	20.4928	56.5588	16.1901	37.2895	716.687	632.001	862.406	308.503	369.516	377.348	2.82055	-0.819199	1.06702	-1.88622	PRC1	-	-
chr10:34558579-34558673:mpeak_10251|chr10_34400490_35104253_PARD3_NM_-|	28.28	-3.56393	1.34208	-2.65553	0.0079185	0.0505864	1.70234	0	0	7.19839	0	4.45248	61.2844	58.2245	62.3323	44.2187	40.9515	58.9954	2.80851	-2.77484	0.334953	-3.1098	PARD3	-	-
chr17:73470374-73470424:mpeak_39482|chr17_73452663_73495342_KIAA0195_NM_+|	74.7115	-1.83347	0.670401	-2.73489	0.00624006	0.0434082	1.70234	6.35176	4.26934	20.5668	12.3807	10.5746	100.438	155.618	183.581	109.004	165.711	126.339	2.80309	-1.82034	0.13252	-1.95286	KIAA0195	-	-
chr3:119395983-119396121:mpeak_60355|chr3_119388512_119396243_COX17_NM_-|	481.519	-1.34848	0.677226	-1.99118	0.0464608	0.161667	35.7492	10.5863	21.3467	106.948	24.7614	81.2578	810.316	651.056	959.747	1030.4	961.884	1084.18	2.79549	-1.65378	-0.345598	-1.30818	COX17	-	-
chr13:37579198-37579337:mpeak_23462|chr13_37574677_37583320_EXOSC8_NM_+|	61.3242	-2.89791	0.960503	-3.01708	0.00255222	0.0242921	5.10703	2.11725	0	2.05668	9.5236	21.1493	120.866	138.68	129.788	96.6641	111.426	98.5112	2.78332	-2.17967	0.344646	-2.52431	EXOSC8	-	-
chr19:17972095-17972235:mpeak_42908|chr19_17970686_17973979_RPL18A_NM_+|	527.722	-1.25113	0.547762	-2.28408	0.022367	0.098667	39.1539	14.8208	41.8395	83.2957	30.4755	57.8823	1176.32	1007.81	1271.41	781.54	927.599	900.515	2.77277	-0.841187	0.405054	-1.24624	RPL18A	-	-
chr6:43395968-43396043:mpeak_73729|chr6_43395291_43417666_ABCC10_NM_+|	36.1801	-4.46503	1.00032	-4.4636	8.05936e-06	0.000630719	0	3.17588	0	6.17005	1.90472	6.67872	117.462	122.801	104.172	21.5952	25.7137	24.4887	2.76617	-2.21583	2.26222	-4.47805	ABCC10	chr6:43396019:+;chr6:43396045:+	chr6_43428305_+
chr3:63891459-63891587:mpeak_59476|chr3_63850232_63985125_ATXN7_NM_+|	98.9093	-1.57737	0.788558	-2.00032	0.0454663	0.159386	6.80938	1.05863	0	12.3401	10.476	7.23528	163.425	138.68	124.665	226.235	210.472	285.515	2.76543	-1.93336	-0.758984	-1.17438	ATXN7	chr3:63891556:+	-
chr10:105778448-105778586:mpeak_12480|chr10_105726942_105785331_SLK_NM_+|	65.4553	-2.57474	0.926578	-2.77876	0.00545669	0.0396219	0	5.29314	0.853867	28.7936	4.7618	13.914	100.438	101.628	131.496	95.6358	152.378	150.271	2.76425	-2.94904	-0.255844	-2.6932	SLK	-	-
chr22:29195026-29195508:mpeak_56427|chr22_29191720_29196560_XBP1_NM_-|	3871.31	-0.994776	0.415321	-2.3952	0.0166113	0.0819131	228.114	167.263	280.069	441.159	263.804	409.628	7435.84	6470.33	10533.3	5965.41	6617	7643.8	2.76375	-0.722602	0.272988	-0.99559	XBP1	chr22:29195045:-;chr22:29195182:-;chr22:29195339:-	chr22_28799065_-;chr22_28799158_-;chr22_28799231_-;chr22_28799328_-;chr22_28799438_-
chr2:68385340-68385568:mpeak_47534|chr2_68385004_68401866_PNO1_NM_+|	62.5645	-2.09363	0.758596	-2.75987	0.0057824	0.0413126	6.80938	1.05863	3.41547	20.5668	3.80944	8.3484	151.509	119.625	137.473	99.7491	110.474	87.9365	2.76145	-1.53617	0.454627	-1.99079	PNO1	-	-
chr16:19083372-19083436:mpeak_32426|chr16_19078916_19089402_COQ7_NM_+|	46.9917	-1.91691	0.899069	-2.13211	0.0329977	0.128287	1.70234	3.17588	0	6.17005	2.85708	7.79184	95.3313	70.928	99.9025	76.0973	98.0931	101.851	2.74921	-1.78566	-0.0525784	-1.73308	COQ7	chr16:19083428:+	-
chr8:103289266-103289435:mpeak_83340|chr8_103266742_103424917_UBR5_NM_-|	148.927	-1.40248	0.676329	-2.07367	0.03811	0.141619	15.3211	4.23451	8.53867	12.3401	15.2378	18.923	291.101	538.841	194.682	189.215	257.137	241.547	2.74191	-0.726982	0.574825	-1.30181	UBR5	-	-
chr7:143097520-143097631:mpeak_80395|chr7_143088628_143105985_EPHA1_NM_-|	58.9961	-1.62914	0.790004	-2.0622	0.0391889	0.144136	8.51172	2.11725	1.70773	5.14171	1.90472	8.3484	112.355	148.208	190.412	58.6155	83.8077	86.8234	2.73556	-0.319488	0.976147	-1.29564	EPHA1	chr7:143097524:-	chr7_143400432_-
chr17:75094962-75095078:mpeak_39652|chr17_75084724_75209999_SEC14L1_NM_+|	47.0336	-1.85626	0.820028	-2.26366	0.0235953	0.102225	3.40469	2.11725	4.26934	3.08503	11.4283	3.89592	149.806	74.1039	134.057	55.5305	74.2841	48.4207	2.73524	-0.910863	1.00605	-1.91691	SEC14L1	chr17:75095024:+;chr17:75095076:+;chr17:75095124:+	chr17_77098936_+;chr17_77098993_+
chr14:50255867-50256070:mpeak_25769|chr14_50251431_50319791_NEMF_NM_-|	31.7	-3.46136	1.43511	-2.41192	0.0158687	0.0794564	0	1.05863	0	9.25508	8.57124	10.0181	47.6657	59.2831	9.39254	70.9556	79.0459	85.1537	2.7298	-4.71712	-1.01525	-3.70187	NEMF	-	-
chr14:75570126-75570192:mpeak_27131|chr14_75551389_75593778_NEK9_NM_-|	75.2296	-2.10155	0.5964	-3.52373	0.000425513	0.00786211	8.51172	4.23451	4.26934	6.17005	8.57124	10.0181	192.365	204.315	227.129	99.7491	69.5223	67.9004	2.72769	-0.541119	1.39517	-1.93629	NEK9	chr14:75570131:-	chr14_75103417_-
chr16:14294437-14294581:mpeak_32180|chr16_14165169_14354765_MKL2_NM_+|	44.4986	-3.90199	1.21521	-3.21095	0.00132298	0.0159741	0	2.11725	0	17.4818	5.71416	13.914	49.368	123.859	59.7707	105.919	85.7124	70.1266	2.7261	-4.13154	-0.167916	-3.96362	MKL2	chr16:14294558:+;chr16:14294586:+	-
chr3:25668665-25668726:mpeak_58152|chr3_25639968_25705863_TOP2B_NM_-|	235.967	-2.70501	0.54308	-4.98087	6.32979e-07	0.000109182	17.0234	9.52765	8.53867	95.6358	73.3317	50.0904	439.205	534.607	315.077	323.928	454.276	510.366	2.72248	-2.64219	0.000357849	-2.64255	TOP2B	-	-
chr7:155465553-155465603:mpeak_80733|chr7_155437202_155567686_RBM33_NM_+|	57.2593	-2.83105	1.19644	-2.36624	0.0179697	0.086051	3.40469	0	0	5.14171	0	6.67872	105.545	139.739	130.642	73.0123	126.664	96.2849	2.71704	-1.79569	0.345041	-2.14073	RBM33	-	chr7_155672908_+
chr5:65338933-65339037:mpeak_68217|chr5_65222381_65374250_ERBB2IP_NM_+|	112.732	-1.6496	0.755809	-2.18256	0.0290682	0.117608	0	6.35176	1.70773	21.5952	12.3807	18.3665	108.95	227.605	108.441	289.992	281.899	275.497	2.71671	-2.69922	-0.92923	-1.76999	ERBB2IP	-	-
chr2:99985846-99985948:mpeak_48534|chr2_99953833_100015769_EIF5B_NM_+|	242.185	-1.30103	0.530854	-2.45082	0.0142532	0.0744088	10.2141	8.46902	11.9541	28.7936	40.9515	40.0723	316.636	514.493	297.146	395.912	623.796	617.782	2.7154	-1.84175	-0.537367	-1.30438	EIF5B	chr2:99985944:+	chr2_99369479_+
chr4:39313059-39313151:mpeak_63987|chr4_39290464_39368001_RFC1_NM_-|	94.4037	-2.36054	0.744112	-3.1723	0.00151238	0.0172739	3.40469	5.29314	0	21.5952	13.333	15.5837	129.378	181.025	170.773	134.713	209.519	248.226	2.71142	-2.5379	-0.300145	-2.23775	RFC1	-	-
chr14:31590581-31590644:mpeak_25310|chr14_31570273_31676729_HECTD1_NM_-|	134.986	-1.6067	0.619407	-2.59394	0.00948838	0.0574877	8.51172	12.7035	3.41547	17.4818	19.9996	13.914	318.338	407.572	183.581	195.385	235.233	203.701	2.70819	-1.06118	0.519852	-1.58103	HECTD1	-	-
chr6:143832538-143832589:mpeak_75707|chr6_143816984_143833020_FUCA2_NM_-|	278.159	-1.20313	0.453748	-2.65153	0.00801274	0.0510352	30.6422	9.52765	13.6619	16.4535	22.8566	29.4977	636.677	656.349	698.464	374.316	440.943	408.515	2.70309	-0.354115	0.70251	-1.05663	FUCA2	-	-
chr9:131451838-131451945:mpeak_87589|chr9_131445933_131456919_SET_NM_+|	4033.58	-0.638238	0.324533	-1.96663	0.0492256	0.168511	226.412	172.556	186.143	433.96	247.614	358.981	6392.31	7899.48	7488.42	7883.27	8416.96	8696.81	2.68644	-0.830571	-0.19874	-0.631831	SET	chr9:131451934:+	chr9_128689653_+
chr5:41762200-41762261:mpeak_67767|chr5_41731872_41870791_OXCT1_NM_-|	30.6397	-3.80822	1.15258	-3.30409	0.00095284	0.0130525	0	2.11725	0	6.17005	2.85708	5.5656	85.1172	67.7522	84.5329	42.162	41.9038	29.4977	2.67553	-2.78498	1.06383	-3.84882	OXCT1	-	-
chr14:104304634-104304705:mpeak_28188|chr14_104201532_104313927_PPP1R13B_NM_-|	31.2927	-4.61424	1.28444	-3.5924	0.000327644	0.00682466	0	2.11725	0	8.22673	2.85708	13.3574	73.2008	40.2278	124.665	45.247	33.3326	32.2805	2.66776	-3.52905	1.10279	-4.63184	PPP1R13B	-	-
chr7:878740-878818:mpeak_76578|chr7_855193_912851_SUN1_NM_+|	162.66	-2.15368	0.471597	-4.56679	4.95254e-06	0.000465099	5.10703	16.938	14.5157	19.5385	17.1425	23.3755	529.429	345.113	498.659	165.563	165.711	150.828	2.66245	-0.716022	1.51013	-2.22616	SUN1	chr7:878817:+	chr7_839178_+
chr7:56049899-56049965:mpeak_78014|chr7_56032269_56066700_GBAS_NM_+|	73.4285	-2.37116	0.77099	-3.07548	0.00210164	0.021531	3.40469	0	3.41547	18.5102	7.61888	13.3574	98.736	145.032	144.304	135.741	181.901	129.122	2.63617	-2.53348	-0.20319	-2.33029	GBAS	-	-
chr6:132165634-132165765:mpeak_75406|chr6_132129155_132211480_ENPP1_NM_+|	167.705	-3.17541	0.539733	-5.88329	4.0218e-09	2.67092e-06	3.40469	10.5863	0	46.2754	63.8081	48.9773	263.863	265.715	268.968	350.665	316.184	374.009	2.62808	-3.50701	-0.382322	-3.12469	ENPP1	-	-
chr5:10285729-10285878:mpeak_67240|chr5_10280744_10308168_CMBL_NM_-|	128.529	-2.63734	0.528042	-4.99457	5.89683e-07	0.000108328	5.10703	10.5863	4.26934	27.7652	36.1897	41.742	267.268	304.885	191.266	236.519	195.234	221.511	2.6149	-2.40456	0.22481	-2.62937	CMBL	-	chr5_10285726_-
chr17:65239895-65239963:mpeak_39152|chr17_65074702_65241319_HELZ_NM_-|	131.5	-2.18774	0.622067	-3.5169	0.000436625	0.0080051	5.10703	6.35176	0	23.6519	11.4283	23.9321	229.817	207.491	220.298	269.426	299.993	280.506	2.61376	-2.36456	-0.370114	-1.99445	HELZ	-	-
chr6:152201702-152201914:mpeak_76058|chr6_152011630_152419866_ESR1_NM_+|	787.14	-1.01964	0.457606	-2.2282	0.0258674	0.107966	61.2844	23.2898	33.3008	109.004	54.2845	71.2397	1581.48	1457.73	1482.31	1627.86	1472.35	1471.55	2.60698	-0.992505	-0.0159409	-0.976564	ESR1	-	-
chr16:69413013-69413105:mpeak_34014|chr16_69390959_69419891_TERF2_NM_-|	168.302	-1.5977	0.440734	-3.62509	0.000288859	0.00622815	10.2141	11.6449	9.39254	17.4818	19.9996	18.923	330.255	401.22	474.75	244.745	233.328	247.669	2.59085	-0.851882	0.732969	-1.58485	TERF2	chr16:69413037:-	chr16_69379116_-
chr1:193056783-193057001:mpeak_7303|chr1_193028551_193060780_TROVE2_NM_+|	51.2656	-2.57108	1.20926	-2.12616	0.0334898	0.129249	1.70234	0	0.853867	14.3968	12.3807	11.6878	47.6657	80.4557	20.4928	121.344	169.52	134.688	2.58005	-3.91148	-1.51776	-2.39371	TROVE2	-	chr1_193087675_+;chr1_193087718_+;chr1_193087871_+;chr1_193087912_+
chr10:72604223-72604407:mpeak_11067|chr10_72575703_72636951_SGPL1_NM_+|	211.988	-1.67345	0.525873	-3.18223	0.00146147	0.016972	6.80938	14.8208	17.0773	32.9069	16.1901	29.4977	417.075	404.396	687.363	279.709	328.564	309.448	2.56539	-1.02182	0.717306	-1.73913	SGPL1	-	-
chr16:1462679-1462745:mpeak_31427|chr16_1416396_1464721_UNKL_NM_-|	87.6392	-1.98665	0.932799	-2.12977	0.0331907	0.128726	0	0	5.1232	0	5.71416	10.5746	202.579	190.553	209.198	122.373	171.425	134.131	2.5517	-1.66876	0.493183	-2.16195	UNKL	chr16:1462684:-	chr16_1412678_-
chr17:65889480-65889653:mpeak_39190|chr17_65821779_65978367_BPTF_NM_+|	62.7822	-3.13689	0.854887	-3.66936	0.000243158	0.0056007	1.70234	4.23451	0	24.6802	14.2854	11.6878	158.318	115.39	75.9942	102.834	125.712	118.547	2.54653	-3.09289	0.0108063	-3.10369	BPTF	-	-
chr12:62950347-62950487:mpeak_20075|chr12_62860596_62986365_MON2_NM_+|	145.889	-1.27856	0.566874	-2.25546	0.0241047	0.103465	5.10703	9.52765	11.1003	12.3401	16.1901	14.4706	284.292	489.086	242.498	205.668	239.995	220.398	2.53328	-0.740634	0.608998	-1.34963	MON2	-	chr12_62556653_+
chr10:52098852-52098960:mpeak_10598|chr10_52067081_52383737_SGMS1_NM_-|	38.227	-2.89574	1.43057	-2.02419	0.0429509	0.153757	1.70234	0	0	1.02834	0	8.3484	64.6891	84.6902	54.6475	80.2107	77.1412	86.2668	2.50312	-2.46156	-0.255866	-2.2057	SGMS1	-	-
chr6:122954424-122954521:mpeak_75271|chr6_122793061_123046272_PKIB_NM_+|	60.8402	-1.66368	0.83738	-1.98677	0.0469477	0.163159	3.40469	1.05863	1.70773	15.4251	5.71416	11.1312	85.1172	80.4557	81.1174	125.458	115.236	204.258	2.50154	-2.38663	-0.850945	-1.53568	PKIB	-	chr6_122633357_+
chr17:2206310-2206364:mpeak_35346|chr17_1964916_2207069_SMG6_NM_-|	93.0828	-1.85516	0.619509	-2.99457	0.00274828	0.0254419	6.80938	3.17588	7.68481	20.5668	4.7618	8.3484	216.198	261.481	228.836	112.089	125.712	121.33	2.50102	-0.930458	0.976211	-1.90667	SMG6	chr17:2206308:-	chr17_2303018_-
chr9:125585325-125585482:mpeak_87166|chr9_125582915_125590935_PDCL_NM_-|	295.938	-1.1558	0.492277	-2.34787	0.018881	0.0885092	20.4281	19.0553	15.3696	30.8503	22.8566	15.5837	527.727	724.101	941.816	345.523	437.133	450.814	2.50054	-0.337088	0.830607	-1.16769	PDCL	-	-
chr1:223990968-223991022:mpeak_8351|chr1_223968596_224033674_TP53BP2_NM_-|	33.9676	-2.62729	1.13987	-2.3049	0.0211722	0.0951139	1.70234	3.17588	1.70773	10.2834	8.57124	0.55656	83.4149	75.1625	105.026	17.4818	70.4747	30.0543	2.49844	-1.55942	1.15945	-2.71887	TP53BP2	-	-
chr18:9520085-9520200:mpeak_40297|chr18_9475529_9535668_RALBP1_NM_+|	78.579	-2.39251	1.13295	-2.11175	0.0347078	0.131783	3.40469	0	0	5.14171	4.7618	5.00904	151.509	161.97	96.487	164.535	187.615	162.516	2.49144	-2.13093	-0.328131	-1.8028	RALBP1	chr18:9520197:+	-
chr4:7065779-7065970:mpeak_63532|chr4_7062935_7069800_GRPEL1_NM_-|	462.42	-1.15842	0.475612	-2.43564	0.0148654	0.0766345	37.4516	9.52765	21.3467	57.5871	32.3802	46.7511	886.922	925.24	939.254	997.491	791.411	803.673	2.4833	-1.0007	0.0857882	-1.08649	GRPEL1	chr4:7065787:-	chr4_7064060_-;chr4_7064115_-
chr9:139433651-139433721:mpeak_88102|chr9_139392010_139440238_NOTCH1_NM_-|	71.3408	-2.35941	0.676314	-3.48863	0.000485509	0.0085706	1.70234	5.29314	10.2464	7.19839	3.80944	6.67872	299.613	236.074	159.673	45.247	37.142	43.4117	2.47956	-0.0367352	2.46662	-2.50335	NOTCH1	-	-
chr8:30437786-30437927:mpeak_81578|chr8_30436554_30515738_GTF2E2_NM_-|	126.456	-1.21705	0.544794	-2.23396	0.0254855	0.107021	5.10703	9.52765	7.68481	13.3684	9.5236	10.5746	223.007	298.533	380.825	165.563	202.853	190.9	2.47344	-0.584422	0.690048	-1.27447	GTF2E2	-	-
chr13:42882686-42882750:mpeak_23664|chr13_42846288_42893223_AKAP11_NM_+|	40.1594	-2.52457	1.19365	-2.11499	0.0344307	0.131203	0	0	1.70773	5.14171	5.71416	5.00904	88.5219	78.3384	40.9856	101.806	62.8558	91.8324	2.4649	-3.21568	-0.30341	-2.91227	AKAP11	-	-
chr10:102758582-102758756:mpeak_12240|chr10_102756863_102766241_LZTS2_NM_+|	72.9255	-2.17368	0.727213	-2.98906	0.00279834	0.025757	6.80938	2.11725	6.83094	14.3968	3.80944	4.45248	211.091	155.618	273.238	58.6155	75.2365	62.8913	2.46233	-0.52402	1.70164	-2.22566	LZTS2	-	-
chr17:18811638-18811696:mpeak_36354|chr17_18759611_18833852_PRPSAP2_NM_+|	127.001	-1.97473	0.508583	-3.8828	0.000103259	0.00341641	6.80938	6.35176	9.39254	25.7085	16.1901	12.2443	333.66	268.891	317.639	154.251	184.758	188.117	2.45098	-1.26341	0.803782	-2.06719	PRPSAP2	-	-
chr4:103674543-103674659:mpeak_65395|chr4_103553438_103682151_MANBA_NM_-|	116.149	-2.44028	0.762809	-3.19908	0.00137868	0.0162974	8.51172	9.52765	0	4.11337	3.80944	11.1312	411.967	323.94	368.871	81.239	99.9978	70.6832	2.44928	-0.0789459	2.13272	-2.21167	MANBA	chr4:103674542:-;chr4:103674608:-	chr4_102753380_-;chr4_102753411_-
chr12:124118534-124118589:mpeak_22471|chr12_124118285_124144712_GTF2H3_NM_+|	145.919	-1.15248	0.520794	-2.21293	0.0269025	0.111352	5.10703	8.46902	3.41547	16.4535	17.1425	18.923	240.031	264.657	189.559	307.474	351.421	328.371	2.44748	-1.62802	-0.507991	-1.12003	GTF2H3	chr12:124118585:+	chr12_123634038_+
chr6:125550255-125550416:mpeak_75285|chr6_125474874_125583979_TPD52L1_NM_+|	253.785	-1.32004	0.656575	-2.01049	0.0443789	0.157113	22.1305	2.11725	15.3696	33.9353	12.3807	30.0543	594.118	442.506	583.191	416.478	422.848	470.293	2.44579	-0.946878	0.306682	-1.25356	TPD52L1	-	chr6_125229234_+
chr2:75881865-75882051:mpeak_47983|chr2_75873908_75882189_MRPL19_NM_+|	196.276	-1.14674	0.441656	-2.59645	0.00941933	0.0572338	5.10703	6.35176	17.9312	20.5668	21.9043	20.5927	415.372	362.051	427.788	337.296	348.564	371.782	2.43858	-1.10149	0.188433	-1.28992	MRPL19	-	chr2_75654896_+
chr19:46334382-46334499:mpeak_44357|chr19_46318955_46366548_SYMPK_NM_-|	353.689	-2.55809	0.451348	-5.66766	1.44758e-08	8.15663e-06	18.7258	24.3484	24.7622	52.4454	62.8558	58.9954	638.379	835.257	1323.49	394.883	433.324	376.791	2.42521	-1.36141	1.21492	-2.57633	SYMPK	-	-
chr6:17523688-17523838:mpeak_72283|chr6_17393735_17556589_CAP2_NM_+|	116.243	-1.41688	0.702878	-2.01583	0.0438176	0.155673	5.10703	5.29314	0	10.2834	4.7618	11.1312	197.472	264.657	181.874	241.66	262.851	209.823	2.42239	-1.33166	-0.149534	-1.18213	CAP2	-	-
chr2:99992759-99993099:mpeak_48536|chr2_99953833_100015769_EIF5B_NM_+|	247.397	-2.1131	0.741453	-2.84995	0.00437266	0.0344113	5.10703	12.7035	9.39254	85.3524	18.0948	72.3528	316.636	514.493	297.146	395.912	623.796	617.782	2.41104	-2.69209	-0.537367	-2.15473	EIF5B	chr2:99993099:+	chr2_99376406_+;chr2_99376448_+;chr2_99376493_+;chr2_99376620_+
chr12:112739412-112739720:mpeak_21714|chr12_112600327_112819896_HECTD4_NM_-|	40.8226	-2.27413	0.831763	-2.73411	0.00625488	0.0434398	1.70234	4.23451	2.5616	7.19839	3.80944	3.33936	136.188	125.977	90.5099	40.1053	51.4274	22.819	2.40972	-0.755496	1.62486	-2.38035	HECTD4	-	-
chr11:47256185-47256233:mpeak_14566|chr11_47236492_47260350_DDB2_NM_+|	153.89	-1.57951	0.763875	-2.06776	0.0386629	0.142885	15.3211	0	2.5616	14.3968	6.66652	6.67872	304.72	386.399	422.664	232.405	262.851	192.013	2.40837	-0.633508	0.69652	-1.33003	DDB2	-	-
chr12:120208581-120208707:mpeak_22008|chr12_120126060_120315095_CIT_NM_-|	52.1592	-2.5597	1.0018	-2.55509	0.0106159	0.0620081	3.40469	4.23451	0	5.14171	0	5.5656	214.495	143.973	117.834	41.1337	62.8558	27.2715	2.40578	-0.487103	1.85944	-2.34654	CIT	-	-
chr12:133257719-133257998:mpeak_22703|chr12_133201396_133264110_POLE_NM_-|	135.85	-1.25738	0.570923	-2.20236	0.02764	0.11357	13.6188	6.35176	10.2464	3.08503	6.66652	7.23528	442.61	468.972	349.232	106.948	129.521	85.7103	2.39662	0.830941	1.96842	-1.13748	POLE	-	-
chr6:132165862-132166035:mpeak_75407|chr6_132129155_132211480_ENPP1_NM_+|	156.343	-1.7606	0.711333	-2.47506	0.0133212	0.0713052	0	6.35176	0	14.3968	7.61888	8.3484	263.863	265.715	268.968	350.665	316.184	374.009	2.38625	-2.25714	-0.382322	-1.87481	ENPP1	-	-
chr2:159857583-159857711:mpeak_49921|chr2_159825145_160086088_TANC1_NM_+|	57.9038	-2.28558	0.81233	-2.8136	0.00489896	0.0371021	6.80938	5.29314	0.853867	2.05668	1.90472	7.79184	211.091	200.081	133.203	37.0203	38.0944	50.647	2.38005	0.140604	2.11391	-1.9733	TANC1	-	chr2_159001113_+;chr2_159001189_+
chr10:12292047-12292117:mpeak_9537|chr10_12237960_12292309_CDC123_NM_+|	226.839	-1.20346	0.425217	-2.83023	0.00465146	0.0359361	8.51172	8.46902	12.808	25.7085	19.0472	30.6108	413.67	389.575	452.55	473.037	406.658	481.425	2.3721	-1.33916	-0.116194	-1.22296	CDC123	-	-
chr6:13615687-13615860:mpeak_72192|chr6_13615558_13620985_NOL7_NM_+|	257.731	-1.23073	0.418153	-2.94324	0.00324792	0.0284766	3.40469	10.5863	14.5157	30.8503	39.0468	36.733	374.516	408.63	424.372	511.086	582.844	656.185	2.36077	-1.90324	-0.535405	-1.36784	NOL7	-	-
chr8:25180936-25180988:mpeak_81363|chr8_25042286_25268709_DOCK5_NM_+|	18.6016	-4.37734	1.37886	-3.1746	0.00150043	0.0171838	0	1.05863	0	3.08503	5.71416	5.00904	44.261	62.459	28.1776	21.5952	32.3802	19.4796	2.35429	-3.70526	0.876932	-4.58219	DOCK5	-	-
chr10:76735946-76736098:mpeak_11306|chr10_76586170_76788246_KAT6B_NM_+|	60.6957	-2.74231	1.36875	-2.00352	0.0451216	0.158507	1.70234	0	0	10.2834	0.95236	7.23528	45.9633	79.3971	92.2177	151.166	125.712	213.719	2.34722	-3.43967	-1.17301	-2.26667	KAT6B	-	-
chr16:312656-312738:mpeak_31315|chr16_284544_319518_ITFG3_NR_+mpeak_31315|chr16_284544_314809_ITFG3_NM_+||	115.163	-1.48262	0.631854	-2.34645	0.018953	0.0887975	6.80938	0	4.26934	8.22673	8.57124	8.3484	207.686	244.543	256.16	211.838	232.376	193.126	2.3459	-1.18256	0.152477	-1.33504	ITFG3	chr16:312740:+	chr16_262753_+
chr12:56811698-56811802:mpeak_19834|chr12_56811570_56843200_TIMELESS_NM_-|	523.46	-1.03462	0.437389	-2.36545	0.0180083	0.0860952	28.9399	38.1106	34.1547	43.1904	26.6661	18.3665	1188.24	1381.51	1749.57	567.645	641.891	563.239	2.34308	0.198057	1.2848	-1.08674	TIMELESS	-	chr12_56417937_-
chr12:56197411-56197519:mpeak_19665|chr12_56146624_56211540_SARNP_NR_-mpeak_19665|chr12_56151337_56211540_SARNP_NM_-||	277.807	-1.08605	0.469862	-2.31143	0.0208093	0.0940908	18.7258	7.41039	16.2235	27.7652	20.9519	20.0362	512.406	683.873	619.054	392.827	584.749	429.665	2.33344	-0.698738	0.367366	-1.0661	SARNP	-	-
chr3:42641493-42641573:mpeak_58621|chr3_42594940_42642572_SEC22C_NM_-|	44.9432	-2.74225	1.34537	-2.03828	0.0415222	0.149724	1.70234	0	0	1.02834	0.95236	7.79184	80.0102	62.459	77.7019	107.976	102.855	96.8415	2.31957	-2.52121	-0.482769	-2.03844	SEC22C	chr3:42641495:-	chr3_42600005_-
chr5:131928822-131928946:mpeak_69923|chr5_131892615_131977869_RAD50_NM_+|	27.4382	-3.35986	1.19467	-2.81238	0.00491763	0.0371105	0	1.05863	0.853867	7.19839	16.1901	8.3484	34.0469	60.3418	29.8854	42.162	59.0463	70.1266	2.3084	-4.05263	-0.463295	-3.58934	RAD50	chr5:131928874:+;chr5:131928943:+	chr5_132593181_+;chr5_132593249_+
chr5:131930547-131930706:mpeak_69926|chr5_131892615_131977869_RAD50_NM_+|	26.4261	-2.6796	1.18754	-2.25643	0.0240437	0.103353	0	1.05863	0.853867	7.19839	5.71416	6.67872	34.0469	60.3418	29.8854	42.162	59.0463	70.1266	2.3084	-3.35668	-0.463295	-2.89339	RAD50	-	chr5_132594888_+
chr5:95998829-95998877:mpeak_69079|chr5_95997740_96108343_CAST_NM_+|	125.942	-1.728	0.776676	-2.22486	0.0260904	0.108682	0	6.35176	3.41547	20.5668	4.7618	20.0362	217.9	271.009	149.427	219.037	290.47	308.334	2.29516	-2.21555	-0.357505	-1.85805	CAST	-	-
chr17:26993491-26993553:mpeak_36612|chr17_26989301_27028456_SUPT6H_NM_+|	201.579	-1.60914	0.640174	-2.51361	0.0119504	0.0667056	17.0234	0	8.53867	11.3118	8.57124	9.46152	413.67	644.704	613.931	209.782	234.281	247.669	2.29284	-0.199084	1.27355	-1.47264	SUPT6H	-	-
chr20:47305235-47305349:mpeak_53940|chr20_47242465_47444420_PREX1_NM_-|	1014.09	-1.12184	0.554827	-2.02196	0.0431808	0.15413	80.0102	48.6969	70.871	82.2673	37.142	32.8371	3387.67	1754.15	3622.11	1007.77	971.407	1074.16	2.27727	0.390545	1.52119	-1.13064	PREX1	-	chr20_48688762_-
chr5:106763976-106764052:mpeak_69305|chr5_106717077_107006596_EFNA5_NM_-|	149.413	-2.05937	0.848595	-2.42681	0.0152324	0.0776503	6.80938	0	0	6.17005	6.66652	5.5656	248.542	305.943	345.816	304.389	278.089	284.959	2.26903	-1.43428	0.0536497	-1.48793	EFNA5	-	-
chr4:41012836-41012903:mpeak_64152|chr4_40818276_41216635_APBB2_NM_-|	141.222	-1.93943	0.839768	-2.30948	0.0209169	0.0944388	0	5.29314	0	13.3684	12.3807	5.00904	251.947	189.494	258.722	365.061	253.328	340.058	2.26796	-2.53877	-0.453008	-2.08577	APBB2	chr4:41012839:-	chr4_41010827_-
chr7:91978271-91978573:mpeak_78820|chr7_91875547_92027525_ANKIB1_NM_+|	69.3285	-2.9367	1.05171	-2.79231	0.00523326	0.0384622	0	2.11725	0.853867	22.6235	21.9043	26.7149	37.4516	118.566	40.9856	171.733	198.091	190.9	2.26224	-4.58366	-1.50907	-3.07459	ANKIB1	-	-
chr2:183819049-183819167:mpeak_50599|chr2_183790546_183903586_NCKAP1_NM_-|	71.203	-2.68458	0.956628	-2.8063	0.00501147	0.0375591	0	3.17588	0	7.19839	8.57124	5.5656	132.783	125.977	163.089	136.769	117.14	154.167	2.25855	-2.74801	0.0478829	-2.79589	NCKAP1	-	-
chr3:176765127-176765191:mpeak_62198|chr3_176743312_176915048_TBL1XR1_NM_-|	226.159	-2.4496	0.626126	-3.91231	9.1416e-05	0.00310657	11.9164	2.11725	0	37.0203	30.4755	33.9502	245.138	375.813	315.077	589.24	503.799	569.361	2.24892	-2.85375	-0.828644	-2.0251	TBL1XR1	-	-
chr10:5933276-5933418:mpeak_9342|chr10_5931534_5979072_FBXO18_NM_+|	158.734	-1.93005	0.554916	-3.47809	0.000504994	0.00876429	5.10703	8.46902	11.1003	26.7369	27.6184	11.6878	333.66	356.757	412.418	186.13	275.232	249.896	2.23754	-1.42028	0.632773	-2.05305	FBXO18	-	chr10_5891362_+
chr16:2806533-2806619:mpeak_31618|chr16_2802329_2820858_SRRM2_NM_+|	692.202	-1.29211	0.586234	-2.20408	0.027519	0.113183	74.9032	40.2278	38.424	33.9353	6.66652	23.9321	2667.57	2449.66	1768.36	398.997	395.229	408.515	2.23009	1.25063	2.51726	-1.26663	SRRM2	-	-
chr11:61127968-61128043:mpeak_14859|chr11_61117894_61129755_CYB561A3_NM_-|	141.234	-1.42854	0.543847	-2.62673	0.0086209	0.0535764	3.40469	10.5863	5.1232	18.5102	13.333	15.0271	233.221	309.119	326.177	256.057	299.993	204.258	2.20078	-1.29403	0.191971	-1.486	CYB561A3	chr11:61127985:-	chr11_61360514_-
chr12:6692410-6692558:mpeak_17761|chr12_6679859_6716599_CHD4_NM_-|	814.609	-1.14016	0.543763	-2.0968	0.0360113	0.135636	85.1172	44.4623	48.6704	37.0203	14.2854	17.2534	3154.45	3095.43	1864.85	402.082	544.75	466.954	2.19663	1.37848	2.52098	-1.14249	CHD4	-	-
chr12:104333283-104333380:mpeak_21232|chr12_104324111_104341410_HSP90B1_NM_+|	955.343	-1.06194	0.420622	-2.52469	0.0115799	0.0655111	39.1539	51.8727	46.1088	91.5224	46.6656	84.0406	2248.8	2125.72	1892.17	1208.3	1979	1650.76	2.18832	-0.696443	0.373274	-1.06972	HSP90B1	chr12:104333404:+	chr12_103939549_+
chr2:153514424-153514549:mpeak_49840|chr2_153512912_153573975_PRPF40A_NM_-|	144.421	-2.16255	0.586549	-3.68691	0.000226994	0.00543826	5.10703	4.23451	2.5616	32.9069	26.6661	38.4027	161.723	222.312	160.527	311.588	388.563	378.461	2.18582	-3.04108	-0.986008	-2.05507	PRPF40A	-	chr2_152657942_-;chr2_152657993_-
chr14:105839188-105839343:mpeak_28258|chr14_105767147_105860890_PACS2_NM_+|	114.492	-3.27803	0.93829	-3.49362	0.000476514	0.00849683	5.10703	0	0	7.19839	11.4283	10.5746	200.877	249.836	253.599	184.073	258.09	193.126	2.17533	-2.51548	0.1488	-2.66428	PACS2	chr14:105839342:+	-
chr3:53163765-53163823:mpeak_59241|chr3_53126086_53164470_RFT1_NM_-|	171.343	-1.02798	0.486438	-2.11327	0.0345776	0.131585	11.9164	5.29314	11.9541	8.22673	14.2854	7.23528	423.884	446.741	470.481	195.385	238.09	222.624	2.1746	-0.028591	1.03144	-1.06003	RFT1	chr3:53163771:-	chr3_53129757_-
chr12:76462698-76462784:mpeak_20594|chr12_76442244_76478813_NAP1L1_NM_-|	626.265	-1.25524	0.429329	-2.92372	0.00345876	0.0295287	34.0469	19.0553	21.3467	88.4374	52.3798	50.647	1161	1340.22	944.377	1159.97	1414.25	1229.44	2.16069	-1.36275	-0.142636	-1.22012	NAP1L1	chr12:76462668:-;chr12:76462701:-	chr12_76068981_-
chr19:55649325-55649436:mpeak_45223|chr19_55644328_55660722_TNNT1_NM_-|	104.358	-1.95019	0.725109	-2.68951	0.00715572	0.0474726	8.51172	0	1.70773	10.2834	3.80944	7.79184	195.77	245.602	270.676	164.535	186.663	156.95	2.15283	-1.0986	0.486726	-1.58533	TNNT1	chr19:55649333:-;chr19:55649367:-;chr19:55649400:-	-
chr9:139757734-139757885:mpeak_88138|chr9_139756948_139760788_EDF1_NM_-|	377.927	-0.84129	0.422508	-1.99118	0.046461	0.161667	20.4281	19.0553	15.3696	33.9353	16.1901	21.1493	771.162	757.977	1021.23	586.155	641.891	630.583	2.15079	-0.377818	0.456465	-0.834284	EDF1	chr9:139757740:-;chr9:139757794:-;chr9:139757838:-	chr9_136863417_-
chr2:15763559-15763712:mpeak_45928|chr2_15731744_15770899_DDX1_NM_+|	78.5391	-1.4434	0.642972	-2.24489	0.0247752	0.105129	3.40469	6.35176	2.5616	8.22673	3.80944	7.23528	165.127	197.963	210.905	92.5508	128.569	115.765	2.14602	-0.645691	0.768789	-1.41448	DDX1	-	chr2_15623533_+
chr15:79183827-79183917:mpeak_30574|chr15_79165122_79189324_MORF4L1_NM_+|	692.164	-0.940313	0.435824	-2.15755	0.0309625	0.123209	45.9633	33.8761	23.0544	53.4738	30.4755	45.6379	1370.39	1628.17	1814.47	842.212	1262.83	1155.42	2.13782	-0.332767	0.561868	-0.894636	MORF4L1	-	chr15_78891490_+;chr15_78891567_+
chr7:141325602-141325657:mpeak_80349|chr7_141251077_141352586_AGK_NM_+|	42.0844	-2.92162	1.26776	-2.30455	0.0211919	0.0951215	0	2.11725	0	3.08503	0.95236	6.12216	69.7961	109.039	118.688	39.077	97.1407	58.9954	2.13489	-2.26257	0.607948	-2.87052	AGK	chr7:141325658:+	chr7_141625852_+
chr8:96044355-96044411:mpeak_82995|chr8_96037213_96070036_NDUFAF6_NM_+|	54.8888	-2.06218	0.979601	-2.10512	0.0352809	0.13342	3.40469	1.05863	0	6.17005	6.66652	2.7828	95.3313	104.804	114.418	97.6925	99.9978	126.339	2.12841	-1.80715	-0.0428189	-1.76433	NDUFAF6	chr8:96044412:+	chr8_95032183_+
chr14:53258052-53258191:mpeak_25975|chr14_53245176_53258386_GNPNAT1_NM_-|	697.813	-1.27745	0.546251	-2.33858	0.0193572	0.0898704	34.0469	19.0553	17.0773	133.684	47.618	57.8823	1014.6	1114.73	1168.94	1627.86	1455.21	1683.04	2.12776	-1.769	-0.5311	-1.2379	GNPNAT1	-	-
chr5:70356690-70356779:mpeak_68429|chr5_70331623_70363497_GTF2H2_NM_-|	46.0501	-3.31214	1.18725	-2.78977	0.00527461	0.0385983	0	2.11725	0	10.2834	1.90472	5.5656	136.188	95.2765	67.4555	87.409	72.3794	74.0225	2.12491	-3.06786	0.354415	-3.42227	GTF2H2	-	chr5_71060916_-
chr5:106967837-106968068:mpeak_69308|chr5_106717077_107006596_EFNA5_NM_-|	149.44	-1.52261	0.756278	-2.01329	0.0440839	0.156553	0	6.35176	0	6.17005	8.57124	4.45248	248.542	305.943	345.816	304.389	278.089	284.959	2.11654	-1.59541	0.0536497	-1.64906	EFNA5	-	chr5_107632121_-;chr5_107632175_-;chr5_107632237_-;chr5_107632274_-
chr15:83520905-83521018:mpeak_30724|chr15_83518655_83621476_HOMER2_NM_-|	46.4697	-2.04833	1.03372	-1.98152	0.0475329	0.164314	1.70234	0	1.70773	6.17005	1.90472	7.79184	49.368	100.57	92.2177	99.7491	92.3789	104.077	2.11233	-2.21812	-0.290663	-1.92745	HOMER2	-	-
chr12:79996473-79996620:mpeak_20683|chr12_79986473_80084790_PAWR_NM_-|	106.93	-1.58726	0.738258	-2.15001	0.0315543	0.124719	3.40469	6.35176	0	6.17005	6.66652	8.3484	214.495	284.771	197.243	174.818	236.185	144.706	2.10115	-1.11861	0.325813	-1.44443	PAWR	-	-
chr3:52702530-52702664:mpeak_59190|chr3_52582251_52719866_PBRM1_NM_-|	98.181	-1.67256	0.651924	-2.56557	0.0103006	0.0606563	3.40469	5.29314	5.97707	14.3968	7.61888	8.90496	219.602	305.943	173.335	110.033	182.853	140.81	2.09977	-1.07522	0.688364	-1.76358	PBRM1	-	-
chr14:21975974-21976029:mpeak_25008|chr14_21966513_21979517_METTL3_NM_-|	53.6899	-2.27808	1.12187	-2.03061	0.0422941	0.151921	1.70234	4.23451	0	2.05668	0.95236	8.90496	190.663	68.8108	165.65	85.3524	71.427	44.5248	2.09475	-1.00489	1.07851	-2.08339	METTL3	chr14:21975979:-	chr14_21507837_-
chr4:187559557-187559611:mpeak_66938|chr4_187510374_187644987_FAT1_NM_-|	86.5096	-2.31465	0.844493	-2.74088	0.00612756	0.0429438	6.80938	4.23451	0	4.11337	3.80944	5.00904	326.85	307.002	157.112	59.6438	96.1884	67.3438	2.09439	-0.22768	1.82543	-2.05311	FAT1	-	-
chr17:35766296-35766371:mpeak_37075|chr17_35444374_35766902_ACACA_NM_-|	97.5849	-3.14581	0.643354	-4.8897	1.00991e-06	0.000158069	6.80938	5.29314	5.1232	19.5385	17.1425	14.4706	352.385	318.647	152.842	93.5791	79.9983	105.19	2.09082	-1.57021	1.56336	-3.13358	ACACA	chr17:35766301:-	chr17_37406212_-
chr3:48481791-48481868:mpeak_58910|chr3_48481685_48485255_TMA7_NM_+|	429.203	-1.09616	0.43012	-2.54849	0.0108192	0.0628048	10.2141	11.6449	18.7851	43.1904	43.8086	52.3167	510.703	627.766	810.32	887.459	1099.02	1035.2	2.0856	-1.77724	-0.632775	-1.14447	TMA7	chr3:48481869:+	chr3_48440410_+;chr3_48440443_+
chr3:160952531-160952649:mpeak_61924|chr3_160939098_160968567_NMD3_NM_+|	252.009	-1.28752	0.642273	-2.00463	0.0450021	0.15835	6.80938	11.6449	1.70773	41.1337	26.6661	27.2715	275.78	457.327	238.229	658.139	765.698	513.705	2.0757	-2.23737	-0.996185	-1.24118	NMD3	-	chr3_161234783_+;chr3_161234849_+
chr17:16052764-16052843:mpeak_36137|chr17_15935797_16118874_NCOR1_NM_-|	98.9451	-2.23296	0.828707	-2.69451	0.00704919	0.0468395	1.70234	3.17588	0	16.4535	17.1425	13.3574	100.438	104.804	147.719	236.519	279.994	266.036	2.07313	-3.2668	-1.14867	-2.11813	NCOR1	-	-
chr11:85340244-85340321:mpeak_16342|chr11_85339616_85347089_TMEM126B_NM_+|	71.8129	-2.36816	1.16288	-2.03645	0.0417048	0.150251	0	2.11725	0	7.19839	10.476	3.33936	97.0337	136.563	74.2865	155.28	205.71	169.751	2.06304	-3.31106	-0.785624	-2.52544	TMEM126B	chr11:85340312:+	chr11_85629271_+
chr16:75338913-75339082:mpeak_34421|chr16_75327940_75467387_CFDP1_NM_-|	91.0444	-3.44999	0.765544	-4.50659	6.58792e-06	0.000561465	0	5.29314	3.41547	39.077	11.4283	15.5837	255.352	214.901	163.089	116.203	125.712	142.479	2.06254	-2.9239	0.7204	-3.6443	CFDP1	-	chr16_75305125_-;chr16_75305156_-
chr2:201943591-201943693:mpeak_51037|chr2_201936461_201950181_NDUFB3_NM_+|	150.094	-2.55095	1.0678	-2.38897	0.0168959	0.0825934	6.80938	0	0	17.4818	2.85708	3.33936	350.683	276.302	363.748	200.527	299.993	279.393	2.06192	-1.79797	0.345181	-2.14315	NDUFB3	-	chr2_201078981_+;chr2_201078995_+
chr5:10285017-10285175:mpeak_67239|chr5_10280744_10308168_CMBL_NM_-|	122.643	-1.42903	0.607053	-2.35405	0.0185702	0.0876844	1.70234	10.5863	3.41547	17.4818	12.3807	9.46152	267.268	304.885	191.266	236.519	195.234	221.511	2.05707	-1.32427	0.22481	-1.54908	CMBL	-	-
chr1:171493948-171494067:mpeak_6646|chr1_171454665_171560725_PRRC2C_NM_+|	195.92	-2.37699	0.812161	-2.92675	0.00342521	0.0293609	8.51172	12.7035	0	22.6235	9.5236	17.2534	517.513	732.57	299.707	230.349	254.28	246	2.05337	-1.21942	1.08486	-2.30429	PRRC2C	-	chr1_171524835_+;chr1_171524903_+
chr12:106752487-106752549:mpeak_21367|chr12_106751435_106903197_POLR3B_NM_+|	76.1859	-2.92806	1.0223	-2.8642	0.00418065	0.0333662	0	4.23451	0	8.22673	4.7618	2.7828	219.602	290.064	111.003	76.0973	109.521	87.9365	2.04675	-1.89704	1.18199	-3.07903	POLR3B	-	-
chr4:143575759-143575813:mpeak_66171|chr4_142950067_143767604_INPP4B_NM_-|	56.9743	-2.59741	0.999035	-2.59992	0.0093245	0.0567391	3.40469	1.05863	0	8.22673	0.95236	10.5746	120.866	113.273	93.0715	117.231	107.617	107.416	2.04607	-2.14594	-0.0221071	-2.12383	INPP4B	-	-
chr3:195009839-195009963:mpeak_62767|chr3_195000157_195163817_ACAP2_NM_-|	47.3794	-2.51913	1.18684	-2.12255	0.0337913	0.130057	0	0	1.70773	9.25508	5.71416	1.66968	86.8196	100.57	63.1862	99.7491	88.5695	111.312	2.04458	-3.28441	-0.257941	-3.02646	ACAP2	-	chr3_195289166_-
chr9:133457050-133457126:mpeak_87733|chr9_133454959_133512400_FUBP3_NM_+|	194.337	-0.925777	0.462507	-2.00165	0.0453223	0.15908	10.2141	10.5863	7.68481	10.2834	8.57124	13.3574	456.228	495.438	444.011	259.142	294.279	322.248	2.04096	-0.177393	0.672506	-0.849899	FUBP3	chr9:133457108:+	chr9_130581739_+
chr17:7588565-7588633:mpeak_35818|chr17_7573008_7590868_TP53_NM_-|	218.54	-1.79932	0.584085	-3.08057	0.00206602	0.0213293	5.10703	12.7035	15.3696	13.3684	19.9996	32.2805	447.717	440.389	738.595	276.624	261.899	358.425	2.03972	-0.984441	0.858853	-1.84329	TP53	chr17:7588533:-;chr17:7588567:-	chr17_7685235_-
chr19:6381374-6381631:mpeak_42030|chr19_6380496_6393291_GTF2F1_NM_-|	103.222	-2.0009	0.708659	-2.8235	0.00475018	0.0364655	11.9164	2.11725	1.70773	13.3684	3.80944	10.5746	236.626	217.019	322.762	151.166	145.711	121.887	2.02747	-0.818055	0.890675	-1.70873	GTF2F1	-	chr19_6381417_-
chr7:106814881-106815076:mpeak_79498|chr7_106809405_106841858_HBP1_NM_+|	37.5528	-3.00309	1.00235	-2.99605	0.00273503	0.0253547	1.70234	0	1.70773	9.25508	1.90472	7.23528	71.4985	87.8661	93.0715	48.3321	59.0463	69.0135	2.0263	-2.43144	0.517134	-2.94858	HBP1	-	chr7_107174586_+
chr9:139304537-139304598:mpeak_88068|chr9_139297339_139305054_SDCCAG3_NM_-|	97.3144	-1.93112	0.814849	-2.36991	0.0177925	0.0856186	0	0	4.26934	9.25508	3.80944	4.45248	212.793	188.436	233.96	146.025	179.996	184.778	2.01641	-2.03667	0.31443	-2.3511	SDCCAG3	-	-
chr15:65421401-65421511:mpeak_29965|chr15_65411178_65426174_PDCD7_NM_-|	112.684	-1.47884	0.723934	-2.04278	0.0410739	0.148615	5.10703	6.35176	0	5.14171	5.71416	5.00904	279.185	217.019	356.917	144.996	180.948	145.819	2.01475	-0.469384	0.854685	-1.32407	PDCD7	chr15:65421445:-	chr15_65129105_-
chr21:46195644-46195846:mpeak_55693|chr21_46191404_46221751_UBE2G2_NM_-|	183.127	-1.38417	0.571773	-2.42084	0.0154846	0.0783687	6.80938	9.52765	7.68481	11.3118	14.2854	22.2624	434.098	255.129	506.343	310.559	316.184	303.325	2.00924	-0.994461	0.362291	-1.35675	UBE2G2	-	chr21_44775881_-
chr21:40717084-40717328:mpeak_55408|chr21_40715085_40721047_HMGN1_NM_-|	1210.1	-1.12226	0.469483	-2.39042	0.016829	0.082553	69.7961	45.521	38.424	139.854	59.9987	76.8053	2740.78	2218.88	2704.2	1833.53	2399.95	2193.4	2.00605	-0.847603	0.253951	-1.10155	HMGN1	-	chr21_39345239_-
chr2:15735632-15735682:mpeak_45923|chr2_15731744_15770899_DDX1_NM_+|	77.754	-1.79126	0.808101	-2.21663	0.0266482	0.110515	5.10703	0	2.5616	9.25508	1.90472	3.33936	165.127	197.963	210.905	92.5508	128.569	115.765	2.00401	-0.918927	0.768789	-1.68772	DDX1	-	-
chrX:38661760-38661881:mpeak_88801|chrX_38660684_38663935_MID1IP1_NM_+|	76.3657	-2.55149	0.980818	-2.60139	0.00928467	0.0565782	0	3.17588	0	5.14171	4.7618	6.67872	158.318	130.211	189.559	123.401	170.472	124.67	1.99287	-2.38441	0.1919	-2.57631	MID1IP1	-	chrX_38802557_+
chr8:126085511-126085641:mpeak_83943|chr8_126036915_126104061_KIAA0196_NM_-|	38.4885	-3.73803	1.44798	-2.58155	0.0098357	0.0589166	1.70234	0	0	0	7.61888	4.45248	112.355	105.863	39.2779	49.3604	73.3317	67.9004	1.98335	-2.82599	0.434055	-3.26005	KIAA0196	-	-
chr12:133131029-133131084:mpeak_22688|chr12_133067156_133159556_FBRSL1_NM_+|	110.875	-1.23239	0.588238	-2.09504	0.036167	0.136041	3.40469	8.46902	3.41547	8.22673	4.7618	10.5746	284.292	228.664	259.576	194.357	146.663	178.099	1.9791	-0.624023	0.573526	-1.19755	FBRSL1	chr12:133131082:+	chr12_132554493_+
chr13:79216253-79216323:mpeak_24308|chr13_79191257_79233314_RNF219_NM_-|	32.2169	-2.96947	1.35287	-2.19494	0.0281677	0.114909	0	0	0.853867	7.19839	2.85708	7.23528	32.3446	31.7588	65.7478	64.7855	78.0935	95.7284	1.97272	-4.33985	-0.87778	-3.46207	RNF219	-	-
chr2:65569113-65569163:mpeak_47501|chr2_65541303_65659656_SPRED2_NM_-|	32.5332	-3.49648	1.42997	-2.44515	0.0144793	0.0754031	0	1.05863	0	2.05668	1.90472	12.8009	59.5821	66.6935	35.0086	76.0973	69.5223	65.6741	1.96912	-3.98495	-0.389645	-3.59531	SPRED2	chr2:65569111:-	chr2_65341978_-
chr3:132383513-132383573:mpeak_60966|chr3_132373289_132395286_UBA5_NM_+|	80.667	-1.79003	0.865344	-2.06857	0.0385864	0.142852	1.70234	4.23451	0	9.25508	9.5236	3.33936	148.104	197.963	108.441	151.166	162.854	171.421	1.95932	-1.89745	-0.0949869	-1.80247	UBA5	-	-
chr19:33954879-33954970:mpeak_43471|chr19_33878387_34012799_PEPD_NM_-|	89.1228	-1.96795	0.813639	-2.4187	0.0155761	0.0786409	5.10703	0	4.26934	3.08503	2.85708	8.3484	245.138	174.674	303.977	79.1823	120.95	121.887	1.94319	-0.607956	1.16842	-1.77638	PEPD	-	-
chr20:47900106-47900232:mpeak_54035|chr20_47894714_47905581_ZFAS1_NR_+|	295.486	-1.48163	0.533782	-2.77572	0.00550793	0.0398947	6.80938	11.6449	9.39254	37.0203	22.8566	48.4207	486.871	390.633	557.575	485.377	722.841	766.383	1.94044	-1.95942	-0.460431	-1.49899	ZFAS1	-	chr20_49283691_+
chr16:89336176-89336234:mpeak_34986|chr16_89335071_89556969_ANKRD11_NM_-|	47.9071	-3.15613	1.3197	-2.39154	0.0167777	0.082445	1.70234	0	0	6.17005	0	5.5656	71.4985	101.628	92.2177	83.2957	107.617	105.19	1.92468	-2.7853	-0.158229	-2.62707	ANKRD11	-	-
chr4:107238092-107238274:mpeak_65527|chr4_107236766_107268682_AIMP1_NM_+|	68.951	-2.92087	0.972258	-3.00421	0.00266269	0.0249779	1.70234	2.11725	0	11.3118	8.57124	20.0362	88.5219	123.859	85.3867	133.684	175.234	176.986	1.92411	-3.38559	-0.706485	-2.6791	AIMP1	-	chr4_106317061_+
chr1:115263151-115263345:mpeak_4407|chr1_115260837_115300671_CSDE1_NM_-|	10889	-0.789808	0.3343	-2.36257	0.0181486	0.0864178	371.111	301.709	268.114	1110.61	697.128	783.637	17123.9	15578.8	16236.3	28435.7	20998.6	28762.5	1.92267	-1.46155	-0.676126	-0.785425	CSDE1	chr1:115263225:-;chr1:115263294:-	chr1_114720705_-
chr7:128125840-128125898:mpeak_79879|chr7_128116782_128141815_METTL2B_NM_+|	61.363	-1.91832	0.785797	-2.44124	0.0146369	0.0760365	0	2.11725	2.5616	7.19839	5.71416	6.67872	108.95	120.684	135.765	125.458	110.474	110.755	1.92072	-2.06598	0.0758372	-2.14182	METTL2B	chr7:128125897:+	chr7_128485842_+
chr5:148876899-148877070:mpeak_70795|chr5_148876423_148931115_CSNK1A1_NM_-|	158.072	-1.51918	0.756333	-2.00862	0.0445776	0.157476	0	6.35176	0	5.14171	2.85708	7.79184	303.017	357.816	333.862	266.341	327.612	286.072	1.91569	-1.31384	0.176712	-1.49055	CSNK1A1	chr5:148876883:-;chr5:148876998:-	chr5_149497457_-
chr10:134540767-134540859:mpeak_13284|chr10_134351352_134595540_INPP5A_NM_+|	146.094	-1.78317	0.565882	-3.15113	0.00162643	0.0182074	0	6.35176	3.41547	18.5102	15.2378	13.3574	263.863	247.719	255.306	292.049	316.184	321.135	1.91043	-2.26987	-0.277233	-1.99264	INPP5A	chr10:134540818:+;chr10:134540853:+	-
chr9:91954819-91954876:mpeak_85988|chr9_91933387_91973635_SECISBP2_NM_+|	80.5773	-1.81553	0.773945	-2.34581	0.0189859	0.0889026	1.70234	3.17588	2.5616	18.5102	6.66652	12.2443	146.402	156.677	87.9483	135.741	183.806	211.493	1.90264	-2.33051	-0.441552	-1.88896	SECISBP2	chr9:91954876:+	chr9_89339953_+
chr12:124074896-124075005:mpeak_22451|chr12_124069075_124081151_TMED2_NM_+|	236.32	-1.77036	0.471148	-3.75754	0.000171594	0.00460416	5.10703	12.7035	11.1003	40.1053	16.1901	26.7149	500.489	486.969	534.521	364.033	410.467	427.438	1.89956	-1.52168	0.340585	-1.86227	TMED2	chr12:124074988:+	chr12_123590396_+
chr17:27837886-27838019:mpeak_36718|chr17_27717942_27869578_TAOK1_NM_+|	251.905	-2.50885	0.88657	-2.82984	0.00465716	0.0359473	10.2141	1.05863	0	52.4454	14.2854	45.0814	303.017	356.757	230.544	779.483	534.274	695.7	1.89921	-3.31017	-1.17441	-2.13576	TAOK1	-	-
chr8:42384499-42384616:mpeak_81876|chr8_42275485_42397356_SLC20A2_NM_-|	25.7337	-3.83999	1.35333	-2.83744	0.00454771	0.0354822	0	1.05863	0	6.17005	3.80944	3.89592	68.0938	49.7555	49.5243	25.7085	59.0463	41.742	1.89748	-3.71226	0.40397	-4.11623	SLC20A2	chr8:42384498:-;chr8:42384565:-	chr8_42529398_-
chr12:50398861-50398988:mpeak_19173|chr12_50384126_50419307_RACGAP1_NM_-|	106.99	-2.10528	0.640645	-3.28619	0.00101552	0.0136362	3.40469	9.52765	3.41547	9.25508	14.2854	7.79184	289.399	225.488	350.939	93.5791	157.139	119.66	1.88812	-0.938555	1.22507	-2.16363	RACGAP1	-	-
chr12:27790202-27790279:mpeak_18439|chr12_27677044_27845728_PPFIBP1_NM_+|	116.691	-2.22783	0.589405	-3.7798	0.000156956	0.0043162	3.40469	5.29314	7.68481	12.3401	12.3807	18.3665	270.673	328.174	271.53	113.118	207.615	149.715	1.88225	-1.39509	0.887609	-2.2827	PPFIBP1	chr12:27790291:+	-
chr3:25650790-25650844:mpeak_58143|chr3_25639968_25705863_TOP2B_NM_-|	222.439	-1.67014	0.748568	-2.23111	0.0256738	0.107636	18.7258	2.11725	3.41547	32.9069	12.3807	22.2624	439.205	534.607	315.077	323.928	454.276	510.366	1.88213	-1.47746	0.000357849	-1.47782	TOP2B	-	-
chr5:56180484-56180558:mpeak_68004|chr5_56110899_56189357_MAP3K1_NM_+|	210.428	-1.95226	0.590429	-3.30652	0.000944639	0.0130136	11.9164	15.8794	0.853867	19.5385	19.0472	22.819	515.811	597.066	413.272	334.211	284.756	289.968	1.87725	-1.09983	0.747647	-1.84748	MAP3K1	-	chr5_56884716_+
chr16:27694324-27694380:mpeak_32815|chr16_27561467_27789894_KIAA0556_NM_+|	32.0075	-4.67668	0.989333	-4.7271	2.2775e-06	0.000274992	1.70234	0	1.70773	11.3118	7.61888	7.23528	80.0102	106.921	86.2406	19.5385	29.5232	32.2805	1.87249	-2.93981	1.74774	-4.68755	KIAA0556	chr16:27694376:+	chr16_27683054_+
chr3:160138583-160138702:mpeak_61848|chr3_160117091_160151444_SMC4_NM_+|	161.448	-2.49337	0.84274	-2.95865	0.0030899	0.0275485	0	6.35176	3.41547	48.3321	7.61888	26.1583	257.054	329.233	198.951	311.588	381.896	366.773	1.86578	-3.07152	-0.433212	-2.63831	SMC4	-	-
chr14:45587026-45587320:mpeak_25686|chr14_45585455_45603732_FKBP3_NM_-|	320.746	-1.3622	0.675654	-2.01612	0.0437875	0.155632	10.2141	0	9.39254	19.5385	23.809	23.9321	466.443	777.032	333.862	664.309	838.077	682.343	1.86453	-1.77883	-0.469963	-1.30887	FKBP3	chr14:45587024:-;chr14:45587187:-	chr14_45117823_-
chr4:54244492-54244622:mpeak_64359|chr4_54243819_54325468_FIP1L1_NM_+|	104.708	-2.19271	0.64391	-3.4053	0.000660911	0.0103012	8.51172	1.05863	5.1232	17.4818	6.66652	9.46152	268.97	299.592	221.152	117.231	134.283	166.968	1.86062	-1.1937	0.916165	-2.10987	FIP1L1	chr4:54244548:+	chr4_53378379_+
chr2:62115052-62115141:mpeak_47379|chr2_62095841_62115806_CCT4_NM_-|	1211.21	-1.92822	0.349921	-5.51044	3.57936e-08	1.51264e-05	57.8797	52.9314	70.871	73.0123	100.95	128.009	3093.16	3101.78	3575.14	1252.52	1628.54	1399.75	1.85958	-0.732995	1.19049	-1.92348	CCT4	chr2:62115011:-;chr2:62115073:-	chr2_61887940_-
chr1:202883544-202883714:mpeak_7604|chr1_202861787_202897772_KLHL12_NM_-|	176.239	-1.04306	0.520125	-2.00539	0.044921	0.158131	8.51172	11.6449	4.26934	12.3401	5.71416	9.46152	446.014	372.637	498.659	251.944	257.137	236.538	1.85423	-0.171844	0.821084	-0.992928	KLHL12	chr1:202883556:-;chr1:202883628:-;chr1:202883659:-	chr1_202914430_-;chr1_202914502_-
chr16:84522790-84522840:mpeak_34691|chr16_84513632_84538288_TLDC1_NM_-|	87.8928	-1.72304	0.800875	-2.15145	0.0314408	0.124467	5.10703	3.17588	0	4.11337	7.61888	1.66968	229.817	192.67	247.622	122.373	111.426	129.122	1.85408	-0.69423	0.88474	-1.57897	TLDC1	chr16:84522786:-	chr16_84489182_-
chr3:101293034-101293134:mpeak_60005|chr3_101293041_101311470_PCNP_NM_+|	174.828	-1.9929	0.736482	-2.70597	0.00681055	0.0458302	8.51172	2.11725	0.853867	46.2754	13.333	23.9321	202.579	208.55	210.051	439.102	492.37	450.257	1.84855	-2.863	-1.15339	-1.7096	PCNP	-	-
chr11:1973394-1973444:mpeak_13461|chr11_1968501_1977485_MRPL23_NM_+|	70.3228	-1.94681	0.932021	-2.08881	0.0367252	0.137467	3.40469	2.11725	0	6.17005	1.90472	6.12216	134.485	163.029	151.135	83.2957	164.758	127.452	1.84619	-1.36233	0.256748	-1.61908	MRPL23	-	-
chr17:57780390-57780444:mpeak_38497|chr17_57775339_57784959_PTRH2_NM_-|	201.937	-3.44568	0.583689	-5.90328	3.56338e-09	2.67092e-06	8.51172	6.35176	0	29.8219	47.618	44.5248	442.61	341.937	423.518	335.239	332.374	410.741	1.84553	-3.03662	0.163866	-3.20049	PTRH2	-	-
chr1:9634806-9634885:mpeak_416|chr1_9599527_9642356_SLC25A33_NM_+|	44.9081	-3.80972	0.958091	-3.97637	6.99753e-05	0.00271299	1.70234	2.11725	0	10.2834	8.57124	10.5746	132.783	96.3351	81.9713	68.8989	66.6652	58.9954	1.84172	-2.94576	0.677117	-3.62288	SLC25A33	-	chr1_9574807_+
chr21:44475166-44475223:mpeak_55560|chr21_44474093_44496472_CBS_NM_-|	151.042	-1.31101	0.615605	-2.12963	0.0332019	0.128726	11.9164	5.29314	4.26934	7.19839	7.61888	9.46152	306.422	320.764	540.498	179.96	207.615	211.493	1.83944	-0.176778	0.96286	-1.13964	CBS	chr21:44475167:-	-
chr2:58387232-58387284:mpeak_47254|chr2_58386935_58468515_FANCL_NM_-|	57.1961	-2.35023	1.03184	-2.27771	0.0227437	0.0996527	1.70234	2.11725	0	8.22673	0.95236	9.46152	124.271	113.273	74.2865	107.976	133.33	110.755	1.83734	-2.28696	-0.175065	-2.11189	FANCL	-	-
chr15:89836163-89836295:mpeak_30887|chr15_89787193_89859627_FANCI_NM_+|	131.467	-1.3776	0.556982	-2.47333	0.0133859	0.0714705	3.40469	12.7035	3.41547	11.3118	5.71416	6.67872	389.837	328.174	344.962	158.365	166.663	146.375	1.8367	-0.279944	1.17307	-1.45302	FANCI	chr15:89836242:+	-
chr6:170874193-170874317:mpeak_76533|chr6_170863420_170881273_TBP_NM_+|	62.212	-1.45563	0.717525	-2.02868	0.0424909	0.152466	1.70234	2.11725	4.26934	4.11337	3.80944	6.67872	139.592	173.615	128.08	87.409	106.664	88.4931	1.83303	-0.852098	0.643128	-1.49523	TBP	chr6:170874262:+;chr6:170874321:+	chr6_170565175_+
chr22:33759273-33759330:mpeak_56679|chr22_33670610_34316416_LARGE_NM_-|	50.8489	-2.46041	0.990046	-2.48515	0.0129498	0.0702761	3.40469	1.05863	0	4.11337	1.90472	5.00904	115.759	116.449	134.057	65.8139	75.2365	87.38	1.8279	-1.30487	0.681136	-1.98601	LARGE	chr22:33759272:-	-
chr16:53279503-53279624:mpeak_33483|chr16_53088944_53357931_CHD9_NM_+|	34.2107	-3.43438	1.39448	-2.46284	0.0137843	0.0729066	0	0	0.853867	10.2834	1.90472	10.5746	25.5352	73.0453	41.8395	89.4657	88.5695	68.4569	1.82424	-4.73652	-0.811794	-3.92473	CHD9	-	-
chr11:62581429-62581537:mpeak_15068|chr11_62575138_62599563_STX5_NM_-|	43.6233	-3.93987	1.36638	-2.88344	0.00393354	0.0320291	1.70234	0	0	6.17005	7.61888	2.22624	73.2008	138.68	70.0171	85.3524	82.8553	55.656	1.81166	-3.23384	0.332553	-3.5664	STX5	chr11:62581455:-	chr11_62813986_-
chr14:35465878-35465984:mpeak_25474|chr14_35452103_35498266_SRP54_NM_+|	141.923	-1.92613	0.854482	-2.25415	0.0241869	0.103718	10.2141	1.05863	3.41547	29.8219	5.71416	15.0271	262.161	372.637	180.166	208.753	358.087	256.018	1.80231	-1.78343	-0.0139081	-1.76953	SRP54	-	-
chr1:23409592-23409669:mpeak_1037|chr1_23345940_23409671_KDM1A_NM_+|	75.7855	-2.62615	0.770893	-3.40663	0.00065769	0.010275	5.10703	2.11725	5.1232	10.2834	9.5236	2.22624	226.412	174.674	286.046	81.239	57.1416	49.5339	1.79696	-0.835465	1.87051	-2.70597	KDM1A	chr1:23409643:+;chr1:23409668:+	chr1_23083150_+
chr17:27209340-27209393:mpeak_36660|chr17_27207617_27224715_FLOT2_NM_-|	104.635	-1.72105	0.832925	-2.06628	0.0388024	0.143151	6.80938	0	1.70773	4.11337	2.85708	8.3484	154.913	276.302	280.922	173.79	179.996	165.855	1.79399	-0.846871	0.454641	-1.30151	FLOT2	chr17:27209354:-	-
chr10:75237862-75237974:mpeak_11208|chr10_75198178_75255782_PPP3CB_NM_-|	55.3747	-2.05073	0.821729	-2.49563	0.0125734	0.0691413	1.70234	3.17588	0.853867	5.14171	9.5236	7.79184	74.9032	133.387	111.857	95.6358	104.76	115.765	1.79046	-1.97004	0.0180793	-1.98812	PPP3CB	chr10:75237869:-;chr10:75237916:-	chr10_73478112_-;chr10_73478159_-
chr7:99498041-99498233:mpeak_79088|chr7_99490369_99517223_TRIM4_NM_-|	22.5123	-5.38534	1.48162	-3.63477	0.000278226	0.00615842	0	1.05863	0	2.05668	7.61888	10.0181	62.9868	21.1725	94.7793	18.5102	28.5708	23.3755	1.77484	-4.21746	1.34466	-5.56212	TRIM4	chr7:99498138:-	chr7_99900501_-;chr7_99900537_-;chr7_99900586_-
chr1:230398308-230398358:mpeak_8651|chr1_230193535_230415048_GALNT2_NM_+|	73.9708	-2.17399	0.83495	-2.60374	0.0092214	0.0563615	5.10703	2.11725	4.26934	2.05668	1.90472	10.5746	265.566	143.973	241.644	66.8422	85.7124	57.8823	1.76504	-0.338801	1.62968	-1.96848	GALNT2	-	-
chr12:120536829-120536903:mpeak_22027|chr12_120535177_120554643_RAB35_NM_-|	232.173	-1.42638	0.717274	-1.98862	0.0467435	0.162516	23.8328	2.11725	4.26934	13.3684	11.4283	16.1402	580.5	403.337	732.618	311.588	345.707	341.171	1.76057	-0.43793	0.781647	-1.21958	RAB35	-	-
chr6:53785468-53785629:mpeak_73980|chr6_53659777_53787432_LRRC1_NM_+|	94.2798	-1.75047	0.626612	-2.79355	0.00521328	0.0383821	3.40469	3.17588	4.26934	9.25508	8.57124	10.5746	212.793	211.725	192.12	120.316	180.948	174.203	1.75952	-1.38826	0.375078	-1.76333	LRRC1	-	-
chr11:114318319-114318373:mpeak_16917|chr11_114310107_114320567_REXO2_NM_+|	58.4307	-3.21161	1.12678	-2.85025	0.00436843	0.03441	0	2.11725	0	4.11337	4.7618	8.3484	117.462	149.266	94.7793	104.891	108.569	106.86	1.75702	-3.02412	0.174514	-3.19863	REXO2	-	-
chr12:113380028-113380104:mpeak_21756|chr12_113376237_113407766_OAS3_NM_+|	118.123	-2.79338	0.749079	-3.72909	0.00019217	0.00502856	0	0	5.97707	5.14171	10.476	3.89592	355.79	327.116	344.962	111.061	142.854	110.199	1.74451	-1.70697	1.49719	-3.20416	OAS3	chr12:113380108:+	chr12_112942263_+
chr4:3202729-3202817:mpeak_63390|chr4_3076236_3241572_HTT_NM_+|	262.93	-1.13246	0.57548	-1.96786	0.0490846	0.168097	20.4281	5.29314	18.7851	9.25508	7.61888	3.89592	817.126	772.798	974.263	146.025	203.805	175.873	1.73569	1.09952	2.28618	-1.18666	HTT	chr4:3202806:+	chr4_3201078_+
chr22:34143359-34143495:mpeak_56687|chr22_33670610_34316416_LARGE_NM_-|	50.963	-3.29718	1.13337	-2.90917	0.00362385	0.0303576	0	2.11725	0	7.19839	4.7618	2.7828	115.759	116.449	134.057	65.8139	75.2365	87.38	1.7342	-2.79976	0.681136	-3.4809	LARGE	-	-
chr13:28224338-28224456:mpeak_23195|chr13_28194879_28239822_POLR1D_NM_+|	110.711	-1.90461	0.863274	-2.20627	0.0273652	0.11266	1.70234	0	4.26934	12.3401	14.2854	10.0181	146.402	103.745	266.407	185.102	287.613	296.647	1.73409	-2.61735	-0.574742	-2.04261	POLR1D	chr13:28224392:+;chr13:28224462:+	chr13_27650254_+;chr13_27650308_+
chrX:149904837-149904896:mpeak_90545|chrX_149861836_149932984_MTMR1_NM_+|	99.2177	-1.52979	0.6589	-2.32173	0.0202476	0.0928052	1.70234	4.23451	5.97707	7.19839	15.2378	4.45248	248.542	195.846	243.352	130.599	167.615	165.855	1.73233	-1.17435	0.567523	-1.74187	MTMR1	chrX:149904893:+	chrX_150736424_+
chr20:61566618-61566717:mpeak_54687|chr20_61513766_61569304_DIDO1_NM_-|	67.3322	-4.30761	1.25041	-3.44497	0.00057112	0.00947583	3.40469	0	0	4.11337	1.90472	8.3484	297.91	186.318	107.587	79.1823	68.5699	50.647	1.72589	-2.07711	1.57674	-3.65385	DIDO1	-	-
chr6:170108769-170108900:mpeak_76482|chr6_170104184_170124106_PHF10_NM_-|	85.8086	-3.66465	1.10405	-3.31927	0.000902534	0.0127016	3.40469	0	0	4.11337	5.71416	8.90496	199.174	171.498	222.006	127.514	157.139	130.235	1.72338	-2.45995	0.514522	-2.97447	PHF10	-	-
chr17:34154289-34154408:mpeak_36998|chr17_34136458_34173909_TAF15_NM_+|	262.089	-2.80233	0.951692	-2.94457	0.003234	0.0284135	0	10.5863	0	4.11337	27.6184	19.4796	585.607	625.649	636.985	404.138	419.038	411.855	1.71833	-2.27427	0.581605	-2.85588	TAF15	-	-
chr7:151038889-151038942:mpeak_80615|chr7_151038846_151074132_NUB1_NM_+|	47.6257	-3.57482	1.34545	-2.65696	0.00788481	0.0504907	1.70234	0	0	2.05668	3.80944	6.12216	59.5821	117.508	120.395	68.8989	99.0455	92.389	1.71674	-2.81603	0.192457	-3.00849	NUB1	-	-
chr17:73037943-73038028:mpeak_39430|chr17_73028661_73059112_KCTD2_NR_+|	160.365	-1.68964	0.626795	-2.69569	0.00702432	0.0467347	3.40469	3.17588	10.2464	15.4251	10.476	23.9321	274.078	369.461	348.378	231.377	376.182	258.244	1.69641	-1.56633	0.196179	-1.76251	KCTD2	-	-
chr9:124914518-124914681:mpeak_87135|chr9_124906657_124922098_NDUFA8_NM_-|	214.537	-2.53753	1.01636	-2.49669	0.0125359	0.0690702	8.51172	0	0	17.4818	5.71416	2.7828	485.168	424.51	599.415	288.964	349.516	392.375	1.69209	-1.60981	0.54984	-2.15965	NDUFA8	-	chr9_122152310_-;chr9_122152401_-
chr1:171759915-171760066:mpeak_6668|chr1_171750760_171765621_METTL13_NM_+|	137.097	-1.60675	0.583553	-2.75338	0.00589828	0.0417892	10.2141	6.35176	1.70773	4.11337	7.61888	10.0181	331.957	389.575	367.163	157.336	190.472	168.638	1.67848	-0.251279	1.07591	-1.32719	METTL13	chr1:171759962:+;chr1:171760063:+;chr1:171760114:+	chr1_171790796_+;chr1_171790824_+;chr1_171790924_+;chr1_171790972_+
chr14:73414652-73414708:mpeak_26888|chr14_73393039_73425319_DCAF4_NM_+|	49.9585	-3.56205	1.33622	-2.66577	0.00768119	0.0498246	1.70234	0	0	8.22673	4.7618	1.66968	74.9032	96.3351	133.203	83.2957	101.903	93.5021	1.67751	-3.10611	0.127451	-3.23356	DCAF4	chr14:73414707:+	chr14_72947996_+
chr3:183718446-183718579:mpeak_62423|chr3_183639189_183735727_ABCC5_NM_-|	307.276	-2.16915	0.521638	-4.15834	3.20572e-05	0.00158449	11.9164	15.8794	17.0773	17.4818	30.4755	20.5927	663.915	949.589	1071.6	199.498	331.421	357.868	1.67119	-0.611305	1.59507	-2.20637	ABCC5	chr3:183718451:-	chr3_184000664_-;chr3_184000741_-
chr4:40596595-40596692:mpeak_64111|chr4_40428160_40631883_RBM47_NM_-|	157.908	-1.6189	0.600551	-2.6957	0.00702419	0.0467347	0	3.17588	8.53867	16.4535	6.66652	10.0181	331.957	411.806	309.1	257.085	265.708	274.384	1.66896	-1.50019	0.401344	-1.90153	RBM47	-	-
chr1:202920054-202920239:mpeak_7609|chr1_202910829_202927700_ADIPOR1_NM_-|	98.205	-1.48199	0.691902	-2.14191	0.0322008	0.12641	3.40469	5.29314	1.70773	10.2834	5.71416	7.79184	282.589	173.615	167.358	165.563	187.615	167.525	1.66873	-1.19297	0.260074	-1.45304	ADIPOR1	-	-
chr6:53787065-53787144:mpeak_73981|chr6_53659777_53787432_LRRC1_NM_+|	93.1473	-1.57716	0.742498	-2.12413	0.0336596	0.129668	0	4.23451	2.5616	9.25508	5.71416	3.89592	212.793	211.725	192.12	120.316	180.948	174.203	1.65318	-1.47294	0.375078	-1.84802	LRRC1	chr6:53787143:+	chr6_53922345_+
chr4:187536929-187536989:mpeak_66931|chr4_187510374_187644987_FAT1_NM_-|	86.7314	-2.649	0.832903	-3.18044	0.00147052	0.0169919	0	5.29314	3.41547	4.11337	10.476	3.33936	326.85	307.002	157.112	59.6438	96.1884	67.3438	1.65152	-1.04176	1.82543	-2.86719	FAT1	-	-
chr7:148824299-148824409:mpeak_80512|chr7_148823507_148875739_ZNF398_NM_+|	32.2385	-3.76371	1.32088	-2.8494	0.00438019	0.0344385	0	0	0.853867	11.3118	4.7618	6.67872	40.8563	70.928	43.5472	80.2107	74.2841	53.4298	1.64912	-4.73586	-0.420709	-4.31515	ZNF398	-	chr7_149127319_+;chr7_149127336_+
chr14:103474821-103474905:mpeak_28085|chr14_103400180_103523742_CDC42BPB_NM_-|	121.771	-1.8509	0.617209	-2.99881	0.00271034	0.0252566	3.40469	0	6.83094	9.25508	4.7618	7.23528	325.148	295.357	311.662	167.62	161.901	168.081	1.64707	-1.05401	0.905595	-1.9596	CDC42BPB	-	-
chr22:41556677-41556736:mpeak_57011|chr22_41488613_41572776_EP300_NM_+|	53.5599	-2.28232	0.9024	-2.52917	0.0114332	0.0651171	1.70234	2.11725	2.5616	9.25508	0.95236	8.3484	129.378	181.025	77.7019	85.3524	78.0935	66.2307	1.64419	-1.53997	0.756845	-2.29682	EP300	-	-
chr10:32317372-32317507:mpeak_10163|chr10_32300444_32345371_KIF5B_NM_-|	317.944	-1.79901	0.803815	-2.23809	0.025215	0.106293	11.9164	0	1.70773	40.1053	11.4283	24.4887	386.432	497.555	363.748	682.819	964.741	830.388	1.63787	-2.48026	-0.989835	-1.49042	KIF5B	-	chr10_32028466_-
chr2:159948258-159948317:mpeak_49924|chr2_159825145_160086088_TANC1_NM_+|	57.6344	-3.20762	0.866905	-3.70009	0.000215527	0.00529544	0	4.23451	1.70773	7.19839	6.66652	1.66968	211.091	200.081	133.203	37.0203	38.0944	50.647	1.63736	-1.3864	2.11391	-3.50031	TANC1	chr2:159948315:+	chr2_159091803_+
chr10:95220033-95220086:mpeak_11835|chr10_95066758_95242074_MYOF_NM_-|	52.3457	-2.56472	0.971021	-2.64126	0.00825973	0.0521369	1.70234	5.29314	0.853867	3.08503	3.80944	5.00904	209.388	201.139	70.871	35.992	60.9511	30.0543	1.63053	-0.600742	1.92243	-2.52318	MYOF	-	-
chr14:24453195-24453525:mpeak_25153|chr14_24439082_24475094_DHRS4L2_NM_+|	121.667	-3.51898	0.560152	-6.2822	3.33819e-10	3.5268e-07	3.40469	5.29314	1.70773	39.077	37.142	45.6379	209.388	207.491	223.713	220.065	233.328	233.755	1.62436	-3.54976	-0.101215	-3.44855	DHRS4L2	chr14:24453294:+;chr14:24453326:+;chr14:24453463:+;chr14:24453527:+	chr14_23984081_+;chr14_23984116_+;chr14_23984349_+
chr17:2030931-2031079:mpeak_35339|chr17_1964916_2207069_SMG6_NM_-|	92.3205	-2.3817	0.81869	-2.90915	0.00362409	0.0303576	3.40469	6.35176	1.70773	21.5952	1.90472	7.23528	216.198	261.481	228.836	112.089	125.712	121.33	1.62264	-1.42276	0.976211	-2.39897	SMG6	-	chr17_2127610_-
chr17:49098513-49098680:mpeak_38080|chr17_49043748_49198226_SPAG9_NM_-|	75.0145	-2.51522	0.938892	-2.67892	0.00738592	0.0485461	5.10703	1.05863	1.70773	12.3401	1.90472	15.5837	137.89	239.25	108.441	97.6925	149.521	129.679	1.62144	-1.92163	0.365562	-2.2872	SPAG9	-	-
chr19:39943977-39944169:mpeak_43911|chr19_39936185_39966895_SUPT5H_NM_+|	494.92	-1.78378	0.595397	-2.99596	0.00273586	0.0253547	11.9164	16.938	35.8624	53.4738	29.5232	20.5927	1053.75	1167.67	1782.88	568.673	622.844	574.927	1.61619	-0.678666	1.1807	-1.85937	SUPT5H	-	-
chr9:140624363-140624431:mpeak_88239|chr9_140513443_140729224_EHMT1_NM_+|	114.217	-2.23576	0.849038	-2.63328	0.0084564	0.0529041	5.10703	6.35176	0	3.08503	0.95236	7.79184	400.051	233.957	429.495	95.6358	95.236	92.9456	1.61619	-0.0459002	1.90579	-1.95169	EHMT1	chr9:140624423:+	chr9_137729977_+
chr2:32827005-32827069:mpeak_46566|chr2_32582095_32842791_BIRC6_NM_+|	41.547	-4.09308	1.41774	-2.88704	0.0038888	0.031726	1.70234	0	0	5.14171	0	5.5656	115.759	137.622	64.0401	46.2754	79.0459	43.4117	1.60891	-2.653	0.911656	-3.56466	BIRC6	-	-
chr14:24679549-24679670:mpeak_25201|chr14_24679141_24683036_CHMP4A_NM_-|	125.562	-2.24189	0.731874	-3.06322	0.0021897	0.0221046	11.9164	1.05863	0.853867	19.5385	9.5236	7.23528	260.459	324.999	276.653	201.555	207.615	185.335	1.60408	-1.39218	0.536186	-1.92836	CHMP4A	chr14:24679605:-;chr14:24679644:-	-
chr12:13137147-13137200:mpeak_18087|chr12_13128413_13153243_HEBP1_NM_-|	147.756	-2.02447	0.875084	-2.31345	0.0206978	0.0939364	0	5.29314	0	1.02834	9.5236	6.12216	275.78	358.875	362.894	191.272	305.708	256.574	1.59184	-1.65541	0.404677	-2.06009	HEBP1	chr12:13137149:-	chr12_12984216_-
chr6:33247310-33247392:mpeak_73204|chr6_33247151_33257304_WDR46_NM_-|	155.934	-2.06585	0.568829	-3.63177	0.000281489	0.00615842	11.9164	2.11725	5.97707	15.4251	9.5236	9.46152	393.242	407.572	456.819	189.215	221.9	148.045	1.59114	-0.782064	1.16938	-1.95144	WDR46	-	-
chr16:84125331-84125463:mpeak_34655|chr16_84088250_84150548_MBTPS1_NM_-|	303.801	-1.48669	0.473556	-3.13941	0.0016929	0.018705	8.51172	5.29314	16.2235	30.8503	17.1425	28.3846	653.7	665.877	572.945	490.519	635.224	520.94	1.58668	-1.34682	0.200747	-1.54757	MBTPS1	-	-
chr1:11155896-11155949:mpeak_550|chr1_11126805_11159967_EXOSC10_NM_-|	103.109	-1.53197	0.730236	-2.09791	0.035913	0.135436	5.10703	3.17588	4.26934	2.05668	1.90472	12.2443	260.459	246.66	286.046	130.599	136.188	148.602	1.58255	-0.368558	0.933159	-1.30172	EXOSC10	-	-
chr9:72901104-72901181:mpeak_85580|chr9_72873877_72967106_SMC5_NM_+|	85.9691	-4.11935	1.28468	-3.20652	0.00134351	0.0161069	1.70234	0	0	24.6802	12.3807	8.3484	90.2243	133.387	101.61	212.867	223.805	222.624	1.57032	-4.73739	-1.0195	-3.71789	SMC5	-	chr9_70286242_+
chr3:186503563-186503891:mpeak_62579|chr3_186501360_186506913_EIF4A2_NM_+|	273.652	-1.35129	0.653409	-2.06806	0.0386344	0.142885	18.7258	5.29314	3.41547	18.5102	19.9996	13.3574	687.747	644.704	419.249	393.855	657.129	401.837	1.56616	-0.918835	0.2699	-1.18874	EIF4A2	chr3:186503672:+	chr3_186785886_+
chr4:142962945-142962999:mpeak_66135|chr4_142950067_143767604_INPP4B_NM_-|	56.227	-3.33928	1.30212	-2.5645	0.0103324	0.0607299	1.70234	0	0	9.25508	0.95236	3.33936	120.866	113.273	93.0715	117.231	107.617	107.416	1.56078	-2.99236	-0.0221071	-2.97025	INPP4B	-	-
chr10:52220523-52220582:mpeak_10602|chr10_52067081_52383737_SGMS1_NM_-|	39.6407	-4.20026	1.27974	-3.28211	0.00103034	0.0136815	0	1.05863	0	5.14171	12.3807	9.46152	64.6891	84.6902	54.6475	80.2107	77.1412	86.2668	1.5566	-4.67183	-0.255866	-4.41597	SGMS1	-	-
chr3:195250490-195250590:mpeak_62776|chr3_195243740_195270224_PPP1R2_NM_-|	39.3719	-3.41067	1.20488	-2.8307	0.0046446	0.0359159	1.70234	0	0.853867	8.22673	1.90472	8.90496	66.3915	112.214	68.3094	45.247	81.903	76.8053	1.55289	-2.89668	0.275763	-3.17245	PPP1R2	chr3:195250490:-	chr3_195523694_-
chr12:53428436-53428515:mpeak_19419|chr12_53400041_53433926_EIF4B_NM_+|	558.068	-0.853597	0.424294	-2.01181	0.0442404	0.156791	23.8328	7.41039	26.4699	30.8503	19.9996	27.2715	1261.44	1302.11	1176.63	952.244	984.74	883.818	1.54306	-0.436816	0.407001	-0.843818	EIF4B	-	chr12_53034704_+
chr13:52991185-52991237:mpeak_24095|chr13_52990058_53024813_VPS36_NM_-|	42.2969	-2.98321	1.42001	-2.10084	0.0356549	0.134593	0	1.05863	0	11.3118	2.85708	0.55656	54.475	71.9867	81.9713	94.6074	95.236	93.5021	1.52369	-3.79804	-0.442979	-3.35506	VPS36	-	-
chr19:11145665-11145815:mpeak_42343|chr19_11071597_11172459_SMARCA4_NM_+|	507.554	-1.01921	0.411293	-2.47806	0.0132098	0.0710968	34.0469	19.0553	22.2006	11.3118	11.4283	8.90496	1821.51	1407.97	1712.86	332.154	355.23	353.972	1.52362	1.25072	2.24673	-0.996007	SMARCA4	-	-
chr19:49508102-49508152:mpeak_44630|chr19_49497155_49519073_RUVBL2_NM_+|	138.642	-2.19456	0.952586	-2.30379	0.0212344	0.0951597	0	5.29314	0	0	3.80944	8.90496	357.492	266.774	428.641	214.923	198.091	179.769	1.50815	-1.26427	0.828803	-2.09307	RUVBL2	chr19:49508153:+	chr19_49004895_+
chr17:38285944-38286072:mpeak_37260|chr17_38278789_38290531_MSL1_NM_+|	221.241	-1.29399	0.567671	-2.27947	0.0226391	0.0994522	1.70234	11.6449	5.97707	16.4535	26.6661	10.0181	406.86	492.262	385.094	433.96	439.038	425.212	1.50476	-1.45932	-0.0156358	-1.44368	MSL1	chr17:38285996:+;chr17:38286065:+	chr17_40129741_+;chr17_40129808_+
chr2:95770113-95770266:mpeak_48310|chr2_95753326_95787754_MRPS5_NM_-|	129.98	-2.22212	0.884781	-2.51149	0.0120222	0.0669378	0	0	5.1232	0	3.80944	9.46152	345.576	363.109	315.077	153.223	179.044	185.335	1.50129	-1.37315	0.983968	-2.35712	MRPS5	-	-
chr1:109762701-109762765:mpeak_3953|chr1_109756514_109780352_SARS_NM_+|	240.632	-1.51719	0.674879	-2.24809	0.0245704	0.10457	0	0	8.53867	8.22673	3.80944	7.79184	536.239	517.669	669.432	378.43	405.705	351.746	1.48642	-1.21546	0.601395	-1.81685	SARS	chr1:109762754:+	chr1_109220129_+
chr3:172468529-172468659:mpeak_62157|chr3_172468474_172537937_ECT2_NM_+|	83.9572	-1.77307	0.751745	-2.3586	0.0183438	0.0870043	1.70234	4.23451	0.853867	3.08503	9.5236	11.6878	125.974	169.38	162.235	165.563	179.044	174.203	1.48402	-1.83911	-0.181155	-1.65795	ECT2	-	-
chr1:36644529-36644632:mpeak_1845|chr1_36621565_36645848_MAP7D1_NM_+|	127.978	-2.40582	0.733471	-3.28005	0.00103788	0.0136851	6.80938	2.11725	0	5.14171	8.57124	9.46152	304.72	285.829	313.369	167.62	236.185	195.909	1.48132	-1.37635	0.591917	-1.96827	MAP7D1	-	chr1_36178957_+;chr1_36178978_+
chr6:41037810-41037865:mpeak_73544|chr6_41035176_41040188_OARD1_NM_-|	79.6273	-2.09924	0.932551	-2.25107	0.024381	0.104161	3.40469	2.11725	0	2.05668	0.95236	8.3484	199.174	171.498	188.705	129.571	106.664	143.036	1.48074	-1.04039	0.56059	-1.60098	OARD1	-	-
chr1:114946097-114946227:mpeak_4354|chr1_114940482_115053781_TRIM33_NM_-|	458.723	-1.72741	0.639784	-2.7	0.00693403	0.0463292	20.4281	6.35176	1.70773	63.7572	45.7133	36.1764	515.811	788.677	619.908	973.84	1139.98	1292.33	1.48034	-2.35407	-0.823736	-1.53033	TRIM33	-	-
chr15:64687592-64687734:mpeak_29924|chr15_64680002_64747195_TRIP4_NM_+|	49.2085	-2.87923	0.941314	-3.05874	0.00222273	0.0222325	0	1.05863	2.5616	11.3118	4.7618	2.7828	134.485	98.4523	135.765	55.5305	64.7605	79.0316	1.47283	-2.3809	0.887353	-3.26825	TRIP4	-	-
chr10:94326488-94326538:mpeak_11783|chr10_94214296_94333852_IDE_NM_-|	71.5021	-2.53744	1.19891	-2.11646	0.0343053	0.131019	0	2.11725	0	0	2.85708	7.79184	149.806	173.615	109.295	136.769	153.33	122.443	1.46788	-2.33044	0.0688779	-2.39932	IDE	chr10:94326485:-	chr10_92566731_-
chr17:65850043-65850103:mpeak_39183|chr17_65821779_65978367_BPTF_NM_+|	62.247	-4.50489	1.31177	-3.43419	0.000594324	0.00971117	0	0	1.70773	22.6235	1.90472	23.9321	158.318	115.39	75.9942	102.834	125.712	118.547	1.46502	-4.82665	0.0108063	-4.83745	BPTF	-	chr17_67853977_+
chr1:225700560-225700659:mpeak_8446|chr1_225685514_225840845_ENAH_NM_-|	222.205	-1.65383	0.65055	-2.54221	0.0110153	0.0636375	10.2141	2.11725	2.5616	34.9636	12.3807	15.5837	306.422	382.164	329.593	509.029	523.798	537.637	1.4627	-2.07907	-0.6252	-1.45387	ENAH	-	-
chr1:8021751-8021859:mpeak_358|chr1_8021713_8044953_PARK7_NM_+|	637.642	-1.43854	0.409581	-3.51221	0.000444392	0.00812308	30.6422	17.9967	16.2235	55.5305	29.5232	31.1674	1366.98	1538.19	1532.69	983.095	1079.02	970.641	1.46157	-0.841417	0.549233	-1.39065	PARK7	-	-
chr19:41774125-41774255:mpeak_44033|chr19_41768380_41812353_HNRNPUL1_NM_+mpeak_44033|chr19_41768380_41812353_HNRNPUL1_NM_+||	559.428	-1.44816	0.621705	-2.32933	0.0198414	0.0913895	28.9399	5.29314	21.3467	49.3604	17.1425	39.5158	1251.22	1049.1	1506.22	914.196	895.219	935.578	1.46011	-0.931689	0.47168	-1.40337	HNRNPUL1	-	chr19_41268330_+
chr10:81961731-81961783:mpeak_11454|chr10_81915668_81965433_ANXA11_NM_-|	153.229	-2.133	0.738758	-2.88728	0.00388583	0.031726	10.2141	0	0.853867	5.14171	11.4283	5.00904	384.73	351.464	402.172	188.187	241.899	237.651	1.4584	-0.963247	0.769612	-1.73286	ANXA11	-	-
chr15:41550719-41550772:mpeak_28721|chr15_41523436_41571533_CHP1_NM_+|	88.8189	-2.56731	0.79461	-3.2309	0.001234	0.0152259	1.70234	4.23451	0	10.2834	4.7618	7.79184	177.044	206.432	229.69	137.798	164.758	121.33	1.45234	-1.94361	0.532602	-2.47621	CHP1	chr15:41550772:+	chr15_41258573_+
chr4:113174356-113174439:mpeak_65642|chr4_113152894_113189299_AP1AR_NM_+|	106.807	-2.13599	0.96183	-2.22075	0.0263676	0.109604	1.70234	0	1.70773	21.5952	7.61888	8.90496	108.95	140.797	103.318	297.191	290.47	299.429	1.44877	-3.48263	-1.32914	-2.15349	AP1AR	-	-
chr16:71811524-71811695:mpeak_34237|chr16_71767062_71842976_AP1G1_NM_-|	416.589	-1.53041	0.526398	-2.90733	0.00364531	0.0304449	6.80938	24.3484	10.2464	43.1904	24.7614	18.923	876.708	912.537	1093.8	667.394	635.224	685.126	1.43613	-1.06916	0.536463	-1.60562	AP1G1	chr16:71811540:-	-
chr3:48966040-48966112:mpeak_58949|chr3_48956280_49020631_ARIH2_NM_+|	263.978	-1.23373	0.527097	-2.34061	0.0192522	0.08969	8.51172	6.35176	5.97707	16.4535	10.476	24.4887	413.67	484.851	555.014	485.377	593.32	563.239	1.43378	-1.30288	-0.175833	-1.12705	ARIH2	chr3:48966053:+;chr3:48966104:+	chr3_48928620_+;chr3_48928666_+
chr14:73566007-73566149:mpeak_26903|chr14_73525220_73586420_RBM25_NM_+|	62.8628	-2.38733	1.13528	-2.10286	0.0354783	0.134047	0	0	1.70773	2.05668	4.7618	5.00904	120.866	132.328	105.026	107.976	130.473	144.149	1.43018	-2.79199	-0.0949823	-2.69701	RBM25	-	-
chr13:20657042-20657183:mpeak_22865|chr13_20532809_20659961_ZMYM2_NM_+|	162.359	-2.34239	0.992587	-2.35988	0.0182806	0.0868509	0	3.17588	0	7.19839	5.71416	16.6968	182.151	282.654	204.074	355.806	462.847	427.995	1.42442	-3.22082	-0.898238	-2.32259	ZMYM2	-	-
chr19:49409288-49409341:mpeak_44615|chr19_49403306_49425574_NUCB1_NM_+|	88.1271	-2.06665	0.871279	-2.37197	0.0176937	0.0853889	0	5.29314	0.853867	6.17005	7.61888	3.33936	137.89	287.947	223.713	121.344	160.949	102.407	1.41952	-1.47843	0.755705	-2.23413	NUCB1	chr19:49409339:+	chr19_48906083_+
chr1:151509195-151509251:mpeak_5595|chr1_151483861_151509680_CGN_NM_+|	79.8139	-1.76964	0.885772	-1.99785	0.0457325	0.16012	5.10703	2.11725	1.70773	0	1.90472	9.46152	180.449	206.432	242.498	84.324	115.236	108.529	1.41918	-0.347697	1.03058	-1.37828	CGN	-	chr1_151536775_+
chr4:102269344-102269414:mpeak_65362|chr4_102268933_102269480_FLJ20021_NR_+|	236.455	-1.55235	0.474628	-3.27066	0.00107295	0.0139089	5.10703	5.29314	11.1003	17.4818	20.9519	17.2534	444.312	580.128	490.974	367.118	451.419	426.325	1.41878	-1.37298	0.283726	-1.6567	FLJ20021	chr4:102269402:+	chr4_101348241_+
chr16:4890463-4890652:mpeak_31881|chr16_4855311_4897303_GLYR1_NM_-|	153.34	-3.17401	0.786119	-4.03757	5.40077e-05	0.00229449	0	5.29314	0	9.25508	5.71416	13.914	427.289	309.119	389.364	225.207	229.519	225.407	1.41054	-2.44804	0.727026	-3.17506	GLYR1	-	chr16_4840463_-
chr13:33275535-33275581:mpeak_23365|chr13_33160563_33349154_PDS5B_NM_+|	55.5232	-3.63192	1.36441	-2.6619	0.00777011	0.0500895	1.70234	0	0	5.14171	5.71416	2.22624	137.89	150.325	74.2865	120.316	65.7129	102.964	1.40883	-2.942	0.326955	-3.26895	PDS5B	-	-
chr17:3746370-3746512:mpeak_35466|chr17_3716573_3749545_C17orf85_NM_-|	166.825	-1.72298	0.660234	-2.60964	0.0090637	0.0556733	0	4.23451	5.97707	6.17005	11.4283	12.8009	309.827	468.972	310.808	256.057	352.373	263.253	1.40577	-1.57383	0.321931	-1.89576	C17orf85	-	-
chr3:128999661-128999725:mpeak_60829|chr3_128997683_129023431_HMCES_NM_+|	222.493	-2.07557	0.66677	-3.11288	0.00185273	0.0199227	3.40469	7.41039	17.9312	17.4818	9.5236	9.46152	951.611	414.982	679.678	167.62	203.805	187.004	1.40481	-0.343213	1.87355	-2.21676	HMCES	chr3:128999721:+	chr3_129280876_+
chr6:70415944-70416001:mpeak_74160|chr6_70386163_70507049_LMBRD1_NM_-|	78.4551	-1.95851	0.857076	-2.28511	0.0223066	0.0985035	0	3.17588	1.70773	10.2834	2.85708	3.89592	144.699	192.67	186.143	99.7491	157.139	139.14	1.39928	-1.8026	0.402619	-2.20522	LMBRD1	-	-
chr22:34276957-34277107:mpeak_56690|chr22_33670610_34316416_LARGE_NM_-|	51.1927	-4.53445	1.2976	-3.49449	0.000474964	0.0084871	1.70234	0	0	10.2834	0.95236	6.67872	115.759	116.449	134.057	65.8139	75.2365	87.38	1.39435	-3.39553	0.681136	-4.07667	LARGE	-	-
chr1:46072451-46072546:mpeak_2350|chr1_46049659_46083732_NASP_NM_+|	167.116	-1.93136	0.752929	-2.56513	0.0103138	0.0606627	6.80938	4.23451	0	14.3968	5.71416	4.45248	320.041	424.51	444.011	214.923	281.899	284.402	1.39377	-1.15326	0.605408	-1.75867	NASP	chr1:46072547:+	-
chr13:53232523-53232609:mpeak_24123|chr13_53226830_53261868_SUGT1_NM_+|	214.892	-2.3318	1.0169	-2.29305	0.0218452	0.0969724	5.10703	0	0	11.3118	1.90472	9.46152	321.743	506.024	271.53	451.442	500.941	499.235	1.39372	-2.15074	-0.401081	-1.74966	SUGT1	chr13:53232603:+	chr13_52658462_+
chr7:763629-763681:mpeak_76561|chr7_590239_767313_PRKAR1B_NM_-|	135.234	-1.7239	0.665643	-2.58982	0.00960256	0.0579034	6.80938	3.17588	2.5616	13.3684	7.61888	7.79184	250.245	299.592	351.793	211.838	290.47	177.543	1.39158	-1.1977	0.407316	-1.60501	PRKAR1B	-	-
chr5:179696269-179696352:mpeak_71729|chr5_179663531_179719071_MAPK9_NM_-|	84.3974	-1.73423	0.846694	-2.04824	0.0405369	0.147426	3.40469	2.11725	0.853867	11.3118	7.61888	3.89592	205.984	145.032	109.295	168.648	174.282	180.326	1.38511	-1.84003	-0.184908	-1.65513	MAPK9	chr5:179696268:-	chr5_180269265_-
chr3:47953604-47953667:mpeak_58884|chr3_47894529_48130769_MAP4_NM_-|	409.797	-0.991365	0.463529	-2.13873	0.0324574	0.126887	15.3211	25.4071	10.2464	16.4535	7.61888	8.3484	1246.12	1138.02	1302.15	365.061	403.801	379.018	1.38282	0.65286	1.6832	-1.03034	MAP4	-	-
chr11:65736748-65736798:mpeak_15399|chr11_65729159_65746482_SART1_NM_+|	68.6984	-2.34627	0.717087	-3.27195	0.00106808	0.0138969	1.70234	1.05863	5.1232	5.14171	7.61888	5.00904	160.02	185.26	227.983	66.8422	85.7124	72.9094	1.37532	-1.17238	1.3463	-2.51868	SART1	-	-
chr12:49723396-49723446:mpeak_19091|chr12_49716970_49725355_TROAP_NM_+|	60.526	-2.65527	1.31526	-2.01882	0.0435061	0.154762	0	0	1.70773	10.2834	0	2.7828	90.2243	92.1006	190.412	99.7491	103.807	135.244	1.37448	-2.93569	0.137723	-3.07341	TROAP	-	-
chr15:59185151-59185268:mpeak_29681|chr15_59172306_59225852_SLTM_NM_-|	63.9348	-4.00466	1.12165	-3.57032	0.000356541	0.00709687	1.70234	1.05863	0	13.3684	22.8566	13.3574	97.0337	125.977	80.2635	99.7491	163.806	148.045	1.36558	-4.16658	-0.440622	-3.72596	SLTM	-	chr15_58892992_-
chr1:245025917-245026187:mpeak_9028|chr1_245017805_245027827_HNRNPU_NM_-mpeak_9028|chr1_245017805_245027827_HNRNPU_NM_-||	2167.47	-0.942647	0.439779	-2.14346	0.0320764	0.126118	105.545	57.1659	97.3409	69.9272	30.4755	66.2307	6635.74	6055.35	6447.55	1882.89	2282.81	2278.56	1.35878	0.642123	1.5704	-0.928279	HNRNPU	chr1:245025933:-;chr1:245025968:-	chr1_244862684_-
chr11:47244650-47244723:mpeak_14562|chr11_47236492_47260350_DDB2_NM_+|	153.389	-1.39528	0.625762	-2.22973	0.0257655	0.107735	6.80938	3.17588	5.1232	6.17005	13.333	5.00904	304.72	386.399	422.664	232.405	262.851	192.013	1.3565	-0.698139	0.69652	-1.39466	DDB2	chr11:47244704:+	chr11_47223170_+
chr1:109967875-109967939:mpeak_3998|chr1_109944712_109969108_PSMA5_NM_-|	284.978	-2.16384	0.457195	-4.73285	2.21387e-06	0.000271183	5.10703	13.7622	11.1003	17.4818	20.9519	30.6108	711.58	712.456	788.973	312.616	426.657	368.443	1.35424	-1.20403	0.998422	-2.20246	PSMA5	chr1:109967881:-	chr1_109425261_-
chr11:63584969-63585147:mpeak_15126|chr11_63580845_63594399_C11orf84_NM_+|	115.762	-2.36235	1.03473	-2.28307	0.0224265	0.0988262	0	3.17588	0	7.19839	9.5236	1.11312	240.031	229.722	234.814	173.79	257.137	232.642	1.35227	-2.48949	0.0864886	-2.57598	C11orf84	-	-
chr2:26508326-26508451:mpeak_46215|chr2_26467615_26512785_HADHB_NM_+|	118.539	-2.12889	0.803275	-2.65026	0.00804288	0.05115	3.40469	8.46902	1.70773	8.22673	0.95236	12.2443	357.492	263.598	383.386	96.6641	123.807	162.516	1.35209	-0.657552	1.39108	-2.04863	HADHB	chr2:26508399:+	chr2_26285519_+
chr1:156520603-156520661:mpeak_6115|chr1_156496391_156542396_IQGAP3_NM_-|	75.1388	-4.0133	1.07956	-3.71754	0.000201175	0.00510609	0	3.17588	0	6.17005	3.80944	3.89592	265.566	295.357	145.157	56.5588	81.903	40.0723	1.34937	-2.1273	1.98363	-4.11093	IQGAP3	-	-
chr12:56575522-56575627:mpeak_19781|chr12_56557549_56583351_SMARCC2_NM_-|	395.456	-1.35926	0.571968	-2.37646	0.0174795	0.0846631	23.8328	10.5863	11.1003	24.6802	13.333	6.12216	1174.62	1043.81	1156.99	391.798	426.657	461.945	1.34856	0.0445444	1.39847	-1.35393	SMARCC2	-	-
chr17:3979370-3979494:mpeak_35482|chr17_3910264_4046253_ZZEF1_NM_-|	75.909	-2.22763	0.695515	-3.20285	0.00136074	0.016153	1.70234	1.05863	6.83094	4.11337	3.80944	4.45248	233.221	243.484	238.229	49.3604	56.1892	68.4569	1.34165	-0.367572	2.03867	-2.40624	ZZEF1	-	-
chr17:42489305-42489359:mpeak_37651|chr17_42478821_42580970_GPATCH8_NM_-|	116.659	-1.67867	0.615594	-2.72691	0.00639309	0.043901	3.40469	3.17588	5.1232	7.19839	6.66652	7.79184	274.078	316.53	283.484	134.713	195.234	162.516	1.33897	-0.887843	0.827771	-1.71561	GPATCH8	-	-
chr8:63951209-63951268:mpeak_82258|chr8_63928012_63951610_GGH_NM_-|	106.621	-2.76995	0.790392	-3.50453	0.000457415	0.00826084	6.80938	2.11725	0.853867	9.25508	5.71416	21.1493	243.435	208.55	279.215	137.798	171.425	193.126	1.3376	-1.88476	0.541575	-2.42633	GGH	-	-
chr7:100463103-100463172:mpeak_79215|chr7_100450340_100463340_SLC12A9_NM_+|	134.334	-1.44266	0.624367	-2.3106	0.0208548	0.0942088	5.10703	2.11725	6.83094	6.17005	9.5236	4.45248	325.148	295.357	434.619	167.62	184.758	170.307	1.33209	-0.519396	1.0134	-1.53279	SLC12A9	chr7:100463171:+	chr7_100865565_+
chr16:8997205-8997268:mpeak_31964|chr16_8987961_9057341_USP7_NM_-|	1122.55	-0.94354	0.355508	-2.65406	0.0079529	0.0507305	25.5352	30.7002	35.0086	48.3321	51.4274	64.561	1874.28	2586.23	2390.83	1855.13	2114.24	2394.32	1.33177	-0.848712	0.106522	-0.955234	USP7	-	-
chr10:32308804-32308894:mpeak_10160|chr10_32300444_32345371_KIF5B_NM_-|	322.427	-1.94974	0.509524	-3.82659	0.000129931	0.00392206	5.10703	6.35176	5.1232	40.1053	39.9991	46.7511	386.432	497.555	363.748	682.819	964.741	830.388	1.32897	-2.9355	-0.989835	-1.94566	KIF5B	-	chr10_32019834_-;chr10_32019886_-
chr2:136605674-136605848:mpeak_49534|chr2_136598521_136634047_MCM6_NM_-|	208.217	-1.76531	0.809219	-2.1815	0.0291468	0.117814	11.9164	4.23451	0	9.25508	0.95236	5.5656	752.436	471.089	612.223	195.385	219.043	216.502	1.3197	0.0341561	1.54082	-1.50666	MCM6	-	-
chr3:121435865-121435990:mpeak_60449|chr3_121383461_121468614_GOLGB1_NM_-|	128.973	-4.15472	0.91982	-4.51688	6.27575e-06	0.000552528	6.80938	0	0.853867	22.6235	15.2378	33.3936	243.435	439.33	188.705	129.571	236.185	231.529	1.31902	-3.21696	0.545031	-3.76199	GOLGB1	-	-
chr20:30704378-30704439:mpeak_53109|chr20_30697308_30753097_TM9SF4_NM_+|	113.083	-2.35336	0.974152	-2.4158	0.0157006	0.0789419	0	1.05863	7.68481	3.08503	13.333	1.66968	303.017	253.012	442.303	98.7208	132.378	100.737	1.31371	-1.04874	1.58905	-2.63779	TM9SF4	chr20:30704432:+	chr20_32116629_+
chr2:96966724-96966801:mpeak_48384|chr2_96940893_96971307_SNRNP200_NM_-mpeak_48384|chr2_96940893_96971307_SNRNP200_NM_-||	816.25	-1.02097	0.419226	-2.43537	0.0148766	0.0766345	35.7492	34.9347	35.8624	14.3968	10.476	15.0271	3030.17	3057.32	2041.6	445.272	586.654	487.547	1.31068	1.41703	2.41952	-1.0025	SNRNP200	-	-
chr21:32529466-32529521:mpeak_55042|chr21_32493155_32931290_TIAM1_NM_-|	40.0548	-3.50733	1.32844	-2.64018	0.00828621	0.052226	0	1.05863	0	2.05668	4.7618	5.5656	62.9868	70.928	108.441	67.8706	65.7129	91.2759	1.31042	-3.54822	0.108105	-3.65633	TIAM1	-	-
chr4:724407-724457:mpeak_63132|chr4_699572_759819_PCGF3_NM_+|	133.139	-2.5599	1.20391	-2.12633	0.0334759	0.129249	3.40469	0	0	10.2834	0	3.89592	212.793	282.654	288.607	189.215	299.041	307.778	1.30273	-2.0582	-0.021877	-2.03632	PCGF3	-	-
chr1:161101242-161101409:mpeak_6304|chr1_161092313_161102478_DEDD_NM_-|	69.6289	-3.36581	1.33544	-2.52037	0.0117232	0.0658806	1.70234	0	0	3.08503	0.95236	8.3484	98.736	132.328	161.381	120.316	149.521	159.176	1.30134	-2.86309	-0.128529	-2.73456	DEDD	-	-
chr17:46926604-46926722:mpeak_37902|chr17_46908349_46940199_CALCOCO2_NM_+|	107.077	-2.14908	1.04832	-2.05001	0.0403633	0.147048	5.10703	1.05863	0	12.3401	0	4.45248	265.566	239.25	206.636	124.429	219.043	207.04	1.29995	-1.4455	0.36999	-1.81549	CALCOCO2	-	-
chr19:19030021-19030144:mpeak_43001|chr19_19010535_19030199_COPE_NM_-|	125.445	-2.00063	0.929177	-2.15312	0.0313093	0.124141	5.10703	2.11725	0	11.3118	0	6.67872	202.579	293.24	338.985	200.527	246.661	198.135	1.29808	-1.31631	0.371416	-1.68772	COPE	-	-
chr12:125467673-125467723:mpeak_22556|chr12_125432433_125473667_DHX37_NM_-|	126.221	-2.0253	0.917375	-2.20771	0.0272644	0.112394	0	2.11725	7.68481	12.3401	0.95236	2.22624	347.278	317.588	467.919	115.174	142.854	98.5112	1.29796	-0.662851	1.66774	-2.33059	DHX37	-	-
chr12:133120117-133120231:mpeak_22687|chr12_133067156_133159556_FBRSL1_NM_+|	111.234	-2.12566	0.6369	-3.33752	0.000845308	0.0121713	1.70234	3.17588	5.1232	8.22673	17.1425	7.79184	284.292	228.664	259.576	194.357	146.663	178.099	1.29463	-1.72928	0.573526	-2.30281	FBRSL1	chr12:133120198:+	chr12_132543610_+
chr12:123820941-123821045:mpeak_22418|chr12_123780597_123834988_SBNO1_NM_-|	124.391	-1.68706	0.822605	-2.05087	0.0402792	0.146995	1.70234	4.23451	0	13.3684	3.80944	4.45248	199.174	236.074	252.745	225.207	271.423	280.506	1.29439	-1.86529	-0.175773	-1.68951	SBNO1	-	-
chr20:31421470-31421665:mpeak_53166|chr20_31407698_31436477_MAPRE1_NM_+|	131.565	-2.10308	0.739303	-2.84468	0.00444566	0.0348236	8.51172	2.11725	1.70773	17.4818	7.61888	3.89592	338.767	336.643	281.776	171.733	207.615	200.918	1.28885	-1.23293	0.722086	-1.95501	MAPRE1	-	chr20_32833834_+
chr2:85770276-85770429:mpeak_48083|chr2_85766100_85770792_MAT2A_NM_+|	211.556	-2.78644	0.895121	-3.11292	0.00185245	0.0199227	6.80938	0	0	4.11337	2.85708	10.0181	481.764	488.027	617.346	269.426	359.992	298.316	1.28711	-1.31897	0.774644	-2.09361	MAT2A	chr2:85770286:+	chr2_85543187_+;chr2_85543211_+;chr2_85543331_+
chr3:25654015-25654214:mpeak_58145|chr3_25639968_25705863_TOP2B_NM_-|	224.824	-2.77422	0.721755	-3.84372	0.000121186	0.00375187	8.51172	6.35176	1.70773	52.4454	15.2378	36.1764	439.205	534.607	315.077	323.928	454.276	510.366	1.2857	-2.64788	0.000357849	-2.64824	TOP2B	-	chr3_25612585_-
chr1:24082329-24082475:mpeak_1090|chr1_24069855_24086001_TCEB3_NM_+|	85.5977	-1.96803	0.818431	-2.40464	0.0161885	0.0804853	5.10703	1.05863	1.70773	9.25508	0	7.23528	205.984	177.849	228.836	105.919	142.854	141.366	1.2851	-1.06656	0.651119	-1.71768	TCEB3	-	-
chr3:52028873-52028930:mpeak_59136|chr3_52028142_52029958_RPL29_NM_-|	284.635	-1.36432	0.609322	-2.23908	0.0251504	0.106127	5.10703	0	6.83094	13.3684	12.3807	17.2534	366.004	534.607	494.389	585.126	759.983	620.565	1.28365	-1.84886	-0.494759	-1.3541	RPL29	chr3:52028875:-	chr3_51994862_-
chr7:117831108-117831223:mpeak_79706|chr7_117824085_117831965_LSM8_NM_+|	96.9002	-2.50253	1.0216	-2.44961	0.0143012	0.0746135	0	0	2.5616	9.25508	1.90472	5.5656	170.234	246.66	186.997	135.741	228.566	175.316	1.27255	-2.70692	0.162335	-2.86926	LSM8	-	chr7_118191100_+
chr5:37003399-37003457:mpeak_67645|chr5_36876860_37063891_NIPBL_NM_+|	59.4154	-4.23584	1.32583	-3.19485	0.00139902	0.016438	0	1.05863	0	12.3401	5.71416	20.0362	56.1774	105.863	87.9483	130.599	119.045	174.203	1.27041	-5.16916	-0.761685	-4.40748	NIPBL	-	-
chr16:4524756-4524906:mpeak_31839|chr16_4524703_4559629_HMOX2_NM_+|	114.92	-3.04775	1.30069	-2.34318	0.01912	0.0892832	3.40469	0	0	2.05668	11.4283	0.55656	197.472	341.937	270.676	163.506	174.282	213.719	1.26086	-2.04411	0.554692	-2.5988	HMOX2	chr16:4524896:+	chr16_4474902_+
chr9:134086699-134086759:mpeak_87782|chr9_134000947_134108840_NUP214_NM_+|	192.023	-2.1075	0.663634	-3.17569	0.0014948	0.0171425	1.70234	17.9967	4.26934	8.22673	7.61888	5.00904	684.343	721.984	498.659	102.834	138.092	113.538	1.25819	0.200761	2.42607	-2.22531	NUP214	chr9:134086756:+	chr9_131211369_+
chr5:54718742-54718816:mpeak_67968|chr5_54603575_54720547_SKIV2L2_NM_+|	37.9934	-4.13515	1.39345	-2.96757	0.00300164	0.0269892	0	1.05863	0	12.3401	3.80944	1.11312	80.0102	100.57	73.4326	53.4738	66.6652	63.4479	1.25029	-4.02739	0.468436	-4.49582	SKIV2L2	-	chr5_55422979_+
chr16:11034540-11034640:mpeak_32035|chr16_11023416_11036257_DEXI_NM_-|	131.029	-1.9452	0.780083	-2.49358	0.0126461	0.0694508	1.70234	5.29314	0	3.08503	9.5236	8.3484	282.589	209.608	349.232	234.462	238.09	230.416	1.24707	-1.58294	0.259383	-1.84232	DEXI	-	-
chrX:153676830-153676915:mpeak_90691|chrX_153672472_153678771_FAM50A_NM_+|	108.671	-2.32707	0.834064	-2.79004	0.00527011	0.0385983	3.40469	0	2.5616	5.14171	6.66652	8.90496	182.151	295.357	243.352	173.79	235.233	147.488	1.24149	-1.79564	0.373309	-2.16895	FAM50A	-	chrX_154448502_+;chrX_154448515_+
chr20:37557072-37557214:mpeak_53492|chr20_37554954_37580181_FAM83D_NM_+|	134.282	-1.64459	0.691816	-2.37721	0.0174442	0.08461	3.40469	6.35176	4.26934	5.14171	8.57124	4.45248	314.934	331.35	488.412	118.259	124.759	201.475	1.23608	-0.373114	1.35207	-1.72519	FAM83D	-	-
chr1:10754345-10754393:mpeak_527|chr1_10700116_10856733_CASZ1_NM_-|	48.1109	-4.72445	1.40907	-3.3529	0.00079971	0.011694	1.70234	0	0	1.02834	0.95236	8.3484	160.02	164.087	90.5099	57.5871	48.5704	44.5248	1.23175	-2.60112	1.46027	-4.06139	CASZ1	-	-
chr17:58453803-58453953:mpeak_38631|chr17_58256789_58469586_USP32_NM_-|	407.261	-1.32765	0.627476	-2.11586	0.034357	0.131099	5.10703	6.35176	11.9541	35.992	42.8562	16.1402	520.918	897.716	483.289	905.969	1044.74	916.098	1.23101	-2.02045	-0.591986	-1.42846	USP32	chr17:58453893:-	-
chr13:28225362-28225432:mpeak_23196|chr13_28194879_28239822_POLR1D_NM_+|	109.995	-3.31549	1.19983	-2.76329	0.00572213	0.0409166	0	2.11725	0	7.19839	8.57124	16.1402	146.402	103.745	266.407	185.102	287.613	296.647	1.22964	-3.91374	-0.574742	-3.33899	POLR1D	-	chr13_27651288_+
chr10:114717186-114717305:mpeak_12644|chr10_114710008_114925313_TCF7L2_NM_+|	71.0632	-3.14925	1.21578	-2.59032	0.00958864	0.057888	0	2.11725	0	2.05668	8.57124	2.22624	195.77	101.628	220.298	101.806	111.426	106.86	1.22693	-2.60197	0.69362	-3.29559	TCF7L2	-	-
chr9:140514620-140514676:mpeak_88230|chr9_140513443_140729224_EHMT1_NM_+|	114.857	-3.2992	0.813171	-4.0572	4.96639e-05	0.00217626	3.40469	5.29314	0	11.3118	7.61888	3.33936	400.051	233.957	429.495	95.6358	95.236	92.9456	1.22677	-1.35637	1.90579	-3.26216	EHMT1	-	-
chr7:140916126-140916176:mpeak_80333|chr7_140774031_141170335_TMEM178B_NM_+|	74.5756	-3.15828	1.28486	-2.45807	0.0139686	0.073651	1.70234	0	0	0	5.71416	5.5656	142.997	148.208	126.372	155.28	163.806	145.262	1.22302	-2.72814	-0.153163	-2.57498	TMEM178B	-	-
chr1:16926052-16926181:mpeak_767|chr1_16890681_16940100_NBPF1_NM_-|	194.522	-2.41162	0.567393	-4.25035	2.13436e-05	0.00120177	11.9164	4.23451	2.5616	11.3118	16.1901	13.914	634.975	479.558	415.833	262.227	239.995	241.547	1.22275	-1.14618	1.04095	-2.18713	NBPF1	chr1:16926051:-;chr1:16926088:-	-
chr4:106848518-106848660:mpeak_65503|chr4_106816596_106890051_NPNT_NM_+|	239.821	-2.11753	0.855203	-2.47605	0.0132844	0.0711986	6.80938	0	0	4.11337	2.85708	6.12216	580.5	563.19	527.69	447.329	361.897	377.348	1.22223	-0.943157	0.494238	-1.4374	NPNT	-	chr4_105927503_+
chr8:96063880-96063944:mpeak_83000|chr8_96037213_96070036_NDUFAF6_NM_+|	55.3392	-3.37698	1.10274	-3.06235	0.00219604	0.0221046	1.70234	0	0.853867	7.19839	5.71416	10.0181	95.3313	104.804	114.418	97.6925	99.9978	126.339	1.21897	-3.1652	-0.0428189	-3.12238	NDUFAF6	-	-
chr6:151770605-151770665:mpeak_75967|chr6_151726402_151773316_RMND1_NM_-|	49.3744	-2.8306	1.36206	-2.07818	0.0376926	0.140528	0	1.05863	0	0	1.90472	7.23528	93.629	101.628	66.6017	100.777	99.9978	119.66	1.21282	-3.11	-0.291246	-2.81875	RMND1	-	-
chr12:116427755-116427807:mpeak_21837|chr12_116399203_116714991_MED13L_NM_-|	314.204	-1.78338	0.758932	-2.34986	0.0187804	0.0882336	8.51172	3.17588	0	14.3968	7.61888	26.7149	480.061	556.838	416.687	723.953	674.271	858.216	1.20608	-2.05985	-0.634431	-1.42542	MED13L	-	-
chr1:203765721-203765929:mpeak_7650|chr1_203764750_203821268_ZC3H11A_NM_+|	205.769	-1.85476	0.907471	-2.04387	0.040966	0.148539	5.10703	0	1.70773	23.6519	2.85708	12.2443	277.482	339.819	232.252	583.07	541.893	449.144	1.20324	-2.50758	-0.889757	-1.61782	ZC3H11A	chr1:203765938:+	chr1_203796642_+;chr1_203796801_+
chr17:61838269-61838324:mpeak_38973|chr17_61824321_61851088_CCDC47_NM_-|	389.818	-1.33505	0.595229	-2.24291	0.0249026	0.105555	10.2141	4.23451	6.83094	46.2754	19.0472	17.2534	595.821	690.225	490.12	963.556	927.599	906.637	1.19806	-1.95626	-0.655522	-1.30073	CCDC47	-	-
chr16:88987676-88987765:mpeak_34946|chr16_88943683_89043504_CBFA2T3_NM_-|	280.8	-1.32321	0.597795	-2.21348	0.0268646	0.111249	8.51172	3.17588	7.68481	16.4535	13.333	18.3665	614.547	355.699	659.186	633.458	431.419	607.764	1.18891	-1.31362	-0.03776	-1.27586	CBFA2T3	chr16:88987679:-	chr16_88921272_-
chr17:73031700-73031766:mpeak_39425|chr17_73028661_73059112_KCTD2_NR_+|	159.015	-2.52704	0.727197	-3.47503	0.000510789	0.0088467	0	5.29314	2.5616	14.3968	7.61888	20.5927	274.078	369.461	348.378	231.377	376.182	258.244	1.18781	-2.4395	0.196179	-2.63568	KCTD2	-	-
chr1:36850012-36850070:mpeak_1874|chr1_36807574_36851528_STK40_NM_-|	62.5054	-2.65543	1.19318	-2.2255	0.0260477	0.108558	1.70234	1.05863	0	7.19839	4.7618	3.89592	62.9868	146.091	141.742	113.118	106.664	160.846	1.18051	-2.52179	-0.117653	-2.40414	STK40	chr1:36850016:-	chr1_36384414_-
chr16:14554563-14554616:mpeak_32202|chr16_14530629_14724128_PARN_NM_-|	95.7677	-1.51996	0.694911	-2.18727	0.0287228	0.116546	3.40469	1.05863	4.26934	2.05668	4.7618	5.5656	231.519	243.484	266.407	132.656	130.473	123.556	1.17784	-0.503995	0.939109	-1.4431	PARN	chr16:14554565:-	chr16_14460709_-
chr2:191845345-191845399:mpeak_50778|chr2_191835443_191878976_STAT1_NM_-|	241.818	-2.47793	0.685175	-3.61649	0.00029862	0.00635751	10.2141	0	4.26934	20.5668	5.71416	12.2443	566.881	620.356	659.186	282.794	412.372	307.221	1.17661	-1.41141	0.881293	-2.2927	STAT1	chr2:191845345:-	-
chr1:8786383-8786442:mpeak_385|chr1_8415180_8877699_RERE_NM_-|	102.261	-4.03749	0.772178	-5.2287	1.70706e-07	5.15287e-05	1.70234	0	5.1232	16.4535	19.0472	8.90496	348.981	200.081	325.323	106.948	83.8077	110.755	1.17092	-2.70173	1.53606	-4.23778	RERE	-	-
chr14:69896141-69896198:mpeak_26758|chr14_69865095_69925079_SLC39A9_NM_+|	171.879	-2.01575	0.809587	-2.48985	0.0127796	0.0698556	3.40469	4.23451	0	10.2834	16.1901	4.45248	294.506	328.174	356.063	257.085	401.896	386.253	1.17077	-2.01733	-0.0948245	-1.9225	SLC39A9	chr14:69896193:+	chr14_69429475_+
chr17:78235366-78235546:mpeak_39818|chr17_78234659_78367144_RNF213_NM_+|	145.551	-3.26702	0.703597	-4.64331	3.42872e-06	0.000362244	6.80938	7.41039	1.70773	7.19839	13.333	13.914	519.215	588.597	255.306	99.7491	120.95	112.425	1.16846	-1.11279	2.03278	-3.14557	RNF213	chr17:78235404:+	chr17_80261609_+;chr17_80261634_+
chr5:179439630-179439688:mpeak_71717|chr5_179382669_179499118_RNF130_NM_-|	31.3997	-4.57834	1.33961	-3.41766	0.000631625	0.00997849	0	0	0.853867	9.25508	1.90472	7.23528	88.5219	47.6382	83.679	43.1904	53.3322	41.1855	1.16522	-4.42916	0.674836	-5.104	RNF130	-	-
chr1:179869532-179869586:mpeak_6934|chr1_179851176_179886586_TOR1AIP1_NM_+|	89.328	-4.07834	1.25698	-3.24457	0.00117628	0.0147507	1.70234	0	0	8.22673	5.71416	13.3574	154.913	122.801	161.381	200.527	192.377	210.936	1.16308	-4.00322	-0.459632	-3.54359	TOR1AIP1	-	-
chr17:3865691-3865773:mpeak_35470|chr17_3828735_3867758_ATP2A3_NM_-|	203.979	-2.08862	0.6468	-3.22916	0.00124157	0.0152747	5.10703	0	5.1232	7.19839	13.333	13.3574	337.064	492.262	490.974	340.381	382.849	360.094	1.16226	-1.72797	0.2854	-2.01337	ATP2A3	chr17:3865717:-	chr17_3962424_-
chr5:132272753-132272875:mpeak_69983|chr5_132216878_132299354_AFF4_NM_-|	94.4848	-2.16967	0.799746	-2.71295	0.00666871	0.0451919	1.70234	3.17588	0.853867	13.3684	3.80944	12.8009	178.746	142.915	172.481	215.952	167.615	220.398	1.16001	-2.38681	-0.289539	-2.09727	AFF4	-	-
chr1:214826261-214826345:mpeak_8140|chr1_214776531_214836933_CENPF_NM_+|	58.1606	-3.16818	1.18696	-2.66916	0.00760409	0.0495144	1.70234	1.05863	0	6.17005	10.476	2.22624	115.759	159.853	86.2406	88.4374	108.569	117.434	1.14451	-2.77302	0.202615	-2.97563	CENPF	-	chr1_214652969_+
chr11:73221724-73221863:mpeak_15998|chr11_73117789_73309234_FAM168A_NM_-|	96.598	-2.83529	0.864267	-3.28057	0.00103599	0.0136815	1.70234	4.23451	0.853867	10.2834	4.7618	24.4887	212.793	155.618	227.983	192.3	173.33	150.828	1.13863	-2.54145	0.207617	-2.74907	FAM168A	chr11:73221777:-	-
chr14:93753908-93754038:mpeak_27689|chr14_93709434_93799438_BTBD7_NM_-|	339.023	-1.22872	0.521232	-2.35735	0.0184061	0.087153	1.70234	7.41039	7.68481	22.6235	28.5708	22.819	423.884	615.062	436.326	748.633	785.697	967.858	1.13861	-2.13953	-0.762209	-1.37733	BTBD7	chr14:93753974:-	chr14_93287630_-
chr4:17594101-17594151:mpeak_63691|chr4_17578926_17609022_LAP3_NM_+|	56.6633	-2.71742	1.07414	-2.52987	0.0114105	0.0650695	0	2.11725	0.853867	2.05668	8.57124	4.45248	171.937	93.1592	126.372	90.4941	120.95	58.9954	1.13845	-2.3436	0.533592	-2.87719	LAP3	chr4:17594153:+	chr4_17592528_+
chr6:27113746-27113814:mpeak_72655|chr6_27106460_27114637_HIST1H2BK_NM_-|	156.048	-1.94388	0.904476	-2.14917	0.0316206	0.124886	3.40469	3.17588	0	3.08503	9.5236	11.1312	180.449	390.633	296.292	275.596	430.467	268.819	1.13802	-1.85102	-0.168572	-1.68245	HIST1H2BK	chr6:27113749:-	chr6_27145971_-
chr7:26235943-26236097:mpeak_77322|chr7_26231958_26240413_HNRNPA2B1_NM_-mpeak_77322|chr7_26231958_26240413_HNRNPA2B1_NM_-||	300.946	-1.12505	0.547112	-2.05635	0.0397493	0.145753	8.51172	6.35176	5.97707	17.4818	8.57124	14.4706	571.988	745.274	526.836	462.754	683.795	559.343	1.13012	-0.959369	0.112389	-1.07176	HNRNPA2B1	chr7:26236028:-;chr7:26236055:-	chr7_26196424_-;chr7_26196442_-;chr7_26196471_-
chr3:185655605-185655765:mpeak_62559|chr3_185635513_185655924_TRA2B_NM_-|	450.673	-3.04489	0.417527	-7.29268	3.03849e-13	1.28407e-09	13.6188	16.938	8.53867	67.8706	49.5227	42.2986	1322.72	1105.21	1045.13	536.794	629.51	569.918	1.12568	-2.03022	1.00026	-3.03047	TRA2B	-	-
chr7:150828342-150828406:mpeak_80597|chr7_150782917_150840823_AGAP3_NM_+|	218.478	-1.33238	0.613362	-2.17225	0.0298365	0.119982	8.51172	4.23451	2.5616	13.3684	9.5236	8.3484	359.195	472.148	531.959	327.013	468.561	416.307	1.12285	-1.02914	0.169857	-1.199	AGAP3	chr7:150828399:+	chr7_151131310_+
chr5:179308888-179309014:mpeak_71703|chr5_179291128_179334856_TBC1D9B_NM_-|	188.494	-2.38907	0.606082	-3.94182	8.08663e-05	0.0029334	8.51172	4.23451	4.26934	8.22673	17.1425	11.6878	488.573	389.575	646.378	225.207	266.661	191.457	1.11612	-1.12289	1.15772	-2.28061	TBC1D9B	-	-
chrX:70587124-70587279:mpeak_89512|chrX_70586088_70749562_TAF1_NR_+mpeak_89512|chrX_70586088_70683673_TAF1_NM_+||	126.315	-3.56628	0.749457	-4.75849	1.95051e-06	0.000253626	0	3.17588	2.5616	23.6519	31.4279	13.914	282.589	247.719	243.352	197.442	279.042	190.9	1.1124	-3.58798	0.213185	-3.80116	TAF1	chrX:70587179:+	chrX_71367328_+
chr5:16704678-16704741:mpeak_67379|chr5_16666902_16936385_MYO10_NM_-|	110.309	-2.73516	0.984534	-2.77812	0.00546736	0.0396653	0	3.17588	0	6.17005	0.95236	4.45248	331.957	275.243	250.183	161.45	134.283	155.837	1.11125	-1.86577	0.924993	-2.79076	MYO10	chr5:16704688:-	-
chr1:120536970-120537104:mpeak_4694|chr1_120459317_120612317_NOTCH2_NM_-|	282.512	-3.14531	0.717166	-4.38575	1.15587e-05	0.000769405	11.9164	4.23451	13.6619	32.9069	4.7618	22.2624	1126.95	793.971	767.627	189.215	193.329	229.303	1.10888	-1.00737	2.13559	-3.14296	NOTCH2	-	-
chr10:114917715-114917829:mpeak_12649|chr10_114710008_114925313_TCF7L2_NM_+|	71.3618	-2.68796	1.07992	-2.48902	0.0128094	0.0698936	1.70234	2.11725	0	9.25508	3.80944	1.66968	195.77	101.628	220.298	101.806	111.426	106.86	1.10671	-1.94768	0.69362	-2.64129	TCF7L2	-	-
chr6:32155112-32155184:mpeak_73144|chr6_32154251_32157963_PBX2_NM_-|	147.668	-2.18852	0.800583	-2.73366	0.00626341	0.0434429	6.80938	0	0.853867	5.14171	7.61888	5.00904	280.887	355.699	405.587	210.81	254.28	239.321	1.10297	-1.21339	0.565105	-1.77849	PBX2	-	-
chr4:74121121-74121235:mpeak_64639|chr4_73942007_74124502_ANKRD17_NM_-|	76.7988	-3.50915	1.34304	-2.61283	0.00897952	0.0554156	0	2.11725	0	5.14171	0.95236	7.79184	205.984	302.767	67.4555	113.118	133.33	82.9275	1.10234	-2.71336	0.806853	-3.52021	ANKRD17	-	-
chr5:141314145-141314219:mpeak_70624|chr5_141303384_141318085_KIAA0141_NM_+|	53.1872	-3.82228	1.14257	-3.34533	0.000821843	0.0119556	1.70234	0	0.853867	13.3684	3.80944	6.67872	91.9266	105.863	153.696	84.324	91.4266	84.5972	1.09089	-3.22231	0.433025	-3.65533	KIAA0141	chr5:141314220:+	chr5_141934654_+
chr17:49346145-49346268:mpeak_38102|chr17_49337896_49375142_UTP18_NM_+|	90.6595	-2.26119	0.728578	-3.10357	0.00191201	0.0202418	3.40469	1.05863	2.5616	10.2834	4.7618	6.12216	204.281	241.367	198.951	133.684	142.854	138.584	1.08981	-1.59129	0.634868	-2.22616	UTP18	-	chr17_51268887_+
chr19:1393838-1393893:mpeak_41638|chr19_1383882_1395389_NDUFS7_NM_+|	109.472	-2.97364	0.905341	-3.28455	0.00102144	0.0136599	3.40469	0	1.70773	6.17005	3.80944	16.6968	217.9	253.012	233.106	208.753	203.805	165.298	1.08927	-2.38348	0.2849	-2.66838	NDUFS7	chr19:1393892:+	chr19_1393890_+
chr10:76408383-76408556:mpeak_11291|chr10_75910942_76468078_ADK_NM_+|	113.634	-4.1945	0.833769	-5.03077	4.88518e-07	9.72504e-05	5.10703	0	0.853867	11.3118	17.1425	18.923	282.589	246.66	298	123.401	174.282	185.335	1.08085	-2.99059	0.776246	-3.76684	ADK	-	-
chr1:155885084-155885142:mpeak_6015|chr1_155884111_155904233_KIAA0907_NM_-|	52.9265	-4.47538	1.11162	-4.026	5.67332e-05	0.00236211	1.70234	1.05863	0	8.22673	7.61888	11.6878	100.438	131.27	151.988	76.0973	83.8077	61.2216	1.07936	-3.31793	0.795093	-4.11303	KIAA0907	-	-
chr1:36926855-36926918:mpeak_1880|chr1_36921526_36930040_MRPS15_NM_-|	69.8448	-2.21492	1.11699	-1.98294	0.0473742	0.163967	1.70234	0	0.853867	6.17005	2.85708	4.45248	103.843	121.742	131.496	165.563	158.092	141.366	1.0738	-2.3987	-0.381046	-2.01765	MRPS15	chr1:36926865:-	chr1_36461301_-
chr9:103103819-103103879:mpeak_86495|chr9_103064586_103115259_TEX10_NM_-|	86.9863	-3.0327	0.848604	-3.57376	0.000351897	0.00706121	1.70234	0	2.5616	6.17005	8.57124	9.46152	192.365	214.901	194.682	115.174	168.568	129.679	1.06254	-2.50491	0.542029	-3.04694	TEX10	-	-
chr22:19955157-19955228:mpeak_56053|chr22_19929262_19956058_COMT_NM_+|	823.752	-1.2495	0.488314	-2.55881	0.0105032	0.061484	17.0234	35.9933	14.5157	31.8786	19.9996	31.7239	2036	1705.45	2659.8	963.556	1234.26	1134.83	1.05499	-0.307957	0.941688	-1.24964	COMT	chr22:19955217:+	chr22_19967693_+
chr17:78006319-78006375:mpeak_39793|chr17_77914906_78009657_TBC1D16_NM_-|	142.114	-2.02617	1.01035	-2.00542	0.0449181	0.158131	0	3.17588	0	4.11337	3.80944	3.89592	308.124	233.957	362.04	330.098	212.376	243.773	1.0538	-1.89585	0.201532	-2.09738	TBC1D16	chr17:78006324:-	chr17_80032524_-
chr17:61476592-61476643:mpeak_38908|chr17_61086897_61497359_TANC2_NM_+|	128.989	-1.6425	0.681321	-2.41076	0.0159195	0.0795991	3.40469	5.29314	1.70773	2.05668	6.66652	7.23528	377.921	261.481	349.232	186.13	171.425	175.316	1.05252	-0.616969	0.891649	-1.50862	TANC2	chr17:61476647:+	chr17_63399282_+
chr10:114498355-114498427:mpeak_12631|chr10_114206755_114575048_VTI1A_NM_+|	48.5713	-3.34893	1.33904	-2.501	0.0123843	0.0683803	0	0	0.853867	0	12.3807	4.45248	78.3079	89.9833	75.1403	109.004	104.76	107.973	1.05229	-4.30115	-0.402364	-3.89879	VTI1A	chr10:114498423:+	chr10_112738663_+
chr1:26759376-26759447:mpeak_1264|chr1_26758772_26795382_DHDDS_NM_+|	73.7489	-4.83119	1.2984	-3.72088	0.000198528	0.00509213	1.70234	0	0	13.3684	10.476	4.45248	139.592	132.328	214.321	115.174	119.997	133.574	1.05031	-4.05505	0.399045	-4.45409	DHDDS	-	-
chr4:106646413-106646464:mpeak_65490|chr4_106629940_106766597_GSTCD_NM_+|	57.2757	-3.9921	1.38772	-2.87674	0.00401811	0.0323867	0	1.05863	0	16.4535	6.66652	1.66968	78.3079	105.863	119.541	120.316	119.997	117.434	1.04569	-4.54947	-0.236238	-4.31323	GSTCD	chr4:106646465:+	chr4_105725306_+
chr16:74695992-74696110:mpeak_34388|chr16_74657969_74700779_RFWD3_NM_-|	517.996	-1.61849	0.404027	-4.00589	6.1785e-05	0.0024867	10.2141	13.7622	11.9541	28.7936	23.809	31.7239	953.313	1183.55	1323.49	842.212	880.933	912.202	1.03834	-1.23078	0.392926	-1.62371	RFWD3	-	-
chr5:151123618-151123677:mpeak_70908|chr5_151122520_151138210_ATOX1_NM_-|	202.785	-2.24436	1.12803	-1.98963	0.0466319	0.162195	3.40469	0	0	9.25508	3.80944	3.33936	248.542	341.937	397.902	516.228	447.609	461.388	1.03341	-2.26844	-0.528051	-1.74039	ATOX1	chr5:151123619:-	chr5_151744037_-
chr20:49418684-49418743:mpeak_54138|chr20_49411430_49493022_BCAS4_NM_+|	152.534	-1.77116	0.773627	-2.28943	0.0220546	0.0976968	0	3.17588	2.5616	15.4251	1.90472	8.90496	246.84	281.595	304.831	282.794	329.517	352.859	1.03283	-2.19299	-0.212006	-1.98099	BCAS4	-	-
chr17:58701025-58701197:mpeak_38680|chr17_58677543_58740355_PPM1D_NM_+|	577.577	-1.22574	0.594573	-2.06155	0.0392509	0.144301	28.9399	4.23451	5.97707	25.7085	18.0948	20.5927	1317.61	1233.3	1252.62	912.139	939.027	1172.67	1.02934	-0.717908	0.330961	-1.04887	PPM1D	-	-
chr12:106772120-106772170:mpeak_21368|chr12_106751435_106903197_POLR3B_NM_+|	75.8845	-3.03473	1.09677	-2.76698	0.00565787	0.0405772	3.40469	0	0.853867	6.17005	0.95236	5.00904	219.602	290.064	111.003	76.0973	109.521	87.9365	1.02919	-1.51032	1.18199	-2.69231	POLR3B	-	-
chr22:45577163-45577218:mpeak_57246|chr22_45559725_45580333_NUP50_NM_+|	141.65	-1.87242	0.869657	-2.15306	0.0313144	0.124141	3.40469	1.05863	0.853867	17.4818	9.5236	10.0181	129.378	239.25	148.573	354.778	384.754	400.723	1.02807	-2.79971	-1.14056	-1.65915	NUP50	-	-
chr8:37963890-37963949:mpeak_81695|chr8_37963010_37996481_ASH2L_NM_+|	77.6585	-3.04778	0.970081	-3.14178	0.00167924	0.018626	3.40469	0	0.853867	3.08503	2.85708	6.12216	207.686	202.198	212.613	82.2673	109.521	101.294	1.02616	-1.5023	1.08676	-2.58906	ASH2L	-	-
chr9:90341123-90341318:mpeak_85938|chr9_90340973_90345922_CTSL_NM_+|	142.219	-2.56918	0.717661	-3.57993	0.000343685	0.00701648	10.2141	1.05863	0.853867	10.2834	4.7618	7.79184	374.516	355.699	452.55	131.628	198.091	159.176	1.02527	-0.913206	1.27457	-2.18777	CTSL	-	-
chr7:870025-870160:mpeak_76575|chr7_855193_912851_SUN1_NM_+|	157.02	-2.9316	0.806772	-3.63374	0.000279345	0.00615842	8.51172	0	0.853867	11.3118	3.80944	4.45248	529.429	345.113	498.659	165.563	165.711	150.828	1.02304	-1.06347	1.51013	-2.57361	SUN1	-	-
chr10:32309940-32310036:mpeak_10161|chr10_32300444_32345371_KIF5B_NM_-|	320.466	-2.50179	0.634345	-3.94389	8.01703e-05	0.00293333	0	4.23451	4.26934	50.3887	27.6184	33.3936	386.432	497.555	363.748	682.819	964.741	830.388	1.02231	-3.7115	-0.989835	-2.72167	KIF5B	-	chr10_32021046_-;chr10_32021083_-
chr3:15751195-15751247:mpeak_57994|chr3_15712063_15901053_ANKRD28_NM_-|	85.8439	-3.86426	1.48542	-2.60146	0.00928271	0.0565782	1.70234	0	0	16.4535	0	2.7828	177.044	193.729	130.642	149.11	173.33	185.335	1.01853	-3.49823	-0.0181822	-3.48005	ANKRD28	-	-
chr12:51079326-51079429:mpeak_19231|chr12_50898767_51138369_DIP2B_NM_+|	239.3	-2.96359	0.784084	-3.77968	0.000157029	0.0043162	0	7.41039	0	10.2834	2.85708	5.5656	774.567	826.788	584.899	260.17	214.281	184.778	1.01686	-1.33589	1.72961	-3.0655	DIP2B	chr12:51079377:+;chr12:51079432:+	chr12_50685646_+
chr13:31039922-31039986:mpeak_23269|chr13_31035670_31040081_HMGB1_NM_-|	6216.38	-1.14134	0.455629	-2.50497	0.0122461	0.0678267	190.663	69.8694	126.372	344.494	204.757	234.868	12638.2	12197.5	13272.5	11253.1	11842.6	12221.5	1.01528	-1.0191	0.10973	-1.12883	HMGB1	-	-
chr3:137938857-137938949:mpeak_61135|chr3_137906089_138014700_ARMC8_NM_+|	76.8131	-3.99663	1.50439	-2.65664	0.00789233	0.0504966	1.70234	0	0	13.3684	0.95236	2.22624	260.459	136.563	107.587	99.7491	196.186	102.964	1.01208	-3.28098	0.339142	-3.62012	ARMC8	-	-
chr19:4911777-4911939:mpeak_41919|chr19_4903091_4960667_UHRF1_NM_+|	267.754	-2.90865	0.547601	-5.31162	1.08658e-07	3.6735e-05	3.40469	13.7622	6.83094	20.5668	27.6184	13.3574	777.972	624.59	970.847	276.624	247.614	229.859	1.01111	-1.35869	1.65414	-3.01283	UHRF1	chr19:4911921:+	chr19_4911908_+
chr9:139758270-139758330:mpeak_88139|chr9_139756948_139760788_EDF1_NM_-|	373.811	-1.62181	0.486978	-3.33035	0.000867381	0.0123545	15.3211	5.29314	5.1232	18.5102	15.2378	17.2534	771.162	757.977	1021.23	586.155	641.891	630.583	1.00917	-0.986665	0.456465	-1.44313	EDF1	-	chr9_136863867_-
chr2:204110556-204110614:mpeak_51174|chr2_204103163_204161480_CYP20A1_NM_+|	102.284	-2.8246	1.29345	-2.18377	0.0289789	0.117449	1.70234	0	0	4.11337	0.95236	6.12216	132.783	187.377	186.143	216.98	241.899	249.339	1.00869	-2.71634	-0.484194	-2.23215	CYP20A1	-	-
chr7:130327069-130327176:mpeak_80015|chr7_130146647_130353598_COPG2_NM_-|	108.464	-2.56619	0.878804	-2.9201	0.0034992	0.0297407	0	5.29314	0.853867	1.02834	7.61888	6.12216	190.663	348.288	380.825	125.458	135.235	100.181	1.00247	-1.26465	1.34979	-2.61444	COPG2	chr7:130327067:-;chr7:130327115:-;chr7:130327166:-	chr7_130642199_-;chr7_130642243_-;chr7_130642297_-
chr5:132406063-132406146:mpeak_70000|chr5_132387661_132439924_HSPA4_NM_+|	178.02	-1.84629	0.830855	-2.22216	0.0262724	0.109333	3.40469	4.23451	0	14.3968	1.90472	5.00904	342.171	478.5	330.447	298.219	339.04	318.909	0.99545	-1.48007	0.267699	-1.74777	HSPA4	-	chr5_133070436_+
chr5:148878391-148878454:mpeak_70797|chr5_148876423_148931115_CSNK1A1_NM_-|	161.015	-3.3726	0.756168	-4.46012	8.1913e-06	0.000635164	3.40469	3.17588	0	9.25508	23.809	17.8099	303.017	357.816	333.862	266.341	327.612	286.072	0.99235	-2.95064	0.176712	-3.12736	CSNK1A1	chr5:148878402:-	chr5_149498840_-
chr3:12637301-12637442:mpeak_57777|chr3_12626156_12705700_RAF1_NM_-|	135.513	-3.1507	0.950983	-3.3131	0.00092267	0.0128448	0	3.17588	0	7.19839	7.61888	5.5656	354.088	314.412	292.023	169.676	238.09	234.312	0.991923	-2.68213	0.58107	-3.2632	RAF1	-	chr3_12595800_-
chr14:24456877-24456948:mpeak_25154|chr14_24439082_24475094_DHRS4L2_NM_+|	111.814	-2.45913	1.10716	-2.22112	0.0263427	0.109571	0	2.11725	0	1.02834	4.7618	6.12216	209.388	207.491	223.713	220.065	233.328	233.755	0.991545	-2.49219	-0.101215	-2.39097	DHRS4L2	chr14:24456929:+	chr14_23987685_+;chr14_23987739_+
chr17:1451582-1451635:mpeak_35259|chr17_1423832_1466110_PITPNA_NM_-|	236.235	-1.84467	0.704705	-2.61765	0.00885371	0.0548618	10.2141	0	0.853867	9.25508	1.90472	7.79184	565.179	566.366	543.06	361.976	384.754	383.47	0.991393	-0.775936	0.567242	-1.34318	PITPNA	-	-
chr1:193020894-193020954:mpeak_7290|chr1_192989586_193029237_UCHL5_NR_-mpeak_7290|chr1_192985525_193028523_UCHL5_NM_-||	111.421	-3.46754	1.37492	-2.522	0.0116691	0.0657254	1.70234	0	0	14.3968	1.90472	5.5656	180.449	239.25	96.487	255.029	292.375	249.896	0.98938	-3.68317	-0.627231	-3.05594	UCHL5	-	chr1_193051816_-
chr5:140957847-140957921:mpeak_70604|chr5_140896575_140998622_DIAPH1_NM_-|	393.626	-1.31672	0.486516	-2.70643	0.00680117	0.0458302	6.80938	8.46902	16.2235	17.4818	11.4283	10.5746	1026.51	876.543	1283.36	474.066	473.323	518.714	0.988629	-0.325859	1.11995	-1.44581	DIAPH1	-	-
chr1:171462577-171462628:mpeak_6641|chr1_171454665_171560725_PRRC2C_NM_+|	191.929	-3.50108	1.07988	-3.24211	0.00118647	0.0147906	5.10703	0	0	5.14171	1.90472	10.5746	517.513	732.57	299.707	230.349	254.28	246	0.988592	-1.78674	1.08486	-2.87161	PRRC2C	-	-
chr20:40132977-40133116:mpeak_53571|chr20_40034129_40247133_CHD6_NM_-|	33.9997	-4.13125	1.40388	-2.94273	0.00325328	0.0284899	0	0	0.853867	5.14171	0.95236	5.00904	108.95	107.98	42.6934	47.3037	52.3798	36.733	0.986661	-3.70081	0.928402	-4.62921	CHD6	-	-
chr6:151256002-151256056:mpeak_75931|chr6_151186814_151422661_MTHFD1L_NM_+|	97.2401	-3.76111	0.858425	-4.38141	1.17915e-05	0.000775586	1.70234	4.23451	0	3.08503	11.4283	5.5656	340.469	210.667	353.501	76.0973	86.6648	73.466	0.984404	-1.75791	1.93716	-3.69507	MTHFD1L	-	-
chr1:46766886-46767031:mpeak_2418|chr1_46744756_46769038_LRRC41_NM_-|	116.832	-4.19484	1.17031	-3.5844	0.000337859	0.00696483	3.40469	0	0	4.11337	7.61888	2.7828	321.743	238.191	479.02	102.834	120.95	121.33	0.983111	-2.09195	1.58999	-3.68194	LRRC41	-	chr1_46301217_-
chr16:106528-106596:mpeak_31289|chr16_103828_107085_SNRNP25_NM_+mpeak_31289|chr16_103828_107085_SNRNP25_NM_+||	133.769	-2.3565	1.15131	-2.04681	0.0406769	0.147681	0	0	2.5616	14.3968	2.85708	1.11312	282.589	218.077	281.776	242.689	314.279	244.887	0.982156	-2.842	-0.0353545	-2.80664	SNRNP25	-	chr16_56598_+
chr2:100007115-100007175:mpeak_48540|chr2_99953833_100015769_EIF5B_NM_+|	235.3	-1.66861	0.762277	-2.18898	0.0285981	0.116152	5.10703	4.23451	1.70773	21.5952	5.71416	19.4796	316.636	514.493	297.146	395.912	623.796	617.782	0.979307	-2.08222	-0.537367	-1.54485	EIF5B	chr2:100007168:+	chr2_99390702_+
chr6:15249981-15250043:mpeak_72234|chr6_15246205_15520299_JARID2_NM_+|	174.795	-2.40538	0.704732	-3.41319	0.000642074	0.010087	3.40469	4.23451	0	7.19839	13.333	7.23528	372.814	421.334	377.409	289.992	316.184	284.402	0.978083	-1.86186	0.395612	-2.25748	JARID2	chr6:15250042:+	chr6_15249810_+
chr12:30784818-30784879:mpeak_18513|chr12_30783891_30848929_IPO8_NM_-|	79.0844	-2.96455	0.939508	-3.15543	0.00160261	0.0180603	1.70234	0	1.70773	8.22673	6.66652	5.5656	168.532	175.732	179.312	140.883	143.806	116.878	0.976958	-2.58485	0.38276	-2.96761	IPO8	-	chr12_30631940_-
chr17:27612971-27613065:mpeak_36709|chr17_27591609_27621166_NUFIP2_NM_-|	199.859	-1.79902	0.883265	-2.03678	0.0416718	0.150196	1.70234	3.17588	0	19.5385	4.7618	10.0181	284.292	272.067	192.974	510.057	498.084	601.642	0.976514	-2.81455	-1.10319	-1.71136	NUFIP2	chr17:27612991:-	chr17_29285970_-
chr9:124353534-124353585:mpeak_87122|chr9_124329380_124545814_DAB2IP_NM_+|	212.809	-2.83589	0.966782	-2.93333	0.00335343	0.0290104	5.10703	0	0	5.14171	2.85708	6.12216	422.182	569.542	584.899	273.539	354.278	330.04	0.971768	-1.46728	0.718955	-2.18623	DAB2IP	-	-
chr20:61565229-61565333:mpeak_54686|chr20_61513766_61569304_DIDO1_NM_-|	68.4026	-3.6608	0.959382	-3.81579	0.000135746	0.00401163	1.70234	3.17588	0.853867	13.3684	7.61888	3.89592	297.91	186.318	107.587	79.1823	68.5699	50.647	0.96856	-2.11804	1.57674	-3.69478	DIDO1	-	-
chr22:41650419-41650511:mpeak_57028|chr22_41642676_41682255_RANGAP1_NM_-|	896.426	-1.26497	0.641127	-1.97303	0.0484916	0.166538	44.261	9.52765	11.9541	37.0203	29.5232	17.8099	1882.79	2373.44	2535.99	1200.07	1519.97	1094.75	0.967912	-0.359614	0.832278	-1.19189	RANGAP1	chr22:41650446:-	-
chr1:220968207-220968268:mpeak_8284|chr1_220960038_220986633_MARC1_NM_+|	77.6674	-4.39843	1.28187	-3.43126	0.000600792	0.00976519	1.70234	0	0	8.22673	5.71416	5.5656	223.007	173.615	131.496	141.911	119.997	120.774	0.967026	-3.51836	0.464713	-3.98307	MARC1	-	chr1_220794912_+
chr8:140829180-140829239:mpeak_84148|chr8_140743471_141468678_TRAPPC9_NM_-|	169.53	-3.24617	0.737328	-4.40261	1.06955e-05	0.000747096	5.10703	4.23451	0	8.22673	11.4283	8.90496	408.563	391.692	649.793	184.073	207.615	154.724	0.966335	-1.61226	1.40804	-3.02031	TRAPPC9	-	-
chr3:25671797-25671847:mpeak_58154|chr3_25639968_25705863_TOP2B_NM_-|	217.5	-1.82373	0.84905	-2.14797	0.0317165	0.125032	5.10703	3.17588	0	12.3401	1.90472	10.0181	439.205	534.607	315.077	323.928	454.276	510.366	0.96396	-1.55054	0.000357849	-1.5509	TOP2B	-	-
chr14:52458028-52458161:mpeak_25918|chr14_52456227_52471079_C14orf166_NM_+|	456.207	-1.31808	0.469531	-2.80722	0.00499708	0.0375092	6.80938	9.52765	13.6619	24.6802	19.9996	14.4706	926.076	1179.31	1007.56	618.033	859.029	795.325	0.963681	-0.979476	0.454074	-1.43355	C14orf166	-	chr14_51991360_+
chr14:34998611-34998718:mpeak_25417|chr14_34985792_35008943_EAPP_NM_-|	67.1403	-2.56781	0.977459	-2.62703	0.00861339	0.0535691	0	2.11725	0.853867	4.11337	2.85708	6.12216	151.509	161.97	149.427	90.4941	130.473	105.746	0.962763	-2.13967	0.50269	-2.64236	EAPP	-	-
chr12:80061242-80061305:mpeak_20688|chr12_79986473_80084790_PAWR_NM_-|	106.95	-3.23582	0.983456	-3.29026	0.00100097	0.0134716	3.40469	1.05863	0	10.2834	11.4283	5.00904	214.495	284.771	197.243	174.818	236.185	144.706	0.961218	-2.58177	0.325813	-2.90759	PAWR	chr12:80061247:-	chr12_79667473_-
chr1:28948417-28948467:mpeak_1463|chr1_28930086_28969604_TAF12_NM_-|	71.4793	-2.76387	1.14059	-2.4232	0.0153847	0.0781437	1.70234	1.05863	0	8.22673	2.85708	3.89592	156.616	141.856	134.911	99.7491	143.806	163.072	0.955612	-2.43976	0.0919336	-2.5317	TAF12	-	-
chr5:175875427-175875480:mpeak_71395|chr5_175875355_175933768_FAF2_NM_+|	158.14	-3.30156	1.09192	-3.02363	0.00249759	0.0240155	3.40469	0	0	7.19839	5.71416	4.45248	371.111	314.412	384.24	285.879	255.233	266.036	0.954797	-2.35059	0.406388	-2.75698	FAF2	-	-
chr17:78076476-78076535:mpeak_39797|chr17_78075354_78093070_GAA_NM_+|	112.926	-2.77276	0.762358	-3.63709	0.00027574	0.00614921	1.70234	2.11725	5.97707	6.17005	11.4283	4.45248	321.743	222.312	482.435	112.089	96.1884	88.4931	0.954385	-1.17047	1.7903	-2.96077	GAA	chr17:78076532:+	-
chr1:109951692-109951851:mpeak_3994|chr1_109944712_109969108_PSMA5_NM_-|	281.081	-1.46512	0.577398	-2.53746	0.0111661	0.0640269	1.70234	7.41039	11.9541	12.3401	3.80944	15.0271	711.58	712.456	788.973	312.616	426.657	368.443	0.951956	-0.56549	0.998422	-1.56391	PSMA5	-	-
chr6:155129196-155129347:mpeak_76150|chr6_155054511_155153072_SCAF8_NM_+|	112.773	-2.96103	0.853926	-3.46755	0.000525233	0.00895015	0	4.23451	0.853867	10.2834	7.61888	9.46152	263.863	366.285	176.751	143.968	215.233	154.724	0.945913	-2.42699	0.65083	-3.07782	SCAF8	-	-
chr5:32599060-32599167:mpeak_67489|chr5_32585604_32601110_SUB1_NM_+|	592.507	-1.60613	0.600915	-2.67281	0.0075218	0.0490542	17.0234	2.11725	8.53867	55.5305	20.9519	31.1674	909.052	996.168	1027.2	1133.23	1497.11	1411.99	0.943908	-1.95946	-0.463096	-1.49637	SUB1	chr5:32599176:+	chr5_32598966_+;chr5_32598996_+;chr5_32599022_+
chr17:80478545-80478601:mpeak_40046|chr17_80477593_80559178_FOXK2_NM_+|	181.248	-1.7234	0.707618	-2.4355	0.0148711	0.0766345	0	3.17588	5.1232	12.3401	3.80944	5.00904	384.73	394.868	539.644	230.349	300.946	294.977	0.94362	-1.35022	0.675022	-2.02524	FOXK2	chr17:80478597:+	chr17_82520720_+
chr3:12628259-12628404:mpeak_57776|chr3_12626156_12705700_RAF1_NM_-|	135.23	-1.92084	0.830279	-2.31349	0.0206956	0.0939364	3.40469	0	2.5616	8.22673	0.95236	5.00904	354.088	314.412	292.023	169.676	238.09	234.312	0.931726	-1.24978	0.58107	-1.83085	RAF1	chr3:12628315:-	-
chr11:76503791-76503847:mpeak_16169|chr11_76493356_76506652_TSKU_NM_+|	164.176	-1.9948	0.606199	-3.29066	0.000999526	0.0134716	3.40469	1.05863	5.1232	14.3968	13.333	8.3484	371.111	313.354	344.962	300.276	291.422	303.325	0.931248	-1.91205	0.201845	-2.11389	TSKU	chr11:76503845:+	chr11_76792798_+
chr7:39736291-39736472:mpeak_77663|chr7_39663151_39745721_RALA_NM_+|	213.164	-2.5666	0.916035	-2.80186	0.00508088	0.0378357	0	3.17588	0	9.25508	5.71416	12.2443	313.231	349.347	369.725	490.519	519.989	484.764	0.92295	-3.0991	-0.534541	-2.56456	RALA	-	chr7_39696777_+
chr7:33037512-33037608:mpeak_77552|chr7_32997015_33044786_FKBP9_NM_+|	148.796	-3.53384	1.15941	-3.04795	0.00230409	0.0227815	3.40469	0	0	11.3118	1.90472	3.33936	439.205	280.536	391.071	200.527	203.805	250.452	0.919513	-2.28175	0.762525	-3.04427	FKBP9	chr7:33037603:+	-
chr14:31602706-31602881:mpeak_25313|chr14_31570273_31676729_HECTD1_NM_-|	131.481	-1.99695	0.824034	-2.42339	0.0153765	0.0781437	1.70234	3.17588	3.41547	16.4535	4.7618	4.45248	318.338	407.572	183.581	195.385	235.233	203.701	0.911905	-1.62987	0.519852	-2.14972	HECTD1	-	-
chr11:48044639-48044696:mpeak_14653|chr11_48002109_48188755_PTPRJ_NM_+|	62.2049	-3.22181	1.23456	-2.60969	0.0090624	0.0556733	1.70234	1.05863	0	2.05668	10.476	1.11312	194.067	133.387	128.934	110.033	85.7124	77.9184	0.907442	-2.30521	0.737859	-3.04306	PTPRJ	-	-
chr7:158529768-158529993:mpeak_80867|chr7_158526943_158622319_ESYT2_NM_-|	187.863	-1.36745	0.665058	-2.05613	0.0397695	0.145764	1.70234	5.29314	4.26934	10.2834	13.333	2.7828	428.991	393.809	422.664	279.709	331.421	360.094	0.904467	-1.22867	0.358807	-1.58748	ESYT2	chr7:158529901:-;chr7:158529929:-	chr7_158737238_-;chr7_158737266_-
chr2:159491457-159491513:mpeak_49912|chr2_159313391_159536940_PKP4_NM_+|	138.458	-2.2746	1.12501	-2.02185	0.0431918	0.15413	0	2.11725	0	2.05668	3.80944	7.23528	282.589	220.194	201.513	352.721	294.279	294.977	0.901859	-2.62946	-0.41951	-2.20995	PKP4	chr2:159491516:+	-
chr9:136222923-136223014:mpeak_87926|chr9_136218837_136223361_SURF1_NM_-|	206.45	-1.82072	0.716781	-2.54014	0.0110808	0.0638411	3.40469	4.23451	3.41547	17.4818	18.0948	4.45248	320.041	436.154	475.604	356.835	444.752	392.932	0.897441	-1.85639	0.0443384	-1.90073	SURF1	chr9:136222960:-	chr9_133356107_-
chr22:32104989-32105040:mpeak_56632|chr22_32081789_32146120_PRR14L_NM_-|	100.493	-1.56496	0.762065	-2.05358	0.0400168	0.146468	1.70234	2.11725	2.5616	3.08503	2.85708	6.12216	226.412	256.188	228.836	151.166	179.044	145.819	0.896947	-0.91884	0.579686	-1.49853	PRR14L	-	-
chr21:40180549-40180639:mpeak_55336|chr21_40177230_40194597_ETS2_NM_+|	133.412	-1.87728	0.748728	-2.50729	0.0121659	0.0674715	5.10703	1.05863	2.5616	4.11337	4.7618	7.79184	262.161	318.647	396.194	175.846	245.709	176.986	0.893269	-0.933394	0.706911	-1.6403	ETS2	-	chr21_38808711_+
chr6:108222643-108222728:mpeak_74901|chr6_108193051_108279482_SEC63_NM_-|	182.589	-1.895	0.858314	-2.20782	0.027257	0.112394	0	2.11725	1.70773	12.3401	11.4283	13.914	180.449	293.24	172.481	438.074	573.321	491.999	0.887922	-3.30036	-1.21824	-2.08213	SEC63	-	chr6_107901440_-
chr14:68158087-68158168:mpeak_26672|chr14_68145140_68162510_RDH11_NM_-|	357.056	-1.21953	0.503908	-2.42015	0.0155143	0.0784719	11.9164	5.29314	3.41547	14.3968	8.57124	11.6878	830.744	756.919	735.18	581.013	670.462	655.071	0.887922	-0.748701	0.28493	-1.03363	RDH11	-	-
chr15:50757432-50757592:mpeak_29242|chr15_50716573_50791099_USP8_NM_+|	77.4483	-2.94185	1.09627	-2.68352	0.00728513	0.0480671	0	1.05863	0.853867	7.19839	6.66652	14.4706	100.438	110.097	113.564	170.705	202.853	201.475	0.885141	-3.88908	-0.827204	-3.06188	USP8	chr15:50757505:+	chr15_50465305_+
chr17:65733205-65733269:mpeak_39176|chr17_65713948_65739858_NOL11_NM_+|	438.495	-1.33	0.514627	-2.58439	0.00975525	0.0585592	15.3211	5.29314	5.97707	19.5385	7.61888	16.1402	1045.24	941.12	1026.35	627.288	841.886	710.171	0.882638	-0.703333	0.467166	-1.1705	NOL11	chr17:65733261:+	chr17_67737176_+
chr16:88819310-88819372:mpeak_34912|chr16_88782262_88851372_PIEZO1_NM_-|	264.459	-2.89677	0.980786	-2.95352	0.00314174	0.0278052	6.80938	0	0	4.11337	0	7.23528	783.079	564.248	979.386	259.142	276.184	293.307	0.877983	-0.736925	1.48949	-2.22641	PIEZO1	-	-
chr4:143296197-143296265:mpeak_66158|chr4_142950067_143767604_INPP4B_NM_-|	56.6884	-3.0114	1.10518	-2.72481	0.00643384	0.0440604	0	1.05863	0.853867	7.19839	6.66652	5.00904	120.866	113.273	93.0715	117.231	107.617	107.416	0.876725	-3.30287	-0.0221071	-3.28076	INPP4B	-	-
chr12:116620158-116620364:mpeak_21854|chr12_116399203_116714991_MED13L_NM_-|	311.921	-2.04219	0.829968	-2.46057	0.0138718	0.0732779	0	4.23451	0	11.3118	8.57124	8.90496	480.061	556.838	416.687	723.953	674.271	858.216	0.873944	-2.7652	-0.634431	-2.13077	MED13L	-	-
chr5:43654530-43654591:mpeak_67864|chr5_43602790_43704356_NNT_NM_+|	175.993	-1.71778	0.746587	-2.30085	0.0214001	0.0955486	3.40469	0	5.1232	2.05668	4.7618	5.00904	517.513	575.893	371.432	203.612	233.328	189.787	0.87326	-0.471887	1.22483	-1.69672	NNT	chr5:43654585:+	chr5_43654501_+
chr12:67691521-67691627:mpeak_20274|chr12_67663060_67706385_CAND1_NM_+|	415.244	-2.67179	0.860024	-3.10665	0.00189222	0.0201948	10.2141	0	0	9.25508	5.71416	4.45248	1331.23	1418.56	774.458	408.252	530.465	490.33	0.869467	-0.927113	1.30226	-2.22938	CAND1	-	-
chr10:121285540-121285627:mpeak_12890|chr10_121259771_121302222_RGS10_NM_-|	150.901	-1.67541	0.726027	-2.30765	0.0210187	0.0947469	5.10703	1.05863	1.70773	8.22673	6.66652	6.12216	258.756	327.116	322.762	263.255	322.85	287.185	0.866509	-1.41639	0.0572376	-1.47363	RGS10	-	-
chr11:66799088-66799161:mpeak_15548|chr11_66790189_66816054_SYT12_NM_+|	135.653	-1.68336	0.730184	-2.30539	0.021145	0.0950626	3.40469	3.17588	0.853867	7.19839	8.57124	3.89592	251.947	304.885	304.831	246.802	239.042	253.235	0.862802	-1.40338	0.221393	-1.62477	SYT12	chr11:66799152:+	chr11_67031680_+
chr1:31454446-31454507:mpeak_1522|chr1_31406189_31538564_PUM1_NM_-|	256.073	-2.686	0.604718	-4.44173	8.92374e-06	0.000659084	3.40469	8.46902	0	7.19839	15.2378	11.1312	728.604	642.587	693.34	295.134	317.136	350.633	0.862693	-1.49929	1.10035	-2.59964	PUM1	-	-
chr11:31467777-31467883:mpeak_14176|chr11_31454115_31531175_IMMP1L_NM_-|	84.2155	-3.39963	1.03293	-3.29124	0.000997462	0.0134716	0	2.11725	0.853867	20.5668	7.61888	4.45248	171.937	138.68	206.636	151.166	145.711	160.846	0.861606	-3.45748	0.176394	-3.63388	IMMP1L	-	chr11_31446260_-
chr3:158362983-158363113:mpeak_61793|chr3_158362316_158409124_GFM1_NM_+|	217	-1.95804	0.710198	-2.75704	0.00583272	0.0416369	3.40469	5.29314	0	4.11337	11.4283	6.12216	476.657	521.903	516.59	292.049	359.04	407.402	0.861086	-1.31656	0.517451	-1.83401	GFM1	-	-
chr1:204051462-204051534:mpeak_7681|chr1_204042245_204094985_SOX13_NM_+|	91.738	-2.33988	0.845295	-2.76813	0.00563794	0.0405203	3.40469	1.05863	1.70773	4.11337	5.71416	4.45248	190.663	214.901	313.369	99.7491	140.949	120.774	0.858362	-1.21041	0.991974	-2.20238	SOX13	-	chr1_204082401_+
chr14:103409817-103409905:mpeak_28074|chr14_103400180_103523742_CDC42BPB_NM_-|	121.462	-2.64741	0.710581	-3.7257	0.000194776	0.00506538	0	1.05863	4.26934	7.19839	8.57124	6.67872	325.148	295.357	311.662	167.62	161.901	168.081	0.857352	-2.07495	0.905595	-2.98055	CDC42BPB	chr14:103409818:-;chr14:103409855:-	-
chr5:445025-445116:mpeak_67020|chr5_443333_466841_EXOC3_NM_+|	134.006	-2.65139	0.867556	-3.05616	0.00224193	0.0223517	3.40469	2.11725	0	7.19839	2.85708	7.23528	331.957	265.715	373.994	208.753	229.519	175.316	0.852444	-1.64675	0.66319	-2.30994	EXOC3	-	-
chr12:131357311-131357455:mpeak_22596|chr12_131356538_131360426_RAN_NM_+|	3137.11	-0.99722	0.403159	-2.47351	0.0133792	0.0714705	80.0102	52.9314	55.5014	121.344	58.094	73.466	6795.76	7037.75	8332.04	4428.04	5357.03	5253.37	0.850161	-0.424463	0.559665	-0.984128	RAN	-	chr12_130872864_+;chr12_130872910_+
chr20:20005467-20005617:mpeak_52909|chr20_19997933_20013745_NAA20_NM_+|	275.189	-1.83904	0.772596	-2.38034	0.0172967	0.0841287	5.10703	0	4.26934	3.08503	8.57124	17.2534	500.489	570.6	586.607	412.365	639.034	554.891	0.84844	-1.62445	0.0454481	-1.6699	NAA20	-	-
chr16:18809230-18809305:mpeak_32382|chr16_18804692_18812857_ARL6IP1_NM_-|	554.563	-1.10857	0.449431	-2.4666	0.0136404	0.0724628	10.2141	10.5863	11.1003	20.5668	17.1425	15.0271	1545.73	1163.43	1051.96	869.977	976.169	962.849	0.848167	-0.725216	0.42111	-1.14633	ARL6IP1	chr16:18809234:-	chr16_18797910_-;chr16_18797961_-
chr19:10286225-10286302:mpeak_42238|chr19_10244377_10305755_DNMT1_NM_-|	874.853	-1.4437	0.5845	-2.46997	0.0135123	0.0719636	44.261	13.7622	20.4928	6.17005	6.66652	11.1312	3956.25	2707.97	2599.17	333.183	455.228	343.954	0.847594	1.71189	3.0322	-1.32031	DNMT1	-	-
chr9:2045969-2046071:mpeak_84635|chr9_2015218_2192703_SMARCA2_NM_+|	121.757	-3.46106	1.04825	-3.30174	0.000960855	0.0130986	0	0	2.5616	6.17005	9.5236	5.5656	279.185	455.21	174.189	173.79	192.377	162.516	0.845801	-3.05297	0.781218	-3.83419	SMARCA2	chr9:2046021:+;chr9:2046063:+	chr9_2046024_+;chr9_2046062_+
chr3:119762212-119762270:mpeak_60370|chr3_119545702_119813264_GSK3B_NM_-|	121.478	-3.1615	1.39622	-2.26434	0.0235534	0.102225	1.70234	0	0	1.02834	1.90472	10.5746	190.663	274.184	142.596	267.369	336.183	231.529	0.840743	-2.98819	-0.459167	-2.52902	GSK3B	-	-
chr11:44139246-44139296:mpeak_14440|chr11_44117098_44265698_EXT2_NM_+|	132.197	-1.6514	0.764215	-2.16091	0.030702	0.12246	3.40469	1.05863	5.1232	3.08503	1.90472	5.5656	291.101	406.513	445.719	142.939	171.425	108.529	0.838472	-0.138895	1.43488	-1.57377	EXT2	chr11:44139298:+	chr11_44117746_+
chr5:134074429-134074487:mpeak_70102|chr5_134074169_134086448_CAMLG_NM_+|	292.67	-1.22041	0.55612	-2.19451	0.0281986	0.114971	6.80938	2.11725	4.26934	12.3401	13.333	9.46152	497.085	514.493	565.26	576.9	657.129	652.845	0.836863	-1.4128	-0.258963	-1.15383	CAMLG	-	chr5_134738792_+
chr5:148883182-148883236:mpeak_70798|chr5_148876423_148931115_CSNK1A1_NM_-|	158.441	-1.96995	0.73536	-2.6789	0.00738646	0.0485461	0	2.11725	3.41547	5.14171	4.7618	11.1312	303.017	357.816	333.862	266.341	327.612	286.072	0.834334	-1.92671	0.176712	-2.10342	CSNK1A1	chr5:148883183:-	chr5_149503621_-
chr5:179671353-179671516:mpeak_71725|chr5_179663531_179719071_MAPK9_NM_-|	84.509	-3.39283	1.12529	-3.01506	0.00256928	0.0243995	1.70234	0	0.853867	12.3401	9.5236	6.12216	205.984	145.032	109.295	168.648	174.282	180.326	0.832985	-3.45262	-0.184908	-3.26771	MAPK9	-	chr5_180244353_-
chr12:102120155-102120217:mpeak_21174|chr12_102091416_102122678_CHPT1_NM_+|	256.006	-2.56145	1.20265	-2.12984	0.0331851	0.128726	5.10703	0	0	2.05668	0	10.5746	481.764	570.6	791.535	311.588	392.372	506.47	0.830908	-1.30645	0.60724	-1.91369	CHPT1	-	chr12_101726439_+
chr10:33208839-33209021:mpeak_10205|chr10_33190563_33247293_ITGB1_NM_-|	289.348	-1.91179	0.589308	-3.24414	0.00117807	0.0147512	6.80938	7.41039	2.5616	11.3118	6.66652	19.4796	669.022	764.329	620.762	392.827	499.037	471.963	0.816965	-1.15841	0.590855	-1.74926	ITGB1	-	-
chr19:34710602-34710777:mpeak_43487|chr19_34663351_34718269_LSM14A_NM_+|	135.646	-1.69058	0.801657	-2.10886	0.0349571	0.132492	1.70234	4.23451	0.853867	5.14171	2.85708	10.5746	366.004	235.015	230.544	244.745	276.184	249.896	0.816621	-1.4516	0.109423	-1.56103	LSM14A	-	chr19_34219719_+;chr19_34219773_+;chr19_34219813_+;chr19_34219872_+
chr16:67116109-67116213:mpeak_33765|chr16_67063049_67132612_CBFB_NM_+|	194.702	-1.81784	0.797315	-2.27995	0.0226107	0.0994307	3.40469	1.05863	4.26934	22.6235	9.5236	5.00904	282.589	453.093	334.716	336.268	451.419	432.447	0.815833	-2.08911	-0.188892	-1.90022	CBFB	-	chr16_67082254_+
chr3:13389960-13390068:mpeak_57813|chr3_13359281_13461819_NUP210_NM_-|	1188.84	-1.26113	0.390618	-3.22856	0.00124415	0.0152842	32.3446	29.6416	35.0086	14.3968	10.476	17.8099	4393.75	3754.95	3740.79	602.608	802.84	831.501	0.815801	1.18426	2.41008	-1.22583	NUP210	chr3:13389961:-;chr3:13389987:-	chr3_13348426_-;chr3_13348466_-
chr7:75312472-75312530:mpeak_78526|chr7_75167545_75368290_HIP1_NM_-|	98.1815	-3.10562	1.12722	-2.75512	0.00586713	0.0417415	0	0	1.70773	4.11337	4.7618	6.67872	270.673	183.143	174.189	195.385	166.663	170.864	0.815791	-3.18712	0.236877	-3.424	HIP1	-	-
chr14:61444281-61444361:mpeak_26374|chr14_61441912_61447797_TRMT5_NM_-|	134.759	-2.94334	1.29609	-2.27094	0.0231506	0.101058	1.70234	0	0	1.02834	2.85708	8.90496	202.579	188.436	236.521	288.964	330.469	355.642	0.813823	-2.90946	-0.635815	-2.27365	TRMT5	-	-
chr22:35818140-35818267:mpeak_56700|chr22_35796115_35820146_MCM5_NM_+|	570.246	-3.47988	0.793459	-4.3857	1.15611e-05	0.000769405	13.6188	0	0	10.2834	15.2378	12.8009	1484.44	1382.57	2178.22	562.503	679.033	504.244	0.8098	-1.49258	1.53105	-3.02363	MCM5	-	-
chr10:104131760-104131818:mpeak_12338|chr10_104005254_104141812_GBF1_NM_+|	205.238	-2.72824	0.690904	-3.9488	7.85444e-05	0.00292448	1.70234	8.46902	0	4.11337	7.61888	6.67872	585.607	727.277	587.461	167.62	210.472	155.837	0.802857	-0.856053	1.83154	-2.6876	GBF1	-	-
chr4:106390693-106390801:mpeak_65471|chr4_106290910_106395227_PPA2_NM_-|	278.406	-1.50817	0.73011	-2.06567	0.0388598	0.143237	3.40469	7.41039	0	3.08503	7.61888	7.23528	623.058	597.066	800.928	314.673	506.656	469.737	0.802682	-0.73007	0.646545	-1.37661	PPA2	chr4:106390696:-;chr4:106390726:-;chr4:106390788:-	chr4_105469539_-
chr4:896644-896754:mpeak_63163|chr4_843562_926178_GAK_NM_-|	335.994	-3.2903	0.599523	-5.48819	4.06073e-08	1.63435e-05	5.10703	3.17588	16.2235	24.6802	28.5708	21.1493	743.925	894.54	1419.13	267.369	318.088	289.968	0.801493	-1.60215	1.80434	-3.40649	GAK	chr4:896648:-;chr4:896699:-	chr4_902863_-
chr20:49566026-49566161:mpeak_54165|chr20_49551773_49575060_DPM1_NM_-|	210.089	-2.48756	1.13664	-2.18852	0.0286316	0.116231	3.40469	0	0	0	3.80944	6.67872	449.419	449.917	382.533	343.466	473.323	408.515	0.796811	-1.62317	0.0651078	-1.68827	DPM1	-	chr20_50949499_-
chr19:11169735-11169893:mpeak_42353|chr19_11071597_11172459_SMARCA4_NM_+|	503.419	-1.13426	0.525408	-2.15882	0.0308642	0.122991	11.9164	17.9967	9.39254	1.02834	11.4283	5.5656	1821.51	1407.97	1712.86	332.154	355.23	353.972	0.795283	1.12496	2.24673	-1.12177	SMARCA4	chr19:11169892:+	-
chr4:6710885-6711207:mpeak_63486|chr4_6710370_6711606_MRFAP1L1_NM_-|	341.413	-2.00105	0.583916	-3.42695	0.000610403	0.00984567	8.51172	6.35176	0.853867	25.7085	9.5236	21.1493	670.724	697.635	610.515	709.556	625.701	710.727	0.794257	-1.84286	-0.0481147	-1.79475	MRFAP1L1	-	chr4_6709434_-
chr10:1061642-1061742:mpeak_9197|chr10_1034348_1063014_GTPBP4_NM_+|	692.13	-1.12443	0.419948	-2.67756	0.00741616	0.0485902	17.0234	12.7035	9.39254	18.5102	19.9996	16.1402	1714.26	1499.02	1716.27	1267.95	945.694	1068.6	0.793572	-0.482332	0.586778	-1.06911	GTPBP4	-	-
chr2:74080366-74080560:mpeak_47822|chr2_74056042_74089329_STAMBP_NM_+|	112.056	-2.82303	0.949579	-2.97293	0.00294969	0.0267498	0	2.11725	1.70773	4.11337	3.80944	15.0271	260.459	190.553	279.215	158.365	236.185	193.126	0.785713	-2.58496	0.313322	-2.89828	STAMBP	chr2:74080557:+	chr2_73853448_+
chr19:50374585-50374726:mpeak_44742|chr19_50373317_50381613_AKT1S1_NM_-|	221.297	-1.92156	0.809998	-2.3723	0.0176779	0.0853792	6.80938	0	0.853867	1.02834	9.5236	6.12216	401.753	526.138	536.229	398.997	401.896	366.217	0.785104	-1.12158	0.327094	-1.44868	AKT1S1	chr19:50374626:-;chr19:50374655:-	chr19_49871370_-;chr19_49871399_-
chr3:107776132-107776385:mpeak_60132|chr3_107766139_107809935_CD47_NM_-|	461.09	-1.14635	0.534848	-2.14332	0.0320873	0.126118	8.51172	6.35176	8.53867	21.5952	3.80944	16.6968	949.908	1068.15	977.678	787.71	840.934	843.189	0.781181	-0.847227	0.277332	-1.12456	CD47	-	chr3_108057386_-
chr6:128840069-128840131:mpeak_75378|chr6_128291425_128841819_PTPRK_NM_-|	222.296	-2.04991	0.731826	-2.8011	0.00509295	0.0378589	3.40469	5.29314	0	7.19839	5.71416	6.12216	519.215	653.173	499.512	252.972	390.468	324.475	0.780354	-1.12991	0.788538	-1.91844	PTPRK	chr6:128840071:-	chr6_128518927_-
chr9:95418777-95418836:mpeak_86111|chr9_95378339_95432547_IPPK_NM_-|	96.3309	-2.92298	1.01055	-2.89246	0.00382237	0.0313049	0	3.17588	0.853867	6.17005	9.5236	1.11312	253.649	183.143	338.985	92.5508	143.806	123	0.77917	-2.06028	1.11022	-3.17051	IPPK	-	-
chr11:18511825-18511874:mpeak_14008|chr11_18502182_18548503_TSG101_NM_-|	130.048	-2.37138	0.872283	-2.71859	0.00655603	0.0445789	1.70234	3.17588	0	9.25508	2.85708	3.33936	314.934	285.829	347.524	180.988	222.852	188.117	0.771638	-1.66332	0.67983	-2.34315	TSG101	-	-
chr19:54622136-54622194:mpeak_45161|chr19_54618789_54634737_PRPF31_NM_+|	134.877	-2.14276	0.880706	-2.433	0.0149743	0.0769381	1.70234	3.17588	0	7.19839	2.85708	3.89592	255.352	345.113	349.232	191.272	239.995	218.728	0.770493	-1.51598	0.547038	-2.06302	PRPF31	chr19:54622189:+	chr19_54118813_+
chr22:19495325-19495397:mpeak_56024|chr22_19467348_19508003_CDC45_NM_+|	184.874	-2.11009	0.6476	-3.25833	0.0011207	0.0142868	5.10703	4.23451	2.5616	6.17005	3.80944	8.90496	476.657	441.448	630.154	197.442	210.472	231.529	0.768809	-0.665856	1.27576	-1.94162	CDC45	chr22:19495396:+	chr22_19507872_+
chr17:17588310-17588367:mpeak_36235|chr17_17584786_17713283_RAI1_NM_+|	298.146	-1.77224	0.56191	-3.15395	0.00161075	0.0181038	10.2141	9.52765	0.853867	7.19839	7.61888	5.5656	839.256	952.765	889.73	264.284	308.565	282.176	0.76799	0.0149773	1.64914	-1.63416	RAI1	chr17:17588364:+	chr17_17684998_+;chr17_17685049_+
chr1:36752717-36752877:mpeak_1853|chr1_36690016_36769396_THRAP3_NM_+|	295.818	-1.77269	0.704626	-2.51579	0.0118767	0.0664783	3.40469	1.05863	17.0773	6.17005	8.57124	5.5656	927.778	795.029	1092.1	195.385	239.995	257.687	0.765236	0.0850932	2.02202	-1.93693	THRAP3	-	chr1_36287165_+
chr19:1591369-1591525:mpeak_41669|chr19_1578157_1592760_MBD3_NM_-|	204.205	-1.49988	0.716152	-2.09435	0.0362285	0.136212	5.10703	3.17588	0.853867	12.3401	2.85708	7.79184	389.837	460.503	345.816	442.187	430.467	349.52	0.763845	-1.33119	-0.0310434	-1.30014	MBD3	-	-
chr2:61564099-61564206:mpeak_47345|chr2_61415844_61697849_USP34_NM_-|	79.2061	-3.09992	1.37095	-2.26115	0.0237503	0.102679	0	1.05863	0	10.2834	0	3.33936	141.295	178.908	101.61	139.854	197.139	176.986	0.752913	-3.68575	-0.285107	-3.40065	USP34	-	-
chr1:16920094-16920227:mpeak_766|chr1_16890681_16940100_NBPF1_NM_-|	191.603	-1.94145	0.83747	-2.31824	0.0204365	0.0933711	1.70234	0	5.97707	12.3401	2.85708	2.22624	634.975	479.558	415.833	262.227	239.995	241.547	0.752704	-1.18196	1.04095	-2.22291	NBPF1	chr1:16920150:-	-
chr5:16775727-16775780:mpeak_67382|chr5_16666902_16936385_MYO10_NM_-|	110.901	-2.21206	0.751772	-2.94246	0.00325618	0.0284899	1.70234	2.11725	2.5616	3.08503	5.71416	6.67872	331.957	275.243	250.183	161.45	134.283	155.837	0.744265	-1.27831	0.924993	-2.2033	MYO10	-	-
chr12:123247412-123247524:mpeak_22328|chr12_123237367_123253580_DENR_NM_+mpeak_22328|chr12_123237367_123253580_DENR_NM_+||	316.434	-1.91871	0.837782	-2.29022	0.0220083	0.0975429	3.40469	3.17588	0	19.5385	5.71416	13.914	389.837	612.945	326.177	796.965	835.22	790.316	0.742751	-2.57334	-0.8662	-1.70714	DENR	chr12:123247476:+;chr12:123247517:+	chr12_122762892_+;chr12_122762929_+;chr12_122762969_+
chr8:100897945-100898007:mpeak_83182|chr8_100890493_100906242_COX6C_NM_-|	1615.57	-1.06506	0.437505	-2.43439	0.014917	0.0767833	37.4516	22.2312	15.3696	40.1053	57.1416	37.2895	3367.24	2836.06	3907.3	2516.35	3336.12	3214.14	0.742314	-0.842028	0.157234	-0.999262	COX6C	chr8:100897949:-	chr8_99885723_-
chr5:16703225-16703274:mpeak_67378|chr5_16666902_16936385_MYO10_NM_-|	110.096	-3.28025	1.13565	-2.88843	0.00387176	0.0316787	0	2.11725	0	2.05668	1.90472	6.12216	331.957	275.243	250.183	161.45	134.283	155.837	0.740831	-2.25174	0.924993	-3.17673	MYO10	-	-
chr9:128264308-128264445:mpeak_87375|chr9_128201291_128469513_MAPKAP1_NM_-|	149.854	-3.14198	1.34728	-2.3321	0.0196957	0.0908172	1.70234	0	0	7.19839	10.476	1.11312	194.067	298.533	198.097	302.332	405.705	379.018	0.739403	-3.46418	-0.6543	-2.80988	MAPKAP1	-	-
chr1:62166517-62166617:mpeak_2803|chr1_62147022_62191095_TM2D1_NM_-|	97.92	-2.58713	1.19101	-2.17222	0.0298394	0.119982	1.70234	1.05863	0	2.05668	4.7618	6.67872	131.081	166.204	264.699	140.883	210.472	245.443	0.736935	-2.28941	-0.0867126	-2.2027	TM2D1	chr1:62166504:-;chr1:62166566:-	chr1_61700831_-;chr1_61700895_-
chr8:99057163-99057369:mpeak_83103|chr8_99054078_99057818_RPL30_NM_-|	4163.2	-1.14602	0.398925	-2.87276	0.00406897	0.0327533	78.3079	49.7555	74.2865	170.705	92.3789	94.0587	9965.53	8364.21	9156.87	6763.4	8216.96	6931.96	0.736176	-0.819648	0.326987	-1.14663	RPL30	chr8:99057170:-;chr8:99057221:-;chr8:99057246:-	chr8_98044942_-
chr9:139416744-139416814:mpeak_88100|chr9_139392010_139440238_NOTCH1_NM_-|	69.5645	-5.71919	1.36098	-4.20225	2.6427e-05	0.00138734	1.70234	0	0	0	8.57124	3.33936	299.613	236.074	159.673	45.247	37.142	43.4117	0.734445	-2.80665	2.46662	-5.27327	NOTCH1	chr9:139416759:-	chr9_136522287_-
chr12:125608770-125608831:mpeak_22577|chr12_125549924_125626637_AACS_NM_+|	173.926	-3.13346	0.854386	-3.6675	0.000244934	0.0056007	5.10703	2.11725	0	8.22673	5.71416	5.5656	405.158	403.337	683.094	180.988	238.09	149.715	0.726503	-1.43303	1.39087	-2.8239	AACS	chr12:125608830:+	-
chr15:89010377-89010457:mpeak_30845|chr15_89003094_89010633_MRPL46_NM_-|	131.686	-1.98987	0.799633	-2.48848	0.012829	0.0699123	3.40469	1.05863	1.70773	6.17005	1.90472	8.90496	277.482	279.478	295.438	210.81	279.042	214.832	0.723964	-1.46023	0.274551	-1.73478	MRPL46	-	-
chr1:8031267-8031323:mpeak_360|chr1_8021713_8044953_PARK7_NM_+|	629.979	-1.31748	0.406251	-3.24303	0.00118266	0.0147649	6.80938	10.5863	14.5157	13.3684	23.809	20.0362	1366.98	1538.19	1532.69	983.095	1079.02	970.641	0.719072	-0.842287	0.549233	-1.39152	PARK7	chr1:8031320:+	chr1_7971258_+
chr20:46329767-46329979:mpeak_53889|chr20_46287136_46415360_SULF2_NM_-|	550.096	-1.04846	0.504733	-2.07726	0.0377776	0.140783	11.9164	12.7035	5.97707	8.22673	11.4283	11.1312	1429.97	1126.38	1763.24	729.094	701.889	789.202	0.708332	-0.00889579	0.960212	-0.969108	SULF2	chr20:46329767:-;chr20:46329793:-;chr20:46329838:-	chr20_47701053_-;chr20_47701094_-
chr8:117864848-117864955:mpeak_83651|chr8_117859930_117887105_RAD21_NM_-|	522.01	-1.50782	0.645349	-2.33644	0.0194681	0.090112	11.9164	7.41039	0.853867	31.8786	11.4283	16.1402	840.958	1133.79	884.607	1149.69	1164.74	1010.71	0.705777	-1.55863	-0.217724	-1.34091	RAD21	-	chr8_116852609_-;chr8_116852665_-
chr7:745219-745269:mpeak_76559|chr7_590239_767313_PRKAR1B_NM_-|	132.959	-2.98248	1.19097	-2.50424	0.0122716	0.0679238	0	2.11725	0	4.11337	0	7.79184	250.245	299.592	351.793	211.838	290.47	177.543	0.704476	-2.49133	0.407316	-2.89864	PRKAR1B	chr7:745227:-	chr7_705574_-
chr20:47438201-47438277:mpeak_53956|chr20_47242465_47444420_PREX1_NM_-|	996.284	-1.8156	0.4794	-3.78723	0.000152335	0.00429178	20.4281	19.0553	22.2006	24.6802	29.5232	22.2624	3387.67	1754.15	3622.11	1007.77	971.407	1074.16	0.70384	-0.309918	1.52119	-1.8311	PREX1	chr20:47438198:-;chr20:47438225:-	chr20_48821678_-
chr1:120538624-120538832:mpeak_4695|chr1_120459317_120612317_NOTCH2_NM_-|	279.851	-3.37117	0.571489	-5.89893	3.65857e-09	2.67092e-06	10.2141	5.29314	3.41547	9.25508	12.3807	17.2534	1126.95	793.971	767.627	189.215	193.329	229.303	0.703825	-1.03925	2.13559	-3.17484	NOTCH2	-	-
chr21:37572157-37572217:mpeak_55244|chr21_37536838_37665617_DOPEY2_NM_+|	243.16	-1.81991	0.68693	-2.64933	0.00806504	0.0512139	1.70234	3.17588	11.1003	2.05668	12.3807	3.33936	766.055	816.202	690.779	215.952	207.615	187.561	0.702959	-0.153857	1.89508	-2.04893	DOPEY2	chr21:37572213:+	chr21_36199914_+
chr12:116636219-116636272:mpeak_21856|chr12_116399203_116714991_MED13L_NM_-|	310.939	-2.36373	1.10642	-2.13638	0.0326484	0.127457	3.40469	0	0	9.25508	1.90472	6.67872	480.061	556.838	416.687	723.953	674.271	858.216	0.702681	-2.3894	-0.634431	-1.75497	MED13L	-	-
chr6:152200372-152200593:mpeak_76056|chr6_152011630_152419866_ESR1_NM_+|	762.224	-1.88936	0.589418	-3.20547	0.00134843	0.016143	0	10.5863	0	16.4535	15.2378	11.1312	1581.48	1457.73	1482.31	1627.86	1472.35	1471.55	0.702392	-2.01617	-0.0159409	-2.00023	ESR1	-	-
chr12:56575025-56575102:mpeak_19779|chr12_56557549_56583351_SMARCC2_NM_-|	390.633	-1.85535	0.811754	-2.28561	0.0222771	0.0984244	13.6188	2.11725	0	1.02834	6.66652	8.3484	1174.62	1043.81	1156.99	391.798	426.657	461.945	0.699292	-0.0278978	1.39847	-1.42637	SMARCC2	chr12:56575044:-	chr12_56181244_-
chr7:26237768-26237914:mpeak_77327|chr7_26231958_26240413_HNRNPA2B1_NM_-mpeak_77327|chr7_26231958_26240413_HNRNPA2B1_NM_-||	298.427	-2.37343	0.843527	-2.8137	0.00489749	0.0371021	0	0	4.26934	15.4251	4.7618	6.67872	571.988	745.274	526.836	462.754	683.795	559.343	0.694541	-2.65368	0.112389	-2.76607	HNRNPA2B1	chr7:26237791:-	-
chr18:29100760-29100810:mpeak_40719|chr18_29078026_29125683_DSG2_NM_+|	191.551	-1.80975	0.866592	-2.08835	0.0367665	0.1375	3.40469	0	1.70773	4.11337	1.90472	8.90496	410.265	354.64	340.693	389.742	348.564	434.674	0.693619	-1.54546	-0.0853497	-1.46011	DSG2	-	-
chr17:681925-681974:mpeak_35195|chr17_663478_685571_GLOD4_NM_-|	213.845	-2.26717	0.674291	-3.36231	0.000772935	0.0115015	6.80938	2.11725	3.41547	12.3401	2.85708	7.79184	658.807	485.91	636.985	196.413	286.66	266.036	0.692714	-0.897357	1.25001	-2.14736	GLOD4	-	chr17_778740_-
chr17:65732810-65732875:mpeak_39175|chr17_65713948_65739858_NOL11_NM_+|	439.399	-2.06793	0.578349	-3.57558	0.000349454	0.00706121	8.51172	10.5863	1.70773	30.8503	12.3807	16.6968	1045.24	941.12	1026.35	627.288	841.886	710.171	0.690599	-1.52624	0.467166	-1.99341	NOL11	-	-
chr1:155288222-155288320:mpeak_5921|chr1_155278538_155290199_FDPS_NM_+|	467.339	-1.40945	0.506122	-2.78481	0.00535592	0.0390243	5.10703	12.7035	4.26934	21.5952	10.476	12.2443	1036.73	1000.4	1163.82	780.511	862.838	697.37	0.689792	-1.00508	0.451549	-1.45663	FDPS	chr1:155288305:+	chr1_155318512_+
chr5:140905615-140905756:mpeak_70599|chr5_140896575_140998622_DIAPH1_NM_-|	391.923	-1.56736	0.537281	-2.91721	0.00353177	0.0299103	10.2141	3.17588	8.53867	12.3401	5.71416	10.5746	1026.51	876.543	1283.36	474.066	473.323	518.714	0.68819	-0.384657	1.11995	-1.50461	DIAPH1	chr5:140905666:-	-
chr1:46126743-46126903:mpeak_2371|chr1_46094080_46152302_GPBP1L1_NM_-|	141.69	-1.88802	0.867843	-2.17553	0.0295904	0.119151	1.70234	1.05863	2.5616	16.4535	5.71416	2.7828	245.138	246.66	292.877	259.142	316.184	310.004	0.678316	-2.22887	-0.174121	-2.05475	GPBP1L1	-	chr1_45661148_-
chrX:3529178-3529252:mpeak_88341|chrX_3526986_3631675_PRKX_NM_-|	161.543	-3.04868	1.27016	-2.40024	0.0163845	0.0812208	1.70234	0	0	8.22673	3.80944	4.45248	245.138	230.781	277.507	451.442	324.755	390.705	0.677842	-3.27588	-0.631147	-2.64473	PRKX	-	-
chr3:196028136-196028241:mpeak_62856|chr3_196018245_196045165_TCTEX1D2_NM_-|	62.3779	-3.26107	1.31906	-2.47227	0.0134259	0.0715595	0	0	0.853867	2.05668	1.90472	6.12216	136.188	104.804	137.473	91.5224	139.045	128.565	0.676841	-3.56185	0.0756415	-3.63749	TCTEX1D2	chr3:196028142:-	-
chr15:99195742-99195862:mpeak_31137|chr15_99191767_99500289_IGF1R_NM_+|	426.26	-1.66703	0.504739	-3.30275	0.000957431	0.013073	5.10703	9.52765	6.83094	20.5668	7.61888	13.3574	1075.88	916.771	1194.56	612.892	575.226	676.777	0.673492	-0.952583	0.773202	-1.72578	IGF1R	-	-
chr8:141804756-141804866:mpeak_84207|chr8_141669777_142011412_PTK2_NM_-|	127.647	-3.43388	1.31368	-2.61394	0.00895035	0.0552985	1.70234	0	0	5.14171	3.80944	4.45248	199.174	323.94	235.667	192.3	332.374	233.199	0.673057	-2.97703	0.00173005	-2.97876	PTK2	-	-
chr9:134105532-134105584:mpeak_87786|chr9_134000947_134108840_NUP214_NM_+|	190.313	-3.12282	0.771117	-4.04974	5.12754e-05	0.00222026	1.70234	0	6.83094	9.25508	0.95236	5.5656	684.343	721.984	498.659	102.834	138.092	113.538	0.671917	-0.886288	2.42607	-3.31235	NUP214	-	-
chr14:105921484-105921578:mpeak_28272|chr14_105886185_105936401_MTA1_NM_+|	334.773	-1.68978	0.66893	-2.5261	0.0115337	0.0653543	0	2.11725	10.2464	5.14171	5.71416	8.90496	1057.16	797.146	929.008	365.061	502.846	333.936	0.666311	-0.676538	1.21155	-1.88809	MTA1	chr14:105921535:+;chr14:105921574:+	chr14_105455232_+;chr14_105455251_+
chr1:6606890-6606948:mpeak_302|chr1_6586063_6614658_NOL9_NM_-|	220.613	-2.01076	0.788662	-2.54959	0.0107851	0.0626499	3.40469	3.17588	0	8.22673	3.80944	5.5656	456.228	438.272	589.169	351.693	410.467	377.348	0.665301	-1.41944	0.380758	-1.80019	NOL9	-	-
chr2:234760516-234760567:mpeak_52070|chr2_234746298_234763212_HJURP_NM_-|	261.541	-1.67806	0.727474	-2.3067	0.0210717	0.0948846	3.40469	4.23451	0	7.19839	4.7618	5.5656	551.56	528.255	642.962	494.632	472.371	423.542	0.665135	-1.19799	0.309085	-1.50707	HJURP	-	-
chr4:39317334-39317416:mpeak_63992|chr4_39290464_39368001_RFC1_NM_-|	90.8579	-3.20741	1.39941	-2.29196	0.0219077	0.0971988	0	1.05863	0	10.2834	4.7618	0.55656	129.378	181.025	170.773	134.713	209.519	248.226	0.660024	-3.88144	-0.300145	-3.5813	RFC1	-	-
chr4:95682317-95682367:mpeak_65178|chr4_95679127_96075698_BMPR1B_NM_+|	154.743	-2.78581	1.29375	-2.15328	0.0312966	0.124141	1.70234	0	0	2.05668	5.71416	3.89592	234.924	310.178	231.398	309.531	329.517	427.995	0.6577	-2.77681	-0.458561	-2.31825	BMPR1B	chr4:95682368:+	chr4_94761216_+
chr9:131035900-131035972:mpeak_87524|chr9_131019560_131038268_GOLGA2_NM_-|	969.417	-1.37023	0.474532	-2.88755	0.00388259	0.031726	20.4281	10.5863	16.2235	19.5385	25.7137	25.6018	1773.84	2185.01	3237.87	1331.7	1569.49	1417	0.656381	-0.584904	0.73691	-1.32181	GOLGA2	chr9:131035919:-	chr9_128273641_-
chr2:232325198-232325282:mpeak_51957|chr2_232319978_232329205_NCL_NM_-|	1082.5	-1.43848	0.463949	-3.10051	0.00193187	0.0203847	5.10703	26.4657	13.6619	31.8786	30.4755	45.6379	2005.36	2564	2378.02	1704.99	2105.67	2078.75	0.651103	-1.25543	0.238345	-1.49377	NCL	chr2:232325202:-	chr2_231460481_-;chr2_231460515_-
chr19:1120840-1120955:mpeak_41603|chr19_1108703_1174282_SBNO2_NM_-|	120.724	-3.26519	1.14305	-2.85656	0.00428253	0.0338596	0	0	1.70773	3.08503	2.85708	9.46152	257.054	257.246	277.507	173.79	269.518	196.466	0.647027	-3.17311	0.307588	-3.4807	SBNO2	-	-
chr19:1151671-1151730:mpeak_41604|chr19_1108703_1174282_SBNO2_NM_-|	120.829	-3.26035	1.11741	-2.91778	0.00352531	0.0299103	0	0	1.70773	6.17005	3.80944	6.67872	257.054	257.246	277.507	173.79	269.518	196.466	0.647027	-3.28608	0.307588	-3.59367	SBNO2	-	-
chr1:2323870-2323946:mpeak_192|chr1_2323213_2334473_RER1_NM_+|	286.233	-1.98998	0.743142	-2.67779	0.00741094	0.0485902	5.10703	3.17588	0	7.19839	9.5236	5.00904	772.865	587.538	560.991	453.499	559.035	470.85	0.646634	-1.39155	0.373261	-1.76481	RER1	chr1:2323939:+	chr1_2392513_+
chr1:6603429-6603487:mpeak_301|chr1_6586063_6614658_NOL9_NM_-|	221.988	-2.17179	0.64453	-3.36957	0.000752867	0.0113225	5.10703	1.05863	3.41547	9.25508	12.3807	9.46152	456.228	438.272	589.169	351.693	410.467	377.348	0.645773	-1.69852	0.380758	-2.07928	NOL9	-	-
chr11:72479677-72479737:mpeak_15948|chr11_72466187_72504750_STARD10_NM_-|	204.896	-1.89883	0.907215	-2.09303	0.0363461	0.136593	5.10703	1.05863	0	2.05668	6.66652	3.33936	432.396	458.386	543.914	304.389	427.61	273.828	0.644631	-0.968209	0.512362	-1.48057	STARD10	-	-
chr14:55530193-55530244:mpeak_26086|chr14_55518361_55531333_MAPK1IP1L_NM_+|	282.513	-2.90656	1.18186	-2.4593	0.0139207	0.0734902	3.40469	0	0	5.14171	0	12.2443	493.68	582.245	509.759	588.211	577.13	618.338	0.644143	-2.35233	-0.169752	-2.18258	MAPK1IP1L	-	chr14_55063493_+
chr14:55526569-55526697:mpeak_26085|chr14_55518361_55531333_MAPK1IP1L_NM_+|	283.256	-3.25083	1.10515	-2.94153	0.00326599	0.0285167	3.40469	0	0	14.3968	8.57124	3.33936	493.68	582.245	509.759	588.211	577.13	618.338	0.644143	-2.94987	-0.169752	-2.78012	MAPK1IP1L	-	-
chr6:163956006-163956161:mpeak_76383|chr6_163835674_163984451_QKI_NM_+|	446.701	-1.61196	0.611837	-2.63463	0.00842295	0.0527453	5.10703	11.6449	1.70773	26.7369	9.5236	11.6878	966.932	976.054	925.592	732.179	892.361	800.89	0.643513	-1.3771	0.242095	-1.6192	QKI	-	chr6_163535069_+;chr6_163535083_+
chr16:14732750-14732880:mpeak_32218|chr16_14726667_14761491_BFAR_NM_+|	173.776	-2.47176	1.09784	-2.25148	0.0243551	0.104161	0	2.11725	0	5.14171	6.66652	2.7828	338.767	338.761	309.954	359.92	359.992	361.208	0.643229	-2.78482	-0.130701	-2.65411	BFAR	-	-
chr10:3205115-3205172:mpeak_9257|chr10_3180316_3215033_PITRM1_NM_-|	175.168	-3.57586	0.908891	-3.93431	8.34372e-05	0.00296162	5.10703	1.05863	0	3.08503	4.7618	13.914	437.503	476.382	531.106	173.79	237.138	218.172	0.640038	-1.81941	1.1997	-3.01911	PITRM1	chr10:3205118:-	chr10_3162930_-
chr19:48953564-48953708:mpeak_44564|chr19_48949029_48955964_GRWD1_NM_+|	316.5	-1.39373	0.585886	-2.37884	0.0173671	0.0843601	3.40469	2.11725	8.53867	9.25508	5.71416	12.2443	691.152	665.877	843.621	478.179	607.606	470.293	0.63893	-0.952666	0.500015	-1.45268	GRWD1	-	-
chr16:2805925-2806231:mpeak_31617|chr16_2802329_2820858_SRRM2_NM_+|	681.029	-3.47461	0.718372	-4.83679	1.31953e-06	0.000195661	10.2141	19.0553	0	15.4251	20.9519	18.3665	2667.57	2449.66	1768.36	398.997	395.229	408.515	0.637621	-0.903297	2.51726	-3.42055	SRRM2	-	chr16_2756041_+;chr16_2756145_+
chr10:74111894-74111956:mpeak_11129|chr10_74095689_74114907_DNAJB12_NM_-|	121.394	-3.59481	1.29881	-2.76776	0.00564423	0.040531	1.70234	0	0	0	2.85708	7.23528	274.078	241.367	287.753	189.215	237.138	215.389	0.635838	-2.56767	0.323763	-2.89143	DNAJB12	-	-
chr11:68238180-68238318:mpeak_15683|chr11_68228185_68380533_PPP6R3_NM_+|	370.883	-1.36735	0.587919	-2.32575	0.020032	0.0921152	8.51172	3.17588	4.26934	9.25508	5.71416	12.2443	737.115	773.857	1005	541.936	643.795	705.718	0.634225	-0.770141	0.411624	-1.18177	PPP6R3	-	chr11_68470830_+
chr7:66416257-66416341:mpeak_78264|chr7_66386202_66420488_TMEM248_NM_+|	221.85	-1.79075	0.743513	-2.40849	0.0160186	0.0797813	0	3.17588	2.5616	13.3684	2.85708	6.12216	476.657	420.275	460.235	368.146	468.561	440.239	0.634132	-1.96164	0.087899	-2.04953	TMEM248	chr7:66416322:+	chr7_66951351_+
chr14:91850804-91850893:mpeak_27529|chr14_91739997_91884188_CCDC88C_NM_-|	131.725	-2.5833	0.789705	-3.27122	0.00107084	0.0139028	3.40469	2.11725	0.853867	9.25508	3.80944	5.5656	376.218	276.302	356.917	180.988	170.472	194.796	0.631621	-1.54696	0.885899	-2.43286	CCDC88C	chr14:91850773:-;chr14:91850807:-;chr14:91850838:-	-
chr2:122123729-122123786:mpeak_49148|chr2_122098523_122407052_CLASP1_NM_-|	150.233	-2.39276	0.711946	-3.36088	0.000776955	0.0115207	1.70234	4.23451	1.70773	5.14171	8.57124	5.5656	389.837	485.91	336.424	177.903	203.805	181.995	0.630653	-1.33449	1.10458	-2.43907	CLASP1	-	-
chr1:150902854-150902973:mpeak_5449|chr1_150898814_150936722_SETDB1_NM_+|	93.3651	-5.27463	1.26153	-4.18113	2.90064e-05	0.00147688	1.70234	0	0	2.05668	8.57124	6.12216	292.803	258.305	260.43	98.7208	100.95	90.7193	0.629303	-3.29857	1.48267	-4.78124	SETDB1	chr1:150902863:+;chr1:150902912:+;chr1:150902968:+	chr1_150930385_+;chr1_150930449_+;chr1_150930490_+
chr18:9104445-9104566:mpeak_40266|chr18_9102627_9134183_NDUFV2_NM_+|	404.944	-2.55426	0.977626	-2.61272	0.00898242	0.0554156	5.10703	0	0	2.05668	11.4283	6.12216	684.343	763.27	995.609	673.564	802.84	914.985	0.627086	-1.94082	0.0309366	-1.97176	NDUFV2	-	-
chr1:117495030-117495155:mpeak_4517|chr1_117452544_117529422_PTGFRN_NM_+|	399.09	-3.1649	0.866137	-3.65404	0.000258143	0.00580272	6.80938	0	0	6.17005	5.71416	6.67872	1038.43	881.837	1348.26	491.547	434.276	569.361	0.624996	-1.44683	1.12832	-2.57514	PTGFRN	-	-
chr2:9728408-9728462:mpeak_45760|chr2_9725474_9771184_YWHAQ_NM_-|	488.544	-1.95215	0.768174	-2.54128	0.0110447	0.0637198	10.2141	0	2.5616	23.6519	5.71416	8.3484	958.42	1172.96	937.546	842.212	951.408	949.492	0.624437	-1.56172	0.16192	-1.72364	YWHAQ	-	-
chr12:863437-863497:mpeak_17533|chr12_862088_1017640_WNK1_NM_+|	383.528	-2.14964	0.806937	-2.66394	0.00772305	0.049981	5.10703	3.17588	0	18.5102	2.85708	17.2534	623.058	772.798	598.561	906.997	824.744	829.275	0.622958	-2.22116	-0.360749	-1.86041	WNK1	-	chr12_754321_+
chr16:85701823-85702033:mpeak_34775|chr16_85645028_85706010_GSE1_NM_+|	2199.64	-0.959662	0.464736	-2.06496	0.0389264	0.143365	30.6422	24.3484	56.3552	33.9353	25.7137	41.1855	6954.08	4413.42	6554.29	2670.6	2856.13	2734.94	0.621288	0.143059	1.11721	-0.97415	GSE1	-	-
chr8:37994079-37994130:mpeak_81700|chr8_37963010_37996481_ASH2L_NM_+|	77.8131	-3.8988	1.10824	-3.518	0.00043481	0.00798916	1.70234	0	0.853867	7.19839	2.85708	5.5656	207.686	202.198	212.613	82.2673	109.521	101.294	0.615958	-2.61141	1.08676	-3.69817	ASH2L	-	-
chr13:28225634-28225694:mpeak_23197|chr13_28194879_28239822_POLR1D_NM_+|	108.398	-2.9251	1.3594	-2.15176	0.0314164	0.124429	0	1.05863	0	3.08503	5.71416	5.00904	146.402	103.745	266.407	185.102	287.613	296.647	0.614821	-3.70526	-0.574742	-3.13052	POLR1D	chr13:28225681:+	chr13_27651564_+
chr11:31525829-31525890:mpeak_14181|chr11_31454115_31531175_IMMP1L_NM_-|	82.6662	-4.01769	1.29806	-3.09514	0.00196719	0.0206268	0	1.05863	0	3.08503	2.85708	10.0181	171.937	138.68	206.636	151.166	145.711	160.846	0.61399	-3.91421	0.176394	-4.09061	IMMP1L	chr11:31525828:-	chr11_31504279_-
chr12:53416280-53416531:mpeak_19413|chr12_53400041_53433926_EIF4B_NM_+|	553.001	-1.48189	0.437972	-3.38352	0.000715619	0.0108729	5.10703	7.41039	10.2464	16.4535	21.9043	13.914	1261.44	1302.11	1176.63	952.244	984.74	883.818	0.60863	-1.19929	0.407001	-1.60629	EIF4B	-	-
chr2:74325021-74325081:mpeak_47846|chr2_74213530_74327519_TET3_NM_+|	164.263	-3.82942	0.983186	-3.89491	9.82345e-05	0.00326881	3.40469	1.05863	0	15.4251	6.66652	12.8009	498.787	300.65	321.908	351.693	219.995	238.764	0.597049	-2.96673	0.468431	-3.43516	TET3	-	-
chr10:103912696-103912753:mpeak_12317|chr10_103911932_103921867_NOLC1_NM_+|	391.672	-1.82673	0.682036	-2.67834	0.00739871	0.0485789	5.10703	0	8.53867	3.08503	9.5236	5.5656	1135.46	875.485	1419.13	460.697	412.372	365.104	0.596738	-0.413447	1.47003	-1.88348	NOLC1	-	-
[truncated: 7,061 more rows]
