# Supplementary material for: Compartment-specific and ELAVL1-coordinated regulation of intronic polyadenylation isoforms by doxorubicin
Source: HighWire-hosted journal article supplement (doi:10.1101/gr.276192.121), 2022-07-01
Supplement: Supplemental_Table_S12.xlsx.xlsx [file Supplemental_Table_S12.xlsx.xlsx]

## Sheet: Sheet1
Supplemental Table S12 : 3’-seq data set of IPA:LE isoform ratio regulation in polysomes versus cytosol in MCF-7 cells treated with doxorubicin for 6 hours.
IPA peaks	baseMean	log2FoldChange IPA:LE	lfcSE	stat	pvalue	padj	7	16	28	2	12	22	LE.07	LE.16	LE.28	LE.02	LE.12	LE.22	%IPA (Poly)	log2FC_IPA	log2FC_LE	log2FC IPA-logFC LE	gene	Tian polyA site	Zavolan polyA site
chr10:79800316-79800570:mpeak_10453|chr10_79793517_79814288_RPS24_NM_+|	9135.51	-2.72535	0.892209	-3.05461	0.00225356	0.0637164	17155.4	16072	15155.5	18876.2	19999.1	22342	0	12.142	9.44807	3.82865	0	0.63088	149398	-0.339445	2.2754	-2.61485	RPS24	chr10:79800427:+;chr10:79800455:+;chr10:79800495:+;chr10:79800572:+	chr10_78040635_+;chr10_78040713_+;chr10_78040749_+;chr10_78040812_+
chr20:43127839-43128333:mpeak_49400|chr20_43124996_43150726_SERINC3_NM_-|	161.964	-1.6473	0.751637	-2.19162	0.0284069	0.247935	356.96	357.514	351.153	281.406	283.189	287.051	6.26246	2.69822	11.8101	0.957163	2.04469	2.52352	5130.42	0.323377	1.91041	-1.58703	SERINC3	chr20:43127846:-;chr20:43127874:-;chr20:43127990:-;chr20:43128119:-;chr20:43128169:-;chr20:43128234:-	chr20_44499479_-;chr20_44499529_-;chr20_44499599_-;chr20_44499628_-;chr20_44499658_-
chr20:43141481-43141641:mpeak_49405|chr20_43124996_43150726_SERINC3_NM_-|	111.213	-2.08107	0.900927	-2.30992	0.0208925	0.212649	294.335	129.515	199.197	275.663	188.111	221.439	6.26246	2.69822	11.8101	0.957163	2.04469	2.52352	2999.63	-0.137213	1.91041	-2.04762	SERINC3	-	chr20_44512810_-;chr20_44512978_-
chr10:79795394-79795529:mpeak_10449|chr10_79793517_79814288_RPS24_NM_+|	117.477	-2.6263	1.30413	-2.01384	0.0440268	0.317778	360.717	105.231	156.68	415.409	172.776	172.861	0	12.142	9.44807	3.82865	0	0.63088	1922.58	-0.289612	2.2754	-2.56502	RPS24	chr10:79795417:+;chr10:79795481:+	chr10_78035722_+
chr20:391233-391415:mpeak_48264|chr20_388708_410993_RBCK1_NM_+|	641.018	-1.82181	0.538442	-3.38348	0.000715725	0.0335201	1078.39	762.247	1066.06	1596.55	1942.45	1004.99	53.8571	47.2189	65.3491	23.9291	34.7597	16.4029	1746.55	-0.644579	1.14815	-1.79273	RBCK1	chr20:391355:+;chr20:391408:+	chr20_410649_+;chr20_410701_+;chr20_410763_+
chr3:44401147-44401312:mpeak_54055|chr3_44379610_44448933_TCAIM_NM_+|	59.3299	-5.88681	1.7168	-3.42895	0.000605932	0.0316494	71.392	94.4377	92.1186	159.846	127.793	151.411	0	0	14.9594	0	0	0	574.773	-0.767305	Inf	-Inf	TCAIM	chr3:44401292:+;chr3:44401327:+	chr3_44359811_+
chr17:35500753-35500838:mpeak_34232|chr17_35444374_35766902_ACACA_NM_-|	524.191	-1.41809	0.406323	-3.49007	0.000482902	0.0284494	1089.67	682.65	755.058	1139.02	974.294	979.757	131.512	191.574	136.21	67.9585	80.7652	61.8263	550.273	-0.291402	1.12526	-1.41666	ACACA	-	-
chr4:4276087-4276428:mpeak_58513|chr4_4269750_4291896_LYAR_NM_-|	88.2047	-1.17466	0.566186	-2.07469	0.038015	0.291422	110.219	118.722	68.4985	219.19	218.782	211.976	10.0199	26.9822	19.6835	15.3146	16.3575	22.7117	524.718	-1.12773	0.0598051	-1.18753	LYAR	-	chr4_4274449_-;chr4_4274530_-;chr4_4274619_-;chr4_4274648_-;chr4_4274683_-
chr20:3342298-3342383:mpeak_48380|chr20_3233330_3388309_C20orf194_NM_-|	34.4627	-6.69188	1.57775	-4.24141	2.22124e-05	0.00610935	40.0797	55.3135	25.9822	55.5154	116.547	99.6791	6.26246	0	14.1721	0	0	0	395.981	-1.16276	Inf	-Inf	C20orf194	chr20:3342325:-	-
chr10:27456406-27456642:mpeak_9172|chr10_27443752_27475307_MASTL_NM_+|	29.3478	-2.48705	1.11565	-2.22923	0.0257985	0.232705	36.3222	51.2662	35.4302	44.0295	87.9216	41.6381	1.25249	33.7278	9.44807	2.87149	5.11172	3.1544	276.893	-0.4968	1.99604	-2.49284	MASTL	chr10:27456470:+;chr10:27456517:+;chr10:27456589:+	chr10_27167540_+;chr10_27167593_+;chr10_27167658_+
chr9:127814403-127814547:mpeak_80749|chr9_127715232_127905838_SCAI_NM_-|	11.8234	-4.27558	2.11653	-2.02009	0.0433746	0.314933	7.51495	18.8875	50.3897	15.3146	16.3575	20.8191	0	0	12.5974	0	0	0	203.195	0.548885	Inf	-Inf	SCAI	chr9:127814412:-;chr9:127814483:-	chr9_125052133_-;chr9_125052205_-
chr8:100508096-100508188:mpeak_76961|chr8_100025493_100887645_VPS13B_NM_+|	26.7827	-3.66663	0.827782	-4.42946	9.44686e-06	0.00455948	33.8173	17.5384	18.1088	50.7296	82.8099	75.7057	16.2824	8.09466	10.2354	2.87149	2.04469	3.1544	200.692	-1.59085	2.10055	-3.69139	VPS13B	chr8:100508148:+;chr8:100508184:+	-
chr1:223010671-223010727:mpeak_7627|chr1_222988430_223175726_DISP1_NM_+|	22.1178	-3.25039	1.34349	-2.41937	0.0155474	0.180307	10.0199	25.6331	46.453	50.7296	49.0725	49.2087	0	10.7929	18.1088	2.87149	0	2.52352	189.392	-0.859857	2.42146	-3.28131	DISP1	chr1:223010726:+	chr1_222837382_+
chr6:88305100-88305169:mpeak_68945|chr6_88299784_88376735_ORC3_NM_+|	22.9116	-1.82529	0.806766	-2.26248	0.0236677	0.224889	18.7874	32.3786	20.4708	21.0576	48.0502	46.6852	13.7774	20.2367	25.1948	9.57163	14.3128	4.41616	120.99	-0.692774	1.06498	-1.75775	ORC3	chr6:88305161:+	chr6_87595442_+
chr1:10707260-10707347:mpeak_489|chr1_10700116_10856733_CASZ1_NM_-|	51.3981	-1.35779	0.555866	-2.44267	0.0145793	0.172645	53.8571	60.71	61.4124	65.0871	69.5194	71.9204	31.3123	45.8698	82.6706	24.8862	25.5586	23.9735	110.089	-0.230922	1.10301	-1.33393	CASZ1	chr1:10707270:-	chr1_10647204_-
chr17:38248771-38248905:mpeak_34418|chr17_38218445_38249272_THRA_NM_+|	31.8128	-1.56722	0.640326	-2.44753	0.014384	0.172149	12.5249	24.284	30.7062	54.5583	75.6535	56.1484	23.7973	25.6331	17.3215	21.0576	25.5586	14.5103	101.143	-1.46481	0.127012	-1.59182	THRA	chr17:38248825:+;chr17:38248901:+	chr17_40092570_+;chr17_40092647_+
chr7:27580693-27580891:mpeak_71584|chr7_27565991_27702620_HIBADH_NM_-|	13.6126	-2.2969	1.03853	-2.21169	0.0269882	0.239116	12.5249	12.142	19.6835	14.3574	23.5139	24.6043	6.26246	29.6804	8.66073	1.91433	3.06703	6.93969	99.4323	-0.494349	1.90365	-2.398	HIBADH	-	-
chr6:43025665-43025825:mpeak_68123|chr6_43022224_43027283_MRPL2_NM_-|	23.9737	-1.89595	0.951133	-1.99336	0.0462224	0.32529	30.0598	17.5384	7.87339	31.5864	63.3854	21.4499	8.76744	35.0769	29.9189	16.2718	11.2458	14.5103	75.2023	-1.06954	0.811557	-1.88109	MRPL2	chr6:43025630:-;chr6:43025678:-	chr6_43057876_-;chr6_43057940_-;chr6_43058027_-
chr16:89864756-89864856:mpeak_32417|chr16_89805116_89883065_FANCA_NM_-|	77.0484	-2.66515	0.786755	-3.38752	0.000705265	0.0335201	45.0897	79.5975	145.658	63.1727	104.279	66.8733	111.472	109.278	148.02	17.2289	27.6033	6.3088	73.31	0.206289	2.85017	-2.64388	FANCA	chr16:89864762:-;chr16:89864793:-	chr16_89798356_-;chr16_89798402_-
chr13:114012986-114013052:mpeak_22968|chr13_113978892_114018463_GRTP1_NM_-|	28.3021	-2.65684	0.793353	-3.34887	0.000811416	0.0350672	8.76744	20.2367	13.3848	66.0442	78.7205	46.6852	10.0199	17.5384	33.0682	16.2718	19.4245	9.46321	69.9179	-2.17521	0.424921	-2.60013	GRTP1	chr13:114012999:-	chr13_113358685_-
chr5:66226731-66226792:mpeak_63106|chr5_65892175_66458974_MAST4_NM_+|	41.5497	-1.56583	0.624474	-2.50744	0.012161	0.156974	46.3422	43.1715	26.7695	44.0295	56.229	41.0072	58.8671	37.7751	74.0098	28.7149	13.2905	28.3896	68.1405	-0.280768	1.27751	-1.55828	MAST4	chr5:66226789:+	chr5_66930961_+
chr8:145279554-145279615:mpeak_78110|chr8_145202918_145316557_MROH1_NM_+|	11.7858	-3.39874	1.11329	-3.05288	0.0022666	0.0637164	17.5349	8.09466	10.2354	16.2718	21.4692	6.93969	13.7774	18.8875	21.2581	2.87149	4.08938	0	66.5113	-0.317077	2.95356	-3.27064	MROH1	chr8:145279614:+	chr8_144224708_+
chr19:49663126-49663183:mpeak_41162|chr19_49661015_49714750_TRPM4_NM_+|	43.9806	-3.73267	0.859447	-4.34311	1.40481e-05	0.0056198	42.5847	32.3786	29.9189	94.7591	74.6312	60.5645	47.5947	37.7751	79.5212	1.91433	20.4469	5.67792	63.607	-1.13258	2.556	-3.68858	TRPM4	chr19:49663179:+	chr19_49159921_+
chr5:74982768-74982825:mpeak_63459|chr5_74970403_75013313_POC5_NM_-|	4.00538	-4.38662	2.19107	-2.00204	0.0452799	0.321156	0	6.74555	3.93669	4.78581	3.06703	10.725	0	8.09466	9.44807	0	0	1.26176	60.8927	-0.798366	3.79736	-4.59573	POC5	chr5:74982773:-	chr5_75686949_-
chr7:129837724-129837858:mpeak_73952|chr7_129806345_129845338_TMEM209_NM_-|	29.1988	-3.54727	0.75324	-4.70935	2.48509e-06	0.0018605	17.5349	14.8402	19.6835	50.7296	74.6312	59.3028	12.5249	43.1715	31.4936	13.4003	6.13407	6.93969	59.707	-1.82669	1.71958	-3.54628	TMEM209	chr7:129837744:-;chr7:129837807:-	chr7_130197884_-;chr7_130197918_-;chr7_130197962_-
chr9:135533417-135533526:mpeak_81233|chr9_135470499_135545788_DDX31_NM_-|	16.1796	-2.67218	1.04706	-2.55209	0.010708	0.145759	3.75747	5.39644	18.1088	57.4298	18.4022	16.4029	15.0299	14.8402	19.6835	10.5288	5.11172	9.46321	55.0166	-1.75838	0.981088	-2.73947	DDX31	chr9:135533415:-;chr9:135533470:-	chr9_132658030_-;chr9_132658084_-
chr8:92081463-92082059:mpeak_76652|chr8_92075974_92082417_OTUD6B-AS1_NR_-|	91.9846	-1.93846	0.654378	-2.9623	0.0030535	0.0745451	27.5548	58.0117	22.0455	170.375	198.335	167.814	51.3521	101.183	46.453	60.3012	111.436	88.9541	54.0796	-2.3178	-0.389656	-1.92815	OTUD6B-AS1	-	chr8_91069375_-;chr8_91069625_-;chr8_91069717_-;chr8_91069753_-
chr15:77025563-77025714:mpeak_28264|chr15_76641077_77176217_SCAPER_NM_-|	7.88716	-3.40165	1.31159	-2.59353	0.00949971	0.140679	8.76744	13.4911	2.36202	8.61446	6.13407	4.41616	18.7874	10.7929	17.3215	1.91433	2.04469	0	52.494	0.361412	3.56643	-3.20501	SCAPER	-	chr15_76733323_-
chr5:131706471-131706533:mpeak_64703|chr5_131705400_131729876_SLC22A5_NM_+|	60.8315	-1.41705	0.610637	-2.3206	0.0203082	0.208275	41.3322	39.1242	59.8377	69.8729	69.5194	38.4837	58.8671	80.9466	140.146	44.0295	39.8714	47.9469	50.1122	-0.342417	1.08635	-1.42876	SLC22A5	chr5:131706532:+	chr5_132370833_+
chr11:134092969-134093125:mpeak_16153|chr11_134022947_134094426_NCAPD3_NM_-|	31.0697	-3.7471	0.839895	-4.46139	8.14295e-06	0.00455948	37.5747	22.9349	19.6835	30.6292	47.0279	36.5911	23.7973	90.3904	47.2403	2.87149	7.15641	6.93969	49.6773	-0.510621	3.25004	-3.76066	NCAPD3	chr11:134092971:-;chr11:134092999:-	chr11_134223057_-;chr11_134223099_-
chr1:156107599-156107663:mpeak_5561|chr1_156052336_156108870_LMNA_NM_+|	2058.45	-1.04159	0.467391	-2.22852	0.0258461	0.232822	1551.84	1617.58	3089.52	782.002	850.591	835.286	3600.91	3998.76	5807.41	931.319	839.345	796.802	46.6838	1.34265	2.38458	-1.04193	LMNA	chr1:156107620:+;chr1:156107657:+	chr1_156137865_+
chr17:79224660-79224735:mpeak_36829|chr17_79220473_79269139_SLC38A10_NM_-|	177.172	-1.36293	0.461665	-2.95221	0.00315513	0.0764721	141.532	98.4851	199.197	99.5449	82.8099	83.2762	335.668	344.023	471.616	86.1446	104.279	79.4909	38.1491	0.725498	2.0927	-1.3672	SLC38A10	chr17:79224670:-	chr17_81250873_-
chr1:231113547-231113608:mpeak_7959|chr1_231042765_231114618_TTC13_NM_-|	23.0196	-2.03381	0.908495	-2.23866	0.025178	0.230189	23.7973	9.44377	13.3848	21.0576	11.2458	21.4499	76.402	25.6331	34.6429	22.0147	10.2234	6.93969	34.1137	-0.205223	1.80267	-2.00789	TTC13	chr1:231113551:-	chr1_230977809_-
chr8:145134109-145134260:mpeak_78088|chr8_145133521_145135144_EXOSC4_NM_+|	87.8648	-1.21252	0.530057	-2.28752	0.0221655	0.21927	47.5947	43.1715	29.1315	98.5878	106.324	51.1013	112.724	114.674	124.4	111.031	129.838	85.7997	34.0814	-1.09441	0.106921	-1.20133	EXOSC4	chr8:145134162:+;chr8:145134256:+	chr8_144079258_+;chr8_144079374_+
chr11:71171905-71171997:mpeak_14638|chr11_71164216_71212347_NADSYN1_NM_+|	92.2629	-1.37295	0.49857	-2.75378	0.00589121	0.107575	57.6146	45.8698	48.0277	79.4445	77.6982	75.0748	116.482	110.627	225.966	82.316	102.234	85.7997	33.4408	-0.616044	0.74492	-1.36096	NADSYN1	chr11:71171993:+	chr11_71460942_+
chr2:112638030-112638096:mpeak_45005|chr2_112526983_112641741_ANAPC1_NM_-|	67.6439	-1.73452	0.557928	-3.10886	0.0018781	0.0576612	21.2923	63.4082	31.4936	61.2584	54.1843	60.5645	97.6943	137.609	120.463	46.901	61.3407	55.5175	32.6602	-0.599098	1.11935	-1.71845	ANAPC1	chr2:112638031:-	-
chr15:76995226-76995358:mpeak_28262|chr15_76641077_77176217_SCAPER_NM_-|	7.86789	-4.72732	1.19912	-3.94232	8.06971e-05	0.0113279	5.00996	6.74555	3.14936	11.486	10.2234	6.93969	18.7874	10.7929	17.3215	1.91433	2.04469	0	31.779	-0.942705	3.56643	-4.50913	SCAPER	-	-
chr7:27579499-27579556:mpeak_71583|chr7_27565991_27702620_HIBADH_NM_-|	7.72446	-3.36268	1.43437	-2.34436	0.0190596	0.200037	6.26246	0	3.14936	3.82865	7.15641	15.772	6.26246	29.6804	8.66073	1.91433	3.06703	6.93969	31.6515	-1.50738	1.90365	-3.41103	HIBADH	chr7:27579500:-	chr7_27539883_-
chr3:63884111-63884234:mpeak_54774|chr3_63850232_63985125_ATXN7_NM_+|	38.7558	-1.82569	0.823957	-2.21576	0.0267079	0.237127	18.7874	9.44377	8.66073	51.6868	54.1843	55.5175	13.7774	47.2189	57.4757	53.6011	26.581	68.1351	31.1397	-2.12916	-0.324139	-1.80502	ATXN7	-	-
chr22:24487912-24488026:mpeak_51801|chr22_24407764_24574020_CABIN1_NM_+|	55.4609	-1.06697	0.529078	-2.01667	0.0437301	0.316832	38.8272	36.426	25.9822	31.5864	37.8268	20.8191	116.482	86.3431	129.124	54.5583	49.0725	38.4837	30.4973	0.166	1.2239	-1.0579	CABIN1	chr22:24487973:+;chr22:24488033:+	chr22_24092017_+
chr20:44482053-44482185:mpeak_49506|chr20_44470595_44486048_ACOT8_NM_-|	35.8797	-1.25487	0.635567	-1.9744	0.0483358	0.333211	23.7973	13.4911	14.1721	17.2289	35.7821	30.9131	53.8571	44.5206	75.5845	33.5007	51.1172	36.5911	29.5814	-0.705619	0.521278	-1.2269	ACOT8	chr20:44482059:-	chr20_45853419_-
chr18:48447435-48447568:mpeak_37976|chr18_48405431_48473386_ME2_NM_+|	7.2196	-2.64219	1.34181	-1.96913	0.0489387	0.335111	0	0	3.93669	3.82865	8.17876	5.04704	5.00996	20.2367	16.5341	6.70014	10.2234	6.93969	28.2668	-2.11509	0.808046	-2.92314	ME2	-	-
chr12:6879060-6879174:mpeak_16439|chr12_6875540_6879557_PTMS_NM_+|	348.985	-1.29246	0.571041	-2.26334	0.023615	0.22476	129.007	90.3904	235.414	300.549	154.374	292.729	638.77	473.538	677.111	419.237	365.999	410.703	25.4167	-0.717098	0.581347	-1.29845	PTMS	chr12:6879126:+;chr12:6879165:+	chr12_6769929_+;chr12_6769993_+
chr1:150905350-150905407:mpeak_5018|chr1_150898814_150936722_SETDB1_NM_+|	19.8137	-2.19532	0.993661	-2.20932	0.0271521	0.239779	0	0	7.87339	14.3574	18.4022	10.0941	23.7973	31.0295	39.3669	24.8862	35.7821	32.1749	25.0761	-2.44436	0.0208361	-2.4652	SETDB1	chr1:150905402:+	chr1_150932924_+
chr1:62235049-62235103:mpeak_2642|chr1_62208148_62626579_INADL_NM_+|	17.5143	-3.22832	1.04995	-3.07475	0.00210679	0.0616277	0	9.44377	0	11.486	10.2234	7.57057	42.5847	40.4733	41.729	15.3146	14.3128	17.0338	22.7037	-1.63248	1.41917	-3.05165	INADL	-	-
chr2:203162175-203162247:mpeak_47082|chr2_203130514_203168108_NOP58_NM_+|	82.4093	-1.45295	0.72353	-2.00814	0.0446286	0.319562	36.3222	10.7929	35.4302	59.3441	74.6312	67.5042	76.402	203.716	95.268	82.316	100.19	146.995	21.9895	-1.28737	0.188091	-1.47546	NOP58	chr2:203162243:+	chr2_202297513_+
chr10:99379148-99379217:mpeak_11094|chr10_99376168_99393913_MORN4_NM_-|	16.5392	-1.88835	0.823944	-2.29184	0.0219147	0.21779	5.00996	0	7.08605	12.4431	13.2905	9.46321	30.0598	28.3313	29.9189	14.3574	24.5363	23.9735	20.5458	-1.54091	0.49027	-2.03118	MORN4	chr10:99379158:-	chr10_97619403_-
chr2:85785839-85785900:mpeak_44261|chr2_85777249_85788657_GGCX_NM_-|	228.915	-1.93028	0.655911	-2.9429	0.00325155	0.0769988	57.6146	141.657	129.124	68.9157	107.346	177.908	469.684	450.603	687.347	193.347	157.441	105.988	20.4272	-0.109012	1.81538	-1.92439	GGCX	chr2:85785848:-	chr2_85558726_-
chr2:174091818-174091877:mpeak_46309|chr2_173940564_174130777_ZAK_NM_+|	108.075	-1.13965	0.486023	-2.34485	0.0190348	0.200037	40.0797	41.8224	32.2809	47.8581	61.3407	75.7057	177.854	192.923	201.559	91.8876	167.665	165.922	19.9504	-0.695432	0.427791	-1.12322	ZAK	chr2:174091874:+	chr2_173227168_+
chr19:7662358-7662414:mpeak_38890|chr19_7660787_7682637_CAMSAP3_NM_+|	15.2391	-3.71863	1.09087	-3.40888	0.000652299	0.0324379	6.26246	2.69822	0	15.3146	28.6256	19.5573	18.7874	14.8402	35.4302	7.6573	20.4469	13.2485	19.4634	-2.82502	0.739824	-3.56485	CAMSAP3	chr19:7662413:+	chr19_7597524_+
chr14:24661825-24662158:mpeak_23379|chr14_24659014_24664942_TM9SF1_NM_-|	222.701	-1.22527	0.620245	-1.97546	0.0482161	0.333211	105.209	75.5502	120.463	101.459	104.279	51.1013	331.91	693.443	527.517	120.602	180.955	259.923	19.3978	0.22996	1.46763	-1.23767	TM9SF1	chr14:24661819:-;chr14:24661915:-;chr14:24661947:-;chr14:24661998:-;chr14:24662033:-;chr14:24662099:-	chr14_24192610_-;chr14_24192710_-;chr14_24192871_-
chr16:27650910-27650962:mpeak_30327|chr16_27561467_27789894_KIAA0556_NM_+|	11.3309	-2.81576	1.23447	-2.28094	0.0225518	0.22053	0	5.39644	0	4.78581	2.04469	5.67792	21.2923	25.6331	37.7923	8.61446	10.2234	14.5103	19.1097	-1.21282	1.34506	-2.55788	KIAA0556	chr16:27650961:+	chr16_27639639_+
chr3:49035470-49035554:mpeak_54291|chr3_49027340_49044119_P4HTM_NM_+|	74.9792	-1.25727	0.628893	-1.99917	0.0455895	0.322332	36.3222	32.3786	15.7468	55.5154	25.5586	33.4367	160.319	109.278	174.789	62.2156	100.19	94.0012	19.0032	-0.439353	0.79338	-1.23273	P4HTM	chr3:49035548:+	chr3_48998115_+
chr10:95259792-95259979:mpeak_10893|chr10_95256368_95287706_CEP55_NM_+|	21.8196	-1.64869	0.820365	-2.00971	0.0444622	0.318709	5.00996	4.04733	6.29871	20.1004	14.3128	27.7587	21.2923	39.1242	21.2581	19.1433	36.8044	46.6852	18.8014	-2.01746	-0.329531	-1.68793	CEP55	-	chr10_93500192_+;chr10_93500232_+
chr8:62546238-62546294:mpeak_76074|chr8_62416068_62627199_ASPH_NM_-|	65.0094	-1.43916	0.537439	-2.6778	0.00741071	0.123904	22.5448	18.8875	21.2581	43.0723	33.7374	47.9469	92.6843	144.355	105.503	69.8729	65.4301	114.82	18.3015	-0.992797	0.453644	-1.44644	ASPH	-	-
chr16:78155478-78155538:mpeak_31896|chr16_78133309_78312499_WWOX_NR_+mpeak_31896|chr16_78133309_79245504_WWOX_NM_+||	22.6145	-1.78032	0.827449	-2.15158	0.0314304	0.258897	0	6.74555	7.08605	10.5288	12.2681	18.9264	47.5947	28.3313	40.1543	29.672	42.9385	27.1279	17.8733	-1.59289	0.218902	-1.81179	WWOX	chr16:78155530:+	chr16_78121632_+
chr16:1462625-1462734:mpeak_29114|chr16_1416396_1464721_UNKL_NM_-|	21.4713	-2.76575	1.15247	-2.39984	0.0164021	0.184396	0	5.39644	0	8.61446	10.2234	21.4499	30.0598	24.284	37.0049	61.2584	34.7597	24.6043	17.7226	-2.90026	-0.401043	-2.49922	UNKL	chr16:1462684:-	chr16_1412678_-
chr8:42401692-42401757:mpeak_75707|chr8_42396297_42407686_SMIM19_NM_+|	44.289	-1.72459	0.87929	-1.96134	0.0498396	0.336156	12.5249	0	7.87339	39.2437	19.4245	35.3293	65.1295	80.9466	30.7062	71.7872	64.4077	104.095	17.308	-2.20417	-0.442803	-1.76137	SMIM19	-	chr8_42546600_+
chr10:125770957-125771029:mpeak_11976|chr10_125769855_125853123_CHST15_NM_-|	10.4562	-2.03126	1.02105	-1.98938	0.0466592	0.327148	3.75747	4.04733	2.36202	11.486	9.2011	2.52352	17.5349	24.284	17.3215	15.3146	8.17876	9.46321	17.191	-1.19091	0.843576	-2.03449	CHST15	chr10:125770977:-	chr10_124011462_-
chr19:36809565-36809617:mpeak_40302|chr19_36804224_36822620_LINC00665_NR_-|	5.37189	-3.35208	1.54484	-2.16986	0.0300175	0.253266	0	1.34911	0	2.87149	5.11172	5.04704	6.26246	8.09466	9.44807	10.5288	8.17876	7.57057	17.0019	-3.27179	-0.142586	-3.1292	LINC00665	chr19:36809566:-;chr19:36809616:-	-
chr12:83099063-83099192:mpeak_19227|chr12_83080933_83525988_TMTC2_NM_+|	4.74646	-4.3937	1.99197	-2.2057	0.0274049	0.240749	0	1.34911	0	0.957163	9.2011	5.67792	6.26246	17.5384	0.787339	4.78581	4.08938	6.3088	16.4604	-3.55314	0.695416	-4.24856	TMTC2	-	-
chr22:30218090-30218164:mpeak_52012|chr22_30185173_30234293_ASCC2_NM_-|	64.6474	-1.8508	0.681237	-2.71682	0.00659131	0.11441	25.0498	10.7929	16.5341	60.3012	54.1843	35.3293	60.1196	97.1359	162.979	76.573	69.5194	107.25	16.3558	-1.51618	0.338042	-1.85422	ASCC2	chr22:30218106:-	chr22_29822117_-
chr20:33470710-33470811:mpeak_49072|chr20_33462765_33514889_ACSS2_NM_+|	18.6715	-2.25007	0.87526	-2.57075	0.0101479	0.143352	2.50498	12.142	6.29871	9.57163	6.13407	16.4029	28.8073	41.8224	57.4757	10.5288	15.3352	17.0338	16.3503	-0.616306	1.57836	-2.19466	ACSS2	chr20:33470799:+	chr20_34882957_+;chr20_34882989_+;chr20_34883048_+
chr6:13615935-13616004:mpeak_66832|chr6_13615558_13620985_NOL7_NM_+|	251.922	-1.02844	0.376815	-2.7293	0.0063469	0.111951	61.3721	40.4733	53.539	168.461	161.53	148.257	285.568	391.242	279.505	412.537	493.792	526.785	16.2482	-1.62192	-0.583596	-1.03832	NOL7	chr6:13616004:+;chr6:13616053:+	chr6_13615731_+
chr6:88313539-88313592:mpeak_68948|chr6_88299784_88376735_ORC3_NM_+|	8.73142	-2.95322	1.33983	-2.20417	0.0275122	0.241376	0	0	3.14936	7.6573	2.04469	4.41616	13.7774	20.2367	25.1948	9.57163	14.3128	4.41616	15.9572	-2.16442	1.06498	-3.2294	ORC3	chr6:88313591:+	chr6_87603872_+
chr5:80946076-80946153:mpeak_63698|chr5_80716352_81047072_SSBP2_NM_-|	61.3123	-1.53062	0.594622	-2.57411	0.0100498	0.143352	26.3023	6.74555	25.1948	40.2008	23.5139	35.9602	144.036	107.929	113.377	75.6158	67.4747	69.3969	15.942	-0.775153	0.78187	-1.55702	SSBP2	-	-
chr9:135759637-135759760:mpeak_81246|chr9_135754289_135765343_C9orf9_NM_+|	11.7824	-3.13066	1.1797	-2.65379	0.00795936	0.128591	0	0	3.93669	4.78581	9.2011	8.83233	21.2923	13.4911	39.3669	13.4003	16.3575	10.725	15.9272	-2.53519	0.873147	-3.40834	C9orf9	chr9:135759695:+;chr9:135759733:+;chr9:135759761:+	chr9_132884307_+;chr9_132884373_+
chr17:79223860-79224043:mpeak_36827|chr17_79220473_79269139_SLC38A10_NM_-|	142.905	-1.43472	0.547302	-2.62144	0.00875602	0.133664	32.5648	58.0117	88.1819	37.3293	46.0055	31.544	335.668	344.023	471.616	86.1446	104.279	79.4909	15.5266	0.637898	2.0927	-1.4548	SLC38A10	chr17:79223863:-;chr17:79223939:-;chr17:79223990:-	chr17_81250060_-;chr17_81250139_-;chr17_81250192_-
chr2:11721255-11721403:mpeak_42187|chr2_11674241_11780416_GREB1_NM_+|	182.971	-1.96319	0.462425	-4.24542	2.1818e-05	0.00610935	60.1196	55.3135	72.4352	119.645	94.0557	75.0748	295.588	547.739	392.882	176.118	145.173	161.505	15.1971	-0.620228	1.35644	-1.97666	GREB1	chr2:11721329:+;chr2:11721391:+	chr2_11581202_+;chr2_11581264_+
chr2:109397748-109397893:mpeak_44903|chr2_109335936_109400051_RANBP2_NM_+|	48.3602	-1.58232	0.777733	-2.03453	0.0418981	0.308873	11.2724	10.7929	7.08605	37.3293	35.7821	34.0675	38.8272	124.118	35.4302	62.2156	95.0781	88.3233	14.695	-1.87839	-0.308175	-1.57021	RANBP2	-	-
chr4:143347501-143347689:mpeak_61125|chr4_142950067_143767604_INPP4B_NM_-|	61.925	-1.17331	0.575634	-2.03829	0.0415211	0.307101	12.5249	25.6331	11.0227	23.9291	40.8938	22.7117	107.714	130.864	97.63	93.8019	98.1451	78.2292	14.6281	-0.831759	0.315453	-1.14721	INPP4B	chr4:143347634:-	chr4_142426483_-
chr16:67699727-67699780:mpeak_31276|chr16_67697224_67700628_ENKD1_NM_-|	10.428	-2.95729	1.35096	-2.18903	0.0285945	0.248736	2.50498	0	0	3.82865	3.06703	10.0941	18.7874	14.8402	18.1088	15.3146	18.4022	20.1882	14.5255	-2.76179	-0.0592396	-2.70255	ENKD1	chr16:67699728:-	chr16_67665825_-
chr2:170667694-170667840:mpeak_46163|chr2_170655321_170668177_SSB_NM_+|	72.4723	-1.4691	0.747854	-1.96442	0.0494816	0.335769	23.7973	25.6331	10.2354	29.672	42.9385	37.8528	82.6644	248.236	85.8199	97.6306	76.6758	108.511	14.3179	-0.888591	0.559207	-1.4478	SSB	-	chr2_169811189_+;chr2_169811242_+;chr2_169811307_+
chr1:147093110-147093169:mpeak_4707|chr1_147013270_147095642_BCL9_NM_+|	23.8958	-2.25147	0.683786	-3.29265	0.00099249	0.0395904	5.00996	6.74555	5.51137	16.2718	21.4692	20.8191	46.3422	25.6331	50.3897	27.7577	28.6256	32.1749	14.111	-1.76191	0.466491	-2.2284	BCL9	chr1:147093167:+	chr1_147621366_+
chr19:53036277-53036332:mpeak_41403|chr19_53030908_53056359_ZNF808_NM_+|	5.45127	-4.12417	2.03483	-2.02679	0.0426843	0.312277	0	1.34911	0	11.486	0	2.52352	20.0399	6.74555	3.14936	9.57163	6.13407	4.41616	13.5205	-3.37632	0.573058	-3.94938	ZNF808	chr19:53036335:+	-
chrX:153353243-153353305:mpeak_83951|chrX_153296901_153363188_MECP2_NM_-|	46.2126	-2.36521	1.02457	-2.3085	0.0209715	0.212813	2.50498	17.5384	1.57468	27.7577	54.1843	59.3028	100.199	29.6804	37.7923	78.4873	73.6088	71.9204	12.8931	-2.70789	-0.417963	-2.28992	MECP2	chrX:153353249:-	chrX_154087794_-;chrX_154087839_-
chr14:67291191-67291289:mpeak_24631|chr14_66974124_67647520_GPHN_NM_+|	41.7708	-1.30424	0.662799	-1.96778	0.0490938	0.335151	17.5349	5.39644	18.1088	16.2718	9.2011	9.46321	98.9468	125.467	95.268	34.4579	27.6033	43.5308	12.8378	0.232317	1.59814	-1.36582	GPHN	-	-
chr19:15303755-15303813:mpeak_39458|chr19_15272525_15311792_NOTCH3_NM_-|	72.0975	-1.75794	0.593281	-2.96307	0.00304582	0.0745451	36.3222	21.5858	14.9594	18.1861	19.4245	27.7587	149.046	169.988	251.948	44.9866	54.1843	56.7792	12.7618	0.156659	1.87236	-1.7157	NOTCH3	chr19:15303758:-	-
chr2:24163469-24163525:mpeak_42366|chr2_24163375_24222541_UBXN2A_NM_+|	48.1298	-1.84002	0.725917	-2.53475	0.0112529	0.149542	16.2824	1.34911	4.72403	30.6292	32.715	52.994	57.6146	66.1064	52.7517	89.9733	74.6312	97.7865	12.668	-2.37962	-0.572273	-1.80735	UBXN2A	-	-
chr15:44950560-44950610:mpeak_26893|chr15_44855499_44955876_SPG11_NM_-|	8.91825	-4.19069	1.93305	-2.16791	0.0301656	0.253379	0	4.04733	2.36202	0	6.13407	8.20145	3.75747	49.9171	22.8328	0.957163	8.17876	0.63088	12.5661	-1.16134	2.96964	-4.13099	SPG11	chr15:44950558:-	chr15_44658362_-
chr13:114012784-114012921:mpeak_22967|chr13_113978892_114018463_GRTP1_NM_-|	10.1681	-3.09037	1.51301	-2.04252	0.0410997	0.304989	2.50498	0	0	7.6573	1.02234	5.04704	10.0199	17.5384	33.0682	16.2718	19.4245	9.46321	12.3955	-2.45411	0.424921	-2.87903	GRTP1	chr13:114012859:-	chr13_113358532_-
chr22:46786424-46786476:mpeak_52767|chr22_46759084_46933067_CELSR1_NM_-|	10.8966	-3.57925	1.24106	-2.88402	0.00392629	0.0862229	2.50498	4.04733	0	9.57163	6.13407	5.04704	32.5648	33.7278	13.3848	12.4431	8.17876	3.1544	12.3353	-1.66323	1.74465	-3.40787	CELSR1	chr22:46786425:-	chr22_46390529_-
chr1:62491280-62491480:mpeak_2657|chr1_62208148_62626579_INADL_NM_+|	16.3309	-3.55258	1.12645	-3.15377	0.00161176	0.0528689	5.00996	0	0	10.5288	2.04469	6.93969	42.5847	40.4733	41.729	15.3146	14.3128	17.0338	12.0444	-1.96158	1.41917	-3.38075	INADL	chr1:62491483:+	chr1_62025810_+
chr1:156699325-156699483:mpeak_5635|chr1_156698262_156706423_RRNAD1_NM_+|	25.5902	-1.69057	0.811531	-2.08318	0.0372349	0.287716	6.26246	4.04733	4.72403	7.6573	16.3575	20.8191	23.7973	51.2662	51.9644	40.2008	49.0725	30.9131	11.8351	-1.57638	0.0798702	-1.65625	RRNAD1	chr1:156699379:+;chr1:156699479:+	chr1_156729585_+;chr1_156729686_+
chr13:114160324-114160396:mpeak_22983|chr13_114145307_114203739_TMCO3_NM_+|	19.8981	-2.94402	1.30986	-2.24758	0.0246028	0.228025	0	4.04733	3.93669	12.4431	23.5139	13.8794	13.7774	75.5502	12.5974	12.4431	17.3799	49.2087	11.7499	-2.64201	0.367006	-3.00902	TMCO3	chr13:114160397:+	chr13_113506063_+
chr6:136682139-136682276:mpeak_69877|chr6_136665376_136871957_MAP7_NM_-|	165.684	-1.86913	0.479397	-3.89891	9.66255e-05	0.0120007	45.0897	31.0295	40.9416	94.7591	75.6535	86.4306	219.186	451.952	338.556	180.904	230.028	193.68	11.5937	-1.13363	0.739837	-1.87347	MAP7	chr6:136682143:-	-
chr3:113798860-113798911:mpeak_55567|chr3_113775581_113804519_QTRTD1_NM_+|	22.8617	-2.55771	0.900324	-2.84087	0.00449902	0.0915844	5.00996	0	2.36202	18.1861	20.4469	15.1411	20.0399	49.9171	26.7695	29.672	38.8491	47.9469	11.4322	-2.86679	-0.267952	-2.59884	QTRTD1	-	-
chr22:19992488-19992690:mpeak_51603|chr22_19958266_20004309_ARVCF_NM_-|	12.0013	-3.66793	1.1933	-3.07377	0.00211375	0.0616277	3.75747	2.69822	1.57468	19.1433	13.2905	5.67792	10.0199	22.9349	37.7923	2.87149	12.2681	11.9867	11.3508	-2.24669	1.38298	-3.62967	ARVCF	chr22:19992554:-;chr22:19992633:-	chr22_20005032_-;chr22_20005111_-
chr12:64174793-64174905:mpeak_18665|chr12_64173582_64202454_TMEM5_NM_+|	61.1771	-1.74719	0.735495	-2.37553	0.0175235	0.190867	11.2724	0	11.0227	23.9291	18.4022	41.0072	97.6943	110.627	94.4807	113.902	124.726	87.0615	11.0444	-1.90225	-0.105124	-1.79713	TMEM5	-	chr12_63781057_+
chr2:169088676-169088735:mpeak_46109|chr2_168812080_169104105_STK39_NM_-|	29.8609	-1.65642	0.768922	-2.15422	0.0312233	0.257822	8.76744	4.04733	4.72403	19.1433	12.2681	13.8794	81.4119	43.1715	37.0049	48.8153	54.1843	30.9131	10.854	-1.36867	0.271031	-1.6397	STK39	-	-
chr1:206629454-206629510:mpeak_7204|chr1_206516199_206634381_SRGAP2_NM_+|	18.2271	-3.33893	0.95703	-3.48885	0.00048511	0.0284494	7.51495	2.69822	2.36202	19.1433	11.2458	15.1411	15.0299	62.0591	40.1543	11.486	17.3799	14.5103	10.7257	-1.85624	1.43453	-3.29078	SRGAP2	chr1:206629505:+	chr1_206456119_+;chr1_206456158_+
chr8:71119349-71119406:mpeak_76250|chr8_71025878_71316020_NCOA2_NM_-|	10.4749	-3.43471	1.47576	-2.32742	0.019943	0.206414	2.50498	0	0	6.70014	3.06703	3.78528	20.0399	14.8402	35.4302	13.4003	5.11172	20.8191	10.6883	-2.43568	0.838068	-3.27375	NCOA2	chr8:71119353:-	-
chr6:13801520-13801630:mpeak_66853|chr6_13791096_13814792_MCUR1_NM_-|	126.037	-1.06041	0.53715	-1.97414	0.0483663	0.333211	27.5548	12.142	20.4708	73.7015	35.7821	47.9469	172.844	236.094	167.703	213.447	263.765	240.996	10.4341	-1.38766	-0.316729	-1.07093	MCUR1	chr6:13801520:-	chr6_13801288_-
chr15:43309283-43309333:mpeak_26738|chr15_43237668_43398286_UBR1_NM_-|	22.7502	-2.7277	1.12587	-2.42275	0.0154037	0.179568	7.51495	9.44377	0.787339	9.57163	14.3128	9.46321	25.0498	109.278	37.0049	7.6573	21.4692	21.4499	10.3577	-0.910087	1.76026	-2.67035	UBR1	-	-
chr19:17216690-17216749:mpeak_39583|chr19_17186590_17322703_MYO9B_NM_+|	24.9013	-1.9883	0.932861	-2.1314	0.0330559	0.267384	3.75747	8.09466	5.51137	4.78581	17.3799	10.0941	38.8272	32.3786	97.63	28.7149	32.715	18.9264	10.2843	-0.893677	1.07114	-1.96482	MYO9B	chr19:17216742:+	chr19_17105931_+
chr10:101514535-101514596:mpeak_11162|chr10_101491957_101515381_CUTC_NM_+|	27.4965	-2.92111	1.34201	-2.17667	0.0295055	0.251809	5.00996	0	0	6.70014	23.5139	4.41616	20.0399	75.5502	51.177	29.672	55.2066	58.6719	10.2406	-2.78916	0.0319695	-2.82113	CUTC	chr10:101514598:+	chr10_99754797_+;chr10_99754839_+
chr6:34950951-34951002:mpeak_67802|chr6_34857037_35056382_ANKS1A_NM_+|	26.2292	-2.11465	1.0054	-2.10331	0.035439	0.279186	3.75747	0	10.2354	3.82865	6.13407	12.6176	43.8372	83.6448	78.7339	22.0147	18.4022	31.544	10.1783	-0.690374	1.51887	-2.20924	ANKS1A	-	-
chr5:137661483-137661569:mpeak_65024|chr5_137621530_137674044_CDC25C_NM_-|	18.8884	-2.02562	1.02332	-1.97945	0.0477648	0.330922	5.00996	0	3.14936	9.57163	8.17876	3.78528	28.8073	24.284	68.4985	24.8862	21.4692	29.0205	10.0658	-1.40021	0.689845	-2.09005	CDC25C	chr5:137661486:-	chr5_138325800_-
chr1:16237690-16237803:mpeak_668|chr1_16174358_16265790_SPEN_NM_+|	9.50277	-3.70295	1.67122	-2.21571	0.0267111	0.237127	1.25249	0	0	12.4431	2.04469	7.57057	8.76744	20.2367	8.66073	8.61446	12.2681	32.1749	9.97608	-4.13845	-0.494339	-3.64411	SPEN	-	-
chrX:119068456-119068534:mpeak_83434|chrX_119059357_119077735_NKAP_NM_-|	10.5575	-3.03916	1.28165	-2.37129	0.0177262	0.191946	1.25249	0	1.57468	4.78581	15.3352	10.0941	17.5349	5.39644	19.6835	13.4003	22.4916	15.1411	9.95137	-3.41784	-0.260076	-3.15776	NKAP	-	-
chr15:63932950-63933156:mpeak_27681|chr15_63901465_64126147_HERC1_NM_-|	23.5882	-3.42703	1.35185	-2.53506	0.0112427	0.149542	3.75747	9.44377	0	14.3574	4.08938	8.83233	22.5448	143.006	36.2176	12.4431	8.17876	20.1882	9.81417	-1.04712	2.3057	-3.35283	HERC1	-	-
chr1:193091185-193091467:mpeak_6719|chr1_193091087_193219805_CDC73_NM_+|	63.2957	-1.73429	0.520774	-3.33022	0.000867787	0.0365447	12.5249	8.09466	11.8101	32.5435	34.7597	30.2823	129.007	94.4377	109.44	76.573	121.659	98.4174	9.74202	-1.58935	0.166263	-1.75562	CDC73	-	-
chr13:77817186-77817300:mpeak_22556|chr13_77619628_77901177_MYCBP2_NM_-|	29.9184	-2.33057	0.870868	-2.67614	0.00744752	0.124211	0	5.39644	6.29871	18.1861	9.2011	14.5103	62.6246	84.994	34.6429	32.5435	52.1396	38.4837	9.62504	-1.84095	0.565396	-2.40635	MYCBP2	-	-
chr12:113382641-113382795:mpeak_20245|chr12_113376237_113407766_OAS3_NM_+|	140.921	-2.68474	0.524607	-5.11762	3.09415e-07	0.00052121	22.5448	45.8698	39.3669	64.1299	66.4524	33.4367	409.565	383.147	356.664	95.7163	102.234	71.9204	9.37739	-0.605753	2.09051	-2.69626	OAS3	chr12:113382698:+;chr12:113382793:+	chr12_112944893_+;chr12_112944983_+
chr12:112696292-112696358:mpeak_20194|chr12_112600327_112819896_HECTD4_NM_-|	22.7836	-1.96787	0.991259	-1.98522	0.0471198	0.329692	7.51495	6.74555	3.14936	4.78581	2.04469	10.0941	46.3422	109.278	33.0682	17.2289	17.3799	15.772	9.22678	0.0407832	1.90506	-1.86428	HECTD4	-	-
chr1:21501604-21501686:mpeak_901|chr1_21133993_21503381_EIF4G3_NM_-|	81.0634	-1.72195	0.668654	-2.57525	0.0100167	0.143352	17.5349	10.7929	16.5341	37.3293	33.7374	32.1749	145.289	263.077	80.3086	123.474	92.011	120.498	9.18033	-1.20246	0.540484	-1.74295	EIF4G3	chr1:21501609:-	chr1_21175100_-
chr20:44482372-44482560:mpeak_49507|chr20_44470595_44486048_ACOT8_NM_-|	28.0713	-2.22165	1.02365	-2.17033	0.0299817	0.253266	2.50498	8.09466	0	5.74298	18.4022	6.93969	53.8571	44.5206	75.5845	33.5007	51.1172	36.5911	9.13961	-1.5522	0.521278	-2.07347	ACOT8	chr20:44482374:-;chr20:44482466:-	chr20_45853736_-;chr20_45853827_-
chr17:78392580-78392630:mpeak_36795|chr17_78388966_78409932_ENDOV_NM_+|	20.5624	-1.71168	0.833126	-2.05453	0.0399243	0.300234	2.50498	2.69822	5.51137	9.57163	10.2234	8.20145	21.2923	48.568	48.815	30.6292	34.7597	23.9735	9.02848	-1.38567	0.409281	-1.79495	ENDOV	chr17:78392639:+	chr17_80418853_+
chr21:30402909-30403038:mpeak_50623|chr21_30396937_30426386_USP16_NM_+|	27.0146	-3.27217	1.53602	-2.13029	0.0331475	0.267803	2.50498	0	0	13.4003	13.2905	22.7117	27.5548	52.6153	3.14936	42.1152	86.8993	59.9336	9.01944	-4.30171	-1.18126	-3.12045	USP16	-	-
chr1:154107227-154107278:mpeak_5289|chr1_153965411_154127592_NUP210L_NM_-|	35.8043	-2.78325	1.28559	-2.16496	0.0303908	0.253379	6.26246	0	0	22.0147	10.2234	2.52352	86.4219	67.4555	55.1137	43.0723	93.0334	43.5308	8.98955	-2.4727	0.218362	-2.69106	NUP210L	-	-
chr1:62276546-62276600:mpeak_2645|chr1_62208148_62626579_INADL_NM_+|	16.5002	-1.96343	0.973322	-2.01724	0.0436701	0.316738	7.51495	2.69822	0.787339	3.82865	9.2011	2.52352	42.5847	40.4733	41.729	15.3146	14.3128	17.0338	8.81543	-0.499648	1.41917	-1.91882	INADL	-	-
chr1:246357143-246357253:mpeak_8309|chr1_245912966_246670644_SMYD3_NM_-|	41.3612	-1.50352	0.641111	-2.34518	0.0190177	0.200037	6.26246	10.7929	6.29871	6.70014	14.3128	17.6647	87.6744	78.2484	103.141	58.3869	58.2736	48.5778	8.67973	-0.727826	0.703402	-1.43123	SMYD3	-	-
chr2:233428984-233429068:mpeak_47887|chr2_233415296_233445613_EIF4E2_NM_+|	42.26	-2.7152	0.948033	-2.86404	0.00418277	0.0880735	6.26246	0	0	17.2289	14.3128	9.46321	56.3621	70.1537	91.3313	57.4298	98.1451	86.4306	8.62411	-2.711	-0.151723	-2.55927	EIF4E2	-	-
chr11:73221716-73221854:mpeak_14762|chr11_73117789_73309234_FAM168A_NM_-|	75.7125	-1.52398	0.561085	-2.71612	0.00660512	0.11441	3.75747	17.5384	13.3848	24.8862	28.6256	38.4837	118.987	136.26	150.382	136.874	130.86	108.511	8.54986	-1.40743	0.108484	-1.51592	FAM168A	chr11:73221777:-	-
chr6:143382680-143382738:mpeak_70036|chr6_143380499_143660775_AIG1_NM_+|	42.236	-1.75163	0.685213	-2.55633	0.0105781	0.145239	5.00996	5.39644	11.0227	10.5288	25.5586	18.2955	66.382	103.881	81.0959	46.901	71.5641	61.1954	8.5253	-1.34358	0.484479	-1.82806	AIG1	chr6:143382732:+	chr6_143061543_+;chr6_143061594_+
chr10:99125862-99125965:mpeak_11071|chr10_99116953_99161127_RRP12_NM_-|	58.3677	-1.74772	0.679717	-2.57124	0.0101335	0.143352	18.7874	8.09466	18.1088	13.4003	4.08938	7.57057	157.814	191.574	192.111	40.2008	26.581	22.0808	8.30858	0.844232	2.60731	-1.76308	RRP12	-	-
chr15:28564940-28565031:mpeak_26273|chr15_28357181_28567298_HERC2_NM_-|	38.734	-1.75233	0.862755	-2.03108	0.0422467	0.310085	1.25249	14.8402	10.2354	4.78581	11.2458	9.46321	66.382	152.449	102.354	27.7577	25.5586	38.4837	8.19717	0.0464003	1.80684	-1.76044	HERC2	chr15:28564910:-;chr15:28564937:-;chr15:28564975:-	chr15_28319794_-
chr11:77475660-77475744:mpeak_14977|chr11_77378536_77531880_RSF1_NM_-|	14.6574	-3.7494	1.56603	-2.39421	0.0166563	0.186429	3.75747	1.34911	0	14.3574	6.13407	9.46321	62.6246	26.9822	6.29871	25.8434	2.04469	17.0338	7.9869	-2.55235	1.0942	-3.64655	RSF1	-	chr11_77764615_-;chr11_77764640_-;chr11_77764675_-
chr7:143097518-143097584:mpeak_74343|chr7_143088628_143105985_EPHA1_NM_-|	32.6951	-2.34801	1.02683	-2.28667	0.0222152	0.21927	2.50498	10.7929	0	10.5288	7.15641	5.67792	66.382	60.71	130.698	32.5435	38.8491	26.497	7.73761	-0.813039	1.39697	-2.21001	EPHA1	chr7:143097524:-	chr7_143400432_-
chr20:8633815-8633958:mpeak_48545|chr20_8112911_8862268_PLCB1_NM_+|	11.3557	-3.2494	1.28079	-2.53703	0.0111796	0.149461	0	1.34911	1.57468	8.61446	5.11172	12.6176	18.7874	31.0295	7.08605	19.1433	13.2905	17.6647	7.7073	-3.17155	0.183739	-3.35529	PLCB1	chr20:8633853:+;chr20:8633942:+	chr20_8653233_+;chr20_8653306_+
chr20:47308853-47309167:mpeak_49684|chr20_47242465_47444420_PREX1_NM_-|	819.311	-1.0921	0.465385	-2.34665	0.0189431	0.200037	174.096	106.58	177.939	154.103	147.218	157.72	1317.62	2235.48	2517.91	868.147	839.345	1135.58	7.55418	-0.00134063	1.09448	-1.09582	PREX1	chr20:47308861:-;chr20:47309009:-;chr20:47309116:-	chr20_48692324_-;chr20_48692474_-;chr20_48692574_-
chr16:89835992-89836127:mpeak_32415|chr16_89805116_89883065_FANCA_NM_-|	38.3531	-1.94444	0.897647	-2.16616	0.0302992	0.253379	5.00996	12.142	9.44807	1.91433	6.13407	5.67792	111.472	109.278	148.02	17.2289	27.6033	6.3088	7.21319	0.954483	2.85017	-1.89568	FANCA	chr16:89835959:-;chr16:89836005:-	chr16_89769604_-
chr1:39893914-39893969:mpeak_1893|chr1_39549838_39951209_MACF1_NM_+|	45.9258	-1.4344	0.663483	-2.16192	0.0306243	0.254122	7.51495	1.34911	6.29871	19.1433	15.3352	18.2955	56.3621	94.4377	65.3491	76.573	83.8323	106.619	7.01496	-1.79929	-0.304944	-1.49435	MACF1	-	-
chr19:3782423-3782585:mpeak_38632|chr19_3778420_3801810_MATK_NM_-|	35.04	-2.29977	0.924823	-2.48672	0.0128928	0.160576	0	6.74555	0.787339	10.5288	21.4692	9.46321	51.3521	45.8698	68.4985	53.6011	69.5194	82.6453	6.81831	-2.46049	-0.312253	-2.14823	MATK	chr19:3782439:-;chr19:3782475:-;chr19:3782525:-	chr19_3782444_-;chr19_3782537_-
chr12:125440919-125441103:mpeak_20992|chr12_125432433_125473667_DHX37_NM_-|	82.3741	-1.22391	0.595026	-2.0569	0.0396957	0.299193	7.51495	16.1893	18.1088	14.3574	20.4469	8.83233	177.854	198.319	255.885	89.0161	101.212	80.7527	6.61538	-0.0615869	1.22187	-1.28345	DHX37	-	chr12_124956400_-;chr12_124956481_-
chr1:120539214-120539422:mpeak_4405|chr1_120459317_120612317_NOTCH2_NM_-|	209.307	-3.16094	0.476847	-6.62884	3.38339e-11	2.27973e-07	30.0598	58.0117	37.7923	67.0014	54.1843	56.7792	472.189	828.354	604.676	103.374	92.011	107.25	6.60626	-0.499729	2.65431	-3.15404	NOTCH2	chr1:120539214:-	-
chr5:179028946-179028996:mpeak_66317|chr5_178977561_179036376_RUFY1_NM_+|	77.1911	-1.98135	0.766576	-2.58468	0.00974695	0.141222	18.7874	2.69822	9.44807	44.9866	14.3128	29.0205	108.967	172.686	186.599	131.131	107.346	100.31	6.6062	-1.51356	0.466905	-1.98047	RUFY1	-	-
chr14:90389610-90389680:mpeak_25436|chr14_90263668_90421121_EFCAB11_NM_-|	40.9435	-3.71446	1.2319	-3.01522	0.00256789	0.0681199	0	5.39644	0	17.2289	26.581	3.78528	50.0996	124.118	74.0098	63.1727	69.5194	57.4101	6.52197	-3.14073	0.384888	-3.52562	EFCAB11	chr14:90389621:-	-
chr12:48080559-48080617:mpeak_17548|chr12_48057373_48099844_RPAP3_NM_-|	20.5957	-3.29013	1.61215	-2.04084	0.0412672	0.305559	2.50498	0	0	11.486	0	8.83233	21.2923	72.852	22.0455	27.7577	50.0949	30.2823	6.46782	-3.01991	0.103652	-3.12356	RPAP3	-	-
chr17:56284918-56284998:mpeak_35393|chr17_56283531_56296966_MKS1_NM_-|	70.3975	-2.19558	0.93879	-2.33874	0.019349	0.20213	0	8.09466	13.3848	10.5288	30.6703	13.8794	103.957	147.053	250.374	97.6306	69.5194	99.6791	6.42605	-1.35853	0.909998	-2.26853	MKS1	chr17:56284922:-	chr17_58207553_-
chr17:78295208-78295280:mpeak_36773|chr17_78234659_78367144_RNF213_NM_+|	146.673	-1.56831	0.691329	-2.26854	0.0232964	0.222971	11.2724	26.9822	40.9416	12.4431	22.4916	22.7117	346.94	654.319	305.487	99.5449	113.48	103.464	6.06057	0.458202	2.04575	-1.58755	RNF213	chr17:78295263:+	chr17_80321460_+
chr16:88728500-88728570:mpeak_32243|chr16_88719013_88729557_MVD_NM_-|	278.409	-1.11504	0.535812	-2.08104	0.0374305	0.287907	36.3222	32.3786	29.1315	68.9157	39.8714	63.7189	488.472	519.407	677.899	592.484	512.195	280.111	5.8034	-0.818263	0.283748	-1.10201	MVD	chr16:88728507:-	chr16_88662083_-
chr3:57271509-57271560:mpeak_54627|chr3_57261764_57303568_APPL1_NM_+|	89.8111	-2.13243	0.831901	-2.56332	0.0103676	0.143443	8.76744	0	0	11.486	14.3128	17.0338	127.754	190.225	136.997	158.889	203.447	208.821	5.78104	-2.28848	-0.328098	-1.96038	APPL1	-	-
chr16:4031547-4031662:mpeak_29441|chr16_4016967_4166186_ADCY9_NM_-|	20.9777	-3.45079	1.34482	-2.56598	0.0102884	0.143352	2.50498	0	0	3.82865	11.2458	3.78528	23.7973	66.1064	40.9416	34.4579	26.581	38.4837	5.74338	-2.91244	0.394768	-3.3072	ADCY9	chr16:4031544:-	chr16_3981544_-
chr15:63933207-63933313:mpeak_27682|chr15_63901465_64126147_HERC1_NM_-|	23.5383	-4.47045	1.29455	-3.45327	0.000553827	0.0300942	5.00996	2.69822	0	15.3146	6.13407	10.725	22.5448	143.006	36.2176	12.4431	8.17876	20.1882	5.73048	-2.06142	2.3057	-4.36712	HERC1	-	-
chr19:49711835-49711887:mpeak_41165|chr19_49661015_49714750_TRPM4_NM_+|	17.2464	-4.18602	1.73253	-2.41612	0.0156868	0.1813	0	0	3.14936	0	2.04469	8.83233	47.5947	37.7751	79.5212	1.91433	20.4469	5.67792	5.72989	-1.78815	2.556	-4.34415	TRPM4	chr19:49711890:+	chr19_49208630_+
chr8:62519018-62519125:mpeak_76065|chr8_62416068_62627199_ASPH_NM_-|	55.0491	-1.73845	0.677662	-2.56537	0.0103067	0.143352	7.51495	4.04733	7.87339	10.5288	18.4022	19.5573	92.6843	144.355	105.503	69.8729	65.4301	114.82	5.67394	-1.31893	0.453644	-1.77257	ASPH	chr8:62519020:-	chr8_61606448_-
chr3:183701528-183701592:mpeak_57574|chr3_183639189_183735727_ABCC5_NM_-|	373.931	-1.67006	0.504564	-3.30991	0.000933259	0.0383433	70.1395	60.71	48.815	54.5583	53.1619	64.3498	656.305	1328.87	1187.31	267.048	412.005	283.896	5.66321	0.0623096	1.72008	-1.65777	ABCC5	chr3:183701541:-	chr3_183983754_-
chr20:3540073-3540143:mpeak_48384|chr20_3451664_3627369_ATRN_NM_+|	38.2432	-2.66403	1.20744	-2.20634	0.02736	0.240749	0	6.74555	6.29871	12.4431	2.04469	1.26176	98.9468	198.319	66.9238	19.1433	18.4022	28.3896	5.37258	-0.271897	2.46557	-2.73747	ATRN	-	-
chr17:42489304-42489359:mpeak_34795|chr17_42478821_42580970_GPATCH8_NM_-|	46.1265	-1.62331	0.654941	-2.47856	0.0131913	0.163388	3.75747	8.09466	3.93669	11.486	8.17876	12.6176	106.462	98.4851	92.906	71.7872	53.1619	82.6453	5.30088	-1.03184	0.520831	-1.55267	GPATCH8	-	-
chr17:2030931-2031079:mpeak_32642|chr17_1964916_2207069_SMG6_NM_-|	44.7978	-1.8201	0.761082	-2.39146	0.0167813	0.187051	10.0199	1.34911	3.93669	11.486	16.3575	6.93969	76.402	90.3904	130.698	71.7872	58.2736	59.9336	5.14495	-1.18432	0.646887	-1.8312	SMG6	-	chr17_2127610_-
chr9:22008520-22008664:mpeak_78573|chr9_22006246_22009312_CDKN2B_NM_-|	32.0501	-3.10727	1.54385	-2.01267	0.0441491	0.317778	2.50498	0	0	18.1861	8.17876	1.26176	82.6644	17.5384	47.2403	48.8153	78.7205	79.4909	5.09684	-3.46319	-0.489658	-2.97353	CDKN2B	-	chr9_22008607_-
chr6:132165634-132165777:mpeak_69766|chr6_132129155_132211480_ENPP1_NM_+|	232.487	-1.30945	0.580957	-2.25395	0.0241995	0.226782	32.5648	18.8875	22.8328	28.7149	76.6758	34.6984	477.199	400.686	588.142	335.964	360.888	412.596	5.06711	-0.9152	0.40207	-1.31727	ENPP1	-	-
chr14:76525563-76525633:mpeak_25163|chr14_76452095_76550105_IFT43_NR_+mpeak_25163|chr14_76452095_76549800_IFT43_NM_+||	46.2965	-2.00846	0.956555	-2.09968	0.0357566	0.279499	1.25249	5.39644	7.08605	11.486	16.3575	17.6647	32.5648	118.722	125.187	42.1152	65.4301	112.297	4.96792	-1.72827	0.330674	-2.05894	IFT43	chr14:76525614:+	chr14_76059271_+
chr20:34131555-34131674:mpeak_49101|chr20_34129777_34145195_ERGIC3_NM_+|	329.613	-1.2442	0.44139	-2.81881	0.00482016	0.0963745	43.8372	32.3786	29.1315	69.8729	60.3183	47.316	612.468	599.005	930.634	521.654	525.485	483.254	4.91793	-0.752724	0.485129	-1.23785	ERGIC3	chr20:34131673:+	chr20_35543866_+;chr20_35543909_+
chr21:45460956-45461035:mpeak_51208|chr21_45432205_45523173_TRAPPC10_NM_+|	52.0553	-1.97936	0.771906	-2.56426	0.0103397	0.143352	6.26246	2.69822	5.51137	5.74298	27.6033	18.2955	83.9169	122.769	89.7566	93.8019	78.7205	89.585	4.88191	-1.83527	0.177594	-2.01286	TRAPPC10	chr21:45461031:+	chr21_44041149_+
chr5:125900128-125900258:mpeak_64520|chr5_125880711_125931082_ALDH7A1_NM_-|	224.518	-1.01495	0.450738	-2.25174	0.0243384	0.227451	25.0498	26.9822	29.9189	25.8434	25.5586	28.3896	418.332	737.963	554.287	283.32	272.966	265.601	4.79082	0.0385225	1.05748	-1.01895	ALDH7A1	chr5:125900133:-;chr5:125900204:-	chr5_126564441_-;chr5_126564508_-
chr17:8397041-8397089:mpeak_33190|chr17_8379266_8534079_MYH10_NM_-|	38.9689	-2.85012	1.10947	-2.5689	0.0102023	0.143352	3.75747	0	0	6.70014	7.15641	6.93969	86.4219	62.0591	87.3946	43.0723	107.346	56.7792	4.77897	-2.46849	0.187018	-2.65551	MYH10	-	-
chr10:104271956-104272010:mpeak_11366|chr10_104263718_104389822_SUFU_NM_+|	21.037	-4.08818	1.39043	-2.94023	0.00327971	0.0769988	2.50498	0	0	5.74298	9.2011	3.1544	37.5747	31.0295	88.9693	29.672	14.3128	30.2823	4.76917	-2.853	1.08523	-3.93823	SUFU	-	chr10_102512272_+;chr10_102512311_+
chr17:74734552-74734614:mpeak_36603|chr17_74732646_74774269_MFSD11_NM_+|	91.6314	-2.10757	0.805511	-2.61644	0.00888523	0.134536	5.00996	18.8875	7.87339	30.6292	28.6256	8.83233	136.522	315.692	214.156	98.5878	115.525	119.236	4.76776	-1.09968	0.999289	-2.09897	MFSD11	chr17:74734613:+	chr17_76738542_+
chr1:151866725-151866787:mpeak_5188|chr1_151847404_151882361_THEM4_NM_-|	17.6245	-2.69932	1.33281	-2.02528	0.0428383	0.312725	1.25249	1.34911	0	7.6573	9.2011	1.89264	22.5448	24.284	37.0049	25.8434	47.0279	33.4367	4.65493	-2.8495	-0.342646	-2.50685	THEM4	chr1:151866730:-	chr1_151894257_-
chr9:20875762-20875828:mpeak_78550|chr9_20658307_20995554_FOCAD_NM_+|	115.682	-1.5183	0.76639	-1.98111	0.0475794	0.330922	1.25249	17.5384	22.0455	16.2718	23.5139	17.0338	216.681	395.289	265.333	128.26	124.726	160.244	4.65476	-0.476529	1.08613	-1.56266	FOCAD	chr9:20875817:+	chr9_20875815_+
chr2:169020344-169020397:mpeak_46106|chr2_168812080_169104105_STK39_NM_-|	25.9342	-2.91413	1.30278	-2.23685	0.025296	0.230298	2.50498	0	0	3.82865	3.06703	6.3088	81.4119	43.1715	37.0049	48.8153	54.1843	30.9131	4.65067	-2.39816	0.271031	-2.66919	STK39	-	chr2_168163841_-
chr6:168363097-168363242:mpeak_70716|chr6_168227670_168370461_MLLT4_NM_+|	97.9481	-1.46523	0.629034	-2.32934	0.0198411	0.205676	12.5249	4.04733	15.7468	20.1004	18.4022	14.5103	241.731	155.148	299.189	131.131	111.436	151.411	4.64309	-0.713959	0.821111	-1.53507	MLLT4	-	chr6_167962508_+
chr15:69072746-69072818:mpeak_27957|chr15_69072481_69113261_ANP32A_NM_-|	297.581	-1.32004	0.49563	-2.66336	0.00773644	0.127012	26.3023	18.8875	37.0049	50.7296	48.0502	78.2292	557.359	580.117	651.917	444.123	425.295	652.961	4.59345	-1.1067	0.233141	-1.33985	ANP32A	chr15:69072749:-	chr15_68780410_-;chr15_68780468_-
chr12:46287275-46287330:mpeak_17457|chr12_46123619_46298716_ARID2_NM_+|	25.6611	-2.98861	1.31644	-2.27022	0.0231942	0.222942	2.50498	0	0	4.78581	3.06703	4.41616	63.877	79.5975	28.3442	29.672	44.9832	46.6852	4.37376	-2.29215	0.501828	-2.79397	ARID2	-	-
chr8:26252770-26252915:mpeak_75247|chr8_26240522_26267879_BNIP3L_NM_+|	76.4041	-1.92711	0.901613	-2.1374	0.0325657	0.265282	2.50498	6.74555	0	23.9291	21.4692	6.93969	107.714	83.6448	127.549	176.118	169.709	190.526	4.35104	-2.50025	-0.750043	-1.75021	BNIP3L	chr8:26252914:+	chr8_26395396_+
chr14:91238828-91238886:mpeak_25479|chr14_91007933_91282761_TTC7B_NM_-|	11.5907	-3.33976	1.68312	-1.98427	0.0472263	0.330094	0	1.34911	0.787339	8.61446	0	5.67792	12.5249	52.6153	8.66073	14.3574	14.3128	20.1882	4.34232	-2.74196	0.595031	-3.33699	TTC7B	chr14:91238835:-	chr14_90772492_-
chr15:44850080-44850137:mpeak_26875|chr15_44829265_44853215_EIF3J_NM_+|	76.4382	-1.62505	0.826303	-1.96665	0.0492231	0.335693	2.50498	5.39644	0	17.2289	17.3799	9.46321	66.382	102.532	110.227	177.075	219.804	189.264	4.24592	-2.47968	-1.07026	-1.40942	EIF3J	chr15:44850135:+	chr15_44557937_+
chr6:136732749-136732826:mpeak_69885|chr6_136665376_136871957_MAP7_NM_-|	143.978	-1.42922	0.595168	-2.40138	0.0163335	0.184396	8.76744	13.4911	20.4708	28.7149	17.3799	24.6043	219.186	451.952	338.556	180.904	230.028	193.68	4.23191	-0.726464	0.739837	-1.4663	MAP7	-	-
chr17:49098513-49098680:mpeak_35213|chr17_49043748_49198226_SPAG9_NM_-|	91.8134	-1.63612	0.632996	-2.58471	0.00974596	0.141222	15.0299	5.39644	6.29871	22.0147	16.3575	12.6176	211.671	271.171	150.382	114.86	130.86	145.103	4.22047	-0.932018	0.696204	-1.62822	SPAG9	-	-
chr13:103441359-103441449:mpeak_22840|chr13_103436862_103451404_KDELC1_NM_-|	14.0048	-4.84125	1.96167	-2.46792	0.0135901	0.166491	0	1.34911	0	10.5288	8.17876	0	5.00996	35.0769	55.9011	8.61446	19.4245	23.9735	4.2165	-3.79354	0.883995	-4.67753	KDELC1	-	-
chrX:1560972-1561031:mpeak_81596|chrX_1522382_1572655_ASMTL_NM_-|	34.2963	-1.86102	0.900179	-2.06739	0.0386978	0.294628	1.25249	4.04733	6.29871	5.74298	6.13407	4.41616	62.6246	72.852	146.445	41.158	21.4692	39.1146	4.1141	-0.490328	1.47038	-1.96071	ASMTL	-	chrX_1442088_-
chrX:135584925-135585096:mpeak_83724|chrX_135579237_135592966_HTATSF1_NM_+|	178.423	-1.01975	0.483177	-2.11051	0.0348145	0.276302	12.5249	16.1893	16.5341	35.415	16.3575	23.9735	373.242	415.526	322.022	279.491	303.636	326.165	4.07353	-0.743304	0.288769	-1.03207	HTATSF1	-	chrX_136502894_+;chrX_136502921_+
chr11:35211735-35211795:mpeak_13236|chr11_35160416_35250675_CD44_NM_+|	156.586	-1.11526	0.47947	-2.32604	0.0200165	0.206858	11.2724	25.6331	17.3215	13.4003	13.2905	12.6176	385.767	492.425	457.444	140.703	161.53	147.626	4.06001	0.464174	1.56998	-1.10581	CD44	chr11:35211789:+	chr11_35190206_+;chr11_35190241_+
chr1:111492692-111492834:mpeak_3843|chr1_111491021_111506566_LRIF1_NM_-|	19.3918	-4.36492	1.60607	-2.71775	0.00657266	0.11441	1.25249	0	0	4.78581	13.2905	10.725	63.877	21.5858	7.87339	29.672	31.6927	47.9469	4.02574	-4.52326	-0.227938	-4.29532	LRIF1	chr1:111492783:-	chr1_110950144_-
chr5:10285728-10285878:mpeak_62129|chr5_10280744_10308168_CMBL_NM_-|	145.818	-1.08361	0.532201	-2.03609	0.0417414	0.308055	13.7774	17.5384	3.93669	21.0576	20.4469	18.9264	311.87	281.964	292.103	251.734	251.497	264.97	3.97912	-0.777559	0.205722	-0.983281	CMBL	-	chr5_10285726_-
chr5:176893902-176894023:mpeak_66214|chr5_176884504_176900694_DBN1_NM_-|	63.1831	-2.37599	0.685734	-3.46489	0.000530456	0.0297029	5.00996	2.69822	6.29871	29.672	19.4245	18.2955	103.957	156.497	99.2047	106.245	133.927	76.9674	3.8945	-2.26644	0.181509	-2.44795	DBN1	chr5:176893932:-	-
chr1:59002179-59002278:mpeak_2580|chr1_58946846_59012471_OMA1_NM_-|	11.5927	-3.63752	1.62919	-2.23271	0.025568	0.231244	0	0	0.787339	7.6573	7.15641	0.63088	12.5249	29.6804	18.8961	28.7149	20.4469	12.6176	3.86573	-4.29397	-0.0159183	-4.27806	OMA1	-	-
chr3:27465597-27465648:mpeak_53594|chr3_27418336_27525911_SLC4A7_NM_-|	40.5534	-2.87385	0.901707	-3.18712	0.00143698	0.0481853	6.26246	1.34911	3.93669	18.1861	7.15641	10.0941	177.854	76.8993	56.6884	44.0295	41.9161	42.269	3.708	-1.61756	1.2804	-2.89796	SLC4A7	-	-
chr20:31973328-31973382:mpeak_48990|chr20_31946929_31989375_CDK5RAP1_NM_-|	29.9158	-1.99449	0.999876	-1.99474	0.0460713	0.324716	2.50498	0	2.36202	3.82865	9.2011	2.52352	48.8472	56.6626	92.1186	46.901	42.9385	51.1013	3.69405	-1.67611	0.487702	-2.16382	CDK5RAP1	chr20:31973330:-	chr20_33385530_-
chr6:96970779-96970862:mpeak_69085|chr6_96969701_97001160_UFL1_NM_+|	33.4518	-3.44413	1.3348	-2.58025	0.00987281	0.142448	2.50498	0	0	8.61446	6.13407	5.04704	65.1295	113.325	30.7062	37.3293	61.3407	71.2895	3.5929	-2.98231	0.299423	-3.28173	UFL1	chr6:96970840:+	chr6_96522963_+
chr12:122248849-122248908:mpeak_20674|chr12_122242637_122267971_SETD1B_NM_+|	39.3289	-3.86008	1.22621	-3.14799	0.00164399	0.0535132	0	2.69822	0	2.87149	15.3352	11.3558	70.1395	84.994	72.4352	59.3441	77.6982	75.0748	3.55702	-3.45369	0.101441	-3.55513	SETD1B	chr12:122248907:+	chr12_121810995_+
chr2:62114990-62115147:mpeak_43572|chr2_62095841_62115806_CCT4_NM_-|	1015.75	-1.33196	0.50168	-2.65501	0.00793064	0.128454	107.714	97.1359	66.9238	87.1018	131.882	116.082	1655.79	3572.44	2533.66	1102.65	1434.35	1283.21	3.50139	-0.302039	1.02276	-1.3248	CCT4	chr2:62115011:-;chr2:62115073:-	chr2_61887940_-
chr6:157258292-157258347:mpeak_70449|chr6_157099063_157527300_ARID1B_NM_+|	39.7133	-2.18233	1.05993	-2.05893	0.0395005	0.299193	1.25249	0	3.93669	16.2718	6.13407	3.78528	85.1694	103.881	40.9416	74.6587	57.2513	83.2762	3.38436	-2.3355	0.0960013	-2.4315	ARID1B	-	chr6_156937215_+
chr2:174077475-174077646:mpeak_46299|chr2_173940564_174130777_ZAK_NM_+|	89.3476	-1.84418	0.636405	-2.89782	0.00375771	0.0835626	6.26246	2.69822	10.2354	16.2718	22.4916	16.4029	177.854	192.923	201.559	91.8876	167.665	165.922	3.35399	-1.52297	0.427791	-1.95076	ZAK	-	chr2_173212839_+
chr7:106924550-106924600:mpeak_73519|chr7_106844075_107204959_COG5_NM_-|	36.717	-3.04802	0.811984	-3.75379	0.000174184	0.0175172	1.25249	5.39644	2.36202	13.4003	5.11172	13.8794	77.6545	105.231	89.7566	45.9438	49.0725	31.544	3.30505	-1.84586	1.10718	-2.95304	COG5	-	-
chr11:61916203-61916258:mpeak_13799|chr11_61891444_61919233_INCENP_NM_+|	10.3976	-4.31432	1.66765	-2.58707	0.0096796	0.141222	0	0	0.787339	4.78581	2.04469	5.67792	7.51495	16.1893	48.0277	17.2289	14.3128	8.20145	3.29284	-3.98977	0.851908	-4.84168	INCENP	-	-
chr14:51390444-51390624:mpeak_23996|chr14_51372274_51411248_PYGL_NM_-|	69.3882	-1.4158	0.690789	-2.04954	0.0404097	0.301529	8.76744	4.04733	5.51137	5.74298	5.11172	8.83233	149.046	178.083	233.84	61.2584	74.6312	97.7865	3.26687	-0.103342	1.26341	-1.36675	PYGL	chr14:51390463:-;chr14:51390530:-;chr14:51390613:-	chr14_50923746_-;chr14_50923813_-
chr10:35320498-35320556:mpeak_9402|chr10_35299370_35379570_CUL2_NM_-|	16.3667	-4.56514	1.66788	-2.7371	0.0061984	0.110915	1.25249	0	0	12.4431	0	3.1544	21.2923	56.6626	37.7923	19.1433	19.4245	25.2352	3.24627	-3.63844	0.859281	-4.49773	CUL2	-	chr10_35031609_-
chr16:19576231-19576280:mpeak_30042|chr16_19566736_19711699_C16orf62_NM_+|	102.176	-2.56782	0.940773	-2.72948	0.00634343	0.111951	8.76744	8.09466	0	24.8862	11.2458	9.46321	201.651	245.538	333.832	88.059	186.067	108.511	3.23847	-1.4351	1.02938	-2.46448	C16orf62	-	-
chr3:167742302-167742384:mpeak_57170|chr3_167728206_167813713_GOLIM4_NM_-|	15.1578	-3.55302	1.55	-2.29228	0.0218896	0.21779	0	0	0.787339	5.74298	3.06703	8.20145	10.0199	37.7751	25.1948	40.2008	14.3128	36.5911	3.23609	-4.43338	-0.31983	-4.11355	GOLIM4	-	chr3_168024575_-
chr10:14891610-14891677:mpeak_8825|chr10_14880158_14913526_HSPA14_NM_+|	47.5787	-2.13999	1.07458	-1.99146	0.0464299	0.32622	0	0	2.36202	2.87149	11.2458	6.3088	65.1295	80.9466	75.5845	82.316	131.882	112.297	3.1968	-3.11232	-0.558709	-2.55361	HSPA14	chr10:14891668:+	chr10_14849668_+
chr8:68204075-68204125:mpeak_76207|chr8_68111333_68255912_ARFGEF1_NM_-|	17.7208	-4.86317	1.90894	-2.54758	0.0108472	0.146764	0	1.34911	0	5.74298	0	11.9867	11.2724	99.8342	15.7468	14.3574	29.648	22.7117	3.19056	-3.71609	0.927033	-4.64312	ARFGEF1	-	-
chr14:73567698-73567759:mpeak_24915|chr14_73525220_73586420_RBM25_NM_+|	52.5123	-2.03502	0.959597	-2.1207	0.0339467	0.271332	2.50498	5.39644	0	1.91433	6.13407	8.20145	91.4319	182.13	105.503	78.4873	74.6312	73.813	3.12668	-1.04024	0.740189	-1.78043	RBM25	-	chr14_73101077_+
chr10:114210184-114210234:mpeak_11582|chr10_114206755_114575048_VTI1A_NM_+|	27.8832	-3.20485	1.51724	-2.11228	0.0346621	0.275417	1.25249	0	0	10.5288	7.15641	0.63088	30.0598	39.1242	51.177	59.3441	84.8546	50.4704	3.12184	-3.87024	-0.693656	-3.17658	VTI1A	-	-
chr17:57780390-57780444:mpeak_35585|chr17_57775339_57784959_PTRH2_NM_-|	72.2904	-2.65136	0.929149	-2.85353	0.00432358	0.0896378	6.26246	2.69822	0	25.8434	8.17876	10.0941	174.096	111.976	148.807	144.532	144.151	90.8468	3.09074	-2.29963	0.196406	-2.49604	PTRH2	-	-
chr17:35766288-35766371:mpeak_34249|chr17_35444374_35766902_ACACA_NM_-|	59.0801	-3.66141	1.04954	-3.4886	0.000485557	0.0284494	0	0	4.72403	22.9719	5.11172	6.3088	131.512	191.574	136.21	67.9585	80.7652	61.8263	3.08562	-2.864	1.12526	-3.98926	ACACA	chr17:35766301:-	chr17_37406212_-
chr1:24298053-24298107:mpeak_1060|chr1_24294213_24306953_SRSF10_NR_-mpeak_1060|chr1_24297929_24306953_SRSF10_NM_-||	59.9303	-2.32723	1.05721	-2.20128	0.027716	0.242218	0	4.04733	0	2.87149	3.06703	6.3088	101.452	133.562	159.042	111.988	88.944	107.881	3.08129	-1.59742	0.35167	-1.94909	SRSF10	chr1:24298040:-;chr1:24298082:-	-
chr1:43876380-43876430:mpeak_2090|chr1_43855555_43916007_SZT2_NM_+|	11.4598	-4.07211	1.53041	-2.6608	0.00779546	0.127012	0	0	0.787339	3.82865	3.06703	5.04704	28.8073	37.7751	11.0227	20.1004	16.3575	10.725	3.04363	-3.923	0.717888	-4.64089	SZT2	-	chr1_43410804_+
chr11:13443346-13443396:mpeak_12756|chr11_13410688_13484844_BTBD10_NM_-|	40.246	-3.41136	1.3461	-2.53426	0.0112687	0.149542	2.50498	0	0	5.74298	3.06703	10.0941	38.8272	125.467	87.3946	44.0295	92.011	73.813	2.98581	-2.91583	0.26226	-3.17809	BTBD10	-	-
chr2:234464825-234464879:mpeak_47942|chr2_234386149_234474236_USP40_NM_-|	52.2061	-2.87206	1.21815	-2.35773	0.0183871	0.197317	2.50498	0	0	1.91433	6.13407	11.9867	97.6943	82.2957	79.5212	114.86	113.48	116.082	2.89581	-2.99966	-0.408379	-2.59128	USP40	chr2:234464824:-	chr2_233556179_-
chr2:234418736-234418788:mpeak_47939|chr2_234386149_234474236_USP40_NM_-|	51.9686	-2.55376	1.15762	-2.20605	0.0273808	0.240749	2.50498	0	0	7.6573	5.11172	4.41616	97.6943	82.2957	79.5212	114.86	113.48	116.082	2.89581	-2.77829	-0.408379	-2.36991	USP40	-	-
chr2:234465398-234465474:mpeak_47943|chr2_234386149_234474236_USP40_NM_-|	51.6822	-2.37642	1.2099	-1.96415	0.0495129	0.335769	2.50498	0	0	2.87149	2.04469	8.83233	97.6943	82.2957	79.5212	114.86	113.48	116.082	2.89581	-2.4564	-0.408379	-2.04802	USP40	chr2:234465394:-;chr2:234465423:-	-
chr6:151234034-151234091:mpeak_70285|chr6_151186814_151422661_MTHFD1L_NM_+|	65.819	-1.59632	0.76207	-2.09472	0.0361963	0.281629	8.76744	4.04733	3.93669	2.87149	7.15641	5.04704	131.512	241.491	208.645	44.9866	61.3407	70.0277	2.88	0.152134	1.72166	-1.56953	MTHFD1L	chr6:151234092:+	chr6_150912949_+
chr9:35729034-35729188:mpeak_78840|chr9_35697913_35732392_TLN1_NM_-|	42.2031	-5.34301	1.08028	-4.94595	7.57731e-07	0.000850931	3.75747	0	0	5.74298	9.2011	11.3558	98.9468	159.195	139.359	26.8006	17.3799	34.6984	2.83582	-2.80722	2.33325	-5.14047	TLN1	chr9:35729049:-;chr9:35729084:-	chr9_35729053_-;chr9_35729089_-;chr9_35729161_-
chr9:97767814-97767893:mpeak_79675|chr9_97488950_97848963_C9orf3_NM_+|	41.938	-2.68569	0.964348	-2.78498	0.00535303	0.101864	1.25249	2.69822	2.36202	10.5288	14.3128	17.6647	53.8571	121.42	48.0277	55.5154	58.2736	117.344	2.82696	-2.75134	-0.0497086	-2.70163	C9orf3	-	-
chr1:16920091-16920209:mpeak_718|chr1_16890681_16940100_NBPF1_NM_-|	42.327	-2.21302	1.09976	-2.01228	0.0441909	0.317778	2.50498	1.34911	0	3.82865	9.2011	7.57057	46.3422	106.58	53.539	76.573	95.0781	105.357	2.80011	-2.4182	-0.424059	-1.99414	NBPF1	chr1:16920150:-	-
chr3:119720889-119721051:mpeak_55633|chr3_119545702_119813264_GSK3B_NM_-|	49.6309	-2.11679	0.872647	-2.42572	0.0152782	0.178723	3.75747	2.69822	2.36202	4.78581	13.2905	10.725	147.794	113.325	54.3264	85.1875	87.9216	69.3969	2.79532	-1.70766	0.379371	-2.08703	GSK3B	-	-
chr3:193376735-193376792:mpeak_57846|chr3_193310932_193412394_OPA1_NM_+|	101.042	-2.26692	1.06226	-2.13405	0.032839	0.266268	0	5.39644	0	13.4003	5.11172	4.41616	139.027	295.455	148.02	184.732	194.245	222.701	2.77928	-2.08704	-0.0467318	-2.04031	OPA1	-	-
chr3:37214137-37214197:mpeak_53822|chr3_37095452_37217851_LRRFIP2_NM_-|	33.9042	-3.03885	1.4462	-2.10127	0.0356172	0.279186	0	1.34911	0	0.957163	5.11172	9.46321	50.0996	64.7573	31.4936	80.4017	65.4301	97.7865	2.76551	-3.52517	-0.735194	-2.78998	LRRFIP2	-	-
chr12:27790202-27790276:mpeak_17099|chr12_27677044_27845728_PPFIBP1_NM_+|	73.127	-2.39271	0.851639	-2.80953	0.00496136	0.0977807	1.25249	8.09466	3.93669	14.3574	20.4469	12.6176	80.1594	202.367	200.771	66.0442	148.24	119.236	2.74859	-1.83588	0.535135	-2.37102	PPFIBP1	chr12:27790291:+	-
chr20:30814659-30814772:mpeak_48937|chr20_30795695_30822275_POFUT1_NM_+|	48.1438	-2.22363	0.807039	-2.75529	0.005864	0.107369	6.26246	1.34911	1.57468	11.486	5.11172	7.57057	125.249	78.2484	137.784	61.2584	70.5418	71.2895	2.69169	-1.39557	0.748847	-2.14441	POFUT1	chr20:30814718:+;chr20:30814774:+	chr20_32226914_+;chr20_32226969_+
chr14:24451951-24452091:mpeak_23336|chr14_24439082_24475094_DHRS4L2_NM_+|	122.181	-2.02437	0.989254	-2.04636	0.0407206	0.303513	6.26246	0	0	10.5288	2.04469	10.725	231.711	178.083	290.528	281.406	250.474	204.405	2.68268	-1.89543	-0.0722481	-1.82319	DHRS4L2	chr14:24452093:+	chr14_23982882_+
chr14:51388804-51388859:mpeak_23995|chr14_51372274_51411248_PYGL_NM_-|	68.967	-2.2353	0.828501	-2.698	0.00697571	0.118693	0	1.34911	8.66073	8.61446	6.13407	8.20145	149.046	178.083	233.84	61.2584	74.6312	97.7865	2.67658	-1.19707	1.26341	-2.46048	PYGL	chr14:51388802:-	chr14_50922086_-
chr16:74695976-74696112:mpeak_31782|chr16_74657969_74700779_RFWD3_NM_-|	187.003	-1.55178	0.609038	-2.54792	0.0108367	0.146764	18.7874	5.39644	4.72403	26.8006	20.4469	30.2823	373.242	311.644	406.267	311.078	429.385	305.977	2.64929	-1.42329	0.0603652	-1.48365	RFWD3	-	-
chr16:69418109-69418181:mpeak_31470|chr16_69390959_69419891_TERF2_NM_-|	52.7485	-2.44683	0.897372	-2.72666	0.00639783	0.112555	2.50498	0	3.14936	5.74298	13.2905	10.0941	82.6644	143.006	97.63	67.9585	80.7652	126.176	2.62342	-2.36495	0.233968	-2.59892	TERF2	chr16:69418112:-	chr16_69384213_-
chr14:67783538-67783611:mpeak_24647|chr14_67708011_67799496_MPP5_NM_+|	64.5095	-2.96489	1.24558	-2.38034	0.0172968	0.189814	0	2.69822	0	5.74298	13.2905	5.67792	145.289	101.183	63.7744	111.031	180.955	144.472	2.6091	-3.1951	-0.492425	-2.70267	MPP5	chr14:67783621:+	chr14_67316894_+
chr14:89056268-89056323:mpeak_25405|chr14_89029252_89078088_ZC3H14_NM_+|	45.4229	-2.4041	0.83766	-2.87002	0.00410449	0.0880578	3.75747	2.69822	1.57468	5.74298	10.2234	10.0941	76.402	153.799	79.5212	66.0442	66.4524	68.766	2.59277	-1.69833	0.621894	-2.32022	ZC3H14	-	-
chr16:19626269-19626342:mpeak_30046|chr16_19566736_19711699_C16orf62_NM_+|	100.958	-3.89444	1.00044	-3.89272	9.91263e-05	0.0120007	0	6.74555	0	16.2718	7.15641	17.6647	201.651	245.538	333.832	88.059	186.067	108.511	2.59105	-2.60688	1.02938	-3.63626	C16orf62	chr16:19626339:+	chr16_19615016_+
chr6:43321913-43321969:mpeak_68147|chr6_43308240_43337181_ZNF318_NM_-|	46.6621	-2.38434	1.04728	-2.2767	0.0228043	0.22053	1.25249	4.04733	0	6.70014	1.02234	8.83233	122.744	109.278	77.1592	88.059	82.8099	58.041	2.57122	-1.64323	0.433673	-2.07691	ZNF318	chr6:43321892:-;chr6:43321917:-	chr6_43354180_-
chr19:39948310-39948376:mpeak_40514|chr19_39936185_39966895_SUPT5H_NM_+|	395.579	-1.40934	0.599078	-2.35252	0.0186467	0.199114	32.5648	10.7929	30.7062	40.2008	46.0055	25.8661	665.073	959.217	1303.83	531.225	614.429	487.04	2.5294	-0.59759	0.842722	-1.44031	SUPT5H	chr19:39948380:+	-
chr10:95228178-95228231:mpeak_10891|chr10_95066758_95242074_MYOF_NM_-|	43.9768	-2.70382	1.26218	-2.14219	0.0321782	0.262808	3.75747	5.39644	0.787339	11.486	2.04469	3.1544	36.3222	277.917	80.3086	24.8862	41.9161	39.7455	2.51966	-0.747056	1.8887	-2.63575	MYOF	-	-
chr1:148565741-148565870:mpeak_4765|chr1_148558187_148594396_NBPF15_NM_+|	27.1763	-3.82693	1.4734	-2.59736	0.00939443	0.139734	1.25249	0	0	1.91433	4.08938	10.725	32.5648	74.2011	44.091	37.3293	56.229	63.7189	2.49075	-3.73945	-0.0601299	-3.67932	NBPF15	-	-
chr7:132938700-132938774:mpeak_74028|chr7_132937822_133749043_EXOC4_NM_+|	175.972	-1.84451	0.683013	-2.70055	0.00692253	0.118386	2.50498	21.5858	9.44807	20.1004	12.2681	23.9735	348.193	465.443	549.562	189.518	224.916	244.151	2.4603	-0.748379	1.04955	-1.79793	EXOC4	chr7:132938755:+	chr7_133253999_+
chr19:46292650-46292706:mpeak_40889|chr19_46287548_46296060_DMWD_NM_-|	41.8415	-3.00362	1.13562	-2.64492	0.00817099	0.129544	1.25249	2.69822	0	7.6573	14.3128	3.78528	58.8671	84.994	99.992	91.8876	89.9663	46.6852	2.43018	-2.70469	0.0935711	-2.79826	DMWD	chr19:46292656:-	chr19_45789400_-
chr4:3105544-3105604:mpeak_58460|chr4_3076236_3241572_HTT_NM_+|	230.771	-1.37617	0.571987	-2.40596	0.0161302	0.182908	25.0498	6.74555	18.1088	16.2718	13.2905	10.0941	532.309	693.443	838.516	190.475	208.558	216.392	2.41752	0.331609	1.74597	-1.41436	HTT	-	-
chr16:71811524-71811728:mpeak_31663|chr16_71767062_71842976_AP1G1_NM_-|	391.8	-1.56962	0.466433	-3.36516	0.000764985	0.0343631	23.7973	21.5858	29.9189	50.7296	21.4692	28.3896	991.973	1091.43	1054.25	436.466	486.636	464.959	2.39995	-0.417706	1.17661	-1.59432	AP1G1	chr16:71811540:-	-
chr9:20673844-20673920:mpeak_78544|chr9_20658307_20995554_FOCAD_NM_+|	112.65	-1.95454	0.662951	-2.94824	0.00319585	0.07695	8.76744	2.69822	9.44807	9.57163	19.4245	11.3558	216.681	395.289	265.333	128.26	124.726	160.244	2.38386	-0.948191	1.08613	-2.03432	FOCAD	chr9:20673897:+	chr9_20673907_+
chr1:120537032-120537104:mpeak_4403|chr1_120459317_120612317_NOTCH2_NM_-|	192.43	-3.01087	0.903089	-3.33397	0.00085616	0.0362818	27.5548	2.69822	14.1721	31.5864	5.11172	20.1882	472.189	828.354	604.676	103.374	92.011	107.25	2.33176	-0.356705	2.65431	-3.01101	NOTCH2	-	-
chr6:17817417-17817473:mpeak_66927|chr6_17761108_17987854_KIF13A_NM_-|	52.4914	-3.09076	0.849162	-3.63977	0.000272879	0.0207341	2.50498	2.69822	0.787339	15.3146	14.3128	24.6043	75.1495	101.183	84.2453	93.8019	82.8099	132.485	2.29894	-3.17838	-0.246343	-2.93204	KIF13A	-	chr6_17817173_-
chr1:10205188-10205256:mpeak_433|chr1_10093040_10239952_UBE4B_NM_+|	67.891	-2.50329	1.06499	-2.35052	0.0187472	0.199282	0	0	3.93669	5.74298	9.2011	0.63088	154.056	171.337	199.197	80.4017	93.0334	97.1556	2.2513	-1.98417	0.955079	-2.93925	UBE4B	chr1:10205242:+	chr1_10145180_+
chr6:151256731-151256886:mpeak_70286|chr6_151186814_151422661_MTHFD1L_NM_+|	67.0152	-3.07455	0.714264	-4.3045	1.67365e-05	0.00593528	6.26246	2.69822	3.93669	10.5288	13.2905	9.46321	131.512	241.491	208.645	44.9866	61.3407	70.0277	2.21739	-1.36769	1.72166	-3.08935	MTHFD1L	-	-
chr8:62571365-62571458:mpeak_76080|chr8_62416068_62627199_ASPH_NM_-|	51.1692	-3.60028	1.23292	-2.92014	0.00349879	0.0799148	2.50498	0	0	2.87149	7.15641	8.83233	92.6843	144.355	105.503	69.8729	65.4301	114.82	2.19387	-2.91247	0.453644	-3.36612	ASPH	chr8:62571400:-	chr8_61658842_-
chr10:105778534-105778586:mpeak_11462|chr10_105726942_105785331_SLK_NM_+|	55.3908	-1.96477	0.985779	-1.99311	0.0462493	0.32529	3.75747	1.34911	0.787339	10.5288	10.2234	8.20145	50.0996	156.497	62.9871	96.6734	129.838	133.747	2.18631	-2.29645	-0.418297	-1.87815	SLK	-	-
chr19:39943977-39944101:mpeak_40513|chr19_39936185_39966895_SUPT5H_NM_+|	392.685	-1.28797	0.51116	-2.51969	0.0117458	0.153378	18.7874	20.2367	24.4075	32.5435	32.715	22.7117	665.073	959.217	1303.83	531.225	614.429	487.04	2.16629	-0.471816	0.842722	-1.31454	SUPT5H	-	-
chr7:763629-763681:mpeak_70821|chr7_590239_767313_PRKAR1B_NM_-|	125.177	-1.51225	0.712475	-2.12253	0.0337929	0.270424	7.51495	2.69822	5.51137	15.3146	6.13407	21.4499	214.176	209.112	308.637	292.892	221.849	196.835	2.14838	-1.44791	0.0406793	-1.48859	PRKAR1B	-	-
chr6:99994264-99994330:mpeak_69162|chr6_99991485_100016690_CCNC_NM_-|	176.055	-2.00493	0.964827	-2.07802	0.0377078	0.289709	6.26246	0	0	18.1861	6.13407	6.3088	310.618	352.118	222.03	325.435	428.362	437.2	2.12343	-2.2901	-0.428804	-1.86129	CCNC	-	-
chr4:6580483-6580615:mpeak_58546|chr4_6576900_6622914_MAN2B2_NM_+|	114.753	-1.7188	0.812779	-2.11471	0.0344543	0.274413	2.50498	1.34911	15.7468	12.4431	6.13407	11.9867	265.528	279.266	381.859	146.446	112.458	141.317	2.11523	-0.640912	1.21123	-1.85214	MAN2B2	chr4:6580535:+;chr4:6580600:+	chr4_6578806_+;chr4_6578872_+
chr14:75593035-75593103:mpeak_25112|chr14_75551389_75593778_NEK9_NM_-|	56.7458	-2.60464	1.09649	-2.37544	0.0175279	0.190867	0	0	3.14936	0	4.08938	6.93969	117.734	167.29	166.128	56.4726	82.8099	76.3365	2.09421	-1.80818	1.06513	-2.87331	NEK9	chr14:75593045:-;chr14:75593087:-	chr14_75126343_-
chr19:39330437-39330594:mpeak_40452|chr19_39327420_39342979_HNRNPL_NM_-mpeak_40452|chr19_39327420_39342979_HNRNPL_NM_-||	183.31	-2.20118	1.01692	-2.16455	0.030422	0.253379	5.00996	0	14.9594	5.74298	28.6256	13.8794	264.276	523.455	644.043	197.176	208.558	293.99	2.0921	-1.27268	1.03295	-2.30562	HNRNPL	chr19:39330440:-;chr19:39330493:-	chr19_38839851_-
chr2:101911504-101911658:mpeak_44749|chr2_101893743_101925178_RNF149_NM_-|	143.364	-1.87722	0.843865	-2.22455	0.0261114	0.234313	0	0	7.08605	8.61446	9.2011	4.41616	281.811	303.55	431.462	191.433	252.519	230.271	2.09065	-1.64957	0.592769	-2.24234	RNF149	-	chr2_101295146_-
chr2:159956415-159956465:mpeak_45933|chr2_159825145_160086088_TANC1_NM_+|	12.9982	-5.37122	1.49182	-3.60045	0.000317662	0.022767	0	0	0.787339	6.70014	3.06703	3.1544	30.0598	31.0295	51.9644	11.486	5.11172	12.6176	2.08929	-4.03665	1.95221	-5.98887	TANC1	chr2:159956469:+	chr2_159099953_+
chr17:78076476-78076536:mpeak_36744|chr17_78075354_78093070_GAA_NM_+|	164.339	-3.29355	0.897499	-3.66969	0.000242841	0.019678	6.26246	0	14.9594	30.6292	13.2905	9.46321	366.98	488.378	678.686	132.088	103.257	128.069	2.07509	-1.33082	2.07765	-3.40848	GAA	chr17:78076532:+	-
chr5:148928891-148928971:mpeak_65544|chr5_148876423_148931115_CSNK1A1_NM_-|	100.137	-2.63284	1.01568	-2.59218	0.00953686	0.14092	3.75747	0	0	11.486	5.11172	6.93969	146.541	175.384	222.03	190.475	185.044	254.876	2.07231	-2.64712	-0.212769	-2.43435	CSNK1A1	chr5:148928908:-	chr5_149549330_-
chr6:160172144-160172203:mpeak_70574|chr6_160148029_160176059_WTAP_NM_+|	22.4865	-4.01986	1.46722	-2.73977	0.00614814	0.110765	0	0	0.787339	4.78581	9.2011	8.20145	21.2923	71.5028	22.0455	40.2008	47.0279	44.7925	2.05678	-4.81667	-0.201136	-4.61554	WTAP	chr6:160172198:+	chr6_159751162_+
chr9:20721471-20721524:mpeak_78548|chr9_20658307_20995554_FOCAD_NM_+|	110.052	-1.84144	0.93261	-1.9745	0.0483247	0.333211	2.50498	9.44377	0	2.87149	10.2234	5.04704	216.681	395.289	265.333	128.26	124.726	160.244	2.04298	-0.602471	1.08613	-1.6886	FOCAD	-	-
chrX:48664206-48664264:mpeak_82353|chrX_48660486_48682953_HDAC6_NM_+|	35.6489	-3.17514	1.10673	-2.86895	0.00411838	0.0880578	2.50498	1.34911	0	4.78581	3.06703	5.04704	101.452	76.8993	107.078	23.9291	48.0502	53.6248	2.02542	-1.7429	1.18425	-2.92714	HDAC6	chrX:48664260:+	chrX_48805852_+
chr8:110255713-110255917:mpeak_77294|chr8_110255530_110346350_NUDCD1_NM_-|	53.4929	-3.44434	1.45279	-2.37085	0.0177474	0.191946	2.50498	0	0	0	3.06703	11.9867	90.1794	178.083	107.865	67.0014	82.8099	98.4174	1.99798	-2.58725	0.599552	-3.1868	NUDCD1	chr8:110255710:-	chr8_109243484_-;chr8_109243632_-
chr3:63910592-63910685:mpeak_54789|chr3_63850232_63985125_ATXN7_NM_+|	23.3205	-3.06434	1.5281	-2.00533	0.0449277	0.320681	0	0	0.787339	4.78581	3.06703	4.41616	13.7774	47.2189	57.4757	53.6011	26.581	68.1351	1.99373	-3.96189	-0.324139	-3.63775	ATXN7	-	chr3_63925009_+
chr1:155197035-155197128:mpeak_5418|chr1_155184264_155197325_GBAP1_NR_-|	94.5509	-2.04292	0.826485	-2.47181	0.013443	0.165592	2.50498	6.74555	0	2.87149	7.15641	8.20145	230.458	229.349	241.713	139.746	160.508	105.357	1.97796	-0.978654	0.790388	-1.76904	GBAP1	chr1:155197033:-	chr1_155227234_-
chr3:183718444-183718579:mpeak_57576|chr3_183639189_183735727_ABCC5_NM_-|	358.711	-2.49631	1.03573	-2.4102	0.0159438	0.182084	1.25249	47.2189	14.1721	21.0576	58.2736	27.1279	656.305	1328.87	1187.31	267.048	412.005	283.896	1.97459	-0.765063	1.72008	-2.48515	ABCC5	chr3:183718451:-	chr3_184000664_-;chr3_184000741_-
chr6:33677093-33677315:mpeak_67723|chr6_33665527_33679528_UQCC2_NM_-|	165.391	-1.82616	0.730586	-2.49959	0.0124339	0.157878	0	8.09466	3.93669	22.0147	14.3128	8.20145	274.296	312.994	356.664	331.178	382.357	270.648	1.91186	-1.88795	-0.0602104	-1.82774	UQCC2	chr6:33677162:-;chr6:33677246:-	chr6_33709366_-;chr6_33709470_-
chr6:86268671-86268741:mpeak_68865|chr6_86215723_86303874_SNX14_NM_-|	199.63	-1.51131	0.73898	-2.04513	0.0408422	0.304042	13.7774	12.142	1.57468	11.486	10.2234	22.0808	384.515	531.549	529.092	246.948	331.24	300.93	1.9025	-0.671488	0.717097	-1.38858	SNX14	chr6:86268685:-	chr6_85558972_-
chr3:53152503-53152616:mpeak_54556|chr3_53126086_53164470_RFT1_NM_-|	139.081	-2.14855	1.03177	-2.0824	0.0373055	0.287907	10.0199	2.69822	0	16.2718	3.06703	12.6176	258.013	307.597	440.122	136.874	195.268	286.42	1.89685	-1.32922	0.701257	-2.03047	RFT1	chr3:53152546:-	chr3_53118536_-
chr10:3205112-3205174:mpeak_8483|chr10_3180316_3215033_PITRM1_NM_-|	221.378	-1.11085	0.559069	-1.98697	0.0469256	0.328674	6.26246	14.8402	11.8101	8.61446	9.2011	14.5103	521.036	509.964	736.162	261.305	255.586	307.239	1.86246	0.0259598	1.10049	-1.07453	PITRM1	chr10:3205118:-	chr10_3162930_-
chr16:70548139-70548196:mpeak_31589|chr16_70515047_70557457_COG4_NM_-|	165.263	-1.85101	0.679891	-2.72251	0.00647887	0.113095	15.0299	4.04733	4.72403	12.4431	15.3352	13.8794	335.668	321.088	621.998	236.419	191.178	211.345	1.86129	-0.807544	1.00098	-1.80852	COG4	chr16:70548141:-	chr16_70514240_-
chr1:94367159-94367232:mpeak_3329|chr1_94354715_94375154_GCLM_NM_-|	109.095	-1.86817	0.717894	-2.60229	0.00926024	0.138965	2.50498	0	4.72403	13.4003	11.2458	10.725	167.834	232.047	187.387	245.991	248.43	184.848	1.84644	-2.2907	-0.209964	-2.08073	GCLM	-	-
chr4:3202749-3202812:mpeak_58473|chr4_3076236_3241572_HTT_NM_+|	229.387	-1.62618	0.59444	-2.73566	0.00622554	0.110973	8.76744	14.8402	14.1721	4.78581	18.4022	11.9867	532.309	693.443	838.516	190.475	208.558	216.392	1.83018	0.103073	1.74597	-1.6429	HTT	chr4:3202806:+	chr4_3201078_+
chr4:107238092-107238274:mpeak_60506|chr4_107236766_107268682_AIMP1_NM_+|	66.8596	-2.53292	1.03625	-2.44431	0.0145131	0.172645	1.25249	2.69822	0	6.70014	4.08938	13.8794	96.4418	136.26	95.268	151.232	159.486	135.008	1.80689	-2.64251	-0.442593	-2.19992	AIMP1	-	chr4_106317061_+
chr6:151420648-151420700:mpeak_70292|chr6_151186814_151422661_MTHFD1L_NM_+|	65.3135	-2.22406	0.785761	-2.83045	0.00464826	0.0937725	2.50498	4.04733	3.93669	5.74298	5.11172	4.41616	131.512	241.491	208.645	44.9866	61.3407	70.0277	1.80333	-0.541903	1.72166	-2.26356	MTHFD1L	-	-
chr8:131172127-131172213:mpeak_77774|chr8_131067051_131455906_ASAP1_NM_-|	41.4288	-3.03438	1.45231	-2.08935	0.0366758	0.284702	1.25249	0	0	4.78581	4.08938	3.78528	100.199	82.2957	28.3442	85.1875	116.547	70.6586	1.78215	-3.33746	-0.369548	-2.96791	ASAP1	-	-
chrX:153149943-153149997:mpeak_83919|chrX_153128349_153151628_L1CAM_NM_-|	137.167	-1.85586	0.872597	-2.12682	0.0334347	0.268514	12.5249	0	2.36202	2.87149	7.15641	5.04704	382.01	557.183	315.723	138.789	101.212	121.129	1.77943	-0.0181066	1.797	-1.81511	L1CAM	-	-
chr17:74413487-74413544:mpeak_36571|chr17_74387694_74449288_UBE2O_NM_-|	109.548	-2.31905	0.963861	-2.406	0.0161282	0.182908	3.75747	8.09466	5.51137	0	5.11172	17.6647	303.103	350.769	342.492	86.1446	90.9887	100.941	1.74269	-0.39148	1.8412	-2.23268	UBE2O	chr17:74413491:-	chr17_76417412_-
chr3:180679284-180679350:mpeak_57478|chr3_180630233_180693909_FXR1_NM_+|	93.0154	-2.91432	1.19064	-2.44769	0.0143777	0.172149	0	2.69822	0	6.70014	11.2458	3.1544	132.764	205.065	153.531	222.062	184.022	194.942	1.6474	-2.96719	-0.290647	-2.67654	FXR1	-	chr3_180961550_+
chr14:53529654-53529798:mpeak_24113|chr14_53513667_53620046_DDHD1_NM_-|	79.1692	-3.44411	1.17137	-2.94025	0.00327945	0.0769988	2.50498	0	0	12.4431	5.11172	6.3088	192.884	148.402	120.463	162.718	142.106	157.089	1.6275	-3.25194	-0.000512857	-3.25143	DDHD1	-	chr14_53063029_-
chr14:39584030-39584090:mpeak_23754|chr14_39583487_39605643_GEMIN2_NM_+|	43.921	-4.07066	1.50802	-2.69934	0.00694778	0.118517	1.25249	0	0	12.4431	4.08938	6.93969	40.0797	148.402	42.5163	58.3869	106.324	106.619	1.62662	-4.22808	-0.232165	-3.99591	GEMIN2	-	chr14_39114886_+
chr20:24949481-24949581:mpeak_48832|chr20_24944658_24973425_APMAP_NM_-|	320.572	-1.29366	0.64477	-2.00639	0.0448145	0.320552	13.7774	14.8402	9.44807	10.5288	13.2905	29.6514	551.096	802.721	992.834	424.98	570.468	413.227	1.62213	-0.490256	0.736264	-1.22652	APMAP	chr20:24949494:-;chr20:24949524:-	chr20_24968890_-
chr1:53717350-53717402:mpeak_2492|chr1_53712728_53793821_LRP8_NM_-|	111.716	-1.41935	0.723009	-1.96312	0.0496328	0.335769	2.50498	0	5.51137	5.74298	7.15641	6.3088	249.246	210.461	282.655	206.747	198.335	165.922	1.61977	-1.2607	0.378622	-1.63933	LRP8	chr1:53717348:-	chr1_53251678_-
chr17:79253477-79253549:mpeak_36836|chr17_79220473_79269139_SLC38A10_NM_-|	121.471	-2.14843	0.711	-3.0217	0.00251357	0.0674758	5.00996	8.09466	5.51137	6.70014	1.02234	10.0941	335.668	344.023	471.616	86.1446	104.279	79.4909	1.61695	0.0633233	2.0927	-2.02937	SLC38A10	chr17:79253499:-	chr17_81279699_-
chr9:20699526-20699576:mpeak_78547|chr9_20658307_20995554_FOCAD_NM_+|	108.846	-2.05771	0.988457	-2.08174	0.0373659	0.287907	0	0	4.72403	1.91433	2.04469	6.93969	216.681	395.289	265.333	128.26	124.726	160.244	1.61542	-1.20607	1.08613	-2.2922	FOCAD	-	-
chr4:143575759-143575810:mpeak_61133|chr4_142950067_143767604_INPP4B_NM_-|	52.6696	-2.75213	0.960243	-2.86608	0.00415589	0.0880578	1.25249	0	2.36202	10.5288	2.04469	9.46321	107.714	130.864	97.63	93.8019	98.1451	78.2292	1.61262	-2.60804	0.315453	-2.92349	INPP4B	-	-
chr3:196304620-196304687:mpeak_58012|chr3_196295724_196311003_FBXO45_NM_+|	159.645	-1.45186	0.677706	-2.14231	0.0321684	0.262808	3.75747	0	4.72403	16.2718	8.17876	10.725	232.963	300.852	259.822	335.007	389.513	353.924	1.60303	-2.05218	-0.442401	-1.60978	FBXO45	-	-
chr17:46930544-46930606:mpeak_35042|chr17_46908349_46940199_CALCOCO2_NM_+|	77.6212	-2.4312	1.07341	-2.26493	0.0235169	0.22476	0	0	2.36202	4.78581	3.06703	8.83233	102.704	187.526	155.893	130.174	167.665	168.445	1.58836	-2.82048	-0.0637643	-2.75671	CALCOCO2	chr17:46930597:+	chr17_48853232_+
chr5:463674-463825:mpeak_61942|chr5_443333_466841_EXOC3_NM_+|	112.726	-2.00806	0.950396	-2.11287	0.034612	0.275343	0	0	3.93669	1.91433	8.17876	5.67792	245.488	205.065	301.551	222.062	218.782	140.055	1.57027	-2.00222	0.372645	-2.37486	EXOC3	chr5:463733:+;chr5:463817:+	chr5_463616_+;chr5_463686_+
chr9:35731471-35731627:mpeak_78842|chr9_35697913_35732392_TLN1_NM_-|	41.7028	-3.75634	0.932122	-4.02988	5.58048e-05	0.0106798	2.50498	1.34911	2.36202	3.82865	10.2234	3.78528	98.9468	159.195	139.359	26.8006	17.3799	34.6984	1.5638	-1.52082	2.33325	-3.85407	TLN1	-	-
chr11:112103958-112104106:mpeak_15568|chr11_112097087_112104154_PTS_NM_+|	38.7876	-3.71209	1.65153	-2.24767	0.0245972	0.228025	0	1.34911	0	2.87149	1.02234	6.93969	28.8073	175.384	57.4757	34.4579	94.0557	63.088	1.54675	-3.00542	0.449624	-3.45505	PTS	chr11:112104019:+;chr11:112104123:+	chr11_112233295_+;chr11_112233398_+
chr2:225370662-225370752:mpeak_47695|chr2_225339093_225450114_CUL3_NM_-|	49.4553	-4.05551	1.38475	-2.92869	0.00340392	0.0782785	0	1.34911	0	9.57163	7.15641	6.3088	71.392	141.657	51.177	81.3588	112.458	111.035	1.53177	-4.09386	-0.206337	-3.88753	CUL3	-	chr2_224505968_-
chr15:23000157-23000284:mpeak_26207|chr15_22892648_23002875_CYFIP1_NM_+|	188.72	-1.74532	0.870541	-2.00487	0.0449769	0.320693	18.7874	2.69822	7.08605	9.57163	1.02234	5.67792	428.352	886.365	577.907	125.388	92.011	109.773	1.50963	0.812201	2.53226	-1.72006	CYFIP1	chr15:23000258:+;chr15:23000291:+	chr15_22872814_-
chr2:54040081-54040157:mpeak_43338|chr2_54014067_54045034_ERLEC1_NM_+|	45.4753	-3.62451	1.59029	-2.27916	0.0226577	0.22053	1.25249	0	0	14.3574	1.02234	1.26176	71.392	109.278	69.2858	67.9585	124.726	85.1689	1.50326	-3.73192	-0.152651	-3.57927	ERLEC1	-	-
chr2:15735632-15735683:mpeak_42235|chr2_15731744_15770899_DDX1_NM_+|	85.9709	-2.57886	1.06956	-2.41115	0.0159024	0.182053	1.25249	0	5.51137	13.4003	7.15641	1.26176	221.691	256.331	212.581	61.2584	128.815	122.391	1.46912	-1.68963	1.14416	-2.83379	DDX1	-	-
chr4:95471018-95471128:mpeak_60175|chr4_95373007_95585128_PDLIM5_NM_+|	584.051	-1.3051	0.636033	-2.05193	0.0401761	0.30049	7.51495	24.284	35.4302	16.2718	37.8268	27.7587	1560.6	1363.95	1706.95	741.801	846.501	639.713	1.45156	-0.284023	1.05572	-1.33974	PDLIM5	chr4:95471123:+	chr4_94549971_+
chr3:19995918-19996082:mpeak_53462|chr3_19988571_20025199_RAB5A_NM_+|	266.19	-1.55347	0.59297	-2.6198	0.00879805	0.133818	3.75747	10.7929	3.14936	24.8862	23.5139	25.8661	419.585	484.331	318.085	533.14	737.11	610.061	1.44842	-2.06898	-0.621727	-1.44725	RAB5A	chr3:19995977:+;chr3:19996018:+	chr3_19954483_+;chr3_19954524_+
chr16:627162-627212:mpeak_29058|chr16_619967_632882_PIGQ_NM_+|	42.8439	-2.76079	1.10654	-2.49498	0.0125965	0.157878	0	1.34911	1.57468	3.82865	1.02234	7.57057	117.734	84.994	103.929	63.1727	79.7429	49.2087	1.43016	-2.08694	0.674585	-2.76152	PIGQ	chr16:627217:+	chr16_577238_+
chr5:179325823-179325885:mpeak_66398|chr5_179291128_179334856_TBC1D9B_NM_-|	209.003	-1.92658	0.738641	-2.60828	0.00909992	0.137478	5.00996	9.44377	0	6.70014	12.2681	10.725	420.837	504.567	593.653	330.221	349.642	264.97	1.42724	-1.03869	0.685046	-1.72374	TBC1D9B	chr5:179325829:-	chr5_179898828_-
chr2:225379324-225379431:mpeak_47700|chr2_225339093_225450114_CUL3_NM_-|	49.4817	-4.07297	1.51657	-2.68564	0.00723903	0.122247	1.25249	0	0	17.2289	3.06703	3.1544	71.392	141.657	51.177	81.3588	112.458	111.035	1.42207	-4.22674	-0.206337	-4.0204	CUL3	-	-
chr12:53416356-53416518:mpeak_17979|chr12_53400041_53433926_EIF4B_NM_+|	444.834	-1.30209	0.503566	-2.58575	0.00971681	0.141222	25.0498	5.39644	13.3848	24.8862	26.581	20.8191	914.319	1083.34	1142.43	657.571	674.747	749.486	1.39586	-0.721769	0.592968	-1.31474	EIF4B	-	-
chr1:205064120-205064199:mpeak_7115|chr1_205057943_205091150_RBBP5_NM_-|	108.363	-2.15975	0.820699	-2.6316	0.00849827	0.132264	0	5.39644	0.787339	6.70014	10.2234	5.67792	232.963	210.461	222.817	223.976	203.447	177.908	1.39224	-1.86986	0.138321	-2.00818	RBBP5	-	-
chr1:120270020-120270076:mpeak_4379|chr1_120254418_120286508_PHGDH_NM_+|	234	-2.03247	0.900542	-2.25694	0.0240121	0.225968	0	0	9.44807	6.70014	4.08938	5.04704	503.501	621.94	952.68	237.376	238.206	229.01	1.36393	-0.745168	1.56042	-2.30559	PHGDH	-	-
chr6:31322880-31322934:mpeak_67482|chr6_31322073_31324989_HLA-B_NM_-|	122.149	-1.86359	0.807533	-2.30775	0.0210129	0.212813	2.50498	4.04733	5.51137	9.57163	2.04469	15.1411	205.409	307.597	371.624	161.76	171.754	208.821	1.3637	-1.14927	0.705887	-1.85516	HLA-B	-	chr6_31355166_-
chr2:240957818-240957895:mpeak_48112|chr2_240900603_240964819_NDUFA10_NM_-|	154.807	-2.98819	0.980177	-3.04862	0.00229894	0.0640526	5.00996	0	0	11.486	8.17876	3.78528	298.093	317.041	493.661	256.52	265.81	198.096	1.35552	-2.22672	0.622072	-2.84879	NDUFA10	chr2:240957838:-	chr2_240018421_-
chr19:46353625-46353719:mpeak_40897|chr19_46318955_46366548_SYMPK_NM_-|	300.51	-2.12539	1.00798	-2.10858	0.0349812	0.276972	0	10.7929	0	9.57163	5.11172	5.04704	725.192	577.419	1127.47	374.251	305.681	465.59	1.33241	-0.870339	1.085	-1.95534	SYMPK	chr19:46353631:-;chr19:46353662:-;chr19:46353712:-	chr19_45850384_-
chr19:50707378-50707431:mpeak_41273|chr19_50706884_50812896_MYH14_NM_+|	78.2221	-3.53268	0.905889	-3.89968	9.63193e-05	0.0120007	1.25249	4.04733	0	6.70014	8.17876	10.725	195.389	169.988	233.052	120.602	107.346	81.3836	1.32843	-2.27235	0.952022	-3.22437	MYH14	chr19:50707429:+	chr19_50204171_+
chr1:151509195-151509320:mpeak_5140|chr1_151483861_151509680_CGN_NM_+|	93.0919	-2.42184	0.990296	-2.44557	0.0144622	0.172472	1.25249	1.34911	7.87339	12.4431	1.02234	9.46321	152.804	358.863	277.143	111.031	101.212	82.6453	1.32795	-1.1302	1.41951	-2.54971	CGN	-	chr1_151536775_+
chr2:153526737-153526900:mpeak_45858|chr2_153512912_153573975_PRPF40A_NM_-|	133.068	-2.80652	0.921395	-3.04594	0.00231951	0.0640526	3.75747	2.69822	0	17.2289	6.13407	19.5573	281.811	296.804	152.744	243.119	268.877	304.084	1.32405	-2.73302	-0.158132	-2.57488	PRPF40A	-	chr2_152670249_-
chr22:28293784-28293841:mpeak_51914|chr22_28249651_28315294_PITPNB_NM_-|	168.571	-1.98501	1.00867	-1.96796	0.0490727	0.335151	3.75747	0	0	9.57163	6.13407	2.52352	258.013	298.153	299.189	343.621	382.357	419.536	1.31786	-2.27842	-0.421399	-1.85702	PITPNB	-	chr22_27897819_-
chr15:89807825-89807883:mpeak_28634|chr15_89787193_89859627_FANCI_NM_+|	117.431	-3.42614	1.24236	-2.75777	0.00581967	0.107104	3.75747	0	0	5.74298	3.06703	12.6176	115.229	439.81	302.338	138.789	146.195	241.627	1.31476	-2.51164	0.703192	-3.21483	FANCI	chr15:89807878:+	chr15_89264650_+
chr15:52659228-52659332:mpeak_27283|chr15_52606045_52821247_MYO5A_NM_-|	52.4005	-2.88746	1.25172	-2.30679	0.0210665	0.212813	0	1.34911	0.787339	3.82865	5.11172	13.2485	116.482	66.1064	62.1998	138.789	107.346	113.558	1.30916	-3.37655	-0.555235	-2.82131	MYO5A	-	-
chr6:119569418-119569487:mpeak_69601|chr6_119501110_119670931_MAN1A1_NM_-|	109.349	-1.90175	0.754717	-2.51981	0.0117417	0.153378	2.50498	4.04733	3.93669	9.57163	9.2011	5.04704	190.379	372.354	244.862	130.174	174.821	165.291	1.29879	-1.18328	0.780095	-1.96338	MAN1A1	-	chr6_119248266_-
chr1:10132587-10132647:mpeak_426|chr1_10093040_10239952_UBE4B_NM_+|	67.7331	-2.40854	0.916006	-2.62939	0.00855379	0.132495	0	1.34911	3.14936	2.87149	2.04469	8.20145	154.056	171.337	199.197	80.4017	93.0334	97.1556	1.28628	-1.544	0.955079	-2.49908	UBE4B	chr1:10132640:+	chr1_10072595_+
chr1:220968215-220968268:mpeak_7582|chr1_220960038_220986633_MARC1_NM_+|	89.3156	-2.70862	1.24136	-2.18198	0.0291108	0.251097	0	4.04733	0.787339	2.87149	1.02234	19.5573	165.329	232.047	167.703	149.317	162.553	166.552	1.28336	-2.27817	0.240167	-2.51833	MARC1	-	chr1_220794912_+
chr1:19535918-19536071:mpeak_790|chr1_19401390_19536746_UBR4_NM_-|	170.46	-3.19642	1.25953	-2.53779	0.0111556	0.149436	0	0	7.08605	6.70014	9.2011	0	561.116	627.336	494.449	83.2731	117.57	138.794	1.26318	-1.16609	2.30889	-3.47497	UBR4	chr1:19535917:-;chr1:19536012:-	chr1_19209431_-;chr1_19209527_-
chr7:27839576-27839716:mpeak_71594|chr7_27778991_27868246_TAX1BP1_NM_+|	357.986	-2.23533	0.947056	-2.36029	0.0182608	0.196551	6.26246	0	0	28.7149	10.2234	10.0941	506.006	563.928	419.652	713.086	1007.01	1030.86	1.26125	-2.96894	-0.885021	-2.08391	TAX1BP1	-	chr7_27800005_+;chr7_27800053_+
chr15:49429540-49429599:mpeak_27007|chr15_49420291_49447854_COPS2_NM_-|	78.2746	-2.8201	1.38496	-2.03623	0.041727	0.308055	0	1.34911	0	7.6573	2.04469	5.67792	92.6843	157.846	71.6478	182.818	253.541	164.029	1.25624	-3.51097	-0.898038	-2.61293	COPS2	-	chr15_49137378_-
chrX:153676853-153676915:mpeak_83975|chrX_153672472_153678771_FAM50A_NM_+|	111.483	-3.20709	1.18645	-2.70309	0.00686978	0.117783	0	2.69822	0	6.70014	3.06703	10.0941	229.206	169.988	246.437	249.819	249.452	170.338	1.25376	-2.87988	-0.05261	-2.82727	FAM50A	-	chrX_154448502_+;chrX_154448515_+
chr16:87741845-87742004:mpeak_32203|chr16_87741681_87799598_KLHDC4_NM_-|	88.3303	-2.36463	1.06335	-2.22374	0.0261657	0.234313	1.25249	4.04733	0	8.61446	0	5.67792	215.428	155.148	266.121	115.817	163.575	124.283	1.24859	-1.43123	0.657411	-2.08864	KLHDC4	chr16:87741956:-	chr16_87708241_-
chr3:160254582-160254646:mpeak_57072|chr3_160219990_160283376_KPNA4_NM_-|	209.66	-1.51361	0.644214	-2.34954	0.0187964	0.199282	5.00996	5.39644	1.57468	14.3574	18.4022	13.8794	395.787	335.928	259.034	530.268	463.122	473.16	1.20929	-1.96078	-0.565834	-1.39495	KPNA4	chr3:160254584:-	chr3_160536796_-
chr4:2959327-2959447:mpeak_58453|chr4_2940657_2965233_NOP14_NM_-|	208.273	-1.53041	0.602531	-2.53997	0.0110862	0.1491	7.51495	5.39644	6.29871	8.61446	6.13407	13.2485	480.957	454.65	673.175	285.234	297.502	260.554	1.19408	-0.543408	0.931867	-1.47528	NOP14	-	-
chr11:47244647-47244704:mpeak_13446|chr11_47236492_47260350_DDB2_NM_+|	142.249	-3.06606	1.03441	-2.96407	0.00303604	0.0745451	0	4.04733	0	2.87149	8.17876	6.3088	260.518	321.088	450.358	195.261	246.385	211.976	1.17659	-2.10065	0.658864	-2.75951	DDB2	chr11:47244704:+	chr11_47223170_+
chr21:35893365-35893421:mpeak_50824|chr21_35890554_35987441_RCAN1_NM_-|	62.9536	-3.93632	1.59134	-2.47359	0.0133763	0.165376	0	1.34911	0	5.74298	15.3352	0	131.512	114.674	99.992	116.774	153.352	116.713	1.16915	-3.96567	-0.160217	-3.80545	RCAN1	chr21:35893369:-	chr21_34521072_-
chr17:58307947-58308239:mpeak_35684|chr17_58256789_58469586_USP32_NM_-|	319.036	-1.31971	0.620354	-2.12735	0.0333911	0.268484	8.76744	2.69822	7.08605	26.8006	14.3128	22.7117	438.372	661.064	492.874	587.698	923.177	642.867	1.16508	-1.78257	-0.435724	-1.34685	USP32	-	-
chrX:10069323-10069384:mpeak_81709|chrX_9983794_10109474_WWC3_NM_+|	157.103	-2.32058	1.08099	-2.1467	0.0318168	0.261123	0	4.04733	0	4.78581	2.04469	5.67792	215.428	433.064	397.606	238.333	263.765	320.487	1.16069	-1.62786	0.346782	-1.97464	WWC3	chrX:10069377:+	-
chr21:46956108-46956270:mpeak_51339|chr21_46936054_46962385_SLC19A1_NM_-|	83.951	-4.57209	1.21691	-3.75715	0.000171863	0.0175172	2.50498	0	0	10.5288	6.13407	9.46321	240.478	126.816	280.293	132.088	119.614	79.4909	1.16045	-3.38262	0.967399	-4.35002	SLC19A1	chr21:46956117:-;chr21:46956171:-	chr21_45536208_-
chr6:128641194-128641244:mpeak_69726|chr6_128291425_128841819_PTPRK_NM_-|	195.607	-2.41756	1.07619	-2.24641	0.0246775	0.22814	0	5.39644	0	2.87149	5.11172	6.3088	290.578	728.52	432.249	209.619	272.966	393.669	1.11547	-1.40513	0.727971	-2.1331	PTPRK	chr6:128641193:-	chr6_128320043_-
chr20:2988023-2988071:mpeak_48352|chr20_2844840_3018704_PTPRA_NM_+|	60.4542	-3.96223	1.31656	-3.00952	0.0026166	0.0688116	1.25249	0	0	6.70014	6.13407	6.93969	85.1694	152.449	101.567	112.945	134.949	117.344	1.10779	-3.98072	-0.106764	-3.87396	PTPRA	-	-
chr7:756256-756313:mpeak_70820|chr7_590239_767313_PRKAR1B_NM_-|	121.644	-2.72732	1.18762	-2.29647	0.0216492	0.216107	0	2.69822	0	4.78581	3.06703	5.67792	214.176	209.112	308.637	292.892	221.849	196.835	1.10594	-2.32616	0.0406793	-2.36684	PRKAR1B	chr7:756255:-	chr7_716604_-
chr14:68158094-68158168:mpeak_24716|chr14_68145140_68162510_RDH11_NM_-|	324.307	-1.57851	0.801432	-1.96961	0.0488828	0.335069	0	0	7.87339	6.70014	7.15641	9.46321	572.388	845.892	721.99	457.524	572.513	690.183	1.10361	-1.5665	0.3152	-1.8817	RDH11	-	-
chr2:112636535-112636650:mpeak_45004|chr2_112526983_112641741_ANAPC1_NM_-|	44.5493	-3.64386	1.19957	-3.03765	0.00238434	0.0646224	1.25249	1.34911	0	1.91433	6.13407	4.41616	97.6943	137.609	120.463	46.901	61.3407	55.5175	1.0969	-2.26036	1.11935	-3.37971	ANAPC1	-	-
chr5:137535732-137535782:mpeak_65017|chr5_137524837_137549032_CDC23_NM_-|	85.9318	-3.7682	1.36304	-2.76456	0.00569991	0.10579	0	2.69822	0	2.87149	0	7.57057	135.269	300.852	303.913	69.8729	105.301	102.834	1.09382	-1.95233	1.41246	-3.36479	CDC23	-	-
chr11:11971441-11971564:mpeak_12705|chr11_11862969_11977547_USP47_NM_+|	84.8453	-4.43119	1.46719	-3.02018	0.00252622	0.0675463	0	1.34911	0	24.8862	6.13407	10.0941	170.339	159.195	45.6657	224.933	193.223	182.324	1.07871	-4.92956	-0.67846	-4.2511	USP47	-	-
chr10:93578017-93578096:mpeak_10794|chr10_93558150_93622693_TNKS2_NM_+|	64.4329	-3.91894	1.33254	-2.94096	0.00327195	0.0769988	0	0	1.57468	0.957163	7.15641	13.2485	146.541	143.006	148.807	83.2731	79.7429	148.888	1.07767	-3.76192	0.490996	-4.25292	TNKS2	chr10:93578084:+	chr10_91818339_+
chr14:24453964-24454113:mpeak_23338|chr14_24439082_24475094_DHRS4L2_NM_+|	121.518	-3.135	1.19314	-2.62752	0.00860087	0.132615	2.50498	0	0	2.87149	6.13407	10.0941	231.711	178.083	290.528	281.406	250.474	204.405	1.07307	-2.93067	-0.0722481	-2.85843	DHRS4L2	-	chr14_23984904_+
chr9:35068008-35068073:mpeak_78802|chr9_35057219_35072739_VCP_NM_-|	1301.77	-1.20327	0.598244	-2.01134	0.0442898	0.31815	53.8571	21.5858	59.0504	35.415	18.4022	13.8794	3445.6	4512.77	4745.29	919.833	955.892	839.702	1.0587	0.990379	2.22599	-1.23561	VCP	-	chr9_35068025_-
chr4:54143501-54143565:mpeak_59395|chr4_53740228_54232242_SCFD2_NM_-|	83.5734	-4.70588	0.945156	-4.97895	6.39312e-07	0.000850931	1.25249	4.04733	0	5.74298	8.17876	14.5103	186.621	294.106	291.315	63.1727	74.6312	59.3028	1.0297	-2.4235	1.9697	-4.3932	SCFD2	chr4:54143511:-	chr4_53277346_-
chr16:70713685-70713743:mpeak_31615|chr16_70698352_70719954_MTSS1L_NM_-|	46.9163	-3.48025	1.35711	-2.56445	0.0103339	0.143352	0	0	0.787339	10.5288	4.08938	3.78528	92.6843	59.3609	77.9465	120.602	112.458	80.7527	1.027	-4.54685	-0.448324	-4.09852	MTSS1L	-	-
chr17:80017823-80017979:mpeak_36941|chr17_80016130_80023697_DUS1L_NM_-|	184.523	-1.71774	0.713716	-2.40675	0.016095	0.182908	3.75747	4.04733	3.93669	14.3574	4.08938	15.1411	409.565	311.644	423.588	410.623	343.508	270.017	1.02564	-1.51633	0.160669	-1.677	DUS1L	chr17:80017887:-	-
chrY:2585843-2585923:mpeak_84115|chrY_2559227_2608819_CD99_NM_+|	121.105	-2.75935	1.26442	-2.1823	0.0290876	0.251097	2.50498	0	0	9.57163	2.04469	2.52352	179.106	257.68	307.062	215.362	175.843	301.561	1.01028	-2.49689	0.102641	-2.59953	CD99	-	-
chr1:26496900-26496963:mpeak_1165|chr1_26496387_26497065_ZNF593_NM_+|	71.1234	-3.10424	1.33601	-2.32351	0.0201517	0.207618	1.25249	0	0	5.74298	4.08938	3.1544	92.6843	159.195	122.038	157.932	171.754	135.639	1.0049	-3.37417	-0.315521	-3.05865	ZNF593	-	-
chr14:103804632-103804778:mpeak_26021|chr14_103800338_103807299_EIF5_NM_+|	122.377	-2.19515	0.920653	-2.38434	0.0171099	0.188824	1.25249	4.04733	0.787339	10.5288	12.2681	11.3558	132.764	310.295	162.979	205.79	365.999	250.46	1.00442	-2.48816	-0.440166	-2.048	EIF5	chr14:103804664:+;chr14:103804810:+	chr14_103338334_+;chr14_103338373_+
chr7:51104840-51104891:mpeak_72128|chr7_51085265_51384515_COBL_NM_-|	43.1416	-3.35543	1.46916	-2.28392	0.0223764	0.220325	0	0	0.787339	0	3.06703	9.46321	92.6843	86.3431	59.0504	86.1446	98.1451	82.0145	0.992119	-3.99229	-0.161642	-3.83064	COBL	-	chr7_51037121_-
chr4:41012844-41012897:mpeak_59199|chr4_40818276_41216635_APBB2_NM_-|	72.8381	-3.52566	1.33365	-2.64362	0.00820247	0.129561	1.25249	0	0	5.74298	8.17876	3.78528	164.076	84.994	129.911	148.36	165.62	162.136	0.991467	-3.82145	-0.329188	-3.49226	APBB2	chr4:41012839:-	chr4_41010827_-
chr11:34133577-34133637:mpeak_13199|chr11_34127110_34167630_NAT10_NM_+|	307.255	-2.16506	1.0526	-2.05687	0.0396986	0.299193	17.5349	0	1.57468	3.82865	12.2681	5.04704	819.129	879.62	1217.23	212.49	200.38	317.964	0.98301	-0.145943	1.99636	-2.14231	NAT10	-	-
chr11:126280381-126280533:mpeak_16054|chr11_126225539_126283855_ST3GAL4_NM_+|	62.2488	-2.70463	1.20461	-2.24524	0.0247528	0.228472	0	1.34911	0.787339	6.70014	6.13407	4.41616	83.9169	102.532	140.934	143.574	159.486	97.1556	0.978876	-3.01334	-0.289799	-2.72354	ST3GAL4	chr11:126280535:+	chr11_126410638_+
chrX:69573605-69573664:mpeak_82726|chrX_69509878_69639911_KIF4A_NM_+|	116.488	-2.70731	1.24413	-2.17606	0.0295504	0.251809	3.75747	2.69822	0	12.4431	0	2.52352	181.611	509.964	299.976	109.117	145.173	130.592	0.976605	-1.21311	1.36527	-2.57838	KIF4A	-	-
chr6:107365458-107365538:mpeak_69241|chr6_107349375_107372260_C6orf203_NM_+|	46.6087	-4.28577	1.52638	-2.8078	0.00498807	0.0978602	0	0	0.787339	3.82865	2.04469	19.5573	95.1893	89.0413	63.7744	68.9157	81.7876	134.378	0.952407	-5.01344	-0.201001	-4.81244	C6orf203	-	chr6_107044306_+
chr5:153712939-153712998:mpeak_65676|chr5_153570294_153796373_GALNT10_NM_+|	86.6401	-3.34535	0.883651	-3.78583	0.000153198	0.0161289	2.50498	1.34911	1.57468	5.74298	24.5363	10.725	206.661	186.177	177.939	135.917	150.285	136.27	0.95112	-2.91707	0.434071	-3.35115	GALNT10	chr5:153712990:+	-
chr2:74404813-74404866:mpeak_44050|chr2_74383772_74405995_MOB1A_NM_-|	69.2291	-3.94161	1.43779	-2.74143	0.00611724	0.110504	0	1.34911	0	2.87149	13.2905	1.26176	122.744	159.195	144.87	134.96	119.614	130.592	0.948276	-3.69097	0.14811	-3.83908	MOB1A	chr2:74404815:-	-
chr9:35726435-35726489:mpeak_78838|chr9_35697913_35732392_TLN1_NM_-|	41.233	-6.13045	1.54092	-3.97844	6.93692e-05	0.0113225	1.25249	0	0	12.4431	4.08938	0.63088	98.9468	159.195	139.359	26.8006	17.3799	34.6984	0.945274	-3.77646	2.33325	-6.10971	TLN1	-	chr9_35726430_-
chr11:66251213-66251299:mpeak_14309|chr11_66247483_66276549_DPP3_NM_+|	202.598	-2.26264	0.870393	-2.59957	0.00933412	0.139453	7.51495	4.04733	0	5.74298	2.04469	6.93969	415.827	651.62	770.017	155.06	200.38	211.976	0.943878	-0.349072	1.69524	-2.04431	DPP3	chr11:66251300:+	chr11_66483828_+
chr11:31525819-31525880:mpeak_13089|chr11_31454115_31531175_IMMP1L_NM_-|	92.6202	-2.02124	1.03053	-1.96136	0.0498369	0.336156	1.25249	2.69822	0.787339	1.91433	10.2234	8.20145	140.279	218.556	144.87	116.774	262.743	203.144	0.94064	-2.1019	-0.210074	-1.89182	IMMP1L	chr11:31525828:-	chr11_31504279_-
chr2:192206177-192206229:mpeak_46780|chr2_192110106_192288562_MYO1B_NM_+|	189.105	-2.72762	1.02922	-2.65018	0.00804492	0.128757	3.75747	0	0	11.486	3.06703	4.41616	363.222	499.171	344.854	327.35	373.156	338.783	0.933729	-2.33582	0.216126	-2.55195	MYO1B	-	chr2_191341502_+
chr1:202882220-202882316:mpeak_6976|chr1_202861787_202897772_KLHL12_NM_-|	78.8888	-2.99486	1.24168	-2.41194	0.0158679	0.182053	2.50498	0	0.787339	2.87149	5.11172	10.0941	55.1096	233.396	248.012	106.245	121.659	160.875	0.92047	-2.457	0.464676	-2.92168	KLHL12	-	-
chr2:207012250-207012376:mpeak_47233|chr2_206989000_207024243_NDUFS1_NM_-|	207.095	-1.63381	0.709789	-2.30182	0.0213452	0.2143	5.00996	9.44377	1.57468	10.5288	4.08938	3.78528	603.701	613.845	537.752	260.348	200.38	234.688	0.913145	-0.199345	1.33577	-1.53511	NDUFS1	-	-
chr6:17771839-17771895:mpeak_66923|chr6_17761108_17987854_KIF13A_NM_-|	48.4069	-3.0414	1.54508	-1.96844	0.0490177	0.335151	0	0	0.787339	0.957163	0	9.46321	75.1495	101.183	84.2453	93.8019	82.8099	132.485	0.906453	-3.72628	-0.246343	-3.47993	KIF13A	chr6:17771838:-	-
chr5:179311554-179311629:mpeak_66393|chr5_179291128_179334856_TBC1D9B_NM_-|	207.74	-1.92335	0.891859	-2.15656	0.03104	0.257097	3.75747	5.39644	0	6.70014	11.2458	1.89264	420.837	504.567	593.653	330.221	349.642	264.97	0.903907	-1.11585	0.685046	-1.80089	TBC1D9B	chr5:179311567:-	chr5_179884568_-
chr7:27825030-27825116:mpeak_71591|chr7_27778991_27868246_TAX1BP1_NM_+|	358.449	-1.85358	0.833454	-2.22398	0.02615	0.234313	6.26246	2.69822	0	22.0147	7.15641	22.7117	506.006	563.928	419.652	713.086	1007.01	1030.86	0.902332	-2.53358	-0.885021	-1.64856	TAX1BP1	-	chr7_27785413_+;chr7_27785461_+;chr7_27785486_+
chr15:52441477-52441529:mpeak_27245|chr15_52414965_52483565_GNB5_NM_-|	219.449	-2.4581	0.786414	-3.12571	0.00177377	0.0562343	3.75747	4.04733	0	10.5288	17.3799	8.20145	438.372	345.372	532.241	428.809	423.251	421.428	0.889615	-2.20997	0.0473582	-2.25733	GNB5	chr15:52441475:-	-
chr10:75143047-75143110:mpeak_10271|chr10_75135975_75173841_ANXA7_NM_-|	126.791	-2.49094	1.10828	-2.24758	0.0246029	0.228025	3.75747	0	1.57468	9.57163	9.2011	0.63088	167.834	379.1	379.497	160.803	225.938	183.586	0.863337	-1.86354	0.699893	-2.56343	ANXA7	-	-
chr10:735422-735472:mpeak_8407|chr10_323517_735608_DIP2C_NM_-|	164.293	-2.66253	0.876843	-3.0365	0.00239342	0.0646224	0	2.69822	4.72403	15.3146	8.17876	3.1544	321.89	445.206	527.517	204.833	252.519	185.479	0.859977	-1.84409	1.01001	-2.8541	DIP2C	-	-
chr10:76431778-76431833:mpeak_10368|chr10_75910942_76468078_ADK_NM_+|	100.635	-2.04093	0.939225	-2.17299	0.0297811	0.252727	0	1.34911	2.36202	3.82865	8.17876	3.1544	172.844	267.124	207.857	179.947	188.111	172.861	0.859289	-2.03051	0.260191	-2.2907	ADK	chr10:76431835:+	chr10_74672075_+
chr9:131035902-131035972:mpeak_80934|chr9_131019560_131038268_GOLGA2_NM_-|	608.868	-2.19998	0.536687	-4.09918	4.14616e-05	0.00873026	16.2824	10.7929	11.8101	34.4579	43.9608	19.5573	1276.29	1403.07	1968.35	852.832	844.457	824.561	0.836656	-1.3332	0.882038	-2.21524	GOLGA2	chr9:131035919:-	chr9_128273641_-
chr6:32948113-32948234:mpeak_67635|chr6_32936436_32948358_BRD2_NM_+|	44.6269	-4.51053	1.42553	-3.16411	0.00155558	0.0513799	0	0	0.787339	8.61446	3.06703	9.46321	55.1096	152.449	77.9465	55.5154	76.6758	95.8938	0.82731	-4.74717	0.323947	-5.07111	BRD2	-	chr6_32980388_+;chr6_32980404_+
chr12:56574480-56574629:mpeak_18331|chr12_56557549_56583351_SMARCC2_NM_-|	290.065	-1.94472	0.591245	-3.2892	0.00100474	0.0395904	7.51495	5.39644	5.51137	12.4431	12.2681	10.725	631.256	751.454	899.141	335.007	479.48	330.581	0.80736	-0.943735	0.994771	-1.93851	SMARCC2	chr12:56574481:-;chr12:56574578:-	chr12_56180696_-;chr12_56180790_-
chr3:185649362-185649480:mpeak_57714|chr3_185635513_185655924_TRA2B_NM_-|	294.553	-2.19539	0.799853	-2.74474	0.00605583	0.109689	3.75747	9.44377	2.36202	10.5288	11.2458	29.6514	455.907	843.194	641.681	368.508	573.535	584.826	0.801907	-1.72435	0.346062	-2.07041	TRA2B	-	chr3_185931671_-
chr4:3125497-3125547:mpeak_58464|chr4_3076236_3241572_HTT_NM_+|	224.804	-2.64257	0.967321	-2.73185	0.00629801	0.111674	0	0	5.51137	0	6.13407	6.3088	532.309	693.443	838.516	190.475	208.558	216.392	0.800968	-1.17484	1.74597	-2.92081	HTT	chr4:3125549:+	chr4_3123820_+
chr2:70488413-70488595:mpeak_43858|chr2_70485230_70503865_PCYOX1_NM_+|	530.357	-1.62061	0.532557	-3.04308	0.00234171	0.0641624	10.0199	6.74555	12.5974	17.2289	22.4916	24.6043	1239.97	983.501	1475.47	1037.56	841.39	692.707	0.793819	-1.13138	0.524412	-1.65579	PCYOX1	chr2:70488462:+;chr2:70488591:+	chr2_70261329_+;chr2_70261457_+
chr17:17057688-17057735:mpeak_33407|chr17_16946073_17088136_MPRIP_NM_+|	75.9413	-3.87709	1.38841	-2.79246	0.00523091	0.101049	1.25249	0	0	11.486	1.02234	3.1544	170.339	175.384	129.124	142.617	156.419	120.498	0.791302	-3.64446	0.178674	-3.82313	MPRIP	-	-
chr4:896648-896750:mpeak_58275|chr4_843562_926178_GAK_NM_-|	357.938	-3.03148	0.923413	-3.28291	0.00102743	0.0400164	6.26246	10.7929	0	4.78581	11.2458	20.8191	832.907	1099.52	1344.77	289.063	382.357	292.729	0.780635	-1.11147	1.76514	-2.87661	GAK	chr4:896648:-;chr4:896699:-	chr4_902863_-
chr12:117627097-117627174:mpeak_20396|chr12_117584082_117628300_FBXO21_NM_-|	248.678	-1.92309	0.69514	-2.76648	0.00566646	0.105471	0	2.69822	6.29871	7.6573	7.15641	11.3558	492.229	590.91	666.089	339.793	433.474	426.475	0.771506	-1.54038	0.543994	-2.08438	FBXO21	-	-
chr5:179671459-179671516:mpeak_66416|chr5_179663531_179719071_MAPK9_NM_-|	89.7496	-4.02604	1.49472	-2.6935	0.00707059	0.119703	0	1.34911	0	7.6573	1.02234	10.0941	83.9169	307.597	135.422	152.189	167.665	210.083	0.768087	-3.79864	-0.00819103	-3.79044	MAPK9	-	-
chr7:6627024-6627104:mpeak_71166|chr7_6617064_6628247_ZDHHC4_NM_+|	122.536	-2.41239	1.21846	-1.97987	0.0477186	0.330922	0	0	1.57468	1.91433	5.11172	6.93969	205.409	253.633	172.427	288.106	335.329	199.989	0.748103	-3.14876	-0.382925	-2.76584	ZDHHC4	chr7:6627100:+	chr7_6587469_+
chr3:15095077-15095195:mpeak_53321|chr3_15094140_15106816_MRPS25_NM_-|	730.666	-2.27935	0.528922	-4.30943	1.63677e-05	0.00593528	8.76744	9.44377	15.7468	44.0295	35.7821	68.1351	1399.03	1269.51	1909.3	1425.22	1262.6	1320.43	0.74179	-2.12325	0.191698	-2.31495	MRPS25	-	-
chr12:104360059-104360116:mpeak_19748|chr12_104359592_104380725_TDG_NM_+|	91.8633	-3.73138	1.46992	-2.53849	0.0111331	0.149432	1.25249	0	0	0	11.2458	5.67792	113.977	244.189	166.128	144.532	198.335	217.023	0.716673	-3.75617	-0.0947651	-3.66141	TDG	chr12:104360110:+	chr12_103966331_+
chr5:132388607-132388669:mpeak_64788|chr5_132387661_132439924_HSPA4_NM_+|	214.143	-2.14804	0.737337	-2.91324	0.00357701	0.0811511	2.50498	0	5.51137	7.6573	7.15641	6.3088	509.764	704.236	470.829	286.192	329.195	240.365	0.713695	-1.39776	0.977337	-2.3751	HSPA4	chr5:132388664:+	chr5_133052968_+
chr19:50435025-50435088:mpeak_41247|chr19_50431958_50435678_ATF5_NM_+|	432.218	-1.70829	0.749496	-2.27925	0.022652	0.22053	7.51495	2.69822	0	15.3146	11.2458	13.8794	919.329	561.23	669.238	1160.08	822.987	1003.1	0.712614	-1.98534	-0.474096	-1.51125	ATF5	chr19:50435084:+	chr19_49931841_+
chr6:18255956-18256073:mpeak_66958|chr6_18225961_18264799_DEK_NM_-|	141.958	-3.81141	1.52491	-2.49944	0.012439	0.157878	1.25249	0	0	19.1433	13.2905	3.78528	145.289	318.39	66.9238	243.119	397.692	494.61	0.708152	-4.85387	-1.09752	-3.75635	DEK	-	chr6_18255836_-
chr7:156956492-156956548:mpeak_74690|chr7_156931654_157060278_UBE3C_NM_+|	188.295	-2.0145	0.920784	-2.18781	0.0286833	0.248736	0	2.69822	3.14936	7.6573	9.2011	3.78528	221.691	588.212	438.548	301.506	367.022	316.071	0.70258	-1.81979	0.342531	-2.16232	UBE3C	-	-
chrX:2832642-2832693:mpeak_81634|chrX_2825673_2847416_ARSD_NM_-|	277.568	-1.87601	0.906347	-2.06986	0.0384653	0.293692	6.26246	2.69822	0	3.82865	4.08938	11.9867	539.824	491.076	891.268	500.596	407.916	471.268	0.699263	-1.15143	0.478296	-1.62973	ARSD	chrX:2832640:-	-
chr1:155288250-155288335:mpeak_5438|chr1_155278538_155290199_FDPS_NM_+|	501.235	-1.63513	0.505318	-3.23584	0.00121287	0.044449	7.51495	2.69822	13.3848	18.1861	22.4916	19.5573	1192.37	986.2	1209.35	826.989	824.01	892.065	0.696531	-1.35194	0.413834	-1.76578	FDPS	chr1:155288305:+	chr1_155318512_+
chr17:26993491-26993557:mpeak_33799|chr17_26989301_27028456_SUPT6H_NM_+|	192.367	-2.48268	0.66742	-3.71982	0.000199362	0.018657	6.26246	2.69822	1.57468	10.5288	6.13407	10.0941	447.139	534.248	533.816	278.534	243.318	234.057	0.69531	-1.34467	1.00323	-2.3479	SUPT6H	-	-
chr5:125903941-125904036:mpeak_64521|chr5_125880711_125931082_ALDH7A1_NM_-|	212.491	-2.44466	0.92898	-2.63155	0.00849958	0.132264	0	0	3.93669	7.6573	2.04469	3.78528	418.332	737.963	554.287	283.32	272.966	265.601	0.690413	-1.77654	1.05748	-2.83402	ALDH7A1	-	-
chr6:86222700-86222843:mpeak_68859|chr6_86215723_86303874_SNX14_NM_-|	195.67	-2.32741	0.867171	-2.68391	0.00727672	0.122271	1.25249	5.39644	0	8.61446	4.08938	4.41616	384.515	531.549	529.092	246.948	331.24	300.93	0.690126	-1.36449	0.717097	-2.08159	SNX14	-	chr6_85512983_-
chr8:67834578-67834636:mpeak_76177|chr8_67834349_67837777_SNHG6_NR_-|	414.072	-2.18954	1.06016	-2.0653	0.038895	0.295795	0	0	4.72403	18.1861	2.04469	16.4029	547.339	965.963	545.626	774.345	1043.81	1050.42	0.688324	-2.95508	-0.478441	-2.47664	SNHG6	chr8:67834628:-	chr8_66922328_-;chr8_66922376_-
chr16:2810790-2810858:mpeak_29290|chr16_2802329_2820858_SRRM2_NM_+|	259.545	-2.07641	0.815514	-2.54614	0.0108922	0.147009	0	5.39644	5.51137	2.87149	8.17876	3.78528	502.249	1026.67	849.539	204.833	252.519	252.983	0.687912	-0.443694	1.74346	-2.18715	SRRM2	chr16:2810847:+	chr16_2760842_+
chr1:28555496-28555546:mpeak_1323|chr1_28527881_28559542_DNAJC8_NM_-|	122.623	-3.06864	1.19523	-2.56741	0.0102461	0.143352	0	0	1.57468	10.5288	3.06703	5.04704	181.611	290.059	236.989	217.276	243.318	282.004	0.666616	-3.5655	-0.0674891	-3.49801	DNAJC8	-	-
chr5:43613271-43613338:mpeak_62699|chr5_43602790_43704356_NNT_NM_+|	144.906	-3.54672	1.05022	-3.37711	0.000732522	0.0338064	0	0	2.36202	8.61446	3.06703	9.46321	356.96	437.112	278.718	258.434	223.893	160.244	0.660525	-3.16221	0.739439	-3.90164	NNT	chr5:43613324:+	chr5_43613221_+
chr1:168148860-168148922:mpeak_6031|chr1_168148082_168169140_TIPRL_NM_+|	203.737	-1.92039	0.800179	-2.39995	0.0163975	0.184396	2.50498	0	2.36202	7.6573	9.2011	6.93969	341.93	414.177	358.239	375.208	477.435	449.187	0.655137	-2.28974	-0.224343	-2.0654	TIPRL	chr1:168148915:+	chr1_168179686_+
chr2:11767964-11768043:mpeak_42190|chr2_11674241_11780416_GREB1_NM_+|	144.947	-4.40924	1.18465	-3.72197	0.000197678	0.018657	0	2.69822	0	7.6573	3.06703	6.93969	295.588	547.739	392.882	176.118	145.173	161.505	0.654797	-2.71073	1.35644	-4.06717	GREB1	-	-
chr1:19488344-19488398:mpeak_786|chr1_19401390_19536746_UBR4_NM_-|	170.257	-3.10385	0.89056	-3.48527	0.000491635	0.0285572	2.50498	0	4.72403	5.74298	0	7.57057	561.116	627.336	494.449	83.2731	117.57	138.794	0.644335	-0.881023	2.30889	-3.18991	UBR4	-	-
chr12:101790224-101790367:mpeak_19665|chr12_101789448_101801598_ARL1_NM_-|	413.675	-2.10376	0.539854	-3.8969	9.74311e-05	0.0120007	2.50498	5.39644	6.29871	25.8434	19.4245	29.6514	715.172	771.691	736.162	783.916	967.138	900.897	0.638775	-2.39943	-0.25453	-2.1449	ARL1	-	chr12_101396504_-
chr5:137892496-137892562:mpeak_65058|chr5_137891803_137911318_HSPA9_NM_-|	750.964	-1.10074	0.515161	-2.13668	0.0326237	0.265282	16.2824	8.09466	15.7468	17.2289	10.2234	10.0941	1849.93	2227.38	2206.91	743.715	853.658	1052.31	0.638485	0.0957821	1.24591	-1.15013	HSPA9	-	chr5_138556791_-;chr5_138556813_-
chr10:6134318-6134439:mpeak_8571|chr10_6130948_6157415_RBM17_NM_+|	432.978	-1.62979	0.752107	-2.16697	0.0302373	0.253379	3.75747	5.39644	0	9.57163	6.13407	14.5103	825.392	804.07	610.975	915.047	1065.28	935.596	0.612866	-1.72285	-0.380175	-1.34267	RBM17	-	-
chr7:32570347-32570397:mpeak_71698|chr7_32535037_32623403_AVL9_NM_+|	73.0322	-3.94419	1.34385	-2.935	0.00333553	0.0773503	0	0	0.787339	3.82865	9.2011	8.83233	118.987	182.13	85.0326	148.36	169.709	149.519	0.611685	-4.7953	-0.27608	-4.51922	AVL9	-	-
chr17:41352647-41352782:mpeak_34691|chr17_41322487_41361919_NBR1_NM_+|	168.181	-3.63555	1.13834	-3.19374	0.00140442	0.0481853	2.50498	0	0	5.74298	7.15641	3.78528	363.222	437.112	448.783	254.605	250.474	244.782	0.601621	-2.73565	0.736213	-3.47186	NBR1	chr17:41352692:+;chr17:41352783:+;chr17:41352808:+	chr17_43200679_+;chr17_43200765_+;chr17_43200808_+
chr19:54683376-54683438:mpeak_41587|chr19_54678125_54693733_MBOAT7_NM_-|	252.086	-2.24541	0.863623	-2.59999	0.00932263	0.139453	5.00996	2.69822	0	9.57163	7.15641	1.89264	648.79	586.863	692.858	362.765	405.871	301.561	0.599544	-1.27244	0.849612	-2.12205	MBOAT7	chr19:54683381:-	chr19_54179666_-
chr4:106392803-106392860:mpeak_60446|chr4_106290910_106395227_PPA2_NM_-|	325.092	-1.43124	0.715218	-2.00112	0.0453797	0.321186	2.50498	6.74555	3.93669	3.82865	11.2458	10.725	529.804	801.372	873.946	431.68	629.764	595.551	0.598027	-0.968197	0.412288	-1.38048	PPA2	chr4:106392802:-	chr4_105471634_-
chr17:3746370-3746433:mpeak_32755|chr17_3716573_3749545_C17orf85_NM_-|	85.8076	-3.02696	1.14346	-2.64719	0.00811633	0.129022	1.25249	0	0.787339	6.70014	7.15641	3.78528	179.106	169.988	162.979	171.332	154.374	172.23	0.597521	-3.11248	0.0403884	-3.15287	C17orf85	-	-
chr16:3027374-3027525:mpeak_29322|chr16_3023065_3030540_PKMYT1_NM_-|	327.077	-1.9155	0.832238	-2.30162	0.0213564	0.2143	7.51495	1.34911	0	2.87149	9.2011	9.46321	713.92	603.052	916.462	571.426	519.351	570.316	0.59532	-1.2807	0.427131	-1.70783	PKMYT1	-	chr16_2977375_-
chr5:179239944-179240103:mpeak_66367|chr5_179233387_179263435_SQSTM1_NM_+|	1131.9	-1.64173	0.639136	-2.56867	0.0102088	0.143352	7.51495	22.9349	20.4708	21.0576	26.581	41.6381	1985.2	3140.73	3471.38	1351.51	2192.93	1300.88	0.592286	-0.810033	0.827293	-1.63733	SQSTM1	chr5:179239995:+;chr5:179240117:+	chr5_179812975_+;chr5_179813035_+;chr5_179813116_+
chr5:179313974-179314031:mpeak_66394|chr5_179291128_179334856_TBC1D9B_NM_-|	208.284	-2.29164	0.709819	-3.22849	0.00124446	0.0450815	2.50498	4.04733	2.36202	11.486	8.17876	6.93969	420.837	504.567	593.653	330.221	349.642	264.97	0.586833	-1.57747	0.685046	-2.26251	TBC1D9B	chr5:179313950:-;chr5:179313975:-	chr5_179886977_-
chr9:125760930-125761052:mpeak_80660|chr9_125703287_125865369_RABGAP1_NM_+|	290.232	-1.81901	0.835972	-2.17593	0.0295608	0.251809	1.25249	6.74555	0	1.91433	5.11172	8.20145	663.82	674.555	717.266	400.094	506.061	497.765	0.583617	-0.92896	0.550128	-1.47909	RABGAP1	-	-
chr14:105773819-105773878:mpeak_26151|chr14_105767147_105860890_PACS2_NM_+|	121.663	-4.35069	1.36383	-3.19006	0.00142245	0.0481853	0	1.34911	0	2.87149	13.2905	9.46321	255.508	143.006	295.252	223.019	290.346	225.855	0.583386	-4.24748	-0.0915547	-4.15593	PACS2	chr14:105773876:+	chr14_105307539_+
chr17:76178548-76178611:mpeak_36663|chr17_76171031_76183285_TK1_NM_-|	414.99	-1.31207	0.610902	-2.14775	0.0317336	0.260758	2.50498	8.09466	6.29871	10.5288	9.2011	9.46321	908.056	759.549	1251.08	621.199	691.105	702.801	0.578971	-0.788745	0.534465	-1.32321	TK1	chr17:76178552:-	chr17_78182472_-
chr17:60141736-60141795:mpeak_35860|chr17_60023961_60142643_MED13_NM_-|	133.895	-2.95635	1.21312	-2.43699	0.01481	0.174763	0	1.34911	0.787339	16.2718	12.2681	3.1544	195.389	188.875	170.065	290.977	325.106	402.502	0.578117	-3.89094	-0.877751	-3.01319	MED13	-	-
chr19:4911870-4911937:mpeak_38707|chr19_4903091_4960667_UHRF1_NM_+|	205.139	-3.70181	0.993068	-3.72765	0.000193275	0.0186041	6.26246	0	0.787339	18.1861	2.04469	6.93969	492.229	644.875	710.967	179.947	225.938	173.492	0.572202	-1.94639	1.67345	-3.61983	UHRF1	chr19:4911921:+	chr19_4911908_+
chr5:234097-234151:mpeak_61913|chr5_218337_256448_SDHA_NM_+|	210.932	-2.28783	1.00059	-2.28648	0.0222263	0.21927	2.50498	2.69822	4.72403	3.82865	0	15.1411	509.764	515.36	758.207	292.892	206.514	219.546	0.556668	-0.934239	1.31061	-2.24485	SDHA	chr5:234147:+	chr5_234036_+
chr5:134074361-134074486:mpeak_64904|chr5_134074169_134086448_CAMLG_NM_+|	220.84	-2.411	0.856611	-2.81458	0.00488409	0.0970766	1.25249	0	3.14936	12.4431	14.3128	6.93969	517.279	300.852	378.71	410.623	511.172	493.349	0.551683	-2.93638	-0.241718	-2.69466	CAMLG	-	chr5_134738792_+
chr10:120833253-120833314:mpeak_11815|chr10_120795780_120840334_EIF3A_NM_-|	163.89	-3.15997	1.20459	-2.62326	0.00870916	0.133664	0	0	2.36202	0.957163	4.08938	7.57057	392.03	681.301	239.351	168.461	253.541	217.023	0.539815	-2.41729	1.03857	-3.45586	EIF3A	-	-
chr6:17523692-17523835:mpeak_66898|chr6_17393735_17556589_CAP2_NM_+|	142.815	-2.95336	1.31984	-2.23767	0.0252424	0.230298	2.50498	0	0.787339	5.74298	16.3575	0	261.771	325.136	328.32	269.92	243.318	259.923	0.539591	-2.7469	0.243361	-2.99026	CAP2	-	-
chr3:47953604-47953667:mpeak_54218|chr3_47894529_48130769_MAP4_NM_-|	450.778	-2.1274	0.947056	-2.24633	0.024683	0.22814	12.5249	2.69822	0	1.91433	6.13407	8.20145	1069.63	1477.28	1685.69	371.379	413.027	360.864	0.539496	-0.0941602	1.88585	-1.98002	MAP4	-	-
chr10:5822411-5822473:mpeak_8545|chr10_5808115_5855512_GDI2_NM_-|	1030.72	-2.09468	0.88888	-2.35653	0.0184464	0.197317	10.0199	14.8402	0	11.486	32.715	30.9131	2021.52	2189.61	2769.86	1671.21	1971.08	1645.34	0.534168	-1.59525	0.400811	-1.99606	GDI2	chr10:5822419:-	chr10_5780452_-
chr12:56575025-56575103:mpeak_18333|chr12_56557549_56583351_SMARCC2_NM_-|	287.223	-3.34214	1.10051	-3.0369	0.00239024	0.0646224	0	4.04733	0	1.91433	3.06703	10.725	631.256	751.454	899.141	335.007	479.48	330.581	0.532112	-1.9563	0.994771	-2.95107	SMARCC2	chr12:56575044:-	chr12_56181244_-
chrX:41200724-41200860:mpeak_82170|chrX_41192560_41223526_DDX3X_NR_+mpeak_82170|chrX_41192560_41206892_DDX3X_NM_+||	275.573	-1.99302	0.774185	-2.57435	0.0100428	0.143352	1.25249	0	5.51137	11.486	7.15641	4.41616	635.013	779.786	531.454	469.967	453.921	406.918	0.521299	-1.76938	0.548399	-2.31778	DDX3X	-	chrX_41341520_+
chr20:55092149-55092229:mpeak_50038|chr20_55043640_55093142_RTFDC1_NM_+|	640.486	-1.78013	0.668779	-2.66175	0.00777348	0.127012	12.5249	1.34911	6.29871	29.672	20.4469	16.4029	1151.04	1044.21	1706.95	1345.77	1436.39	914.777	0.516958	-1.72142	0.077956	-1.79938	RTFDC1	-	chr20_56517121_+;chr20_56517191_+
chr2:64812630-64812687:mpeak_43636|chr2_64751438_64819018_AFTPH_NM_+|	173.988	-2.8278	1.34352	-2.10477	0.0353116	0.278933	0	1.34911	0	3.82865	2.04469	6.93969	361.97	228	200.771	384.779	442.675	455.496	0.51184	-3.24753	-0.698188	-2.54934	AFTPH	-	-
chr1:120538624-120538734:mpeak_4404|chr1_120459317_120612317_NOTCH2_NM_-|	186.94	-3.88061	0.755543	-5.13619	2.8037e-07	0.00052121	1.25249	1.34911	7.08605	4.78581	10.2234	10.725	472.189	828.354	604.676	103.374	92.011	107.25	0.50848	-1.40947	2.65431	-4.06378	NOTCH2	-	-
chr10:32326176-32326313:mpeak_9307|chr10_32300444_32345371_KIF5B_NM_-|	367.717	-2.44753	1.0751	-2.27656	0.0228124	0.22053	0	0	3.14936	12.4431	4.08938	12.6176	542.329	995.643	329.108	674.8	950.781	887.649	0.506034	-3.21037	-0.428759	-2.78161	KIF5B	-	-
chr19:12884498-12884570:mpeak_39294|chr19_12874245_12886434_HOOK2_NM_-|	109.289	-3.21761	1.10763	-2.90496	0.00367303	0.0822221	0	1.34911	1.57468	0.957163	5.11172	6.93969	227.953	237.443	419.652	150.275	152.329	107.881	0.49553	-2.15355	1.10843	-3.26198	HOOK2	-	chr19_12773684_-
chr1:32396567-32396650:mpeak_1457|chr1_32374561_32403988_PTP4A2_NM_-|	669.801	-1.85288	0.658114	-2.81545	0.00487097	0.0970766	7.51495	4.04733	0	14.3574	18.4022	13.2485	1362.71	1098.18	1062.12	1608.99	1445.6	1402.45	0.49229	-1.99246	-0.339277	-1.65319	PTP4A2	-	-
chr18:9124911-9124987:mpeak_37178|chr18_9102627_9134183_NDUFV2_NM_+|	415.261	-2.52314	1.07401	-2.34927	0.0188102	0.199282	3.75747	0	0	4.78581	2.04469	12.6176	633.761	737.963	989.685	837.517	834.233	926.763	0.47736	-2.3718	-0.138039	-2.23376	NDUFV2	chr18:9124971:+	-
chr21:37572158-37572213:mpeak_50853|chr21_37536838_37665617_DOPEY2_NM_+|	255.054	-3.53474	1.01178	-3.49358	0.000476589	0.0284494	5.00996	2.69822	0	14.3574	3.06703	1.89264	666.325	964.614	825.131	194.304	173.799	209.452	0.470763	-1.32542	2.08832	-3.41374	DOPEY2	chr21:37572213:+	chr21_36199914_+
chr1:120543919-120544073:mpeak_4406|chr1_120459317_120612317_NOTCH2_NM_-|	187.345	-4.47702	1.11866	-4.00214	6.27725e-05	0.0113225	2.50498	4.04733	2.36202	26.8006	2.04469	2.52352	472.189	828.354	604.676	103.374	92.011	107.25	0.46789	-1.81513	2.65431	-4.46944	NOTCH2	-	-
chr12:58114182-58114298:mpeak_18539|chr12_58087737_58114566_OS9_NM_+|	223.507	-3.21318	1.22081	-2.63201	0.00848804	0.132264	0	0	3.14936	0.957163	0	9.46321	538.571	654.319	834.579	191.433	243.318	206.298	0.466003	-1.72628	1.66117	-3.38745	OS9	-	chr12_57720419_+;chr12_57720441_+;chr12_57720487_+
chrX:16863947-16863998:mpeak_81869|chrX_16863226_16888534_RBBP7_NM_-|	423.159	-2.47692	1.08766	-2.27729	0.0227688	0.22053	3.75747	8.09466	2.36202	37.3293	7.15641	3.78528	553.601	1571.71	957.404	438.38	739.155	755.164	0.461091	-1.76383	0.673586	-2.43742	RBBP7	-	-
chr2:85832354-85832511:mpeak_44272|chr2_85829964_85875883_USP39_NR_+|	195.321	-2.77744	1.00192	-2.77212	0.00556932	0.104785	1.25249	2.69822	0	0.957163	6.13407	8.20145	455.907	455.999	437.76	286.192	345.552	343.199	0.439076	-1.95266	0.469213	-2.42187	USP39	chr2:85832430:+;chr2:85832512:+	chr2_85605306_+
chr10:88818899-88818991:mpeak_10624|chr10_88811627_88854776_GLUD1_NM_-|	213.119	-2.41157	1.04932	-2.29823	0.0215487	0.215423	1.25249	0	3.93669	8.61446	5.11172	0.63088	340.678	768.993	675.537	231.633	223.893	297.145	0.436015	-1.46818	1.246	-2.71418	GLUD1	-	-
chr14:69354592-69354714:mpeak_24751|chr14_69341734_69446083_ACTN1_NM_-|	1509.56	-1.67669	0.5569	-3.01075	0.00260606	0.0688116	27.5548	6.74555	19.6835	21.0576	24.5363	32.1749	3081.13	4125.58	5201.95	1923.9	1809.55	1840.91	0.43505	-0.526663	1.15447	-1.68113	ACTN1	-	chr14_68887923_-
chr17:26961315-26961381:mpeak_33791|chr17_26942264_26972177_KIAA0100_NM_-|	352.462	-2.54776	0.735624	-3.4634	0.0005334	0.0297029	0	1.34911	4.72403	15.3146	17.3799	8.83233	593.681	716.378	833.004	671.928	684.971	681.982	0.425079	-2.77353	0.0718967	-2.84542	KIAA0100	chr17:26961330:-	chr17_28634313_-
chr6:125526013-125526063:mpeak_69650|chr6_125474874_125583979_TPD52L1_NM_+|	298.183	-2.51933	1.08147	-2.32954	0.0198306	0.205676	0	0	2.36202	3.82865	3.06703	11.9867	517.279	685.348	464.53	517.825	782.094	589.873	0.425038	-2.99895	-0.180838	-2.81811	TPD52L1	-	-
chr18:43669269-43669319:mpeak_37859|chr18_43664329_43684199_ATP5A1_NM_-|	555.084	-2.27076	1.12397	-2.02029	0.0433532	0.314933	6.26246	0	0	0	6.13407	5.67792	915.571	2107.31	1587.28	555.154	815.831	661.794	0.407521	-0.915452	1.18136	-2.09681	ATP5A1	-	-
chr10:58120045-58120097:mpeak_9747|chr10_58118220_58121034_ZWINT_NM_-|	441.766	-3.10354	1.05699	-2.93621	0.00332248	0.0773503	3.75747	0	0	13.4003	3.06703	6.93969	701.395	1100.87	1080.23	634.599	991.674	765.258	0.391064	-2.6391	0.269385	-2.90849	ZWINT	-	-
chr20:49571718-49571828:mpeak_49886|chr20_49551773_49575060_DPM1_NM_-|	212.616	-2.14209	1.0268	-2.08617	0.0369632	0.286274	2.50498	0	0.787339	5.74298	6.13407	2.52352	340.678	551.786	398.393	364.679	436.541	441.616	0.382574	-2.12895	0.0546929	-2.18364	DPM1	chr20:49571732:-	chr20_50955156_-
chr3:160282997-160283108:mpeak_57074|chr3_160219990_160283376_KPNA4_NM_-|	205.929	-2.83603	1.30998	-2.16494	0.0303922	0.253379	1.25249	0	0	5.74298	3.06703	3.78528	395.787	335.928	259.034	530.268	463.122	473.16	0.379255	-3.33001	-0.565834	-2.76418	KPNA4	-	-
chr17:7588565-7588629:mpeak_33086|chr17_7573008_7590868_TP53_NM_-|	281.936	-3.36746	1.37845	-2.44293	0.0145685	0.172645	2.50498	0	0	0.957163	1.02234	11.3558	572.388	495.123	987.323	422.109	410.983	479.469	0.36572	-2.41238	0.646639	-3.05902	TP53	chr17:7588533:-;chr17:7588567:-	chr17_7685235_-
chr6:33227830-33227888:mpeak_67653|chr6_33218764_33239742_VPS52_NM_-|	119.781	-5.05186	1.32104	-3.82415	0.000131225	0.0141382	1.25249	0	0	3.82865	6.13407	5.04704	247.993	339.976	440.122	138.789	118.592	135.639	0.36548	-3.58303	1.38729	-4.97032	VPS52	chr6:33227833:-	chr6_33260044_-
chr10:43318473-43318526:mpeak_9513|chr10_43277953_43326313_BMS1_NM_+|	323.805	-1.7897	0.890158	-2.01054	0.0443737	0.318413	2.50498	4.04733	3.14936	2.87149	7.15641	4.41616	454.654	1396.33	852.688	290.02	407.916	459.912	0.358833	-0.574172	1.22347	-1.79765	BMS1	-	-
chr12:6626754-6626806:mpeak_16389|chr12_6603297_6640492_NCAPD2_NM_+|	327.688	-3.01318	0.837954	-3.59588	0.000323297	0.022767	8.76744	1.34911	1.57468	7.6573	2.04469	6.3088	799.089	1404.42	1097.55	155.06	189.134	259.292	0.354165	-0.453619	2.45154	-2.90516	NCAPD2	-	-
chr14:68120122-68120216:mpeak_24701|chr14_68118198_68141602_VTI1B_NM_-|	489.235	-2.7816	1.28998	-2.15631	0.0310592	0.257097	2.50498	0	0	13.4003	0	11.9867	810.362	663.762	666.876	1237.61	1443.55	1020.76	0.351002	-3.34122	-0.789991	-2.55123	VTI1B	-	chr14_67653472_-
chr12:12766213-12766293:mpeak_16691|chr12_12764766_12794927_CREBL2_NM_+|	162.525	-2.72388	1.32457	-2.05643	0.0397414	0.299193	0	0	0.787339	3.82865	9.2011	2.52352	274.296	199.668	199.197	401.051	477.435	382.314	0.350885	-4.30409	-0.905316	-3.39877	CREBL2	chr12:12766283:+	chr12_12613349_+
chr6:152133217-152133277:mpeak_70363|chr6_152011630_152419866_ESR1_NM_+|	261.111	-2.99482	0.996668	-3.00483	0.00265727	0.0691302	1.25249	0	2.36202	17.2289	2.04469	10.725	671.335	439.81	508.621	582.912	452.899	444.14	0.334725	-3.05302	0.130237	-3.18326	ESR1	-	-
chr18:12341260-12341320:mpeak_37281|chr18_12329782_12377275_AFG3L2_NM_-|	308.688	-2.95239	0.838918	-3.51929	0.000432708	0.0262666	1.25249	4.04733	0.787339	7.6573	11.2458	18.9264	579.903	594.958	725.139	604.927	699.284	456.127	0.320377	-2.63567	0.110148	-2.74582	AFG3L2	chr18:12341260:-	-
chr1:164649977-164650027:mpeak_5918|chr1_164528596_164815820_PBX1_NM_+|	446.529	-2.58093	1.27255	-2.02815	0.0425448	0.311595	0	2.69822	0	2.87149	0	10.0941	805.352	814.863	935.359	1002.15	753.468	1031.49	0.316745	-2.26461	-0.125122	-2.13948	PBX1	chr1:164650030:+	chr1_164680792_+
chr17:38796820-38796877:mpeak_34496|chr17_38785245_38804103_SMARCE1_NM_-|	261.429	-4.14926	1.25874	-3.29636	0.000979457	0.0395904	0	1.34911	0	7.6573	11.2458	10.725	495.987	377.751	409.416	576.212	643.055	603.753	0.315421	-4.45688	-0.506636	-3.95025	SMARCE1	chr17:38796826:-	chr17_40640575_-
chr12:72163565-72163639:mpeak_19021|chr12_72148657_72179310_RAB21_NM_+|	173.838	-2.49308	1.1957	-2.08503	0.0370664	0.286743	0	1.34911	0.787339	2.87149	4.08938	5.04704	276.801	464.094	282.655	317.778	390.536	340.045	0.313094	-2.4907	-0.0345514	-2.45615	RAB21	-	-
chr1:117149760-117149812:mpeak_4238|chr1_117120184_117210377_IGSF3_NM_-|	1029.31	-1.82904	0.712833	-2.56588	0.0102916	0.143352	0	10.7929	6.29871	7.6573	5.11172	14.5103	2406.04	2443.24	3529.64	1360.13	1306.56	1261.76	0.305975	-0.674518	1.0928	-1.76732	IGSF3	-	-
chr5:176761044-176761132:mpeak_66194|chr5_176759247_176778885_LMAN2_NM_-|	1477.02	-1.24393	0.606131	-2.05224	0.0401463	0.30049	16.2824	1.34911	13.3848	21.0576	18.4022	14.5103	2885.74	2961.3	4505.94	2290.49	2457.72	2538.03	0.299588	-0.799134	0.506799	-1.30593	LMAN2	chr5:176761053:-	chr5_177334054_-
chr16:1865365-1865422:mpeak_29161|chr16_1859383_1877195_HAGH_NM_-|	378.04	-2.37713	0.722257	-3.29125	0.000997424	0.0395904	1.25249	5.39644	1.57468	8.61446	10.2234	6.3088	792.827	903.904	1076.29	533.14	621.586	575.363	0.296558	-1.61253	0.680614	-2.29314	HAGH	chr16:1865367:-	chr16_1815368_-
chr6:34653237-34653288:mpeak_67777|chr6_34558377_34664627_C6orf106_NM_-|	575.299	-4.11665	1.25373	-3.28351	0.00102522	0.0400164	0	2.69822	0	37.3293	13.2905	7.57057	1027.04	737.963	969.214	1420.43	1584.63	1103.41	0.29605	-4.4307	-0.587473	-3.84323	C6orf106	-	-
chr19:46328071-46328129:mpeak_40892|chr19_46318955_46366548_SYMPK_NM_-|	299.228	-3.2885	1.29809	-2.53333	0.0112985	0.149542	0	0	2.36202	0	2.04469	10.725	725.192	577.419	1127.47	374.251	305.681	465.59	0.291597	-2.43463	1.085	-3.51963	SYMPK	chr19:46328078:-	chr19_45824821_-
chr8:117880964-117881115:mpeak_77409|chr8_117859930_117887105_RAD21_NM_-|	226.547	-4.09902	1.19152	-3.44016	0.000581367	0.0308445	1.25249	1.34911	0	19.1433	13.2905	5.04704	551.096	385.846	418.864	539.84	372.133	410.703	0.287829	-3.84868	0.0356906	-3.88437	RAD21	-	-
chrX:66905846-66905896:mpeak_82665|chrX_66763873_66943527_AR_NM_+|	171.209	-3.9913	1.59553	-2.50155	0.012365	0.157878	1.25249	0	0	0	0	9.46321	329.405	582.816	395.244	192.39	268.877	275.064	0.287386	-2.91753	0.828347	-3.74588	AR	-	-
chr12:67665003-67665057:mpeak_18805|chr12_67663060_67706385_CAND1_NM_+|	426.936	-4.0543	1.04191	-3.89123	9.97388e-05	0.0120007	6.26246	1.34911	0	3.82865	14.3128	10.725	862.966	2342.06	855.05	287.149	319.994	419.536	0.281211	-1.92313	1.98352	-3.90665	CAND1	chr12:67665054:+	chr12_67271273_+
chr7:80377256-80377310:mpeak_72754|chr7_80374623_80548667_SEMA3C_NM_-|	606.008	-2.04236	0.987051	-2.06916	0.0385313	0.293692	0	0	3.93669	4.78581	9.2011	1.89264	1325.14	1944.07	947.169	971.52	998.831	1065.56	0.280101	-2.01211	0.473874	-2.48599	SEMA3C	chr7:80377251:-	chr7_80747940_-
chr2:96860687-96860738:mpeak_44503|chr2_96852652_96874573_STARD7_NM_-|	412.118	-2.76019	0.972227	-2.83903	0.00452504	0.0918365	2.50498	1.34911	0	4.78581	15.3352	10.0941	700.143	754.153	624.36	949.505	1077.55	805.634	0.278119	-2.97081	-0.446523	-2.52428	STARD7	-	-
chr4:17500704-17500849:mpeak_58755|chr4_17488859_17513857_QDPR_NM_-|	282.185	-3.67061	1.15225	-3.1856	0.00144456	0.0481853	0	0	1.57468	6.70014	8.17876	8.83233	507.259	580.117	688.134	563.769	618.518	403.133	0.266066	-3.91244	0.163369	-4.07581	QDPR	-	chr4_17499071_-
chr17:58686837-58686907:mpeak_35725|chr17_58677543_58740355_PPM1D_NM_+|	229.755	-4.76312	1.28924	-3.69451	0.000220315	0.0190318	1.25249	0	0	4.78581	7.15641	12.6176	412.07	567.975	537.752	394.351	376.223	442.878	0.247561	-4.29343	0.322862	-4.61629	PPM1D	-	-
chr2:219103860-219103992:mpeak_47478|chr2_219081816_219118613_ARPC2_NM_+|	1292.88	-2.60708	0.710488	-3.66942	0.000243105	0.019678	7.51495	8.09466	3.93669	18.1861	20.4469	58.6719	2424.82	2988.28	2839.14	2111.5	2717.39	2316.59	0.23686	-2.31562	0.207755	-2.52337	ARPC2	chr2:219103920:+	chr2_218239196_+
chr20:47760281-47760364:mpeak_49740|chr20_47731430_47804904_STAU1_NM_-|	623.945	-2.98352	0.811817	-3.67511	0.000237746	0.019678	2.50498	4.04733	0	7.6573	9.2011	16.4029	1194.88	1479.97	1474.69	1020.34	1270.77	1006.89	0.236857	-2.34377	0.331361	-2.67513	STAU1	chr20:47760278:-;chr20:47760307:-	chr20_49143751_-;chr20_49143798_-;chr20_49143823_-
chrX:53583116-53583180:mpeak_82488|chrX_53560372_53713674_HUWE1_NM_-|	402.722	-3.68691	1.1535	-3.19629	0.00139209	0.0481853	2.50498	0	3.14936	22.9719	1.02234	3.1544	1337.66	1165.63	1079.44	448.909	353.731	414.488	0.236733	-2.26345	1.55758	-3.82103	HUWE1	-	chrX_53556167_-
chr17:58468102-58468259:mpeak_35696|chr17_58256789_58469586_USP32_NM_-|	313.443	-3.10323	1.45248	-2.1365	0.0326386	0.265282	1.25249	0	0	11.486	0	2.52352	438.372	661.064	492.874	587.698	923.177	642.867	0.235976	-3.48353	-0.435724	-3.04781	USP32	-	-
chr2:230656886-230656950:mpeak_47774|chr2_230632466_230786725_TRIP12_NM_-|	362.989	-3.00982	1.0064	-2.99066	0.00278373	0.0711734	2.50498	0	0.787339	8.61446	13.2905	6.3088	511.016	932.235	656.641	670.014	835.256	719.204	0.235178	-3.09922	-0.0831484	-3.01607	TRIP12	-	-
chr8:17104178-17104229:mpeak_74962|chr8_17088357_17104387_CNOT7_NM_-|	352.518	-2.94351	1.31473	-2.23887	0.0251643	0.230189	1.25249	0	0	7.6573	1.02234	5.67792	571.136	603.052	432.249	737.015	924.2	946.952	0.233901	-3.51894	-0.699171	-2.81977	CNOT7	-	-
chr9:132597415-132597496:mpeak_81078|chr9_132590531_132597572_C9orf78_NM_-|	292.997	-3.36833	1.31111	-2.56908	0.010197	0.143352	0	1.34911	0	6.70014	2.04469	3.78528	460.917	670.508	599.165	558.983	555.133	657.377	0.23387	-3.21532	-0.0337027	-3.18162	C9orf78	-	-
chr2:219103444-219103586:mpeak_47477|chr2_219081816_219118613_ARPC2_NM_+|	1286.29	-2.73525	0.982436	-2.78415	0.00536684	0.101864	6.26246	0	0	14.3574	2.04469	15.1411	2424.82	2988.28	2839.14	2111.5	2717.39	2316.59	0.227664	-2.33253	0.207755	-2.54029	ARPC2	chr2:219103482:+	chr2_218238771_+
chrX:53706811-53706862:mpeak_82503|chrX_53560372_53713674_HUWE1_NM_-|	401.214	-4.0764	1.15271	-3.53637	0.000405664	0.0250767	0	2.69822	0	2.87149	4.08938	5.04704	1337.66	1165.63	1079.44	448.909	353.731	414.488	0.225935	-2.1539	1.55758	-3.71148	HUWE1	chrX:53706809:-	-
chr10:70716446-70716507:mpeak_10029|chr10_70715878_70742298_DDX21_NM_+|	1095.36	-1.77181	0.76208	-2.32497	0.0200738	0.207132	3.75747	12.142	0.787339	14.3574	11.2458	12.6176	2205.64	3475.31	1817.97	1835.84	2231.78	1522.95	0.222523	-1.19565	0.423688	-1.61934	DDX21	-	chr10_68956745_+
chr12:124069313-124069374:mpeak_20888|chr12_124069075_124081151_TMED2_NM_+|	310.28	-2.07415	1.05555	-1.965	0.0494144	0.335769	1.25249	0	1.57468	8.61446	1.02234	3.1544	522.289	816.212	568.459	540.797	637.943	622.048	0.222383	-2.17772	0.0826456	-2.26037	TMED2	-	-
chr16:75667179-75667329:mpeak_31854|chr16_75661891_75681585_KARS_NM_-|	742.23	-2.71263	1.02922	-2.63561	0.00839865	0.131605	3.75747	0	0	9.57163	1.02234	5.04704	1452.89	1934.62	1728.21	1055.75	1411.86	1304.03	0.220349	-2.0575	0.439747	-2.49725	KARS	chr16:75667178:-	chr16_75633281_-
chr20:46362918-46362999:mpeak_49643|chr20_46287136_46415360_SULF2_NM_-|	548.781	-1.94352	0.7517	-2.58551	0.00972363	0.141222	2.50498	2.69822	3.93669	7.6573	8.17876	5.04704	1251.24	1131.9	1827.41	720.743	621.586	1002.47	0.217071	-1.19209	0.844547	-2.03663	SULF2	chr20:46362917:-;chr20:46362943:-	chr20_47734180_-
chr7:5938491-5938554:mpeak_71090|chr7_5938340_5965262_CCZ1_NM_+|	305.455	-3.57456	1.47817	-2.41823	0.0155963	0.180564	1.25249	0	0	5.74298	0	8.20145	316.88	914.697	555.861	434.552	724.842	703.432	0.210216	-3.47682	-0.0595994	-3.41722	CCZ1	-	-
chr10:3113439-3113559:mpeak_8462|chr10_3109711_3178641_PFKP_NM_+|	927.317	-2.84354	0.966167	-2.94312	0.00324928	0.0769988	5.00996	0	0	2.87149	9.2011	3.78528	2136.75	1985.89	3346.98	1197.41	1289.18	1150.73	0.201214	-1.66233	1.03816	-2.70049	PFKP	chr10:3113494:+;chr10:3113557:+	chr10_3071320_+;chr10_3071365_+
chr17:80739551-80739601:mpeak_37011|chr17_80709939_80900324_TBCD_NM_+|	507.637	-2.68058	0.941135	-2.84824	0.00439622	0.0903102	5.00996	0	0.787339	4.78581	4.08938	5.04704	1347.68	899.857	2080.15	685.328	491.748	567.162	0.200938	-1.26394	1.311	-2.57494	TBCD	-	-
chr12:51778045-51778110:mpeak_17895|chr12_51748276_51785200_GALNT6_NM_-|	1061.8	-2.33513	0.96468	-2.42062	0.015494	0.179997	5.00996	0	0	6.70014	6.13407	3.1544	2625.22	1921.13	2952.52	2064.6	1911.78	1245.36	0.200429	-1.67417	0.522143	-2.19631	GALNT6	-	-
chr3:63821975-63822039:mpeak_54770|chr3_63819875_63849599_THOC7_NM_-|	725.425	-3.16545	1.31052	-2.41542	0.0157172	0.18134	2.50498	0	0	5.74298	4.08938	12.6176	771.535	2285.39	926.698	1120.84	1474.22	2101.46	0.188646	-3.16384	-0.237511	-2.92633	THOC7	-	-
chr2:216979796-216979878:mpeak_47419|chr2_216974019_217069910_XRCC5_NM_+|	1072.58	-1.59929	0.762728	-2.09681	0.0360107	0.280834	5.00996	4.04733	7.87339	3.82865	4.08938	11.9867	1841.16	3716.8	3646.17	962.906	1329.05	1338.1	0.183947	-0.233473	1.34229	-1.57576	XRCC5	chr2:216979873:+	chr2_216115155_+
chr20:46317593-46317644:mpeak_49628|chr20_46287136_46415360_SULF2_NM_-|	549.161	-2.83244	1.03498	-2.7367	0.00620583	0.110915	5.00996	1.34911	0.787339	3.82865	20.4469	3.1544	1251.24	1131.9	1827.41	720.743	621.586	1002.47	0.169726	-1.94046	0.844547	-2.78501	SULF2	chr20:46317592:-	chr20_47688852_-
chr12:133404251-133404310:mpeak_21191|chr12_133349880_133405426_GOLGA3_NM_-|	383.232	-2.70601	1.01835	-2.65724	0.00787834	0.127914	1.25249	0	1.57468	5.74298	7.15641	4.41616	665.073	994.294	862.923	501.553	771.87	782.923	0.168131	-2.61464	0.294651	-2.90929	GOLGA3	chr12:133404250:-	chr12_132827669_-
chr1:117147897-117147957:mpeak_4237|chr1_117120184_117210377_IGSF3_NM_-|	1027.51	-1.51052	0.754838	-2.00112	0.0453792	0.321186	0	5.39644	3.93669	4.78581	6.13407	2.52352	2406.04	2443.24	3529.64	1360.13	1306.56	1261.76	0.167083	-0.526465	1.0928	-1.61927	IGSF3	-	chr1_116605281_-
chr2:242283156-242283214:mpeak_48176|chr2_242254601_242291381_SEPT2_NM_+|	367.912	-4.07807	1.30133	-3.13377	0.00172577	0.05547	0	1.34911	0	6.70014	1.02234	7.57057	740.222	781.135	907.014	656.614	574.558	738.761	0.166669	-3.5028	0.301843	-3.80464	SEPT2	-	-
chr3:13459495-13459561:mpeak_53231|chr3_13359281_13461819_NUP210_NM_-|	1194.99	-4.15429	0.986622	-4.21062	2.54668e-05	0.00613281	12.5249	0	0.787339	11.486	6.13407	22.0808	2774.27	4495.24	4841.35	631.727	684.971	859.259	0.16488	-1.57641	2.47658	-4.05299	NUP210	chr3:13459506:-	chr3_13418008_-
chr1:151957538-151957591:mpeak_5193|chr1_151955800_151966714_S100A10_NM_-|	1782.47	-2.14404	0.931877	-2.30077	0.0214045	0.2143	0	5.39644	0	3.82865	9.2011	8.20145	3037.29	4395.4	2749.39	3025.59	4194.68	3960.67	0.158998	-1.97611	-0.135009	-1.8411	S100A10	chr1:151957540:-	chr1_151985013_-;chr1_151985063_-
chr2:136740976-136741035:mpeak_45593|chr2_136664977_136743254_DARS_NM_-|	424.237	-2.91359	0.85726	-3.39872	0.000677028	0.0330566	1.25249	1.34911	1.57468	12.4431	5.11172	10.725	908.056	856.685	902.29	807.845	907.842	675.673	0.156589	-2.75948	0.157403	-2.91689	DARS	-	chr2_135983444_-
chr10:3167600-3167660:mpeak_8469|chr10_3109711_3178641_PFKP_NM_+|	927.829	-1.47301	0.717339	-2.05343	0.0400309	0.300366	1.25249	5.39644	4.72403	3.82865	6.13407	5.67792	2136.75	1985.89	3346.98	1197.41	1289.18	1150.73	0.152256	-0.459691	1.03816	-1.49785	PFKP	chr10:3167657:+	chr10_3125464_+
chr14:69354139-69354213:mpeak_24750|chr14_69341734_69446083_ACTN1_NM_-|	1502.83	-1.98093	0.604381	-3.27762	0.00104688	0.0403079	7.51495	2.69822	7.87339	12.4431	7.15641	13.2485	3081.13	4125.58	5201.95	1923.9	1809.55	1840.91	0.145758	-0.860889	1.15447	-2.01536	ACTN1	-	-
chr1:2323870-2323944:mpeak_172|chr1_2323213_2334473_RER1_NM_+|	296.637	-3.34431	1.35477	-2.46856	0.013566	0.166491	0	0	0.787339	9.57163	0	3.78528	465.927	686.697	525.942	596.312	670.658	599.967	0.140716	-4.08446	-0.153444	-3.93101	RER1	chr1:2323939:+	chr1_2392513_+
chr12:10865711-10865864:mpeak_16612|chr12_10852253_10875953_YBX3_NM_-|	753.483	-2.32025	0.894287	-2.59452	0.00947225	0.140582	1.25249	0	2.36202	14.3574	7.15641	5.67792	1206.15	1266.81	1517.2	1393.63	1725.72	1901.47	0.135878	-2.9113	-0.331475	-2.57982	YBX3	chr12:10865710:-	chr12_10713110_-
chr20:46258961-46259022:mpeak_49597|chr20_46130600_46282149_NCOA3_NM_+|	1306.43	-2.0702	0.822454	-2.5171	0.0118326	0.154213	5.00996	1.34911	0	6.70014	8.17876	11.3558	2348.42	2315.07	2544.68	2493.41	2359.57	3583.4	0.132331	-2.04459	-0.226991	-1.8176	NCOA3	chr20:46259018:+	chr20_47630271_+
chr3:196530754-196530824:mpeak_58039|chr3_196466727_196555189_PAK2_NM_+|	622.524	-3.08337	1.40836	-2.18934	0.0285721	0.248736	0	0	1.57468	13.4003	6.13407	0	1447.88	1042.86	1090.46	1399.37	1293.27	1175.33	0.131912	-3.63288	-0.11113	-3.52175	PAK2	chr3:196530805:+	chr3_196803942_+
chr19:36037037-36037091:mpeak_40228|chr19_36036501_36038225_TMEM147_NM_+|	1099.78	-2.83923	1.17268	-2.42114	0.0154721	0.179997	0	2.69822	0	6.70014	6.13407	4.41616	2198.12	1733.61	2378.55	2570.94	2713.3	1582.88	0.128277	-2.67655	-0.122001	-2.55455	TMEM147	chr19:36037089:+	chr19_35546186_+
chr1:117182785-117182844:mpeak_4242|chr1_117120184_117210377_IGSF3_NM_-|	1027.87	-1.73626	0.688364	-2.52229	0.0116592	0.153138	2.50498	4.04733	3.93669	4.78581	6.13407	5.67792	2406.04	2443.24	3529.64	1360.13	1306.56	1261.76	0.125183	-0.662114	1.0928	-1.75492	IGSF3	-	chr1_116640167_-
chr1:1479238-1479294:mpeak_100|chr1_1477547_1510262_SSU72_NM_-|	542.433	-3.28852	1.33799	-2.45781	0.0139789	0.170018	1.25249	0	0	9.57163	0	3.78528	1070.88	934.933	1006.22	1240.48	1279.98	962.093	0.124749	-3.41471	-0.209407	-3.20531	SSU72	-	-
chr1:120484841-120484891:mpeak_4396|chr1_120459317_120612317_NOTCH2_NM_-|	184.951	-5.97331	1.376	-4.34107	1.41788e-05	0.0056198	0	0	0.787339	3.82865	0	6.93969	472.189	828.354	604.676	103.374	92.011	107.25	0.123976	-3.77367	2.65431	-6.42798	NOTCH2	-	chr1_119942218_-
chr1:117208559-117208610:mpeak_4248|chr1_117120184_117210377_IGSF3_NM_-|	1027.29	-1.9997	0.782535	-2.55541	0.0106062	0.145239	3.75747	0	3.14936	3.82865	3.06703	6.3088	2406.04	2443.24	3529.64	1360.13	1306.56	1261.76	0.123647	-0.934933	1.0928	-2.02774	IGSF3	chr1:117208558:-	chr1_116665937_-
chr17:58570695-58570755:mpeak_35714|chr17_58525195_58603601_APPBP2_NM_-|	863.679	-2.49084	0.80653	-3.08835	0.00201272	0.0602742	1.25249	1.34911	3.14936	4.78581	13.2905	18.2955	1675.83	1729.56	1612.47	1593.68	1547.83	2162.66	0.11461	-2.66095	-0.0800524	-2.5809	APPBP2	chr17:58570704:-	chr17_60493343_-
chr1:155659813-155659891:mpeak_5490|chr1_155658881_155707947_DAP3_NM_+|	473.436	-4.99283	1.59853	-3.12339	0.00178782	0.0562912	1.25249	0	0	21.0576	5.11172	0.63088	602.448	1342.36	1388.08	619.284	740.178	960.831	0.112739	-4.41937	0.522467	-4.94184	DAP3	chr1:155659893:+	chr1_155690099_+
chr20:46266822-46266926:mpeak_49603|chr20_46130600_46282149_NCOA3_NM_+|	1305.59	-2.93775	1.14358	-2.56891	0.0102019	0.143352	0	2.69822	0	8.61446	6.13407	5.04704	2348.42	2315.07	2544.68	2493.41	2359.57	3583.4	0.112298	-2.8751	-0.226991	-2.64811	NCOA3	-	chr20_47638155_+
chr17:75484796-75484848:mpeak_36631|chr17_75277491_75494604_SEPT9_NM_+|	948.715	-2.41737	0.942409	-2.5651	0.0103146	0.143352	3.75747	0	0.787339	8.61446	3.06703	2.52352	2210.65	2158.58	2768.28	1307.48	1724.7	1196.15	0.0955126	-1.64411	0.755333	-2.39944	SEPT9	-	-
chr4:95373677-95373736:mpeak_60170|chr4_95373007_95376969_PDLIM5_NR_+mpeak_60170|chr4_95373007_95585128_PDLIM5_NM_+||	573.533	-3.63751	1.03194	-3.52491	0.000423621	0.0259487	0	1.34911	1.57468	2.87149	13.2905	3.78528	1560.6	1363.95	1706.95	741.801	846.501	639.713	0.0946924	-2.77028	1.05572	-3.826	PDLIM5	chr4:95373735:+	chr4_94452601_+
chr17:4869112-4869217:mpeak_32870|chr17_4862938_4871132_SPAG7_NM_-|	720.454	-3.58549	1.33793	-2.67988	0.00736479	0.123443	0	1.34911	0	5.74298	2.04469	5.04704	1193.62	1223.64	2062.04	1316.1	1629.62	1206.24	0.0903562	-3.24997	0.109483	-3.35945	SPAG7	chr17:4869111:-;chr17:4869148:-	chr17_4965804_-
chr14:77924502-77924617:mpeak_25249|chr14_77924372_77935419_AHSA1_NM_+|	2246.67	-1.49339	0.753611	-1.98165	0.0475188	0.330922	5.00996	0	3.93669	12.4431	2.04469	5.67792	4467.64	5014.64	5882.21	3382.61	4272.38	3911.46	0.0873442	-1.17248	0.409654	-1.58214	AHSA1	-	-
chr3:184051072-184051123:mpeak_57636|chr3_184032282_184052514_EIF4G1_NM_+|	1491.07	-4.18581	1.30641	-3.20405	0.00135507	0.0475545	3.75747	0	0	7.6573	0	10.725	1881.24	6320.58	5440.51	1176.35	1417.99	1633.98	0.0826282	-2.29048	1.68993	-3.98041	EIF4G1	-	-
chr3:10354861-10354979:mpeak_53140|chr3_10343058_10362872_SEC13_NM_-|	1848.68	-1.51104	0.759251	-1.99018	0.0465714	0.326873	1.25249	0	5.51137	5.74298	5.11172	7.57057	3434.33	4194.38	4654.75	2576.68	3574.12	3724.72	0.0825972	-1.44577	0.314789	-1.76056	SEC13	-	-
chr17:57970559-57970697:mpeak_35623|chr17_57970406_58023911_RPS6KB1_NM_+|	1265.83	-3.40546	1.3149	-2.58989	0.00960065	0.141076	1.25249	0	0	7.6573	8.17876	10.0941	2163.05	1749.8	987.323	3781.75	3060.9	3420	0.0766805	-4.37176	-1.0665	-3.30526	RPS6KB1	-	-
chr9:100770049-100770106:mpeak_79843|chr9_100745488_100777645_ANP32B_NM_+|	2097.66	-2.83596	1.13532	-2.49794	0.0124916	0.157878	0	2.69822	0	5.74298	8.17876	5.04704	3387.99	3422.69	4613.81	4412.52	4269.31	5043.89	0.0708536	-2.81355	-0.264752	-2.54879	ANP32B	chr9:100770102:+	chr9_98007823_+
chr20:47439289-47439373:mpeak_49694|chr20_47242465_47444420_PREX1_NM_-|	744.875	-4.34375	1.28436	-3.38204	0.00071949	0.0335201	1.25249	1.34911	0	13.4003	7.15641	1.26176	1317.62	2235.48	2517.91	868.147	839.345	1135.58	0.0642793	-3.06808	1.09448	-4.16256	PREX1	-	-
chr4:109572108-109572230:mpeak_60548|chr4_109571740_109588402_OSTC_NM_+|	1373.34	-2.94136	1.29107	-2.27822	0.0227132	0.22053	1.25249	0	0	7.6573	3.06703	3.78528	2131.74	1976.45	2300.6	2910.73	3903.31	3241.46	0.05863	-3.53414	-0.649862	-2.88428	OSTC	chr4:109572233:+	chr4_108651074_+
chr11:62555340-62555402:mpeak_13927|chr11_62554873_62557357_TMEM179B_NM_+|	806.773	-3.78559	1.42292	-2.66044	0.00780394	0.127012	0	0	0.787339	11.486	2.04469	2.52352	1605.69	978.105	2351.78	1894.22	1362.79	1471.84	0.0478569	-4.34982	0.0617288	-4.41155	TMEM179B	chr11:62555403:+	chr11_62787930_+;chr11_62787970_+
chr19:47280122-47280199:mpeak_40942|chr19_47279004_47291842_SLC1A5_NM_-|	3383.84	-3.69084	1.03006	-3.58313	0.0003395	0.0233424	5.00996	0	0	3.82865	2.04469	8.83233	7707.83	8587.09	15579.1	2726	2815.54	3170.81	0.0471541	-1.5535	1.87125	-3.42475	SLC1A5	-	chr19_46776888_-
chr16:68715528-68715578:mpeak_31370|chr16_68678150_68732093_CDH3_NM_+|	1126.39	-4.73966	1.59638	-2.96901	0.00298761	0.0737382	0	0	1.57468	0	0	11.3558	2370.97	3340.4	5253.12	652.785	815.831	1070.6	0.0430848	-2.85031	2.11038	-4.96069	CDH3	-	-
chr19:42368346-42368439:mpeak_40663|chr19_42363987_42375418_RPS19_NM_+|	3735.29	-2.74221	1.21906	-2.24945	0.0244839	0.228025	2.50498	0	0	12.4431	0	5.04704	6097.13	7020.77	7192.34	8026.77	8562.14	7904.3	0.0370008	-2.80367	-0.270174	-2.5335	RPS19	-	chr19_41864326_+
chr16:18537689-18537740:mpeak_29946|chr16_18511825_18573434_NOMO2_NM_-|	1158.64	-5.82538	1.36831	-4.25736	2.06856e-05	0.00610935	0	1.34911	0	5.74298	9.2011	0.63088	3078.62	3759.97	4603.57	723.615	919.088	801.849	0.0353721	-3.52915	2.22672	-5.75587	NOMO2	chr16:18537687:-	-
chr20:43516296-43516391:mpeak_49431|chr20_43514239_43535022_YWHAB_NM_+|	4470.38	-2.34033	1.03641	-2.25811	0.0239389	0.225911	2.50498	0	0.787339	12.4431	6.13407	2.52352	8709.82	6504.06	8785.91	11054.3	10480.1	8086	0.0205772	-2.68011	-0.303565	-2.37655	YWHAB	-	-
chr4:102015006-102015125:mpeak_60320|chr4_101947218_102268628_PPP3CA_NM_-|	6854.24	-1.84116	0.913229	-2.0161	0.0437899	0.316924	2.50498	0	1.57468	5.74298	0	7.57057	12994.6	14992.7	14194.1	12657.5	12570.7	14823.8	0.0145076	-1.70637	0.0747304	-1.7811	PPP3CA	-	chr4_101093909_-
chr19:3980661-3980738:mpeak_38639|chr19_3976745_3985461_EEF2_NM_-|	8414.01	-2.99024	0.782306	-3.82234	0.000132192	0.0141382	1.25249	0	5.51137	4.78581	3.06703	8.20145	20811.4	27990	31333.7	7202.65	7496.85	6110.71	0.0126609	-1.24704	1.94514	-3.19218	EEF2	chr19:3980637:-;chr19:3980685:-	chr19_3980642_-;chr19_3980690_-
chr1:115290930-115291068:mpeak_4150|chr1_115260837_115300671_CSDE1_NM_-|	19202.4	-3.16874	1.34961	-2.34789	0.0188802	0.199709	0	0	0.787339	3.82865	0	9.46321	34653.9	32734.8	29139.4	51343.2	39096.5	43447.5	0.00244697	-4.07741	-0.471996	-3.60542	CSDE1	-	chr1_114748309_-
chr2:43919744-43919806:mpeak_43120|chr2_43864438_43992551_PLEKHH2_NM_+|	3.21392	-7.56342	2.63095	-2.87478	0.00404304	0.0878774	0	0	0	1.91433	5.11172	10.0941	0	2.69822	15.7468	0.957163	2.04469	0	#DIV/0!	-Inf	2.6193	-Inf	PLEKHH2	-	-
chr10:79795894-79795957:mpeak_10450|chr10_79793517_79814288_RPS24_NM_+|	3.78057	-7.29984	2.37186	-3.07769	0.00208611	0.0616277	0	0	0	7.6573	4.08938	7.57057	0	12.142	9.44807	3.82865	0	0.63088	#DIV/0!	-Inf	2.2754	-Inf	RPS24	chr10:79795945:+	chr10_78036195_+
chr10:27456237-27456311:mpeak_9171|chr10_27443752_27475307_MASTL_NM_+|	6.28194	-7.03239	1.92337	-3.6563	0.000255886	0.0202842	0	0	0	3.82865	7.15641	8.83233	1.25249	33.7278	9.44807	2.87149	5.11172	3.1544	#DIV/0!	-Inf	1.99604	-Inf	MASTL	-	chr10_27167382_+
chr11:62413131-62413280:mpeak_13879|chr11_62393396_62414198_GANAB_NM_-|	8381.57	-7.00261	1.35746	-5.15861	2.48793e-07	0.00052121	0	0	0	14.3574	5.11172	3.78528	16858.5	27806.5	33267.4	6845.63	7861.83	7915.66	#DIV/0!	-Inf	1.78443	-Inf	GANAB	chr11:62413222:-	chr11_62645750_-
chr15:63933467-63933517:mpeak_27683|chr15_63901465_64126147_HERC1_NM_-|	21.3279	-6.75422	1.83387	-3.68303	0.000230474	0.0194116	0	0	0	9.57163	0	3.78528	22.5448	143.006	36.2176	12.4431	8.17876	20.1882	#DIV/0!	-Inf	2.3057	-Inf	HERC1	-	-
chr3:127381356-127381524:mpeak_55957|chr3_127348001_127391110_PODXL2_NM_+|	8.26732	-6.66008	1.7112	-3.89204	9.94029e-05	0.0120007	0	0	0	5.74298	4.08938	3.78528	22.5448	6.74555	40.9416	5.74298	2.04469	7.57057	#DIV/0!	-Inf	2.19312	-Inf	PODXL2	chr3:127381407:+;chr3:127381449:+;chr3:127381525:+	chr3_127662563_+;chr3_127662681_+
chr1:223010500-223010550:mpeak_7626|chr1_222988430_223175726_DISP1_NM_+|	3.79347	-6.63621	2.40253	-2.76218	0.00574169	0.105993	0	0	0	2.87149	2.04469	6.3088	0	10.7929	18.1088	2.87149	0	2.52352	#DIV/0!	-Inf	2.42146	-Inf	DISP1	-	-
chr10:103921742-103921801:mpeak_11327|chr10_103911932_103921867_NOLC1_NM_+|	360.545	-6.46105	1.45885	-4.42885	9.47355e-06	0.00455948	0	0	0	13.4003	0	6.93969	650.043	1419.26	1042.44	379.994	428.362	386.099	#DIV/0!	-Inf	1.38137	-Inf	NOLC1	-	-
chr5:128869040-128869094:mpeak_64638|chr5_128796102_129072759_ADAMTS19_NM_+|	35.3084	-6.37998	1.40597	-4.53778	5.6849e-06	0.00348226	0	0	0	4.78581	4.08938	12.6176	96.4418	124.118	58.2631	36.3722	46.0055	41.0072	#DIV/0!	-Inf	1.17618	-Inf	ADAMTS19	chr5:128869091:+	-
chr3:47951086-47951141:mpeak_54215|chr3_47894529_48130769_MAP4_NM_-|	449.212	-6.37214	1.34323	-4.74391	2.09631e-06	0.00176561	0	0	0	5.74298	0	6.93969	1069.63	1477.28	1685.69	371.379	413.027	360.864	#DIV/0!	-Inf	1.88585	-Inf	MAP4	-	-
chr8:141466613-141466663:mpeak_77857|chr8_140743471_141468678_TRAPPC9_NM_-|	185.883	-6.25752	1.3424	-4.66146	3.13978e-06	0.00211558	0	0	0	1.91433	6.13407	4.41616	425.847	553.135	769.23	165.589	168.687	135.639	#DIV/0!	-Inf	1.89541	-Inf	TRAPPC9	chr8:141466612:-	chr8_140456514_-
chr17:73543693-73543743:mpeak_36464|chr17_73521782_73570951_LLGL2_NM_+|	504.904	-6.21756	1.50939	-4.11925	3.80111e-05	0.00853729	0	0	0	4.78581	0	11.9867	782.807	1498.86	2054.17	459.438	672.703	574.101	#DIV/0!	-Inf	1.34549	-Inf	LLGL2	-	-
chr5:14287180-14287348:mpeak_62188|chr5_14143828_14507988_TRIO_NM_+|	33.1952	-6.05187	1.5331	-3.94748	7.89788e-05	0.0113225	0	0	0	11.486	1.02234	11.3558	70.1395	110.627	52.7517	27.7577	71.5641	41.6381	#DIV/0!	-Inf	0.72825	-Inf	TRIO	chr5:14287291:+	chr5_14287181_+
chr22:31884613-31884735:mpeak_52119|chr22_31836107_31885874_EIF4ENIF1_NM_-|	18.1056	-5.99194	1.61593	-3.70804	0.000208873	0.0187282	0	0	0	9.57163	0	8.20145	42.5847	59.3609	33.8556	12.4431	31.6927	19.5573	#DIV/0!	-Inf	1.09229	-Inf	EIF4ENIF1	-	-
chr16:29897247-29897305:mpeak_30486|chr16_29883049_29910585_SEZ6L2_NM_-|	133.981	-5.91193	1.34358	-4.40014	1.08181e-05	0.00485949	0	0	0	0.957163	5.11172	7.57057	335.668	319.739	487.363	156.018	136.994	158.351	#DIV/0!	-Inf	1.34018	-Inf	SEZ6L2	chr16:29897246:-	chr16_29885924_-
chr16:3181657-3181727:mpeak_29354|chr16_3175967_3184883_ZNF213-AS1_NR_-|	4.73161	-5.87047	2.31787	-2.5327	0.0113189	0.149542	0	0	0	4.78581	12.2681	8.83233	10.0199	1.34911	6.29871	0.957163	12.2681	0	#DIV/0!	-Inf	0.417818	-Inf	ZNF213-AS1	chr16:3181669:-	chr16_3131656_-
chr15:66064165-66064394:mpeak_27835|chr15_65954325_66084631_DENND4A_NM_-|	3.83856	-5.86985	1.97209	-2.97647	0.00291591	0.0730386	0	0	0	10.5288	3.06703	2.52352	2.50498	13.4911	4.72403	0.957163	5.11172	3.1544	#DIV/0!	-Inf	1.16768	-Inf	DENND4A	-	-
chr10:22094479-22094536:mpeak_9025|chr10_22045684_22292650_DNAJC1_NM_-|	125.797	-5.81449	1.37054	-4.24249	2.2105e-05	0.00610935	0	0	0	3.82865	9.2011	12.6176	169.086	415.526	254.31	228.762	197.313	218.916	#DIV/0!	-Inf	0.379261	-Inf	DNAJC1	chr10:22094482:-	chr10_21805546_-
chr8:102515458-102515520:mpeak_77081|chr8_102504667_102678816_GRHL2_NM_+|	116.421	-5.81035	1.35723	-4.28104	1.86019e-05	0.00610935	0	0	0	7.6573	2.04469	13.8794	235.468	244.189	314.936	183.775	163.575	231.533	#DIV/0!	-Inf	0.456943	-Inf	GRHL2	-	-
chr3:14697045-14697146:mpeak_53288|chr3_14693252_14712402_CCDC174_NM_+|	7.46027	-5.78632	1.68971	-3.42445	0.000616041	0.0319299	0	0	0	8.61446	5.11172	7.57057	21.2923	14.8402	5.51137	16.2718	7.15641	3.1544	#DIV/0!	-Inf	0.647625	-Inf	CCDC174	-	chr3_14655546_+;chr3_14655621_+
chr3:10082318-10082368:mpeak_53108|chr3_10068112_10142871_FANCD2_NM_+|	262.097	-5.75576	1.3716	-4.19639	2.712e-05	0.00630119	0	0	0	1.91433	11.2458	2.52352	588.671	916.046	650.342	293.849	367.022	313.548	#DIV/0!	-Inf	1.14511	-Inf	FANCD2	chr3:10082370:+	chr3_10040684_+
chr1:3750535-3750695:mpeak_221|chr1_3732081_3773797_CEP104_NM_-|	8.91181	-5.7488	1.61668	-3.55592	0.000376657	0.0244044	0	0	0	2.87149	10.2234	5.04704	20.0399	26.9822	10.2354	16.2718	10.2234	5.04704	#DIV/0!	-Inf	0.860178	-Inf	CEP104	-	-
chr20:46390210-46390264:mpeak_49650|chr20_46287136_46415360_SULF2_NM_-|	547.8	-5.72229	1.75521	-3.26017	0.00111346	0.0422896	0	0	0	17.2289	1.02234	0	1251.24	1131.9	1827.41	720.743	621.586	1002.47	#DIV/0!	-Inf	0.844547	-Inf	SULF2	-	chr20_47761470_-
chr5:111312225-111312292:mpeak_64213|chr5_111066743_111312628_NREP_NM_-mpeak_64213|chr5_111066743_111312628_NREP_NM_-||	15.5495	-5.70627	1.47184	-3.87697	0.000105765	0.0123158	0	0	0	2.87149	6.13407	3.78528	31.3123	40.4733	51.9644	11.486	26.581	11.9867	#DIV/0!	-Inf	1.30588	-Inf	NREP	-	-
chr19:21123723-21123777:mpeak_39831|chr19_21106058_21125606_ZNF85_NR_+mpeak_39831|chr19_21106058_21131549_ZNF85_NM_+||	3.66252	-5.68316	2.13582	-2.66088	0.00779359	0.127012	0	0	0	7.6573	3.06703	3.1544	0	16.1893	4.72403	1.91433	4.08938	3.1544	#DIV/0!	-Inf	1.1913	-Inf	ZNF85	chr19:21123776:+	chr19_20940967_+
chr17:35910605-35910655:mpeak_34265|chr17_35879174_35969486_SYNRG_NM_-mpeak_34265|chr17_35879174_35969486_SYNRG_NM_-||	87.9902	-5.61656	1.37722	-4.07819	4.53873e-05	0.00926726	0	0	0	0.957163	4.08938	10.725	220.438	256.331	185.812	131.131	127.793	118.606	#DIV/0!	-Inf	0.811507	-Inf	SYNRG	chr17:35910602:-	chr17_37550503_-
chr4:84519838-84519887:mpeak_59988|chr4_84457066_84525820_AGPAT9_NM_+|	21.4884	-5.58669	1.6569	-3.37176	0.000746884	0.0340034	0	0	0	14.3574	2.04469	1.89264	63.877	18.8875	65.3491	38.2865	23.5139	29.6514	#DIV/0!	-Inf	0.695622	-Inf	AGPAT9	-	-
chr12:57557518-57557634:mpeak_18480|chr12_57522281_57606197_LRP1_NM_+|	6.31881	-5.57857	2.30043	-2.42501	0.015308	0.178761	0	0	0	0	8.17876	4.41616	12.5249	8.09466	23.6202	0	5.11172	13.8794	#DIV/0!	-Inf	1.22002	-Inf	LRP1	chr12:57557586:+;chr12:57557638:+	chr12_57163797_+;chr12_57163850_+
chr17:17000135-17000206:mpeak_33401|chr17_16946073_17088136_MPRIP_NM_+|	76.5766	-5.52628	1.39842	-3.95181	7.75638e-05	0.0113225	0	0	0	15.3146	1.02234	8.20145	170.339	175.384	129.124	142.617	156.419	120.498	#DIV/0!	-Inf	0.178674	-Inf	MPRIP	chr17:17000207:+	chr17_17096892_+
chrX:57358724-57358774:mpeak_82600|chrX_57313109_57515189_FAAH2_NM_+|	8.94415	-5.52591	1.53594	-3.59773	0.000321005	0.022767	0	0	0	4.78581	4.08938	6.3088	21.2923	18.8875	19.6835	4.78581	9.2011	18.2955	#DIV/0!	-Inf	0.890923	-Inf	FAAH2	chrX:57358776:+	chrX_57332342_+
chr1:12412400-12412453:mpeak_583|chr1_12290095_12568946_VPS13D_NM_+|	82.5318	-5.47747	1.62418	-3.37246	0.00074501	0.0340034	0	0	0	0.957163	0	10.725	141.532	329.183	195.26	83.2731	124.726	104.726	#DIV/0!	-Inf	1.09057	-Inf	VPS13D	-	chr1_12352420_+
chr2:32697546-32697599:mpeak_42823|chr2_32582095_32842791_BIRC6_NM_+|	28.0811	-5.45878	1.48858	-3.6671	0.000245318	0.019678	0	0	0	4.78581	3.06703	5.67792	57.6146	117.373	38.5796	22.0147	53.1619	34.6984	#DIV/0!	-Inf	0.958823	-Inf	BIRC6	-	chr2_32472560_+
chr10:112359537-112359587:mpeak_11538|chr10_112327448_112363988_SMC3_NM_+|	15.8974	-5.44649	2.04222	-2.66694	0.00765447	0.126758	0	0	0	16.2718	10.2234	15.772	6.26246	51.2662	0	25.8434	31.6927	33.4367	#DIV/0!	-Inf	-0.661154	-Inf	SMC3	chr10:112359571:+	-
chr20:46364701-46364806:mpeak_49644|chr20_46287136_46415360_SULF2_NM_-|	547.414	-5.44083	1.40397	-3.87532	0.000106485	0.0123158	0	0	0	4.78581	0	8.83233	1251.24	1131.9	1827.41	720.743	621.586	1002.47	#DIV/0!	-Inf	0.844547	-Inf	SULF2	-	-
chr3:182634414-182634665:mpeak_57517|chr3_182511290_182635810_ATP11B_NM_+|	34.9595	-5.41958	1.36868	-3.95972	7.50375e-05	0.0113225	0	0	0	10.5288	6.13407	8.20145	96.4418	66.1064	39.3669	71.7872	65.4301	55.5175	#DIV/0!	-Inf	0.0671327	-Inf	ATP11B	chr3:182634609:+;chr3:182634707:+	chr3_182916820_+
chr4:106390695-106390799:mpeak_60445|chr4_106290910_106395227_PPA2_NM_-|	323.493	-5.41267	1.33601	-4.05137	5.09193e-05	0.010091	0	0	0	2.87149	11.2458	5.67792	529.804	801.372	873.946	431.68	629.764	595.551	#DIV/0!	-Inf	0.412288	-Inf	PPA2	chr4:106390696:-;chr4:106390726:-;chr4:106390788:-	chr4_105469539_-
chr6:30708291-30708377:mpeak_67446|chr6_30695922_30710453_FLOT1_NM_-|	315.041	-5.40459	1.39573	-3.87224	0.000107841	0.0123158	0	0	0	10.5288	0	10.0941	638.77	528.851	885.756	569.512	578.647	558.329	#DIV/0!	-Inf	0.266969	-Inf	FLOT1	chr6:30708272:-	chr6_30740550_-
chr7:80455101-80455162:mpeak_72762|chr7_80374623_80548667_SEMA3C_NM_-|	605.974	-5.39568	1.45573	-3.7065	0.000210145	0.0187282	0	0	0	3.82865	14.3128	1.26176	1325.14	1944.07	947.169	971.52	998.831	1065.56	#DIV/0!	-Inf	0.473874	-Inf	SEMA3C	chr7:80455107:-	chr7_80825794_-
chr10:3183601-3183662:mpeak_8475|chr10_3180316_3215033_PITRM1_NM_-|	216.817	-5.37613	1.36029	-3.9522	7.74373e-05	0.0113225	0	0	0	1.91433	1.02234	7.57057	521.036	509.964	736.162	261.305	255.586	307.239	#DIV/0!	-Inf	1.10049	-Inf	PITRM1	chr10:3183607:-	chr10_3141426_-
chr20:31435695-31435749:mpeak_48977|chr20_31407698_31436477_MAPRE1_NM_+|	105.803	-5.36674	1.50477	-3.56648	0.000361807	0.0239005	0	0	0	11.486	0	8.20145	136.522	362.911	195.26	168.461	174.821	211.976	#DIV/0!	-Inf	0.323217	-Inf	MAPRE1	-	-
chr12:76477623-76477674:mpeak_19095|chr12_76442244_76478813_NAP1L1_NM_-|	728.615	-5.34301	1.34724	-3.96588	7.31246e-05	0.0113225	0	0	0	17.2289	3.06703	7.57057	1129.75	1736.3	1232.97	1266.33	1610.19	1739.97	#DIV/0!	-Inf	-0.171515	-Inf	NAP1L1	-	-
chr16:14669920-14669998:mpeak_29794|chr16_14530629_14724128_PARN_NM_-|	82.1983	-5.3247	1.39279	-3.82303	0.00013182	0.0141382	0	0	0	1.91433	6.13407	6.93969	112.724	249.585	233.052	96.6734	129.838	149.519	#DIV/0!	-Inf	0.66292	-Inf	PARN	chr16:14669932:-	chr16_14576063_-
chr7:151801820-151801978:mpeak_74554|chr7_151722758_151818630_GALNT11_NM_+|	51.9387	-5.31199	1.36291	-3.89753	9.71772e-05	0.0120007	0	0	0	8.61446	15.3352	11.3558	45.0897	113.325	81.0959	92.8448	107.346	148.257	#DIV/0!	-Inf	-0.540852	-Inf	GALNT11	chr7:151801869:+;chr7:151801966:+	chr7_152104782_+;chr7_152104880_+
chr14:104204486-104204553:mpeak_26090|chr14_104201532_104313927_PPP1R13B_NM_-|	8.04472	-5.30497	1.72148	-3.08163	0.00205873	0.0613793	0	0	0	2.87149	15.3352	1.89264	11.2724	21.5858	9.44807	8.61446	12.2681	13.2485	#DIV/0!	-Inf	0.309784	-Inf	PPP1R13B	chr14:104204483:-	chr14_103738149_-
chr19:53158705-53158757:mpeak_41427|chr19_53118050_53193834_ZNF83_NM_-|	9.04174	-5.26645	2.5058	-2.1017	0.0355794	0.279186	0	0	0	7.6573	16.3575	0	0	36.426	5.51137	9.57163	23.5139	9.46321	#DIV/0!	-Inf	-0.0208814	-Inf	ZNF83	chr19:53158706:-	-
chr10:16858660-16858716:mpeak_8897|chr10_16635495_16859453_RSU1_NM_-|	81.9609	-5.26535	1.46573	-3.59232	0.000327753	0.022767	0	0	0	5.74298	0	10.725	122.744	244.189	186.599	158.889	141.084	113.558	#DIV/0!	-Inf	0.420672	-Inf	RSU1	chr10:16858658:-	chr10_16816661_-
chr11:64000464-64000520:mpeak_14028|chr11_63997752_64001365_DNAJC4_NM_+|	17.5687	-5.25637	1.47379	-3.56657	0.000361681	0.0239005	0	0	0	11.486	3.06703	4.41616	32.5648	36.426	37.0049	15.3146	40.8938	29.6514	#DIV/0!	-Inf	0.303951	-Inf	DNAJC4	chr11:64000518:+	chr11_64233042_+
chr8:87520208-87520264:mpeak_76537|chr8_87486587_87521009_RMDN1_NM_-|	132.425	-5.25294	1.3223	-3.97259	7.10956e-05	0.0113225	0	0	0	3.82865	4.08938	10.725	279.306	225.301	340.918	230.676	270.921	223.332	#DIV/0!	-Inf	0.222007	-Inf	RMDN1	chr8:87520213:-	-
chr3:149374011-149374073:mpeak_56702|chr3_149238776_149421060_WWTR1_NM_-|	60.4564	-5.2316	1.3536	-3.86494	0.000111116	0.0124784	0	0	0	5.74298	6.13407	5.04704	146.541	103.881	158.255	90.9304	69.5194	139.425	#DIV/0!	-Inf	0.446606	-Inf	WWTR1	chr3:149374018:-	chr3_149656235_-
chr3:12878623-12878715:mpeak_53207|chr3_12877722_12883081_RPL32_NM_-|	4712.15	-5.19549	1.26431	-4.10934	3.96799e-05	0.00862462	0	0	0	6.70014	5.11172	8.20145	8584.57	9638.04	11144.8	8870.98	9345.25	8942.1	#DIV/0!	-Inf	0.11282	-Inf	RPL32	-	-
chr9:132568651-132568807:mpeak_81060|chr9_132565431_132571620_TOR1B_NM_+|	44.7373	-5.18347	1.63161	-3.17691	0.00148853	0.0494076	0	0	0	10.5288	11.2458	0	70.1395	64.7573	128.336	71.7872	79.7429	100.31	#DIV/0!	-Inf	0.0638326	-Inf	TOR1B	chr9:132568718:+	chr9_129806436_+
chr7:158529923-158529992:mpeak_74754|chr7_158526943_158622319_ESYT2_NM_-|	192.884	-5.16212	1.30236	-3.96366	7.38107e-05	0.0113225	0	0	0	5.74298	7.15641	5.67792	298.093	460.047	485.001	308.206	368.044	376.636	#DIV/0!	-Inf	0.23964	-Inf	ESYT2	chr7:158529901:-;chr7:158529929:-	chr7_158737238_-;chr7_158737266_-
chr10:94675731-94675797:mpeak_10863|chr10_94594469_94817979_EXOC6_NM_+|	26.2563	-5.151	1.38022	-3.73203	0.000189945	0.0186041	0	0	0	3.82865	6.13407	8.83233	51.3521	48.568	55.9011	38.2865	67.4747	34.6984	#DIV/0!	-Inf	0.149735	-Inf	EXOC6	chr10:94675785:+	chr10_92916030_+
chr4:123833697-123833781:mpeak_60823|chr4_123814380_123844159_NUDT6_NM_-|	5.71799	-5.14472	1.78831	-2.87686	0.00401652	0.0875835	0	0	0	3.82865	14.3128	10.725	1.25249	9.44377	6.29871	11.486	3.06703	8.20145	#DIV/0!	-Inf	-0.421039	-Inf	NUDT6	chr4:123833700:-	-
chr5:145864909-145864961:mpeak_65491|chr5_145826872_145890003_TCERG1_NM_+|	28.773	-5.12513	1.86256	-2.75166	0.00592944	0.10798	0	0	0	0	0	10.0941	30.0598	106.58	85.0326	39.2437	35.7821	38.4837	#DIV/0!	-Inf	0.965615	-Inf	TCERG1	chr5:145864964:+	chr5_146485396_+
chr5:179326178-179326254:mpeak_66399|chr5_179291128_179334856_TBC1D9B_NM_-|	206.412	-5.08367	1.41459	-3.59374	0.000325964	0.022767	0	0	0	10.5288	0	2.52352	420.837	504.567	593.653	330.221	349.642	264.97	#DIV/0!	-Inf	0.685046	-Inf	TBC1D9B	-	-
chr5:131953851-131953989:mpeak_64723|chr5_131892615_131977869_RAD50_NM_+|	17.7597	-5.0563	1.65354	-3.05786	0.00222925	0.0636804	0	0	0	10.5288	8.17876	13.2485	12.5249	52.6153	5.51137	29.672	26.581	54.2557	#DIV/0!	-Inf	-0.645366	-Inf	RAD50	-	chr5_132618209_+
chr13:94286879-94286959:mpeak_22629|chr13_93879077_95055268_GPC6_NM_+|	30.0797	-5.05483	1.58306	-3.19307	0.00140771	0.0481853	0	0	0	9.57163	0	3.78528	81.4119	90.3904	37.7923	36.3722	34.7597	66.8733	#DIV/0!	-Inf	0.602879	-Inf	GPC6	-	-
chr17:49357409-49357469:mpeak_35232|chr17_49337896_49375142_UTP18_NM_+|	51.1819	-5.03838	1.42254	-3.54182	0.000397371	0.0247916	0	0	0	5.74298	5.11172	3.78528	80.1594	198.319	70.0732	94.7591	81.7876	74.4439	#DIV/0!	-Inf	0.47374	-Inf	UTP18	-	-
chr14:104303977-104304121:mpeak_26097|chr14_104201532_104313927_PPP1R13B_NM_-|	7.69134	-5.03426	1.74106	-2.89149	0.00383421	0.0847046	0	0	0	7.6573	0	8.20145	11.2724	21.5858	9.44807	8.61446	12.2681	13.2485	#DIV/0!	-Inf	0.309784	-Inf	PPP1R13B	-	-
chr7:66456045-66456101:mpeak_72401|chr7_66453486_66460588_SBDS_NM_-|	119.871	-5.02367	1.53517	-3.27239	0.00106644	0.0408276	0	0	0	0.957163	3.06703	14.5103	320.638	250.935	141.721	286.192	160.508	259.923	#DIV/0!	-Inf	0.0135557	-Inf	SBDS	chr7:66456046:-	chr7_66991060_-
chr15:42741857-42741907:mpeak_26691|chr15_42709558_42783395_ZNF106_NM_-|	61.2711	-5.01846	1.71009	-2.93462	0.00333957	0.0773503	0	0	0	1.91433	15.3352	0	117.734	148.402	123.612	107.202	139.039	82.0145	#DIV/0!	-Inf	0.247724	-Inf	ZNF106	chr15:42741858:-	chr15_42449662_-
chr14:35476469-35476600:mpeak_23641|chr14_35452103_35498266_SRP54_NM_+|	170.268	-5.01398	1.45139	-3.45462	0.000551079	0.0300942	0	0	0	11.486	1.02234	3.1544	249.246	562.579	323.596	234.505	338.396	319.226	#DIV/0!	-Inf	0.347907	-Inf	SRP54	-	-
chr19:3364845-3364897:mpeak_38599|chr19_3359560_3462749_NFIC_NM_+|	278.374	-5.01021	1.35312	-3.7027	0.000213314	0.0187282	0	0	0	8.61446	0	10.0941	578.651	528.851	546.413	636.513	477.435	553.913	#DIV/0!	-Inf	-0.0121138	-Inf	NFIC	chr19:3364896:+	chr19_3364897_+
chr6:125616806-125616865:mpeak_69663|chr6_125597389_125623282_HDDC2_NM_-|	83.1936	-5.00471	1.40843	-3.55339	0.0003803	0.0244044	0	0	0	7.6573	3.06703	10.725	106.462	245.538	106.291	148.36	151.307	218.916	#DIV/0!	-Inf	-0.178312	-Inf	HDDC2	-	-
chr19:53157458-53157586:mpeak_41424|chr19_53118050_53193834_ZNF83_NM_-|	8.701	-5.00008	2.05388	-2.43445	0.0149144	0.175546	0	0	0	6.70014	8.17876	5.04704	0	36.426	5.51137	9.57163	23.5139	9.46321	#DIV/0!	-Inf	-0.0208814	-Inf	ZNF83	-	-
chr5:169014330-169014382:mpeak_65919|chr5_169010637_169031063_SPDL1_NM_+|	18.1377	-4.99799	1.69903	-2.94167	0.00326446	0.0769988	0	0	0	10.5288	15.3352	9.46321	6.26246	47.2189	11.8101	11.486	44.9832	60.5645	#DIV/0!	-Inf	-0.841958	-Inf	SPDL1	-	-
chr5:148883184-148883234:mpeak_65538|chr5_148876423_148931115_CSNK1A1_NM_-|	99.6935	-4.98962	1.45186	-3.43671	0.000588818	0.0309957	0	0	0	0	11.2458	10.725	146.541	175.384	222.03	190.475	185.044	254.876	#DIV/0!	-Inf	-0.212769	-Inf	CSNK1A1	chr5:148883183:-	chr5_149503621_-
chr21:30435665-30435750:mpeak_50629|chr21_30428873_30446118_CCT8_NM_-|	444.997	-4.98524	1.3775	-3.61904	0.000295701	0.0216569	0	0	0	9.57163	0	3.78528	916.824	1270.86	955.042	595.355	894.552	693.969	#DIV/0!	-Inf	0.525127	-Inf	CCT8	-	-
chr19:16320014-16320067:mpeak_39523|chr19_16308664_16345223_AP1M1_NM_+|	149.463	-4.96178	1.36011	-3.64808	0.000264209	0.0207005	0	0	0	5.74298	4.08938	4.41616	270.538	259.029	485.788	267.048	310.793	186.11	#DIV/0!	-Inf	0.410433	-Inf	AP1M1	chr19:16320065:+	chr19_16209254_+
chr4:41015238-41015392:mpeak_59200|chr4_40818276_41216635_APBB2_NM_-|	73.1326	-4.95608	1.3974	-3.54664	0.00039018	0.0245704	0	0	0	2.87149	5.11172	14.5103	164.076	84.994	129.911	148.36	165.62	162.136	#DIV/0!	-Inf	-0.329188	-Inf	APBB2	chr4:41015340:-	-
chr16:11852282-11852353:mpeak_29689|chr16_11845362_11891114_ZC3H7A_NM_-|	44.0739	-4.95229	1.58678	-3.12097	0.00180258	0.0564921	0	0	0	4.78581	0	12.6176	46.3422	120.071	92.906	64.1299	102.234	85.7997	#DIV/0!	-Inf	0.0403648	-Inf	ZC3H7A	-	-
chrX:41197018-41197120:mpeak_82167|chrX_41192560_41223526_DDX3X_NR_+mpeak_82167|chrX_41192560_41206892_DDX3X_NM_+||	274.225	-4.95217	1.3346	-3.71061	0.000206764	0.0187282	0	0	0	1.91433	9.2011	2.52352	635.013	779.786	531.454	469.967	453.921	406.918	#DIV/0!	-Inf	0.548399	-Inf	DDX3X	chrX:41197068:+;chrX:41197118:+	chrX_41337831_+;chrX_41337875_+
chr16:75118740-75118811:mpeak_31796|chr16_75032914_75141630_ZNRF1_NM_+mpeak_31796|chr16_75032914_75141630_ZNRF1_NM_+||	314.988	-4.9503	1.50455	-3.29022	0.0010011	0.0395904	0	0	0	7.6573	13.2905	0	582.408	658.366	581.843	648.956	674.747	612.585	#DIV/0!	-Inf	-0.0872821	-Inf	ZNRF1	-	chr16_75084902_+
chr1:32604803-32604861:mpeak_1468|chr1_32573643_32636307_KPNA6_NM_+|	212.306	-4.92783	1.35423	-3.63884	0.00027387	0.0207341	0	0	0	3.82865	0	6.93969	489.724	414.177	640.106	331.178	312.837	348.877	#DIV/0!	-Inf	0.63697	-Inf	KPNA6	-	-
chr4:147104058-147104138:mpeak_61219|chr4_147096834_147110773_LSM6_NM_+|	45.6735	-4.92675	1.37971	-3.57087	0.0003558	0.0239005	0	0	0	7.6573	5.11172	8.20145	80.1594	118.722	47.2403	77.5302	84.8546	118.606	#DIV/0!	-Inf	-0.19115	-Inf	LSM6	-	-
chr6:13588686-13588744:mpeak_66822|chr6_13574760_13612021_SIRT5_NM_+|	35.6633	-4.91507	1.44227	-3.40787	0.000654727	0.0324379	0	0	0	6.70014	0	5.04704	56.3621	101.183	92.906	42.1152	59.296	64.3498	#DIV/0!	-Inf	0.595426	-Inf	SIRT5	chr6:13588740:+	-
chr2:42511204-42511254:mpeak_43074|chr2_42396477_42556873_EML4_NM_+|	115.407	-4.91253	1.75206	-2.80386	0.00504942	0.0983323	0	0	0	0	0	11.3558	142.784	391.242	288.166	163.675	173.799	213.868	#DIV/0!	-Inf	0.576528	-Inf	EML4	-	chr2_42284139_+
chr13:100774506-100774565:mpeak_22804|chr13_100741268_101182351_PCCA_NM_+|	10.112	-4.89099	1.57778	-3.09992	0.00193573	0.0584886	0	0	0	0.957163	6.13407	6.3088	26.3023	24.284	11.0227	21.0576	13.2905	11.9867	#DIV/0!	-Inf	0.411046	-Inf	PCCA	-	-
chr15:63336488-63336551:mpeak_27607|chr15_63334837_63363288_TPM1_NM_+|	299.538	-4.8895	1.34221	-3.64287	0.000269617	0.0207341	0	0	0	0.957163	5.11172	11.3558	603.701	542.342	607.038	609.713	671.68	542.557	#DIV/0!	-Inf	-0.0571734	-Inf	TPM1	chr15:63336541:+	chr15_63044341_+
chr15:44599990-44600043:mpeak_26844|chr15_44580908_44705533_CASC4_NM_+|	75.8999	-4.85885	1.59177	-3.05249	0.00226951	0.0637164	0	0	0	2.87149	14.3128	0.63088	100.199	214.509	139.359	96.6734	173.799	168.445	#DIV/0!	-Inf	0.0489561	-Inf	CASC4	-	-
chr9:79985934-79986069:mpeak_79231|chr9_79792360_80030871_VPS13A_NM_+|	16.4506	-4.84131	2.00614	-2.41325	0.015811	0.181799	0	0	0	0	11.2458	8.20145	22.5448	59.3609	2.36202	34.4579	24.5363	34.6984	#DIV/0!	-Inf	-0.152954	-Inf	VPS13A	-	chr9_77371031_+
chr7:142995741-142995791:mpeak_74330|chr7_142985307_143002032_CASP2_NM_+|	168.304	-4.83697	1.42581	-3.39244	0.00069273	0.0335201	0	0	0	6.70014	0	5.67792	253.003	352.118	547.2	214.404	354.754	285.789	#DIV/0!	-Inf	0.430637	-Inf	CASP2	-	-
chr12:1879520-1879610:mpeak_16237|chr12_1800246_1895109_ADIPOR2_NM_+|	690.751	-4.83394	1.4011	-3.4501	0.000560371	0.0302062	0	0	0	0	10.2234	12.6176	1311.36	1002.39	1188.88	1674.08	1519.2	1570.26	#DIV/0!	-Inf	-0.443597	-Inf	ADIPOR2	chr12:1879588:+	chr12_1770406_+;chr12_1770440_+
chr4:128813622-128813673:mpeak_60885|chr4_128802015_128819593_PLK4_NM_+|	6.8645	-4.82703	2.0187	-2.39116	0.0167952	0.187051	0	0	0	10.5288	2.04469	5.67792	1.25249	26.9822	3.14936	4.78581	15.3352	12.6176	#DIV/0!	-Inf	-0.0609606	-Inf	PLK4	-	-
chr5:153667907-153667973:mpeak_65675|chr5_153570294_153796373_GALNT10_NM_+|	83.8475	-4.80894	1.30514	-3.68461	0.000229054	0.0194116	0	0	0	6.70014	3.06703	3.1544	206.661	186.177	177.939	135.917	150.285	136.27	#DIV/0!	-Inf	0.434071	-Inf	GALNT10	chr5:153667966:+	-
chr4:2481358-2481415:mpeak_58404|chr4_2470794_2515396_RNF4_NM_+|	25.7269	-4.80787	1.53345	-3.13533	0.00171658	0.05547	0	0	0	10.5288	3.06703	10.725	33.8173	64.7573	18.1088	28.7149	66.4524	72.5513	#DIV/0!	-Inf	-0.523443	-Inf	RNF4	chr4:2481412:+	-
chr22:19430272-19430325:mpeak_51552|chr22_19429217_19435755_C22orf39_NM_-|	50.0105	-4.80171	2.03685	-2.35743	0.0184021	0.197317	0	0	0	21.0576	0	0	107.714	83.6448	68.4985	87.1018	105.301	126.807	#DIV/0!	-Inf	-0.296786	-Inf	C22orf39	-	-
chr12:46243571-46243645:mpeak_17454|chr12_46123619_46298716_ARID2_NM_+|	25.3635	-4.79847	1.55328	-3.08925	0.00200661	0.0602742	0	0	0	0.957163	2.04469	8.20145	63.877	79.5975	28.3442	29.672	44.9832	46.6852	#DIV/0!	-Inf	0.501828	-Inf	ARID2	chr12:46243622:+	-
chr20:60763988-60764047:mpeak_50247|chr20_60758080_60775738_MTG2_NM_+|	10.7191	-4.79472	1.41466	-3.3893	0.000700706	0.0335201	0	0	0	3.82865	5.11172	5.04704	25.0498	20.2367	17.3215	17.2289	18.4022	16.4029	#DIV/0!	-Inf	0.26689	-Inf	MTG2	chr20:60764048:+	chr20_62188982_+
chr16:11030694-11030747:mpeak_29644|chr16_11023416_11036257_DEXI_NM_-|	141.714	-4.78754	1.60454	-2.98375	0.00284739	0.0721267	0	0	0	3.82865	15.3352	0	284.315	300.852	218.093	334.05	300.569	243.52	#DIV/0!	-Inf	-0.128582	-Inf	DEXI	chr16:11030696:-	chr16_10936840_-
chr3:119623608-119623666:mpeak_55629|chr3_119545702_119813264_GSK3B_NM_-|	47.6108	-4.78651	1.41416	-3.38469	0.000712579	0.0335201	0	0	0	5.74298	5.11172	2.52352	147.794	113.325	54.3264	85.1875	87.9216	69.3969	#DIV/0!	-Inf	0.379371	-Inf	GSK3B	chr3:119623609:-	-
chr12:132199033-132199095:mpeak_21063|chr12_132195631_132283967_SFSWAP_NM_+|	13.4879	-4.77515	1.58364	-3.0153	0.00256724	0.0681199	0	0	0	7.6573	1.02234	3.78528	12.5249	48.568	24.4075	20.1004	20.4469	23.3426	#DIV/0!	-Inf	0.420343	-Inf	SFSWAP	chr12:132199094:+	chr12_131714547_+
chrX:134027305-134027358:mpeak_83690|chrX_134023222_134049374_MOSPD1_NM_-|	31.1604	-4.76896	1.47072	-3.24261	0.00118441	0.0440163	0	0	0	2.87149	18.4022	5.04704	50.0996	37.7751	48.0277	67.9585	92.011	51.7322	#DIV/0!	-Inf	-0.639462	-Inf	MOSPD1	chrX:134027304:-	chrX_134893255_-;chrX_134893324_-
chr11:72788611-72788665:mpeak_14728|chr11_72549919_72853143_FCHSD2_NM_-|	5.38981	-4.75977	1.8325	-2.59743	0.00939254	0.139734	0	0	0	0.957163	11.2458	2.52352	3.75747	13.4911	9.44807	7.6573	6.13407	9.46321	#DIV/0!	-Inf	0.199144	-Inf	FCHSD2	chr11:72788614:-	chr11_73077570_-
chr2:9350054-9350104:mpeak_42032|chr2_9346893_9543381_ASAP2_NM_+|	31.9772	-4.75481	1.58696	-2.99618	0.00273383	0.0708484	0	0	0	0	3.06703	8.20145	36.3222	116.023	62.9871	44.9866	57.2513	54.8866	#DIV/0!	-Inf	0.45466	-Inf	ASAP2	chr2:9350105:+	chr2_9209975_+
chr4:2256139-2256191:mpeak_58393|chr4_2252428_2263739_MXD4_NM_-|	210.632	-4.75159	1.36549	-3.47978	0.000501826	0.0287575	0	0	0	4.78581	1.02234	6.93969	355.707	360.212	658.215	387.651	361.91	391.146	#DIV/0!	-Inf	0.268596	-Inf	MXD4	chr4:2256140:-;chr4:2256167:-	chr4_2254414_-;chr4_2254458_-
chr15:78878981-78879037:mpeak_28348|chr15_78857861_78885433_CHRNA5_NM_+|	20.6023	-4.74595	1.46053	-3.24948	0.00115616	0.0432788	0	0	0	6.70014	0	5.67792	52.6046	45.8698	33.0682	30.6292	39.8714	32.8058	#DIV/0!	-Inf	0.3486	-Inf	CHRNA5	-	chr15_78586650_+
chr13:21429854-21429910:mpeak_21338|chr13_21358058_21476913_XPO4_NM_-|	38.2914	-4.72428	1.40982	-3.35097	0.000805283	0.0350672	0	0	0	6.70014	3.06703	3.78528	45.0897	113.325	84.2453	53.6011	82.8099	66.8733	#DIV/0!	-Inf	0.255438	-Inf	XPO4	-	-
chr19:8385313-8385382:mpeak_38937|chr19_8376479_8386280_NDUFA7_NM_-|	199.395	-4.723	1.3003	-3.63224	0.000280972	0.0210354	0	0	0	1.91433	6.13407	5.04704	392.03	453.301	457.444	328.307	416.094	332.474	#DIV/0!	-Inf	0.274737	-Inf	NDUFA7	chr19:8385331:-	chr19_8320448_-
chr19:34922868-34922973:mpeak_40180|chr19_34919267_34959944_UBA2_NM_+|	270.27	-4.70375	1.40303	-3.35256	0.000800676	0.0350672	0	0	0	2.87149	0	8.20145	453.402	715.028	650.342	445.081	571.491	396.824	#DIV/0!	-Inf	0.3638	-Inf	UBA2	chr19:34922967:+	chr19_34432061_+
chr5:171521978-171522030:mpeak_65974|chr5_171472026_171615346_STK10_NM_-|	12.5587	-4.69092	1.71702	-2.73201	0.00629494	0.111674	0	0	0	10.5288	0	2.52352	20.0399	39.1242	16.5341	22.0147	15.3352	24.6043	#DIV/0!	-Inf	0.289055	-Inf	STK10	chr5:171521975:-	-
chr3:123331354-123331496:mpeak_55848|chr3_123304359_123349342_MYLK-AS1_NR_+|	7.29894	-4.69054	1.91509	-2.44925	0.0143152	0.172149	0	0	0	5.74298	4.08938	10.0941	2.50498	1.34911	25.1948	8.61446	17.3799	12.6176	#DIV/0!	-Inf	-0.410561	-Inf	MYLK-AS1	chr3:123331410:+;chr3:123331440:+	chr3_123612582_+
chr14:102233178-102233250:mpeak_25885|chr14_102228134_102391477_PPP2R5C_NM_+|	88.2055	-4.65901	1.36899	-3.40324	0.00066592	0.0327516	0	0	0	14.3574	1.02234	8.20145	123.997	149.751	131.486	183.775	226.961	218.916	#DIV/0!	-Inf	-0.6358	-Inf	PPP2R5C	chr14:102233233:+	chr14_101766894_+
chr4:17499973-17500024:mpeak_58753|chr4_17488859_17513857_QDPR_NM_-|	281.118	-4.64384	1.33682	-3.4738	0.00051315	0.0290555	0	0	0	2.87149	2.04469	7.57057	507.259	580.117	688.134	563.769	618.518	403.133	#DIV/0!	-Inf	0.163369	-Inf	QDPR	chr4:17499960:-	-
chr20:5948082-5948244:mpeak_48501|chr20_5931297_5974944_MCM8_NM_+|	49.6367	-4.63578	1.44105	-3.21695	0.0012956	0.046189	0	0	0	11.486	9.2011	6.93969	107.714	71.5028	23.6202	128.26	106.324	130.592	#DIV/0!	-Inf	-0.848269	-Inf	MCM8	-	-
chr22:20305551-20305693:mpeak_51624|chr22_20302347_20307628_DGCR6L_NM_-|	29.6511	-4.63072	1.39808	-3.3122	0.000925661	0.0383433	0	0	0	4.78581	6.13407	4.41616	55.1096	82.2957	33.0682	46.901	56.229	66.8733	#DIV/0!	-Inf	0.00398574	-Inf	DGCR6L	chr22:20305550:-	chr22_20318012_-;chr22_20318054_-;chr22_20318120_-
chr20:56275008-56275136:mpeak_50091|chr20_56227654_56286592_PMEPA1_NM_-|	788.754	-4.60592	1.35083	-3.40969	0.000650376	0.0324379	0	0	0	3.82865	1.02234	10.725	1549.33	1250.63	1592.79	1565.92	1507.96	1982.86	#DIV/0!	-Inf	-0.203084	-Inf	PMEPA1	-	-
chr6:170871526-170871585:mpeak_70783|chr6_170863420_170881273_TBP_NM_+|	19.6564	-4.60488	1.48349	-3.10409	0.00190862	0.0579293	0	0	0	7.6573	5.11172	3.78528	16.2824	41.8224	45.6657	36.3722	55.2066	23.9735	#DIV/0!	-Inf	-0.15515	-Inf	TBP	chr6:170871578:+	chr6_170562495_+
chr3:149374657-149374709:mpeak_56704|chr3_149238776_149421060_WWTR1_NM_-|	59.8618	-4.60434	1.56977	-2.93313	0.00335567	0.0774332	0	0	0	0.957163	0	8.83233	146.541	103.881	158.255	90.9304	69.5194	139.425	#DIV/0!	-Inf	0.446606	-Inf	WWTR1	-	-
chr11:74701090-74701202:mpeak_14850|chr11_74699949_74716457_NEU3_NM_+|	4.3114	-4.59583	2.05179	-2.23991	0.0250969	0.230072	0	0	0	5.74298	10.2234	1.26176	11.2724	0	4.72403	6.70014	6.13407	5.67792	#DIV/0!	-Inf	-0.210719	-Inf	NEU3	chr11:74701143:+	chr11_74990111_+
chr15:44674432-44674490:mpeak_26849|chr15_44580908_44705533_CASC4_NM_+|	75.6607	-4.58913	1.56384	-2.93452	0.0033406	0.0773503	0	0	0	5.74298	9.2011	0	100.199	214.509	139.359	96.6734	173.799	168.445	#DIV/0!	-Inf	0.0489561	-Inf	CASC4	chr15:44674484:+	chr15_44382285_+
chr11:85438044-85438100:mpeak_15114|chr11_85406383_85522202_SYTL2_NM_-|	304.648	-4.58341	1.49137	-3.0733	0.00211708	0.0616277	0	0	0	8.61446	6.13407	0	705.153	787.88	371.624	584.826	523.44	668.102	#DIV/0!	-Inf	0.0699787	-Inf	SYTL2	-	-
chr19:1643744-1643795:mpeak_38496|chr19_1611848_1652328_TCF3_NM_-|	314.727	-4.54708	1.35798	-3.34841	0.000812776	0.0350672	0	0	0	2.87149	2.04469	9.46321	425.847	609.798	755.845	634.599	721.775	614.478	#DIV/0!	-Inf	-0.137659	-Inf	TCF3	chr19:1643742:-;chr19:1643767:-	chr19_1643745_-
chr6:43564201-43564329:mpeak_68180|chr6_43543877_43581396_POLH_NM_+|	44.9619	-4.54623	1.42063	-3.20015	0.00137358	0.0479544	0	0	0	5.74298	1.02234	7.57057	87.6744	51.2662	115.739	90.9304	73.6088	105.988	#DIV/0!	-Inf	-0.0870914	-Inf	POLH	-	-
chr9:131652604-131652657:mpeak_81015|chr9_131644390_131678374_LRRC8A_NM_+|	27.5812	-4.52026	1.59953	-2.826	0.00471337	0.0945199	0	0	0	0.957163	1.02234	9.46321	28.8073	86.3431	54.3264	45.9438	51.1172	52.994	#DIV/0!	-Inf	0.175596	-Inf	LRRC8A	-	-
chr5:79735744-79735803:mpeak_63635|chr5_79703831_79773037_ZFYVE16_NM_+|	18.1017	-4.51535	1.66523	-2.71155	0.00669702	0.115408	0	0	0	8.61446	4.08938	4.41616	11.2724	68.8046	10.2354	33.5007	46.0055	30.2823	#DIV/0!	-Inf	-0.28173	-Inf	ZFYVE16	-	-
chr13:42619399-42619528:mpeak_21974|chr13_42614171_42803234_DGKH_NM_+|	15.3637	-4.5145	1.69005	-2.67122	0.00755755	0.125735	0	0	0	7.6573	0	7.57057	16.2824	43.1715	20.4708	40.2008	14.3128	34.6984	#DIV/0!	-Inf	-0.158597	-Inf	DGKH	-	-
chr15:62277128-62277201:mpeak_27581|chr15_62146757_62352664_VPS13C_NM_-|	12.2122	-4.50939	1.80758	-2.49471	0.0126059	0.157878	0	0	0	1.91433	0	8.20145	23.7973	44.5206	8.66073	19.1433	24.5363	15.772	#DIV/0!	-Inf	0.372745	-Inf	VPS13C	-	-
chr1:6078938-6079019:mpeak_234|chr1_6052357_6158544_KCNAB2_NM_+|	9.57981	-4.49419	2.20111	-2.04179	0.0411727	0.305194	0	0	0	0	0	12.6176	21.2923	8.09466	22.8328	7.6573	15.3352	27.1279	#DIV/0!	-Inf	0.059202	-Inf	KCNAB2	chr1:6078986:+;chr1:6079023:+	chr1_6018925_+;chr1_6018960_+
chr4:88961511-88961571:mpeak_60101|chr4_88928798_88996609_PKD2_NM_+|	11.5076	-4.48823	1.87053	-2.39945	0.0164199	0.184396	0	0	0	0	8.17876	4.41616	31.3123	29.6804	4.72403	11.486	17.3799	30.9131	#DIV/0!	-Inf	0.136623	-Inf	PKD2	chr4:88961568:+	chr4_88040415_+
chr18:33774567-33774618:mpeak_37782|chr18_33767479_33848495_MOCOS_NM_+|	19.5306	-4.47161	1.49546	-2.99013	0.00278863	0.0711734	0	0	0	6.70014	4.08938	2.52352	56.3621	25.6331	30.7062	19.1433	50.0949	39.1146	#DIV/0!	-Inf	0.0567701	-Inf	MOCOS	chr18:33774619:+	chr18_36194655_+
chr20:45910689-45910739:mpeak_49574|chr20_45839542_45985633_ZMYND8_NM_-|	168.188	-4.46034	1.45872	-3.0577	0.00223042	0.0636804	0	0	0	0	3.06703	9.46321	269.286	446.556	279.505	269.92	324.083	416.381	#DIV/0!	-Inf	-0.0216334	-Inf	ZMYND8	chr20:45910687:-	chr20_47281945_-
chr8:6613726-6613779:mpeak_74829|chr8_6565877_6614683_AGPAT5_NM_+|	183.969	-4.44993	1.42395	-3.12506	0.00177767	0.0562343	0	0	0	0	8.17876	8.83233	330.658	402.035	212.581	379.994	361.91	503.443	#DIV/0!	-Inf	-0.397742	-Inf	AGPAT5	chr8:6613777:+	-
chr6:152400493-152400547:mpeak_70385|chr6_152011630_152419866_ESR1_NM_+|	259.261	-4.44969	1.34909	-3.29829	0.000972759	0.0395904	0	0	0	5.74298	0	5.67792	671.335	439.81	508.621	582.912	452.899	444.14	#DIV/0!	-Inf	0.130237	-Inf	ESR1	-	-
chr4:77909562-77909621:mpeak_59814|chr4_77870866_77955649_SEPT11_NM_+|	221.317	-4.43409	1.37976	-3.21368	0.00131047	0.0464733	0	0	0	7.6573	11.2458	2.52352	402.05	411.479	216.518	626.942	570.468	406.918	#DIV/0!	-Inf	-0.639259	-Inf	SEPT11	chr4:77909620:+	chr4_76988466_+
chr16:67075317-67075368:mpeak_31215|chr16_67063049_67132612_CBFB_NM_+|	183.477	-4.40382	1.37286	-3.20777	0.00133768	0.0471899	0	0	0	9.57163	0	4.41616	285.568	399.337	358.239	304.378	409.96	430.26	#DIV/0!	-Inf	-0.133903	-Inf	CBFB	-	-
chr12:22809989-22810039:mpeak_16945|chr12_22778075_22837815_ETNK1_NM_+|	67.7349	-4.39564	1.75673	-2.50217	0.0123434	0.157878	0	0	0	0	0	9.46321	81.4119	230.698	132.273	79.4445	153.352	126.176	#DIV/0!	-Inf	0.30793	-Inf	ETNK1	-	-
chr22:47130507-47130560:mpeak_52782|chr22_47083103_47134152_CERK_NM_-|	18.9685	-4.37684	1.58754	-2.75699	0.00583365	0.107104	0	0	0	0	2.04469	8.20145	47.5947	43.1715	25.1948	29.672	35.7821	35.9602	#DIV/0!	-Inf	0.193379	-Inf	CERK	chr22:47130509:-	chr22_46734613_-
chr8:38291255-38291366:mpeak_75582|chr8_38271322_38326352_FGFR1_NM_-|	17.3647	-4.37562	1.69337	-2.58397	0.00976694	0.141222	0	0	0	0	9.2011	5.67792	36.3222	41.8224	11.0227	40.2008	22.4916	41.6381	#DIV/0!	-Inf	-0.226573	-Inf	FGFR1	chr8:38291263:-;chr8:38291315:-	chr8_38433736_-
chr17:41152212-41152263:mpeak_34666|chr17_41150445_41154888_RPL27_NM_+|	1633.29	-4.36393	1.30648	-3.34022	0.000837114	0.0356992	0	0	0	1.91433	7.15641	4.41616	2697.87	3298.57	3476.1	2777.69	3464.73	3871.08	#DIV/0!	-Inf	-0.0944581	-Inf	RPL27	chr17:41152263:+	chr17_43000212_+;chr17_43000245_+
chr2:128480521-128480615:mpeak_45334|chr2_128464126_128568761_WDR33_NM_-|	4.04806	-4.35305	1.92748	-2.25842	0.0239196	0.225911	0	0	0	4.78581	4.08938	5.04704	3.75747	2.69822	9.44807	1.91433	14.3128	2.52352	#DIV/0!	-Inf	-0.237574	-Inf	WDR33	-	-
chr12:112303086-112303135:mpeak_20141|chr12_112280031_112330770_MAPKAPK5_NM_+|	29.6072	-4.35254	1.48681	-2.92743	0.00341774	0.078329	0	0	0	2.87149	0	8.83233	47.5947	58.0117	63.7744	48.8153	57.2513	68.1351	#DIV/0!	-Inf	-0.0404878	-Inf	MAPKAPK5	-	-
chr17:38375698-38375755:mpeak_34442|chr17_38375573_38434436_WIPF2_NM_+|	12.3412	-4.34032	1.63966	-2.64708	0.00811891	0.129022	0	0	0	3.82865	5.11172	10.725	21.2923	2.69822	24.4075	31.5864	19.4245	29.0205	#DIV/0!	-Inf	-0.725617	-Inf	WIPF2	-	-
chr10:6148248-6148304:mpeak_8575|chr10_6130948_6157415_RBM17_NM_+|	430.939	-4.33485	1.32234	-3.27816	0.00104487	0.0403079	0	0	0	0.957163	5.11172	8.83233	825.392	804.07	610.975	915.047	1065.28	935.596	#DIV/0!	-Inf	-0.380175	-Inf	RBM17	-	chr10_6106341_+
chr1:6257705-6257793:mpeak_249|chr1_6246876_6259679_RPL22_NM_-|	1016.54	-4.31319	1.3511	-3.19236	0.00141116	0.0481853	0	0	0	3.82865	0	8.20145	1692.12	2306.98	1793.56	1910.5	2051.85	2431.41	#DIV/0!	-Inf	-0.14244	-Inf	RPL22	chr1:6257731:-;chr1:6257781:-	chr1_6197708_-
chr13:30828929-30828979:mpeak_21649|chr13_30782875_30881624_KATNAL1_NM_-|	5.9728	-4.30866	1.83695	-2.34555	0.0189992	0.200037	0	0	0	7.6573	0	4.41616	8.76744	14.8402	6.29871	5.74298	8.17876	15.772	#DIV/0!	-Inf	0.0102934	-Inf	KATNAL1	-	-
chr7:32603743-32603799:mpeak_71699|chr7_32535037_32623403_AVL9_NM_+|	72.3086	-4.29738	1.37154	-3.13325	0.00172881	0.05547	0	0	0	1.91433	5.11172	6.93969	118.987	182.13	85.0326	148.36	169.709	149.519	#DIV/0!	-Inf	-0.27608	-Inf	AVL9	chr7:32603795:+	chr7_32564181_+;chr7_32564235_+
chr18:52586490-52586548:mpeak_38027|chr18_52571646_52626739_CCDC68_NM_-|	10.491	-4.26196	1.70257	-2.50325	0.012306	0.157878	0	0	0	15.3146	8.17876	3.1544	1.25249	14.8402	14.1721	24.8862	24.5363	19.5573	#DIV/0!	-Inf	-1.18853	-Inf	CCDC68	-	-
chr16:81093000-81093051:mpeak_31958|chr16_81087699_81110872_C16orf46_NM_-|	28.5194	-4.25946	1.43392	-2.97051	0.0029731	0.0736497	0	0	0	2.87149	16.3575	6.3088	33.8173	41.8224	25.1948	78.4873	57.2513	80.1218	#DIV/0!	-Inf	-1.09811	-Inf	C16orf46	chr16:81092997:-	chr16_81059395_-
chr13:76402784-76402834:mpeak_22522|chr13_76194569_76432056_LMO7_NM_+|	11.7286	-4.25217	1.95154	-2.17888	0.0293408	0.251366	0	0	0	0	0	9.46321	17.5349	21.5858	30.7062	27.7577	20.4469	13.2485	#DIV/0!	-Inf	0.184296	-Inf	LMO7	-	-
chr2:17902402-17902456:mpeak_42257|chr2_17846880_17935096_SMC6_NM_-|	12.0174	-4.23709	1.76636	-2.39876	0.0164505	0.184432	0	0	0	9.57163	2.04469	5.67792	25.0498	24.284	1.57468	25.8434	25.5586	24.6043	#DIV/0!	-Inf	-0.578214	-Inf	SMC6	-	-
chr8:95437774-95437824:mpeak_76727|chr8_95384615_95487343_RAD54B_NM_-|	4.13281	-4.22127	1.96338	-2.15	0.0315553	0.259609	0	0	0	3.82865	0	7.57057	6.26246	9.44377	3.14936	9.57163	4.08938	5.67792	#DIV/0!	-Inf	-0.0365161	-Inf	RAD54B	chr8:95437771:-	chr8_94425546_-
chr17:62530698-62530822:mpeak_36047|chr17_62503157_62533720_CEP95_NM_+|	9.69288	-4.22122	1.93756	-2.17862	0.0293596	0.251366	0	0	0	12.4431	0	7.57057	6.26246	21.5858	7.08605	6.70014	22.4916	32.1749	#DIV/0!	-Inf	-0.812811	-Inf	CEP95	-	chr17_64534624_+;chr17_64534667_+;chr17_64534703_+
chr5:32312857-32312919:mpeak_62357|chr5_32230453_32313114_MTMR12_NM_-|	49.9954	-4.21266	1.75096	-2.40591	0.016132	0.182908	0	0	0	14.3574	0	0.63088	111.472	60.71	81.8832	101.459	103.257	126.176	#DIV/0!	-Inf	-0.381164	-Inf	MTMR12	-	-
chr7:7836544-7836594:mpeak_71227|chr7_7680266_7916911_UMAD1_NM_+|	16.2765	-4.20878	1.86706	-2.25423	0.0241815	0.226782	0	0	0	3.82865	4.08938	5.04704	1.25249	66.1064	17.3215	19.1433	33.7374	44.7925	#DIV/0!	-Inf	-0.205935	-Inf	UMAD1	chr7:7836595:+	chr7_7796963_+
chr3:25786999-25787052:mpeak_53576|chr3_25761126_25831530_NGLY1_NM_-|	14.5281	-4.20287	1.68639	-2.49223	0.0126942	0.15869	0	0	0	0	3.06703	7.57057	25.0498	44.5206	12.5974	20.1004	28.6256	32.8058	#DIV/0!	-Inf	0.0112109	-Inf	NGLY1	-	chr3_25745495_-
chr2:17902197-17902311:mpeak_42256|chr2_17846880_17935096_SMC6_NM_-|	11.9739	-4.19876	1.70434	-2.46357	0.013756	0.16761	0	0	0	5.74298	4.08938	6.93969	25.0498	24.284	1.57468	25.8434	25.5586	24.6043	#DIV/0!	-Inf	-0.578214	-Inf	SMC6	-	-
chr10:11996898-11996966:mpeak_8699|chr10_11963306_12085169_UPF2_NM_-|	16.1623	-4.14505	1.93171	-2.14579	0.0318897	0.261403	0	0	0	3.82865	0	13.8794	15.0299	45.8698	4.72403	47.8581	33.7374	29.0205	#DIV/0!	-Inf	-0.753272	-Inf	UPF2	chr10:11996896:-	-
chr9:85670523-85670573:mpeak_79327|chr9_85597697_85678043_RASEF_NM_-|	51.8361	-4.11864	1.43135	-2.87745	0.00400908	0.0875835	0	0	0	1.91433	6.13407	5.04704	103.957	122.769	44.8783	109.117	86.8993	141.317	#DIV/0!	-Inf	-0.312668	-Inf	RASEF	-	-
chr12:50814560-50814621:mpeak_17798|chr12_50794591_50854917_LARP4_NR_+mpeak_17798|chr12_50794591_50869308_LARP4_NM_+||	197.856	-4.1155	1.3241	-3.10814	0.00188267	0.0576612	0	0	0	7.6573	4.08938	1.89264	385.767	402.035	275.569	432.638	424.273	440.355	#DIV/0!	-Inf	-0.286829	-Inf	LARP4	-	-
chr8:81557395-81557451:mpeak_76444|chr8_81553712_81787016_ZNF704_NM_-|	10.7116	-4.10471	1.75893	-2.33363	0.0196148	0.203958	0	0	0	14.3574	3.06703	1.26176	11.2724	5.39644	22.8328	25.8434	17.3799	27.1279	#DIV/0!	-Inf	-0.832659	-Inf	ZNF704	-	-
chr14:76151287-76151340:mpeak_25144|chr14_76127550_76420766_TTLL5_NM_+|	37.6265	-4.09896	1.45706	-2.81317	0.00490554	0.0972163	0	0	0	1.91433	6.13407	8.83233	32.5648	53.9644	75.5845	57.4298	126.771	88.3233	#DIV/0!	-Inf	-0.749376	-Inf	TTLL5	-	chr14_75684995_+
chr10:101430212-101430268:mpeak_11135|chr10_101419262_101464208_ENTPD7_NM_+|	72.6361	-4.08231	1.59446	-2.56031	0.0104579	0.144397	0	0	0	0.957163	0	10.725	85.1694	159.195	139.359	151.232	136.994	188.002	#DIV/0!	-Inf	-0.311587	-Inf	ENTPD7	-	-
chr10:89624579-89624716:mpeak_10681|chr10_89623194_89725043_PTEN_NM_+|	125.316	-4.07918	1.47415	-2.76715	0.00565487	0.105471	0	0	0	7.6573	0	11.3558	159.066	244.189	103.141	309.164	337.374	331.843	#DIV/0!	-Inf	-0.950127	-Inf	PTEN	-	-
chr12:118473506-118473590:mpeak_20417|chr12_118472163_118499979_WSB2_NM_-|	166.717	-4.05844	1.30112	-3.11919	0.00181349	0.0565709	0	0	0	4.78581	6.13407	3.78528	321.89	253.633	247.224	371.379	449.832	341.937	#DIV/0!	-Inf	-0.499513	-Inf	WSB2	chr12:118473503:-	chr12_118035678_-;chr12_118035701_-;chr12_118035737_-
chr16:22090292-22090415:mpeak_30132|chr16_22019455_22092016_C16orf52_NM_+|	13.8556	-4.04997	1.46541	-2.7637	0.00571497	0.10579	0	0	0	4.78581	5.11172	7.57057	25.0498	9.44377	18.8961	36.3722	38.8491	20.1882	#DIV/0!	-Inf	-0.83757	-Inf	C16orf52	chr16:22090351:+	chr16_22079029_+
chr15:99899814-99899868:mpeak_28909|chr15_99791566_99926234_LRRC28_NM_+|	9.98444	-4.04766	1.80953	-2.23686	0.0252954	0.230298	0	0	0	1.91433	0	9.46321	15.0299	24.284	10.2354	10.5288	22.4916	25.8661	#DIV/0!	-Inf	-0.249072	-Inf	LRRC28	chr15:99899866:+	chr15_99359659_+
chr15:52511959-52512026:mpeak_27257|chr15_52486251_52587995_MYO5C_NM_-|	44.8217	-4.0375	1.71336	-2.35648	0.0184491	0.197317	0	0	0	0	5.11172	9.46321	62.6246	126.816	19.6835	66.0442	133.927	114.189	#DIV/0!	-Inf	-0.587141	-Inf	MYO5C	-	-
chr15:40677072-40677122:mpeak_26500|chr15_40674921_40685393_KNSTRN_NM_+|	70.5568	-4.02051	1.43987	-2.79227	0.00523392	0.101049	0	0	0	4.78581	3.06703	6.3088	47.5947	164.591	124.4	118.688	177.888	199.358	#DIV/0!	-Inf	-0.559175	-Inf	KNSTRN	chr15:40677124:+	-
chr12:121002951-121003001:mpeak_20567|chr12_120972131_121014392_RNF10_NM_+|	507.274	-3.98675	1.30855	-3.04668	0.00231383	0.0640526	0	0	0	3.82865	3.06703	5.04704	732.707	944.377	984.961	930.362	1269.75	1213.18	#DIV/0!	-Inf	-0.358631	-Inf	RNF10	-	-
chr1:51968711-51968792:mpeak_2369|chr1_51822518_51984995_EPS15_NM_-|	55.5837	-3.98405	1.38151	-2.88384	0.00392853	0.0862229	0	0	0	0.957163	9.2011	3.78528	80.1594	106.58	84.2453	97.6306	143.128	141.317	#DIV/0!	-Inf	-0.49565	-Inf	EPS15	chr1:51968723:-	chr1_51503033_-
chr4:38692323-38692377:mpeak_58988|chr4_38665789_38698702_KLF3_NM_+|	5.46902	-3.98137	1.92319	-2.07019	0.0384348	0.293692	0	0	0	2.87149	9.2011	1.89264	13.7774	1.34911	6.29871	4.78581	7.15641	18.2955	#DIV/0!	-Inf	-0.497041	-Inf	KLF3	chr4:38692372:+	chr4_38690752_+
chr14:72005378-72005537:mpeak_24880|chr14_71996028_72205734_SIPA1L1_NM_+|	41.7745	-3.97838	1.60407	-2.48018	0.0131314	0.162946	0	0	0	0	1.02234	10.0941	52.6046	68.8046	94.4807	100.502	93.0334	80.7527	#DIV/0!	-Inf	-0.345396	-Inf	SIPA1L1	-	-
chr2:103244204-103244256:mpeak_44791|chr2_103236147_103324577_SLC9A2_NM_+|	61.9232	-3.94803	1.76205	-2.24058	0.025053	0.229982	0	0	0	0	0	10.0941	172.844	68.8046	96.0553	173.246	126.771	95.263	#DIV/0!	-Inf	-0.227117	-Inf	SLC9A2	-	chr2_102627795_+
chr12:76844626-76844759:mpeak_19118|chr12_76749801_76953589_OSBPL8_NM_-|	78.3698	-3.94349	1.70132	-2.31789	0.0204551	0.209174	0	0	0	16.2718	4.08938	0	107.714	125.467	61.4124	251.734	130.86	242.889	#DIV/0!	-Inf	-1.08624	-Inf	OSBPL8	-	-
chr4:40881013-40881079:mpeak_59193|chr4_40818276_41216635_APBB2_NM_-|	72.1519	-3.93944	1.70208	-2.31448	0.0206412	0.21041	0	0	0	0	0	10.725	164.076	84.994	129.911	148.36	165.62	162.136	#DIV/0!	-Inf	-0.329188	-Inf	APBB2	-	-
chr4:153451524-153451605:mpeak_61305|chr4_153244301_153456393_FBXW7_NM_-|	44.3771	-3.93852	1.60789	-2.4495	0.0143056	0.172149	0	0	0	0	2.04469	13.2485	60.1196	68.8046	59.0504	97.6306	136.994	94.6321	#DIV/0!	-Inf	-0.808676	-Inf	FBXW7	chr4:153451520:-	chr4_152530366_-
chr7:91862323-91862500:mpeak_72912|chr7_91830118_91875414_KRIT1_NM_-|	40.1191	-3.92649	1.59177	-2.46675	0.0136346	0.166733	0	0	0	5.74298	9.2011	4.41616	56.3621	86.3431	8.66073	77.5302	119.614	113.558	#DIV/0!	-Inf	-1.0375	-Inf	KRIT1	chr7:91862403:-	-
chr17:687186-687313:mpeak_32514|chr17_685512_694773_RNMTL1_NM_+|	21.7444	-3.91785	1.47066	-2.664	0.00772177	0.127012	0	0	0	1.91433	4.08938	5.67792	26.3023	25.6331	55.1137	66.0442	35.7821	40.3764	#DIV/0!	-Inf	-0.409675	-Inf	RNMTL1	chr17:687238:+;chr17:687307:+	chr17_783923_+;chr17_784010_+;chr17_784073_+
chr11:32997124-32997176:mpeak_13124|chr11_32914723_32997879_QSER1_NM_+|	18.1498	-3.91704	1.73517	-2.25743	0.023981	0.225968	0	0	0	0.957163	14.3128	3.1544	27.5548	5.39644	33.8556	50.7296	35.7821	46.0543	#DIV/0!	-Inf	-0.988643	-Inf	QSER1	chr11:32997176:+	chr11_32975604_+;chr11_32975629_+
chr17:15929970-15930022:mpeak_33330|chr17_15902693_15930687_TTC19_NM_+|	395.854	-3.91628	1.40626	-2.78489	0.00535456	0.101864	0	0	0	1.91433	11.2458	1.89264	594.933	430.366	833.792	953.334	965.093	957.677	#DIV/0!	-Inf	-0.629518	-Inf	TTC19	-	-
chr3:88144676-88144724:mpeak_55093|chr3_88105149_88199016_CGGBP1_NM_-|	106.993	-3.91388	1.39456	-2.80652	0.00500791	0.0978602	0	0	0	9.57163	4.08938	2.52352	209.166	164.591	95.268	309.164	207.536	282.004	#DIV/0!	-Inf	-0.767993	-Inf	CGGBP1	-	-
chr21:43428850-43428901:mpeak_51076|chr21_43414217_43430496_ZBTB21_NM_-|	8.41261	-3.90252	1.83324	-2.12875	0.0332747	0.268441	0	0	0	0	8.17876	7.57057	5.00996	17.5384	8.66073	14.3574	11.2458	28.3896	#DIV/0!	-Inf	-0.7908	-Inf	ZBTB21	-	-
chr3:125257289-125257393:mpeak_55906|chr3_125249424_125314381_OSBPL11_NM_-|	11.9963	-3.89697	1.55757	-2.50195	0.0123512	0.157878	0	0	0	6.70014	2.04469	3.78528	20.0399	9.44377	25.1948	40.2008	16.3575	20.1882	#DIV/0!	-Inf	-0.489128	-Inf	OSBPL11	-	-
chr6:38654660-38654713:mpeak_67980|chr6_38645159_38670952_GLO1_NM_-|	434.741	-3.87208	1.35675	-2.85393	0.00431827	0.0896378	0	0	0	4.78581	0	6.93969	850.442	787.88	504.684	1060.54	994.741	1006.89	#DIV/0!	-Inf	-0.514915	-Inf	GLO1	-	-
chr14:92469758-92469832:mpeak_25540|chr14_92436237_92506403_TRIP11_NM_-|	10.1694	-3.87074	1.78438	-2.16923	0.030065	0.253266	0	0	0	4.78581	3.06703	15.772	1.25249	17.5384	7.87339	22.9719	15.3352	33.4367	#DIV/0!	-Inf	-1.42794	-Inf	TRIP11	-	-
chr19:34712584-34712683:mpeak_40158|chr19_34663351_34718269_LSM14A_NM_+|	84.7223	-3.86461	1.48409	-2.60403	0.0092134	0.138881	0	0	0	1.91433	3.06703	10.0941	72.6445	205.065	80.3086	173.246	224.916	245.413	#DIV/0!	-Inf	-0.846076	-Inf	LSM14A	chr19:34712597:+;chr19:34712643:+;chr19:34712684:+	chr19_34221778_+
chr1:118425501-118425558:mpeak_4343|chr1_118413238_118472302_GDAP2_NM_-|	56.2833	-3.86341	1.49868	-2.57787	0.00994121	0.143128	0	0	0	0.957163	1.02234	10.725	78.9069	82.2957	96.0553	150.275	152.329	102.834	#DIV/0!	-Inf	-0.656263	-Inf	GDAP2	chr1:118425505:-	chr1_117882885_-
chr4:1936900-1936994:mpeak_58353|chr4_1873122_1980364_WHSC1_NM_+|	201.025	-3.85673	1.4543	-2.65194	0.00800303	0.128591	0	0	0	6.70014	1.02234	4.41616	185.369	554.484	260.609	332.135	497.882	569.685	#DIV/0!	-Inf	-0.484453	-Inf	WHSC1	-	chr4_1935174_+;chr4_1935226_+
chr13:67781997-67782127:mpeak_22455|chr13_66879160_67804468_PCDH9_NM_-|	6.09754	-3.84805	1.83115	-2.10144	0.0356027	0.279186	0	0	0	8.61446	5.11172	2.52352	5.00996	1.34911	13.3848	5.74298	11.2458	20.1882	#DIV/0!	-Inf	-0.913006	-Inf	PCDH9	-	chr13_67207958_-
chr8:133790116-133790169:mpeak_77790|chr8_133787603_133858025_PHF20L1_NM_+|	5.1143	-3.84399	1.76852	-2.17356	0.0297381	0.25268	0	0	0	11.486	5.11172	6.93969	0	5.39644	4.72403	5.74298	11.2458	10.725	#DIV/0!	-Inf	-1.45332	-Inf	PHF20L1	-	-
chr3:62304989-62305040:mpeak_54737|chr3_62304647_62318929_C3orf14_NM_+|	775.22	-3.83262	1.31746	-2.9091	0.00362471	0.0815751	0	0	0	6.70014	3.06703	3.78528	1228.69	1500.21	916.462	1715.24	2163.28	1765.2	#DIV/0!	-Inf	-0.630582	-Inf	C3orf14	-	-
chr2:37439005-37439194:mpeak_42938|chr2_37429046_37458740_CEBPZ_NM_-|	46.1095	-3.82866	1.53092	-2.5009	0.0123879	0.157878	0	0	0	9.57163	3.06703	6.93969	51.3521	97.1359	14.9594	114.86	113.48	141.948	#DIV/0!	-Inf	-1.17982	-Inf	CEBPZ	chr2:37438986:-	-
chr3:160239815-160239870:mpeak_57069|chr3_160219990_160283376_KPNA4_NM_-|	205.874	-3.82376	1.33583	-2.86246	0.00420364	0.0881495	0	0	0	8.61446	2.04469	2.52352	395.787	335.928	259.034	530.268	463.122	473.16	#DIV/0!	-Inf	-0.565834	-Inf	KPNA4	-	-
chr20:56886107-56886191:mpeak_50103|chr20_56884770_56934661_RAB22A_NM_+|	456.849	-3.77394	1.31519	-2.8695	0.00411121	0.0880578	0	0	0	2.87149	8.17876	5.67792	711.415	634.082	473.978	961.948	1238.06	1445.98	#DIV/0!	-Inf	-1.00279	-Inf	RAB22A	-	-
chr1:205600032-205600095:mpeak_7150|chr1_205585772_205602000_ELK4_NM_-|	71.3552	-3.76638	1.62495	-2.31784	0.020458	0.209174	0	0	0	10.5288	1.02234	1.89264	200.399	64.7573	59.8377	227.805	95.0781	194.942	#DIV/0!	-Inf	-0.672053	-Inf	ELK4	chr1:205600037:-	chr1_205630910_-
chr12:122218638-122218691:mpeak_20667|chr12_122217568_122231594_RHOF_NM_-|	43.7227	-3.75293	1.503	-2.49697	0.0125261	0.157878	0	0	0	0.957163	1.02234	8.20145	75.1495	70.1537	71.6478	131.131	108.369	58.041	#DIV/0!	-Inf	-0.455718	-Inf	RHOF	chr12:122218640:-	chr12_121780735_-
chr8:124822664-124822719:mpeak_77596|chr8_124780881_124824758_FAM91A1_NM_+|	253.969	-3.73973	1.31279	-2.8487	0.00438988	0.0903102	0	0	0	7.6573	2.04469	3.1544	414.575	439.81	334.619	679.585	623.63	542.557	#DIV/0!	-Inf	-0.634472	-Inf	FAM91A1	chr8:124822721:+	chr8_123810494_+
chr17:65131674-65131739:mpeak_36122|chr17_65074702_65241319_HELZ_NM_-|	68.0041	-3.72745	1.58642	-2.3496	0.0187934	0.199282	0	0	0	2.87149	16.3575	1.26176	86.4219	106.58	37.7923	177.075	165.62	222.07	#DIV/0!	-Inf	-1.29105	-Inf	HELZ	-	-
chr1:214820687-214820749:mpeak_7446|chr1_214776531_214836933_CENPF_NM_+|	20.043	-3.72245	1.75796	-2.11748	0.0342194	0.273188	0	0	0	2.87149	1.02234	11.9867	22.5448	45.8698	5.51137	44.9866	38.8491	66.8733	#DIV/0!	-Inf	-1.02761	-Inf	CENPF	-	chr1_214647369_+;chr1_214647392_+
chrX:76854868-76854937:mpeak_82931|chrX_76764107_77041755_ATRX_NM_-|	65.7019	-3.62014	1.40049	-2.5849	0.00974059	0.141222	0	0	0	4.78581	2.04469	11.3558	45.0897	94.4377	75.5845	162.718	199.357	193.049	#DIV/0!	-Inf	-1.36772	-Inf	ATRX	-	chrX_77599368_-
chr7:8021351-8021403:mpeak_71233|chr7_8008373_8125822_GLCCI1_NM_+|	49.6378	-3.57918	1.56924	-2.28084	0.0225582	0.22053	0	0	0	0	1.02234	8.83233	67.6345	107.929	59.0504	99.5449	143.128	108.511	#DIV/0!	-Inf	-0.581942	-Inf	GLCCI1	-	chr7_7981730_+;chr7_7981773_+
chr14:93267025-93267098:mpeak_25592|chr14_93260575_93305710_GOLGA5_NM_+|	36.9445	-3.47482	1.55479	-2.23491	0.0254232	0.230865	0	0	0	1.91433	0	8.20145	33.8173	80.9466	49.6023	77.5302	82.8099	108.511	#DIV/0!	-Inf	-0.709896	-Inf	GOLGA5	-	-
chr2:139264447-139264589:mpeak_45611|chr2_139259349_139326505_SPOPL_NM_+|	91.883	-3.44569	1.32406	-2.60237	0.0092582	0.138965	0	0	0	2.87149	8.17876	3.78528	101.452	143.006	99.2047	224.933	245.363	273.802	#DIV/0!	-Inf	-1.1145	-Inf	SPOPL	-	chr2_138506953_+
chr12:76752476-76752598:mpeak_19113|chr12_76749801_76953589_OSBPL8_NM_-|	77.9003	-3.43986	1.41685	-2.42782	0.0151897	0.178307	0	0	0	6.70014	6.13407	1.89264	107.714	125.467	61.4124	251.734	130.86	242.889	#DIV/0!	-Inf	-1.08624	-Inf	OSBPL8	-	-
chr7:8194730-8194809:mpeak_71248|chr7_8153674_8302242_ICA1_NM_-|	58.0816	-3.3934	1.51876	-2.23433	0.0254617	0.230903	0	0	0	0	1.02234	8.83233	88.9269	86.3431	77.1592	114.86	177.888	141.948	#DIV/0!	-Inf	-0.784127	-Inf	ICA1	chr7:8194748:-	-
chr16:46858290-46858397:mpeak_30799|chr16_46836982_46865074_C16orf87_NM_-|	29.8668	-3.38872	1.4056	-2.41088	0.0159141	0.182053	0	0	0	5.74298	4.08938	3.1544	36.3222	22.9349	55.1137	70.83	67.4747	92.7394	#DIV/0!	-Inf	-1.01445	-Inf	C16orf87	-	chr16_46824386_-
chr2:112999894-112999957:mpeak_45029|chr2_112974045_113012664_ZC3H8_NM_-|	16.8865	-3.38105	1.5064	-2.24446	0.0248027	0.228619	0	0	0	4.78581	7.15641	5.67792	13.7774	29.6804	6.29871	43.0723	56.229	35.9602	#DIV/0!	-Inf	-1.44279	-Inf	ZC3H8	chr2:112999904:-	chr2_112242330_-
chr17:57998677-57998727:mpeak_35628|chr17_57970406_58023911_RPS6KB1_NM_+|	1264.73	-3.3767	1.41172	-2.39191	0.0167607	0.187051	0	0	0	9.57163	3.06703	1.26176	2163.05	1749.8	987.323	3781.75	3060.9	3420	#DIV/0!	-Inf	-1.0665	-Inf	RPS6KB1	-	-
chr2:48124081-48124222:mpeak_43301|chr2_48035386_48132932_FBXO11_NM_-|	7.57686	-3.37186	1.60491	-2.10096	0.0356444	0.279186	0	0	0	4.78581	2.04469	7.57057	3.75747	12.142	7.08605	16.2718	13.2905	23.9735	#DIV/0!	-Inf	-1.21978	-Inf	FBXO11	-	-
chr14:97024189-97024239:mpeak_25762|chr14_96968712_97031291_PAPOLA_NM_+|	343.447	-3.32946	1.37226	-2.42626	0.0152553	0.178723	0	0	0	2.87149	4.08938	5.67792	592.428	469.49	250.374	1126.58	770.848	899.005	#DIV/0!	-Inf	-1.0915	-Inf	PAPOLA	chr14:97024242:+	chr14_96557902_+
chr17:16004276-16004403:mpeak_33350|chr17_15935797_16118874_NCOR1_NM_-|	62.767	-3.32557	1.5221	-2.18486	0.0288994	0.250288	0	0	0	1.91433	2.04469	10.0941	75.1495	107.929	31.4936	145.489	223.893	155.197	#DIV/0!	-Inf	-1.2897	-Inf	NCOR1	chr17:16004275:-;chr17:16004349:-	chr17_16101038_-
chr17:58003784-58003911:mpeak_35629|chr17_57970406_58023911_RPS6KB1_NM_+|	1264.49	-3.26162	1.43232	-2.27716	0.0227768	0.22053	0	0	0	2.87149	0	8.20145	2163.05	1749.8	987.323	3781.75	3060.9	3420	#DIV/0!	-Inf	-1.0665	-Inf	RPS6KB1	-	-
chr6:47547174-47547232:mpeak_68287|chr6_47445524_47591921_CD2AP_NM_+|	30.2977	-3.2021	1.50718	-2.12457	0.0336227	0.269632	0	0	0	6.70014	0	10.0941	25.0498	37.7751	21.2581	76.573	80.7652	105.357	#DIV/0!	-Inf	-1.6435	-Inf	CD2AP	-	chr6_47579488_+
chr10:38326975-38327047:mpeak_9451|chr10_38299577_38343302_ZNF33A_NM_+|	39.101	-3.19022	1.42301	-2.24187	0.0249695	0.229842	0	0	0	2.87149	6.13407	10.0941	33.8173	48.568	17.3215	117.731	100.19	132.485	#DIV/0!	-Inf	-1.81326	-Inf	ZNF33A	chr10:38327036:+	chr10_38038107_+
chr5:76355433-76355570:mpeak_63475|chr5_76326209_76358876_AGGF1_NM_+|	39.5973	-3.18151	1.38175	-2.30253	0.0213053	0.2143	0	0	0	6.70014	3.06703	3.78528	51.3521	51.2662	32.2809	145.489	82.8099	98.4174	#DIV/0!	-Inf	-1.27616	-Inf	AGGF1	-	chr5_77059645_+
chr19:15357788-15357955:mpeak_39462|chr19_15349256_15391262_BRD4_NM_-|	192.777	3.64509	1.46071	2.49542	0.0125809	0.157878	232.963	306.248	296.827	402.008	597.049	466.221	0	0	0	1.91433	0	10.0941	#DIV/0!	-0.809534	-Inf	Inf	BRD4	chr19:15357787:-;chr19:15357858:-;chr19:15357891:-	chr19_15246977_-;chr19_15247048_-;chr19_15247093_-
chr7:99667588-99667652:mpeak_73173|chr7_99662535_99680171_ZNF3_NM_-|	7.90077	3.99838	1.73487	2.30472	0.0211822	0.213661	5.00996	1.34911	16.5341	13.4003	20.4469	17.0338	0	0	0	7.6573	10.2234	3.1544	#DIV/0!	-1.15221	-Inf	Inf	ZNF3	chr7:99667596:-	chr7_100069979_-
chr19:15366882-15367077:mpeak_39463|chr19_15349256_15391262_BRD4_NM_-|	82.709	4.55261	1.49399	3.04728	0.00230925	0.0640526	149.046	144.355	214.943	163.675	177.888	130.592	0	0	0	1.91433	0	10.0941	#DIV/0!	0.106547	-Inf	Inf	BRD4	-	chr19_15256072_-;chr19_15256126_-;chr19_15256191_-
chr18:13543533-13543627:mpeak_37355|chr18_13218728_13645125_LDLRAD4_NM_+|	40.6274	4.77327	1.55349	3.07261	0.00212194	0.0616277	27.5548	149.751	88.9693	40.2008	81.7876	86.4306	0	0	0	5.74298	2.04469	5.04704	#DIV/0!	0.353432	-Inf	Inf	LDLRAD4	chr18:13543622:+	chr18_13543622_+
chr2:152117506-152117562:mpeak_45782|chr2_152108178_152118389_RBM43_NM_-|	3.2791	4.84764	2.26556	2.13971	0.0323779	0.264119	5.00996	10.7929	1.57468	1.91433	2.04469	6.93969	0	0	0	2.87149	0	8.20145	#DIV/0!	0.673067	-Inf	Inf	RBM43	chr2:152117509:-	-
chr10:38264969-38265031:mpeak_9449|chr10_38242123_38265453_ZNF25_NM_-|	4.33421	5.34941	2.1121	2.53275	0.0113173	0.149542	2.50498	14.8402	2.36202	0.957163	8.17876	5.04704	0	0	0	0.957163	10.2234	6.93969	#DIV/0!	0.474565	-Inf	Inf	ZNF25	chr10:38264975:-	chr10_37976039_-
chr19:58873157-58873207:mpeak_41845|chr19_58869015_58874214_ZNF497_NM_-|	3.33998	6.34659	3.12218	2.03274	0.0420783	0.309524	0	0	18.1088	0	4.08938	1.89264	0	0	0	12.4431	1.02234	2.52352	#DIV/0!	1.59799	-Inf	Inf	ZNF497	chr19:58873153:-	chr19_58361790_-
chr17:27266264-27266314:mpeak_33846|chr17_27233535_27278508_PHF12_NM_-|	4.61939	6.61861	2.68499	2.46504	0.0136997	0.167225	2.50498	4.04733	20.4708	2.87149	6.13407	0	0	0	0	15.3146	4.08938	0	#DIV/0!	1.58531	-Inf	Inf	PHF12	chr17:27266263:-	chr17_28939246_-
chr2:242034434-242034484:mpeak_48137|chr2_242028780_242041747_MTERF4_NR_-|	3.27837	7.65438	2.88596	2.65228	0.00799505	0.128591	17.5349	0	1.57468	0	0	2.52352	0	0	0	11.486	3.06703	3.1544	#DIV/0!	2.92078	-Inf	Inf	MTERF4	-	-
chr10:102745988-102746108:mpeak_11253|chr10_102739129_102747276_MRPL43_NM_-|	385.368	2.55678	1.17171	2.1821	0.029102	0.251097	691.375	690.744	851.901	825.074	929.311	619.525	1.25249	1.34911	0	7.6573	3.06703	3.1544	57247.3	-0.0876231	-2.4154	2.32778	MRPL43	chr10:102745995:-;chr10:102746033:-	chr10_100986277_-;chr10_100986346_-
chr2:112186873-112186964:mpeak_44996|chr2_112125152_112252692_MIR4435-2HG_NR_-|	549.025	1.99006	0.837165	2.37714	0.0174474	0.190867	835.412	828.354	725.926	1492.22	1619.39	1045.37	0	1.34911	3.14936	10.5288	18.4022	8.20145	35414.9	-0.798711	-3.04518	2.24646	MIR4435-2HG	chr2:112186891:-	chr2_111429300_-
chr3:37317621-37317981:mpeak_53828|chr3_37284681_37407570_GOLGA4_NM_+|	423.463	1.69601	0.783914	2.16352	0.030501	0.25341	770.282	577.419	719.628	1018.42	890.462	900.266	11.2724	21.5858	6.29871	22.9719	38.8491	104.095	5279.6	-0.442366	-2.08312	1.64075	GOLGA4	chr3:37317656:+	chr3_37276391_+
chr4:140427088-140427428:mpeak_61027|chr4_140417675_140477923_SETD7_NM_-|	139.64	1.86798	0.83884	2.22686	0.0259566	0.233505	152.804	369.656	325.958	215.362	240.251	288.312	16.2824	2.69822	1.57468	20.1004	22.4916	20.1882	4127.5	0.189619	-1.6108	1.80042	SETD7	chr4:140427127:-;chr4:140427192:-;chr4:140427287:-	chr4_139506026_-;chr4_139506149_-;chr4_139506207_-;chr4_139506093_-
chr2:220426427-220426506:mpeak_47596|chr2_220415564_220436268_OBSL1_NM_-|	49.0653	1.90228	0.965669	1.96991	0.0488487	0.335069	110.219	203.716	163.766	44.0295	24.5363	11.3558	1.25249	10.7929	7.08605	4.78581	4.08938	3.1544	2496.95	2.57945	0.669356	1.9101	OBSL1	chr2:220426444:-	chr2_219561709_-;chr2_219561757_-
chr1:243504334-243504386:mpeak_8230|chr1_243419306_243663057_SDCCAG8_NM_+|	5.16977	7.76133	2.99718	2.58955	0.00961026	0.141076	0	20.2367	0	0	3.06703	0	1.25249	0	0	5.74298	15.3352	16.4029	1615.71	2.72205	-4.90329	7.62534	SDCCAG8	-	-
chr12:4662165-4662372:mpeak_16339|chr12_4647949_4668022_RAD51AP1_NM_+|	79.344	1.31645	0.604966	2.17606	0.0295505	0.251809	127.754	129.515	116.526	131.131	169.709	178.539	1.25249	13.4911	8.66073	22.0147	32.715	20.8191	1597.12	-0.358922	-1.69063	1.33171	RAD51AP1	chr12:4662360:+	chr12_4553046_+;chr12_4553100_+;chr12_4553160_+;chr12_4553194_+
chr1:243468555-243468703:mpeak_8227|chr1_243419306_243663057_SDCCAG8_NM_+|	11.7226	5.28183	1.47613	3.57816	0.000346026	0.0235507	25.0498	17.5384	13.3848	11.486	22.4916	11.9867	1.25249	0	0	5.74298	15.3352	16.4029	1489.65	0.284219	-4.90329	5.18751	SDCCAG8	-	chr1_243305402_+
chr13:42293466-42293537:mpeak_21964|chr13_42142441_42535221_VWA8_NM_-|	20.8841	3.6968	1.14671	3.22384	0.00126485	0.0453329	26.3023	89.0413	63.7744	21.0576	6.13407	11.3558	0	2.69822	5.51137	12.4431	4.08938	8.20145	1454.54	2.2162	-1.59111	3.80731	VWA8	chr13:42293473:-	chr13_41719339_-
chr11:62283367-62283532:mpeak_13814|chr11_62201363_62314332_AHNAK_NM_-|	345.113	1.71718	0.512444	3.35096	0.000805312	0.0350672	641.275	1334.27	844.815	245.034	318.972	308.501	75.1495	82.2957	65.3491	95.7163	51.1172	78.8601	1265.9	1.69264	-0.0186527	1.7113	AHNAK	chr11:62283374:-	chr11_62515903_-;chr11_62515967_-;chr11_62516053_-
chr2:160317434-160317497:mpeak_45958|chr2_160176929_160473112_BAZ2B_NM_-|	11.2383	5.91456	1.40473	4.21046	2.54851e-05	0.00613281	12.5249	18.8875	15.7468	6.70014	12.2681	15.1411	1.25249	0	0	16.2718	18.4022	17.6647	1255.08	0.467371	-5.385	5.85237	BAZ2B	chr2:160317442:-	-
chr3:37317340-37317528:mpeak_53827|chr3_37284681_37407570_GOLGA4_NM_+|	95.714	1.78596	0.823981	2.16747	0.0301989	0.253379	171.591	106.58	136.997	174.204	155.396	198.727	11.2724	21.5858	6.29871	22.9719	38.8491	104.095	1060.27	-0.347737	-2.08312	1.73538	GOLGA4	-	chr3_37275941_+
chr9:96071427-96071482:mpeak_79609|chr9_95947211_96082648_WNK2_NM_+|	20.6775	2.20877	0.996442	2.21666	0.0266464	0.237127	66.382	31.0295	66.1365	12.4431	9.2011	10.0941	5.00996	12.142	11.0227	0.957163	9.2011	14.5103	580.478	2.36542	0.191729	2.17369	WNK2	chr9:96071478:+	chr9_93309195_+
chr6:12015779-12015912:mpeak_66801|chr6_12012723_12163515_HIVEP1_NM_+|	14.036	3.16036	1.4105	2.24059	0.0250524	0.229982	35.0698	21.5858	9.44807	28.7149	16.3575	21.4499	0	4.04733	0	2.87149	19.4245	9.46321	544.421	-0.00911019	-2.97213	2.96302	HIVEP1	-	-
chr1:243469688-243469748:mpeak_8228|chr1_243419306_243663057_SDCCAG8_NM_+|	6.01614	5.4226	1.67591	3.23562	0.00121381	0.044449	7.51495	9.44377	2.36202	3.82865	7.15641	3.1544	1.25249	0	0	5.74298	15.3352	16.4029	514.195	0.450422	-4.90329	5.35371	SDCCAG8	chr1:243469744:+	chr1_243306459_+
chr9:74586459-74586540:mpeak_79156|chr9_74526422_74587607_C9orf85_NM_+|	9.45151	3.20974	1.34811	2.38091	0.0172698	0.189814	16.2824	0	6.29871	7.6573	6.13407	3.78528	5.00996	2.69822	1.57468	32.5435	11.2458	20.1882	364.884	0.361455	-2.78492	3.14638	C9orf85	-	-
chr3:52945008-52945076:mpeak_54538|chr3_52939292_53080089_SFMBT1_NM_-|	18.0695	1.96583	0.819122	2.39992	0.0163986	0.184396	35.0698	32.3786	24.4075	16.2718	17.3799	12.6176	6.26246	16.1893	4.72403	9.57163	25.5586	16.4029	338.006	0.989319	-0.923177	1.9125	SFMBT1	-	-
chr14:55857633-55857717:mpeak_24220|chr14_55836643_55878576_ATG14_NM_-|	13.1406	2.11176	1.01473	2.0811	0.037425	0.287907	11.2724	17.5384	11.8101	6.70014	19.4245	19.5573	1.25249	8.09466	3.14936	15.3146	13.2905	30.2823	325.058	-0.169402	-2.23643	2.06703	ATG14	-	-
chr11:125497498-125497674:mpeak_16012|chr11_125495030_125525119_CHEK1_NR_+mpeak_16012|chr11_125495030_125545822_CHEK1_NM_+||	51.1301	1.55764	0.555043	2.80635	0.00501065	0.0978602	120.239	87.6922	51.177	40.2008	49.0725	52.3631	23.7973	29.6804	27.5569	40.2008	48.0502	43.5308	319.75	0.871363	-0.701541	1.5729	CHEK1	chr11:125497633:+;chr11:125497659:+	chr11_125627687_+;chr11_125627752_+
chr1:113617480-113617529:mpeak_3965|chr1_113615791_113666496_LRIG2_NM_+|	7.4519	3.20284	1.60542	1.99502	0.0460407	0.324716	13.7774	8.09466	18.1088	1.91433	7.15641	2.52352	10.0199	0	0.787339	6.70014	2.04469	18.2955	246.629	1.7859	-1.32311	3.10901	LRIG2	-	-
chr6:166999562-166999615:mpeak_70687|chr6_166826375_167275771_RPS6KA2_NM_-|	20.3794	1.73518	0.797733	2.17513	0.0296201	0.251995	21.2923	18.8875	19.6835	12.4431	28.6256	24.6043	3.75747	12.142	9.44807	23.9291	47.0279	22.7117	236.17	-0.133629	-1.88572	1.75209	RPS6KA2	-	chr6_166586074_-
chr5:162910024-162910186:mpeak_65857|chr5_162887516_162918117_HMMR_NM_+|	12.3676	2.6334	1.20756	2.18077	0.0292004	0.251247	17.5349	6.74555	2.36202	10.5288	10.2234	19.5573	0	5.39644	2.36202	17.2289	25.5586	30.9131	228.932	-0.597395	-3.24784	2.65044	HMMR	chr5:162910178:+	-
chr6:126136500-126136560:mpeak_69670|chr6_126102306_126249781_NCOA7_NM_+|	11.2292	3.00213	1.5165	1.97965	0.047743	0.330922	16.2824	9.44377	0.787339	10.5288	11.2458	8.83233	1.25249	6.74555	0	8.61446	35.7821	25.2352	221	-0.20713	-3.12203	2.9149	NCOA7	-	-
chr1:155648901-155649049:mpeak_5487|chr1_155630724_155658823_YY1AP1_NM_-|	217.595	1.76398	0.591498	2.98222	0.00286167	0.072217	480.957	257.68	266.908	170.375	68.4971	137.532	137.774	165.941	236.202	193.347	263.765	232.164	186.241	1.41762	-0.352346	1.76997	YY1AP1	-	chr1_155679202_-
chr4:285588-285645:mpeak_58213|chr4_266419_289944_ZNF732_NM_-|	7.90368	3.32753	1.47892	2.24998	0.0244502	0.228025	1.25249	4.04733	7.08605	2.87149	7.15641	13.8794	0	0	2.36202	22.0147	18.4022	15.772	174.792	-0.948754	-4.5722	3.62344	ZNF732	chr4:285587:-	chr4_291799_-
chr3:24185148-24185202:mpeak_53547|chr3_24164616_24536313_THRB_NM_-|	7.65329	5.03989	1.69418	2.97483	0.00293153	0.0731579	0	8.09466	11.0227	0	2.04469	0	2.50498	8.09466	7.08605	17.2289	14.3128	21.4499	162.143	3.22493	-1.58318	4.80812	THRB	-	-
chr13:45942814-45942864:mpeak_22090|chr13_45915479_45965166_TPT1-AS1_NR_+|	6.30657	4.99732	2.30095	2.17185	0.0298672	0.253138	0	0	14.9594	0	0	0	6.26246	16.1893	8.66073	4.78581	7.15641	17.6647	144.245	Inf	0.0715622	Inf	TPT1-AS1	chr13:45942865:+	chr13_45368729_+
chr15:83826101-83826332:mpeak_28535|chr15_83808027_83876770_HDGFRP3_NM_-|	151.125	0.801497	0.406092	1.97368	0.0484179	0.333211	121.492	155.148	104.716	178.032	181.977	168.445	78.9069	118.722	67.7111	224.933	214.692	198.727	143.723	-0.470644	-1.26651	0.79587	HDGFRP3	chr15:83826103:-	chr15_83157483_-
chr2:73823317-73823374:mpeak_43985|chr2_73612885_73836694_ALMS1_NM_+|	3.90664	5.67816	2.16859	2.61837	0.00883517	0.13408	6.26246	2.69822	8.66073	0	0	0	2.50498	6.74555	3.14936	7.6573	9.2011	0	142.109	Inf	-0.443141	Inf	ALMS1	chr2:73823369:+	chr2_73596240_+
chr16:89493183-89493233:mpeak_32354|chr16_89353521_89556969_ANKRD11_NR_-mpeak_32354|chr16_89335071_89556969_ANKRD11_NM_-||	10.4579	5.94693	2.26305	2.62783	0.00859302	0.132615	20.0399	0	0	0	0	0	15.0299	21.5858	6.29871	13.4003	24.5363	24.6043	140.092	Inf	-0.543339	Inf	ANKRD11	-	-
chr10:86152164-86152253:mpeak_10568|chr10_86088344_86273204_CCSER2_NM_+|	33.9137	3.17637	1.39984	2.2691	0.0232624	0.222962	13.7774	94.4377	39.3669	13.4003	14.3128	6.93969	37.5747	35.0769	0	50.7296	52.1396	49.2087	135.424	2.09047	-1.06574	3.15622	CCSER2	-	chr10_84392481_+
chr15:102197115-102197225:mpeak_28988|chr15_102194933_102264645_TARSL2_NM_-|	15.2069	2.6068	0.957474	2.72258	0.0064774	0.113095	30.0598	12.142	19.6835	2.87149	4.08938	5.04704	18.7874	22.9349	7.87339	15.3146	31.6927	11.9867	124.78	2.36561	-0.250356	2.61597	TARSL2	-	chr15_101656952_-
chr5:61648816-61648869:mpeak_62964|chr5_61601988_61681310_KIF2A_NM_+|	7.28511	3.7981	1.636	2.32158	0.0202558	0.208054	0	6.74555	9.44807	1.91433	1.02234	0	2.50498	14.8402	3.93669	18.1861	14.3128	14.5103	114.137	2.46317	-1.14332	3.60649	KIF2A	chr5:61648868:+	chr5_62353039_+
chr2:153246534-153246615:mpeak_45840|chr2_153191750_153504309_FMNL2_NM_+|	8.07653	2.59587	1.17467	2.20986	0.0271146	0.239762	7.51495	6.74555	5.51137	4.78581	1.02234	3.1544	1.25249	9.44377	7.08605	14.3574	26.581	9.46321	111.188	1.14147	-1.50303	2.64449	FMNL2	-	-
chr3:123218139-123218189:mpeak_55843|chr3_123213817_123303924_HACD2_NM_-|	5.32298	5.34389	1.86436	2.86634	0.00415254	0.0880578	1.25249	2.69822	12.5974	0.957163	0	0	3.75747	8.09466	3.14936	13.4003	4.08938	13.8794	110.31	4.11176	-1.06423	5.176	HACD2	chr3:123218138:-	chr3_123499292_-
chr4:85891828-85891881:mpeak_60027|chr4_85887970_85927159_WDFY3-AS2_NR_+|	7.52654	3.27477	1.37395	2.38346	0.0171506	0.188824	5.00996	4.04733	7.08605	0	5.11172	3.78528	6.26246	0	3.93669	9.57163	26.581	18.9264	105.521	0.859548	-2.43305	3.2926	WDFY3-AS2	chr4:85891880:+	chr4_84970726_+
chr12:51856191-51856243:mpeak_17904|chr12_51785100_51901209_SLC4A8_NM_+|	4.47146	5.49754	2.43784	2.25509	0.0241277	0.22674	0	8.09466	8.66073	0	0	0	13.7774	2.69822	0	8.61446	6.13407	5.67792	101.698	Inf	-0.310106	Inf	SLC4A8	-	-
chr15:101957834-101957884:mpeak_28976|chr15_101845560_102030187_PCSK6_NM_-|	7.6207	4.72158	2.19437	2.15168	0.0314229	0.258897	0	0	12.5974	0	0	0	7.51495	25.6331	7.87339	7.6573	11.2458	18.9264	92.1281	Inf	0.116866	Inf	PCSK6	-	-
chr1:46072983-46073404:mpeak_2206|chr1_46049659_46083732_NASP_NM_+|	248.475	1.24488	0.409098	3.04297	0.00234253	0.0641624	387.02	286.011	279.505	113.902	66.4524	82.0145	321.89	350.769	396.031	190.475	251.497	256.137	89.1312	1.86018	0.614318	1.24586	NASP	chr1:46073053:+;chr1:46073426:+	chr1_45607342_+;chr1_45607361_+;chr1_45607408_+;chr1_45607439_+;chr1_45607500_+;chr1_45607549_+;chr1_45607662_+
chr21:46567145-46567255:mpeak_51304|chr21_46494492_46645461_ADARB1_NR_+mpeak_51304|chr21_46494492_46641932_ADARB1_NM_+||	7.90768	3.03935	1.31726	2.30732	0.0210368	0.212813	7.51495	4.04733	11.8101	0	4.08938	0.63088	6.26246	9.44377	11.0227	9.57163	7.15641	23.3426	87.442	2.30787	-0.58414	2.89201	ADARB1	chr21:46567255:+	chr21_45147340_+
chr5:53406616-53406666:mpeak_62780|chr5_53182543_53606403_ARL15_NM_-|	9.20169	4.87071	2.12669	2.29027	0.0220055	0.218369	0	0	13.3848	0	0	0	22.5448	5.39644	21.2581	14.3574	13.2905	20.1882	81.6153	Inf	0.040542	Inf	ARL15	-	-
chr9:94053230-94053280:mpeak_79517|chr9_93976707_94124251_AUH_NM_-|	9.60509	4.94832	2.14422	2.30775	0.0210131	0.212813	0	0	11.8101	0	0	0	7.51495	29.6804	11.0227	12.4431	11.2458	31.544	73.4791	Inf	-0.195953	Inf	AUH	chr9:94053229:-	chr9_91290948_-
chr5:32395259-32395411:mpeak_62369|chr5_32356045_32444844_ZFR_NM_-|	107.64	0.863244	0.410949	2.10061	0.0356751	0.279186	113.977	116.023	122.038	41.158	44.9832	41.0072	132.764	211.81	147.232	87.1018	112.458	121.129	71.5805	1.46922	0.616918	0.852299	ZFR	-	chr5_32395192_-;chr5_32395238_-
chr14:31918113-31918168:mpeak_23530|chr14_31917660_31926680_DTD2_NM_-|	92.0796	2.02526	0.424276	4.77345	1.81097e-06	0.00174319	60.1196	40.4733	62.1998	43.0723	28.6256	35.9602	80.1594	78.2484	69.2858	177.075	217.759	211.976	71.4964	0.596578	-1.41415	2.01073	DTD2	-	-
chr6:110048296-110048355:mpeak_69355|chr6_110012423_110146290_FIG4_NM_+|	11.1378	3.7097	1.48972	2.4902	0.0127672	0.159306	8.76744	2.69822	22.8328	1.91433	0	0.63088	6.26246	9.44377	33.8556	18.1861	13.2905	15.772	69.2035	3.75229	0.0689575	3.68333	FIG4	-	-
chr17:5241304-5241439:mpeak_32908|chr17_5185557_5286888_RABEP1_NM_+|	17.9694	3.35293	1.21026	2.77043	0.00559829	0.104785	3.75747	5.39644	10.2354	6.70014	4.08938	0.63088	7.51495	18.8875	2.36202	34.4579	57.2513	64.3498	67.4071	0.763649	-2.43973	3.20338	RABEP1	chr17:5241437:+	-
chr6:80406234-80406295:mpeak_68740|chr6_80340999_80409214_SH3BGRL2_NM_+|	9.04473	4.94983	1.74577	2.83533	0.00457784	0.0926291	2.50498	0	10.2354	0.957163	0	0	7.51495	14.8402	8.66073	17.2289	32.715	13.8794	61.6155	3.7345	-1.04108	4.77558	SH3BGRL2	-	-
chr3:136320785-136320838:mpeak_56352|chr3_136057119_136471245_STAG1_NM_-|	14.4986	3.83199	1.29743	2.95352	0.00314174	0.0764225	11.2724	10.7929	2.36202	0	0	3.78528	7.51495	22.9349	9.44807	35.415	43.9608	26.497	61.2246	2.69002	-1.40795	4.09797	STAG1	chr3:136320784:-	chr3_136601925_-
chr20:10512110-10512160:mpeak_48584|chr20_10415950_10603306_SLX4IP_NM_+|	11.5492	3.98633	1.98752	2.00567	0.044891	0.320681	0	0	11.8101	0	1.02234	0	33.8173	6.74555	18.1088	19.1433	29.648	18.2955	60.3874	3.53007	-0.193366	3.72343	SLX4IP	-	-
chr2:118693067-118693143:mpeak_45179|chr2_118677972_118771739_CCDC93_NM_-|	22.1031	2.71267	0.850953	3.1878	0.00143358	0.0481853	18.7874	18.8875	9.44807	5.74298	4.08938	1.26176	20.0399	29.6804	33.0682	37.3293	57.2513	29.6514	56.9197	2.08664	-0.585535	2.67217	CCDC93	-	chr2_117935521_-
chr5:86629077-86629160:mpeak_63756|chr5_86564069_86686616_RASA1_NM_+|	10.1586	4.28313	1.47231	2.90913	0.00362433	0.0815751	6.26246	6.74555	7.87339	1.91433	0	0	2.50498	21.5858	14.1721	16.2718	22.4916	22.0808	54.5736	3.44731	-0.669175	4.11648	RASA1	-	-
chr2:44019844-44019897:mpeak_43128|chr2_44001177_44036843_DYNC2LI1_NM_+|	7.53925	3.85907	1.75198	2.20269	0.0276164	0.241661	6.26246	0	7.87339	0	1.02234	0	10.0199	16.1893	13.3848	3.82865	17.3799	14.5103	53.553	3.7894	0.1486	3.6408	DYNC2LI1	chr2:44019895:+	chr2_43792760_+
chr1:26662385-26662435:mpeak_1178|chr1_26648547_26680621_AIM1L_NM_-|	5.70764	4.90743	2.43797	2.01291	0.0441239	0.317778	0	6.74555	7.87339	0	0	0	0	5.39644	22.0455	2.87149	7.15641	16.4029	53.2723	Inf	0.0541622	Inf	AIM1L	-	chr1_26335894_-
chr10:96109088-96109144:mpeak_10919|chr10_96094062_96122733_NOC3L_NM_-|	15.0146	3.4915	1.53865	2.26919	0.0232567	0.222962	12.5249	13.4911	6.29871	0	4.08938	0	12.5249	47.2189	3.14936	20.1004	36.8044	23.9735	51.3804	2.98224	-0.36285	3.34509	NOC3L	-	chr10_94349345_-
chr11:73742248-73742298:mpeak_14801|chr11_73724570_73882064_C2CD3_NM_-|	16.3397	4.65735	2.18845	2.12815	0.033325	0.268441	0	0	18.8961	0	0	0	26.3023	51.2662	33.0682	4.78581	24.5363	37.2219	51.2383	Inf	0.733449	Inf	C2CD3	-	-
chr4:71826373-71826426:mpeak_59624|chr4_71768056_71847696_MOB1B_NM_+|	12.7762	3.13436	1.31865	2.37695	0.0174564	0.190867	0	6.74555	9.44807	0	3.06703	0.63088	18.7874	14.8402	14.1721	23.9291	19.4245	42.269	50.8171	2.13064	-0.840991	2.97163	MOB1B	chr4:71826424:+	chr4_70960706_+
chr3:136152389-136152436:mpeak_56345|chr3_136057119_136471245_STAG1_NM_-|	13.9436	4.25862	1.22416	3.47882	0.00050362	0.0287575	5.00996	8.09466	5.51137	1.91433	1.02234	0	7.51495	22.9349	9.44807	35.415	43.9608	26.497	46.6591	2.66429	-1.40795	4.07224	STAG1	-	-
chr9:37836258-37836373:mpeak_78946|chr9_37800550_37861136_DCAF10_NM_+|	78.8958	0.827699	0.422215	1.96037	0.0499521	0.336577	57.6146	36.426	33.8556	32.5435	33.7374	38.4837	105.209	90.3904	92.906	144.532	144.151	136.901	44.3306	0.287821	-0.560842	0.848663	DCAF10	-	-
chr20:30536597-30536686:mpeak_48918|chr20_30533692_30539883_PDRG1_NM_-|	67.0154	1.13673	0.553996	2.05188	0.0401813	0.30049	52.6046	22.9349	38.5796	20.1004	21.4692	27.1279	81.4119	79.5975	104.716	118.688	149.262	87.6924	42.9462	0.732211	-0.420493	1.1527	PDRG1	-	chr20_31948828_-
chr15:41745089-41745148:mpeak_26615|chr15_41709301_41772778_RTF1_NM_+|	81.9361	1.34319	0.626172	2.14509	0.0319456	0.261543	38.8272	55.3135	29.1315	30.6292	28.6256	20.8191	55.1096	89.0413	148.807	134.003	160.508	192.419	42.0785	0.622444	-0.733019	1.35546	RTF1	-	chr15_41452935_+
chr8:99264053-99264104:mpeak_76927|chr8_99205318_99306621_NIPAL2_NM_-|	13.6334	4.75928	1.47594	3.22458	0.00126158	0.0453329	8.76744	0	7.08605	0.957163	0	0	21.2923	17.5384	19.6835	30.6292	28.6256	29.0205	40.6401	4.04989	-0.593223	4.64311	NIPAL2	chr8:99264055:-	chr8_98251828_-
chr2:11389865-11389927:mpeak_42178|chr2_11323566_11484711_ROCK2_NM_-|	21.3672	2.11336	1.05439	2.00434	0.0450332	0.320754	16.2824	4.04733	5.51137	9.57163	0	4.41616	26.3023	22.9349	14.9594	58.3869	59.296	34.6984	40.253	0.885499	-1.24712	2.13262	ROCK2	-	-
chr1:78334270-78334320:mpeak_2940|chr1_78245308_78340530_FAM73A_NM_+|	19.9362	5.18322	1.88546	2.74905	0.00597686	0.10855	0	0	14.1721	0	0	0	31.3123	37.7751	37.0049	59.3441	25.5586	34.0675	40.0748	Inf	-0.165281	Inf	FAM73A	chr1:78334322:+	chr1_77868636_+
chr2:165429036-165429126:mpeak_46060|chr2_165349692_165478360_GRB14_NM_-|	22.4672	5.15691	1.95185	2.64206	0.00824043	0.129729	0	0	16.5341	0	0	0	56.3621	52.6153	20.4708	44.0295	48.0502	31.544	38.3183	Inf	0.0664197	Inf	GRB14	-	-
chr18:20516836-20516930:mpeak_37472|chr18_20513294_20606105_RBBP8_NM_+|	35.2155	2.25288	1.01616	2.21705	0.0266194	0.237127	13.7774	9.44377	6.29871	12.4431	3.06703	6.93969	28.8073	45.8698	5.51137	82.316	113.48	94.6321	36.8132	0.394982	-1.85672	2.2517	RBBP8	-	-
chr3:135806717-135806786:mpeak_56322|chr3_135684514_135863884_PPP2R3A_NM_+|	31.9003	2.03755	0.902064	2.25876	0.0238984	0.225911	6.26246	29.6804	8.66073	4.78581	2.04469	9.46321	50.0996	31.0295	42.5163	57.4298	61.3407	79.4909	36.0738	1.45285	-0.681194	2.13404	PPP2R3A	-	-
chr15:49304837-49304958:mpeak_26996|chr15_49285123_49338760_SECISBP2L_NM_-|	58.9763	1.60938	0.781282	2.05992	0.0394063	0.299008	37.5747	14.8402	9.44807	17.2289	8.17876	22.0808	68.887	39.1242	66.9238	105.288	163.575	154.566	35.3634	0.381499	-1.2753	1.6568	SECISBP2L	-	-
chr14:51130382-51130867:mpeak_23970|chr14_51102102_51135071_SAV1_NM_-|	49.274	1.72093	0.724868	2.37412	0.0175907	0.191171	20.0399	16.1893	15.7468	14.3574	4.08938	16.4029	32.5648	82.2957	40.1543	112.945	113.48	123.022	33.5297	0.576698	-1.17267	1.74937	SAV1	-	-
chr10:70090975-70091032:mpeak_9954|chr10_70044046_70092684_PBLD_NM_-|	18.6294	2.37628	1.00041	2.37531	0.0175344	0.190867	15.0299	6.74555	8.66073	1.91433	4.08938	0.63088	25.0498	40.4733	25.9822	41.158	15.3352	38.4837	33.2616	2.19771	-0.0537207	2.25143	PBLD	chr10:70090952:-;chr10:70090982:-	chr10_68331225_-
chr7:140098207-140098268:mpeak_74247|chr7_140035304_140098350_SLC37A3_NM_-|	41.7292	2.04925	0.810864	2.52724	0.0114964	0.151294	16.2824	5.39644	32.2809	4.78581	8.17876	8.20145	63.877	35.0769	65.3491	79.4445	104.279	77.5983	32.8416	1.35013	-0.669469	2.0196	SLC37A3	-	-
chr16:9188227-9188349:mpeak_29589|chr16_9185536_9210524_C16orf72_NM_+|	36.0952	4.7585	1.90711	2.49514	0.0125907	0.157878	18.7874	0	0	0	0	0.63088	45.0897	82.2957	48.815	58.3869	97.1227	82.0145	31.9875	4.89625	-0.430857	5.32711	C16orf72	-	-
chr7:138268592-138268645:mpeak_74136|chr7_138145078_138269486_TRIM24_NM_+|	39.093	2.97471	1.41937	2.09579	0.0361008	0.281211	35.0698	0	8.66073	3.82865	2.04469	0	100.199	66.1064	44.091	84.2303	67.4747	57.4101	31.1772	2.89639	0.0088141	2.88757	TRIM24	-	-
chr5:130994655-130994705:mpeak_64685|chr5_130980456_131132756_FNIP1_NM_-|	13.1754	4.11145	1.63872	2.50894	0.0121093	0.156908	3.75747	0	10.2354	0.957163	0	0	27.5548	13.4911	28.3442	24.8862	33.7374	15.1411	30.2483	3.86978	-0.0882012	3.95799	FNIP1	-	chr5_131658966_-
chr20:61474924-61474981:mpeak_50303|chr20_61473449_61493115_TCFL5_NM_-|	52.0001	1.29494	0.637015	2.03282	0.0420708	0.309524	12.5249	22.9349	9.44807	14.3574	13.2905	15.1411	41.3322	40.4733	74.0098	102.416	138.017	140.055	28.8212	0.0697261	-1.28801	1.35774	TCFL5	chr20:61474927:-	chr20_62843626_-
chr13:37575073-37575123:mpeak_21819|chr13_37574677_37583320_EXOSC8_NM_+|	34.2423	5.85009	1.73791	3.36617	0.000762192	0.0343631	0	0	13.3848	0	0	0	37.5747	44.5206	57.4757	77.5302	88.944	91.4777	28.7698	Inf	-0.886101	Inf	EXOSC8	-	-
chr7:99006155-99006220:mpeak_73111|chr7_98994363_99006305_PDAP1_NM_-|	519.993	1.09031	0.505959	2.15493	0.0311669	0.257672	316.88	134.911	183.45	169.418	126.771	100.31	708.91	744.709	784.189	933.234	1187.96	849.165	28.3868	0.679989	-0.408553	1.08854	PDAP1	chr7:99006158:-	chr7_99408543_-
chr2:61118920-61118970:mpeak_43478|chr2_61108629_61148897_REL_NM_+|	33.2892	5.40192	1.90125	2.84125	0.00449372	0.0915844	0	0	16.5341	0	0	0	90.1794	60.71	29.1315	54.5583	77.6982	70.6586	27.5537	Inf	-0.172712	Inf	REL	-	-
chr4:47458678-47458752:mpeak_59269|chr4_47453682_47465676_COMMD8_NM_-|	37.0187	2.286	1.02837	2.22293	0.0262203	0.234313	6.26246	0	18.8961	5.74298	3.06703	1.89264	48.8472	37.7751	54.3264	98.5878	89.9663	78.8601	26.7742	1.23308	-0.923906	2.15699	COMMD8	-	chr4_47456729_-
chr17:65200828-65200878:mpeak_36128|chr17_65074702_65241319_HELZ_NM_-|	67.9665	6.67891	1.95558	3.41531	0.000637083	0.0324379	20.0399	0	0	0	0	0	86.4219	106.58	37.7923	177.075	165.62	222.07	26.049	Inf	-1.29105	Inf	HELZ	-	-
chr11:113194128-113194180:mpeak_15577|chr11_113185250_113236946_TTC12_NM_+|	15.3886	3.55125	1.6995	2.08959	0.036655	0.284702	0	2.69822	14.9594	0.957163	0	0	25.0498	31.0295	49.6023	21.0576	15.3352	23.9735	25.0625	4.20539	0.807913	3.39747	TTC12	-	-
chr3:184947102-184947158:mpeak_57665|chr3_184911275_184971886_EHHADH_NM_-|	14.0373	5.06361	1.62996	3.10659	0.00189259	0.0577025	6.26246	5.39644	9.44807	0	0	0	8.76744	18.8875	56.6884	20.1004	29.648	13.2485	25.025	Inf	0.420994	Inf	EHHADH	chr3:184947105:-	chr3_185229319_-
chr2:118707066-118707122:mpeak_45180|chr2_118677972_118771739_CCDC93_NM_-|	19.2236	3.6004	1.29196	2.78678	0.00532342	0.101864	1.25249	6.74555	12.5974	0	3.06703	0	20.0399	29.6804	33.0682	37.3293	57.2513	29.6514	24.8772	2.74741	-0.585535	3.33295	CCDC93	chr2:118707061:-	chr2_117949490_-
chr15:42200404-42200454:mpeak_26654|chr15_42193379_42264755_EHD4_NM_-|	12.9124	4.10733	1.6252	2.52728	0.0114949	0.151294	8.76744	0	6.29871	0	0	0	25.0498	24.284	42.5163	10.5288	12.2681	25.2352	24.6045	Inf	0.935281	Inf	EHD4	chr15:42200357:-;chr15:42200402:-	chr15_41908206_-
chr2:99952317-99952367:mpeak_44674|chr2_99936262_99952860_TXNDC9_NM_-|	32.3203	5.19517	1.80948	2.87108	0.0040907	0.0880578	0	0	13.3848	0	0	0	67.6345	64.7573	39.3669	44.9866	59.296	98.4174	23.3783	Inf	-0.238962	Inf	TXNDC9	-	-
chr17:36946730-36946780:mpeak_34331|chr17_36926024_36956158_PIP4K2B_NM_-|	16.359	2.59575	1.14922	2.2587	0.0239021	0.225911	2.50498	2.69822	11.8101	0.957163	2.04469	1.26176	11.2724	31.0295	30.7062	35.415	38.8491	27.7587	23.3033	1.99651	-0.482763	2.47928	PIP4K2B	-	-
chr13:25907192-25907242:mpeak_21502|chr13_25875665_25914102_NUPL1_NM_+|	56.641	4.158	1.77624	2.3409	0.0192373	0.201275	0	20.2367	0	0.957163	0	0.63088	126.502	71.5028	64.5618	163.675	136.994	94.6321	23.1218	3.67165	-0.59027	4.26192	NUPL1	chr13:25907246:+	chr13_25333104_+
chr3:52702596-52702664:mpeak_54502|chr3_52582251_52719866_PBRM1_NM_-|	77.1363	1.5215	0.685634	2.21911	0.0264794	0.236316	23.7973	33.7278	39.3669	9.57163	6.13407	13.8794	102.704	201.017	118.888	75.6158	169.709	131.223	22.9271	1.71151	0.166492	1.54502	PBRM1	-	-
chr13:20315700-20315796:mpeak_21260|chr13_20249793_20357159_PSPC1_NR_-mpeak_21260|chr13_20277500_20357159_PSPC1_NM_-||	329.44	1.24685	0.47572	2.62097	0.00876809	0.133664	154.056	110.627	135.422	60.3012	39.8714	57.4101	667.578	380.449	703.881	666.185	499.927	477.577	22.8383	1.34427	0.0919902	1.25228	PSPC1	-	chr13_19741591_-;chr13_19741628_-
chr14:31823904-31823961:mpeak_23514|chr14_31762818_31889788_HEATR5A_NM_-|	14.9144	4.25567	1.55397	2.73857	0.00617063	0.110874	0	8.09466	7.08605	0	0	0	26.3023	45.8698	31.4936	27.7577	15.3352	17.0338	21.9659	Inf	0.785861	Inf	HEATR5A	chr14:31823903:-	chr14_31354698_-
chr6:151859333-151859446:mpeak_70331|chr6_151815174_151939081_CCDC170_NM_+|	75.0112	2.29418	0.619735	3.70187	0.00021402	0.0187282	27.5548	8.09466	19.6835	5.74298	7.15641	11.9867	90.1794	90.3904	71.6478	166.546	202.424	198.727	21.9386	1.1528	-1.17045	2.32325	CCDC170	-	-
chr3:9882937-9883066:mpeak_53055|chr3_9879891_9885702_RPUSD3_NM_-|	129.332	1.04004	0.494002	2.10533	0.0352626	0.278873	31.3123	62.0591	44.8783	20.1004	29.648	23.9735	180.359	187.526	270.057	201.961	264.787	235.318	21.6712	0.907111	-0.138183	1.04529	RPUSD3	chr3:9882941:-;chr3:9883004:-	chr3_9841245_-
chr14:102302822-102302912:mpeak_25888|chr14_102228134_102391477_PPP2R5C_NM_+|	98.7256	1.09216	0.49387	2.21143	0.0270062	0.239116	33.8173	36.426	17.3215	16.2718	24.5363	21.4499	123.997	149.751	131.486	183.775	226.961	218.916	21.6085	0.492091	-0.6358	1.12789	PPP2R5C	chr14:102302895:+	chr14_101836519_+;chr14_101836570_+
chr19:56110029-56110163:mpeak_41663|chr19_56105012_56110893_FIZ1_NM_-|	35.2654	4.809	1.47551	3.25922	0.00111718	0.0422896	23.7973	8.09466	0.787339	0.957163	1.02234	0	42.5847	44.5206	66.1365	99.5449	77.6982	58.041	21.3253	4.04517	-0.618594	4.66376	FIZ1	-	-
chr4:73977175-73977250:mpeak_59654|chr4_73942007_74124502_ANKRD17_NM_-|	21.2512	2.7237	1.09687	2.48315	0.0130227	0.161895	2.50498	9.44377	14.9594	0	1.02234	1.89264	36.3222	56.6626	34.6429	31.5864	38.8491	27.1279	21.0833	3.20648	0.387532	2.81895	ANKRD17	chr4:73977174:-	chr4_73111458_-;chr4_73111498_-
chr22:30738279-30738354:mpeak_52035|chr22_30730684_30752936_SF3A1_NM_-|	323.921	0.874257	0.44489	1.96511	0.0494018	0.335769	170.339	111.976	135.422	44.9866	41.9161	57.4101	487.219	681.301	862.136	374.251	440.631	479.469	20.5715	1.5334	0.649718	0.883678	SF3A1	-	chr22_30342306_-
chr6:34804930-34804988:mpeak_67786|chr6_34759793_34840089_UHRF1BP1_NM_+|	34.6991	2.59149	0.86955	2.98026	0.00288001	0.0724086	3.75747	8.09466	18.1088	1.91433	3.06703	3.1544	68.887	33.7278	44.091	73.7015	82.8099	75.0748	20.4225	1.88073	-0.658624	2.53936	UHRF1BP1	chr6:34804989:+	chr6_34837211_+
chr4:184566400-184566460:mpeak_61771|chr4_184562624_184580372_RWDD4_NM_-|	45.9563	2.28659	0.939393	2.43411	0.0149284	0.175546	0	8.09466	16.5341	1.91433	3.06703	4.41616	67.6345	67.4555	48.815	110.074	120.637	102.834	20.0882	1.38999	-0.858916	2.24891	RWDD4	chr4:184566400:-	chr4_183645251_-
chr12:133311262-133311339:mpeak_21167|chr12_133304029_133338474_ANKLE2_NM_-|	36.8945	3.16461	1.57998	2.00294	0.0451833	0.321156	0	0	14.1721	0.957163	1.02234	0	75.1495	53.9644	83.4579	64.1299	68.4971	81.3836	20.0009	2.83984	-0.00973184	2.84957	ANKLE2	-	chr12_132734674_-
chr2:201324481-201324531:mpeak_46949|chr2_201170603_201342358_SPATS2L_NM_+|	32.2453	3.98481	1.58884	2.508	0.0121418	0.156974	16.2824	0	7.08605	0	0	1.26176	23.7973	86.3431	66.1365	35.415	57.2513	93.3703	19.885	4.21105	-0.0777436	4.28879	SPATS2L	-	-
chrX:99956918-99956968:mpeak_83089|chrX_99931173_99987135_SYTL4_NM_-|	19.1183	4.36784	1.78928	2.44112	0.0146417	0.173081	16.2824	0	1.57468	0	0	0	38.8272	26.9822	70.0732	31.5864	24.5363	19.5573	19.7123	Inf	0.844378	Inf	SYTL4	-	-
chr10:101978752-101978813:mpeak_11191|chr10_101949384_101989344_CHUK_NM_-|	42.375	1.949	0.959912	2.0304	0.0423159	0.310255	10.0199	6.74555	19.6835	1.91433	6.13407	5.04704	32.5648	102.532	59.8377	40.2008	108.369	115.451	18.698	1.47681	-0.437657	1.91447	CHUK	-	-
chr3:49745338-49745403:mpeak_54356|chr3_49726949_49758617_RNF123_NM_+|	27.7395	2.03986	1.03374	1.97328	0.0484635	0.333211	8.76744	8.09466	15.7468	0.957163	5.11172	0	75.1495	32.3786	69.2858	52.6439	30.6703	34.0675	18.4425	2.42576	0.591023	1.83474	RNF123	chr3:49745397:+	chr3_49707963_+
chr3:133336362-133336413:mpeak_56264|chr3_133320237_133380737_TOPBP1_NM_-|	30.7937	4.64697	1.71237	2.71377	0.00665228	0.114931	13.7774	5.39644	0	0.957163	0	0	52.6046	82.2957	21.2581	43.0723	80.7652	69.3969	18.4177	4.32423	-0.307341	4.63157	TOPBP1	chr3:133336361:-	chr3_133617518_-
chr13:27648907-27649048:mpeak_21550|chr13_27643521_27746033_USP12_NM_-|	59.3642	2.29189	0.70379	3.25649	0.00112797	0.0424596	18.7874	2.69822	9.44807	5.74298	4.08938	8.20145	52.6046	60.71	55.1137	179.947	176.866	138.163	18.3661	0.778474	-1.55522	2.33369	USP12	chr13:27648908:-;chr13:27648935:-;chr13:27648995:-	chr13_27074772_-;chr13_27074860_-
chr7:77569619-77569779:mpeak_72735|chr7_77428108_77584174_PHTF2_NM_+|	141.584	1.2758	0.589025	2.16595	0.0303151	0.253379	13.7774	22.9349	40.9416	21.0576	40.8938	23.3426	175.349	129.515	125.187	384.779	379.29	341.937	18.0569	-0.135385	-1.36278	1.2274	PHTF2	chr7:77569690:+;chr7:77569776:+	chr7_77940315_+;chr7_77940336_+;chr7_77940372_+;chr7_77940458_+
chr1:32651934-32651984:mpeak_1482|chr1_32645344_32660502_TXLNA_NM_+|	24.9571	3.68572	1.74704	2.10969	0.0348852	0.276537	0	0	11.8101	0	0	0	55.1096	63.4082	77.9465	27.7577	38.8491	24.6043	18.0339	Inf	1.10699	Inf	TXLNA	-	-
chr10:16487027-16487104:mpeak_8878|chr10_16478941_16553044_PTER_NM_+|	29.2655	4.07509	1.35448	3.00859	0.0026246	0.0688116	3.75747	0	10.2354	1.91433	0	0	35.0698	49.9171	32.2809	72.7444	82.8099	62.4572	17.8986	2.86978	-0.894598	3.76438	PTER	chr10:16487112:+	-
chrX:109497174-109497252:mpeak_83310|chrX_109441862_109683461_AMMECR1_NM_-|	46.9435	1.67594	0.701606	2.38871	0.0169075	0.187681	13.7774	14.8402	6.29871	2.87149	5.11172	8.20145	68.887	48.568	78.7339	88.059	117.57	110.404	17.7973	1.10927	-0.687831	1.79711	AMMECR1	chrX:109497179:-	-
chr1:22033227-22033290:mpeak_925|chr1_22005932_22109688_USP48_NM_-|	34.0893	2.8869	1.1301	2.55454	0.0106329	0.145239	16.2824	10.7929	3.14936	4.78581	0	0	67.6345	67.4555	42.5163	85.1875	58.2736	52.994	17.0178	2.65889	-0.145516	2.8044	USP48	-	-
chr10:15830824-15830884:mpeak_8871|chr10_15821140_15902519_FAM188A_NM_-|	26.1622	3.37416	1.31934	2.55746	0.010544	0.145239	5.00996	4.04733	14.1721	0	0	1.89264	32.5648	25.6331	85.0326	39.2437	68.4971	37.8528	16.2182	3.61748	-0.0236085	3.64109	FAM188A	chr10:15830827:-	chr10_15788829_-
chr1:222823624-222823706:mpeak_7601|chr1_222791443_222838650_MIA3_NM_+|	33.9663	2.40007	0.972317	2.4684	0.0135719	0.166491	13.7774	8.09466	11.8101	1.91433	1.02234	1.89264	55.1096	118.722	35.4302	44.9866	51.1172	63.7189	16.0957	2.80209	0.388834	2.41326	MIA3	-	chr1_222650375_+
chr11:73839950-73840000:mpeak_14804|chr11_73724570_73882064_C2CD3_NM_-|	16.2147	4.51077	1.61151	2.79909	0.00512474	0.0995115	6.26246	4.04733	7.08605	0	0	0	26.3023	51.2662	33.0682	4.78581	24.5363	37.2219	15.7234	Inf	0.733449	Inf	C2CD3	-	-
chr8:62550502-62550561:mpeak_76075|chr8_62416068_62627199_ASPH_NM_-|	54.7896	1.73292	0.726783	2.38437	0.0171082	0.188824	13.7774	20.2367	18.8961	0.957163	7.15641	3.78528	92.6843	144.355	105.503	69.8729	65.4301	114.82	15.4463	2.15272	0.453644	1.69908	ASPH	chr8:62550506:-	chr8_61637998_-
chr6:7236725-7236791:mpeak_66638|chr6_7107829_7248743_RREB1_NM_+|	25.4999	4.2727	1.61973	2.63791	0.00834179	0.131019	7.51495	12.142	0	0	0	0	51.3521	52.6153	88.1819	38.2865	30.6703	25.2352	15.345	Inf	1.02855	Inf	RREB1	-	-
chr12:14954253-14954367:mpeak_16804|chr12_14940432_14956401_WBP11_NM_-|	162.727	1.38987	0.586985	2.36782	0.0178934	0.193215	36.3222	59.3609	20.4708	25.8434	12.2681	17.0338	221.691	310.295	254.31	326.392	309.77	358.971	14.7723	1.07473	-0.339817	1.41454	WBP11	chr12:14954253:-	-
chr1:16928865-16928965:mpeak_721|chr1_16890681_16940100_NBPF1_NM_-|	42.1949	3.40998	1.22426	2.78533	0.00534729	0.101864	11.2724	0	8.66073	1.91433	1.02234	0	46.3422	106.58	53.539	76.573	95.0781	105.357	14.482	2.76292	-0.424059	3.18698	NBPF1	chr1:16928885:-	-
chr1:230203107-230203165:mpeak_7924|chr1_230202941_230227335_GALNT2_NR_+mpeak_7924|chr1_230193535_230415048_GALNT2_NM_+||	61.6101	1.99306	0.936634	2.12789	0.0333459	0.268441	36.3222	6.74555	18.1088	5.74298	2.04469	1.26176	80.1594	203.716	144.083	86.1446	73.6088	81.3836	14.295	2.75708	0.827616	1.92947	GALNT2	-	-
chr6:13608371-13608421:mpeak_66825|chr6_13574760_13612021_SIRT5_NM_+|	35.6685	4.20706	1.7179	2.44895	0.0143273	0.172149	0	0	11.8101	0	0	0	56.3621	101.183	92.906	42.1152	59.296	64.3498	14.1466	Inf	0.595426	Inf	SIRT5	-	-
chr10:17657469-17657530:mpeak_8922|chr10_17632445_17659373_HACD1_NM_-|	37.9317	1.71391	0.783044	2.18878	0.0286129	0.248736	3.75747	9.44377	9.44807	1.91433	6.13407	3.1544	61.3721	35.0769	67.7111	72.7444	96.1004	88.3233	13.7971	1.01561	-0.647608	1.66322	HACD1	chr10:17657476:-	chr10_17615478_-
chr14:51131504-51131563:mpeak_23972|chr14_51102102_51135071_SAV1_NM_-|	44.4042	2.60426	0.966617	2.6942	0.00705588	0.119703	12.5249	4.04733	4.72403	0	2.04469	5.04704	32.5648	82.2957	40.1543	112.945	113.48	123.022	13.7382	1.58639	-1.17267	2.75906	SAV1	-	-
chr12:69776993-69777134:mpeak_18925|chr12_69753489_69783926_YEATS4_NM_+|	23.4555	3.6953	1.40816	2.6242	0.00868517	0.133609	1.25249	4.04733	9.44807	0	2.04469	0	15.0299	47.2189	46.453	59.3441	48.0502	48.5778	13.5673	2.85055	-0.520913	3.37147	YEATS4	-	-
chr2:37441001-37441081:mpeak_42940|chr2_37429046_37458740_CEBPZ_NM_-|	46.6972	3.3856	1.4489	2.33667	0.0194565	0.202938	1.25249	18.8875	1.57468	2.87149	2.04469	0	51.3521	97.1359	14.9594	114.86	113.48	141.948	13.2854	2.14306	-1.17982	3.32288	CEBPZ	-	chr2_37213885_-
chr5:141314145-141314212:mpeak_65381|chr5_141303384_141318085_KIAA0141_NM_+|	37.7741	5.44671	1.45032	3.75553	0.000172974	0.0175172	11.2724	0	7.08605	0	0	0	72.6445	56.6626	78.7339	64.1299	59.296	103.464	13.2367	Inf	-0.125127	Inf	KIAA0141	chr5:141314220:+	chr5_141934654_+
chr5:77411945-77412000:mpeak_63527|chr5_77298879_77590579_AP3B1_NM_-|	45.4777	3.19887	1.50082	2.13142	0.0330545	0.267384	32.5648	13.4911	3.93669	0.957163	0	0.63088	60.1196	253.633	64.5618	29.672	38.8491	47.316	13.2146	4.97639	1.70749	3.26891	AP3B1	-	-
chr17:65186266-65186453:mpeak_36126|chr17_65074702_65241319_HELZ_NM_-|	70.1797	2.06348	0.834491	2.47274	0.0134083	0.165467	18.7874	5.39644	5.51137	3.82865	6.13407	6.93969	86.4219	106.58	37.7923	177.075	165.62	222.07	12.8665	0.813	-1.29105	2.10405	HELZ	-	-
chr7:132657026-132657085:mpeak_74015|chr7_132470421_132766828_CHCHD3_NM_-|	32.1997	4.04874	1.74777	2.31651	0.0205302	0.209595	1.25249	0	14.9594	0	0	0.63088	36.3222	121.42	40.1543	59.3441	51.1172	61.1954	12.2882	4.68355	0.205219	4.47833	CHCHD3	chr7:132657040:-	chr7_132972285_-
chr10:89626736-89626891:mpeak_10683|chr10_89623194_89725043_PTEN_NM_+|	131.871	1.69067	0.670758	2.52053	0.0117178	0.153378	10.0199	31.0295	19.6835	13.4003	15.3352	8.20145	159.066	244.189	103.141	309.164	337.374	331.843	11.9932	0.717417	-0.950127	1.66754	PTEN	chr10:89626806:+	chr10_87867048_+;chr10_87867168_+
chr18:2802355-2802417:mpeak_37106|chr18_2655885_2802525_SMCHD1_NM_+|	32.8362	3.56434	1.73276	2.05703	0.0396834	0.299193	0	16.1893	2.36202	0	0	0.63088	41.3322	148.402	44.091	42.1152	49.0725	49.8396	11.9008	4.87801	0.729457	4.14856	SMCHD1	chr18:2802409:+	chr18_2802424_+
chr19:5119141-5119191:mpeak_38718|chr19_4969123_5151345_KDM4B_NM_+|	35.59	3.61793	1.81049	1.99832	0.0456824	0.32265	18.7874	1.34911	0	0	1.02234	0	97.6943	44.5206	115.739	60.3012	37.8268	49.8396	11.7094	4.29986	0.801832	3.49803	KDM4B	-	-
chr6:151907573-151907703:mpeak_70333|chr6_151815174_151939081_CCDC170_NM_+|	71.4212	2.78361	0.70297	3.95978	7.50179e-05	0.0113225	3.75747	14.8402	9.44807	2.87149	3.06703	3.1544	90.1794	90.3904	71.6478	166.546	202.424	198.727	11.1197	1.62497	-1.17045	2.79542	CCDC170	-	-
chr1:85948324-85948382:mpeak_3053|chr1_85787251_86044046_DDAH1_NM_-|	39.2211	2.07786	0.988679	2.10165	0.0355838	0.279186	2.50498	12.142	3.93669	5.74298	0	1.26176	55.1096	74.2011	41.729	94.7591	107.346	71.9204	10.8651	1.40763	-0.67998	2.08761	DDAH1	-	chr1_85482644_-
chr17:57949816-57949954:mpeak_35615|chr17_57937785_57970306_TUBD1_NM_-|	102.75	3.63313	1.41256	2.57201	0.0101109	0.143352	27.5548	0	3.93669	0	0	3.78528	137.774	136.26	162.979	223.976	278.078	258.661	10.8091	3.05649	-0.799678	3.85617	TUBD1	chr17:57949859:-;chr17:57949887:-	chr17_59872489_-;chr17_59872541_-
chr1:46527617-46527752:mpeak_2250|chr1_46509543_46642167_PIK3R3_NM_-|	96.1022	2.36535	1.04078	2.27266	0.0230469	0.22216	0	17.5384	12.5974	0.957163	6.13407	2.52352	100.199	147.053	181.088	196.218	317.949	170.969	10.5532	1.64816	-0.677633	2.32579	PIK3R3	-	chr1_46061983_-
chr1:111736561-111736688:mpeak_3866|chr1_111730303_111747160_DENND2D_NM_-|	59.8219	1.78104	0.786918	2.26331	0.0236168	0.22476	8.76744	6.74555	15.7468	4.78581	4.08938	3.1544	140.279	58.0117	100.779	113.902	162.553	99.0482	10.4523	1.37772	-0.328342	1.70606	DENND2D	chr1:111736559:-;chr1:111736607:-	chr1_111193922_-;chr1_111193986_-
chr13:48521484-48521534:mpeak_22174|chr13_48517580_48575462_SUCLA2_NM_-|	25.5813	2.09728	1.068	1.96375	0.049559	0.335769	5.00996	5.39644	5.51137	0	0	2.52352	31.3123	74.2011	50.3897	44.0295	41.9161	46.6852	10.2101	2.65713	0.233234	2.42389	SUCLA2	chr13:48521484:-	chr13_47947349_-
chr11:31508238-31508288:mpeak_13088|chr11_31454115_31531175_IMMP1L_NM_-|	92.0787	3.52796	1.68201	2.09746	0.0359529	0.280708	0	0	16.5341	0	2.04469	0	140.279	218.556	144.87	116.774	262.743	203.144	9.84749	3.01549	-0.210074	3.22557	IMMP1L	chr11:31508237:-	chr11_31486691_-
chr7:135291982-135292034:mpeak_74096|chr7_135242661_135333151_NUP205_NM_+|	46.3415	3.82477	1.88824	2.02557	0.0428084	0.312725	7.51495	20.2367	0	0	0	0	37.5747	281.964	104.716	26.8006	25.5586	51.7322	9.81189	Inf	2.02708	Inf	NUP205	-	chr7_135607286_+
chr18:12366960-12367064:mpeak_37286|chr18_12329782_12377275_AFG3L2_NM_-|	326.399	1.23015	0.514785	2.38964	0.0168647	0.187516	91.4319	37.7751	55.1137	23.9291	20.4469	27.7587	579.903	594.958	725.139	604.927	699.284	456.127	9.70109	1.35345	0.110148	1.2433	AFG3L2	-	chr18_12366975_-
chr8:63936628-63936692:mpeak_76094|chr8_63928012_63951610_GGH_NM_-|	142.632	2.01263	1.01491	1.98306	0.0473604	0.330688	25.0498	0	25.9822	4.78581	3.06703	5.67792	165.329	257.68	373.199	239.291	295.458	316.071	9.61408	1.91516	-0.0957084	2.01087	GGH	-	-
chr21:22857468-22857524:mpeak_50548|chr21_22370632_22910166_NCAM2_NM_+|	52.3883	4.01783	1.69298	2.37324	0.017633	0.191322	0	0	12.5974	0	0	0	146.541	152.449	99.992	80.4017	52.1396	84.538	9.47215	Inf	0.878106	Inf	NCAM2	chr21:22857521:+	chr21_21485197_+
chr10:127503599-127503675:mpeak_12060|chr10_127477574_127511837_UROS_NM_-|	44.1252	5.06898	1.42645	3.55357	0.000380037	0.0244044	5.00996	1.34911	13.3848	0.957163	0	0	91.4319	66.1064	51.177	93.8019	118.592	87.6924	9.4597	4.36649	-0.523841	4.89034	UROS	chr10:127503594:-	-
chr6:36063799-36063850:mpeak_67859|chr6_35995453_36076156_MAPK14_NM_+|	72.8779	5.21155	1.60775	3.24152	0.00118892	0.0440163	0	0	11.8101	0	0	0	129.007	140.307	105.503	190.475	152.329	145.103	9.45267	Inf	-0.380419	Inf	MAPK14	-	-
chr3:15751195-15751247:mpeak_53405|chr3_15712063_15901053_ANKRD28_NM_-|	75.8705	2.26013	0.988171	2.28719	0.0221849	0.21927	20.0399	10.7929	5.51137	5.74298	1.02234	1.89264	96.4418	226.651	81.0959	91.8876	203.447	165.922	8.99188	2.06962	-0.19054	2.26016	ANKRD28	-	-
chr4:184161361-184161420:mpeak_61722|chr4_184020462_184236815_WWC2_NM_+|	69.171	2.83741	0.839138	3.38134	0.000721345	0.0335201	10.0199	12.142	3.93669	2.87149	2.04469	1.26176	96.4418	84.994	113.377	123.474	165.62	213.868	8.85261	2.07878	-0.770652	2.84943	WWC2	-	chr4_183240261_+
chr6:144110002-144110059:mpeak_70069|chr6_143929316_144144810_PHACTR2_NM_+|	94.794	1.70935	0.812551	2.10368	0.0354064	0.279186	21.2923	5.39644	5.51137	6.70014	3.06703	8.83233	151.551	136.26	76.3719	250.777	189.134	282.634	8.84174	0.791804	-0.988422	1.78023	PHACTR2	-	-
chr17:7806638-7806829:mpeak_33117|chr17_7788122_7814781_CHD3_NM_+|	740.894	1.0999	0.498469	2.20656	0.0273449	0.240749	147.794	83.6448	125.974	84.2303	49.0725	45.4234	1467.92	1134.6	1440.83	1660.68	1593.84	1056.72	8.83952	0.999841	-0.0925503	1.09239	CHD3	-	-
chr21:47821596-47821642:mpeak_51387|chr21_47744035_47865196_PCNT_NM_+|	32.9463	3.81372	1.40892	2.70683	0.00679286	0.116761	13.7774	4.04733	7.87339	0	0	0	61.3721	122.769	110.227	18.1861	25.5586	31.544	8.72991	Inf	1.96712	Inf	PCNT	-	-
chr7:56107850-56107900:mpeak_72200|chr7_56079562_56119268_PSPH_NM_-|	72.6986	3.96467	1.57818	2.51217	0.0119991	0.15578	0	0	11.8101	0.957163	0	0	131.512	152.449	133.06	118.688	160.508	163.398	8.49603	3.62511	-0.0858639	3.71097	PSPH	chr7:56107850:-	chr7_56040157_-
chr12:57454679-57454779:mpeak_18469|chr12_57453842_57472574_NEMP1_NM_-|	40.6748	5.28591	1.31338	4.02465	5.70603e-05	0.0106798	7.51495	6.74555	5.51137	0	0	0	72.6445	90.3904	77.9465	67.9585	81.7876	77.5983	8.20473	Inf	0.0840424	Inf	NEMP1	-	-
chr21:33734259-33734336:mpeak_50682|chr21_33687410_33765312_URB1_NM_-|	55.5617	3.51695	1.45694	2.41393	0.0157817	0.181773	20.0399	1.34911	18.8961	0	0	0.63088	116.482	222.603	159.83	45.9438	36.8044	44.1616	8.07455	5.99674	1.97499	4.02175	URB1	-	-
chr16:69398479-69398541:mpeak_31461|chr16_69390959_69419891_TERF2_NM_-|	51.2367	4.97836	1.44587	3.44316	0.000574957	0.0307465	8.76744	0	7.87339	0	0	0	82.6644	143.006	97.63	67.9585	80.7652	126.176	7.72076	Inf	0.233968	Inf	TERF2	-	-
chr6:20480126-20480192:mpeak_66987|chr6_20402136_20490398_E2F3_NM_+|	97.6594	1.66083	0.631327	2.6307	0.00852093	0.13229	17.5349	8.09466	9.44807	9.57163	2.04469	4.41616	145.289	134.911	176.364	210.576	234.117	219.546	7.68296	1.12955	-0.540886	1.67044	E2F3	-	-
chr4:69188116-69188166:mpeak_59586|chr4_69180041_69215824_YTHDC1_NM_-|	68.8005	5.75313	1.36082	4.22771	2.36083e-05	0.00611818	10.0199	0	6.29871	0	0	0	107.714	128.165	87.3946	154.103	174.821	157.089	7.57188	Inf	-0.588237	Inf	YTHDC1	-	chr4_68322399_-
chr3:196120416-196120471:mpeak_57997|chr3_196083717_196159345_UBXN7_NM_-|	60.5607	1.62854	0.804403	2.02453	0.0429159	0.312951	7.51495	9.44377	3.93669	1.91433	7.15641	1.26176	73.897	111.976	95.268	108.159	147.218	158.982	7.43236	1.016	-0.559586	1.57558	UBXN7	-	-
chr10:76014580-76014636:mpeak_10355|chr10_75910942_76468078_ADK_NM_+|	104.264	1.44872	0.590132	2.45491	0.0140918	0.171082	16.2824	10.7929	20.4708	5.74298	4.08938	5.04704	172.844	267.124	207.857	179.947	188.111	172.861	7.33934	1.67601	0.260191	1.41582	ADK	-	chr10_74254875_+
chr17:27011887-27011989:mpeak_33809|chr17_26989301_27028456_SUPT6H_NM_+|	200.683	1.07601	0.526414	2.04404	0.0409497	0.30421	38.8272	47.2189	24.4075	7.6573	13.2905	5.67792	447.139	534.248	533.816	278.534	243.318	234.057	7.28969	2.05255	1.00323	1.04932	SUPT6H	-	chr17_28684953_+
chr6:53749737-53749788:mpeak_68395|chr6_53659777_53787432_LRRC1_NM_+|	58.3586	2.8066	0.998996	2.80942	0.00496304	0.0977807	6.26246	13.4911	3.93669	0.957163	3.06703	0	141.532	79.5975	103.929	100.502	127.793	119.236	7.28801	2.55752	-0.096448	2.65397	LRRC1	chr6:53749791:+	chr6_53884990_+
chr12:79997959-79998018:mpeak_19176|chr12_79986473_80084790_PAWR_NM_-|	41.9572	2.37999	1.15868	2.05405	0.039971	0.30025	1.25249	6.74555	9.44807	2.87149	1.02234	0	43.8372	130.864	66.1365	79.4445	98.1451	63.7189	7.24394	2.16364	-0.00281963	2.16646	PAWR	chr12:79997960:-	-
chr17:35502961-35503067:mpeak_34233|chr17_35444374_35766902_ACACA_NM_-|	57.6664	4.43676	1.42621	3.11089	0.00186527	0.0576523	0	13.4911	8.66073	0	0	0	131.512	191.574	136.21	67.9585	80.7652	61.8263	7.23451	Inf	1.12526	Inf	ACACA	chr17:35503019:-	-
chr8:59550286-59550336:mpeak_75995|chr8_59496759_59572404_NSMAF_NM_-|	85.5808	4.6094	1.65308	2.78838	0.00529731	0.101864	0	0	12.5974	0	0	0	145.289	215.858	197.622	111.031	158.463	186.11	6.76349	Inf	0.294471	Inf	NSMAF	-	-
chr3:186293617-186293676:mpeak_57725|chr3_186288464_186303132_DNAJB11_NM_+|	627.991	1.11652	0.515973	2.16392	0.0304706	0.25341	95.1893	71.5028	70.0732	57.4298	17.3799	35.3293	1178.59	1210.15	1184.16	1005.02	1304.51	1306.55	6.62669	1.10413	-0.0173319	1.12147	DNAJB11	-	chr3_186575857_+
chr17:38562631-38562677:mpeak_34476|chr17_38545899_38574202_TOP2A_NM_-|	125.148	2.23348	1.09231	2.04473	0.0408818	0.304042	31.3123	17.5384	6.29871	2.87149	6.13407	0	212.923	484.331	139.359	157.932	214.692	228.379	6.59199	2.61446	0.477189	2.13727	TOP2A	-	chr17_40406420_-
chr6:37401109-37401159:mpeak_67943|chr6_37400906_37447788_CMTR1_NM_+|	45.245	3.31275	1.45097	2.28312	0.0224232	0.220325	3.75747	0	11.0227	0.957163	0	0	85.1694	138.958	114.951	53.6011	61.3407	73.1821	6.53839	3.94876	0.849939	3.09882	CMTR1	-	-
chr12:102542778-102542944:mpeak_19716|chr12_102513955_102589728_PARPBP_NM_+|	103.607	2.12929	0.846633	2.51501	0.0119028	0.154828	0	13.4911	9.44807	2.87149	2.04469	1.89264	145.289	215.858	174.789	204.833	227.983	244.782	6.42031	1.75234	-0.338368	2.0907	PARPBP	chr12:102542785:+;chr12:102542831:+;chr12:102542946:+	chr12_102149006_+;chr12_102149166_+
chr1:117919812-117919872:mpeak_4303|chr1_117910084_118065446_MAN1A2_NM_+|	101.444	1.50901	0.742794	2.03154	0.0422004	0.310083	6.26246	4.04733	11.8101	10.5288	1.02234	6.93969	129.007	138.958	89.7566	269.92	236.162	312.917	6.18354	0.258534	-1.19502	1.45356	MAN1A2	chr1:117919868:+	chr1_117377244_+
chrX:64751268-64751321:mpeak_82647|chrX_64732781_64754686_LAS1L_NM_-|	39.6273	3.36394	1.62544	2.06956	0.0384936	0.293692	2.50498	0	11.8101	0	0	0	48.8472	147.053	155.893	33.5007	36.8044	39.1146	6.10375	Inf	1.68486	Inf	LAS1L	-	-
chr1:11136964-11137017:mpeak_514|chr1_11126805_11159967_EXOSC10_NM_-|	60.0757	3.32332	1.46919	2.262	0.0236972	0.224889	13.7774	0	5.51137	0	1.02234	0	100.199	172.686	202.346	59.3441	77.6982	88.3233	6.08822	4.23781	1.07636	3.16144	EXOSC10	-	-
chr13:96335303-96335353:mpeak_22659|chr13_96329392_96443126_DNAJC3_NM_+|	102.564	4.78282	1.65346	2.89261	0.00382059	0.0846813	0	0	11.8101	0	0	0	184.116	292.757	140.146	159.846	197.313	244.782	5.74216	Inf	0.0356956	Inf	DNAJC3	-	-
chr11:111675735-111675789:mpeak_15526|chr11_111657244_111742305_ALG9_NM_-|	36.1001	2.73754	1.28875	2.12419	0.033654	0.269632	2.50498	2.69822	8.66073	0	0	1.26176	75.1495	60.71	107.078	66.0442	46.0055	63.088	5.70679	3.45783	0.472095	2.98573	ALG9	chr11:111675734:-	chr11_111805002_-
chr17:79870980-79871051:mpeak_36918|chr17_79870490_79876058_SIRT7_NM_-|	131.818	4.06598	1.65735	2.4533	0.0141552	0.171543	0	0	15.7468	0	1.02234	0	304.355	221.254	303.913	249.819	223.893	261.815	5.69488	3.9451	0.1735	3.7716	SIRT7	chr17:79871000:-	-
chr6:150163308-150163457:mpeak_70250|chr6_150141839_150185480_LRP11_NM_-|	216.074	1.56477	0.686932	2.27791	0.0227319	0.22053	15.0299	36.426	11.0227	3.82865	10.2234	11.3558	304.355	379.1	425.95	414.451	408.938	572.209	5.63172	1.29808	-0.331096	1.62918	LRP11	chr6:150163355:-	-
chr21:43991493-43991595:mpeak_51100|chr21_43919741_44000454_SLC37A1_NM_+|	147.882	2.5212	1.22505	2.05805	0.0395855	0.299193	10.0199	37.7751	0.787339	2.87149	5.11172	0.63088	229.206	312.994	321.234	224.933	271.944	357.078	5.62665	2.49566	0.015925	2.47974	SLC37A1	chr21:43991545:+;chr21:43991585:+	chr21_42571429_+;chr21_42571474_+
chr2:36751083-36751140:mpeak_42865|chr2_36583369_36775667_CRIM1_NM_+|	49.6614	3.40125	1.33083	2.55573	0.0105965	0.145239	11.2724	5.39644	5.51137	0.957163	0	0	139.027	124.118	133.06	76.573	47.0279	52.994	5.59817	4.53437	1.1658	3.36856	CRIM1	chr2:36751141:+;chr2:36751180:+	chr2_36523997_+;chr2_36524036_+
chr12:62946650-62946748:mpeak_18636|chr12_62860596_62986365_MON2_NM_+|	96.8063	4.05043	1.35398	2.9915	0.00277607	0.0711734	7.51495	18.8875	20.4708	0.957163	0	0	244.236	416.875	183.45	90.9304	95.0781	83.2762	5.55002	5.61386	1.64907	3.96479	MON2	-	-
chr4:77590093-77590140:mpeak_59797|chr4_77356252_77699961_SHROOM3_NM_+|	61.3545	3.79258	1.36896	2.77042	0.00559848	0.104785	0	5.39644	8.66073	0	1.02234	0	106.462	134.911	151.956	112.945	111.436	103.464	5.36084	3.78135	0.262723	3.51863	SHROOM3	-	chr4_76668979_+
chr20:20023089-20023164:mpeak_48758|chr20_20017006_20036690_CRNKL1_NM_-|	90.2137	4.02565	1.40429	2.86669	0.00414792	0.0880578	13.7774	0	9.44807	0	1.02234	0	179.106	254.982	217.306	143.574	101.212	162.136	5.34826	4.50575	0.678774	3.82698	CRNKL1	-	chr20_20042505_-
chr5:107714639-107714690:mpeak_64132|chr5_107197561_107717799_FBXL17_NM_-|	122.242	3.70685	1.39806	2.65142	0.00801549	0.128591	11.2724	16.1893	0	0.957163	1.02234	0	197.894	281.964	292.103	226.848	244.34	194.311	5.33611	3.79421	0.21409	3.58012	FBXL17	chr5:107714638:-	chr5_108378938_-
chr5:110092422-110092471:mpeak_64171|chr5_110073836_110096903_SLC25A46_NM_+|	66.6936	3.13807	1.44667	2.16917	0.0300701	0.253266	1.25249	0	12.5974	1.91433	0	0	102.704	152.449	140.934	91.8876	145.173	151.411	5.24502	2.85497	0.0280087	2.82696	SLC25A46	-	-
chr4:142986196-142986259:mpeak_61107|chr4_142950067_143767604_INPP4B_NM_-|	52.0668	3.91627	1.33089	2.94259	0.00325483	0.0769988	2.50498	9.44377	5.51137	0.957163	0	0	107.714	130.864	97.63	93.8019	98.1451	78.2292	5.19325	4.18916	0.315453	3.8737	INPP4B	-	-
chr12:133131029-133131079:mpeak_21122|chr12_133067156_133159556_FBRSL1_NM_+|	66.5981	3.71458	1.18759	3.12782	0.00176108	0.0562343	6.26246	6.74555	4.72403	0.957163	1.02234	0	145.289	83.6448	113.377	132.088	157.441	147.626	5.1801	3.16315	-0.352841	3.51599	FBRSL1	chr12:133131082:+	chr12_132554493_+
chr1:10002679-10002727:mpeak_415|chr1_9990515_10002826_LZIC_NM_-|	75.4937	1.93006	0.930297	2.07467	0.0380172	0.291422	8.76744	6.74555	3.14936	3.82865	1.02234	1.89264	200.399	91.7395	71.6478	186.647	150.285	179.801	5.13003	1.46853	-0.506327	1.97486	LZIC	-	-
chr2:174097038-174097092:mpeak_46310|chr2_173940564_174130777_ZAK_NM_+|	85.9809	2.02307	0.860605	2.35075	0.0187356	0.199282	7.51495	6.74555	14.9594	0.957163	0	3.78528	177.854	192.923	201.559	91.8876	167.665	165.922	5.10539	2.62325	0.427791	2.19546	ZAK	-	-
chr1:6738448-6738533:mpeak_298|chr1_6695760_6761966_DNAJC11_NM_-|	59.6989	3.4539	1.50099	2.30108	0.0213873	0.2143	0	2.69822	11.8101	0.957163	0	0	107.714	132.213	190.536	87.1018	111.436	71.9204	5.05559	3.92197	0.670486	3.25148	DNAJC11	-	-
chrX:71821118-71821168:mpeak_82818|chrX_71801025_71934029_PHKA1_NM_-|	62.1087	3.93526	1.41899	2.77328	0.00554948	0.104741	7.51495	0	10.2354	0	0	0	169.086	221.254	136.997	73.7015	76.6758	49.8396	5.04905	Inf	1.39716	Inf	PHKA1	-	-
chr12:3044538-3044593:mpeak_16289|chr12_3000032_3048476_TULP3_NM_+|	89.8132	4.17634	1.24748	3.34781	0.000814522	0.0350672	2.50498	9.44377	10.2354	1.91433	0	0	86.4219	165.941	196.835	169.418	208.558	226.486	4.93862	3.53462	-0.428303	3.96293	TULP3	chr12:3044589:+	chr12_2935422_+
chr1:100742020-100742078:mpeak_3450|chr1_100731713_100756958_RTCA_NM_+|	63.9669	2.56619	0.999166	2.56833	0.0102188	0.143352	6.26246	2.69822	7.87339	0.957163	1.02234	1.26176	101.452	168.639	84.2453	105.288	147.218	140.686	4.75088	2.37675	-0.150116	2.52687	RTCA	-	-
chr12:116669925-116669975:mpeak_20336|chr12_116399203_116714991_MED13L_NM_-|	183.331	5.55998	1.67913	3.31122	0.000928893	0.0383433	0	0	14.1721	0	0	0	311.87	402.035	189.749	446.038	384.402	451.71	4.70493	Inf	-0.504723	Inf	MED13L	-	-
chr1:10197219-10197269:mpeak_431|chr1_10093040_10239952_UBE4B_NM_+|	67.6656	3.29466	1.3483	2.44357	0.0145427	0.172645	7.51495	0	8.66073	0	0	0.63088	154.056	171.337	199.197	80.4017	93.0334	97.1556	4.62523	4.68032	0.955079	3.72524	UBE4B	-	-
chr17:17068371-17068537:mpeak_33409|chr17_16946073_17088136_MPRIP_NM_+|	76.6478	2.15497	0.863554	2.49546	0.0125793	0.157878	8.76744	8.09466	4.72403	1.91433	0	1.89264	170.339	175.384	129.124	142.617	156.419	120.498	4.54592	2.50339	0.178674	2.32472	MPRIP	-	-
chr12:15822313-15822363:mpeak_16820|chr12_15774364_15942510_EPS8_NM_-|	182.713	3.66753	1.77946	2.06104	0.0392989	0.29853	18.7874	0	0	0.957163	0	0	517.279	357.514	452.72	301.506	237.184	306.608	4.24569	4.29486	0.651194	3.64366	EPS8	-	-
chr6:32815404-32815457:mpeak_67612|chr6_32813562_32821748_TAP1_NM_-|	104.836	3.67697	1.36962	2.68467	0.00726016	0.122271	13.7774	0	9.44807	0	1.02234	0	221.691	286.011	320.447	128.26	132.905	144.472	4.20675	4.50575	1.0297	3.47605	TAP1	-	-
chr12:118480436-118480494:mpeak_20419|chr12_118472163_118499979_WSB2_NM_-|	167.847	2.73545	1.03487	2.64329	0.00821054	0.129561	0	5.39644	17.3215	2.87149	2.04469	0.63088	321.89	253.633	247.224	371.379	449.832	341.937	4.14184	2.03403	-0.499513	2.53355	WSB2	chr12:118480437:-;chr12:118480462:-	chr12_118042633_-
chr16:27242568-27242618:mpeak_30305|chr16_27236557_27280113_NSMCE1_NM_-|	99.4426	3.24646	1.44163	2.25194	0.0243263	0.227451	0	1.34911	14.1721	0	2.04469	0	225.448	183.479	189.749	187.604	236.162	153.304	3.88888	2.92429	0.0530307	2.87126	NSMCE1	chr16:27242567:-	chr16_27231247_-
chr5:150080003-150080064:mpeak_65600|chr5_150071443_150080669_RBM22_NM_-|	91.7063	1.64915	0.832664	1.98057	0.04764	0.330922	11.2724	5.39644	8.66073	4.78581	1.02234	0	184.116	207.763	262.971	122.517	159.486	132.485	3.868	2.12467	0.659837	1.46483	RBM22	-	-
chr20:43624034-43624092:mpeak_49453|chr20_43595119_43703658_STK4_NM_+|	98.3456	5.79575	1.36794	4.23685	2.26675e-05	0.00610935	8.76744	1.34911	9.44807	0	0	0	221.691	113.325	175.577	187.604	245.363	217.023	3.83175	Inf	-0.348243	Inf	STK4	-	-
chr3:160282190-160282242:mpeak_57073|chr3_160219990_160283376_KPNA4_NM_-|	205.825	5.48785	1.5888	3.45409	0.000552155	0.0300942	0	0	12.5974	0	0	0	395.787	335.928	259.034	530.268	463.122	473.16	3.81451	Inf	-0.565834	Inf	KPNA4	chr3:160282187:-	chr3_160564402_-
chr6:33252575-33252632:mpeak_67663|chr6_33247151_33257304_WDR46_NM_-|	133.252	2.18589	0.972161	2.24849	0.0245452	0.228025	5.00996	6.74555	25.9822	0.957163	2.04469	1.89264	279.306	244.189	468.467	165.589	209.581	189.264	3.80435	2.94677	0.813479	2.1333	WDR46	chr6:33252581:-	chr6_33284805_-
chr3:179288641-179288692:mpeak_57424|chr3_179280667_179305717_ACTL6A_NM_+|	73.4921	4.51252	1.41643	3.18584	0.00144336	0.0481853	8.76744	10.7929	0.787339	0	0	0	154.056	178.083	216.518	83.2731	118.592	111.035	3.70863	Inf	0.810203	Inf	ACTL6A	-	-
chr3:179450360-179450410:mpeak_57447|chr3_179370932_179501835_USP13_NM_+|	103.996	2.76711	1.24454	2.2234	0.026189	0.234313	0	9.44377	9.44807	0	0	1.26176	221.691	271.171	291.315	117.731	157.441	168.445	3.61369	3.90425	0.821865	3.08239	USP13	-	-
chr19:56190333-56190410:mpeak_41686|chr19_56186560_56206513_EPN1_NM_+|	147.97	4.59155	1.38048	3.32605	0.00088087	0.0368652	10.0199	0	11.0227	0.957163	0	0	303.103	267.124	309.424	379.994	280.122	213.868	3.58824	4.45841	0.00932337	4.44909	EPN1	chr19:56190395:+	chr19_55679028_+
chr17:3969786-3969839:mpeak_32772|chr17_3910264_4046253_ZZEF1_NM_-|	63.6253	3.49727	1.39526	2.50654	0.0121919	0.157072	10.0199	2.69822	8.66073	0	0	0	126.502	304.899	166.128	49.7725	44.9832	49.8396	3.57788	Inf	2.04699	Inf	ZZEF1	-	-
chr3:196509598-196509709:mpeak_58036|chr3_196466727_196555189_PAK2_NM_+|	636.049	1.12299	0.404428	2.77674	0.00549074	0.103923	47.5947	39.1242	36.2176	18.1861	21.4692	20.8191	1447.88	1042.86	1090.46	1399.37	1293.27	1175.33	3.43282	1.02352	-0.11113	1.13465	PAK2	chr3:196509705:+	chr3_196782833_+
chr6:150144782-150144832:mpeak_70246|chr6_150141839_150185480_LRP11_NM_-|	209.734	5.17256	1.57187	3.2907	0.000999383	0.0395904	0	0	11.8101	0	0	0	304.355	379.1	425.95	414.451	408.938	572.209	3.19362	Inf	-0.331096	Inf	LRP11	chr6:150144782:-	chr6_149823646_-
chr11:35244816-35244876:mpeak_13243|chr11_35160416_35250675_CD44_NM_+|	152.621	1.87879	0.866796	2.16751	0.0301961	0.253379	15.0299	5.39644	22.0455	0.957163	0	2.52352	385.767	492.425	457.444	140.703	161.53	147.626	3.17989	3.60906	1.56998	2.03908	CD44	chr11:35244866:+	chr11_35223329_+
chr5:140905615-140905754:mpeak_65359|chr5_140896575_140998622_DIAPH1_NM_-|	274.385	1.62555	0.715905	2.27062	0.0231702	0.222942	15.0299	10.7929	37.7923	3.82865	2.04469	6.3088	593.681	617.893	797.574	424.023	417.117	366.542	3.16627	2.3846	0.734344	1.65026	DIAPH1	chr5:140905666:-	-
chr8:140897441-140897492:mpeak_77844|chr8_140743471_141468678_TRAPPC9_NM_-|	186.353	3.47527	1.75584	1.97926	0.0477868	0.330922	0	0	18.1088	0	0	0	425.847	553.135	769.23	165.589	168.687	135.639	3.10754	Inf	1.89541	Inf	TRAPPC9	-	-
chr3:176913362-176913422:mpeak_57363|chr3_176743312_176915048_TBL1XR1_NM_-|	161.082	2.12007	0.972367	2.18032	0.0292338	0.251247	8.76744	13.4911	1.57468	0	1.02234	5.67792	299.345	230.698	239.351	454.652	295.458	382.944	3.09766	1.83068	-0.558422	2.3891	TBL1XR1	chr3:176913366:-	chr3_177195566_-
chr21:46195679-46195791:mpeak_51264|chr21_46191404_46221751_UBE2G2_NM_-|	159.89	1.91989	0.826973	2.32159	0.020255	0.208054	8.76744	0	10.2354	1.91433	0	3.1544	345.688	295.455	282.655	339.793	319.994	311.024	3.08555	1.90652	-0.0716136	1.97813	UBE2G2	-	-
chr15:40708118-40708170:mpeak_26512|chr15_40697685_40710328_IVD_NM_+|	194.541	4.12519	1.2101	3.40897	0.000652084	0.0324379	22.5448	6.74555	10.2354	0	2.04469	0	445.887	295.455	564.522	402.965	291.368	292.729	3.02679	4.27284	0.403792	3.86905	IVD	chr15:40708169:+	chr15_40415969_+
chr18:61082580-61082632:mpeak_38208|chr18_61058309_61089752_VPS4B_NM_-|	131.823	1.72	0.7691	2.23638	0.0253266	0.230298	12.5249	5.39644	5.51137	1.91433	4.08938	1.26176	259.266	306.248	219.668	238.333	308.748	218.916	2.98437	1.6894	0.0356868	1.65371	VPS4B	-	-
chr19:11548879-11548947:mpeak_39190|chr19_11546077_11561460_PRKCSH_NM_+|	210.735	3.38818	1.18735	2.85355	0.00432334	0.0896378	27.5548	5.39644	23.6202	0.957163	0	0.63088	547.339	619.242	732.225	180.904	184.022	206.929	2.97932	5.15475	1.73137	3.42338	PRKCSH	-	chr19_11438082_+;chr19_11438122_+
chr5:95105812-95105881:mpeak_63893|chr5_95066849_95128762_RHOBTB3_NM_+|	279.641	1.21148	0.614506	1.97147	0.0486702	0.334292	16.2824	17.5384	7.87339	9.57163	7.15641	6.3088	382.01	600.354	443.272	471.881	744.267	649.176	2.9246	0.855904	-0.387821	1.24372	RHOBTB3	-	chr5_95770188_+
chr16:56413055-56413105:mpeak_30999|chr16_56396968_56459450_AMFR_NM_-|	264.814	4.60073	1.80732	2.5456	0.010909	0.147009	18.7874	0	0	0	0	0	596.186	573.372	776.316	402.965	365.999	444.14	2.89649	Inf	0.681714	Inf	AMFR	-	-
chr16:89592909-89592959:mpeak_32362|chr16_89574795_89623294_SPG7_NM_+|	113.294	4.66292	1.53589	3.03596	0.00239768	0.0646224	2.50498	0	12.5974	0	0	0	232.963	161.893	388.158	203.876	205.491	152.042	2.89313	Inf	0.479987	Inf	SPG7	chr16:89592962:+	chr16_89526551_+
chr7:158567279-158567329:mpeak_74756|chr7_158526943_158622319_ESYT2_NM_-|	192.32	4.5986	1.58111	2.90847	0.00363202	0.0815751	0	0	11.8101	0	0	0	298.093	460.047	485.001	308.206	368.044	376.636	2.85006	Inf	0.23964	Inf	ESYT2	-	chr7_158774562_-
chr5:228366-228518:mpeak_61911|chr5_218337_256448_SDHA_NM_+|	213.194	1.80058	0.789697	2.28009	0.0226025	0.22053	7.51495	22.9349	19.6835	0.957163	3.06703	1.89264	509.764	515.36	758.207	292.892	206.514	219.546	2.81122	3.08287	1.31061	1.77226	SDHA	chr5:228499:+;chr5:228526:+	chr5_228382_+
chr10:76462872-76462922:mpeak_10369|chr10_75910942_76468078_ADK_NM_+|	100.742	2.67215	1.0488	2.54781	0.0108402	0.146764	3.75747	2.69822	11.0227	0	2.04469	0.63088	172.844	267.124	207.857	179.947	188.111	172.861	2.69802	2.70766	0.260191	2.44747	ADK	-	-
chr6:36514428-36514491:mpeak_67895|chr6_36463691_36515293_STK38_NM_-|	220.249	2.48745	1.14149	2.17913	0.0293223	0.251366	7.51495	0	15.7468	4.78581	0	0	468.432	415.526	421.226	488.153	414.05	407.549	2.67338	2.28112	-0.00503975	2.28616	STK38	-	chr6_36546652_-
chr3:49065134-49065200:mpeak_54307|chr3_49061837_49066875_IMPDH2_NM_-|	249.701	1.31444	0.663998	1.97959	0.0477499	0.330922	16.2824	16.1893	18.8961	3.82865	1.02234	5.04704	469.684	603.052	873.159	304.378	378.268	306.608	2.63981	2.37565	0.976022	1.39963	IMPDH2	-	-
chr16:70546131-70546236:mpeak_31588|chr16_70515047_70557457_COG4_NM_-|	162.7	4.15678	1.36126	3.05363	0.00226092	0.0637164	18.7874	9.44377	5.51137	0.957163	0	0	335.668	321.088	621.998	236.419	191.178	211.345	2.6387	5.13966	1.00098	4.13868	COG4	-	-
chr18:9367811-9367893:mpeak_37190|chr18_9334764_9399343_TWSG1_NM_+|	138.032	2.26406	0.790359	2.8646	0.00417534	0.0880735	6.26246	5.39644	7.87339	2.87149	0	1.89264	261.771	260.378	224.392	307.249	251.497	326.796	2.61637	2.03558	-0.24634	2.28192	TWSG1	chr18:9367891:+	chr18_9367891_+
chr5:174945880-174945930:mpeak_66068|chr5_174905513_174953640_SFXN1_NM_+|	294.227	5.15993	1.65657	3.11483	0.0018405	0.0571488	0	0	14.9594	0	0	0	432.109	628.685	680.261	540.797	571.491	662.424	2.57765	Inf	-0.0276227	Inf	SFXN1	-	chr5_175518927_+
chr8:144416905-144416979:mpeak_77979|chr8_144391713_144442147_TOP1MT_NM_-|	222.75	2.36313	1.00843	2.34338	0.0191098	0.200252	16.2824	0	8.66073	1.91433	0	1.26176	444.634	495.123	642.468	343.621	345.552	373.481	2.36468	2.97332	0.574283	2.39904	TOP1MT	-	-
chr4:39829444-39829511:mpeak_59111|chr4_39827108_39979576_PDS5A_NM_-|	294.346	3.94051	1.08695	3.62527	0.000288657	0.0213733	22.5448	6.74555	14.1721	0	1.02234	1.26176	422.09	983.501	462.168	501.553	612.384	504.704	2.32699	4.25007	0.206524	4.04355	PDS5A	chr4:39829448:-	chr4_39827824_-
chrX:53590699-53590774:mpeak_82491|chrX_53560372_53713674_HUWE1_NM_-|	407.374	1.85429	0.619243	2.99444	0.00274947	0.0709806	27.5548	29.6804	23.6202	3.82865	2.04469	1.89264	1337.66	1165.63	1079.44	448.909	353.731	414.488	2.25681	3.3801	1.55758	1.82253	HUWE1	-	-
chr17:66099229-66099288:mpeak_36197|chr17_66097695_66121725_LINC00674_NR_+|	402.109	1.56311	0.684677	2.28298	0.0224315	0.220325	13.7774	12.142	8.66073	8.61446	14.3128	1.89264	628.751	514.011	429.887	1163.91	951.803	1077.54	2.19885	0.478444	-1.02183	1.50028	LINC00674	chr17:66099284:+	chr17_68103147_+
chr6:152133844-152133894:mpeak_70365|chr6_152011630_152419866_ESR1_NM_+|	260.537	2.24431	0.979027	2.29239	0.0218831	0.21779	0	10.7929	11.0227	2.87149	2.04469	0	671.335	439.81	508.621	582.912	452.899	444.14	2.02026	2.14975	0.130237	2.01952	ESR1	-	-
chr7:23552506-23552586:mpeak_71472|chr7_23545188_23571660_TRA2A_NM_-|	529.852	1.3182	0.582383	2.26346	0.0236075	0.22476	11.2724	14.8402	26.7695	6.70014	9.2011	13.2485	869.229	716.378	1069.21	1063.41	1455.82	1102.15	1.99194	0.859298	-0.447927	1.30723	TRA2A	-	-
chr1:225706748-225706798:mpeak_7736|chr1_225685514_225840845_ENAH_NM_-|	252.484	1.95343	0.965527	2.02317	0.0430555	0.31363	13.7774	0	4.72403	2.87149	0	1.89264	392.03	647.573	434.611	431.68	539.798	560.853	1.88251	1.95735	-0.0557823	2.01314	ENAH	chr1:225706746:-	chr1_225519046_-
chr17:66111599-66111662:mpeak_36200|chr17_66097695_66121725_LINC00674_NR_+|	400.62	1.95897	0.734566	2.66685	0.00765664	0.126758	7.51495	17.5384	3.14936	1.91433	5.11172	6.3088	628.751	514.011	429.887	1163.91	951.803	1077.54	1.79333	1.08063	-1.02183	2.10247	LINC00674	chr17:66111654:+;chr17:66111680:+	-
chr15:43712497-43712707:mpeak_26783|chr15_43699768_43802707_TP53BP1_NM_-|	179.016	3.40836	1.70208	2.00247	0.0452345	0.321156	18.7874	0	0.787339	0	0	0	462.169	787.88	436.973	134.003	157.441	150.15	1.74047	Inf	1.93369	Inf	TP53BP1	-	-
chr3:128984388-128984446:mpeak_56059|chr3_128968452_128996136_COPG1_NM_+|	245.954	3.84794	1.46737	2.62234	0.00873285	0.133664	18.7874	0	7.08605	0	0	0	561.116	794.626	962.915	211.533	235.139	160.244	1.67382	Inf	1.93372	Inf	COPG1	-	-
chr20:50244179-50244229:mpeak_49906|chr20_50217886_50384950_ATP9A_NM_-|	284.204	2.79453	0.886326	3.15294	0.00161635	0.0528689	15.0299	4.04733	13.3848	0	2.04469	1.26176	708.91	616.543	672.387	540.797	408.938	427.106	1.62485	3.2954	0.53708	2.75832	ATP9A	-	-
chr9:116130972-116131035:mpeak_80402|chr9_116111811_116131895_BSPRY_NM_+|	262.712	1.77748	0.795776	2.23364	0.0255068	0.231001	2.50498	6.74555	13.3848	3.82865	5.11172	0.63088	480.957	406.082	506.259	632.684	650.211	444.14	1.62458	1.24179	-0.309794	1.55159	BSPRY	chr9:116131032:+	chr9_113368749_+
chr17:1451582-1451633:mpeak_32571|chr17_1423832_1466110_PITPNA_NM_-|	256.964	1.94597	0.79507	2.44755	0.0143832	0.172149	3.75747	6.74555	14.1721	5.74298	0	1.26176	449.644	493.774	589.717	519.739	534.686	464.328	1.60945	1.81665	0.0135974	1.80306	PITPNA	-	-
chr5:170819913-170819981:mpeak_65949|chr5_170814707_170837530_NPM1_NM_+|	1568.1	1.0551	0.387339	2.72397	0.00645017	0.113095	45.0897	37.7751	55.9011	25.8434	26.581	22.0808	3206.38	2891.14	2795.84	2938.49	2946.4	3825.66	1.56033	0.89724	-0.126824	1.02406	NPM1	-	-
chr3:128345569-128345628:mpeak_56001|chr3_128339436_128369719_RPN1_NM_-|	551.596	3.56201	1.81436	1.96323	0.0496189	0.335769	21.2923	0	0	0	1.02234	0	1371.48	1280.31	1688.84	796.359	568.424	891.434	1.47161	4.38038	0.943997	3.43638	RPN1	-	-
chr17:4448544-4448601:mpeak_32813|chr17_4443262_4458681_MYBBP1A_NM_-|	117.693	2.76453	1.34425	2.05656	0.0397284	0.299193	11.2724	1.34911	3.93669	0	0	0	331.91	419.573	414.928	88.059	67.4747	73.813	1.41959	Inf	2.34647	Inf	MYBBP1A	-	-
chr9:140156153-140156218:mpeak_81530|chr9_140149758_140167233_NELFB_NM_+|	370.154	5.50126	1.40333	3.92016	8.84894e-05	0.0120007	11.2724	0	9.44807	0	0	0	613.721	553.135	1055.03	649.913	867.971	681.351	1.39884	Inf	0.0147856	Inf	NELFB	-	-
chr16:69796246-69796302:mpeak_31526|chr16_69796186_69973743_WWP2_NM_+|	329.947	2.23183	1.05536	2.11476	0.0344507	0.274413	13.7774	0	7.87339	0.957163	0	1.89264	720.182	617.893	990.472	548.454	668.613	389.253	1.3947	2.92549	0.53567	2.38982	WWP2	-	-
chr16:84096247-84096321:mpeak_32033|chr16_84088250_84150548_MBTPS1_NM_-|	292.692	2.45697	0.961994	2.55403	0.0106483	0.145239	6.26246	0	8.66073	2.87149	0	0.63088	562.369	613.845	467.679	534.097	727.909	587.981	1.36169	2.09115	-0.170399	2.26155	MBTPS1	chr16:84096218:-;chr16:84096251:-	chr16_84062616_-;chr16_84062666_-
chr10:71989033-71989118:mpeak_10122|chr10_71962942_71993190_PPA1_NM_-|	406.841	1.75014	0.611555	2.86179	0.00421255	0.0881495	8.76744	9.44377	10.2354	0	6.13407	4.41616	756.505	732.567	654.279	870.061	977.361	852.32	1.3272	1.43098	-0.332954	1.76394	PPA1	chr10:71989035:-	chr10_70229264_-
chr2:102469102-102469152:mpeak_44764|chr2_102314164_102507627_MAP4K4_NM_+|	281.545	5.15886	1.50743	3.42229	0.00062095	0.0319386	1.25249	0	13.3848	0	0	0	516.026	450.603	698.37	562.812	528.552	607.538	1.31867	Inf	-0.0290813	Inf	MAP4K4	-	-
chr7:99007647-99007719:mpeak_73113|chr7_99006600_99017013_BUD31_NM_+|	411.892	3.89362	0.985023	3.95282	7.72349e-05	0.0113225	2.50498	16.1893	7.87339	1.91433	0	0.63088	656.305	666.461	696.795	913.133	1021.32	959.569	1.31552	3.38382	-0.519036	3.90285	BUD31	-	-
chr2:136742966-136743025:mpeak_45594|chr2_136664977_136743254_DARS_NM_-|	425.1	1.84675	0.850624	2.17105	0.0299271	0.253266	5.00996	5.39644	22.8328	3.82865	5.11172	0.63088	908.056	856.685	902.29	807.845	907.842	675.673	1.2463	1.79611	0.157403	1.6387	DARS	-	-
chr8:38697726-38697785:mpeak_75593|chr8_38585703_38705472_TACC1_NM_+|	311.458	1.64351	0.769617	2.13549	0.0327208	0.26563	2.50498	12.142	8.66073	2.87149	0	3.78528	645.033	624.638	606.251	730.315	650.211	451.08	1.24247	1.80791	0.0344907	1.77342	TACC1	-	chr8_38840243_+
chr5:95108355-95108405:mpeak_63895|chr5_95066849_95128762_RHOBTB3_NM_+|	276.029	2.78713	0.945411	2.94807	0.00319768	0.07695	5.00996	5.39644	7.08605	2.87149	1.02234	0	382.01	600.354	443.272	471.881	744.267	649.176	1.22699	2.16747	-0.387821	2.55529	RHOBTB3	chr5:95108406:+	chr5_95772701_+
chr1:155144652-155144702:mpeak_5404|chr1_155142036_155145804_KRTCAP2_NM_-|	492.011	4.79846	1.56022	3.0755	0.0021015	0.0616277	0	0	12.5974	0	0	0	939.368	1028.02	1113.3	947.591	1068.35	794.909	1.22675	Inf	0.132246	Inf	KRTCAP2	-	-
chr8:140897255-140897306:mpeak_77843|chr8_140743471_141468678_TRAPPC9_NM_-|	186.477	3.38519	1.38188	2.44971	0.0142972	0.172149	11.2724	6.74555	1.57468	0	0	0	425.847	553.135	769.23	165.589	168.687	135.639	1.12072	Inf	1.89541	Inf	TRAPPC9	chr8:140897241:-	-
chr19:11170427-11170568:mpeak_39129|chr19_11071597_11172459_SMARCA4_NM_+|	473.357	2.78607	1.17699	2.36711	0.0179275	0.193273	23.7973	5.39644	20.4708	1.91433	0	0	1208.65	1752.49	1617.19	330.221	402.804	317.333	1.08477	4.69731	2.12394	2.57337	SMARCA4	-	chr19_11059803_+;chr19_11059876_+
chr5:1522777-1522827:mpeak_61994|chr5_1463950_1524076_LPCAT1_NM_-|	276.817	2.9064	1.33225	2.18156	0.0291418	0.251097	0	1.34911	11.0227	0.957163	1.02234	0	574.893	435.763	725.926	477.624	452.899	640.344	1.06864	2.64385	0.14469	2.49916	LPCAT1	-	-
chr17:8110169-8110296:mpeak_33156|chr17_8108362_8113944_AURKB_NM_-|	934.693	5.17838	2.5245	2.05125	0.040243	0.300618	18.7874	0	0	0	0	0	1551.84	1115.71	3178.49	1842.54	1764.57	1744.38	0.964108	Inf	0.127519	Inf	AURKB	chr17:8110177:-	-
chr10:70733329-70733432:mpeak_10036|chr10_70715878_70742298_DDX21_NM_+|	1098.41	1.36246	0.675961	2.01558	0.0438436	0.316972	33.8173	21.5858	14.9594	7.6573	10.2234	3.1544	2205.64	3475.31	1817.97	1835.84	2231.78	1522.95	0.938302	1.742	0.423688	1.31832	DDX21	-	chr10_68973656_+
chr1:1500051-1500220:mpeak_104|chr1_1477547_1510262_SSU72_NM_-|	543.259	1.99756	0.837995	2.38374	0.0171376	0.188824	7.51495	0	11.0227	0	4.08938	1.89264	1070.88	934.933	1006.22	1240.48	1279.98	962.093	0.923182	1.63176	-0.209407	1.84116	SSU72	chr1:1500025:-;chr1:1500052:-;chr1:1500126:-;chr1:1500158:-;chr1:1500187:-	chr1_1564624_-;chr1_1564648_-;chr1_1564808_-
chr8:17411236-17411290:mpeak_74980|chr8_17354596_17422458_SLC7A2_NM_+|	300.004	3.55147	1.37117	2.59011	0.00959458	0.141076	8.76744	8.09466	3.93669	0.957163	0	0	923.086	623.289	781.827	620.241	257.631	372.219	0.893341	4.44159	0.897183	3.54441	SLC7A2	-	-
chr10:27415661-27415721:mpeak_9162|chr10_27401049_27443349_YME1L1_NM_-|	483.594	1.59007	0.767277	2.07235	0.0382324	0.292739	12.5249	10.7929	3.93669	5.74298	1.02234	1.26176	1148.53	1075.24	829.068	1072.98	795.384	846.642	0.892758	1.76355	0.169199	1.59435	YME1L1	-	chr10_27126759_-
chr4:39829729-39829779:mpeak_59112|chr4_39827108_39979576_PDS5A_NM_-|	291.942	3.97371	1.39447	2.84962	0.0043772	0.0903102	7.51495	1.34911	7.08605	0.957163	0	0	422.09	983.501	462.168	501.553	612.384	504.704	0.85397	4.05866	0.206524	3.85213	PDS5A	chr4:39829728:-	-
chr14:64908600-64908658:mpeak_24536|chr14_64854758_64926476_MTHFD1_NM_+|	386.841	3.33388	1.4272	2.33595	0.0194937	0.203011	15.0299	0	6.29871	0	0	0	839.169	1717.42	1226.67	268.006	294.435	275.064	0.845644	Inf	2.17546	Inf	MTHFD1	chr14:64908651:+	chr14_64441932_+
chr9:5803066-5803124:mpeak_78367|chr9_5787308_5833081_ERMP1_NM_-|	414.659	3.92379	1.47428	2.6615	0.00777944	0.127012	0	2.69822	14.9594	0	0	0	1013.27	1276.26	1339.26	483.367	395.647	450.449	0.729899	Inf	1.44864	Inf	ERMP1	chr9:5803071:-	chr9_5803073_-
chr2:232573702-232573838:mpeak_47861|chr2_232573234_232577513_PTMA_NM_+|	1600.47	1.18707	0.59293	2.00204	0.0452802	0.321156	20.0399	13.4911	11.8101	8.61446	23.5139	9.46321	2355.94	1616.23	2261.24	5114.12	4135.38	3635.76	0.727388	0.124526	-1.04763	1.17216	PTMA	-	-
chr5:10430071-10430160:mpeak_62143|chr5_10353750_10433705_MARCH6_NM_+|	671.125	2.95341	0.882422	3.34694	0.000817089	0.0350672	13.7774	5.39644	13.3848	3.82865	0	0	1352.69	1670.2	1477.05	1081.59	1366.87	1068.71	0.723535	3.08813	0.355485	2.73265	MARCH6	-	-
chr5:72201320-72201413:mpeak_63332|chr5_72112417_72204535_TNPO1_NM_+|	1156.06	1.38384	0.70383	1.96616	0.0492805	0.335745	8.76744	26.9822	21.2581	0.957163	10.2234	3.78528	2647.77	2468.87	3192.66	2123.94	1902.58	1464.9	0.686072	1.92948	0.597544	1.33194	TNPO1	chr5:72201387:+	chr5_72905507_+;chr5_72905543_+;chr5_72905579_+
chr17:40485924-40486073:mpeak_34592|chr17_40467818_40540513_STAT3_NM_-|	575.213	2.88107	1.19772	2.40547	0.0161517	0.182908	11.2724	6.74555	14.9594	1.91433	0	0	1474.18	1281.65	2270.69	625.027	790.272	425.844	0.656068	4.10657	1.44896	2.65761	STAT3	-	-
chr16:2823774-2823831:mpeak_29299|chr16_2822103_2827297_TCEB2_NM_-|	662.386	5.0383	1.35119	3.72877	0.000192414	0.0186041	13.7774	0	4.72403	0	0	0	1298.83	1323.48	1684.12	1228.04	1173.65	1222.02	0.644436	Inf	0.249026	Inf	TCEB2	-	-
chr8:48797169-48797224:mpeak_75806|chr8_48686938_48872743_PRKDC_NM_-|	306.001	3.90663	1.34701	2.90023	0.00372892	0.0831969	1.25249	6.74555	8.66073	0	0	0	903.046	1025.32	680.261	378.079	261.72	406.918	0.638602	Inf	1.31742	Inf	PRKDC	chr8:48797174:-	chr8_47884614_-
chr3:156261546-156261666:mpeak_56917|chr3_156261058_156272989_SSR3_NM_-|	1083.4	1.65598	0.58576	2.82707	0.00469762	0.0944853	10.0199	10.7929	12.5974	0.957163	9.2011	5.04704	1603.19	2007.48	1792.77	2180.42	2687.74	2680.61	0.618315	1.13571	-0.482365	1.61808	SSR3	chr3:156261551:-;chr3:156261613:-	chr3_156543764_-;chr3_156543826_-
chr19:16675825-16675909:mpeak_39549|chr19_16664720_16683193_SLC35E1_NM_-|	569.975	2.36713	0.893697	2.6487	0.00808032	0.129017	6.26246	2.69822	8.66073	4.78581	0	0	1285.06	800.022	1040.86	1216.55	1274.86	1199.93	0.563715	1.88049	-0.239859	2.12035	SLC35E1	chr19:16675825:-	chr19_16565016_-
chr12:110770983-110771095:mpeak_20048|chr12_110719031_110784005_ATP2A2_NM_+|	869.064	4.33341	1.45809	2.97198	0.00295887	0.0735678	13.7774	0	15.7468	0	0	0	1747.23	3272.94	2920.24	604.927	857.747	996.16	0.557733	Inf	1.69124	Inf	ATP2A2	-	-
chr9:86292569-86292619:mpeak_79344|chr9_86276854_86323168_UBQLN1_NM_-|	617.12	4.7426	1.33575	3.55051	0.000384489	0.0244405	0	6.74555	7.87339	0	0	0	1095.93	1585.2	1403.04	956.205	1159.34	1191.1	0.536912	Inf	0.304675	Inf	UBQLN1	chr9:86292568:-	chr9_83677654_-
chr15:42511794-42511849:mpeak_26668|chr15_42503947_42565782_TMEM87A_NM_-|	436.355	3.83705	1.34794	2.84661	0.00441878	0.0904976	2.50498	2.69822	11.0227	0.957163	0	0	779.05	1138.65	1105.42	610.67	838.323	746.962	0.536728	4.08339	0.461191	3.6222	TMEM87A	-	-
chr7:99696123-99696281:mpeak_73184|chr7_99690756_99699563_MCM7_NM_-|	862.588	2.92256	1.19475	2.44616	0.0144386	0.172472	20.0399	4.04733	16.5341	1.91433	0	0	1936.35	2555.21	3386.34	800.188	914.998	715.418	0.515636	4.40733	1.6965	2.71083	MCM7	-	-
chr19:16204479-16204549:mpeak_39497|chr19_16178316_16212073_TPM4_NM_+|	1067.96	2.74903	0.850733	3.23136	0.00123202	0.0448722	13.7774	4.04733	9.44807	0.957163	1.02234	3.1544	2318.36	1169.68	1877.8	2960.5	2590.62	1866.14	0.508267	2.40933	-0.467083	2.87642	TPM4	-	chr19_16093721_+
chr1:153603907-153603968:mpeak_5224|chr1_153591514_153606568_S100A13_NM_-|	1032.41	3.14518	1.07777	2.91823	0.0035203	0.0801344	12.5249	0	6.29871	0.957163	0	1.26176	2293.31	1405.77	2076.21	2358.45	1873.96	2360.12	0.4889	3.08461	-0.190937	3.27555	S100A13	chr1:153603914:-	chr1_153631439_-;chr1_153631486_-
chr12:54646212-54646264:mpeak_18156|chr12_54635689_54673915_CBX5_NM_-|	1401.21	3.28984	1.09482	3.00491	0.00265656	0.0691302	0	8.09466	13.3848	3.82865	0	0	2790.55	1903.59	2030.55	3858.32	3113.04	3093.21	0.479117	2.48805	-0.581745	3.06979	CBX5	chr12:54646210:-	chr12_54252413_-
chr2:219093453-219093578:mpeak_47476|chr2_219081816_219118613_ARPC2_NM_+|	1287.12	1.59504	0.638944	2.49637	0.0125473	0.157878	20.0399	5.39644	11.8101	1.91433	4.08938	4.41616	2424.82	2988.28	2839.14	2111.5	2717.39	2316.59	0.451348	1.83776	0.207755	1.63001	ARPC2	-	chr2_218228765_+;chr2_218228820_+
chr20:55776641-55776813:mpeak_50064|chr20_55746164_55841707_BMP7_NM_-|	2371.23	1.35274	0.595143	2.27297	0.0230278	0.22216	16.2824	14.8402	31.4936	10.5288	9.2011	5.67792	5647.48	3363.33	5316.9	5392.65	4379.72	4266.64	0.437028	1.30126	0.0293658	1.2719	BMP7	chr20:55776667:-	chr20_57201708_-
chr10:12118954-12119089:mpeak_8702|chr10_12110915_12162785_DHTKD1_NM_+|	1130.39	2.12296	1.05017	2.02154	0.0432244	0.31452	0	8.09466	12.5974	0.957163	0	1.89264	2855.68	1934.62	3446.97	2097.14	1683.8	1522.95	0.376801	2.86014	0.635116	2.22503	DHTKD1	-	-
chr18:3263122-3263172:mpeak_37128|chr18_3262110_3277762_MYL12B_NM_+|	1771.92	5.06413	1.64983	3.06949	0.00214425	0.0620085	0	0	12.5974	0	0	0	2606.43	4989.01	2439.96	2852.34	3462.68	4900.05	0.376589	Inf	-0.16034	Inf	MYL12B	-	-
chr16:8999037-8999116:mpeak_29580|chr16_8987961_9057341_USP7_NM_-|	845.779	2.16935	1.07772	2.01291	0.0441238	0.317778	0	4.04733	11.0227	2.87149	0	0	1806.09	2004.78	2221.87	1345.77	1375.05	1377.84	0.374707	2.39182	0.557659	1.83416	USP7	-	-
chr9:117354823-117354920:mpeak_80448|chr9_117349993_117359849_ATP6V1G1_NM_+|	2210.51	1.75208	0.610655	2.86918	0.00411539	0.0880578	18.7874	14.8402	9.44807	6.70014	4.08938	5.04704	3083.63	4651.73	3913.86	3965.52	6096.24	4756.21	0.369773	1.44361	-0.347114	1.79073	ATP6V1G1	-	chr9_114592602_+;chr9_114592623_+
chr14:75618774-75618853:mpeak_25124|chr14_75601709_75643349_TMED10_NM_-|	1991.67	1.61452	0.772994	2.08865	0.036739	0.284865	12.5249	14.8402	9.44807	12.4431	0	1.89264	3044.81	4145.82	3806.78	4020.08	4475.82	4355.6	0.334744	1.3606	-0.224774	1.58538	TMED10	-	-
chr5:179044985-179045066:mpeak_66321|chr5_179041960_179050722_HNRNPH1_NM_-mpeak_66321|chr5_179041960_179050722_HNRNPH1_NM_-||	1174.47	3.45969	1.15894	2.98523	0.00283367	0.0720501	3.75747	13.4911	8.66073	1.91433	0	0	2215.66	3071.92	2898.19	1591.76	2216.44	2071.81	0.316516	3.75856	0.477299	3.28126	HNRNPH1	-	chr5_179618051_-
chr6:7556286-7556338:mpeak_66676|chr6_7541869_7582874_DSP_NM_+|	1221.44	2.77117	1.24171	2.23173	0.0256327	0.231519	10.0199	0	6.29871	0	0	1.26176	2494.96	4085.11	2227.38	1942.08	1911.78	1978.44	0.277923	3.69301	0.594657	3.09835	DSP	chr6:7556337:+	chr6_7556103_+
chr14:69377794-69377850:mpeak_24753|chr14_69341734_69446083_ACTN1_NM_-|	1501.71	2.20255	0.922406	2.38783	0.0169482	0.187824	13.7774	4.04733	15.7468	2.87149	1.02234	0	3081.13	4125.58	5201.95	1923.9	1809.55	1840.91	0.270549	3.10797	1.15447	1.95351	ACTN1	chr14:69377797:-	chr14_68911082_-
chr1:117121908-117121959:mpeak_4234|chr1_117120184_117210377_IGSF3_NM_-|	1026.87	4.04038	1.31699	3.0679	0.00215567	0.0620724	3.75747	2.69822	8.66073	0	0	0	2406.04	2443.24	3529.64	1360.13	1306.56	1261.76	0.18041	Inf	1.0928	Inf	IGSF3	chr1:117121907:-	chr1_116579286_-
chr19:8527405-8527461:mpeak_38948|chr19_8509711_8553574_HNRNPM_NM_+mpeak_38948|chr19_8509711_8553574_HNRNPM_NM_+||	1433.85	2.60686	1.19148	2.18791	0.028676	0.248736	7.51495	4.04733	9.44807	0.957163	1.02234	0	2633.99	5248.04	3802.85	1484.56	2071.27	1942.48	0.179808	3.40789	1.08758	2.3203	HNRNPM	-	chr19_8462571_+
chr2:1646970-1647093:mpeak_41933|chr2_1638095_1748319_PXDN_NM_-|	1296.45	2.64837	1.34164	1.97397	0.048385	0.333211	11.2724	1.34911	3.93669	0.957163	0	0	3721.15	3689.82	4072.12	1654.93	1413.9	987.959	0.144197	4.11264	1.5011	2.61154	PXDN	chr2:1647006:-	chr2_1643237_-
chr1:156715117-156715221:mpeak_5649|chr1_156713247_156722240_HDGF_NM_-|	3062.48	1.38939	0.708246	1.96173	0.0497943	0.336156	11.2724	4.04733	11.8101	6.70014	0	2.52352	5657.5	5871.33	8251.31	5606.1	5531.91	5795.27	0.137157	1.55647	0.224192	1.33228	HDGF	-	chr1_156745347_-;chr1_156745374_-
chr6:44217447-44217579:mpeak_68218|chr6_44213902_44221225_HSP90AB1_NM_+|	17777.9	2.26262	1.02677	2.20363	0.0275504	0.241397	16.2824	2.69822	14.1721	0	0	1.89264	43209.7	59949.1	55761.7	16678.6	21206.5	16493.7	0.0208612	4.13065	1.54719	2.58346	HSP90AB1	-	chr6_44249743_+;chr6_44249760_+
chr13:41808016-41808067:mpeak_21943|chr13_41791364_41837713_MTRF1_NM_-|	4.16779	3.80479	2.31456	1.64385	0.100207	0.483827	0	9.44377	0	4.78581	9.2011	6.93969	0	0	0	2.87149	9.2011	7.57057	#DIV/0!	-1.1479	-Inf	Inf	MTRF1	-	-
chr7:64466442-64466540:mpeak_72294|chr7_64453792_64467124_ERV3-1_NM_-|	4.73876	3.304	1.83017	1.8053	0.0710279	0.408899	0	6.74555	3.93669	11.486	6.13407	11.9867	0	0	0	2.87149	6.13407	7.57057	#DIV/0!	-1.47071	-Inf	Inf	ERV3-1	chr7:64466462:-;chr7:64466496:-	chr7_65006072_-
chr19:15378220-15378361:mpeak_39464|chr19_15349256_15391262_BRD4_NM_-|	5.17156	3.22617	2.0395	1.58184	0.113685	0.517788	2.50498	6.74555	6.29871	19.1433	7.15641	8.20145	0	0	0	1.91433	0	10.0941	#DIV/0!	-1.1498	-Inf	Inf	BRD4	-	-
chr3:40488028-40488088:mpeak_53937|chr3_40434060_40494799_ENTPD3-AS1_NR_-|	9.4699	3.03225	1.65888	1.82789	0.0675655	0.395934	7.51495	1.34911	18.1088	29.672	19.4245	24.6043	0	0	0	3.82865	4.08938	5.04704	#DIV/0!	-1.45017	-Inf	Inf	ENTPD3-AS1	chr3:40487995:-;chr3:40488033:-	chr3_40446546_-
chr10:21959862-21959942:mpeak_9016|chr10_21823100_22030867_MLLT10_NM_+|	2.38312	1.61319	2.2968	0.702364	0.482452	0.889083	1.25249	1.34911	0	1.91433	3.06703	9.46321	0	0	0	3.82865	2.04469	5.67792	#DIV/0!	-2.47305	-Inf	Inf	MLLT10	chr10:21959943:+	chr10_21671013_+
chr1:93687244-93687306:mpeak_3264|chr1_93646272_93744019_CCDC18_NM_+|	2.58875	1.43723	2.89722	0.496071	0.619845	0.945727	0	2.69822	0	6.70014	6.13407	4.41616	0	0	0	0	1.02234	10.0941	#DIV/0!	-2.67655	-Inf	Inf	CCDC18	-	chr1_93221737_+
chr8:86049789-86049867:mpeak_76491|chr8_86019322_86057623_LRRCC1_NM_+|	3.14806	0.63624	2.15458	0.295296	0.767768	0.981941	1.25249	0	0	6.70014	4.08938	9.46321	0	0	0	3.82865	6.13407	6.3088	#DIV/0!	-4.01524	-Inf	Inf	LRRCC1	-	chr8_85137598_+
chr14:50050245-50050394:mpeak_23869|chr14_50044571_50053134_RPS29_NM_-|	6027.31	0.544124	0.786669	0.691682	0.489137	0.890559	7632.68	12710	9973.22	11623.8	13306.8	16967.5	1.25249	16.1893	19.6835	12.4431	35.7821	28.3896	81658.3	-0.466813	-1.04522	0.578408	RPS29	chr14:50050262:-;chr14:50050297:-;chr14:50050323:-	chr14_49583528_-;chr14_49583577_-;chr14_49583609_-;chr14_49583638_-
chr3:169201280-169201804:mpeak_57176|chr3_168802831_169381563_MECOM_NM_-|	2640.46	-0.779171	0.830272	-0.938453	0.348012	0.812409	5672.53	4064.87	4410.67	7220.83	5401.05	4848.32	15.0299	22.9349	2.36202	6.70014	5.11172	15.1411	35083.6	-0.30429	0.581293	-0.885583	MECOM	chr3:169201402:-;chr3:169201586:-	chr3_169483809_-
chr11:68522345-68522467:mpeak_14517|chr11_68522319_68609399_CPT1A_NM_-|	1357.56	-0.0648119	0.635619	-0.101967	0.918783	0.994055	3676.06	4193.03	4275.25	1440.53	1504.89	1096.47	13.7774	33.7278	32.2809	1.91433	10.2234	12.6176	15221.1	1.58718	1.68839	-0.101212	CPT1A	chr11:68522354:-;chr11:68522403:-;chr11:68522436:-	chr11_68754887_-;chr11_68754940_-
chr1:109618534-109618616:mpeak_3691|chr1_109607315_109618624_TAF13_NM_-|	429.34	0.642763	0.978231	0.657067	0.511138	0.902838	1044.58	512.662	520.431	1197.41	803.563	1007.52	10.0199	9.44377	1.57468	22.0147	2.04469	20.8191	9875.62	-0.534072	-1.093	0.558928	TAF13	-	chr1_109075916_-;chr1_109075940_-
chr5:1628808-1628879:mpeak_62004|chr5_1599942_1634120_LOC728613_NR_-|	52.6673	1.42446	1.02211	1.39364	0.163426	0.603379	95.1893	101.183	81.8832	88.059	165.62	82.6453	1.25249	0	2.36202	2.87149	7.15641	3.78528	5132.2	-0.27344	-1.93417	1.66073	LOC728613	chr5:1628813:-	chr5_1628699_-
chr13:34411508-34411648:mpeak_21762|chr13_34392205_34540223_RFC3_NM_+|	88.5963	1.06147	0.905919	1.1717	0.241317	0.722531	177.854	225.301	137.784	143.574	175.843	181.063	2.50498	5.39644	0	4.78581	7.15641	1.89264	4564.07	0.112154	-0.808124	0.920278	RFC3	chr13:34411582:+;chr13:34411633:+	chr13_33837466_+;chr13_33837499_+
chr15:101812382-101812559:mpeak_28960|chr15_101811850_101817725_VIMP_NM_-|	298.927	0.990343	0.853996	1.15966	0.246188	0.728557	315.628	1079.29	569.246	339.793	589.893	584.195	6.26246	29.6804	7.87339	16.2718	22.4916	26.497	4482.72	0.375662	-0.574739	0.950402	VIMP	chr15:101812400:-;chr15:101812452:-;chr15:101812483:-	chr15_101272179_-;chr15_101272256_-;chr15_101272292_-
chr3:30720327-30720390:mpeak_53628|chr3_30647993_30732911_TGFBR2_NM_+|	142.41	-0.206395	0.940816	-0.219378	0.826355	0.99092	265.528	314.343	444.059	234.505	221.849	191.157	5.00996	18.8875	0.787339	2.87149	6.13407	3.78528	4148.01	0.661142	0.948515	-0.287373	TGFBR2	-	-
chr4:109546303-109546423:mpeak_60545|chr4_109541721_109551176_RPL34_NM_+|	2647.53	0.150038	0.507384	0.295709	0.767452	0.981941	3644.75	7795.16	4868.12	4472.82	4624.06	5534.71	122.744	188.875	105.503	111.988	153.352	148.257	3909.64	0.156494	0.0122484	0.144246	RPL34	chr4:109546353:+;chr4:109546382:+;chr4:109546412:+;chr4:109546452:+	chr4_108625259_+;chr4_108625316_+
chr21:47609035-47609189:mpeak_51349|chr21_47608735_47648738_LSS_NM_-|	83.2369	0.231693	0.763045	0.303643	0.7614	0.981941	154.056	280.615	299.976	59.3441	84.8546	85.7997	11.2724	6.74555	7.08605	2.87149	3.06703	3.1544	2926.41	1.67543	1.4651	0.210326	LSS	chr21:47609045:-;chr21:47609104:-	chr21_46189132_-;chr21_46189194_-
chr2:204055718-204055787:mpeak_47128|chr2_203879601_204081975_NBEAL1_NM_+|	158.339	-1.57608	1.10885	-1.42136	0.155211	0.591521	370.737	161.893	281.867	461.352	272.966	324.273	11.2724	8.09466	0	3.82865	0	3.78528	2803.72	-0.378162	1.34689	-1.72506	NBEAL1	-	-
chr4:76837865-76838011:mpeak_59754|chr4_76832506_76862166_NAAA_NM_-|	76.5344	0.924509	0.79097	1.16883	0.242472	0.723839	180.359	118.722	151.169	128.26	146.195	145.103	7.51495	1.34911	7.87339	5.74298	20.4469	5.67792	2690.07	0.101856	-0.92902	1.03088	NAAA	-	chr4_75916696_-;chr4_75916822_-
chr14:93406064-93406270:mpeak_25601|chr14_93404871_93582263_ITPK1_NM_-|	100.953	-0.306506	0.985304	-0.311078	0.755742	0.981532	216.681	205.065	225.179	192.39	172.776	170.969	0	1.34911	14.9594	1.91433	5.11172	5.04704	2644.52	0.271003	0.433833	-0.16283	ITPK1	chr14:93406062:-;chr14:93406109:-;chr14:93406207:-	chr14_92939754_-;chr14_92939863_-;chr14_92939906_-
chr7:132719829-132720115:mpeak_74020|chr7_132470421_132766828_CHCHD3_NM_-|	735.018	0.471596	0.787125	0.599137	0.549081	0.92054	2267.01	802.721	2115.58	1564	647.144	1054.2	36.3222	121.42	40.1543	59.3441	51.1172	61.1954	2620.21	0.667193	0.205219	0.461973	CHCHD3	chr7:132719789:-;chr7:132719967:-;chr7:132720017:-;chr7:132720106:-	chr7_133035027_-;chr7_133035267_-
chr15:101815452-101815568:mpeak_28962|chr15_101811850_101817725_VIMP_NM_-|	174.111	0.765454	0.648183	1.18092	0.237633	0.717372	382.01	334.579	316.51	299.592	351.687	295.883	6.26246	29.6804	7.87339	16.2718	22.4916	26.497	2357.8	0.125297	-0.574739	0.700036	VIMP	-	chr15_101275305_-
chr20:43126055-43126204:mpeak_49396|chr20_43124996_43150726_SERINC3_NM_-|	71.6073	-1.54717	0.98421	-1.57199	0.115953	0.521513	83.9169	232.047	156.68	80.4017	116.547	163.398	6.26246	2.69822	11.8101	0.957163	2.04469	2.52352	2275.53	0.391368	1.91041	-1.51904	SERINC3	chr20:43126082:-;chr20:43126107:-;chr20:43126155:-	chr20_44497394_-;chr20_44497445_-;chr20_44497537_-
chr17:57075532-57075809:mpeak_35458|chr17_57060282_57184266_TRIM37_NM_-|	626.404	0.502271	0.622969	0.806254	0.420096	0.861663	920.581	1393.63	818.045	1132.32	1476.27	1384.78	17.5349	78.2484	44.091	76.573	80.7652	94.0012	2239.34	-0.350405	-0.845507	0.495102	TRIM37	chr17:57075528:-;chr17:57075563:-;chr17:57075700:-	chr17_58998172_-;chr17_58998206_-;chr17_58998235_-;chr17_58998338_-;chr17_58998374_-
chr10:79796930-79797056:mpeak_10452|chr10_79793517_79814288_RPS24_NM_+|	122.116	-2.40777	1.26372	-1.9053	0.056741	0.362046	415.827	175.384	111.802	338.836	183	214.499	0	12.142	9.44807	3.82865	0	0.63088	2170.79	-0.0668091	2.2754	-2.34221	RPS24	chr10:79797020:+;chr10:79797055:+	chr10_78037234_+;chr10_78037298_+
chr17:7158169-7158247:mpeak_33005|chr17_7155371_7161906_ELP5_NM_+|	292.482	0.113875	0.479786	0.237345	0.812389	0.988479	630.003	468.141	708.605	555.154	536.731	448.556	37.5747	29.6804	18.1088	22.9719	29.648	24.6043	2116.52	0.230053	0.144573	0.0854793	ELP5	chr17:7158170:+;chr17:7158232:+	chr17_7254905_+
chr13:34395269-34395417:mpeak_21757|chr13_34392205_34540223_RFC3_NM_+|	42.5241	0.854337	1.06209	0.804389	0.421172	0.861663	108.967	43.1715	85.0326	113.902	75.6535	61.8263	2.50498	5.39644	0	4.78581	7.15641	1.89264	2001.08	-0.0839554	-0.808124	0.724169	RFC3	-	chr13_33821193_+;chr13_33821236_+
chr1:6931967-6932115:mpeak_306|chr1_6845383_6947713_CAMTA1_NR_+mpeak_306|chr1_6845383_7826518_CAMTA1_NM_+||	68.756	0.81302	0.875452	0.928686	0.353052	0.816637	61.3721	199.668	73.2225	88.059	157.441	186.11	3.75747	8.09466	6.29871	7.6573	16.3575	17.0338	1841.58	-0.368744	-1.1773	0.808552	CAMTA1	chr1:6932023:+;chr1:6932080:+;chr1:6932109:+	chr1_6871981_+;chr1_6872045_+
chr3:195966419-195966622:mpeak_57976|chr3_195965765_196014584_PCYT1A_NM_-|	83.2248	0.29891	0.658712	0.45378	0.649987	0.957673	191.631	97.1359	175.577	179.947	134.949	160.244	12.5249	9.44377	4.72403	12.4431	11.2458	8.83233	1739.59	-0.0331589	-0.284936	0.251777	PCYT1A	chr3:195966418:-	-
chr9:33348626-33348730:mpeak_78695|chr9_33290417_33369903_NFX1_NM_+|	14.9468	1.64899	1.50492	1.09573	0.273196	0.751258	15.0299	6.74555	32.2809	32.5435	33.7374	44.1616	0	1.34911	0.787339	2.87149	1.02234	8.83233	1686.8	-1.03076	-2.57451	1.54375	NFX1	chr9:33348725:+	chr9_33348641_+;chr9_33348690_+;chr9_33348741_+
chr10:102741126-102741214:mpeak_11251|chr10_102739129_102747276_MRPL43_NM_-|	11.3408	2.61286	1.55163	1.68395	0.0921909	0.467191	28.8073	28.3313	3.14936	21.0576	22.4916	15.772	1.25249	1.34911	0	7.6573	3.06703	3.1544	1544.89	0.023323	-2.4154	2.43873	MRPL43	chr10:102741133:-	chr10_100981377_-
chr2:27667108-27667170:mpeak_42640|chr2_27665232_27669167_KRTCAP3_NM_+|	161.029	0.111938	0.538415	0.207903	0.835305	0.991589	325.648	226.651	481.064	270.877	240.251	263.077	26.3023	20.2367	22.8328	15.3146	17.3799	22.7117	1489.6	0.416558	0.324303	0.0922554	KRTCAP3	chr2:27667164:+	chr2_27444296_+
chr2:136268281-136268345:mpeak_45547|chr2_135958010_136288806_ZRANB3_NM_-|	37.1161	-0.0097425	0.963188	-0.0101149	0.99193	0.998503	125.249	39.1242	86.6073	67.9585	36.8044	60.5645	5.00996	10.7929	2.36202	3.82865	2.04469	5.04704	1381.68	0.602249	0.734127	-0.131878	ZRANB3	-	-
chr12:42835701-42835770:mpeak_17381|chr12_42719946_42840393_PPHLN1_NM_+|	211.411	-0.377953	0.61575	-0.61381	0.539341	0.916925	314.375	499.171	417.29	283.32	534.686	331.843	22.5448	40.4733	27.5569	31.5864	21.4692	12.6176	1358.91	0.0981931	0.463808	-0.365615	PPHLN1	chr12:42835758:+	chr12_42441922_+;chr12_42441955_+;chr12_42442015_+
chr5:169010828-169010901:mpeak_65917|chr5_169010637_169031063_SPDL1_NM_+|	291.21	-0.669908	0.985593	-0.6797	0.496694	0.894927	423.342	218.556	207.07	877.718	985.54	599.967	6.26246	47.2189	11.8101	11.486	44.9832	60.5645	1300.28	-1.53677	-0.841958	-0.694808	SPDL1	-	chr5_169583889_+
chr10:43622861-43623013:mpeak_9525|chr10_43572516_43623559_RET_NM_+|	254.658	-0.210438	0.570152	-0.369091	0.71206	0.975264	483.462	377.751	821.982	356.064	338.396	463.066	40.0797	36.426	58.2631	18.1861	30.6703	31.544	1248.95	0.540156	0.745211	-0.205055	RET	chr10:43622916:+;chr10:43622952:+;chr10:43622988:+	chr10_43127464_+;chr10_43127504_+
chr1:154235884-154235986:mpeak_5320|chr1_154192647_154243356_UBAP2L_NM_+|	390.945	-0.572697	0.455747	-1.25661	0.208894	0.674445	756.505	1149.44	1063.69	469.01	516.284	413.858	61.3721	98.4851	84.2453	26.8006	32.715	18.9264	1216.56	1.08574	1.63779	-0.552051	UBAP2L	chr1:154235933:+;chr1:154235980:+	chr1_154263433_+;chr1_154263502_+
chr17:57165545-57165768:mpeak_35487|chr17_57060282_57184266_TRIM37_NM_-|	337.975	0.538473	0.630346	0.854251	0.392966	0.843556	727.697	481.632	424.376	778.173	572.513	680.089	17.5349	78.2484	44.091	76.573	80.7652	94.0012	1167.98	-0.313883	-0.845507	0.531624	TRIM37	-	-
chr2:142186844-142187117:mpeak_45651|chr2_140990895_142889270_LRP1B_NM_-|	42.7814	1.31981	1.49138	0.884961	0.376178	0.829471	103.957	111.976	117.313	33.5007	74.6312	51.1013	10.0199	0	0	0	2.04469	8.83233	1108.61	1.06545	-0.11841	1.18386	LRP1B	-	chr2_141429264_-;chr2_141429335_-;chr2_141429458_-
chr20:43127284-43127447:mpeak_49399|chr20_43124996_43150726_SERINC3_NM_-|	38.3746	-1.82043	0.981567	-1.85462	0.0636511	0.384658	106.462	40.4733	78.7339	90.9304	50.0949	67.5042	6.26246	2.69822	11.8101	0.957163	2.04469	2.52352	1086.47	0.113956	1.91041	-1.79645	SERINC3	-	chr20_44498704_-
chr2:232209855-232209919:mpeak_47835|chr2_232063259_232236223_ARMC9_NM_+|	27.4661	-1.37917	1.34244	-1.02736	0.30425	0.778889	73.897	80.9466	65.3491	28.7149	27.6033	36.5911	0	1.34911	12.5974	1.91433	0	0.63088	1052.56	1.24487	2.45405	-1.20918	ARMC9	chr2:232209911:+	chr2_231345195_+
chr8:124115541-124115594:mpeak_77512|chr8_124084919_124164045_TBC1D31_NM_+|	4.74932	4.04512	2.872	1.40847	0.158992	0.597151	0	21.5858	6.29871	0.957163	4.08938	11.3558	0	1.34911	0	0	0	11.3558	1033.44	0.765556	-3.07336	3.83891	TBC1D31	chr8:124115592:+	chr8_123103351_+
chr1:111690259-111690428:mpeak_3850|chr1_111682248_111726812_CEPT1_NM_+|	399.19	-0.692193	0.627126	-1.10375	0.2697	0.74803	832.907	566.626	908.589	876.761	609.317	641.605	37.5747	122.769	65.3491	58.3869	38.8491	31.544	1022.68	0.117436	0.809452	-0.692016	CEPT1	-	chr1_111147687_+;chr1_111147738_+
chr6:131907868-131908025:mpeak_69759|chr6_131895435_131949379_MED23_NM_-|	34.1801	-1.23384	1.09659	-1.12516	0.260522	0.739882	92.6843	137.609	59.8377	26.8006	24.5363	36.5911	3.75747	9.44377	15.7468	0	0	3.1544	1002.25	1.72231	3.19803	-1.47571	MED23	chr6:131907861:-;chr6:131907891:-;chr6:131907917:-;chr6:131907975:-	chr6_131586733_-;chr6_131586785_-;chr6_131586836_-
chr7:76648290-76648348:mpeak_72689|chr7_76610138_76652910_DTX2P1-UPK3BP1-PMS2P11_NR_+|	29.2284	0.940876	0.859405	1.0948	0.273604	0.751597	45.0897	29.6804	83.4579	65.0871	38.8491	44.7925	5.00996	5.39644	5.51137	10.5288	4.08938	13.2485	994.033	0.0893224	-0.807901	0.897223	DTX2P1-UPK3BP1-PMS2P11	chr7:76648345:+	-
chr7:138819397-138819541:mpeak_74177|chr7_138818489_138874066_TTC26_NM_+|	184.48	-1.4382	0.902875	-1.59291	0.111181	0.514164	288.073	192.923	413.353	465.181	475.39	244.151	12.5249	67.4555	11.0227	16.2718	12.2681	15.1411	982.766	-0.405639	1.05891	-1.46455	TTC26	-	-
chr3:44816379-44816429:mpeak_54084|chr3_44803208_44894164_KIF15_NM_+|	9.76442	1.92043	1.46206	1.31351	0.18901	0.647457	23.7973	8.09466	29.1315	18.1861	14.3128	3.78528	1.25249	2.69822	2.36202	0	4.08938	9.46321	966.674	0.750024	-1.10223	1.85226	KIF15	-	-
chr19:36815805-36815969:mpeak_40305|chr19_36804224_36822620_LINC00665_NR_-|	42.4255	0.0214401	0.614194	0.0349077	0.972153	0.998423	91.4319	62.0591	70.0732	67.0014	80.7652	87.6924	6.26246	8.09466	9.44807	10.5288	8.17876	7.57057	939.14	-0.0747874	-0.142586	0.0677985	LINC00665	chr19:36815809:-	chr19_36324910_-;chr19_36324946_-;chr19_36324959_-;chr19_36325017_-
chr14:31789281-31789383:mpeak_23511|chr14_31762818_31889788_HEATR5A_NM_-|	162.44	-0.57919	0.504518	-1.14801	0.250966	0.728974	309.365	254.982	391.307	245.034	266.832	317.964	26.3023	45.8698	31.4936	27.7577	15.3352	17.0338	921.863	0.203675	0.785861	-0.582186	HEATR5A	chr14:31789323:-	-
chr14:50146191-50146435:mpeak_23888|chr14_50110388_50155098_POLE2_NM_-|	37.0525	0.61602	0.748197	0.82334	0.410315	0.855396	47.5947	95.7868	53.539	46.901	77.6982	70.0277	6.26246	10.7929	4.72403	8.61446	8.17876	14.5103	904.161	0.0169025	-0.52336	0.540263	POLE2	chr14:50146190:-;chr14:50146246:-;chr14:50146283:-;chr14:50146339:-	chr14_49679474_-;chr14_49679545_-
chr9:131591375-131591449:mpeak_81012|chr9_131585112_131592100_C9orf114_NM_-|	389.968	0.0286671	0.496049	0.0577908	0.953915	0.997153	759.01	487.029	814.896	871.018	643.055	611.954	103.957	51.2662	84.2453	95.7163	89.9663	67.5042	860.63	-0.0448614	-0.080368	0.0355066	C9orf114	-	chr9_128829111_-
chr3:157920913-157921043:mpeak_56961|chr3_157827840_158261971_RSRC1_NM_+|	162.246	-1.02157	0.588219	-1.73672	0.0824369	0.442598	290.578	159.195	171.64	437.423	389.513	351.4	12.5249	26.9822	36.2176	22.0147	20.4469	29.0205	820.621	-0.923128	0.0831813	-1.00631	RSRC1	-	chr3_158203191_+
chr12:122468634-122468696:mpeak_20694|chr12_122459791_122496997_BCL7A_NM_+|	193.219	0.153912	0.609886	0.252361	0.800762	0.986125	283.063	207.763	348.004	491.024	408.938	313.548	27.5548	43.1715	32.2809	34.4579	39.8714	88.9541	814.341	-0.532736	-0.664633	0.131897	BCL7A	chr12:122468687:+	chr12_122030781_+
chr12:114259856-114259919:mpeak_20291|chr12_114255991_114404176_RBM19_NM_-|	36.2344	-0.490371	0.9079	-0.540115	0.589117	0.937972	78.9069	82.2957	88.9693	68.9157	46.0055	40.3764	0	13.4911	7.08605	1.91433	3.06703	3.78528	810.517	0.687885	1.23095	-0.543062	RBM19	chr12:114259862:-	chr12_113822058_-
chr8:124116372-124116442:mpeak_77513|chr8_124084919_124164045_TBC1D31_NM_+|	3.66409	4.42147	2.8194	1.56823	0.116827	0.524442	0	17.5384	3.93669	1.91433	4.08938	3.78528	0	1.34911	0	0	0	11.3558	795.9	1.13344	-3.07336	4.20679	TBC1D31	chr8:124116441:+	chr8_123104207_+
chr2:233433864-233433931:mpeak_47889|chr2_233415296_233445613_EIF4E2_NM_+|	361.788	-0.257548	0.42609	-0.604444	0.545548	0.919132	592.428	489.727	591.291	800.188	795.384	612.585	56.3621	70.1537	91.3313	57.4298	98.1451	86.4306	768.175	-0.40002	-0.151723	-0.248297	EIF4E2	chr2:233433886:+;chr2:233433920:+	chr2_232569209_+
chr3:196014396-196014538:mpeak_57981|chr3_195965765_196014584_PCYT1A_NM_-|	38.4334	0.355339	0.772485	0.459995	0.64552	0.955607	102.704	51.2662	49.6023	95.7163	49.0725	53.6248	12.5249	9.44377	4.72403	12.4431	11.2458	8.83233	762.653	0.0370337	-0.284936	0.321969	PCYT1A	-	-
chr7:5390915-5390982:mpeak_71056|chr7_5347943_5463177_TNRC18_NM_-mpeak_71056|chr7_5347943_5463177_TNRC18_NM_-||	257.722	-1.19584	0.849869	-1.40709	0.159402	0.597359	587.418	491.076	692.071	280.449	378.268	372.85	27.5548	134.911	70.0732	6.70014	15.3352	35.9602	761.406	0.779373	2.00346	-1.22409	TNRC18	chr7:5390919:-;chr7:5390944:-	chr7_5351329_-
chr1:154207079-154207278:mpeak_5316|chr1_154192647_154243356_UBAP2L_NM_+|	230.46	-0.357068	0.566226	-0.630611	0.528295	0.911329	754	380.449	600.74	318.735	213.67	175.385	61.3721	98.4851	84.2453	26.8006	32.715	18.9264	710.845	1.2937	1.63779	-0.344089	UBAP2L	-	chr1_154234659_+
chr8:144362966-144363069:mpeak_77962|chr8_144362685_144363870_LINC01604_NR_-|	21.6606	-0.539795	1.0608	-0.508854	0.610854	0.942766	12.5249	31.0295	27.5569	46.901	81.7876	40.3764	1.25249	0	5.51137	5.74298	4.08938	3.1544	700.894	-1.24943	-0.941122	-0.308304	LINC01604	chr8:144362951:-;chr8:144362998:-	chr8_143280783_-;chr8_143280828_-;chr8_143280885_-
chr7:77035378-77035429:mpeak_72701|chr7_76940766_77045717_GSAP_NM_-|	9.04547	2.01921	1.59244	1.268	0.204797	0.670408	15.0299	1.34911	9.44807	23.9291	26.581	18.2955	1.25249	0	0	4.78581	4.08938	3.78528	687.352	-1.41364	-3.33746	1.92382	GSAP	-	-
chr1:24975347-24975529:mpeak_1086|chr1_24969593_24998672_SRRM1_NM_+|	216.826	-0.151145	0.651821	-0.231881	0.81663	0.98887	434.614	447.905	485.001	315.864	296.48	302.192	35.0698	125.467	40.1543	30.6292	36.8044	51.7322	681.405	0.580451	0.752008	-0.171557	SRRM1	-	chr1_24648870_+
chr11:64543985-64544111:mpeak_14059|chr11_64532990_64546316_SF1_NR_-mpeak_14059|chr11_64533627_64546316_SF1_NM_-||	9.61922	0.634595	1.53276	0.414022	0.678858	0.964494	36.3222	2.69822	3.14936	22.0147	14.3128	18.2955	2.50498	1.34911	2.36202	3.82865	1.02234	7.57057	678.396	-0.3733	-0.998763	0.625462	SF1	-	chr11_64776478_-
chr7:5028684-5028815:mpeak_71022|chr7_5013615_5036240_RNF216P1_NR_+|	32.1921	1.01694	1.2226	0.831788	0.405528	0.853852	98.9468	52.6153	26.7695	51.6868	59.296	48.5778	16.2824	1.34911	0	11.486	9.2011	10.0941	674.292	0.160458	-0.803892	0.96435	RNF216P1	-	chr7_4989112_+
chr1:1327660-1327761:mpeak_79|chr1_1322962_1334718_CCNL2_NM_-|	34.8983	0.659067	1.00983	0.652652	0.513981	0.903919	38.8272	76.8993	25.1948	36.3722	75.6535	97.1556	7.51495	12.142	1.57468	20.1004	7.15641	20.1882	663.733	-0.569863	-1.16004	0.590178	CCNL2	chr1:1327673:-	chr1_1392223_-;chr1_1392284_-
chr2:191799962-191800023:mpeak_46747|chr2_191745546_191827555_GLS_NM_+|	103.255	0.515756	0.599919	0.85971	0.389949	0.842275	176.601	298.153	190.536	103.374	181.977	104.095	27.5548	44.5206	29.1315	20.1004	24.5363	38.4837	657.356	0.772561	0.284034	0.488526	GLS	chr2:191799979:+;chr2:191800015:+	chr2_190935288_+
chr1:114248374-114248444:mpeak_4000|chr1_114240347_114301777_PHTF1_NM_-|	45.7498	0.352004	1.27527	0.276023	0.78253	0.982625	48.8472	136.26	77.1592	78.4873	74.6312	78.2292	0	24.284	2.36202	10.5288	3.06703	15.1411	656.175	0.180971	-0.108988	0.289959	PHTF1	chr1:114248387:-	chr1_113705766_-
chr1:109289305-109289413:mpeak_3631|chr1_109289284_109351404_STXBP3_NM_+|	118.931	-0.190575	0.575409	-0.331199	0.740494	0.978885	225.448	161.893	181.875	228.762	208.558	235.949	15.0299	33.7278	41.729	35.415	18.4022	40.3764	629.062	-0.242206	-0.0579243	-0.184281	STXBP3	-	chr1_108746783_+
chr8:133806740-133806833:mpeak_77792|chr8_133787603_133858025_PHF20L1_NM_+|	29.653	0.198189	1.17305	0.168951	0.865835	0.991807	63.877	6.74555	24.4075	98.5878	77.6982	46.6852	0	5.39644	4.72403	5.74298	11.2458	10.725	625.992	-1.2304	-1.45332	0.222924	PHF20L1	-	-
chr9:5092352-5092413:mpeak_78331|chr9_4985244_5126683_JAK2_NM_+|	103.165	-0.240334	0.671672	-0.357815	0.720482	0.97626	137.774	137.609	92.906	214.404	249.452	252.352	17.5349	33.7278	7.87339	19.1433	39.8714	35.3293	622.783	-0.959541	-0.673894	-0.285647	JAK2	chr9:5092410:+	-
chr3:195997318-195997424:mpeak_57980|chr3_195965765_196014584_PCYT1A_NM_-|	34.7736	0.0736486	0.784711	0.0938545	0.925225	0.994192	88.9269	35.0769	40.1543	80.4017	46.0055	67.5042	12.5249	9.44377	4.72403	12.4431	11.2458	8.83233	614.992	-0.240312	-0.284936	0.0446235	PCYT1A	-	chr3_196270500_-
chr11:118888667-118888808:mpeak_15796|chr11_118886468_118889057_RPS25_NM_-|	583.184	-0.026905	0.558148	-0.048204	0.961554	0.99799	1394.02	698.839	697.582	1424.26	1020.3	777.876	140.279	152.449	169.278	120.602	176.866	225.855	603.984	-0.207656	-0.17979	-0.027866	RPS25	chr11:118888668:-;chr11:118888711:-	chr11_119018033_-
chr1:6885147-6885239:mpeak_305|chr1_6845383_6947713_CAMTA1_NR_+mpeak_305|chr1_6845383_7826518_CAMTA1_NM_+||	10.4531	1.47673	1.82526	0.809054	NA	NA	0	0	36.2176	12.4431	3.06703	14.5103	3.75747	8.09466	6.29871	7.6573	16.3575	17.0338	598.61	0.270747	-1.1773	1.44804	CAMTA1	-	chr1_6825138_+;chr1_6825178_+
chr5:68608775-68608838:mpeak_63183|chr5_68578861_68628620_CCDC125_NM_-|	108.282	1.02375	0.552248	1.85378	0.0637707	0.385009	194.136	183.479	164.554	168.461	117.57	206.929	18.7874	39.1242	34.6429	73.7015	36.8044	61.1954	585.784	0.137275	-0.891527	1.0288	CCDC125	chr5:68608783:-	chr5_69312957_-;chr5_69312990_-
chr1:226175589-226175860:mpeak_7763|chr1_226173224_226187066_SDE2_NM_-|	19.7211	1.08632	0.685073	1.5857	0.112806	0.51742	32.5648	36.426	44.091	28.7149	22.4916	25.8661	6.26246	6.74555	6.29871	7.6573	8.17876	11.3558	585.712	0.553077	-0.494074	1.04715	SDE2	-	chr1_225987977_-;chr1_225988083_-
chr20:25280830-25280921:mpeak_48851|chr20_25275666_25371618_ABHD12_NM_-|	132.039	0.612314	0.46954	1.30407	0.192209	0.652117	229.206	238.793	247.224	268.006	160.508	159.613	31.3123	39.1242	53.539	51.6868	48.0502	57.4101	576.906	0.282266	-0.34206	0.624327	ABHD12	chr20:25280850:-;chr20:25280918:-	chr20_25300214_-
chr8:133816060-133816236:mpeak_77796|chr8_133787603_133858025_PHF20L1_NM_+|	30.9003	-0.0732848	0.798483	-0.09178	0.926873	0.994192	37.5747	21.5858	28.3442	93.8019	79.7429	71.9204	0	5.39644	4.72403	5.74298	11.2458	10.725	576.42	-1.48809	-1.45332	-0.0347618	PHF20L1	-	-
chr8:124089609-124089727:mpeak_77508|chr8_124084919_124164045_TBC1D31_NM_+|	7.2456	2.12574	2.26027	0.94048	0.346971	0.811793	5.00996	16.1893	1.57468	16.2718	19.4245	15.772	0	1.34911	0	0	0	11.3558	562.691	-1.1763	-3.07336	1.89706	TBC1D31	chr8:124089720:+	chr8_123077479_+
chr14:20923439-20923597:mpeak_23095|chr14_20923289_20925149_APEX1_NM_+|	254.753	-0.459468	0.827488	-0.555256	0.578719	0.932052	626.246	273.869	410.991	646.085	379.29	309.131	40.0797	157.846	39.3669	42.1152	53.1619	78.8601	552.527	-0.0255217	0.446443	-0.471965	APEX1	-	-
chr2:136102688-136102763:mpeak_45544|chr2_135958010_136288806_ZRANB3_NM_-|	18.4622	-0.649522	0.94601	-0.686591	0.49234	0.893205	18.7874	43.1715	33.0682	30.6292	24.5363	42.269	5.00996	10.7929	2.36202	3.82865	2.04469	5.04704	523.137	-0.0360928	0.734127	-0.77022	ZRANB3	chr2:136102691:-	chr2_135345118_-
chr3:62301472-62301543:mpeak_54736|chr3_62249817_62304622_PTPRG-AS1_NR_-|	42.0399	0.768194	0.645599	1.18989	0.234088	0.713223	52.6046	74.2011	60.6251	55.5154	80.7652	75.7057	18.7874	9.44377	7.87339	18.1861	33.7374	17.0338	519.134	-0.177613	-0.933522	0.755909	PTPRG-AS1	chr3:62301484:-	-
chr18:29992607-29993044:mpeak_37676|chr18_29848731_30050447_GAREM_NM_-|	130.245	0.326081	0.902465	0.361322	0.717858	0.97626	296.84	102.532	216.518	320.649	171.754	172.861	41.3322	6.74555	70.8605	54.5583	52.1396	56.1484	517.824	-0.111253	-0.453297	0.342044	GAREM	chr18:29992953:-	-
chr7:104717397-104717650:mpeak_73434|chr7_104654636_104752271_KMT2E_NM_+|	11.0891	1.27607	2.0835	0.612466	0.54023	0.916925	16.2824	13.4911	0	25.8434	13.2905	27.1279	5.00996	0	0.787339	0	25.5586	5.67792	513.575	-1.15415	-2.42978	1.27563	KMT2E	-	chr7_105077016_+;chr7_105077041_+;chr7_105077095_+;chr7_105077118_+
chr10:13629100-13629184:mpeak_8790|chr10_13628938_13672259_PRPF18_NM_+|	135.007	-0.535893	0.808138	-0.663121	0.507253	0.900659	298.093	149.751	136.997	276.62	288.301	247.936	13.7774	78.2484	22.0455	27.7577	43.9608	36.5911	512.698	-0.474957	0.0747746	-0.549732	PRPF18	-	-
chr15:101814821-101814892:mpeak_28961|chr15_101811850_101817725_VIMP_NM_-|	40.8761	1.1194	0.763805	1.46556	0.142767	0.572259	100.199	55.3135	67.7111	48.8153	50.0949	59.3028	6.26246	29.6804	7.87339	16.2718	22.4916	26.497	509.454	0.496624	-0.574739	1.07136	VIMP	-	chr15_101274605_-
chr2:136268963-136269110:mpeak_45548|chr2_135958010_136288806_ZRANB3_NM_-|	14.8138	0.0410833	1.4557	0.0282224	0.977485	0.998503	66.382	9.44377	16.5341	44.0295	4.08938	8.20145	5.00996	10.7929	2.36202	3.82865	2.04469	5.04704	508.454	0.713612	0.734127	-0.0205153	ZRANB3	-	-
chr7:72891180-72891490:mpeak_72477|chr7_72856023_72936615_BAZ1B_NM_-|	219.102	-0.0807814	0.564917	-0.142997	0.886293	0.993485	397.04	628.685	305.487	289.063	308.748	273.171	63.877	138.958	61.4124	56.4726	55.2066	51.1013	503.774	0.612025	0.698964	-0.0869382	BAZ1B	-	chr7_73476899_-;chr7_73477013_-;chr7_73477083_-
chr21:48069735-48069942:mpeak_51414|chr21_48055506_48084206_PRMT2_NM_+|	885.11	0.167635	0.384283	0.436228	0.662671	0.961934	1395.28	1179.12	1090.46	1895.18	1777.86	1405.6	279.306	172.686	281.08	419.237	398.714	326.796	499.932	-0.470684	-0.643004	0.17232	PRMT2	chr21:48069800:+;chr21:48069855:+;chr21:48069941:+	chr21_46649887_+;chr21_46649940_+
chr9:126163829-126163924:mpeak_80693|chr9_126144904_126692417_DENND1A_NM_-|	80.3883	0.75704	0.835436	0.906162	0.36485	0.824598	112.724	129.515	118.101	92.8448	170.732	128.069	22.5448	9.44377	41.729	52.6439	70.5418	15.772	488.811	-0.120189	-0.914566	0.794376	DENND1A	chr9:126163826:-;chr9:126163868:-	chr9_123401590_-
chr4:100480304-100480498:mpeak_60263|chr4_100470513_100485214_TRMT10A_NM_-|	18.6001	0.96715	1.08688	0.889842	0.373551	0.828774	37.5747	36.426	33.0682	18.1861	25.5586	23.9735	2.50498	18.8875	0.787339	7.6573	12.2681	6.3088	482.73	0.660925	-0.2422	0.903126	TRMT10A	-	-
chrX:101409707-101409772:mpeak_83171|chrX_101409274_101410986_BEX5_NM_-|	67.4545	-0.568071	0.707114	-0.803366	0.421763	0.861663	118.987	68.8046	99.992	115.817	186.067	104.095	11.2724	33.7278	14.9594	10.5288	22.4916	22.7117	479.962	-0.496421	0.105483	-0.601904	BEX5	chrX:101409712:-	chrX_102154743_-;chrX_102154768_-
chr19:48962564-48962666:mpeak_41086|chr19_48958963_48967437_KCNJ14_NM_+|	5.28534	3.37602	2.06323	1.63628	0.101781	0.486727	6.26246	0	12.5974	1.91433	2.04469	9.46321	1.25249	2.69822	0	15.3146	11.2458	0.63088	477.379	0.490697	-2.78296	3.27366	KCNJ14	-	-
chr20:9149560-9149620:mpeak_48557|chr20_9049700_9459567_PLCB4_NM_+|	50.1231	-0.359267	1.2962	-0.27717	0.78165	0.982625	127.754	32.3786	11.0227	178.032	39.8714	121.129	27.5548	5.39644	3.14936	22.9719	13.2905	18.9264	474.107	-0.986117	-0.612353	-0.373764	PLCB4	-	chr20_9168966_+
chr3:9799001-9799094:mpeak_53036|chr3_9791627_9807492_OGG1_NM_+|	89.4278	-0.222854	0.496981	-0.448415	0.653853	0.958963	126.502	99.8342	190.536	168.461	163.575	146.995	33.8173	25.6331	29.9189	35.415	26.581	25.8661	466.46	-0.200515	0.0245376	-0.225053	OGG1	chr3:9799091:+	chr3_9757403_+
chr7:87229423-87229519:mpeak_72831|chr7_87133765_87342639_ABCB1_NM_-|	17.6336	0.850259	1.92016	0.442807	0.657905	0.959543	17.5349	13.4911	82.6706	54.5583	4.08938	5.67792	0	1.34911	14.9594	14.3574	1.02234	1.89264	464.773	0.821724	-0.0828424	0.904567	ABCB1	-	-
chr2:114201424-114201627:mpeak_45097|chr2_114195267_114253213_CBWD2_NM_+|	79.3649	1.01694	0.922512	1.10236	0.270304	0.748331	30.0598	263.077	78.7339	78.4873	120.637	149.519	31.3123	28.3313	20.4708	37.3293	58.2736	56.1484	464.174	0.0930499	-0.921576	1.01463	CBWD2	-	-
chr8:95423339-95423499:mpeak_76726|chr8_95384615_95487343_RAD54B_NM_-|	17.0727	0.189976	1.15603	0.164334	0.869468	0.991868	48.8472	33.7278	4.72403	17.2289	25.5586	36.5911	6.26246	9.44377	3.14936	9.57163	4.08938	5.67792	462.987	0.137214	-0.0365161	0.17373	RAD54B	-	-
chr11:880799-880982:mpeak_12342|chr11_869956_915058_CHID1_NM_-|	1117.24	-0.363535	0.440807	-0.824702	0.409541	0.855389	1976.43	1436.8	1873.87	2252.2	2008.91	1641.55	430.857	319.739	435.398	463.267	331.24	236.58	445.795	-0.158889	0.201932	-0.360821	CHID1	chr11:880819:-;chr11:880874:-	chr11_880830_-;chr11_880874_-
chr15:30064259-30064347:mpeak_26298|chr15_29993893_30261002_TJP1_NM_-|	207.142	-0.625695	0.896509	-0.697924	0.485225	0.889083	440.877	505.916	352.728	277.577	267.854	227.117	25.0498	221.254	52.7517	23.9291	43.9608	46.6852	434.542	0.750283	1.38412	-0.633838	TJP1	-	chr15_29772088_-
chr10:128821460-128821527:mpeak_12097|chr10_128593977_129249595_DOCK1_NM_+|	13.4492	-0.699841	1.21495	-0.576027	0.564597	0.926511	20.0399	21.5858	3.93669	45.9438	18.4022	27.1279	2.50498	2.69822	5.51137	0.957163	5.11172	7.57057	425.237	-1.00552	-0.348211	-0.657307	DOCK1	-	chr10_127023208_+
chr5:162898412-162898478:mpeak_65853|chr5_162887516_162918117_HMMR_NM_+|	17.6681	2.51205	1.29292	1.94293	0.0520248	0.342997	38.8272	6.74555	3.14936	25.8434	27.6033	28.3896	0	5.39644	2.36202	17.2289	25.5586	30.9131	418.658	-0.748164	-3.24784	2.49967	HMMR	-	-
chr2:46844376-46844442:mpeak_43216|chr2_46844310_46851301_CRIPT_NM_+|	237.257	-0.012024	0.521748	-0.0230455	0.981614	0.998503	488.472	276.568	326.746	477.624	348.62	377.267	71.392	116.023	77.1592	65.0871	94.0557	128.069	412.657	-0.14056	-0.118438	-0.0221214	CRIPT	chr2:46844441:+	chr2_46617292_+
chr7:102959966-102960138:mpeak_73395|chr7_102953090_102985320_DNAJC2_NM_-|	22.3898	2.22172	1.26122	1.76157	0.0781418	0.430163	28.8073	10.7929	0.787339	27.7577	40.8938	33.4367	1.25249	5.39644	3.14936	22.9719	34.7597	58.6719	412.19	-1.33783	-3.57046	2.23263	DNAJC2	-	chr7_103319649_-
chr2:27434586-27434651:mpeak_42595|chr2_27422705_27435175_SLC5A6_NR_-mpeak_42595|chr2_27423447_27435175_SLC5A6_NM_-||	26.4148	1.78518	1.39641	1.2784	0.201107	0.667352	73.897	33.7278	58.2631	31.5864	6.13407	22.0808	22.5448	1.34911	16.5341	42.1152	3.06703	5.67792	410.328	1.47196	-0.331177	1.80314	SLC5A6	-	-
chr7:25164812-25164883:mpeak_71500|chr7_25163468_25164980_CYCS_NM_-|	1714.43	0.349622	0.582693	0.60001	0.548499	0.920413	3856.42	1454.34	2414.77	3392.18	1591.79	3357.55	604.953	748.756	543.264	809.76	891.485	907.837	407.256	-0.110677	-0.459842	0.349166	CYCS	chr7:25164819:-	chr7_25125223_-;chr7_25125247_-
chr3:136455413-136455797:mpeak_56355|chr3_136057119_136471245_STAG1_NM_-|	42.1094	1.16146	0.624914	1.85859	0.0630848	0.382253	67.6345	40.4733	54.3264	67.9585	65.4301	63.7189	7.51495	22.9349	9.44807	35.415	43.9608	26.497	407.125	-0.279127	-1.40795	1.12882	STAG1	-	chr3_136736723_-;chr3_136736849_-
chr21:48055598-48055740:mpeak_51411|chr21_48055506_48084206_PRMT2_NM_+|	898.67	-0.354277	0.526066	-0.673444	0.500665	0.896063	1392.77	652.969	929.847	2548.92	1979.26	1402.45	279.306	172.686	281.08	419.237	398.714	326.796	405.907	-0.995011	-0.643004	-0.352008	PRMT2	chr21:48055675:+	chr21_46635761_+
chr8:179981-180058:mpeak_74774|chr8_163710_182318_RPL23AP53_NR_-|	5.71461	2.05228	1.35124	1.51881	0.12881	0.545101	3.75747	13.4911	13.3848	6.70014	7.15641	1.26176	1.25249	4.04733	2.36202	3.82865	8.17876	3.1544	399.817	1.01881	-0.984679	2.00348	RPL23AP53	chr8:179979:-;chr8:180006:-	chr8_230008_-
chr6:133593963-133594124:mpeak_69801|chr6_133562494_133849862_EYA4_NM_+|	9.26374	0.580206	1.94762	0.297905	0.765776	0.981941	32.5648	2.69822	3.93669	41.158	6.13407	5.67792	2.50498	4.04733	0	0	6.13407	6.3088	398.838	-0.434333	-0.925243	0.49091	EYA4	-	-
chr4:76837714-76837794:mpeak_59753|chr4_76832506_76862166_NAAA_NM_-|	15.2433	0.820842	1.02019	0.804594	0.421054	0.861663	20.0399	17.5384	28.3442	17.2289	34.7597	16.4029	7.51495	1.34911	7.87339	5.74298	20.4469	5.67792	393.862	-0.0530471	-0.92902	0.875973	NAAA	chr4:76837721:-	chr4_75916566_-
chr1:114269030-114269126:mpeak_4009|chr1_114240347_114301777_PHTF1_NM_-|	31.9149	0.0458765	1.25464	0.0365654	0.970831	0.998392	61.3721	56.6626	38.5796	63.1727	54.1843	53.6248	0	24.284	2.36202	10.5288	3.06703	15.1411	391.839	-0.126627	-0.108988	-0.0176391	PHTF1	chr1:114269040:-	chr1_113726421_-
chrX:53426495-53426605:mpeak_82465|chrX_53407107_53449677_SMC1A_NM_-|	806.456	0.133895	0.431949	0.309978	0.756578	0.981941	1625.73	2216.59	1936.07	583.869	727.909	574.732	443.382	652.969	385.009	179.947	218.782	132.485	390.073	1.61495	1.47956	0.135388	SMC1A	-	chrX_53399546_-;chrX_53399615_-
chr7:74921845-74921903:mpeak_72603|chr7_74703024_74988276_PMS2P5_NR_-|	32.0332	-0.0925223	0.689547	-0.134178	0.893261	0.994055	46.3422	32.3786	76.3719	67.9585	41.9161	43.5308	11.2724	17.5384	11.0227	12.4431	12.2681	11.3558	389.351	0.0157811	0.143302	-0.127521	PMS2P5	chr7:74921848:-	-
chr5:118809605-118809718:mpeak_64430|chr5_118788137_118877599_HSD17B4_NM_+|	509.827	-0.20449	0.623793	-0.327816	0.74305	0.978885	1392.77	1069.84	1236.91	494.853	357.821	347.615	185.369	535.597	230.69	66.0442	73.6088	126.807	388.746	1.62396	1.83652	-0.212563	HSD17B4	-	chr5_119474015_+
chr17:55351786-55351857:mpeak_35323|chr17_55333930_55756909_MSI2_NM_+|	138.372	-0.49127	0.711124	-0.690836	0.489669	0.890559	270.538	187.526	111.802	263.22	329.195	203.774	23.7973	79.5975	44.091	44.9866	68.4971	33.4367	386.387	-0.482487	0.00554149	-0.488029	MSI2	chr17:55351850:+	chr17_57274485_+
chr20:21136305-21136363:mpeak_48779|chr20_21106623_21227116_KIZ_NM_+|	6.36622	3.04131	2.3975	1.26854	0.204606	0.670408	0	0	27.5569	3.82865	0	0	5.00996	5.39644	11.0227	3.82865	15.3352	4.41616	385.786	2.8475	-0.137988	2.98549	KIZ	chr20:21136366:+	-
chr10:128824640-128824696:mpeak_12098|chr10_128593977_129249595_DOCK1_NM_+|	4.29613	0.350714	2.058	0.170415	0.864684	0.991807	13.7774	0	0	8.61446	1.02234	3.78528	2.50498	2.69822	5.51137	0.957163	5.11172	7.57057	385.757	0.0376945	-0.348211	0.385906	DOCK1	-	-
chr7:74977888-74977946:mpeak_72607|chr7_74703024_74988276_PMS2P5_NR_-|	32.2986	-0.186506	0.737246	-0.252977	0.800286	0.98598	41.3322	26.9822	83.4579	64.1299	40.8938	54.8866	11.2724	17.5384	11.0227	12.4431	12.2681	11.3558	381.016	-0.0753539	0.143302	-0.218656	PMS2P5	chr7:74977891:-	-
chr16:90025717-90025793:mpeak_32439|chr16_90015138_90032268_DEF8_NM_+|	133.686	0.205378	0.499594	0.411089	0.681007	0.964494	205.409	169.988	177.151	218.233	271.944	203.144	32.5648	49.9171	62.9871	49.7725	98.1451	64.9807	379.839	-0.327423	-0.549453	0.22203	DEF8	chr16:90025774:+	chr16_89959311_+
chr2:46072845-46072920:mpeak_43188|chr2_45879042_46411873_PRKCE_NM_+|	14.9734	0.450817	1.21142	0.372139	0.70979	0.974641	27.5548	26.9822	29.9189	14.3574	26.581	23.9735	0	9.44377	5.51137	0	7.15641	8.20145	376.485	0.379716	-0.0383353	0.418051	PRKCE	chr2:46072897:+	chr2_45845757_+
chr15:52527867-52527969:mpeak_27264|chr15_52486251_52587995_MYO5C_NM_-|	213.539	-0.0773916	0.863681	-0.0896067	0.9286	0.994192	338.173	335.928	111.802	454.652	423.251	375.374	62.6246	126.816	19.6835	66.0442	133.927	114.189	375.807	-0.673282	-0.587141	-0.0861401	MYO5C	chr15:52527867:-	-
chr17:57089688-57089815:mpeak_35463|chr17_57060282_57184266_TRIM37_NM_-|	149.632	0.0973625	0.796128	0.122295	0.902665	0.994055	149.046	240.142	133.848	233.548	498.904	148.888	17.5349	78.2484	44.091	76.573	80.7652	94.0012	373.933	-0.752789	-0.845507	0.0927179	TRIM37	-	-
chr7:74949867-74949925:mpeak_72605|chr7_74703024_74988276_PMS2P5_NR_-|	30.8093	-0.0725989	0.644211	-0.112694	0.910273	0.994055	57.6146	28.3313	62.9871	53.6011	43.9608	47.316	11.2724	17.5384	11.0227	12.4431	12.2681	11.3558	373.888	0.0398255	0.143302	-0.103477	PMS2P5	chr7:74949870:-	-
chr8:67514648-67514765:mpeak_76157|chr8_67477060_67525484_MYBL1_NM_-|	9.21077	1.93687	1.90364	1.01745	0.308938	0.783154	8.76744	33.7278	0	20.1004	4.08938	3.78528	7.51495	4.04733	0	5.74298	13.2905	9.46321	367.533	0.603158	-1.30137	1.90453	MYBL1	chr8:67514759:-	chr8_66602511_-
chr16:547394-547452:mpeak_29048|chr16_475667_570725_RAB11FIP3_NM_+|	19.0356	-0.520423	1.23674	-0.420803	0.673899	0.963844	17.5349	18.8875	44.8783	23.9291	56.229	23.9735	1.25249	1.34911	19.6835	5.74298	6.13407	8.83233	364.822	-0.357066	0.105794	-0.46286	RAB11FIP3	chr16:547448:+	chr16_497445_+
chr6:101311933-101312094:mpeak_69192|chr6_100957409_101329248_ASCC3_NM_-|	98.338	-0.26071	0.919846	-0.283427	0.776849	0.982625	199.146	249.585	149.594	99.5449	104.279	136.901	45.0897	107.929	11.0227	13.4003	27.6033	35.9602	364.741	0.812323	1.09181	-0.279484	ASCC3	-	-
chr19:28294259-28294378:mpeak_39999|chr19_28284374_28296512_LOC101927151_NR_+|	12.4741	0.93343	1.66712	0.559905	0.575545	0.931177	21.2923	13.4911	0	14.3574	29.648	25.2352	8.76744	0	0.787339	10.5288	17.3799	8.20145	364.043	-0.993218	-1.91811	0.92489	LOC101927151	chr19:28294344:+;chr19:28294377:+	chr19_27803423_+;chr19_27803468_+
chr7:127975903-127976114:mpeak_73831|chr7_127950984_127983962_RBM28_NM_-|	186.631	0.362957	0.505575	0.71791	0.472813	0.883125	325.648	387.195	527.517	187.604	155.396	144.472	73.897	159.195	107.865	51.6868	49.0725	70.0277	363.787	1.34737	0.997393	0.349974	RBM28	-	chr7_128335953_-;chr7_128335990_-;chr7_128336023_-
chr12:12351822-12351889:mpeak_16658|chr12_12274354_12419811_LRP6_NM_-|	28.2324	0.464042	0.965756	0.480496	0.630875	0.95097	22.5448	55.3135	33.0682	36.3722	38.8491	69.3969	8.76744	20.2367	1.57468	16.2718	14.3128	22.0808	362.757	-0.382643	-0.784325	0.401682	LRP6	chr12:12351826:-	-
chr11:68549318-68549434:mpeak_14522|chr11_68522319_68609399_CPT1A_NM_-|	38.8875	0.25407	1.04549	0.243015	0.807994	0.988249	126.502	45.8698	114.164	45.9438	8.17876	21.4499	13.7774	33.7278	32.2809	1.91433	10.2234	12.6176	359.13	1.92278	1.68839	0.234386	CPT1A	-	-
chr6:30250707-30250760:mpeak_67331|chr6_30202045_30293911_HCG17_NR_-|	5.97942	1.29985	1.83448	0.708564	0.478595	0.885441	16.2824	2.69822	0	7.6573	16.3575	3.1544	0	1.34911	3.93669	6.70014	9.2011	4.41616	359.086	-0.517447	-1.94252	1.42507	HCG17	chr6:30250707:-	chr6_30282933_-
chr1:114291764-114291912:mpeak_4014|chr1_114240347_114301777_PHTF1_NM_-|	41.4446	-0.88453	1.22411	-0.722592	0.469931	0.882644	45.0897	58.0117	40.1543	98.5878	99.1674	100.941	0	24.284	2.36202	10.5288	3.06703	15.1411	358.417	-1.06009	-0.108988	-0.951098	PHTF1	-	chr1_113749253_-
chr1:22047521-22047609:mpeak_926|chr1_22005932_22109688_USP48_NM_-|	146.854	-0.0900595	0.474304	-0.189877	0.849405	0.991589	219.186	256.331	160.617	253.648	280.122	218.285	67.6345	67.4555	42.5163	85.1875	58.2736	52.994	358.171	-0.241508	-0.145516	-0.0959913	USP48	-	-
chr14:35252346-35252451:mpeak_23625|chr14_35222910_35344853_BAZ1A_NM_-|	36.0963	0.13273	1.0457	0.126929	0.898997	0.994055	52.6046	74.2011	22.8328	42.1152	82.8099	60.5645	2.50498	32.3786	7.08605	11.486	22.4916	22.0808	356.54	-0.309857	-0.417582	0.107725	BAZ1A	-	chr14_34783163_-
chr14:74485946-74486000:mpeak_25012|chr14_74433717_74486026_ENTPD5_NM_-|	6.41138	3.08284	2.40292	1.28295	0.199508	0.666477	25.0498	0	0	3.82865	0	0	2.50498	10.7929	7.87339	9.57163	12.2681	5.04704	354.96	2.70989	-0.344792	3.05468	ENTPD5	-	-
chr17:17207360-17207505:mpeak_33430|chr17_17206679_17250118_NT5M_NM_+|	15.7203	0.54698	1.4688	0.3724	0.709595	0.974604	45.0897	20.2367	4.72403	16.2718	30.6703	35.9602	1.25249	12.142	0	7.6573	10.2234	4.41616	348.653	-0.243019	-0.735205	0.492186	NT5M	chr17:17207411:+;chr17:17207453:+;chr17:17207481:+	chr17_17304096_+;chr17_17304160_+
chr16:58230627-58230717:mpeak_31109|chr16_58192257_58231782_CSNK2A2_NM_-|	71.0885	0.276952	0.654116	0.423398	0.672005	0.963844	186.621	80.9466	105.503	97.6306	87.9216	90.2159	15.0299	49.9171	42.5163	35.415	31.6927	29.6514	347.162	0.435995	0.151375	0.284621	CSNK2A2	-	chr16_58196726_-
chr8:143852607-143852672:mpeak_77943|chr8_143846159_143859264_LYNX1_NM_-|	10.0452	1.63959	1.47749	1.10971	0.267124	0.745293	2.50498	20.2367	34.6429	15.3146	16.3575	11.3558	0	0	5.51137	3.82865	5.11172	5.67792	347.068	0.415388	-1.40729	1.82268	LYNX1	chr8:143852620:-	chr8_142771203_-
chr15:64380955-64381055:mpeak_27701|chr15_64365227_64386207_FAM96A_NR_-mpeak_27701|chr15_64367736_64386207_FAM96A_NM_-||	30.5003	-0.49054	1.16467	-0.421183	0.673621	0.963844	40.0797	5.39644	29.1315	104.331	71.5641	69.3969	5.00996	9.44377	0	12.4431	12.2681	6.93969	344.122	-1.7171	-1.13081	-0.586297	FAM96A	-	chr15_64088795_-
chr7:72514984-72515042:mpeak_72454|chr7_72476618_72519597_PMS2P5_NR_+|	30.2871	-0.25072	0.711583	-0.352341	0.724583	0.976442	43.8372	24.284	68.4985	65.0871	42.9385	42.8999	11.2724	17.5384	11.0227	12.4431	12.2681	11.3558	342.976	-0.143671	0.143302	-0.286973	PMS2P5	chr7:72515039:+	-
chr8:124114631-124114751:mpeak_77511|chr8_124084919_124164045_TBC1D31_NM_+|	3.35913	3.32465	2.4619	1.35044	0.176874	0.630138	3.75747	5.39644	4.72403	7.6573	1.02234	5.04704	0	1.34911	0	0	0	11.3558	342.891	0.0158105	-3.07336	3.08917	TBC1D31	chr8:124114632:+;chr8:124114739:+	chr8_123102498_+
chr2:220419800-220420015:mpeak_47593|chr2_220415564_220436268_OBSL1_NM_-|	9.10453	1.6187	1.18203	1.36942	0.170867	0.61633	7.51495	24.284	33.0682	5.74298	3.06703	4.41616	1.25249	10.7929	7.08605	4.78581	4.08938	3.1544	339.061	2.29409	0.669356	1.62474	OBSL1	chr2:220419871:-;chr2:220419959:-	chr2_219555150_-;chr2_219555240_-
chr1:1577702-1577878:mpeak_115|chr1_1571218_1655859_CDK11B_NM_-|	66.8552	0.346978	0.538842	0.643932	0.51962	0.908608	127.754	72.852	118.888	110.074	100.19	73.1821	36.3222	35.0769	22.8328	41.158	36.8044	27.1279	339.051	0.172718	-0.157341	0.330059	CDK11B	-	-
chr17:19835110-19835160:mpeak_33605|chr17_19809545_19881169_AKAP10_NM_-|	11.2657	0.675422	1.20501	0.560513	0.575129	0.931177	15.0299	5.39644	15.7468	36.3722	9.2011	15.1411	7.51495	2.69822	0.787339	9.57163	5.11172	12.6176	328.831	-0.747121	-1.31138	0.56426	AKAP10	-	-
chr17:57125038-57125136:mpeak_35470|chr17_57060282_57184266_TRIM37_NM_-|	121.597	0.44023	0.837632	0.525565	0.599191	0.941107	268.033	60.71	129.911	275.663	151.307	182.324	17.5349	78.2484	44.091	76.573	80.7652	94.0012	327.905	-0.409733	-0.845507	0.435774	TRIM37	-	-
chrX:107782970-107783029:mpeak_83289|chrX_107683073_107939526_COL4A5_NM_+|	12.3588	0.676231	1.12169	0.602869	0.546596	0.919132	35.0698	13.4911	37.7923	5.74298	5.11172	13.2485	8.76744	10.7929	7.08605	0.957163	2.04469	8.20145	324.071	1.84102	1.25002	0.591009	COL4A5	-	-
chr9:88916225-88916519:mpeak_79428|chr9_88903659_88969402_ZCCHC6_NM_-|	19.193	-0.139079	1.0348	-0.134402	0.893085	0.994055	32.5648	31.0295	11.0227	30.6292	28.6256	43.5308	6.26246	2.69822	14.1721	5.74298	5.11172	18.9264	322.56	-0.462061	-0.364459	-0.0976017	ZCCHC6	chr9:88916208:-	chr9_86301532_-
chr18:55283043-55283214:mpeak_38079|chr18_55269015_55289177_NARS_NM_-|	539.94	0.613636	0.327016	1.87647	0.0605906	0.37455	1059.61	1087.38	884.181	593.441	588.871	514.168	264.276	346.721	331.47	310.121	280.122	218.916	321.621	0.837332	0.220019	0.617313	NARS	-	chr18_57615816_-;chr18_57615838_-;chr18_57615858_-;chr18_57615932_-
chr1:114242646-114242767:mpeak_3997|chr1_114240347_114301777_PHTF1_NM_-|	37.0129	-0.865059	1.31097	-0.659861	0.509343	0.901066	41.3322	62.0591	24.4075	59.3441	119.614	82.0145	0	24.284	2.36202	10.5288	3.06703	15.1411	319.745	-1.03003	-0.108988	-0.921038	PHTF1	chr1:114242647:-	chr1_113700028_-
chr6:160170300-160170456:mpeak_70573|chr6_160148029_160176059_WTAP_NM_+|	106.361	-0.629274	0.647276	-0.972188	0.330957	0.798134	150.299	116.023	100.779	218.233	258.653	185.479	21.2923	71.5028	22.0455	40.2008	47.0279	44.7925	319.662	-0.851447	-0.201136	-0.650311	WTAP	chr6:160170356:+;chr6:160170451:+	chr6_159749303_+;chr6_159749318_+;chr6_159749367_+;chr6_159749386_+;chr6_159749423_+;chr6_159749463_+
chr1:89575389-89575558:mpeak_3142|chr1_89573974_89591842_GBP2_NM_-|	16.4607	1.01935	1.08994	0.935241	0.349664	0.812988	27.5548	26.9822	59.0504	11.486	9.2011	8.83233	7.51495	24.284	3.93669	8.61446	8.17876	1.89264	317.855	1.94407	0.935416	1.00865	GBP2	-	chr1_89109824_-
chr22:25047183-25047362:mpeak_51846|chr22_25028881_25048972_BCRP3_NR_+|	16.1061	0.412923	0.858777	0.480827	0.630639	0.95097	31.3123	18.8875	38.5796	15.3146	21.4692	16.4029	7.51495	4.04733	16.5341	4.78581	10.2234	8.20145	315.982	0.739159	0.275595	0.463564	BCRP3	chr22:25047363:+	chr22_24651394_+
chr2:55761013-55761106:mpeak_43418|chr2_55746730_55772042_CFAP36_NM_+|	73.0813	0.102748	0.771594	0.133163	0.894065	0.994055	117.734	107.929	42.5163	127.303	143.128	121.129	15.0299	51.2662	18.8961	27.7577	44.9832	59.3028	314.793	-0.546035	-0.632221	0.086186	CFAP36	chr2:55761096:+	chr2_55533937_+;chr2_55533958_+
chr17:29096660-29096748:mpeak_33985|chr17_29036625_29096889_SUZ12P1_NR_+|	9.26119	1.15847	1.76861	0.655016	0.512458	0.903393	22.5448	0	0	5.74298	11.2458	4.41616	12.5249	6.74555	2.36202	14.3574	12.2681	18.9264	312.653	0.0748542	-1.07432	1.14917	SUZ12P1	chr17:29096747:+	chr17_30769726_+
chr12:48096515-48096632:mpeak_17552|chr12_48057373_48099844_RPAP3_NM_-|	109.216	-1.098	0.724747	-1.51501	0.12977	0.546965	150.299	134.911	76.3719	209.619	270.921	244.151	21.2923	72.852	22.0455	27.7577	50.0949	30.2823	311.199	-1.00304	0.103652	-1.10669	RPAP3	-	chr12_47702756_-
chr5:36986109-36986414:mpeak_62509|chr5_36876860_37063891_NIPBL_NM_+|	75.5629	-0.140977	1.14557	-0.123063	0.902057	0.994055	56.3621	52.6153	6.29871	217.276	175.843	191.788	3.75747	29.6804	3.93669	34.4579	68.4971	66.2424	308.434	-2.34311	-2.17858	-0.164536	NIPBL	-	chr5_36986056_+;chr5_36986093_+
chr5:118464894-118465015:mpeak_64415|chr5_118406781_118582689_DMXL1_NM_+|	6.3832	3.39727	1.80987	1.87707	0.0605082	0.374384	0	12.142	16.5341	4.78581	1.02234	0	5.00996	6.74555	2.36202	2.87149	11.2458	13.8794	304.686	2.3037	-0.987766	3.29146	DMXL1	chr5:118465010:+	chr5_119129314_+
chr1:154207667-154207746:mpeak_5317|chr1_154192647_154243356_UBAP2L_NM_+|	115.71	-0.456771	0.616169	-0.741309	0.458506	0.879107	387.02	144.355	210.219	132.088	100.19	92.1085	61.3721	98.4851	84.2453	26.8006	32.715	18.9264	303.805	1.19291	1.63779	-0.444873	UBAP2L	-	chr1_154235207_+;chr1_154235245_+
chr8:92083347-92083509:mpeak_76654|chr8_92082423_92097011_OTUD6B_NM_+|	47.9503	0.446991	0.841663	0.53108	0.595363	0.939685	93.9368	59.3609	22.0455	97.6306	68.4971	71.2895	25.0498	25.6331	7.08605	40.2008	25.5586	39.1146	303.525	-0.437243	-0.860291	0.423048	OTUD6B	-	chr8_91071178_+
chr19:33579037-33579166:mpeak_40103|chr19_33571785_33621035_GPATCH1_NM_+|	4.75882	1.99408	1.95012	1.02254	0.306524	0.77997	12.5249	6.74555	0	3.82865	6.13407	3.78528	5.00996	1.34911	0	1.91433	13.2905	2.52352	303.039	0.487169	-1.47917	1.96634	GPATCH1	-	-
chr2:38524919-38525040:mpeak_42978|chr2_38523255_38604432_ATL2_NR_-mpeak_42978|chr2_38523732_38604432_ATL2_NM_-||	10.67	0.607093	1.33429	0.454993	0.649114	0.957673	17.5349	17.5384	11.0227	22.0147	5.11172	26.497	6.26246	0	3.93669	5.74298	1.02234	11.3558	301.307	-0.218221	-0.829227	0.611007	ATL2	chr2:38524948:-	chr2_38297819_-
chr5:89703549-89703671:mpeak_63781|chr5_89689924_89705603_CETN3_NM_-|	50.0306	0.0389775	0.869038	0.0448513	0.964226	0.998021	121.492	31.0295	51.177	133.046	50.0949	63.088	16.2824	36.426	14.9594	23.9291	23.5139	35.3293	301.027	-0.273565	-0.290679	0.0171138	CETN3	-	-
chr2:162165062-162165130:mpeak_46012|chr2_162164785_162267812_PSMD14_NM_+|	669.051	-0.637473	0.603459	-1.05637	0.290801	0.769072	1267.52	644.875	969.214	1381.19	1182.85	885.125	189.126	496.473	274.781	177.075	252.519	307.87	300.049	-0.259372	0.381033	-0.640405	PSMD14	-	chr2_161308602_+
chr19:33459816-33459869:mpeak_40092|chr19_33370284_33462935_CEP89_NM_-|	8.54744	1.37044	1.37694	0.995274	0.319603	0.792073	1.25249	13.4911	14.9594	17.2289	11.2458	15.1411	1.25249	5.39644	0	6.70014	10.2234	5.67792	297.823	-0.554242	-1.76522	1.21098	CEP89	chr19:33459815:-	chr19_32968910_-
chr2:26437319-26437435:mpeak_42512|chr2_26414264_26467594_HADHA_NM_-|	824.948	0.273149	0.391254	0.698139	0.485091	0.889083	1789.81	1535.29	2096.68	773.387	543.887	572.209	470.937	589.561	760.569	275.663	223.893	267.493	297.725	1.52077	1.24739	0.273383	HADHA	-	-
chr19:50484879-50485028:mpeak_41252|chr19_50480041_50528805_VRK3_NM_-|	70.0456	-0.746979	0.569682	-1.31122	0.189783	0.648305	57.6146	78.2484	108.653	168.461	151.307	107.881	21.2923	31.0295	29.9189	25.8434	38.8491	21.4499	297.317	-0.806497	-0.0668703	-0.739627	VRK3	chr19:50484888:-;chr19:50484962:-	chr19_49981686_-
chr11:134080159-134080311:mpeak_16152|chr11_134022947_134094426_NCAPD3_NM_-|	64.123	-1.15682	0.75441	-1.53341	0.125174	0.539619	159.066	171.337	147.232	27.7577	40.8938	44.7925	23.7973	90.3904	47.2403	2.87149	7.15641	6.93969	295.882	2.07393	3.25004	-1.17611	NCAPD3	-	chr11_134210307_-
chr10:34606028-34606190:mpeak_9384|chr10_34400490_35104253_PARD3_NM_-|	44.8272	-0.562652	0.928067	-0.606262	0.544341	0.918698	50.0996	168.639	23.6202	45.9438	77.6982	49.2087	33.8173	22.9349	25.9822	16.2718	9.2011	14.5103	292.936	0.487617	1.04909	-0.561478	PARD3	-	-
chr10:95443807-95443863:mpeak_10903|chr10_95429625_95462329_FRA10AC1_NM_-|	6.04839	1.77493	1.7584	1.0094	0.312783	0.788156	0	9.44377	8.66073	2.87149	15.3352	5.04704	0	5.39644	0.787339	4.78581	5.11172	15.1411	292.774	-0.361112	-2.0176	1.65648	FRA10AC1	-	chr10_93684055_-
chr14:55765765-55765949:mpeak_24208|chr14_55738020_55817098_FBXO34_NM_+|	26.9493	1.62024	0.848294	1.91	0.0561334	0.359531	32.5648	24.284	32.2809	40.2008	30.6703	30.9131	20.0399	8.09466	2.36202	34.4579	21.4692	46.0543	292.262	-0.191538	-1.74159	1.55005	FBXO34	chr14:55765944:+	chr14_55299219_+
chr5:126388131-126388246:mpeak_64561|chr5_126383607_126409184_C5orf63_NM_-|	8.87813	-1.13537	1.42599	-0.796197	0.425918	0.861883	0	20.2367	14.9594	8.61446	23.5139	11.3558	6.26246	9.44377	2.36202	1.91433	4.08938	3.78528	292.193	-0.305077	0.884225	-1.1893	C5orf63	chr5:126388192:-;chr5:126388217:-;chr5:126388244:-	chr5_127052439_-
chr17:57158438-57158577:mpeak_35480|chr17_57060282_57184266_TRIM37_NM_-|	109.018	0.525556	0.842412	0.623871	0.532712	0.915076	239.226	68.8046	99.2047	261.305	121.659	126.807	17.5349	78.2484	44.091	76.573	80.7652	94.0012	291.144	-0.323988	-0.845507	0.521518	TRIM37	chr17:57158457:-	-
chr12:114397854-114397932:mpeak_20302|chr12_114255991_114404176_RBM19_NM_-|	15.2317	-0.703525	1.07525	-0.654291	0.512924	0.903568	22.5448	36.426	30.7062	27.7577	13.2905	22.7117	0	13.4911	7.08605	1.91433	3.06703	3.78528	290.539	0.492089	1.23095	-0.738858	RBM19	-	-
chr7:105148716-105148999:mpeak_73465|chr7_105098373_105162685_PUS7_NM_-|	29.0347	0.380417	0.862817	0.440901	0.659285	0.960696	61.3721	13.4911	67.7111	49.7725	27.6033	30.9131	11.2724	17.5384	20.4708	11.486	15.3352	21.4499	289.305	0.396829	0.0298925	0.366936	PUS7	-	chr7_105508279_-;chr7_105508534_-
chr14:51237106-51237292:mpeak_23989|chr14_51190390_51297839_NIN_NM_-|	14.9725	1.97054	1.14773	1.7169	0.085998	0.449765	17.5349	4.04733	11.8101	34.4579	15.3352	26.497	5.00996	2.69822	0	12.4431	29.648	20.1882	288.804	-1.19198	-3.01429	1.82231	NIN	-	-
chr11:66417350-66417407:mpeak_14338|chr11_66406087_66433326_RBM4_NM_+|	11.9975	1.97125	1.39315	1.41496	0.15708	0.594598	8.76744	14.8402	36.2176	12.4431	15.3352	8.20145	0	5.39644	8.66073	2.87149	25.5586	5.67792	283.724	0.73357	-1.27881	2.01238	RBM4	chr11:66417401:+	chr11_66649929_+
chr3:157839874-157840007:mpeak_56956|chr3_157827840_158261971_RSRC1_NM_+|	59.6785	-0.822893	0.615779	-1.33635	0.181436	0.637316	93.9368	64.7573	55.9011	142.617	119.614	92.1085	12.5249	26.9822	36.2176	22.0147	20.4469	29.0205	283.389	-0.723517	0.0831813	-0.806698	RSRC1	-	chr3_158122121_+
chr10:65133587-65133637:mpeak_9891|chr10_64927894_65225761_JMJD1C_NM_-|	2.53511	6.17681	3.42115	1.80548	0.071	0.408899	0	0	13.3848	0	0	0	0	0	4.72403	1.91433	4.08938	6.3088	283.333	Inf	-1.38203	Inf	JMJD1C	-	-
chr10:126252167-126252230:mpeak_11989|chr10_126150340_126301832_LHPP_NM_+|	19.571	-0.942598	0.772812	-1.2197	0.222579	0.697349	22.5448	22.9349	48.0277	26.8006	34.7597	30.2823	13.7774	10.7929	8.66073	3.82865	6.13407	6.3088	281.386	0.0259179	1.03018	-1.00426	LHPP	chr10:126252225:+	chr10_124563653_+
chr2:203921179-203921237:mpeak_47125|chr2_203879601_204081975_NBEAL1_NM_+|	11.9415	0.00941886	1.32395	0.0071142	0.994324	0.998834	32.5648	21.5858	27.5569	9.57163	14.3128	10.725	11.2724	8.09466	0	3.82865	0	3.78528	281.259	1.2393	1.34689	-0.107591	NBEAL1	-	chr2_203056506_+
chrX:24717536-24717648:mpeak_82027|chrX_24712063_25013921_POLA1_NM_+|	62.7064	-1.05999	1.29134	-0.820849	0.411732	0.856543	194.136	91.7395	53.539	139.746	39.8714	70.6586	3.75747	91.7395	25.1948	13.4003	4.08938	24.6043	281.224	0.43953	1.51964	-1.08011	POLA1	-	chrX_24699513_+
chr8:17924265-17924499:mpeak_75039|chr8_17915132_17942507_ASAH1_NM_-|	292.97	-0.370911	0.413541	-0.896914	0.369765	0.827771	450.897	430.366	414.928	380.951	514.239	483.254	155.309	188.875	117.313	125.388	159.486	94.6321	280.866	-0.0887634	0.282201	-0.370964	ASAH1	chr8:17924272:-;chr8:17924396:-;chr8:17924445:-	chr8_18066764_-
chr16:2793746-2793800:mpeak_29282|chr16_2787289_2802601_SRRM2-AS1_NR_-|	4.97907	3.27129	1.9031	1.71893	0.0856278	0.449765	0	12.142	7.87339	4.78581	0	0	2.50498	2.69822	5.51137	4.78581	11.2458	8.20145	280.208	2.06427	-1.1774	3.24167	SRRM2-AS1	chr16:2793749:-	chr16_2743749_-
chr17:7217813-7217941:mpeak_33024|chr17_7216158_7218658_GPS2_NM_-|	106.158	-0.504731	0.525712	-0.96009	0.33701	0.802109	166.581	101.183	148.02	190.475	224.916	150.78	67.6345	36.426	44.8783	39.2437	63.3854	40.3764	279.165	-0.445404	0.0586503	-0.504054	GPS2	chr17:7217870:-	chr17_7314548_-
chr8:124113141-124113333:mpeak_77510|chr8_124084919_124164045_TBC1D31_NM_+|	3.27347	0.645623	3.01097	0.214424	0.830217	0.991589	3.75747	0	0	4.78581	9.2011	8.83233	0	1.34911	0	0	0	11.3558	278.515	-2.60242	-3.07336	0.470939	TBC1D31	chr8:124113330:+	chr8_123101023_+;chr8_123101100_+
chr14:102378887-102378968:mpeak_25896|chr14_102228134_102391477_PPP2R5C_NM_+|	344.755	-0.185397	0.351842	-0.526933	0.59824	0.940272	405.807	407.431	308.637	534.097	685.993	760.211	123.997	149.751	131.486	183.775	226.961	218.916	276.847	-0.819807	-0.6358	-0.184008	PPP2R5C	chr14:102378962:+	chr14_101912587_+;chr14_101912623_+
chr7:106791356-106791416:mpeak_73501|chr7_106685177_106799893_PRKAR2B_NM_+|	54.9715	-0.163622	0.786523	-0.208032	0.835204	0.991589	116.482	37.7751	45.6657	113.902	104.279	75.7057	18.7874	37.7751	15.7468	17.2289	37.8268	38.4837	276.483	-0.555822	-0.371394	-0.184428	PRKAR2B	-	chr7_107150971_+
chr19:33460938-33461126:mpeak_40093|chr19_33370284_33462935_CEP89_NM_-|	5.12578	2.29675	1.79978	1.27613	0.201909	0.667548	11.2724	0	7.08605	9.57163	3.06703	1.26176	1.25249	5.39644	0	6.70014	10.2234	5.67792	276.112	0.401317	-1.76522	2.16654	CEP89	-	-
chr11:61912643-61912768:mpeak_13795|chr11_61891444_61919233_INCENP_NM_+|	42.0169	-0.878892	0.860932	-1.02086	0.307321	0.781112	71.392	44.5206	81.8832	52.6439	76.6758	65.6116	7.51495	16.1893	48.0277	17.2289	14.3128	8.20145	275.743	0.0210461	0.851908	-0.830862	INCENP	-	chr11_62145235_+;chr11_62145277_+
chr4:76836011-76836145:mpeak_59752|chr4_76832506_76862166_NAAA_NM_-|	9.77059	1.93602	1.22407	1.58163	0.113734	0.517788	12.5249	6.74555	26.7695	12.4431	5.11172	5.04704	7.51495	1.34911	7.87339	5.74298	20.4469	5.67792	275.072	1.02644	-0.92902	1.95546	NAAA	-	chr4_75914926_-
chr9:173090-173286:mpeak_78235|chr9_121573_179075_CBWD1_NM_-|	55.037	0.566358	0.892836	0.634336	0.525862	0.910128	18.7874	126.816	45.6657	55.5154	93.0334	111.666	31.3123	25.6331	12.5974	40.2008	53.1619	46.0543	275.038	-0.444096	-1.00343	0.559338	CBWD1	-	-
chr4:170985907-170985984:mpeak_61603|chr4_170982120_171011538_AADAT_NM_-|	6.66636	1.56618	2.11493	0.740535	0.458975	0.879107	33.8173	4.04733	0	2.87149	5.11172	5.67792	12.5249	1.34911	0	1.91433	5.11172	7.57057	272.917	1.47077	-0.0732477	1.54402	AADAT	-	-
chr11:17332363-17332563:mpeak_12859|chr11_17298285_17352958_NUCB2_NM_+|	196.775	0.318908	0.560544	0.568926	0.569407	0.928299	147.794	315.692	182.663	275.663	350.664	389.253	66.382	109.278	61.4124	117.731	144.151	200.62	272.553	-0.652367	-0.964131	0.311764	NUCB2	-	chr11_17310882_+;chr11_17310900_+;chr11_17310989_+
chr3:141305681-141305804:mpeak_56498|chr3_141205888_141331124_RASA2_NM_+|	4.64983	2.96567	1.98725	1.49235	0.135607	0.5588	0	14.8402	7.08605	5.74298	2.04469	5.04704	0	4.04733	0	10.5288	2.04469	4.41616	270.873	0.772609	-2.06961	2.84222	RASA2	chr3:141305808:+	chr3_141586962_+
chr19:34710334-34710487:mpeak_40156|chr19_34663351_34718269_LSM14A_NM_+|	374.408	-0.527281	0.72929	-0.723006	0.469676	0.882644	437.119	151.1	381.072	1185.92	609.317	726.774	72.6445	205.065	80.3086	173.246	224.916	245.413	270.738	-1.37957	-0.846076	-0.533498	LSM14A	chr19:34710478:+	-
chrX:122802003-122802105:mpeak_83510|chrX_122735189_122866904_THOC2_NM_-|	21.1008	1.14973	1.39698	0.823007	0.410504	0.855396	21.2923	68.8046	1.57468	15.3146	34.7597	20.1882	8.76744	22.9349	2.36202	15.3146	20.4469	21.4499	269.113	0.383721	-0.748042	1.13176	THOC2	-	chrX_123668200_-
chr20:21314732-21314835:mpeak_48790|chr20_21283941_21369910_XRN2_NM_+|	85.2227	-0.0100602	0.788909	-0.0127521	0.989826	0.998503	179.106	128.165	257.46	63.1727	68.4971	46.6852	32.5648	125.467	55.9011	14.3574	15.3352	35.9602	263.976	1.66281	1.70423	-0.0414176	XRN2	-	chr20_21334158_+
chr21:40871740-40871845:mpeak_51003|chr21_40817796_40887014_SH3BGR_NM_+|	7.80935	0.356891	1.13907	0.313319	0.754038	0.981305	6.26246	9.44377	6.29871	5.74298	24.5363	11.9867	1.25249	4.04733	3.14936	9.57163	5.11172	6.3088	260.439	-0.941669	-1.31297	0.371298	SH3BGR	chr21:40871842:+	-
chr5:64846289-64846348:mpeak_63021|chr5_64814460_64858995_CENPK_NM_-|	33.7886	0.09167	0.945602	0.0969435	0.922771	0.994192	45.0897	33.7278	46.453	78.4873	61.3407	25.8661	3.75747	31.0295	13.3848	12.4431	20.4469	33.4367	260.049	-0.403476	-0.461401	0.0579247	CENPK	chr5:64846294:-	chr5_65550468_-
chr3:134264566-134264666:mpeak_56306|chr3_134204574_134293634_CEP63_NM_+|	38.5857	-2.01313	1.34636	-1.49524	0.134853	0.557447	68.887	44.5206	7.87339	119.645	95.0781	76.9674	0	6.74555	24.4075	5.74298	3.06703	10.0941	259.538	-1.26609	0.720675	-1.98676	CEP63	-	-
chr7:63984951-63985012:mpeak_72265|chr7_63982878_64023505_ZNF680_NM_-|	10.4186	0.876472	1.30213	0.673107	0.500879	0.896063	2.50498	21.5858	10.2354	5.74298	21.4692	18.9264	6.26246	5.39644	1.57468	3.82865	9.2011	18.2955	259.387	-0.426667	-1.24312	0.816458	ZNF680	chr7:63984957:-	-
chr7:77398059-77398186:mpeak_72718|chr7_77325742_77407846_RSBN1L_NM_+|	3.85785	0.567863	2.05953	0.275725	0.782759	0.982625	0	0	7.87339	1.91433	5.11172	8.20145	0	1.34911	4.72403	1.91433	5.11172	10.0941	259.285	-0.951622	-1.49518	0.543557	RSBN1L	-	-
chr1:109766593-109766671:mpeak_3726|chr1_109756514_109780352_SARS_NM_+|	878.763	0.148757	0.505712	0.294153	0.768641	0.981941	1847.42	1060.4	1929.77	1036.61	846.501	806.265	592.428	399.337	874.733	439.338	365.999	346.353	259.18	0.847019	0.696581	0.150438	SARS	chr1:109766670:+	chr1_109224024_+
chr3:73113998-73114268:mpeak_54994|chr3_73046118_73114547_PPP4R2_NM_+|	9.66585	1.44604	1.35898	1.06406	0.287302	0.768191	17.5349	6.74555	4.72403	26.8006	18.4022	17.6647	3.75747	0	0	3.82865	10.2234	6.3088	257.305	-1.11604	-2.43797	1.32193	PPP4R2	-	chr3_73065123_+
chr22:50829214-50829273:mpeak_52841|chr22_50781745_50882627_PPP6R2_NM_+|	69.4185	-0.715405	0.677816	-1.05546	0.291217	0.769072	81.4119	40.4733	79.5212	169.418	160.508	116.082	11.2724	22.9349	44.091	34.4579	33.7374	39.1146	257.23	-1.14696	-0.45473	-0.69223	PPP6R2	-	-
chr14:78197337-78197475:mpeak_25289|chr14_78184629_78227497_SNW1_NM_-|	138.402	0.206931	0.419475	0.493309	0.621794	0.946806	191.631	188.875	174.789	190.475	224.916	198.096	53.8571	90.3904	72.4352	65.0871	104.279	105.988	256.271	-0.143778	-0.345704	0.201927	SNW1	-	-
chr11:118350899-118350970:mpeak_15727|chr11_118307204_118392611_KMT2A_NM_+|	109.309	-0.544468	0.454531	-1.19787	0.230969	0.710624	175.349	148.402	114.164	173.246	192.201	188.002	45.0897	68.8046	58.2631	39.2437	43.9608	64.9807	254.369	-0.337801	0.216327	-0.554128	KMT2A	-	chr11_118480234_+
chr18:77960403-77960574:mpeak_38339|chr18_77918489_78005397_PARD6G_NM_-|	16.0283	1.63207	1.37292	1.18876	0.234534	0.71345	6.26246	29.6804	29.9189	19.1433	24.5363	37.2219	0	0	8.66073	4.78581	16.3575	15.772	253.488	-0.296725	-2.09166	1.79494	PARD6G	chr18:77960431:-;chr18:77960516:-	chr18_80202525_-
chr11:77445634-77445869:mpeak_14974|chr11_77378536_77531880_RSF1_NM_-|	53.539	-1.18551	1.18812	-0.997807	0.318373	0.792073	144.036	43.1715	54.3264	115.817	65.4301	78.8601	62.6246	26.9822	6.29871	25.8434	2.04469	17.0338	251.846	-0.106875	1.0942	-1.20107	RSF1	-	-
chr6:83710743-83710796:mpeak_68800|chr6_83602761_83775560_UBE3D_NM_-|	15.6645	1.47507	1.07319	1.37447	0.169295	0.613782	55.1096	21.5858	33.0682	6.70014	2.04469	7.57057	11.2724	25.6331	7.08605	1.91433	7.15641	8.83233	249.511	2.75009	1.29702	1.45307	UBE3D	-	-
chr11:47761058-47761184:mpeak_13511|chr11_47739064_47788993_FNBP4_NM_-|	7.43202	2.45575	1.74396	1.40815	0.159088	0.597177	3.75747	0	22.0455	1.91433	3.06703	11.3558	0	4.04733	6.29871	12.4431	12.2681	11.9867	249.399	0.659375	-1.82662	2.486	FNBP4	chr11:47761055:-;chr11:47761132:-	-
chr8:74461755-74461899:mpeak_76298|chr8_74333700_74659943_STAU2_NM_-|	15.6615	1.15543	1.58768	0.727749	0.466767	0.882126	32.5648	24.284	0	9.57163	8.17876	23.3426	26.3023	4.04733	3.93669	9.57163	26.581	19.5573	248.709	0.468238	-0.700299	1.16854	STAU2	chr8:74461752:-;chr8:74461836:-	chr8_73549519_-;chr8_73549586_-;chr8_73549618_-
chr14:20923694-20923872:mpeak_23096|chr14_20923289_20925149_APEX1_NM_+|	123.561	-0.137794	0.798356	-0.172597	0.862968	0.991589	249.246	151.1	189.749	223.976	146.195	111.035	40.0797	157.846	39.3669	42.1152	53.1619	78.8601	248.678	0.294291	0.446443	-0.152152	APEX1	-	chr14_20455587_+;chr14_20455660_+;chr14_20455676_+
chr21:46566119-46566224:mpeak_51303|chr21_46494492_46645461_ADARB1_NR_+mpeak_51303|chr21_46494492_46641932_ADARB1_NM_+||	24.4487	-0.67026	0.852603	-0.786134	0.431789	0.864348	23.7973	13.4911	28.3442	69.8729	58.2736	32.8058	6.26246	9.44377	11.0227	9.57163	7.15641	23.3426	245.549	-1.29415	-0.58414	-0.710008	ADARB1	chr21:46566210:+	chr21_45146295_+
chr9:109625961-109626024:mpeak_80107|chr9_109625377_109773103_ZNF462_NM_+|	60.3891	-1.02207	0.810381	-1.26123	0.207227	0.672336	93.9368	29.6804	52.7517	148.36	75.6535	174.123	25.0498	35.0769	11.8101	24.8862	17.3799	35.9602	245.172	-1.17467	-0.120924	-1.05374	ZNF462	-	chr9_106863733_+
chr16:82197692-82197814:mpeak_32007|chr16_82182468_82203829_MPHOSPH6_NM_-|	274.778	-0.439726	0.483549	-0.909371	0.363154	0.82305	358.212	327.834	255.098	491.982	480.502	539.403	134.017	171.337	82.6706	111.988	146.195	198.096	242.548	-0.683862	-0.233772	-0.45009	MPHOSPH6	-	chr16_82164034_-;chr16_82164095_-
chr13:111933360-111933469:mpeak_22921|chr13_111767623_111955337_ARHGEF7_NM_+|	5.90411	2.05821	1.4654	1.40454	0.160159	0.598201	5.00996	5.39644	3.93669	7.6573	12.2681	6.3088	1.25249	2.69822	0	1.91433	14.3128	10.0941	242.034	-0.871094	-2.73604	1.86495	ARHGEF7	chr13:111933415:+;chr13:111933475:+	chr13_111281064_+;chr13_111281148_+
chr16:89383333-89383405:mpeak_32344|chr16_89353521_89556969_ANKRD11_NR_-mpeak_32344|chr16_89335071_89556969_ANKRD11_NM_-||	37.785	-0.644938	0.727056	-0.887053	0.37505	0.829471	37.5747	41.8224	24.4075	109.117	72.5865	62.4572	15.0299	21.5858	6.29871	13.4003	24.5363	24.6043	241.888	-1.23396	-0.543339	-0.690618	ANKRD11	-	-
chr2:232079937-232079999:mpeak_47832|chr2_232063259_232236223_ARMC9_NM_+|	4.80954	-0.417918	2.40601	-0.173698	0.862103	0.991589	0	31.0295	2.36202	2.87149	3.06703	1.89264	0	1.34911	12.5974	1.91433	0	0.63088	239.426	2.09218	2.45405	-0.361867	ARMC9	chr2:232079993:+	chr2_231215279_+
chr20:21309190-21309303:mpeak_48786|chr20_21283941_21369910_XRN2_NM_+|	82.1497	-0.288377	0.738016	-0.390746	0.695985	0.969115	191.631	148.402	170.853	68.9157	58.2736	68.1351	32.5648	125.467	55.9011	14.3574	15.3352	35.9602	238.806	1.38713	1.70423	-0.317103	XRN2	-	chr20_21328607_+;chr20_21328636_+
chr10:128795053-128795151:mpeak_12094|chr10_128593977_129249595_DOCK1_NM_+|	10.5445	-1.21611	1.33927	-0.90804	0.363857	0.823398	10.0199	1.34911	14.1721	43.0723	10.2234	23.3426	2.50498	2.69822	5.51137	0.957163	5.11172	7.57057	238.378	-1.58524	-0.348211	-1.23703	DOCK1	-	-
chr13:42438371-42438426:mpeak_21967|chr13_42142441_42535221_VWA8_NM_-|	4.78702	3.39674	2.17248	1.56353	0.117928	0.525878	0	10.7929	8.66073	0	0	5.04704	0	2.69822	5.51137	12.4431	4.08938	8.20145	236.962	1.94653	-1.59111	3.53764	VWA8	chr13:42438375:-	chr13_41864237_-
chr9:15305526-15305621:mpeak_78473|chr9_15172107_15307358_TTC39B_NM_-|	9.88815	0.406513	1.43176	0.283926	0.776467	0.982625	15.0299	0	11.8101	7.6573	18.4022	15.1411	2.50498	12.142	2.36202	12.4431	17.3799	3.78528	236.698	-0.618283	-0.982518	0.364235	TTC39B	chr9:15305533:-;chr9:15305568:-	chr9_15305559_-
chr17:57092964-57093139:mpeak_35464|chr17_57060282_57184266_TRIM37_NM_-|	95.0452	0.476871	0.701164	0.680113	0.496433	0.894927	151.551	79.5975	95.268	182.818	98.1451	141.948	17.5349	78.2484	44.091	76.573	80.7652	94.0012	233.365	-0.373639	-0.845507	0.471868	TRIM37	-	-
chr9:5098280-5098349:mpeak_78338|chr9_4985244_5126683_JAK2_NM_+|	48.1592	-0.377127	1.11177	-0.339213	0.73445	0.978116	12.5249	109.278	15.7468	78.4873	125.748	82.6453	17.5349	33.7278	7.87339	19.1433	39.8714	35.3293	232.599	-1.0605	-0.673894	-0.386607	JAK2	-	chr9_5098333_+
chr20:43126799-43126953:mpeak_49398|chr20_43124996_43150726_SERINC3_NM_-|	8.62062	-1.18992	1.33427	-0.891815	0.372492	0.828608	25.0498	2.69822	20.4708	7.6573	6.13407	15.1411	6.26246	2.69822	11.8101	0.957163	2.04469	2.52352	232.148	0.736906	1.91041	-1.1735	SERINC3	-	-
chr4:185339677-185339807:mpeak_61793|chr4_185310220_185395726_IRF2_NM_-|	13.0432	-0.484513	0.821054	-0.59011	0.555117	0.921344	18.7874	13.4911	11.0227	26.8006	22.4916	22.0808	2.50498	6.74555	9.44807	5.74298	9.2011	8.20145	231.575	-0.72097	-0.307803	-0.413167	IRF2	chr4:185339685:-	-
chr4:160251002-160251066:mpeak_61453|chr4_160188997_160279265_RAPGEF2_NM_+|	13.1927	1.17746	0.955499	1.23229	0.217839	0.691271	12.5249	8.09466	15.7468	12.4431	20.4469	22.0808	3.75747	8.09466	3.93669	16.2718	7.15641	27.7587	230.33	-0.596062	-1.69687	1.10081	RAPGEF2	-	chr4_159329917_+
chr1:117584889-117584942:mpeak_4274|chr1_117569408_117602112_LOC101929099_NR_-|	14.1865	1.82283	0.975778	1.86808	0.0617507	0.379896	16.2824	28.3313	31.4936	4.78581	10.2234	9.46321	6.26246	22.9349	3.93669	11.486	14.3128	10.725	229.695	1.63687	-0.140521	1.7774	LOC101929099	-	chr1_117042268_-
chr13:50087214-50087308:mpeak_22247|chr13_50069800_50102646_PHF11_NM_+|	17.0853	1.4605	0.745693	1.95858	0.0501621	0.336981	21.2923	18.8875	26.7695	15.3146	18.4022	15.772	2.50498	14.8402	11.8101	22.9719	19.4245	17.0338	229.631	0.435969	-1.02744	1.46341	PHF11	chr13:50087302:+	-
chr15:65456363-65456428:mpeak_27791|chr15_65443251_65477563_CLPX_NM_-|	21.8756	0.201541	1.01232	0.199089	0.842193	0.991589	42.5847	25.6331	3.93669	32.5435	42.9385	29.6514	7.51495	12.142	11.8101	10.5288	25.5586	17.6647	229.302	-0.54306	-0.772479	0.22942	CLPX	-	chr15_65164034_-
chr16:10837871-10837933:mpeak_29636|chr16_10837642_10862903_NUBP1_NM_+|	215.991	-0.76508	0.626624	-1.22096	0.222103	0.696952	363.222	120.071	266.908	539.84	389.513	271.279	88.9269	110.627	130.698	78.4873	112.458	119.867	227.16	-0.678444	0.0875233	-0.765968	NUBP1	-	-
chr11:47765453-47765544:mpeak_13512|chr11_47739064_47788993_FNBP4_NM_-|	9.81451	1.71156	1.03025	1.66131	0.0966517	0.4764	18.7874	5.39644	11.0227	12.4431	9.2011	13.8794	0	4.04733	6.29871	12.4431	12.2681	11.9867	226.86	-0.0129333	-1.82662	1.81369	FNBP4	chr11:47765465:-;chr11:47765501:-	chr11_47743914_-
chr10:128596393-128596539:mpeak_12089|chr10_128593977_129249595_DOCK1_NM_+|	4.28298	-0.98911	1.79398	-0.55135	0.581394	0.932416	0	8.09466	0	3.82865	8.17876	6.93969	2.50498	2.69822	5.51137	0.957163	5.11172	7.57057	226.644	-1.22693	-0.348211	-0.878723	DOCK1	-	-
chr2:24522774-24523037:mpeak_42398|chr2_24426652_24583397_ITSN2_NM_-|	23.4595	-1.42102	0.956476	-1.48568	0.137364	0.562747	37.5747	26.9822	29.9189	62.2156	48.0502	32.8058	0	16.1893	11.8101	4.78581	6.13407	5.04704	224.947	-0.59872	0.81031	-1.40903	ITSN2	-	chr2_24299962_-
chr20:43126434-43126665:mpeak_49397|chr20_43124996_43150726_SERINC3_NM_-|	9.79656	-1.85214	1.28503	-1.44132	0.149493	0.583353	12.5249	8.09466	25.9822	17.2289	4.08938	23.3426	6.26246	2.69822	11.8101	0.957163	2.04469	2.52352	224.362	0.0613725	1.91041	-1.84904	SERINC3	chr20:43126577:-	-
chr9:96063480-96063611:mpeak_79608|chr9_95947211_96082648_WNK2_NM_+|	11.415	1.43605	1.24422	1.15418	0.248427	0.728557	8.76744	24.284	29.9189	11.486	7.15641	2.52352	5.00996	12.142	11.0227	0.957163	9.2011	14.5103	223.499	1.57293	0.191729	1.3812	WNK2	chr9:96063538:+;chr9:96063601:+	chr9_93301318_+
chr4:122732729-122732827:mpeak_60783|chr4_122722471_122737926_EXOSC9_NM_+|	68.4791	-0.000985935	0.526462	-0.00187276	0.998506	0.99994	102.704	120.071	70.8605	71.7872	100.19	101.572	37.5747	52.6153	41.729	26.8006	46.0055	49.8396	222.588	0.102229	0.105157	-0.00292762	EXOSC9	chr4:122732827:+	chr4_121811658_+
chr2:73682287-73682443:mpeak_43981|chr2_73612885_73836694_ALMS1_NM_+|	6.54285	-0.346036	1.94153	-0.178228	0.858544	0.991589	17.5349	0	0.787339	10.5288	7.15641	13.2485	2.50498	6.74555	3.14936	7.6573	9.2011	0	221.642	-0.755585	-0.443141	-0.312444	ALMS1	-	chr2_73455235_+;chr2_73455348_+
chr10:12077056-12077450:mpeak_8701|chr10_11963306_12085169_UPF2_NM_-|	66.9887	-0.962257	1.00578	-0.956723	0.338707	0.804728	58.8671	71.5028	14.9594	193.347	140.061	148.888	15.0299	45.8698	4.72403	47.8581	33.7374	29.0205	221.459	-1.73059	-0.753272	-0.97732	UPF2	-	chr10_12035061_-;chr10_12035132_-;chr10_12035156_-;chr10_12035175_-;chr10_12035222_-;chr10_12035238_-;chr10_12035349_-
chr11:73950172-73950280:mpeak_14809|chr11_73882107_73964536_PPME1_NM_+|	337.434	0.313861	0.362132	0.866703	0.386105	0.840942	522.289	597.656	636.957	338.836	346.575	273.802	251.751	202.367	339.343	176.118	179.933	183.586	221.423	0.873111	0.556169	0.316942	PPME1	-	chr11_74239184_+;chr11_74239225_+
chr17:5253845-5253935:mpeak_32914|chr17_5185557_5286888_RABEP1_NM_+|	30.2401	1.63885	1.06102	1.54459	0.122445	0.532967	5.00996	40.4733	18.1088	36.3722	49.0725	29.0205	7.51495	18.8875	2.36202	34.4579	57.2513	64.3498	221.078	-0.847991	-2.43973	1.59174	RABEP1	-	-
chr11:75115639-75115816:mpeak_14862|chr11_75110534_75132770_RPS3_NM_+|	15.8185	0.134117	1.63683	0.0819369	0.934697	0.994192	61.3721	2.69822	14.9594	39.2437	6.13407	4.41616	3.75747	10.7929	21.2581	18.1861	5.11172	1.89264	220.701	0.666426	0.507425	0.159001	RPS3	chr11:75115715:+;chr11:75115813:+	chr11_75404669_+
chr10:54214292-54214520:mpeak_9729|chr10_54211277_54230293_LINC01468_NR_-|	155.808	0.342679	0.623429	0.549668	0.582547	0.932589	196.641	178.083	97.63	267.048	312.837	172.23	83.9169	94.4377	36.2176	125.388	172.776	132.485	220.137	-0.671088	-1.00505	0.333963	LINC01468	-	-
chr2:202006163-202006332:mpeak_47023|chr2_201980826_202027718_CFLAR_NM_+|	87.5119	0.0328696	0.427719	0.0768487	0.938744	0.995633	71.392	76.8993	114.164	144.532	173.799	136.901	42.5847	37.7751	40.1543	65.0871	78.7205	68.1351	217.78	-0.794527	-0.814473	0.0199455	CFLAR	chr2:202006216:+;chr2:202006321:+	chr2_201141490_+;chr2_201141537_+;chr2_201141596_+
chr6:56976803-56976922:mpeak_68478|chr6_56954807_57033220_ZNF451_NM_+|	20.735	-0.494408	0.933388	-0.529692	0.596326	0.939685	31.3123	32.3786	36.2176	46.901	13.2905	17.0338	12.5249	24.284	9.44807	6.70014	14.3128	4.41616	215.986	0.371535	0.863189	-0.491653	ZNF451	chr6:56976856:+;chr6:56976913:+	chr6_57112057_+;chr6_57112121_+
chr2:160261357-160261429:mpeak_45952|chr2_160176929_160473112_BAZ2B_NM_-|	6.46185	2.23029	1.83747	1.21378	0.224832	0.701675	0	2.69822	0	5.74298	9.2011	6.3088	1.25249	0	0	16.2718	18.4022	17.6647	215.428	-2.97758	-5.385	2.40743	BAZ2B	-	chr2_159404848_-
chr16:2808458-2808557:mpeak_29287|chr16_2802329_2820858_SRRM2_NM_+|	918.721	-0.919592	0.493138	-1.86477	0.062213	0.380391	1717.17	1770.03	1582.55	1077.77	1180.81	607.538	502.249	1026.67	849.539	204.833	252.519	252.983	213.153	0.82282	1.74346	-0.920637	SRRM2	-	chr16_2758473_+;chr16_2758508_+
chr11:82869820-82869939:mpeak_15042|chr11_82868136_82895720_PCF11_NM_+|	24.8616	0.073688	0.609131	0.120972	0.903713	0.994055	35.0698	36.426	20.4708	35.415	43.9608	29.6514	16.2824	13.4911	13.3848	19.1433	17.3799	17.6647	213.091	-0.245507	-0.328331	0.0828235	PCF11	chr11:82869878:+;chr11:82869921:+	chr11_83158836_+;chr11_83158893_+
chr12:69756563-69756623:mpeak_18924|chr12_69753489_69783926_YEATS4_NM_+|	73.19	-0.207059	0.642805	-0.322118	0.747363	0.978885	85.1694	45.8698	99.992	134.96	144.151	103.464	15.0299	47.2189	46.453	59.3441	48.0502	48.5778	212.537	-0.727655	-0.520913	-0.206742	YEATS4	-	-
chr5:149776090-149776416:mpeak_65577|chr5_149737201_149779372_TCOF1_NM_+|	120.932	-0.050234	0.424571	-0.118317	0.905816	0.994055	245.488	192.923	268.483	94.7591	87.9216	99.6791	116.482	120.071	96.0553	52.6439	47.0279	29.6514	212.531	1.32396	1.36284	-0.0388832	TCOF1	chr5:149776241:+;chr5:149776359:+;chr5:149776406:+	chr5_150396679_+;chr5_150396752_+;chr5_150396766_+;chr5_150396797_+;chr5_150396846_+
chr9:99800196-99800268:mpeak_79800|chr9_99795330_99801925_CTSV_NM_-|	11.86	-0.566955	1.83062	-0.309707	0.756784	0.981941	36.3222	0	12.5974	23.9291	15.3352	14.5103	0	17.5384	5.51137	1.91433	2.04469	12.6176	212.235	-0.136507	0.475604	-0.612112	CTSV	chr9:99800200:-	-
chr14:35252960-35253069:mpeak_23626|chr14_35222910_35344853_BAZ1A_NM_-|	22.8213	0.460726	1.33442	0.345262	0.729898	0.977627	31.3123	55.3135	2.36202	29.672	30.6703	26.497	2.50498	32.3786	7.08605	11.486	22.4916	22.0808	212.029	0.0352588	-0.417582	0.452841	BAZ1A	-	-
chr6:135715793-135715850:mpeak_69833|chr6_135606785_135818903_AHI1_NM_-|	4.83067	1.02612	2.49251	0.411683	0.680572	0.964494	0	5.39644	0	1.91433	14.3128	0	3.75747	1.34911	0	3.82865	12.2681	15.1411	211.352	-1.58833	-2.61287	1.02454	AHI1	chr6:135715795:-	chr6_135394676_-
chr15:85150062-85150122:mpeak_28544|chr15_85144248_85163832_ZSCAN2_NM_+|	10.0701	-0.250905	1.22209	-0.205307	0.837332	0.991589	6.26246	13.4911	22.8328	20.1004	18.4022	11.9867	0	4.04733	9.44807	7.6573	4.08938	2.52352	210.375	-0.245587	-0.0805383	-0.165048	ZSCAN2	chr15:85150116:+	chr15_84606884_+
chr3:41900889-41900939:mpeak_53985|chr3_41288483_42003660_ULK4_NM_-|	5.77114	-0.0107091	2.15189	-0.00497661	0.996029	0.999441	26.3023	1.34911	4.72403	14.3574	0	0	5.00996	2.69822	7.87339	0.957163	4.08938	1.89264	207.78	1.1731	1.167	0.00609882	ULK4	-	-
chr10:29843985-29844043:mpeak_9261|chr10_29747262_30024730_SVIL_NM_-|	16.0638	0.190499	1.26631	0.150436	0.880421	0.993065	18.7874	26.9822	4.72403	12.4431	42.9385	19.5573	2.50498	5.39644	16.5341	3.82865	16.3575	22.7117	206.64	-0.569614	-0.811925	0.242311	SVIL	chr10:29843980:-	-
chr17:65850733-65850892:mpeak_36159|chr17_65821779_65978367_BPTF_NM_+|	61.6294	-0.103479	1.06682	-0.0969978	0.922728	0.994192	126.502	63.4082	14.9594	134.003	70.5418	95.263	31.3123	60.71	7.87339	35.415	40.8938	58.6719	205.083	-0.549333	-0.434259	-0.115074	BPTF	-	-
chr2:101182952-101183058:mpeak_44715|chr2_101179417_101192815_PDCL3_NM_+|	121.75	-0.0401686	0.725156	-0.0553931	0.955825	0.99738	271.791	107.929	119.675	216.319	153.352	117.975	135.269	62.0591	46.453	64.1299	69.5194	96.5247	204.854	0.0343496	0.0828612	-0.0485116	PDCL3	-	chr2_100566541_+;chr2_100566562_+
chr14:58740624-58740712:mpeak_24319|chr14_58734111_58764855_PSMA3-AS1_NR_-|	83.8017	0.705419	0.736079	0.958347	0.337888	0.803625	83.9169	118.722	76.3719	106.245	151.307	70.6586	83.9169	26.9822	25.9822	108.159	94.0557	59.3028	203.834	-0.234303	-0.933984	0.699681	PSMA3-AS1	chr14:58740650:-	chr14_58273913_-
chr9:37881884-37881947:mpeak_78967|chr9_37880745_37904350_SLC25A51_NR_-|	26.465	0.476029	0.901734	0.527904	0.597566	0.939685	17.5349	56.6626	25.1948	22.9719	43.9608	32.8058	15.0299	13.4911	20.4708	7.6573	37.8268	23.9735	202.875	-0.00501576	-0.50359	0.498574	SLC25A51	chr9:37881890:-	chr9_37881894_-;chr9_37881951_-
chr15:44914913-44915000:mpeak_26890|chr15_44855499_44955876_SPG11_NM_-|	23.643	-1.16453	1.28711	-0.904761	0.365592	0.824604	62.6246	31.0295	61.4124	19.1433	11.2458	11.9867	3.75747	49.9171	22.8328	0.957163	8.17876	0.63088	202.682	1.87158	2.96964	-1.09807	SPG11	-	-
chr9:132274898-132274961:mpeak_81049|chr9_132250938_132275697_LINC00963_NR_+|	12.848	-0.474135	1.15408	-0.410833	0.681195	0.964494	15.0299	9.44377	31.4936	11.486	29.648	10.725	5.00996	9.44377	13.3848	0.957163	11.2458	6.3088	201.043	0.10999	0.588639	-0.478649	LINC00963	chr9:132274958:+	chr9_129512669_+
chr6:44371543-44371772:mpeak_68241|chr6_44355250_44414343_CDC5L_NM_+|	57.5943	-0.80298	0.866007	-0.927222	0.353811	0.817306	63.877	124.118	53.539	77.5302	82.8099	95.8938	7.51495	70.1537	42.5163	25.8434	21.4692	25.8661	200.969	-0.0852338	0.71576	-0.800994	CDC5L	-	chr6_44403880_+;chr6_44403988_+;chr6_44404021_+
chr5:64850616-64850742:mpeak_63023|chr5_64814460_64858995_CENPK_NM_-|	33.8206	-0.534777	0.879226	-0.608236	0.543031	0.917719	46.3422	22.9349	26.7695	68.9157	66.4524	59.9336	3.75747	31.0295	13.3848	12.4431	20.4469	33.4367	199.384	-1.0239	-0.461401	-0.562498	CENPK	-	chr5_65554833_-;chr5_65554855_-
chr17:30377297-30377384:mpeak_34067|chr17_30348154_30380284_LRRC37B_NM_+|	22.4465	-1.99387	1.18329	-1.68503	0.0919822	0.46705	21.2923	41.8224	11.0227	63.1727	67.4747	26.497	0	16.1893	8.66073	5.74298	3.06703	4.41616	198.893	-1.08382	0.909853	-1.99367	LRRC37B	-	-
chr19:33462314-33462424:mpeak_40094|chr19_33370284_33462935_CEP89_NM_-|	7.3825	0.901839	1.34753	0.669255	0.503333	0.897566	3.75747	12.142	3.93669	11.486	20.4469	7.57057	1.25249	5.39644	0	6.70014	10.2234	5.67792	198.891	-0.993844	-1.76522	0.77138	CEP89	chr19:33462319:-;chr19:33462370:-	chr19_32971465_-
chr3:53262315-53262380:mpeak_54567|chr3_53259947_53290130_TKT_NR_-mpeak_54567|chr3_53259625_53290130_TKT_NM_-||	175.297	-0.670824	0.654154	-1.02548	0.305135	0.779285	349.445	141.657	439.335	255.562	145.173	134.378	118.987	164.591	185.025	70.83	53.1619	45.4234	198.556	0.798065	1.4678	-0.669736	TKT	chr3:53262301:-	chr3_53228329_-
chr9:86399650-86399759:mpeak_79351|chr9_86354659_86432752_GKAP1_NM_-|	16.1311	0.233494	1.19319	0.195689	0.844853	0.991589	20.0399	32.3786	7.87339	9.57163	34.7597	20.1882	23.7973	2.69822	3.93669	17.2289	12.2681	8.83233	198.118	-0.0977716	-0.33285	0.235079	GKAP1	-	chr9_83784803_-
chr10:54214594-54214936:mpeak_9730|chr10_54211277_54230293_LINC01468_NR_-|	157.639	0.0494989	0.713217	0.0694023	0.944669	0.996351	209.166	159.195	55.1137	227.805	308.748	286.42	83.9169	94.4377	36.2176	125.388	172.776	132.485	197.358	-0.958568	-1.00505	0.0464824	LINC01468	-	-
chr14:35249294-35249524:mpeak_23624|chr14_35222910_35344853_BAZ1A_NM_-|	20.981	0.649268	1.11005	0.584901	0.558614	0.922948	27.5548	41.8224	13.3848	24.8862	13.2905	32.8058	2.50498	32.3786	7.08605	11.486	22.4916	22.0808	197.195	0.221505	-0.417582	0.639087	BAZ1A	chr14:35249293:-;chr14:35249322:-	chr14_34780088_-;chr14_34780185_-;chr14_34780258_-
chr4:128998933-128999045:mpeak_60909|chr4_128982420_129131010_LARP1B_NM_+|	13.5796	-0.471598	1.4126	-0.333851	0.738492	0.978885	22.5448	28.3313	14.9594	17.2289	25.5586	17.0338	5.00996	0	17.3215	0	6.13407	8.83233	196.541	0.138208	0.577348	-0.43914	LARP1B	-	chr4_128077850_+
chr19:16965594-16965871:mpeak_39569|chr19_16940197_16989307_SIN3B_NM_+|	92.5158	-0.894242	0.638774	-1.39993	0.161533	0.600336	87.6744	156.497	189.749	80.4017	142.106	134.378	56.3621	75.5502	89.7566	17.2289	38.8491	41.6381	195.751	0.281969	1.18174	-0.899769	SIN3B	chr19:16965640:+;chr19:16965668:+;chr19:16965709:+;chr19:16965735:+;chr19:16965779:+;chr19:16965861:+	chr19_16854856_+;chr19_16854897_+;chr19_16854919_+;chr19_16854967_+;chr19_16854998_+;chr19_16855049_+
chr3:20207633-20207689:mpeak_53488|chr3_20202718_20227725_SGOL1_NM_-|	3.96223	4.15145	2.30783	1.79885	0.0720423	0.410256	0	10.7929	7.08605	0	0	1.89264	3.75747	5.39644	0	1.91433	4.08938	12.6176	195.315	3.23979	-1.02449	4.26428	SGOL1	chr3:20207636:-	chr3_20166121_-;chr3_20166141_-
chr14:73569870-73570189:mpeak_24916|chr14_73525220_73586420_RBM25_NM_+|	166.397	-0.568265	0.514774	-1.10391	0.269631	0.74803	291.83	291.408	153.531	237.376	198.335	218.285	91.4319	182.13	105.503	78.4873	74.6312	73.813	194.365	0.171932	0.740189	-0.568257	RBM25	-	chr14_73103167_+;chr14_73103210_+;chr14_73103242_+;chr14_73103392_+;chr14_73103436_+;chr14_73103475_+
chr12:98929301-98929431:mpeak_19545|chr12_98909350_98941350_TMPO_NM_+|	545.689	0.742474	0.537865	1.38041	0.16746	0.610578	741.475	1028.02	932.996	352.236	494.815	471.899	276.801	705.585	409.416	282.363	386.446	466.221	194.172	1.0349	0.294223	0.740679	TMPO	chr12:98929407:+	chr12_98535573_+;chr12_98535627_+
chr13:42380292-42380342:mpeak_21966|chr13_42142441_42535221_VWA8_NM_-|	4.30873	4.12512	2.25333	1.83068	0.0671486	0.394846	2.50498	0	13.3848	2.87149	0	0	0	2.69822	5.51137	12.4431	4.08938	8.20145	193.551	2.46823	-1.59111	4.05933	VWA8	-	-
chr3:42672668-42672814:mpeak_54015|chr3_42642146_42687379_NKTR_NM_+|	17.9784	0.302968	1.15158	0.26309	0.792481	0.98449	36.3222	44.5206	18.1088	18.1861	11.2458	10.725	1.25249	35.0769	14.9594	10.5288	4.08938	10.725	192.93	1.30108	1.01705	0.284029	NKTR	-	-
chr5:60186377-60186560:mpeak_62932|chr5_60170510_60240905_ERCC8_NM_-|	6.81183	1.19072	1.30227	0.914348	0.360534	0.822937	10.0199	0	7.08605	3.82865	6.13407	8.83233	7.51495	2.69822	3.14936	7.6573	7.15641	17.6647	192.022	-0.135852	-1.28129	1.14543	ERCC8	chr5:60186378:-;chr5:60186420:-;chr5:60186483:-;chr5:60186509:-	chr5_60890525_-;chr5_60890595_-;chr5_60890657_-
chr1:214655651-214655716:mpeak_7426|chr1_214531393_214725024_PTPN14_NM_-|	64.1989	-0.122293	0.551767	-0.221639	0.824595	0.990219	86.4219	99.8342	79.5212	73.7015	117.57	54.8866	47.5947	40.4733	51.177	31.5864	54.1843	33.4367	190.87	0.110635	0.224153	-0.113518	PTPN14	-	-
chr13:34423461-34423599:mpeak_21764|chr13_34392205_34540223_RFC3_NM_+|	3.85908	1.50579	2.01773	0.746279	0.455499	0.878056	8.76744	0	6.29871	3.82865	0	5.67792	2.50498	5.39644	0	4.78581	7.15641	1.89264	190.676	0.664313	-0.808124	1.47244	RFC3	-	-
chr15:72170373-72170426:mpeak_28053|chr15_72119384_72410440_MYO9A_NM_-|	14.808	-1.69024	1.458	-1.15929	0.246339	0.728557	27.5548	13.4911	0.787339	21.0576	32.715	44.1616	1.25249	17.5384	3.14936	6.70014	6.13407	3.1544	190.669	-1.22716	0.456538	-1.6837	MYO9A	-	chr15_71878044_-
chr15:44105173-44105327:mpeak_26826|chr15_44097474_44116951_MFAP1_NM_-|	37.2841	0.50777	0.678692	0.748159	0.454364	0.877749	68.887	53.9644	33.8556	40.2008	48.0502	30.9131	31.3123	36.426	14.9594	33.5007	35.7821	19.5573	189.494	0.395119	-0.103363	0.498482	MFAP1	-	chr15_43813066_-
chr12:51634319-51634389:mpeak_17866|chr12_51632507_51639844_DAZAP2_NM_+|	4.26897	-0.723398	2.52268	-0.286758	0.774298	0.982625	0	8.09466	0	7.6573	13.2905	0	0	5.39644	3.14936	0.957163	5.11172	7.57057	189.442	-1.37175	-0.674499	-0.697256	DAZAP2	chr12:51634371:+;chr12:51634407:+	chr12_51240586_+
chr17:16121470-16121536:mpeak_33366|chr17_16120508_16229113_PIGL_NM_+|	13.6733	-0.118579	0.947022	-0.125212	0.900355	0.994055	17.5349	14.8402	25.1948	20.1004	13.2905	18.2955	15.0299	10.7929	4.72403	1.91433	12.2681	10.0941	188.465	0.15553	0.331458	-0.175928	PIGL	chr17:16121528:+	chr17_16218177_+;chr17_16218214_+
chr10:11798152-11798297:mpeak_8683|chr10_11784355_11805222_ECHDC3_NM_+|	20.529	-0.407258	1.13165	-0.359879	0.718937	0.97626	16.2824	9.44377	59.0504	24.8862	25.5586	32.8058	2.50498	26.9822	15.7468	7.6573	15.3352	10.0941	187.418	0.0262044	0.451161	-0.424957	ECHDC3	chr10:11798202:+;chr10:11798287:+;chr10:11798326:+	chr10_11756288_+
chr10:74322657-74322839:mpeak_10218|chr10_74128113_74385949_MICU1_NM_-|	147.61	-0.141922	0.554122	-0.256121	0.797858	0.985511	245.488	122.769	319.66	146.446	153.352	182.955	97.6943	136.26	133.848	58.3869	76.6758	97.7865	187.035	0.510949	0.659533	-0.148584	MICU1	-	-
chr13:79212952-79213145:mpeak_22571|chr13_79191257_79233314_RNF219_NM_-|	6.32332	0.448354	1.72674	0.259653	0.795132	0.985302	0	9.44377	0	2.87149	2.04469	10.0941	7.51495	1.34911	6.29871	15.3146	10.2234	10.725	186.848	-0.668514	-1.25797	0.589452	RNF219	-	chr13_78638822_-
chr11:10795573-10795722:mpeak_12667|chr11_10772533_10800225_CTR9_NM_+|	106.178	-0.949191	0.713745	-1.32987	0.18356	0.640179	187.874	168.639	182.663	157.932	97.1227	93.3703	41.3322	178.083	70.8605	25.8434	30.6703	39.7455	185.746	0.629906	1.59243	-0.962519	CTR9	-	chr11_10774076_+;chr11_10774143_+
chr9:98740444-98740501:mpeak_79723|chr9_98637899_98774506_ERCC6L2_NM_+|	11.7287	2.16654	1.60769	1.34761	0.177784	0.630773	0	0	18.1088	5.74298	1.02234	5.04704	10.0199	12.142	7.08605	42.1152	17.3799	22.0808	185.744	0.616393	-1.47981	2.0962	ERCC6L2	-	-
chr12:104325290-104325406:mpeak_19731|chr12_104324111_104341410_HSP90B1_NM_+|	3111.63	0.0391423	0.762681	0.0513219	0.959069	0.99768	5549.79	4209.22	4413.82	3912.88	3326.71	2756.32	829.149	4713.79	2094.32	1098.82	2051.85	2382.84	185.575	0.503719	0.464862	0.0388567	HSP90B1	chr12:104325396:+	-
chr6:25285029-25285128:mpeak_67084|chr6_25279655_25619674_LRRC16A_NM_+|	37.5735	0.0999908	0.761316	0.131339	0.895507	0.994055	56.3621	84.994	64.5618	30.6292	23.5139	31.544	20.0399	63.4082	27.5569	10.5288	11.2458	26.497	185.503	1.26492	1.20138	0.0635399	LRRC16A	-	-
chr3:160665686-160665749:mpeak_57081|chr3_160473995_160786598_PPM1L_NM_+|	32.4217	-0.178402	0.984942	-0.181129	0.856266	0.991589	72.6445	14.8402	10.2354	79.4445	27.6033	52.994	18.7874	18.8875	15.7468	24.8862	29.648	23.3426	182.922	-0.711721	-0.543768	-0.167953	PPM1L	-	chr3_160947947_+
chr15:78811207-78811349:mpeak_28340|chr15_78799905_78829641_HYKK_NM_+|	9.00057	-0.663447	1.13559	-0.58423	0.559066	0.922967	10.0199	2.69822	12.5974	10.5288	24.5363	15.772	2.50498	2.69822	8.66073	8.61446	3.06703	6.3088	182.6	-1.00586	-0.375883	-0.629973	HYKK	chr15:78811382:+	chr15_78518945_+;chr15_78519032_+
chr7:129043207-129043282:mpeak_73907|chr7_128864854_129066879_AHCYL2_NM_+|	7.42436	-1.36053	1.6282	-0.835604	0.403378	0.853346	8.76744	5.39644	18.1088	19.1433	7.15641	5.67792	2.50498	8.09466	7.08605	0	7.15641	0	182.479	0.0132519	1.30527	-1.29202	AHCYL2	-	-
chr1:113992583-113992947:mpeak_3972|chr1_113933474_114224833_MAGI3_NM_+|	66.0794	0.374805	0.617019	0.607445	0.543556	0.918374	112.724	53.9644	66.9238	103.374	65.4301	84.538	45.0897	49.9171	33.0682	52.6439	38.8491	86.4306	182.403	-0.116967	-0.47427	0.357303	MAGI3	-	-
chr6:24548493-24548551:mpeak_67046|chr6_24547571_24646383_KIAA0319_NM_-|	4.67313	0.628458	2.51456	0.249928	0.802643	0.98692	0	10.7929	18.1088	0	0	1.26176	2.50498	13.4911	7.87339	0	2.04469	0	181.623	4.51764	3.54521	0.972429	KIAA0319	chr6:24548492:-	chr6_24548268_-
chr2:152139366-152139463:mpeak_45786|chr2_152127389_152146430_NMI_NM_-|	38.2515	-0.94995	0.964807	-0.984601	0.32482	0.792433	26.3023	22.9349	45.6657	116.774	48.0502	78.8601	13.7774	28.3313	10.2354	4.78581	36.8044	26.497	181.306	-1.36049	-0.379356	-0.981133	NMI	-	-
chr5:74842830-74842958:mpeak_63452|chr5_74807656_74893758_POLK_NM_+|	26.3964	-0.182495	1.00427	-0.181719	0.855803	0.991589	50.0996	14.8402	8.66073	49.7725	36.8044	49.8396	5.00996	26.9822	8.66073	20.1004	24.5363	21.4499	181.046	-0.890228	-0.701	-0.189228	POLK	-	-
chr2:48047496-48047552:mpeak_43295|chr2_48035386_48132932_FBXO11_NM_-|	12.1429	0.62255	1.21504	0.512368	0.608393	0.942766	18.7874	0	8.66073	11.486	8.17876	22.0808	3.75747	12.142	7.08605	16.2718	13.2905	23.9735	179.122	-0.604916	-1.21978	0.614861	FBXO11	-	-
chr19:37851415-37851465:mpeak_40372|chr19_37825579_37853010_HKR1_NM_+|	4.28591	3.12452	1.91181	1.63432	0.102191	0.487998	0	2.69822	15.7468	0	0	1.89264	3.75747	5.39644	6.29871	3.82865	6.13407	5.67792	179.047	3.28476	-0.0174478	3.3022	HKR1	chr19:37851466:+	chr19_37360563_+
chr8:100146848-100146938:mpeak_76949|chr8_100025493_100887645_VPS13B_NM_+|	12.2888	-1.54983	1.03348	-1.49962	0.133713	0.556419	30.0598	12.142	19.6835	4.78581	20.4469	17.6647	16.2824	8.09466	10.2354	2.87149	2.04469	3.1544	178.795	0.528707	2.10055	-1.57184	VPS13B	-	-
chr1:150917732-150917800:mpeak_5019|chr1_150898814_150936722_SETDB1_NM_+|	39.9934	0.394308	0.646665	0.609756	0.542023	0.917346	30.0598	86.3431	51.9644	31.5864	44.9832	47.9469	23.7973	31.0295	39.3669	24.8862	35.7821	32.1749	178.746	0.435275	0.0208361	0.414439	SETDB1	chr1:150917790:+	chr1_150945325_+
chr2:141806292-141806410:mpeak_45646|chr2_140990895_142889270_LRP1B_NM_-|	6.52537	0.889573	2.51731	0.353382	0.723802	0.976442	0	12.142	23.6202	3.82865	2.04469	15.772	10.0199	0	0	0	2.04469	8.83233	178.455	0.724377	-0.11841	0.842787	LRP1B	chr2:141806351:-	chr2_141048725_-
chr1:40035254-40035348:mpeak_1915|chr1_40026794_40042521_PABPC4_NM_-|	199.231	-0.738849	1.23348	-0.598994	0.549177	0.92054	185.369	155.148	143.296	517.825	325.106	380.421	5.00996	228	39.3669	56.4726	125.748	229.01	177.626	-1.33832	-0.594345	-0.743975	PABPC4	-	-
chr17:79084261-79084374:mpeak_36817|chr17_79008946_79089569_BAIAP2_NM_+|	31.3878	1.55251	0.98721	1.57262	0.115807	0.521513	38.8272	35.0769	82.6706	20.1004	5.11172	23.9735	8.76744	24.284	55.1137	27.7577	26.581	28.3896	177.592	1.67054	0.0918274	1.57872	BAIAP2	chr17:79084274:+;chr17:79084313:+	chr17_81110481_+;chr17_81110512_+
chr3:138340304-138340392:mpeak_56410|chr3_138327541_138351771_FAIM_NM_+|	62.1199	-0.857856	0.702409	-1.22131	0.22197	0.696941	112.724	44.5206	51.177	137.831	78.7205	104.095	32.5648	62.0591	22.8328	31.5864	35.7821	31.544	177.446	-0.62148	0.247905	-0.869385	FAIM	-	chr3_138621535_+
chr22:31858952-31859132:mpeak_52117|chr22_31836107_31885874_EIF4ENIF1_NM_-|	55.9732	-1.03764	0.58169	-1.78383	0.074451	0.418741	70.1395	103.881	66.9238	74.6587	69.5194	87.0615	42.5847	59.3609	33.8556	12.4431	31.6927	19.5573	177.425	0.059314	1.09229	-1.03297	EIF4ENIF1	-	-
chr13:45589566-45589738:mpeak_22058|chr13_45563686_45601919_GPALPP1_NM_+|	11.3656	-0.824936	1.34788	-0.612026	0.54052	0.916925	2.50498	6.74555	18.1088	41.158	13.2905	28.3896	6.26246	4.04733	0	3.82865	5.11172	6.93969	176.915	-1.59826	-0.623202	-0.97506	GPALPP1	-	chr13_45015587_+
chr7:26236422-26236655:mpeak_71524|chr7_26231958_26240413_HNRNPA2B1_NM_-mpeak_71524|chr7_26231958_26240413_HNRNPA2B1_NM_-||	895.435	0.261179	0.63685	0.410111	0.681724	0.964494	1990.21	682.65	1036.14	1261.54	731.999	941.905	522.289	1010.48	572.395	513.039	678.837	803.742	176.185	0.33745	0.0770998	0.26035	HNRNPA2B1	chr7:26236468:-;chr7:26236563:-	chr7_26196883_-;chr7_26196905_-;chr7_26197000_-
chr2:39262345-39262402:mpeak_43037|chr2_39213456_39347604_SOS1_NM_-|	42.1729	-0.17568	0.681038	-0.257958	0.796439	0.985302	46.3422	47.2189	29.9189	93.8019	71.5641	42.269	13.7774	32.3786	24.4075	32.5435	24.5363	47.316	174.991	-0.749774	-0.565069	-0.184705	SOS1	-	-
chr1:19423681-19423768:mpeak_777|chr1_19401390_19536746_UBR4_NM_-|	471.174	-0.241305	0.381096	-0.633186	0.526612	0.910128	1136.01	907.951	885.756	269.92	200.38	231.533	561.116	627.336	494.449	83.2731	117.57	138.794	174.087	2.06156	2.30889	-0.247325	UBR4	-	chr1_19097195_-
chr9:37899798-37899947:mpeak_78974|chr9_37880745_37904350_SLC25A51_NR_-mpeak_78974|chr9_37888589_37904350_SLC25A51_NM_-||	8.1152	-0.633477	1.78765	-0.354364	0.723066	0.976442	13.7774	8.09466	0	13.4003	19.4245	13.2485	11.2724	1.34911	0	2.87149	5.11172	8.83233	173.292	-1.07484	-0.413908	-0.660934	SLC25A51	chr9:37899797:-	chr9_37899801_-
chr10:75570440-75570506:mpeak_10321|chr10_75562334_75571589_NDST2_NM_-|	20.0438	-0.941882	0.728303	-1.29326	0.195923	0.661055	23.7973	14.8402	18.1088	31.5864	49.0725	35.9602	16.2824	9.44377	7.08605	7.6573	15.3352	11.3558	172.943	-1.0392	-0.0660069	-0.973198	NDST2	chr10:75570445:-	chr10_73810691_-
chr8:95906246-95906345:mpeak_76796|chr8_95893973_95907482_CCNE2_NM_-|	12.4872	-0.475707	1.54672	-0.307558	0.758418	0.981941	18.7874	14.8402	28.3442	20.1004	12.2681	18.2955	5.00996	18.8875	0	0	5.11172	8.20145	172.882	0.290648	0.844006	-0.553358	CCNE2	-	-
chr19:5562643-5562707:mpeak_38734|chr19_5561410_5568045_TINCR_NR_-|	21.9442	0.0699276	0.856393	0.0816536	0.934922	0.994192	12.5249	18.8875	43.3036	25.8434	29.648	35.3293	22.5448	8.09466	12.5974	12.4431	27.6033	14.5103	172.806	-0.281602	-0.335492	0.0538897	TINCR	chr19:5562646:-	chr19_5562636_-
chr7:5399020-5399079:mpeak_71058|chr7_5347943_5463177_TNRC18_NM_-mpeak_71058|chr7_5347943_5463177_TNRC18_NM_-||	70.497	-0.594418	0.994732	-0.597566	0.550129	0.920719	164.076	56.6626	181.088	62.2156	32.715	58.6719	27.5548	134.911	70.0732	6.70014	15.3352	35.9602	172.8	1.38737	2.00346	-0.616087	TNRC18	-	chr7_5359398_-
chr6:18249873-18250034:mpeak_66957|chr6_18225961_18264799_DEK_NM_-|	375.401	0.0291323	0.857232	0.0339842	0.97289	0.998423	338.173	468.141	109.44	551.326	621.586	750.117	145.289	318.39	66.9238	243.119	397.692	494.61	172.587	-1.07035	-1.09752	0.0271761	DEK	-	chr6_18249714_-;chr6_18249795_-
chr4:129003314-129003469:mpeak_60910|chr4_128982420_129131010_LARP1B_NM_+|	11.192	-0.0497265	1.52303	-0.0326497	0.973954	0.998423	21.2923	22.9349	13.3848	15.3146	18.4022	5.67792	5.00996	0	17.3215	0	6.13407	8.83233	171.991	0.548366	0.577348	-0.0289819	LARP1B	-	chr4_128082289_+
chr2:69373437-69373545:mpeak_43741|chr2_69240275_69472356_ANTXR1_NM_+|	10.3328	2.15065	1.97978	1.08631	0.277344	0.755231	21.2923	16.1893	0	0.957163	10.2234	0	1.25249	18.8875	12.5974	17.2289	10.2234	15.1411	171.738	1.74519	-0.379691	2.12488	ANTXR1	chr2:69373497:+;chr2:69373539:+;chr2:69373567:+	chr2_69146321_+;chr2_69146362_+;chr2_69146420_+;chr2_69146450_+
chr1:45499456-45499509:mpeak_2177|chr1_45484988_45672250_ZSWIM5_NM_-|	4.35757	3.51385	2.3889	1.47091	0.141316	0.569702	0	0	15.7468	0	0	0	6.26246	9.44377	11.8101	3.82865	2.04469	3.1544	171.681	Inf	1.60785	Inf	ZSWIM5	chr1:45499458:-	chr1_45033787_-
chr13:100148474-100148530:mpeak_22782|chr13_100140070_100151560_LINC01232_NR_-|	5.37926	3.38877	2.35236	1.44058	0.149703	0.583353	7.51495	4.04733	20.4708	3.82865	5.11172	0	6.26246	0	0	0	12.2681	5.04704	170.503	1.84116	-1.46724	3.30839	LINC01232	chr13:100148473:-	chr13_99496220_-
chr6:42210979-42211034:mpeak_68049|chr6_42196407_42419789_TRERF1_NM_-|	5.17355	0.0931339	1.91026	0.0487546	0.961115	0.99799	0	12.142	5.51137	2.87149	12.2681	0	3.75747	9.44377	2.36202	1.91433	6.13407	5.67792	170.145	0.221614	0.1812	0.040414	TRERF1	-	chr6_42243241_-
chr15:93609480-93609533:mpeak_28841|chr15_93588935_93632443_RGMA_NM_-|	6.03091	-0.199355	1.76256	-0.113105	0.909947	0.994055	1.25249	0	18.8961	7.6573	2.04469	10.0941	8.76744	2.69822	6.29871	0.957163	6.13407	7.57057	170.132	0.0254666	0.276925	-0.251458	RGMA	-	-
chr8:30945286-30945397:mpeak_75429|chr8_30890777_31030510_WRN_NM_+|	15.3539	0.259667	1.36265	0.190561	0.84887	0.991589	27.5548	26.9822	31.4936	9.57163	12.2681	5.67792	1.25249	29.6804	20.4708	0	9.2011	10.0941	167.363	1.64449	1.41363	0.230858	WRN	-	-
chr17:6553449-6553688:mpeak_32974|chr17_6547979_6554954_MED31_NM_-|	50.4339	-0.237314	0.564307	-0.42054	0.674091	0.963844	57.6146	48.568	57.4757	76.573	84.8546	66.2424	15.0299	40.4733	42.5163	31.5864	38.8491	45.4234	166.965	-0.476258	-0.241228	-0.23503	MED31	chr17:6553528:-;chr17:6553636:-	chr17_6650209_-;chr17_6650314_-
chrX:53295503-53295620:mpeak_82453|chrX_53264366_53350522_IQSEC2_NM_-|	22.1751	-0.158926	0.788029	-0.201676	0.84017	0.991589	21.2923	22.9349	26.7695	42.1152	39.8714	18.2955	25.0498	8.09466	9.44807	13.4003	17.3799	21.4499	166.688	-0.49824	-0.29428	-0.20396	IQSEC2	chrX:53295510:-	chrX_53266328_-
chr3:15011807-15011865:mpeak_53305|chr3_14989090_15084340_NR2C2_NM_+mpeak_53305|chr3_14989090_15084340_NR2C2_NM_+||	4.4732	1.78778	2.07574	0.861272	0.389088	0.842199	6.26246	0	0	2.87149	5.11172	6.3088	3.75747	0	0	6.70014	16.3575	6.3088	166.667	-1.19041	-2.96633	1.77593	NR2C2	chr3:15011865:+	chr3_14970351_+
chr20:17596067-17596130:mpeak_48674|chr20_17594865_17662928_RRBP1_NM_-|	90.02	-0.643361	0.46354	-1.38793	0.165158	0.605461	123.997	116.023	136.997	126.345	134.949	83.2762	95.1893	64.7573	66.9238	34.4579	53.1619	44.1616	166.182	0.129828	0.783722	-0.653894	RRBP1	-	-
chr7:129142618-129142674:mpeak_73915|chr7_129142319_129152087_SMKR1_NM_+|	43.7697	-0.870875	0.747024	-1.16579	0.243698	0.725507	86.4219	35.0769	41.729	90.9304	66.4524	40.3764	18.7874	41.8224	37.7923	26.8006	24.5363	14.5103	165.878	-0.276859	0.579569	-0.856428	SMKR1	-	-
chr16:9205860-9205996:mpeak_29598|chr16_9185536_9210524_C16orf72_NM_+|	91.1682	0.0214263	0.61115	0.0350589	0.972033	0.998423	52.6046	129.515	109.44	97.6306	130.86	160.244	45.0897	82.2957	48.815	58.3869	97.1227	82.0145	165.47	-0.414995	-0.430857	0.0158615	C16orf72	chr16:9205889:+;chr16:9205915:+;chr16:9205958:+;chr16:9206000:+	chr16_9112031_+;chr16_9112122_+
chr17:57161579-57161700:mpeak_35482|chr17_57060282_57184266_TRIM37_NM_-|	91.9099	-0.208558	0.630188	-0.330946	0.740686	0.978885	81.4119	78.2484	70.8605	191.433	163.575	126.176	17.5349	78.2484	44.091	76.573	80.7652	94.0012	164.806	-1.06169	-0.845507	-0.216184	TRIM37	-	-
chr8:67509727-67509791:mpeak_76156|chr8_67477060_67525484_MYBL1_NM_-|	7.17781	2.06857	1.45831	1.41847	0.156054	0.592948	18.7874	4.04733	5.51137	7.6573	8.17876	1.89264	7.51495	4.04733	0	5.74298	13.2905	9.46321	163.44	0.677062	-1.30137	1.97843	MYBL1	-	chr8_66597501_-
chr14:58930671-58930917:mpeak_24340|chr14_58894102_59014498_KIAA0586_NM_+|	23.2988	-1.00431	1.1241	-0.893434	0.371625	0.827771	66.382	12.142	10.2354	62.2156	24.5363	17.6647	10.0199	26.9822	17.3215	9.57163	14.3128	8.20145	163.39	-0.234377	0.759639	-0.994017	KIAA0586	chr14:58930799:+	-
chr3:62260372-62260438:mpeak_54726|chr3_62249817_62304622_PTPRG-AS1_NR_-|	20.0862	0.52097	0.929748	0.560335	0.575251	0.931177	18.7874	33.7278	6.29871	18.1861	33.7374	25.2352	18.7874	9.44377	7.87339	18.1861	33.7374	17.0338	162.899	-0.391673	-0.933522	0.541849	PTPRG-AS1	chr3:62260386:-	chr3_62274712_-
chr21:17203753-17203956:mpeak_50499|chr21_17102343_17250621_USP25_NM_+|	9.26	1.526	1.32786	1.14922	0.250465	0.728974	7.51495	12.142	3.93669	9.57163	5.11172	21.4499	0	8.09466	1.57468	16.2718	7.15641	18.2955	162.67	-0.614931	-2.10938	1.49445	USP25	-	chr21_15831484_+;chr21_15831522_+
chr5:37000627-37000680:mpeak_62511|chr5_36876860_37063891_NIPBL_NM_+|	25.9523	0.0913208	1.73751	0.0525585	0.958084	0.997498	0	20.2367	0	12.4431	50.0949	22.0808	3.75747	29.6804	3.93669	34.4579	68.4971	66.2424	162.436	-2.06401	-2.17858	0.11457	NIPBL	-	-
chr7:23658987-23659048:mpeak_71478|chr7_23636997_23682549_CCDC126_NM_+|	13.3216	-1.22592	1.08959	-1.12512	0.260538	0.739882	21.2923	4.04733	16.5341	23.9291	27.6033	22.0808	3.75747	18.8875	3.14936	5.74298	7.15641	5.67792	162.337	-0.813917	0.473515	-1.28743	CCDC126	-	-
chr8:33354169-33354265:mpeak_75449|chr8_33342684_33355949_MAK16_NM_+|	23.2216	0.263703	1.09266	0.241341	0.809291	0.988479	45.0897	17.5384	13.3848	44.0295	24.5363	21.4499	23.7973	21.5858	1.57468	19.1433	27.6033	18.9264	161.875	-0.243933	-0.483936	0.240003	MAK16	-	chr8_33496686_+;chr8_33496708_+
chr13:96519543-96519652:mpeak_22678|chr13_96454066_96705736_UGGT2_NM_-|	12.5303	-1.23565	0.911622	-1.35544	0.175276	0.626199	15.0299	18.8875	9.44807	23.9291	21.4692	18.2955	2.50498	14.8402	9.44807	3.82865	5.11172	7.57057	161.852	-0.554606	0.698448	-1.25305	UGGT2	-	chr13_95867337_-
chr4:129029982-129030065:mpeak_60913|chr4_128982420_129131010_LARP1B_NM_+|	11.3852	-0.33276	1.56461	-0.21268	0.831577	0.991589	15.0299	6.74555	32.2809	11.486	17.3799	16.4029	5.00996	0	17.3215	0	6.13407	8.83233	161.376	0.25595	0.577348	-0.321398	LARP1B	chr4:129030056:+	chr4_128108846_+;chr4_128108863_+;chr4_128108913_+
chr1:233231397-233231453:mpeak_8012|chr1_233120223_233431459_PCNXL2_NM_-|	6.8716	0.901168	1.41693	0.636001	0.524776	0.910128	13.7774	4.04733	10.2354	8.61446	7.15641	1.89264	2.50498	13.4911	1.57468	1.91433	7.15641	10.0941	159.698	0.667749	-0.125284	0.793033	PCNXL2	chr1:233231401:-	-
chr5:140038513-140038733:mpeak_65204|chr5_140027383_140041886_IK_NM_+|	269.951	-0.523345	0.535999	-0.976392	0.32887	0.795379	463.422	288.71	376.348	358.936	316.927	298.406	142.784	353.467	214.156	108.159	179.933	138.163	158.85	0.211987	0.73693	-0.524942	IK	-	chr5_140659073_+;chr5_140659107_+;chr5_140659147_+
chr5:86670649-86670707:mpeak_63759|chr5_86564069_86686616_RASA1_NM_+|	17.5126	0.917871	1.23987	0.740296	0.45912	0.879107	21.2923	37.7751	1.57468	19.1433	17.3799	13.8794	2.50498	21.5858	14.1721	16.2718	22.4916	22.0808	158.488	0.266825	-0.669175	0.936	RASA1	-	-
chr15:40862196-40862268:mpeak_26536|chr15_40861491_40865725_RPUSD2_NM_+|	9.1805	-0.495472	1.06779	-0.464015	0.642637	0.955026	6.26246	14.8402	18.8961	7.6573	10.2234	12.6176	2.50498	9.44377	13.3848	6.70014	5.11172	2.52352	157.889	0.391225	0.821467	-0.430242	RPUSD2	chr15:40862266:+	chr15_40570064_+
chr10:79795262-79795334:mpeak_10448|chr10_79793517_79814288_RPS24_NM_+|	13.3248	-3.04099	1.68873	-1.80075	0.0717418	0.410005	33.8173	12.142	4.72403	47.8581	8.17876	27.1279	0	12.142	9.44807	3.82865	0	0.63088	156.502	-0.714462	2.2754	-2.98987	RPS24	chr10:79795333:+;chr10:79795378:+	-
chr10:17641057-17641331:mpeak_8919|chr10_17632445_17659373_HACD1_NM_-|	75.1177	0.832544	0.46194	1.80228	0.0715018	0.410005	80.1594	98.4851	77.9465	82.316	78.7205	62.4572	61.3721	35.0769	67.7111	72.7444	96.1004	88.3233	156.305	0.199237	-0.647608	0.846845	HACD1	chr10:17641073:-;chr10:17641196:-;chr10:17641268:-	chr10_17599077_-;chr10_17599119_-;chr10_17599198_-;chr10_17599270_-
chr8:133836257-133836320:mpeak_77800|chr8_133787603_133858025_PHF20L1_NM_+|	5.6408	1.54368	1.58829	0.971909	0.331096	0.798184	5.00996	10.7929	0	2.87149	6.13407	5.04704	0	5.39644	4.72403	5.74298	11.2458	10.725	156.147	0.169347	-1.45332	1.62267	PHF20L1	-	-
chr5:134260139-134260549:mpeak_64949|chr5_134240809_134296275_PCBD2_NM_+|	154.086	-0.252869	0.589689	-0.428817	0.668056	0.963844	211.671	117.373	135.422	285.234	154.374	267.493	65.1295	138.958	93.6933	91.8876	128.815	158.982	155.976	-0.606345	-0.35055	-0.255795	PCBD2	chr5:134260287:+;chr5:134260313:+;chr5:134260393:+	chr5_134924615_+;chr5_134924743_+
chr16:8904950-8905040:mpeak_29557|chr16_8891669_8941580_PMM2_NM_+|	207.51	0.23885	0.44869	0.532327	0.594499	0.938771	274.296	188.875	258.247	262.263	261.72	218.916	127.754	176.733	158.255	209.619	231.05	122.391	155.901	-0.042329	-0.283077	0.240748	PMM2	chr16:8905035:+	chr16_8811143_+
chr6:18256595-18256693:mpeak_66959|chr6_18225961_18264799_DEK_NM_-|	410.681	-0.472907	0.774272	-0.610776	0.541348	0.917346	241.731	400.686	177.939	657.571	735.066	1049.15	145.289	318.39	66.9238	243.119	397.692	494.61	154.608	-1.57362	-1.09752	-0.476095	DEK	-	chr6_18256429_-
chr16:524067-524235:mpeak_29045|chr16_475667_570725_RAB11FIP3_NM_+|	7.70296	0.97908	1.38481	0.707016	0.479557	0.88622	11.2724	17.5384	5.51137	5.74298	3.06703	6.3088	1.25249	1.34911	19.6835	5.74298	6.13407	8.83233	154.014	1.1828	0.105794	1.077	RAB11FIP3	chr16:524154:+;chr16:524234:+	chr16_474153_+;chr16_474234_+
chr16:75445733-75445858:mpeak_31817|chr16_75327940_75467387_CFDP1_NM_-|	194.314	0.198181	0.733977	0.270009	0.787153	0.983501	256.761	188.875	201.559	214.404	210.603	298.406	73.897	281.964	66.1365	144.532	195.268	199.358	153.365	-0.160621	-0.353473	0.192852	CFDP1	-	chr16_75411943_-
chr8:30608979-30609041:mpeak_75419|chr8_30601681_30623742_UBXN8_NM_+|	131.773	-0.411396	0.750673	-0.548037	0.583667	0.933526	220.438	49.9171	152.744	262.263	163.575	165.922	57.6146	144.355	74.7972	85.1875	94.0557	110.404	152.872	-0.484014	-0.0656273	-0.418387	UBXN8	-	chr8_30751518_+
chr15:78883661-78884012:mpeak_28352|chr15_78857861_78885433_CHRNA5_NM_+|	48.0151	0.178691	0.489847	0.364789	0.715269	0.975655	58.8671	55.3135	85.8199	47.8581	48.0502	45.4234	52.6046	45.8698	33.0682	30.6292	39.8714	32.8058	152.042	0.500919	0.3486	0.152318	CHRNA5	chr15:78883797:+;chr15:78883882:+;chr15:78883968:+	chr15_78591454_+;chr15_78591562_+;chr15_78591622_+;chr15_78591703_+
chr17:36003357-36003415:mpeak_34279|chr17_35974398_36003493_DDX52_NM_-|	43.3735	-0.0309578	0.77092	-0.040157	0.967968	0.99838	71.392	26.9822	40.9416	102.416	33.7374	40.3764	28.8073	41.8224	21.2581	41.158	33.7374	37.8528	151.615	-0.341555	-0.295158	-0.0463972	DDX52	-	-
chr2:142887163-142887259:mpeak_45689|chr2_140990895_142889270_LRP1B_NM_-|	8.8605	-0.695261	2.40638	-0.288924	0.772639	0.982625	26.3023	4.04733	0	15.3146	21.4692	18.2955	10.0199	0	0	0	2.04469	8.83233	151.446	-0.859832	-0.11841	-0.741422	LRP1B	-	-
chr13:114150053-114150345:mpeak_22976|chr13_114145307_114203739_TMCO3_NM_+|	41.6211	-0.426172	1.06061	-0.40182	0.687817	0.966593	66.382	25.6331	62.1998	68.9157	48.0502	47.316	13.7774	75.5502	12.5974	12.4431	17.3799	49.2087	151.302	-0.0912318	0.367006	-0.458237	TMCO3	-	-
chr16:3178829-3178887:mpeak_29353|chr16_3175967_3184883_ZNF213-AS1_NR_-|	6.27416	0.112495	1.78188	0.0631327	0.949661	0.997123	13.7774	2.69822	10.2354	2.87149	4.08938	10.725	10.0199	1.34911	6.29871	0.957163	12.2681	0	151.185	0.594841	0.417818	0.177023	ZNF213-AS1	chr16:3178834:-	chr16_3128836_-
chr9:127685369-127685492:mpeak_80742|chr9_127642889_127703386_GOLGA1_NM_-|	8.1315	-0.0567338	1.32242	-0.0429015	0.96578	0.998315	3.75747	10.7929	12.5974	16.2718	10.2234	5.04704	2.50498	1.34911	14.1721	11.486	3.06703	6.3088	150.602	-0.216452	-0.210768	-0.00568336	GOLGA1	-	-
chr12:64615477-64615532:mpeak_18689|chr12_64581432_64616076_C12orf66_NM_-|	8.40418	0.407937	1.32553	0.307754	0.758269	0.981941	10.0199	16.1893	2.36202	13.4003	13.2905	1.89264	3.75747	12.142	3.14936	5.74298	8.17876	10.725	149.99	-0.000612298	-0.371693	0.37108	C12orf66	chr12:64615479:-	chr12_64221702_-
chr3:122255139-122255202:mpeak_55777|chr3_122247590_122283523_PARP9_NM_-|	49.1975	-0.701978	0.902893	-0.777477	0.436878	0.868357	78.9069	101.183	74.7972	44.0295	32.715	41.6381	30.0598	95.7868	44.091	8.61446	5.11172	33.4367	149.989	1.1064	1.84928	-0.742879	PARP9	-	-
chr3:20206554-20206611:mpeak_53487|chr3_20202718_20227725_SGOL1_NM_-|	5.74544	1.18886	1.49754	0.793877	0.427267	0.861989	10.0199	2.69822	7.87339	8.61446	8.17876	3.78528	3.75747	5.39644	0	1.91433	4.08938	12.6176	149.965	0.000913525	-1.02449	1.02541	SGOL1	chr3:20206553:-	-
chr10:24834149-24834256:mpeak_9088|chr10_23983674_24834755_KIAA1217_NM_+|	8.91179	-0.758039	1.79016	-0.423447	0.671969	0.963844	8.76744	17.5384	22.8328	1.91433	15.3352	11.3558	3.75747	0	18.1088	0	1.02234	6.3088	149.816	0.780575	1.5766	-0.796021	KIAA1217	chr10:24834201:+;chr10:24834245:+	chr10_24545271_+;chr10_24545315_+;chr10_24545354_+
chr4:41648136-41648290:mpeak_59206|chr4_41361623_41699176_LIMCH1_NM_+|	9.72432	-1.07367	1.32762	-0.808718	0.418677	0.861663	12.5249	5.39644	14.9594	15.3146	6.13407	25.8661	5.00996	16.1893	0.787339	7.6573	3.06703	3.78528	149.549	-0.525046	0.599617	-1.12466	LIMCH1	-	chr4_41646217_+
chr10:128931692-128931754:mpeak_12102|chr10_128593977_129249595_DOCK1_NM_+|	4.32675	-0.308184	2.11508	-0.145708	0.884152	0.993065	7.51495	0	3.14936	16.2718	0	0.63088	2.50498	2.69822	5.51137	0.957163	5.11172	7.57057	149.296	-0.664459	-0.348211	-0.316248	DOCK1	chr10:128931751:+	chr10_127133486_+
chr2:153246254-153246387:mpeak_45839|chr2_153191750_153504309_FMNL2_NM_+|	10.2635	1.38109	1.37146	1.00703	0.313923	0.789552	18.7874	5.39644	2.36202	19.1433	6.13407	3.1544	1.25249	9.44377	7.08605	14.3574	26.581	9.46321	149.282	-0.0990165	-1.50303	1.40401	FMNL2	chr2:153246281:+	-
chr2:55470597-55470814:mpeak_43404|chr2_55463956_55496384_MTIF2_NM_-|	81.6218	0.298774	0.664753	0.449451	0.653106	0.958963	93.9368	51.2662	36.2176	128.26	133.927	109.773	52.6046	44.5206	24.4075	61.2584	111.436	131.854	149.277	-1.03581	-1.32532	0.289515	MTIF2	-	chr2_55243499_-
chr10:126268802-126268852:mpeak_11991|chr10_126150340_126301832_LHPP_NM_+|	5.50305	4.17244	2.27373	1.83506	0.0664962	0.392961	0	0	16.5341	0	0	0	13.7774	10.7929	8.66073	3.82865	6.13407	6.3088	149.265	Inf	1.03018	Inf	LHPP	chr10:126268853:+	chr10_124580286_+
chr1:190443657-190443791:mpeak_6670|chr1_190068264_190446759_BRINP3_NM_-|	5.70729	0.0589958	1.59481	0.0369923	0.970491	0.998392	3.75747	0	0	5.74298	11.2458	6.3088	0	2.69822	2.36202	10.5288	8.17876	17.6647	148.51	-2.63234	-2.84556	0.213215	BRINP3	-	-
chr12:44177479-44177538:mpeak_17407|chr12_44152746_44180482_IRAK4_NM_+|	37.1362	-0.0466084	0.805782	-0.0578424	0.953874	0.997153	45.0897	39.1242	7.87339	53.6011	78.7205	42.8999	23.7973	16.1893	22.0455	35.415	39.8714	41.0072	148.451	-0.928106	-0.906685	-0.0214214	IRAK4	-	-
chr9:131004562-131004627:mpeak_80918|chr9_130965633_131016287_DNM1_NM_+|	6.22706	0.191291	2.11522	0.0904354	0.927941	0.994192	0	0	16.5341	6.70014	1.02234	0	6.26246	6.74555	20.4708	4.78581	7.15641	5.04704	148.16	1.09831	0.978625	0.119684	DNM1	-	chr9_128242345_+
chr17:26939263-26939314:mpeak_33781|chr17_26937717_26941211_SGK494_NM_-|	7.35893	1.81184	1.75467	1.03258	0.301801	0.776325	0	0	13.3848	2.87149	0	3.1544	11.2724	4.04733	11.8101	14.3574	12.2681	15.1411	148.008	1.15134	-0.622473	1.77382	SGK494	-	-
chrX:44386488-44386619:mpeak_82216|chrX_44383521_44402221_FUNDC1_NM_-|	184.445	-0.241735	0.453569	-0.532963	0.594059	0.938736	229.206	159.195	166.128	321.607	230.028	265.601	160.319	101.183	113.377	112.945	175.843	177.908	147.922	-0.559487	-0.316061	-0.243426	FUNDC1	-	chrX_44527261_-
chr6:159420323-159420378:mpeak_70560|chr6_159398880_159421198_RSPH3_NM_-|	5.25012	0.591636	1.24069	0.476861	0.633461	0.951509	8.76744	2.69822	5.51137	4.78581	9.2011	3.1544	2.50498	2.69822	6.29871	3.82865	4.08938	9.46321	147.602	-0.0138938	-0.595657	0.581763	RSPH3	chr6:159420321:-	chr6_158999291_-
chr3:121710878-121710940:mpeak_55742|chr3_121707255_121741127_ILDR1_NM_-|	6.63728	-0.554888	1.69279	-0.327796	0.743066	0.978885	0	14.8402	14.9594	7.6573	5.11172	7.57057	0	10.7929	9.44807	3.82865	1.02234	4.41616	147.225	0.551005	1.12708	-0.576073	ILDR1	chr3:121710888:-	chr3_121992043_-
chr12:53936667-53936727:mpeak_18082|chr12_53901811_54020199_ATF7_NR_-mpeak_18082|chr12_53911138_54020199_ATF7_NM_-||	18.4472	-0.486493	1.01721	-0.47826	0.632465	0.951451	18.7874	32.3786	11.8101	14.3574	40.8938	22.7117	17.5349	13.4911	11.8101	19.1433	2.04469	16.4029	147.017	-0.307984	0.188445	-0.496429	ATF7	chr12:53936674:-	chr12_53542899_-
chr5:57754807-57754883:mpeak_62899|chr5_57750601_57755966_PLK2_NM_-|	53.5701	-0.115348	0.699927	-0.1648	0.869101	0.991868	92.6843	29.6804	67.7111	77.5302	51.1172	70.0277	45.0897	51.2662	33.0682	28.7149	64.4077	31.544	146.863	-0.0638356	0.0540312	-0.117867	PLK2	-	chr5_58459034_-
chr8:101281127-101281186:mpeak_77008|chr8_101271474_101348446_RNF19A_NM_-|	55.1077	-0.378747	0.73906	-0.512471	0.608322	0.942766	55.1096	18.8875	76.3719	108.159	80.7652	78.8601	18.7874	31.0295	52.7517	43.0723	47.0279	50.4704	146.603	-0.832566	-0.454706	-0.37786	RNF19A	-	-
chr5:141314942-141315112:mpeak_65383|chr5_141303384_141318085_KIAA0141_NM_+|	79.9677	0.600649	0.533582	1.12569	0.260296	0.739882	75.1495	91.7395	136.997	63.1727	92.011	65.6116	72.6445	56.6626	78.7339	64.1299	59.296	103.464	146.07	0.46082	-0.125127	0.585947	KIAA0141	chr5:141315000:+;chr5:141315048:+;chr5:141315113:+	chr5_141935433_+;chr5_141935481_+;chr5_141935546_+
chr3:184024135-184024247:mpeak_57619|chr3_184016885_184026495_PSMD2_NM_+|	1430.28	-0.331097	0.441517	-0.749909	0.453309	0.877154	2000.23	1721.46	2702.15	1499.87	1564.19	1032.75	1272.53	1191.26	1943.94	848.046	742.222	644.76	145.74	0.648934	0.979744	-0.33081	PSMD2	chr3:184024216:+	chr3_184306411_+;chr3_184306433_+;chr3_184306462_+
chr7:20197811-20198061:mpeak_71415|chr7_20180781_20257013_MACC1_NM_-|	10.3145	0.131379	2.30123	0.0570907	0.954473	0.997357	17.5349	0	0	0.957163	0	20.1882	2.50498	20.2367	13.3848	22.0147	6.13407	20.8191	145.613	-0.270112	-0.438782	0.16867	MACC1	-	-
chr6:30689598-30689652:mpeak_67434|chr6_30687977_30691715_TUBB_NR_+mpeak_67434|chr6_30687977_30691116_TUBB_NM_+||	5.59251	0.879829	2.10041	0.418884	0.675301	0.963844	12.5249	1.34911	0	14.3574	3.06703	1.89264	8.76744	0	0.787339	14.3574	3.06703	6.93969	145.205	-0.477494	-1.35047	0.872973	TUBB	-	-
chr8:145269345-145269420:mpeak_78109|chr8_145202918_145316557_MROH1_NM_+|	14.9385	-2.11732	1.19995	-1.7645	0.077647	0.429192	6.26246	41.8224	29.9189	11.486	19.4245	9.46321	13.7774	18.8875	21.2581	2.87149	4.08938	0	144.657	0.950127	2.95356	-2.00344	MROH1	chr8:145269399:+;chr8:145269434:+	chr8_144214469_+;chr8_144214493_+
chr3:62260927-62261026:mpeak_54729|chr3_62249817_62304622_PTPRG-AS1_NR_-|	19.2579	0.459755	0.785519	0.585288	0.558354	0.922948	23.7973	9.44377	18.8961	27.7577	26.581	19.5573	18.7874	9.44377	7.87339	18.1861	33.7374	17.0338	144.406	-0.503182	-0.933522	0.430341	PTPRG-AS1	chr3:62260975:-	chr3_62275301_-
chr3:167728523-167728596:mpeak_57169|chr3_167728206_167813713_GOLIM4_NM_-|	28.3851	0.88228	0.929332	0.949369	0.342433	0.8076	46.3422	47.2189	11.8101	28.7149	23.5139	18.9264	10.0199	37.7751	25.1948	40.2008	14.3128	36.5911	144.364	0.566438	-0.31983	0.886268	GOLIM4	-	chr3_168010748_-
chr10:126187026-126187086:mpeak_11984|chr10_126150340_126301832_LHPP_NM_+|	10.8299	-0.454954	0.964308	-0.471793	0.637075	0.952371	5.00996	26.9822	15.7468	9.57163	14.3128	8.83233	13.7774	10.7929	8.66073	3.82865	6.13407	6.3088	143.658	0.545136	1.03018	-0.485045	LHPP	chr10:126187084:+	chr10_124498476_+;chr10_124498514_+
chr2:44001990-44002137:mpeak_43127|chr2_44001177_44036843_DYNC2LI1_NM_+|	10.0616	-0.683215	1.65397	-0.413077	0.67955	0.964494	0	18.8875	0	6.70014	12.2681	7.57057	10.0199	16.1893	13.3848	3.82865	17.3799	14.5103	143.109	-0.49067	0.1486	-0.63927	DYNC2LI1	chr2:44002129:+	chr2_43774987_+
chr3:136221465-136221606:mpeak_56348|chr3_136057119_136471245_STAG1_NM_-|	25.3842	0.612395	0.685415	0.893466	0.371608	0.827771	20.0399	14.8402	22.0455	38.2865	32.715	30.9131	7.51495	22.9349	9.44807	35.415	43.9608	26.497	142.678	-0.840213	-1.40795	0.567735	STAG1	-	chr3_136502697_-
chr21:30250506-30250583:mpeak_50603|chr21_30245061_30257695_N6AMT1_NR_-mpeak_50603|chr21_30248813_30257695_N6AMT1_NM_-||	6.24323	1.04928	1.28156	0.818751	0.412928	0.856887	7.51495	6.74555	9.44807	4.78581	1.02234	8.20145	7.51495	6.74555	2.36202	2.87149	13.2905	4.41616	142.629	0.758992	-0.307973	1.06697	N6AMT1	chr21:30250514:-	-
chr19:12401784-12401897:mpeak_39245|chr19_12384878_12405714_ZNF44_NM_-|	4.71451	1.37498	1.51958	0.904843	0.365548	0.824604	12.5249	2.69822	3.93669	4.78581	2.04469	6.3088	6.26246	2.69822	0	2.87149	6.13407	6.3088	142.547	0.544195	-0.773206	1.3174	ZNF44	chr19:12401783:-;chr19:12401843:-	chr19_12290969_-;chr19_12291030_-
chr1:1630058-1630160:mpeak_123|chr1_1571218_1655859_CDK11B_NM_-|	37.8366	0.309355	0.777706	0.397779	0.690793	0.967094	15.0299	68.8046	50.3897	28.7149	33.7374	58.041	36.3222	35.0769	22.8328	41.158	36.8044	27.1279	142.44	0.155692	-0.157341	0.313033	CDK11B	-	-
chrX:107938303-107938353:mpeak_83291|chrX_107683073_107939526_COL4A5_NM_+|	4.20392	3.5881	2.5014	1.43444	0.151447	0.587538	0	0	12.5974	0	0	0	8.76744	10.7929	7.08605	0.957163	2.04469	8.20145	141.829	Inf	1.25002	Inf	COL4A5	-	chrX_108695102_+
chr12:122240373-122240481:mpeak_20671|chr12_122233632_122241390_LINC01089_NR_-|	4.31163	-0.279283	1.70129	-0.164159	0.869606	0.991868	2.50498	6.74555	0	6.70014	7.15641	8.83233	2.50498	4.04733	0	7.6573	3.06703	2.52352	141.18	-1.29438	-1.01568	-0.278694	LINC01089	chr12:122240368:-;chr12:122240403:-;chr12:122240430:-	chr12_121802483_-
chr8:17869166-17869313:mpeak_75026|chr8_17780365_17885145_PCM1_NM_+|	57.7181	-0.00199911	0.838708	-0.00238356	0.998098	0.99994	48.8472	74.2011	11.8101	88.059	100.19	82.0145	42.5847	36.426	16.5341	79.4445	66.4524	46.0543	141.147	-1.00292	-1.00649	0.00356953	PCM1	-	chr8_18011706_+
chr10:11799848-11799903:mpeak_8686|chr10_11784355_11805222_ECHDC3_NM_+|	15.8243	-0.0610572	1.03644	-0.0589106	0.953023	0.997123	32.5648	16.1893	14.9594	9.57163	14.3128	23.9735	2.50498	26.9822	15.7468	7.6573	15.3352	10.0941	140.853	0.412842	0.451161	-0.0383188	ECHDC3	chr10:11799899:+	chr10_11757899_+
chr22:31736660-31736718:mpeak_52103|chr22_31723295_31742249_PATZ1_NM_-|	27.9076	-0.85213	0.878939	-0.969499	0.332296	0.799271	17.5349	22.9349	62.1998	26.8006	41.9161	45.4234	25.0498	9.44377	38.5796	15.3146	13.2905	16.4029	140.502	-0.152798	0.699162	-0.851959	PATZ1	chr22:31736665:-	chr22_31340681_-;chr22_31340711_-;chr22_31340733_-
chr3:57850269-57850381:mpeak_54666|chr3_57742982_57913022_SLMAP_NM_+|	33.1869	-0.125216	1.19411	-0.104862	0.916486	0.994055	17.5349	48.568	3.93669	54.5583	46.0055	68.1351	13.7774	33.7278	2.36202	38.2865	34.7597	36.5911	140.452	-1.26821	-1.13658	-0.131633	SLMAP	-	chr3_57864551_+;chr3_57864590_+
chr10:46240259-46240321:mpeak_9580|chr10_46222647_46287708_FAM21C_NM_+|	29.2066	0.546617	0.593463	0.921063	0.357017	0.821453	60.1196	45.8698	47.2403	16.2718	14.3128	12.6176	31.3123	43.1715	34.6429	9.57163	21.4692	13.8794	140.414	1.82652	1.28057	0.545952	FAM21C	-	-
chr1:114290952-114291225:mpeak_4013|chr1_114240347_114301777_PHTF1_NM_-|	16.5966	-0.485748	1.35362	-0.358852	0.719705	0.97626	20.0399	20.2367	15.7468	20.1004	31.6927	35.9602	0	24.284	2.36202	10.5288	3.06703	15.1411	140.167	-0.647426	-0.108988	-0.538438	PHTF1	chr1:114290942:-	chr1_113748325_-
chr5:37381693-37381794:mpeak_62548|chr5_37379411_37752587_WDR70_NM_+|	20.7293	0.19697	0.796684	0.247238	0.804724	0.987914	18.7874	39.1242	29.1315	19.1433	22.4916	13.2485	23.7973	20.2367	18.1088	26.8006	7.15641	10.725	140.07	0.665362	0.475895	0.189467	WDR70	-	chr5_37381675_+
chr12:69965048-69965218:mpeak_18937|chr12_69864128_69967784_FRS2_NM_+|	106.025	0.909483	0.479952	1.89495	0.0580994	0.366206	95.1893	93.0886	58.2631	136.874	115.525	109.142	77.6545	44.5206	54.3264	137.831	149.262	200.62	139.682	-0.552334	-1.46635	0.914021	FRS2	-	-
chr20:57408848-57408995:mpeak_50163|chr20_57394310_57425958_GNAS-AS1_NR_-|	6.50207	0.473596	1.20115	0.394287	0.693369	0.968354	5.00996	10.7929	10.2354	2.87149	8.17876	5.67792	10.0199	4.04733	4.72403	0.957163	9.2011	6.3088	138.566	0.638353	0.190481	0.447872	GNAS-AS1	chr20:57408864:-	chr20_58833810_-
chr20:10019559-10019635:mpeak_48568|chr20_10015646_10036149_ANKEF1_NM_+|	32.8457	-0.195463	0.810568	-0.241143	0.809444	0.988479	32.5648	37.7751	29.1315	42.1152	54.1843	40.3764	7.51495	47.2189	17.3215	22.9719	40.8938	22.0808	138.049	-0.458404	-0.254335	-0.204069	ANKEF1	chr20:10019620:+	chr20_10038985_+
chr3:9433291-9433519:mpeak_53006|chr3_9432181_9439174_THUMPD3-AS1_NR_-|	30.5437	0.0273658	0.856965	0.0319334	0.974525	0.998423	46.3422	47.2189	14.9594	34.4579	32.715	35.9602	41.3322	29.6804	7.87339	23.9291	25.5586	26.497	137.566	0.0734602	0.0540615	0.0193987	THUMPD3-AS1	chr3:9433306:-	chr3_9391591_-;chr3_9391816_-
chr21:41160607-41160669:mpeak_51007|chr21_41117333_41173188_IGSF5_NM_+|	11.9266	-0.226919	0.963793	-0.235444	0.813864	0.988479	25.0498	5.39644	7.87339	14.3574	19.4245	13.8794	13.7774	9.44377	4.72403	10.5288	9.2011	9.46321	137.124	-0.314736	-0.0630264	-0.251709	IGSF5	-	-
chr15:41576252-41576381:mpeak_26588|chr15_41576200_41590238_OIP5-AS1_NR_+|	208.562	-0.754092	0.512264	-1.47208	0.141	0.569702	199.146	94.4377	143.296	476.667	400.759	343.199	132.764	116.023	70.8605	180.904	147.218	197.466	136.675	-1.48231	-0.717445	-0.764868	OIP5-AS1	-	chr15_41284108_+
chr13:34409524-34409590:mpeak_21759|chr13_34392205_34540223_RFC3_NM_+|	3.75872	2.04221	1.59942	1.27685	0.201656	0.667548	8.76744	2.69822	4.72403	0.957163	3.06703	3.1544	2.50498	5.39644	0	4.78581	7.15641	1.89264	136.597	1.1733	-0.808124	1.98143	RFC3	-	chr13_33835437_+;chr13_33835468_+
chr22:26043660-26043723:mpeak_51875|chr22_25960860_26118255_ADRBK2_NM_+|	38.6283	-0.943199	0.907998	-1.03877	0.298913	0.774346	31.3123	28.3313	33.8556	86.1446	52.1396	79.4909	43.8372	2.69822	22.0455	30.6292	34.7597	18.2955	136.334	-1.21981	-0.287153	-0.932661	ADRBK2	-	chr22_25647745_+
chr10:120801494-120801656:mpeak_11804|chr10_120795780_120840334_EIF3A_NM_-|	400.068	-0.296578	0.677538	-0.437729	0.661583	0.961342	743.98	725.821	312.574	465.181	364.977	236.58	392.03	681.301	239.351	168.461	253.541	217.023	135.781	0.740594	1.03857	-0.297978	EIF3A	chr10:120801561:-	-
chr20:62695407-62695496:mpeak_50439|chr20_62688438_62703524_TCEA2_NM_+|	180.123	-0.730861	0.642056	-1.13831	0.25499	0.732842	293.083	116.023	150.382	370.422	244.34	208.821	156.561	76.8993	178.726	115.817	105.301	145.103	135.737	-0.557808	0.170584	-0.728392	TCEA2	chr20:62695426:+;chr20:62695476:+;chr20:62695536:+	chr20_64064084_+;chr20_64064122_+;chr20_64064184_+
chr7:155493460-155493571:mpeak_74641|chr7_155437202_155567686_RBM33_NM_+|	16.1937	1.3812	0.939626	1.46994	0.141577	0.569861	13.7774	33.7278	7.87339	9.57163	9.2011	14.5103	8.76744	24.284	7.87339	19.1433	23.5139	22.0808	135.318	0.734543	-0.661637	1.39618	RBM33	-	chr7_155700819_+;chr7_155700830_+;chr7_155700864_+
chr8:66636479-66636571:mpeak_76139|chr8_66631730_66753969_PDE7A_NM_-|	11.1088	0.373761	1.05657	0.353749	0.723527	0.976442	26.3023	8.09466	10.2354	12.4431	5.11172	10.725	13.7774	12.142	7.08605	17.2289	5.11172	5.04704	135.227	0.658319	0.269176	0.389142	PDE7A	-	chr8_65724314_-
chr8:30404959-30405045:mpeak_75394|chr8_30242016_30428153_RBPMS_NM_+|	46.3391	-0.302275	0.690201	-0.437952	0.661421	0.961342	45.0897	59.3609	83.4579	45.9438	42.9385	53.6248	43.8372	18.8875	76.3719	31.5864	26.581	28.3896	135.092	0.398996	0.684366	-0.28537	RBPMS	chr8:30405036:+	chr8_30547455_+
chr5:134260834-134261824:mpeak_64951|chr5_134240809_134296275_PCBD2_NM_+|	169.199	-0.889757	0.507804	-1.75217	0.0797454	0.436849	129.007	149.751	122.825	242.162	344.53	364.649	65.1295	138.958	93.6933	91.8876	128.815	158.982	134.858	-1.24427	-0.35055	-0.893716	PCBD2	chr5:134261123:+;chr5:134261174:+;chr5:134261397:+;chr5:134261424:+;chr5:134261644:+;chr5:134261675:+	chr5_134925185_+;chr5_134925704_+;chr5_134925984_+;chr5_134926012_+
chr12:49718073-49718188:mpeak_17705|chr12_49716970_49725355_TROAP_NM_+|	62.2374	-0.758638	0.589823	-1.28621	0.198368	0.664333	78.9069	55.3135	51.177	121.56	78.7205	90.8468	30.0598	37.7751	70.8605	42.1152	54.1843	35.3293	133.672	-0.651027	0.0754452	-0.726472	TROAP	chr12:49718115:+;chr12:49718160:+;chr12:49718197:+	chr12_49324393_+
chr2:112995883-112995976:mpeak_45028|chr2_112974045_113012664_ZC3H8_NM_-|	28.3771	1.05928	0.730161	1.45075	0.146849	0.580332	25.0498	21.5858	19.6835	28.7149	32.715	27.7587	13.7774	29.6804	6.29871	43.0723	56.229	35.9602	133.287	-0.427437	-1.44279	1.01536	ZC3H8	-	-
chr19:5604585-5604721:mpeak_38741|chr19_5587410_5622938_SAFB2_NM_-|	106.679	-0.917205	0.541151	-1.69491	0.0900918	0.460575	177.854	184.828	144.87	81.3588	96.1004	103.464	80.1594	192.923	107.865	35.415	28.6256	46.6852	133.234	0.853378	1.7826	-0.929223	SAFB2	chr19:5604594:-	chr19_5604631_-
[truncated: 5,326 more rows]
