# Supplementary material for: Compartment-specific and ELAVL1-coordinated regulation of intronic polyadenylation isoforms by doxorubicin
Source: HighWire-hosted journal article supplement (doi:10.1101/gr.276192.121), 2022-07-01
Supplement: Supplemental_Table_S13.xlsx.xlsx [file Supplemental_Table_S13.xlsx.xlsx]

## Sheet: Sheet1
Supplemental Table S13 : 3’-seq data set of IPA:LE isoform ratio regulation in polysomes versus cytosol in MCF-7 cells treated with doxorubicin for 18 hours.
IPA peaks	baseMean	log2FoldChange IPA:LE	lfcSE	stat	pvalue	padj	8	17	29	3	13	23	LE.08	LE.17	LE.29	LE.03	LE.13	LE.23	%IPA (Poly)	log2FC_IPA	log2FC_LE	log2FC IPA-logFC LE	gene	Tian polyA site	Zavolan polyA site
chr3:143236323-143236460:mpeak_55223|chr3_142985771_143567373_SLC9A9_NM_-|	117.464	-4.55358	2.31613	-1.96603	0.0492954	0.620896	207.582	259.765	190.662	258.028	248.853	237.931	0	6.7413	0	0	0	0	3253.62	-0.178771	Inf	-Inf	SLC9A9	-	chr3_143517504_-
chr19:47527694-47527770:mpeak_39485|chr19_47524142_47548448_NPAS1_NM_+|	229.017	-7.4913	2.62313	-2.85587	0.00429192	0.20804	483.237	128.085	20.0697	632.512	742.943	721.137	0	20.2239	0	0	0	0	1040.67	-1.73144	Inf	-Inf	NPAS1	-	chr19_47024486_+
chr14:32953389-32954334:mpeak_23000|chr14_32798478_33299053_AKAP6_NM_+|	3911.63	-24.998	3.27953	-7.62242	2.48972e-14	3.08103e-11	7959.54	1728.92	75.2615	15693.3	9362.38	11237.1	0	0	883.068	0	0	0	368.553	-1.89418	Inf	-Inf	AKAP6	-	chr14_32484842_+;chr14_32484944_+;chr14_32485032_+;chr14_32485078_+;chr14_32485123_+
chr17:35500756-35500895:mpeak_32993|chr17_35444374_35766902_ACACA_NM_-|	335.826	-3.64513	1.53323	-2.37741	0.0174345	0.416912	608.458	128.534	50.1743	1094.53	797.199	868.742	72.2755	179.319	125.436	41.863	33.2769	30.1086	208.781	-1.81017	1.84088	-3.65105	ACACA	-	-
chr1:237766398-237766624:mpeak_8389|chr1_237205701_237995851_RYR2_NM_+|	195.71	-9.11405	3.05118	-2.98706	0.00281678	0.170037	490.801	76.4014	521.813	662.958	118.639	232.056	0	0	245.854	0	0	0	147.651	0.103459	Inf	-Inf	RYR2	chr1:237766597:+	chr1_237603214_+;chr1_237603291_+
chr1:111690259-111690431:mpeak_4113|chr1_111682248_111726812_CEPT1_NM_+|	231.87	-4.29687	2.07395	-2.07183	0.0382813	0.567806	246.241	519.979	10.0349	452.882	397.876	403.895	7.56371	25.1675	662.301	8.3726	22.4257	25.7024	111.686	-0.692687	3.62074	-4.31342	CEPT1	-	chr1_111147687_+;chr1_111147738_+
chr19:12207297-12207355:mpeak_37841|chr19_12203077_12222060_ZNF788_NR_+|	16.6741	-6.81024	2.66735	-2.55319	0.0106742	0.306963	37.8186	8.9884	5.01743	75.3534	17.3619	38.9208	0	16.6285	0	0	0	0	103.886	-1.34485	Inf	-Inf	ZNF788	-	-
chr6:73696969-73697103:mpeak_67357|chr6_73331570_73904174_KCNQ5_NM_+|	5.01704	-5.63415	2.86342	-1.96763	0.0491104	NA	12.6062	6.29188	0	13.7006	2.17023	1.46871	0	13.932	10.0349	0	0	0	78.8508	0.124171	Inf	-Inf	KCNQ5	chr6:73697024:+;chr6:73697080:+	-
chr11:77445634-77445869:mpeak_14856|chr11_77378536_77531880_RSF1_NM_-|	54.1513	-4.3866	1.99187	-2.20226	0.0276472	0.491953	91.6049	12.1343	0	174.302	54.2558	60.9515	17.6487	29.2123	180.627	13.7006	2.89364	12.484	68.403	-1.48065	2.96778	-4.44843	RSF1	-	-
chr20:3342309-3342383:mpeak_47001|chr20_3233330_3388309_C20orf194_NM_-|	21.0733	-5.60958	2.51756	-2.22818	0.0258683	0.480815	31.0953	16.1791	0	44.9076	70.1708	46.2644	0	41.3466	0	0	1.44682	1.46871	57.1683	-1.771	3.82594	-5.59694	C20orf194	chr20:3342325:-	-
chr22:19226002-19226053:mpeak_50048|chr22_19167482_19279239_CLTCL1_NM_-|	8.43016	-6.42054	2.77091	-2.31712	0.0204972	NA	17.6487	8.53898	5.01743	35.0127	8.68093	5.14049	0	21.1227	0	0	0	0	49.244	-0.646109	Inf	-Inf	CLTCL1	-	-
chr11:84730212-84730291:mpeak_14976|chr11_83170967_85338314_DLG2_NM_-|	175.924	-22.9133	3.10811	-7.37209	1.67977e-13	1.38581e-10	444.578	182.015	50.1743	253.461	342.173	301.82	0	0	536.865	0	0	0	42.0197	-0.407179	Inf	-Inf	DLG2	-	chr11_85019181_-
chr20:44566457-44566609:mpeak_48182|chr20_44563316_44576162_PCIF1_NM_+|	12.2517	-5.27067	2.41453	-2.1829	0.0290433	NA	13.4466	12.1343	0	19.0286	10.1278	14.6871	0	9.43782	65.2266	0.761146	2.17023	0	34.2612	-0.777294	4.67077	-5.44806	PCIF1	chr20:44566512:+;chr20:44566611:+	chr20_45937872_+;chr20_45937970_+
chr4:96181269-96181331:mpeak_58803|chr4_96090550_96470361_UNC5C_NM_-|	40.4865	-8.4564	2.99061	-2.82765	0.00468913	0.212947	103.371	39.9984	25.0872	28.9235	56.426	51.4049	0	0	180.627	0	0	0	31.0872	0.300786	Inf	-Inf	UNC5C	-	-
chr12:20705199-20705438:mpeak_16996|chr12_20522178_20832963_PDE3A_NM_+|	53.0096	-21.4041	3.32148	-6.44413	1.16265e-10	2.30204e-08	53.7864	132.129	0	82.9649	34.0003	27.1711	0	0	306.063	0	0	0	30.3721	0.367216	Inf	-Inf	PDE3A	-	-
chr18:13543533-13543627:mpeak_36016|chr18_13218728_13645125_LDLRAD4_NM_+|	17.7852	-7.44161	3.38303	-2.19969	0.027829	0.491953	30.2548	0	0	13.7006	42.6812	24.9681	0	0	100.349	0	0	1.46871	30.1497	-1.42698	6.09433	-7.5213	LDLRAD4	chr18:13543622:+	chr18_13543622_+
chr4:185339677-185339806:mpeak_60273|chr4_185310220_185395726_IRF2_NM_-|	18.6085	-5.23556	2.33919	-2.23819	0.0252085	0.474457	15.9678	16.1791	0	13.7006	2.17023	8.07791	4.20206	4.4942	155.54	1.52229	1.44682	0	29.3603	0.424731	5.7896	-5.36487	IRF2	chr4:185339685:-	-
chr7:105515535-105515595:mpeak_72451|chr7_105248340_105517031_ATXN7L1_NM_-|	11.9587	-7.66956	2.97995	-2.57372	0.0100612	NA	22.6911	3.59536	0	11.4172	6.5107	8.07791	0	0.89884	90.3137	0	0	0	28.8189	0.0154888	Inf	-Inf	ATXN7L1	chr7:105515541:-	chr7_105875096_-
chr17:37487526-37487584:mpeak_33119|chr17_37417820_37557909_FBXL20_NM_-|	34.8414	-4.47968	2.03435	-2.20201	0.0276643	0.491953	20.1699	0	0	33.4904	58.5963	36.7178	21.8507	51.2339	140.488	19.0286	13.0214	23.4994	28.3321	-2.67491	1.94288	-4.61779	FBXL20	-	-
chr1:24975348-24975529:mpeak_1162|chr1_24969593_24998672_SRRM1_NM_+|	319.283	-4.67397	2.12732	-2.19712	0.0280121	0.491953	110.934	239.99	326.133	191.809	189.534	199.745	14.287	6.7413	2468.58	15.2229	39.7876	28.6399	27.1954	0.220525	4.8954	-4.67488	SRRM1	-	chr1_24648870_+
chr6:25285029-25285123:mpeak_65663|chr6_25279655_25619674_LRRC16A_NM_+|	14.5216	-3.57099	1.77109	-2.01627	0.0437722	0.593995	9.24454	8.08956	0	12.9395	9.40434	11.0153	9.24454	19.3251	80.2789	3.04458	5.06388	6.6092	23.8875	-0.94447	2.8867	-3.83117	LRRC16A	-	-
chr2:120865476-120865590:mpeak_43794|chr2_120770603_120932416_EPB41L5_NM_+|	8.0778	-9.12347	2.67462	-3.41113	0.000646937	NA	4.20206	3.14594	0	22.0732	6.5107	30.1086	1.68082	29.2123	0	0	0	0	23.7852	-2.99775	Inf	-Inf	EPB41L5	-	chr2_120107977_+
chr11:118350899-118350960:mpeak_15736|chr11_118307204_118392611_KMT2A_NM_+|	236.25	-4.72985	2.10965	-2.242	0.0249611	0.473937	53.7864	428.747	5.01743	46.4299	75.9581	57.2797	12.6062	234.148	1891.57	6.85031	10.8512	11.7497	22.8006	1.44022	6.18201	-4.74179	KMT2A	-	chr11_118480234_+
chr16:85113296-85113453:mpeak_30990|chr16_85061356_85121881_KIAA0513_NM_+|	9.11721	-4.84103	2.10818	-2.29631	0.0216583	NA	0	2.2471	0	12.1783	35.4471	22.765	13.4466	7.19072	0	3.04458	8.68093	4.40613	21.7771	-4.96924	0.355362	-5.32461	KIAA0513	chr16:85113360:+;chr16:85113425:+	chr16_85079773_+;chr16_85079832_+
chr3:63884070-63884231:mpeak_53350|chr3_63850232_63985125_ATXN7_NM_+|	38.5328	-4.14485	2.04975	-2.02213	0.0431632	0.593995	29.4144	6.7413	0	50.9968	33.2769	28.6399	5.88289	12.5838	250.872	5.32802	17.3619	21.2963	20.1359	-1.64292	2.6143	-4.25722	ATXN7	-	-
chrX:153297924-153298011:mpeak_82779|chrX_153296901_153363188_MECP2_NM_-|	161.798	-3.61511	1.77433	-2.03745	0.0416049	0.588412	79.8392	71.9072	95.3312	99.7101	112.852	107.216	66.3926	23.3698	1154.01	31.207	57.1495	42.5926	19.8652	-0.372107	3.24764	-3.61975	MECP2	-	-
chr5:142596618-142596676:mpeak_63871|chr5_142150291_142601922_ARHGAP26_NM_+|	11.3587	-6.87498	3.36109	-2.04546	0.0408095	NA	0	11.6849	0	3.04458	0	2.20307	0	8.9884	110.383	0	0	0	19.5773	1.1549	Inf	-Inf	ARHGAP26	chr5:142596670:+	chr5_143217103_+
chr7:72873870-72874116:mpeak_71330|chr7_72856023_72936615_BAZ1B_NM_-|	117.781	-3.7068	1.78943	-2.07149	0.0383126	0.567806	28.574	83.5921	50.1743	35.0127	46.2983	34.5147	18.4891	79.9967	978.399	16.7452	18.8087	22.765	15.075	0.487067	4.20676	-3.71969	BAZ1B	-	chr7_73459540_-;chr7_73459585_-
chr12:66962908-66962962:mpeak_18667|chr12_66743026_67072925_GRIP1_NM_-|	11.5059	-6.12009	2.58547	-2.36711	0.0179277	NA	5.04247	4.4942	5.01743	10.656	1.44682	11.7497	1.68082	0.44942	95.3312	0	0	2.20307	14.9332	-0.712717	5.46725	-6.17996	GRIP1	-	-
chr21:46566120-46566225:mpeak_49802|chr21_46494492_46645461_ADARB1_NR_+mpeak_49802|chr21_46494492_46641932_ADARB1_NM_+||	21.4271	-6.71393	2.15933	-3.10927	0.0018755	0.140663	0	6.7413	0	31.9681	31.8301	34.5147	15.1274	71.4578	50.1743	0	7.23411	8.07791	14.7879	-3.86628	3.1589	-7.02519	ADARB1	chr21:46566210:+	chr21_45146295_+
chr11:95758737-95758787:mpeak_15221|chr11_95713127_96076344_MAML2_NM_-|	3.16367	-7.24569	3.10288	-2.33515	0.0195356	NA	1.68082	2.2471	0	10.656	6.5107	2.93742	0	13.932	0	0	0	0	14.0968	-2.35565	Inf	-Inf	MAML2	-	-
chr5:59755813-59755879:mpeak_61450|chr5_58270907_59783925_PDE4D_NM_-|	40.8652	-9.50923	2.79798	-3.39861	0.000677304	0.0713331	25.2124	22.9204	0	31.9681	22.4257	26.4368	0	9.43782	351.22	0.761146	0	0	13.3458	-0.747882	8.88824	-9.63613	PDE4D	-	-
chr14:47669911-47669967:mpeak_23295|chr14_47528199_47812449_MDGA2_NR_-mpeak_23295|chr14_47311222_48144157_MDGA2_NM_-||	12.8991	-6.39781	2.17778	-2.93777	0.00330586	0.181985	2.52124	7.19072	0	12.1783	7.23411	6.6092	7.56371	3.14594	105.366	1.52229	0.723411	0.734355	12.5504	-1.42188	5.28358	-6.70546	MDGA2	-	-
chr11:77524196-77524384:mpeak_14859|chr11_77378536_77531880_RSF1_NM_-|	27.6448	-3.60394	1.72425	-2.09015	0.0366047	0.56097	10.9254	12.1343	5.01743	11.4172	20.2555	15.4215	17.6487	29.2123	180.627	13.7006	2.89364	12.484	12.3422	-0.746152	2.96778	-3.71393	RSF1	chr11:77524203:-;chr11:77524322:-	chr11_77813160_-;chr11_77813253_-;chr11_77813295_-
chr10:34632800-34632860:mpeak_9578|chr10_34400490_35104253_PARD3_NM_-|	9.31026	-4.30427	2.1355	-2.01557	0.0438445	NA	1.68082	4.04478	5.01743	6.85031	17.3619	7.34355	0	10.3367	50.1743	3.80573	2.17023	2.93742	11.8359	-1.5545	2.76315	-4.31765	PARD3	chr10:34632803:-	chr10_34343862_-
chr5:66226731-66226793:mpeak_61628|chr5_65892175_66458974_MAST4_NM_+|	31.3248	-5.01846	1.84744	-2.71644	0.00659876	0.254524	15.1274	1.34826	0	25.879	36.894	37.4521	12.6062	69.2107	140.488	8.3726	7.95752	20.5619	11.1169	-2.60483	2.59116	-5.19599	MAST4	chr5:66226789:+	chr5_66930961_+
chr9:109625961-109626019:mpeak_78876|chr9_109625377_109773103_ZNF462_NM_+|	72.6316	-5.76674	1.92306	-2.99873	0.00271111	0.165679	12.6062	44.0432	10.0349	90.5763	28.9364	47.7331	19.3295	24.2687	566.97	3.04458	13.0214	11.0153	10.9217	-1.32655	4.49478	-5.82134	ZNF462	-	chr9_106863733_+
chr16:69413017-69413105:mpeak_30426|chr16_69390959_69419891_TERF2_NM_-|	59.4857	-3.67533	1.59479	-2.30459	0.0211896	0.445951	16.8082	16.6285	0	38.8184	27.4896	41.8582	49.5843	210.329	205.715	19.7898	38.3408	48.4674	10.7715	-1.69374	2.127	-3.82074	TERF2	chr16:69413037:-	chr16_69379116_-
chr10:75570440-75570500:mpeak_10465|chr10_75562334_75571589_NDST2_NM_-|	42.4599	-8.04368	2.61523	-3.07571	0.00210002	0.150654	21.0103	21.5722	0	22.8344	23.8726	17.6245	0	64.267	336.168	0	2.17023	0	10.6341	-0.595265	7.52757	-8.12284	NDST2	chr10:75570445:-	chr10_73810691_-
chr12:20704382-20704512:mpeak_16993|chr12_20522178_20832963_PDE3A_NM_+|	39.1282	-21.4059	3.13386	-6.83053	8.46028e-12	2.20413e-09	11.7658	6.29188	75.2615	37.2961	12.298	20.5619	0	0	306.063	0	0	0	10.1634	0.411605	Inf	-Inf	PDE3A	chr12:20704412:+;chr12:20704452:+;chr12:20704478:+;chr12:20704503:+	-
chr12:120428056-120428109:mpeak_20188|chr12_120427647_120530803_CCDC64_NM_+|	13.9754	-6.40198	2.39304	-2.67525	0.00746739	0.268399	0.840412	8.08956	0	10.656	5.78729	3.67178	7.56371	2.69652	125.436	0.761146	0	2.20307	9.8713	-1.17155	5.51659	-6.68814	CCDC64	-	-
chr12:53936667-53936726:mpeak_18051|chr12_53901811_54020199_ATF7_NR_-mpeak_18051|chr12_53911138_54020199_ATF7_NM_-||	31.921	-6.2514	2.13895	-2.92265	0.00347066	0.185316	12.6062	4.94362	0	16.7452	31.1067	17.6245	2.52124	8.9884	275.959	4.56687	5.78729	2.20307	9.15743	-1.89952	4.51681	-6.41633	ATF7	chr12:53936674:-	chr12_53542899_-
chr22:31736659-31736718:mpeak_50575|chr22_31723295_31742249_PATZ1_NM_-|	214.732	-5.10848	2.21646	-2.30479	0.0211781	0.445951	26.0528	116.4	0	21.3121	23.8726	14.6871	10.9254	82.6933	2252.83	8.3726	12.298	7.34355	9.10649	1.25053	6.38818	-5.13764	PATZ1	chr22:31736665:-	chr22_31340681_-;chr22_31340711_-;chr22_31340733_-
chr18:9221844-9222002:mpeak_35836|chr18_9136750_9280938_ANKRD12_NM_+|	20.4047	-7.6184	2.56	-2.97594	0.00292089	0.171042	12.6062	1.34826	5.01743	44.1464	15.1916	21.2963	0	1.79768	140.488	0.761146	0	2.20307	8.8891	-2.08753	5.585	-7.67253	ANKRD12	-	chr18_9221986_+
chr16:47001415-47001539:mpeak_29780|chr16_46991132_47007625_DNAJA2_NM_-|	333.787	-4.21754	1.99446	-2.11463	0.0344615	0.550873	44.5419	242.687	5.01743	76.1146	75.2347	52.1392	76.4775	167.184	3140.91	31.9681	54.9792	38.1865	8.63465	0.522236	4.75743	-4.23519	DNAJA2	-	-
chr3:42672741-42672816:mpeak_52494|chr3_42642146_42687379_NKTR_NM_+|	55.307	-5.23909	2.12183	-2.46913	0.013544	0.356611	7.56371	36.403	5.01743	15.9841	8.68093	8.07791	4.20206	16.1791	551.917	3.80573	1.44682	4.40613	8.5592	0.581133	5.8888	-5.30766	NKTR	-	-
chr16:89383333-89383400:mpeak_31169|chr16_89353521_89556969_ANKRD11_NR_-mpeak_31169|chr16_89335071_89556969_ANKRD11_NM_-||	137.66	-7.44399	2.28911	-3.25192	0.0011463	0.105077	36.9781	39.0995	0	99.7101	34.0003	74.1699	1.68082	46.2903	1299.51	2.28344	10.8512	7.34355	8.46885	-1.45021	6.04004	-7.49025	ANKRD11	-	-
chr20:30960299-30960362:mpeak_47595|chr20_30946146_31022234_ASXL1_NM_+|	62.6752	-5.71871	2.20909	-2.58872	0.0096333	0.288999	7.56371	29.6617	0	12.9395	19.5321	7.34355	0.840412	385.602	275.959	5.32802	0.723411	6.6092	8.42965	-0.0970281	5.70928	-5.80631	ASXL1	chr20:30960356:+	chr20_32372570_+
chr20:60578349-60578404:mpeak_48787|chr20_60551391_60640866_TAF4_NM_-|	18.022	-5.74372	2.48754	-2.30899	0.020944	0.445951	0	5.39304	0	3.80573	2.89364	4.40613	2.52124	10.7861	180.627	0	2.89364	2.93742	8.34255	-1.0421	5.05567	-6.09777	TAF4	chr20:60578350:-	chr20_62003295_-
chr6:12015777-12015912:mpeak_65362|chr6_12012723_12163515_HIVEP1_NM_+|	11.5735	-4.96355	2.37955	-2.08592	0.0369856	NA	5.88289	3.14594	0	3.80573	3.61705	5.87484	0	6.7413	105.366	1.52229	0.723411	2.20307	8.05373	-0.558558	4.65533	-5.21389	HIVEP1	-	-
chr12:53931283-53931342:mpeak_18050|chr12_53901811_54020199_ATF7_NR_-mpeak_18050|chr12_53911138_54020199_ATF7_NM_-||	28.4985	-5.52771	2.32336	-2.37919	0.0173509	0.416912	0	4.94362	10.0349	15.9841	1.44682	9.54662	2.52124	8.9884	275.959	4.56687	5.78729	2.20307	7.81572	-0.848865	4.51681	-5.36568	ATF7	-	-
chr15:56030319-56030553:mpeak_26632|chr15_55912464_56035317_PRTG_NM_-|	8.28833	-6.40535	3.08536	-2.07604	0.0378899	NA	7.56371	4.04478	0	3.80573	3.61705	4.40613	0	0	75.2615	0.761146	0	0	7.71211	-0.0271373	6.62759	-6.65473	PRTG	chr15:56030317:-;chr15:56030417:-;chr15:56030499:-	chr15_55738122_-;chr15_55738206_-
chr3:170075499-170075558:mpeak_55825|chr3_170075472_170110046_SKIL_NM_+|	52.6033	-3.70238	1.88912	-1.95984	0.0500146	0.626766	1.68082	18.8756	0	26.6401	20.9789	21.2963	26.0528	44.942	371.29	28.1624	42.6812	28.6399	6.97169	-1.74523	2.15245	-3.89768	SKIL	-	-
chr3:63898845-63898912:mpeak_53360|chr3_63850232_63985125_ATXN7_NM_+|	29.5035	-4.39602	2.226	-1.97485	0.0482853	0.613018	1.68082	0	10.0349	13.7006	7.95752	7.34355	5.88289	12.5838	250.872	5.32802	17.3619	21.2963	6.52471	-1.3077	2.6143	-3.92199	ATXN7	-	-
chr15:32928329-32928390:mpeak_25682|chr15_32907344_32928457_ARHGAP11A_NM_+|	35.1693	-3.57365	1.73009	-2.06558	0.0388683	0.574322	4.20206	8.08956	0	6.08916	19.5321	18.3589	16.8082	100.221	175.61	24.3567	28.9364	19.8276	6.3004	-1.83918	2.00077	-3.83995	ARHGAP11A	chr15:32928382:+	chr15_32636150_+;chr15_32636180_+
chr17:1724441-1724505:mpeak_31431|chr17_1684733_1733175_SMYD4_NM_-|	18.3575	-5.10841	2.32797	-2.19436	0.0282097	0.491953	4.20206	0	0	15.9841	19.5321	11.0153	6.7233	126.736	0	9.13375	13.7448	13.2184	6.29712	-3.46904	1.88646	-5.35549	SMYD4	chr17:1724451:-	chr17_1821161_-
chr11:84731854-84731904:mpeak_14977|chr11_83170967_85338314_DLG2_NM_-|	63.7306	-23.7484	3.30829	-7.17846	7.05008e-13	3.87754e-10	26.0528	41.3466	0	73.07	45.5749	41.8582	0	0	536.865	0	0	0	6.27713	-1.25179	Inf	-Inf	DLG2	-	-
chr3:63901139-63901202:mpeak_53362|chr3_63850232_63985125_ATXN7_NM_+|	30.5143	-4.34868	2.11873	-2.05249	0.0401218	0.582414	10.0849	0.89884	0	7.61146	17.3619	16.8902	5.88289	12.5838	250.872	5.32802	17.3619	21.2963	6.1171	-1.93032	2.6143	-4.54461	ATXN7	chr3:63901196:+	chr3_63915516_+
chr6:34991347-34991413:mpeak_66499|chr6_34857037_35056382_ANKS1A_NM_+|	65.4561	-5.3326	1.89892	-2.80822	0.00498157	0.220168	19.3295	8.08956	0	28.1624	7.95752	11.0153	23.5315	73.7049	587.039	9.89489	9.40434	7.34355	6.01052	-0.781628	4.68276	-5.46439	ANKS1A	-	-
chr12:20704644-20704706:mpeak_16994|chr12_20522178_20832963_PDE3A_NM_+|	28.862	-19.0859	3.34337	-5.70858	1.1392e-08	1.81904e-06	11.7658	23.3698	0	0.761146	1.44682	2.93742	0	0	306.063	0	0	0	5.73993	2.77158	Inf	-Inf	PDE3A	-	-
chr17:29579730-29579814:mpeak_32758|chr17_29421944_29701030_NF1_NM_+|	6.12928	-4.60062	2.31127	-1.99052	0.0465338	NA	0	0.89884	0	0.761146	6.5107	5.14049	7.56371	4.94362	35.122	6.08916	5.78729	0.734355	5.66147	-3.78757	1.91719	-5.70476	NF1	chr17:29579818:+	chr17_31252796_+
chr1:72739875-72739984:mpeak_3072|chr1_71873253_72748277_NEGR1_NM_-|	45.0591	-8.84172	2.97276	-2.97425	0.00293709	0.171042	22.6911	5.39304	0	2.28344	4.34046	4.40613	0	9.88724	491.708	0	0	0	5.59897	1.34832	Inf	-Inf	NEGR1	-	-
chr17:2295717-2295859:mpeak_31494|chr17_2290943_2304258_MNT_NM_-|	90.4943	-6.20466	2.42209	-2.5617	0.0104162	0.305089	0	18.4262	0	12.9395	2.17023	2.20307	6.7233	78.1991	953.312	6.85031	2.17023	2.93742	5.3243	0.089923	6.44002	-6.35009	MNT	-	chr17_2392502_-
chr15:93482800-93482952:mpeak_27975|chr15_93443550_93567601_CHD2_NM_+|	86.8286	-5.17131	2.15471	-2.4	0.016395	0.407817	8.40412	13.932	25.0872	10.656	6.5107	7.34355	0.840412	31.9088	923.207	5.32802	5.78729	2.93742	4.96082	0.952208	6.08802	-5.13581	CHD2	-	chr15_92939599_+;chr15_92939623_+
chr7:102960045-102960114:mpeak_72361|chr7_102953090_102985320_DNAJC2_NM_-|	57.8963	-4.77564	2.17034	-2.20041	0.0277777	0.491953	4.20206	12.5838	0	12.9395	18.8087	28.6399	1.68082	29.6617	521.813	6.85031	28.9364	28.6399	4.55184	-1.84702	3.10196	-4.94898	DNAJC2	-	chr7_103319649_-
chr2:46072844-46072917:mpeak_41576|chr2_45879042_46411873_PRKCE_NM_+|	27.7951	-7.15647	2.24005	-3.19479	0.00139934	0.117402	5.88289	2.69652	0	11.4172	18.0853	4.40613	5.88289	17.5274	260.906	4.56687	2.17023	0	4.52633	-1.9827	5.39923	-7.38193	PRKCE	chr2:46072897:+	chr2_45845757_+
chr12:65633696-65633768:mpeak_18618|chr12_65563350_65639941_LEMD3_NM_+|	39.4017	-4.23785	2.1484	-1.97256	0.0485461	0.613018	8.40412	4.4942	0	2.28344	1.44682	6.6092	3.36165	33.7065	396.377	2.28344	6.5107	7.34355	4.46365	0.319023	4.74734	-4.42832	LEMD3	-	-
chr11:67933181-67933279:mpeak_14404|chr11_67926638_67981239_SUV420H1_NM_-|	206.132	-6.12365	2.06449	-2.96618	0.00301528	0.172074	33.6165	24.2687	0	90.5763	87.5327	87.3883	10.0849	131.231	1881.54	25.879	39.7876	61.6858	4.29234	-2.19743	3.98949	-6.18692	SUV420H1	chr11:67933184:-;chr11:67933227:-	chr11_68165718_-;chr11_68165754_-
chr15:28524954-28525018:mpeak_25593|chr15_28357181_28567298_HERC2_NM_-|	49.6752	-3.67913	1.75648	-2.09461	0.0362056	0.560797	5.88289	8.9884	0	2.28344	11.5746	4.40613	38.659	290.775	190.662	15.9841	18.8087	8.07791	4.289	-0.296485	3.60072	-3.8972	HERC2	chr15:28524966:-	chr15_28279820_-
chrX:153353245-153353305:mpeak_82781|chrX_153296901_153363188_MECP2_NM_-|	128.089	-5.02652	1.9784	-2.5407	0.011063	0.312924	24.372	10.3367	0	24.3567	65.8304	37.4521	66.3926	23.3698	1154.01	31.207	57.1495	42.5926	4.18589	-1.87871	3.24764	-5.12635	MECP2	chrX:153353249:-	chrX_154087794_-;chrX_154087839_-
chrX:70587121-70587211:mpeak_81492|chrX_70586088_70749562_TAF1_NR_+mpeak_81492|chrX_70586088_70683673_TAF1_NM_+||	30.2535	-4.23502	1.80392	-2.34768	0.0188908	0.423119	2.52124	4.4942	0	10.656	15.1916	12.484	10.0849	186.959	60.2092	14.4618	18.8087	27.1711	4.09059	-2.44993	2.08957	-4.53951	TAF1	chrX:70587179:+	chrX_71367328_+
chr1:240334394-240334480:mpeak_8417|chr1_240255184_240637427_FMN2_NM_+|	39.6528	-9.87658	2.88418	-3.4244	0.000616162	0.0677778	6.7233	11.2355	0	5.32802	4.34046	7.34355	0	14.3814	426.482	0	0	0	4.07355	0.0781348	Inf	-Inf	FMN2	-	-
chrX:20189078-20189131:mpeak_80597|chrX_20173638_20284750_RPS6KA3_NM_-|	56.8779	-4.08601	1.91072	-2.13847	0.0324788	0.537692	14.287	1.34826	0	10.656	10.1278	8.07791	30.2548	54.8292	496.726	20.5509	20.2555	15.4215	4.03103	-0.884352	3.37119	-4.25554	RPS6KA3	-	-
chr3:32587334-32587474:mpeak_52191|chr3_32568400_32612366_DYNC1LI1_NM_-|	192.768	-5.0381	2.10709	-2.39103	0.0168013	0.409686	25.2124	31.01	0	14.4618	17.3619	16.8902	19.3295	62.4694	2072.2	7.61146	21.7023	24.9681	3.91521	0.206813	5.3104	-5.10359	DYNC1LI1	-	-
chr4:13627155-13627317:mpeak_57348|chr4_13571752_13629328_BOD1L1_NM_-|	40.4722	-6.67702	2.3475	-2.84432	0.00445067	0.209817	10.0849	4.94362	0	6.08916	27.4896	8.81226	0	26.5158	391.36	3.80573	2.89364	3.67178	3.59642	-1.49605	5.33243	-6.82848	BOD1L1	chr4:13627160:-;chr4:13627265:-	chr4_13625536_-
chr3:142769778-142769894:mpeak_55209|chr3_142720371_142775153_U2SURP_NM_+|	144.155	-4.52266	2.26388	-1.99774	0.0457447	0.600627	0	18.8756	0	9.89489	6.5107	11.7497	16.8082	88.0863	1485.16	22.8344	36.894	33.046	3.56132	-0.57688	4.09921	-4.67609	U2SURP	-	chr3_143050977_+;chr3_143051018_+;chr3_143051044_+
chr3:185812834-185812967:mpeak_56317|chr3_185766649_185826901_ETV5_NM_-|	151.989	-4.21575	2.09352	-2.01371	0.0440396	0.593995	9.24454	31.01	0	9.13375	10.1278	2.20307	6.7233	389.647	1319.58	8.3726	23.8726	13.9527	3.51884	0.907193	5.21504	-4.30785	ETV5	chr3:185812832:-;chr3:185812870:-;chr3:185812909:-	chr3_186095083_-;chr3_186095121_-
chr18:265451-265506:mpeak_35646|chr18_214921_268059_THOC1_NM_-|	50.5203	-8.08077	2.49333	-3.24096	0.0011913	0.107217	0	6.7413	0	8.3726	5.78729	2.93742	1.68082	19.3251	556.935	2.28344	1.44682	0.734355	3.4993	-1.34267	7.01624	-8.35891	THOC1	-	-
chr1:63152870-63153030:mpeak_2859|chr1_62921127_63154039_DOCK7_NM_-|	58.1735	-7.23387	2.21398	-3.26737	0.00108554	0.103335	13.4466	0.89884	0	7.61146	20.2555	11.0153	24.372	8.08956	602.092	3.04458	5.78729	1.46871	3.39107	-1.43852	5.94494	-7.38346	DOCK7	chr1:63152868:-;chr1:63152950:-	chr1_62687139_-;chr1_62687199_-;chr1_62687281_-;chr1_62687351_-
chr22:29447381-29447443:mpeak_50441|chr22_29279754_29449566_ZNRF3_NM_+mpeak_50441|chr22_29279754_29449566_ZNRF3_NM_+||	51.1085	-4.57866	1.9878	-2.30338	0.0212574	0.445951	2.52124	9.43782	0	6.08916	10.1278	10.281	19.3295	52.1327	461.604	3.04458	12.298	26.4368	3.36517	-1.14777	3.67345	-4.82123	ZNRF3	-	-
chr16:87986300-87986360:mpeak_31071|chr16_87985037_88110195_BANP_NM_+|	121.088	-4.42745	1.92838	-2.29594	0.0216791	0.447132	20.1699	7.64014	0	8.3726	9.40434	11.0153	15.9678	192.352	1128.92	22.0732	20.9789	16.1558	3.11949	-0.0500761	4.49733	-4.5474	BANP	chr16:87986354:+	chr16_87952762_+
chr1:16247356-16247486:mpeak_701|chr1_16174358_16265790_SPEN_NM_+|	73.0517	-4.93568	2.37999	-2.07383	0.0380953	0.567806	9.24454	8.08956	0	2.28344	6.5107	1.46871	0.840412	20.6733	812.824	1.52229	3.61705	9.54662	3.11638	0.756182	5.82812	-5.07194	SPEN	-	chr1_15920958_+
chr3:63890714-63890852:mpeak_53355|chr3_63850232_63985125_ATXN7_NM_+|	28.3889	-4.35118	2.06062	-2.11159	0.0347217	0.550873	2.52124	2.69652	0	6.08916	7.95752	8.07791	5.88289	12.5838	250.872	5.32802	17.3619	21.2963	2.90588	-2.08415	2.6143	-4.69845	ATXN7	chr3:63890770:+	chr3_63905089_+
chr21:45503271-45503372:mpeak_49723|chr21_45432205_45523173_TRAPPC10_NM_+|	81.7894	-4.13633	2.05356	-2.01423	0.0439857	0.593995	0	7.64014	0	11.4172	7.23411	6.6092	31.9357	94.3782	697.423	33.4904	29.6598	61.6858	2.78249	-1.72521	2.72215	-4.44736	TRAPPC10	chr21:45503295:+;chr21:45503353:+;chr21:45503396:+	chr21_44083471_+;chr21_44083518_+
chr17:17588313-17588366:mpeak_32236|chr17_17584786_17713283_RAI1_NM_+|	69.4152	-6.24207	1.9478	-3.20468	0.00135214	0.115398	3.36165	10.3367	0	14.4618	10.1278	15.4215	10.0849	132.129	612.126	4.56687	13.0214	7.34355	2.7239	-1.5464	4.91916	-6.46555	RAI1	chr17:17588364:+	chr17_17685049_+
chr3:132136551-132136613:mpeak_54815|chr3_132136552_132257019_DNAJC13_NM_+|	58.0497	-4.01476	1.92381	-2.08688	0.0368988	0.563496	5.04247	4.04478	5.01743	19.0286	10.8512	18.3589	21.8507	9.88724	491.708	19.7898	51.3622	39.6552	2.69458	-1.77402	2.23999	-4.01401	DNAJC13	-	-
chr12:80203580-80203800:mpeak_19022|chr12_80169795_80329235_PPP1R12A_NM_-|	73.4464	-4.18765	2.00225	-2.09147	0.036486	0.560887	3.36165	11.2355	5.01743	13.7006	7.95752	13.2184	6.7233	26.9652	722.51	15.9841	26.0428	28.6399	2.59384	-0.83033	3.41966	-4.24999	PPP1R12A	-	chr12_79809885_-;chr12_79810005_-
chr17:2294853-2294950:mpeak_31492|chr17_2290943_2304258_MNT_NM_-|	89.3923	-4.83742	2.3907	-2.02344	0.0430281	0.593995	2.52124	13.932	0	5.32802	0	0.734355	6.7233	78.1991	953.312	6.85031	2.17023	2.93742	2.3771	1.44042	6.44002	-4.9996	MNT	-	-
chr4:728158-728270:mpeak_56819|chr4_699572_759819_PCGF3_NM_+|	169.162	-4.39567	2.00148	-2.1962	0.0280774	0.491953	5.88289	19.3251	0	15.9841	33.2769	24.9681	78.1583	29.2123	1605.58	44.9076	91.8732	80.7791	2.20742	-1.55811	2.977	-4.5351	PCGF3	chr4:728212:+;chr4:728263:+	chr4_734473_+
chr2:71622750-71622890:mpeak_42380|chr2_71558884_71661871_ZNF638_NM_+|	135.127	-5.12833	2.5406	-2.01855	0.0435345	0.593995	0	11.2355	0	3.80573	4.34046	1.46871	1.68082	35.0548	1530.32	3.80573	19.5321	10.281	2.15095	0.22472	5.54264	-5.31792	ZNF638	chr2:71622818:+;chr2:71622884:+	chr2_71395687_+;chr2_71395750_+
chr15:75713429-75713497:mpeak_27385|chr15_75664550_75748124_SIN3A_NM_-|	28.7688	-5.28074	1.95257	-2.70451	0.00684053	0.254591	1.68082	2.69652	0	3.04458	7.95752	2.93742	10.0849	66.9636	230.802	3.04458	9.40434	6.6092	2.13286	-1.67105	4.01375	-5.6848	SIN3A	chr15:75713435:-	chr15_75421097_-
chr14:55765487-55765544:mpeak_23657|chr14_55738020_55817098_FBXO34_NM_+|	42.3962	-5.81695	2.14739	-2.70885	0.00675178	0.254524	2.52124	4.04478	0	8.3726	0.723411	7.34355	4.20206	48.0879	416.447	5.32802	4.34046	7.34355	2.10118	-1.32408	4.78415	-6.10823	FBXO34	-	-
chr8:143329059-143329121:mpeak_76787|chr8_143293674_143484610_TSNARE1_NM_-|	4.25769	-8.45664	3.10285	-2.72544	0.00642154	NA	0.840412	0.44942	0	12.1783	1.44682	4.40613	0	31.01	0	0.761146	0	0	2.07971	-3.80525	5.34842	-9.15366	TSNARE1	-	-
chr1:45101957-45102180:mpeak_2296|chr1_44870959_45116375_RNF220_NM_+|	472.466	-6.31934	2.00702	-3.14862	0.00164044	0.126878	47.0631	10.7861	50.1743	48.7133	49.9153	66.092	10.0849	377.513	4907.05	24.3567	48.4685	29.3742	2.04024	-0.608677	5.69508	-6.30375	RNF220	chr1:45102038:+;chr1:45102164:+	chr1_44636363_+;chr1_44636442_+;chr1_44636491_+;chr1_44636532_+
chr16:14294436-14294581:mpeak_28881|chr16_14165169_14354765_MKL2_NM_+|	57.8982	-7.0828	2.19341	-3.22913	0.00124167	0.109755	4.20206	4.04478	5.01743	10.656	2.89364	6.6092	0.840412	35.9536	617.144	3.04458	2.17023	2.20307	2.02837	-0.60387	6.462	-7.06587	MKL2	chr16:14294558:+;chr16:14294586:+	-
chr9:135785131-135785274:mpeak_79983|chr9_135772141_135820020_TSC1_NM_-|	119.673	-5.41087	1.98075	-2.73173	0.00630027	0.246462	8.40412	8.53898	0	12.9395	18.0853	22.765	9.24454	117.299	1154.01	24.3567	34.0003	26.4368	1.98466	-1.66663	3.91666	-5.5833	TSC1	chr9:135785135:-;chr9:135785194:-	chr9_132909744_-
chr3:185331128-185331191:mpeak_56280|chr3_185304030_185347569_SENP2_NM_+|	25.9228	-4.74619	1.98164	-2.39508	0.0166167	0.409686	0	1.34826	0	6.08916	12.298	4.40613	10.0849	106.513	95.3312	13.7006	25.3194	35.9834	1.90856	-4.07944	1.49855	-5.57799	SENP2	-	chr3_185613350_+
chr16:2810420-2810588:mpeak_28416|chr16_2802329_2820858_SRRM2_NM_+|	435.238	-3.67209	1.77229	-2.07195	0.0382705	0.567806	23.5315	60.2223	5.01743	47.191	13.7448	34.5147	211.784	528.967	3918.61	92.8598	144.682	141.731	1.90522	-0.104661	3.61883	-3.72349	SRRM2	chr16:2810622:+	chr16_2760620_+
chr5:59756366-59756516:mpeak_61451|chr5_58270907_59783925_PDE4D_NM_-|	31.9221	-9.03264	2.89275	-3.12251	0.00179318	0.136557	1.68082	3.59536	5.01743	9.89489	0.723411	0.734355	0	9.43782	351.22	0.761146	0	0	1.90275	-0.141281	8.88824	-9.02952	PDE4D	-	-
chr17:40874819-40874943:mpeak_33387|chr17_40854610_40897071_EZH1_NM_-|	59.0584	-8.92723	3.23706	-2.75782	0.0058188	0.244094	0	8.08956	5.01743	3.04458	0	0.734355	0	39.549	652.266	0	0	0	1.89458	1.79428	Inf	-Inf	EZH1	-	-
chr20:13564991-13565041:mpeak_47252|chr20_13371099_13619583_TASP1_NM_-|	9.46474	-4.5676	2.2823	-2.00132	0.045358	NA	0	0.44942	0	3.80573	5.06388	3.67178	3.36165	3.14594	65.2266	9.13375	7.23411	12.484	1.87952	-4.80249	1.31399	-6.11648	TASP1	chr20:13564990:-	chr20_13584344_-
chr16:87986050-87986166:mpeak_31070|chr16_87985037_88110195_BANP_NM_+|	120.38	-5.24845	1.99368	-2.63254	0.00847493	0.274237	11.7658	4.94362	0	2.28344	16.6384	12.484	15.9678	192.352	1128.92	22.0732	20.9789	16.1558	1.87431	-0.910378	4.49733	-5.4077	BANP	-	-
chr2:212639846-212639928:mpeak_45967|chr2_212248785_213403352_ERBB4_NM_-|	57.4906	-7.57846	2.77457	-2.7314	0.00630659	0.246462	17.6487	3.14594	0	30.4458	34.0003	30.1086	0	0	561.952	3.80573	2.17023	6.6092	1.85021	-2.18494	5.48065	-7.66559	ERBB4	-	-
chr6:34950938-34951002:mpeak_66495|chr6_34857037_35056382_ANKS1A_NM_+|	61.3034	-5.33498	1.9411	-2.74844	0.00598801	0.246462	1.68082	6.7413	0	5.32802	2.89364	8.07791	23.5315	73.7049	587.039	9.89489	9.40434	7.34355	1.84621	-0.952578	4.68276	-5.63534	ANKS1A	-	-
chr3:50106128-50106211:mpeak_52875|chr3_49977476_50114440_RBM6_NM_+|	188.998	-4.75669	2.20021	-2.16193	0.0306238	0.516836	6.7233	19.7745	0	1.52229	7.95752	11.0153	13.4466	78.1991	2072.2	6.85031	25.3194	24.9681	1.83685	0.370589	5.24301	-4.87242	RBM6	chr3:50106206:+	chr3_50068754_+
chr17:75095260-75095315:mpeak_35235|chr17_75084724_75209999_SEC14L1_NM_+|	64.9513	-3.89548	1.76044	-2.21279	0.0269118	0.488596	4.20206	4.04478	0	3.80573	7.95752	3.67178	46.2227	152.353	486.691	12.1783	30.3833	27.9055	1.80517	-0.904294	3.28164	-4.18594	SEC14L1	chr17:75095311:+	chr17_77099229_+
chr17:78295210-78295280:mpeak_35391|chr17_78234659_78367144_RNF213_NM_+|	42.6894	-3.74812	1.85992	-2.01521	0.0438829	0.593995	2.52124	1.34826	0	3.80573	12.298	11.0153	90.7645	240.44	10.0349	39.5796	57.8729	42.5926	1.70093	-2.80909	1.28489	-4.09398	RNF213	chr17:78295263:+	chr17_80321460_+
chr17:17657932-17658003:mpeak_32241|chr17_17584786_17713283_RAI1_NM_+|	66.7355	-5.30276	2.20153	-2.40867	0.0160108	0.402301	1.68082	6.7413	0	0	5.78729	7.34355	10.0849	132.129	612.126	4.56687	13.0214	7.34355	1.67473	-0.640703	4.91916	-5.55986	RAI1	chr17:17657990:+	chr17_17754689_+
chrX:64955211-64955307:mpeak_81349|chrX_64887510_64959590_MSN_NM_+|	167.654	-7.84737	2.78372	-2.81902	0.00481704	0.216767	1.68082	20.2239	0	0	1.44682	0.734355	6.7233	991.87	988.434	0	0	0.734355	1.65358	3.32806	11.4018	-8.07378	MSN	-	-
chr7:73917284-73917334:mpeak_71401|chr7_73868119_74016691_GTF2IRD1_NM_+|	32.5635	-5.17566	1.99549	-2.59367	0.00949566	0.286607	1.68082	0	0	3.04458	4.34046	6.6092	19.3295	71.9072	230.802	15.2229	23.8726	13.9527	1.5658	-3.05759	2.60186	-5.65945	GTF2IRD1	-	-
chr1:82267596-82267660:mpeak_3201|chr1_82165454_82456074_ADGRL2_NM_+|	139.777	-6.80575	2.98839	-2.2774	0.0227626	0.455362	0	8.53898	0	0	0	4.40613	4.20206	62.9188	1590.53	4.56687	2.17023	0	1.54538	0.954551	7.94279	-6.98824	ADGRL2	-	chr1_81801964_+
chr6:88408120-88408260:mpeak_67789|chr6_88385325_88411985_AKIRIN2_NM_-|	233.207	-5.632	2.52767	-2.22814	0.0258711	0.480815	0	13.932	0	0	6.5107	8.07791	10.9254	208.98	2498.68	9.13375	23.1491	19.0932	1.53742	-0.0664378	5.72561	-5.79205	AKIRIN2	chr6:88408121:-	chr6_87698404_-;chr6_87698457_-
chr11:72578904-72578952:mpeak_14623|chr11_72549919_72853143_FCHSD2_NM_-|	30.331	-6.13636	2.64342	-2.32137	0.0202667	0.44194	1.68082	0	0	6.85031	0	4.40613	0.840412	7.64014	321.116	6.85031	6.5107	8.07791	1.52989	-2.74351	3.9424	-6.68591	FCHSD2	-	-
chr17:47872765-47872826:mpeak_33942|chr17_47865980_47904762_KAT7_NM_+|	38.3389	-5.64376	1.92242	-2.93576	0.00332736	0.181985	3.36165	0.89884	0	6.85031	4.34046	1.46871	15.1274	172.128	235.819	9.13375	5.06388	5.87484	1.51055	-1.57113	4.39762	-5.96875	KAT7	-	chr17_49795432_+
chr16:22087324-22087485:mpeak_29157|chr16_22019455_22092016_C16orf52_NM_+|	56.8433	-5.03373	2.18998	-2.29853	0.0215318	0.445951	0	0.89884	5.01743	0.761146	9.40434	2.20307	19.3295	53.481	521.813	19.7898	34.0003	15.4215	1.49244	-1.06392	3.10289	-4.16681	C16orf52	chr16:22087380:+	chr16_22076089_+
chr17:60585782-60585873:mpeak_34599|chr17_60556385_60689752_TLK2_NM_+|	60.6317	-4.05801	2.0559	-1.97384	0.0484005	0.613018	4.20206	1.79768	0	6.85031	5.78729	2.93742	7.56371	50.7844	566.97	12.9395	36.1705	31.5773	1.43921	-1.37626	2.95418	-4.33044	TLK2	-	chr17_62508473_+;chr17_62508499_+
chr5:176564354-176564406:mpeak_64697|chr5_176560079_176720832_NSD1_NM_+|	131.127	-5.13351	2.28819	-2.24348	0.0248659	0.473937	6.7233	0	0	2.28344	15.1916	2.20307	35.2973	76.8508	1329.62	44.9076	33.2769	27.1711	1.39897	-1.54935	3.7745	-5.32385	NSD1	chr5:176564405:+;chr5:176564453:+	chr5_177137403_+;chr5_177137451_+
chr2:37126656-37126776:mpeak_41300|chr2_37076768_37193615_STRN_NM_-|	116.326	-4.42928	1.88433	-2.35059	0.0187438	0.423119	7.56371	4.04478	5.01743	10.656	14.4682	16.1558	22.6911	64.7165	1113.87	25.879	51.3622	59.4828	1.38402	-1.31201	3.13523	-4.44724	STRN	-	-
chr2:153246535-153246600:mpeak_44487|chr2_153191750_153504309_FMNL2_NM_+|	168.013	-5.08755	2.29543	-2.21638	0.0266656	0.488596	5.04247	13.0332	0	2.28344	2.17023	4.40613	5.04247	62.0199	1896.59	1.52229	12.298	11.7497	1.38077	1.0287	6.26294	-5.23424	FMNL2	-	-
chr15:59039447-59039709:mpeak_26712|chr15_58889840_59042177_ADAM10_NM_-|	109.319	-4.38791	2.19022	-2.00341	0.0451336	0.598026	0	5.39304	0	3.80573	3.61705	7.34355	26.0528	57.0763	1088.78	22.0732	47.7451	49.9362	1.38057	-1.45314	3.29071	-4.74385	ADAM10	chr15:59039444:-;chr15:59039553:-	chr15_58747355_-
chr6:147526681-147526764:mpeak_68959|chr6_147525493_147705849_STXBP5_NM_+|	42.2895	-4.57493	2.22458	-2.05653	0.0397311	0.580144	3.36165	0.44942	0	0	7.23411	6.6092	18.4891	26.9652	391.36	13.7006	23.1491	16.1558	1.3087	-1.86092	3.0428	-4.90372	STXBP5	chr6:147526753:+;chr6:147526783:+	chr6_147205632_+
chrX:64957032-64957179:mpeak_81351|chrX_64887510_64959590_MSN_NM_+|	166.358	-6.70215	3.20053	-2.09407	0.0362535	0.560797	0	8.53898	0	0	0	0	6.7233	991.87	988.434	0	0	0.734355	1.28921	Inf	11.4018	Inf	MSN	-	chrX_65737267_+;chrX_65737317_+
chr17:49098513-49098681:mpeak_34055|chr17_49043748_49198226_SPAG9_NM_-|	156.891	-4.32802	2.04226	-2.11923	0.0340709	0.550873	0	7.19072	0	6.85031	3.61705	8.81226	69.7542	207.183	1399.86	41.1019	79.5752	58.7484	1.28651	-1.42287	3.22425	-4.64712	SPAG9	-	-
chr16:56974154-56974211:mpeak_30013|chr16_56966001_56977037_HERPUD1_NM_+|	118.885	-4.90757	2.06054	-2.38169	0.0172332	0.416119	0	6.29188	5.01743	1.52229	7.23411	1.46871	46.2227	302.909	1013.52	6.85031	26.7662	8.81226	1.24492	0.145394	5.00523	-4.85984	HERPUD1	chr16:56974209:+	chr16_56940295_+
chr4:73979502-73979566:mpeak_58255|chr4_73942007_74124502_ANKRD17_NM_-|	146.556	-4.73495	2.2741	-2.08212	0.0373318	0.563496	0	8.08956	5.01743	1.52229	2.89364	4.40613	8.40412	54.8292	1630.66	14.4618	17.3619	11.0153	1.16066	0.571148	5.30528	-4.73413	ANKRD17	-	chr4_73113797_-
chr3:142747319-142747495:mpeak_55205|chr3_142720371_142775153_U2SURP_NM_+|	143.231	-4.83069	2.03931	-2.36878	0.0178468	0.418682	4.20206	8.08956	0	6.08916	4.34046	13.2184	16.8082	88.0863	1485.16	22.8344	36.894	33.046	1.15955	-0.944045	4.09921	-5.04325	U2SURP	-	chr3_143028610_+;chr3_143028638_+
chr1:120537032-120537104:mpeak_4647|chr1_120459317_120612317_NOTCH2_NM_-|	56.6139	-4.35651	1.88655	-2.30925	0.0209296	0.445951	1.68082	0	0	9.89489	2.17023	9.54662	157.998	215.722	75.2615	36.535	84.6391	85.9196	1.12309	-3.68457	1.11637	-4.80094	NOTCH2	-	-
chr5:131051277-131051358:mpeak_63141|chr5_130980456_131132756_FNIP1_NM_-|	51.4579	-7.31803	2.47609	-2.95548	0.00312186	0.175604	2.52124	1.79768	0	0	11.5746	1.46871	0.840412	83.5921	506.76	4.56687	2.17023	2.20307	1.09581	-1.59457	6.04718	-7.64175	FNIP1	chr5:131051282:-	chr5_131715588_-
chr2:32622095-32622155:mpeak_41217|chr2_32582095_32842791_BIRC6_NM_+|	140.73	-7.15572	2.1108	-3.39005	0.000698787	0.0720624	10.9254	0.89884	0	6.85031	14.4682	9.54662	17.6487	116.849	1485.16	5.32802	13.7448	7.34355	1.09507	-1.38424	5.93811	-7.32235	BIRC6	chr2:32622146:+	chr2_32397078_+
chr13:113200787-113200850:mpeak_22367|chr13_113140465_113242499_TUBGCP3_NM_-|	99.9343	-4.38743	1.96672	-2.23083	0.0256924	0.480815	1.68082	4.4942	0	5.32802	20.2555	19.0932	28.574	68.7612	802.789	49.4745	113.575	85.1852	1.02903	-2.85501	1.85842	-4.71342	TUBGCP3	chr13:113200796:-	chr13_112546486_-
chr1:11072743-11072806:mpeak_521|chr1_11072678_11082180_TARDBP_NM_+|	1320.65	-5.01813	1.93005	-2.6	0.00932227	0.285772	81.52	61.5705	5.01743	151.468	36.1705	73.4355	297.506	761.317	13597.2	201.704	289.364	291.539	1.01056	-0.81781	4.22707	-5.04488	TARDBP	-	-
chr3:141131966-141132029:mpeak_55097|chr3_141043054_141161230_ZBTB38_NM_+|	75.8969	-4.86077	2.05125	-2.36966	0.0178046	0.418682	2.52124	0	0	6.08916	6.5107	3.67178	36.1377	73.7049	652.266	54.8025	38.3408	36.7178	0.992472	-2.69016	2.55303	-5.24318	ZBTB38	chr3:141132022:+	chr3_141413179_+
chr17:42489304-42489359:mpeak_33558|chr17_42478821_42580970_GPATCH8_NM_-|	104.752	-4.37097	1.84458	-2.36963	0.0178061	0.418682	4.20206	3.14594	0	11.4172	3.61705	3.67178	46.2227	168.532	903.137	36.535	37.6174	38.9208	0.985962	-1.34808	3.30545	-4.65353	GPATCH8	-	-
chr2:153246254-153246389:mpeak_44486|chr2_153191750_153504309_FMNL2_NM_+|	169.738	-6.88641	2.1747	-3.16661	0.00154229	0.126034	6.7233	6.7413	5.01743	16.7452	5.06388	7.34355	5.04247	62.0199	1896.59	1.52229	12.298	11.7497	0.941207	-0.657503	6.26294	-6.92045	FMNL2	chr2:153246281:+	-
chr17:948229-948286:mpeak_31343|chr17_909409_982386_ABR_NM_-|	27.4605	-6.1907	2.18037	-2.83929	0.00452144	0.210737	0.840412	0	0	7.61146	7.95752	0.734355	21.8507	23.3698	225.784	12.1783	11.5746	17.6245	0.930329	-4.27793	2.7114	-6.98933	ABR	chr17:948233:-	chr17_1044994_-
chr2:183832001-183832095:mpeak_45213|chr2_183790546_183903586_NCKAP1_NM_-|	93.6039	-4.67092	2.06244	-2.26476	0.0235277	0.459622	2.52124	0	0	15.2229	2.89364	10.281	71.435	57.0763	687.388	60.1305	119.363	96.9349	0.92704	-3.49356	1.56149	-5.05505	NCKAP1	-	-
chr17:27837919-27838019:mpeak_32658|chr17_27717942_27869578_TAOK1_NM_+|	76.1177	-4.15624	1.95961	-2.12095	0.033926	0.550873	0	2.2471	0	6.08916	2.89364	3.67178	34.4569	166.285	546.9	52.519	52.0856	46.2644	0.901674	-2.49352	2.30905	-4.80258	TAOK1	-	-
chr17:80478541-80478603:mpeak_35577|chr17_80477593_80559178_FOXK2_NM_+|	108.732	-4.13928	1.93885	-2.13492	0.0327673	0.540661	4.20206	2.69652	0	6.08916	9.40434	0.734355	47.0631	193.7	913.172	23.5955	58.5963	45.53	0.896746	-1.2341	3.17549	-4.40959	FOXK2	chr17:80478597:+	chr17_82520720_+
chr2:86671013-86671065:mpeak_42809|chr2_86668270_86719161_KDM3A_NM_+|	112.482	-6.03257	2.32121	-2.59889	0.00935253	0.285772	4.20206	3.59536	0	1.52229	7.23411	2.93742	2.52124	37.7513	1264.39	2.28344	10.1278	13.2184	0.896485	-0.584677	5.66973	-6.2544	KDM3A	chr2:86671065:+	chr2_86443941_+
chr1:180386141-180386198:mpeak_6560|chr1_180257652_180472022_ACBD6_NM_-|	36.2255	-4.1203	2.07636	-1.98438	0.0472132	0.610196	0	0.89884	0	2.28344	9.40434	0.734355	29.4144	57.9752	215.749	36.535	35.4471	46.2644	0.889532	-3.78871	1.35818	-5.14689	ACBD6	chr1:180386147:-	chr1_180417013_-
chr16:400433-400572:mpeak_28168|chr16_338248_402676_AXIN1_NM_-|	113.129	-6.31645	2.09835	-3.01019	0.00261082	0.165679	5.88289	1.79768	0	3.04458	5.78729	10.281	11.7658	70.1095	1214.22	9.89489	13.0214	11.7497	0.88889	-1.31526	5.22451	-6.53976	AXIN1	chr16:400432:-;chr16:400512:-	chr16_350513_-
chr12:111957635-111957864:mpeak_19882|chr12_111890644_112037480_ATXN2_NM_-|	330.286	-4.76538	2.11495	-2.25318	0.0242475	0.469418	6.7233	15.7297	0	6.08916	1.44682	9.54662	28.574	320.886	3477.08	10.656	45.5749	41.1239	0.880155	0.39438	5.29664	-4.90226	ATXN2	-	-
chr15:75714694-75714753:mpeak_27387|chr15_75664550_75748124_SIN3A_NM_-|	28.5905	-7.08586	2.32758	-3.0443	0.00233223	0.160341	0	0.89884	0	0	9.40434	5.87484	10.0849	66.9636	230.802	3.04458	9.40434	6.6092	0.875919	-4.08736	4.01375	-8.10111	SIN3A	chr15:75714701:-	chr15_75422361_-
chr5:14796983-14797033:mpeak_60735|chr5_14711419_14871887_ANKH_NM_-|	17.3636	-5.20359	2.2926	-2.26973	0.0232239	0.458002	0	0.44942	0	4.56687	0	7.34355	8.40412	41.7961	105.366	9.13375	18.0853	13.2184	0.866679	-4.72802	1.94377	-6.67178	ANKH	-	-
chr5:65470774-65470874:mpeak_61614|chr5_65440045_65474546_SREK1_NM_+|	127.14	-5.31571	2.24744	-2.36522	0.0180192	0.419847	0	3.59536	0	12.9395	6.5107	14.6871	11.7658	42.2455	1214.22	57.0859	74.5113	88.1226	0.850483	-3.24714	2.52908	-5.77622	SREK1	-	chr5_66174985_+;chr5_66175041_+
chr9:125627576-125627683:mpeak_79360|chr9_125612101_125667562_RC3H2_NM_-|	36.3862	-5.33153	2.02514	-2.63267	0.00847171	0.274237	0	0.89884	0	9.13375	5.06388	5.14049	31.0953	28.3135	270.941	31.9681	17.3619	36.7178	0.816262	-4.42724	1.94079	-6.36802	RC3H2	chr9:125627597:-	chr9_122865303_-
chr2:61528527-61528594:mpeak_41949|chr2_61415844_61697849_USP34_NM_-|	264.597	-4.91049	2.07851	-2.36251	0.0181517	0.419864	1.68082	13.932	0	8.3726	9.40434	11.7497	31.9357	139.77	2794.71	45.6687	67.2772	50.6705	0.789481	-0.919283	4.18033	-5.09961	USP34	-	-
chr18:18595385-18595435:mpeak_36064|chr18_18531348_18691812_ROCK1_NM_-|	116	-4.38073	2.20496	-1.98677	0.0469483	0.609959	4.20206	0.44942	5.01743	3.04458	2.89364	5.87484	5.88289	35.0548	1244.32	16.7452	34.0003	34.5147	0.752292	-0.288958	3.91404	-4.203	ROCK1	-	-
chr14:103090486-103090536:mpeak_25229|chr14_103058995_103192804_RCOR1_NM_+|	124.5	-6.35642	2.37826	-2.67272	0.0075239	0.268399	0.840412	6.29188	0	10.656	8.68093	1.46871	5.88289	43.1443	1374.78	1.52229	25.3194	15.4215	0.751399	-1.54454	5.07421	-6.61875	RCOR1	-	-
chr2:212640696-212640757:mpeak_45970|chr2_212248785_213403352_ERBB4_NM_-|	49.8187	-7.47725	3.00571	-2.48768	0.0128579	0.35164	4.20206	0	0	3.80573	9.40434	5.87484	0	0	561.952	3.80573	2.17023	6.6092	0.747761	-2.18326	5.48065	-7.66392	ERBB4	-	-
chr12:122262340-122262390:mpeak_20350|chr12_122242637_122267971_SETD1B_NM_+|	516.325	-6.13469	2.56968	-2.38734	0.0169708	0.411792	15.1274	0	0	11.4172	0.723411	3.67178	10.9254	249.877	5820.22	12.9395	15.1916	55.811	0.746293	-0.0638877	6.17878	-6.24266	SETD1B	-	chr12_121824505_+
chrX:109263586-109263711:mpeak_82078|chrX_109245862_109416472_TMEM164_NM_+|	47.3953	-4.25161	1.92967	-2.20329	0.0275744	0.491953	0	0.89884	0	8.3726	3.61705	5.14049	89.9241	29.2123	250.872	49.4745	62.9367	68.295	0.728773	-4.25233	1.03391	-5.28624	TMEM164	-	chrX_110020479_+
chr18:18571131-18571183:mpeak_36060|chr18_18531348_18691812_ROCK1_NM_-|	116.896	-5.70059	2.21176	-2.5774	0.00995475	0.295107	1.68082	4.4942	0	13.7006	8.68093	3.67178	5.88289	35.0548	1244.32	16.7452	34.0003	34.5147	0.720674	-2.07695	3.91404	-5.991	ROCK1	-	-
chr17:2030911-2031079:mpeak_31454|chr17_1964916_2207069_SMG6_NM_-|	79.9114	-5.43136	1.95405	-2.77954	0.00544356	0.236365	3.36165	0.44942	0	7.61146	8.68093	5.87484	19.3295	145.612	677.353	23.5955	32.5535	34.5147	0.678694	-2.54016	3.21573	-5.75589	SMG6	-	chr17_2127610_-
chr10:120810710-120810837:mpeak_11814|chr10_120795780_120840334_EIF3A_NM_-|	264.672	-3.78249	1.79263	-2.11001	0.0348571	0.551254	3.36165	8.9884	0	6.08916	7.23411	8.81226	167.242	285.831	2378.26	94.3821	99.8307	116.028	0.654287	-0.841848	3.19002	-4.03187	EIF3A	chr10:120810710:-	chr10_119051198_-;chr10_119051311_-
chr1:84552601-84552663:mpeak_3223|chr1_84543657_84700862_PRKACB_NM_+|	151.251	-5.06235	2.22081	-2.27951	0.0226367	0.455362	3.36165	4.04478	0	1.52229	5.78729	6.6092	57.148	4.4942	1650.73	26.6401	26.7662	27.9055	0.648785	-0.910182	4.39639	-5.30657	PRKACB	-	chr1_84086974_+
chr2:212641197-212641275:mpeak_45972|chr2_212248785_213403352_ERBB4_NM_-|	52.9845	-8.21096	2.7985	-2.93406	0.00334558	0.181985	5.88289	1.34826	0	22.0732	22.4257	9.54662	0	0	561.952	3.80573	2.17023	6.6092	0.643395	-2.90188	5.48065	-8.38253	ERBB4	-	chr2_211776495_-
chr1:204240446-204240509:mpeak_7206|chr1_204191907_204329057_PLEKHA6_NM_-|	154.696	-4.99172	2.04081	-2.44594	0.0144474	0.373779	4.20206	2.69652	0	6.85031	5.06388	4.40613	28.574	61.5705	1635.68	41.1019	41.2344	24.9681	0.599589	-1.2423	4.00751	-5.2498	PLEKHA6	-	-
chr18:18629788-18629853:mpeak_36069|chr18_18531348_18691812_ROCK1_NM_-|	116.631	-5.75256	2.18767	-2.62953	0.00855018	0.274583	0.840412	1.79768	5.01743	4.56687	4.34046	12.484	5.88289	35.0548	1244.32	16.7452	34.0003	34.5147	0.59564	-1.48246	3.91404	-5.3965	ROCK1	-	-
chr8:104780717-104780789:mpeak_76048|chr8_104512975_105263829_RIMS2_NM_+|	134.475	-11.4119	2.76769	-4.12327	3.73536e-05	0.00528286	4.20206	4.4942	5.01743	9.89489	3.61705	5.14049	0	55.2786	1525.3	0.761146	0	0	0.578425	-0.443747	11.02	-11.4637	RIMS2	-	-
chr6:155129821-155129942:mpeak_69250|chr6_155054511_155153072_SCAF8_NM_+|	143.605	-6.10904	2.47193	-2.47136	0.0134599	0.35629	0	3.14594	0	9.13375	4.34046	0	10.0849	113.703	1510.25	11.4172	32.5535	28.6399	0.577578	-2.09864	4.49212	-6.59075	SCAF8	-	-
chr17:17000489-17000655:mpeak_32198|chr17_16946073_17088136_MPRIP_NM_+|	395.747	-5.74759	1.82495	-3.14945	0.00163577	0.126878	10.9254	6.29188	0	9.13375	20.9789	17.6245	105.052	711.432	3662.72	71.5477	74.5113	58.7484	0.576572	-1.47126	4.4509	-5.92216	MPRIP	chr17:17000544:+;chr17:17000653:+	chr17_17097225_+
chr1:82190212-82190264:mpeak_3199|chr1_82165454_82456074_ADGRL2_NM_+|	140.206	-8.59887	2.4766	-3.47205	0.000516507	0.0608741	0.840412	5.39304	0	3.80573	2.17023	5.87484	4.20206	62.9188	1590.53	4.56687	2.17023	0	0.564063	-0.926882	7.94279	-8.86967	ADGRL2	-	chr1_81724580_+
chr16:84522788-84522840:mpeak_30953|chr16_84513632_84538288_TLDC1_NM_-|	28.4312	-4.86238	2.23394	-2.1766	0.0295104	0.503712	0	0.44942	0	3.04458	7.23411	2.20307	26.0528	210.778	5.01743	43.3853	20.9789	22.0307	0.557482	-4.79561	1.48508	-6.2807	TLDC1	chr16:84522786:-	chr16_84489182_-
chr1:185274121-185274195:mpeak_6777|chr1_185267420_185286461_IVNS1ABP_NM_-|	219.713	-4.01498	1.88903	-2.12542	0.0335519	0.550873	5.88289	2.2471	0	2.28344	7.95752	7.34355	58.8289	389.647	1896.59	78.398	88.9795	98.4036	0.520027	-1.11298	3.14132	-4.2543	IVNS1ABP	chr1:185274121:-	chr1_185304982_-
chr11:46811478-46811663:mpeak_13411|chr11_46765815_46867859_CKAP5_NM_-|	156.21	-4.78295	1.99046	-2.40294	0.016264	0.406599	0	2.69652	0	1.52229	10.1278	3.67178	92.4454	399.085	1138.96	65.4585	66.5538	93.9975	0.496144	-2.50642	2.85085	-5.35726	CKAP5	chr11:46811482:-	chr11_46789932_-
chr7:72889213-72889269:mpeak_71333|chr7_72856023_72936615_BAZ1B_NM_-|	95.8714	-5.50224	2.27254	-2.42118	0.0154701	0.394727	0.840412	2.69652	0	0	2.17023	9.54662	18.4891	79.9967	978.399	16.7452	18.8087	22.765	0.492662	-1.72801	4.20676	-5.93477	BAZ1B	chr7:72889215:-	chr7_73474886_-
chr14:31602705-31602853:mpeak_22938|chr14_31570273_31676729_HECTD1_NM_-|	348.967	-4.32618	2.1359	-2.02546	0.0428203	0.593995	2.52124	9.88724	0	12.1783	0.723411	4.40613	62.1905	257.068	3602.51	33.4904	101.278	101.341	0.474599	-0.480103	4.05398	-4.53408	HECTD1	-	-
chr16:89356458-89356510:mpeak_31162|chr16_89353521_89556969_ANKRD11_NR_-mpeak_31162|chr16_89335071_89556969_ANKRD11_NM_-||	115.764	-7.72494	2.34962	-3.28774	0.00100994	0.0989043	3.36165	0.89884	0	5.32802	8.68093	2.93742	1.68082	46.2903	1299.51	2.28344	10.8512	7.34355	0.474271	-1.99189	6.04004	-8.03193	ANKRD11	chr16:89356459:-	chr16_89290051_-
chr10:61865706-61865827:mpeak_10014|chr10_61789584_62493284_ANK3_NM_-|	203.91	-5.5473	2.38181	-2.32903	0.0198576	0.437655	3.36165	0	0	7.61146	2.89364	11.7497	55.4672	8.08956	2112.34	81.4426	83.1922	80.7791	0.463485	-2.72687	3.14832	-5.87519	ANK3	-	-
chr5:179325826-179325885:mpeak_64943|chr5_179291128_179334856_TBC1D9B_NM_-|	106.735	-3.47055	1.6669	-2.08204	0.0373387	0.563496	1.68082	0.44942	0	7.61146	5.78729	8.07791	318.516	119.546	316.098	167.452	145.406	190.198	0.423699	-3.33368	0.584153	-3.91783	TBC1D9B	chr5:179325829:-	chr5_179898828_-
chr4:69189887-69189946:mpeak_58180|chr4_69180041_69215824_YTHDC1_NM_-|	179.976	-5.46835	2.32117	-2.35586	0.0184798	0.422364	0	2.69652	0	0.761146	7.23411	7.34355	19.3295	87.1875	1861.47	33.4904	52.809	87.3883	0.411058	-2.50802	3.50215	-6.01017	YTHDC1	-	-
chr18:22017913-22018013:mpeak_36195|chr18_22006608_22030742_IMPACT_NM_+|	60.3387	-5.20607	2.00554	-2.59584	0.00943601	0.286554	0.840412	0.44942	0	9.13375	12.298	7.34355	35.2973	22.9204	446.551	47.191	76.6815	65.3576	0.383294	-4.47957	1.41548	-5.89506	IMPACT	-	-
chr9:137987767-137987869:mpeak_80075|chr9_137967088_138011349_OLFM1_NM_+|	121.553	-5.79126	2.58311	-2.24197	0.0249631	0.473937	1.68082	0	0	9.13375	0.723411	2.20307	66.3926	0.44942	1259.37	32.7293	46.2983	39.6552	0.380215	-2.84302	3.48213	-6.32515	OLFM1	-	chr9_135095932_+;chr9_135095965_+
chr1:151427224-151427275:mpeak_5324|chr1_151378940_151431941_POGZ_NM_-|	177.466	-6.45018	2.27848	-2.83092	0.0046415	0.212736	4.20206	0.89884	0	4.56687	0	7.34355	32.7761	92.1311	1941.75	18.2675	15.915	11.7497	0.370229	-1.2234	5.49165	-6.71505	POGZ	-	-
chr18:55712646-55712729:mpeak_36769|chr18_55711609_56063398_NEDD4L_NM_+|	217.578	-5.74444	2.13276	-2.69343	0.00707206	0.261244	2.52124	3.59536	0	6.85031	1.44682	5.14049	18.4891	120.445	2368.23	25.879	26.7662	31.5773	0.365948	-1.13548	4.89571	-6.03118	NEDD4L	chr18:55712703:+;chr18:55712732:+	chr18_58045482_+
chr9:96438028-96438082:mpeak_78510|chr9_96338908_96439869_PHF2_NM_+|	287.924	-5.744	2.17767	-2.63768	0.0083476	0.274237	5.04247	2.69652	0	4.56687	8.68093	13.9527	94.1262	13.0332	3130.88	32.7293	76.6815	72.7012	0.358504	-1.81342	4.15222	-5.96564	PHF2	-	-
chr1:11081997-11082157:mpeak_524|chr1_11072678_11082180_TARDBP_NM_+|	1302.32	-5.793	1.91016	-3.03273	0.0024235	0.162113	36.1377	5.39304	5.01743	30.4458	60.7665	51.4049	297.506	761.317	13597.2	201.704	289.364	291.539	0.317604	-1.61535	4.22707	-5.84242	TARDBP	chr1:11082051:+;chr1:11082148:+	chr1_11022050_+;chr1_11022089_+
chr10:255941-255996:mpeak_8702|chr10_180404_298287_ZMYND11_NM_+|	821.307	-4.04599	1.91051	-2.11775	0.0341961	0.550873	11.7658	1.34826	0	45.6687	29.6598	50.6705	594.171	199.093	5614.5	1207.18	1171.93	929.694	0.306987	-3.26423	0.953516	-4.21775	ZMYND11	-	-
chr6:160172144-160172300:mpeak_69400|chr6_160148029_160176059_WTAP_NM_+|	137.194	-6.92698	2.12809	-3.25502	0.00113385	0.105077	2.52124	0.44942	0	1.52229	7.95752	11.0153	23.5315	131.68	1399.86	15.2229	20.2555	32.3116	0.286545	-2.78643	4.51977	-7.30619	WTAP	chr6:160172198:+;chr6:160172304:+	chr6_159751162_+;chr6_159751269_+
chr2:65325110-65325204:mpeak_42091|chr2_65315824_65357435_RAB1A_NM_-|	443.767	-3.54242	1.73502	-2.04172	0.0411795	0.588412	4.20206	1.79768	0	19.0286	10.1278	16.8902	437.855	313.695	2674.29	462.015	804.433	580.875	0.262698	-2.94012	0.891022	-3.83114	RAB1A	-	-
chr8:41798911-41798965:mpeak_74628|chr8_41792385_41909544_KAT6A_NM_-|	320.968	-4.62416	2.02767	-2.28054	0.0225759	0.455362	2.52124	3.59536	0	4.56687	4.34046	8.81226	58.8289	153.252	3281.4	127.111	90.4264	116.762	0.262629	-1.53455	3.38545	-4.91999	KAT6A	-	chr8_41941395_-
chr10:267246-267308:mpeak_8703|chr10_180404_298287_ZMYND11_NM_+|	824.036	-4.16069	1.90269	-2.18674	0.0287618	0.496065	3.36165	8.08956	5.01743	121.783	10.8512	22.765	594.171	199.093	5614.5	1207.18	1171.93	929.694	0.25701	-3.23819	0.953516	-4.1917	ZMYND11	-	-
chr13:27648909-27649047:mpeak_21064|chr13_27643521_27746033_USP12_NM_-|	128.468	-5.36372	2.10382	-2.54951	0.0107874	0.306963	0.840412	1.34826	0	8.3726	9.40434	4.40613	16.8082	59.3234	1224.25	75.3534	63.6602	77.8417	0.252464	-3.34133	2.58413	-5.92547	USP12	chr13:27648908:-;chr13:27648935:-;chr13:27648995:-	chr13_27074772_-;chr13_27074860_-
chr12:112731373-112731424:mpeak_19956|chr12_112600327_112819896_HECTD4_NM_-|	47.1964	-8.11142	2.46906	-3.28522	0.00101901	0.0989043	0	0.44942	0	0	7.23411	4.40613	4.20206	75.0531	456.586	5.32802	7.95752	5.14049	0.251615	-4.69491	4.86199	-9.5569	HECTD4	chr12:112731372:-	chr12_112293570_-
chr12:67665003-67665053:mpeak_18673|chr12_67663060_67706385_CAND1_NM_+|	230.951	-4.07622	2.05023	-1.98818	0.0467919	0.609526	0	1.79768	0	1.52229	2.17023	10.281	300.868	132.579	1715.96	176.586	239.449	190.198	0.250908	-2.95849	1.826	-4.78448	CAND1	chr12:67665054:+	chr12_67271273_+
chr22:29692220-29692360:mpeak_50457|chr22_29663997_29696111_EWSR1_NM_+|	263.016	-3.60553	1.82267	-1.97816	0.0479105	0.613018	1.68082	2.69652	0	2.28344	5.06388	5.87484	297.506	210.778	2132.41	131.678	209.066	157.152	0.248648	-1.59483	2.407	-4.00183	EWSR1	-	-
chr12:122248849-122248912:mpeak_20349|chr12_122242637_122267971_SETD1B_NM_+|	515.442	-6.00986	2.24987	-2.67121	0.00755787	0.268399	4.20206	5.84246	0	2.28344	4.34046	3.67178	10.9254	249.877	5820.22	12.9395	15.1916	55.811	0.247767	-0.0356302	6.17878	-6.21441	SETD1B	chr12:122248907:+	chr12_121810995_+
chr2:97527896-97528074:mpeak_43048|chr2_97527192_97535735_SEMA4C_NM_-|	188.688	-8.44313	2.28199	-3.69989	0.000215689	0.0288558	0.840412	2.69652	0	5.32802	7.95752	3.67178	10.0849	83.5921	2127.39	1.52229	7.95752	13.2184	0.238867	-2.26134	6.61253	-8.87387	SEMA4C	chr2:97528019:-	chr2_96862283_-
chr1:155444817-155445010:mpeak_5625|chr1_155307542_155532324_ASH1L_NM_-|	288.878	-5.52822	2.23658	-2.47173	0.013446	0.35629	1.68082	3.14594	0	3.80573	5.78729	2.20307	10.9254	93.9288	3206.14	26.6401	53.5324	58.7484	0.21867	-1.28918	4.57493	-5.86411	ASH1L	-	-
chr9:138773470-138773520:mpeak_80094|chr9_138703457_138799005_CAMSAP1_NM_-|	596.132	-4.3826	2.16978	-2.01984	0.0434001	0.593995	6.7233	3.14594	5.01743	4.56687	0.723411	0.734355	33.6165	244.484	6718.34	35.0127	56.426	44.7957	0.212775	1.30507	5.68246	-4.37738	CAMSAP1	-	-
chr16:89458047-89458098:mpeak_31173|chr16_89353521_89556969_ANKRD11_NR_-mpeak_31173|chr16_89335071_89556969_ANKRD11_NM_-||	114.998	-8.95252	2.52068	-3.55164	0.000382843	0.0473769	0.840412	0	0	5.32802	2.17023	3.67178	1.68082	46.2903	1299.51	2.28344	10.8512	7.34355	0.187107	-3.73239	6.04004	-9.77243	ANKRD11	chr16:89458062:-	chr16_89391652_-
chr6:160434827-160434879:mpeak_69423|chr6_160390130_160525705_IGF2R_NM_+|	90.2009	-5.05363	1.96944	-2.56603	0.0102871	0.303102	0	0.44942	0	2.28344	3.61705	5.87484	464.748	288.528	75.2615	47.9522	108.512	85.1852	0.162728	-4.71156	1.77765	-6.48921	IGF2R	chr6:160434877:+	chr6_160013845_+
chr17:17000136-17000206:mpeak_32197|chr17_16946073_17088136_MPRIP_NM_+|	392.269	-6.23514	2.07225	-3.00887	0.00262219	0.165679	2.52124	1.79768	0	15.9841	2.17023	0.734355	105.052	711.432	3662.72	71.5477	74.5113	58.7484	0.144632	-2.12878	4.4509	-6.57968	MPRIP	chr17:17000207:+	chr17_17096892_+
chr16:85701867-85702033:mpeak_31003|chr16_85645028_85706010_GSE1_NM_+|	881.227	-4.58399	2.09371	-2.18941	0.0285669	0.494427	5.88289	1.79768	0	15.2229	2.89364	13.2184	542.906	83.5921	8564.75	275.535	504.941	563.985	0.125346	-2.02849	2.77323	-4.80172	GSE1	-	-
chr2:202624178-202624233:mpeak_45673|chr2_202566612_202645895_ALS2_NM_-|	99.5439	-7.40235	2.39939	-3.08509	0.00203489	0.148128	0	0.44942	0	1.52229	9.40434	1.46871	11.7658	54.3798	1048.64	12.1783	23.8726	30.8429	0.120943	-4.78559	4.05875	-8.84434	ALS2	chr2:202624175:-	-
chr10:5822411-5822473:mpeak_8866|chr10_5808115_5855512_GDI2_NM_-|	640.744	-3.88385	1.72841	-2.24707	0.0246356	0.473937	0	1.79768	0	4.56687	13.0214	13.9527	1453.07	1061.98	1951.78	839.544	1261.63	1087.58	0.120735	-4.13302	0.48626	-4.61928	GDI2	chr10:5822419:-	chr10_5780452_-
chr15:99195744-99195853:mpeak_28030|chr15_99191767_99500289_IGF1R_NM_+|	145.167	-4.52916	1.96795	-2.30146	0.0213657	0.445951	0	0.44942	0	5.32802	0.723411	5.87484	278.176	236.395	702.44	139.29	175.789	197.542	0.110784	-4.72994	1.24738	-5.97732	IGF1R	-	-
chr14:105921484-105921575:mpeak_25399|chr14_105886185_105936401_MTA1_NM_+|	419.162	-5.49953	1.98917	-2.76474	0.0056969	0.242222	2.52124	0.44942	0	8.3726	14.4682	7.34355	374.824	130.781	3753.04	136.245	357.365	244.54	0.104634	-3.34495	2.52841	-5.87336	MTA1	chr14:105921535:+;chr14:105921574:+	chr14_105455232_+;chr14_105455251_+
chr16:89493017-89493090:mpeak_31175|chr16_89353521_89556969_ANKRD11_NR_-mpeak_31175|chr16_89335071_89556969_ANKRD11_NM_-||	116.248	-10.4831	2.50595	-4.18327	2.8735e-05	0.00418348	0	0.44942	0	7.61146	9.40434	9.54662	1.68082	46.2903	1299.51	2.28344	10.8512	7.34355	0.100057	-5.88518	6.04004	-11.9252	ANKRD11	chr16:89493014:-;chr16:89493039:-	chr16_89426609_-
chrX:53706811-53706861:mpeak_81193|chrX_53560372_53713674_HUWE1_NM_-|	452.398	-5.18576	1.95985	-2.64599	0.00814519	0.274134	0	1.34826	0	6.08916	2.17023	2.93742	179.848	2196.76	2423.42	232.911	197.491	185.792	0.0842657	-3.05392	2.96159	-6.01551	HUWE1	chrX:53706809:-	-
chr9:139433656-139433721:mpeak_80160|chr9_139392010_139440238_NOTCH1_NM_-|	16.3124	-7.72644	2.16553	-3.56791	0.000359833	0.0456711	0	0	0	5.32802	6.5107	2.20307	24.372	111.007	30.1046	3.80573	4.34046	8.07791	#DIV/0!	-Inf	3.35047	-Inf	NOTCH1	-	-
chr13:79197853-79197911:mpeak_21979|chr13_79191257_79233314_RNF219_NM_-|	5.16018	-7.51585	3.0689	-2.44904	0.0143239	NA	0	0	0	2.28344	9.40434	0	0.840412	39.9984	5.01743	0.761146	3.61705	0	#DIV/0!	-Inf	3.38871	-Inf	RNF219	chr13:79197854:-	chr13_78623720_-
chr3:63897802-63897863:mpeak_53359|chr3_63850232_63985125_ATXN7_NM_+|	27.4888	-7.18208	2.49082	-2.88342	0.00393383	0.19876	0	0	0	12.1783	2.89364	1.46871	5.88289	12.5838	250.872	5.32802	17.3619	21.2963	#DIV/0!	-Inf	2.6143	-Inf	ATXN7	-	-
chr9:94054320-94054489:mpeak_78413|chr9_93976707_94124251_AUH_NM_-|	13.0097	-7.17891	2.39239	-3.00073	0.00269335	0.165679	0	0	0	6.08916	5.06388	3.67178	10.9254	2.2471	110.383	5.32802	5.06388	7.34355	#DIV/0!	-Inf	2.80046	-Inf	AUH	chr9:94054318:-	-
chr9:94053729-94053848:mpeak_78411|chr9_93976707_94124251_AUH_NM_-|	12.8833	-7.02439	2.40699	-2.91833	0.00351913	0.185316	0	0	0	3.80573	2.89364	6.6092	10.9254	2.2471	110.383	5.32802	5.06388	7.34355	#DIV/0!	-Inf	2.80046	-Inf	AUH	chr9:94053725:-;chr9:94053803:-;chr9:94053846:-	chr9_91291450_-;chr9_91291477_-;chr9_91291522_-
chr7:107818593-107818645:mpeak_72549|chr7_107790592_108096841_NRCAM_NM_-mpeak_72549|chr7_107790592_108096841_NRCAM_NM_-||	68.8398	-7.0136	2.5116	-2.79249	0.00523048	0.229123	0	0	0	1.52229	10.8512	6.6092	29.4144	3.59536	632.196	62.4139	37.6174	41.8582	#DIV/0!	-Inf	2.22903	-Inf	NRCAM	chr7:107818590:-	chr7_108178148_-
chr14:99958285-99958336:mpeak_25071|chr14_99947738_99976493_CCNK_NM_+|	127.124	-6.62607	2.39181	-2.77032	0.00560019	0.241052	0	0	0	10.656	1.44682	4.40613	33.6165	61.5705	1118.89	47.9522	131.661	115.294	#DIV/0!	-Inf	2.04153	-Inf	CCNK	-	-
chr7:108136711-108136771:mpeak_72560|chr7_108113119_108168605_PNPLA8_NM_-|	15.3581	-6.15648	2.27419	-2.7071	0.00678731	0.254524	0	0	0	1.52229	14.4682	11.0153	12.6062	9.88724	80.2789	12.1783	16.6384	25.7024	#DIV/0!	-Inf	0.914615	-Inf	PNPLA8	chr7:108136712:-	-
chr19:46499548-46499602:mpeak_39416|chr19_46498718_46521547_CCDC61_NM_+|	3.56682	-6.0468	2.50655	-2.4124	0.0158481	NA	0	0	0	3.80573	5.06388	5.87484	6.7233	13.932	0	2.28344	1.44682	3.67178	#DIV/0!	-Inf	1.48052	-Inf	CCDC61	chr19:46499600:+	chr19_45996340_+
chr10:12292051-12292105:mpeak_9042|chr10_12237960_12292309_CDC123_NM_+|	236.317	-5.9769	2.20469	-2.71099	0.00670835	0.254524	0	0	0	4.56687	5.78729	8.81226	179.848	85.3898	1685.86	248.895	305.279	311.367	#DIV/0!	-Inf	1.17261	-Inf	CDC123	-	-
chr10:128798878-128798932:mpeak_12047|chr10_128593977_129249595_DOCK1_NM_+|	2.76815	-5.90094	2.79128	-2.11406	0.0345102	NA	0	0	0	3.80573	8.68093	5.14049	4.20206	6.29188	0	0	2.89364	2.20307	#DIV/0!	-Inf	1.04192	-Inf	DOCK1	-	-
chr9:133493233-133493293:mpeak_79846|chr9_133454959_133512400_FUBP3_NM_+|	206.349	-5.86332	2.03411	-2.8825	0.00394535	0.19876	0	0	0	9.13375	3.61705	7.34355	204.22	336.166	1093.8	203.987	318.301	299.617	#DIV/0!	-Inf	0.991529	-Inf	FUBP3	-	-
chrX:57358273-57358326:mpeak_81296|chrX_57313109_57515189_FAAH2_NM_+|	4.71433	-5.81207	2.45764	-2.3649	0.0180351	NA	0	0	0	7.61146	3.61705	5.14049	22.6911	4.94362	0	4.56687	5.06388	2.93742	#DIV/0!	-Inf	1.13671	-Inf	FAAH2	chrX:57358327:+;chrX:57358356:+	chrX_57331893_+
chr12:79439115-79439167:mpeak_18982|chr12_79257772_79842697_SYT1_NM_+|	124.826	-5.79059	2.60107	-2.22624	0.0259982	0.480815	0	0	0	8.3726	0	5.87484	67.233	8.9884	1003.49	127.872	147.576	128.512	#DIV/0!	-Inf	1.41835	-Inf	SYT1	-	-
chr3:49035490-49035551:mpeak_52791|chr3_49027340_49044119_P4HTM_NM_+|	31.4417	-5.72432	2.31049	-2.47754	0.0132293	0.355897	0	0	0	22.0732	9.40434	23.4994	102.53	23.8193	0	50.9968	76.6815	68.295	#DIV/0!	-Inf	-0.633237	-Inf	P4HTM	chr3:49035548:+	chr3_48998115_+
chr5:135483517-135483572:mpeak_63420|chr5_135468533_135513025_SMAD5_NM_+|	109.14	-5.67354	2.12484	-2.6701	0.00758284	0.268399	0	0	0	5.32802	5.78729	1.46871	92.4454	169.881	692.405	90.5763	103.448	148.34	#DIV/0!	-Inf	1.47956	-Inf	SMAD5	-	-
chr13:114160010-114160087:mpeak_22421|chr13_114145307_114203739_TMCO3_NM_+|	12.0348	-5.58422	2.47995	-2.25174	0.0243386	NA	0	0	0	3.80573	20.2555	15.4215	41.1802	5.39304	0	4.56687	36.1705	17.6245	#DIV/0!	-Inf	-0.325527	-Inf	TMCO3	chr13:114160063:+;chr13:114160089:+	chr13_113505745_+
chr1:183517112-183517172:mpeak_6698|chr1_183441505_183520952_SMG7_NM_+|	233.91	-5.55005	2.30403	-2.40885	0.0160029	0.402301	0	0	0	1.52229	2.89364	9.54662	185.731	65.1659	1695.89	232.911	334.939	278.321	#DIV/0!	-Inf	1.20208	-Inf	SMG7	chr1:183517168:+	-
chr19:35769939-35769987:mpeak_38770|chr19_35759895_35770069_USF2_NM_+|	474.502	-5.3256	2.34287	-2.27311	0.0230197	0.45579	0	0	0	10.656	0	6.6092	512.651	295.718	2679.31	661.436	813.114	714.528	#DIV/0!	-Inf	0.671944	-Inf	USF2	-	-
chr17:26961315-26961381:mpeak_32569|chr17_26942264_26972177_KIAA0100_NM_-|	183.928	-5.18068	2.28432	-2.26793	0.0233334	0.458335	0	0	0	5.32802	15.1916	11.0153	443.738	507.395	5.01743	424.719	426.089	368.646	#DIV/0!	-Inf	-0.350927	-Inf	KIAA0100	chr17:26961330:-	chr17_28634313_-
chr15:40266066-40266133:mpeak_25843|chr15_40226324_40327227_EIF2AK4_NM_+|	15.8635	-5.16151	2.39507	-2.15506	0.0311571	0.521039	0	0	0	6.08916	3.61705	11.0153	21.8507	68.7612	0	44.9076	26.0428	8.07791	#DIV/0!	-Inf	0.197332	-Inf	EIF2AK4	chr15:40266133:+	chr15_39973926_+
chr5:112204040-112204097:mpeak_62709|chr5_112196884_112227299_SRP19_NM_+|	18.6585	-5.15285	2.19196	-2.3508	0.0187333	0.423119	0	0	0	2.28344	12.298	5.87484	15.1274	12.1343	85.2963	31.207	35.4471	24.2337	#DIV/0!	-Inf	0.308511	-Inf	SRP19	chr5:112204092:+	chr5_112868393_+
chr9:20721471-20721524:mpeak_77397|chr9_20658307_20995554_FOCAD_NM_+|	47.4489	-4.81056	2.40117	-2.00343	0.0451314	0.598026	0	0	0	2.28344	3.61705	5.87484	87.4029	257.068	0	61.6528	83.1922	68.295	#DIV/0!	-Inf	0.692581	-Inf	FOCAD	-	-
chr15:45893599-45893658:mpeak_26286|chr15_45879416_45898592_BLOC1S6_NM_+|	14.5527	-4.79818	2.42613	-1.97771	0.0479612	0.613018	0	0	0	6.08916	15.1916	24.2337	1.68082	34.6053	0	26.6401	41.9578	24.2337	#DIV/0!	-Inf	-1.3552	-Inf	BLOC1S6	chr15:45893654:+	chr15_45601474_+
chr3:195613855-195613929:mpeak_56551|chr3_195591058_195635880_TNK2_NM_-|	17.8182	-4.66174	2.30013	-2.02673	0.0426904	0.593995	0	0	0	6.08916	0	5.87484	47.9035	55.7281	15.0523	19.0286	31.8301	32.3116	#DIV/0!	-Inf	0.512983	-Inf	TNK2	-	-
chr2:55838582-55838648:mpeak_41833|chr2_55777142_55844860_SMEK2_NM_-|	56.94	-4.61374	2.13502	-2.16098	0.0306969	0.516836	0	0	0	1.52229	5.06388	11.0153	56.3076	44.4926	225.784	76.1146	140.342	122.637	#DIV/0!	-Inf	-0.0542269	-Inf	SMEK2	chr2:55838587:-	chr2_55611451_-
chr2:55841628-55841743:mpeak_41836|chr2_55777142_55844860_SMEK2_NM_-|	56.9345	-4.60861	2.12181	-2.17202	0.0298544	0.507833	0	0	0	1.52229	9.40434	6.6092	56.3076	44.4926	225.784	76.1146	140.342	122.637	#DIV/0!	-Inf	-0.0542269	-Inf	SMEK2	chr2:55841654:-;chr2:55841685:-	chr2_55614519_-
chrX:152001553-152001607:mpeak_82703|chrX_151999510_152037327_NSDHL_NM_+|	80.5826	-4.50043	2.23913	-2.0099	0.044442	0.597793	0	0	0	4.56687	5.78729	11.0153	100.849	289.426	5.01743	208.554	174.342	167.433	#DIV/0!	-Inf	-0.47737	-Inf	NSDHL	-	-
chr17:59806262-59806321:mpeak_34537|chr17_59761501_59940920_BRIP1_NM_-|	42.5968	-4.47931	2.22093	-2.01686	0.0437098	0.593995	0	0	0	14.4618	15.915	19.0932	76.4775	30.1111	0	108.083	127.32	119.7	#DIV/0!	-Inf	-1.73618	-Inf	BRIP1	chr17:59806269:-	chr17_61728910_-
chr11:18370015-18370077:mpeak_12900|chr11_18343815_18387329_GTF2H1_NM_+|	28.1434	-4.1837	2.0112	-2.08021	0.0375066	0.564309	0	0	0	6.85031	7.95752	3.67178	57.9884	48.9868	20.0697	44.9076	69.4474	77.8417	#DIV/0!	-Inf	-0.597245	-Inf	GTF2H1	chr11:18370074:+	chr11_18348526_+
chr19:47241443-47241499:mpeak_39454|chr19_47223595_47249720_STRN4_NM_-|	75.4895	-4.09251	2.03976	-2.00636	0.0448174	0.598026	0	0	0	4.56687	0.723411	5.87484	142.87	124.489	190.662	115.694	140.342	180.651	#DIV/0!	-Inf	0.0688158	-Inf	STRN4	-	-
chr15:52098651-52098721:mpeak_26472|chr15_52043757_52100616_TMOD2_NM_+|	20.018	11.4229	3.30755	3.45358	0.000553206	0.063683	0	0	210.732	0.761146	2.17023	0	0	0	0	6.08916	6.5107	13.9527	#DIV/0!	6.16769	-Inf	Inf	TMOD2	-	-
chr10:125847092-125847149:mpeak_11953|chr10_125769855_125853123_CHST15_NM_-|	38.3158	23.3085	3.40227	6.85088	7.33977e-12	2.01844e-09	0	0	431.499	0	0	0	3.36165	9.43782	0	2.28344	0.723411	12.484	6742.45	Inf	-0.275336	Inf	CHST15	-	-
chr10:13629055-13629160:mpeak_9093|chr10_13628938_13672259_PRPF18_NM_+|	189.026	3.85036	1.93919	1.98555	0.0470834	0.610112	90.7645	30.1111	1580.49	153.751	121.533	179.917	7.56371	13.4826	0	26.6401	37.6174	26.4368	5389.28	1.90212	-2.10744	4.00956	PRPF18	-	-
chr3:134267891-134268000:mpeak_54918|chr3_134204574_134293634_CEP63_NM_+|	14.4443	4.62867	2.31224	2.00181	0.045305	0.598026	8.40412	3.59536	110.383	10.656	11.5746	16.1558	0.840412	0	0	0.761146	3.61705	7.34355	4854.08	1.67273	-3.80195	5.47468	CEP63	-	chr3_134549099_+
chr10:112343859-112344146:mpeak_11589|chr10_112327448_112363988_SMC3_NM_+|	232.577	5.39181	2.36843	2.27653	0.0228141	0.455362	5.04247	72.806	2513.73	25.1178	25.3194	24.2337	1.68082	53.481	0	6.85031	32.5535	30.1086	3132.1	5.11714	-0.3336	5.45074	SMC3	chr10:112343915:+	chr10_110584156_+;chr10_110584202_+;chr10_110584360_+;chr10_110584375_+
chr11:62283367-62283481:mpeak_13780|chr11_62201363_62314332_AHNAK_NM_-|	156.493	5.32834	2.00178	2.6618	0.00777251	0.269048	124.381	1283.09	10.0349	49.4745	75.2347	96.2005	23.5315	7.64014	0	60.8916	60.0431	87.3883	3031.62	2.68183	-2.74051	5.42234	AHNAK	chr11:62283374:-	chr11_62515903_-;chr11_62515967_-
chr20:8698312-8698374:mpeak_47161|chr20_8112911_8862268_PLCB1_NM_+|	12.8357	8.71718	3.0634	2.84559	0.00443291	0.209817	0	0	110.383	0	0	0.734355	4.20206	5.39304	0	12.9395	12.298	8.07791	2300.83	7.23183	-1.79582	9.02765	PLCB1	-	-
chr4:156276223-156276320:mpeak_59871|chr4_156269057_156298122_MAP9_NM_-|	20.8182	5.97717	2.25525	2.65034	0.00804103	0.272624	4.20206	0.89884	160.558	10.656	9.40434	1.46871	3.36165	2.2471	0	21.3121	18.0853	17.6245	1969.05	2.94385	-3.34576	6.28962	MAP9	chr4:156276223:-	chr4_155355155_-
chr18:72363533-72363697:mpeak_36944|chr18_72342918_72775105_ZNF407_NM_+|	24.6897	20.9779	5.43442	3.86018	0.000113302	0.015579	0	0	260.906	0	0	0	12.6062	13.932	0	3.04458	5.78729	0	1966.27	Inf	1.58728	Inf	ZNF407	-	chr18_74651645_+
chr3:69091873-69092100:mpeak_53480|chr3_69072471_69101484_TMF1_NM_-|	13.7694	4.95145	2.37431	2.08543	0.0370305	0.563496	0	4.94362	105.366	4.56687	8.68093	2.93742	1.68082	4.04478	0	22.0732	5.06388	5.87484	1926.6	2.76881	-2.52749	5.2963	TMF1	-	chr3_69042813_-;chr3_69042845_-;chr3_69042892_-
chr16:78597072-78597127:mpeak_30815|chr16_78133309_79245504_WWOX_NM_+|	36.01	23.7588	3.37256	7.04473	1.85818e-12	8.36182e-10	0	0	316.098	0	0	0	35.2973	0.89884	0	27.4012	29.6598	22.765	1746.58	Inf	-1.14102	Inf	WWOX	-	-
chr17:55623717-55623771:mpeak_34166|chr17_55333930_55756909_MSI2_NM_+|	20.6398	9.90439	3.12978	3.16457	0.00155314	0.126034	0	0	135.471	0	0	0	0.840412	4.04478	25.0872	16.7452	39.7876	25.7024	1355.96	Inf	-1.45612	Inf	MSI2	-	-
chr11:111863668-111863725:mpeak_15505|chr11_111797867_111889679_DIXDC1_NM_+|	14.0384	6.63545	3.31874	1.99939	0.0455662	0.599875	0	0	140.488	0	0	0	3.36165	17.9768	0	2.28344	3.61705	0.734355	1316.76	Inf	1.68532	Inf	DIXDC1	-	-
chr17:6526850-6526902:mpeak_31763|chr17_6483184_6544247_KIAA0753_NM_-|	24.59	8.23976	3.10355	2.65494	0.00793218	0.272623	0	0	215.749	0	0	0	8.40412	36.403	5.01743	6.85031	7.23411	15.4215	1299.05	Inf	0.755855	Inf	KIAA0753	-	-
chr15:72300169-72300298:mpeak_27223|chr15_72119384_72410440_MYO9A_NM_-|	16.023	7.0852	2.7189	2.6059	0.0091632	0.285269	0	4.4942	155.54	0	0	0.734355	5.88289	3.14594	10.0349	2.28344	7.95752	2.20307	1259.21	7.76769	0.615374	7.15232	MYO9A	-	-
chr1:150915117-150915170:mpeak_5224|chr1_150898814_150936722_SETDB1_NM_+|	30.2083	6.27055	3.09229	2.0278	0.0425802	0.593995	0	0	275.959	3.04458	0	0	14.287	30.1111	0	12.1783	16.6384	10.281	1243.11	6.50206	0.183414	6.31865	SETDB1	-	-
chr10:118783418-118783471:mpeak_11758|chr10_118646077_118886097_SHTN1_NM_-|	76.1787	25.2595	2.97126	8.50127	1.87523e-17	9.2824e-14	0.840412	0	561.952	0	0	0	40.3398	5.39304	30.1046	105.799	91.8732	77.8417	1113.16	Inf	-1.86114	Inf	SHTN1	-	-
chr16:54088586-54088703:mpeak_29953|chr16_53737874_54145673_FTO_NM_+|	42.8208	22.9573	3.28975	6.97844	2.98473e-12	1.2312e-09	0	0	376.307	0	0	0	18.4891	49.4362	0	26.6401	23.1491	19.8276	1108	Inf	-0.035488	Inf	FTO	-	chr16_54054836_+
chr17:55674243-55674317:mpeak_34169|chr17_55333930_55756909_MSI2_NM_+|	38.9073	5.18672	2.36788	2.19045	0.0284915	0.494427	10.9254	0.44942	316.098	22.8344	2.17023	2.20307	0.840412	4.04478	25.0872	16.7452	39.7876	25.7024	1092.58	3.58929	-1.45612	5.04542	MSI2	-	-
chr3:158178714-158178781:mpeak_55589|chr3_157827840_158261971_RSRC1_NM_+|	29.6644	4.94218	2.22607	2.22014	0.0264091	0.485966	7.56371	0.89884	280.976	5.32802	5.78729	4.40613	12.6062	5.39304	0	6.85031	18.0853	8.07791	1072.04	4.22092	-0.875121	5.09604	RSRC1	-	-
chr3:69088053-69088179:mpeak_53479|chr3_69072471_69101484_TMF1_NM_-|	11.9878	4.66938	2.21261	2.11035	0.0348285	NA	2.52124	1.79768	85.2963	3.80573	3.61705	8.07791	1.68082	4.04478	0	22.0732	5.06388	5.87484	1043.44	2.53141	-2.52749	5.0589	TMF1	-	-
chr16:53983446-53983497:mpeak_29950|chr16_53737874_54145673_FTO_NM_+|	40.7302	22.8551	3.2838	6.95995	3.40401e-12	1.29614e-09	0	0	351.22	0	0	0	18.4891	49.4362	0	26.6401	23.1491	19.8276	1034.14	Inf	-0.035488	Inf	FTO	-	-
chr8:133826762-133826998:mpeak_76643|chr8_133787603_133858025_PHF20L1_NM_+|	20.1947	7.47022	3.28094	2.27685	0.022795	0.455362	0	0	190.662	0	0	0	5.04247	31.9088	0	3.80573	6.5107	4.40613	1031.97	Inf	1.3276	Inf	PHF20L1	-	-
chr8:119099276-119099332:mpeak_76254|chr8_118812136_119124058_EXT1_NM_-|	290	21.2815	3.38867	6.28019	3.38157e-10	6.19955e-08	0	0	2664.26	0	0	0	7.56371	499.306	275.959	3.80573	17.3619	11.7497	1021.01	Inf	4.57178	Inf	EXT1	-	-
chr11:108568003-108568155:mpeak_15422|chr11_108535751_108810972_DDX10_NM_+|	21.4728	7.71089	3.28325	2.34855	0.0188467	0.423119	0	0	200.697	0	0	0	8.40412	31.01	0	2.28344	9.40434	5.87484	1018.4	Inf	1.1662	Inf	DDX10	-	-
chr11:27371869-27371992:mpeak_13005|chr11_27360582_27384795_CCDC34_NM_-|	172.792	5.23906	2.10022	2.49453	0.0126125	0.346844	33.6165	26.5158	1379.79	35.7738	46.2983	65.3576	21.0103	76.4014	0	84.4872	179.406	124.84	985.457	3.28789	-1.99661	5.28451	CCDC34	chr11:27371879:-	chr11_27350334_-;chr11_27350429_-
chr7:8245887-8245943:mpeak_70026|chr7_8153674_8302242_ICA1_NM_-|	84.1838	24.7445	3.04617	8.12315	4.54255e-16	1.12428e-12	0	0.44942	657.283	0	0	0	78.9988	3.14594	30.1046	102.755	87.5327	49.9362	878.936	Inf	-1.09767	Inf	ICA1	-	-
chr3:160129640-160129884:mpeak_55644|chr3_160117091_160151444_SMC4_NM_+|	135.05	5.67358	2.26401	2.50599	0.0122109	0.337675	0.840412	34.6053	1148.99	27.4012	7.95752	7.34355	10.9254	115.95	10.0349	54.0413	108.512	93.9975	865.118	4.79374	-0.906009	5.69975	SMC4	-	-
chr11:43740689-43740744:mpeak_13309|chr11_43702142_43876693_HSD17B12_NM_+|	192.084	24.7647	4.94652	5.00649	5.54303e-07	8.31454e-05	0	0	1550.39	0	0	0	226.071	162.69	0	137.767	116.469	111.622	797.604	Inf	0.0875974	Inf	HSD17B12	-	chr11_43719196_+
chr4:78694222-78694294:mpeak_58418|chr4_78641797_78740544_CNOT6L_NM_-|	181.585	21.3805	3.32189	6.43624	1.22472e-10	2.33168e-08	0	0	1540.35	0	0	0	12.6062	57.5257	521.813	18.2675	12.298	16.1558	780.656	Inf	3.66331	Inf	CNOT6L	-	-
chr11:117091838-117091888:mpeak_15649|chr11_117077072_117103241_PCSK7_NM_-|	29.0232	8.97617	3.01449	2.97768	0.00290444	0.171042	0	0	185.645	0	0	0	33.6165	32.3582	10.0349	17.5063	42.6812	26.4368	732.716	Inf	-0.188592	Inf	PCSK7	-	-
chr17:55485636-55485694:mpeak_34165|chr17_55333930_55756909_MSI2_NM_+|	21.5461	10.0281	2.97336	3.37265	0.000744497	0.0752094	0.840412	0	145.505	0	0	0	0.840412	4.04478	25.0872	16.7452	39.7876	25.7024	732.405	Inf	-1.45612	Inf	MSI2	-	-
chr3:148799410-148799476:mpeak_55302|chr3_148750159_148804341_HLTF_NM_-|	84.374	22.9349	3.19306	7.18272	6.83387e-13	3.87754e-10	0	0	592.057	0	0	0	143.711	105.614	5.01743	50.2356	60.0431	55.811	698.34	Inf	0.614805	Inf	HLTF	chr3:148799411:-	-
chr7:105138524-105138684:mpeak_72428|chr7_105098373_105162685_PUS7_NM_-|	9.4318	7.8371	3.1644	2.47665	0.0132623	NA	0	63.3682	0	0	0	0	18.4891	1.34826	0	1.52229	12.298	16.1558	638.878	Inf	-0.595594	Inf	PUS7	chr7:105138477:-;chr7:105138531:-	chr7_105498088_-
chr1:93113113-93113169:mpeak_3478|chr1_92979527_93257961_EVI5_NM_-|	21.975	7.94056	3.12785	2.53866	0.0111278	0.312969	0	0	150.523	0.761146	0	0	7.56371	39.9984	0	13.7006	16.6384	34.5147	632.953	7.62759	-0.447378	8.07497	EVI5	-	-
chr13:37621671-37621742:mpeak_21306|chr13_37583946_37633850_SUPT20H_NM_-|	11.7314	8.07183	3.03585	2.65884	0.00784108	NA	3.36165	0	90.3137	0	1.44682	0	0	7.64014	0	3.80573	20.2555	13.9527	613.048	6.01671	-2.31486	8.33157	SUPT20H	-	chr13_37047602_-
chr4:107248599-107248666:mpeak_59056|chr4_107236766_107268682_AIMP1_NM_+|	153.68	4.35195	2.08061	2.09167	0.0364681	0.560887	47.0631	25.6169	1319.58	23.5955	32.5535	24.2337	119.339	49.4362	0	74.5923	72.3411	55.811	549.95	4.1144	-0.264563	4.37897	AIMP1	-	chr4_106327492_+;chr4_106327547_+
chr1:46067975-46068096:mpeak_2355|chr1_46049659_46083732_NASP_NM_+|	214.284	6.56246	2.38231	2.75467	0.00587521	0.244389	0	23.3698	1710.94	3.80573	6.5107	0.734355	95.807	243.586	175.61	69.2643	133.831	107.95	505.137	7.29407	0.727454	6.56662	NASP	-	chr1_45602319_+
chr5:60377146-60377196:mpeak_61481|chr5_60240955_60448530_NDUFAF2_NM_+|	61.822	22.8572	3.04998	7.49421	6.67007e-14	6.60337e-11	0	0	326.133	0	0	0	107.573	66.9636	20.0697	62.4139	91.1498	67.5607	502.759	Inf	-0.184301	Inf	NDUFAF2	-	-
chr8:9473139-9473197:mpeak_73894|chr8_9413444_9634159_TNKS_NM_+|	14.9153	5.92883	2.57794	2.29984	0.0214575	0.445951	2.52124	1.79768	140.488	0	1.44682	0	11.7658	7.64014	0	4.56687	3.61705	5.14049	497.467	6.6451	0.542424	6.10268	TNKS	-	chr8_9615677_+
chrX:70766434-70766494:mpeak_81513|chrX_70752911_70793469_OGT_NM_+|	95.8688	20.7317	3.14671	6.58838	4.4464e-11	9.17069e-09	0	0	682.371	0	0	0	42.0206	213.474	165.575	11.4172	27.4896	8.07791	486.169	Inf	3.1638	Inf	OGT	-	chrX_71546706_+
chr16:78871294-78871345:mpeak_30816|chr16_78133309_79245504_WWOX_NM_+|	16.3584	8.67248	3.26935	2.65266	0.00798593	0.272623	0	0	80.2789	0	0	0	35.2973	0.89884	0	27.4012	29.6598	22.765	443.577	Inf	-1.14102	Inf	WWOX	-	-
chr3:28379990-28380117:mpeak_52130|chr3_28365945_28390618_AZI2_NM_-|	64.9054	4.89624	2.45424	1.99501	0.0460417	0.602926	0	9.43782	476.656	4.56687	3.61705	11.7497	35.2973	85.8392	0	40.3407	65.8304	45.53	401.278	4.60796	-0.324598	4.93256	AZI2	-	-
chr9:106891956-106892129:mpeak_78808|chr9_106856540_106901419_SMC2_NM_+|	53.6595	4.63758	2.00762	2.30999	0.0208887	0.445951	3.36165	4.04478	205.715	13.7006	12.298	20.5619	10.0849	41.3466	5.01743	93.6209	103.448	130.715	377.546	2.19449	-2.53772	4.73222	SMC2	-	-
chr7:23561671-23562067:mpeak_70291|chr7_23545188_23571660_TRA2A_NM_-|	584.838	7.13499	2.21527	3.22082	0.00127826	0.111006	5.88289	48.0879	3652.69	12.1783	15.915	31.5773	381.547	587.392	25.0872	589.888	867.37	800.447	372.894	5.95695	-1.1835	7.14046	TRA2A	-	chr7_23522106_-
chr14:23990300-23990350:mpeak_22743|chr14_23980968_24027903_THTPA_NR_+|	15.4397	7.81498	3.14706	2.48327	0.0130184	0.354072	0	0	85.2963	0	0	0	21.8507	24.7181	0	20.5509	12.298	20.5619	366.324	Inf	-0.197769	Inf	THTPA	-	-
chr1:227441759-227441862:mpeak_7966|chr1_227182100_227505826_CDC42BPA_NM_-|	19.0739	4.12903	2.02598	2.03804	0.0415457	0.588412	15.1274	7.64014	110.383	1.52229	3.61705	4.40613	0.840412	30.5606	5.01743	6.85031	26.7662	16.1558	365.615	3.8021	-0.450676	4.25278	CDC42BPA	-	chr1_227254064_-
chrX:118975066-118975232:mpeak_82222|chrX_118968990_118986991_UPF3B_NM_-|	26.2708	6.38067	2.95895	2.1564	0.0310525	0.521039	0	1.34826	230.802	0	1.44682	2.20307	0	33.2571	0	7.61146	22.4257	16.1558	349.024	5.99106	-0.474013	6.46508	UPF3B	-	chrX_119841143_-;chrX_119841168_-
chr10:46280301-46280358:mpeak_9781|chr10_46222647_46287708_FAM21C_NM_+|	17.1689	5.78843	2.73252	2.11835	0.0341458	0.550873	0	8.9884	130.453	0	0	1.46871	5.88289	34.1559	0	6.85031	8.68093	9.54662	348.266	6.56897	0.674985	5.89398	FAM21C	-	-
chr4:56345790-56345872:mpeak_58051|chr4_56301761_56413076_CLOCK_NM_-|	31.0574	5.17776	2.54784	2.03221	0.0421324	0.593995	0.840412	0	180.627	6.85031	3.61705	0.734355	23.5315	30.1111	0	39.5796	39.0642	47.7331	338.29	4.01792	-1.23628	5.2542	CLOCK	-	-
chr4:25250229-25250375:mpeak_57499|chr4_25235652_25278635_PI4K2B_NM_+|	12.4389	4.46558	2.23714	1.99611	0.0459219	NA	0	2.2471	50.1743	2.28344	4.34046	2.20307	5.88289	9.88724	0	18.2675	23.8726	30.1086	332.41	2.57017	-2.19578	4.76594	PI4K2B	chr4:25250291:+	-
chr5:78204685-78204743:mpeak_62038|chr5_78076485_78282357_ARSB_NM_-|	14.5096	7.41794	3.18819	2.32669	0.0199818	0.437655	0	0	80.2789	0	0	0	41.1802	7.64014	0	12.1783	13.7448	19.0932	328.875	Inf	0.117033	Inf	ARSB	-	-
chr16:53983704-53983756:mpeak_29951|chr16_53737874_54145673_FTO_NM_+|	20.6605	8.0484	3.18286	2.52867	0.0114496	0.3202	0	0	110.383	0	0	0	18.4891	49.4362	0	26.6401	23.1491	19.8276	325.014	Inf	-0.035488	Inf	FTO	-	chr16_53949855_+
chr1:85131801-85131900:mpeak_3252|chr1_85113290_85156240_SSX2IP_NM_-|	26.4158	4.64631	2.2788	2.03893	0.0414572	0.588412	0	2.2471	100.349	3.04458	8.68093	6.6092	13.4466	19.3251	0	52.519	56.426	54.3423	313.062	2.48432	-2.31689	4.80121	SSX2IP	-	chr1_84666119_-;chr1_84666203_-
chr1:204513695-204513824:mpeak_7228|chr1_204485506_204518240_MDM4_NM_+|	94.4981	4.208	1.89976	2.21501	0.0267592	0.488596	19.3295	6.7413	506.76	19.0286	18.0853	22.0307	100.849	53.9304	20.0697	117.216	128.767	121.169	304.737	3.17136	-1.07026	4.24162	MDM4	-	chr1_204544678_+
chr17:58468869-58468923:mpeak_34463|chr17_58256789_58469586_USP32_NM_-|	111.206	11.0698	3.07305	3.60222	0.000315509	0.0410993	0	0	200.697	0	0	0	139.508	62.9188	5.01743	200.181	396.429	329.726	290.242	Inf	-2.15881	Inf	USP32	-	-
chr12:32854408-32854503:mpeak_17328|chr12_32832133_32896287_DNM1L_NM_+|	185.287	4.97627	2.23579	2.22573	0.026032	0.480815	14.287	15.2803	1209.2	43.3853	23.1491	16.8902	88.2433	198.194	0	270.207	181.576	163.027	288.316	3.89229	-1.10192	4.99421	DNM1L	-	-
chr1:43852284-43852352:mpeak_2234|chr1_43850777_43855483_MED8_NM_-|	73.0333	22.0225	3.05205	7.21564	5.36793e-13	3.7959e-10	0	0	316.098	0	0	0	38.659	220.216	80.2789	47.191	102.724	71.2325	279.606	Inf	0.616928	Inf	MED8	-	chr1_43386626_-
chr12:80033601-80033667:mpeak_19008|chr12_79986473_80084790_PAWR_NM_-|	24.3701	8.49334	3.16044	2.68739	0.00720123	0.264045	0	0	95.3312	0	0	0	29.4144	45.8408	0	19.7898	49.1919	52.8736	253.354	Inf	-0.695305	Inf	PAWR	-	-
chr22:18370086-18370142:mpeak_50002|chr22_18273682_18507325_MICAL3_NM_-|	15.3336	6.10831	3.11222	1.96269	0.0496827	0.624186	0	0.44942	120.418	0	0	0	14.287	36.403	0	0.761146	4.34046	7.34355	238.445	Inf	2.02612	Inf	MICAL3	-	-
chr7:101463968-101464035:mpeak_72273|chr7_101459183_101926312_CUX1_NM_+|	113.814	11.1807	3.18036	3.51554	0.000438864	0.0529849	4.20206	0	672.336	0	0	0	259.687	26.0664	0	190.286	130.214	82.9821	236.755	Inf	-0.497734	Inf	CUX1	-	-
chr19:5255735-5255792:mpeak_37374|chr19_5206853_5340814_PTPRS_NM_-|	76.8462	22.7139	3.31501	6.85183	7.29117e-12	2.01844e-09	0	0	336.168	0	0	0	121.019	170.78	0	96.6655	98.3839	99.138	230.411	Inf	-0.0117605	Inf	PTPRS	-	-
chr3:127494445-127494504:mpeak_54617|chr3_127411166_127542093_MGLL_NM_-|	127.205	23.3805	3.387	6.90301	5.09137e-12	1.80016e-09	0	0	551.917	0	0	0	199.178	286.28	0	204.748	136.001	148.34	227.38	Inf	-0.0107504	Inf	MGLL	-	-
chr20:30339168-30339227:mpeak_47534|chr20_30326903_30388772_TPX2_NM_+|	158.618	22.6388	3.30418	6.85157	7.30423e-12	2.01844e-09	0	0	622.161	0	0	0	70.5946	768.957	5.01743	152.99	130.214	153.48	220.998	Inf	0.951625	Inf	TPX2	-	-
chr2:11389834-11389928:mpeak_40586|chr2_11323566_11484711_ROCK2_NM_-|	39.5635	4.7637	2.33225	2.04253	0.0410989	0.588412	0.840412	11.2355	270.941	3.80573	3.61705	3.67178	4.20206	81.345	0	22.0732	26.7662	46.2644	220.555	4.67297	-0.152785	4.82575	ROCK2	-	-
chrX:154279931-154280010:mpeak_82844|chrX_154255063_154282869_FUNDC2_NM_+|	139.587	6.12941	2.2183	2.76312	0.00572524	0.242222	18.4891	5.39304	737.562	12.1783	13.0214	4.40613	134.466	100.221	0	252.7	238.726	157.886	216.301	4.68478	-1.46818	6.15296	FUNDC2	-	chrX_155051734_+
chr17:64560081-64560131:mpeak_34804|chr17_64298925_64799990_PRKCA_NM_+|	26.268	6.08893	2.95729	2.05896	0.0394982	0.57845	0	0	115.401	0	0	0	22.6911	82.2438	55.1917	6.85031	13.7448	19.0932	216.205	Inf	2.01243	Inf	PRKCA	-	-
chr5:77357677-77357730:mpeak_62007|chr5_77298879_77590579_AP3B1_NM_-|	17.902	7.14527	3.19011	2.23982	0.0251028	0.474271	0	0	80.2789	0	0	0	62.1905	14.3814	0	10.656	27.4896	19.8276	209.682	Inf	0.401429	Inf	AP3B1	-	-
chr2:139318470-139318521:mpeak_44248|chr2_139259349_139326505_SPOPL_NM_+|	47.0739	9.26272	2.93278	3.15834	0.00158673	0.126682	0	0	75.2615	0	0	0	68.9138	34.1559	5.01743	97.4266	151.193	132.918	208.891	Inf	-1.81963	Inf	SPOPL	-	-
chr7:133634565-133634618:mpeak_73084|chr7_132937822_133749043_EXOC4_NM_+|	70.7714	9.32764	3.03814	3.07018	0.00213932	0.15128	0	0	190.662	0	0	0	173.965	89.884	10.0349	130.917	116.469	137.324	208.843	Inf	-0.490208	Inf	EXOC4	-	-
chr15:48460842-48461048:mpeak_26304|chr15_48446090_48470558_MYEF2_NR_-mpeak_26304|chr15_48435268_48470558_MYEF2_NM_-||	36.624	4.16623	2.03723	2.04505	0.0408503	0.588412	2.52124	2.69652	175.61	3.80573	5.06388	8.07791	59.6693	17.5274	10.0349	51.7579	54.2558	48.4674	207.296	3.41547	-0.82451	4.23998	MYEF2	-	chr15_48168724_-;chr15_48168828_-
chr20:30536597-30536686:mpeak_47551|chr20_30533692_30539883_PDRG1_NM_-|	82.2388	4.20716	2.08307	2.01969	0.0434157	0.593995	21.8507	33.7065	531.848	15.2229	3.61705	9.54662	35.2973	158.645	0	37.2961	76.6815	63.1546	201.917	4.37107	0.130803	4.24027	PDRG1	-	chr20_31948828_-
chr13:94826500-94826714:mpeak_22057|chr13_93879077_95055268_GPC6_NM_+|	32.9622	7.20165	3.01114	2.39167	0.0167718	0.409686	0	0	120.418	0	0	0	110.934	5.84246	65.2266	29.6847	29.6598	33.7803	198.488	Inf	0.966728	Inf	GPC6	-	-
chr16:18863446-18863548:mpeak_29030|chr16_18820968_18937726_SMG1_NM_-|	178.015	5.90895	2.25692	2.61814	0.00884099	0.278745	1.68082	7.64014	1184.11	3.04458	0.723411	6.6092	91.6049	304.257	215.749	116.455	86.8093	117.497	195.129	6.84556	0.931115	5.91444	SMG1	-	-
chr11:95583881-95583941:mpeak_15215|chr11_95568615_95657371_MTMR2_NM_-|	36.5225	9.12047	3.13271	2.91137	0.00359849	0.1875	0	0	90.3137	0	0	0	39.4994	56.1775	0	56.3248	104.895	91.0601	188.789	Inf	-1.39878	Inf	MTMR2	-	-
chr17:58322534-58322651:mpeak_34454|chr17_58256789_58469586_USP32_NM_-|	115.914	7.54198	2.50285	3.01336	0.00258373	0.165679	0	0.44942	250.872	0.761146	2.17023	2.93742	139.508	62.9188	5.01743	200.181	396.429	329.726	181.726	5.42032	-2.15881	7.57913	USP32	-	-
chr11:57068033-57068084:mpeak_13531|chr11_57067555_57092413_TNKS1BP1_NM_-|	32.2429	6.33786	2.87117	2.20741	0.0272852	0.491953	0	0.44942	185.645	0	0	0	33.6165	91.2322	45.1569	7.61146	19.5321	3.67178	164.195	Inf	2.46386	Inf	TNKS1BP1	-	-
chr9:100407894-100408022:mpeak_78641|chr9_100395704_100433367_NCBP1_NM_+|	125.042	4.37348	2.04161	2.14218	0.0321794	0.534523	16.8082	8.08956	566.97	22.0732	5.06388	11.7497	222.709	132.129	10.0349	159.079	151.193	194.604	162.212	3.92792	-0.468534	4.39646	NCBP1	-	-
chr14:50255935-50256070:mpeak_23333|chr14_50251431_50319791_NEMF_NM_-|	12.6159	4.99709	2.2328	2.23803	0.0252189	NA	1.68082	7.19072	45.1569	0	2.17023	2.20307	1.68082	21.1227	0	21.3121	21.7023	27.1711	157.953	3.62692	-1.62191	5.24884	NEMF	-	-
chr3:172473249-172473346:mpeak_55909|chr3_172468474_172537937_ECT2_NM_+|	47.2058	6.24592	2.82329	2.21229	0.0269468	0.488596	0	1.79768	180.627	5.32802	0	0	31.9357	83.5921	0	65.4585	84.6391	113.091	157.906	5.09756	-1.18786	6.28542	ECT2	-	-
chr13:25834742-25834848:mpeak_21024|chr13_25823630_25861704_MTMR6_NM_-|	55.9691	7.88163	2.79913	2.81575	0.00486638	0.217014	0	0	100.349	0.761146	0	0	113.456	39.9984	40.1394	108.083	141.065	127.778	155.504	7.04263	-0.961249	8.00388	MTMR6	-	-
chr1:119627037-119627089:mpeak_4608|chr1_119576011_119683295_WARS2_NM_-|	30.9118	8.29995	3.14986	2.63502	0.00841326	0.274237	0	0	85.2963	0	0	0	80.6796	30.1111	0	47.9522	57.8729	69.0294	153.977	Inf	-0.658317	Inf	WARS2	-	-
chr13:97463603-97463660:mpeak_22130|chr13_96743092_97484743_HS6ST3_NM_+|	100.46	20.5785	3.38406	6.081	1.19433e-09	2.1114e-07	0	0	356.238	0	0	0	40.3398	0.44942	667.318	64.6974	41.9578	34.5147	150.925	Inf	2.32654	Inf	HS6ST3	-	-
chr5:137735632-137735706:mpeak_63490|chr5_137688284_137771308_KDM3B_NM_+|	45.6935	6.64607	2.96492	2.24157	0.0249894	0.473937	0	0	155.54	0	0	0	36.1377	83.1427	190.662	28.9235	28.213	25.7024	150.551	Inf	1.90362	Inf	KDM3B	-	-
chr6:149838512-149838595:mpeak_69009|chr6_149826840_149867238_PPIL4_NM_-|	63.6014	7.88598	2.95984	2.66433	0.00771421	0.268911	0	0	180.627	0	0	0	54.6268	122.242	200.697	67.742	51.3622	85.9196	143.52	Inf	0.880939	Inf	PPIL4	-	chr6_149517362_-;chr6_149517396_-
chr22:38100402-38100462:mpeak_50772|chr22_38092994_38169789_TRIOBP_NM_+|	31.8028	8.01261	3.17362	2.52475	0.011578	0.321973	0	0	95.3312	0	0	0	94.9666	38.2007	0	35.0127	55.7026	62.4202	143.175	Inf	-0.201569	Inf	TRIOBP	-	-
chr1:35652051-35652106:mpeak_1757|chr1_35650194_35658743_SFPQ_NM_-|	1348.66	23.2329	3.37637	6.88104	5.94175e-12	1.96078e-09	0	0	4841.82	0	0	0	892.518	579.752	8755.42	250.417	462.26	401.692	142.021	Inf	3.19818	Inf	SFPQ	-	-
chr10:70665998-70666060:mpeak_10198|chr10_70661033_70706107_DDX50_NM_+|	66.6209	7.26728	2.72737	2.66457	0.00770857	0.268911	0.840412	0	265.924	1.52229	0	0	47.9035	109.209	125.436	59.3694	111.405	77.8417	141.621	7.45318	0.184577	7.2686	DDX50	-	-
chr4:100001130-100001265:mpeak_58854|chr4_99993592_100009939_ADH5_NM_-|	94.6934	6.95943	2.54325	2.73643	0.00621091	0.246462	1.68082	4.4942	426.482	0	0	4.40613	163.04	137.522	5.01743	96.6655	172.172	124.84	141.585	6.61757	-0.365465	6.98303	ADH5	chr4:100001137:-;chr4:100001170:-;chr4:100001218:-	chr4_99080065_-
chr17:61864567-61864643:mpeak_34682|chr17_61851548_61895053_DDX42_NM_+|	86.5247	7.76162	3.04447	2.54942	0.0107902	0.306963	0	0	265.924	0	0	0	55.4672	91.2322	431.499	59.3694	69.4474	65.3576	137.975	Inf	1.57421	Inf	DDX42	-	-
chr2:203139827-203139915:mpeak_45698|chr2_203130514_203168108_NOP58_NM_+|	56.755	5.47059	2.13904	2.5575	0.0105429	0.305189	12.6062	1.34826	205.715	7.61146	2.89364	4.40613	55.4672	52.1327	0	82.2037	120.086	136.59	136.102	3.88086	-1.6551	5.53596	NOP58	-	chr2_202275154_+
chr7:101901455-101901520:mpeak_72287|chr7_101459183_101926312_CUX1_NM_+|	106.704	5.31872	2.328	2.28467	0.0223319	0.455362	6.7233	7.64014	556.935	6.85031	10.1278	2.93742	259.687	26.0664	0	190.286	130.214	82.9821	133.284	4.84228	-0.497734	5.34002	CUX1	chr7:101901513:+	chr7_102258231_+
chr10:116285410-116285469:mpeak_11703|chr10_116196132_116444414_ABLIM1_NM_-|	65.8284	9.48237	3.19783	2.96525	0.00302433	0.172074	0	0	135.471	0	0	0	121.86	81.7944	0	162.124	139.618	149.074	133.04	Inf	-1.14642	Inf	ABLIM1	-	-
chr16:58200482-58200537:mpeak_30080|chr16_58192257_58231782_CSNK2A2_NM_-|	81.5622	6.3121	3.11668	2.02526	0.0428403	0.593995	0	0	275.959	0	0	0	18.4891	118.197	491.708	15.9841	22.4257	35.9834	131.745	Inf	3.07843	Inf	CSNK2A2	-	-
chr11:118957729-118957780:mpeak_15837|chr11_118955586_118963819_HMBS_NM_+|	52.6152	8.41494	3.23348	2.60244	0.00925635	0.285772	0	0	160.558	0	0	0	115.136	134.377	0	81.4426	74.5113	65.3576	128.697	Inf	0.173037	Inf	HMBS	-	-
chr1:44977132-44977247:mpeak_2292|chr1_44870959_45116375_RNF220_NM_+|	637.891	19.9188	3.47021	5.73993	9.47159e-09	1.56281e-06	0	0	2257.84	0	0	0	10.0849	377.513	4907.05	24.3567	48.4685	29.3742	127.932	Inf	5.69508	Inf	RNF220	-	-
chr4:7774037-7774374:mpeak_57228|chr4_7765518_7941653_AFAP1_NM_-|	25.8777	18.7934	2.76096	6.80682	9.97809e-12	2.46958e-09	0	78.1991	0	0	0	0	13.4466	74.1543	100.349	14.4618	12.298	17.6245	124.819	Inf	2.08222	Inf	AFAP1	chr4:7774314:-	-
chr8:17868114-17868174:mpeak_74052|chr8_17780365_17885145_PCM1_NM_+|	25.1301	5.19592	2.6228	1.98106	0.047585	0.613018	1.68082	0	85.2963	0	0	2.20307	5.88289	32.3582	70.244	47.9522	39.7876	16.1558	120.261	5.30305	0.0623631	5.24069	PCM1	-	chr8_18010665_+
chr3:185655605-185655662:mpeak_56309|chr3_185635513_185655924_TRA2B_NM_-|	331.945	5.54102	2.54328	2.17869	0.0293546	0.502787	0	43.5937	1294.5	0.761146	0	13.2184	328.601	376.614	1063.7	192.57	384.131	285.664	113.467	6.58072	1.03649	5.54423	TRA2B	-	-
chr16:58197511-58197683:mpeak_30078|chr16_58192257_58231782_CSNK2A2_NM_-|	98.001	6.13138	2.79443	2.19414	0.0282252	0.491953	0	5.84246	466.621	0.761146	0	0	18.4891	118.197	491.708	15.9841	22.4257	35.9834	112.779	9.27781	3.07843	6.19939	CSNK2A2	chr16:58197472:-;chr16:58197605:-;chr16:58197631:-	chr16_58163581_-;chr16_58163713_-;chr16_58163745_-
chr21:38462514-38462581:mpeak_49448|chr21_38445570_38573740_TTC3_NM_+|	36.0354	4.07723	2.03492	2.00363	0.0451097	0.598026	0	4.4942	35.122	6.08916	0.723411	4.40613	21.0103	31.4594	5.01743	131.678	95.4902	96.9349	103.37	1.82018	-2.49514	4.31533	TTC3	-	-
chr10:65339585-65339639:mpeak_10076|chr10_65281122_65380572_REEP3_NM_+|	113.177	10.1566	2.97385	3.41531	0.000637086	0.068556	0.840412	0	270.941	0	0	0	247.922	143.365	5.01743	180.392	290.811	218.838	102.869	Inf	-0.800074	Inf	REEP3	-	-
chr2:26024368-26024451:mpeak_40874|chr2_25967345_26101312_ASXL2_NM_-|	24.2208	7.88618	3.00375	2.62545	0.00865354	0.274583	0	0.89884	95.3312	0	0	0	10.0849	84.4909	0	15.9841	39.0642	44.7957	101.749	Inf	-0.078202	Inf	ASXL2	-	-
chr2:28498993-28499045:mpeak_41078|chr2_28113481_28561316_BRE_NM_+|	47.8533	7.63328	2.98434	2.55778	0.0105343	0.305189	0	0	80.2789	0	0	0	155.476	79.5473	5.01743	60.8916	104.171	88.857	100.331	Inf	-0.0810918	Inf	BRE	-	-
chr2:65301497-65301632:mpeak_42081|chr2_65283494_65310772_CEP68_NM_+|	4.79468	6.57618	3.25168	2.0224	0.0431355	NA	0	8.08956	0	0	0	0	0	8.53898	0	3.80573	23.1491	13.9527	94.7368	Inf	-2.26023	Inf	CEP68	chr2:65301624:+	chr2_65074488_+
chr1:46073880-46074015:mpeak_2360|chr1_46049659_46083732_NASP_NM_+|	109.825	3.80274	1.77302	2.14478	0.0319702	0.532837	15.1274	30.1111	426.482	10.656	4.34046	5.14049	95.807	243.586	175.61	69.2643	133.831	107.95	91.5957	4.55001	0.727454	3.82256	NASP	chr1:46074009:+	chr1_45608324_+
chr14:105181593-105181671:mpeak_25347|chr14_105155942_105185131_INF2_NM_+|	17.8135	5.48972	2.74093	2.00287	0.045191	0.598026	0	34.1559	0	0	0	0	60.5097	53.0315	5.01743	31.9681	19.5321	9.54662	86.4279	Inf	0.957613	Inf	INF2	chr14:105181663:+	chr14_104715342_+
chr7:76068398-76068521:mpeak_71525|chr7_76026840_76071158_ZP3_NM_+|	28.3912	5.6604	2.48993	2.27332	0.0230069	0.45579	0	22.0216	0	0	1.44682	0	35.2973	36.403	5.01743	116.455	52.0856	71.9668	86.114	3.92796	-1.64845	5.57641	ZP3	-	-
chr1:50956246-50956342:mpeak_2479|chr1_50907195_51425936_FAF1_NM_-|	46.8218	6.95969	2.86897	2.42585	0.0152726	0.391706	0	0	75.2615	0	0	0	36.1377	73.7049	175.61	49.4745	70.8943	80.7791	79.097	Inf	0.504995	Inf	FAF1	-	-
chr5:107585768-107585906:mpeak_62598|chr5_107197561_107717799_FBXL17_NM_-|	51.9757	8.30031	3.22048	2.57735	0.00995613	0.295107	0	0	75.2615	0	0	0	184.891	12.1343	0	105.038	120.81	125.575	76.3979	Inf	-0.834827	Inf	FBXL17	-	-
chr17:44159790-44159866:mpeak_33678|chr17_44109069_44302740_KANSL1_NM_-|	129.296	16.83	3.12933	5.37816	7.52515e-08	1.16405e-05	0	0.89884	511.778	0	0	0	5.88289	111.007	913.172	1.52229	3.61705	3.67178	74.6572	Inf	6.86919	Inf	KANSL1	-	-
chr2:122260741-122260816:mpeak_43844|chr2_122098523_122407052_CLASP1_NM_-|	99.9626	7.68896	2.67436	2.87507	0.00403939	0.199018	7.56371	0.44942	451.569	0	0	0	44.5419	178.869	401.394	32.7293	36.1705	46.2644	73.556	Inf	2.43971	Inf	CLASP1	-	-
chr2:47389418-47389548:mpeak_41629|chr2_47387943_47404075_CALM2_NM_-|	1871.26	5.01793	2.38195	2.10664	0.0351484	0.554092	21.8507	7.64014	8464.4	22.8344	7.95752	20.5619	1194.23	407.174	10029.8	450.598	952.732	875.351	73.0265	7.36981	2.35173	5.01808	CALM2	chr2:47389445:-	chr2_47162305_-
chr10:705751-705878:mpeak_8727|chr10_323517_735608_DIP2C_NM_-|	108.936	7.79205	2.98255	2.61255	0.00898704	0.281556	0	0	180.627	0	0	0	157.157	72.806	516.795	114.172	156.257	109.419	72.5646	Inf	0.975221	Inf	DIP2C	-	-
chr8:107284951-107285008:mpeak_76077|chr8_107282405_107763033_OXR1_NM_+|	14.2383	6.65616	2.76313	2.40892	0.0159997	0.402301	0	16.1791	0	0	0	0	22.6911	22.9204	0	27.4012	38.3408	43.327	70.9431	Inf	-1.25777	Inf	OXR1	chr8:107285002:+	chr8_106272727_+;chr8_106272773_+
chr10:94372780-94372866:mpeak_10927|chr10_94352824_94413421_KIF11_NM_+|	22.7913	5.88827	2.49054	2.36426	0.0180661	0.419847	2.52124	4.04478	75.2615	0.761146	0	0	6.7233	106.063	5.01743	25.1178	31.8301	16.1558	69.4608	6.74827	0.68837	6.0599	KIF11	-	-
chr4:76721567-76721629:mpeak_58320|chr4_76649705_76734358_USO1_NM_+|	14.0743	4.60254	2.08643	2.20594	0.0273882	0.491953	0.840412	8.9884	20.0697	0.761146	1.44682	0	9.24454	30.1111	5.01743	17.5063	48.4685	26.4368	67.3799	3.75928	-1.05839	4.81767	USO1	-	-
chr16:20749229-20749287:mpeak_29122|chr16_20748608_20753286_THUMPD1_NM_-|	30.4766	7.87484	2.94967	2.66974	0.0075911	0.268399	1.68082	0	85.2963	0	0	0	24.372	104.715	0	42.6242	60.7665	46.2644	67.3788	Inf	-0.213299	Inf	THUMPD1	-	chr16_20737952_-
chr17:35474592-35474786:mpeak_32991|chr17_35444374_35766902_ACACA_NM_-|	46.8798	5.71237	2.8483	2.00554	0.0449054	0.598026	0	0	80.2789	0	0	0	72.2755	179.319	125.436	41.863	33.2769	30.1086	63.8774	Inf	1.84088	Inf	ACACA	-	-
chr22:16154785-16154924:mpeak_49934|chr22_16151821_16193009_DUXAP8_NR_-|	10.8871	4.88362	2.20377	2.21603	0.0266893	NA	1.68082	9.43782	0	0.761146	0	0.734355	4.20206	17.078	5.01743	48.7133	20.2555	22.765	63.4205	2.89428	-1.80253	4.69681	DUXAP8	-	-
chr10:103553333-103553390:mpeak_11363|chr10_103546344_103578222_MGEA5_NM_-|	67.3349	6.81222	2.9611	2.30057	0.0214159	0.445951	0	0	100.349	0	0	0	17.6487	312.347	150.523	84.4872	83.9157	58.7484	62.6502	Inf	1.08094	Inf	MGEA5	-	-
chr7:76242176-76242302:mpeak_71536|chr7_76239532_76256620_POMZP3_NM_-|	29.0809	5.82883	2.52319	2.31011	0.0208822	0.445951	0	21.5722	0	0.761146	0.723411	0	31.9357	37.7513	0	114.933	77.405	63.8889	61.9116	3.86107	-1.87846	5.73953	POMZP3	-	-
chr14:78203309-78203366:mpeak_24628|chr14_78184629_78227497_SNW1_NM_-|	36.0519	7.11172	2.97266	2.39237	0.0167398	0.409686	0	2.2471	125.436	0	0	0	34.4569	174.824	0	19.7898	33.2769	42.5926	61.0102	Inf	1.12947	Inf	SNW1	-	chr14_77737008_-
chr3:71048835-71048951:mpeak_53519|chr3_71008542_71633140_FOXP1_NM_-|	174.235	9.02987	2.97304	3.03725	0.00238747	0.16189	0	0	160.558	0	0	0	241.198	52.1327	526.83	312.07	353.748	444.285	58.7291	Inf	-0.436713	Inf	FOXP1	-	-
chr10:13371695-13371744:mpeak_9082|chr10_13361356_13390298_SEPHS1_NM_-|	138.07	8.92129	2.88578	3.09146	0.00199173	0.14715	0	0	80.2789	0	0	0	312.633	87.1875	40.1394	327.293	433.323	375.99	54.7405	Inf	-1.36929	Inf	SEPHS1	-	-
chr3:71591445-71591516:mpeak_53526|chr3_71008542_71633140_FOXP1_NM_-|	172.981	8.8845	2.96114	3.00036	0.00269657	0.165679	0	0	145.505	0	0	0	241.198	52.1327	526.83	312.07	353.748	444.285	53.2232	Inf	-0.436713	Inf	FOXP1	-	-
chrX:76875881-76876008:mpeak_81658|chrX_76764107_77041755_ATRX_NM_-|	65.9481	5.89505	2.88368	2.04428	0.0409255	0.588412	0	0	75.2615	0	0.723411	0	13.4466	57.5257	361.255	78.398	104.895	99.8723	52.2374	6.70095	0.610148	6.0908	ATRX	-	-
chr1:36759615-36759849:mpeak_1865|chr1_36690016_36769396_THRAP3_NM_+|	166.534	6.77435	2.87005	2.36036	0.0182572	0.420339	0	0	215.749	0.761146	0	0	350.452	246.282	667.318	122.544	179.406	215.9	51.2043	8.14697	1.28745	6.85952	THRAP3	-	-
chr7:100485072-100485146:mpeak_72233|chr7_100472700_100486094_SRRT_NM_+|	70.7396	7.44254	3.21446	2.31533	0.0205947	0.445951	0	0	105.366	0	0	0	240.358	198.644	0	68.5031	127.32	108.685	48.0026	Inf	0.527746	Inf	SRRT	-	-
chr7:132558582-132558672:mpeak_73053|chr7_132470421_132766828_CHCHD3_NM_-|	25.2237	4.63695	2.34662	1.97601	0.0481534	0.613018	0.840412	45.3914	0	0	0	1.46871	68.0734	42.2455	35.122	24.3567	48.4685	36.7178	47.681	4.97626	0.408936	4.56733	CHCHD3	chr7:132558585:-	-
chr9:128232804-128232863:mpeak_79508|chr9_128201291_128469513_MAPKAP1_NM_-|	140.627	8.71859	2.85064	3.05847	0.00222473	0.155105	0	0	75.2615	0	0	0	163.04	46.2903	265.924	303.697	448.515	384.802	47.5081	Inf	-1.25848	Inf	MAPKAP1	-	-
chr11:62303946-62304098:mpeak_13815|chr11_62201363_62314332_AHNAK_NM_-|	20.5197	6.98305	2.65782	2.62736	0.00860506	0.274583	0	6.7413	0	0	0	0	23.5315	7.64014	0	60.8916	60.0431	87.3883	43.2527	Inf	-2.74051	Inf	AHNAK	-	-
chr8:96062010-96062062:mpeak_75686|chr8_96037213_96070036_NDUFAF6_NM_+|	27.9328	6.37724	2.57309	2.47843	0.0131961	0.355897	12.6062	0	0	0	0	0	63.8713	13.932	15.0523	57.8471	94.0434	77.8417	40.7283	Inf	-1.30689	Inf	NDUFAF6	-	-
chr12:890370-890422:mpeak_16287|chr12_862088_1017640_WNK1_NM_+|	553.937	20.9108	3.16566	6.60553	3.96106e-11	8.52488e-09	0	0	677.353	0	0	0	326.92	626.491	4284.89	251.178	232.938	247.478	38.7924	Inf	2.83998	Inf	WNK1	-	-
chr8:116507475-116507531:mpeak_76183|chr8_116427312_116681255_TRPS1_NM_-|	351.331	9.88821	2.88714	3.42492	0.000614979	0.0677778	0	0	110.383	0	0	0	526.098	106.962	255.889	917.942	1105.37	1193.33	37.2519	Inf	-1.85538	Inf	TRPS1	-	-
chr10:126826167-126826228:mpeak_12002|chr10_126678267_126849624_CTBP2_NM_-|	210.539	8.41601	2.88214	2.92005	0.0034997	0.185316	0	0	135.471	0	0	0	261.368	439.982	461.604	363.066	442.727	422.254	34.9465	Inf	-0.0785732	Inf	CTBP2	-	-
chr22:38885124-38885363:mpeak_50836|chr22_38882445_38902345_DDX17_NM_-|	171.069	7.85493	2.89788	2.71058	0.00671653	0.254524	0	1.34826	291.011	0	0	0	309.272	991.87	25.0872	136.245	155.533	142.465	33.0666	Inf	1.61075	Inf	DDX17	-	chr22_38489185_-
chr20:2447780-2447832:mpeak_46939|chr20_2442585_2451499_SNRPB_NM_-mpeak_46939|chr20_2442585_2451499_SNRPB_NM_-||	695.035	22.9676	3.2413	7.08591	1.38133e-12	6.83758e-10	0	0	416.447	0	0	0	1350.54	2514.05	10.0349	1150.09	1552.44	1346.81	32.2441	Inf	-0.0636267	Inf	SNRPB	-	-
chr6:86346927-86346980:mpeak_67708|chr6_86322641_86353043_SYNCRIP_NM_-|	613.928	21.3486	3.14881	6.77988	1.20276e-11	2.83507e-09	0	0	587.039	0	0	0	374.824	667.389	4495.62	315.875	509.281	417.114	31.8016	Inf	2.15634	Inf	SYNCRIP	-	-
chr8:62573738-62573788:mpeak_75045|chr8_62416068_62627199_ASPH_NM_-|	21.1321	5.82231	2.85583	2.03875	0.0414754	0.588412	15.1274	0	0	0	0	0	27.7336	69.6601	0	25.879	55.7026	59.4828	31.0645	Inf	-0.534453	Inf	ASPH	chr8:62573735:-	chr8_61661179_-
chr3:127524025-127524078:mpeak_54618|chr3_127411166_127542093_MGLL_NM_-|	87.4841	7.47887	3.17555	2.35514	0.0185158	0.422364	0	0	75.2615	0	0	0	199.178	286.28	0	204.748	136.001	148.34	31.0064	Inf	-0.0107504	Inf	MGLL	-	-
chr5:41794094-41794155:mpeak_61166|chr5_41731872_41870791_OXCT1_NM_-|	24.9584	6.73076	2.46501	2.73052	0.00632337	0.246462	10.0849	2.69652	50.1743	0	0	0	71.435	64.267	0	28.1624	49.9153	22.765	30.9284	Inf	0.428336	Inf	OXCT1	-	-
chr9:127092544-127092604:mpeak_79421|chr9_127019884_127113115_NEK6_NM_+|	127.659	8.60735	2.86551	3.00378	0.00266652	0.165679	0	0.89884	120.418	0	0	0	184.05	409.871	5.01743	213.121	289.364	309.164	30.383	Inf	-0.438447	Inf	NEK6	-	-
chr21:44522038-44522190:mpeak_49665|chr21_44513359_44527688_U2AF1_NM_-|	949.049	23.5255	3.04039	7.73766	1.01267e-14	1.6709e-11	0	0	436.516	0	0	0	1648.05	2095.65	637.214	1517.72	2598.49	2454.95	29.8922	Inf	-0.58492	Inf	U2AF1	-	-
chr8:89242349-89242402:mpeak_75510|chr8_89054023_89339717_MMP16_NM_-|	30.2672	6.08042	2.60871	2.33082	0.019763	0.437655	0	6.7413	0	0.761146	0	0	38.659	6.7413	0	92.0986	138.895	79.3104	29.6972	3.14678	-2.77291	5.91969	MMP16	-	-
chr9:131869612-131869671:mpeak_79757|chr9_131857891_131873070_CRAT_NM_-|	13.8338	5.11	2.43973	2.09449	0.0362161	0.560797	3.36165	12.1343	0	0.761146	0	0	47.0631	9.88724	0	40.3407	27.4896	24.9681	27.2097	4.34758	-0.704396	5.05197	CRAT	chr9:131869613:-;chr9:131869670:-	chr9_129107334_-
chr6:44108762-44108813:mpeak_66936|chr6_44095375_44122428_TMEM63B_NM_+|	78.8768	7.36388	2.59574	2.8369	0.00455532	0.210737	0.840412	1.79768	85.2963	0	0	0.734355	270.613	57.5257	5.01743	75.3534	248.13	201.213	26.3944	6.90381	-0.655286	7.55909	TMEM63B	-	-
chr2:99198536-99198593:mpeak_43075|chr2_99061320_99203938_INPP4A_NM_+|	9.11725	5.15989	2.56091	2.01487	0.0439183	NA	5.04247	5.39304	0	0	0	0	5.88289	37.3019	0	23.5955	7.95752	24.2337	24.1648	Inf	-0.369401	Inf	INPP4A	chr2:99198595:+	chr2_98582130_+
chr16:84096905-84096970:mpeak_30921|chr16_84088250_84150548_MBTPS1_NM_-|	183.566	7.71417	2.80892	2.74631	0.00602695	0.246462	0	0	80.2789	0	0	0	311.793	293.471	396.377	381.334	434.046	305.492	24.0442	Inf	-0.162256	Inf	MBTPS1	chr16:84096882:-	-
chr11:14639769-14639821:mpeak_12792|chr11_14526794_14665180_PSMA1_NM_-|	217.795	7.78826	2.84863	2.73403	0.00625637	0.246462	0	0	100.349	0	0	0	503.407	310.549	486.691	256.506	540.388	415.645	23.1459	Inf	0.101198	Inf	PSMA1	-	-
chr6:170668025-170668088:mpeak_69567|chr6_170599790_170713850_FAM120B_NM_+|	18.9756	4.37004	2.19432	1.99152	0.0464235	0.606323	4.20206	12.1343	0	0	0.723411	0	45.3823	55.7281	10.0349	24.3567	32.5535	42.5926	22.0474	4.49713	0.159637	4.33749	FAM120B	chr6:170668085:+	chr6_170358974_+;chr6_170358996_+
chr11:14642041-14642096:mpeak_12793|chr11_14526794_14665180_PSMA1_NM_-|	216.122	7.45108	2.81824	2.64387	0.00819633	0.274134	0	0	80.2789	0	0	0	503.407	310.549	486.691	256.506	540.388	415.645	18.5167	Inf	0.101198	Inf	PSMA1	-	-
chr18:12479541-12479621:mpeak_35960|chr18_12449895_12657912_SPIRE1_NM_-|	31.9801	5.15094	2.4392	2.11173	0.0347093	0.550873	0	9.43782	0	0	0	0	62.1905	75.5025	25.0872	44.9076	101.278	65.3576	17.3937	Inf	-0.378024	Inf	SPIRE1	-	-
chr12:76449799-76449962:mpeak_18922|chr12_76442244_76478813_NAP1L1_NM_-|	454.046	5.54364	2.10586	2.63248	0.0084764	0.274237	12.6062	1.79768	285.994	4.56687	2.17023	5.14049	1308.52	435.488	40.1394	852.483	1317.33	1182.31	16.837	4.66056	-0.90984	5.5704	NAP1L1	chr12:76449894:-	-
chr9:128346726-128346775:mpeak_79514|chr9_128201291_128469513_MAPKAP1_NM_-|	136.715	4.93791	2.26223	2.18276	0.0290535	0.499357	0	26.0664	0	1.52229	0.723411	0	163.04	46.2903	265.924	303.697	448.515	384.802	16.4542	3.53695	-1.25848	4.79543	MAPKAP1	-	-
chr17:7588565-7588629:mpeak_31885|chr17_7573008_7590868_TP53_NM_-|	104.722	5.85187	2.51334	2.32833	0.0198947	0.437655	0	21.5722	0	0	0.723411	0	294.144	105.164	20.0697	255.745	264.768	294.476	15.4315	4.89821	-0.95853	5.85674	TP53	chr17:7588533:-;chr17:7588567:-	chr17_7685235_-
chr12:33046367-33046425:mpeak_17348|chr12_32945426_33049780_PKP2_NM_-|	15.6128	5.23689	2.48963	2.10348	0.0354239	0.556582	9.24454	2.2471	0	0	0	0	54.6268	24.2687	0	37.2961	36.1705	23.4994	14.5656	Inf	-0.297537	Inf	PKP2	chr12:33046369:-	chr12_32893435_-
chr11:31470427-31470480:mpeak_13076|chr11_31454115_31531175_IMMP1L_NM_-|	37.4393	5.33424	2.52176	2.11528	0.0344059	0.550873	0	6.7413	0	0	0	0	114.296	17.5274	15.0523	65.4585	122.98	107.216	13.7694	Inf	-1.00931	Inf	IMMP1L	chr11:31470430:-	chr11_31448880_-
chr5:179045643-179045704:mpeak_64867|chr5_179041960_179050722_HNRNPH1_NM_-mpeak_64867|chr5_179041960_179050722_HNRNPH1_NM_-||	2011.69	21.5224	3.22579	6.67198	2.52375e-11	5.67844e-09	0	0	883.068	0	0	0	1619.47	914.12	17204.8	852.483	1458.4	1208.01	13.4216	Inf	2.48781	Inf	HNRNPH1	-	-
chr6:24709000-24709057:mpeak_65648|chr6_24706490_24719403_C6orf62_NM_-|	180.666	5.31718	2.57575	2.06432	0.0389872	0.574364	1.68082	0	110.383	1.52229	0	0	229.433	233.698	857.981	239.761	239.449	254.087	12.7239	6.20194	0.849283	5.35266	C6orf62	-	-
chr11:27368951-27369008:mpeak_13003|chr11_27360582_27384795_CCDC34_NM_-|	41.5983	5.10077	2.25316	2.26383	0.0235847	0.459622	8.40412	3.14594	0	0.761146	0.723411	0	21.0103	76.4014	0	84.4872	179.406	124.84	11.857	2.9598	-1.99661	4.95641	CCDC34	chr11:27368959:-	chr11_27347407_-
chr10:71138599-71138681:mpeak_10246|chr10_71029755_71160746_HK1_NM_+|	226.916	7.35276	3.22219	2.28192	0.0224943	0.455362	0	0	75.2615	0	0	0	677.372	701.544	0	379.812	505.664	383.333	10.916	Inf	0.12006	Inf	HK1	-	-
chr15:63353944-63354000:mpeak_26837|chr15_63334837_63363288_TPM1_NM_+|	212.042	7.55098	2.64655	2.85314	0.00432891	0.20804	0	0.89884	90.3137	0	0	0	337.846	215.272	752.615	379.812	462.26	305.492	10.4783	Inf	0.186286	Inf	TPM1	-	chr15_63061755_+
chr6:170108848-170108898:mpeak_69557|chr6_170104184_170124106_PHF10_NM_-|	30.618	4.56738	2.15822	2.11627	0.0343219	0.550873	6.7233	4.04478	5.01743	0.761146	0	0.734355	79.8392	26.5158	0	41.863	99.1073	102.81	9.89486	3.3999	-1.19669	4.59659	PHF10	-	-
chr19:54681976-54682110:mpeak_40034|chr19_54678125_54693733_MBOAT7_NM_-|	94.0386	5.52072	2.61336	2.1125	0.0346435	0.550873	0	17.9768	0	0	0	0	374.824	181.116	15.0523	202.465	196.768	140.262	9.44503	Inf	0.0818637	Inf	MBOAT7	chr19:54681977:-;chr19:54682042:-	chr19_54178261_-;chr19_54178326_-
chr12:52637488-52637676:mpeak_17926|chr12_52626953_52642374_KRT7_NM_+|	150.307	6.25578	3.04564	2.05401	0.0399747	0.581985	0	48.5373	0	0	0	0	236.156	845.359	0	259.551	200.385	213.697	8.97581	Inf	0.683019	Inf	KRT7	chr12:52637554:+;chr12:52637595:+;chr12:52637666:+	chr12_52243717_+;chr12_52243769_+;chr12_52243783_+;chr12_52243881_+
chr1:164669038-164669274:mpeak_6086|chr1_164528596_164815820_PBX1_NM_+|	665.321	6.77574	3.25421	2.08215	0.037329	0.563496	0	0	175.61	0	0	0	670.649	4.94362	5529.21	611.2	525.196	467.05	8.49069	Inf	1.95221	Inf	PBX1	-	-
chr1:151186234-151186375:mpeak_5283|chr1_151171020_151220338_PIP5K1A_NM_+|	95.063	5.91402	2.40868	2.4553	0.0140767	0.368677	0	8.53898	5.01743	0.761146	0	0	70.5946	171.229	5.01743	175.825	371.11	332.663	8.23794	4.15466	-1.83326	5.98792	PIP5K1A	-	-
chr1:160264303-160264388:mpeak_5924|chr1_160260006_160313354_COPA_NM_-|	251.804	5.32274	2.27812	2.33646	0.0194673	0.434069	6.7233	1.79768	130.453	1.52229	0.723411	0	644.596	1057.04	25.0872	394.273	429.706	329.726	8.04845	5.95151	0.581759	5.36975	COPA	-	-
chr12:54662292-54662358:mpeak_18123|chr12_54635689_54673915_CBX5_NM_-|	905.651	8.52455	2.95979	2.88012	0.0039752	0.19876	0	0	125.436	0	0	0	1506.86	189.655	3120.84	2173.83	1885.93	1865.26	7.81149	Inf	-0.29858	Inf	CBX5	-	-
chr3:40503092-40503152:mpeak_52428|chr3_40498782_40503429_RPL14_NM_+|	635.191	4.22953	2.14332	1.97336	0.0484548	0.613018	17.6487	1.79768	200.697	8.3726	1.44682	7.34355	1716.12	1229.16	15.0523	1399.75	1401.97	1622.93	7.43643	3.68107	-0.579799	4.26087	RPL14	-	-
chr9:114213711-114213970:mpeak_78991|chr9_114124449_114247025_KIAA0368_NM_-|	122.469	5.23416	2.47629	2.11371	0.03454	0.550873	0	3.14594	45.1569	0	0	0	117.658	337.964	597.074	95.1432	125.15	148.34	6.88273	Inf	1.51383	Inf	KIAA0368	-	-
chr14:21731582-21731638:mpeak_22570|chr14_21679465_21737638_HNRNPC_NM_-mpeak_22570|chr14_21679465_21737638_HNRNPC_NM_-||	1054.68	4.99517	2.42233	2.06213	0.0391949	0.575712	6.7233	3.14594	326.133	12.9395	0.723411	0	3178.44	2102.39	45.1569	1947.01	2508.79	2524.71	6.30874	4.62014	-0.390285	5.01042	HNRNPC	-	-
chr17:38563078-38563128:mpeak_33233|chr17_38545899_38574202_TOP2A_NM_-|	74.9044	5.45803	2.60533	2.09495	0.0361757	0.560797	6.7233	0.44942	35.122	0.761146	0	0	78.9988	371.221	0	80.6814	173.619	151.277	6.26283	5.79616	0.150652	5.64551	TOP2A	-	chr17_40406870_-
chr3:128890463-128890516:mpeak_54698|chr3_128889413_128902810_CNBP_NM_-|	609.117	6.42647	2.96085	2.17048	0.0299705	0.508062	0	0	110.383	0	0	0	659.724	337.514	4425.37	627.945	586.686	561.782	6.10684	Inf	1.61002	Inf	CNBP	-	-
chr19:1638887-1638937:mpeak_37158|chr19_1611848_1652328_TCF3_NM_-|	175.068	6.15763	2.59334	2.3744	0.0175774	0.418308	14.287	0	0	0	0	0	358.856	341.559	25.0872	474.194	454.302	432.535	5.90777	Inf	-0.907648	Inf	TCF3	-	-
chr11:130034089-130034163:mpeak_16167|chr11_130029681_130079556_ST14_NM_+|	223.708	6.54373	2.90482	2.25272	0.024277	0.469418	0	15.7297	0	0	0	0	812.679	13.4826	5.01743	471.91	646.006	719.668	5.67737	Inf	-1.14458	Inf	ST14	chr11:130034161:+	chr11_130164267_+
chr2:74061125-74061187:mpeak_42445|chr2_74056042_74089329_STAMBP_NM_+|	62.1675	6.1449	2.6805	2.29244	0.02188	0.449403	0.840412	12.1343	0	0	0	0	214.305	31.01	0	110.366	201.108	176.245	5.28901	Inf	-0.991416	Inf	STAMBP	-	-
chr7:44664516-44664692:mpeak_70858|chr7_44646120_44747477_OGDH_NM_+|	174.801	5.56492	2.64712	2.10225	0.0355313	0.556582	0	18.4262	0	0	0	0	470.631	578.853	15.0523	322.726	377.62	314.304	5.19275	Inf	0.0692423	Inf	OGDH	chr7:44664595:+;chr7:44664677:+	chr7_44624976_+;chr7_44624995_+;chr7_44625077_+
chr15:73916280-73916408:mpeak_27286|chr15_73853389_73925753_NPTN_NM_-|	603.223	7.86353	2.73666	2.8734	0.00406076	0.199018	0	0.44942	130.453	0	0	0	1143.8	638.626	2282.93	865.423	1140.82	1036.18	4.82993	Inf	0.418165	Inf	NPTN	-	-
chr1:27814601-27814757:mpeak_1364|chr1_27734840_27816698_WASF2_NM_-|	111.762	5.14907	2.48314	2.07361	0.0381153	0.567806	0	4.94362	20.0697	0	0	0	200.859	568.966	20.0697	156.035	188.81	181.386	4.75001	Inf	0.585963	Inf	WASF2	-	-
chr17:30778281-30778353:mpeak_32828|chr17_30771480_30807506_PSMD11_NM_+|	546.709	7.75337	2.68878	2.8836	0.00393153	0.19876	0	0.44942	105.366	0	0	0	1192.55	912.322	1354.71	683.509	1271.03	1040.58	4.58794	Inf	0.207979	Inf	PSMD11	-	-
chr8:17088597-17088677:mpeak_73998|chr8_17088357_17104387_CNOT7_NM_-|	204.339	4.82958	2.38817	2.0223	0.0431456	0.593995	15.1274	0	0	0	0.723411	0	306.75	235.047	491.708	404.168	546.175	452.363	4.3911	4.38621	-0.440667	4.82687	CNOT7	chr8:17088593:-	chr8_17231088_-
chr21:33036654-33036704:mpeak_49220|chr21_33031934_33040783_SOD1_NM_+|	1083.21	7.02697	2.87439	2.44468	0.0144981	0.373779	0	0	75.2615	0	0	0.734355	2999.43	2219.68	65.2266	2249.95	3041.22	2347	4.2727	6.67929	-0.531502	7.21079	SOD1	-	-
chr6:27113442-27113494:mpeak_65811|chr6_27106460_27114637_HIST1H2BK_NM_-|	88.0308	5.90148	2.38721	2.47213	0.0134312	0.35629	2.52124	5.39304	0	0	0	0	229.433	57.0763	5.01743	267.162	294.428	195.338	4.07216	Inf	-1.37653	Inf	HIST1H2BK	-	-
chr10:101474577-101474656:mpeak_11220|chr10_101474475_101492423_COX15_NM_-|	62.2432	4.80743	2.34443	2.05057	0.0403085	0.583412	5.88289	3.59536	0	0	0	0	191.614	163.589	5.01743	116.455	141.065	119.7	3.94685	Inf	-0.0665279	Inf	COX15	chr10:101474578:-	-
chr3:15357655-15357800:mpeak_51884|chr3_15297810_15382901_SH3BP5_NM_-|	103.988	5.56828	2.81742	1.97638	0.0481121	0.613018	0	6.7413	0	0	0	0	305.07	57.0763	0	253.461	301.662	323.851	3.72297	Inf	-1.27925	Inf	SH3BP5	-	-
chr17:40561871-40561969:mpeak_33341|chr17_40557406_40575338_PTRF_NM_-|	885.628	16.6733	2.90179	5.74588	9.14434e-09	1.56084e-06	0	89.884	0	0	0	0	224.39	9286.81	536.865	183.436	150.469	155.683	2.68362	Inf	4.3592	Inf	PTRF	chr17:40561869:-;chr17:40561915:-;chr17:40561950:-	chr17_42409899_-
chr3:107798559-107798751:mpeak_54004|chr3_107766139_107809935_CD47_NM_-|	287.398	6.24676	2.28177	2.73769	0.00618725	0.246462	1.68082	21.1227	0	0	0	0	829.487	552.337	160.558	580.754	673.495	629.342	2.2177	Inf	-0.288327	Inf	CD47	chr3:107798700:-	chr3_108079854_-
chr12:76442687-76442739:mpeak_18917|chr12_76442244_76478813_NAP1L1_NM_-|	428.811	4.60696	2.27354	2.02634	0.04273	0.593995	4.20206	4.4942	0	0.761146	0	0	1308.52	435.488	40.1394	852.483	1317.33	1182.31	0.731127	3.51415	-0.90984	4.42399	NAP1L1	chr12:76442666:-	chr12_76048887_-
chr5:112233098-112233158:mpeak_62725|chr5_112214532_112258031_REEP5_NM_-|	595.8	5.87039	2.39683	2.44923	0.0143162	0.372974	2.52124	9.43782	0	0	0	0	1809.41	773.901	35.122	1316.02	1849.04	1354.15	0.685089	Inf	-0.787368	Inf	REEP5	chr5:112233107:-	chr5_112897410_-
chr7:63984953-63985012:mpeak_71105|chr7_63982878_64023505_ZNF680_NM_-|	3.16547	3.59883	2.56177	1.40483	0.160073	NA	7.56371	3.14594	0	3.04458	5.78729	7.34355	0	0	0	3.04458	1.44682	6.6092	#DIV/0!	-0.594892	-Inf	Inf	ZNF680	chr7:63984957:-	-
chr19:5562641-5562715:mpeak_37381|chr19_5561410_5568045_TINCR_NR_-|	10.0347	3.48079	2.40417	1.44782	0.147669	NA	21.8507	1.34826	0	19.7898	27.4896	27.1711	0	0	0	5.32802	12.298	5.14049	#DIV/0!	-1.68222	-Inf	Inf	TINCR	chr19:5562646:-	chr19_5562636_-
chr8:86049789-86049866:mpeak_75438|chr8_86019322_86057623_LRRCC1_NM_+|	2.1547	2.38047	2.81364	0.846045	0.397528	NA	2.52124	0.44942	0	5.32802	1.44682	5.14049	0	0	0	1.52229	6.5107	2.93742	#DIV/0!	-2.00396	-Inf	Inf	LRRCC1	-	chr8_85137598_+
chr7:20256913-20256976:mpeak_70184|chr7_20180781_20257013_MACC1_NM_-|	3.3855	1.62161	2.78478	0.582312	0.560356	NA	0	0.44942	0	3.04458	6.5107	5.14049	0	0	0	16.7452	5.06388	3.67178	#DIV/0!	-5.03119	-Inf	Inf	MACC1	-	-
chr13:52365251-52365304:mpeak_21727|chr13_52343429_52378298_DHRS12_NM_-|	3.41129	1.56225	2.6968	0.579299	0.562388	NA	1.68082	0.44942	0	11.4172	3.61705	8.07791	0	0	0	9.89489	5.06388	0.734355	#DIV/0!	-3.43956	-Inf	Inf	DHRS12	chr13:52365253:-	chr13_51791117_-
chr18:12326490-12326668:mpeak_35937|chr18_12307667_12329144_TUBB6_NM_+|	599.812	3.98861	2.13928	1.86447	0.0622564	0.687298	379.866	5762.46	10.0349	288.474	376.897	285.664	10.0849	15.7297	0	13.7006	16.6384	38.1865	15888.6	2.69357	-1.40845	4.10202	TUBB6	chr18:12326511:+;chr18:12326568:+;chr18:12326615:+	chr18_12326568_+;chr18_12326602_+
chr11:68522345-68522460:mpeak_14452|chr11_68522319_68609399_CPT1A_NM_-|	297.257	0.756693	2.24423	0.337173	0.735987	0.999521	1456.43	134.377	5.01743	569.337	821.071	550.032	8.40412	0.89884	0	10.656	10.1278	0.734355	11436	-0.282078	-1.20979	0.927713	CPT1A	chr11:68522354:-;chr11:68522403:-;chr11:68522436:-	chr11_68754887_-;chr11_68754940_-
chr15:101812384-101812560:mpeak_28108|chr15_101811850_101817725_VIMP_NM_-|	245.39	1.62289	1.76422	0.919891	0.35763	0.999521	390.792	164.488	1495.19	136.245	415.238	304.757	2.52124	12.5838	0	6.08916	7.95752	8.81226	9049.87	1.25987	-0.597733	1.8576	VIMP	chr15:101812400:-;chr15:101812452:-;chr15:101812483:-	chr15_101272179_-;chr15_101272256_-;chr15_101272292_-;chr15_101272373_-
chr7:11076582-11076671:mpeak_70052|chr7_11013498_11209042_PHF14_NR_+mpeak_70052|chr7_11013498_11142112_PHF14_NM_+||	157.272	0.743649	2.71202	0.274205	NA	NA	21.0103	44.0432	1715.96	31.9681	30.3833	35.9834	0	7.19072	0	0	0.723411	0	8256.08	4.17885	3.31325	0.865605	PHF14	-	chr7_11037004_+
chr20:43127308-43127747:mpeak_48077|chr20_43124996_43150726_SERINC3_NM_-|	79.9459	0.158844	2.08869	0.0760493	0.93938	0.999521	226.071	93.9288	0	302.936	143.959	175.511	0.840412	3.59536	0	2.28344	3.61705	6.6092	7214.07	-0.959785	-1.49579	0.536004	SERINC3	-	chr20_44498704_-;chr20_44498901_-;chr20_44498947_-;chr20_44499102_-
chr20:8705336-8705404:mpeak_47162|chr20_8112911_8862268_PLCB1_NM_+|	64.2703	4.84886	2.43888	1.98815	NA	NA	11.7658	0	647.248	35.0127	13.7448	20.5619	4.20206	5.39304	0	12.9395	12.298	8.07791	6868.24	3.24898	-1.79582	5.0448	PLCB1	-	-
chr20:43141461-43141640:mpeak_48085|chr20_43124996_43150726_SERINC3_NM_-|	62.3746	0.447531	2.05849	0.217408	0.827891	0.999521	160.519	121.793	0	208.554	109.235	131.45	0.840412	3.59536	0	2.28344	3.61705	6.6092	6364.43	-0.670194	-1.49579	0.825595	SERINC3	-	chr20_44512810_-;chr20_44512978_-
chr3:23962172-23962467:mpeak_52040|chr3_23958294_23963088_RPL15_NM_+|	159.01	-0.261329	2.08279	-0.12547	0.900151	0.999521	600.054	132.579	5.01743	348.605	408.727	389.943	7.56371	1.79768	0	0.761146	9.40434	3.67178	5253.14	-0.637201	-0.563764	-0.073437	RPL15	chr3:23962338:+;chr3:23962425:+;chr3:23962464:+	chr3_23920683_+;chr3_23920710_+;chr3_23920748_+;chr3_23920791_+;chr3_23920860_+;chr3_23920919_+;chr3_23920988_+
chr17:29070295-29070358:mpeak_32725|chr17_29036625_29096889_SUZ12P1_NR_+|	21.0316	7.07609	3.10181	2.28128	NA	NA	0	0	225.784	2.28344	0	0	3.36165	6.29188	0	2.28344	7.23411	5.14049	4677.76	6.62759	-0.602563	7.23016	SUZ12P1	-	-
chr15:42875538-42875604:mpeak_26092|chr15_42867856_43011670_STARD9_NM_+|	23.1402	5.23374	6.05321	0.864623	NA	NA	0	0	270.941	0	0	0	0	6.7413	0	0	0	0	4019.13	Inf	Inf	NaN	STARD9	-	chr15_42583395_+
chr10:127512148-127512296:mpeak_12020|chr10_127512103_127541693_BCCIP_NM_+|	517.807	0.115484	1.81081	0.0637747	0.94915	0.999521	636.192	1155.91	30.1046	1824.47	1341.93	1108.14	17.6487	13.4826	0	13.7006	39.0642	33.046	3902.2	-1.23008	-1.4628	0.232713	BCCIP	chr10:127512292:+	chr10_125823632_+
chr20:43126055-43126340:mpeak_48073|chr20_43124996_43150726_SERINC3_NM_-|	33.1919	0.850345	2.07121	0.410555	0.681399	0.999521	136.987	35.5042	0	47.9522	91.1498	69.7637	0.840412	3.59536	0	2.28344	3.61705	6.6092	3888.64	-0.276051	-1.49579	1.21974	SERINC3	chr20:43126082:-;chr20:43126107:-;chr20:43126155:-	chr20_44497394_-;chr20_44497445_-;chr20_44497537_-
chr20:43127839-43127931:mpeak_48078|chr20_43124996_43150726_SERINC3_NM_-|	46.963	0.847386	1.90664	0.44444	0.656725	0.999521	114.296	129.882	5.01743	116.455	76.6815	104.278	0.840412	3.59536	0	2.28344	3.61705	6.6092	3745.25	-0.255199	-1.49579	1.24059	SERINC3	chr20:43127846:-;chr20:43127874:-	-
chr4:109546303-109546424:mpeak_59087|chr4_109541721_109551176_RPL34_NM_+|	1317.72	0.526001	1.88721	0.278719	0.78046	0.999521	4172.65	1818.8	100.349	2692.93	3342.88	3322.22	84.0412	26.9652	0	75.3534	82.4688	93.9975	3658.53	-0.619338	-1.18175	0.56241	RPL34	chr4:109546353:+;chr4:109546382:+;chr4:109546412:+;chr4:109546452:+	chr4_108625259_+;chr4_108625316_+
chr19:5256061-5256123:mpeak_37375|chr19_5206853_5340814_PTPRS_NM_-|	475.314	26.5608	5.14816	5.15928	NA	NA	0	0	5117.78	0	0	0	121.019	170.78	0	96.6655	98.3839	99.138	3507.74	Inf	-0.0117605	Inf	PTPRS	-	-
chr12:12351821-12351890:mpeak_16779|chr12_12274354_12419811_LRP6_NM_-|	1440.33	2.81742	2.53428	1.11173	NA	NA	10.9254	11.6849	16627.8	19.7898	43.4046	45.53	4.20206	56.1775	441.534	9.13375	7.95752	5.87484	3317.38	7.25873	4.44986	2.80887	LRP6	chr12:12351826:-	-
chrX:48760883-48761043:mpeak_81032|chrX_48760742_48769235_SLC35A2_NM_-|	103.072	-1.65712	1.93197	-0.857736	0.391038	0.999521	162.2	131.68	456.586	105.038	217.023	144.668	2.52124	13.4826	0	0	0.723411	2.93742	3126.19	0.6852	2.12817	-1.44297	SLC35A2	chrX:48760890:-;chrX:48760923:-;chrX:48760992:-	chrX_48903614_-
chr15:64380955-64381055:mpeak_26901|chr15_64365227_64386207_FAM96A_NR_-mpeak_26901|chr15_64367736_64386207_FAM96A_NM_-||	27.5801	2.7696	1.95862	1.41406	0.157345	0.923914	57.148	8.9884	75.2615	76.1146	42.6812	49.9362	1.68082	0	0	3.80573	5.06388	10.281	2804.14	-0.254973	-3.51015	3.25517	FAM96A	-	chr15_64088795_-
chr3:37317660-37317981:mpeak_52322|chr3_37284681_37407570_GOLGA4_NM_+|	315.066	-0.155179	1.41124	-0.10996	0.912441	0.999521	560.555	226.058	847.946	793.114	624.304	602.171	15.1274	24.7181	20.0697	12.9395	36.1705	17.6245	2728.12	-0.30516	-0.155511	-0.149649	GOLGA4	-	chr3_37276391_+
chr13:111953079-111953175:mpeak_22356|chr13_111767623_111955337_ARHGEF7_NM_+|	30.1793	7.05052	3.33227	2.11583	NA	NA	0	0.89884	346.203	0	0	0	2.52124	10.3367	0	0	0.723411	1.46871	2699.52	Inf	2.55225	Inf	ARHGEF7	-	-
chr13:113520499-113520562:mpeak_22370|chr13_113344642_113536129_ATP11A_NM_+|	14.8536	5.63006	3.09041	1.82179	0.0684876	0.708979	0	0	155.54	0	2.17023	0	7.56371	4.04478	0	3.80573	1.44682	3.67178	2679.77	6.1633	0.379365	5.78393	ATP11A	chr13:113520557:+	chr13_112866237_+
chr12:42835700-42835769:mpeak_17436|chr12_42719946_42840393_PPHLN1_NM_+|	91.27	-1.48265	2.0278	-0.731165	0.464679	0.999521	144.551	263.36	0	172.019	286.471	202.682	5.04247	10.7861	0	2.28344	2.17023	5.87484	2577.06	-0.69677	0.615897	-1.31267	PPHLN1	chr12:42835758:+	chr12_42441922_+;chr12_42441955_+;chr12_42442015_+
chr8:10094892-10094953:mpeak_73904|chr8_9911778_10285657_MSRA_NM_+|	272.019	4.8703	2.15177	2.26339	NA	NA	67.233	12.5838	2724.46	49.4745	83.9157	80.0447	43.7014	31.01	0	47.191	63.6602	60.9515	2502.32	3.71576	-1.20135	4.91712	MSRA	-	-
chr9:126147373-126147513:mpeak_79399|chr9_126144904_126692417_DENND1A_NM_-|	27.815	6.90718	3.01351	2.29207	NA	NA	0	262.461	0	0	0	4.40613	2.52124	18.8756	0	11.4172	27.4896	6.6092	2453.27	5.89645	-1.08897	6.98542	DENND1A	chr9:126147450:-	chr9_123385194_-
chr15:36907621-36907691:mpeak_25784|chr15_36871803_37100524_C15orf41_NM_+|	194.46	-1.98977	1.80871	-1.10011	0.271285	0.999521	313.474	310.999	346.203	345.56	525.196	455.3	5.04247	21.5722	0	0.761146	8.68093	0.734355	2431.43	-0.450082	1.38699	-1.83707	C15orf41	-	-
chr1:89575441-89575560:mpeak_3383|chr1_89573974_89591842_GBP2_NM_-|	5.70866	2.57371	2.3507	1.09487	0.273575	NA	19.3295	2.2471	0	12.9395	14.4682	8.07791	0	0.44942	0	1.52229	5.06388	4.40613	2400.49	-0.717767	-4.61229	3.89452	GBP2	-	chr1_89109824_-
chr3:134264567-134264669:mpeak_54916|chr3_134204574_134293634_CEP63_NM_+|	20.506	0.858483	2.18227	0.39339	0.694031	0.999521	13.4466	26.5158	0	74.5923	49.1919	69.7637	0.840412	0	0	0.761146	3.61705	7.34355	2377.55	-2.27598	-3.80195	1.52597	CEP63	-	-
chr2:112186862-112186964:mpeak_43542|chr2_112125152_112252692_MIR4435-2HG_NR_-|	327.319	-2.61375	2.02457	-1.29102	0.196698	0.964397	475.673	863.336	20.0697	894.346	918.008	705.715	5.04247	33.2571	0	0.761146	8.68093	2.93742	2365.7	-0.889689	1.62937	-2.51906	MIR4435-2HG	chr2:112186891:-	chr2_111429300_-
chr15:76995226-76995358:mpeak_27427|chr15_76641077_77176217_SCAPER_NM_-|	17.322	2.4137	2.68298	0.899634	0.368315	0.999521	0	2.2471	180.627	5.32802	2.89364	5.14049	1.68082	6.29188	0	0.761146	2.89364	0	2293.76	3.77463	1.12528	2.64935	SCAPER	-	-
chr17:57075556-57075785:mpeak_34278|chr17_57060282_57184266_TRIM37_NM_-|	268.046	0.921735	1.9738	0.466984	0.640512	0.999521	653	93.4793	15.0523	670.569	891.242	732.887	21.0103	1.34826	0	44.1464	60.7665	33.046	2270.66	-1.59133	-2.62534	1.03401	TRIM37	chr17:57075528:-;chr17:57075563:-;chr17:57075700:-	chr17_58998172_-;chr17_58998206_-;chr17_58998235_-;chr17_58998338_-;chr17_58998374_-
chr5:134259465-134260546:mpeak_63381|chr5_134240809_134296275_PCBD2_NM_+|	370.717	1.48854	1.92986	0.771318	0.440519	0.999521	358.016	1589.6	10.0349	1004.71	480.345	648.436	68.0734	13.4826	5.01743	76.1146	86.0859	108.685	2261.26	-0.124095	-1.64568	1.52159	PCBD2	chr5:134259688:+;chr5:134259909:+;chr5:134260287:+;chr5:134260313:+;chr5:134260393:+	chr5_134923915_+;chr5_134924050_+;chr5_134924086_+;chr5_134924228_+;chr5_134924615_+;chr5_134924743_+
chr10:112343594-112343697:mpeak_11588|chr10_112327448_112363988_SMC3_NM_+|	163.398	7.03466	2.57088	2.73629	NA	NA	0.840412	12.1343	1806.27	3.04458	9.40434	4.40613	1.68082	53.481	0	6.85031	32.5535	30.1086	2198.68	6.75402	-0.3336	7.08762	SMC3	-	chr10_110583868_+;chr10_110583924_+;chr10_110583946_+
chr5:64777136-64777197:mpeak_61549|chr5_64447772_64777704_ADAMTS6_NM_-|	34.6916	7.84638	6.0174	1.30395	0.192251	0.957386	0	0	381.325	0	0	0	0	9.88724	25.0872	0	0	0	2180.59	Inf	Inf	NaN	ADAMTS6	-	-
chr12:32446908-32447048:mpeak_17313|chr12_32260184_32530473_BICD1_NM_+|	27.12	5.75123	2.24316	2.5639	NA	NA	7.56371	2.69652	275.959	1.52229	2.17023	6.6092	7.56371	1.34826	0	7.61146	5.78729	6.6092	2141.08	4.79616	-1.16676	5.96292	BICD1	-	-
chr14:104152504-104152572:mpeak_25318|chr14_104095524_104167537_KLC1_NM_+|	511.436	1.6562	2.0894	0.792668	0.427971	0.999521	230.273	100.221	4355.13	398.079	437.664	350.287	15.1274	131.231	0	29.6847	52.0856	37.4521	2134.32	1.9821	0.295847	1.68625	KLC1	chr14:104152562:+	chr14_103686154_+;chr14_103686224_+
chr1:109618534-109618615:mpeak_3960|chr1_109607315_109618624_TAF13_NM_-|	228.047	-1.39397	1.95322	-0.713679	0.475426	0.999521	384.068	230.103	35.122	960.566	528.813	551.501	15.9678	0	5.01743	14.4618	5.06388	5.87484	2062.7	-1.65225	-0.275479	-1.37677	TAF13	-	chr1_109075916_-;chr1_109075940_-
chr7:5390913-5390991:mpeak_69838|chr7_5347943_5463177_TNRC18_NM_-mpeak_69838|chr7_5347943_5463177_TNRC18_NM_-||	113.54	0.55882	1.6636	0.335909	0.736939	0.999521	88.2433	653.457	311.081	73.8311	99.1073	66.8263	11.7658	11.2355	30.1046	0.761146	5.78729	10.281	1982.42	2.13451	1.65789	0.476627	TNRC18	chr7:5390919:-;chr7:5390944:-	chr7_5351329_-
chr13:34411579-34411648:mpeak_21251|chr13_34392205_34540223_RFC3_NM_+|	43.6446	0.511166	2.1532	0.237398	0.812348	0.999521	89.0837	74.6037	0	98.1878	115.022	127.778	4.20206	0	0	6.08916	2.89364	5.87484	1947.7	-1.05878	-1.82204	0.76326	RFC3	chr13:34411582:+;chr13:34411633:+	chr13_33837466_+;chr13_33837499_+
chr14:35252320-35252448:mpeak_23068|chr14_35222910_35344853_BAZ1A_NM_-|	53.3973	2.38581	1.9466	1.22563	0.220338	0.996959	9.24454	41.3466	421.464	25.879	52.0856	46.2644	4.20206	13.0332	0	6.85031	10.8512	9.54662	1825.93	1.92595	-0.660794	2.58675	BAZ1A	-	chr14_34783163_-
chr22:45750236-45750297:mpeak_51251|chr22_45740538_45809500_SMC1B_NM_-|	13.6733	4.11981	6.04705	0.681292	0.495687	0.999521	0	0	155.54	0	0	0	0	8.53898	0	0	0	0	1821.53	Inf	Inf	NaN	SMC1B	-	-
chr20:391294-391415:mpeak_46863|chr20_388708_410993_RBCK1_NM_+|	359.438	-1.33582	1.93783	-0.68934	0.490609	0.999521	456.344	1263.77	20.0697	975.789	924.519	571.328	48.7439	15.2803	0	7.61146	20.2555	9.54662	1812.01	-0.506228	0.775055	-1.28128	RBCK1	chr20:391355:+;chr20:391408:+	chr20_410649_+;chr20_410701_+;chr20_410763_+
chr2:73682287-73682443:mpeak_42430|chr2_73612885_73836694_ALMS1_NM_+|	53.2392	2.13954	2.34452	0.912572	NA	NA	6.7233	4.94362	566.97	20.5509	7.23411	5.14049	2.52124	18.8756	0	2.28344	2.89364	0.734355	1802.87	4.13538	1.85582	2.27956	ALMS1	-	chr2_73455235_+;chr2_73455348_+
chr10:112340684-112340784:mpeak_11585|chr10_112327448_112363988_SMC3_NM_+|	94.2971	5.37368	2.69289	1.99551	NA	NA	0	14.8309	963.347	3.04458	2.17023	23.4994	1.68082	53.481	0	6.85031	32.5535	30.1086	1773.29	5.09026	-0.3336	5.42386	SMC3	-	chr10_110580982_+
chr7:11150406-11150457:mpeak_70060|chr7_11013498_11209042_PHF14_NR_+|	22.1568	8.72989	5.72461	1.52498	0.127265	0.869603	0	0	220.767	0	0	0	0	5.39304	20.0697	0	11.5746	8.07791	1734.04	Inf	0.373677	Inf	PHF14	-	-
chr20:13740334-13740453:mpeak_47261|chr20_13695814_13765579_ESF1_NM_-|	111.657	4.39164	2.34832	1.87012	0.061467	0.685274	1.68082	39.0995	1179.1	9.13375	14.4682	16.1558	0	22.9204	25.0872	5.32802	16.6384	10.281	1694.01	4.93935	0.574077	4.36528	ESF1	-	-
chr6:167271578-167271635:mpeak_69500|chr6_166826375_167275771_RPS6KA2_NM_-|	5.23508	3.88378	2.55353	1.52095	0.128273	NA	7.56371	0	0	5.32802	9.40434	2.93742	0	0.44942	0	15.9841	9.40434	11.7497	1682.99	-1.22412	-6.36869	5.14457	RPS6KA2	chr6:167271582:-	chr6_166858095_-
chr21:37728913-37728975:mpeak_49420|chr21_37692486_37747440_MORC3_NM_+|	10.5278	4.25721	3.16682	1.34432	0.178846	NA	0	0	105.366	1.52229	0	0.734355	2.52124	10.3367	0	0	1.44682	4.40613	1638.93	5.54509	1.13542	4.40967	MORC3	-	chr21_36356633_+
chr8:66636479-66636583:mpeak_75100|chr8_66631730_66753969_PDE7A_NM_-|	26.2168	3.83752	2.18997	1.75232	NA	NA	2.52124	5.84246	265.924	6.08916	3.61705	7.34355	4.20206	7.19072	0	5.32802	4.34046	2.20307	1605.04	4.00786	-0.0593885	4.06725	PDE7A	-	chr8_65724314_-
chr7:138819397-138819501:mpeak_73218|chr7_138818489_138874066_TTC26_NM_+|	94.8913	-0.30126	1.8573	-0.162203	0.871146	0.999521	131.104	306.055	5.01743	263.356	222.811	166.699	9.24454	9.43782	0	3.80573	8.68093	12.484	1577.88	-0.562163	-0.41856	-0.143603	TTC26	-	-
chr4:140427134-140427428:mpeak_59550|chr4_140417675_140477923_SETD7_NM_-|	91.5362	1.333	2.06587	0.645251	0.518764	0.999521	147.072	25.6169	456.586	98.9489	160.597	170.37	13.4466	0	0	6.08916	7.95752	11.7497	1559.94	0.549635	-0.939927	1.48956	SETD7	chr4:140427127:-;chr4:140427192:-;chr4:140427287:-	chr4_139506026_-;chr4_139506149_-;chr4_139506207_-;chr4_139506093_-
chr17:7217812-7217950:mpeak_31825|chr17_7216158_7218658_GPS2_NM_-|	118.98	2.38778	1.79235	1.33221	0.182792	0.956857	78.9988	46.2903	727.527	160.602	164.938	107.95	25.2124	11.2355	0	35.0127	33.2769	36.7178	1559.88	0.976238	-1.52658	2.50282	GPS2	chr17:7217870:-	chr17_7314548_-
chr7:132719853-132720115:mpeak_73061|chr7_132470421_132766828_CHCHD3_NM_-|	444.187	-0.736058	1.59982	-0.460088	0.645453	0.999521	1635.44	532.563	90.3137	1516.96	523.026	776.948	68.0734	42.2455	35.122	24.3567	48.4685	36.7178	1552.74	-0.318878	0.408936	-0.727814	CHCHD3	chr7:132719967:-;chr7:132720017:-;chr7:132720106:-	chr7_133035027_-;chr7_133035267_-
chr6:30602939-30603025:mpeak_66062|chr6_30594612_30614245_ATAT1_NM_+|	29.9046	6.35687	2.29023	2.77565	NA	NA	1.68082	2.2471	296.028	3.04458	2.89364	2.93742	8.40412	4.94362	0	5.32802	15.1916	16.1558	1498.16	5.07876	-1.45822	6.53698	ATAT1	-	chr6_30635234_+
chr1:154235903-154235985:mpeak_5500|chr1_154192647_154243356_UBAP2L_NM_+|	185.007	-1.10282	1.73114	-0.637051	0.524091	0.999521	176.487	375.715	762.649	197.137	360.982	270.243	10.9254	47.6385	0	3.04458	10.1278	5.14049	1496.77	0.666567	1.67716	-1.01059	UBAP2L	chr1:154235933:+;chr1:154235980:+	chr1_154263433_+;chr1_154263502_+
chr9:26990132-26990198:mpeak_77477|chr9_26947036_27062615_IFT74_NM_+|	5.97359	5.60215	2.9679	1.88758	0.0590822	NA	0	3.59536	50.1743	0	4.34046	0	0	1.79768	0	2.28344	3.61705	5.87484	1495.53	3.63087	-2.71156	6.34243	IFT74	chr9:26990198:+	chr9_26990195_+
chr12:257793-257924:mpeak_16245|chr12_176048_283764_IQSEC3_NM_+|	9.25056	9.41096	6.05469	1.55433	NA	NA	0	103.816	0	0	0	0	0	7.19072	0	0	0	0	1443.75	Inf	Inf	NaN	IQSEC3	chr12:257846:+;chr12:257923:+	chr12_148679_+;chr12_148755_+
chr7:11022488-11022774:mpeak_70048|chr7_11013498_11209042_PHF14_NR_+mpeak_70048|chr7_11013498_11142112_PHF14_NM_+||	32.6177	-1.41812	2.41308	-0.58768	0.556747	0.999521	26.0528	83.1427	200.697	35.0127	21.7023	16.8902	0	7.19072	0	0	0.723411	0	1436.54	2.07389	3.31325	-1.23936	PHF14	-	chr7_10982943_+;chr7_10982980_+;chr7_10983007_+;chr7_10983062_+;chr7_10983092_+
chr17:57158445-57158579:mpeak_34295|chr17_57060282_57184266_TRIM37_NM_-|	83.6724	2.86724	1.98785	1.44239	0.149194	0.916228	98.3282	6.29188	371.29	152.99	117.916	96.9349	21.0103	1.34826	0	44.1464	60.7665	33.046	1419.02	0.371606	-2.62534	2.99695	TRIM37	chr17:57158457:-	-
chr14:93406063-93406271:mpeak_24915|chr14_93404871_93582263_ITPK1_NM_-|	53.4683	-0.807671	1.71036	-0.472224	0.636767	0.999521	178.167	95.7264	20.0697	109.605	107.065	106.482	8.40412	5.84246	0	1.52229	5.06388	3.67178	1375.6	-0.136572	0.473874	-0.610447	ITPK1	chr14:93406062:-;chr14:93406109:-;chr14:93406207:-	chr14_92939754_-;chr14_92939863_-;chr14_92939906_-
chr8:133851622-133851735:mpeak_76646|chr8_133787603_133858025_PHF20L1_NM_+|	25.3345	6.01712	3.1607	1.90373	NA	NA	0	0	250.872	0	0	1.46871	5.04247	31.9088	0	3.80573	6.5107	4.40613	1357.85	7.41625	1.3276	6.08866	PHF20L1	-	-
chr15:101815449-101815570:mpeak_28110|chr15_101811850_101817725_VIMP_NM_-|	75.9425	-0.574895	1.77345	-0.324167	0.745811	0.999521	126.902	159.544	10.0349	175.825	237.279	163.761	2.52124	12.5838	0	6.08916	7.95752	8.81226	1308.53	-0.960292	-0.597733	-0.362559	VIMP	-	chr15_101275305_-
chr10:112357892-112358028:mpeak_11593|chr10_112327448_112363988_SMC3_NM_+|	97.7669	7.42249	2.47502	2.99896	NA	NA	5.88289	6.7413	1028.57	1.52229	4.34046	1.46871	1.68082	53.481	0	6.85031	32.5535	30.1086	1258.36	7.14993	-0.3336	7.48353	SMC3	-	chr10_110598195_+
chr2:71297667-71297730:mpeak_42357|chr2_71295407_71305447_NAGK_NM_+|	96.0395	24.6919	3.36347	7.3412	NA	NA	0	0	797.771	0	0	0	63.0309	65.1659	0	62.4139	75.2347	88.857	1244.6	Inf	-0.821187	Inf	NAGK	-	-
chr3:143236900-143236983:mpeak_55225|chr3_142985771_143567373_SLC9A9_NM_-|	45.5611	-4.56881	2.51653	-1.81552	0.0694443	0.713173	115.136	122.242	10.0349	140.051	62.9367	89.5913	0	6.7413	0	0	0	0	1223.37	-0.241901	Inf	-Inf	SLC9A9	-	-
chr1:113992579-113992974:mpeak_4230|chr1_113933474_114224833_MAGI3_NM_+|	242.174	2.09164	2.05471	1.01797	0.308692	0.999521	92.4454	20.6733	2323.07	64.6974	56.426	77.1073	10.0849	17.078	175.61	26.6401	22.4257	19.8276	1201.44	3.61937	1.55743	2.06195	MAGI3	-	-
chr19:2233146-2233206:mpeak_37192|chr19_2230611_2236352_PLEKHJ1_NM_-|	54.5622	-2.86342	2.13244	-1.34279	0.179341	0.956857	81.52	204.037	0	105.038	146.129	77.1073	7.56371	3.14594	25.0872	0	1.44682	3.67178	1196.57	-0.201125	2.80601	-3.00714	PLEKHJ1	chr19:2233152:-	chr19_2233154_-
chr22:26043491-26043723:mpeak_50365|chr22_25960860_26118255_ADRBK2_NM_+|	40.9336	0.483727	1.73744	0.278414	0.780695	0.999521	41.1802	21.1227	220.767	63.9362	55.7026	44.0613	7.56371	11.2355	5.01743	6.85031	12.298	1.46871	1188.54	0.790102	0.208135	0.581967	ADRBK2	-	chr22_25647672_+;chr22_25647745_+
chr5:134260768-134262035:mpeak_63383|chr5_134240809_134296275_PCBD2_NM_+|	182.25	1.95013	1.90078	1.02596	0.30491	0.999521	154.636	856.145	10.0349	433.092	169.278	206.354	68.0734	13.4826	5.01743	76.1146	86.0859	108.685	1179.13	0.336003	-1.64568	1.98169	PCBD2	chr5:134261123:+;chr5:134261174:+;chr5:134261397:+;chr5:134261424:+;chr5:134261644:+;chr5:134261675:+	chr5_134925185_+;chr5_134925704_+;chr5_134925984_+;chr5_134926012_+
chr17:57165647-57165941:mpeak_34300|chr17_57060282_57184266_TRIM37_NM_-|	164.638	0.65361	1.91105	0.342017	0.732338	0.999521	332.803	39.549	20.0697	576.187	387.025	459.706	21.0103	1.34826	0	44.1464	60.7665	33.046	1170.09	-1.85838	-2.62534	0.766964	TRIM37	-	-
chr6:100994495-100994550:mpeak_68022|chr6_100957409_101329248_ASCC3_NM_-|	53.6456	6.47708	2.33256	2.77681	NA	NA	8.40412	2.2471	566.97	0.761146	2.89364	1.46871	15.9678	17.078	0	4.56687	7.23411	16.1558	1165.29	6.81685	0.241267	6.57558	ASCC3	-	-
chr5:58883068-58883134:mpeak_61446|chr5_58270907_59783925_PDE4D_NM_-|	373.046	17.9172	6.00717	2.98264	NA	NA	0.840412	0	4114.29	0	0	0	0	9.43782	351.22	0.761146	0	0	1141.01	Inf	8.88824	Inf	PDE4D	-	-
chr8:133825381-133825446:mpeak_76642|chr8_133787603_133858025_PHF20L1_NM_+|	40.5366	2.76351	2.63895	1.0472	NA	NA	0	0.44942	411.429	5.32802	4.34046	13.2184	5.04247	31.9088	0	3.80573	6.5107	4.40613	1114.65	4.16963	1.3276	2.84203	PHF20L1	chr8:133825435:+	chr8_132813188_+
chr5:169010833-169010904:mpeak_64458|chr5_169010637_169031063_SPDL1_NM_+|	198.943	-0.554064	2.19655	-0.252242	0.800854	0.999521	57.148	908.278	10.0349	415.586	443.451	436.207	1.68082	58.4246	0	8.3726	22.4257	25.7024	1081.94	-0.409068	0.0892244	-0.498292	SPDL1	-	chr5_169583889_+
chr7:120496561-120496620:mpeak_72732|chr7_120428951_120498177_TSPAN12_NM_-|	10.1203	4.31775	6.04179	0.714648	0.474827	NA	0	0	110.383	0	0	0	0	10.3367	0	0	0.723411	0	1067.88	Inf	3.83681	Inf	TSPAN12	-	-
chr3:37317343-37317528:mpeak_52321|chr3_37284681_37407570_GOLGA4_NM_+|	99.2631	0.700321	1.58911	0.440701	0.659429	0.999521	110.094	37.7513	486.691	152.229	135.278	142.465	15.1274	24.7181	20.0697	12.9395	36.1705	17.6245	1059.06	0.56146	-0.155511	0.716971	GOLGA4	-	chr3_37275941_+
chr20:8769105-8769177:mpeak_47164|chr20_8112911_8862268_PLCB1_NM_+|	18.1193	3.87356	1.98451	1.9519	0.0509501	0.630507	5.04247	5.84246	135.471	11.4172	9.40434	7.34355	4.20206	5.39304	0	12.9395	12.298	8.07791	1016.88	2.3775	-1.79582	4.17332	PLCB1	-	-
chr2:191799958-191800025:mpeak_45368|chr2_191745546_191827555_GLS_NM_+|	303.716	0.411976	1.83126	0.224968	0.822004	0.999521	257.166	341.11	2328.09	101.994	167.108	104.278	24.372	10.3367	260.906	10.656	22.4257	16.1558	989.924	2.97039	2.58589	0.384506	GLS	chr2:191799979:+;chr2:191800015:+	chr2_190935288_+
chr1:52719391-52719501:mpeak_2578|chr1_52607765_52811731_ZFYVE9_NM_+|	13.278	5.1927	6.05123	0.858122	0.390825	0.999521	0	0.44942	150.523	0	0	0	0	7.64014	0	0	0.723411	0	988.021	Inf	3.40071	Inf	ZFYVE9	-	-
chr3:160665425-160665584:mpeak_55690|chr3_160473995_160786598_PPM1L_NM_+|	116.979	-3.84495	2.24821	-1.71022	0.0872243	0.754826	264.73	7.19072	0	471.91	292.981	331.194	23.5315	4.04478	0	3.80573	2.89364	1.46871	986.065	-2.0111	1.75536	-3.76646	PPM1L	-	chr3_160947688_+;chr3_160947784_+;chr3_160947824_+
chr9:88916225-88916519:mpeak_78322|chr9_88903659_88969402_ZCCHC6_NM_-|	17.6231	-2.15662	2.54608	-0.847037	0.396974	0.999521	5.04247	32.3582	135.471	14.4618	6.5107	5.87484	0	6.7413	5.01743	0	0	0	980.102	2.68685	Inf	-Inf	ZCCHC6	chr9:88916208:-	chr9_86301532_-
chr6:44371543-44371772:mpeak_66967|chr6_44355250_44414343_CDC5L_NM_+|	70.7605	2.52555	1.93006	1.30853	0.190692	0.957386	23.5315	64.267	612.126	33.4904	23.1491	13.9527	19.3295	29.2123	0	3.80573	11.5746	14.6871	961.268	3.30962	0.691027	2.61859	CDC5L	-	chr6_44403880_+;chr6_44403988_+;chr6_44404021_+
chr19:36815804-36815926:mpeak_38854|chr19_36804224_36822620_LINC00665_NR_-|	28.5336	0.324128	1.94638	0.166528	0.867741	0.999521	48.7439	99.7712	0	55.5636	60.7665	39.6552	10.0849	5.39304	0	13.7006	5.78729	2.93742	959.525	-0.0708003	-0.534911	0.464111	LINC00665	chr19:36815809:-	chr19_36324910_-;chr19_36324946_-;chr19_36324959_-;chr19_36325017_-
chr18:72509810-72509865:mpeak_36946|chr18_72342918_72775105_ZNF407_NM_+|	13.4005	6.64157	5.23992	1.26749	0.204979	0.977499	0	0	125.436	0	0	0	12.6062	13.932	0	3.04458	5.78729	0	945.322	Inf	1.58728	Inf	ZNF407	-	-
chr12:2077015-2077085:mpeak_16345|chr12_2055452_2113677_DCP1B_NM_-|	15.5225	8.28773	5.37652	1.54147	0.123203	0.860437	0	0	155.54	0	0	0	0	16.6285	0	6.08916	4.34046	3.67178	935.382	Inf	0.237822	Inf	DCP1B	-	-
chr1:144902571-144902836:mpeak_4748|chr1_144852499_145076186_PDE4DIP_NM_-|	28.3211	-1.87523	1.9085	-0.982563	0.325823	0.999521	38.659	117.748	10.0349	38.8184	58.5963	53.6079	2.52124	10.3367	5.01743	3.04458	0	1.46871	931.126	0.140253	1.98572	-1.84546	PDE4DIP	chr1:144902657:-;chr1:144902698:-	chr1_148981742_+;chr1_148981774_+;chr1_148981834_+
chr12:122240391-122240487:mpeak_20348|chr12_122233632_122241390_LINC01089_NR_-|	12.5438	3.81995	2.34933	1.62598	0.103955	NA	5.04247	2.2471	105.366	3.80573	6.5107	9.54662	0	4.04478	0	1.52229	2.89364	9.54662	928.403	2.50376	-1.78743	4.29119	LINC01089	chr12:122240368:-;chr12:122240403:-;chr12:122240430:-	chr12_121802483_-
chr17:55351784-55351947:mpeak_34160|chr17_55333930_55756909_MSI2_NM_+|	76.8648	-0.0979242	2.0616	-0.047499	0.962115	0.999521	167.242	15.2803	0	239.761	232.938	154.949	0.840412	4.04478	25.0872	16.7452	39.7876	25.7024	913.454	-1.78188	-1.45612	-0.325758	MSI2	chr17:55351850:+	chr17_57274485_+
chr12:4662165-4662360:mpeak_16441|chr12_4647949_4668022_RAD51AP1_NM_+|	51.6737	0.673814	1.91347	0.352142	0.724732	0.999521	96.6474	160.892	0	79.1591	83.9157	118.231	13.4466	14.8309	0	13.7006	26.0428	13.2184	910.76	-0.127345	-0.9053	0.777955	RAD51AP1	chr12:4662360:+	chr12_4553046_+;chr12_4553100_+;chr12_4553160_+;chr12_4553194_+
chr15:34873672-34873769:mpeak_25747|chr15_34820035_34875771_GOLGA8B_NR_-|	52.5276	8.90102	6.01747	1.4792	NA	NA	0	0.44942	597.074	0	0	0	0	32.8077	0	0	0	0	910.647	Inf	Inf	NaN	GOLGA8B	-	chr15_34581568_-
chr3:157920912-157921043:mpeak_55580|chr3_157827840_158261971_RSRC1_NM_+|	81.3165	-0.75683	1.66258	-0.455215	0.648955	0.999521	155.476	70.1095	20.0697	239.761	227.874	211.494	12.6062	5.39304	0	6.85031	18.0853	8.07791	909.874	-1.46705	-0.875121	-0.591929	RSRC1	-	chr3_158203191_+
chr10:70392322-70392456:mpeak_10172|chr10_70320116_70450564_TET1_NM_+|	4.88735	2.35581	2.25796	1.04333	0.296794	NA	10.9254	5.39304	0	12.1783	7.23411	8.07791	0	0.89884	0	1.52229	4.34046	8.07791	907.748	-0.752426	-3.95509	3.20267	TET1	-	chr10_68632758_+
chr1:54534436-54534523:mpeak_2693|chr1_54519244_54576724_TCEANC2_NR_+mpeak_2693|chr1_54519244_54561957_TCEANC2_NM_+||	16.5644	2.64733	3.17869	0.832836	0.404937	0.999521	0	2.69652	180.627	0.761146	2.89364	0	0	10.3367	0	0	0.723411	0.734355	886.766	5.64846	2.82594	2.82253	TCEANC2	-	-
chr3:27493900-27494042:mpeak_52111|chr3_27418336_27525911_SLC4A7_NM_-|	115.118	2.68315	2.06267	1.30082	NA	NA	32.7761	25.6169	1063.7	50.2356	34.0003	29.3742	21.8507	65.1659	0	24.3567	11.5746	22.765	859.674	3.30402	0.568023	2.736	SLC4A7	-	-
chr10:121190893-121190966:mpeak_11836|chr10_120967196_121214480_GRK5_NM_+|	9.94715	2.93513	2.94953	0.995116	0.31968	NA	0	0	80.2789	0	2.89364	0	5.04247	13.0332	10.0349	0.761146	1.44682	5.87484	856.749	4.79406	1.79818	2.99588	GRK5	-	-
chr12:93251203-93251264:mpeak_19190|chr12_93169909_93323107_EEA1_NM_-|	15.0696	1.75061	2.11474	0.827813	0.407776	0.999521	0	5.84246	75.2615	20.5509	21.7023	10.281	3.36165	5.84246	5.01743	6.08916	18.8087	8.07791	855.434	0.626514	-1.21333	1.83984	EEA1	-	chr12_92857434_-
chr5:68608775-68608838:mpeak_61696|chr5_68578861_68628620_CCDC125_NM_-|	77.9708	0.90071	2.11905	0.425054	0.670797	0.999521	171.444	198.644	0	198.659	109.235	117.497	41.1802	2.2471	0	47.191	25.3194	24.2337	852.201	-0.200922	-1.15557	0.95465	CCDC125	chr5:68608783:-	chr5_69312957_-;chr5_69312990_-
chr3:9799001-9799098:mpeak_51581|chr3_9791627_9807492_OGG1_NM_+|	62.1752	0.782434	1.5351	0.509696	0.610265	0.999521	74.7967	153.252	125.436	102.755	103.448	110.153	21.8507	6.29188	0	17.5063	15.1916	15.4215	837.366	0.1601	-0.773864	0.933964	OGG1	chr3:9799091:+	chr3_9757403_+
chr16:81065033-81065098:mpeak_30844|chr16_81040102_81066174_CENPN_NM_+|	41.6052	0.94908	2.06903	0.458708	0.646444	0.999521	96.6474	23.3698	5.01743	100.471	138.171	99.8723	5.04247	0	0	17.5063	3.61705	9.54662	826.543	-1.43689	-2.60463	1.16773	CENPN	chr16:81065088:+	chr16_81031483_+
chr3:69092895-69093006:mpeak_53481|chr3_69072471_69101484_TMF1_NM_-|	10.9635	3.71669	2.04665	1.81599	0.069372	NA	6.7233	3.14594	60.2092	3.80573	10.1278	8.81226	1.68082	4.04478	0	22.0732	5.06388	5.87484	815.965	1.62337	-2.52749	4.15086	TMF1	-	-
chr11:110008097-110008147:mpeak_15433|chr11_109964086_110035065_ZC3H12C_NM_+|	7.75863	5.80319	5.97253	0.971648	0.331226	NA	0	0	80.2789	0	0	0	0	9.88724	0	0	0	2.93742	811.944	Inf	1.75102	Inf	ZC3H12C	-	-
chr3:142095284-142095407:mpeak_55164|chr3_142030655_142166904_XRN1_NM_-|	25.6778	5.93472	3.21979	1.8432	0.0652999	0.695128	0	0	225.784	1.52229	0	0	16.8082	39.9984	0	0.761146	15.915	7.34355	794.923	7.21256	1.24184	5.97072	XRN1	-	-
chr3:101056377-101056484:mpeak_53854|chr3_101044924_101232085_SENP7_NM_-|	28.875	3.96405	3.03756	1.30501	NA	NA	0	0	230.802	3.80573	0	0	5.04247	8.9884	75.2615	1.52229	14.4682	6.6092	775.437	5.92234	1.98223	3.94011	SENP7	-	chr3_101337592_-
chr6:147527164-147527217:mpeak_68961|chr6_147525493_147705849_STXBP5_NM_+|	134.477	21.548	3.2839	6.5617	NA	NA	0	0	1123.9	0	0	0	18.4891	26.9652	391.36	13.7006	23.1491	16.1558	771.888	Inf	3.0428	Inf	STXBP5	-	-
chr13:28849064-28849231:mpeak_21107|chr13_28712642_28866518_PAN3_NM_+|	91.7694	6.86466	2.47666	2.77174	NA	NA	4.20206	0.44942	918.19	0.761146	0.723411	2.20307	8.40412	21.1227	90.3137	7.61146	31.8301	15.4215	770.057	7.96725	1.12721	6.84004	PAN3	-	chr13_28274979_+;chr13_28275041_+
chr10:112343136-112343311:mpeak_11587|chr10_112327448_112363988_SMC3_NM_+|	66.069	3.8682	2.25858	1.71267	0.0867737	0.754443	4.20206	46.2903	566.97	8.3726	18.0853	24.2337	1.68082	53.481	0	6.85031	32.5535	30.1086	746.243	3.60653	-0.3336	3.94013	SMC3	-	chr10_110583396_+;chr10_110583428_+;chr10_110583516_+
chr11:10795571-10795723:mpeak_12652|chr11_10772533_10800225_CTR9_NM_+|	114.366	1.60261	2.02843	0.790073	0.429485	0.999521	36.9781	291.674	687.388	98.9489	47.0217	59.4828	5.04247	87.1875	0	5.32802	17.3619	35.9834	734.425	2.30607	0.652531	1.65354	CTR9	-	chr11_10774076_+;chr11_10774143_+
chr7:74921845-74921903:mpeak_71450|chr7_74703024_74988276_PMS2P5_NR_-|	10.1559	0.458128	2.17049	0.211072	0.832831	NA	26.8932	0.89884	0	27.4012	23.8726	22.765	3.36165	0.44942	0	4.56687	5.78729	5.87484	729.245	-1.41361	-2.09031	0.676696	PMS2P5	chr7:74921848:-	-
chr16:9205860-9205996:mpeak_28717|chr16_9185536_9210524_C16orf72_NM_+|	161.009	1.65631	1.97863	0.837102	NA	NA	50.4247	48.0879	1409.9	35.7738	45.5749	67.5607	19.3295	174.375	15.0523	8.3726	23.8726	33.7803	722.569	3.34052	1.66073	1.6798	C16orf72	chr16:9205889:+;chr16:9205915:+;chr16:9205958:+;chr16:9206000:+	chr16_9112031_+;chr16_9112122_+
chr4:4276087-4276460:mpeak_57099|chr4_4269750_4291896_LYAR_NM_-|	58.1061	0.328594	1.56646	0.209769	0.833848	0.999521	41.1802	154.151	65.2266	132.439	106.341	124.84	9.24454	15.2803	0	10.656	18.0853	19.8276	708.284	-0.480832	-0.985791	0.504958	LYAR	-	chr4_4274449_-;chr4_4274530_-;chr4_4274619_-;chr4_4274648_-;chr4_4274683_-
chr7:72514984-72515042:mpeak_71311|chr7_72476618_72519597_PMS2P5_NR_+|	10.1801	0.379861	2.07587	0.182989	0.854807	NA	24.372	2.2471	0	28.1624	26.0428	21.2963	3.36165	0.44942	0	4.56687	5.78729	5.87484	698.467	-1.50405	-2.09031	0.586261	PMS2P5	chr7:72515039:+	-
chr4:1950487-1950552:mpeak_56933|chr4_1873122_1980364_WHSC1_NM_+|	306.501	9.19558	3.00947	3.05555	NA	NA	0	0	2077.22	1.52229	2.89364	1.46871	284.059	313.695	0	196.376	414.514	386.271	695.006	8.46348	-0.738273	9.20175	WHSC1	chr4:1950546:+	chr4_1948763_+;chr4_1948818_+
chr7:82449752-82449849:mpeak_71640|chr7_82388031_82792197_PCLO_NM_-|	60.6107	1.84263	5.45092	0.33804	0.735333	0.999521	0	62.9188	571.987	0.761146	0	0	0	1.34826	90.3137	0	0	0	692.66	9.70415	Inf	-Inf	PCLO	chr7:82449793:-	chr7_82820464_-;chr7_82820522_-
chr1:155753474-155753548:mpeak_5674|chr1_155720524_155829191_GON4L_NM_-|	6.44373	1.14572	2.83586	0.404013	0.686203	NA	0	49.8856	0	6.85031	0	0.734355	2.52124	12.1343	0	2.28344	1.44682	1.46871	680.773	2.71747	1.49515	1.22231	GON4L	-	-
chr3:157839879-157840007:mpeak_55578|chr3_157827840_158261971_RSRC1_NM_+|	38.9035	0.315814	1.66711	0.189438	0.84975	0.999521	50.4247	17.5274	115.401	86.0095	75.2347	71.2325	12.6062	5.39304	0	6.85031	18.0853	8.07791	679.115	-0.342462	-0.875121	0.532659	RSRC1	-	chr3_158122121_+
chr14:35233906-35234110:mpeak_23063|chr14_35222910_35344853_BAZ1A_NM_-|	17.0904	1.8694	2.14391	0.871958	0.383231	0.999521	0	21.5722	95.3312	15.2229	10.8512	17.6245	4.20206	13.0332	0	6.85031	10.8512	9.54662	678.281	1.41966	-0.660794	2.08045	BAZ1A	-	-
chr16:53730050-53730130:mpeak_29947|chr16_53636100_53737846_RPGRIP1L_NM_-|	15.3054	-1.76887	2.71283	-0.652039	0.514376	0.999521	5.04247	12.5838	135.471	8.3726	8.68093	5.87484	0	7.64014	0	0	0	0	667.95	2.73924	Inf	-Inf	RPGRIP1L	chr16:53730050:-	-
chr17:43040080-43040156:mpeak_33614|chr17_43037735_43045644_C1QL1_NM_-|	21.0912	5.39656	5.92321	0.911089	0.362249	0.999521	0	0	190.662	0	0	0	0	12.1343	45.1569	0	0	5.14049	665.59	Inf	3.47834	Inf	C1QL1	-	-
chr3:30720328-30720390:mpeak_52141|chr3_30647993_30732911_TGFBR2_NM_+|	78.671	-3.26114	2.45888	-1.32627	0.184751	0.956857	289.942	168.982	0	124.828	172.172	149.808	0	34.6053	0	1.52229	0.723411	1.46871	663.083	0.0386002	3.21979	-3.18119	TGFBR2	-	-
chr5:108171414-108171514:mpeak_62604|chr5_108083522_108523133_FER_NM_+|	36.2878	6.15273	2.83939	2.16692	NA	NA	0	0.89884	361.255	2.28344	2.17023	2.20307	0	27.864	0	6.85031	25.3194	6.6092	649.859	5.76564	-0.476867	6.24251	FER	-	-
chr2:220426427-220426516:mpeak_46219|chr2_220415564_220436268_OBSL1_NM_-|	19.0204	-0.189915	1.97335	-0.0962396	0.92333	0.999521	86.5625	26.9652	0	38.8184	30.3833	15.4215	6.7233	10.7861	0	3.80573	2.17023	6.6092	648.382	0.42392	0.476404	-0.0524847	OBSL1	chr2:220426444:-	chr2_219561709_-;chr2_219561757_-
chr5:57754806-57754883:mpeak_61433|chr5_57750601_57755966_PLK2_NM_-|	37.6495	1.80203	2.40526	0.749203	0.453735	0.999521	12.6062	296.617	0	14.4618	16.6384	31.5773	17.6487	0	30.1046	2.28344	16.6384	13.2184	647.544	2.30263	0.571216	1.73141	PLK2	-	chr5_58459034_-
chr2:114201399-114201605:mpeak_43667|chr2_114195267_114253213_CBWD2_NM_+|	47.8668	1.06016	1.96859	0.538537	0.590207	0.999521	158.838	23.8193	0	56.3248	117.193	96.9349	19.3295	8.9884	0	26.6401	32.5535	33.7803	645.024	-0.566235	-1.71511	1.14888	CBWD2	-	-
chr20:25280825-25280924:mpeak_47473|chr20_25275666_25371618_ABHD12_NM_-|	77.7239	1.03527	1.81317	0.570975	0.568017	0.999521	153.795	146.96	5.01743	186.481	149.023	149.074	26.0528	5.84246	0	44.9076	36.894	28.6399	639.12	-0.664265	-1.79187	1.1276	ABHD12	chr20:25280850:-;chr20:25280918:-	chr20_25300214_-
chr3:140955174-140955335:mpeak_55088|chr3_140950666_141011109_PXYLP1_NM_+|	6.25365	1.0967	2.08377	0.526304	0.598677	NA	15.1274	4.04478	0	9.13375	23.8726	4.40613	1.68082	1.34826	0	3.04458	6.5107	5.87484	632.937	-0.964502	-2.3488	1.38429	PXYLP1	chr3:140955231:+;chr3:140955334:+	chr3_141236385_+;chr3_141236490_+
chr6:18249875-18250034:mpeak_65533|chr6_18225961_18264799_DEK_NM_-|	406.229	1.60134	1.71121	0.935791	0.349381	0.999521	304.229	486.722	1801.26	485.611	358.812	400.224	132.785	281.786	5.01743	159.841	227.874	230.588	617.797	1.05845	-0.559337	1.61778	DEK	-	chr6_18249714_-;chr6_18249795_-
chr2:230045483-230045748:mpeak_46381|chr2_229890824_230136057_PID1_NM_-|	18.3922	-3.85999	2.7209	-1.41864	0.156003	0.921495	15.9678	3.59536	105.366	50.2356	7.95752	30.8429	0	6.7413	0	0	0	0	617.731	0.48865	Inf	-Inf	PID1	chr2:230045491:-;chr2:230045570:-;chr2:230045635:-	chr2_229180782_-;chr2_229180936_-
chr17:29664552-29664616:mpeak_32763|chr17_29421944_29701030_NF1_NM_+|	12.9643	5.95907	3.11287	1.91433	0.0555775	0.653465	0	0	95.3312	0	0	0	7.56371	4.94362	35.122	6.08916	5.78729	0.734355	600.457	Inf	1.91719	Inf	NF1	-	-
chr1:211571645-211571739:mpeak_7464|chr1_211556096_211605660_LINC00467_NR_+|	3.5041	1.36334	2.6198	0.520398	0.602787	NA	5.04247	0	0	5.32802	11.5746	5.14049	0.840412	0	0	6.08916	2.89364	5.14049	600	-2.12812	-4.07084	1.94271	LINC00467	chr1:211571663:+;chr1:211571698:+;chr1:211571731:+	chr1_211398354_+;chr1_211398388_+
chr11:95731286-95731352:mpeak_15220|chr11_95713127_96076344_MAML2_NM_-|	15.0713	3.53744	6.03279	0.586369	0.557627	0.999521	0	1.34826	165.575	0	0	0	0	13.932	0	0	0	0	599.064	Inf	Inf	NaN	MAML2	-	-
chr7:74977889-74977946:mpeak_71454|chr7_74703024_74988276_PMS2P5_NR_-|	10.0695	0.121174	2.08564	0.0580995	0.953669	NA	21.0103	1.79768	0	32.7293	18.0853	27.1711	3.36165	0.44942	0	4.56687	5.78729	5.87484	598.467	-1.77367	-2.09031	0.316637	PMS2P5	chr7:74977891:-	-
chr1:220198441-220198558:mpeak_7674|chr1_220142298_220220000_EPRS_NM_-|	182.496	1.15637	1.84827	0.62565	0.531545	0.999521	89.9241	221.564	1209.2	144.618	123.703	126.309	78.1583	94.3782	0	22.8344	52.0856	27.1711	587.581	1.94615	0.757045	1.18911	EPRS	-	-
chr14:20923359-20923597:mpeak_22516|chr14_20923289_20925149_APEX1_NM_+|	131.39	0.106214	1.68749	0.0629422	0.949813	0.999521	241.198	404.478	15.0523	309.025	219.193	147.605	54.6268	48.5373	10.0349	25.1178	65.8304	35.9834	583.688	-0.0325899	-0.16519	0.1326	APEX1	-	-
chr2:54021484-54021591:mpeak_41722|chr2_54014067_54045034_ERLEC1_NM_+|	50.6541	1.53584	1.60959	0.954184	0.339991	0.999521	58.8289	22.0216	225.784	62.4139	40.511	58.0141	28.574	19.7745	5.01743	24.3567	39.7876	22.765	574.589	0.930007	-0.703591	1.6336	ERLEC1	-	-
chr12:50480065-50480137:mpeak_17781|chr12_50478982_50492729_SMARCD1_NM_+|	111.83	3.20513	1.85703	1.72594	NA	NA	21.0103	29.6617	857.981	41.863	26.7662	32.3116	45.3823	92.1311	25.0872	39.5796	83.1922	46.9987	558.825	3.17022	-0.0622546	3.23247	SMARCD1	-	chr12_50086346_+
chr20:21314738-21314835:mpeak_47423|chr20_21283941_21369910_XRN2_NM_+|	147.532	0.521666	1.76365	0.295788	0.767392	0.999521	95.807	73.2554	1159.03	57.0859	36.1705	69.7637	63.8713	18.4262	155.54	15.9841	16.6384	8.81226	558.401	3.02623	2.52106	0.505164	XRN2	-	chr20_21334158_+
chr1:211564986-211565047:mpeak_7462|chr1_211556096_211605660_LINC00467_NR_+|	5.07942	1.49027	2.34552	0.635367	0.525189	NA	8.40412	0.89884	0	5.32802	14.4682	16.8902	0.840412	0	0	6.08916	2.89364	5.14049	553.476	-1.97948	-4.07084	2.09135	LINC00467	-	chr1_211391687_+
chr1:109289305-109289416:mpeak_3914|chr1_109289284_109351404_STXBP3_NM_+|	45.1183	-0.95356	1.86101	-0.512388	0.608379	0.999521	37.8186	65.6153	0	150.707	115.022	115.294	15.1274	3.59536	0	8.3726	15.915	13.9527	552.449	-1.88117	-1.0303	-0.850867	STXBP3	-	chr1_108746783_+
chr13:34395269-34395417:mpeak_21248|chr13_34392205_34540223_RFC3_NM_+|	26.2108	-0.121827	1.93896	-0.0628312	0.949901	0.999521	44.5419	14.8309	10.0349	102.755	52.809	70.4981	4.20206	0	0	6.08916	2.89364	5.87484	550.583	-1.70355	-1.82204	0.118485	RFC3	-	chr13_33821193_+;chr13_33821236_+
chr16:90025648-90025779:mpeak_31258|chr16_90015138_90032268_DEF8_NM_+|	81.8282	-1.20587	1.80505	-0.668054	0.504099	0.999521	156.317	75.5025	0	168.974	224.981	218.104	30.2548	28.3135	5.01743	23.5955	34.7237	16.1558	546.866	-1.40067	-0.228054	-1.17262	DEF8	chr16:90025774:+	chr16_89959275_+;chr16_89959311_+
chr10:93711146-93711314:mpeak_10894|chr10_93683735_93788546_BTAF1_NM_+|	11.9227	1.36622	3.47066	0.393648	0.693841	NA	0	7.19072	120.418	3.04458	0	0	0	11.6849	0	0	0	0.734355	546.042	5.38934	3.99203	1.39732	BTAF1	-	chr10_91951439_+
chr15:101814816-101814892:mpeak_28109|chr15_101811850_101817725_VIMP_NM_-|	21.9819	0.603263	1.65845	0.363751	0.716044	0.999521	48.7439	19.7745	55.1917	34.2516	28.9364	38.9208	2.52124	12.5838	0	6.08916	7.95752	8.81226	546.001	0.276856	-0.597733	0.874589	VIMP	-	chr15_101274605_-
chr18:29432567-29432631:mpeak_36302|chr18_29410952_29523091_TRAPPC8_NM_-|	28.9563	2.70823	2.43304	1.11311	0.265663	0.999521	0	2.69652	240.837	3.04458	0.723411	9.54662	2.52124	19.3251	45.1569	7.61146	9.40434	6.6092	545.198	4.19304	1.50392	2.68912	TRAPPC8	-	-
chr9:126163825-126163969:mpeak_79401|chr9_126144904_126692417_DENND1A_NM_-|	44.77	-0.641536	1.97299	-0.325159	0.74506	0.999521	42.0206	74.1543	0	105.038	134.554	114.559	2.52124	18.8756	0	11.4172	27.4896	6.6092	542.953	-1.60807	-1.08897	-0.519096	DENND1A	chr9:126163775:-;chr9:126163826:-;chr9:126163868:-	chr9_123401590_-
chr9:5092352-5092416:mpeak_77136|chr9_4985244_5126683_JAK2_NM_+|	165.312	-2.18115	2.22118	-0.981979	NA	NA	326.08	24.2687	5.01743	571.62	492.643	518.455	0	22.0216	0	7.61146	8.68093	7.34355	537.906	-2.15503	-0.102064	-2.05296	JAK2	chr9:5092410:+	-
chr3:167761161-167761275:mpeak_55759|chr3_167728206_167813713_GOLIM4_NM_-|	16.4902	4.24777	2.96368	1.43328	0.151779	0.916228	0	0	105.366	2.28344	0	4.40613	9.24454	0	30.1046	14.4618	19.5321	12.484	535.545	3.97735	-0.240214	4.21757	GOLIM4	-	-
chr10:12077056-12077447:mpeak_9021|chr10_11963306_12085169_UPF2_NM_-|	209.553	0.452404	2.24639	0.201392	NA	NA	10.0849	28.3135	1776.17	100.471	87.5327	99.138	11.7658	7.19072	321.116	17.5063	30.3833	24.9681	533.584	2.65979	2.22269	0.437104	UPF2	-	chr10_12035061_-;chr10_12035132_-;chr10_12035156_-;chr10_12035175_-;chr10_12035222_-;chr10_12035238_-;chr10_12035349_-
chr17:35979804-35979889:mpeak_33032|chr17_35974398_36003493_DDX52_NM_-|	83.6995	2.68603	2.14834	1.25028	0.211197	0.984848	6.7233	95.277	717.493	14.4618	9.40434	19.0932	10.9254	94.3782	0	4.56687	15.915	16.1558	518.813	4.25369	1.52315	2.73054	DDX52	-	chr17_37619771_-
chr19:50484877-50485028:mpeak_39765|chr19_50480041_50528805_VRK3_NM_-|	45.1929	0.837334	1.99343	0.420048	NA	NA	12.6062	247.181	5.01743	73.07	59.3197	63.1546	7.56371	26.5158	0	13.7006	21.7023	12.484	518.014	0.437433	-0.49073	0.928163	VRK3	chr19:50484888:-;chr19:50484962:-	chr19_49981686_-
chr3:134251614-134251733:mpeak_54915|chr3_134204574_134293634_CEP63_NM_+|	4.16145	2.04803	2.43273	0.841864	0.399864	NA	7.56371	0.44942	5.01743	5.32802	5.06388	13.9527	0.840412	0	0	0.761146	3.61705	7.34355	516.832	-0.901705	-3.80195	2.90024	CEP63	-	chr3_134532845_+
chrX:101409707-101409771:mpeak_81913|chrX_101409274_101410986_BEX5_NM_-|	51.6646	-0.485843	2.07261	-0.234411	0.814666	0.999521	41.1802	200.891	0	77.6369	133.108	78.576	10.9254	35.9536	0	6.85031	26.0428	8.81226	516.374	-0.257239	0.168707	-0.425946	BEX5	chrX:101409712:-	chrX_102154743_-;chrX_102154768_-
chr1:181705404-181705480:mpeak_6605|chr1_181452685_181767427_CACNA1E_NM_+|	86.1326	9.16286	6.00863	1.52495	NA	NA	0	0	862.998	0	0	0	0	0	170.593	0	0	0	505.882	Inf	Inf	NaN	CACNA1E	-	chr1_181736358_+
chr5:131924445-131924585:mpeak_63179|chr5_131892615_131977869_RAD50_NM_+|	12.3159	5.01273	2.57333	1.94796	0.0514203	NA	0	1.34826	80.2789	3.04458	5.06388	3.67178	0	8.08956	0	11.4172	24.596	10.281	504.522	2.79268	-2.5167	5.30938	RAD50	-	chr5_132588857_+
chr19:20139968-20140018:mpeak_38392|chr19_20118084_20150277_ZNF682_NM_-|	2.32944	5.75027	3.40649	1.68804	0.0914044	NA	0	13.4826	0	0	0.723411	0	0	2.69652	0	3.80573	6.5107	0.734355	500	4.22014	-2.03498	6.25512	ZNF682	-	-
chr7:74949867-74949925:mpeak_71452|chr7_74703024_74988276_PMS2P5_NR_-|	9.37487	-0.0427477	2.09402	-0.0204142	0.983713	NA	17.6487	1.34826	0	29.6847	18.8087	24.9681	3.36165	0.44942	0	4.56687	5.78729	5.87484	498.467	-1.95122	-2.09031	0.139085	PMS2P5	chr7:74949870:-	-
chr7:17373523-17373676:mpeak_70140|chr7_17338275_17382544_AHR_NM_+|	14.9044	0.312951	1.88908	0.165664	0.868422	0.999521	42.0206	27.864	0	35.7738	20.2555	18.3589	5.04247	8.9884	0	3.04458	7.95752	9.54662	498.078	-0.0900987	-0.550444	0.460345	AHR	-	chr7_17333965_+;chr7_17334051_+
chrX:53432170-53432284:mpeak_81155|chrX_53407107_53449677_SMC1A_NM_-|	360.007	3.16146	1.9843	1.59324	0.111107	0.828283	94.9666	144.713	2930.18	76.8757	51.3622	54.3423	229.433	402.68	5.01743	132.439	110.682	87.3883	497.521	4.11782	0.946897	3.17092	SMC1A	-	chrX_53405232_-;chrX_53405282_-
chr6:47501339-47501495:mpeak_66998|chr6_47445524_47591921_CD2AP_NM_+|	100.605	2.17519	1.78962	1.21545	NA	NA	35.2973	19.7745	697.423	56.3248	62.2133	40.3895	30.2548	36.403	85.2963	56.3248	37.6174	49.9362	495.212	2.24331	0.0787873	2.16452	CD2AP	-	chr6_47533738_+
chr9:131591376-131591448:mpeak_79737|chr9_131585112_131592100_C9orf114_NM_-|	175.714	-0.702684	1.86157	-0.377468	0.705826	0.999521	231.113	359.536	10.0349	578.471	382.684	352.491	21.0103	60.2223	0	51.7579	28.9364	32.3116	492.975	-1.1289	-0.476269	-0.652629	C9orf114	-	chr9_128829111_-
chr14:73569854-73570188:mpeak_24312|chr14_73525220_73586420_RBM25_NM_+|	428.427	0.314201	2.03021	0.154763	0.877008	0.999521	63.8713	171.678	3717.92	95.1432	91.8732	121.169	21.0103	78.6485	702.44	19.7898	28.213	29.3742	492.89	3.68125	3.3738	0.307446	RBM25	chr14:73569856:+	chr14_73103167_+;chr14_73103210_+;chr14_73103242_+;chr14_73103392_+;chr14_73103436_+;chr14_73103475_+
chr7:76648290-76648348:mpeak_71545|chr7_76610138_76652910_DTX2P1-UPK3BP1-PMS2P11_NR_+|	9.84696	-0.0110889	2.09359	-0.00529662	0.995774	NA	23.5315	1.34826	0	27.4012	23.8726	20.5619	4.20206	0.89884	0	7.61146	5.06388	3.67178	487.753	-1.52973	-1.68021	0.150485	DTX2P1-UPK3BP1-PMS2P11	chr7:76648345:+	-
chr2:217288354-217288418:mpeak_46073|chr2_217277136_217347460_SMARCAL1_NM_+|	9.45676	5.34435	3.35767	1.59168	NA	NA	0	0	75.2615	0	0	0	1.68082	29.2123	0	0.761146	2.89364	3.67178	487.238	Inf	2.07608	Inf	SMARCAL1	-	-
chr4:148768296-148768379:mpeak_59737|chr4_148653452_148993143_ARHGAP10_NM_+|	51.4025	1.80608	1.87167	0.964958	0.334566	0.999521	15.9678	20.6733	396.377	11.4172	18.8087	24.9681	8.40412	35.5042	45.1569	4.56687	17.3619	17.6245	486.181	2.97185	1.17106	1.80078	ARHGAP10	-	chr4_147847218_+
chr17:5253845-5253935:mpeak_31720|chr17_5185557_5286888_RABEP1_NM_+|	47.9818	2.2754	1.8197	1.25043	0.211144	0.984848	14.287	16.1791	316.098	23.5955	29.6598	22.0307	21.8507	41.3466	10.0349	11.4172	31.8301	37.4521	473.24	2.20267	-0.140079	2.34275	RABEP1	-	-
chr6:42336154-42336207:mpeak_66767|chr6_42196407_42419789_TRERF1_NM_-|	46.2235	18.079	5.92232	3.05269	NA	NA	0	0	386.342	0	0	0	8.40412	0	155.54	0	0.723411	3.67178	471.309	Inf	5.22114	Inf	TRERF1	-	-
chr1:1588881-1588944:mpeak_124|chr1_1571218_1655859_CDK11B_NM_-|	27.2734	3.02305	1.94127	1.55726	0.119409	0.854993	12.6062	8.53898	190.662	9.89489	3.61705	11.0153	4.20206	35.9536	5.01743	12.1783	12.298	21.2963	468.88	3.11029	-0.0190213	3.12932	CDK11B	-	-
chr2:27667108-27667227:mpeak_41039|chr2_27665232_27669167_KRTCAP3_NM_+|	75.7057	0.126281	2.45102	0.0515218	0.95891	0.999521	264.73	0.89884	5.01743	195.614	217.747	157.886	19.3295	0	0	14.4618	17.3619	15.4215	466.724	-1.07771	-1.28936	0.211653	KRTCAP3	chr2:27667164:+	chr2_27444296_+
chr15:44106739-44106898:mpeak_26189|chr15_44097474_44116951_MFAP1_NM_-|	27.5412	1.73878	1.88645	0.921717	0.356676	0.999521	5.04247	47.1891	180.627	11.4172	9.40434	21.2963	12.6062	20.6733	0	8.3726	5.78729	8.07791	466.471	2.46695	0.58162	1.88533	MFAP1	-	chr15_43814504_-;chr15_43814616_-;chr15_43814649_-
chr6:12129983-12130108:mpeak_65365|chr6_12012723_12163515_HIVEP1_NM_+|	31.5155	3.71802	3.41266	1.08948	0.275943	0.999521	0	0	260.906	0	0.723411	0	0	6.7413	105.366	1.52229	0.723411	2.20307	465.458	8.4945	4.65533	3.83917	HIVEP1	-	-
chr2:233433863-233433931:mpeak_46511|chr2_233415296_233445613_EIF4E2_NM_+|	129.867	-1.98656	1.81583	-1.09402	0.273946	0.999521	186.572	164.937	0	286.952	384.131	339.272	26.0528	72.3566	15.0523	15.9841	31.1067	35.9834	464.706	-1.52323	0.449734	-1.97296	EIF4E2	chr2:233433886:+;chr2:233433920:+	chr2_232569209_+
chr3:185649355-185649726:mpeak_56308|chr3_185635513_185655924_TRA2B_NM_-|	906.445	5.14621	2.07988	2.47429	NA	NA	18.4891	177.97	7937.57	13.7006	53.5324	44.7957	328.601	376.614	1063.7	192.57	384.131	285.664	459.833	6.18203	1.03649	5.14554	TRA2B	chr3:185649520:-	chr3_185931671_-;chr3_185931722_-;chr3_185931768_-;chr3_185931850_-
chr19:42492688-42492765:mpeak_39206|chr19_42471117_42498428_ATP1A3_NM_-|	9.02421	1.17882	6.0218	0.195758	0.844799	NA	0	0	75.2615	0	0	0	0	17.9768	15.0523	0	0	0	455.728	Inf	Inf	NaN	ATP1A3	-	-
chr15:36906144-36906313:mpeak_25783|chr15_36871803_37100524_C15orf41_NM_+|	18.7405	3.22985	2.44782	1.31948	0.187008	0.956857	1.68082	4.04478	175.61	4.56687	0.723411	1.46871	5.04247	21.5722	0	0.761146	8.68093	0.734355	454.226	4.74571	1.38699	3.35872	C15orf41	-	-
chrX:24717533-24717657:mpeak_80688|chrX_24712063_25013921_POLA1_NM_+|	41.7569	-0.56943	1.72733	-0.329658	0.741658	0.999521	53.7864	138.871	80.2789	79.1591	17.3619	48.4674	21.8507	33.7065	5.01743	0.761146	13.7448	8.07791	450.578	0.912625	1.42342	-0.510797	POLA1	-	chrX_24699513_+
chr3:142094705-142094791:mpeak_55163|chr3_142030655_142166904_XRN1_NM_-|	28.3134	3.63621	2.5471	1.42759	0.15341	0.916228	0	4.94362	245.854	2.28344	1.44682	4.40613	16.8082	39.9984	0	0.761146	15.915	7.34355	441.494	4.94599	1.24184	3.70415	XRN1	-	chr3_142375906_-
chr5:149775981-149776414:mpeak_64070|chr5_149737201_149779372_TCOF1_NM_+|	75.7292	-0.418904	1.96867	-0.212785	0.831495	0.999521	57.148	322.234	0	132.439	76.6815	108.685	39.4994	84.9404	5.01743	27.4012	24.596	30.1086	439.584	0.255508	0.656919	-0.401412	TCOF1	chr5:149776241:+;chr5:149776359:+;chr5:149776406:+	chr5_150396679_+;chr5_150396752_+;chr5_150396766_+;chr5_150396797_+;chr5_150396846_+
chrX:119570260-119570409:mpeak_82244|chrX_119565317_119603204_LAMP2_NM_-|	275.803	1.89201	1.91187	0.989612	0.322364	0.999521	254.645	222.013	1886.55	76.1146	172.172	126.309	239.518	119.096	0	49.4745	98.3839	65.3576	439.324	2.65734	0.750116	1.90723	LAMP2	chrX:119570349:-;chrX:119570379:-	chrX_120436379_-;chrX_120436496_-;chrX_120436540_-
chr2:27434578-27434649:mpeak_40993|chr2_27422705_27435175_SLC5A6_NR_-mpeak_40993|chr2_27423447_27435175_SLC5A6_NM_-||	5.60599	2.53974	2.48718	1.02114	0.30719	NA	12.6062	4.4942	5.01743	15.2229	8.68093	2.93742	1.68082	0	0	14.4618	2.17023	0	438.63	-0.279244	-3.30672	3.02748	SLC5A6	-	-
chr7:98015263-98015522:mpeak_72038|chr7_97922908_98030427_BAIAP2L1_NM_-|	87.148	3.45109	2.05314	1.68089	0.0927851	0.775285	41.1802	4.04478	607.109	38.0573	7.23411	23.4994	40.3398	103.367	5.01743	42.6242	71.6177	61.6858	438.621	3.24532	-0.242347	3.48767	BAIAP2L1	-	-
chr17:57125038-57125186:mpeak_34288|chr17_57060282_57184266_TRIM37_NM_-|	65.2864	0.828506	2.0192	0.410314	0.681576	0.999521	133.626	7.64014	5.01743	216.926	100.554	159.355	21.0103	1.34826	0	44.1464	60.7665	33.046	436.173	-1.70473	-2.62534	0.92061	TRIM37	-	chr17_59047792_-
chr13:27254164-27254228:mpeak_21058|chr13_27131839_27259824_WASF3_NM_+|	10.9661	2.81544	2.21224	1.27266	0.203137	NA	5.04247	0.44942	75.2615	4.56687	4.34046	2.93742	12.6062	0.89884	5.01743	3.04458	13.0214	4.40613	435.975	2.76927	-0.144384	2.91366	WASF3	-	-
chr7:74317068-74317122:mpeak_71423|chr7_74306886_74335466_PMS2P5_NR_+|	5.57397	1.04754	2.12258	0.493519	0.621646	NA	14.287	2.2471	0	11.4172	13.0214	5.87484	3.36165	0.44942	0	4.56687	5.78729	5.87484	433.844	-0.874511	-2.09031	1.2158	PMS2P5	chr7:74317123:+	-
chr20:43126522-43126665:mpeak_48075|chr20_43124996_43150726_SERINC3_NM_-|	4.78713	1.09716	2.07342	0.529156	0.596697	NA	9.24454	9.88724	0	6.08916	9.40434	5.87484	0.840412	3.59536	0	2.28344	3.61705	6.6092	431.307	-0.159505	-1.49579	1.33628	SERINC3	chr20:43126577:-	-
chr18:77960408-77960567:mpeak_37011|chr18_77918489_78005397_PARD6G_NM_-|	7.83348	-0.496338	2.01716	-0.246057	0.805638	NA	13.4466	5.39304	0	15.2229	18.0853	25.7024	0.840412	3.59536	0	1.52229	5.78729	4.40613	424.721	-1.6472	-1.40119	-0.246016	PARD6G	chr18:77960431:-;chr18:77960516:-	chr18_80202525_-
chr20:9149556-9149624:mpeak_47176|chr20_9049700_9459567_PLCB4_NM_+|	52.8987	-1.29685	2.33907	-0.554428	0.579286	0.999521	197.497	12.1343	0	196.376	45.5749	99.8723	0.840412	48.5373	0	11.4172	15.1916	7.34355	424.546	-0.705395	0.540349	-1.24574	PLCB4	-	chr20_9168966_+
chr4:100480304-100480416:mpeak_58856|chr4_100470513_100485214_TRMT10A_NM_-|	9.48577	0.143743	2.03396	0.0706714	0.943659	NA	21.8507	15.2803	0	21.3121	14.4682	16.8902	3.36165	5.39304	0	0.761146	11.5746	2.93742	424.127	-0.50437	-0.802869	0.298499	TRMT10A	-	-
chr7:25164815-25164884:mpeak_70338|chr7_25163468_25164980_CYCS_NM_-|	1350.4	0.156146	1.95695	0.0797907	0.936404	0.999521	2091.79	2080.81	30.1046	4560.78	1607.42	2522.51	664.766	325.829	10.0349	689.598	897.029	724.074	420.006	-1.04816	-1.20742	0.159265	CYCS	chr7:25164819:-	chr7_25125223_-;chr7_25125247_-
chr1:154207074-154207274:mpeak_5496|chr1_154192647_154243356_UBAP2L_NM_+|	73.1673	-1.99523	1.77855	-1.12183	0.261936	0.999521	130.264	201.34	35.122	219.971	96.937	117.497	10.9254	47.6385	0	3.04458	10.1278	5.14049	417.466	-0.244338	1.67716	-1.92149	UBAP2L	-	chr1_154234659_+
chr3:195966418-195966624:mpeak_56582|chr3_195965765_196014584_PCYT1A_NM_-|	56.5907	-3.04028	1.89723	-1.60248	0.109049	0.822857	120.179	109.658	15.0523	163.646	96.2136	127.043	4.20206	35.0548	0	0.761146	4.34046	2.93742	415.876	-0.659841	2.28785	-2.94769	PCYT1A	chr3:195966418:-	-
chr1:109766594-109766671:mpeak_3988|chr1_109756514_109780352_SARS_NM_+|	575.86	0.678965	1.31365	0.516854	0.605258	0.999521	848.816	584.246	2132.41	704.821	530.984	553.704	277.336	298.415	285.994	277.057	232.215	184.323	413.75	0.994529	0.313166	0.681363	SARS	chr1:109766670:+	chr1_109224024_+
chr19:44152715-44152892:mpeak_39279|chr19_44150700_44174498_PLAUR_NM_-|	93.141	2.09311	3.08217	0.679103	NA	NA	5.88289	985.578	5.01743	0	19.5321	10.281	0	80.8956	0	7.61146	2.89364	0	410.603	5.06282	2.94497	2.11785	PLAUR	chr19:44152731:-;chr19:44152765:-;chr19:44152801:-;chr19:44152835:-	chr19_43648580_-;chr19_43648634_-;chr19_43648651_-
chr10:43622861-43622992:mpeak_9714|chr10_43572516_43623559_RET_NM_+|	122.794	-0.734332	2.32479	-0.31587	0.752101	0.999521	324.399	3.14594	220.767	300.653	245.96	291.539	44.5419	0	0	22.0732	7.23411	13.2184	410.335	-0.612213	0.0668257	-0.679039	RET	chr10:43622916:+;chr10:43622952:+;chr10:43622988:+	chr10_43127464_+;chr10_43127504_+
chr3:169797552-169797641:mpeak_55791|chr3_169755734_169801692_GPR160_NM_+|	25.1835	0.71194	2.43774	0.292049	0.770249	0.999521	38.659	0	0	50.9968	49.1919	33.7803	18.4891	0.44942	0	35.7738	51.3622	23.4994	408.258	-1.79302	-2.54642	0.753395	GPR160	-	-
chr22:28640707-28640905:mpeak_50413|chr22_28379839_29075853_TTC28_NM_-|	15.5027	5.39752	3.01163	1.79223	0.0730967	0.723007	0	0.44942	130.453	0	0	0	2.52124	40.8972	5.01743	3.04458	1.44682	2.20307	405.389	Inf	2.85503	Inf	TTC28	-	-
chr12:48096491-48096639:mpeak_17588|chr12_48057373_48099844_RPAP3_NM_-|	46.6779	-0.142797	1.72053	-0.0829962	0.933855	0.999521	52.1056	62.0199	10.0349	101.232	141.789	113.091	3.36165	17.078	0	12.9395	34.0003	12.484	404.967	-1.52012	-1.53967	0.0195494	RPAP3	-	chr12_47702756_-
chr2:46844376-46844441:mpeak_41600|chr2_46844310_46851301_CRIPT_NM_+|	98.5153	-0.330665	1.96646	-0.168153	0.866463	0.999521	122.7	186.06	0	289.996	180.129	193.135	39.4994	36.8524	0	29.6847	58.5963	45.53	404.391	-1.10309	-0.809462	-0.293629	CRIPT	chr2:46844441:+	chr2_46617292_+
chr10:27456405-27456594:mpeak_9398|chr10_27443752_27475307_MASTL_NM_+|	14.8181	-1.2143	2.07378	-0.585546	0.55818	0.999521	31.0953	0.89884	0	31.9681	45.5749	45.53	2.52124	5.39304	0	6.08916	4.34046	4.40613	404.258	-1.94364	-0.90655	-1.03709	MASTL	chr10:27456470:+;chr10:27456517:+;chr10:27456589:+	chr10_27167540_+;chr10_27167593_+;chr10_27167658_+
chr7:26236422-26236648:mpeak_70357|chr7_26231958_26240413_HNRNPA2B1_NM_-mpeak_70357|chr7_26231958_26240413_HNRNPA2B1_NM_-||	997.335	1.27269	1.65075	0.770975	0.440722	0.999521	1228.68	329.425	4355.13	1474.34	562.814	827.618	840.412	97.0747	531.848	388.184	654.687	677.81	402.443	1.04553	-0.227817	1.27334	HNRNPA2B1	chr7:26236468:-;chr7:26236563:-	chr7_26196883_-;chr7_26196905_-;chr7_26197000_-
chr8:42401689-42401755:mpeak_74676|chr8_42396297_42407686_SMIM19_NM_+|	39.3814	4.06302	2.18531	1.85924	0.062993	0.689837	12.6062	0.44942	225.784	10.656	5.78729	16.1558	51.2651	3.14594	5.01743	41.1019	48.4685	52.1392	401.895	2.87314	-1.25371	4.12685	SMIM19	-	chr8_42546600_+
chr10:11799845-11799903:mpeak_9010|chr10_11784355_11805222_ECHDC3_NM_+|	6.98577	1.08629	2.59787	0.418145	0.675841	NA	16.8082	0	0	18.2675	15.915	5.14049	4.20206	0	0	4.56687	10.8512	8.07791	400	-1.2262	-2.48324	1.25704	ECHDC3	chr10:11799899:+	chr10_11757899_+
chr15:41576253-41576316:mpeak_25967|chr15_41576200_41590238_OIP5-AS1_NR_+|	147.613	0.631555	2.01909	0.312792	0.754439	0.999521	217.667	156.398	0	324.248	327.705	276.118	74.7967	20.6733	0	147.662	103.448	122.637	391.814	-1.31095	-1.96894	0.657998	OIP5-AS1	-	chr15_41284108_+
chr21:37514357-37514440:mpeak_49408|chr21_37507262_37518373_CBR3_NM_+|	3.64952	1.06007	2.54149	0.417106	0.676601	NA	10.0849	0	0	2.28344	5.06388	5.87484	3.36165	1.79768	0	0.761146	7.95752	6.6092	390.94	-0.390754	-1.5709	1.18015	CBR3	chr21:37514424:+;chr21:37514451:+	chr21_36142142_+
chrX:46583925-46584058:mpeak_80937|chrX_46466638_46618607_SLC9A7_NM_-|	153.727	2.43407	1.82888	1.33091	0.18322	0.956857	181.529	67.413	752.615	51.7579	167.108	126.309	96.6474	74.6037	0	104.277	99.8307	122.637	389.898	1.53684	-0.932052	2.4689	SLC9A7	-	chrX_46724499_-
chr11:33162957-33163115:mpeak_13148|chr11_33106835_33183037_CSTF3_NM_-|	60.0821	1.01715	1.74327	0.583471	0.559576	0.999521	57.148	85.8392	215.749	54.8025	83.1922	81.5134	9.24454	52.1327	0	10.656	34.7237	35.9834	389.652	0.708651	-0.406672	1.11532	CSTF3	chr11:33162977:-;chr11:33163048:-	chr11_33141432_-;chr11_33141488_-;chr11_33141542_-
chr1:24304422-24304784:mpeak_1134|chr1_24294213_24306953_SRSF10_NR_-mpeak_1134|chr1_24297929_24306953_SRSF10_NM_-||	328.229	3.28637	2.28007	1.44134	NA	NA	4.20206	21.5722	2980.35	9.89489	17.3619	17.6245	37.8186	75.0531	662.301	27.4012	49.9153	35.2491	387.801	6.06565	2.78375	3.2819	SRSF10	chr1:24304402:-	chr1_23977918_-;chr1_23978101_-;chr1_23978138_-;chr1_23978180_-;chr1_23978237_-
chr2:11427768-11427872:mpeak_40589|chr2_11323566_11484711_ROCK2_NM_-|	59.6006	3.84169	2.15295	1.78438	NA	NA	14.287	16.6285	466.621	12.9395	10.1278	13.9527	4.20206	81.345	0	22.0732	26.7662	46.2644	387.729	3.74843	-0.152785	3.90121	ROCK2	-	chr2_11287729_-
chr14:78197337-78197475:mpeak_24626|chr14_78184629_78227497_SNW1_NM_-|	143.823	1.38966	2.01186	0.69073	0.489735	0.999521	24.372	205.385	983.416	52.519	77.405	77.8417	34.4569	174.824	0	19.7898	33.2769	42.5926	386.457	2.54576	1.12947	1.41629	SNW1	-	-
chr2:174091818-174091877:mpeak_44941|chr2_173940564_174130777_ZAK_NM_+|	106.594	2.92086	1.84883	1.57984	0.114144	0.838297	30.2548	57.0763	682.371	24.3567	36.1705	42.5926	63.8713	130.332	5.01743	53.2802	75.9581	77.8417	386.357	2.89998	-0.0558217	2.9558	ZAK	chr2:174091874:+	chr2_173227168_+
chr14:20924057-20924265:mpeak_22518|chr14_20923289_20925149_APEX1_NM_+|	68.2758	1.72927	1.63552	1.05732	0.290366	0.999521	54.6268	41.3466	341.185	63.9362	32.5535	45.53	54.6268	48.5373	10.0349	25.1178	65.8304	35.9834	386.186	1.62207	-0.16519	1.78726	APEX1	chr14:20924115:+	chr14_20455933_+;chr14_20455957_+;chr14_20456099_+
chr1:117584889-117584942:mpeak_4512|chr1_117569408_117602112_LOC101929099_NR_-|	4.89588	3.13376	2.63795	1.18795	0.234852	NA	15.9678	9.88724	0	3.80573	3.61705	5.14049	3.36165	0	0	2.28344	0	14.6871	384.559	1.04124	-2.33579	3.37703	LOC101929099	-	chr1_117042268_-
chr21:48055610-48055739:mpeak_49916|chr21_48055506_48084206_PRMT2_NM_+|	559.272	-0.0327446	1.89065	-0.0173192	0.986182	0.999521	512.651	854.797	30.1046	1931.03	1359.29	1036.18	115.977	127.186	0	258.79	251.747	233.525	383.16	-1.63029	-1.6135	-0.0167949	PRMT2	chr21:48055675:+	chr21_46635761_+
chr19:37470757-37470818:mpeak_38900|chr19_37407230_37487218_ZNF568_NM_+|	2.00939	3.31905	3.65408	0.908314	0.363712	NA	0	14.3814	0	0	0	0	1.68082	5.84246	0	0.761146	1.44682	0	382.318	Inf	1.76864	Inf	ZNF568	chr19:37470809:+	chr19_36979906_+
chr5:112783761-112783859:mpeak_62748|chr5_112363179_112824527_MCC_NM_-|	2.74304	1.74478	2.75587	0.633114	0.526659	NA	3.36165	0	0	4.56687	4.34046	2.93742	0	0.89884	0	3.04458	12.298	1.46871	373.999	-1.81701	-4.22522	2.40821	MCC	chr5:112783807:-	chr5_113448112_-
chr3:62301467-62301552:mpeak_53308|chr3_62249817_62304622_PTPRG-AS1_NR_-|	25.0706	1.04964	2.16352	0.485155	0.627567	0.999521	55.4672	13.4826	0	57.8471	48.4685	64.6233	9.24454	0	0	17.5063	20.2555	13.9527	372.922	-1.30986	-2.4839	1.17404	PTPRG-AS1	chr3:62301484:-	-
chr1:54520049-54520146:mpeak_2691|chr1_54519244_54576724_TCEANC2_NR_+mpeak_2691|chr1_54519244_54561957_TCEANC2_NM_+||	7.36701	4.54825	3.55476	1.27948	0.200728	NA	0	1.34826	75.2615	0	0	0	0	10.3367	0	0	0.723411	0.734355	370.573	Inf	2.82594	Inf	TCEANC2	-	-
chr6:101311936-101312094:mpeak_68032|chr6_100957409_101329248_ASCC3_NM_-|	34.5477	-0.267097	1.59392	-0.167572	0.86692	0.999521	80.6796	62.4694	40.1394	57.8471	43.4046	69.0294	15.9678	17.078	0	4.56687	7.23411	16.1558	369.766	0.106197	0.241267	-0.13507	ASCC3	-	-
chr10:126252165-126252228:mpeak_11959|chr10_126150340_126301832_LHPP_NM_+|	12.9507	-0.98805	2.08628	-0.473594	0.635789	0.999521	22.6911	1.34826	0	32.7293	49.9153	25.7024	3.36165	3.14594	0	11.4172	2.89364	2.20307	369.406	-2.17219	-1.34349	-0.828702	LHPP	chr10:126252225:+	chr10_124563653_+
chr7:77398059-77398241:mpeak_71566|chr7_77325742_77407846_RSBN1L_NM_+|	18.4312	3.00101	2.92026	1.02765	0.304115	0.999521	1.68082	3.59536	175.61	0	0	2.93742	0	22.9204	10.0349	0	0.723411	3.67178	365.923	5.94439	2.90651	3.03788	RSBN1L	-	-
chr1:28780084-28780134:mpeak_1440|chr1_28696092_28823045_PHACTR4_NM_+|	188.378	3.74162	2.20563	1.6964	0.0898106	0.763637	18.4891	16.1791	1540.35	24.3567	8.68093	21.2963	51.2651	374.367	5.01743	70.0254	62.2133	68.295	365.731	4.85737	1.10267	3.7547	PHACTR4	-	chr1_28453668_+
chrX:31863489-31863539:mpeak_80743|chrX_31140047_33357726_DMD_NM_-|	14.2351	0.870064	6.01539	0.14464	0.884995	0.999521	0	0	110.383	0	0	0	0	15.2803	45.1569	0	0	0	365.283	Inf	Inf	NaN	DMD	-	-
chr14:75283289-75283399:mpeak_24451|chr14_75230068_75302477_YLPM1_NM_+|	153.272	2.93865	2.04121	1.43966	0.149964	0.916228	36.1377	151.005	1239.31	19.7898	23.1491	18.3589	57.148	206.284	0	19.7898	48.4685	19.8276	360.991	4.54045	1.58045	2.96	YLPM1	-	chr14_74816636_+
chr6:72598482-72598532:mpeak_67332|chr6_72596405_73110197_RIMS1_NM_+|	74.9557	6.03936	6.00783	1.00525	NA	NA	0	0	577.004	0	0	0	0	1.34826	321.116	0	0	0	357.872	Inf	Inf	NaN	RIMS1	-	-
chr15:43170742-43170811:mpeak_26100|chr15_43038455_43213007_TTBK2_NM_-|	10.0152	-0.474606	3.50797	-0.135294	0.89238	NA	0	1.79768	100.349	0.761146	2.89364	0	0	14.3814	0	0	0	0	355.132	4.8047	Inf	-Inf	TTBK2	-	-
chr1:150978281-150978334:mpeak_5239|chr1_150969843_150980854_FAM63A_NM_-|	3.20558	0.839508	2.51028	0.334428	0.738057	NA	7.56371	0	0	6.85031	2.17023	3.67178	3.36165	0.89884	0	3.04458	7.23411	3.67178	355.063	-0.74679	-1.71122	0.964433	FAM63A	-	-
chr17:54910147-54910319:mpeak_34119|chr17_54869713_54911256_C17orf67_NM_-|	4.46355	3.37911	2.38558	1.41647	0.156637	NA	2.52124	14.3814	0	5.32802	2.17023	0	2.52124	2.2471	0	6.08916	3.61705	14.6871	354.477	1.17263	-2.35493	3.52755	C17orf67	chr17:54910110:-;chr17:54910146:-;chr17:54910266:-	chr17_56832750_-;chr17_56832862_-;chr17_56832908_-
chr1:170003526-170003692:mpeak_6233|chr1_169890922_170043879_KIFAP3_NM_-|	6.33803	3.90963	2.77692	1.4079	0.159161	NA	0	2.2471	50.1743	0	0	1.46871	6.7233	8.08956	0	1.52229	2.89364	2.93742	353.891	5.15753	1.01038	4.14716	KIFAP3	chr1:170003639:-	chr1_170034501_-
chr4:26417090-26417270:mpeak_57532|chr4_26321331_26432313_RBPJ_NM_+|	49.3971	1.75312	1.70778	1.02655	0.304631	0.999521	17.6487	35.9536	260.906	24.3567	26.7662	45.53	8.40412	31.01	50.1743	19.0286	29.6598	43.327	351.06	1.70221	-0.0385641	1.74078	RBPJ	-	chr4_26415486_+
chr1:151089857-151089999:mpeak_5257|chr1_151043079_151090432_GABPB2_NM_+|	21.5787	1.39211	1.68949	0.823982	0.40995	0.999521	21.8507	5.84246	35.122	44.1464	36.894	31.5773	2.52124	9.43782	0	19.0286	23.1491	29.3742	350.168	-0.842248	-2.58089	1.73864	GABPB2	-	chr1_151117513_+
chr20:62695404-62695500:mpeak_48973|chr20_62688438_62703524_TCEA2_NM_+|	95.0519	0.750445	1.86875	0.401576	0.687996	0.999521	200.859	139.77	5.01743	203.226	156.257	108.685	87.4029	6.29188	5.01743	86.7706	75.2347	66.092	350.155	-0.43773	-1.20835	0.770619	TCEA2	chr20:62695426:+;chr20:62695476:+;chr20:62695536:+	chr20_64064084_+;chr20_64064122_+;chr20_64064184_+
chr3:69077313-69077473:mpeak_53477|chr3_69072471_69101484_TMF1_NM_-|	6.67697	1.87971	2.16944	0.866451	0.386243	NA	0	4.94362	15.0523	6.08916	7.95752	7.34355	1.68082	4.04478	0	22.0732	5.06388	5.87484	349.237	-0.0972475	-2.52749	2.43024	TMF1	-	chr3_69028246_-
chr5:34937423-34937687:mpeak_60953|chr5_34929697_34954657_DNAJC21_NM_+|	68.0787	1.88097	1.63137	1.153	0.248911	0.999521	36.9781	26.5158	210.732	89.054	60.7665	69.0294	52.946	20.6733	5.01743	76.8757	84.6391	83.7165	348.725	0.325423	-1.64087	1.96629	DNAJC21	chr5:34937555:+	chr5_34937436_+;chr5_34937471_+;chr5_34937544_+
chr13:79212952-79213145:mpeak_21981|chr13_79191257_79233314_RNF219_NM_-|	17.7602	2.26886	2.771	0.818787	0.412908	0.999521	1.68082	7.64014	150.523	3.04458	0	0	0.840412	39.9984	5.01743	0.761146	3.61705	0	348.576	5.71428	3.38871	2.32557	RNF219	-	chr13_78638822_-
chr12:105558410-105558515:mpeak_19601|chr12_105501491_105560641_KIAA1033_NM_+|	81.1624	1.96974	1.6759	1.17533	0.239861	0.999521	42.861	36.403	471.638	47.9522	35.4471	40.3895	29.4144	35.0548	95.3312	28.1624	70.1708	41.1239	344.744	2.15392	0.196449	1.95747	KIAA1033	-	chr12_105164740_+
chr14:50146191-50146399:mpeak_23321|chr14_50110388_50155098_POLE2_NM_-|	21.6324	-1.64513	1.81784	-0.904992	0.365469	0.999521	42.861	19.7745	5.01743	35.7738	56.426	74.9042	5.04247	8.08956	0	0.761146	5.06388	5.87484	343.45	-1.30452	0.166599	-1.47112	POLE2	chr14:50146190:-;chr14:50146246:-;chr14:50146283:-;chr14:50146339:-	chr14_49679474_-;chr14_49679545_-
chr19:5611524-5611712:mpeak_37392|chr19_5587410_5622938_SAFB2_NM_-|	71.2642	4.54507	2.36992	1.91782	0.055134	0.651344	3.36165	4.4942	657.283	2.28344	6.5107	1.46871	50.4247	80.8956	0	10.656	26.0428	11.7497	337.668	6.01815	1.43857	4.57959	SAFB2	-	-
chr2:26437308-26437437:mpeak_40913|chr2_26414264_26467594_HADHA_NM_-|	494.481	0.176807	1.77373	0.0996813	0.920597	0.999521	2105.23	776.598	70.244	669.047	439.11	469.253	528.619	320.886	25.0872	212.36	188.087	129.247	337.537	0.904171	0.723454	0.180717	HADHA	-	-
chr6:30601468-30601600:mpeak_66061|chr6_30594612_30614245_ATAT1_NM_+|	14.5423	1.36604	1.79312	0.761823	0.446166	0.999521	9.24454	7.64014	50.1743	29.6847	10.8512	16.8902	8.40412	4.94362	0	5.32802	15.1916	16.1558	334.933	0.223726	-1.45822	1.68195	ATAT1	-	-
chrX:107782970-107783022:mpeak_82059|chrX_107683073_107939526_COL4A5_NM_+|	4.91482	1.74649	2.28496	0.764343	0.444663	NA	3.36165	31.01	0	1.52229	0.723411	4.40613	3.36165	7.19072	0	2.28344	1.44682	3.67178	325.724	2.36939	0.511573	1.85782	COL4A5	-	-
chrX:152995301-152995352:mpeak_82742|chrX_152990322_153008942_ABCD1_NM_+|	4.02165	3.25159	2.59823	1.25146	0.210765	NA	0	10.7861	0	0	2.17023	2.20307	1.68082	4.94362	0	6.08916	11.5746	8.81226	325.645	1.30238	-1.99881	3.30119	ABCD1	chrX:152995352:+	chrX_153729896_+
chr5:32395259-32395411:mpeak_60877|chr5_32356045_32444844_ZFR_NM_-|	122.372	2.67122	1.73549	1.53917	0.123762	0.860756	26.0528	53.481	777.702	41.863	33.2769	42.5926	55.4672	62.4694	145.505	62.4139	83.1922	84.4509	325.398	2.86418	0.195494	2.66868	ZFR	-	chr5_32395192_-;chr5_32395238_-
chr6:83834502-83834554:mpeak_67595|chr6_83777384_83877580_DOPEY1_NM_+|	23.6332	0.704312	6.01152	0.11716	0.906733	0.999521	0	0	175.61	0	0	0	0	7.64014	100.349	0	0	0	325.238	Inf	Inf	NaN	DOPEY1	-	-
chr4:156274324-156274487:mpeak_59870|chr4_156269057_156298122_MAP9_NM_-|	11.622	1.91698	1.7998	1.06511	0.286827	NA	5.04247	2.2471	20.0697	16.7452	20.9789	11.7497	3.36165	2.2471	0	21.3121	18.0853	17.6245	325.198	-0.854634	-3.34576	2.49113	MAP9	-	chr4_155353248_-
chr14:58930671-58930798:mpeak_23784|chr14_58894102_59014498_KIAA0586_NM_+|	13.0625	-2.95566	2.35156	-1.2569	0.208791	0.983365	30.2548	0	0	68.5031	10.1278	9.54662	5.88289	17.078	5.01743	2.28344	1.44682	6.6092	324.411	-1.54324	1.43615	-2.97939	KIAA0586	chr14:58930799:+	-
chr3:37343669-37343801:mpeak_52328|chr3_37284681_37407570_GOLGA4_NM_+|	32.7591	1.46752	1.83956	0.797754	0.425013	0.999521	5.88289	10.3367	175.61	42.6242	20.2555	11.7497	15.1274	24.7181	20.0697	12.9395	36.1705	17.6245	320.168	1.36201	-0.155511	1.51752	GOLGA4	-	chr3_37302296_+
chr21:30415725-30415801:mpeak_49180|chr21_30396937_30426386_USP16_NM_+|	21.5753	3.23171	2.25114	1.43558	0.151121	0.916228	0	3.14594	105.366	9.89489	10.8512	6.6092	15.9678	17.9768	0	22.8344	37.6174	28.6399	319.673	1.98796	-1.39211	3.38007	USP16	-	chr21_29043474_+
chr13:42293466-42293537:mpeak_21408|chr13_42142441_42535221_VWA8_NM_-|	7.61859	0.0972062	1.99725	0.04867	0.961182	NA	36.1377	4.04478	5.01743	3.80573	13.7448	11.7497	5.88289	3.59536	0	3.80573	2.17023	1.46871	317.921	0.625409	0.348412	0.276998	VWA8	chr13:42293473:-	chr13_41719339_-
chr9:173107-173254:mpeak_77053|chr9_121573_179075_CBWD1_NM_-|	38.4175	0.702672	1.91072	0.367752	0.713058	0.999521	131.104	18.8756	5.01743	31.207	100.554	69.0294	27.7336	4.94362	0	25.1178	20.2555	27.1711	316.219	-0.373447	-1.15058	0.777133	CBWD1	-	-
chr9:99413700-99413781:mpeak_78612|chr9_99404168_99417599_AAED1_NM_-|	15.2014	3.37641	1.95026	1.73126	0.0834059	0.742468	3.36165	7.19072	85.2963	6.85031	5.06388	6.6092	12.6062	7.64014	0	8.3726	15.1916	24.2337	315.609	2.37141	-1.23929	3.6107	AAED1	-	-
chr1:10707259-10707338:mpeak_512|chr1_10700116_10856733_CASZ1_NM_-|	16.9164	-0.400857	1.92992	-0.207707	0.835458	0.999521	25.2124	23.8193	0	38.0573	33.2769	38.1865	1.68082	13.932	0	7.61146	5.06388	16.1558	314.047	-1.15942	-0.884895	-0.274523	CASZ1	chr1:10707270:-	chr1_10647204_-
chr9:109630608-109630755:mpeak_78879|chr9_109625377_109773103_ZNF462_NM_+|	158.843	3.92665	2.79342	1.40568	NA	NA	0	5.39304	1259.37	0.761146	0	2.93742	19.3295	24.2687	566.97	3.04458	13.0214	11.0153	310.719	8.41769	4.49478	3.92291	ZNF462	-	chr9_106868473_+
chr8:17869158-17869313:mpeak_74054|chr8_17780365_17885145_PCM1_NM_+|	60.1818	0.914012	1.98472	0.460525	0.645139	0.999521	1.68082	34.1559	301.046	77.6369	60.7665	34.5147	5.88289	32.3582	70.244	47.9522	39.7876	16.1558	310.533	0.962157	0.0623631	0.899794	PCM1	-	chr8_18011706_+
chr2:203757370-203757433:mpeak_45739|chr2_203745660_203776949_WDR12_NM_-|	54.4102	2.29898	1.76288	1.3041	0.192199	0.957386	24.372	29.2123	316.098	25.1178	19.5321	16.8902	59.6693	54.8292	5.01743	23.5955	47.7451	30.8429	309.316	2.58669	0.22604	2.36065	WDR12	-	chr2_202892679_-
chr3:53265474-53265577:mpeak_53088|chr3_53259947_53290130_TKT_NR_-mpeak_53088|chr3_53259625_53290130_TKT_NM_-||	61.6034	-0.318981	1.98451	-0.160735	0.872302	0.999521	221.028	22.9204	0	184.197	26.7662	59.4828	53.7864	54.8292	10.0349	30.4458	41.2344	34.5147	308.404	-0.148763	0.160003	-0.308766	TKT	chr3:53265459:-	-
chr20:43126799-43126959:mpeak_48076|chr20_43124996_43150726_SERINC3_NM_-|	5.11131	0.133041	2.14907	0.0619065	0.950637	NA	4.20206	9.43782	0	19.7898	3.61705	7.34355	0.840412	3.59536	0	2.28344	3.61705	6.6092	307.497	-1.17277	-1.49579	0.323015	SERINC3	-	-
chr14:31789290-31789383:mpeak_22955|chr14_31762818_31889788_HEATR5A_NM_-|	123.408	-4.05917	2.07706	-1.95429	0.0506673	0.629388	187.412	447.173	5.01743	266.401	189.534	165.23	4.20206	13.4826	190.662	3.80573	6.5107	1.46871	306.989	0.0421994	4.14395	-4.10175	HEATR5A	chr14:31789323:-	-
chr18:43669801-43669965:mpeak_36507|chr18_43664329_43684199_ATP5A1_NM_-|	885.288	2.74015	1.9176	1.42895	0.15302	0.916228	944.623	118.197	5278.34	241.283	196.768	257.024	1497.61	546.045	25.0872	419.391	598.984	500.096	306.522	3.18951	0.446138	2.74337	ATP5A1	chr18:43669865:-	-
chr2:202006163-202006330:mpeak_45630|chr2_201980826_202027718_CFLAR_NM_+|	51.509	0.190799	2.16344	0.0881922	0.929724	0.999521	32.7761	225.159	0	70.0254	66.5538	63.1546	8.40412	75.952	0	28.1624	36.1705	11.7497	305.77	0.368932	0.148925	0.220007	CFLAR	chr2:202006216:+;chr2:202006321:+	chr2_201141490_+;chr2_201141537_+;chr2_201141596_+
chr1:68627143-68627226:mpeak_2995|chr1_68564436_68698284_WLS_NM_-|	19.141	-4.77198	2.51618	-1.89652	0.0578916	0.663341	22.6911	24.7181	80.2789	29.6847	23.8726	34.5147	0	13.932	0	0	0	0	305.503	0.53587	Inf	-Inf	WLS	-	-
chr2:32312553-32312614:mpeak_41187|chr2_32288679_32379442_SPAST_NM_+|	26.469	2.56453	2.64234	0.970549	0.331773	0.999521	0	0	125.436	7.61146	0	2.20307	21.8507	66.5141	35.122	13.7006	22.4257	22.765	304.735	3.67589	1.06823	2.60766	SPAST	-	-
chr13:79952917-79953047:mpeak_22001|chr13_79894845_79980356_RBM26_NM_-|	93.3402	3.47284	2.09621	1.65672	0.0975759	0.787292	2.52124	24.7181	752.615	6.08916	7.23411	4.40613	14.287	72.806	170.593	15.9841	24.596	24.2337	302.638	5.45899	1.99124	3.46775	RBM26	-	-
chr7:155493452-155493611:mpeak_73667|chr7_155437202_155567686_RBM33_NM_+|	63.0713	2.1546	2.05021	1.05092	0.293296	0.999521	11.7658	23.3698	471.638	8.3726	9.40434	15.4215	1.68082	105.614	60.2092	10.656	13.0214	25.7024	302.545	3.93216	1.7622	2.16996	RBM33	-	chr7_155700819_+;chr7_155700830_+;chr7_155700864_+
chr1:211572443-211572494:mpeak_7465|chr1_211556096_211605660_LINC00467_NR_+|	2.68751	1.10048	2.68293	0.410178	0.681676	NA	2.52124	0	0	5.32802	7.23411	2.20307	0.840412	0	0	6.08916	2.89364	5.14049	300	-2.55	-4.07084	1.52084	LINC00467	chr1:211572489:+	chr1_211399152_+
chr17:57089685-57089809:mpeak_34282|chr17_57060282_57184266_TRIM37_NM_-|	64.7714	-0.473203	1.95981	-0.241453	0.809204	0.999521	44.5419	22.471	0	146.901	300.215	102.81	21.0103	1.34826	0	44.1464	60.7665	33.046	299.719	-3.03673	-2.62534	-0.411389	TRIM37	-	-
chr8:74507404-74507542:mpeak_75246|chr8_74333700_74659943_STAU2_NM_-|	6.05471	0.75975	1.9956	0.380712	0.703417	NA	6.7233	0.89884	10.0349	15.2229	13.0214	4.40613	1.68082	2.2471	0	4.56687	6.5107	7.34355	299.683	-0.886862	-2.22952	1.34266	STAU2	-	-
chr11:95556297-95556383:mpeak_15203|chr11_95523624_95564189_CEP57_NM_+|	15.507	0.734047	2.32495	0.315725	0.752211	0.999521	0	52.1327	0	3.04458	11.5746	16.1558	4.20206	43.1443	5.01743	15.2229	26.0428	9.54662	298.676	0.760431	0.0433916	0.71704	CEP57	chr11:95556374:+	chr11_95823208_+
chr2:17876471-17876568:mpeak_40668|chr2_17846880_17935096_SMC6_NM_-|	32.5467	4.33986	3.21702	1.34903	0.177326	0.956172	0	0	200.697	3.80573	0	0	0	29.2123	105.366	9.89489	18.0853	23.4994	298.261	5.7207	1.38638	4.33433	SMC6	-	-
chr19:53151349-53151649:mpeak_39923|chr19_53118050_53193834_ZNF83_NM_-|	3.45385	1.57478	2.75626	0.571347	0.567765	NA	0	14.8309	0	4.56687	2.89364	2.93742	5.04247	0	0	6.08916	3.61705	1.46871	294.119	0.512305	-1.14806	1.66037	ZNF83	-	chr19_52648177_-
chr1:1577703-1577799:mpeak_121|chr1_1571218_1655859_CDK11B_NM_-|	28.5525	0.139222	1.79613	0.0775121	0.938216	0.999521	24.372	103.367	5.01743	40.3407	47.7451	30.8429	4.20206	35.9536	5.01743	12.1783	12.298	21.2963	293.883	0.158679	-0.0190213	0.1777	CDK11B	-	-
chr7:136935969-136936025:mpeak_73158|chr7_136912822_137028546_PTN_NM_-|	143.259	8.16169	6.00777	1.35852	NA	NA	0	3.14594	1465.09	0	0	0	0	0	250.872	0	0	0	292.627	Inf	Inf	NaN	PTN	-	chr7_137251225_-;chr7_137251255_-
chrX:129790575-129790679:mpeak_82424|chrX_129759419_130037291_ENOX2_NM_-|	13.1194	3.23266	2.62222	1.23279	0.217653	0.991938	0	0.44942	65.2266	6.85031	0	8.07791	11.7658	10.7861	0	6.85031	20.2555	27.1711	291.222	2.13732	-1.26709	3.40442	ENOX2	-	-
chr2:153528975-153529144:mpeak_44513|chr2_153512912_153573975_PRPF40A_NM_-|	267.949	1.48484	1.70577	0.870482	NA	NA	82.3604	100.67	1480.14	156.796	171.448	172.573	115.977	93.9288	361.255	127.872	154.087	198.276	291.192	1.73158	0.250156	1.48142	PRPF40A	-	chr2_152672461_-;chr2_152672543_-;chr2_152672595_-
chr1:20069805-20069888:mpeak_899|chr1_20009937_20126410_TMCO4_NM_-|	6.03584	0.328356	2.19222	0.149782	0.880936	NA	19.3295	4.94362	0	3.04458	10.1278	13.9527	7.56371	0.89884	0	3.04458	1.44682	8.07791	286.83	-0.160269	-0.570741	0.410472	TMCO4	chr1:20069812:-	chr1_19743321_-
chr17:19835113-19835159:mpeak_32382|chr17_19809545_19881169_AKAP10_NM_-|	5.74257	0.820866	2.21284	0.370957	0.71067	NA	5.88289	17.9768	0	16.7452	4.34046	0.734355	1.68082	6.7413	0	5.32802	4.34046	5.14049	283.298	0.128922	-0.814216	0.943138	AKAP10	-	-
chr6:37418038-37418124:mpeak_66629|chr6_37400906_37447788_CMTR1_NM_+|	87.0035	2.65988	1.96851	1.35121	0.176627	0.95561	31.0953	51.6833	627.179	28.9235	22.4257	14.6871	45.3823	121.793	0	24.3567	39.0642	37.4521	283.119	3.4264	0.72882	2.69758	CMTR1	-	chr6_37450339_+
chr8:17924265-17924464:mpeak_74061|chr8_17915132_17942507_ASAH1_NM_-|	140.151	-0.399459	1.78824	-0.223381	0.823239	0.999521	279.857	143.365	5.01743	305.981	311.79	246.743	100.009	47.6385	5.01743	78.398	89.7029	68.295	280.509	-1.01347	-0.630836	-0.382635	ASAH1	chr8:17924272:-;chr8:17924396:-;chr8:17924445:-	chr8_18066764_-
chr14:20923693-20923872:mpeak_22517|chr14_20923289_20925149_APEX1_NM_+|	71.6203	0.206492	1.64914	0.125212	0.900356	0.999521	116.817	189.206	10.0349	140.051	85.3625	77.8417	54.6268	48.5373	10.0349	25.1178	65.8304	35.9834	279.206	0.059658	-0.16519	0.224848	APEX1	-	chr14_20455587_+;chr14_20455660_+;chr14_20455676_+
chr6:18256588-18256692:mpeak_65535|chr6_18225961_18264799_DEK_NM_-|	312.71	0.131382	1.64099	0.0800624	0.936188	0.999521	239.518	643.12	280.976	513.012	461.536	576.469	132.785	281.786	5.01743	159.841	227.874	230.588	277.322	-0.414603	-0.559337	0.144734	DEK	-	chr6_18256429_-
chr6:83710742-83710794:mpeak_67592|chr6_83602761_83775560_UBE3D_NM_-|	7.91576	0.487838	2.03732	0.239451	0.810756	NA	20.1699	25.1675	0	6.85031	5.06388	9.54662	2.52124	13.932	0	1.52229	4.34046	5.87484	275.553	1.079	0.487236	0.591762	UBE3D	-	-
chr11:100730281-100730353:mpeak_15237|chr11_100558406_100859443_ARHGAP42_NM_+|	6.34483	4.68035	3.25419	1.43825	0.150363	NA	5.04247	6.29188	55.1917	0	0	0	0	8.08956	0	1.52229	0	0	274.123	Inf	2.40982	Inf	ARHGAP42	-	chr11_100859621_+
chr21:47549636-47549763:mpeak_49859|chr21_47518032_47551867_COL6A2_NM_+|	58.923	2.42627	5.0688	0.478667	NA	NA	0	403.579	0	1.52229	0	0	2.52124	293.471	0	3.04458	0	2.93742	272.696	8.05046	5.62879	2.42168	COL6A2	chr21:47549687:+;chr21:47549714:+	chr21_46129850_+
chr7:87229423-87229621:mpeak_71787|chr7_87133765_87342639_ABCB1_NM_-|	2329.99	-0.395575	3.21787	-0.122931	NA	NA	11.7658	22356.8	30.1046	3.04458	5.78729	19.0932	0	5522.92	5.01743	3.04458	0	2.20307	270.127	9.64764	10.0409	-0.393217	ABCB1	-	-
chr12:39735829-39735934:mpeak_17383|chr12_39688319_39837192_KIF21A_NM_-|	36.5515	1.60519	2.28101	0.703718	0.481608	0.999521	3.36165	2.69652	255.889	10.656	11.5746	15.4215	0.840412	11.2355	85.2963	4.56687	24.596	12.484	269.016	2.79847	1.2253	1.57317	KIF21A	chr12:39735835:-	-
chr3:160665685-160665749:mpeak_55691|chr3_160473995_160786598_PPM1L_NM_+|	29.726	-2.74634	2.05258	-1.33799	0.180899	0.956857	100.849	5.39304	5.01743	109.605	33.2769	66.8263	23.5315	4.04478	0	3.80573	2.89364	1.46871	268.975	-0.914449	1.75536	-2.66981	PPM1L	-	chr3_160947947_+
chr1:40035256-40035349:mpeak_2045|chr1_40026794_40042521_PABPC4_NM_-|	190.054	0.0190951	1.59399	0.0119795	0.990442	0.999521	121.019	230.552	250.872	468.866	292.258	289.336	150.434	63.8176	10.0349	38.0573	214.853	150.543	268.605	-0.802123	-0.84706	0.0449363	PABPC4	-	-
chr6:44413382-44413608:mpeak_66971|chr6_44355250_44414343_CDC5L_NM_+|	26.0412	1.53998	1.94378	0.792263	0.428207	0.999521	8.40412	21.5722	165.575	7.61146	7.95752	22.765	19.3295	29.2123	0	3.80573	11.5746	14.6871	268.568	2.35085	0.691027	1.65983	CDC5L	-	chr6_44445695_+
chr16:82197639-82197811:mpeak_30902|chr16_82182468_82203829_MPHOSPH6_NM_-|	133.724	-0.495599	1.6276	-0.304497	0.760749	0.999521	164.721	123.59	15.0523	296.847	347.961	290.805	70.5946	37.7513	5.01743	82.9649	113.575	55.811	267.603	-1.62486	-1.15448	-0.470383	MPHOSPH6	chr16:82197636:-	chr16_82163980_-;chr16_82164034_-;chr16_82164095_-
chr6:43244346-43244403:mpeak_66850|chr6_43211221_43252720_TTBK1_NM_+|	17.5985	0.410812	6.01312	0.0683192	0.945532	0.999521	0	0	120.418	0	0	0	0	0.44942	90.3137	0	0	0	265.346	Inf	Inf	NaN	TTBK1	chr6:43244401:+	chr6_43276661_+
chr15:48451036-48451150:mpeak_26303|chr15_48446090_48470558_MYEF2_NR_-mpeak_26303|chr15_48435268_48470558_MYEF2_NM_-||	47.5217	1.97112	1.724	1.14334	0.252896	0.999521	23.5315	10.7861	195.68	36.535	26.7662	35.2491	59.6693	17.5274	10.0349	51.7579	54.2558	48.4674	263.663	1.22269	-0.82451	2.0472	MYEF2	-	-
chr14:32563495-32563595:mpeak_22983|chr14_32546494_32623826_ARHGAP5_NM_+|	101.325	1.36326	1.99159	0.684506	0.493655	0.999521	5.04247	27.4146	582.022	67.742	60.7665	58.7484	15.9678	31.4594	185.645	55.5636	51.3622	74.1699	263.643	1.71434	0.364024	1.35032	ARHGAP5	-	chr14_32094344_+;chr14_32094370_+
chr15:72170373-72170426:mpeak_27218|chr15_72119384_72410440_MYO9A_NM_-|	8.53333	-2.03112	2.16641	-0.93755	0.348476	NA	0	16.6285	0	9.89489	28.213	16.1558	5.88289	3.14594	10.0349	2.28344	7.95752	2.20307	261.679	-1.70633	0.615374	-2.3217	MYO9A	-	chr15_71878044_-
chr4:141030817-141030948:mpeak_59575|chr4_140641477_141075233_MAML3_NM_-|	116.237	6.82754	6.00737	1.13653	NA	NA	0	0	1008.5	0	0	0	0	0	386.342	0	0	0	261.039	Inf	Inf	NaN	MAML3	-	-
chr10:51885161-51885218:mpeak_9876|chr10_51827647_51892565_FAM21A_NM_+|	19.8443	4.47491	2.68514	1.66654	0.0956053	0.7798	0	5.84246	155.54	0	0.723411	0.734355	12.6062	49.4362	0	3.04458	5.06388	5.14049	260.117	6.79058	2.22738	4.56321	FAM21A	-	-
chrX:44386522-44386617:mpeak_80893|chrX_44383521_44402221_FUNDC1_NM_-|	98.0961	1.20462	1.5949	0.755299	0.45007	0.999521	110.094	81.345	180.627	161.363	122.98	152.746	62.1905	33.7065	0	63.9362	122.98	85.1852	258.657	-0.232365	-1.50459	1.27222	FUNDC1	-	chrX_44527261_-
chr5:132039171-132039361:mpeak_63202|chr5_132032374_132073270_KIF3A_NM_-|	34.496	3.68437	2.03734	1.80843	0.0705402	0.719947	2.52124	11.2355	190.662	15.2229	9.40434	9.54662	15.9678	36.8524	0	35.7738	41.2344	45.53	258.006	2.58056	-1.21407	3.79463	KIF3A	-	chr5_132703596_-
chr17:17207336-17207505:mpeak_32229|chr17_17206679_17250118_NT5M_NM_+|	9.41141	0.141488	2.10016	0.0673699	0.946287	NA	16.8082	4.04478	0	23.5955	20.9789	24.9681	0	4.04478	0	6.08916	5.06388	7.34355	257.777	-1.73764	-2.19313	0.455488	NT5M	chr17:17207411:+;chr17:17207453:+;chr17:17207481:+	chr17_17304096_+;chr17_17304160_+
chr15:30064259-30064347:mpeak_25632|chr15_29993893_30261002_TJP1_NM_-|	177.502	-1.70992	1.69861	-1.00666	0.314099	0.999521	86.5625	774.8	265.924	155.274	188.81	160.089	13.4466	144.713	280.976	10.656	28.213	20.5619	256.706	1.16086	2.88538	-1.72452	TJP1	-	chr15_29772088_-
chr7:42261207-42261280:mpeak_70751|chr7_42006239_42276618_GLI3_NM_-|	12.0564	-1.00175	2.20335	-0.454651	0.649361	NA	17.6487	16.6285	0	34.2516	18.0853	27.9055	1.68082	11.6849	0	0	6.5107	10.281	256.456	-1.22711	-0.329206	-0.897908	GLI3	chr7:42261215:-	chr7_42221618_-
chr5:118809606-118809718:mpeak_62881|chr5_118788137_118877599_HSD17B4_NM_+|	224.668	-0.0649419	2.02724	-0.0320346	0.974444	0.999521	845.455	374.367	15.0523	433.853	242.343	235.728	261.368	59.7728	0	69.2643	84.6391	74.1699	256.351	0.437379	0.49371	-0.0563316	HSD17B4	-	chr5_119474015_+
chr8:53573496-53573578:mpeak_74849|chr8_53536419_53627026_RB1CC1_NM_-|	7.21101	1.96858	2.55301	0.771085	0.440656	NA	0	18.4262	0	9.13375	8.68093	5.14049	0	7.19072	0	15.9841	3.61705	18.3589	256.25	-0.317059	-2.40027	2.08321	RB1CC1	-	chr8_52660996_-
chr9:5098284-5098390:mpeak_77146|chr9_4985244_5126683_JAK2_NM_+|	54.2413	-2.12407	2.37121	-0.895778	0.370372	0.999521	109.254	3.59536	0	211.598	176.512	104.278	0	22.0216	0	7.61146	8.68093	7.34355	256.224	-2.12541	-0.102064	-2.02334	JAK2	-	chr9_5098333_+
chr12:111495868-111496028:mpeak_19869|chr12_111471827_111785327_CUX2_NM_+|	22.1603	1.34964	6.01283	0.22446	0.822399	0.999521	0	0	190.662	0	0	0	0	0	75.2615	0	0	0	253.333	Inf	Inf	NaN	CUX2	-	-
chr2:136266617-136266669:mpeak_44177|chr2_135958010_136288806_ZRANB3_NM_-|	9.80352	3.43861	2.94883	1.16609	0.243576	NA	2.52124	0.89884	95.3312	0.761146	0	1.46871	0	13.0332	0	0	2.89364	0.734355	252.564	5.46878	1.84494	3.62383	ZRANB3	chr2:136266609:-	chr2_135509042_-
chr10:126187026-126187089:mpeak_11958|chr10_126150340_126301832_LHPP_NM_+|	5.83287	0.322462	2.27275	0.141882	0.887173	NA	15.9678	0.44942	0	16.7452	9.40434	4.40613	3.36165	3.14594	0	11.4172	2.89364	2.20307	252.279	-0.896228	-1.34349	0.447258	LHPP	chr10:126187084:+	chr10_124498476_+;chr10_124498514_+
chr3:173323278-173323398:mpeak_55920|chr3_173116237_173998270_NLGN1_NM_+|	96.7859	14.8423	6.00734	2.4707	NA	NA	0	0	647.248	0	0	0	1.68082	0	511.778	0	0.723411	0	252.113	Inf	9.47122	Inf	NLGN1	-	-
chr15:78811207-78811359:mpeak_27500|chr15_78799905_78829641_HYKK_NM_+|	5.49176	0.132979	2.13951	0.0621538	0.95044	NA	12.6062	1.34826	0	6.85031	17.3619	7.34355	4.20206	1.34826	0	6.85031	5.78729	2.20307	251.417	-1.17718	-1.41891	0.241735	HYKK	chr15:78811382:+	chr15_78518945_+;chr15_78519032_+
chr12:122468624-122468696:mpeak_20370|chr12_122459791_122496997_BCL7A_NM_+|	640.777	-1.23627	2.22	-0.556878	NA	NA	131.945	177.521	4776.59	223.016	151.916	118.231	26.0528	18.8756	1981.88	19.0286	23.8726	40.3895	250.939	3.36641	4.60491	-1.2385	BCL7A	chr12:122468687:+	chr12_122030781_+
chr8:67509667-67509788:mpeak_75115|chr8_67477060_67525484_MYBL1_NM_-|	11.5049	2.69117	1.97562	1.36219	0.173138	NA	12.6062	11.6849	65.2266	5.32802	2.17023	0.734355	5.88289	17.9768	0	9.89489	3.61705	2.93742	250.123	3.44275	0.536543	2.90621	MYBL1	-	chr8_66597501_-
chr8:133836256-133836317:mpeak_76644|chr8_133787603_133858025_PHF20L1_NM_+|	17.0765	1.75602	2.12672	0.825696	0.408977	0.999521	5.88289	7.19072	125.436	2.28344	2.17023	10.281	5.04247	31.9088	0	3.80573	6.5107	4.40613	249.895	3.2327	1.3276	1.9051	PHF20L1	-	-
chr9:35724617-35724729:mpeak_77718|chr9_35697913_35732392_TLN1_NM_-|	131.757	0.195639	1.99185	0.0982195	0.921758	0.999521	115.977	860.639	45.1569	87.5317	67.2772	60.2171	43.7014	233.249	0	25.1178	24.596	17.6245	245.958	2.24849	2.04013	0.208363	TLN1	-	chr9_35724583_-;chr9_35724615_-;chr9_35724675_-
chr11:10064385-10064453:mpeak_12620|chr11_9802063_10315754_SBF2_NM_-|	23.1576	2.28802	2.99431	0.764121	0.444795	0.999521	0	0	120.418	0	1.44682	0	15.1274	11.6849	120.418	0.761146	2.89364	5.14049	245.367	6.37902	4.06521	2.31382	SBF2	-	-
chr11:117117513-117117646:mpeak_15654|chr11_117103340_117155801_RNF214_NM_+|	31.1277	2.21397	2.25221	0.983023	0.325596	0.999521	3.36165	20.6733	230.802	0.761146	2.17023	2.20307	0.840412	32.8077	70.244	3.80573	0.723411	5.14049	245.29	5.63322	3.42548	2.20774	RNF214	-	chr11_117246859_+
chr11:66417349-66417405:mpeak_14289|chr11_66406087_66433326_RBM4_NM_+|	7.04986	0.433955	1.90856	0.227373	0.820134	NA	10.0849	11.6849	0	12.1783	11.5746	10.281	6.7233	2.2471	0	4.56687	10.8512	4.40613	242.686	-0.644639	-1.14402	0.499377	RBM4	chr11:66417401:+	chr11_66649929_+
chr6:159420318-159420378:mpeak_69384|chr6_159398880_159421198_RSPH3_NM_-|	3.72921	1.29131	2.82192	0.457601	0.647239	NA	0	18.4262	0	5.32802	2.89364	0.734355	0	7.64014	0	6.08916	2.17023	1.46871	241.176	1.04083	-0.34856	1.38939	RSPH3	chr6:159420321:-	chr6_158999291_-
chr13:96519590-96519652:mpeak_22118|chr13_96454066_96705736_UGGT2_NM_-|	7.30219	-1.17137	2.06774	-0.566496	0.571057	NA	8.40412	27.4146	0	8.3726	12.298	10.281	11.7658	3.14594	0	2.28344	0.723411	2.93742	240.205	0.210702	1.32687	-1.11617	UGGT2	-	chr13_95867337_-
chr16:89644252-89644329:mpeak_31208|chr16_89642175_89662891_CPNE7_NM_+|	8.50839	0.866015	3.09703	0.279628	NA	NA	0	51.6833	0	0	2.89364	0	0.840412	42.2455	0	1.52229	1.44682	1.46871	239.908	4.15874	3.27929	0.879448	CPNE7	chr16:89644305:+;chr16:89644348:+	chr16_89577927_+
chr15:52527867-52527967:mpeak_26538|chr15_52486251_52587995_MYO5C_NM_-|	93.7593	-0.523358	2.13012	-0.245694	0.805919	0.999521	211.784	5.39304	15.0523	258.028	233.662	199.01	63.0309	1.79768	0	26.6401	60.0431	50.6705	238.814	-1.57251	-1.08319	-0.489317	MYO5C	chr15:52527867:-	-
chr1:44425103-44425154:mpeak_2263|chr1_44412477_44433257_IPO13_NM_+|	2.30945	0.0369556	2.70975	0.013638	0.989119	NA	0	8.9884	0	2.28344	0.723411	2.93742	0.840412	6.7413	0	2.28344	1.44682	1.46871	237.107	0.596565	0.544298	0.0522668	IPO13	chr1:44425157:+	chr1_43959482_+
chr11:68553180-68553266:mpeak_14457|chr11_68522319_68609399_CPT1A_NM_-|	8.83373	-0.130398	2.18068	-0.0597969	0.952317	NA	19.3295	2.69652	0	15.2229	16.6384	21.2963	8.40412	0.89884	0	10.656	10.1278	0.734355	236.763	-1.27107	-1.20979	-0.0612785	CPT1A	chr11:68553181:-;chr11:68553211:-	chr11_68785744_-
chr17:48822094-48822185:mpeak_34028|chr17_48796925_48827861_LUC7L3_NM_+|	1491.01	1.62044	2.41004	0.672371	NA	NA	15.9678	118.647	12157.2	35.7738	49.9153	76.3729	34.4569	194.599	4997.36	60.8916	73.7879	77.1073	235.187	6.24501	4.62514	1.61987	LUC7L3	chr17:48822175:+	chr17_50744773_+
chr2:201677934-201678007:mpeak_45577|chr2_201676268_201686869_BZW1_NM_+|	796.426	0.574878	1.42017	0.404794	0.685629	0.999521	1253.9	431.443	1409.9	1290.9	795.028	1061.14	845.455	249.877	220.767	445.27	807.326	746.105	235.183	-0.023962	-0.602795	0.578833	BZW1	-	chr2_200813273_+
chr19:337234-337296:mpeak_37017|chr19_306711_344791_MIER2_NM_-|	4.99713	1.43353	3.05444	0.469325	0.638837	NA	11.7658	0	0	3.04458	11.5746	16.8902	0	0	5.01743	0	5.06388	6.6092	234.498	-1.42118	-1.21816	-0.203019	MIER2	chr19:337237:-	chr19_337247_-
chr6:86161801-86162179:mpeak_67655|chr6_86159301_86203558_NT5E_NM_+|	52.6438	3.41821	5.04803	0.677137	NA	NA	0	332.571	0	0	0	1.46871	3.36165	280.887	0	8.3726	5.06388	0	234	7.82297	4.40293	3.42004	NT5E	chr6:86161874:+;chr6:86161974:+;chr6:86162171:+	chr6_85452155_+;chr6_85452206_+;chr6_85452255_+;chr6_85452452_+
chr1:14075924-14075990:mpeak_636|chr1_14026734_14149653_PRDM2_NM_+|	6.9123	4.9179	3.36606	1.46103	0.144008	NA	0	2.69652	60.2092	0.761146	0	0	0	13.4826	0	0	5.06388	0.734355	233.285	6.36887	1.21741	5.15146	PRDM2	-	chr1_13749483_+
chr1:226175589-226175869:mpeak_7909|chr1_226173224_226187066_SDE2_NM_-|	12.6895	-0.306595	2.1382	-0.143389	0.885983	NA	13.4466	67.8624	0	5.32802	6.5107	14.6871	8.40412	26.5158	0	0.761146	3.61705	5.14049	232.844	1.61602	1.87521	-0.259197	SDE2	-	chr1_225987977_-;chr1_225988083_-
chr6:143654526-143654591:mpeak_68861|chr6_143380499_143660775_AIG1_NM_+|	41.9704	1.70938	1.63989	1.04237	0.29724	0.999521	63.8713	9.88724	110.383	29.6847	39.7876	27.1711	52.946	21.1227	5.01743	38.0573	50.6388	55.0766	232.837	0.930076	-0.862293	1.79237	AIG1	-	chr6_143333441_+
chr20:60705578-60705755:mpeak_48794|chr20_60697516_60709218_LSM14B_NM_+|	105.09	2.85042	1.77137	1.60916	0.107581	0.821205	68.0734	28.7629	511.778	35.7738	23.1491	34.5147	97.4878	154.6	10.0349	56.3248	115.746	124.84	232.186	2.70345	-0.179785	2.88324	LSM14B	-	chr20_62130658_+;chr20_62130687_+
chr17:7158169-7158245:mpeak_31809|chr17_7155371_7161906_ELP5_NM_+|	121.355	-2.70316	2.23907	-1.20727	0.227328	0.999521	294.985	5.39304	0	332.621	342.173	284.93	47.0631	84.0415	0	22.0732	23.1491	19.8276	229.113	-1.67584	1.0111	-2.68694	ELP5	chr17:7158170:+;chr17:7158232:+	chr17_7254905_+
chr2:201910198-201910276:mpeak_45615|chr2_201846594_201936392_FAM126B_NM_-|	42.788	4.08501	2.64709	1.54321	NA	NA	0.840412	0.44942	326.133	0	0.723411	4.40613	4.20206	8.53898	130.453	14.4618	16.6384	6.6092	228.656	5.99618	1.92498	4.0712	FAM126B	-	-
chr17:881525-881604:mpeak_31335|chr17_704371_882998_NXN_NM_-|	5.38538	2.37521	3.01787	0.787049	NA	NA	0	30.1111	0	0	1.44682	0	1.68082	24.7181	0	2.28344	1.44682	2.93742	228.124	4.37934	1.98522	2.39412	NXN	chr17:881543:-	chr17_978292_-
chr8:178760-178818:mpeak_73792|chr8_163710_182318_RPL23AP53_NR_-|	1.82281	1.99846	3.30763	0.604197	0.545713	NA	0	8.08956	0	0	0.723411	0.734355	0.840412	6.29188	0	1.52229	0	3.67178	226.843	2.4723	0.457501	2.0148	RPL23AP53	-	-
chr12:253042-253109:mpeak_16242|chr12_176048_283764_IQSEC3_NM_+|	2.13108	-1.32563	4.3115	-0.307465	0.75849	NA	0	16.1791	0	0	0	2.20307	0	7.19072	0	0	0	0	225	2.87655	Inf	-Inf	IQSEC3	-	-
chr4:122732731-122732823:mpeak_59316|chr4_122722471_122737926_EXOSC9_NM_+|	23.1966	0.534972	1.90343	0.281057	0.778667	0.999521	15.9678	67.413	65.2266	10.656	32.5535	15.4215	12.6062	31.4594	0	0.761146	9.40434	16.8902	224.828	1.34177	0.703722	0.638049	EXOSC9	chr4:122732827:+	chr4_121811658_+
chr9:95301734-95301812:mpeak_78460|chr9_95087749_95375300_CENPP_NM_+|	21.9845	0.720055	1.87876	0.383261	0.701526	0.999521	33.6165	4.94362	0	51.7579	27.4896	38.1865	11.7658	5.39304	0	19.7898	23.8726	46.9987	224.725	-1.60667	-2.40153	0.794865	CENPP	-	-
chr12:62946648-62946736:mpeak_18530|chr12_62860596_62986365_MON2_NM_+|	114.227	5.19925	2.23161	2.32981	NA	NA	5.88289	4.4942	837.911	0.761146	2.17023	5.14049	45.3823	49.8856	285.994	31.9681	62.2133	38.9208	222.495	6.71551	1.51825	5.19726	MON2	-	-
chr12:44142239-44142299:mpeak_17463|chr12_44124505_44152620_PUS7L_NM_-|	21.4063	0.706122	1.76174	0.400808	0.688561	0.999521	23.5315	20.2239	0	21.3121	41.2344	46.2644	7.56371	12.1343	0	19.7898	35.4471	29.3742	222.131	-1.31429	-2.10279	0.788506	PUS7L	-	-
chr13:114012990-114013052:mpeak_22409|chr13_113978892_114018463_GRTP1_NM_-|	13.765	-0.787336	1.98884	-0.395878	0.692195	0.999521	19.3295	4.94362	0	16.7452	41.9578	33.046	10.9254	0.44942	5.01743	14.4618	3.61705	14.6871	222.116	-1.91833	-0.999186	-0.919148	GRTP1	chr13:114012999:-	chr13_113358685_-
chr14:35252960-35253068:mpeak_23069|chr14_35222910_35344853_BAZ1A_NM_-|	12.2491	-0.165206	1.93268	-0.0854802	0.93188	NA	5.88289	32.3582	0	17.5063	15.915	30.8429	4.20206	13.0332	0	6.85031	10.8512	9.54662	221.878	-0.748893	-0.660794	-0.0880991	BAZ1A	-	-
chr19:49663126-49663183:mpeak_39686|chr19_49661015_49714750_TRPM4_NM_+|	19.7926	-2.41706	1.8241	-1.32507	0.185149	0.956857	28.574	16.6285	0	48.7133	65.107	30.1086	20.1699	5.39304	5.01743	8.3726	7.95752	1.46871	221.723	-1.67088	0.780823	-2.4517	TRPM4	chr19:49663179:+	chr19_49159921_+
chr19:33459811-33459870:mpeak_38664|chr19_33370284_33462935_CEP89_NM_-|	4.76214	-1.20573	2.33086	-0.517289	0.604954	NA	7.56371	17.078	0	3.80573	4.34046	9.54662	1.68082	9.43782	0	1.52229	2.17023	0	221.625	0.477937	1.5903	-1.11237	CEP89	chr19:33459815:-	chr19_32968910_-
chr17:57134258-57134418:mpeak_34292|chr17_57060282_57184266_TRIM37_NM_-|	24.2386	2.86902	2.13495	1.34384	0.179001	0.956857	28.574	0.44942	45.1569	40.3407	8.68093	7.34355	21.0103	1.34826	0	44.1464	60.7665	33.046	221.184	0.396232	-2.62534	3.02157	TRIM37	-	-
chr1:201337285-201337350:mpeak_7018|chr1_201328383_201346828_TNNT2_NM_-|	3.0084	-0.781383	3.89289	-0.20072	NA	NA	0	23.8193	0	0.761146	0	0.734355	0	10.7861	0	0	0	0	220.833	3.99343	Inf	-Inf	TNNT2	chr1:201337290:-	-
chr12:48093308-48093519:mpeak_17587|chr12_48057373_48099844_RPAP3_NM_-|	20.4963	0.00978407	1.87173	0.00522729	0.995829	0.999521	23.5315	21.1227	0	28.1624	47.7451	45.53	3.36165	17.078	0	12.9395	34.0003	12.484	218.469	-1.44334	-1.53967	0.0963301	RPAP3	chr12:48093312:-;chr12:48093379:-;chr12:48093463:-	chr12_47699513_-;chr12_47699680_-
chr9:139720222-139720286:mpeak_80182|chr9_139702373_139734773_RABL6_NM_+|	92.4028	-0.424841	1.86627	-0.227641	0.819925	0.999521	142.03	84.9404	0	255.745	107.788	116.028	79.8392	71.0083	5.01743	90.5763	85.3625	70.4981	218.43	-1.07921	-0.660922	-0.418291	RABL6	chr9:139720279:+	chr9_136825818_+
chr6:110530270-110530517:mpeak_68189|chr6_110501623_110551156_CDC40_NM_+|	19.7872	3.43086	2.05545	1.66915	0.0950876	0.7798	1.68082	8.08956	110.383	9.13375	2.89364	5.14049	13.4466	23.3698	0	13.7006	21.7023	27.9055	217.573	2.8071	-0.782048	3.58915	CDC40	chr6:110530519:+	chr6_110209098_+;chr6_110209117_+;chr6_110209197_+;chr6_110209314_+
chr14:58924555-58924710:mpeak_23783|chr14_58894102_59014498_KIAA0586_NM_+|	7.18796	0.82484	2.36037	0.349454	0.726748	NA	0	5.39304	35.122	3.80573	3.61705	0	5.88289	17.078	5.01743	2.28344	1.44682	6.6092	217.213	2.44843	1.43615	1.01228	KIAA0586	-	-
chr11:17332361-17332563:mpeak_12845|chr11_17298285_17352958_NUCB2_NM_+|	93.5311	0.247765	1.75815	0.140923	0.88793	0.999521	126.062	61.5705	5.01743	151.468	229.321	250.415	32.7761	26.5158	0	60.1305	102.724	76.3729	216.612	-1.71213	-2.01248	0.300353	NUCB2	-	chr11_17310882_+;chr11_17310900_+;chr11_17310989_+
chr7:127975847-127976116:mpeak_72851|chr7_127950984_127983962_RBM28_NM_-|	72.7966	-0.236283	1.85925	-0.127085	0.898873	0.999521	131.945	208.98	10.0349	121.022	117.193	88.857	22.6911	85.3898	0	17.5063	36.894	33.046	216.48	0.101699	0.305643	-0.203944	RBM28	-	chr7_128335953_-;chr7_128335990_-;chr7_128336023_-
chr8:145676501-145676565:mpeak_76980|chr8_145676153_145691031_CYHR1_NM_-|	39.3561	3.80413	2.61353	1.45555	0.145516	0.907185	0	16.6285	240.837	0	2.17023	10.281	15.9678	103.367	0	31.9681	23.1491	27.9055	215.751	4.37002	0.523431	3.84659	CYHR1	chr8:145676508:-;chr8:145676534:-	chr8_144451127_-;chr8_144451159_-
chr3:122255146-122255202:mpeak_54436|chr3_122247590_122283523_PARP9_NM_-|	6.97029	-0.634355	2.01279	-0.315163	0.752638	NA	20.1699	7.64014	0	15.2229	11.5746	5.87484	8.40412	4.4942	0	2.28344	6.5107	1.46871	215.61	-0.232464	0.329753	-0.562216	PARP9	-	-
chr17:16121470-16121532:mpeak_32156|chr17_16120508_16229113_PIGL_NM_+|	5.49318	0.976113	1.99058	0.490365	0.623876	NA	12.6062	11.6849	0	3.80573	7.95752	3.67178	5.88289	5.39304	0	8.3726	4.34046	2.20307	215.424	0.65422	-0.403628	1.05785	PIGL	chr17:16121528:+	chr17_16218177_+;chr17_16218214_+
chr15:85150059-85150127:mpeak_27707|chr15_85144248_85163832_ZSCAN2_NM_+|	6.7609	-0.0786807	2.30587	-0.0341219	0.97278	NA	6.7233	15.2803	0	13.7006	15.1916	4.40613	1.68082	8.53898	0	5.32802	0	10.281	215.303	-0.597714	-0.61101	0.0132961	ZSCAN2	chr15:85150116:+	chr15_84606884_+
chr3:57678262-57678313:mpeak_53197|chr3_57614072_57678816_DENND6A_NM_-|	15.8096	3.92791	3.2268	1.21728	0.223498	0.999521	0	0	75.2615	0	0	0	0.840412	9.43782	95.3312	1.52229	1.44682	5.87484	213.792	Inf	3.5779	Inf	DENND6A	-	-
chrX:24760132-24760244:mpeak_80694|chrX_24712063_25013921_POLA1_NM_+|	18.0225	3.59396	2.53128	1.41982	0.155661	0.920573	2.52124	1.34826	125.436	3.80573	0	0	21.8507	33.7065	5.01743	0.761146	13.7448	8.07791	213.464	5.08646	1.42342	3.66304	POLA1	-	-
chr1:235359339-235359435:mpeak_8291|chr1_235331967_235491532_ARID4B_NM_-|	88.6106	0.961279	2.71164	0.354501	0.722963	0.999521	0	20.2239	692.405	3.04458	2.89364	2.20307	0	39.0995	296.028	3.04458	1.44682	2.93742	212.644	6.45175	5.49543	0.956316	ARID4B	-	-
chr15:40582955-40583005:mpeak_25872|chr15_40581119_40600174_PLCB2_NM_-|	4.51066	-0.882929	3.62699	-0.243433	0.80767	NA	0	27.4146	0	0	0.723411	0	7.56371	18.4262	0	0	0	0	210.963	5.24399	Inf	-Inf	PLCB2	-	-
chr18:55283044-55283217:mpeak_36755|chr18_55269015_55289177_NARS_NM_-|	294.052	-0.220108	1.79735	-0.122463	0.902532	0.999521	614.341	252.574	35.122	544.98	534.601	475.128	315.155	111.007	5.01743	210.076	223.534	207.088	209.203	-0.785385	-0.571359	-0.214026	NARS	-	chr18_57615816_-;chr18_57615838_-;chr18_57615858_-;chr18_57615932_-
chr2:101182951-101183056:mpeak_43190|chr2_101179417_101192815_PDCL3_NM_+|	71.9277	-0.695109	1.99279	-0.348811	0.727231	0.999521	106.732	125.838	0	151.468	123.703	124.106	81.52	30.1111	0	50.9968	24.596	44.0613	208.338	-0.779726	-0.10013	-0.679597	PDCL3	-	chr2_100566541_+;chr2_100566562_+
chr5:37392082-37392208:mpeak_61079|chr5_37379411_37752587_WDR70_NM_+|	16.7495	3.28936	3.01373	1.09146	NA	NA	1.68082	0.89884	165.575	0	1.44682	0.734355	0	26.9652	0	1.52229	2.17023	0	207.867	6.26854	2.86842	3.40012	WDR70	-	chr5_37392038_+
chr3:53262300-53262380:mpeak_53083|chr3_53259947_53290130_TKT_NR_-mpeak_53083|chr3_53259625_53290130_TKT_NM_-||	68.6227	-0.696501	1.6724	-0.416467	0.677068	0.999521	164.721	75.952	5.01743	163.646	108.512	80.7791	53.7864	54.8292	10.0349	30.4458	41.2344	34.5147	207.071	-0.52257	0.160003	-0.682573	TKT	chr3:53262301:-	chr3_53228329_-
chr12:81671105-81671197:mpeak_19045|chr12_81653439_82153109_PPFIA2_NM_-|	68.6839	2.05241	6.00889	0.341563	NA	NA	0	1.34826	662.301	0	0	0	0	0	160.558	0	0	0	206.67	Inf	Inf	NaN	PPFIA2	-	-
chr14:73563618-73563787:mpeak_24309|chr14_73525220_73586420_RBM25_NM_+|	217.324	1.16959	2.10184	0.556459	0.577897	0.999521	17.6487	48.9868	1590.53	31.9681	24.596	14.6871	21.0103	78.6485	702.44	19.7898	28.213	29.3742	206.603	4.53966	3.3738	1.16585	RBM25	-	chr14_73097072_+
chr3:167742298-167742384:mpeak_55758|chr3_167728206_167813713_GOLIM4_NM_-|	11.9162	1.4302	2.64795	0.540116	0.589117	NA	0	0	40.1394	6.08916	5.06388	5.87484	9.24454	0	30.1046	14.4618	19.5321	12.484	204.017	1.23712	-0.240214	1.47734	GOLIM4	-	chr3_168024575_-
chr2:114219983-114220075:mpeak_43669|chr2_114195267_114253213_CBWD2_NM_+|	21.6944	1.1665	1.81006	0.644453	0.519281	0.999521	42.861	14.8309	0	27.4012	26.0428	27.9055	19.3295	8.9884	0	26.6401	32.5535	33.7803	203.73	-0.495766	-1.71511	1.21935	CBWD2	-	-
chr9:5092123-5092199:mpeak_77135|chr9_4985244_5126683_JAK2_NM_+|	53.674	-2.51337	2.27937	-1.10266	0.270175	0.999521	82.3604	6.7413	0	217.688	138.895	152.746	0	22.0216	0	7.61146	8.68093	7.34355	202.305	-2.51507	-0.102064	-2.41301	JAK2	-	-
chr14:50266186-50266253:mpeak_23336|chr14_50251431_50319791_NEMF_NM_-|	13.2481	2.56117	2.34431	1.0925	0.274612	0.999521	0	0.89884	45.1569	6.08916	7.23411	6.6092	1.68082	21.1227	0	21.3121	21.7023	27.1711	201.967	1.20826	-1.62191	2.83017	NEMF	-	chr14_49799474_-
chr4:89857436-89857491:mpeak_58710|chr4_89649810_89978346_FAM13A_NM_-|	1.68532	0.942539	4.77797	0.197268	0.843618	NA	0	13.4826	0	0	0	0	0	6.7413	0	0	0	0	200	Inf	Inf	NaN	FAM13A	chr4:89857434:-	-
chr20:48914967-48915021:mpeak_48431|chr20_48909256_48929836_LINC01270_NR_+|	2.5174	0.271559	2.66507	0.101895	0.91884	NA	0	1.79768	0	9.13375	2.17023	4.40613	0	0.89884	0	3.04458	3.61705	5.14049	200	-3.12749	-3.71484	0.587353	LINC01270	chr20:48915022:+	chr20_50298484_+
chr11:117778506-117778592:mpeak_15687|chr11_117772980_117800168_TMPRSS13_NM_-|	7.90751	0.72089	2.55005	0.282696	0.77741	NA	10.0849	0	0	4.56687	18.0853	19.8276	5.04247	0	0	19.7898	8.68093	8.81226	200	-2.07457	-2.88631	0.811742	TMPRSS13	chr11:117778512:-	-
chr14:23754303-23754361:mpeak_22721|chr14_23746396_23755309_HOMEZ_NM_-|	7.4055	-1.62471	2.34445	-0.693004	0.488307	NA	27.7336	8.08956	0	7.61146	20.2555	12.484	0	8.9884	0	1.52229	1.44682	0.734355	199.274	-0.171712	1.27919	-1.4509	HOMEZ	chr14:23754309:-	chr14_23285102_-
chr1:23385575-23385670:mpeak_1043|chr1_23345940_23409671_KDM1A_NM_+|	128.789	1.68686	2.13645	0.789563	0.429783	0.999521	26.8932	31.01	953.312	54.0413	23.8726	15.4215	109.254	229.654	0	31.9681	30.3833	39.6552	198.917	3.43752	1.73223	1.70529	KDM1A	-	chr1_23059132_+
chr2:162165063-162165130:mpeak_44665|chr2_162164785_162267812_PSMD14_NM_+|	352.931	-1.14334	1.73812	-0.657806	0.510663	0.999521	590.81	463.352	5.01743	832.693	712.56	606.577	283.219	150.106	100.349	105.038	199.661	185.792	198.469	-1.02262	0.12173	-1.14435	PSMD14	-	chr2_161308602_+
chr3:160150066-160150215:mpeak_55654|chr3_160117091_160151444_SMC4_NM_+|	57.9205	4.01342	2.16346	1.8551	0.0635825	0.689837	1.68082	3.59536	265.924	10.656	6.5107	13.2184	10.9254	115.95	10.0349	54.0413	108.512	93.9975	198.086	3.15792	-0.906009	4.06393	SMC4	chr3:160150222:+	chr3_160432318_+
chr5:124076855-124076908:mpeak_62965|chr5_123973599_124080805_ZNF608_NM_-|	50.4365	-0.0148895	6.00848	-0.00247808	NA	NA	0	0	301.046	0	0	0	0	3.14594	301.046	0	0	0	197.932	Inf	Inf	NaN	ZNF608	-	-
chr19:34710330-34710487:mpeak_38711|chr19_34663351_34718269_LSM14A_NM_+|	304.776	-1.01028	1.48241	-0.681511	0.495548	0.999521	227.752	139.77	702.44	777.13	383.408	474.393	135.306	75.952	331.15	106.56	183.746	119.7	197.261	-0.611671	0.403733	-1.0154	LSM14A	chr19:34710478:+	-
chr19:53147810-53147873:mpeak_39921|chr19_53118050_53193834_ZNF83_NM_-|	2.3603	3.25547	2.99166	1.08818	0.276514	NA	0	9.88724	0	0.761146	0.723411	0.734355	5.04247	0	0	6.08916	3.61705	1.46871	196.079	2.15572	-1.14806	3.30378	ZNF83	chr19:53147822:-	chr19_52644570_-
chr15:36905918-36906052:mpeak_25782|chr15_36871803_37100524_C15orf41_NM_+|	10.701	0.981583	2.41575	0.406326	0.684503	NA	2.52124	0.44942	75.2615	6.08916	2.89364	4.40613	5.04247	21.5722	0	0.761146	8.68093	0.734355	195.963	2.54672	1.38699	1.15973	C15orf41	-	-
chr5:32588574-32588762:mpeak_60881|chr5_32585604_32601110_SUB1_NM_+|	798.768	1.58635	1.82676	0.868395	0.385178	0.999521	610.98	167.184	1946.76	941.537	609.835	591.89	1137.08	247.181	15.0523	908.808	1295.63	1113.28	194.733	0.346409	-1.24548	1.59188	SUB1	-	chr5_32588578_+
chr11:134080159-134080311:mpeak_16219|chr11_134022947_134094426_NCAPD3_NM_-|	26.0891	-1.20254	1.92482	-0.624758	0.53213	0.999521	52.1056	114.602	5.01743	18.2675	28.213	24.9681	25.2124	33.7065	0	0.761146	4.34046	5.87484	194.307	1.26512	2.42432	-1.15919	NCAPD3	-	chr11_134210307_-
chrX:76855194-76855266:mpeak_81656|chrX_76764107_77041755_ATRX_NM_-|	137.911	2.42885	2.08471	1.16508	0.243988	0.999521	8.40412	21.1227	807.806	19.0286	35.4471	47.7331	13.4466	57.5257	361.255	78.398	104.895	99.8723	193.725	3.03428	0.610148	2.42413	ATRX	chrX:76855201:-	-
chr16:19261339-19261401:mpeak_29067|chr16_19179534_19278201_SYT17_NM_+|	1.82964	0.00625261	3.86387	0.00161822	0.998709	NA	0	13.0332	0	0	0.723411	0.734355	0	6.7413	0	0	0.723411	0	193.333	3.16036	3.22014	-0.0597818	SYT17	chr16:19261400:+	chr16_19250077_+
chr16:2808458-2808557:mpeak_28413|chr16_2802329_2820858_SRRM2_NM_+|	1301.5	-1.11845	1.76399	-0.634047	0.52605	0.999521	452.982	1742.85	6793.6	487.894	648.176	453.832	211.784	528.967	3918.61	92.8598	144.682	141.731	192.933	2.49929	3.61883	-1.11953	SRRM2	-	chr16_2758473_+;chr16_2758508_+
chr22:48922557-48922691:mpeak_51330|chr22_48885271_49145650_FAM19A5_NM_+|	25.0074	4.96215	5.10379	0.972248	0.330927	0.999521	0	0	140.488	0	0	0	0.840412	0	145.505	2.28344	2.89364	8.07791	191.995	Inf	3.46477	Inf	FAM19A5	chr22:48922645:+;chr22:48922719:+	chr22_48526824_+;chr22_48526899_+
chr10:13652442-13652503:mpeak_9098|chr10_13628938_13672259_PRPF18_NM_+|	13.3428	1.60055	2.20863	0.724681	0.468648	0.999521	20.1699	0	0	12.1783	8.68093	7.34355	7.56371	13.4826	0	26.6401	37.6174	26.4368	191.672	-0.483635	-2.10744	1.62381	PRPF18	chr10:13652496:+	chr10_13610493_+
chr2:55470533-55470815:mpeak_41802|chr2_55463956_55496384_MTIF2_NM_-|	45.081	0.402002	1.54018	0.26101	0.794085	0.999521	36.1377	66.0647	10.0349	76.8757	59.3197	83.7165	7.56371	35.9536	15.0523	35.0127	52.0856	63.1546	191.631	-0.970373	-1.35917	0.388795	MTIF2	chr2:55470532:-	chr2_55243499_-
chr6:90371795-90371972:mpeak_67871|chr6_90353912_90529513_MDN1_NM_-|	81.8585	1.03369	2.29755	0.44991	0.652775	0.999521	3.36165	217.519	461.604	12.9395	18.8087	3.67178	5.88289	232.8	0	5.32802	11.5746	8.81226	190.626	4.26816	3.21442	1.05374	MDN1	-	chr6_89662111_-
chr10:54214295-54214996:mpeak_9923|chr10_54211277_54230293_LINC01468_NR_-|	128.712	-0.161691	1.8752	-0.0862258	0.931287	0.999521	160.519	57.5257	15.0523	329.576	339.28	260.696	77.3179	4.94362	0	92.8598	117.916	88.857	188.907	-1.99561	-1.8649	-0.130701	LINC01468	-	-
chr18:47795209-47795502:mpeak_36601|chr18_47794033_47808144_MBD1_NM_-|	12.4736	-2.76387	2.316	-1.19338	0.232721	NA	33.6165	22.471	5.01743	12.9395	36.894	25.7024	0	10.7861	0	1.52229	0	0.734355	188.839	-0.305873	2.25692	-2.56279	MBD1	chr18:47795216:-;chr18:47795262:-;chr18:47795340:-;chr18:47795401:-;chr18:47795448:-	chr18_50268847_-;chr18_50268860_-;chr18_50268974_-;chr18_50269021_-
chr11:116740167-116740346:mpeak_15630|chr11_116716345_116969131_SIK3_NM_-|	25.9306	-1.10771	2.96024	-0.374195	NA	NA	0.840412	5.84246	215.749	0.761146	7.95752	0	1.68082	76.8508	0	0.761146	0.723411	0	188.826	4.67312	5.72517	-1.05205	SIK3	chr11:116740186:-;chr11:116740241:-;chr11:116740292:-	chr11_116869525_-
chr15:50731200-50731357:mpeak_26401|chr15_50716573_50791099_USP8_NM_+|	26.1435	2.32541	2.06503	1.12609	0.260127	0.999521	1.68082	0	35.122	19.0286	11.5746	11.7497	13.4466	10.7861	5.01743	32.7293	96.2136	76.3729	188.732	-0.202644	-2.81133	2.60869	USP8	-	-
chr1:20076557-20076625:mpeak_900|chr1_20009937_20126410_TMCO4_NM_-|	4.18361	0.784918	2.18771	0.358785	0.719756	NA	10.9254	4.94362	0	4.56687	5.06388	3.67178	7.56371	0.89884	0	3.04458	1.44682	8.07791	187.52	0.254509	-0.570741	0.82525	TMCO4	chr1:20076564:-	chr1_19750065_-
chr2:213171189-213171255:mpeak_45977|chr2_212248785_213403352_ERBB4_NM_-|	135.683	19.1765	5.90085	3.24978	NA	NA	0	0	1053.66	0	0	0	0	0	561.952	3.80573	2.17023	6.6092	187.5	Inf	5.48065	Inf	ERBB4	-	-
chr16:8904950-8905039:mpeak_28689|chr16_8891669_8941580_PMM2_NM_+|	92.6456	0.807455	1.41306	0.571424	0.567712	0.999521	146.232	89.884	60.2092	145.379	85.3625	105.747	64.7117	78.6485	15.0523	89.054	136.001	95.4662	187.059	-0.183377	-1.01673	0.833357	PMM2	chr16:8905035:+	chr16_8811143_+
chrX:102509521-102509574:mpeak_81948|chrX_102508945_102510121_TCEAL8_NM_-|	14.9276	1.75984	5.98586	0.293999	0.768759	0.999521	0	85.8392	0	0	0	0	0	51.6833	40.1394	0	0	1.46871	186.967	Inf	5.96623	Inf	TCEAL8	-	-
chrX:122755158-122755442:mpeak_82293|chrX_122735189_122866904_THOC2_NM_-|	152.686	-0.930691	2.12723	-0.437514	0.661739	0.999521	15.1274	127.635	963.347	35.0127	36.1705	33.7803	2.52124	62.4694	526.83	5.32802	14.4682	9.54662	186.899	3.39753	4.33408	-0.936546	THOC2	-	chrX_123621295_-;chrX_123621325_-
chr19:33462368-33462424:mpeak_38666|chr19_33370284_33462935_CEP89_NM_-|	3.14795	1.58164	2.73174	0.578986	0.562599	NA	5.04247	15.7297	0	0	0.723411	1.46871	1.68082	9.43782	0	1.52229	2.17023	0	186.823	3.24425	1.5903	1.65395	CEP89	chr19:33462319:-;chr19:33462370:-	chr19_32971465_-
chr1:154207669-154207749:mpeak_5497|chr1_154192647_154243356_UBAP2L_NM_+|	36.5842	-2.02401	1.72667	-1.1722	0.241116	0.999521	52.946	80.8956	30.1046	83.726	54.9792	59.4828	10.9254	47.6385	0	3.04458	10.1278	5.14049	186.629	-0.273648	1.67716	-1.9508	UBAP2L	-	chr1_154235207_+;chr1_154235245_+
chr10:42973065-42973123:mpeak_9673|chr10_42970938_42989462_LINC00839_NR_+|	12.9559	1.77154	5.48002	0.323272	NA	NA	0	99.7712	0	0.761146	0	0	0	53.481	0	0	0.723411	0.734355	186.555	7.03431	5.19719	1.83711	LINC00839	chr10:42973118:+	chr10_42477670_+
chr1:24842420-24842478:mpeak_1155|chr1_24828840_24861582_RCAN3_NM_+|	5.08593	4.09475	2.82809	1.44789	0.147649	NA	3.36165	27.4146	0	0	0	0	5.04247	9.88724	10.0349	4.56687	0.723411	0	184.92	Inf	2.23846	Inf	RCAN3	-	-
chr10:93713489-93713619:mpeak_10896|chr10_93683735_93788546_BTAF1_NM_+|	5.01333	-0.821549	3.30519	-0.248563	0.803699	NA	0	8.08956	35.122	3.80573	0.723411	0	0	11.6849	0	0	0	0.734355	184.903	3.25411	3.99203	-0.737917	BTAF1	-	-
chr4:76836011-76836116:mpeak_58328|chr4_76832506_76862166_NAAA_NM_-|	6.23873	0.603438	2.52811	0.238691	0.811345	NA	15.9678	0	0	10.656	4.34046	0.734355	15.9678	1.34826	0	7.61146	7.95752	10.281	184.428	0.0215712	-0.578048	0.599619	NAAA	-	chr4_75914926_-
chr5:157240064-157240251:mpeak_64288|chr5_157215000_157286183_CLINT1_NM_-|	144.357	0.0651799	1.43499	0.0454219	0.963771	0.999521	124.381	222.013	200.697	197.898	200.385	165.23	187.412	89.4346	20.0697	91.3375	103.448	129.981	184.258	-0.0426653	-0.129345	0.0866799	CLINT1	-	chr5_157813220_-
chr8:74461755-74461899:mpeak_75241|chr8_74333700_74659943_STAU2_NM_-|	3.44761	1.3592	2.13941	0.635316	0.525223	NA	5.88289	1.34826	0	3.04458	4.34046	4.40613	1.68082	2.2471	0	4.56687	6.5107	7.34355	184.096	-0.705412	-2.22952	1.52411	STAU2	chr8:74461752:-;chr8:74461836:-	chr8_73549519_-;chr8_73549586_-;chr8_73549618_-
chr9:104316959-104317035:mpeak_78791|chr9_104296130_104324527_RNF20_NM_+|	81.4464	3.24957	1.89152	1.71797	0.0858025	0.753053	35.2973	28.7629	391.36	28.1624	29.6598	20.5619	89.9241	75.0531	0	73.8311	106.341	98.4036	184.033	2.53856	-0.755805	3.29437	RNF20	-	chr9_101554709_+
chr16:10837873-10837933:mpeak_28748|chr16_10837642_10862903_NUBP1_NM_+|	101.467	-0.970067	1.98703	-0.488198	0.625409	0.999521	92.4454	137.972	0	267.162	190.257	215.9	66.3926	58.874	0	31.207	81.022	76.3729	183.942	-1.54704	-0.590343	-0.9567	NUBP1	-	-
chr1:8716285-8716505:mpeak_375|chr1_8415180_8877699_RERE_NM_-|	1231.19	-0.382655	2.37664	-0.161007	NA	NA	44.5419	99.7712	9272.21	40.3407	32.5535	56.5454	43.7014	122.692	5007.4	9.89489	10.8512	33.7803	182.004	6.18484	6.56812	-0.383278	RERE	-	chr1_8656217_-;chr1_8656236_-;chr1_8656268_-;chr1_8656289_-
chr8:125601854-125601920:mpeak_76473|chr8_125565933_125740748_MTSS1_NM_-|	183.289	17.3179	5.60836	3.08788	NA	NA	0	0	1043.63	0	0	0	0	15.2803	1133.94	0.761146	0.723411	5.14049	181.623	Inf	7.43851	Inf	MTSS1	-	-
chr3:57850268-57850381:mpeak_53204|chr3_57742982_57913022_SLMAP_NM_+|	52.72	0.1426	1.69372	0.0841933	0.932903	0.999521	31.9357	58.874	225.784	22.8344	28.213	37.4521	12.6062	26.5158	135.471	9.13375	15.915	27.9055	181.333	1.83889	1.72117	0.11772	SLMAP	-	chr3_57864551_+;chr3_57864590_+
chr1:171511036-171511376:mpeak_6261|chr1_171454665_171560725_PRRC2C_NM_+|	135.157	-0.312612	1.78364	-0.175266	0.860871	0.999521	33.6165	209.879	622.161	63.9362	64.3836	63.1546	14.287	274.146	190.662	9.89489	40.511	35.2491	180.686	2.17664	2.4837	-0.30706	PRRC2C	chr1:171511226:+	chr1_171542000_+;chr1_171542046_+;chr1_171542072_+;chr1_171542147_+
chr7:146864965-146865035:mpeak_73445|chr7_145813452_148112508_CNTNAP2_NM_+|	38.4797	2.74624	1.76489	1.55604	0.119699	0.854993	41.1802	22.9204	85.2963	19.7898	29.6598	20.5619	49.5843	5.84246	0	97.4266	54.9792	34.5147	179.693	1.09349	-1.75377	2.84726	CNTNAP2	-	-
chr13:28790111-28790184:mpeak_21106|chr13_28712642_28866518_PAN3_NM_+|	32.8045	4.44744	2.28059	1.95013	0.0511612	0.631541	4.20206	4.4942	205.715	3.80573	0	0.734355	8.40412	21.1227	90.3137	7.61146	31.8301	15.4215	178.913	5.56152	1.12721	4.4343	PAN3	-	-
chr9:99800196-99800338:mpeak_78631|chr9_99795330_99801925_CTSV_NM_-|	8.96389	-1.32398	2.12986	-0.621627	0.534187	NA	18.4891	19.3251	5.01743	10.656	12.298	19.0932	15.1274	0.89884	0	3.04458	3.61705	0	178.172	0.0266624	1.26649	-1.23983	CTSV	chr9:99800200:-	-
chr6:101095089-101095214:mpeak_68025|chr6_100957409_101329248_ASCC3_NM_-|	17.1544	0.17801	1.70836	0.1042	0.917011	0.999521	18.4891	13.932	55.1917	25.879	14.4682	16.8902	15.9678	17.078	0	4.56687	7.23411	16.1558	176.75	0.614185	0.241267	0.372918	ASCC3	-	-
chr19:16296269-16296577:mpeak_38118|chr19_16296211_16301697_FAM32A_NM_+|	661.567	2.23515	1.92352	1.16201	0.24523	0.999521	158.838	105.164	2413.38	446.792	306.726	265.837	842.934	657.052	15.0523	796.158	954.179	976.692	176.721	1.39317	-0.847977	2.24114	FAM32A	chr19:16296328:+	chr19_16185515_+;chr19_16185668_+
chr7:148514965-148515076:mpeak_73468|chr7_148504798_148581441_EZH2_NM_-|	420.529	1.1866	2.5164	0.471545	NA	NA	7.56371	12.1343	3160.98	6.08916	14.4682	8.07791	5.04247	44.0432	1751.08	10.656	15.1916	11.0153	176.688	6.7954	5.60982	1.18558	EZH2	-	-
chr2:55761008-55761104:mpeak_41822|chr2_55746730_55772042_CFAP36_NM_+|	37.0885	-0.108169	1.51359	-0.0714648	0.943028	0.999521	48.7439	46.7397	10.0349	88.2929	64.3836	33.7803	21.8507	13.0332	25.0872	14.4618	43.4046	35.2491	175.949	-0.821346	-0.634755	-0.186592	CFAP36	chr2:55761096:+	chr2_55533937_+;chr2_55533958_+
chr1:193044949-193045176:mpeak_6862|chr1_193028551_193053708_TROVE2_NR_+mpeak_6862|chr1_193028551_193060780_TROVE2_NM_+||	54.6667	2.09299	1.72678	1.21208	0.225482	0.999521	83.2008	20.6733	175.61	41.863	23.8726	34.5147	63.8713	42.2455	0	59.3694	55.7026	55.0766	175.583	1.47916	-0.681142	2.1603	TROVE2	-	chr1_193075870_+;chr1_193075906_+
chr10:11798129-11798468:mpeak_9008|chr10_11784355_11805222_ECHDC3_NM_+|	8.55099	0.307088	2.36286	0.129965	0.896594	NA	14.287	0.44942	0	9.13375	23.8726	27.1711	4.20206	0	0	4.56687	10.8512	8.07791	175.348	-2.02984	-2.48324	0.453407	ECHDC3	chr10:11798202:+;chr10:11798287:+;chr10:11798326:+;chr10:11798413:+	chr10_11756288_+;chr10_11756412_+
chr3:62260369-62260437:mpeak_53302|chr3_62249817_62304622_PTPRG-AS1_NR_-|	10.6101	0.851615	2.46514	0.345462	0.729747	NA	0	16.1791	0	14.4618	17.3619	18.3589	9.24454	0	0	17.5063	20.2555	13.9527	175.013	-1.63305	-2.4839	0.850847	PTPRG-AS1	chr3:62260386:-	chr3_62274712_-
chr15:50578072-50578134:mpeak_26380|chr15_50570981_50647605_GABPB1_NM_-|	13.5488	0.0119437	1.69568	0.00704362	0.99438	0.999521	8.40412	5.84246	20.0697	12.9395	42.6812	21.2963	5.88289	7.19072	0	9.13375	15.1916	13.9527	174.99	-1.16441	-1.54986	0.385454	GABPB1	chr15:50578081:-	chr15_50285870_-;chr15_50285938_-
chr15:61513818-61513874:mpeak_26804|chr15_60789818_61521502_RORA_NM_-|	109.476	15.2454	5.97881	2.54991	NA	NA	0	0	612.126	0	0	0	0	2.69652	697.423	0	0	1.46871	174.863	Inf	8.89691	Inf	RORA	-	-
chr9:101545847-101545905:mpeak_78694|chr9_101498905_101558794_ANKS6_NM_-|	15.2298	-0.74216	1.84875	-0.401439	0.688097	0.999521	24.372	10.3367	0	31.9681	35.4471	27.1711	11.7658	8.08956	0	17.5063	3.61705	12.484	174.808	-1.44634	-0.759254	-0.687084	ANKS6	chr9:101545852:-	chr9_98783573_-
chr22:19992479-19992691:mpeak_50104|chr22_19958266_20004309_ARVCF_NM_-|	5.75668	-0.91536	2.30889	-0.39645	0.691773	NA	20.1699	2.2471	0	5.32802	11.5746	8.81226	9.24454	3.59536	0	3.04458	5.06388	0	174.589	-0.198009	0.663134	-0.861143	ARVCF	chr22:19992554:-;chr22:19992633:-	chr22_20005032_-;chr22_20005111_-
chr14:76232371-76232544:mpeak_24525|chr14_76127550_76420766_TTLL5_NM_+|	20.8764	2.88155	2.16427	1.33142	0.183051	0.956857	1.68082	0	55.1917	4.56687	9.40434	3.67178	26.8932	17.078	5.01743	39.5796	45.5749	41.8582	174.14	1.68864	-1.37446	3.06309	TTLL5	-	chr14_75766101_+
chr15:83826095-83826309:mpeak_27688|chr15_83808027_83876770_HDGFRP3_NM_-|	214.37	0.552258	1.89387	0.291602	0.770591	0.999521	79.8392	29.2123	988.434	160.602	116.469	180.651	54.6268	40.4478	536.865	101.994	156.257	127.043	173.669	1.26166	0.713828	0.547829	HDGFRP3	chr15:83826103:-	chr15_83157483_-
chr2:232323706-232323845:mpeak_46468|chr2_232319978_232329205_NCL_NM_-|	1534.64	0.700624	1.81947	0.385071	0.700185	0.999521	2011.95	1711.39	2573.94	1672.24	1344.1	1366.64	1924.54	1697.91	5.01743	1239.91	1530.01	1338	173.6	0.52282	-0.179443	0.702263	NCL	chr2:232323736:-;chr2:232323774:-	-
chr12:93175720-93175895:mpeak_19184|chr12_93169909_93323107_EEA1_NM_-|	7.08329	0.642933	1.99547	0.322197	0.747304	NA	0	6.29188	10.0349	9.13375	9.40434	2.93742	3.36165	5.84246	5.01743	6.08916	18.8087	8.07791	172.204	-0.395456	-1.21333	0.817872	EEA1	-	-
chr1:85643128-85643419:mpeak_3268|chr1_85624932_85666728_SYDE2_NM_-|	6.57654	-3.5427	2.46576	-1.43675	0.150788	NA	12.6062	0.44942	0	13.7006	18.8087	22.765	0.840412	6.7413	0	2.28344	0.723411	0	172.199	-2.08194	1.33427	-3.41621	SYDE2	-	chr1_85177582_-;chr1_85177661_-
chr2:136268284-136268345:mpeak_44179|chr2_135958010_136288806_ZRANB3_NM_-|	16.4891	-2.75823	2.33997	-1.17875	0.238499	0.999521	36.1377	26.0664	5.01743	73.07	13.7448	27.1711	0	13.0332	0	0	2.89364	0.734355	171.924	-0.761861	1.84494	-2.6068	ZRANB3	-	-
chr10:128821459-128821527:mpeak_12048|chr10_128593977_129249595_DOCK1_NM_+|	10.3709	-2.82364	2.08313	-1.35548	0.175265	NA	20.1699	1.79768	5.01743	41.1019	23.1491	17.6245	4.20206	6.29188	0	0	2.89364	2.20307	171.432	-1.60127	1.04192	-2.64319	DOCK1	-	chr10_127023208_+
chr1:235409732-235409826:mpeak_8295|chr1_235331967_235491532_ARID4B_NM_-|	100.834	1.37405	2.52911	0.543294	0.586928	0.999521	2.52124	29.6617	827.876	2.28344	2.17023	2.93742	0	39.0995	296.028	3.04458	1.44682	2.93742	171.091	6.8625	5.49543	1.36707	ARID4B	-	-
chr9:79934536-79934592:mpeak_78150|chr9_79792360_80030871_VPS13A_NM_+|	16.4076	2.87532	2.66589	1.07856	0.280785	0.999521	0	8.53898	105.366	0.761146	2.17023	0	4.20206	62.4694	0	6.85031	5.06388	1.46871	170.845	5.28011	2.31668	2.96343	VPS13A	-	-
chr1:154145562-154145730:mpeak_5483|chr1_154130197_154155725_TPM3_NR_-mpeak_5483|chr1_154131524_154164611_TPM3_NM_-||	45.1379	0.279215	1.65357	0.168856	0.86591	0.999521	48.7439	21.5722	10.0349	123.306	54.2558	62.4202	37.8186	4.4942	5.01743	50.2356	71.6177	52.1392	169.767	-1.57854	-1.87819	0.299656	TPM3	-	chr1_154173176_-
chr17:16049706-16049867:mpeak_32152|chr17_15935797_16118874_NCOR1_NM_-|	150.348	2.08072	2.08286	0.998974	0.317807	0.999521	26.0528	6.7413	908.155	34.2516	13.7448	39.6552	27.7336	77.3002	451.569	45.6687	96.937	76.3729	169.052	3.42427	1.34586	2.07841	NCOR1	-	-
chr7:5399020-5399081:mpeak_69840|chr7_5347943_5463177_TNRC18_NM_-mpeak_69840|chr7_5347943_5463177_TNRC18_NM_-||	17.6295	-0.7452	1.70931	-0.435967	0.662861	0.999521	36.1377	43.5937	10.0349	16.7452	9.40434	25.7024	11.7658	11.2355	30.1046	0.761146	5.78729	10.281	169.033	0.791775	1.65789	-0.866111	TNRC18	-	chr7_5359398_-
chr13:95768034-95768090:mpeak_22083|chr13_95673936_95953700_ABCC4_NM_-|	4.52048	2.21573	3.47276	0.638032	0.523453	NA	0	23.8193	0	0	0	0	1.68082	26.5158	0	0.761146	0	1.46871	168.951	Inf	3.6605	Inf	ABCC4	chr13:95768031:-	-
chr14:35249319-35249527:mpeak_23067|chr14_35222910_35344853_BAZ1A_NM_-|	10.6936	-0.310698	1.89822	-0.163679	0.869984	NA	8.40412	20.6733	0	15.9841	9.40434	29.3742	4.20206	13.0332	0	6.85031	10.8512	9.54662	168.709	-0.913291	-0.660794	-0.252497	BAZ1A	chr14:35249293:-;chr14:35249322:-	chr14_34780088_-;chr14_34780185_-;chr14_34780258_-
chr15:75668057-75668224:mpeak_27378|chr15_75664550_75748124_SIN3A_NM_-|	73.1109	-0.0592521	2.02635	-0.0292409	0.976672	0.999521	4.20206	56.1775	456.586	14.4618	6.5107	12.484	10.0849	66.9636	230.802	3.04458	9.40434	6.6092	167.928	3.94971	4.01375	-0.0640413	SIN3A	-	chr15_75375800_-
chr1:68657870-68657935:mpeak_2996|chr1_68564436_68698284_WLS_NM_-|	3.23535	-1.17314	4.14386	-0.283102	NA	NA	0	23.3698	0	1.52229	0	0	0	13.932	0	0	0	0	167.742	3.94033	Inf	-Inf	WLS	chr1:68657878:-	chr1_68192187_-
chr21:22881252-22881385:mpeak_49090|chr21_22370632_22910166_NCAM2_NM_+|	26.1949	0.730744	2.64298	0.276485	NA	NA	43.7014	0	0	57.0859	31.8301	33.046	26.0528	0	0	40.3407	46.2983	35.9834	167.742	-1.48068	-2.23471	0.754035	NCAM2	chr21:22881377:+	chr21_21509036_+
chr7:94876798-94876849:mpeak_71992|chr7_94536948_94919402_PPP1R9A_NM_+|	56.7415	4.22279	3.12354	1.35192	0.1764	0.95561	0	0	215.749	2.28344	0	0	13.4466	1.79768	371.29	32.7293	30.3833	13.2184	167.449	6.56201	2.34026	4.22175	PPP1R9A	-	-
chr1:113149291-113149358:mpeak_4189|chr1_113068733_113162040_ST7L_NM_-|	16.5207	-2.9253	2.71623	-1.07697	0.281494	0.999521	47.9035	7.64014	0	38.8184	52.0856	30.1086	0	16.6285	0	0	5.06388	0	167.013	-1.12346	1.71535	-2.83881	ST7L	chr1:113149302:-	chr1_112606681_-
chr17:2235458-2235646:mpeak_31478|chr17_2227668_2240678_TSR1_NM_-|	158.164	0.534017	1.99606	0.267536	0.789056	0.999521	289.102	309.65	0	130.156	85.3625	114.559	151.274	377.513	10.0349	126.35	149.023	154.949	166.684	0.859153	0.324392	0.53476	TSR1	chr17:2235572:-	chr17_2332259_-
chr15:44105173-44105315:mpeak_26187|chr15_44097474_44116951_MFAP1_NM_-|	14.1386	0.673703	1.64199	0.410298	0.681587	0.999521	32.7761	15.2803	35.122	9.13375	13.0214	8.81226	12.6062	20.6733	0	8.3726	5.78729	8.07791	166.626	1.42546	0.58162	0.843838	MFAP1	-	chr15_43813066_-
chr21:34022599-34022659:mpeak_49266|chr21_34004111_34100351_SYNJ1_NM_-|	7.3516	-0.561494	2.77249	-0.202524	0.839507	NA	0	2.2471	40.1394	0.761146	12.298	1.46871	0	5.39304	20.0697	0	2.17023	3.67178	166.465	1.54479	2.12385	-0.579066	SYNJ1	-	-
chr16:70724816-70724874:mpeak_30572|chr16_70721993_70835061_VAC14_NM_-|	5.73603	-0.171968	2.36791	-0.0726245	0.942105	NA	0	17.5274	0	4.56687	5.78729	4.40613	6.7233	14.3814	0	4.56687	9.40434	1.46871	166.099	0.247889	0.450901	-0.203012	VAC14	chr16:70724788:-;chr16:70724818:-	chr16_70690905_-
chrX:48341262-48341404:mpeak_81006|chrX_48334408_48344123_FTSJ1_NM_+|	24.9984	0.415191	2.00087	0.207506	0.835615	0.999521	26.0528	92.5805	0	20.5509	31.1067	8.81226	30.2548	41.3466	0	9.89489	18.0853	21.2963	165.686	0.972221	0.539091	0.43313	FTSJ1	chrX:48341268:+;chrX:48341314:+;chrX:48341342:+;chrX:48341406:+	chrX_48482918_+;chrX_48482951_+
chr7:73774501-73774561:mpeak_71398|chr7_73703804_73818166_CLIP2_NM_+|	14.0875	2.55246	5.68873	0.448686	0.653658	0.999521	0	0	75.2615	0	0	0	0	85.8392	5.01743	0.761146	2.17023	0	165.671	Inf	4.95394	Inf	CLIP2	-	-
chr16:547394-547458:mpeak_28181|chr16_475667_570725_RAB11FIP3_NM_+|	9.93609	-0.81439	2.07653	-0.392188	0.694919	NA	39.4994	3.59536	0	9.13375	13.7448	13.9527	5.88289	20.2239	0	2.28344	6.5107	4.40613	165.071	0.226579	0.983858	-0.757278	RAB11FIP3	chr16:547448:+	chr16_497445_+
chr1:94667347-94667426:mpeak_3604|chr1_94640305_94703307_ARHGAP29_NM_-|	9.30123	-1.41922	2.7097	-0.523755	0.600449	NA	0	64.7165	5.01743	7.61146	5.78729	5.14049	0	21.1227	0	0.761146	0.723411	0.734355	165.068	1.91128	3.25087	-1.33959	ARHGAP29	-	chr1_94201793_-
chr20:10019541-10019635:mpeak_47214|chr20_10015646_10036149_ANKEF1_NM_+|	7.8964	-1.99553	1.91632	-1.04133	0.297721	NA	5.04247	9.88724	0	12.9395	28.213	19.8276	4.20206	4.94362	0	5.32802	2.17023	2.20307	163.243	-2.03015	-0.0850902	-1.94506	ANKEF1	chr20:10019620:+	chr20_10038985_+
chr13:48660457-48660595:mpeak_21605|chr13_48651447_48669277_MED4_NM_-|	78.3233	-0.336916	1.51609	-0.222227	0.824137	0.999521	109.254	100.221	140.488	63.9362	91.8732	94.7318	49.5843	155.05	10.0349	50.9968	30.3833	43.327	163.024	0.482151	0.783572	-0.301421	MED4	-	chr13_48086365_-;chr13_48086416_-
chrX:41533928-41533980:mpeak_80865|chrX_41379849_41782287_CASK_NM_-|	208.778	4.49922	2.97001	1.51488	NA	NA	2.52124	0	1284.46	0.761146	0.723411	0	21.8507	25.1675	1138.96	5.32802	9.40434	16.1558	162.775	9.75975	5.26288	4.49687	CASK	-	-
chrX:76909576-76909697:mpeak_81662|chrX_76764107_77041755_ATRX_NM_-|	125.145	2.46207	2.12574	1.15822	0.246774	0.999521	6.7233	8.53898	687.388	31.9681	26.7662	24.9681	13.4466	57.5257	361.255	78.398	104.895	99.8723	162.565	3.06947	0.610148	2.45932	ATRX	-	chrX_77654124_-
chr4:7671681-7671740:mpeak_57214|chr4_7194373_7741926_SORCS2_NM_+|	1.94593	-0.3742	3.79702	-0.0985511	0.921495	NA	0	11.6849	0	2.28344	0.723411	0	0	7.19072	0	0	0	1.46871	162.5	1.95832	2.29159	-0.333262	SORCS2	chr4:7671737:+	-
chr6:111136204-111136284:mpeak_68200|chr6_110935869_111137088_CDK19_NM_-|	267.186	2.31121	2.38142	0.970515	NA	NA	6.7233	8.9884	1806.27	25.1178	18.0853	20.5619	35.2973	11.2355	1078.75	60.1305	52.0856	82.9821	161.914	4.8366	2.52727	2.30933	CDK19	chr6:111136212:-	-
chr1:151745952-151746027:mpeak_5359|chr1_151744462_151763010_TDRKH_NM_-|	8.11569	-3.77164	2.40134	-1.57064	0.116266	NA	9.24454	9.88724	0	20.5509	22.4257	20.5619	10.9254	0.89884	0	0	2.89364	0	161.802	-1.73166	2.03078	-3.76245	TDRKH	chr1:151745970:-	chr1_151773482_-
chr19:50879737-50879836:mpeak_39806|chr19_50879679_50885712_NR1H2_NM_+mpeak_39806|chr19_50879679_50885712_NR1H2_NM_+||	38.5422	0.731441	1.88085	0.388889	0.697358	0.999521	42.861	49.8856	0	78.398	18.8087	55.0766	24.372	33.2571	0	57.8471	53.5324	48.4674	160.937	-0.715391	-1.47182	0.756432	NR1H2	-	-
chr11:68574638-68574700:mpeak_14458|chr11_68522319_68609399_CPT1A_NM_-|	5.83673	0.501361	2.18184	0.229788	0.818256	NA	5.04247	9.88724	0	5.32802	8.68093	10.281	8.40412	0.89884	0	10.656	10.1278	0.734355	160.483	-0.702172	-1.20979	0.50762	CPT1A	chr11:68574648:-	chr11_68807180_-
chrX:122761538-122761656:mpeak_82298|chrX_122735189_122866904_THOC2_NM_-|	106.177	0.445975	2.46915	0.180619	0.856666	0.999521	0	22.9204	607.109	8.3726	8.68093	5.87484	2.52124	62.4694	526.83	5.32802	14.4682	9.54662	159.684	4.78021	4.33408	0.446134	THOC2	-	-
chr8:25230148-25230243:mpeak_74203|chr8_25042286_25268709_DOCK5_NM_+|	21.3518	-0.52255	1.90215	-0.274716	0.783535	0.999521	45.3823	13.0332	0	51.7579	26.0428	33.7803	29.4144	7.19072	0	19.0286	16.6384	13.9527	159.583	-0.93367	-0.43887	-0.4948	DOCK5	-	-
chr5:34938961-34939121:mpeak_60955|chr5_34929697_34954657_DNAJC21_NM_+|	54.9304	0.796419	1.49351	0.533254	0.593858	0.999521	36.1377	23.8193	65.2266	90.5763	59.3197	60.2171	52.946	20.6733	5.01743	76.8757	84.6391	83.7165	159.192	-0.747121	-1.64087	0.893747	DNAJC21	-	chr5_34938907_+;chr5_34938940_+;chr5_34938993_+
chr6:76599800-76599991:mpeak_67474|chr6_76458892_76624529_MYO6_NM_+|	109.532	-0.0574822	2.02498	-0.0283866	0.977354	0.999521	260.528	57.0763	0	108.083	155.533	101.341	239.518	55.7281	5.01743	107.322	128.044	96.2005	158.663	-0.200497	-0.143068	-0.0574285	MYO6	chr6:76599983:+	chr6_75890107_+;chr6_75890156_+;chr6_75890255_+
chr3:195997283-195997423:mpeak_56584|chr3_195965765_196014584_PCYT1A_NM_-|	25.9878	-4.02287	2.07823	-1.93572	0.052902	0.643403	23.5315	38.6501	0	116.455	48.4685	37.4521	4.20206	35.0548	0	0.761146	4.34046	2.93742	158.397	-1.70248	2.28785	-3.99033	PCYT1A	-	chr3_196270500_-
chr18:77227942-77228006:mpeak_36982|chr18_77155771_77287527_NFATC1_NM_+|	8.03191	-0.50408	2.28429	-0.220673	0.825347	NA	0	18.8756	0	6.08916	10.1278	12.484	11.7658	12.1343	0	2.28344	9.40434	13.2184	157.954	-0.604574	-0.0594861	-0.545087	NFATC1	chr18:77227995:+	chr18_79467993_+
chr17:57164382-57164524:mpeak_34299|chr17_57060282_57184266_TRIM37_NM_-|	23.8962	0.0156491	2.35552	0.00664361	0.994699	0.999521	17.6487	0	0	69.2643	8.68093	30.8429	21.0103	1.34826	0	44.1464	60.7665	33.046	157.869	-2.62389	-2.62534	0.00144895	TRIM37	-	-
chr1:100585942-100585992:mpeak_3715|chr1_100550990_100598651_SASS6_NM_-|	1.69658	-1.82663	3.76317	-0.485396	0.627396	NA	0	7.64014	0	2.28344	0	0	2.52124	7.19072	0	0	0.723411	0	157.335	1.74239	3.74687	-2.00448	SASS6	-	chr1_100120398_-
chr15:52246719-52246783:mpeak_26501|chr15_52230457_52263998_LEO1_NM_-|	29.8127	3.58143	2.13354	1.67863	0.0932234	0.775285	5.88289	0.44942	165.575	3.04458	2.89364	2.93742	15.1274	13.932	80.2789	29.6847	15.915	22.0307	157.225	4.27564	0.693056	3.58258	LEO1	-	-
chr11:18585192-18585254:mpeak_12923|chr11_18554034_18610293_UEVLD_NM_-|	5.48352	0.336416	2.30092	0.14621	0.883756	NA	16.8082	0.44942	0	3.04458	6.5107	11.0153	10.0849	0.89884	0	5.32802	5.78729	5.87484	157.119	-0.253347	-0.629323	0.375976	UEVLD	chr11:18585199:-	-
chr16:19548761-19548915:mpeak_29081|chr16_19535178_19562517_CCP110_NM_+|	36.2666	3.75787	2.09664	1.79233	0.0730799	0.723007	0	2.69652	90.3137	6.85031	7.23411	2.93742	18.4891	50.335	20.0697	74.5923	88.9795	72.7012	156.946	2.45	-1.4103	3.8603	CCP110	chr16:19548909:+	-
chr9:74586452-74586540:mpeak_78052|chr9_74526422_74587607_C9orf85_NM_+|	8.85103	3.61108	2.3412	1.54241	0.122975	NA	0.840412	5.39304	50.1743	0	2.89364	0.734355	4.20206	19.7745	0	7.61146	6.5107	8.07791	156.842	3.95865	0.11106	3.84759	C9orf85	-	-
chr7:77200371-77200472:mpeak_71555|chr7_77166772_77268535_PTPN12_NM_+|	312.649	-0.49587	2.06872	-0.239699	0.810564	0.999521	32.7761	124.489	1831.36	98.9489	106.341	135.856	17.6487	86.2886	1164.04	41.1019	59.3197	53.6079	156.834	2.54331	3.04125	-0.497943	PTPN12	-	chr7_77571079_+;chr7_77571134_+
chr12:101748599-101748899:mpeak_19430|chr12_101673904_101779745_UTP20_NM_+|	17.9034	-1.44374	2.21779	-0.650981	0.515059	0.999521	0	53.0315	0	7.61146	11.5746	16.8902	8.40412	57.9752	35.122	3.04458	7.23411	13.9527	156.741	0.555804	2.06655	-1.51074	UTP20	chr12:101748922:+	chr12_101355143_+
chr10:92679917-92680011:mpeak_10856|chr10_92672733_92681032_ANKRD1_NM_-|	16.3403	-13.7635	5.98473	-2.29978	NA	NA	0	118.647	0	0.761146	0.723411	0	0	75.952	0	0	0	0	156.213	6.3205	Inf	-Inf	ANKRD1	-	chr10_90920196_-
chr1:154144497-154144565:mpeak_5482|chr1_154130197_154155725_TPM3_NR_-mpeak_5482|chr1_154131524_154164611_TPM3_NM_-||	35.0085	0.309289	1.77033	0.174707	0.86131	0.999521	23.5315	25.6169	0	71.5477	32.5535	45.53	37.8186	4.4942	5.01743	50.2356	71.6177	52.1392	155.763	-1.60619	-1.87819	0.272	TPM3	-	-
chr3:196215489-196215560:mpeak_56610|chr3_196199643_196230639_RNF168_NM_-|	19.213	-0.670863	1.91913	-0.349566	0.726665	0.999521	15.9678	52.1327	0	28.1624	38.3408	17.6245	16.8082	26.9652	0	6.08916	11.5746	16.8902	155.575	-0.304914	0.341207	-0.646121	RNF168	-	chr3_196488642_-
chr1:179981055-179981187:mpeak_6541|chr1_179923907_180080131_CEP350_NM_+|	14.9993	2.15789	2.36304	0.913182	0.361147	0.999521	0	7.19072	65.2266	5.32802	0.723411	0.734355	0.840412	44.0432	25.0872	4.56687	12.298	13.9527	155.245	3.41575	1.183	2.23275	CEP350	-	chr1_180012015_+
chr14:50262501-50262656:mpeak_23334|chr14_50251431_50319791_NEMF_NM_-|	17.2754	0.406117	1.91277	0.212319	0.831858	0.999521	15.1274	20.2239	0	21.3121	23.8726	33.7803	1.68082	21.1227	0	21.3121	21.7023	27.1711	155.025	-1.15945	-1.62191	0.462466	NEMF	-	chr14_49795833_-
chr17:74221886-74222001:mpeak_35176|chr17_74141434_74236390_RNF157_NM_-|	77.3641	4.19922	2.50378	1.67715	0.0935125	0.775285	0.840412	7.64014	526.83	1.52229	2.17023	0	6.7233	27.864	311.081	16.7452	14.4682	12.484	154.863	7.17963	2.98377	4.19586	RNF157	-	-
chr5:93987413-93987559:mpeak_62340|chr5_93954390_94030535_ANKRD32_NM_+|	5.98088	-2.953	2.3158	-1.27516	0.202254	NA	9.24454	12.1343	0	19.0286	3.61705	11.0153	1.68082	12.1343	0	0	1.44682	1.46871	154.749	-0.654893	2.24442	-2.89931	ANKRD32	-	chr5_94651843_+
chr20:13763655-13763882:mpeak_47264|chr20_13695814_13765579_ESF1_NM_-|	14.3021	1.49784	2.38279	0.628607	0.529606	0.999521	0	4.04478	70.244	7.61146	5.06388	4.40613	0	22.9204	25.0872	5.32802	16.6384	10.281	154.744	2.12071	0.574077	1.54664	ESF1	-	-
chr14:69745990-69746040:mpeak_24190|chr14_69726680_69818747_GALNT16_NM_+|	25.5158	3.80368	3.3616	1.13151	0.25784	0.999521	0	0	100.349	0	0	0	2.52124	26.5158	165.575	7.61146	3.61705	0	154.69	Inf	4.11536	Inf	GALNT16	-	-
chrX:24722500-24722582:mpeak_80689|chrX_24712063_25013921_POLA1_NM_+|	15.3779	-0.728302	2.14031	-0.340278	0.733647	0.999521	1.68082	60.6717	0	9.13375	14.4682	15.4215	21.8507	33.7065	5.01743	0.761146	13.7448	8.07791	154.403	0.676107	1.42342	-0.747315	POLA1	chrX:24722587:+	chrX_24704439_+;chrX_24704463_+
chr6:135507084-135507162:mpeak_68665|chr6_135502452_135539001_MYB_NM_+|	12.6418	0.81704	1.85813	0.439711	0.660146	NA	3.36165	1.34826	35.122	19.7898	9.40434	8.07791	11.7658	4.04478	10.0349	13.7006	13.0214	22.0307	154.116	0.0958315	-0.915573	1.0114	MYB	-	-
chr15:44105440-44105565:mpeak_26188|chr15_44097474_44116951_MFAP1_NM_-|	13.7257	0.487372	1.64288	0.296657	0.766729	0.999521	23.5315	22.9204	30.1046	14.4618	12.298	5.87484	12.6062	20.6733	0	8.3726	5.78729	8.07791	153.361	1.23012	0.58162	0.648504	MFAP1	-	chr15_43813315_-
chr14:58988348-58988519:mpeak_23785|chr14_58894102_59014498_KIAA0586_NM_+|	8.87962	-0.813632	1.76464	-0.461076	0.644744	NA	14.287	8.53898	20.0697	12.1783	3.61705	9.54662	5.88289	17.078	5.01743	2.28344	1.44682	6.6092	153.318	0.759303	1.43615	-0.676844	KIAA0586	-	chr14_58521751_+
chr1:9664952-9665024:mpeak_410|chr1_9648931_9673043_TMEM201_NM_+|	17.9854	-1.73733	2.11376	-0.821916	0.411125	0.999521	13.4466	97.5241	5.01743	12.9395	18.8087	11.7497	4.20206	46.2903	0	0.761146	3.61705	1.46871	153.143	1.41496	3.11032	-1.69536	TMEM201	chr1:9665007:+	chr1_9604948_+
chr10:102134194-102134245:mpeak_11292|chr10_102133332_102147793_OLMALINC_NR_+|	4.14292	2.94701	2.46642	1.19485	0.232145	NA	0	6.7413	5.01743	0.761146	3.61705	0	5.88289	1.79768	0	9.89489	10.1278	5.87484	153.097	1.42532	-1.75353	3.17885	OLMALINC	-	chr10_100374497_+
chr22:31858956-31859131:mpeak_50589|chr22_31836107_31885874_EIF4ENIF1_NM_-|	27.7663	-1.01362	1.51085	-0.670894	0.502288	0.999521	32.7761	41.3466	55.1917	35.7738	36.1705	18.3589	6.7233	37.7513	40.1394	12.9395	8.68093	7.34355	152.829	0.518033	1.54664	-1.0286	EIF4ENIF1	-	-
chr6:107829732-107829934:mpeak_68102|chr6_107811316_107979410_SOBP_NM_+|	3.52438	5.66262	2.97427	1.90387	0.0569277	NA	0	7.19072	0	0	0	0	6.7233	2.69652	0	5.32802	13.7448	6.6092	152.672	Inf	-1.44699	Inf	SOBP	chr6:107829855:+;chr6:107829934:+	chr6_107508647_+;chr6_107508730_+
chr6:69486547-69486623:mpeak_67276|chr6_69345631_70098594_ADGRB3_NM_+|	42.23	0.610785	6.00908	0.101644	NA	NA	0	0	306.063	0	0	0	0	0	200.697	0	0	0	152.5	Inf	Inf	NaN	ADGRB3	-	-
chr8:22430799-22430858:mpeak_74122|chr8_22409250_22432179_SORBS3_NM_+|	3.56561	0.129429	2.4944	0.051888	0.958618	NA	0	10.7861	0	4.56687	2.17023	0.734355	3.36165	10.7861	0	3.80573	2.17023	4.40613	152.478	0.529708	0.446473	0.0832349	SORBS3	chr8:22430851:+	chr8_22573337_+
chr17:27000384-27000539:mpeak_32579|chr17_26989301_27028456_SUPT6H_NM_+|	139.15	1.76679	1.81727	0.97222	0.330941	0.999521	39.4994	97.5241	521.813	78.398	32.5535	65.3576	152.115	276.393	5.01743	156.796	110.682	133.653	151.972	1.90181	0.112044	1.78977	SUPT6H	-	chr17_28673495_+
chr4:41648136-41648293:mpeak_57813|chr4_41361623_41699176_LIMCH1_NM_+|	18.7458	-0.0939827	1.94878	-0.0482264	0.961536	0.999521	16.8082	73.7049	10.0349	11.4172	11.5746	13.2184	8.40412	37.7513	20.0697	5.32802	16.6384	0	151.828	1.47342	1.59208	-0.118658	LIMCH1	-	chr4_41646217_+
chr9:135759643-135759760:mpeak_79972|chr9_135754289_135765343_C9orf9_NM_+|	4.55136	1.37547	2.08659	0.659195	0.509771	NA	10.0849	2.69652	0	3.04458	4.34046	4.40613	1.68082	6.7413	0	11.4172	5.06388	5.14049	151.761	0.116345	-1.36021	1.47656	C9orf9	chr9:135759695:+;chr9:135759733:+;chr9:135759761:+	chr9_132884307_+;chr9_132884373_+
chr1:31810066-31810132:mpeak_1550|chr1_31769828_31836878_ZCCHC17_NM_+|	49.3345	2.29632	1.74301	1.31745	0.187689	0.956857	8.40412	30.1111	180.627	22.0732	13.0214	16.8902	26.0528	103.367	15.0523	57.0859	73.0645	46.2644	151.686	2.07571	-0.288185	2.36389	ZCCHC17	-	-
chr19:53223270-53223325:mpeak_39933|chr19_53210117_53238307_ZNF611_NM_-|	8.94651	3.27687	2.40023	1.36523	0.172179	NA	0	12.5838	0	0	2.17023	3.67178	6.7233	9.88724	0	22.8344	29.6598	19.8276	151.515	1.10703	-2.12233	3.22936	ZNF611	chr19:53223269:-	chr19_52720018_-
chr18:29992708-29992977:mpeak_36331|chr18_29848731_30050447_GAREM_NM_-|	73.818	-2.86139	1.81053	-1.58041	0.114012	0.838297	146.232	74.6037	10.0349	210.076	119.363	132.918	4.20206	17.9768	130.453	14.4618	13.7448	11.7497	151.259	-1.00193	1.93356	-2.93549	GAREM	chr18:29992953:-	-
chr20:13747512-13747574:mpeak_47262|chr20_13695814_13765579_ESF1_NM_-|	13.1554	3.20248	2.6478	1.20949	0.226476	0.999521	0	2.2471	70.244	0	1.44682	3.67178	0	22.9204	25.0872	5.32802	16.6384	10.281	150.999	3.82398	0.574077	3.24991	ESF1	-	chr20_13766872_-
chr4:76837710-76837790:mpeak_58329|chr4_76832506_76862166_NAAA_NM_-|	9.36842	-0.242642	2.24873	-0.107902	0.914074	NA	21.0103	0	5.01743	22.0732	9.40434	11.7497	15.9678	1.34826	0	7.61146	7.95752	10.281	150.31	-0.731891	-0.578048	-0.153843	NAAA	chr4:76837721:-	chr4_75916566_-
chr4:156294287-156294612:mpeak_59873|chr4_156269057_156298122_MAP9_NM_-|	6.97895	1.326	2.16594	0.612206	0.540401	NA	4.20206	0	0	3.80573	7.23411	5.87484	3.36165	2.2471	0	21.3121	18.0853	17.6245	149.84	-2.00911	-3.34576	1.33666	MAP9	-	chr4_155373440_-
chr10:74322574-74322822:mpeak_10381|chr10_74128113_74385949_MICU1_NM_-|	75.481	0.0911272	1.83997	0.0495264	0.9605	0.999521	146.232	119.995	5.01743	136.245	94.7668	115.294	68.0734	53.0315	0	39.5796	64.3836	63.1546	149.316	-0.352453	-0.464607	0.112153	MICU1	-	-
chr14:67000282-67000334:mpeak_24045|chr14_66974124_67647520_GPHN_NM_+|	156.075	19.0094	3.28956	5.77871	NA	NA	0	0	607.109	0	0	0	36.9781	25.6169	1159.03	11.4172	19.5321	13.2184	149.091	Inf	4.78966	Inf	GPHN	-	-
chr1:155648899-155649047:mpeak_5648|chr1_155630724_155658823_YY1AP1_NM_-|	121.55	0.0932609	2.13487	0.0436845	0.965156	0.999521	273.134	120.445	0	279.34	88.2561	98.4036	92.4454	171.678	0	101.232	136.725	96.9349	149.013	-0.243679	-0.342481	0.0988025	YY1AP1	-	chr1_155679202_-
chr4:87895123-87895182:mpeak_58637|chr4_87856153_88056731_AFF1_NM_+|	2.56778	1.41172	3.16347	0.446257	0.655412	NA	0	10.3367	0	0	0	1.46871	0.840412	13.0332	0	0.761146	2.17023	2.20307	149.012	2.81515	1.43406	1.38109	AFF1	chr4:87895183:+	chr4_86974030_+
chr17:29096678-29096744:mpeak_32726|chr17_29036625_29096889_SUZ12P1_NR_+|	3.35042	0.38444	2.69403	0.142701	0.886527	NA	0	7.19072	0	0	7.23411	1.46871	3.36165	6.29188	0	2.28344	7.23411	5.14049	148.976	-0.275347	-0.602563	0.327216	SUZ12P1	chr17:29096747:+	chr17_30769726_+
chr3:136221465-136221600:mpeak_54958|chr3_136057119_136471245_STAG1_NM_-|	100.893	0.288384	2.21249	0.130343	NA	NA	15.1274	13.4826	622.161	22.0732	21.7023	23.4994	6.7233	9.43782	421.464	11.4172	28.9364	14.6871	148.705	3.27401	2.99112	0.282885	STAG1	-	chr3_136502697_-
chr16:6920560-6920617:mpeak_28658|chr16_6069131_7760624_RBFOX1_NM_+|	102.857	7.26681	6.0073	1.20966	NA	NA	0	0	737.562	0	0	0	0	0	496.726	0	0	0	148.485	Inf	Inf	NaN	RBFOX1	-	-
chr1:114128060-114128277:mpeak_4232|chr1_113933474_114224833_MAGI3_NM_+|	31.1848	3.92055	2.8792	1.36168	0.173299	0.946336	0	0	100.349	0	0	2.20307	10.0849	17.078	175.61	26.6401	22.4257	19.8276	148.464	5.50936	1.55743	3.95194	MAGI3	-	-
chr18:57013145-57013264:mpeak_36799|chr18_56998361_57026508_LMAN1_NM_-|	168.814	-0.244094	2.01973	-0.120854	0.903806	0.999521	273.134	168.532	0	207.032	196.768	210.026	294.985	146.511	5.01743	90.5763	248.13	185.058	148.372	-0.47487	-0.230214	-0.244656	LMAN1	-	chr18_59346000_-
chr9:139331767-139331832:mpeak_80144|chr9_139324259_139334256_INPP5E_NM_-|	2.82423	4.32661	2.92268	1.48036	0.138778	NA	3.36165	12.5838	0	0	1.44682	0	0	5.39304	0	3.80573	2.89364	4.40613	147.833	3.46218	-1.0421	4.50429	INPP5E	chr9:139331777:-	chr9_136437321_-
chr10:38264975-38265031:mpeak_9634|chr10_38242123_38265453_ZNF25_NM_-|	2.46739	1.22965	2.59195	0.474413	0.635205	NA	0.840412	3.14594	0	3.80573	5.06388	2.93742	0	1.34826	0	0.761146	2.89364	8.81226	147.833	-1.5665	-3.20895	1.64245	ZNF25	chr10:38264975:-	chr10_37976039_-
chr7:138921772-138921854:mpeak_73226|chr7_138916230_138982532_UBN2_NM_+|	37.16	5.39937	3.05454	1.76766	0.0771181	0.728501	0	0	135.471	0	0	0	10.0849	39.0995	225.784	12.1783	13.0214	10.281	147.803	Inf	2.95416	Inf	UBN2	-	-
chr12:44177479-44177538:mpeak_17466|chr12_44152746_44180482_IRAK4_NM_+|	14.3545	-0.310503	1.77903	-0.174535	0.861445	0.999521	11.7658	4.04478	0	35.7738	31.8301	25.7024	7.56371	3.14594	0	17.5063	21.7023	13.2184	147.629	-2.56109	-2.2914	-0.269687	IRAK4	-	-
chr3:138340277-138340392:mpeak_55019|chr3_138327541_138351771_FAIM_NM_+|	29.9673	-1.03807	1.71862	-0.604013	0.545835	0.999521	36.1377	16.6285	5.01743	79.9203	54.2558	63.1546	31.0953	3.14594	5.01743	11.4172	34.7237	19.0932	147.187	-1.77188	-0.732618	-1.03926	FAIM	-	chr3_138621535_+
chr3:184024134-184024247:mpeak_56208|chr3_184016885_184026495_PSMD2_NM_+|	859.304	-0.445215	1.67101	-0.266434	0.789905	0.999521	1121.11	1768.47	65.2266	1312.98	1249.33	1000.19	759.733	1116.81	135.471	686.553	574.388	521.392	146.858	-0.269827	0.174871	-0.444698	PSMD2	chr3:184024216:+	chr3_184306411_+;chr3_184306433_+;chr3_184306462_+
chr13:95735957-95736007:mpeak_22081|chr13_95673936_95953700_ABCC4_NM_-|	4.25831	2.02049	3.47651	0.581185	0.561116	NA	0	20.6733	0	0	0	0	1.68082	26.5158	0	0.761146	0	1.46871	146.637	Inf	3.6605	Inf	ABCC4	-	-
chr19:16965589-16965869:mpeak_38165|chr19_16940197_16989307_SIN3B_NM_+|	69.2222	-2.93048	2.13545	-1.3723	NA	NA	109.254	114.153	0	83.726	126.597	122.637	4.20206	220.216	5.01743	10.656	20.2555	13.9527	146.058	-0.57568	2.35445	-2.93013	SIN3B	chr19:16965640:+;chr19:16965668:+;chr19:16965709:+;chr19:16965735:+;chr19:16965779:+;chr19:16965861:+	chr19_16854856_+;chr19_16854897_+;chr19_16854919_+;chr19_16854967_+;chr19_16854998_+;chr19_16855049_+
chr11:63916085-63916148:mpeak_13975|chr11_63766159_63933585_MACROD1_NM_-|	32.7969	0.904013	1.65197	0.547232	0.584219	0.999521	45.3823	52.5821	5.01743	16.7452	46.2983	33.046	46.2227	19.3251	5.01743	54.0413	40.511	29.3742	145.939	0.0999393	-0.812457	0.912397	MACROD1	chr11:63916090:-	-
chr8:146221723-146221909:mpeak_77039|chr8_146203939_146228285_ZNF252P_NR_-|	36.8722	0.295868	1.786	0.165659	0.868425	0.999521	47.9035	4.94362	0	54.8025	53.5324	40.3895	20.1699	29.2123	5.01743	54.8025	81.022	50.6705	145.719	-1.49274	-1.77747	0.284724	ZNF252P	chr8:146221765:-	chr8_144996338_-;chr8_144996434_-
chr5:158466297-158466359:mpeak_64315|chr5_158126150_158526788_EBF1_NM_-|	102.208	5.66515	6.00729	0.943047	NA	NA	0	0	516.795	0	0	0	0	2.2471	707.458	0	0	0	145.637	Inf	Inf	NaN	EBF1	-	-
chr5:145878094-145878254:mpeak_63952|chr5_145826872_145890003_TCERG1_NM_+|	208.69	1.17376	2.1353	0.549691	NA	NA	27.7336	16.1791	1364.74	15.9841	10.1278	24.2337	63.0309	41.3466	862.998	13.7006	27.4896	36.7178	145.616	4.80631	3.63423	1.17208	TCERG1	-	chr5_146498589_+
chr10:22218002-22218124:mpeak_9289|chr10_22045684_22292650_DNAJC1_NM_-|	45.3233	3.57162	2.19169	1.62962	0.103182	0.802255	9.24454	0	110.383	9.89489	2.89364	8.81226	89.9241	28.3135	5.01743	76.8757	107.788	94.7318	145.586	2.4694	-1.18066	3.65006	DNAJC1	-	-
chr5:86670649-86670707:mpeak_62238|chr5_86564069_86686616_RASA1_NM_+|	142.795	-2.58219	2.64857	-0.974936	NA	NA	16.8082	4.4942	973.381	9.89489	2.89364	19.0932	3.36165	7.64014	672.336	0	2.17023	1.46871	145.563	4.96343	7.55293	-2.5895	RASA1	-	-
chr13:45827047-45827114:mpeak_21502|chr13_45694630_45857576_GTF2F2_NM_+|	66.3883	0.220018	1.67142	0.131636	0.895272	0.999521	96.6474	103.816	10.0349	70.7865	108.512	64.6233	37.8186	102.018	5.01743	66.2197	67.2772	63.8889	145.317	-0.212608	-0.446416	0.233807	GTF2F2	-	-
chr19:33406235-33406299:mpeak_38658|chr19_33370284_33462935_CEP89_NM_-|	3.44315	-1.01629	2.46714	-0.41193	0.68039	NA	7.56371	8.53898	0	3.80573	0.723411	5.87484	1.68082	9.43782	0	1.52229	2.17023	0	144.826	0.630166	1.5903	-0.960136	CEP89	-	-
chr3:39125633-39125696:mpeak_52386|chr3_39093476_39136138_WDR48_NM_+|	14.0218	2.6976	1.90954	1.4127	0.157745	0.924427	0.840412	10.3367	45.1569	7.61146	2.89364	1.46871	16.8082	17.078	5.01743	13.7006	25.3194	22.0307	144.804	2.23412	-0.650102	2.88422	WDR48	-	chr3_39084191_+
chr5:93964510-93964626:mpeak_62338|chr5_93954390_94030535_ANKRD32_NM_+|	4.64085	-0.811633	2.31766	-0.350195	0.726192	NA	5.88289	4.04478	20.0697	4.56687	0.723411	3.67178	1.68082	12.1343	0	0	1.44682	1.46871	144.756	1.74293	2.24442	-0.501487	ANKRD32	chr5:93964516:+	chr5_94628855_+
chr10:128795064-128795151:mpeak_12046|chr10_128593977_129249595_DOCK1_NM_+|	9.61579	-3.58626	2.27644	-1.57538	0.115169	NA	14.287	0.89884	0	50.9968	10.8512	22.765	4.20206	6.29188	0	0	2.89364	2.20307	144.711	-2.47815	1.04192	-3.52007	DOCK1	-	-
chr3:143236724-143236822:mpeak_55224|chr3_142985771_143567373_SLC9A9_NM_-|	6.25152	-4.69376	2.7075	-1.73361	0.0829868	NA	14.287	9.88724	5.01743	27.4012	4.34046	7.34355	0	6.7413	0	0	0	0	144.343	-0.421068	Inf	-Inf	SLC9A9	-	-
chr7:87265248-87265320:mpeak_71788|chr7_87257728_87459199_RUNDC3B_NM_+|	3.47655	4.10323	3.52249	1.16487	0.244073	NA	0	13.4826	0	0	0	0	2.52124	16.1791	0	0	0.723411	8.81226	144.196	Inf	0.971659	Inf	RUNDC3B	-	-
chrX:46584829-46584980:mpeak_80938|chrX_46466638_46618607_SLC9A7_NM_-|	81.7059	2.59279	1.99552	1.29931	0.193838	0.959197	21.8507	11.2355	336.168	57.8471	28.9364	26.4368	96.6474	74.6037	0	104.277	99.8307	122.637	143.748	1.70548	-0.932052	2.63753	SLC9A7	-	-
chr6:73393430-73393561:mpeak_67345|chr6_73331570_73904174_KCNQ5_NM_+|	3.4204	-0.404703	4.00877	-0.100954	0.919587	NA	0	17.078	0	0	0	0	0	13.932	10.0349	0	0	0	142.513	Inf	Inf	NaN	KCNQ5	-	chr6_72683829_+
chr12:27455063-27455121:mpeak_17174|chr12_27397077_27475260_STK38L_NM_+|	6.31308	3.78531	2.39136	1.58291	0.113442	NA	7.56371	2.69652	15.0523	0	4.34046	0	4.20206	7.64014	0	1.52229	20.2555	12.484	142.499	2.54393	-1.53267	4.07659	STK38L	chr12:27455121:+	chr12_27302158_+
chr1:85639949-85640048:mpeak_3266|chr1_85624932_85666728_SYDE2_NM_-|	4.18638	-2.86455	2.40216	-1.19249	0.23307	NA	7.56371	3.14594	0	10.656	5.06388	13.2184	0.840412	6.7413	0	2.28344	0.723411	0	141.256	-1.43407	1.33427	-2.76834	SYDE2	chr1:85639953:-;chr1:85639992:-	chr1_85174256_-
chr2:74729462-74729545:mpeak_42547|chr2_74725445_74730443_LBX2_NM_-|	1.96373	-1.43051	3.94724	-0.362408	0.717047	NA	0	9.43782	0	0.761146	0	0	1.68082	11.6849	0	0	0	0	141.224	3.63221	Inf	-Inf	LBX2	chr2:74729468:-;chr2:74729493:-	chr2_74502342_-;chr2_74502383_-
chr4:143347501-143347689:mpeak_59636|chr4_142950067_143767604_INPP4B_NM_-|	24.5531	-0.631534	2.32667	-0.271432	0.786058	0.999521	48.7439	0	0	28.9235	24.596	38.9208	26.8932	42.2455	0	26.6401	22.4257	35.2491	141.003	-0.9233	-0.286295	-0.637006	INPP4B	chr4:143347634:-	chr4_142426483_-
chr1:224492766-224492871:mpeak_7814|chr1_224415372_224517891_NVL_NM_-|	8.2518	-0.291993	1.86882	-0.156245	0.87584	NA	11.7658	9.43782	0	12.1783	14.4682	12.484	3.36165	11.6849	0	8.3726	10.1278	5.14049	140.92	-0.883988	-0.651847	-0.232141	NVL	-	-
chr7:64049350-64049405:mpeak_71113|chr7_64035072_64074876_LOC100128885_NR_+|	1.98494	0.472649	4.66062	0.101413	0.919222	NA	0	13.932	0	0	0	0	0	9.88724	0	0	0	0	140.909	Inf	Inf	NaN	LOC100128885	chr7:64049402:+	-
chr14:92620691-92620796:mpeak_24887|chr14_92588297_92627995_CPSF2_NM_+|	103.634	2.10796	1.68336	1.25223	0.210485	0.984848	48.7439	44.4926	265.924	38.8184	59.3197	52.8736	135.306	115.501	5.01743	130.156	187.363	160.089	140.393	1.24997	-0.900674	2.15064	CPSF2	-	chr14_92154404_+
chr15:42972585-42972637:mpeak_26094|chr15_42867856_43011670_STARD9_NM_+|	2.2657	-4.30565	3.6339	-1.18486	0.236073	NA	0	9.43782	0	0.761146	2.17023	8.07791	0	6.7413	0	0	0	0	140	-0.222196	Inf	-Inf	STARD9	-	-
chr1:220160473-220160673:mpeak_7668|chr1_220142298_220220000_EPRS_NM_-|	72.2788	-0.155284	1.67839	-0.0925194	0.926285	0.999521	88.2433	181.566	90.3137	68.5031	75.2347	88.857	78.1583	94.3782	0	22.8344	52.0856	27.1711	139.148	0.63067	0.757045	-0.126375	EPRS	-	-
chr2:152139371-152139463:mpeak_44438|chr2_152127389_152146430_NMI_NM_-|	23.5732	-1.27956	1.84593	-0.69318	0.488197	0.999521	17.6487	37.3019	0	75.3534	27.4896	41.8582	12.6062	26.9652	0	15.2229	13.7448	14.6871	138.864	-1.39687	-0.141684	-1.25519	NMI	-	-
chr18:47797352-47797592:mpeak_36602|chr18_47794033_47808144_MBD1_NM_-|	5.17419	-1.71967	2.68757	-0.63986	0.522263	NA	2.52124	27.4146	0	4.56687	9.40434	5.14049	0	10.7861	0	1.52229	0	0.734355	138.771	0.647418	2.25692	-1.6095	MBD1	chr18:47797353:-;chr18:47797412:-;chr18:47797534:-	chr18_50271043_-;chr18_50271078_-;chr18_50271172_-
chr11:117150619-117150691:mpeak_15657|chr11_117103340_117155801_RNF214_NM_+|	17.6137	2.00322	2.69564	0.743132	0.457402	0.999521	0	10.3367	85.2963	0	2.17023	0	0.840412	32.8077	70.244	3.80573	0.723411	5.14049	138.075	5.46159	3.42548	2.0361	RNF214	-	-
chr11:64003741-64003803:mpeak_13997|chr11_64002055_64005827_VEGFB_NM_+|	19.8802	3.15397	2.76133	1.14219	0.253373	0.999521	0	3.14594	90.3137	9.89489	0	0	21.0103	46.7397	0	26.6401	20.2555	20.5619	137.948	3.23959	0.00624064	3.23335	VEGFB	-	chr11_64236302_+;chr11_64236320_+
chr14:58740631-58740712:mpeak_23769|chr14_58734111_58764855_PSMA3-AS1_NR_-|	35.0449	0.571018	1.64536	0.347048	0.728556	0.999521	61.3501	22.0216	5.01743	39.5796	47.7451	40.3895	13.4466	45.8408	5.01743	54.8025	39.0642	46.2644	137.453	-0.530979	-1.12378	0.592798	PSMA3-AS1	chr14:58740650:-	chr14_58273913_-
chr8:97273726-97273776:mpeak_75716|chr8_97251913_97273841_MTERF3_NM_-|	2.20301	3.94073	3.25577	1.21038	0.226132	NA	0	7.19072	0	0	0	0	4.20206	6.29188	0	0.761146	5.78729	2.20307	137.045	Inf	0.261955	Inf	MTERF3	-	-
chr7:74917116-74917176:mpeak_71449|chr7_74703024_74988276_PMS2P5_NR_-|	3.7141	0.207659	2.14788	0.0966809	0.92298	NA	2.52124	2.69652	0	8.3726	5.06388	5.87484	3.36165	0.44942	0	4.56687	5.78729	5.87484	136.911	-1.88795	-2.09031	0.202361	PMS2P5	-	-
chr1:19423677-19423772:mpeak_828|chr1_19401390_19536746_UBR4_NM_-|	529.314	0.132334	2.16488	0.0611276	0.951258	0.999521	279.017	3270.43	351.22	158.318	91.1498	108.685	156.317	1745.1	0	55.5636	89.7029	46.2644	136.764	3.44507	3.31142	0.133651	UBR4	-	chr1_19097195_-
chr4:76678638-76678711:mpeak_58317|chr4_76649705_76734358_USO1_NM_+|	18.3031	2.29295	1.78474	1.28475	0.19888	0.966122	4.20206	6.29188	50.1743	6.85031	5.78729	9.54662	9.24454	30.1111	5.01743	17.5063	48.4685	26.4368	136.723	1.45141	-1.05839	2.5098	USO1	-	chr4_75757564_+
chr5:74842830-74842949:mpeak_61947|chr5_74807656_74893758_POLK_NM_+|	16.4506	0.135	2.08821	0.0646486	0.948454	0.999521	5.04247	39.9984	0	22.8344	28.9364	13.9527	4.20206	28.7629	0	15.9841	32.5535	5.14049	136.633	-0.545177	-0.703399	0.158223	POLK	-	-
chr6:133593963-133594118:mpeak_68639|chr6_133562494_133849862_EYA4_NM_+|	18.1522	-1.20416	2.33168	-0.516433	0.605552	0.999521	13.4466	2.69652	110.383	16.7452	2.17023	5.14049	0	26.9652	35.122	0.761146	0.723411	3.67178	135.859	2.39498	3.58988	-1.1949	EYA4	-	-
chr6:73751834-73751923:mpeak_67358|chr6_73331570_73904174_KCNQ5_NM_+|	3.3455	-0.479413	4.01393	-0.119438	0.904929	NA	0	16.1791	0	0	0	0	0	13.932	10.0349	0	0	0	135.012	Inf	Inf	NaN	KCNQ5	chr6:73751910:+	chr6_73042186_+
chr1:22047519-22047621:mpeak_993|chr1_22005932_22109688_USP48_NM_-|	82.3099	-2.03541	1.80085	-1.13025	0.25837	0.999521	72.2755	195.498	0	146.14	104.171	82.9821	41.1802	66.5141	190.662	37.2961	26.7662	24.2337	134.624	-0.315781	1.75662	-2.0724	USP48	-	-
chr14:67807143-67807206:mpeak_24077|chr14_67805479_67826720_ATP6V1D_NM_-|	181.362	1.31633	1.63901	0.803122	0.421904	0.999521	126.062	186.06	311.081	152.99	125.873	98.4036	192.454	267.854	5.01743	208.554	311.067	190.932	133.928	0.724113	-0.6107	1.33481	ATP6V1D	chr14:67807154:-	chr14_67340437_-
chr10:46240256-46240322:mpeak_9775|chr10_46222647_46287708_FAM21C_NM_+|	13.9745	1.12691	1.89241	0.59549	0.551516	0.999521	14.287	61.1211	5.01743	6.85031	7.95752	7.34355	5.88289	34.1559	0	6.85031	8.68093	9.54662	133.913	1.86026	0.674985	1.18527	FAM21C	-	-
chr19:53150033-53150151:mpeak_39922|chr19_53118050_53193834_ZNF83_NM_-|	1.97351	4.20926	3.45689	1.21764	0.22336	NA	0	6.7413	0	0	0.723411	0	5.04247	0	0	6.08916	3.61705	1.46871	133.69	3.22014	-1.14806	4.3682	ZNF83	-	-
chr11:47446708-47446804:mpeak_13449|chr11_47440496_47448024_PSMC3_NM_-|	564.67	0.464768	1.67255	0.277879	0.781105	0.999521	677.372	258.866	331.15	1140.96	537.494	560.313	495.003	443.577	10.0349	925.553	795.752	599.968	133.604	-0.820844	-1.29102	0.470178	PSMC3	chr11:47446730:-	-
chr3:157841646-157841774:mpeak_55579|chr3_157827840_158261971_RSRC1_NM_+|	10.0011	-0.0635262	2.03677	-0.0311897	0.975118	NA	22.6911	1.34826	0	13.7006	20.9789	10.281	12.6062	5.39304	0	6.85031	18.0853	8.07791	133.558	-0.903258	-0.875121	-0.028137	RSRC1	-	-
chr5:59125149-59125202:mpeak_61447|chr5_58270907_59783925_PDE4D_NM_-|	50.2492	-0.583949	6.00859	-0.0971857	NA	NA	0	0	240.837	0	0	0.734355	0	9.43782	351.22	0.761146	0	0	133.554	8.35736	8.88824	-0.530882	PDE4D	-	-
chr3:142089322-142089433:mpeak_55162|chr3_142030655_142166904_XRN1_NM_-|	17.7965	-0.842098	2.08439	-0.404001	0.686212	0.999521	27.7336	48.0879	0	17.5063	16.6384	22.765	16.8082	39.9984	0	0.761146	15.915	7.34355	133.473	0.41393	1.24184	-0.827908	XRN1	-	chr3_142370518_-;chr3_142370533_-
chr14:35005372-35005489:mpeak_23035|chr14_34985792_35008943_EAPP_NM_-|	38.2198	3.04168	2.1921	1.38756	0.16527	0.93771	6.7233	2.69652	190.662	17.5063	10.8512	1.46871	36.1377	63.8176	0	30.4458	53.5324	44.7957	133.448	2.74594	-0.365484	3.11142	EAPP	-	chr14_34536166_-
chr7:22611402-22611637:mpeak_70237|chr7_22602955_22611703_LOC100506178_NR_+|	1.31081	0.383688	5.00008	0.0767364	0.938833	NA	0	8.9884	0	0	0	0	0	6.7413	0	0	0	0	133.333	Inf	Inf	NaN	LOC100506178	-	-
chr2:242162781-242162831:mpeak_46754|chr2_242127923_242163511_ANO7_NM_+|	1.83513	0.395883	4.71458	0.08397	0.93308	NA	0	12.5838	0	0	0	0	0	9.43782	0	0	0	0	133.333	Inf	Inf	NaN	ANO7	chr2:242162832:+	chr2_241223396_+;chr2_241223416_+
chr1:2123336-2123434:mpeak_170|chr1_2121220_2126214_FAAP20_NR_-mpeak_170|chr1_2116952_2144159_FAAP20_NM_-||	13.8506	0.0321381	1.7208	0.0186762	0.985099	0.999521	4.20206	18.8756	0	12.1783	20.2555	24.2337	8.40412	12.5838	5.01743	16.7452	23.1491	20.5619	133.113	-1.29602	-1.21709	-0.0789373	FAAP20	chr1:2123340:-;chr1:2123383:-	chr1_2191902_-
chr12:81762884-81762969:mpeak_19047|chr12_81653439_82153109_PPFIA2_NM_-|	48.9574	1.41514	6.00919	0.235496	NA	NA	0	0.44942	426.482	0	0	0	0	0	160.558	0	0	0	132.952	Inf	Inf	NaN	PPFIA2	-	-
chr12:99047763-99047816:mpeak_19364|chr12_99039077_99126197_APAF1_NM_+|	3.5159	-1.53752	2.7923	-0.550628	0.581889	NA	8.40412	9.43782	0	0.761146	2.17023	12.484	0	6.7413	0	0	0.723411	1.46871	132.333	0.210899	1.6207	-1.4098	APAF1	chr12:99047816:+	chr12_98654036_+
chr3:124814100-124814270:mpeak_54527|chr3_124802896_124931609_SLC12A8_NM_-|	3.80002	4.29216	3.14721	1.3638	0.172631	NA	0	13.4826	0	0	0	0	4.20206	16.1791	0	3.04458	7.95752	0.734355	132.304	Inf	0.796241	Inf	SLC12A8	chr3:124814214:-	chr3_125095327_-
chr6:30523902-30524007:mpeak_66015|chr6_30514090_30525371_GNL1_NM_-|	197.463	0.351047	1.9792	0.177368	0.859219	0.999521	82.3604	788.732	5.01743	223.777	120.086	79.3104	65.5522	546.495	50.1743	114.172	136.725	157.152	132.299	1.04986	0.698572	0.351291	GNL1	-	chr6_30556144_-;chr6_30556171_-
chr16:70765182-70765291:mpeak_30575|chr16_70721993_70835061_VAC14_NM_-|	4.20639	4.68865	3.04591	1.53932	0.123725	NA	0	13.932	0	0	0	0	6.7233	14.3814	0	4.56687	9.40434	1.46871	132.027	Inf	0.450901	Inf	VAC14	chr16:70765181:-;chr16:70765240:-	chr16_70731279_-;chr16_70731338_-
chr21:47746288-47746446:mpeak_49884|chr21_47744035_47865196_PCNT_NM_+|	37.2989	4.05077	2.62954	1.54049	0.123441	0.860613	0	14.3814	210.732	1.52229	2.17023	0	15.9678	155.05	0	11.4172	24.596	11.7497	131.632	5.9299	1.84019	4.08972	PCNT	-	-
chr1:154148591-154148776:mpeak_5484|chr1_154130197_154155725_TPM3_NR_-mpeak_5484|chr1_154131524_154164611_TPM3_NM_-||	34.5749	0.0505258	1.81445	0.0278464	0.977785	0.999521	23.5315	17.9768	0	94.3821	21.7023	35.9834	37.8186	4.4942	5.01743	50.2356	71.6177	52.1392	131.549	-1.87324	-1.87819	0.00495134	TPM3	-	chr1_154176227_-
chr1:87188292-87188361:mpeak_3309|chr1_87170252_87208810_SH3GLB1_NM_+|	114.473	3.81985	2.51005	1.52182	0.128054	0.870695	9.24454	0	536.865	3.80573	0	8.07791	73.9563	97.9735	451.569	63.9362	65.8304	62.4202	131.382	5.52214	1.69788	3.82427	SH3GLB1	chr1:87188356:+	chr1_86722673_+
chr17:40618436-40618535:mpeak_33343|chr17_40610861_40673044_ATP6V0A1_NM_+|	82.6775	1.61343	1.76023	0.916602	0.359351	0.999521	151.274	72.806	275.959	35.7738	26.0428	30.1086	86.5625	167.634	0	45.6687	68.724	31.5773	131.143	2.44351	0.80027	1.64324	ATP6V0A1	-	-
chr5:145859413-145859484:mpeak_63948|chr5_145826872_145890003_TCERG1_NM_+|	194.783	2.10202	2.23469	0.94063	NA	NA	11.7658	7.19072	1249.34	11.4172	5.78729	6.6092	63.0309	41.3466	862.998	13.7006	27.4896	36.7178	131.107	5.73496	3.63423	2.10073	TCERG1	-	chr5_146479884_+;chr5_146479909_+
chr12:27113618-27113702:mpeak_17144|chr12_27091304_27117528_FGFR1OP2_NM_+|	49.5619	0.564701	1.8608	0.303472	0.76153	0.999521	39.4994	59.3234	0	67.742	69.4474	58.7484	51.2651	24.7181	0	59.3694	88.2561	76.3729	130.059	-0.98748	-1.55974	0.572255	FGFR1OP2	chr12:27113681:+	chr12_26960763_+
chr10:51845244-51845306:mpeak_9871|chr10_51827647_51892565_FAM21A_NM_+|	14.9303	-0.485682	2.04817	-0.23713	0.812556	0.999521	17.6487	62.4694	0	10.656	7.95752	5.14049	12.6062	49.4362	0	3.04458	5.06388	5.14049	129.134	1.75395	2.22738	-0.473423	FAM21A	-	-
chr12:418957-419140:mpeak_16269|chr12_394828_498621_KDM5A_NM_-|	157.523	2.00591	2.11529	0.948289	0.342983	0.999521	27.7336	169.881	842.928	23.5955	28.213	49.2018	42.0206	495.261	0	54.0413	81.022	76.3729	129.112	3.36476	1.34545	2.01931	KDM5A	-	-
chr21:47819510-47819722:mpeak_49895|chr21_47744035_47865196_PCNT_NM_+|	41.6498	0.0237613	2.27324	0.0104526	0.99166	0.999521	26.8932	193.7	0	28.9235	5.06388	26.4368	15.9678	155.05	0	11.4172	24.596	11.7497	128.989	1.86819	1.84019	0.0280046	PCNT	-	chr21_46399683_+;chr21_46399752_+
chr5:80083428-80083502:mpeak_62151|chr5_79950466_80171569_MSH3_NM_+|	19.9974	0.0208298	1.54434	0.0134878	0.989239	0.999521	21.8507	16.6285	25.0872	20.5509	29.6598	18.3589	8.40412	35.9536	5.01743	21.3121	20.2555	16.8902	128.742	-0.109306	-0.243609	0.134304	MSH3	-	-
chr7:74308011-74308137:mpeak_71420|chr7_74306886_74335466_PMS2P5_NR_+|	3.42861	0.410173	2.23806	0.183272	0.854585	NA	0.840412	4.04478	0	4.56687	6.5107	5.14049	3.36165	0.44942	0	4.56687	5.78729	5.87484	128.184	-1.73111	-2.09031	0.359193	PMS2P5	-	-
chr8:56711633-56711788:mpeak_74893|chr8_56685790_56737139_TGS1_NM_+|	7.09779	-3.08858	2.62126	-1.17828	0.238685	NA	10.0849	33.2571	5.01743	4.56687	10.8512	8.07791	0	12.5838	0	0	0	0.734355	128.1	1.04139	4.09894	-3.05755	TGS1	-	-
chr8:67514647-67514753:mpeak_75116|chr8_67477060_67525484_MYBL1_NM_-|	9.88669	-0.302112	1.92757	-0.156732	0.875456	NA	1.68082	13.932	30.1046	12.9395	10.1278	9.54662	5.88289	17.9768	0	9.89489	3.61705	2.93742	127.74	0.48726	0.536543	-0.0492831	MYBL1	-	chr8_66602511_-
chr6:30638807-30639036:mpeak_66069|chr6_30621147_30640830_DHX16_NM_-|	44.1126	-0.517708	1.63224	-0.317177	0.75111	0.999521	55.4672	122.692	5.01743	47.9522	34.7237	48.4674	53.7864	74.6037	15.0523	19.7898	22.4257	29.3742	127.7	0.482088	1.00265	-0.520559	DHX16	-	chr6_30671116_-
chr5:64850616-64850733:mpeak_61555|chr5_64814460_64858995_CENPK_NM_-|	19.0799	-0.869652	1.70681	-0.509518	0.610389	0.999521	33.6165	29.2123	5.01743	46.4299	25.3194	24.9681	25.2124	10.3367	0	9.89489	9.40434	9.54662	127.235	-0.511506	0.301446	-0.812952	CENPK	-	chr5_65554833_-;chr5_65554855_-
chr5:137721680-137721835:mpeak_63489|chr5_137688284_137771308_KDM3B_NM_+|	74.1942	-0.016475	1.49597	-0.0110129	0.991213	0.999521	58.8289	76.8508	255.889	38.0573	24.596	43.327	36.1377	83.1427	190.662	28.9235	28.213	25.7024	126.336	1.88547	1.90362	-0.0181497	KDM3B	-	chr5_138386060_+
chr13:25066660-25066737:mpeak_20996|chr13_24995452_25086948_PARP4_NM_-|	8.02942	-0.0799682	1.8376	-0.0435178	0.965289	NA	7.56371	12.5838	5.01743	21.3121	10.8512	5.14049	8.40412	4.94362	0	4.56687	12.298	3.67178	125.689	-0.567907	-0.621604	0.053697	PARP4	-	-
chr10:70153836-70153906:mpeak_10155|chr10_70101045_70167051_RUFY2_NR_-mpeak_10155|chr10_70105668_70167051_RUFY2_NM_-||	17.4056	-1.03498	1.82287	-0.567776	0.570187	0.999521	32.7761	15.2803	0	25.879	26.0428	35.9834	24.372	13.932	0	8.3726	13.7448	12.484	125.46	-0.87122	0.146662	-1.01788	RUFY2	-	-
chr3:183860044-183860171:mpeak_56173|chr3_183852809_183862671_EIF2B5_NM_+|	146.622	2.29305	1.8074	1.2687	0.204547	0.977323	45.3823	82.2438	441.534	73.07	49.1919	25.7024	153.795	295.269	5.01743	170.497	248.13	169.636	125.343	1.94358	-0.373508	2.31709	EIF2B5	-	-
chr11:17787124-17787177:mpeak_12872|chr11_17757494_17803216_KCNC1_NM_+|	15.0523	0.324716	6.01425	0.0539911	0.956942	0.999521	0	0	100.349	0	0	0	0	0	80.2789	0	0	0	125	Inf	Inf	NaN	KCNC1	-	-
chr7:114563655-114563725:mpeak_72657|chr7_114562208_114655741_MDFIC_NM_+|	1.60402	-2.128	4.48532	-0.474437	0.635188	NA	0	9.43782	0	0	2.17023	0	0	7.64014	0	0	0	0	123.529	2.1206	Inf	-Inf	MDFIC	chr7:114563711:+	-
chr6:28196919-28197033:mpeak_65883|chr6_28193028_28200339_ZSCAN9_NM_+|	3.44193	-4.44356	3.0213	-1.47074	0.141361	NA	0	11.2355	0	2.28344	6.5107	2.20307	1.68082	16.6285	0	0.761146	0	0	122.73	0.0309278	4.58827	-4.55734	ZSCAN9	chr6:28196972:+;chr6:28197034:+	chr6_28229210_+;chr6_28229255_+
chr1:150917717-150917801:mpeak_5225|chr1_150898814_150936722_SETDB1_NM_+|	20.1627	-1.14768	1.85439	-0.618896	0.535985	0.999521	34.4569	19.7745	0	20.5509	51.3622	32.3116	14.287	30.1111	0	12.1783	16.6384	10.281	122.148	-0.942498	0.183414	-1.12591	SETDB1	chr1:150917790:+	chr1_150945325_+
chr12:122967950-122968007:mpeak_20422|chr12_122958822_122985620_ZCCHC8_NM_-|	86.4229	5.54049	3.15952	1.75359	0.0795012	0.732547	0	0	285.994	0	0	0	18.4891	63.3682	622.161	9.89489	18.8087	18.3589	121.869	Inf	3.90297	Inf	ZCCHC8	-	-
chr2:25781055-25781112:mpeak_40856|chr2_25600422_25896516_DTNB_NM_-|	8.98287	0.46282	1.82197	0.254022	0.799479	NA	5.88289	9.43782	0	8.3726	18.8087	2.20307	7.56371	6.29188	5.01743	12.1783	18.0853	13.9527	121.767	-0.939565	-1.22825	0.288689	DTNB	chr2:25781058:-	chr2_25558190_-
chr5:158461612-158461676:mpeak_64314|chr5_158126150_158526788_EBF1_NM_-|	95.1003	4.05207	6.00743	0.674509	NA	NA	0	0	431.499	0	0	0	0	2.2471	707.458	0	0	0	121.6	Inf	Inf	NaN	EBF1	-	-
chr8:128955081-128955251:mpeak_76567|chr8_128902873_129113225_PVT1_NR_+|	7.61432	4.71573	2.49516	1.88995	0.0587648	NA	11.7658	19.7745	0	0	1.44682	0	10.9254	15.2803	0	1.52229	12.298	18.3589	120.357	4.44624	-0.296249	4.74248	PVT1	chr8:128955243:+	chr8_127942996_+
chr16:11984926-11985006:mpeak_28838|chr16_11967028_12010519_GSPT1_NM_-|	691.429	1.26099	1.44773	0.87101	0.383749	0.999521	502.567	215.722	1961.82	434.614	351.578	341.475	924.454	730.307	577.004	767.996	753.794	735.824	120.089	1.24895	-0.0166135	1.26556	GSPT1	-	-
chr22:29939413-29939529:mpeak_50481|chr22_29904509_29949736_THOC5_NM_-|	46.8764	1.22497	1.72554	0.709909	0.47776	0.999521	24.372	6.29188	135.471	36.535	15.915	31.5773	51.2651	77.3002	10.0349	59.3694	60.0431	54.3423	119.866	0.983421	-0.326123	1.30954	THOC5	-	-
chr4:42444904-42444965:mpeak_57858|chr4_42415030_42659122_ATP8A1_NM_-|	28.9412	3.67273	3.16976	1.15868	0.246588	0.999521	0	0	95.3312	0	0	0	8.40412	4.4942	225.784	4.56687	6.5107	2.20307	119.822	Inf	4.1677	Inf	ATP8A1	-	-
chr8:106674150-106674309:mpeak_76071|chr8_106331146_106813274_ZFPM2_NM_+|	103.993	3.92667	6.00732	0.653648	NA	NA	0	0	466.621	0	0	0	0	3.59536	777.702	0	0	0	119.448	Inf	Inf	NaN	ZFPM2	-	-
chr11:6494299-6494350:mpeak_12463|chr11_6470410_6495689_TRIM3_NM_-|	21.4401	1.68683	5.88444	0.28666	0.774373	0.999521	0	0	95.3312	0	0	0	4.20206	0	155.54	0.761146	1.44682	0	119.356	Inf	6.17688	Inf	TRIM3	-	-
chr15:35256428-35256489:mpeak_25757|chr15_35149307_35261995_AQR_NM_-|	98.3529	3.91214	2.3207	1.68576	0.0918426	0.770544	3.36165	13.0332	612.126	5.32802	5.78729	9.54662	59.6693	293.921	0	30.4458	87.5327	59.4828	118.503	4.92692	0.994573	3.93234	AQR	-	-
chr11:880799-880982:mpeak_12305|chr11_869956_915058_CHID1_NM_-|	727.694	-1.526	2.16402	-0.705169	0.480705	0.999521	1201.79	1137.93	20.0697	1502.5	1526.4	1188.19	191.614	1137.93	0	379.051	266.939	179.917	118.326	-0.837587	0.686883	-1.52447	CHID1	chr11:880819:-;chr11:880874:-	chr11_880830_-;chr11_880874_-
chr2:95773922-95774163:mpeak_42937|chr2_95753326_95787754_MRPS5_NM_-|	104.264	0.0492557	2.16771	0.0227225	0.981872	0.999521	82.3604	310.549	0	113.411	92.5966	74.1699	91.6049	240.889	0	47.191	88.9795	109.419	118.17	0.487858	0.43708	0.0507784	MRPS5	chr2:95773920:-	chr2_95108365_-
chr6:155424644-155424695:mpeak_69263|chr6_155411422_155577617_TIAM2_NM_+|	4.15227	1.21812	6.03931	0.201699	NA	NA	0.840412	34.1559	0	0	0	0	0	14.8309	0	0	0	0	117.985	Inf	Inf	NaN	TIAM2	-	-
chr1:43162313-43162625:mpeak_2180|chr1_43148065_43167651_YBX1_NM_+|	579.982	-0.780191	1.57333	-0.495887	0.619974	0.999521	479.875	265.158	1339.65	959.805	648.899	469.987	331.122	139.32	1299.51	216.165	417.408	392.88	117.782	0.00415517	0.786046	-0.781891	YBX1	chr1:43162435:+	chr1_42696765_+;chr1_42696782_+
chr22:20937474-20937538:mpeak_50140|chr22_20861828_20940854_MED15_NM_+|	21.3194	3.19329	2.43035	1.31392	0.188874	0.956857	0	13.4826	95.3312	2.28344	2.17023	1.46871	2.52124	89.884	0	14.4618	18.8087	15.4215	117.757	4.19954	0.924292	3.27525	MED15	-	chr22_20583244_+
chr8:124214791-124214900:mpeak_76352|chr8_124191286_124221665_FAM83A_NM_+|	4.07347	2.63309	2.99065	0.88044	0.378621	NA	0	14.8309	0	0.761146	0	0	5.88289	19.3251	0	2.28344	5.06388	0.734355	117.668	4.28429	1.64115	2.64313	FAM83A	chr8:124214842:+;chr8:124214896:+	chr8_123202614_+;chr8_123202655_+
chr10:29843986-29844042:mpeak_9469|chr10_29747262_30024730_SVIL_NM_-|	10.1518	-0.639429	1.93728	-0.330066	0.74135	NA	21.0103	1.34826	15.0523	8.3726	18.8087	17.6245	17.6487	3.59536	0	3.80573	8.68093	5.87484	117.4	-0.260229	0.210373	-0.470601	SVIL	chr10:29843980:-	-
chrX:80373920-80373985:mpeak_81726|chrX_80370729_80457441_HMGN5_NM_-|	4.99105	1.7426	2.69791	0.645907	0.51834	NA	0	18.4262	0	1.52229	2.89364	2.20307	0	15.7297	0	3.80573	7.23411	8.07791	117.143	1.47707	-0.281421	1.7585	HMGN5	chrX:80373931:-	chrX_81118470_-
chr10:21827758-21827857:mpeak_9270|chr10_21823100_22030867_MLLT10_NM_+|	26.1572	1.06375	5.9833	0.177786	0.858891	0.999521	0	0	115.401	0	0	0	0	1.34826	195.68	0	0.723411	0.734355	117.142	Inf	7.0785	Inf	MLLT10	-	-
chr1:224505429-224505503:mpeak_7815|chr1_224415372_224517891_NVL_NM_-|	5.86469	0.929825	2.00139	0.464589	0.642226	NA	11.7658	5.84246	0	4.56687	2.17023	7.34355	3.36165	11.6849	0	8.3726	10.1278	5.14049	117.025	0.322535	-0.651847	0.974382	NVL	-	chr1_224317727_-
chr2:171906568-171906699:mpeak_44854|chr2_171850466_172087824_TLK1_NM_-|	16.4144	0.980276	2.08004	0.471277	0.637443	0.999521	0	6.7413	50.1743	6.08916	1.44682	10.281	5.88289	37.3019	30.1046	19.0286	12.298	17.6245	116.488	1.67557	0.58226	1.09331	TLK1	-	-
chr8:25346076-25346210:mpeak_74214|chr8_25316512_25364025_CDCA2_NM_+|	34.8388	-0.442099	1.97885	-0.223412	0.823214	0.999521	21.0103	86.738	0	47.9522	40.511	44.7957	38.659	53.9304	0	12.9395	28.9364	42.5926	116.372	-0.306566	0.132433	-0.438998	CDCA2	chr8:25346238:+	-
chr3:141712368-141712429:mpeak_55136|chr3_141671538_141868386_TFDP2_NM_-|	13.8542	1.33624	1.81818	0.734932	0.462381	0.999521	5.04247	8.53898	40.1394	1.52229	10.1278	7.34355	9.24454	31.9088	5.01743	14.4618	9.40434	23.4994	116.353	1.49997	-0.0368558	1.53683	TFDP2	-	-
chr6:149893690-149893748:mpeak_69016|chr6_149887527_149911862_GINM1_NM_+|	12.2459	1.81093	2.66297	0.680043	0.496477	NA	1.68082	0	45.1569	12.9395	0	0.734355	15.1274	25.1675	0	6.85031	23.8726	15.4215	116.237	1.77625	-0.195555	1.97181	GINM1	-	-
chr7:129142618-129142676:mpeak_72931|chr7_129142319_129152087_SMKR1_NM_+|	43.104	-0.7967	2.22241	-0.358485	0.71998	0.999521	63.0309	4.94362	0	146.14	75.2347	39.6552	57.148	1.34826	0	31.9681	41.2344	56.5454	116.203	-1.94115	-1.14929	-0.791855	SMKR1	-	-
chr1:220153423-220153583:mpeak_7665|chr1_220142298_220220000_EPRS_NM_-|	69.4097	-0.551302	1.90205	-0.289847	0.771934	0.999521	112.615	182.464	5.01743	91.3375	86.8093	80.0447	78.1583	94.3782	0	22.8344	52.0856	27.1711	115.955	0.216988	0.757045	-0.540057	EPRS	-	chr1_219980156_-;chr1_219980191_-
chr6:30689597-30689652:mpeak_66081|chr6_30687977_30691715_TUBB_NR_+mpeak_66081|chr6_30687977_30691116_TUBB_NM_+||	4.33746	2.57043	3.05765	0.840657	0.40054	NA	4.20206	15.2803	0	2.28344	2.17023	2.20307	8.40412	0	0	17.5063	0	0	115.909	1.54928	-1.05871	2.60799	TUBB	-	-
chr5:145562046-145562191:mpeak_63927|chr5_145493874_145562294_LARS_NM_-|	133.376	-0.235527	2.2084	-0.106651	0.915066	0.999521	66.3926	362.682	0	258.028	108.512	95.4662	108.413	262.012	0	85.2483	118.639	135.121	115.833	-0.106684	0.127858	-0.234542	LARS	chr5:145562050:-	chr5_146182487_-
chr3:9433291-9433485:mpeak_51545|chr3_9432181_9439174_THUMPD3-AS1_NR_-|	19.8498	0.148059	1.85877	0.0796541	0.936512	0.999521	22.6911	8.53898	0	13.7006	47.0217	30.1086	5.88289	21.1227	0	22.0732	33.2769	33.7803	115.643	-1.54025	-1.72266	0.182413	THUMPD3-AS1	chr3:9433306:-	chr3_9391591_-
chr4:156273742-156273887:mpeak_59869|chr4_156269057_156298122_MAP9_NM_-|	8.9146	0.962596	1.81081	0.531583	0.595015	NA	3.36165	1.34826	5.01743	9.13375	14.4682	11.0153	3.36165	2.2471	0	21.3121	18.0853	17.6245	115.621	-1.83138	-3.34576	1.51439	MAP9	-	chr4_155352595_-;chr4_155352656_-
chr3:180666163-180666293:mpeak_56064|chr3_180630233_180693909_FXR1_NM_+|	199.309	0.345535	1.64375	0.210211	0.833503	0.999521	71.435	136.174	787.737	93.6209	60.7665	99.8723	52.1056	432.791	376.307	95.1432	99.8307	85.9196	115.576	1.96889	1.61633	0.352563	FXR1	chr3:180666226:+	-
chr11:117400623-117400679:mpeak_15683|chr11_117299519_117667976_DSCAML1_NM_-|	82.7876	5.31514	6.00754	0.884745	NA	NA	0	0	531.848	0	0	0	0	0	461.604	0	0	0	115.217	Inf	Inf	NaN	DSCAML1	-	-
chr3:196014396-196014538:mpeak_56585|chr3_195965765_196014584_PCYT1A_NM_-|	19.6061	-3.9571	2.08541	-1.89751	0.0577601	0.663341	9.24454	35.9536	0	66.2197	36.1705	40.3895	4.20206	35.0548	0	0.761146	4.34046	2.93742	115.134	-1.65946	2.28785	-3.94731	PCYT1A	-	-
chr20:21312917-21313064:mpeak_47422|chr20_21283941_21369910_XRN2_NM_+|	48.932	0.424567	1.81269	0.234219	0.814815	0.999521	24.372	17.5274	230.802	21.3121	3.61705	10.281	63.8713	18.4262	155.54	15.9841	16.6384	8.81226	114.658	2.95326	2.52106	0.432194	XRN2	-	chr20_21332426_+
chr15:43094062-43094138:mpeak_26099|chr15_43038455_43213007_TTBK2_NM_-|	5.11929	-4.00094	2.96533	-1.34924	0.17726	NA	24.372	8.53898	0	6.85031	3.61705	3.67178	0	14.3814	0	0	0	0	114.422	1.21887	Inf	-Inf	TTBK2	-	-
chr17:76704272-76704340:mpeak_35300|chr17_76672251_76778424_CYTH1_NM_-|	42.7743	4.96108	2.81654	1.76141	0.0781698	0.729961	0	13.932	200.697	0	0	0	8.40412	77.7496	195.68	0.761146	5.78729	10.281	114.232	Inf	4.06579	Inf	CYTH1	chr17:76704278:-	-
chr2:136269045-136269109:mpeak_44181|chr2_135958010_136288806_ZRANB3_NM_-|	8.50968	-1.84802	2.52556	-0.731728	0.464334	NA	25.2124	14.3814	5.01743	35.0127	2.89364	2.93742	0	13.0332	0	0	2.89364	0.734355	114.097	0.127291	1.84494	-1.71765	ZRANB3	-	-
chr18:19262853-19262916:mpeak_36091|chr18_19231724_19284766_ABHD3_NM_-|	7.70873	1.76045	2.99388	0.588015	0.556522	NA	0	24.2687	0	3.80573	0	0	40.3398	2.2471	0	1.52229	15.915	4.40613	113.973	2.67285	0.963208	1.70964	ABHD3	chr18:19262861:-	chr18_21682902_-
chr2:232143486-232143586:mpeak_46451|chr2_232063259_232236223_ARMC9_NM_+|	3.67859	-1.51619	2.79874	-0.54174	0.587997	NA	10.0849	6.29188	0	3.80573	7.95752	5.87484	0	7.19072	0	0	0	2.93742	113.875	-0.107038	1.29159	-1.39862	ARMC9	chr2:232143585:+	chr2_231278824_+;chr2_231278871_+
chr5:37381714-37381797:mpeak_61078|chr5_37379411_37752587_WDR70_NM_+|	11.5236	-0.435557	2.58523	-0.168479	0.866206	NA	1.68082	30.1111	60.2092	6.08916	0.723411	8.81226	0	26.9652	0	1.52229	2.17023	0	113.728	2.55781	2.86842	-0.310609	WDR70	-	chr5_37381675_+
chr8:125555319-125555386:mpeak_76466|chr8_125551342_125562001_NDUFB9_NM_+|	2077.03	-0.425802	1.86017	-0.228905	0.818943	0.999521	2648.98	2191.82	75.2615	3902.39	2643.34	2917.59	1974.97	2308.67	50.1743	1924.18	2295.38	1991.57	113.435	-0.944845	-0.519219	-0.425626	NDUFB9	-	chr8_124543129_+;chr8_124543190_+
chr19:57706169-57706333:mpeak_40156|chr19_57702867_57722721_ZNF264_NM_+|	6.08925	-3.97752	2.50981	-1.58479	0.113015	NA	7.56371	23.3698	0	6.08916	2.89364	5.14049	8.40412	18.8756	0	0	0	0.734355	113.394	1.1311	5.21521	-4.08411	ZNF264	chr19:57706224:+;chr19:57706315:+	chr19_57194855_+;chr19_57194962_+
chr7:74973158-74973218:mpeak_71453|chr7_74703024_74988276_PMS2P5_NR_-|	3.57444	0.0172987	2.16865	0.0079767	0.993636	NA	2.52124	1.79768	0	6.85031	4.34046	7.34355	3.36165	0.44942	0	4.56687	5.78729	5.87484	113.326	-2.10146	-2.09031	-0.0111518	PMS2P5	-	-
chr2:152295208-152295268:mpeak_44444|chr2_152266396_152331370_RIF1_NM_+|	42.4607	20.1839	3.19239	6.32252	NA	NA	1.68082	4.04478	376.307	0	0	0	0	112.804	0	2.28344	5.06388	7.34355	112.889	Inf	2.94083	Inf	RIF1	-	-
chrX:53438940-53439206:mpeak_81159|chrX_53407107_53449677_SMC1A_NM_-|	146.776	2.28516	1.97649	1.15617	0.247612	0.999521	63.0309	22.9204	632.196	42.6242	9.40434	23.4994	229.433	402.68	5.01743	132.439	110.682	87.3883	112.716	3.2492	0.946897	2.3023	SMC1A	-	chrX_53412057_-;chrX_53412130_-
chr17:5290295-5290421:mpeak_31731|chr17_5289589_5323059_NUP88_NM_-|	33.4212	1.97788	1.66843	1.18548	0.235829	0.999521	49.5843	16.1791	60.2092	15.9841	14.4682	4.40613	55.4672	51.6833	5.01743	17.5063	70.8943	39.6552	112.307	1.85353	-0.191112	2.04464	NUP88	-	chr17_5387097_-
chr17:62530698-62530821:mpeak_34751|chr17_62503157_62533720_CEP95_NM_+|	4.32033	2.09727	2.56968	0.816158	0.41441	NA	4.20206	4.94362	5.01743	0.761146	0	6.6092	1.68082	6.7413	0	0	9.40434	12.484	112.11	0.942335	-1.37791	2.32024	CEP95	-	chr17_64534624_+;chr17_64534667_+;chr17_64534703_+
chr17:27003167-27003325:mpeak_32583|chr17_26989301_27028456_SUPT6H_NM_+|	119.969	1.88189	1.74349	1.07938	0.28042	0.999521	62.1905	66.9636	356.238	52.519	33.2769	33.7803	152.115	276.393	5.01743	156.796	110.682	133.653	111.964	2.02122	0.112044	1.90917	SUPT6H	-	chr17_28676205_+
chr10:121619331-121619404:mpeak_11872|chr10_121591112_121633140_MCMBP_NM_-|	31.5186	-0.00942163	1.58619	-0.0059398	0.995261	0.999521	47.9035	28.7629	5.01743	53.2802	31.1067	33.7803	31.0953	36.8524	5.01743	28.9235	41.2344	35.2491	111.949	-0.532708	-0.530692	-0.00201578	MCMBP	-	-
chr1:52306106-52306189:mpeak_2540|chr1_52255105_52344609_NRD1_NM_-mpeak_2540|chr1_52255105_52344609_NRD1_NM_-||	139.375	0.436372	1.40863	0.309784	0.756725	0.999521	136.987	120.445	110.383	141.573	186.64	110.888	84.0412	209.43	35.122	256.506	148.299	132.184	111.936	-0.255571	-0.708592	0.453021	NRD1	-	-
chr13:37597688-37597763:mpeak_21304|chr13_37583946_37633850_SUPT20H_NM_-|	5.18692	2.38341	2.63876	0.903229	0.366405	NA	0	8.53898	0	0.761146	3.61705	3.67178	0	7.64014	0	3.80573	20.2555	13.9527	111.765	0.085079	-2.31486	2.39994	SUPT20H	chr13:37597702:-	chr13_37023561_-
chr13:113505345-113505483:mpeak_22369|chr13_113344642_113536129_ATP11A_NM_+|	3.40936	0.417582	2.34091	0.178385	0.858421	NA	7.56371	5.39304	0	3.80573	3.61705	0	7.56371	4.04478	0	3.80573	1.44682	3.67178	111.614	0.803672	0.379365	0.424307	ATP11A	-	chr13_112851144_+
chr10:127490621-127490712:mpeak_12017|chr10_127477574_127511837_UROS_NM_-|	46.1495	0.108473	1.76741	0.0613741	0.951061	0.999521	52.1056	12.5838	0	35.7738	60.0431	69.7637	55.4672	26.5158	5.01743	96.6655	75.2347	64.6233	111.533	-1.35593	-1.44289	0.0869542	UROS	chr10:127490626:-	chr10_125802058_-
chr16:31135227-31135389:mpeak_29655|chr16_31128984_31142066_KAT8_NM_+|	20.2564	-0.129	1.88265	-0.0685203	0.945371	0.999521	27.7336	35.5042	0	14.4618	39.0642	13.9527	24.372	32.3582	0	21.3121	13.0214	21.2963	111.471	-0.0936455	0.0282594	-0.121905	KAT8	chr16:31135335:+;chr16:31135385:+	chr16_31123938_+;chr16_31124009_+
chr19:28294254-28294382:mpeak_38571|chr19_28284374_28296512_LOC101927151_NR_+|	6.75093	-1.75247	2.08452	-0.840706	0.400512	NA	5.04247	17.5274	0	4.56687	10.1278	15.4215	5.88289	14.3814	0	0.761146	2.89364	4.40613	111.377	-0.416137	1.32993	-1.74606	LOC101927151	chr19:28294344:+;chr19:28294377:+	chr19_27803423_+;chr19_27803468_+
chr15:44116679-44116751:mpeak_26192|chr15_44097474_44116951_MFAP1_NM_-|	8.80766	0.617789	2.27111	0.27202	0.785606	NA	0	1.79768	35.122	2.28344	2.89364	8.07791	12.6062	20.6733	0	8.3726	5.78729	8.07791	110.938	1.47786	0.58162	0.896235	MFAP1	-	chr15_43824495_-
chr1:85642814-85643079:mpeak_3267|chr1_85624932_85666728_SYDE2_NM_-|	2.33886	-2.94287	2.86595	-1.02684	0.304496	NA	4.20206	0	0	3.80573	5.06388	4.40613	0.840412	6.7413	0	2.28344	0.723411	0	110.847	-1.65962	1.33427	-2.99389	SYDE2	-	-
chr12:56307533-56307676:mpeak_18204|chr12_56296139_56321697_WIBG_NM_-|	13.3385	-0.956836	1.92296	-0.497586	0.618776	0.999521	27.7336	5.84246	0	22.0732	14.4682	28.6399	9.24454	21.1227	0	6.08916	7.95752	16.8902	110.567	-0.957025	-0.0268093	-0.930216	WIBG	chr12:56307530:-;chr12:56307610:-	chr12_55913726_-;chr12_55913810_-;chr12_55913873_-
chr17:57157109-57157243:mpeak_34294|chr17_57060282_57184266_TRIM37_NM_-|	22.1643	1.66541	2.0611	0.808019	0.41908	0.999521	31.0953	0.89884	5.01743	38.8184	18.8087	11.0153	21.0103	1.34826	0	44.1464	60.7665	33.046	110.357	-0.891126	-2.62534	1.73421	TRIM37	-	-
chr5:76327083-76327147:mpeak_61970|chr5_76326209_76358876_AGGF1_NM_+|	13.2992	1.94621	1.86749	1.04215	0.297341	0.999521	0	13.932	5.01743	4.56687	7.23411	6.6092	10.9254	9.88724	5.01743	38.0573	26.7662	31.5773	110.043	0.0416521	-1.9	1.94165	AGGF1	chr5:76327142:+	chr5_77031281_+;chr5_77031313_+
chr1:62321713-62321918:mpeak_2833|chr1_62208148_62626579_INADL_NM_+|	6.01373	-0.51907	2.84877	-0.182209	0.855419	NA	11.7658	0	0	15.2229	2.17023	0	21.0103	0.44942	0	9.89489	6.5107	5.14049	109.654	-0.563923	-0.00579347	-0.558129	INADL	-	chr1_61856179_+
chr16:50401945-50402161:mpeak_29878|chr16_50353177_50402845_BRD7_NM_-|	71.6199	1.76272	1.78729	0.986252	0.324009	0.999521	13.4466	68.3118	195.68	28.1624	27.4896	22.765	48.7439	199.542	5.01743	62.4139	105.618	82.2478	109.528	1.82293	0.0173273	1.8056	BRD7	-	chr16_50368166_-
chr20:17596066-17596197:mpeak_47309|chr20_17594865_17662928_RRBP1_NM_-|	61.665	-1.05314	1.81999	-0.578653	0.562823	0.999521	90.7645	161.791	10.0349	68.5031	46.2983	49.9362	34.4569	200.441	5.01743	32.7293	25.3194	14.6871	109.451	0.672646	1.72179	-1.04915	RRBP1	-	-
chr12:49718073-49718202:mpeak_17714|chr12_49716970_49725355_TROAP_NM_+|	41.3141	-1.27294	2.04571	-0.622246	0.53378	0.999521	69.7542	4.4942	0	82.9649	52.0856	120.434	15.9678	52.1327	0	24.3567	39.0642	34.5147	109.028	-1.7828	-0.524166	-1.25864	TROAP	chr12:49718115:+;chr12:49718160:+;chr12:49718197:+	chr12_49324393_+
chr16:30425385-30425536:mpeak_29527|chr16_30418734_30428875_ZNF771_NM_+|	12.9492	-0.697715	2.05625	-0.339315	0.734373	0.999521	28.574	0.89884	0	19.7898	20.2555	22.765	17.6487	9.43782	0	9.13375	18.8087	8.07791	108.81	-1.09161	-0.411239	-0.680375	ZNF771	chr16:30425525:+	chr16_30414203_+
chr6:73760505-73760563:mpeak_67359|chr6_73331570_73904174_KCNQ5_NM_+|	3.08334	-0.776761	4.03379	-0.192564	0.847301	NA	0	13.0332	0	0	0	0	0	13.932	10.0349	0	0	0	108.76	Inf	Inf	NaN	KCNQ5	-	-
chr6:86160786-86161632:mpeak_67654|chr6_86159301_86203558_NT5E_NM_+|	63.5034	3.87222	3.01876	1.28272	NA	NA	1.68082	456.161	5.01743	0.761146	0	0.734355	3.36165	280.887	0	8.3726	5.06388	0	108.557	8.2738	4.40293	3.87087	NT5E	chr6:86160838:+	chr6_85451130_+;chr6_85451547_+;chr6_85451585_+;chr6_85451737_+
chr8:74565894-74565948:mpeak_75249|chr8_74333700_74659943_STAU2_NM_-|	3.30887	0.542972	2.52576	0.214973	0.829788	NA	3.36165	0.89884	0	1.52229	11.5746	0	1.68082	2.2471	0	4.56687	6.5107	7.34355	108.467	-1.62013	-2.22952	0.609392	STAU2	chr8:74565898:-	chr8_73653663_-
chr2:219137610-219137678:mpeak_46116|chr2_219135114_219209530_PNKD_NM_+|	78.5478	-0.363711	1.7022	-0.213671	0.830804	0.999521	111.775	69.6601	0	93.6209	77.405	77.8417	120.179	35.5042	95.3312	102.755	104.895	53.6079	108.421	-0.455926	-0.057701	-0.398225	PNKD	chr2:219137636:+;chr2:219137670:+	chr2_218272945_+
chr9:35685051-35685102:mpeak_77704|chr9_35682160_35690053_TPM2_NM_-|	26.8263	2.18363	3.26292	0.669223	NA	NA	0	110.557	0	0.761146	0	0	0.840412	203.138	0	1.52229	2.89364	2.20307	108.401	7.18241	4.94566	2.23675	TPM2	-	-
chr16:12229543-12229593:mpeak_28849|chr16_12070590_12662362_SNX29_NM_+|	3.66183	1.51523	2.89456	0.523475	0.600644	NA	0	8.53898	0	0	1.44682	0	3.36165	15.2803	5.01743	0.761146	0.723411	8.81226	108.274	2.56118	1.20021	1.36096	SNX29	chr16:12229594:+	chr16_12135736_+
chr13:94186316-94186366:mpeak_22055|chr13_93879077_95055268_GPC6_NM_+|	46.2639	0.298938	1.81555	0.164655	0.869216	0.999521	37.8186	153.702	5.01743	43.3853	18.0853	22.0307	110.934	5.84246	65.2266	29.6847	29.6598	33.7803	107.986	1.23494	0.966728	0.268208	GPC6	-	-
chr2:203147062-203147198:mpeak_45699|chr2_203130514_203168108_NOP58_NM_+|	54.9815	3.73702	2.00454	1.86428	0.0622826	0.687298	20.1699	3.59536	150.523	25.879	5.78729	7.34355	55.4672	52.1327	0	82.2037	120.086	136.59	107.985	2.15957	-1.6551	3.81466	NOP58	-	-
chr20:21309190-21309303:mpeak_47421|chr20_21283941_21369910_XRN2_NM_+|	55.8858	-1.55409	1.47411	-1.05426	0.291765	0.999521	79.8392	91.6817	85.2963	42.6242	40.511	51.4049	63.8713	18.4262	155.54	15.9841	16.6384	8.81226	107.98	0.932706	2.52106	-1.58836	XRN2	-	chr20_21328607_+;chr20_21328636_+
chr3:72978301-72978638:mpeak_53557|chr3_72937384_73024127_GXYLT2_NM_+|	9.99798	0.970579	1.8667	0.519944	0.603103	NA	10.0849	3.59536	15.0523	5.32802	15.1916	9.54662	15.9678	1.79768	0	11.4172	20.9789	11.0153	107.822	-0.0654572	-1.289	1.22354	GXYLT2	-	-
chr10:101978755-101978813:mpeak_11266|chr10_101949384_101989344_CHUK_NM_-|	40.8967	2.89202	2.03561	1.42071	0.1554	0.92013	1.68082	3.14594	165.575	6.85031	6.5107	6.6092	81.52	16.6285	60.2092	17.5063	69.4474	55.0766	107.606	3.09302	0.156987	2.93603	CHUK	-	-
chr1:1327575-1327761:mpeak_83|chr1_1322962_1334718_CCNL2_NM_-|	21.4914	-1.06582	1.64665	-0.647265	0.51746	0.999521	39.4994	28.3135	5.01743	21.3121	24.596	35.9834	5.04247	42.6949	20.0697	9.89489	15.1916	10.281	107.408	-0.169175	0.939012	-1.10819	CCNL2	chr1:1327602:-;chr1:1327673:-	chr1_1392223_-;chr1_1392284_-
chr6:143382671-143382744:mpeak_68855|chr6_143380499_143660775_AIG1_NM_+|	27.2409	1.15964	1.82727	0.634632	0.525668	0.999521	6.7233	49.8856	0	18.2675	14.4682	14.6871	52.946	21.1227	5.01743	38.0573	50.6388	55.0766	107.368	0.255448	-0.862293	1.11774	AIG1	chr6:143382732:+	chr6_143061543_+;chr6_143061594_+
chr4:108853827-108853886:mpeak_59074|chr4_108852716_108871400_CYP2U1_NM_+|	7.1393	0.0425413	2.53308	0.0167943	0.986601	NA	0	21.1227	0	0.761146	2.17023	5.87484	2.52124	36.8524	0	7.61146	3.61705	5.14049	107.294	1.2622	1.26627	-0.00406336	CYP2U1	chr4:108853880:+	chr4_107932686_+;chr4_107932722_+
chr1:1630056-1630187:mpeak_129|chr1_1571218_1655859_CDK11B_NM_-|	15.5794	-0.909103	1.89897	-0.478734	0.632128	0.999521	7.56371	24.7181	0	6.85031	26.7662	30.1086	4.20206	35.9536	5.01743	12.1783	12.298	21.2963	107.194	-0.98114	-0.0190213	-0.962119	CDK11B	-	-
chr12:9589993-9590045:mpeak_16692|chr12_9571295_9600768_DDX12P_NR_-|	3.33476	-1.57056	2.49665	-0.629067	0.529305	NA	0.840412	7.19072	0	8.3726	2.89364	7.34355	1.68082	5.84246	0	0	1.44682	4.40613	106.75	-1.21239	0.362198	-1.57459	DDX12P	-	-
chr5:54585090-54585250:mpeak_61329|chr5_54552368_54603521_DHX29_NM_-|	28.6219	1.03072	1.45133	0.71019	0.477586	0.999521	32.7761	19.7745	25.0872	20.5509	16.6384	27.1711	21.0103	41.7961	10.0349	27.4012	56.426	44.7957	106.585	0.270581	-0.820321	1.0909	DHX29	-	chr5_55289279_-
chr10:27520652-27520771:mpeak_9409|chr10_27486371_27531068_ACBD5_NM_-|	80.3871	-0.472428	2.25253	-0.209733	0.833876	0.999521	21.8507	1.34826	351.22	63.1751	28.9364	49.9362	39.4994	1.34826	311.081	21.3121	46.2983	28.6399	106.391	1.39828	1.87042	-0.472141	ACBD5	-	-
chr11:34978925-34978992:mpeak_13229|chr11_34937676_35016460_PDHX_NM_+|	20.4612	0.836753	1.86516	0.448622	0.653704	0.999521	42.0206	21.5722	0	22.0732	10.1278	13.2184	31.0953	28.7629	0	19.7898	26.7662	30.1086	106.239	0.485555	-0.357012	0.842568	PDHX	-	chr11_34957436_+
chr17:36003354-36003458:mpeak_33034|chr17_35974398_36003493_DDX52_NM_-|	28.9399	-1.26697	2.1942	-0.577418	0.563657	0.999521	14.287	97.5241	0	54.8025	13.0214	25.7024	10.9254	94.3782	0	4.56687	15.915	16.1558	106.18	0.25762	1.52315	-1.26553	DDX52	-	-
chr1:171482171-171482335:mpeak_6251|chr1_171454665_171560725_PRRC2C_NM_+|	95.0487	0.420972	1.90077	0.221474	0.824723	0.999521	10.0849	66.9636	431.499	20.5509	17.3619	29.3742	14.287	274.146	190.662	9.89489	40.511	35.2491	106.147	2.91798	2.4837	0.434278	PRRC2C	-	-
chr19:6381797-6381866:mpeak_37458|chr19_6380496_6393291_GTF2F1_NM_-|	157.832	-0.300571	1.9636	-0.153071	0.878342	0.999521	82.3604	476.385	20.0697	270.968	199.661	158.621	114.296	249.428	0	121.022	99.8307	101.341	106.091	-0.12053	0.174916	-0.295446	GTF2F1	-	-
chr1:46072937-46073172:mpeak_2358|chr1_46049659_46083732_NASP_NM_+|	117.114	3.27168	1.69461	1.93063	0.0535284	0.647271	17.6487	76.4014	451.569	5.32802	17.3619	11.0153	95.807	243.586	175.61	69.2643	133.831	107.95	105.945	4.01685	0.727454	3.2894	NASP	chr1:46073053:+	chr1_45607342_+;chr1_45607361_+;chr1_45607408_+;chr1_45607439_+;chr1_45607500_+;chr1_45607549_+
chr9:37899823-37899944:mpeak_77851|chr9_37880745_37904350_SLC25A51_NR_-mpeak_77851|chr9_37888589_37904350_SLC25A51_NM_-||	4.3876	-2.68646	2.30867	-1.16364	0.24457	NA	10.0849	2.2471	0	3.04458	10.1278	11.7497	6.7233	4.94362	0	2.28344	1.44682	0	105.701	-1.01501	1.64508	-2.66008	SLC25A51	chr9:37899797:-	chr9_37899801_-
chrX:24966097-24966152:mpeak_80701|chrX_24712063_25013921_POLA1_NM_+|	12.5069	2.89198	2.39756	1.20621	0.227735	NA	3.36165	0.44942	60.2092	0	2.17023	0.734355	21.8507	33.7065	5.01743	0.761146	13.7448	8.07791	105.688	4.46212	1.42342	3.0387	POLA1	-	-
chr11:124545250-124545325:mpeak_16003|chr11_124543739_124564198_SPA17_NM_+|	11.4126	2.05818	1.76205	1.16806	0.242784	NA	16.8082	5.39304	25.0872	5.32802	7.23411	2.20307	15.9678	13.932	0	14.4618	20.2555	10.281	105.437	1.67929	-0.58973	2.26902	SPA17	chr11:124545314:+	chr11_124675417_+
chr5:158202485-158202565:mpeak_64303|chr5_158126150_158526788_EBF1_NM_-|	90.0829	3.78655	6.00756	0.630297	NA	NA	0	0	371.29	0	0	0	0	2.2471	707.458	0	0	0	104.632	Inf	Inf	NaN	EBF1	-	-
chr12:93172886-93173009:mpeak_19183|chr12_93169909_93323107_EEA1_NM_-|	6.50279	-0.769103	2.04968	-0.375231	0.707489	NA	0	4.94362	0	9.13375	8.68093	8.07791	3.36165	5.84246	5.01743	6.08916	18.8087	8.07791	104.284	-2.3889	-1.21333	-1.17557	EEA1	-	chr12_92779199_-
chr19:12969680-12969790:mpeak_37910|chr19_12949258_12984422_MAST1_NM_+|	4.0953	-4.52513	3.12467	-1.4482	0.147562	NA	0.840412	19.7745	0	9.89489	4.34046	4.40613	0	9.88724	0	0	0	0	104.25	0.14517	Inf	-Inf	MAST1	chr19:12969731:+;chr19:12969784:+	chr19_12858916_+;chr19_12858976_+
chr10:127531298-127531383:mpeak_12030|chr10_127512103_127541693_BCCIP_NM_+|	14.0903	0.394452	2.17434	0.181412	0.856044	0.999521	0	16.1791	0	5.32802	13.7448	16.8902	17.6487	13.4826	0	13.7006	39.0642	33.046	103.941	-1.15238	-1.4628	0.310415	BCCIP	chr10:127531371:+	chr10_125842727_+;chr10_125842815_+
chr15:44695157-44695258:mpeak_26213|chr15_44580908_44705533_CASC4_NM_+|	73.1558	1.60951	1.74795	0.920802	0.357154	0.999521	25.2124	14.3814	230.802	40.3407	22.4257	24.2337	139.508	15.2803	105.366	55.5636	105.618	99.138	103.936	1.63598	-0.000913697	1.6369	CASC4	-	chr15_44403017_+
chr4:119610521-119610611:mpeak_59256|chr4_119606524_119631152_METTL14_NM_+|	23.7089	2.60762	2.02835	1.28559	0.198587	0.966122	5.04247	3.14594	100.349	9.89489	5.78729	4.40613	30.2548	39.549	0	22.8344	42.6812	20.5619	103.659	2.43376	-0.302332	2.73609	METTL14	-	chr4_118689437_+
chr17:49340621-49340739:mpeak_34071|chr17_49337896_49375142_UTP18_NM_+|	47.43	-0.81483	2.23604	-0.364408	0.715554	0.999521	14.287	168.532	0	47.9522	49.1919	38.1865	12.6062	164.038	0	16.7452	26.0428	31.5773	103.496	0.433932	1.24815	-0.814216	UTP18	-	chr17_51263364_+
chr22:50829214-50829273:mpeak_51379|chr22_50781745_50882627_PPP6R2_NM_+|	32.9938	-2.54734	1.64162	-1.55172	0.120729	0.858562	23.5315	10.3367	0	100.471	62.2133	89.5913	22.6911	21.5722	5.01743	15.2229	16.6384	28.6399	103.088	-2.897	-0.295941	-2.60106	PPP6R2	-	-
chr13:32945080-32945247:mpeak_21206|chr13_32889616_32972298_BRCA2_NM_+|	4.13863	-0.451937	2.49326	-0.181264	0.856161	NA	1.68082	12.5838	0	3.80573	4.34046	4.40613	0.840412	13.0332	0	4.56687	0	4.40613	102.818	0.184483	0.628678	-0.444195	BRCA2	-	-
chr7:81613948-81614005:mpeak_71632|chr7_81579824_82073122_CACNA2D1_NM_-|	227.938	4.3033	6.00666	0.716421	NA	NA	0	0	928.225	0	0	0	0	10.7861	1796.24	0	0	0	102.735	Inf	Inf	NaN	CACNA2D1	-	-
chr4:174254252-174254370:mpeak_60115|chr4_174253389_174255595_HMGB2_NM_-|	988.246	2.84146	2.03114	1.39895	0.161828	0.933333	111.775	38.6501	4696.31	130.917	80.2986	75.6386	840.412	268.753	3612.55	579.232	646.729	777.682	102.648	4.07862	1.23669	2.84194	HMGB2	-	chr4_173333080_-;chr4_173333140_-;chr4_173333174_-;chr4_173333200_-
chr14:75283888-75284000:mpeak_24452|chr14_75230068_75302477_YLPM1_NM_+|	65.7258	2.03338	2.01676	1.00824	0.313337	0.999521	21.0103	42.6949	341.185	6.85031	16.6384	8.81226	57.148	206.284	0	19.7898	48.4685	19.8276	102.466	3.64788	1.58045	2.06743	YLPM1	-	chr14_74817234_+
chr8:133816055-133816230:mpeak_76639|chr8_133787603_133858025_PHF20L1_NM_+|	19.7982	-2.5924	1.82919	-1.41724	0.156413	0.921717	7.56371	39.0995	10.0349	57.0859	38.3408	33.7803	5.04247	31.9088	0	3.80573	6.5107	4.40613	102.293	-1.18831	1.3276	-2.51591	PHF20L1	-	-
chr12:42755453-42755506:mpeak_17428|chr12_42719946_42840393_PPHLN1_NM_+|	4.08938	-1.38767	2.40975	-0.575857	0.564712	NA	0	8.08956	0	4.56687	1.44682	8.81226	5.04247	10.7861	0	2.28344	2.17023	5.87484	102.215	-0.873993	0.615897	-1.48989	PPHLN1	chr12:42755505:+	chr12_42361701_+
chr16:74946004-74946066:mpeak_30730|chr16_74908342_75019017_WDR59_NM_-|	15.5033	-0.00606904	1.81408	-0.00334552	0.997331	0.999521	20.1699	10.7861	0	28.9235	23.1491	11.0153	16.8082	13.4826	0	11.4172	25.3194	24.9681	102.196	-1.02715	-1.0265	-0.000650723	WDR59	chr16:74946015:-	chr16_74912108_-
chr2:44002076-44002133:mpeak_41517|chr2_44001177_44036843_DYNC2LI1_NM_+|	3.6278	1.9209	2.34815	0.818048	0.41333	NA	3.36165	4.94362	0	0	2.89364	2.93742	5.88289	2.2471	0	2.28344	7.23411	11.7497	102.156	0.510268	-1.38731	1.89757	DYNC2LI1	chr2:44002129:+	chr2_43774987_+
chr4:39329275-39329388:mpeak_57679|chr4_39290464_39368001_RFC1_NM_-|	25.2813	-0.802536	1.86959	-0.429257	0.667736	0.999521	17.6487	38.6501	0	17.5063	41.9578	30.1086	7.56371	70.5589	5.01743	18.2675	29.6598	26.4368	101.573	-0.669956	0.160937	-0.830893	RFC1	-	-
chr15:44624175-44624277:mpeak_26211|chr15_44580908_44705533_CASC4_NM_+|	77.0977	0.883045	1.76929	0.499097	0.617711	0.999521	30.2548	8.08956	225.784	47.9522	42.6812	49.9362	139.508	15.2803	105.366	55.5636	105.618	99.138	101.528	0.909957	-0.000913697	0.910871	CASC4	-	-
chr3:60715998-60716058:mpeak_53267|chr3_59735305_61237133_FHIT_NM_-|	4.4536	-5.7405	3.43834	-1.66955	0.0950076	NA	15.9678	0	0	13.7006	2.17023	5.87484	0	15.7297	0	0	0	0	101.514	-0.445561	Inf	-Inf	FHIT	-	-
chr19:5604585-5604711:mpeak_37387|chr19_5587410_5622938_SAFB2_NM_-|	37.8152	-1.52472	1.98928	-0.766468	0.443398	0.999521	47.0631	85.8392	0	62.4139	40.511	38.1865	50.4247	80.8956	0	10.656	26.0428	11.7497	101.205	-0.0864688	1.43857	-1.52503	SAFB2	chr19:5604594:-	chr19_5604631_-
chr14:58923446-58923576:mpeak_23782|chr14_58894102_59014498_KIAA0586_NM_+|	4.4075	-0.372446	2.33428	-0.159555	0.873232	NA	0	9.43782	0	0.761146	2.17023	2.20307	5.88289	17.078	5.01743	2.28344	1.44682	6.6092	101.198	0.878245	1.43615	-0.557901	KIAA0586	-	chr14_58456776_+
chr1:154143881-154143933:mpeak_5481|chr1_154130197_154155725_TPM3_NR_-mpeak_5481|chr1_154131524_154164611_TPM3_NM_-||	24.2401	2.81463	1.92456	1.46248	0.14361	0.905304	5.04247	2.69652	40.1394	13.7006	6.5107	1.46871	37.8186	4.4942	5.01743	50.2356	71.6177	52.1392	101.158	1.14301	-1.87819	3.0212	TPM3	-	chr1_154171426_-
chr8:26212012-26212157:mpeak_74229|chr8_26149006_26227649_PPP2R2A_NM_+|	254.39	0.824218	1.76001	0.468304	0.639567	0.999521	122.7	73.7049	1018.54	71.5477	67.2772	91.7944	83.2008	136.174	983.416	131.678	132.384	140.262	101.01	2.3973	1.5728	0.824502	PPP2R2A	-	chr8_26354528_+;chr8_26354597_+
chr2:11338840-11338906:mpeak_40578|chr2_11323566_11484711_ROCK2_NM_-|	32.6798	0.734392	2.0064	0.366024	0.714347	0.999521	3.36165	50.7844	75.2615	29.6847	30.3833	22.0307	4.20206	81.345	0	22.0732	26.7662	46.2644	100.847	0.656492	-0.152785	0.809277	ROCK2	-	-
chr4:69203990-69204083:mpeak_58186|chr4_69180041_69215824_YTHDC1_NM_-|	361.208	-0.24968	2.25183	-0.110878	NA	NA	15.1274	37.7513	1931.71	60.8916	65.8304	81.5134	19.3295	87.1875	1861.47	33.4904	52.809	87.3883	100.844	3.25255	3.50215	-0.249598	YTHDC1	-	chr4_68338290_-
chr8:179972-180060:mpeak_73793|chr8_163710_182318_RPL23AP53_NR_-|	2.75183	-1.43457	2.74938	-0.521778	0.601825	NA	6.7233	0.44942	0	9.89489	2.89364	0.734355	0.840412	6.29188	0	1.52229	0	3.67178	100.567	-0.914812	0.457501	-1.37231	RPL23AP53	chr8:179979:-;chr8:180006:-	chr8_230008_-
chr3:62260501-62260653:mpeak_53303|chr3_62249817_62304622_PTPRG-AS1_NR_-|	9.39451	1.5927	2.44194	0.652227	0.514255	NA	17.6487	0.89884	0	6.08916	2.17023	24.9681	9.24454	0	0	17.5063	20.2555	13.9527	100.316	-0.841152	-2.4839	1.64275	PTPRG-AS1	-	chr3_62274828_-
chr13:42877949-42878005:mpeak_21434|chr13_42846288_42893223_AKAP11_NM_+|	19.6837	-1.05258	1.7034	-0.61793	0.536621	0.999521	8.40412	10.3367	0	60.8916	16.6384	35.9834	5.04247	17.9768	5.01743	20.5509	29.6598	25.7024	100.266	-2.59861	-1.43703	-1.16158	AKAP11	-	-
chr15:67920272-67920332:mpeak_27103|chr15_67835020_68098983_MAP2K5_NM_+|	68.9797	5.19636	3.17693	1.63565	0.101912	0.802173	0	0	195.68	0	0	0	7.56371	37.3019	541.882	19.7898	10.8512	14.6871	100.05	Inf	3.69426	Inf	MAP2K5	-	-
chr3:4725309-4725493:mpeak_51459|chr3_4535031_4887822_ITPR1_NM_+|	8.19639	-0.163187	2.55938	-0.0637602	0.949161	NA	0	22.0216	0	1.52229	1.44682	0	5.04247	35.9536	25.0872	0.761146	5.78729	0.734355	99.972	2.89081	3.18172	-0.290907	ITPR1	-	-
chr17:58378965-58379071:mpeak_34459|chr17_58256789_58469586_USP32_NM_-|	121.346	2.94256	1.90577	1.54403	0.122581	0.860437	22.6911	3.59536	180.627	57.8471	26.7662	30.8429	139.508	62.9188	5.01743	200.181	396.429	329.726	99.7442	0.841686	-2.15881	3.00049	USP32	-	-
chr4:95921602-95921682:mpeak_58786|chr4_95679127_96075698_BMPR1B_NM_+|	39.5874	0.378713	1.98674	0.190621	0.848823	0.999521	57.148	1.79768	5.01743	73.8311	62.2133	58.7484	37.8186	4.94362	0	38.0573	73.7879	61.6858	99.7192	-1.60663	-2.02079	0.414158	BMPR1B	-	-
chr9:97784398-97784572:mpeak_78536|chr9_97488950_97848963_C9orf3_NM_+|	28.059	-0.205601	2.16364	-0.0950254	0.924295	0.999521	29.4144	0.44942	0	54.8025	57.1495	35.9834	27.7336	2.2471	0	35.7738	55.7026	37.4521	99.6102	-2.30849	-2.10447	-0.204029	C9orf3	chr9:97784453:+;chr9:97784562:+	chr9_95022183_+;chr9_95022279_+
chr21:47681188-47681295:mpeak_49874|chr21_47655340_47705308_MCM3AP_NM_-|	59.8173	-0.150535	1.83878	-0.081867	0.934752	0.999521	73.9563	101.119	0	53.2802	23.8726	41.1239	100.009	154.6	10.0349	41.863	67.2772	50.6705	99.2327	0.565814	0.727691	-0.161877	MCM3AP	-	-
chr1:233231397-233231459:mpeak_8209|chr1_233120223_233431459_PCNXL2_NM_-|	8.67607	-1.26708	1.88229	-0.673157	0.500847	NA	10.0849	16.6285	0	9.13375	6.5107	8.81226	5.88289	4.4942	30.1046	1.52229	5.06388	5.87484	98.9836	0.127338	1.69985	-1.57251	PCNXL2	chr1:233231401:-	-
chr7:150820668-150820730:mpeak_73549|chr7_150782917_150840823_AGAP3_NM_+|	145.257	-1.5259	1.51134	-1.00963	0.31267	0.999521	89.0837	123.59	361.255	146.14	131.661	157.152	37.8186	326.728	215.749	50.9968	41.9578	60.9515	98.9028	0.400014	1.91474	-1.51473	AGAP3	chr7:150820725:+	chr7_151123591_+;chr7_151123638_+
chr5:65339959-65340156:mpeak_61597|chr5_65222381_65374250_ERBB2IP_NM_+|	95.3954	2.71037	2.16671	1.25092	0.210965	0.984848	3.36165	25.1675	476.656	2.28344	13.0214	1.46871	8.40412	261.562	240.837	28.9235	43.4046	39.6552	98.9001	4.91255	2.18948	2.72307	ERBB2IP	-	chr5_66044193_+
chr13:98009597-98009651:mpeak_22149|chr13_97874542_98043575_MBNL2_NM_+|	48.5226	5.9203	3.1011	1.9091	NA	NA	0	0	125.436	0	0	0	10.9254	18.4262	351.22	27.4012	22.4257	26.4368	98.8795	Inf	2.3191	Inf	MBNL2	-	-
chr17:41569582-41569667:mpeak_33478|chr17_41561284_41603863_DHX8_NM_+|	21.6597	0.780897	1.79406	0.435268	0.663368	0.999521	7.56371	45.8408	65.2266	10.656	9.40434	7.34355	25.2124	54.8292	0	7.61146	13.7448	12.484	98.8079	2.11403	1.24201	0.87202	DHX8	-	-
chr17:8413123-8413263:mpeak_31993|chr17_8379266_8534079_MYH10_NM_-|	361.621	0.638343	2.07555	0.307554	0.758422	0.999521	33.6165	84.9404	1916.66	55.5636	18.8087	19.8276	43.7014	191.453	1826.34	45.6687	44.8515	58.0141	98.725	4.43331	3.79483	0.638486	MYH10	chr17:8413129:-	chr17_8509815_-;chr17_8509832_-;chr17_8509910_-
chr15:91525139-91525232:mpeak_27944|chr15_91510432_91537881_PRC1_NM_-|	194.455	1.10223	1.81241	0.608157	0.543083	0.999521	289.102	172.577	351.22	162.124	106.341	126.309	384.068	164.937	0	98.9489	258.258	219.572	98.7117	1.04205	-0.0711975	1.11325	PRC1	-	-
chr14:58988940-58988998:mpeak_23787|chr14_58894102_59014498_KIAA0586_NM_+|	5.44325	-0.271234	2.38021	-0.113954	0.909275	NA	1.68082	16.6285	0	0	7.95752	0.734355	5.88289	17.078	5.01743	2.28344	1.44682	6.6092	98.162	1.07484	1.43615	-0.361304	KIAA0586	chr14:58988991:+	chr14_58522272_+
chr12:122407821-122407872:mpeak_20361|chr12_122356462_122441557_WDR66_NM_+|	27.3198	-16.3994	3.25858	-5.03267	NA	NA	3.36165	205.385	0	4.56687	4.34046	3.67178	0	106.513	0	0	0	0	97.9916	4.05265	Inf	-Inf	WDR66	chr12:122407872:+	chr12_121969965_+
chr8:109455867-109455938:mpeak_76107|chr8_109455852_109498740_EMC2_NM_+|	55.093	0.19429	1.6686	0.116439	0.907305	0.999521	42.0206	46.2903	5.01743	79.1591	52.0856	86.6539	68.0734	22.471	5.01743	38.8184	122.98	92.5288	97.6627	-1.22327	-1.41218	0.188908	EMC2	-	chr8_108443695_+
chr2:225376090-225376314:mpeak_46313|chr2_225339093_225450114_CUL3_NM_-|	161.34	1.25973	2.10878	0.597377	0.550256	0.999521	8.40412	17.5274	837.911	19.7898	16.6384	17.6245	24.372	103.367	757.632	40.3407	52.0856	40.3895	97.5685	3.99833	2.73685	1.26147	CUL3	-	chr2_224511444_-;chr2_224511560_-
chr13:67539584-67539638:mpeak_21840|chr13_66879160_67804468_PCDH9_NM_-|	68.96	18.4546	5.90017	3.12781	NA	NA	0	0	401.394	0	0	0	0	0	411.429	1.52229	2.89364	10.281	97.561	Inf	4.80706	Inf	PCDH9	-	-
chr6:168291537-168291597:mpeak_69518|chr6_168227670_168370461_MLLT4_NM_+|	155.911	3.12763	2.29469	1.36299	0.172887	0.946336	5.04247	10.7861	822.859	9.89489	0	7.34355	42.0206	321.335	496.726	47.191	62.9367	44.7957	97.5125	5.60443	2.47292	3.13151	MLLT4	-	-
chr17:38487772-38487833:mpeak_33218|chr17_38465422_38512260_RARA_NM_+|	11.095	5.05835	2.63959	1.91634	0.055322	NA	0	22.9204	0	0	0	0	23.5315	37.3019	10.0349	17.5063	12.298	9.54662	97.0269	Inf	0.848741	Inf	RARA	chr17:38487832:+	chr17_40331579_+
chr20:9692033-9692088:mpeak_47213|chr20_9520264_9819687_PAK7_NM_-|	100.349	4.94467	6.00728	0.823114	NA	NA	0	0	592.057	0	0	0	0	0	612.126	0	0	0	96.7213	Inf	Inf	NaN	PAK7	-	-
chr17:76794969-76795048:mpeak_35306|chr17_76794633_76836969_USP36_NM_-|	16.387	1.84115	2.32202	0.792908	0.427831	0.999521	6.7233	37.7513	70.244	0.761146	12.298	5.14049	0	39.549	0	3.04458	10.8512	10.281	96.6891	2.65612	0.710021	1.9461	USP36	chr17:76794989:-	-
chr9:135533461-135533525:mpeak_79961|chr9_135470499_135545788_DDX31_NM_-|	8.95239	-2.51755	2.03435	-1.23752	0.215894	NA	9.24454	21.5722	0	3.80573	11.5746	7.34355	3.36165	39.549	5.01743	3.04458	1.44682	1.46871	96.4468	0.439504	3.00746	-2.56795	DDX31	chr9:135533415:-;chr9:135533470:-	chr9_132658030_-;chr9_132658084_-
chr12:72955965-72956016:mpeak_18872|chr12_72666528_73056831_TRHDE_NM_+|	2.05984	-0.0501329	4.63835	-0.0108084	0.991376	NA	0	12.1343	0	0	0	0	0	12.5838	0	0	0	0	96.4286	Inf	Inf	NaN	TRHDE	-	-
chr14:73577534-73577621:mpeak_24316|chr14_73525220_73586420_RBM25_NM_+|	145.966	-0.403757	1.89051	-0.21357	0.830882	0.999521	42.861	73.2554	657.283	27.4012	43.4046	27.9055	21.0103	78.6485	702.44	19.7898	28.213	29.3742	96.422	2.96993	3.3738	-0.403877	RBM25	chr14:73577616:+	chr14_73110858_+;chr14_73110888_+;chr14_73110962_+
chr10:113940303-113940360:mpeak_11632|chr10_113913424_113943537_GPAM_NM_-|	5.23684	0.766309	2.19666	0.348853	0.7272	NA	0.840412	13.932	0	7.61146	2.89364	1.46871	5.88289	9.43782	0	7.61146	3.61705	9.54662	96.4213	0.303025	-0.439375	0.7424	GPAM	chr10:113940306:-	-
chr17:78247103-78247209:mpeak_35386|chr17_78234659_78367144_RNF213_NM_+|	64.5501	0.28773	2.02343	0.142199	0.886923	0.999521	15.1274	204.037	0	28.1624	18.0853	27.9055	90.7645	240.44	10.0349	39.5796	57.8729	42.5926	96.3389	1.56343	1.28489	0.278539	RNF213	-	chr17_80273402_+
chr4:140450258-140450382:mpeak_59560|chr4_140417675_140477923_SETD7_NM_-|	11.6142	0.182858	2.21932	0.0823938	0.934334	NA	31.0953	2.69652	5.01743	35.0127	8.68093	17.6245	13.4466	0	0	6.08916	7.95752	11.7497	96.2058	-0.659915	-0.939927	0.280011	SETD7	-	chr4_139529123_-
chr6:88305102-88305167:mpeak_67774|chr6_88299784_88376735_ORC3_NM_+|	16.0987	-2.37714	1.99902	-1.18915	0.234379	0.999521	20.1699	16.6285	0	20.5509	55.7026	22.0307	5.04247	33.2571	0	4.56687	12.298	2.93742	96.0806	-1.41732	0.951661	-2.36898	ORC3	chr6:88305161:+	chr6_87595442_+
chr2:11721196-11721402:mpeak_40601|chr2_11674241_11780416_GREB1_NM_+|	43.7939	-1.6829	2.25174	-0.747378	0.454836	0.999521	36.9781	0	0	50.9968	64.3836	76.3729	102.53	8.08956	5.01743	46.4299	74.5113	60.2171	95.9331	-2.37451	-0.647644	-1.72686	GREB1	chr2:11721329:+;chr2:11721391:+	chr2_11581202_+;chr2_11581264_+
chr8:17804672-17804759:mpeak_74040|chr8_17780365_17885145_PCM1_NM_+|	27.0478	3.44312	2.07976	1.65554	0.0978151	0.787292	7.56371	0.44942	95.3312	2.28344	2.89364	3.67178	5.88289	32.3582	70.244	47.9522	39.7876	16.1558	95.2613	3.54582	0.0623631	3.48346	PCM1	-	chr8_17947222_+
chr12:50419100-50419238:mpeak_17776|chr12_50384126_50419307_RACGAP1_NM_-|	72.9099	0.159311	1.89156	0.0842224	0.93288	0.999521	82.3604	142.466	5.01743	133.2	58.5963	79.3104	90.7645	70.1095	0	37.2961	78.1284	97.6692	95.248	-0.238208	-0.405557	0.167348	RACGAP1	-	chr12_50025428_-
chr8:30608979-30609043:mpeak_74380|chr8_30601681_30623742_UBXN8_NM_+|	64.8079	-0.653441	1.86947	-0.349534	0.726689	0.999521	60.5097	127.186	5.01743	143.857	88.2561	78.576	50.4247	84.4909	0	24.3567	66.5538	48.4674	95.2264	-0.689016	-0.0469438	-0.642072	UBXN8	-	chr8_30751518_+
chr7:105139182-105139305:mpeak_72430|chr7_105098373_105162685_PUS7_NM_-|	5.05817	3.39395	2.94556	1.15222	0.249229	NA	0	9.43782	0	0	1.44682	0	18.4891	1.34826	0	1.52229	12.298	16.1558	95.1521	2.70557	-0.595594	3.30116	PUS7	-	-
chrX:138845470-138845532:mpeak_82586|chrX_138811121_138914447_ATP11C_NM_-|	42.9083	3.49723	3.054	1.14513	0.252155	0.999521	0	0	120.418	0	0	0	17.6487	40.8972	321.116	5.32802	3.61705	5.87484	95.1519	Inf	4.6791	Inf	ATP11C	-	chrX_139763370_-
chr5:77339248-77339489:mpeak_62006|chr5_77298879_77590579_AP3B1_NM_-|	23.55	1.00806	1.79843	0.560524	0.575122	0.999521	59.6693	13.932	35.122	14.4618	6.5107	18.3589	62.1905	14.3814	0	10.656	27.4896	19.8276	94.659	1.46691	0.401429	1.06548	AP3B1	-	chr5_78043431_-
chr6:151914350-151914528:mpeak_69154|chr6_151815174_151939081_CCDC170_NM_+|	57.1171	-0.900901	2.40024	-0.375337	0.70741	0.999521	26.8932	0	0	121.022	42.6812	53.6079	79.8392	0.44942	5.01743	117.216	96.2136	142.465	94.5767	-3.01445	-2.06073	-0.953718	CCDC170	-	-
chr1:35853041-35853147:mpeak_1769|chr1_35734567_35885070_ZMYM4_NM_+|	67.4067	0.676989	1.93191	0.350425	0.726019	0.999521	16.8082	16.1791	275.959	35.7738	17.3619	11.0153	6.7233	74.1543	245.854	28.1624	41.2344	39.6552	94.5565	2.26781	1.58309	0.68472	ZMYM4	-	-
chr5:64846284-64846364:mpeak_61554|chr5_64814460_64858995_CENPK_NM_-|	16.7824	-1.91168	1.82543	-1.04725	0.294984	0.999521	15.1274	18.4262	0	21.3121	56.426	25.7024	25.2124	10.3367	0	9.89489	9.40434	9.54662	94.3869	-1.62426	0.301446	-1.92571	CENPK	chr5:64846294:-	chr5_65550468_-
chr12:53938633-53938683:mpeak_18052|chr12_53901811_54020199_ATF7_NR_-mpeak_18052|chr12_53911138_54020199_ATF7_NM_-||	32.5283	3.24149	3.20642	1.01094	0.312046	0.999521	0	0	90.3137	0	0	0	2.52124	8.9884	275.959	4.56687	5.78729	2.20307	94.2508	Inf	4.51681	Inf	ATF7	-	-
chr18:33606848-33607007:mpeak_36408|chr18_33573263_33647557_RPRD1A_NM_-|	119.525	1.5046	1.75062	0.859466	0.390084	0.999521	42.861	28.7629	376.307	42.6242	47.7451	36.7178	32.7761	71.4578	371.29	89.054	130.937	163.761	94.1974	1.81746	0.309341	1.50812	RPRD1A	chr18:33606855:-	chr18_36026894_-
chrX:80532474-80532588:mpeak_81730|chrX_80457302_80552693_SH3BGRL_NM_+|	64.4035	2.03381	1.95915	1.03811	0.29922	0.999521	44.5419	1.34826	85.2963	76.1146	23.1491	35.9834	66.3926	26.5158	0	109.605	154.087	149.808	94.1332	-0.0439794	-2.15401	2.11003	SH3BGRL	-	-
chr10:112362229-112362327:mpeak_11598|chr10_112327448_112363988_SMC3_NM_+|	15.0208	3.99584	2.45835	1.62542	0.104074	0.804944	0	6.7413	45.1569	0.761146	1.44682	1.46871	1.68082	53.481	0	6.85031	32.5535	30.1086	94.0835	3.81921	-0.3336	4.15281	SMC3	-	-
chr13:53042414-53042485:mpeak_21771|chr13_53029494_53049029_CKAP2_NM_+|	19.3259	0.403763	2.11358	0.191033	0.8485	0.999521	17.6487	33.7065	0	25.879	7.95752	18.3589	1.68082	53.0315	0	15.9841	23.1491	34.5147	93.8639	-0.0234123	-0.428777	0.405365	CKAP2	-	chr13_52468340_+
chr1:227826403-227826454:mpeak_7975|chr1_227751219_227864879_ZNF678_NR_+mpeak_7975|chr1_227751219_227842036_ZNF678_NM_+||	1.41472	2.8144	4.5988	0.611985	0.540548	NA	0	6.7413	0	0	0	0	0	7.19072	0	3.04458	0	0	93.75	Inf	1.23989	Inf	ZNF678	-	-
chr4:73413466-73413524:mpeak_58237|chr4_73149421_73434516_ADAMTS3_NM_-|	2.2471	-0.0920949	4.58605	-0.0200815	0.983978	NA	0	13.0332	0	0	0	0	0	13.932	0	0	0	0	93.5484	Inf	Inf	NaN	ADAMTS3	chr4:73413467:-	chr4_72547750_-
chr5:138661048-138661249:mpeak_63574|chr5_138609440_138665033_MATR3_NM_+|	556.388	0.0599947	1.82703	0.0328373	0.973804	0.999521	236.156	116.4	2403.35	183.436	132.384	144.668	309.272	168.982	2468.58	173.541	153.363	186.526	93.521	2.58129	2.52092	0.0603672	MATR3	-	chr5_139325431_+;chr5_139325505_+;chr5_139325564_+
chr7:150734590-150734685:mpeak_73539|chr7_150725508_150742295_ABCB8_NM_+|	15.4846	-0.829765	1.91413	-0.433494	0.664656	0.999521	16.8082	36.8524	0	15.2229	8.68093	22.765	20.1699	37.3019	0	8.3726	12.298	7.34355	93.3688	0.201405	1.0367	-0.835293	ABCB8	chr7:150734646:+;chr7:150734675:+;chr7:150734703:+	chr7_151037495_+;chr7_151037587_+
chr8:53548563-53548618:mpeak_74845|chr8_53536419_53627026_RB1CC1_NM_-|	8.84402	0.485772	2.34351	0.207284	0.835788	NA	0.840412	12.5838	0	6.08916	26.0428	15.4215	0	7.19072	0	15.9841	3.61705	18.3589	93.3437	-1.82472	-2.40027	0.575556	RB1CC1	-	-
chr1:158985691-158985782:mpeak_5868|chr1_158979681_159024610_IFI16_NM_+|	4.19459	-0.101428	6.03399	-0.0168094	NA	NA	0	24.2687	0	0	0	0	0	26.0664	0	0	0	0	93.1034	Inf	Inf	NaN	IFI16	chr1:158985777:+	chr1_159015987_+
chr9:131004562-131004627:mpeak_79626|chr9_130965633_131016287_DNM1_NM_+|	14.765	-0.24521	2.40882	-0.101797	0.918918	0.999521	1.68082	10.3367	65.2266	0	0	8.81226	8.40412	9.43782	65.2266	1.52229	5.06388	1.46871	92.9884	3.13184	3.36637	-0.234528	DNM1	-	chr9_128242345_+
chr5:34915805-34916012:mpeak_60943|chr5_34915819_34925330_BRIX1_NM_+|	33.2569	-0.176037	2.02535	-0.0869166	0.930738	0.999521	12.6062	79.9967	0	62.4139	23.1491	20.5619	46.2227	53.481	0	20.5509	44.8515	35.2491	92.8782	-0.196635	-0.0136499	-0.182985	BRIX1	-	chr5_34915786_+
chr12:24690906-24690969:mpeak_17072|chr12_23687456_24715383_SOX5_NM_-|	33.8677	-0.107105	6.00966	-0.0178222	0.985781	0.999521	0	0	195.68	0	0	0	0	0	210.732	0	0	0	92.8571	Inf	Inf	NaN	SOX5	-	-
chr3:108366912-108366969:mpeak_54028|chr3_108308336_108412206_DZIP3_NM_+|	13.2435	2.28809	2.24873	1.0175	0.308914	0.999521	3.36165	4.94362	45.1569	7.61146	5.78729	0	3.36165	35.0548	0	9.13375	18.8087	25.7024	92.7766	1.99642	-0.481718	2.47814	DZIP3	chr3:108366921:+	chr3_108648073_+
chr7:93516563-93516669:mpeak_71954|chr7_93516208_93520303_TFPI2_NM_-|	104.259	-0.0946186	2.88495	-0.0327973	NA	NA	5.04247	590.538	0	2.28344	0.723411	3.67178	1.68082	640.423	0	4.56687	1.44682	0.734355	92.7545	6.4786	6.57219	-0.0935917	TFPI2	-	chr7_93887266_-
chr4:140291359-140291524:mpeak_59533|chr4_140222675_140309037_NAA15_NM_+|	177.323	1.28579	2.02296	0.635599	NA	NA	21.8507	33.7065	832.893	24.3567	27.4896	25.7024	32.7761	57.0763	868.015	66.2197	66.5538	71.2325	92.7529	3.51812	2.23122	1.2869	NAA15	-	chr4_139370232_+;chr4_139370299_+;chr4_139370342_+;chr4_139370368_+
chr9:15472622-15472741:mpeak_77326|chr9_15465578_15511003_PSIP1_NM_-|	43.3188	1.39478	1.7745	0.786012	0.431861	0.999521	19.3295	22.471	120.418	29.6847	14.4682	35.9834	48.7439	67.8624	0	47.191	58.5963	55.0766	92.7444	1.01741	-0.464195	1.48161	PSIP1	-	chr9_15472631_-
chr12:2664932-2664983:mpeak_16349|chr12_2162415_2800065_CACNA1C_NM_+|	120.898	14.35	6.00708	2.38885	NA	NA	0	0	697.423	0	0	0	0	0	752.615	0	0	0.734355	92.6667	Inf	10.0012	Inf	CACNA1C	-	-
chr5:134258979-134259406:mpeak_63379|chr5_134240809_134296275_PCBD2_NM_+|	40.3874	1.22671	1.7581	0.697747	0.485335	0.999521	20.1699	33.2571	0	22.0732	29.6598	22.0307	68.0734	13.4826	5.01743	76.1146	86.0859	108.685	92.5693	-0.465343	-1.64568	1.18034	PCBD2	-	-
chr9:37881884-37881947:mpeak_77846|chr9_37880745_37904350_SLC25A51_NR_-|	16.9545	0.100001	1.81822	0.0549994	0.956139	0.999521	15.9678	15.7297	0	14.4618	23.1491	26.4368	24.372	9.88724	0	17.5063	39.7876	16.1558	92.5227	-1.01478	-1.10027	0.0854902	SLC25A51	chr9:37881890:-	chr9_37881894_-;chr9_37881951_-
chr18:18547778-18547908:mpeak_36056|chr18_18531348_18691812_ROCK1_NM_-|	220.754	-0.192001	2.29167	-0.0837822	NA	NA	20.1699	19.3251	1148.99	24.3567	26.7662	38.9208	5.88289	35.0548	1244.32	16.7452	34.0003	34.5147	92.4705	3.72236	3.91404	-0.191688	ROCK1	-	chr18_20967848_-
chrX:67290804-67290857:mpeak_81386|chrX_67267005_67653299_OPHN1_NM_-|	4.41518	-4.14838	2.9514	-1.40556	0.159855	NA	13.4466	2.69652	10.0349	14.4618	2.17023	0.734355	0	9.43782	0	0	0	0	92.4577	0.592059	Inf	-Inf	OPHN1	-	-
chr17:18811986-18812044:mpeak_32324|chr17_18759611_18833852_PRPSAP2_NM_+|	141.239	3.59027	1.96705	1.8252	0.0679708	0.708979	13.4466	8.08956	577.004	7.61146	10.1278	13.9527	147.072	65.1659	436.516	98.1878	164.214	153.48	92.26	4.23926	0.641497	3.59776	PRPSAP2	-	chr17_18908729_+
chr11:440492-440558:mpeak_12247|chr11_418589_442011_ANO9_NM_-|	7.31976	0.823697	2.32621	0.354095	0.723268	NA	17.6487	4.4942	15.0523	14.4618	5.06388	2.20307	13.4466	0	0	5.32802	9.40434	0.734355	92.2046	0.775512	-0.201926	0.977438	ANO9	-	-
chr17:53496967-53497085:mpeak_34113|chr17_53471895_53499341_MMD_NM_-|	6.04034	2.2841	2.35833	0.968522	0.332784	NA	0	8.08956	0	0.761146	2.17023	1.46871	12.6062	4.94362	0	7.61146	27.4896	7.34355	92.1897	0.878528	-1.27413	2.15266	MMD	chr17:53496969:-;chr17:53497026:-	chr17_55419609_-;chr17_55419646_-;chr17_55419719_-
chr11:59419012-59419070:mpeak_13644|chr11_59405884_59436511_PATL1_NM_-|	115.024	4.01737	2.14071	1.87665	0.0605663	0.682923	13.4466	3.14594	536.865	9.89489	1.44682	0.734355	76.4775	193.7	331.15	50.2356	86.0859	77.1073	92.0392	5.51825	1.4944	4.02385	PATL1	-	chr11_59651544_-
chr11:84731986-84732180:mpeak_14978|chr11_83170967_85338314_DLG2_NM_-|	172.279	-17.9578	3.33723	-5.38104	NA	NA	25.2124	13.932	1434.99	22.0732	15.1916	19.0932	0	0	536.865	0	0	0	91.527	4.7091	Inf	-Inf	DLG2	-	-
chr14:38063600-38063687:mpeak_23164|chr14_38061916_38064325_FOXA1_NM_-|	5.41951	1.62738	2.23095	0.729456	0.465723	NA	15.1274	0.44942	0	2.28344	2.17023	2.93742	13.4466	3.59536	0	5.32802	8.68093	11.0153	91.4029	1.07554	-0.554238	1.62978	FOXA1	chr14:38063600:-;chr14:38063660:-	chr14_37594416_-;chr14_37594457_-
chr3:97599913-97599970:mpeak_53756|chr3_97540883_97662069_CRYBG3_NM_+|	2.43436	-0.127917	4.54216	-0.0281622	0.977533	NA	0	13.932	0	0	0	0	0	15.2803	0	0	0	0	91.1765	Inf	Inf	NaN	CRYBG3	-	-
chr12:99018021-99018251:mpeak_19359|chr12_99008118_99038829_IKBIP_NM_-|	29.1806	0.829378	1.96677	0.421696	0.673247	0.999521	19.3295	66.9636	0	12.9395	17.3619	27.1711	27.7336	66.9636	0	35.0127	27.4896	49.2018	91.1253	0.586373	-0.238289	0.824662	IKBIP	chr12:99018027:-;chr12:99018110:-	chr12_98624223_-;chr12_98624282_-;chr12_98624304_-
chr5:140038514-140038702:mpeak_63696|chr5_140027383_140041886_IK_NM_+|	104.373	-0.593267	1.88488	-0.31475	0.752951	0.999521	126.902	225.159	10.0349	175.825	127.32	117.497	131.945	133.028	0	49.4745	74.5113	80.7791	91.1027	-0.216218	0.371877	-0.588095	IK	-	chr5_140659073_+;chr5_140659107_+;chr5_140659147_+
chr12:123801827-123801912:mpeak_20509|chr12_123780597_123834988_SBNO1_NM_-|	41.1675	1.9016	1.85312	1.02616	0.304815	0.999521	6.7233	13.4826	115.401	8.3726	17.3619	13.2184	23.5315	120.445	5.01743	50.9968	64.3836	55.0766	91.0152	1.79963	-0.194158	1.99379	SBNO1	-	-
chr4:142153668-142153724:mpeak_59612|chr4_142142040_142154868_ZNF330_NM_+|	54.6324	1.6501	1.65719	0.995722	0.319385	0.999521	26.8932	15.2803	145.505	15.9841	4.34046	36.7178	46.2227	100.221	60.2092	71.5477	65.107	67.5607	90.8186	1.71816	0.0171154	1.70105	ZNF330	-	-
chr7:99923280-99923338:mpeak_72179|chr7_99918707_99933930_PMS2P1_NR_-|	20.3074	1.54459	1.85802	0.83131	0.405798	0.999521	16.8082	1.79768	0	21.3121	10.1278	3.67178	17.6487	8.08956	5.01743	72.3088	31.8301	55.0766	90.7439	-0.916186	-2.37206	1.45587	PMS2P1	chr7:99923283:-	-
chr13:72199162-72199311:mpeak_21858|chr13_72014824_72441330_DACH1_NM_-|	76.5158	5.85079	6.00766	0.973888	NA	NA	0	0	436.516	0	0	0	0	0	481.673	0	0	0	90.625	Inf	Inf	NaN	DACH1	-	-
chr2:42488216-42488429:mpeak_41468|chr2_42396477_42556873_EML4_NM_+|	103.571	3.97841	2.44336	1.62826	0.103471	0.802255	0	1.34826	366.272	7.61146	1.44682	0.734355	90.7645	91.2322	426.482	56.3248	86.8093	113.825	90.6246	5.23038	1.24367	3.98671	EML4	-	chr2_42261289_+
chr14:51237149-51237287:mpeak_23416|chr14_51190390_51297839_NIN_NM_-|	7.84357	-1.75041	1.97579	-0.885929	0.375656	NA	6.7233	8.53898	0	17.5063	13.0214	16.1558	3.36165	13.4826	0	1.52229	9.40434	4.40613	90.6082	-1.61294	0.135638	-1.74858	NIN	-	-
chr12:133518710-133518839:mpeak_20790|chr12_133503748_133532892_ZNF605_NM_-|	4.42668	1.94797	2.7696	0.703342	0.481843	NA	0	10.3367	0	0	0.723411	1.46871	0.840412	22.0216	0	6.08916	7.23411	4.40613	90.4266	2.23737	0.366807	1.87056	ZNF605	chr12:133518706:-;chr12:133518788:-	chr12_132942102_-;chr12_132942137_-;chr12_132942202_-
chr17:80378383-80378441:mpeak_35565|chr17_80376251_80400052_HEXDC_NM_+|	5.1001	2.75545	2.79613	0.985452	0.324402	NA	0	12.1343	0	0	1.44682	0	6.7233	20.2239	0	5.32802	5.06388	10.281	90.0601	3.06814	0.382396	2.68574	HEXDC	chr17:80378435:+	chr17_82420562_+
chr3:35748435-35748559:mpeak_52275|chr3_35680665_35835192_ARPP21_NM_+|	87.3869	5.80198	6.00746	0.965796	NA	NA	0	0	496.726	0	0	0	0	0	551.917	0	0	0	90	Inf	Inf	NaN	ARPP21	-	chr3_35706947_+
chr2:213400738-213400878:mpeak_45978|chr2_212248785_213403352_ERBB4_NM_-|	132.08	3.94293	5.07037	0.777642	NA	NA	0	0.44942	1008.5	0	0	1.46871	0	0	561.952	3.80573	2.17023	6.6092	89.7721	9.42409	5.48065	3.94344	ERBB4	-	-
chr8:23086104-23086167:mpeak_74162|chr8_23082733_23087460_LOC389641_NR_+|	5.35681	-0.255383	2.31107	-0.110504	0.912009	NA	0	7.64014	0	3.80573	7.23411	3.67178	13.4466	3.59536	0	4.56687	15.915	4.40613	89.6627	-0.945285	-0.546362	-0.398923	LOC389641	chr8:23086164:+	chr8_23228650_+
chr20:36766320-36766564:mpeak_47923|chr20_36758771_36793700_TGM2_NM_-|	50.7319	-15.0899	5.59421	-2.69742	NA	NA	0	139.77	0	0.761146	0	0	1.68082	461.554	5.01743	0	0	0	89.5476	7.52066	Inf	-Inf	TGM2	chr20:36766314:-;chr20:36766345:-;chr20:36766449:-;chr20:36766510:-	chr20_38137883_-;chr20_38137944_-;chr20_38138049_-;chr20_38138069_-;chr20_38138111_-;chr20_38138134_-
chr3:3172245-3172367:mpeak_51423|chr3_3168599_3189589_TRNT1_NM_+|	29.416	0.715342	1.70928	0.418506	0.675577	0.999521	39.4994	13.932	0	9.89489	27.4896	19.0932	31.9357	48.5373	10.0349	36.535	47.7451	68.295	88.5526	-0.0799947	-0.753405	0.67341	TRNT1	chr3:3172351:+	-
chr21:17203753-17203956:mpeak_49043|chr21_17102343_17250621_USP25_NM_+|	7.34196	-1.0825	2.26595	-0.477724	0.632847	NA	7.56371	17.078	0	8.3726	6.5107	8.81226	0	17.9768	10.0349	0.761146	1.44682	9.54662	87.9693	0.056483	1.2528	-1.19632	USP25	-	chr21_15831484_+;chr21_15831522_+
chr2:136102688-136102763:mpeak_44174|chr2_135958010_136288806_ZRANB3_NM_-|	8.45428	-3.35665	2.51877	-1.33265	0.182646	NA	19.3295	3.59536	0	15.9841	25.3194	20.5619	0	13.0332	0	0	2.89364	0.734355	87.948	-1.43222	1.84494	-3.27716	ZRANB3	chr2:136102691:-	chr2_135345118_-
chr10:13633835-13633893:mpeak_9094|chr10_13628938_13672259_PRPF18_NM_+|	11.2572	1.53226	2.1572	0.7103	0.477518	NA	9.24454	0	0	6.08916	4.34046	3.67178	7.56371	13.4826	0	26.6401	37.6174	26.4368	87.8495	-0.609166	-2.10744	1.49828	PRPF18	-	-
chr9:5093227-5093422:mpeak_77139|chr9_4985244_5126683_JAK2_NM_+|	17.128	-0.843931	2.21529	-0.380957	0.703235	0.999521	42.0206	0.89884	15.0523	47.191	23.8726	30.8429	0	22.0216	0	7.61146	8.68093	7.34355	87.7499	-0.813824	-0.102064	-0.71176	JAK2	chr9:5093277:+	chr9_5093278_+
chrX:67290473-67290523:mpeak_81385|chrX_67267005_67653299_OPHN1_NM_-|	3.16607	-1.98807	3.20023	-0.621228	0.53445	NA	13.4466	1.34826	10.0349	1.52229	0	2.20307	0	9.43782	0	0	0	0	87.6958	2.73662	Inf	-Inf	OPHN1	-	-
chr5:147024410-147024504:mpeak_63971|chr5_146971249_147162411_JAKMIP2_NM_-|	51.0105	5.51329	6.00846	0.917588	NA	NA	0	0	285.994	0	0	0	0	0	326.133	0	0	0	87.6923	Inf	Inf	NaN	JAKMIP2	-	chr5_147644855_-
chr5:78693343-78693460:mpeak_62060|chr5_78672020_78809659_HOMER1_NM_-|	22.4876	0.314444	1.76214	0.178444	0.858374	0.999521	26.0528	6.29188	0	31.207	10.8512	17.6245	36.9781	13.4826	5.01743	50.2356	39.0642	33.046	87.4524	-0.883784	-1.14097	0.257188	HOMER1	chr5:78693349:-	chr5_79397553_-
chr15:78883662-78883971:mpeak_27513|chr15_78857861_78885433_CHRNA5_NM_+|	24.3134	-1.37905	1.9368	-0.712022	0.476451	0.999521	53.7864	16.1791	0	37.2961	29.6598	31.5773	38.659	41.3466	0	6.08916	18.8087	18.3589	87.4508	-0.493967	0.887176	-1.38114	CHRNA5	chr15:78883797:+;chr15:78883882:+;chr15:78883968:+	chr15_78591454_+;chr15_78591562_+;chr15_78591622_+
chr2:136528142-136528310:mpeak_44200|chr2_136499188_136540318_UBXN4_NM_+|	102.134	0.810068	1.70628	0.474757	0.63496	0.999521	34.4569	23.3698	336.168	23.5955	28.213	74.1699	92.4454	72.3566	285.994	63.9362	99.1073	91.7944	87.3998	1.645	0.822893	0.822106	UBXN4	-	chr2_135770572_+;chr2_135770659_+;chr2_135770691_+
chr10:95241853-95241918:mpeak_10976|chr10_95066758_95242074_MYOF_NM_-|	65.325	0.81834	1.77725	0.460454	0.64519	0.999521	142.03	173.476	35.122	25.1178	26.7662	18.3589	104.211	163.589	0	29.6847	36.1705	29.3742	87.286	2.31952	1.49168	0.82784	MYOF	chr10:95241853:-	-
chr21:30402912-30403041:mpeak_49178|chr21_30396937_30426386_USP16_NM_+|	15.1335	2.75556	2.01564	1.36709	0.171598	0.946336	3.36165	0.89884	40.1394	7.61146	3.61705	2.93742	15.9678	17.9768	0	22.8344	37.6174	28.6399	87.2007	1.64813	-1.39211	3.04024	USP16	-	-
chr7:131147968-131148062:mpeak_73018|chr7_130794854_131172365_MKLN1_NM_+|	47.0353	3.25216	1.98132	1.64141	0.100712	0.798917	7.56371	6.29188	180.627	3.80573	4.34046	3.67178	62.1905	155.949	5.01743	38.8184	52.0856	44.0613	87.1509	4.04059	0.725468	3.31512	MKLN1	-	chr7_131463293_+;chr7_131463325_+
chr19:36809557-36809618:mpeak_38852|chr19_36804224_36822620_LINC00665_NR_-|	4.26791	0.710553	2.42664	0.292814	0.769664	NA	0	6.7413	0	0.761146	4.34046	1.46871	10.0849	5.39304	0	13.7006	5.78729	2.93742	87.1082	0.0370627	-0.534911	0.571974	LINC00665	chr19:36809566:-;chr19:36809616:-	-
chr20:35412116-35412315:mpeak_47858|chr20_35406234_35492087_SOGA1_NM_-|	220.588	2.81667	2.81224	1.00157	0.316549	0.999521	0.840412	118.197	1103.83	0	2.17023	0	3.36165	16.1791	1384.81	4.56687	7.95752	5.14049	87.0774	9.13821	6.31288	2.82533	SOGA1	chr20:35412152:-;chr20:35412178:-;chr20:35412258:-	chr20_36783856_-;chr20_36783897_-
chr4:144449039-144449181:mpeak_59658|chr4_144434615_144474271_SMARCA5_NM_+|	369.455	1.99648	2.06635	0.966185	NA	NA	65.5522	25.6169	1826.34	21.3121	18.0853	16.1558	129.423	119.096	1956.8	39.5796	123.703	91.7944	86.9496	5.10922	3.11198	1.99724	SMARCA5	-	chr4_143528002_+
chr19:33460938-33461096:mpeak_38665|chr19_33370284_33462935_CEP89_NM_-|	3.4091	-2.35334	2.42067	-0.972186	0.330958	NA	3.36165	6.29188	0	9.13375	2.17023	5.14049	1.68082	9.43782	0	1.52229	2.17023	0	86.8229	-0.768474	1.5903	-2.35878	CEP89	-	-
chr2:17927133-17927228:mpeak_40677|chr2_17846880_17935096_SMC6_NM_-|	31.5091	1.96498	2.31138	0.850133	0.395251	0.999521	7.56371	1.79768	165.575	7.61146	2.89364	6.6092	0	29.2123	105.366	9.89489	18.0853	23.4994	86.6591	3.35356	1.38638	1.96718	SMC6	-	-
chr5:142689651-142689784:mpeak_63883|chr5_142661606_142815077_NR3C1_NM_-mpeak_63883|chr5_142661606_142815077_NR3C1_NM_-||	119.954	1.38938	1.87103	0.742576	0.457739	0.999521	8.40412	71.9072	471.638	14.4618	14.4682	32.3116	24.372	238.642	376.307	57.8471	58.5963	70.4981	86.3337	3.17195	1.77395	1.398	NR3C1	-	-
chr9:116355157-116355290:mpeak_79149|chr9_116207008_116359047_RGS3_NM_+|	5.8148	-1.15114	2.45893	-0.468146	0.63968	NA	0	13.0332	0	4.56687	2.17023	6.6092	4.20206	26.0664	0	1.52229	9.40434	2.20307	86.1173	-0.0342514	1.20498	-1.23923	RGS3	chr9:116355208:+;chr9:116355283:+	chr9_113592927_+;chr9_113593003_+
chr12:15813573-15813681:mpeak_16922|chr12_15774364_15942510_EPS8_NM_-|	115.19	0.876953	1.66387	0.527056	0.598155	0.999521	103.371	17.078	165.575	76.1146	80.2986	83.7165	263.889	48.5373	20.0697	201.704	127.32	194.604	86.0231	0.252322	-0.655203	0.907525	EPS8	-	-
chr8:38124495-38124568:mpeak_74522|chr8_38122122_38126738_PPAPDC1B_NM_-|	20.0562	0.0706674	1.79404	0.0393901	0.968579	0.999521	26.8932	14.8309	0	19.7898	23.1491	24.9681	26.0528	22.471	0	37.2961	20.2555	24.9681	85.9868	-0.702681	-0.766047	0.0633657	PPAPDC1B	chr8:38124500:-	chr8_38266984_-;chr8_38267020_-
chr1:183102631-183102695:mpeak_6653|chr1_182992594_183111668_LAMC1_NM_+|	169.848	0.460606	1.93385	0.238181	0.811741	0.999521	125.221	486.722	0	50.2356	21.7023	33.7803	196.656	750.531	120.418	79.9203	69.4474	103.544	85.9788	2.53317	2.07767	0.4555	LAMC1	-	chr1_183133548_+
chr9:2161681-2161846:mpeak_77078|chr9_2015218_2192703_SMARCA2_NM_+|	221.09	0.791414	2.02811	0.390221	0.696373	0.999521	31.0953	37.7513	1008.5	34.2516	40.511	31.5773	36.9781	93.9288	1123.9	53.2802	114.299	46.9987	85.8575	3.34073	2.5479	0.792836	SMARCA2	-	chr9_2161710_+;chr9_2161787_+;chr9_2161846_+
chr15:49097810-49097862:mpeak_26324|chr15_49031485_49103343_CEP152_NM_-|	11.1975	0.389858	2.12912	0.183108	0.854713	NA	1.68082	26.5158	0	19.0286	4.34046	5.87484	5.88289	26.9652	0	9.89489	21.7023	12.484	85.8394	-0.0526169	-0.424356	0.371739	CEP152	-	chr15_48805569_-;chr15_48805643_-
chr17:6553547-6553688:mpeak_31771|chr17_6547979_6554954_MED31_NM_-|	18.1948	-1.69333	1.92314	-0.880504	0.378586	0.999521	26.8932	20.2239	0	22.0732	37.6174	25.7024	10.0849	44.942	0	5.32802	15.1916	10.281	85.6255	-0.857868	0.837179	-1.69505	MED31	chr17:6553528:-;chr17:6553636:-	chr17_6650209_-;chr17_6650314_-
chr3:47328780-47328954:mpeak_52665|chr3_47324329_47385044_KLHL18_NM_+|	27.7772	-2.98347	1.70127	-1.75367	0.0794869	0.732547	35.2973	33.7065	0	38.8184	43.4046	36.7178	20.1699	30.5606	70.244	9.89489	11.5746	2.93742	85.56	-0.785496	2.30934	-3.09484	KLHL18	chr3:47328833:+;chr3:47328879:+;chr3:47328947:+	chr3_47287406_+;chr3_47287457_+
chr2:170667365-170667559:mpeak_44807|chr2_170655321_170668177_SSB_NM_+|	60.6335	-0.0197999	1.55159	-0.012761	0.989818	0.999521	98.3282	39.0995	15.0523	66.9808	46.2983	71.2325	115.977	47.1891	15.0523	57.8471	75.2347	79.3104	85.558	-0.275091	-0.253085	-0.0220054	SSB	-	chr2_169810868_+;chr2_169810884_+;chr2_169810928_+;chr2_169810966_+;chr2_169811039_+
chr1:144997031-144997083:mpeak_4754|chr1_144852499_145076186_PDE4DIP_NM_-|	4.86889	-3.14314	2.15303	-1.45987	0.144326	NA	2.52124	7.64014	0	8.3726	7.95752	9.54662	2.52124	10.3367	5.01743	3.04458	0	1.46871	85.2687	-1.34856	1.98572	-3.33428	PDE4DIP	-	-
chr9:125639740-125639805:mpeak_79361|chr9_125612101_125667562_RC3H2_NM_-|	62.3578	0.525521	2.09379	0.250991	NA	NA	5.88289	4.4942	270.941	19.7898	3.61705	27.1711	31.0953	28.3135	270.941	31.9681	17.3619	36.7178	85.1577	2.47562	1.94079	0.534836	RC3H2	-	chr9_122877475_-
chr20:47604873-47604934:mpeak_48323|chr20_47538274_47649559_ARFGEF2_NM_+|	38.0149	0.455351	1.83566	0.248058	0.804089	0.999521	63.8713	34.6053	0	28.1624	12.298	13.9527	77.3179	91.2322	5.01743	31.207	41.2344	57.2797	85.1052	0.855827	0.420085	0.435743	ARFGEF2	-	chr20_48988386_+
chr20:55088380-55088489:mpeak_48606|chr20_55043640_55093142_RTFDC1_NM_+|	539.547	-0.226359	1.81897	-0.124444	0.900964	0.999521	517.694	338.863	50.1743	996.34	611.282	637.42	536.183	524.922	5.01743	770.279	870.263	616.124	85.0494	-1.308	-1.08182	-0.226177	RTFDC1	chr20:55088484:+	chr20_56513423_+
chr15:52529673-52529827:mpeak_26539|chr15_52486251_52587995_MYO5C_NM_-|	38.3815	-0.79298	2.26947	-0.349412	0.72678	0.999521	53.7864	1.34826	0	73.07	83.1922	46.9987	63.0309	1.79768	0	26.6401	60.0431	50.6705	85.0468	-1.8823	-1.08319	-0.799109	MYO5C	-	-
chr1:17405522-17405581:mpeak_788|chr1_17395772_17445948_PADI2_NM_-|	6.00039	0.0347208	2.4964	0.0139083	0.988903	NA	8.40412	0	0	3.04458	5.78729	4.40613	19.3295	0.44942	0	15.9841	5.78729	8.81226	84.9807	-0.655516	-0.628796	-0.0267199	PADI2	chr1:17405529:-	chr1_17079036_-
chr15:32984453-32984509:mpeak_25690|chr15_32933869_32988714_SCG5_NM_+|	1.79768	-0.229722	4.72999	-0.0485671	0.961264	NA	0	9.88724	0	0	0	0	0	11.6849	0	0	0	0	84.6154	Inf	Inf	NaN	SCG5	chr15:32984505:+	chr15_32692284_+;chr15_32692302_+
chr19:38260856-38260925:mpeak_38952|chr19_38231095_38270230_ZNF573_NM_-|	2.59573	-2.12909	2.77462	-0.767347	0.442875	NA	3.36165	0	0	3.04458	6.5107	3.67178	1.68082	6.29188	0	0	1.44682	5.14049	84.329	-1.97625	0.27538	-2.25163	ZNF573	chr19:38260874:-	chr19_37770234_-
chr7:11486849-11486906:mpeak_70067|chr7_11415505_11871824_THSD7A_NM_-|	14.6342	-0.249826	6.01444	-0.0415376	0.966867	0.999521	0	0	80.2789	0	0	0	0	0	95.3312	0	0	0	84.2105	Inf	Inf	NaN	THSD7A	-	-
chr15:50757838-50757913:mpeak_26403|chr15_50716573_50791099_USP8_NM_+|	24.2805	1.59999	1.90727	0.838894	0.401529	0.999521	15.9678	0.44942	0	9.13375	21.7023	9.54662	13.4466	10.7861	5.01743	32.7293	96.2136	76.3729	84.1907	-1.29852	-2.81133	1.51281	USP8	chr15:50757899:+	chr15_50465700_+
chr1:67424600-67424674:mpeak_2942|chr1_67390577_67450254_MIER1_NM_+|	51.9795	1.43304	2.38108	0.601846	0.547277	0.999521	0.840412	1.79768	265.924	3.80573	1.44682	2.93742	5.88289	38.6501	275.959	4.56687	5.78729	16.1558	83.7968	5.03525	3.59568	1.43957	MIER1	-	chr1_66958981_+
chr2:20834479-20834541:mpeak_40727|chr2_20819005_20850864_HS1BP3_NM_-|	4.34122	0.133297	2.42781	0.0549043	0.956215	NA	15.1274	0.89884	0	0	2.17023	5.14049	9.24454	9.88724	0	3.80573	3.61705	2.20307	83.7678	1.13235	0.990985	0.141368	HS1BP3	chr2:20834476:-	chr2_20634719_-
chr15:72974612-72974667:mpeak_27262|chr15_72968728_72978490_HIGD2B_NR_-|	20.1702	-0.182512	2.0656	-0.0883581	0.929592	0.999521	30.2548	0.44942	0	25.879	26.0428	33.046	21.0103	15.7297	0	33.4904	26.7662	29.3742	83.5717	-1.46848	-1.28664	-0.181833	HIGD2B	-	-
chr12:122817538-122817695:mpeak_20407|chr12_122757647_122907116_CLIP1_NM_-|	9.78815	-0.312825	1.812	-0.172641	0.862934	NA	1.68082	4.4942	10.0349	25.1178	6.5107	15.4215	7.56371	5.39304	0	11.4172	18.8087	11.0153	83.4051	-1.53732	-1.67038	0.133062	CLIP1	-	chr12_122333143_-
chr11:16769648-16769718:mpeak_12810|chr11_16760147_16776417_C11orf58_NM_+|	226.173	1.05572	1.51692	0.695964	0.486451	0.999521	181.529	51.6833	265.924	200.181	109.235	149.074	359.696	198.644	40.1394	388.945	378.344	390.677	83.4007	0.122542	-0.952219	1.07476	C11orf58	-	chr11_16748137_+
chr5:131951682-131951817:mpeak_63187|chr5_131892615_131977869_RAD50_NM_+|	6.69136	1.03549	2.44598	0.423342	0.672046	NA	0	6.7413	0	5.32802	7.23411	6.6092	0	8.08956	0	11.4172	24.596	10.281	83.3333	-1.50785	-2.5167	1.00884	RAD50	-	-
chr16:58230629-58230757:mpeak_30082|chr16_58192257_58231782_CSNK2A2_NM_-|	118.415	-1.64006	1.66349	-0.985912	0.324176	0.999521	73.1159	229.654	220.767	74.5923	73.0645	46.9987	18.4891	118.197	491.708	15.9841	22.4257	35.9834	83.3133	1.42737	3.07843	-1.65106	CSNK2A2	-	chr16_58196726_-
chr3:150282666-150282775:mpeak_55394|chr3_150264573_150301632_EIF2A_NM_+|	41.3549	0.266536	1.90389	0.139996	0.888663	0.999521	54.6268	29.2123	0	43.3853	48.4685	35.9834	69.7542	31.01	0	37.2961	71.6177	74.9042	83.2033	-0.608613	-0.867295	0.258682	EIF2A	chr3:150282723:+;chr3:150282772:+	chr3_150564936_+
chr19:5595440-5595528:mpeak_37385|chr19_5587410_5622938_SAFB2_NM_-|	29.2744	-0.638308	1.97905	-0.322533	0.747049	0.999521	38.659	70.1095	0	19.7898	23.8726	19.0932	50.4247	80.8956	0	10.656	26.0428	11.7497	82.8268	0.793445	1.43857	-0.645121	SAFB2	-	chr19_5595449_-
chr14:102551033-102551348:mpeak_25188|chr14_102548158_102606086_HSP90AA1_NM_-|	4819.59	0.188125	1.63333	0.115179	0.908303	0.999521	4566.8	3366.16	1741.05	5203.95	4749.19	5387.23	5220.64	6316.6	155.54	7284.16	7110.4	6733.3	82.7349	-0.665149	-0.85353	0.188381	HSP90AA1	chr14:102551201:-;chr14:102551280:-	chr14_102084818_-;chr14_102084870_-;chr14_102084961_-;chr14_102084996_-
chr17:57161123-57161296:mpeak_34296|chr17_57060282_57184266_TRIM37_NM_-|	15.3514	2.02033	2.59532	0.778451	0.436303	0.999521	9.24454	0	0	0	2.17023	12.484	21.0103	1.34826	0	44.1464	60.7665	33.046	82.6934	-0.664649	-2.62534	1.96069	TRIM37	chr17:57161201:-	chr17_59083844_-
chr15:82523186-82523321:mpeak_27617|chr15_82422902_82555104_EFTUD1_NM_-|	11.4524	1.05596	1.91328	0.551913	0.581008	NA	5.88289	8.53898	40.1394	3.80573	5.06388	4.40613	26.0528	17.9768	0	3.80573	18.0853	3.67178	82.6131	2.03909	0.784429	1.25466	EFTUD1	-	-
chr4:95986958-95987027:mpeak_58789|chr4_95679127_96075698_BMPR1B_NM_+|	22.0579	1.2696	2.31594	0.548201	0.583554	0.999521	17.6487	0	0	3.04458	13.0214	14.6871	37.8186	4.94362	0	38.0573	73.7879	61.6858	82.5433	-0.801173	-2.02079	1.21961	BMPR1B	chr4:95987029:+	chr4_95065874_+
chr18:12697447-12697506:mpeak_35977|chr18_12662168_12702776_CEP76_NR_-mpeak_35977|chr18_12673502_12702776_CEP76_NM_-||	3.68158	-2.75223	3.00469	-0.915977	0.359679	NA	13.4466	3.59536	0	3.04458	11.5746	0.734355	0	10.3367	0	0	1.44682	0	82.4346	0.150522	2.83681	-2.68629	CEP76	chr18:12697453:-	chr18_12697456_-
chr14:90782945-90783162:mpeak_24799|chr14_90744805_90798481_NRDE2_NM_-mpeak_24799|chr14_90744805_90798481_NRDE2_NM_-||	6.66389	-3.86108	3.27572	-1.1787	NA	NA	0	31.4594	0	2.28344	3.61705	3.67178	0	38.2007	0	0	0	0.734355	82.3529	1.71656	5.70098	-3.98442	NRDE2	-	-
chr15:44852449-44852533:mpeak_26236|chr15_44829265_44853215_EIF3J_NM_+|	155.478	-0.743906	1.80421	-0.412316	0.680108	0.999521	46.2227	35.9536	451.569	140.051	127.32	128.512	33.6165	67.8624	546.9	65.4585	112.852	109.419	82.3199	0.431076	1.17212	-0.741048	EIF3J	-	chr15_44560300_+
chr13:20315703-20315796:mpeak_20833|chr13_20249793_20357159_PSPC1_NR_-mpeak_20833|chr13_20277500_20357159_PSPC1_NM_-||	207.002	2.64708	1.75474	1.50853	0.131419	0.876009	83.2008	16.1791	341.185	73.07	45.5749	53.6079	298.346	222.013	15.0523	512.251	463.706	359.834	82.2853	1.35483	-1.31897	2.6738	PSPC1	-	chr13_19741591_-;chr13_19741628_-
chr2:112995883-112995984:mpeak_43572|chr2_112974045_113012664_ZC3H8_NM_-|	16.1322	0.532148	1.65597	0.321351	0.747944	0.999521	11.7658	17.5274	5.01743	25.1178	18.8087	14.6871	11.7658	16.1791	0	14.4618	32.5535	25.7024	81.853	-0.772582	-1.37972	0.60714	ZC3H8	-	-
chr4:5759980-5760045:mpeak_57118|chr4_5712923_5812679_EVC_NM_+|	5.64058	0.673755	6.02742	0.111782	NA	NA	0	30.1111	0	0	0	0	0	36.8524	0	0	0.723411	0	81.7073	Inf	5.6708	Inf	EVC	chr4:5760038:+	chr4_5758310_+
chr3:119236053-119236169:mpeak_54254|chr3_119217367_119242452_TIMMDC1_NM_+|	210.38	-0.363985	1.92262	-0.189318	0.849844	0.999521	290.783	115.95	5.01743	350.888	279.237	194.604	375.664	123.59	5.01743	171.258	333.492	279.055	81.6524	-1.00215	-0.636292	-0.365857	TIMMDC1	chr3:119236163:+	chr3_119517282_+
chr8:70540009-70540107:mpeak_75183|chr8_70378858_70570739_SULF1_NM_+|	9.6123	1.42834	2.24271	0.636879	0.524204	NA	7.56371	0	5.01743	6.85031	4.34046	1.46871	17.6487	0.44942	5.01743	20.5509	36.894	9.54662	81.6409	-0.00895606	-1.53512	1.52616	SULF1	-	-
chr7:77365713-77365948:mpeak_71565|chr7_77325742_77407846_RSBN1L_NM_+|	6.5071	-2.09854	2.59662	-0.808183	0.418985	NA	0	6.7413	20.0697	2.28344	7.23411	4.40613	0	22.9204	10.0349	0	0.723411	3.67178	81.3558	0.945286	2.90651	-1.96123	RSBN1L	-	chr7_77736620_+
chr7:129837720-129837858:mpeak_72971|chr7_129806345_129845338_TMEM209_NM_-|	18.3451	-2.01378	1.86806	-1.078	0.281032	0.999521	26.0528	18.8756	0	22.8344	31.8301	37.4521	26.0528	29.2123	0	3.80573	13.7448	10.281	81.2962	-1.03583	0.989649	-2.02548	TMEM209	chr7:129837744:-;chr7:129837807:-	chr7_130197884_-;chr7_130197918_-;chr7_130197962_-
chr1:76205661-76205783:mpeak_3094|chr1_76190031_76228376_ACADM_NM_+|	64.8647	0.0954565	1.99653	0.0478113	0.961867	0.999521	70.5946	71.4578	0	101.994	40.511	57.2797	78.1583	96.6253	0	115.694	102.001	44.0613	81.2733	-0.492019	-0.582655	0.0906351	ACADM	-	chr1_75740032_+;chr1_75740097_+
chr15:65318987-65319146:mpeak_26975|chr15_65295594_65321977_MTFMT_NM_-|	13.862	0.319602	1.81334	0.176251	0.860097	0.999521	26.8932	3.14594	5.01743	13.7006	19.5321	16.1558	19.3295	9.43782	0	12.9395	13.0214	27.1711	81.2417	-0.494491	-0.885152	0.39066	MTFMT	chr15:65319086:-	chr15_65026750_-
chr6:52132657-52132778:mpeak_67037|chr6_52129584_52149679_MCM3_NM_-|	209.104	0.532783	1.71982	0.30979	0.756721	0.999521	153.795	221.564	396.377	126.35	87.5327	67.5607	480.716	465.15	5.01743	144.618	193.874	166.699	81.16	1.45526	0.91244	0.542822	MCM3	chr6:52132663:-	chr6_52267865_-
chr3:167728524-167728596:mpeak_55757|chr3_167728206_167813713_GOLIM4_NM_-|	12.8556	-1.25981	2.42207	-0.520136	0.602969	0.999521	15.9678	0	0	15.9841	15.1916	21.2963	9.24454	0	30.1046	14.4618	19.5321	12.484	81.1598	-1.71638	-0.240214	-1.47617	GOLIM4	-	chr3_168010748_-
chr12:125570806-125570967:mpeak_20651|chr12_125549924_125626637_AACS_NM_+|	107.18	0.131132	1.99372	0.0657725	0.947559	0.999521	189.093	41.3466	0	118.739	54.2558	35.9834	319.357	96.6253	10.0349	113.411	170.725	136.59	81.1374	0.141037	0.0180303	0.123006	AACS	-	-
chr7:69221181-69221262:mpeak_71271|chr7_69063904_70254733_AUTS2_NM_+|	68.2521	13.2899	6.00824	2.21194	NA	NA	0	0	235.819	0	0	0	0	0.44942	582.022	0	0	0.734355	80.972	Inf	9.63149	Inf	AUTS2	-	-
chr15:78828936-78829040:mpeak_27501|chr15_78799905_78829641_HYKK_NM_+|	3.44717	-1.2861	2.4019	-0.53545	0.592339	NA	0	2.2471	0	11.4172	2.17023	5.14049	4.20206	1.34826	0	6.85031	5.78729	2.20307	80.9719	-3.05905	-1.41891	-1.64014	HYKK	chr15:78828987:+;chr15:78829060:+	chr15_78536644_+;chr15_78536712_+
chr1:3745829-3745951:mpeak_234|chr1_3732081_3773797_CEP104_NM_-|	10.2503	0.681458	2.05398	0.331775	0.740059	NA	10.0849	17.078	0	13.7006	0.723411	6.6092	8.40412	25.1675	0	10.656	17.3619	13.2184	80.9103	0.368967	-0.296672	0.665639	CEP104	chr1:3745829:-	chr1_3829265_-
chr2:26022205-26022342:mpeak_40873|chr2_25967345_26101312_ASXL2_NM_-|	28.7955	1.63453	1.91903	0.851748	0.394354	0.999521	9.24454	20.2239	85.2963	14.4618	8.68093	13.2184	10.0849	84.4909	0	15.9841	39.0642	44.7957	80.8978	1.65821	-0.078202	1.73641	ASXL2	chr2:26022206:-	chr2_25799340_-;chr2_25799397_-
chrX:70618414-70618583:mpeak_81501|chrX_70586088_70749562_TAF1_NR_+mpeak_81501|chrX_70586088_70683673_TAF1_NM_+||	44.26	2.97858	2.15676	1.38104	0.167266	0.940872	5.04247	11.6849	190.662	4.56687	0	1.46871	10.0849	186.959	60.2092	14.4618	18.8087	27.1711	80.6171	5.10271	2.08957	3.01313	TAF1	-	chrX_71398574_+;chrX_71398615_+;chrX_71398668_+
chr6:90374099-90374345:mpeak_67873|chr6_90353912_90529513_MDN1_NM_-|	38.8816	0.977358	2.51282	0.388949	0.697314	0.999521	0	141.567	50.1743	6.08916	3.61705	0.734355	5.88289	232.8	0	5.32802	11.5746	8.81226	80.3334	4.19889	3.21442	0.984472	MDN1	chr6:90374101:-;chr6:90374206:-	-
chr16:75445733-75445858:mpeak_30750|chr16_75327940_75467387_CFDP1_NM_-|	99.5527	-0.943388	1.93404	-0.48778	0.625706	0.999521	131.104	22.0216	5.01743	152.99	182.3	174.777	179.848	12.1343	5.01743	60.1305	159.874	109.419	80.2758	-1.68945	-0.741747	-0.947706	CFDP1	-	chr16_75411943_-
chr13:30829578-30829698:mpeak_21161|chr13_30782875_30881624_KATNAL1_NM_-|	10.5699	0.979356	2.0965	0.467138	0.640401	NA	0.840412	4.4942	40.1394	3.04458	5.06388	6.6092	5.04247	32.8077	0	9.13375	10.8512	8.81226	80.0949	1.6275	0.394371	1.23312	KATNAL1	-	-
chr2:99790385-99790493:mpeak_43122|chr2_99785933_99797492_MITD1_NM_-|	14.3815	-0.466291	1.89397	-0.246197	0.805529	0.999521	16.8082	23.3698	0	9.89489	15.915	17.6245	21.8507	28.3135	0	6.85031	23.8726	8.07791	80.0932	-0.112431	0.370572	-0.483003	MITD1	-	chr2_99174002_-
chr11:17351672-17351896:mpeak_12848|chr11_17298285_17352958_NUCB2_NM_+|	39.6452	0.574409	1.7792	0.322846	0.746812	0.999521	28.574	18.8756	0	54.8025	44.1281	30.8429	32.7761	26.5158	0	60.1305	102.724	76.3729	80.0273	-1.45153	-2.01248	0.560953	NUCB2	chr11:17351900:+	chr11_17330175_+;chr11_17330213_+;chr11_17330273_+;chr11_17330348_+
chr3:12451866-12451925:mpeak_51722|chr3_12329348_12475396_PPARG_NM_+|	4.30139	-0.852693	2.37724	-0.35869	0.719827	NA	7.56371	4.94362	0	4.56687	5.78729	3.67178	14.287	1.34826	0	0	6.5107	2.93742	79.9943	-0.165323	0.726705	-0.892028	PPARG	chr3:12451924:+	chr3_12410424_+;chr3_12410473_+
chr1:118484360-118484467:mpeak_4589|chr1_118472371_118501914_WDR3_NM_+|	116.132	-1.14321	1.55943	-0.733095	0.4635	0.999521	69.7542	217.969	10.0349	149.185	165.661	150.543	66.3926	135.275	170.593	76.1146	100.554	81.5134	79.9864	-0.644296	0.527924	-1.17222	WDR3	-	-
chr6:71483027-71483139:mpeak_67299|chr6_71377473_71569902_SMAP1_NM_+|	116.652	1.03748	1.72214	0.602437	0.546883	0.999521	56.3076	30.1111	391.36	23.5955	44.8515	22.0307	51.2651	95.277	451.569	94.3821	78.1284	60.9515	79.8812	2.40071	1.35723	1.04348	SMAP1	chr6:71483128:+	-
chr5:70363308-70363525:mpeak_61772|chr5_70331623_70363497_GTF2H2_NM_-|	11.1331	-1.96143	2.13237	-0.919836	0.357659	NA	0	15.7297	0	14.4618	5.06388	11.7497	10.0849	44.0432	5.01743	12.1783	10.1278	5.14049	79.7847	-0.991534	1.10764	-2.09918	GTF2H2	-	chr5_71067683_-
chr10:15879190-15879247:mpeak_9157|chr10_15821140_15902519_FAM188A_NM_-|	12.9172	-0.271788	1.83661	-0.147984	0.882355	0.999521	13.4466	3.14594	0	19.0286	13.7448	24.9681	10.9254	9.88724	0	15.9841	12.298	31.5773	79.7235	-1.79907	-1.52412	-0.274956	FAM188A	-	-
chr10:75898087-75898147:mpeak_10494|chr10_75883668_75910826_AP3M1_NM_-|	13.9618	2.70386	2.23945	1.20738	0.227287	0.999521	0	4.04478	30.1046	3.04458	1.44682	0	24.372	35.0548	5.01743	9.89489	34.0003	20.5619	79.486	2.92662	-0.000291188	2.92691	AP3M1	-	-
chr17:27001984-27002153:mpeak_32582|chr17_26989301_27028456_SUPT6H_NM_+|	109.021	-0.195501	1.94329	-0.100603	0.919865	0.999521	115.977	113.254	0	105.038	61.4899	77.8417	152.115	276.393	5.01743	156.796	110.682	133.653	79.314	-0.0922649	0.112044	-0.204309	SUPT6H	-	chr17_28674970_+;chr17_28675032_+;chr17_28675084_+;chr17_28675144_+
chr8:23083792-23083842:mpeak_74160|chr8_23082733_23087460_LOC389641_NR_+|	4.05594	4.72855	2.98568	1.58374	0.113253	NA	0	6.7413	0	0	0	0	13.4466	3.59536	0	4.56687	15.915	4.40613	79.1141	Inf	-0.546362	Inf	LOC389641	-	-
chr1:16439-16501:mpeak_3|chr1_14829_29370_WASH7P_NR_-|	13.5299	-1.22815	1.92606	-0.637647	0.523703	0.999521	21.8507	10.7861	0	12.9395	26.0428	18.3589	5.88289	35.5042	0	9.89489	13.0214	8.07791	78.8575	-0.813071	0.417182	-1.23025	WASH7P	chr1:16442:-	chr1_16450_-
chr13:45589667-45589738:mpeak_21487|chr13_45563686_45601919_GPALPP1_NM_+|	6.62484	-1.63252	2.17099	-0.75197	0.452069	NA	0	6.7413	0	15.9841	9.40434	6.6092	5.88289	11.2355	0	8.3726	10.1278	5.14049	78.7609	-2.24687	-0.465735	-1.78113	GPALPP1	-	chr13_45015587_+
chr12:104325290-104325403:mpeak_19505|chr12_104324111_104341410_HSP90B1_NM_+|	1783.08	-1.27307	1.76858	-0.719827	0.471631	0.999521	1184.14	3029.99	55.1917	3316.31	2306.96	2051.05	796.711	820.191	3808.23	603.588	1969.12	1455.49	78.6953	-0.846033	0.429521	-1.27555	HSP90B1	chr12:104325396:+	-
chr1:112305355-112305572:mpeak_4155|chr1_112298189_112308358_DDX20_NM_+|	6.11728	0.501113	2.28533	0.219274	0.826437	NA	0	9.88724	0	3.04458	1.44682	4.40613	6.7233	18.4262	0	6.85031	9.40434	13.2184	78.6277	0.152162	-0.228866	0.381027	DDX20	-	chr1_111762868_+
chr12:76443324-76443545:mpeak_18919|chr12_76442244_76478813_NAP1L1_NM_-|	600.117	1.97825	1.78011	1.11131	0.266435	0.999521	265.57	66.5141	1068.71	158.318	288.641	217.369	1308.52	435.488	40.1394	852.483	1317.33	1182.31	78.5134	1.07628	-0.90984	1.98612	NAP1L1	chr12:76443346:-;chr12:76443388:-;chr12:76443414:-;chr12:76443480:-	chr12_76049567_-;chr12_76049638_-;chr12_76049721_-
chr1:62234983-62235105:mpeak_2828|chr1_62208148_62626579_INADL_NM_+|	5.39088	-0.587388	2.53316	-0.231879	0.816632	NA	8.40412	0	0	4.56687	6.5107	2.20307	21.0103	0.44942	0	9.89489	6.5107	5.14049	78.3246	-0.660155	-0.00579347	-0.654362	INADL	-	-
chr5:176409457-176409529:mpeak_64680|chr5_176332493_176433795_UIMC1_NM_-|	12.9102	-0.775132	2.25879	-0.343163	0.731476	0.999521	5.04247	8.08956	45.1569	6.85031	5.06388	0.734355	1.68082	7.64014	65.2266	0	7.23411	2.20307	78.1902	2.20425	2.98173	-0.777484	UIMC1	-	-
chr12:539856-539907:mpeak_16277|chr12_498515_550939_CCDC77_NM_+|	3.62049	-2.29261	3.11375	-0.736286	NA	NA	0	10.3367	0	1.52229	0	2.93742	0.840412	25.6169	0	0	0.723411	1.46871	78.1383	1.21275	3.59327	-2.38052	CCDC77	-	-
chr16:19726313-19726370:mpeak_29108|chr16_19718543_19729492_KNOP1_NM_-|	24.9899	-0.102751	1.76965	-0.0580629	0.953699	0.999521	31.0953	43.5937	5.01743	35.7738	20.2555	27.9055	14.287	53.9304	0	22.0732	20.9789	24.9681	77.8945	-0.074574	0.00417616	-0.0787502	KNOP1	-	-
chr11:117110506-117110579:mpeak_15652|chr11_117103340_117155801_RNF214_NM_+|	17.3859	-0.924718	2.03887	-0.453544	0.650157	0.999521	5.04247	20.6733	55.1917	6.85031	2.17023	5.14049	0.840412	32.8077	70.244	3.80573	0.723411	5.14049	77.8765	2.51435	3.42548	-0.911134	RNF214	-	chr11_117239840_+
chr8:17924575-17924766:mpeak_74062|chr8_17915132_17942507_ASAH1_NM_-|	47.7149	0.254502	1.97798	0.128668	0.897621	0.999521	75.6371	3.59536	0	54.0413	28.213	22.0307	100.009	47.6385	5.01743	78.398	89.7029	68.295	77.8493	-0.396368	-0.630836	0.234468	ASAH1	chr8:17924672:-	-
chr2:27592338-27592446:mpeak_41014|chr2_27587466_27593324_EIF2B4_NM_-|	47.6159	-0.180214	2.01384	-0.0894878	0.928694	0.999521	43.7014	100.221	0	35.7738	31.8301	46.2644	60.5097	124.489	0	27.4012	57.8729	43.327	77.7961	0.337922	0.524615	-0.186693	EIF2B4	-	-
chrX:53430487-53430601:mpeak_81152|chrX_53407107_53449677_SMC1A_NM_-|	132.019	1.06421	1.78271	0.596962	0.550533	0.999521	73.1159	106.063	316.098	74.5923	18.8087	27.9055	229.433	402.68	5.01743	132.439	110.682	87.3883	77.7356	2.02958	0.946897	1.08268	SMC1A	chrX:53430549:-	chrX_53403625_-
chr5:176863580-176863692:mpeak_64748|chr5_176853686_176868735_GRK6_NM_+|	52.6786	0.671869	1.70096	0.394995	0.692846	0.999521	23.5315	53.481	0	35.0127	43.4046	23.4994	96.6474	37.3019	15.0523	114.933	109.235	80.0447	77.5286	-0.404226	-1.02975	0.625527	GRK6	chr5:176863686:+	chr5_177436615_+;chr5_177436636_+;chr5_177436681_+
chr9:5092764-5092852:mpeak_77137|chr9_4985244_5126683_JAK2_NM_+|	25.2272	-2.66678	2.30604	-1.15643	0.247505	0.999521	32.7761	1.34826	0	88.2929	79.5752	55.0766	0	22.0216	0	7.61146	8.68093	7.34355	77.4793	-2.70781	-0.102064	-2.60575	JAK2	-	chr9_5092817_+
chr21:47706945-47707102:mpeak_49876|chr21_47706266_47717452_YBEY_NM_+|	6.88063	-1.30476	2.30598	-0.565815	0.57152	NA	19.3295	3.59536	0	1.52229	12.298	5.87484	0.840412	28.7629	0	3.04458	2.89364	4.40613	77.4402	0.219074	1.51691	-1.29784	YBEY	chr21:47707000:+;chr21:47707049:+;chr21:47707100:+	chr21_46287092_+;chr21_46287152_+;chr21_46287187_+
chr5:38886704-38886854:mpeak_61099|chr5_38845959_38932973_OSMR_NM_+|	19.2924	-1.74799	2.04454	-0.854954	0.392576	0.999521	28.574	27.4146	0	5.32802	33.2769	35.9834	31.0953	41.3466	0	2.28344	15.1916	11.0153	77.2877	-0.413816	1.34635	-1.76016	OSMR	chr5:38886759:+;chr5:38886841:+	chr5_38886654_+;chr5_38886738_+
chr17:34868904-34868988:mpeak_32947|chr17_34852250_34891305_MYO19_NM_-|	61.8764	-0.28004	1.97906	-0.141502	0.887474	0.999521	37.8186	80.8956	0	94.3821	67.2772	66.8263	110.934	42.6949	0	47.191	104.171	90.3257	77.2731	-0.944611	-0.653692	-0.29092	MYO19	chr17:34868903:-;chr17:34868929:-	chr17_36513089_-
chr7:111423999-111424200:mpeak_72603|chr7_111368776_111846462_DOCK4_NM_-|	61.7461	1.68869	3.26759	0.5168	0.605296	0.999521	0	0	150.523	0	0	0	3.36165	39.9984	541.882	2.28344	2.17023	0.734355	77.1593	Inf	6.81771	Inf	DOCK4	-	chr7_111783974_-
chr9:33988961-33989133:mpeak_77617|chr9_33922597_34048947_UBAP2_NM_-|	87.6645	-1.22792	2.04361	-0.600858	0.547934	0.999521	84.0412	144.713	0	73.07	60.0431	74.1699	41.1802	398.635	5.01743	64.6974	53.5324	52.8736	77.1372	0.142198	1.3784	-1.2362	UBAP2	-	chr9_33989042_-
chr17:59480128-59480291:mpeak_34520|chr17_59477256_59485414_TBX2_NM_+|	26.8955	1.87296	2.22497	0.841788	0.399907	0.999521	18.4891	0	0	3.04458	7.95752	5.14049	59.6693	2.2471	10.0349	56.3248	65.107	94.7318	77.09	0.195801	-1.58703	1.78283	TBX2	-	chr17_61402884_+
chr15:93555569-93555680:mpeak_27986|chr15_93443550_93567601_CHD2_NM_+|	123.095	-1.23695	2.66027	-0.46497	0.641953	0.999521	0	8.53898	481.673	3.04458	5.06388	8.81226	0.840412	31.9088	923.207	5.32802	5.78729	2.93742	76.9197	4.85654	6.08802	-1.23148	CHD2	-	chr15_93012399_+;chr15_93012436_+
chr22:16185995-16186055:mpeak_49938|chr22_16151821_16193009_DUXAP8_NR_-|	10.7054	2.91583	2.26711	1.28614	0.198393	NA	0	6.7413	0	1.52229	2.17023	0	4.20206	17.078	5.01743	48.7133	20.2555	22.765	76.9044	0.868419	-1.80253	2.67095	DUXAP8	-	-
chr12:58112818-58112973:mpeak_18449|chr12_58087737_58114566_OS9_NM_+|	115.256	-0.00294781	1.87756	-0.00157002	0.998747	0.999954	210.943	47.6385	0	99.7101	48.4685	62.4202	310.112	165.387	30.1046	114.933	171.448	121.903	76.7149	0.296125	0.308432	-0.0123069	OS9	-	chr12_57719151_+
chr8:95522637-95522689:mpeak_75647|chr8_95501088_95565746_KIAA1429_NM_-|	94.089	2.04932	1.85856	1.10264	0.270184	0.999521	21.0103	17.5274	401.394	9.13375	2.17023	6.6092	52.1056	165.387	356.238	28.9235	30.3833	38.1865	76.6793	4.61819	2.557	2.06119	KIAA1429	-	chr8_94510384_-
chr16:70790857-70790995:mpeak_30578|chr16_70721993_70835061_VAC14_NM_-|	3.90128	1.55301	2.68626	0.578132	0.563175	NA	0	8.08956	0	0	1.44682	0.734355	6.7233	14.3814	0	4.56687	9.40434	1.46871	76.6611	1.89095	0.450901	1.44005	VAC14	chr16:70790867:-;chr16:70790939:-	chr16_70756976_-;chr16_70757037_-
chr17:19769062-19769157:mpeak_32377|chr17_19679720_19771239_ULK2_NM_-|	169.111	3.50767	3.18537	1.10118	NA	NA	0	1.79768	852.963	1.52229	0	2.20307	6.7233	0	1108.85	16.7452	26.0428	12.484	76.6206	7.842	4.33509	3.5069	ULK2	-	-
chr4:89378640-89378692:mpeak_58689|chr4_89378267_89426823_HERC5_NM_+|	6.57759	-1.5864	2.89235	-0.548482	0.583361	NA	0	27.864	0	0.761146	3.61705	5.87484	0	36.403	0	0.761146	1.44682	2.20307	76.5432	1.44235	3.04487	-1.60252	HERC5	-	-
chr11:88070663-88070713:mpeak_15073|chr11_88027676_88070941_CTSC_NM_-|	4.33857	-0.50445	2.60313	-0.193786	0.846343	NA	5.04247	12.1343	0	0	6.5107	0	6.7233	15.7297	0	2.28344	2.17023	1.46871	76.5012	1.39958	1.92266	-0.523081	CTSC	-	-
chr6:139097198-139097421:mpeak_68800|chr6_139094656_139113885_CCDC28A_NM_+|	29.7321	-0.768838	1.63628	-0.469869	0.638449	0.999521	14.287	44.942	0	32.7293	25.3194	29.3742	37.8186	38.2007	40.1394	15.2229	36.894	41.8582	76.4846	-0.561707	0.305746	-0.867453	CCDC28A	chr6:139097464:+	chr6_138776272_+
chr8:131199476-131199540:mpeak_76603|chr8_131067051_131455906_ASAP1_NM_-|	79.9721	1.57598	1.68322	0.936288	0.349125	0.999521	7.56371	66.0647	240.837	12.1783	19.5321	15.4215	50.4247	140.668	220.767	56.3248	54.9792	74.9042	76.3524	2.73812	1.14524	1.59289	ASAP1	-	-
chr17:55339511-55339561:mpeak_34159|chr17_55333930_55756909_MSI2_NM_+|	15.136	0.02235	1.97665	0.011307	0.990979	0.999521	13.4466	1.79768	0	24.3567	18.8087	11.0153	0.840412	4.04478	25.0872	16.7452	39.7876	25.7024	76.2917	-1.82951	-1.45612	-0.373386	MSI2	-	-
chr1:151867305-151867550:mpeak_5373|chr1_151847404_151882361_THEM4_NM_-|	11.6103	-0.281083	1.76543	-0.159215	0.8735	NA	10.9254	4.94362	0	19.0286	14.4682	16.1558	10.9254	9.88724	0	12.9395	22.4257	17.6245	76.247	-1.64566	-1.34826	-0.297406	THEM4	chr1:151867306:-;chr1:151867424:-;chr1:151867511:-	chr1_151894902_-;chr1_151894939_-
chr2:159948264-159948317:mpeak_44586|chr2_159825145_160086088_TANC1_NM_+|	6.06643	-0.32843	2.13173	-0.154067	0.877557	NA	12.6062	4.4942	0	3.04458	3.61705	2.20307	1.68082	26.9652	5.01743	0.761146	5.06388	7.34355	76.1971	0.947885	1.35408	-0.406199	TANC1	chr2:159948315:+	chr2_159091803_+
chr10:27408218-27408334:mpeak_9390|chr10_27401049_27443349_YME1L1_NM_-|	239.036	4.00857	2.08121	1.92608	0.054095	0.648293	10.9254	4.4942	451.569	39.5796	20.9789	19.0932	481.556	116.4	15.0523	636.318	562.09	510.377	76.1798	2.55161	-1.47899	4.0306	YME1L1	-	-
chr8:1871625-1871693:mpeak_73825|chr8_1772141_1904914_ARHGEF10_NM_+|	13.0743	-2.2685	2.33545	-0.971332	0.331383	0.999521	0	30.1111	0	12.9395	9.40434	8.81226	16.8082	62.4694	0	7.61146	5.06388	3.67178	75.9638	-0.0492166	2.27788	-2.32709	ARHGEF10	-	-
chr2:114198919-114199009:mpeak_43666|chr2_114195267_114253213_CBWD2_NM_+|	14.215	2.31403	1.94215	1.19148	0.233467	0.999521	6.7233	0.44942	25.0872	6.08916	5.06388	5.87484	19.3295	8.9884	0	26.6401	32.5535	33.7803	75.947	0.921842	-1.71511	2.63695	CBWD2	-	-
chr14:60622705-60622870:mpeak_23825|chr14_60611731_60632211_DHRS7_NM_-|	72.1916	-0.110621	1.84686	-0.0598966	0.952238	0.999521	95.807	119.995	10.0349	120.261	63.6602	59.4828	138.668	59.7728	0	47.9522	88.9795	61.6858	75.8704	-0.108071	-0.00128383	-0.106787	DHRS7	-	-
chr5:43016110-43016227:mpeak_61189|chr5_43015252_43067541_LOC648987_NR_-|	7.81122	2.25232	1.91684	1.17502	0.239989	NA	0.840412	6.29188	10.0349	4.56687	1.44682	3.67178	9.24454	5.84246	0	19.7898	20.2555	11.7497	75.8585	0.825756	-1.77951	2.60526	LOC648987	chr5:43016150:-	chr5_43015991_-;chr5_43016037_-
chr10:90665317-90665448:mpeak_10799|chr10_90639943_90682924_STAMBPL1_NM_+|	5.93965	0.353069	2.02226	0.174591	0.861401	NA	10.0849	6.29188	0	3.04458	3.61705	5.87484	12.6062	8.9884	0	9.89489	9.40434	1.46871	75.8377	0.385524	0.056311	0.329213	STAMBPL1	chr10:90665434:+	chr10_88905671_+
chr18:45379620-45379821:mpeak_36562|chr18_45368321_45457517_SMAD2_NM_-|	103.614	-1.35361	1.67199	-0.809579	0.418182	0.999521	101.69	25.1675	0	156.796	133.108	205.619	74.7967	55.7281	120.418	98.1878	136.001	135.856	75.8284	-1.96574	-0.560339	-1.4054	SMAD2	-	chr18_47853303_-;chr18_47853349_-;chr18_47853392_-
chr9:116932215-116932315:mpeak_79161|chr9_116917824_117072828_COL27A1_NM_+|	4.92991	0.56503	6.03066	0.093693	NA	NA	0	25.1675	0	0	0	0	0	33.2571	0	0	0	0.734355	75.6757	Inf	5.50104	Inf	COL27A1	chr9:116932281:+;chr9:116932317:+	chr9_114169996_+;chr9_114170035_+
chr1:43166437-43166619:mpeak_2181|chr1_43148065_43167651_YBX1_NM_+|	471.254	-0.968481	1.54724	-0.625941	0.531353	0.999521	339.527	191.453	807.806	674.375	421.748	423.723	331.122	139.32	1299.51	216.165	417.408	392.88	75.6394	-0.183001	0.786046	-0.969047	YBX1	-	chr1_42700794_+;chr1_42700854_+;chr1_42700925_+;chr1_42700948_+;chr1_42700973_+
chr21:40186847-40186911:mpeak_49486|chr21_40177230_40194597_ETS2_NM_+|	38.4904	0.208131	2.04282	0.101884	0.918849	0.999521	3.36165	64.7165	100.349	15.2229	8.68093	3.67178	10.9254	206.733	5.01743	6.85031	23.8726	12.484	75.6376	2.61066	2.36561	0.245044	ETS2	chr21:40186905:+	chr21_38814977_+
chr11:118888648-118888799:mpeak_15812|chr11_118886468_118889057_RPS25_NM_-|	471.079	-2.84013	1.86354	-1.52405	0.127495	0.869603	1022.78	300.212	40.1394	964.371	573.665	561.047	99.1687	84.9404	1620.63	109.605	128.044	148.34	75.5308	-0.622833	2.22516	-2.84799	RPS25	chr11:118888668:-;chr11:118888711:-	chr11_119018033_-
chr7:134349826-134349891:mpeak_73097|chr7_134331530_134363604_BPGM_NM_+|	4.34806	3.2777	2.60238	1.2595	0.207849	NA	4.20206	9.43782	0	1.52229	0	0	5.04247	13.0332	0	1.52229	13.7448	3.67178	75.46	3.16351	-0.0673029	3.23082	BPGM	chr7:134349883:+	chr7_134665134_+
chr5:76351327-76351429:mpeak_61971|chr5_76326209_76358876_AGGF1_NM_+|	12.7289	2.48068	1.67209	1.48358	0.13792	0.897115	6.7233	2.69652	10.0349	3.80573	5.78729	1.46871	10.9254	9.88724	5.01743	38.0573	26.7662	31.5773	75.3181	0.814541	-1.9	2.71454	AGGF1	-	chr5_77055547_+
chr7:72891151-72891490:mpeak_71334|chr7_72856023_72936615_BAZ1B_NM_-|	195.058	-3.16538	1.79736	-1.76113	0.0782164	0.729961	92.4454	316.392	401.394	154.513	104.895	135.856	18.4891	79.9967	978.399	16.7452	18.8087	22.765	75.2385	1.03552	4.20676	-3.17123	BAZ1B	-	chr7_73476899_-;chr7_73477013_-;chr7_73477083_-
chr12:58111937-58112210:mpeak_18448|chr12_58087737_58114566_OS9_NM_+|	141.921	-0.409775	1.64646	-0.248882	0.803452	0.999521	273.974	81.345	25.0872	216.926	86.0859	105.747	310.112	165.387	30.1046	114.933	171.448	121.903	75.2382	-0.10371	0.308432	-0.412142	OS9	chr12:58112029:+	-
chr15:52646060-52646127:mpeak_26556|chr15_52606045_52821247_MYO5A_NM_-|	51.4743	2.51291	1.79611	1.39908	0.161789	0.933333	15.9678	3.59536	120.418	21.3121	5.06388	6.6092	62.1905	23.8193	100.349	77.6369	91.8732	88.857	75.1142	2.08535	-0.471342	2.55669	MYO5A	chr15:52646067:-	chr15_52353870_-
chr7:151058231-151058346:mpeak_73569|chr7_151038846_151074132_NUB1_NM_+|	34.9286	-0.328487	1.85392	-0.177186	0.859363	0.999521	25.2124	42.6949	0	30.4458	49.9153	46.9987	50.4247	39.9984	0	38.8184	54.9792	39.6552	75.0995	-0.907273	-0.561566	-0.345707	NUB1	chr7:151058287:+;chr7:151058335:+;chr7:151058365:+	chr7_151361246_+;chr7_151361278_+
chr12:56154328-56154398:mpeak_18180|chr12_56146624_56211540_SARNP_NR_-mpeak_18180|chr12_56151337_56211540_SARNP_NM_-||	174.471	2.47849	1.82068	1.3613	0.17342	0.946336	52.1056	28.3135	326.133	60.1305	39.7876	33.7803	316.835	219.766	5.01743	281.624	423.195	306.96	75.0623	1.60446	-0.901544	2.506	SARNP	-	chr12_55760485_-
chr11:64852419-64852480:mpeak_14062|chr11_64851693_64855399_ZFPL1_NM_+|	22.224	-0.972457	1.74113	-0.55852	0.576489	0.999521	28.574	5.84246	0	19.7898	36.894	25.7024	26.0528	37.7513	5.01743	22.0732	32.5535	26.4368	75.0125	-1.2593	-0.236193	-1.02311	ZFPL1	chr11:64852479:+	chr11_65085031_+
chr2:25798190-25798313:mpeak_40858|chr2_25600422_25896516_DTNB_NM_-|	7.88168	0.203995	1.74959	0.116596	0.90718	NA	6.7233	2.69652	0	4.56687	7.95752	9.54662	7.56371	6.29188	5.01743	12.1783	18.0853	13.9527	74.8673	-1.22838	-1.22825	-0.000126982	DTNB	chr2:25798193:-	chr2_25575327_-
chr12:79988116-79988220:mpeak_19006|chr12_79986473_80084790_PAWR_NM_-|	28.5386	0.0379123	1.97595	0.0191869	0.984692	0.999521	50.4247	5.84246	0	37.2961	23.1491	28.6399	29.4144	45.8408	0	19.7898	49.1919	52.8736	74.7685	-0.662891	-0.695305	0.032414	PAWR	-	chr12_79594369_-
chr4:151258684-151258799:mpeak_59758|chr4_151186964_151936649_LRBA_NM_-|	205.404	19.3818	3.19742	6.0617	NA	NA	0	0	466.621	0	0	0	71.435	105.164	1700.91	28.9235	48.4685	43.327	74.5596	Inf	3.95909	Inf	LRBA	-	-
chr15:61094913-61094980:mpeak_26797|chr15_60789818_61521502_RORA_NM_-|	80.2079	14.0915	5.97957	2.35661	NA	NA	0	0	260.906	0	0	0	0	2.69652	697.423	0	0	1.46871	74.532	Inf	8.89691	Inf	RORA	-	-
chr7:132720126-132720362:mpeak_73062|chr7_132470421_132766828_CHCHD3_NM_-|	36.0084	0.178956	1.58574	0.112854	0.910147	0.999521	36.9781	10.7861	60.2092	48.7133	8.68093	11.7497	68.0734	42.2455	35.122	24.3567	48.4685	36.7178	74.2387	0.643001	0.408936	0.234065	CHCHD3	chr7:132720106:-;chr7:132720142:-;chr7:132720245:-;chr7:132720290:-	-
chr7:138745081-138745296:mpeak_73213|chr7_138732599_138794465_ZC3HAV1_NM_-|	220.645	3.02665	2.06472	1.46588	0.14268	0.90488	35.2973	748.284	5.01743	22.0732	18.8087	25.7024	725.276	322.234	15.0523	275.535	201.108	253.353	74.2167	3.56604	0.541588	3.02445	ZC3HAV1	chr7:138745086:-	chr7_139060342_-;chr7_139060388_-
chr16:89864757-89864848:mpeak_31238|chr16_89805116_89883065_FANCA_NM_-|	35.4813	-1.8145	2.02815	-0.894658	0.37097	0.999521	31.9357	76.8508	0	22.0732	51.3622	49.9362	36.9781	109.658	0	9.13375	22.4257	15.4215	74.1878	-0.181511	1.6421	-1.82361	FANCA	chr16:89864762:-;chr16:89864793:-	chr16_89798356_-;chr16_89798402_-
chr7:87190569-87190713:mpeak_71779|chr7_87133765_87342639_ABCB1_NM_-|	973.667	0.389717	3.26438	0.119385	NA	NA	1.68082	6129.64	15.0523	1.52229	0.723411	2.20307	0	5522.92	5.01743	3.04458	0	2.20307	74.1249	10.4321	10.0409	0.391259	ABCB1	-	-
chr2:145273870-145273938:mpeak_44348|chr2_145271364_145277958_ZEB2_NR_-mpeak_44348|chr2_145147595_145277958_ZEB2_NM_-||	64.9834	-1.43613	6.00844	-0.239019	NA	NA	0	0	210.732	0	0	0	0	12.1343	556.935	0	0	0	74.062	Inf	Inf	NaN	ZEB2	-	-
chr7:100866001-100866060:mpeak_72259|chr7_100860984_100867217_ZNHIT1_NM_+|	72.9795	0.331349	2.14379	0.154562	0.877166	0.999521	142.87	19.7745	0	71.5477	43.4046	67.5607	190.774	29.6617	0	98.9489	115.746	95.4662	73.7834	-0.166277	-0.492661	0.326384	ZNHIT1	chr7:100866056:+	chr7_101222774_+
chr1:36754656-36755233:mpeak_1861|chr1_36690016_36769396_THRAP3_NM_+|	267.334	-0.367874	1.29828	-0.283355	0.776905	0.999521	305.07	221.115	406.412	175.825	164.938	152.746	350.452	246.282	667.318	122.544	179.406	215.9	73.7783	0.918178	1.28745	-0.369269	THRAP3	-	chr1_36289073_+;chr1_36289171_+;chr1_36289368_+;chr1_36289412_+;chr1_36289463_+;chr1_36289512_+
chr7:134347806-134347960:mpeak_73096|chr7_134331530_134363604_BPGM_NM_+|	4.56107	1.69899	2.27041	0.748318	0.454268	NA	2.52124	10.7861	0	0.761146	1.44682	2.20307	5.04247	13.0332	0	1.52229	13.7448	3.67178	73.6201	1.59303	-0.0673029	1.66033	BPGM	chr7:134347860:+	chr7_134663107_+
chr7:64259829-64259891:mpeak_71122|chr7_64254765_64312176_ZNF138_NR_+mpeak_71122|chr7_64254765_64291828_ZNF138_NM_+||	6.24276	0.0192166	2.21169	0.00868866	0.993068	NA	10.9254	7.64014	0	2.28344	2.17023	8.81226	24.372	0.89884	0	6.85031	3.61705	7.34355	73.4662	0.484898	0.504709	-0.0198114	ZNF138	chr7:64259883:+	chr7_64799526_+
chr1:109321968-109322040:mpeak_3918|chr1_109289284_109351404_STXBP3_NM_+|	8.48398	-0.0826233	1.92374	-0.0429493	0.965742	NA	3.36165	10.3367	0	11.4172	6.5107	13.2184	15.1274	3.59536	0	8.3726	15.915	13.9527	73.1638	-1.18506	-1.0303	-0.15476	STXBP3	-	chr1_108779408_+
chr2:54024871-54024938:mpeak_41723|chr2_54014067_54045034_ERLEC1_NM_+|	18.5762	0.366083	1.54719	0.236611	0.812958	0.999521	12.6062	6.29188	20.0697	14.4618	10.8512	18.3589	28.574	19.7745	5.01743	24.3567	39.7876	22.765	73.02	-0.16442	-0.703591	0.539171	ERLEC1	-	chr2_53797789_+
chr5:60186377-60186534:mpeak_61472|chr5_60170510_60240905_ERCC8_NM_-|	5.06323	-2.37955	2.59487	-0.917022	0.359131	NA	11.7658	4.94362	0	0	5.06388	11.7497	13.4466	9.43782	0	0	3.61705	0.734355	73.0165	-0.00896605	2.39481	-2.40378	ERCC8	chr5:60186378:-;chr5:60186420:-;chr5:60186483:-;chr5:60186509:-	chr5_60890525_-;chr5_60890595_-;chr5_60890657_-
chr13:42891777-42891832:mpeak_21437|chr13_42846288_42893223_AKAP11_NM_+|	11.264	1.22279	1.79288	0.682023	0.495224	NA	4.20206	9.43782	0	3.04458	10.1278	4.40613	5.04247	17.9768	5.01743	20.5509	29.6598	25.7024	72.9751	-0.365978	-1.43703	1.07106	AKAP11	-	-
chr9:75775707-75775802:mpeak_78085|chr9_75766646_75784966_ANXA1_NM_+|	12.1366	-0.308699	2.29527	-0.134494	0.893012	NA	10.9254	44.4926	0	3.80573	0.723411	2.20307	4.20206	71.9072	0	2.28344	2.89364	2.20307	72.8137	3.0412	3.36635	-0.325149	ANXA1	chr9:75775809:+	-
chr9:111752993-111753113:mpeak_78924|chr9_111705151_111775874_CTNNAL1_NM_-|	41.0591	-1.05263	2.00202	-0.525784	0.599038	0.999521	34.4569	91.6817	0	31.207	36.1705	49.2018	54.6268	118.647	0	21.3121	26.7662	28.6399	72.7973	0.113698	1.17541	-1.06172	CTNNAL1	-	chr9_108990731_-
chr1:220179460-220179661:mpeak_7670|chr1_220142298_220220000_EPRS_NM_-|	40.7293	2.03167	1.88193	1.07957	0.280333	0.999521	27.7336	14.8309	145.505	12.1783	5.06388	8.81226	78.1583	94.3782	0	22.8344	52.0856	27.1711	72.6686	2.85167	0.757045	2.09462	EPRS	-	chr1_220006149_-;chr1_220006298_-
chr16:27499538-27499662:mpeak_29325|chr16_27472883_27561251_GTF3C1_NM_-|	153.339	-0.559271	1.74884	-0.319796	0.749123	0.999521	166.402	310.999	75.2615	132.439	59.3197	80.0447	368.941	387.4	5.01743	55.5636	118.639	80.0447	72.5889	1.02383	1.58234	-0.55851	GTF3C1	-	-
chr7:105139452-105139521:mpeak_72431|chr7_105098373_105162685_PUS7_NM_-|	5.23891	1.0341	2.71928	0.380284	0.703734	NA	0	7.19072	0	1.52229	4.34046	0	18.4891	1.34826	0	1.52229	12.298	16.1558	72.4968	0.294557	-0.595594	0.890151	PUS7	-	chr7_105499005_-;chr7_105499031_-
chr11:18332309-18332485:mpeak_12894|chr11_18301489_18343721_HPS5_NM_-|	9.02053	1.81723	1.87412	0.969643	0.332225	NA	8.40412	17.078	15.0523	3.04458	2.89364	0.734355	11.7658	25.6169	0	9.13375	10.8512	3.67178	72.2872	2.60283	0.660123	1.94271	HPS5	-	chr11_18310888_-
chr3:183854672-183854771:mpeak_56172|chr3_183852809_183862671_EIF2B5_NM_+|	136.688	-0.410559	1.94228	-0.21138	0.832591	0.999521	87.4029	131.231	0	114.172	145.406	119.7	153.795	295.269	5.01743	170.497	248.13	169.636	72.2227	-0.794739	-0.373508	-0.42123	EIF2B5	chr3:183854768:+	chr3_184136906_+;chr3_184136995_+
chr12:20720723-20720777:mpeak_17001|chr12_20522178_20832963_PDE3A_NM_+|	43.9025	4.35175	6.00891	0.724216	NA	NA	0	0	220.767	0	0	0	0	0	306.063	0	0	0	72.1311	Inf	Inf	NaN	PDE3A	-	-
chr18:18588029-18588163:mpeak_36063|chr18_18531348_18691812_ROCK1_NM_-|	198.707	-0.516618	2.30361	-0.224265	NA	NA	9.24454	23.8193	893.103	39.5796	16.6384	31.5773	5.88289	35.0548	1244.32	16.7452	34.0003	34.5147	72.0606	3.39906	3.91404	-0.514988	ROCK1	-	chr18_21008093_-
chr12:49316337-49316472:mpeak_17670|chr12_49315984_49319330_FKBP11_NM_-|	88.6831	0.66684	2.12406	0.313947	0.753561	0.999521	51.2651	214.373	0	41.1019	51.3622	41.8582	173.965	195.048	0	97.4266	128.767	69.0294	71.9861	0.983765	0.321868	0.661897	FKBP11	chr12:49316343:-;chr12:49316400:-	chr12_48922563_-;chr12_48922618_-
chr19:5611124-5611295:mpeak_37390|chr19_5587410_5622938_SAFB2_NM_-|	29.9969	-1.28874	1.9534	-0.65974	0.509421	0.999521	44.5419	49.8856	0	27.4012	25.3194	33.046	50.4247	80.8956	0	10.656	26.0428	11.7497	71.9062	0.13879	1.43857	-1.29978	SAFB2	-	-
chr4:147108422-147108531:mpeak_59718|chr4_147096834_147110773_LSM6_NM_+|	39.151	0.90771	1.80255	0.50357	0.614564	0.999521	21.0103	20.6733	105.366	37.2961	15.1916	13.2184	74.7967	61.5705	0	25.879	43.4046	51.4049	71.8891	1.1622	0.176209	0.985994	LSM6	-	chr4_146187324_+;chr4_146187363_+
chr21:34954251-34954349:mpeak_49342|chr21_34950750_34961014_DONSON_NM_-|	48.4888	0.141069	1.77276	0.0795757	0.936575	0.999521	13.4466	101.569	10.0349	43.3853	32.5535	35.9834	20.1699	143.814	10.0349	44.1464	69.4474	57.2797	71.8601	0.160013	0.0263164	0.133697	DONSON	-	-
chr17:4542357-4542432:mpeak_31642|chr17_4535074_4544960_ALOX15_NM_-|	12.7142	0.0805362	2.50975	0.0320893	NA	NA	19.3295	0	0	6.85031	9.40434	4.40613	52.946	0.89884	0	9.89489	23.8726	24.9681	71.797	-0.0960919	-0.125426	0.0293342	ALOX15	-	-
chr8:124382121-124382273:mpeak_76394|chr8_124333415_124408705_ATAD2_NM_-|	97.2092	0.895676	1.67475	0.534811	0.592781	0.999521	42.0206	124.939	130.453	43.3853	32.5535	49.2018	151.274	258.416	5.01743	70.7865	99.1073	159.355	71.7161	1.24892	0.332918	0.915998	ATAD2	-	chr8_123369920_-;chr8_123370007_-
chr1:85130107-85130243:mpeak_3251|chr1_85113290_85156240_SSX2IP_NM_-|	24.3888	1.44824	1.60913	0.900013	0.368114	0.999521	12.6062	17.5274	5.01743	20.5509	14.4682	26.4368	13.4466	19.3251	0	52.519	56.426	54.3423	71.5069	-0.805987	-2.31689	1.51091	SSX2IP	-	chr1_84664508_-
chr11:134092971-134093053:mpeak_16222|chr11_134022947_134094426_NCAPD3_NM_-|	14.1164	-2.85931	2.05284	-1.39286	0.163663	0.933333	34.4569	7.64014	0	15.9841	28.9364	12.484	25.2124	33.7065	0	0.761146	4.34046	5.87484	71.4492	-0.447446	2.42432	-2.87176	NCAPD3	chr11:134092971:-;chr11:134092999:-	chr11_134223057_-;chr11_134223099_-
chr1:45452160-45452211:mpeak_2324|chr1_45316675_45452394_EIF2B3_NM_-|	28.1728	0.335912	1.94389	0.172804	0.862806	0.999521	34.4569	40.4478	0	33.4904	13.0214	11.0153	36.1377	68.7612	0	22.8344	44.1281	33.7803	71.4065	0.380814	0.0583243	0.322489	EIF2B3	-	-
chr16:88787568-88787675:mpeak_31103|chr16_88782262_88851372_PIEZO1_NM_-|	102.172	-0.585461	2.01572	-0.290448	0.771473	0.999521	145.391	51.2339	0	108.844	73.0645	74.9042	354.654	54.8292	5.01743	95.1432	140.342	122.637	71.155	-0.385267	0.210922	-0.59619	PIEZO1	chr16:88787574:-	-
chr7:157178862-157179024:mpeak_73742|chr7_157129709_157208709_DNAJB6_NM_+|	301.978	0.0694128	1.54512	0.044924	0.964168	0.999521	268.092	346.053	55.1917	213.882	314.684	281.258	209.263	656.153	80.2789	288.474	400.77	509.643	70.7772	-0.274876	-0.342249	0.0673726	DNAJB6	chr7:157178969:+;chr7:157179018:+	chr7_157386323_+
chr7:74945139-74945198:mpeak_71451|chr7_74703024_74988276_PMS2P5_NR_-|	3.94637	-1.6806	2.31818	-0.724966	0.468473	NA	0	1.34826	0	10.656	7.23411	8.07791	3.36165	0.44942	0	4.56687	5.78729	5.87484	70.7549	-4.26757	-2.09031	-2.17726	PMS2P5	-	-
chr8:102631869-102631935:mpeak_75918|chr8_102504667_102678816_GRHL2_NM_+|	25.5604	-0.487976	2.19827	-0.221981	0.824328	0.999521	17.6487	0	0	16.7452	14.4682	24.9681	57.9884	1.79768	15.0523	28.1624	54.2558	75.6386	70.7471	-1.67054	-1.07859	-0.591945	GRHL2	chr8:102631953:+	-
chr16:7383130-7383193:mpeak_28661|chr16_6069131_7760624_RBFOX1_NM_+|	70.6621	7.39318	6.00784	1.23059	NA	NA	0	0	351.22	0	0	0	0	0	496.726	0	0	0	70.7071	Inf	Inf	NaN	RBFOX1	-	-
chr20:33470743-33470811:mpeak_47720|chr20_33462765_33514889_ACSS2_NM_+|	5.47543	0.287016	2.15998	0.132879	0.894289	NA	1.68082	14.8309	0	5.32802	2.17023	2.20307	12.6062	10.7861	0	1.52229	7.23411	7.34355	70.5861	0.767234	0.538975	0.228259	ACSS2	chr20:33470799:+	chr20_34882957_+;chr20_34882989_+;chr20_34883048_+
chr18:12546843-12546906:mpeak_35967|chr18_12449895_12657912_SPIRE1_NM_-|	44.5485	1.60854	1.67516	0.960231	0.336939	0.999521	11.7658	7.64014	95.3312	24.3567	8.68093	12.484	62.1905	75.5025	25.0872	44.9076	101.278	65.3576	70.4859	1.33371	-0.378024	1.71173	SPIRE1	-	-
chr2:180830602-180830704:mpeak_45149|chr2_180810442_180871780_CWC22_NM_-|	10.1645	-0.0701221	2.16861	-0.032335	0.974205	NA	2.52124	22.9204	0	1.52229	10.1278	2.93742	5.04247	39.0995	10.0349	0.761146	10.8512	16.1558	70.4405	0.802463	0.964247	-0.161784	CWC22	-	-
chr1:209790744-209790804:mpeak_7416|chr1_209788752_209825820_LAMB3_NM_-|	52.8096	-0.0592225	2.44604	-0.0242116	0.980684	0.999521	5.04247	234.597	0	9.89489	1.44682	11.0153	49.5843	291.674	0	12.1783	5.06388	13.2184	70.2225	3.42207	3.48585	-0.0637805	LAMB3	-	-
chr16:71494747-71494809:mpeak_30593|chr16_71483788_71496155_ZNF23_NM_-|	2.83511	1.81623	3.12673	0.580872	0.561327	NA	0	6.7413	0	0	0.723411	0	1.68082	17.5274	0	0.761146	1.44682	5.14049	70.1919	3.22014	1.38621	1.83393	ZNF23	chr16:71494758:-	chr16_71460859_-
chr9:132593146-132593345:mpeak_79807|chr9_132590531_132597572_C9orf78_NM_-|	201.416	1.22388	1.69517	0.721977	0.470309	0.999521	149.593	46.7397	175.61	168.974	89.7029	87.3883	335.325	190.554	5.01743	341.754	424.642	401.692	70.0595	0.104037	-1.13765	1.24169	C9orf78	-	chr9_129830997_-
chr2:118575034-118575309:mpeak_43732|chr2_118572254_118588157_DDX18_NM_+|	238.018	-0.403003	1.94661	-0.207028	0.835988	0.999521	279.017	315.493	15.0523	294.563	340.726	333.397	239.518	340.66	0	216.926	251.747	229.119	70.0431	-0.668258	-0.266303	-0.401955	DDX18	-	chr2_117817473_+;chr2_117817510_+;chr2_117817671_+;chr2_117817727_+
chr7:5764948-5765079:mpeak_69872|chr7_5662810_5821361_RNF216_NM_-|	39.0261	1.86585	1.99055	0.93735	0.348578	0.999521	7.56371	29.6617	110.383	4.56687	9.40434	2.93742	7.56371	199.093	5.01743	23.5955	33.2769	35.2491	69.734	3.12595	1.20024	1.92571	RNF216	-	-
chr17:40963668-40963770:mpeak_33411|chr17_40962946_40976310_BECN1_NM_-|	147.406	2.91159	1.82972	1.59128	0.111547	0.830315	25.2124	13.932	285.994	50.9968	15.1916	14.6871	256.326	190.554	20.0697	261.834	318.301	315.773	69.6302	2.00728	-0.940083	2.94736	BECN1	-	-
chr1:173791723-173791943:mpeak_6328|chr1_173769657_173793777_CENPL_NM_-|	5.21835	-1.00196	2.64616	-0.378645	NA	NA	0	11.2355	0	3.04458	1.44682	3.67178	0.840412	31.4594	0	0.761146	7.95752	2.20307	69.5701	0.460861	1.56432	-1.10346	CENPL	-	-
chr8:68165732-68165899:mpeak_75161|chr8_68111333_68255912_ARFGEF1_NM_-|	75.0147	3.12344	2.7142	1.15078	0.249825	0.999521	0.840412	0.44942	351.22	1.52229	1.44682	0	3.36165	32.3582	471.638	4.56687	18.0853	14.6871	69.4795	6.89149	3.76424	3.12725	ARFGEF1	-	-
chr15:102261222-102261272:mpeak_28129|chr15_102194933_102264645_TARSL2_NM_-|	7.17707	3.48164	1.97332	1.76435	0.0776722	NA	5.88289	4.04478	0	1.52229	1.44682	0.734355	7.56371	6.7413	0	15.2229	23.8726	19.0932	69.3999	1.42258	-2.02422	3.4468	TARSL2	chr15:102261218:-	-
chr1:40034497-40034650:mpeak_2044|chr1_40026794_40042521_PABPC4_NM_-|	75.7624	0.094703	1.85442	0.0510688	0.959271	0.999521	66.3926	37.3019	0	82.2037	45.5749	49.9362	150.434	63.8176	10.0349	38.0573	214.853	150.543	69.3496	-0.777225	-0.84706	0.0698344	PABPC4	chr1:40034498:-	-
chr5:158492939-158492998:mpeak_64316|chr5_158126150_158526788_EBF1_NM_-|	79.6299	3.31418	6.00807	0.551621	NA	NA	0	0	245.854	0	0	0	0	2.2471	707.458	0	0	0	69.2835	Inf	Inf	NaN	EBF1	-	-
chr7:1166911-1167040:mpeak_69658|chr7_1037440_1177893_C7orf50_NM_-|	307.242	0.475569	1.76147	0.269984	0.787173	0.999521	210.103	313.246	10.0349	342.516	203.278	247.478	510.13	235.496	25.0872	544.219	609.112	436.207	69.2065	-0.572642	-1.04434	0.4717	C7orf50	-	chr7_1127354_-
chr8:73944276-73944373:mpeak_75219|chr8_73921096_73958195_TERF1_NM_+|	14.0151	0.866506	1.86057	0.465722	0.641415	0.999521	8.40412	16.1791	0	8.3726	9.40434	12.484	12.6062	22.9204	0	19.0286	46.2983	12.484	69.1967	-0.299784	-1.13107	0.83129	TERF1	-	chr8_73032136_+
chr1:52903888-52903965:mpeak_2604|chr1_52889674_53018762_ZCCHC11_NM_-|	247.422	5.4325	6.00658	0.904425	0.36577	0.999521	0	59.7728	1154.01	0	0	0	0	24.2687	1731.01	0	0	0	69.1502	Inf	Inf	NaN	ZCCHC11	-	chr1_52438225_-
chr10:1056404-1056466:mpeak_8747|chr10_1034348_1063014_GTPBP4_NM_+|	263.474	0.253737	1.92825	0.131589	0.895309	0.999521	170.604	376.614	0	116.455	159.15	123.372	400.036	741.992	45.1569	366.111	303.833	358.365	69.1405	0.455808	0.207271	0.248536	GTPBP4	chr10:1056460:+	chr10_1010520_+
chr11:66561731-66561781:mpeak_14310|chr11_66512206_66610639_C11orf80_NM_+|	9.05121	2.0486	2.21159	0.926301	0.354289	NA	0	7.64014	0	3.04458	2.17023	1.46871	5.04247	17.078	0	33.4904	15.915	22.765	69.0777	0.192989	-1.70603	1.89902	C11orf80	chr11:66561782:+	chr11_66794310_+
chr10:31749963-31750040:mpeak_9487|chr10_31608100_31815599_ZEB1_NM_+|	37.4625	-1.53975	6.01032	-0.256184	0.797809	0.999521	0	0	115.401	0	0	0	0	13.0332	321.116	0	0	0	69.0716	Inf	Inf	NaN	ZEB1	-	-
chr6:56974455-56974573:mpeak_67194|chr6_56954807_57033220_ZNF451_NM_+|	8.81264	0.124682	2.09045	0.0596436	0.952439	NA	17.6487	10.7861	0	5.32802	2.89364	5.87484	2.52124	38.6501	0	4.56687	9.40434	8.07791	69.0644	1.01232	0.90092	0.111397	ZNF451	chr6:56974514:+;chr6:56974574:+	chr6_57109730_+;chr6_57109793_+
chr6:43025635-43025823:mpeak_66830|chr6_43022224_43027283_MRPL2_NM_-|	13.5932	-2.35437	1.852	-1.27126	0.203636	0.975799	12.6062	8.9884	0	30.4458	26.0428	11.0153	5.04247	36.8524	5.01743	3.80573	13.0214	10.281	69.0477	-1.6443	0.791244	-2.43555	MRPL2	chr6:43025630:-;chr6:43025678:-	chr6_43057876_-;chr6_43057940_-;chr6_43058027_-
chr16:57207645-57207784:mpeak_30024|chr16_57188419_57219976_FAM192A_NM_-|	85.4561	-0.205876	1.87507	-0.109797	0.912571	0.999521	46.2227	83.1427	0	110.366	60.0431	44.7957	101.69	174.375	5.01743	130.156	135.278	134.387	69.036	-0.734259	-0.508361	-0.225898	FAM192A	-	-
chr6:91281358-91281545:mpeak_67915|chr6_91226400_91297020_MAP3K7_NM_-|	79.2286	0.997982	1.30159	0.766744	0.443234	0.999521	36.9781	53.9304	60.2092	63.1751	41.9578	42.5926	62.1905	91.6817	65.2266	95.9043	156.98	179.917	68.9724	0.0327535	-0.982124	1.01488	MAP3K7	-	-
chr6:160524785-160524856:mpeak_69435|chr6_160390130_160525705_IGF2R_NM_+|	130.268	-0.00842803	1.88219	-0.00447779	0.996427	0.999521	168.082	212.576	0	70.0254	15.915	26.4368	464.748	288.528	75.2615	47.9522	108.512	85.1852	68.9151	1.76015	1.77765	-0.0175071	IGF2R	-	chr6_160103811_+
chr9:75778407-75778453:mpeak_78086|chr9_75766646_75784966_ANXA1_NM_+|	11.5641	0.805321	2.54789	0.316073	0.751947	NA	3.36165	48.9868	0	0.761146	2.17023	0	4.20206	71.9072	0	2.28344	2.89364	2.20307	68.7806	4.1585	3.36635	0.792145	ANXA1	-	-
chr6:56976805-56976917:mpeak_67195|chr6_56954807_57033220_ZNF451_NM_+|	11.3812	-0.484883	2.00002	-0.242439	0.80844	NA	11.7658	25.6169	5.01743	5.32802	5.06388	20.5619	2.52124	38.6501	0	4.56687	9.40434	8.07791	68.6564	0.45395	0.90092	-0.446969	ZNF451	chr6:56976856:+;chr6:56976913:+	chr6_57112057_+;chr6_57112121_+
chr1:150198930-150199161:mpeak_5122|chr1_150193063_150208504_ANP32E_NM_-|	313.761	-0.0825263	1.42482	-0.0579206	0.953812	0.999521	80.6796	86.2886	265.924	401.124	336.386	387.74	386.59	139.77	105.366	337.949	684.347	552.97	68.5254	-1.37817	-1.31823	-0.0599405	ANP32E	chr1:150198943:-	chr1_150226691_-;chr1_150226742_-;chr1_150226778_-
chr16:90088508-90088620:mpeak_31269|chr16_90086036_90109603_GAS8_NM_+|	17.8432	-1.32116	1.87031	-0.706387	0.479948	0.999521	21.0103	3.14594	0	29.6847	37.6174	30.8429	22.6911	12.5838	0	11.4172	26.7662	18.3589	68.48	-2.02252	-0.680688	-1.34183	GAS8	chr16:90088570:+;chr16:90088598:+	chr16_90022189_+
chr4:140468067-140468192:mpeak_59564|chr4_140454520_140477923_SETD7_NR_-mpeak_59564|chr4_140417675_140477923_SETD7_NM_-||	6.42336	0.53062	2.61909	0.202597	0.83945	NA	3.36165	0	15.0523	12.1783	6.5107	0.734355	13.4466	0	0	6.08916	7.95752	11.7497	68.4706	-0.0769961	-0.939927	0.862931	SETD7	-	-
chr4:120138691-120138813:mpeak_59268|chr4_120133781_120213492_USP53_NM_+|	3.72942	0.895355	2.52003	0.355296	0.722368	NA	10.9254	1.34826	0	3.04458	3.61705	2.93742	0	8.9884	0	0.761146	5.78729	7.34355	68.2748	0.354596	-0.628117	0.982713	USP53	-	-
chr1:200821668-200821814:mpeak_6996|chr1_200708685_200826881_CAMSAP2_NM_+|	15.9645	-1.21639	1.86151	-0.653444	0.51347	0.999521	5.04247	18.8756	20.0697	8.3726	23.1491	39.6552	5.04247	38.2007	0	8.3726	11.5746	13.2184	67.8147	-0.694305	0.382786	-1.07709	CAMSAP2	-	chr1_200852556_+;chr1_200852592_+;chr1_200852647_+;chr1_200852679_+
chr6:149900027-149900116:mpeak_69017|chr6_149887527_149911862_GINM1_NM_+|	12.5169	-0.211409	1.90377	-0.111048	0.911579	NA	16.8082	10.3367	0	20.5509	5.78729	10.281	15.1274	25.1675	0	6.85031	23.8726	15.4215	67.3655	-0.431919	-0.195555	-0.236364	GINM1	-	-
chr15:66797677-66797741:mpeak_27064|chr15_66797420_66840688_ZWILCH_NM_+|	183.268	-0.319154	1.80127	-0.177182	0.859365	0.999521	74.7967	135.725	5.01743	356.977	198.938	205.619	222.709	92.5805	5.01743	261.073	361.705	279.055	67.2913	-1.82096	-1.4934	-0.327557	ZWILCH	-	chr15_66505390_+
chr3:153840729-153840944:mpeak_55472|chr3_153838791_153973119_ARHGEF26_NM_+|	10.824	-1.93143	1.82909	-1.05595	0.290993	NA	10.0849	12.5838	5.01743	12.9395	15.1916	16.8902	13.4466	7.64014	20.0697	0	8.68093	7.34355	67.2705	-0.701443	1.36084	-2.06228	ARHGEF26	chr3:153840864:+	-
chr8:48955575-48955748:mpeak_74797|chr8_48920994_48973241_UBE2V2_NM_+|	630.717	-0.751062	1.47219	-0.510168	0.609934	0.999521	377.345	174.824	757.632	1136.39	566.431	580.141	562.236	191.003	1199.17	677.42	635.155	710.856	67.0866	-0.801559	-0.0515506	-0.750008	UBE2V2	-	chr8_48043074_+
chr19:338300-338359:mpeak_37018|chr19_306711_344791_MIER2_NM_-|	3.49992	0.375531	3.08313	0.121802	0.903056	NA	3.36165	0	0	2.28344	10.8512	8.81226	0	0	5.01743	0	5.06388	6.6092	66.9994	-2.70677	-1.21816	-1.48861	MIER2	chr19:338307:-	chr19_338308_-
chr17:62230418-62230518:mpeak_34727|chr17_62226451_62340683_TEX2_NM_-|	26.0576	0.871227	1.72915	0.503846	0.61437	0.999521	10.9254	3.14594	70.244	15.2229	4.34046	6.6092	24.372	46.2903	55.1917	30.4458	23.8726	22.0307	66.9946	1.68774	0.721068	0.966671	TEX2	-	-
chr1:150667140-150667332:mpeak_5208|chr1_150621224_150669672_GOLPH3L_NM_-|	25.9951	-0.280779	1.54449	-0.181794	0.855744	0.999521	12.6062	16.6285	5.01743	32.7293	34.0003	35.2491	21.8507	24.2687	5.01743	19.7898	63.6602	41.1239	66.9814	-1.574	-1.28457	-0.289434	GOLPH3L	-	-
chr2:232326243-232326732:mpeak_46472|chr2_232319978_232329205_NCL_NM_-|	942.258	1.2475	1.90529	0.654757	0.512624	0.999521	410.121	379.31	1630.66	616.528	259.704	275.383	1924.54	1697.91	5.01743	1239.91	1530.01	1338	66.7158	1.07141	-0.179443	1.25085	NCL	chr2:232326251:-;chr2:232326314:-;chr2:232326350:-;chr2:232326409:-;chr2:232326454:-;chr2:232326562:-;chr2:232326650:-	chr2_231461829_-;chr2_231461850_-;chr2_231461971_-
chr13:99059692-99059747:mpeak_22188|chr13_98794815_99100489_FARP1_NM_+|	38.2575	4.63818	2.4709	1.87712	0.0605015	0.682923	0	3.59536	70.244	3.80573	2.89364	0	88.2433	22.471	0	98.1878	96.2136	73.4355	66.6936	3.46229	-1.27451	4.73681	FARP1	chr13:99059748:+	chr13_98407492_+
chr22:42097699-42097913:mpeak_51070|chr22_42095517_42195257_MEI1_NM_+|	4.11968	-0.575801	6.03554	-0.0954017	NA	NA	0	19.7745	0	0	0	0	0	29.6617	0	0	0	0	66.6667	Inf	Inf	NaN	MEI1	-	-
chr2:32264269-32264401:mpeak_41184|chr2_32249325_32264844_DPY30_NM_-|	172.974	-0.710674	1.51415	-0.469353	0.638817	0.999521	238.677	43.1443	160.558	241.283	119.363	146.137	167.242	75.5025	421.464	105.799	219.193	137.324	66.6024	-0.196084	0.522754	-0.718837	DPY30	-	-
chr16:70366969-70367070:mpeak_30517|chr16_70323669_70367423_DDX19B_NM_+|	86.2397	-0.00327227	1.31935	-0.0024802	0.998021	0.999521	62.1905	78.1991	65.2266	82.2037	58.5963	66.092	96.6474	162.241	50.1743	86.7706	122.256	104.278	66.529	-0.00892398	-0.0196723	0.0107483	DDX19B	-	-
chr1:17931324-17931377:mpeak_804|chr1_17866329_18023342_ARHGEF10L_NM_+|	3.79305	-1.63028	2.83613	-0.574826	0.565409	NA	9.24454	0	0	9.89489	2.17023	2.93742	0	13.932	0	0.761146	2.17023	4.40613	66.3546	-0.698535	0.925042	-1.62358	ARHGEF10L	chr1:17931376:+	chr1_17604879_+
chr3:124813818-124813971:mpeak_54526|chr3_124802896_124931609_SLC12A8_NM_-|	3.23824	3.3737	3.1527	1.0701	0.284575	NA	0	6.7413	0	0	0	0	4.20206	16.1791	0	3.04458	7.95752	0.734355	66.1522	Inf	0.796241	Inf	SLC12A8	-	-
chr6:126320535-126320723:mpeak_68503|chr6_126307575_126359850_TRMT11_NM_+|	13.6736	0.222127	1.68463	0.131855	0.895099	0.999521	5.04247	12.5838	15.0523	4.56687	13.7448	9.54662	7.56371	36.8524	5.01743	20.5509	14.4682	19.0932	66.1059	0.230236	-0.130468	0.360703	TRMT11	-	chr6_125999564_+
chr17:17124479-17124607:mpeak_32220|chr17_17117170_17140502_FLCN_NM_-|	35.7355	0.272432	2.2847	0.119242	0.905084	0.999521	10.9254	106.513	0	15.9841	8.68093	22.765	15.1274	162.69	0	5.32802	46.2983	34.5147	66.0441	1.30803	1.04562	0.262401	FLCN	chr17:17124485:-;chr17:17124555:-	chr17_17221172_-;chr17_17221242_-
chr2:69373436-69373545:mpeak_42183|chr2_69240275_69472356_ANTXR1_NM_+|	8.31085	-0.794109	2.48882	-0.319071	0.749673	NA	0	17.078	0	1.52229	7.95752	2.20307	5.88289	45.8408	0	8.3726	9.40434	1.46871	66.0353	0.54774	1.42629	-0.878553	ANTXR1	chr2:69373497:+;chr2:69373539:+;chr2:69373567:+	chr2_69146321_+;chr2_69146362_+;chr2_69146420_+;chr2_69146450_+
chr2:203162175-203162247:mpeak_45704|chr2_203130514_203168108_NOP58_NM_+|	57.9327	1.12257	1.75463	0.639772	0.522321	0.999521	10.9254	15.2803	80.2789	57.0859	51.3622	33.7803	55.4672	52.1327	0	82.2037	120.086	136.59	65.9756	-0.417566	-1.6551	1.23753	NOP58	chr2:203162243:+	chr2_202297513_+
chr19:3664306-3664358:mpeak_37273|chr19_3633167_3700490_PIP5K1C_NM_-|	4.15052	0.783803	2.97434	0.263522	0.792148	NA	0	8.08956	0	0	0	2.93742	2.52124	22.0216	0	8.3726	0.723411	5.14049	65.922	1.46151	0.785706	0.675805	PIP5K1C	chr19:3664307:-	chr19_3664309_-
chr18:31800256-31800314:mpeak_36341|chr18_31432999_31803515_NOL4_NM_-|	416.27	13.8677	5.70121	2.43241	NA	NA	0	0	898.12	0	0	0	1.68082	4.04478	4089.21	0	0.723411	1.46871	65.7974	Inf	10.8673	Inf	NOL4	-	-
chr1:35654777-35654957:mpeak_1760|chr1_35650194_35658743_SFPQ_NM_-|	1553.02	0.359964	1.84576	0.195022	0.845375	0.999521	384.909	443.128	5895.48	174.302	160.597	235.728	892.518	579.752	8755.42	250.417	462.26	401.692	65.7384	3.55859	3.19818	0.360414	SFPQ	chr1:35654849:-	chr1_35189262_-;chr1_35189306_-
chr6:57400394-57400453:mpeak_67220|chr6_57179602_57512796_PRIM2_NM_+|	5.45172	3.09909	2.78194	1.114	0.265277	NA	0	11.2355	0	0.761146	0	0	11.7658	22.471	0	6.08916	7.95752	5.14049	65.6341	3.88375	0.835405	3.04834	PRIM2	-	-
chr15:88610558-88610746:mpeak_27773|chr15_88420351_88799962_NTRK3_NM_-|	22.1603	-0.610919	6.0118	-0.10162	0.919058	0.999521	0	0	105.366	0	0	0	0	0	160.558	0	0	0	65.625	Inf	Inf	NaN	NTRK3	-	-
chr11:73950171-73950280:mpeak_14702|chr11_73882107_73964536_PPME1_NM_+|	541.451	-1.51366	1.64293	-0.921321	0.356883	0.999521	222.709	1294.78	712.475	175.063	217.023	173.308	111.775	689.86	2599.03	97.4266	109.235	94.7318	65.5744	1.97969	3.4961	-1.51641	PPME1	-	chr11_74239184_+;chr11_74239225_+
chr16:30723148-30723287:mpeak_29580|chr16_30710461_30748369_SRCAP_NM_+|	4.88382	-1.86077	2.8155	-0.6609	NA	NA	0	16.1791	0	3.04458	2.17023	7.34355	0	24.7181	0	1.52229	2.89364	0.734355	65.4545	0.365484	2.26284	-1.89736	SRCAP	-	chr16_30711876_+;chr16_30711963_+
chr5:141314901-141315113:mpeak_63838|chr5_141303384_141318085_KIAA0141_NM_+|	42.702	-0.80559	2.06993	-0.389188	0.697137	0.999521	81.52	11.2355	0	28.1624	67.2772	52.8736	26.0528	115.95	0	40.3407	38.3408	50.6705	65.3193	-0.677142	0.13462	-0.811762	KIAA0141	chr5:141314910:+;chr5:141315000:+;chr5:141315048:+;chr5:141315113:+	chr5_141935433_+;chr5_141935481_+;chr5_141935546_+
chr17:74222417-74222504:mpeak_35177|chr17_74141434_74236390_RNF157_NM_-|	38.7189	4.49388	3.05033	1.47324	0.140686	0.904362	0	0	75.2615	0	0	0	6.7233	27.864	311.081	16.7452	14.4682	12.484	65.3183	Inf	2.98377	Inf	RNF157	-	-
chr5:122364992-122365089:mpeak_62929|chr5_122359698_122372425_PPIC_NM_-|	174.013	-0.277565	1.88142	-0.14753	0.882714	0.999521	262.209	41.7961	10.0349	312.831	133.831	125.575	389.951	80.8956	10.0349	235.194	264.768	221.041	65.3049	-0.865666	-0.584324	-0.281342	PPIC	chr5:122365000:-	chr5_123029309_-;chr5_123029334_-
chr1:109492430-109492537:mpeak_3948|chr1_109475123_109506121_CLCC1_NM_-|	85.2059	0.128879	1.94383	0.0663014	0.947138	0.999521	162.2	32.3582	5.01743	117.978	99.1073	74.9042	154.636	49.4362	0	109.605	106.341	110.888	65.1976	-0.548982	-0.679479	0.130498	CLCC1	-	chr1_108949823_-;chr1_108949857_-
chr2:111397363-111397428:mpeak_43513|chr2_111395736_111435684_BUB1_NM_-|	26.9566	-0.00840219	1.93825	-0.00433493	0.996541	0.999521	24.372	90.3334	10.0349	6.08916	18.8087	10.281	20.1699	107.411	0	6.08916	14.4682	15.4215	65.1821	1.82615	1.8262	-4.80008e-05	BUB1	-	-
chr2:212906508-212906682:mpeak_45975|chr2_212248785_213403352_ERBB4_NM_-|	78.4008	17.6979	5.90151	2.99887	NA	NA	0	0	366.272	0	0	0	0	0	561.952	3.80573	2.17023	6.6092	65.1786	Inf	5.48065	Inf	ERBB4	-	-
chr5:172573861-172573924:mpeak_64569|chr5_172571444_172590727_BNIP1_NM_+|	29.0691	0.364487	1.72036	0.211867	0.832211	0.999521	26.8932	9.43782	0	28.1624	11.5746	19.8276	45.3823	33.2571	5.01743	39.5796	67.2772	62.4202	65.143	-0.713252	-1.01683	0.303579	BNIP1	-	-
chr22:24133969-24134157:mpeak_50274|chr22_24129149_24176327_SMARCB1_NM_+|	110.926	1.88547	1.80254	1.04601	0.295558	0.999521	47.0631	39.549	230.802	40.3407	28.213	8.81226	181.529	301.111	5.01743	119.5	182.3	146.871	65.0895	2.03659	0.120213	1.91638	SMARCB1	-	chr22_23791832_+
chr2:66670030-66670307:mpeak_42129|chr2_66662531_66798377_MEIS1_NM_+|	328.807	14.5328	5.54616	2.62033	NA	NA	0	0	702.44	0	0	0	2.52124	5.84246	3231.23	0	1.44682	2.20307	65.049	Inf	9.79374	Inf	MEIS1	-	-
chr9:136905290-136905395:mpeak_80044|chr9_136898827_136933141_BRD3_NM_-|	420.488	2.63624	1.84548	1.42848	0.153153	0.916228	21.0103	45.8408	1264.39	45.6687	56.426	54.3423	291.623	722.218	1038.61	554.875	446.344	504.502	64.8612	3.08912	0.446891	2.64223	BRD3	-	chr9_134040158_-;chr9_134040210_-
chr4:75314767-75314971:mpeak_58277|chr4_75310814_75320475_AREG_NM_+|	95.4288	0.581985	2.02588	0.287275	0.773902	0.999521	109.254	8.08956	5.01743	78.398	80.2986	93.9975	179.008	4.94362	5.01743	147.662	181.576	251.884	64.7517	-1.04625	-1.62069	0.57444	AREG	-	chr4_74449049_+;chr4_74449187_+;chr4_74449246_+
chr14:96924414-96924486:mpeak_25017|chr14_96858447_96954641_AK7_NM_+|	11.3286	1.24637	2.32557	0.535939	0.592	NA	5.04247	0	0	5.32802	2.89364	6.6092	15.1274	0.44942	0	33.4904	36.894	30.1086	64.7432	-1.5564	-2.68962	1.13322	AK7	-	chr14_96458119_+
chr8:92083356-92083511:mpeak_75579|chr8_92082423_92097011_OTUD6B_NM_+|	23.7803	-1.40208	1.69806	-0.825694	0.408978	0.999521	26.0528	6.7413	5.01743	54.0413	51.3622	43.327	27.7336	11.2355	0	18.2675	18.0853	23.4994	64.6863	-1.9758	-0.619072	-1.35673	OTUD6B	-	chr8_91071178_+
chr1:155804061-155804172:mpeak_5678|chr1_155720524_155829191_GON4L_NM_-|	2.82994	3.43451	2.67955	1.28175	0.199931	NA	5.04247	4.04478	5.01743	0	0	0	2.52124	12.1343	0	2.28344	1.44682	1.46871	64.1607	Inf	1.49515	Inf	GON4L	-	-
chr4:160250998-160251058:mpeak_59941|chr4_160188997_160279265_RAPGEF2_NM_+|	77.4055	-1.45797	2.62012	-0.556453	NA	NA	2.52124	6.7413	341.185	0.761146	11.5746	8.07791	4.20206	10.3367	531.848	0	8.68093	2.93742	64.1392	4.1016	5.55544	-1.45385	RAPGEF2	-	chr4_159329917_+
chr7:26236175-26236288:mpeak_70356|chr7_26231958_26240413_HNRNPA2B1_NM_-mpeak_70356|chr7_26231958_26240413_HNRNPA2B1_NM_-||	476.649	-0.525719	1.47434	-0.35658	0.721406	0.999521	495.003	180.217	265.924	697.971	492.643	398.021	840.412	97.0747	531.848	388.184	654.687	677.81	64.0524	-0.755299	-0.227817	-0.527483	HNRNPA2B1	chr7:26236202:-	chr7_26196638_-
chr5:58445155-58445302:mpeak_61441|chr5_58270907_59783925_PDE4D_NM_-|	39.735	-0.688326	6.01024	-0.114526	0.908821	0.999521	0	0	115.401	0	0	0	0	9.43782	351.22	0.761146	0	0	63.9947	Inf	8.88824	Inf	PDE4D	-	-
chr8:95541291-95541585:mpeak_75650|chr8_95501088_95565746_KIAA1429_NM_-|	97.9768	-1.1266	1.55959	-0.722369	0.470067	0.999521	36.9781	254.372	75.2615	57.0859	47.0217	33.7803	52.1056	165.387	356.238	28.9235	30.3833	38.1865	63.8997	1.41075	2.557	-1.14624	KIAA1429	-	chr8_94529079_-;chr8_94529107_-;chr8_94529180_-;chr8_94529231_-
chr14:58988587-58988646:mpeak_23786|chr14_58894102_59014498_KIAA0586_NM_+|	4.18486	3.56733	2.56304	1.39184	0.163971	NA	3.36165	8.53898	0	0	0	0	5.88289	17.078	5.01743	2.28344	1.44682	6.6092	63.8029	Inf	1.43615	Inf	KIAA0586	-	-
chr22:18095987-18096092:mpeak_49976|chr22_18075502_18111588_ATP6V1E1_NM_-|	290.118	1.89677	1.82909	1.037	0.299734	0.999521	147.072	26.0664	416.447	101.232	79.5752	104.278	712.67	201.79	10.0349	460.493	644.559	577.203	63.7738	1.0483	-0.863661	1.91196	ATP6V1E1	-	chr22_17613317_-
chr14:78189520-78189625:mpeak_24625|chr14_78184629_78227497_SNW1_NM_-|	36.6321	5.29922	2.73476	1.93773	0.0526567	0.643403	0	2.69652	130.453	0.761146	0	0.734355	34.4569	174.824	0	19.7898	33.2769	42.5926	63.6224	6.47628	1.12947	5.34681	SNW1	chr14:78189557:-	chr14_77723237_-
chr2:192900423-192900486:mpeak_45424|chr2_192815190_193059659_TMEFF2_NM_-|	58.1186	5.2165	6.00827	0.86822	NA	NA	0	0	270.941	0	0	0	0	0	426.482	0	0	0	63.5294	Inf	Inf	NaN	TMEFF2	-	-
chr19:17216688-17216751:mpeak_38177|chr19_17186590_17322703_MYO9B_NM_+|	11.0505	-1.05068	2.39054	-0.439517	0.660287	NA	0	22.9204	0	2.28344	9.40434	3.67178	9.24454	62.9188	0	6.85031	7.23411	8.07791	63.5237	0.577497	1.70316	-1.12566	MYO9B	chr19:17216742:+	chr19_17105931_+
chr7:56126037-56126209:mpeak_71043|chr7_56119377_56130705_CCT6A_NM_+|	867.073	0.622154	1.76072	0.353352	0.723825	0.999521	876.55	377.063	662.301	491.7	513.622	591.89	1623.68	1382.42	10.0349	1309.17	1367.25	1199.2	63.5223	0.262477	-0.36173	0.624207	CCT6A	-	chr7_56058394_+;chr7_56058441_+;chr7_56058473_+;chr7_56058516_+
chr12:111012598-111012650:mpeak_19853|chr12_110974900_111021064_PPTC7_NM_-|	3.98586	-1.41232	2.42309	-0.582862	0.559986	NA	5.04247	0	0	7.61146	2.89364	2.20307	4.20206	11.6849	0	8.3726	3.61705	2.20307	63.4793	-1.33355	0.162694	-1.49625	PPTC7	-	-
chr17:48183565-48183826:mpeak_33965|chr17_48172100_48187320_PDK2_NM_+|	14.8701	-1.06766	1.80663	-0.590966	0.554543	0.999521	5.88289	17.078	0	10.656	21.7023	16.8902	8.40412	40.8972	5.01743	22.8344	19.5321	9.54662	63.4058	-1.10091	0.0653526	-1.16626	PDK2	chr17:48183620:+;chr17:48183735:+;chr17:48183832:+	chr17_50106255_+;chr17_50106329_+;chr17_50106369_+;chr17_50106478_+
chr2:63194612-63194669:mpeak_42008|chr2_62900985_63272544_EHBP1_NM_+|	261.966	18.2723	3.52289	5.18673	NA	NA	0	0	536.865	0	0	0	1.68082	13.0332	2528.78	9.89489	18.0853	35.2491	63.322	Inf	5.33008	Inf	EHBP1	-	-
[truncated: 4,986 more rows]
