# Supplementary material for: Compartment-specific and ELAVL1-coordinated regulation of intronic polyadenylation isoforms by doxorubicin
Source: HighWire-hosted journal article supplement (doi:10.1101/gr.276192.121), 2022-07-01
Supplement: Supplemental_Table_S14.xlsx.xlsx [file Supplemental_Table_S14.xlsx.xlsx]

## Sheet: Feuil1
Supplemental Table S14 : List of 344 IPA isoforms from Fig. 3D.
IPA peak	strand	gene	list	chromosome	start	end	IPA peak		strand	refSeq CDS
chr10:102673590-102673650:mpeak_162|chr10_102672325_102721633_FAM178A_NM_+	+	FAM178A	HP-Cyto_6h_Positive_IPA25pc_noCutoffOfP	chr10	102673591	102673647	chr10:102673591-102673647:mpeak_11241|chr10_102672325_102721633_FAM178A_NM_+|	23.28	+	uc001krr.1:102672867:102686011:+;uc001krs.3:102672867:102719328:+;uc001krt.4:102672867:102721669:+
chr10:134166849-134166902:mpeak_174|chr10_134150610_134180349_LRRC27_NR_+	+	LRRC27	HP-Cyto_UT_Positive_IPA25pc_noCutoffOfP	chr10	134166849	134166902	chr10:134166849-134166902:mpeak_13271|chr10_134150610_134180349_LRRC27_NR_+mpeak_13271|chr10_134145613_134188569_LRRC27_NM_+||	4.37	+	uc010quw.1:134147028:134188746:+;uc001lli.2:134147028:134188746:+;uc001llj.2:134150308:134188746:+;uc001llk.4:134155756:134180421:+
chr10:32103220-32103293:mpeak_128|chr10_32096760_32217804_ARHGAP12_NM_-	-	ARHGAP12	HP-Cyto_18h_Positive_IPA25pc_noCutoffOfP	chr10	32103220	32103293	chr10:32103220-32103293:mpeak_9497|chr10_32096760_32217804_ARHGAP12_NM_-|	7.85	-	uc001ivy.2:32096585:32197783:-;uc001ivz.2:32096585:32197783:-;uc001iwb.2:32096585:32197783:-;uc009xls.3:32096585:32197783:-;uc001iwc.2:32096585:32197783:-;uc009xlq.2:32096585:32197783:-;uc009xlr.2:32103187:32197777:-
chr10:34601184-34601249:mpeak_132|chr10_34400490_35104253_PARD3_NM_-	-	PARD3	HP-Cyto_UT_Positive_IPA25pc_noCutoffOfP	chr10	34601184	34601246	chr10:34601184-34601246:mpeak_10252|chr10_34400490_35104253_PARD3_NM_-|	53.88	-	uc010qej.2:34400096:35103923:-;uc010qek.2:34400096:35103923:-;uc010qel.2:34400096:35103923:-;uc010qem.2:34400096:35103923:-;uc010qen.2:34400096:35103923:-;uc010qeo.2:34400096:35103923:-;uc010qep.2:34400096:35103923:-;uc010qeq.2:34400096:35103923:-
chr10:43103533-43103592:mpeak_139|chr10_43090147_43134285_ZNF33B_NM_-	-	ZNF33B	HP-Cyto_6h_Positive_IPA25pc_noCutoffOfP	chr10	43103538	43103592	chr10:43103538-43103592:mpeak_9501|chr10_43070126_43134285_ZNF33B_NR_-mpeak_9501|chr10_43090147_43134285_ZNF33B_NM_-||	10.9	-	uc009xmg.1:43078563:43132376:-;uc001jaf.1:43088060:43132376:-
chr10:43103533-43103592:mpeak_139|chr10_43090147_43134285_ZNF33B_NM_-	-	ZNF33B	HP-Cyto_UT_Positive_IPA25pc_noCutoffOfP	chr10	43103538	43103592	chr10:43103538-43103592:mpeak_10375|chr10_43070126_43134285_ZNF33B_NR_-mpeak_10375|chr10_43090147_43134285_ZNF33B_NM_-||	20.75	-	uc009xmg.1:43078563:43132376:-;uc001jaf.1:43088060:43132376:-
chr10:70392323-70392452:mpeak_147|chr10_70320116_70450564_TET1_NM_+	+	TET1	HP-Cyto_18h_Positive_IPA25pc_noCutoffOfP	chr10	70392322	70392456	chr10:70392322-70392456:mpeak_10172|chr10_70320116_70450564_TET1_NM_+|	4.89	+	uc001jok.4:70332095:70451571:+
chr10:86152178-86152251:mpeak_152|chr10_86088344_86273204_CCSER2_NM_+	+	CCSER2	HP-Cyto_6h_Positive_IPA25pc_noCutoffOfP	chr10	86152164	86152253	chr10:86152164-86152253:mpeak_10568|chr10_86088344_86273204_CCSER2_NM_+|	33.91	+	uc001kdh.1:86130808:86273299:+;uc010qmd.1:86130808:86274023:+
chr10:86152178-86152251:mpeak_152|chr10_86088344_86273204_CCSER2_NM_+	+	CCSER2	HP-Cyto_UT_Positive_IPA25pc_noCutoffOfP	chr10	86152186	86152250	chr10:86152186-86152250:mpeak_11505|chr10_86088344_86273204_CCSER2_NM_+|	28.44	+	uc001kdh.1:86130808:86273299:+;uc010qmd.1:86130808:86274023:+
chr10:93711151-93711207:mpeak_157|chr10_93683735_93788546_BTAF1_NM_+	+	BTAF1	HP-Cyto_18h_Positive_IPA25pc_noCutoffOfP	chr10	93711146	93711314	chr10:93711146-93711314:mpeak_10894|chr10_93683735_93788546_BTAF1_NM_+|	11.92	+	uc001khr.3:93683833:93788690:+
chr11:10789346-10789533:mpeak_182|chr11_10772533_10800225_CTR9_NM_+	+	CTR9	HP-Cyto_18h_Positive_IPA25pc_noCutoffOfP	chr11	10789346	10789533	chr11:10789346-10789533:mpeak_12649|chr11_10772533_10800225_CTR9_NM_+|	16.52	+	uc001mja.3:10772959:10800652:+
chr11:117117511-117117728:mpeak_230|chr11_117103340_117155801_RNF214_NM_+	+	RNF214	HP-Cyto_18h_Positive_IPA25pc_noCutoffOfP	chr11	117117513	117117646	chr11:117117513-117117646:mpeak_15654|chr11_117103340_117155801_RNF214_NM_+|	31.13	+	uc001pqt.4:117104988:117155867:+;uc010rxf.2:117104988:117155867:+;uc001pqu.3:117104988:117155867:+
chr11:117117511-117117728:mpeak_230|chr11_117103340_117155801_RNF214_NM_+	+	RNF214	HP-Cyto_UT_Positive_IPA25pc_noCutoffOfP	chr11	117117513	117117728	chr11:117117513-117117728:mpeak_16964|chr11_117103340_117155801_RNF214_NM_+|	24.34	+	uc001pqt.4:117104988:117155867:+;uc010rxf.2:117104988:117155867:+;uc001pqu.3:117104988:117155867:+
chr11:117150616-117150675:mpeak_231|chr11_117103340_117155801_RNF214_NM_+	+	RNF214	HP-Cyto_18h_Positive_IPA25pc_noCutoffOfP	chr11	117150619	117150691	chr11:117150619-117150691:mpeak_15657|chr11_117103340_117155801_RNF214_NM_+|	17.61	+	uc001pqt.4:117104988:117155867:+;uc010rxf.2:117104988:117155867:+;uc001pqu.3:117104988:117155867:+
chr11:117150616-117150675:mpeak_231|chr11_117103340_117155801_RNF214_NM_+	+	RNF214	HP-Cyto_UT_Positive_IPA25pc_noCutoffOfP	chr11	117150619	117150675	chr11:117150619-117150675:mpeak_16968|chr11_117103340_117155801_RNF214_NM_+|	17.29	+	uc001pqt.4:117104988:117155867:+;uc010rxf.2:117104988:117155867:+;uc001pqu.3:117104988:117155867:+
chr11:117150875-117150941:mpeak_232|chr11_117103340_117155801_RNF214_NM_+	+	RNF214	HP-Cyto_UT_Positive_IPA25pc_noCutoffOfP	chr11	117150875	117150941	chr11:117150875-117150941:mpeak_16969|chr11_117103340_117155801_RNF214_NM_+|	20.38	+	uc001pqt.4:117104988:117155867:+;uc010rxf.2:117104988:117155867:+;uc001pqu.3:117104988:117155867:+
chr1:113617479-113617529:mpeak_54|chr1_113615791_113666496_LRIG2_NM_+	+	LRIG2	HP-Cyto_6h_Positive_IPA25pc_noCutoffOfP	chr1	113617480	113617529	chr1:113617480-113617529:mpeak_3965|chr1_113615791_113666496_LRIG2_NM_+|	7.45	+	uc001edf.1:113616028:113666723:+
chr1:113992583-113992916:mpeak_55|chr1_113933474_114224833_MAGI3_NM_+	+	MAGI3	HP-Cyto_18h_Positive_IPA25pc_noCutoffOfP	chr1	113992579	113992974	chr1:113992579-113992974:mpeak_4230|chr1_113933474_114224833_MAGI3_NM_+|	242.17	+	uc001edh.3:113933655:114224883:+;uc001edk.3:113933655:114226636:+;uc001edi.4:113933655:114224883:+;uc010owm.2:113933655:114224883:+
chr1:113992583-113992916:mpeak_55|chr1_113933474_114224833_MAGI3_NM_+	+	MAGI3	HP-Cyto_6h_Positive_IPA25pc_noCutoffOfP	chr1	113992583	113992947	chr1:113992583-113992947:mpeak_3972|chr1_113933474_114224833_MAGI3_NM_+|	66.08	+	uc001edh.3:113933655:114224883:+;uc001edk.3:113933655:114226636:+;uc001edi.4:113933655:114224883:+;uc010owm.2:113933655:114224883:+
chr1:113992583-113992916:mpeak_55|chr1_113933474_114224833_MAGI3_NM_+	+	MAGI3	HP-Cyto_UT_Positive_IPA25pc_noCutoffOfP	chr1	113992557	113992916	chr1:113992557-113992916:mpeak_4233|chr1_113933474_114224833_MAGI3_NM_+|	96.04	+	uc001edh.3:113933655:114224883:+;uc001edk.3:113933655:114226636:+;uc001edi.4:113933655:114224883:+;uc010owm.2:113933655:114224883:+
chr1:117599050-117599147:mpeak_58|chr1_117569408_117602112_LOC101929099_NR_-	-	LOC101929099	HP-Cyto_UT_Positive_IPA25pc_noCutoffOfP	chr1	117599050	117599153	chr1:117599050-117599153:mpeak_4543|chr1_117569408_117602112_LOC101929099_NR_-|	9.94	-	-
chr1:117963196-117963280:mpeak_59|chr1_117910084_118065446_MAN1A2_NM_+	+	MAN1A2	HP-Cyto_6h_Positive_IPA25pc_noCutoffOfP	chr1	117963196	117963280	chr1:117963196-117963280:mpeak_4305|chr1_117910084_118065446_MAN1A2_NM_+|	125.98	+	uc009whg.1:117911082:118042176:+;uc001ehd.1:117910805:118065579:+
chr1:1327582-1327761:mpeak_1|chr1_1322962_1334718_CCNL2_NM_-	-	CCNL2	HP-Cyto_6h_Positive_IPA25pc_noCutoffOfP	chr1	1327660	1327761	chr1:1327660-1327761:mpeak_79|chr1_1322962_1334718_CCNL2_NM_-|	34.9	-	uc001afi.2:1322610:1334686:-
chr1:1327582-1327761:mpeak_1|chr1_1322962_1334718_CCNL2_NM_-	-	CCNL2	HP-Cyto_UT_Positive_IPA25pc_noCutoffOfP	chr1	1327582	1327931	chr1:1327582-1327931:mpeak_88|chr1_1322962_1334718_CCNL2_NM_-|	85.12	-	uc001afi.2:1322610:1334686:-
chr11:33162957-33163267:mpeak_188|chr11_33106835_33183037_CSTF3_NM_-	-	CSTF3	HP-Cyto_18h_Positive_IPA25pc_noCutoffOfP	chr11	33162957	33163115	chr11:33162957-33163115:mpeak_13148|chr11_33106835_33183037_CSTF3_NM_-|	60.08	-	uc001muh.3:33106632:33182871:-
chr11:34938320-34938371:mpeak_192|chr11_34937676_35016460_PDHX_NM_+	+	PDHX	HP-Cyto_6h_Positive_IPA25pc_noCutoffOfP	chr11	34938294	34938373	chr11:34938294-34938373:mpeak_13221|chr11_34937676_35016460_PDHX_NM_+|	29.5	+	uc001mvt.3:34938202:35016719:+;uc010rep.2:34937918:35016719:+;uc010req.2:34938202:35016719:+
chr11:34978924-34978988:mpeak_195|chr11_34937676_35016460_PDHX_NM_+	+	PDHX	HP-Cyto_18h_Positive_IPA25pc_noCutoffOfP	chr11	34978925	34978992	chr11:34978925-34978992:mpeak_13229|chr11_34937676_35016460_PDHX_NM_+|	20.46	+	uc001mvt.3:34938202:35016719:+;uc010rep.2:34937918:35016719:+;uc010req.2:34938202:35016719:+
chr11:34978924-34978988:mpeak_195|chr11_34937676_35016460_PDHX_NM_+	+	PDHX	HP-Cyto_UT_Positive_IPA25pc_noCutoffOfP	chr11	34978925	34978985	chr11:34978925-34978985:mpeak_14325|chr11_34937676_35016460_PDHX_NM_+|	51.46	+	uc001mvt.3:34938202:35016719:+;uc010rep.2:34937918:35016719:+;uc010req.2:34938202:35016719:+
chr11:440485-440560:mpeak_177|chr11_418589_442011_ANO9_NM_-	-	ANO9	HP-Cyto_18h_Positive_IPA25pc_noCutoffOfP	chr11	440492	440558	chr11:440492-440558:mpeak_12247|chr11_418589_442011_ANO9_NM_-|	7.32	-	uc001lpi.2:418370:441926:-
chr1:144898780-144898842:mpeak_61|chr1_144852499_145076186_PDE4DIP_NM_-	-	PDE4DIP	HP-Cyto_UT_Positive_IPA25pc_noCutoffOfP	chr1	144898781	144898849	chr1:144898781-144898849:mpeak_4814|chr1_144852499_145076186_PDE4DIP_NM_-|	5.11	-	uc001eme.1:144895248:144917872:-;uc001emb.1:144892213:144931708:-;uc001elw.4:144852457:144994731:-;uc021ouh.1:144852353:144994731:-;uc001emd.2:144892437:144994731:-;uc001emc.2:144892213:144994731:-;uc001elx.4:144852457:145039609:-;uc001elk.2:144676869:144994731:-;uc001ell.2:144676869:144994994:-;uc001elm.4:144676869:144994635:-;uc001eln.4:144676869:145039609:-;uc001elo.3:144676869:145075862:-
chr1:144902571-144902846:mpeak_62|chr1_144852499_145076186_PDE4DIP_NM_-	-	PDE4DIP	HP-Cyto_UT_Positive_IPA25pc_noCutoffOfP	chr1	144902525	144902846	chr1:144902525-144902846:mpeak_4816|chr1_144852499_145076186_PDE4DIP_NM_-|	100.47	-	uc001eme.1:144895248:144917872:-;uc001emb.1:144892213:144931708:-;uc001elw.4:144852457:144994731:-;uc021ouh.1:144852353:144994731:-;uc001emd.2:144892437:144994731:-;uc001emc.2:144892213:144994731:-;uc001elx.4:144852457:145039609:-;uc001elk.2:144676869:144994731:-;uc001ell.2:144676869:144994994:-;uc001elm.4:144676869:144994635:-;uc001eln.4:144676869:145039609:-;uc001elo.3:144676869:145075862:-
chr1:144902571-144902846:mpeak_62|chr1_144852499_145076186_PDE4DIP_NM_-	-	PDE4DIP	HP-Cyto_UT_Positive_IPA25pc_noCutoffOfP	chr1	144902925	144902981	chr1:144902925-144902981:mpeak_4817|chr1_144852499_145076186_PDE4DIP_NM_-|	6.66	-	uc001eme.1:144895248:144917872:-;uc001emb.1:144892213:144931708:-;uc001elw.4:144852457:144994731:-;uc021ouh.1:144852353:144994731:-;uc001emd.2:144892437:144994731:-;uc001emc.2:144892213:144994731:-;uc001elx.4:144852457:145039609:-;uc001elk.2:144676869:144994731:-;uc001ell.2:144676869:144994994:-;uc001elm.4:144676869:144994635:-;uc001eln.4:144676869:145039609:-;uc001elo.3:144676869:145075862:-
chr1:145592906-145592970:mpeak_63|chr1_145592256_145611044_POLR3C_NM_-	-	POLR3C	HP-Cyto_UT_Positive_IPA25pc_noCutoffOfP	chr1	145592902	145593041	chr1:145592902-145593041:mpeak_4952|chr1_145592256_145611044_POLR3C_NM_-|	11	-	uc001eog.3:145592689:145610584:-;uc001eoh.3:145592689:145609336:-;uc009wix.3:145592756:145609336:-
chr11:47761117-47761184:mpeak_197|chr11_47739064_47788993_FNBP4_NM_-	-	FNBP4	HP-Cyto_6h_Positive_IPA25pc_noCutoffOfP	chr11	47761058	47761184	chr11:47761058-47761184:mpeak_13511|chr11_47739064_47788993_FNBP4_NM_-|	7.43	-	uc001ngj.3:47738973:47786855:-;uc009ylv.3:47738973:47788840:-
chr11:47765453-47765705:mpeak_198|chr11_47739064_47788993_FNBP4_NM_-	-	FNBP4	HP-Cyto_6h_Positive_IPA25pc_noCutoffOfP	chr11	47765453	47765544	chr11:47765453-47765544:mpeak_13512|chr11_47739064_47788993_FNBP4_NM_-|	9.81	-	uc001ngj.3:47738973:47786855:-;uc009ylv.3:47738973:47788840:-
chr1:150917717-150917801:mpeak_71|chr1_150898814_150936722_SETDB1_NM_+	+	SETDB1	HP-Cyto_6h_Positive_IPA25pc_noCutoffOfP	chr1	150917732	150917800	chr1:150917732-150917800:mpeak_5019|chr1_150898814_150936722_SETDB1_NM_+|	39.99	+	uc009wmf.2:150900190:150923564:+;uc009wmg.2:150900190:150936322:+;uc001evv.2:150900190:150936840:+;uc001evu.2:150900190:150936840:+
chr1:150978281-150978334:mpeak_72|chr1_150969843_150980854_FAM63A_NM_-	-	FAM63A	HP-Cyto_18h_Positive_IPA25pc_noCutoffOfP	chr1	150978281	150978334	chr1:150978281-150978334:mpeak_5239|chr1_150969843_150980854_FAM63A_NM_-|	3.21	-	uc010pcn.2:150969762:150978631:-
chr1:151022675-151022780:mpeak_73|chr1_151020258_151022913_C1orf56_NM_+	+	C1orf56	HP-Cyto_6h_Positive_IPA25pc_noCutoffOfP	chr1	151022675	151022734	chr1:151022675-151022734:mpeak_5046|chr1_151020258_151022913_C1orf56_NM_+|	24.81	+	uc001ewn.3:151020323:151022934:+
chr1:151867305-151867483:mpeak_76|chr1_151847404_151882361_THEM4_NM_-	-	THEM4	HP-Cyto_UT_Positive_IPA25pc_noCutoffOfP	chr1	151867309	151867483	chr1:151867309-151867483:mpeak_5653|chr1_151847404_151882361_THEM4_NM_-|	18.24	-	uc001ezj.2:151847363:151881934:-
chr1:155648893-155649049:mpeak_81|chr1_155630724_155658823_YY1AP1_NM_-	-	YY1AP1	HP-Cyto_18h_Positive_IPA25pc_noCutoffOfP	chr1	155648899	155649047	chr1:155648899-155649047:mpeak_5648|chr1_155630724_155658823_YY1AP1_NM_-|	121.55	-	uc010pgh.2:155629447:155649291:-;uc009wqt.3:155629447:155649291:-;uc001flh.3:155629447:155658255:-;uc010pgi.2:155629447:155658255:-;uc009wqx.3:155631019:155658255:-;uc010pgk.2:155638560:155658255:-;uc001fll.3:155629447:155650227:-;uc001flk.3:155629447:155649291:-;uc001flm.3:155629447:155649291:-;uc009wqw.3:155629447:155649291:-;uc001flj.3:155629447:155650227:-;uc001fli.3:155629447:155650227:-;uc0…
chr1:155648893-155649049:mpeak_81|chr1_155630724_155658823_YY1AP1_NM_-	-	YY1AP1	HP-Cyto_6h_Positive_IPA25pc_noCutoffOfP	chr1	155648901	155649049	chr1:155648901-155649049:mpeak_5487|chr1_155630724_155658823_YY1AP1_NM_-|	217.6	-	uc010pgh.2:155629447:155649291:-;uc009wqt.3:155629447:155649291:-;uc001flh.3:155629447:155658255:-;uc010pgi.2:155629447:155658255:-;uc009wqx.3:155631019:155658255:-;uc010pgk.2:155638560:155658255:-;uc001fll.3:155629447:155650227:-;uc001flk.3:155629447:155649291:-;uc001flm.3:155629447:155649291:-;uc009wqw.3:155629447:155649291:-;uc001flj.3:155629447:155650227:-;uc001fli.3:155629447:155650227:-;uc0…
chr11:61913083-61913238:mpeak_202|chr11_61891444_61919233_INCENP_NM_+	+	INCENP	HP-Cyto_6h_Positive_IPA25pc_noCutoffOfP	chr11	61913083	61913241	chr11:61913083-61913241:mpeak_13796|chr11_61891444_61919233_INCENP_NM_+|	16.61	+	uc009ynw.1:61895633:61916026:+;uc001nsw.1:61895633:61919448:+;uc001nsx.1:61895633:61919448:+
chr11:66417299-66417449:mpeak_207|chr11_66406087_66433326_RBM4_NM_+	+	RBM4	HP-Cyto_18h_Positive_IPA25pc_noCutoffOfP	chr11	66417349	66417405	chr11:66417349-66417405:mpeak_14289|chr11_66406087_66433326_RBM4_NM_+|	7.05	+	uc010rpj.2:66407182:66433436:+
chr11:66417299-66417449:mpeak_207|chr11_66406087_66433326_RBM4_NM_+	+	RBM4	HP-Cyto_6h_Positive_IPA25pc_noCutoffOfP	chr11	66417350	66417407	chr11:66417350-66417407:mpeak_14338|chr11_66406087_66433326_RBM4_NM_+|	12	+	uc010rpj.2:66407182:66433436:+
chr11:66417299-66417449:mpeak_207|chr11_66406087_66433326_RBM4_NM_+	+	RBM4	HP-Cyto_UT_Positive_IPA25pc_noCutoffOfP	chr11	66417299	66417449	chr11:66417299-66417449:mpeak_15496|chr11_66406087_66433326_RBM4_NM_+|	14.54	+	uc010rpj.2:66407182:66433436:+
chr11:67933180-67933279:mpeak_209|chr11_67926638_67981239_SUV420H1_NM_-	-	SUV420H1	HP-Cyto_6h_Positive_IPA25pc_noCutoffOfP	chr11	67933179	67933279	chr11:67933179-67933279:mpeak_14459|chr11_67926638_67981239_SUV420H1_NM_-|	92.94	-	uc001onm.1:67925154:67957543:-;uc001onn.1:67925154:67942511:-;uc009ysf.2:67925154:67939109:-
chr11:76503792-76503847:mpeak_217|chr11_76493356_76506652_TSKU_NM_+	+	TSKU	HP-Cyto_6h_Positive_IPA25pc_noCutoffOfP	chr11	76503792	76503844	chr11:76503792-76503844:mpeak_14919|chr11_76493356_76506652_TSKU_NM_+|	18.62	+	-
chr11:77524196-77524381:mpeak_220|chr11_77378536_77531880_RSF1_NM_-	-	RSF1	HP-Cyto_UT_Positive_IPA25pc_noCutoffOfP	chr11	77524198	77524257	chr11:77524198-77524257:mpeak_16227|chr11_77378536_77531880_RSF1_NM_-|	15.55	-	uc001oyo.1:77475582:77531760:-;uc001oyn.3:77377961:77531760:-
chr11:82869726-82869941:mpeak_223|chr11_82868136_82895720_PCF11_NM_+	+	PCF11	HP-Cyto_6h_Positive_IPA25pc_noCutoffOfP	chr11	82869820	82869939	chr11:82869820-82869939:mpeak_15042|chr11_82868136_82895720_PCF11_NM_+|	24.86	+	uc010rsu.1:82868481:82881037:+;uc001ozx.4:82868481:82895936:+
chr11:82869726-82869941:mpeak_223|chr11_82868136_82895720_PCF11_NM_+	+	PCF11	HP-Cyto_UT_Positive_IPA25pc_noCutoffOfP	chr11	82869726	82869941	chr11:82869726-82869941:mpeak_16300|chr11_82868136_82895720_PCF11_NM_+|	81.16	+	uc010rsu.1:82868481:82881037:+;uc001ozx.4:82868481:82895936:+
chr11:82905443-82905567:mpeak_225|chr11_82904780_82923694_ANKRD42_NR_+	+	ANKRD42	HP-Cyto_6h_Positive_IPA25pc_noCutoffOfP	chr11	82905467	82905567	chr11:82905467-82905567:mpeak_15055|chr11_82904780_82923694_ANKRD42_NR_+mpeak_15055|chr11_82904780_82966886_ANKRD42_NM_+||	5.52	+	-
chr1:190443671-190443789:mpeak_92|chr1_190068264_190446759_BRINP3_NM_-	-	BRINP3	HP-Cyto_6h_Positive_IPA25pc_noCutoffOfP	chr1	190443657	190443791	chr1:190443657-190443791:mpeak_6670|chr1_190068264_190446759_BRINP3_NM_-|	5.71	-	-
chr1:206702329-206702379:mpeak_95|chr1_206680862_206760157_RASSF5_NM_+	+	RASSF5	HP-Cyto_6h_Positive_IPA25pc_noCutoffOfP	chr1	206702492	206702551	chr1:206702492-206702551:mpeak_7209|chr1_206680862_206760157_RASSF5_NM_+|	9.17	+	uc001hec.1:206680935:206758081:+;uc001hed.3:206680935:206760310:+;uc001hee.3:206680935:206760180:+
chr1:206702499-206702551:mpeak_96|chr1_206680862_206760157_RASSF5_NM_+	+	RASSF5	HP-Cyto_6h_Positive_IPA25pc_noCutoffOfP	chr1	206702492	206702551	chr1:206702492-206702551:mpeak_7209|chr1_206680862_206760157_RASSF5_NM_+|	9.17	+	uc001hec.1:206680935:206758081:+;uc001hed.3:206680935:206760310:+;uc001hee.3:206680935:206760180:+
chr1:211564986-211565047:mpeak_97|chr1_211556096_211605660_LINC00467_NR_+	+	LINC00467	HP-Cyto_18h_Positive_IPA25pc_noCutoffOfP	chr1	211564986	211565047	chr1:211564986-211565047:mpeak_7462|chr1_211556096_211605660_LINC00467_NR_+|	5.08	+	-
chr1:211564986-211565047:mpeak_97|chr1_211556096_211605660_LINC00467_NR_+	+	LINC00467	HP-Cyto_6h_Positive_IPA25pc_noCutoffOfP	chr1	211564991	211565048	chr1:211564991-211565048:mpeak_7314|chr1_211556096_211605660_LINC00467_NR_+|	12.53	+	-
chr1:211571645-211571739:mpeak_98|chr1_211556096_211605660_LINC00467_NR_+	+	LINC00467	HP-Cyto_18h_Positive_IPA25pc_noCutoffOfP	chr1	211571645	211571739	chr1:211571645-211571739:mpeak_7464|chr1_211556096_211605660_LINC00467_NR_+|	3.5	+	-
chr1:211571645-211571739:mpeak_98|chr1_211556096_211605660_LINC00467_NR_+	+	LINC00467	HP-Cyto_UT_Positive_IPA25pc_noCutoffOfP	chr1	211571646	211571739	chr1:211571646-211571739:mpeak_7998|chr1_211556096_211605660_LINC00467_NR_+|	10.31	+	-
chr1:211572439-211572564:mpeak_99|chr1_211556096_211605660_LINC00467_NR_+	+	LINC00467	HP-Cyto_18h_Positive_IPA25pc_noCutoffOfP	chr1	211572443	211572494	chr1:211572443-211572494:mpeak_7465|chr1_211556096_211605660_LINC00467_NR_+|	2.69	+	-
chr1:211572439-211572564:mpeak_99|chr1_211556096_211605660_LINC00467_NR_+	+	LINC00467	HP-Cyto_UT_Positive_IPA25pc_noCutoffOfP	chr1	211572439	211572564	chr1:211572439-211572564:mpeak_7999|chr1_211556096_211605660_LINC00467_NR_+|	10.19	+	-
chr12:122803763-122803898:mpeak_292|chr12_122757647_122907116_CLIP1_NM_-	-	CLIP1	HP-Cyto_6h_Positive_IPA25pc_noCutoffOfP	chr12	122803767	122803898	chr12:122803767-122803898:mpeak_20731|chr12_122757647_122907116_CLIP1_NM_-|	25.26	-	uc001ucg.2:122757421:122864999:-;uc001uch.1:122757421:122864999:-;uc001uci.1:122757421:122864999:-;uc001ucj.1:122762700:122845613:-
chr12:12351822-12351894:mpeak_246|chr12_12274354_12419811_LRP6_NM_-	-	LRP6	HP-Cyto_18h_Positive_IPA25pc_noCutoffOfP	chr12	12351821	12351890	chr12:12351821-12351890:mpeak_16779|chr12_12274354_12419811_LRP6_NM_-|	1440.33	-	uc001rah.4:12274059:12419669:-;uc010shl.1:12274059:12419669:-
chr12:12351822-12351894:mpeak_246|chr12_12274354_12419811_LRP6_NM_-	-	LRP6	HP-Cyto_6h_Positive_IPA25pc_noCutoffOfP	chr12	12351822	12351889	chr12:12351822-12351889:mpeak_16658|chr12_12274354_12419811_LRP6_NM_-|	28.23	-	uc001rah.4:12274059:12419669:-;uc010shl.1:12274059:12419669:-
chr12:12351822-12351894:mpeak_246|chr12_12274354_12419811_LRP6_NM_-	-	LRP6	HP-Cyto_UT_Positive_IPA25pc_noCutoffOfP	chr12	12351828	12351888	chr12:12351828-12351888:mpeak_18011|chr12_12274354_12419811_LRP6_NM_-|	68.71	-	uc001rah.4:12274059:12419669:-;uc010shl.1:12274059:12419669:-
chr12:123801834-123801912:mpeak_294|chr12_123780597_123834988_SBNO1_NM_-	-	SBNO1	HP-Cyto_18h_Positive_IPA25pc_noCutoffOfP	chr12	123801827	123801912	chr12:123801827-123801912:mpeak_20509|chr12_123780597_123834988_SBNO1_NM_-|	41.17	-	uc010tao.2:123780454:123834988:-;uc010tap.2:123780454:123834988:-
chr12:123820918-123821045:mpeak_296|chr12_123780597_123834988_SBNO1_NM_-	-	SBNO1	HP-Cyto_18h_Positive_IPA25pc_noCutoffOfP	chr12	123820918	123821040	chr12:123820918-123821040:mpeak_20515|chr12_123780597_123834988_SBNO1_NM_-|	30.26	-	uc010tao.2:123780454:123834988:-;uc010tap.2:123780454:123834988:-;uc001ueu.2:123805246:123834988:-;uc001uet.2:123805246:123834988:-;uc001uev.2:123805246:123834988:-;uc009zxy.1:123805246:123834988:-
chr1:212532026-212532133:mpeak_101|chr1_212458878_212533979_PPP2R5A_NM_+	+	PPP2R5A	HP-Cyto_6h_Positive_IPA25pc_noCutoffOfP	chr1	212532022	212532133	chr1:212532022-212532133:mpeak_7365|chr1_212458878_212533979_PPP2R5A_NM_+|	42.24	+	uc010ptd.2:212475424:212534112:+;uc001hjb.3:212459452:212534112:+
chr1:212532026-212532133:mpeak_101|chr1_212458878_212533979_PPP2R5A_NM_+	+	PPP2R5A	HP-Cyto_UT_Positive_IPA25pc_noCutoffOfP	chr1	212532023	212532133	chr1:212532023-212532133:mpeak_8049|chr1_212458878_212533979_PPP2R5A_NM_+|	61.85	+	uc010ptd.2:212475424:212534112:+;uc001hjb.3:212459452:212534112:+
chr1:214787063-214787263:mpeak_103|chr1_214776531_214836933_CENPF_NM_+	+	CENPF	HP-Cyto_18h_Positive_IPA25pc_noCutoffOfP	chr1	214787062	214787263	chr1:214787062-214787263:mpeak_7574|chr1_214776531_214836933_CENPF_NM_+|	13.31	+	uc001hkm.3:214787097:214837137:+
chr1:214787063-214787263:mpeak_103|chr1_214776531_214836933_CENPF_NM_+	+	CENPF	HP-Cyto_6h_Positive_IPA25pc_noCutoffOfP	chr1	214787063	214787266	chr1:214787063-214787266:mpeak_7430|chr1_214776531_214836933_CENPF_NM_+|	23	+	uc001hkm.3:214787097:214837137:+
chr12:19460616-19460698:mpeak_247|chr12_19282625_19528464_PLEKHA5_NM_+	+	PLEKHA5	HP-Cyto_18h_Positive_IPA25pc_noCutoffOfP	chr12	19460616	19460698	chr12:19460616-19460698:mpeak_16966|chr12_19282625_19528464_PLEKHA5_NM_+|	409.28	+	uc009zin.3:19422718:19522721:+;uc010sig.2:19407991:19522721:+;uc010sih.1:19407991:19514638:+;uc001rec.1:19427558:19514638:+;uc010sie.2:19282733:19514638:+;uc001rea.3:19282733:19522721:+;uc031qgo.1:19282733:19522721:+;uc001reb.3:19282733:19522721:+
chr12:19460616-19460698:mpeak_247|chr12_19282625_19528464_PLEKHA5_NM_+	+	PLEKHA5	HP-Cyto_6h_Positive_IPA25pc_noCutoffOfP	chr12	19460627	19460698	chr12:19460627-19460698:mpeak_16867|chr12_19282625_19528464_PLEKHA5_NM_+|	44.99	+	uc009zin.3:19422718:19522721:+;uc010sig.2:19407991:19522721:+;uc010sih.1:19407991:19514638:+;uc001rec.1:19427558:19514638:+;uc010sie.2:19282733:19514638:+;uc001rea.3:19282733:19522721:+;uc031qgo.1:19282733:19522721:+;uc001reb.3:19282733:19522721:+
chr1:226175591-226175869:mpeak_106|chr1_226173224_226187066_SDE2_NM_-	-	SDE2	HP-Cyto_6h_Positive_IPA25pc_noCutoffOfP	chr1	226175589	226175860	chr1:226175589-226175860:mpeak_7763|chr1_226173224_226187066_SDE2_NM_-|	19.72	-	uc001hpu.4:226173002:226187013:-
chr1:231374882-231374950:mpeak_108|chr1_231360160_231376933_C1orf131_NM_-	-	C1orf131	HP-Cyto_18h_Positive_IPA25pc_noCutoffOfP	chr1	231374882	231374948	chr1:231374882-231374948:mpeak_8151|chr1_231360160_231376933_C1orf131_NM_-|	7.68	-	uc001hul.3:231360024:231376887:-;uc001hum.3:231360024:231376887:-;uc001hun.1:231361212:231376887:-;uc010pwd.1:231362451:231376887:-;uc001huo.1:231374551:231376887:-
chr1:233231397-233231453:mpeak_109|chr1_233120223_233431459_PCNXL2_NM_-	-	PCNXL2	HP-Cyto_6h_Positive_IPA25pc_noCutoffOfP	chr1	233231397	233231453	chr1:233231397-233231453:mpeak_8012|chr1_233120223_233431459_PCNXL2_NM_-|	6.87	-	uc001hvl.2:233120049:233431224:-
chr1:233231397-233231453:mpeak_109|chr1_233120223_233431459_PCNXL2_NM_-	-	PCNXL2	HP-Cyto_UT_Positive_IPA25pc_noCutoffOfP	chr1	233231401	233231453	chr1:233231401-233231453:mpeak_8752|chr1_233120223_233431459_PCNXL2_NM_-|	7.38	-	uc001hvl.2:233120049:233431224:-
chr1:235359339-235359491:mpeak_110|chr1_235331967_235491532_ARID4B_NM_-	-	ARID4B	HP-Cyto_18h_Positive_IPA25pc_noCutoffOfP	chr1	235359339	235359435	chr1:235359339-235359435:mpeak_8291|chr1_235331967_235491532_ARID4B_NM_-|	88.61	-	uc001hwt.4:235344864:235388030:-;uc021pks.1:235331839:235490234:-;uc001hwq.3:235331839:235490234:-;uc001hwr.3:235331839:235490234:-;uc001hws.4:235341088:235490234:-
chr1:243469688-243469750:mpeak_114|chr1_243419306_243663057_SDCCAG8_NM_+	+	SDCCAG8	HP-Cyto_6h_Positive_IPA25pc_noCutoffOfP	chr1	243469688	243469748	chr1:243469688-243469748:mpeak_8228|chr1_243419306_243663057_SDCCAG8_NM_+|	6.02	+	uc001hzw.3:243419475:243663087:+;uc010pyk.2:243449588:243663087:+;uc010pyl.2:243449588:243663087:+;uc001hzx.3:243449588:243663087:+
chr1:243469688-243469750:mpeak_114|chr1_243419306_243663057_SDCCAG8_NM_+	+	SDCCAG8	HP-Cyto_UT_Positive_IPA25pc_noCutoffOfP	chr1	243469688	243469746	chr1:243469688-243469746:mpeak_8970|chr1_243419306_243663057_SDCCAG8_NM_+|	7.46	+	uc001hzw.3:243419475:243663087:+;uc010pyk.2:243449588:243663087:+;uc010pyl.2:243449588:243663087:+;uc001hzx.3:243449588:243663087:+
chr12:48093308-48093519:mpeak_254|chr12_48057373_48099844_RPAP3_NM_-	-	RPAP3	HP-Cyto_18h_Positive_IPA25pc_noCutoffOfP	chr12	48093308	48093519	chr12:48093308-48093519:mpeak_17587|chr12_48057373_48099844_RPAP3_NM_-|	20.5	-	uc001rpr.3:48057287:48096623:-;uc001rps.3:48057287:48096623:-
chr12:48093308-48093519:mpeak_254|chr12_48057373_48099844_RPAP3_NM_-	-	RPAP3	HP-Cyto_UT_Positive_IPA25pc_noCutoffOfP	chr12	48093306	48093519	chr12:48093306-48093519:mpeak_18927|chr12_48057373_48099844_RPAP3_NM_-|	36.61	-	uc001rpr.3:48057287:48096623:-;uc001rps.3:48057287:48096623:-
chr12:48093308-48093519:mpeak_254|chr12_48057373_48099844_RPAP3_NM_-	-	RPAP3	HP-Cyto_UT_Positive_IPA25pc_noCutoffOfP	chr12	48093656	48093845	chr12:48093656-48093845:mpeak_18928|chr12_48057373_48099844_RPAP3_NM_-|	30.01	-	uc001rpr.3:48057287:48096623:-;uc001rps.3:48057287:48096623:-
chr12:51874333-51874396:mpeak_257|chr12_51785100_51901209_SLC4A8_NM_+	+	SLC4A8	HP-Cyto_UT_Positive_IPA25pc_noCutoffOfP	chr12	51874334	51874396	chr12:51874334-51874396:mpeak_19317|chr12_51785100_51901209_SLC4A8_NM_+|	8.81	+	uc001rym.4:51844688:51890962:+;uc001ryn.4:51844688:51890962:+;uc001ryv.4:51844688:51901222:+;uc010snj.2:51796944:51890962:+;uc001ryr.3:51818771:51890962:+;uc001rys.2:51818771:51901222:+
chr12:56307527-56307676:mpeak_260|chr12_56296139_56321697_WIBG_NM_-	-	WIBG	HP-Cyto_6h_Positive_IPA25pc_noCutoffOfP	chr12	56307516	56307676	chr12:56307516-56307676:mpeak_18249|chr12_56296139_56321697_WIBG_NM_-|	45.84	-	uc001sie.1:56295655:56320893:-;uc001sif.1:56295655:56321545:-
chr12:62946649-62946824:mpeak_263|chr12_62860596_62986365_MON2_NM_+	+	MON2	HP-Cyto_18h_Positive_IPA25pc_noCutoffOfP	chr12	62946648	62946736	chr12:62946648-62946736:mpeak_18530|chr12_62860596_62986365_MON2_NM_+|	114.23	+	uc001sre.3:62860987:62986529:+;uc009zqj.3:62860987:62982673:+;uc010ssl.2:62887735:62986529:+;uc010ssm.2:62860987:62986529:+;uc010ssn.2:62860987:62986529:+;uc001srf.3:62895400:62986529:+
chr12:64615477-64615532:mpeak_264|chr12_64581432_64616076_C12orf66_NM_-	-	C12orf66	HP-Cyto_6h_Positive_IPA25pc_noCutoffOfP	chr12	64615477	64615532	chr12:64615477-64615532:mpeak_18689|chr12_64581432_64616076_C12orf66_NM_-|	8.4	-	uc001srw.4:64587621:64616017:-
chr12:64868002-64868277:mpeak_265|chr12_64845839_64895109_TBK1_NM_+	+	TBK1	HP-Cyto_6h_Positive_IPA25pc_noCutoffOfP	chr12	64868004	64868277	chr12:64868004-64868277:mpeak_18707|chr12_64845839_64895109_TBK1_NM_+|	17.26	+	uc001ssc.2:64849650:64895161:+
chr12:64868002-64868277:mpeak_265|chr12_64845839_64895109_TBK1_NM_+	+	TBK1	HP-Cyto_UT_Positive_IPA25pc_noCutoffOfP	chr12	64868002	64868277	chr12:64868002-64868277:mpeak_20156|chr12_64845839_64895109_TBK1_NM_+|	46.29	+	uc001ssc.2:64849650:64895161:+
chr12:64891485-64891542:mpeak_266|chr12_64845839_64895109_TBK1_NM_+	+	TBK1	HP-Cyto_6h_Positive_IPA25pc_noCutoffOfP	chr12	64891485	64891539	chr12:64891485-64891539:mpeak_18711|chr12_64845839_64895109_TBK1_NM_+|	13.32	+	uc001ssc.2:64849650:64895161:+
chr12:65633961-65634021:mpeak_268|chr12_65563350_65639941_LEMD3_NM_+	+	LEMD3	HP-Cyto_UT_Positive_IPA25pc_noCutoffOfP	chr12	65633961	65634023	chr12:65633961-65634023:mpeak_20212|chr12_65563350_65639941_LEMD3_NM_+|	127.06	+	uc001ssl.2:65563376:65640105:+;uc009zqo.2:65563376:65640105:+
chr12:66962908-66962963:mpeak_269|chr12_66743026_67072925_GRIP1_NM_-	-	GRIP1	HP-Cyto_6h_Positive_IPA25pc_noCutoffOfP	chr12	66962903	66962962	chr12:66962903-66962962:mpeak_18797|chr12_66743026_67072925_GRIP1_NM_-|	7.27	-	uc001stk.3:66742798:67072684:-;uc001stm.3:66742798:67072684:-
chr12:66962908-66962963:mpeak_269|chr12_66743026_67072925_GRIP1_NM_-	-	GRIP1	HP-Cyto_UT_Positive_IPA25pc_noCutoffOfP	chr12	66962908	66962964	chr12:66962908-66962964:mpeak_20260|chr12_66743026_67072925_GRIP1_NM_-|	11.04	-	uc001stk.3:66742798:67072684:-;uc001stm.3:66742798:67072684:-
chr1:29643586-29643647:mpeak_19|chr1_29563027_29652110_PTPRU_NM_+	+	PTPRU	HP-Cyto_18h_Positive_IPA25pc_noCutoffOfP	chr1	29643586	29643647	chr1:29643586-29643647:mpeak_1517|chr1_29563027_29652110_PTPRU_NM_+|	24.41	+	uc001bru.3:29563156:29652173:+;uc009vtq.3:29563156:29652173:+;uc009vtr.3:29563156:29652173:+;uc001brw.3:29563156:29652173:+
chr12:9794528-9794581:mpeak_245|chr12_9769879_9809516_LOC374443_NR_+	+	LOC374443	HP-Cyto_18h_Positive_IPA25pc_noCutoffOfP	chr12	9794528	9794581	chr12:9794528-9794581:mpeak_16697|chr12_9769879_9809516_LOC374443_NR_+|	7.41	+	-
chr12:98925452-98925690:mpeak_278|chr12_98909350_98941350_TMPO_NM_+	+	TMPO	HP-Cyto_6h_Positive_IPA25pc_noCutoffOfP	chr12	98925455	98925624	chr12:98925455-98925624:mpeak_19537|chr12_98909350_98941350_TMPO_NM_+|	280.64	+	uc001tfh.2:98909645:98928120:+;uc001tfi.2:98909645:98931434:+;uc001tfj.3:98909645:98941636:+;uc001tfk.3:98909645:98941636:+
chr12:98929301-98929433:mpeak_279|chr12_98909350_98941350_TMPO_NM_+	+	TMPO	HP-Cyto_6h_Positive_IPA25pc_noCutoffOfP	chr12	98929301	98929431	chr12:98929301-98929431:mpeak_19545|chr12_98909350_98941350_TMPO_NM_+|	545.69	+	uc001tfi.2:98909645:98931434:+;uc001tfj.3:98909645:98941636:+;uc001tfk.3:98909645:98941636:+
chr12:98929301-98929433:mpeak_279|chr12_98909350_98941350_TMPO_NM_+	+	TMPO	HP-Cyto_UT_Positive_IPA25pc_noCutoffOfP	chr12	98929348	98929432	chr12:98929348-98929432:mpeak_21033|chr12_98909350_98941350_TMPO_NM_+|	671.28	+	uc001tfi.2:98909645:98931434:+;uc001tfj.3:98909645:98941636:+;uc001tfk.3:98909645:98941636:+
chr13:111933360-111933469:mpeak_335|chr13_111767623_111955337_ARHGEF7_NM_+	+	ARHGEF7	HP-Cyto_6h_Positive_IPA25pc_noCutoffOfP	chr13	111933360	111933469	chr13:111933360-111933469:mpeak_22921|chr13_111767623_111955337_ARHGEF7_NM_+|	5.9	+	uc001vrs.2:111767873:111944679:+;uc001vrr.2:111767873:111944679:+;uc001vrt.2:111767873:111944679:+;uc001vrv.4:111870028:111955460:+;uc001vrw.4:111870028:111955460:+;uc001vrx.4:111870028:111955460:+;uc010tjo.2:111855458:111955460:+;uc010tjp.1:111893629:111944679:+
chr13:115087811-115087920:mpeak_337|chr13_115079964_115089262_CHAMP1_NM_+	+	CHAMP1	HP-Cyto_6h_Positive_IPA25pc_noCutoffOfP	chr13	115087811	115087914	chr13:115087811-115087914:mpeak_23022|chr13_115079964_115089262_CHAMP1_NM_+|	16.22	+	-
chr1:33234414-33234558:mpeak_22|chr1_33207511_33238465_KIAA1522_NM_+	+	KIAA1522	HP-Cyto_18h_Positive_IPA25pc_noCutoffOfP	chr1	33234446	33234503	chr1:33234446-33234503:mpeak_1670|chr1_33207511_33238465_KIAA1522_NM_+|	19.75	+	uc001bvv.2:33231370:33238488:+;uc010ohn.1:33231370:33238488:+;uc001bvu.1:33207555:33238488:+;uc010ohm.1:33219690:33238488:+
chr13:33222915-33223024:mpeak_315|chr13_33160563_33349154_PDS5B_NM_+	+	PDS5B	HP-Cyto_UT_Positive_IPA25pc_noCutoffOfP	chr13	33222916	33223024	chr13:33222916-33223024:mpeak_23361|chr13_33160563_33349154_PDS5B_NM_+|	81.21	+	uc001uun.3:33222909:33226201:+;uc001uuo.3:33222909:33262827:+;uc010abf.3:33222909:33349190:+
chr13:41808016-41808069:mpeak_318|chr13_41791364_41837713_MTRF1_NM_-	-	MTRF1	HP-Cyto_6h_Positive_IPA25pc_noCutoffOfP	chr13	41808016	41808067	chr13:41808016-41808067:mpeak_21943|chr13_41791364_41837713_MTRF1_NM_-|	4.17	-	uc001uxx.3:41791250:41835043:-;uc001uxy.3:41791250:41835043:-;uc001uxz.3:41791250:41828679:-;uc010tff.2:41791327:41837441:-
chr13:42438371-42438428:mpeak_321|chr13_42142441_42535221_VWA8_NM_-	-	VWA8	HP-Cyto_6h_Positive_IPA25pc_noCutoffOfP	chr13	42438371	42438426	chr13:42438371-42438426:mpeak_21967|chr13_42142441_42535221_VWA8_NM_-|	4.79	-	uc001uyj.3:42142332:42535151:-;uc001uyk.3:42293722:42535151:-
chr13:42640805-42640858:mpeak_324|chr13_42614171_42803234_DGKH_NM_+	+	DGKH	HP-Cyto_6h_Positive_IPA25pc_noCutoffOfP	chr13	42640807	42640863	chr13:42640807-42640863:mpeak_21976|chr13_42614171_42803234_DGKH_NM_+|	16.85	+	uc010tfh.2:42622909:42803287:+;uc001uyl.2:42622909:42803324:+;uc001uym.2:42622909:42803287:+
chr13:48660492-48660603:mpeak_328|chr13_48651447_48669277_MED4_NM_-	-	MED4	HP-Cyto_6h_Positive_IPA25pc_noCutoffOfP	chr13	48660492	48660598	chr13:48660492-48660598:mpeak_22192|chr13_48651447_48669277_MED4_NM_-|	183.36	-	uc010tgf.2:48651274:48664541:-;uc001vby.2:48651274:48669214:-
chr13:48660492-48660603:mpeak_328|chr13_48651447_48669277_MED4_NM_-	-	MED4	HP-Cyto_UT_Positive_IPA25pc_noCutoffOfP	chr13	48660450	48660603	chr13:48660450-48660603:mpeak_23880|chr13_48651447_48669277_MED4_NM_-|	307.26	-	uc010tgf.2:48651274:48664541:-;uc001vby.2:48651274:48669214:-
chr14:103090486-103090536:mpeak_395|chr14_103058995_103192804_RCOR1_NM_+	+	RCOR1	HP-Cyto_6h_Positive_IPA25pc_noCutoffOfP	chr14	103090486	103090536	chr14:103090486-103090536:mpeak_25975|chr14_103058995_103192804_RCOR1_NM_+|	21	+	uc001ymb.4:103059223:103192843:+
chr14:104145799-104145887:mpeak_398|chr14_104095524_104167537_KLC1_NM_+	+	KLC1	HP-Cyto_18h_Positive_IPA25pc_noCutoffOfP	chr14	104145727	104145888	chr14:104145727-104145888:mpeak_25315|chr14_104095524_104167537_KLC1_NM_+|	29.29	+	uc010tye.1:104120913:104151355:+;uc001ynm.1:104120901:104151355:+;uc001ynr.1:104143842:104159955:+;uc001ynq.1:104143842:104159955:+;uc010tyf.2:104120901:104167540:+;uc001yno.3:104120901:104167063:+;uc010tyd.1:104029338:104151355:+
chr14:104152506-104152572:mpeak_399|chr14_104095524_104167537_KLC1_NM_+	+	KLC1	HP-Cyto_18h_Positive_IPA25pc_noCutoffOfP	chr14	104152504	104152572	chr14:104152504-104152572:mpeak_25318|chr14_104095524_104167537_KLC1_NM_+|	511.44	+	uc001ynr.1:104143842:104159955:+;uc001ynq.1:104143842:104159955:+;uc010tyf.2:104120901:104167540:+;uc001yno.3:104120901:104167063:+
chr14:104171332-104171384:mpeak_400|chr14_104165354_104181823_XRCC3_NM_-	-	XRCC3	HP-Cyto_UT_Positive_IPA25pc_noCutoffOfP	chr14	104171329	104171385	chr14:104171329-104171385:mpeak_28168|chr14_104165354_104181823_XRCC3_NM_-|	9.77	-	uc001ynx.4:104165134:104177424:-;uc001yny.4:104165134:104177424:-;uc001ynz.4:104165134:104177424:-;uc001yoa.4:104165134:104177424:-
chr14:32563495-32563595:mpeak_346|chr14_32546494_32623826_ARHGAP5_NM_+	+	ARHGAP5	HP-Cyto_18h_Positive_IPA25pc_noCutoffOfP	chr14	32563495	32563595	chr14:32563495-32563595:mpeak_22983|chr14_32546494_32623826_ARHGAP5_NM_+|	101.33	+	uc001wrl.3:32559875:32624154:+;uc001wrm.3:32559875:32624154:+;uc001wrn.3:32559875:32624154:+;uc001wrp.3:32546571:32624154:+
chr14:38063018-38063146:mpeak_347|chr14_38061916_38064325_FOXA1_NM_-	-	FOXA1	HP-Cyto_6h_Positive_IPA25pc_noCutoffOfP	chr14	38063036	38063142	chr14:38063036-38063142:mpeak_23732|chr14_38061916_38064325_FOXA1_NM_-|	43.72	-	uc001wuf.4:38060569:38064177:-
chr14:50146106-50146402:mpeak_348|chr14_50110388_50155098_POLE2_NM_-	-	POLE2	HP-Cyto_6h_Positive_IPA25pc_noCutoffOfP	chr14	50146191	50146435	chr14:50146191-50146435:mpeak_23888|chr14_50110388_50155098_POLE2_NM_-|	37.05	-	uc001wwu.3:50110369:50154921:-;uc021rsr.1:50110369:50154921:-;uc010ano.3:50116970:50154921:-;uc010anj.1:50033027:50319471:-
chr1:45101957-45102177:mpeak_27|chr1_44870959_45116375_RNF220_NM_+	+	RNF220	HP-Cyto_6h_Positive_IPA25pc_noCutoffOfP	chr1	45102090	45102175	chr1:45102090-45102175:mpeak_2139|chr1_44870959_45116375_RNF220_NM_+|	72.9	+	uc010okz.2:45097826:45115701:+;uc001cma.1:45101230:45115701:+;uc001clx.2:45097826:45116447:+;uc010okx.1:45079928:45110464:+;uc001clv.1:44877769:45116447:+;uc001clw.1:44877769:45116447:+;uc010oky.1:45079928:45116447:+
chr14:51130610-51130911:mpeak_351|chr14_51102102_51135071_SAV1_NM_-	-	SAV1	HP-Cyto_6h_Positive_IPA25pc_noCutoffOfP	chr14	51130382	51130867	chr14:51130382-51130867:mpeak_23970|chr14_51102102_51135071_SAV1_NM_-|	49.27	-	uc001wyh.2:51101900:51134685:-
chr14:51237149-51237291:mpeak_354|chr14_51190390_51297839_NIN_NM_-	-	NIN	HP-Cyto_6h_Positive_IPA25pc_noCutoffOfP	chr14	51237106	51237292	chr14:51237106-51237292:mpeak_23989|chr14_51190390_51297839_NIN_NM_-|	14.97	-	uc001wyi.3:51190180:51288774:-;uc001wym.2:51192589:51288774:-;uc001wyk.3:51192589:51288774:-;uc001wyo.3:51194406:51288774:-;uc001wyp.1:51237105:51288660:-
chr14:51258764-51258818:mpeak_355|chr14_51190390_51297839_NIN_NM_-	-	NIN	HP-Cyto_6h_Positive_IPA25pc_noCutoffOfP	chr14	51258753	51258818	chr14:51258753-51258818:mpeak_23990|chr14_51190390_51297839_NIN_NM_-|	9.39	-	uc001wyi.3:51190180:51288774:-;uc001wym.2:51192589:51288774:-;uc001wyk.3:51192589:51288774:-;uc001wyo.3:51194406:51288774:-;uc001wyp.1:51237105:51288660:-
chr14:55765757-55765959:mpeak_358|chr14_55738020_55817098_FBXO34_NM_+	+	FBXO34	HP-Cyto_6h_Positive_IPA25pc_noCutoffOfP	chr14	55765765	55765949	chr14:55765765-55765949:mpeak_24208|chr14_55738020_55817098_FBXO34_NM_+|	26.95	+	-
chr14:55765757-55765959:mpeak_358|chr14_55738020_55817098_FBXO34_NM_+	+	FBXO34	HP-Cyto_UT_Positive_IPA25pc_noCutoffOfP	chr14	55765772	55765943	chr14:55765772-55765943:mpeak_26114|chr14_55738020_55817098_FBXO34_NM_+|	48.03	+	-
chr14:58740624-58740710:mpeak_359|chr14_58734111_58764855_PSMA3-AS1_NR_-	-	PSMA3-AS1	HP-Cyto_18h_Positive_IPA25pc_noCutoffOfP	chr14	58740631	58740712	chr14:58740631-58740712:mpeak_23769|chr14_58734111_58764855_PSMA3-AS1_NR_-|	35.04	-	uc010tro.2:58471453:58758410:-
chr14:58740624-58740710:mpeak_359|chr14_58734111_58764855_PSMA3-AS1_NR_-	-	PSMA3-AS1	HP-Cyto_6h_Positive_IPA25pc_noCutoffOfP	chr14	58740624	58740712	chr14:58740624-58740712:mpeak_24319|chr14_58734111_58764855_PSMA3-AS1_NR_-|	83.8	-	uc010tro.2:58471453:58758410:-
chr14:58740624-58740710:mpeak_359|chr14_58734111_58764855_PSMA3-AS1_NR_-	-	PSMA3-AS1	HP-Cyto_UT_Positive_IPA25pc_noCutoffOfP	chr14	58740642	58740710	chr14:58740642-58740710:mpeak_26243|chr14_58734111_58764855_PSMA3-AS1_NR_-|	99.85	-	uc010tro.2:58471453:58758410:-
chr14:58758344-58758399:mpeak_361|chr14_58734111_58764855_PSMA3-AS1_NR_-	-	PSMA3-AS1	HP-Cyto_UT_Positive_IPA25pc_noCutoffOfP	chr14	58758344	58758399	chr14:58758344-58758399:mpeak_26248|chr14_58734111_58764855_PSMA3-AS1_NR_-|	57.99	-	uc010tro.2:58471453:58758410:-
chr14:58988299-58988470:mpeak_363|chr14_58894102_59014498_KIAA0586_NM_+	+	KIAA0586	HP-Cyto_18h_Positive_IPA25pc_noCutoffOfP	chr14	58988587	58988646	chr14:58988587-58988646:mpeak_23786|chr14_58894102_59014498_KIAA0586_NM_+|	4.18	+	uc010trt.2:58909433:59003759:+;uc010trr.2:58894346:59014694:+;uc001xdt.4:58896136:59014650:+;uc001xdu.4:58895027:59014650:+;uc010trs.2:58896136:59014650:+;uc001xdv.4:58894982:59014650:+
chr14:58988299-58988470:mpeak_363|chr14_58894102_59014498_KIAA0586_NM_+	+	KIAA0586	HP-Cyto_UT_Positive_IPA25pc_noCutoffOfP	chr14	58988299	58988519	chr14:58988299-58988519:mpeak_26275|chr14_58894102_59014498_KIAA0586_NM_+|	16.5	+	uc010trt.2:58909433:59003759:+;uc010trr.2:58894346:59014694:+;uc001xdt.4:58896136:59014650:+;uc001xdu.4:58895027:59014650:+;uc010trs.2:58896136:59014650:+;uc001xdv.4:58894982:59014650:+
chr14:58988299-58988470:mpeak_363|chr14_58894102_59014498_KIAA0586_NM_+	+	KIAA0586	HP-Cyto_UT_Positive_IPA25pc_noCutoffOfP	chr14	58988542	58988647	chr14:58988542-58988647:mpeak_26276|chr14_58894102_59014498_KIAA0586_NM_+|	12.69	+	uc010trt.2:58909433:59003759:+;uc010trr.2:58894346:59014694:+;uc001xdt.4:58896136:59014650:+;uc001xdu.4:58895027:59014650:+;uc010trs.2:58896136:59014650:+;uc001xdv.4:58894982:59014650:+
chr14:68226366-68226424:mpeak_364|chr14_68215356_68283306_ZFYVE26_NM_-	-	ZFYVE26	HP-Cyto_6h_Positive_IPA25pc_noCutoffOfP	chr14	68226368	68226421	chr14:68226368-68226421:mpeak_24721|chr14_68215356_68283306_ZFYVE26_NM_-|	11.01	-	uc001xkb.3:68217738:68228208:-;uc001xka.2:68215152:68282680:-
chr14:73563618-73563794:mpeak_369|chr14_73525220_73586420_RBM25_NM_+	+	RBM25	HP-Cyto_18h_Positive_IPA25pc_noCutoffOfP	chr14	73563618	73563787	chr14:73563618-73563787:mpeak_24309|chr14_73525220_73586420_RBM25_NM_+|	217.32	+	uc001xnn.4:73538349:73567026:+;uc001xno.3:73538349:73586513:+;uc010ttu.2:73538349:73586513:+;uc001xnp.3:73563694:73586513:+
chr14:73569869-73570193:mpeak_370|chr14_73525220_73586420_RBM25_NM_+	+	RBM25	HP-Cyto_18h_Positive_IPA25pc_noCutoffOfP	chr14	73569854	73570188	chr14:73569854-73570188:mpeak_24312|chr14_73525220_73586420_RBM25_NM_+|	428.43	+	uc001xno.3:73538349:73586513:+;uc010ttu.2:73538349:73586513:+;uc001xnp.3:73563694:73586513:+
chr14:74580899-74580990:mpeak_374|chr14_74551655_74665624_LIN52_NM_+	+	LIN52	HP-Cyto_6h_Positive_IPA25pc_noCutoffOfP	chr14	74580884	74581000	chr14:74580884-74581000:mpeak_25027|chr14_74551655_74665624_LIN52_NM_+|	23.06	+	uc001xpp.2:74551665:74665680:+
chr15:101904981-101905132:mpeak_444|chr15_101845560_102030187_PCSK6_NM_-	-	PCSK6	HP-Cyto_6h_Positive_IPA25pc_noCutoffOfP	chr15	101905012	101905132	chr15:101905012-101905132:mpeak_28972|chr15_101845560_102030187_PCSK6_NM_-|	11.91	-	uc010bpd.3:101845462:101983772:-;uc002bwy.3:101845462:102029873:-;uc010bpe.3:101845462:102029873:-;uc002bxa.2:101853351:102029873:-;uc002bxb.2:101853351:102029873:-;uc002bxc.1:101887927:102029873:-;uc002bxd.1:101887968:102029873:-
chr15:41745089-41745148:mpeak_409|chr15_41709301_41772778_RTF1_NM_+	+	RTF1	HP-Cyto_6h_Positive_IPA25pc_noCutoffOfP	chr15	41745089	41745148	chr15:41745089-41745148:mpeak_26615|chr15_41709301_41772778_RTF1_NM_+|	81.94	+	uc001zny.3:41709313:41772885:+
chr15:43094062-43094138:mpeak_411|chr15_43038455_43213007_TTBK2_NM_-	-	TTBK2	HP-Cyto_UT_Positive_IPA25pc_noCutoffOfP	chr15	43094047	43094138	chr15:43094047-43094138:mpeak_28888|chr15_43038455_43213007_TTBK2_NM_-|	9.2	-	uc001zqo.2:43037992:43170815:-;uc010bcy.2:43037992:43170756:-;uc001zqp.3:43069200:43170815:-
chr15:44116679-44116750:mpeak_412|chr15_44097474_44116951_MFAP1_NM_-	-	MFAP1	HP-Cyto_18h_Positive_IPA25pc_noCutoffOfP	chr15	44116679	44116751	chr15:44116679-44116751:mpeak_26192|chr15_44097474_44116951_MFAP1_NM_-|	8.81	-	uc001zth.1:44097291:44116767:-
chr15:50905889-50906020:mpeak_416|chr15_50854005_50979012_TRPM7_NM_-	-	TRPM7	HP-Cyto_18h_Positive_IPA25pc_noCutoffOfP	chr15	50905893	50906018	chr15:50905893-50906018:mpeak_26424|chr15_50854005_50979012_TRPM7_NM_-|	159.64	-	uc010bew.2:50875285:50978730:-;uc001zyu.3:50897053:50916476:-;uc001zyt.4:50853874:50978730:-
chr15:56030313-56030557:mpeak_417|chr15_55912464_56035317_PRTG_NM_-	-	PRTG	HP-Cyto_UT_Positive_IPA25pc_noCutoffOfP	chr15	56030313	56030557	chr15:56030313-56030557:mpeak_29562|chr15_55912464_56035317_PRTG_NM_-|	4.6	-	uc002adg.3:55912209:56035129:-
chr15:65456363-65456422:mpeak_424|chr15_65443251_65477563_CLPX_NM_-	-	CLPX	HP-Cyto_6h_Positive_IPA25pc_noCutoffOfP	chr15	65456363	65456428	chr15:65456363-65456428:mpeak_27791|chr15_65443251_65477563_CLPX_NM_-|	21.88	-	uc002aom.3:65443160:65477491:-;uc010bhg.1:65449169:65477491:-
chr15:65456363-65456422:mpeak_424|chr15_65443251_65477563_CLPX_NM_-	-	CLPX	HP-Cyto_UT_Positive_IPA25pc_noCutoffOfP	chr15	65456363	65456422	chr15:65456363-65456422:mpeak_29971|chr15_65443251_65477563_CLPX_NM_-|	30.83	-	uc002aom.3:65443160:65477491:-;uc010bhg.1:65449169:65477491:-
chr15:66786152-66786296:mpeak_425|chr15_66783055_66790146_SNAPC5_NM_-	-	SNAPC5	HP-Cyto_UT_Positive_IPA25pc_noCutoffOfP	chr15	66786150	66786289	chr15:66786150-66786289:mpeak_30047|chr15_66783055_66790146_SNAPC5_NM_-|	25.98	-	-
chr15:66786152-66786296:mpeak_425|chr15_66783055_66790146_SNAPC5_NM_-	-	SNAPC5	HP-Cyto_UT_Positive_IPA25pc_noCutoffOfP	chr15	66786331	66786721	chr15:66786331-66786721:mpeak_30048|chr15_66783055_66790146_SNAPC5_NM_-|	45.71	-	-
chr15:66786331-66786899:mpeak_426|chr15_66783055_66790146_SNAPC5_NM_-	-	SNAPC5	HP-Cyto_UT_Positive_IPA25pc_noCutoffOfP	chr15	66786150	66786289	chr15:66786150-66786289:mpeak_30047|chr15_66783055_66790146_SNAPC5_NM_-|	25.98	-	-
chr15:66786331-66786899:mpeak_426|chr15_66783055_66790146_SNAPC5_NM_-	-	SNAPC5	HP-Cyto_UT_Positive_IPA25pc_noCutoffOfP	chr15	66786331	66786721	chr15:66786331-66786721:mpeak_30048|chr15_66783055_66790146_SNAPC5_NM_-|	45.71	-	-
chr15:66786331-66786899:mpeak_426|chr15_66783055_66790146_SNAPC5_NM_-	-	SNAPC5	HP-Cyto_UT_Positive_IPA25pc_noCutoffOfP	chr15	66786788	66786899	chr15:66786788-66786899:mpeak_30049|chr15_66783055_66790146_SNAPC5_NM_-|	10.77	-	-
chr15:75713429-75713497:mpeak_429|chr15_75664550_75748124_SIN3A_NM_-	-	SIN3A	HP-Cyto_6h_Positive_IPA25pc_noCutoffOfP	chr15	75713430	75713494	chr15:75713430-75713494:mpeak_28216|chr15_75664550_75748124_SIN3A_NM_-|	19.51	-	uc002bai.3:75664319:75722716:-;uc002baj.3:75664319:75722716:-;uc010uml.2:75664319:75722716:-
chr15:75805033-75805102:mpeak_431|chr15_75761324_75871632_PTPN9_NM_-	-	PTPN9	HP-Cyto_6h_Positive_IPA25pc_noCutoffOfP	chr15	75805033	75805102	chr15:75805033-75805102:mpeak_28228|chr15_75761324_75871632_PTPN9_NM_-|	21.44	-	uc002bal.3:75761109:75871117:-
chr15:76995226-76995358:mpeak_432|chr15_76641077_77176217_SCAPER_NM_-	-	SCAPER	HP-Cyto_18h_Positive_IPA25pc_noCutoffOfP	chr15	76995226	76995358	chr15:76995226-76995358:mpeak_27427|chr15_76641077_77176217_SCAPER_NM_-|	17.32	-	uc010bkr.3:76640973:77021024:-;uc002bbx.3:76640973:77085607:-;uc002bby.3:76640973:77176158:-;uc002bbz.1:76673688:77096962:-;uc002bca.1:76957995:77096962:-;uc002bcb.1:76995190:77176158:-
chr15:82431053-82431191:mpeak_434|chr15_82422902_82555104_EFTUD1_NM_-	-	EFTUD1	HP-Cyto_UT_Positive_IPA25pc_noCutoffOfP	chr15	82431053	82431192	chr15:82431053-82431192:mpeak_30678|chr15_82422902_82555104_EFTUD1_NM_-|	26.46	-	uc002bgt.1:82422713:82554119:-;uc002bgu.1:82422713:82554119:-
chr16:14294437-14294581:mpeak_465|chr16_14165169_14354765_MKL2_NM_+	+	MKL2	HP-Cyto_6h_Positive_IPA25pc_noCutoffOfP	chr16	14294437	14294581	chr16:14294437-14294581:mpeak_29773|chr16_14165169_14354765_MKL2_NM_+|	13.04	+	uc010uzb.2:14294344:14334682:+;uc002dch.3:14280771:14334405:+;uc002dcg.3:14234463:14355301:+;uc010uza.2:14234463:14355301:+
chr16:22087324-22087485:mpeak_471|chr16_22019455_22092016_C16orf52_NM_+	+	C16orf52	HP-Cyto_6h_Positive_IPA25pc_noCutoffOfP	chr16	22087324	22087398	chr16:22087324-22087398:mpeak_30131|chr16_22019455_22092016_C16orf52_NM_+|	17.45	+	uc002dkd.2:22019622:22092201:+
chr16:3336829-3336894:mpeak_451|chr16_3333486_3339392_ZNF263_NM_+	+	ZNF263	HP-Cyto_6h_Positive_IPA25pc_noCutoffOfP	chr16	3336829	3336886	chr16:3336829-3336886:mpeak_29363|chr16_3333486_3339392_ZNF263_NM_+|	24.32	+	uc002cuq.3:3333818:3340558:+
chr16:493989-494048:mpeak_446|chr16_475667_570725_RAB11FIP3_NM_+	+	RAB11FIP3	HP-Cyto_6h_Positive_IPA25pc_noCutoffOfP	chr16	493991	494042	chr16:493991-494042:mpeak_29044|chr16_475667_570725_RAB11FIP3_NM_+|	5.31	+	uc002chf.3:476006:570839:+
chr16:547394-547458:mpeak_447|chr16_475667_570725_RAB11FIP3_NM_+	+	RAB11FIP3	HP-Cyto_UT_Positive_IPA25pc_noCutoffOfP	chr16	547395	547452	chr16:547395-547452:mpeak_31347|chr16_475667_570725_RAB11FIP3_NM_+|	18.14	+	uc010uuf.2:525030:570839:+;uc010uug.2:532551:570839:+;uc002chf.3:476006:570839:+
chr16:85105384-85105447:mpeak_494|chr16_85061356_85121881_KIAA0513_NM_+	+	KIAA0513	HP-Cyto_18h_Positive_IPA25pc_noCutoffOfP	chr16	85105384	85105441	chr16:85105384-85105441:mpeak_30989|chr16_85061356_85121881_KIAA0513_NM_+|	4.59	+	uc002fit.3:85100677:85112613:+;uc010voj.2:85100677:85121931:+;uc002fiu.3:85100677:85121931:+
chr16:87986047-87986372:mpeak_496|chr16_87985037_88110195_BANP_NM_+	+	BANP	HP-Cyto_6h_Positive_IPA25pc_noCutoffOfP	chr16	87986050	87986166	chr16:87986050-87986166:mpeak_32216|chr16_87985037_88110195_BANP_NM_+|	32.87	+	-
chr1:6885147-6885239:mpeak_5|chr1_6845383_7826518_CAMTA1_NM_+	+	CAMTA1	HP-Cyto_6h_Positive_IPA25pc_noCutoffOfP	chr1	6885147	6885239	chr1:6885147-6885239:mpeak_305|chr1_6845383_6947713_CAMTA1_NR_+mpeak_305|chr1_6845383_7826518_CAMTA1_NM_+||	10.45	+	uc001aoh.3:6845590:6931825:+;uc021ofq.1:6845590:6947785:+;uc001aoi.3:6845590:7826551:+
chr1:6885147-6885239:mpeak_5|chr1_6845383_7826518_CAMTA1_NM_+	+	CAMTA1	HP-Cyto_UT_Positive_IPA25pc_noCutoffOfP	chr1	6885147	6885239	chr1:6885147-6885239:mpeak_330|chr1_6845383_6947713_CAMTA1_NR_+mpeak_330|chr1_6845383_7826518_CAMTA1_NM_+||	13.87	+	uc001aoh.3:6845590:6931825:+;uc021ofq.1:6845590:6947785:+;uc001aoi.3:6845590:7826551:+
chr16:89356454-89356535:mpeak_500|chr16_89353521_89556969_ANKRD11_NR_-	-	ANKRD11	HP-Cyto_6h_Positive_IPA25pc_noCutoffOfP	chr16	89356456	89356525	chr16:89356456-89356525:mpeak_32334|chr16_89353521_89556969_ANKRD11_NR_-mpeak_32334|chr16_89335071_89556969_ANKRD11_NM_-||	14.06	-	uc002fnb.1:89345479:89358185:-;uc002fnd.3:89354875:89371640:-;uc002fmy.2:89334885:89383427:-;uc002fmx.2:89334885:89383427:-;uc002fnc.2:89334885:89383427:-;uc002fne.4:89353512:89371640:-
chr16:89358093-89358155:mpeak_501|chr16_89335071_89556969_ANKRD11_NM_-	-	ANKRD11	HP-Cyto_6h_Positive_IPA25pc_noCutoffOfP	chr16	89358093	89358155	chr16:89358093-89358155:mpeak_32336|chr16_89353521_89556969_ANKRD11_NR_-mpeak_32336|chr16_89335071_89556969_ANKRD11_NM_-||	16.03	-	uc002fnb.1:89345479:89358185:-;uc002fnd.3:89354875:89371640:-;uc002fmy.2:89334885:89383427:-;uc002fmx.2:89334885:89383427:-;uc002fnc.2:89334885:89383427:-;uc002fne.4:89353512:89371640:-
chr16:89493013-89493092:mpeak_506|chr16_89353521_89556969_ANKRD11_NR_-	-	ANKRD11	HP-Cyto_6h_Positive_IPA25pc_noCutoffOfP	chr16	89493011	89493082	chr16:89493011-89493082:mpeak_32353|chr16_89353521_89556969_ANKRD11_NR_-mpeak_32353|chr16_89335071_89556969_ANKRD11_NM_-||	11.35	-	-
chr16:89493013-89493092:mpeak_506|chr16_89353521_89556969_ANKRD11_NR_-	-	ANKRD11	HP-Cyto_6h_Positive_IPA25pc_noCutoffOfP	chr16	89493183	89493233	chr16:89493183-89493233:mpeak_32354|chr16_89353521_89556969_ANKRD11_NR_-mpeak_32354|chr16_89335071_89556969_ANKRD11_NM_-||	10.46	-	-
chr16:90025619-90025797:mpeak_512|chr16_90015138_90032268_DEF8_NM_+	+	DEF8	HP-Cyto_6h_Positive_IPA25pc_noCutoffOfP	chr16	90025717	90025793	chr16:90025717-90025793:mpeak_32439|chr16_90015138_90032268_DEF8_NM_+|	133.69	+	uc002fpn.2:90015873:90032371:+;uc002fpo.2:90020660:90032371:+;uc002fpp.2:90020660:90032371:+;uc021tmv.1:90020660:90032371:+;uc010vpq.2:90021632:90032371:+;uc010vpr.2:90020660:90032371:+
chr16:90051008-90051118:mpeak_513|chr16_90038987_90066856_AFG3L1P_NR_+	+	AFG3L1P	HP-Cyto_UT_Positive_IPA25pc_noCutoffOfP	chr16	90051008	90051117	chr16:90051008-90051117:mpeak_35122|chr16_90038987_90066856_AFG3L1P_NR_+|	18.11	+	-
chr16:9199065-9199171:mpeak_455|chr16_9185536_9210524_C16orf72_NM_+	+	C16orf72	HP-Cyto_6h_Positive_IPA25pc_noCutoffOfP	chr16	9199065	9199171	chr16:9199065-9199171:mpeak_29591|chr16_9185536_9210524_C16orf72_NM_+|	38.72	+	uc002czm.3:9185901:9210769:+
chr16:9199305-9199362:mpeak_456|chr16_9185536_9210524_C16orf72_NM_+	+	C16orf72	HP-Cyto_6h_Positive_IPA25pc_noCutoffOfP	chr16	9199065	9199171	chr16:9199065-9199171:mpeak_29591|chr16_9185536_9210524_C16orf72_NM_+|	38.72	+	uc002czm.3:9185901:9210769:+
chr16:9205693-9205833:mpeak_460|chr16_9185536_9210524_C16orf72_NM_+	+	C16orf72	HP-Cyto_18h_Positive_IPA25pc_noCutoffOfP	chr16	9205860	9205996	chr16:9205860-9205996:mpeak_28717|chr16_9185536_9210524_C16orf72_NM_+|	161.01	+	uc002czm.3:9185901:9210769:+
chr16:9205693-9205833:mpeak_460|chr16_9185536_9210524_C16orf72_NM_+	+	C16orf72	HP-Cyto_6h_Positive_IPA25pc_noCutoffOfP	chr16	9205699	9205833	chr16:9205699-9205833:mpeak_29597|chr16_9185536_9210524_C16orf72_NM_+|	45.15	+	uc002czm.3:9185901:9210769:+
chr16:9205693-9205833:mpeak_460|chr16_9185536_9210524_C16orf72_NM_+	+	C16orf72	HP-Cyto_6h_Positive_IPA25pc_noCutoffOfP	chr16	9205860	9205996	chr16:9205860-9205996:mpeak_29598|chr16_9185536_9210524_C16orf72_NM_+|	91.17	+	uc002czm.3:9185901:9210769:+
chr16:9205860-9205996:mpeak_461|chr16_9185536_9210524_C16orf72_NM_+	+	C16orf72	HP-Cyto_18h_Positive_IPA25pc_noCutoffOfP	chr16	9205860	9205996	chr16:9205860-9205996:mpeak_28717|chr16_9185536_9210524_C16orf72_NM_+|	161.01	+	uc002czm.3:9185901:9210769:+
chr16:9205860-9205996:mpeak_461|chr16_9185536_9210524_C16orf72_NM_+	+	C16orf72	HP-Cyto_6h_Positive_IPA25pc_noCutoffOfP	chr16	9205699	9205833	chr16:9205699-9205833:mpeak_29597|chr16_9185536_9210524_C16orf72_NM_+|	45.15	+	uc002czm.3:9185901:9210769:+
chr16:9205860-9205996:mpeak_461|chr16_9185536_9210524_C16orf72_NM_+	+	C16orf72	HP-Cyto_6h_Positive_IPA25pc_noCutoffOfP	chr16	9205860	9205996	chr16:9205860-9205996:mpeak_29598|chr16_9185536_9210524_C16orf72_NM_+|	91.17	+	uc002czm.3:9185901:9210769:+
chr1:6931851-6932115:mpeak_6|chr1_6845383_7826518_CAMTA1_NM_+	+	CAMTA1	HP-Cyto_6h_Positive_IPA25pc_noCutoffOfP	chr1	6931967	6932115	chr1:6931967-6932115:mpeak_306|chr1_6845383_6947713_CAMTA1_NR_+mpeak_306|chr1_6845383_7826518_CAMTA1_NM_+||	68.76	+	uc021ofq.1:6845590:6947785:+;uc001aoi.3:6845590:7826551:+
chr1:6931851-6932115:mpeak_6|chr1_6845383_7826518_CAMTA1_NM_+	+	CAMTA1	HP-Cyto_UT_Positive_IPA25pc_noCutoffOfP	chr1	6931967	6932115	chr1:6931967-6932115:mpeak_332|chr1_6845383_6947713_CAMTA1_NR_+mpeak_332|chr1_6845383_7826518_CAMTA1_NM_+||	62.33	+	uc021ofq.1:6845590:6947785:+;uc001aoi.3:6845590:7826551:+
chr17:11892067-11892120:mpeak_529|chr17_11882061_11900827_ZNF18_NM_-	-	ZNF18	HP-Cyto_UT_Positive_IPA25pc_noCutoffOfP	chr17	11892063	11892119	chr17:11892063-11892119:mpeak_35997|chr17_11882061_11900827_ZNF18_NM_-|	23.9	-	uc002gng.1:11881273:11896146:-;uc002gnh.1:11881273:11896146:-;uc002gni.1:11881273:11896146:-
chr17:17207400-17207505:mpeak_533|chr17_17206679_17250118_NT5M_NM_+	+	NT5M	HP-Cyto_18h_Positive_IPA25pc_noCutoffOfP	chr17	17207336	17207505	chr17:17207336-17207505:mpeak_32229|chr17_17206679_17250118_NT5M_NM_+|	9.41	+	uc002grf.3:17206864:17250261:+;uc002grg.3:17206864:17250261:+
chr17:17207400-17207505:mpeak_533|chr17_17206679_17250118_NT5M_NM_+	+	NT5M	HP-Cyto_6h_Positive_IPA25pc_noCutoffOfP	chr17	17207360	17207505	chr17:17207360-17207505:mpeak_33430|chr17_17206679_17250118_NT5M_NM_+|	15.72	+	uc002grf.3:17206864:17250261:+;uc002grg.3:17206864:17250261:+
chr17:1726246-1726326:mpeak_519|chr17_1684733_1733175_SMYD4_NM_-	-	SMYD4	HP-Cyto_6h_Positive_IPA25pc_noCutoffOfP	chr17	1726246	1726326	chr17:1726246-1726326:mpeak_32622|chr17_1684733_1733175_SMYD4_NM_-|	25.09	-	uc002ftm.4:1684579:1731288:-
chr17:17588310-17588371:mpeak_535|chr17_17584786_17713283_RAI1_NM_+	+	RAI1	HP-Cyto_6h_Positive_IPA25pc_noCutoffOfP	chr17	17588310	17588363	chr17:17588310-17588363:mpeak_33444|chr17_17584786_17713283_RAI1_NM_+|	29.93	+	-
chr17:17657932-17658095:mpeak_536|chr17_17584786_17713283_RAI1_NM_+	+	RAI1	HP-Cyto_6h_Positive_IPA25pc_noCutoffOfP	chr17	17657932	17657994	chr17:17657932-17657994:mpeak_33447|chr17_17584786_17713283_RAI1_NM_+|	26.8	+	-
chr17:29674189-29674250:mpeak_545|chr17_29421944_29701030_NF1_NM_+	+	NF1	HP-Cyto_6h_Positive_IPA25pc_noCutoffOfP	chr17	29674189	29674251	chr17:29674189-29674251:mpeak_34024|chr17_29421944_29701030_NF1_NM_+|	14	+	uc010cso.3:29654684:29701173:+;uc002hgg.3:29422327:29701173:+;uc002hgh.3:29422327:29701173:+
chr17:48777924-48778071:mpeak_558|chr17_48773504_48785270_ANKRD40_NM_-	-	ANKRD40	HP-Cyto_6h_Positive_IPA25pc_noCutoffOfP	chr17	48777926	48778055	chr17:48777926-48778055:mpeak_35176|chr17_48773504_48785270_ANKRD40_NM_-|	34.18	-	uc002iso.3:48773357:48785015:-
chr17:62808010-62808079:mpeak_576|chr17_62781485_62833302_PLEKHM1P_NR_-	-	PLEKHM1P	HP-Cyto_UT_Positive_IPA25pc_noCutoffOfP	chr17	62808010	62808079	chr17:62808010-62808079:mpeak_39087|chr17_62781485_62833302_PLEKHM1P_NR_-|	6.13	-	-
chr17:80530501-80530568:mpeak_591|chr17_80477593_80559178_FOXK2_NM_+	+	FOXK2	HP-Cyto_6h_Positive_IPA25pc_noCutoffOfP	chr17	80530493	80530566	chr17:80530493-80530566:mpeak_36986|chr17_80477593_80559178_FOXK2_NM_+|	57.67	+	uc002kfm.1:80477764:80553716:+;uc002kfn.3:80477764:80559375:+;uc010diu.3:80477764:80559280:+
chr18:13543476-13543627:mpeak_598|chr18_13218728_13645125_LDLRAD4_NM_+	+	LDLRAD4	HP-Cyto_6h_Positive_IPA25pc_noCutoffOfP	chr18	13543533	13543627	chr18:13543533-13543627:mpeak_37355|chr18_13218728_13645125_LDLRAD4_NM_+|	40.63	+	uc002ksb.3:13387721:13645656:+;uc031rhm.1:13387721:13645656:+;uc031rhn.1:13387721:13645656:+
chr18:13543476-13543627:mpeak_598|chr18_13218728_13645125_LDLRAD4_NM_+	+	LDLRAD4	HP-Cyto_UT_Positive_IPA25pc_noCutoffOfP	chr18	13543476	13543633	chr18:13543476-13543633:mpeak_40449|chr18_13218728_13645125_LDLRAD4_NM_+|	44.32	+	uc002ksb.3:13387721:13645656:+;uc031rhm.1:13387721:13645656:+;uc031rhn.1:13387721:13645656:+
chr18:14120128-14120186:mpeak_599|chr18_14106408_14132489_ZNF519_NM_-	-	ZNF519	HP-Cyto_6h_Positive_IPA25pc_noCutoffOfP	chr18	14120129	14120179	chr18:14120129-14120179:mpeak_37377|chr18_14077525_14132489_ZNF519_NR_-mpeak_37377|chr18_14106408_14132489_ZNF519_NM_-||	2.66	-	uc002kst.2:14104915:14132276:-
chr18:14120128-14120186:mpeak_599|chr18_14106408_14132489_ZNF519_NM_-	-	ZNF519	HP-Cyto_UT_Positive_IPA25pc_noCutoffOfP	chr18	14120128	14120186	chr18:14120128-14120186:mpeak_40485|chr18_14077525_14132489_ZNF519_NR_-mpeak_40485|chr18_14106408_14132489_ZNF519_NM_-||	3.43	-	uc002kst.2:14104915:14132276:-
chr1:82190194-82190288:mpeak_33|chr1_82165454_82456074_ADGRL2_NM_+	+	ADGRL2	HP-Cyto_6h_Positive_IPA25pc_noCutoffOfP	chr1	82190211	82190295	chr1:82190211-82190295:mpeak_2978|chr1_82165454_82456074_ADGRL2_NM_+|	8.01	+	-
chr1:82190194-82190288:mpeak_33|chr1_82165454_82456074_ADGRL2_NM_+	+	ADGRL2	HP-Cyto_UT_Positive_IPA25pc_noCutoffOfP	chr1	82190194	82190288	chr1:82190194-82190288:mpeak_3155|chr1_82165454_82456074_ADGRL2_NM_+|	8.87	+	-
chr18:2582794-2582866:mpeak_594|chr18_2571509_2616435_NDC80_NM_+	+	NDC80	HP-Cyto_UT_Positive_IPA25pc_noCutoffOfP	chr18	2582794	2582866	chr18:2582794-2582866:mpeak_40172|chr18_2571509_2616435_NDC80_NM_+|	22.08	+	uc002kli.3:2572984:2616573:+
chr18:29991839-29991894:mpeak_601|chr18_29848731_30050447_GAREM_NM_-	-	GAREM	HP-Cyto_6h_Positive_IPA25pc_noCutoffOfP	chr18	29991839	29991988	chr18:29991839-29991988:mpeak_37674|chr18_29848731_30050447_GAREM_NM_-|	29.53	-	uc002kxl.3:29847833:30050391:-;uc002kxk.2:29847833:30050391:-
chr18:29991839-29991894:mpeak_601|chr18_29848731_30050447_GAREM_NM_-	-	GAREM	HP-Cyto_UT_Positive_IPA25pc_noCutoffOfP	chr18	29991839	29991894	chr18:29991839-29991894:mpeak_40785|chr18_29848731_30050447_GAREM_NM_-|	38.62	-	uc002kxl.3:29847833:30050391:-;uc002kxk.2:29847833:30050391:-
chr18:29992172-29992239:mpeak_602|chr18_29848731_30050447_GAREM_NM_-	-	GAREM	HP-Cyto_6h_Positive_IPA25pc_noCutoffOfP	chr18	29992172	29992240	chr18:29992172-29992240:mpeak_37675|chr18_29848731_30050447_GAREM_NM_-|	33.54	-	uc002kxl.3:29847833:30050391:-;uc002kxk.2:29847833:30050391:-
chr18:29992172-29992239:mpeak_602|chr18_29848731_30050447_GAREM_NM_-	-	GAREM	HP-Cyto_UT_Positive_IPA25pc_noCutoffOfP	chr18	29992172	29992239	chr18:29992172-29992239:mpeak_40786|chr18_29848731_30050447_GAREM_NM_-|	41.49	-	uc002kxl.3:29847833:30050391:-;uc002kxk.2:29847833:30050391:-
chr18:29992708-29992977:mpeak_603|chr18_29848731_30050447_GAREM_NM_-	-	GAREM	HP-Cyto_6h_Positive_IPA25pc_noCutoffOfP	chr18	29992607	29993044	chr18:29992607-29993044:mpeak_37676|chr18_29848731_30050447_GAREM_NM_-|	130.25	-	uc002kxl.3:29847833:30050391:-;uc002kxk.2:29847833:30050391:-
chr18:29992708-29992977:mpeak_603|chr18_29848731_30050447_GAREM_NM_-	-	GAREM	HP-Cyto_UT_Positive_IPA25pc_noCutoffOfP	chr18	29992708	29992981	chr18:29992708-29992981:mpeak_40787|chr18_29848731_30050447_GAREM_NM_-|	118.09	-	uc002kxl.3:29847833:30050391:-;uc002kxk.2:29847833:30050391:-
chr18:45379619-45379825:mpeak_606|chr18_45368321_45457517_SMAD2_NM_-	-	SMAD2	HP-Cyto_6h_Positive_IPA25pc_noCutoffOfP	chr18	45379618	45379823	chr18:45379618-45379823:mpeak_37910|chr18_45368321_45457517_SMAD2_NM_-|	113.83	-	uc002lcy.4:45368197:45423127:-;uc002lcz.4:45368197:45423127:-;uc010xdc.3:45368197:45423127:-;uc010xdd.2:45371604:45423127:-
chr1:84552567-84552663:mpeak_34|chr1_84543657_84700862_PRKACB_NM_+	+	PRKACB	HP-Cyto_UT_Positive_IPA25pc_noCutoffOfP	chr1	84552567	84552663	chr1:84552567-84552663:mpeak_3169|chr1_84543657_84700862_PRKACB_NM_+|	23.81	+	uc001dji.3:84544008:84670173:+;uc001djj.3:84544008:84700988:+
chr18:55712643-55712733:mpeak_608|chr18_55711609_56063398_NEDD4L_NM_+	+	NEDD4L	HP-Cyto_6h_Positive_IPA25pc_noCutoffOfP	chr18	55712646	55712829	chr18:55712646-55712829:mpeak_38099|chr18_55711609_56063398_NEDD4L_NM_+|	31.82	+	uc002lgy.3:55711892:56063501:+;uc002lgz.3:55711892:56063501:+;uc002lgx.3:55711892:56063501:+
chr1:85639947-85640048:mpeak_36|chr1_85624932_85666728_SYDE2_NM_-	-	SYDE2	HP-Cyto_UT_Positive_IPA25pc_noCutoffOfP	chr1	85639947	85640048	chr1:85639947-85640048:mpeak_3209|chr1_85624932_85666728_SYDE2_NM_-|	26.69	-	uc009wcm.3:85624432:85666679:-
chr1:85642747-85643079:mpeak_37|chr1_85624932_85666728_SYDE2_NM_-	-	SYDE2	HP-Cyto_UT_Positive_IPA25pc_noCutoffOfP	chr1	85642759	85642982	chr1:85642759-85642982:mpeak_3210|chr1_85624932_85666728_SYDE2_NM_-|	19.37	-	uc009wcm.3:85624432:85666679:-
chr1:85642747-85643079:mpeak_37|chr1_85624932_85666728_SYDE2_NM_-	-	SYDE2	HP-Cyto_UT_Positive_IPA25pc_noCutoffOfP	chr1	85643128	85643474	chr1:85643128-85643474:mpeak_3211|chr1_85624932_85666728_SYDE2_NM_-|	28.87	-	uc009wcm.3:85624432:85666679:-
chr1:85643128-85643500:mpeak_38|chr1_85624932_85666728_SYDE2_NM_-	-	SYDE2	HP-Cyto_UT_Positive_IPA25pc_noCutoffOfP	chr1	85642759	85642982	chr1:85642759-85642982:mpeak_3210|chr1_85624932_85666728_SYDE2_NM_-|	19.37	-	uc009wcm.3:85624432:85666679:-
chr1:85643128-85643500:mpeak_38|chr1_85624932_85666728_SYDE2_NM_-	-	SYDE2	HP-Cyto_UT_Positive_IPA25pc_noCutoffOfP	chr1	85643128	85643474	chr1:85643128-85643474:mpeak_3211|chr1_85624932_85666728_SYDE2_NM_-|	28.87	-	uc009wcm.3:85624432:85666679:-
chr1:87564057-87564130:mpeak_41|chr1_87380334_87570152_HS2ST1_NM_+	+	HS2ST1	HP-Cyto_18h_Positive_IPA25pc_noCutoffOfP	chr1	87564057	87564130	chr1:87564057-87564130:mpeak_3330|chr1_87380334_87570152_HS2ST1_NM_+|	53.7	+	uc010osk.2:87380719:87570379:+;uc001dme.2:87458803:87633859:+
chr18:77960406-77960566:mpeak_611|chr18_77918489_78005397_PARD6G_NM_-	-	PARD6G	HP-Cyto_6h_Positive_IPA25pc_noCutoffOfP	chr18	77960403	77960574	chr18:77960403-77960574:mpeak_38339|chr18_77918489_78005397_PARD6G_NM_-|	16.03	-	uc002lny.3:77917653:78005231:-;uc010xfp.2:77941004:78005231:-
chr18:77960406-77960566:mpeak_611|chr18_77918489_78005397_PARD6G_NM_-	-	PARD6G	HP-Cyto_UT_Positive_IPA25pc_noCutoffOfP	chr18	77960406	77960566	chr18:77960406-77960566:mpeak_41511|chr18_77918489_78005397_PARD6G_NM_-|	17.32	-	uc002lny.3:77917653:78005231:-;uc010xfp.2:77941004:78005231:-
chr1:89273416-89273469:mpeak_43|chr1_89149921_89298927_PKN2_NM_+	+	PKN2	HP-Cyto_6h_Positive_IPA25pc_noCutoffOfP	chr1	89273362	89273469	chr1:89273362-89273469:mpeak_3115|chr1_89149921_89298927_PKN2_NM_+|	26.83	+	uc001dmn.3:89150263:89299131:+;uc010osp.2:89150263:89299131:+;uc010osq.2:89226026:89299131:+;uc009wcv.3:89150263:89299131:+;uc010osr.2:89250341:89299131:+
chr19:11308150-11308207:mpeak_622|chr19_11277287_11308243_KANK2_NM_-	-	KANK2	HP-Cyto_18h_Positive_IPA25pc_noCutoffOfP	chr19	11308134	11308207	chr19:11308134-11308207:mpeak_37792|chr19_11277287_11308243_KANK2_NM_-|	31.6	-	-
chr19:11308150-11308207:mpeak_622|chr19_11277287_11308243_KANK2_NM_-	-	KANK2	HP-Cyto_6h_Positive_IPA25pc_noCutoffOfP	chr19	11308134	11308213	chr19:11308134-11308213:mpeak_39160|chr19_11277287_11308243_KANK2_NM_-|	127.61	-	-
chr19:12721252-12721343:mpeak_624|chr19_12692538_12721623_ZNF490_NM_-	-	ZNF490	HP-Cyto_UT_Positive_IPA25pc_noCutoffOfP	chr19	12721257	12721320	chr19:12721257-12721320:mpeak_42514|chr19_12692538_12721623_ZNF490_NM_-|	12.05	-	uc002mtz.2:12691298:12721494:-
chr1:91485988-91486043:mpeak_46|chr1_91382547_91487812_ZNF644_NM_-	-	ZNF644	HP-Cyto_6h_Positive_IPA25pc_noCutoffOfP	chr1	91485986	91486043	chr1:91485986-91486043:mpeak_3188|chr1_91382547_91487812_ZNF644_NM_-|	4.09	-	-
chr1:91485988-91486043:mpeak_46|chr1_91382547_91487812_ZNF644_NM_-	-	ZNF644	HP-Cyto_UT_Positive_IPA25pc_noCutoffOfP	chr1	91485981	91486043	chr1:91485981-91486043:mpeak_3382|chr1_91382547_91487812_ZNF644_NM_-|	15.59	-	-
chr1:91486445-91486553:mpeak_47|chr1_91382547_91487812_ZNF644_NM_-	-	ZNF644	HP-Cyto_UT_Positive_IPA25pc_noCutoffOfP	chr1	91486404	91486553	chr1:91486404-91486553:mpeak_3383|chr1_91382547_91487812_ZNF644_NM_-|	15.25	-	-
chr19:20043669-20043752:mpeak_636|chr19_20011721_20043990_ZNF93_NM_+	+	ZNF93	HP-Cyto_UT_Positive_IPA25pc_noCutoffOfP	chr19	20043669	20043749	chr19:20043669-20043749:mpeak_43094|chr19_20011721_20043990_ZNF93_NM_+|	13.68	+	uc002non.3:20011897:20045627:+
chr19:20299809-20299873:mpeak_637|chr19_20278022_20307772_ZNF486_NM_+	+	ZNF486	HP-Cyto_UT_Positive_IPA25pc_noCutoffOfP	chr19	20299809	20299873	chr19:20299809-20299873:mpeak_43105|chr19_20278022_20307772_ZNF486_NM_+|	7.97	+	uc002nou.3:20278139:20308911:+
chr19:21274505-21274580:mpeak_639|chr19_21264952_21299612_ZNF714_NM_+	+	ZNF714	HP-Cyto_18h_Positive_IPA25pc_noCutoffOfP	chr19	21274505	21274568	chr19:21274505-21274568:mpeak_38425|chr19_21264952_21307763_ZNF714_NR_+mpeak_38425|chr19_21264952_21299612_ZNF714_NM_+||	34.87	+	-
chr19:21336388-21336463:mpeak_640|chr19_21324839_21365425_ZNF431_NM_+	+	ZNF431	HP-Cyto_UT_Positive_IPA25pc_noCutoffOfP	chr19	21336389	21336463	chr19:21336389-21336463:mpeak_43158|chr19_21324839_21365425_ZNF431_NM_+|	4.28	+	uc002npp.2:21324986:21366837:+;uc010ecr.2:21324986:21366837:+
chr19:21690410-21690475:mpeak_641|chr19_21688436_21719081_ZNF429_NM_+	+	ZNF429	HP-Cyto_UT_Positive_IPA25pc_noCutoffOfP	chr19	21690410	21690475	chr19:21690410-21690475:mpeak_43189|chr19_21688436_21719081_ZNF429_NM_+|	5.21	+	uc002nqd.1:21688573:21720880:+;uc010ecu.2:21688573:21736738:+
chr19:21702473-21702531:mpeak_642|chr19_21688436_21719081_ZNF429_NM_+	+	ZNF429	HP-Cyto_UT_Positive_IPA25pc_noCutoffOfP	chr19	21702473	21702531	chr19:21702473-21702531:mpeak_43191|chr19_21688436_21719081_ZNF429_NM_+|	15.09	+	uc002nqd.1:21688573:21720880:+;uc010ecu.2:21688573:21736738:+
chr19:21934899-21934963:mpeak_643|chr19_21910791_21950430_ZNF100_NM_-	-	ZNF100	HP-Cyto_18h_Positive_IPA25pc_noCutoffOfP	chr19	21934903	21934963	chr19:21934903-21934963:mpeak_38481|chr19_21910791_21950430_ZNF100_NM_-|	2.72	-	uc002nqi.3:21909484:21950231:-
chr19:22021724-22021782:mpeak_644|chr19_21992609_22034870_ZNF43_NM_-	-	ZNF43	HP-Cyto_UT_Positive_IPA25pc_noCutoffOfP	chr19	22021724	22021784	chr19:22021724-22021784:mpeak_43219|chr19_21992609_22034870_ZNF43_NM_-|	11.88	-	uc031rka.1:21990408:22034736:-
chr19:22260485-22260545:mpeak_645|chr19_22235265_22270778_ZNF257_NM_+	+	ZNF257	HP-Cyto_UT_Positive_IPA25pc_noCutoffOfP	chr19	22260486	22260545	chr19:22260486-22260545:mpeak_43225|chr19_22235265_22270778_ZNF257_NM_+|	13.41	+	uc010ecx.3:22235434:22272244:+;uc010ecy.3:22255703:22272244:+
chr19:24112032-24112092:mpeak_651|chr19_24097683_24115144_ZNF726_NM_+	+	ZNF726	HP-Cyto_UT_Positive_IPA25pc_noCutoffOfP	chr19	24112032	24112149	chr19:24112032-24112149:mpeak_43313|chr19_24097683_24115144_ZNF726_NM_+|	19.52	+	uc021urw.1:24097796:24116769:+
chr19:24239071-24239139:mpeak_653|chr19_24216206_24309055_ZNF254_NM_+	+	ZNF254	HP-Cyto_UT_Positive_IPA25pc_noCutoffOfP	chr19	24239071	24239139	chr19:24239071-24239139:mpeak_43327|chr19_24216206_24309055_ZNF254_NM_+|	7.02	+	-
chr19:24248418-24248485:mpeak_654|chr19_24216206_24309055_ZNF254_NM_+	+	ZNF254	HP-Cyto_UT_Positive_IPA25pc_noCutoffOfP	chr19	24248579	24248648	chr19:24248579-24248648:mpeak_43334|chr19_24216206_24309055_ZNF254_NM_+|	6.67	+	-
chr19:24248579-24248648:mpeak_655|chr19_24216206_24309055_ZNF254_NM_+	+	ZNF254	HP-Cyto_UT_Positive_IPA25pc_noCutoffOfP	chr19	24248579	24248648	chr19:24248579-24248648:mpeak_43334|chr19_24216206_24309055_ZNF254_NM_+|	6.67	+	-
chr19:33462314-33462424:mpeak_656|chr19_33370284_33462935_CEP89_NM_-	-	CEP89	HP-Cyto_18h_Positive_IPA25pc_noCutoffOfP	chr19	33462368	33462424	chr19:33462368-33462424:mpeak_38666|chr19_33370284_33462935_CEP89_NM_-|	3.15	-	uc002nty.3:33370067:33462780:-;uc002nua.3:33422292:33462780:-
chr19:33462314-33462424:mpeak_656|chr19_33370284_33462935_CEP89_NM_-	-	CEP89	HP-Cyto_6h_Positive_IPA25pc_noCutoffOfP	chr19	33462314	33462424	chr19:33462314-33462424:mpeak_40094|chr19_33370284_33462935_CEP89_NM_-|	7.38	-	uc002nty.3:33370067:33462780:-;uc002nua.3:33422292:33462780:-
chr19:337217-337319:mpeak_612|chr19_306711_344791_MIER2_NM_-	-	MIER2	HP-Cyto_18h_Positive_IPA25pc_noCutoffOfP	chr19	337234	337296	chr19:337234-337296:mpeak_37017|chr19_306711_344791_MIER2_NM_-|	5	-	uc002lok.1:306689:344782:-
chr19:338300-338379:mpeak_613|chr19_306711_344791_MIER2_NM_-	-	MIER2	HP-Cyto_18h_Positive_IPA25pc_noCutoffOfP	chr19	338300	338359	chr19:338300-338359:mpeak_37018|chr19_306711_344791_MIER2_NM_-|	3.5	-	uc002lok.1:306689:344782:-
chr19:338300-338379:mpeak_613|chr19_306711_344791_MIER2_NM_-	-	MIER2	HP-Cyto_UT_Positive_IPA25pc_noCutoffOfP	chr19	338304	338358	chr19:338304-338358:mpeak_41522|chr19_306711_344791_MIER2_NM_-|	37.39	-	uc002lok.1:306689:344782:-
chr19:35501473-35501572:mpeak_658|chr19_35491245_35516952_GRAMD1A_NM_+	+	GRAMD1A	HP-Cyto_6h_Positive_IPA25pc_noCutoffOfP	chr19	35501473	35501558	chr19:35501473-35501558:mpeak_40200|chr19_35491245_35516952_GRAMD1A_NM_+|	39.14	+	uc002nxi.1:35486926:35505290:+;uc010xse.1:35491382:35517045:+;uc002nxk.2:35491382:35517045:+;uc010xsf.1:35496812:35517045:+
chr19:36584227-36584289:mpeak_659|chr19_36545782_36595669_WDR62_NM_+	+	WDR62	HP-Cyto_6h_Positive_IPA25pc_noCutoffOfP	chr19	36584229	36584289	chr19:36584229-36584289:mpeak_40279|chr19_36545782_36595669_WDR62_NM_+|	22.31	+	uc002odd.2:36545873:36595930:+;uc002odc.2:36545873:36595930:+
chr19:37850619-37850907:mpeak_663|chr19_37825579_37853010_HKR1_NM_+	+	HKR1	HP-Cyto_UT_Positive_IPA25pc_noCutoffOfP	chr19	37850618	37850907	chr19:37850618-37850907:mpeak_43723|chr19_37825579_37853010_HKR1_NM_+|	16.23	+	uc002oga.3:37826126:37854677:+;uc010xto.2:37826126:37854677:+;uc002ogb.3:37835586:37854677:+;uc002ogc.3:37826126:37854677:+;uc010xtp.2:37838184:37854677:+;uc002ogd.3:37838184:37854677:+
chr19:37876492-37876549:mpeak_664|chr19_37862058_37879207_ZNF527_NM_+	+	ZNF527	HP-Cyto_UT_Positive_IPA25pc_noCutoffOfP	chr19	37876492	37876549	chr19:37876492-37876549:mpeak_43725|chr19_37862058_37879207_ZNF527_NM_+|	4.78	+	uc002ogf.3:37865100:37880781:+;uc010efk.1:37865100:37880781:+
chr19:46499548-46499602:mpeak_675|chr19_46498718_46521547_CCDC61_NM_+	+	CCDC61	HP-Cyto_UT_Positive_IPA25pc_noCutoffOfP	chr19	46499548	46499598	chr19:46499548-46499598:mpeak_44366|chr19_46498718_46521547_CCDC61_NM_+|	7.97	+	-
chr19:52485097-52485232:mpeak_681|chr19_52469467_52490079_ZNF350_NM_-	-	ZNF350	HP-Cyto_UT_Positive_IPA25pc_noCutoffOfP	chr19	52485097	52485226	chr19:52485097-52485226:mpeak_44870|chr19_52469467_52490079_ZNF350_NM_-|	10.79	-	-
chr19:53122046-53122122:mpeak_685|chr19_53118050_53193834_ZNF83_NM_-	-	ZNF83	HP-Cyto_6h_Positive_IPA25pc_noCutoffOfP	chr19	53122040	53122122	chr19:53122040-53122122:mpeak_41416|chr19_53118050_53193834_ZNF83_NM_-|	11.58	-	-
chr19:53122046-53122122:mpeak_685|chr19_53118050_53193834_ZNF83_NM_-	-	ZNF83	HP-Cyto_UT_Positive_IPA25pc_noCutoffOfP	chr19	53122042	53122102	chr19:53122042-53122102:mpeak_44982|chr19_53118050_53193834_ZNF83_NM_-|	13.36	-	-
chr19:53157684-53157744:mpeak_686|chr19_53118050_53193834_ZNF83_NM_-	-	ZNF83	HP-Cyto_UT_Positive_IPA25pc_noCutoffOfP	chr19	53157325	53157627	chr19:53157325-53157627:mpeak_44996|chr19_53118050_53193834_ZNF83_NM_-|	12.46	-	-
chr19:53982728-53982963:mpeak_689|chr19_53970988_53993628_ZNF813_NM_+	+	ZNF813	HP-Cyto_UT_Positive_IPA25pc_noCutoffOfP	chr19	53983070	53983136	chr19:53983070-53983136:mpeak_45123|chr19_53970988_53993628_ZNF813_NM_+|	7.49	+	-
chr19:53983070-53983136:mpeak_690|chr19_53970988_53993628_ZNF813_NM_+	+	ZNF813	HP-Cyto_UT_Positive_IPA25pc_noCutoffOfP	chr19	53983070	53983136	chr19:53983070-53983136:mpeak_45123|chr19_53970988_53993628_ZNF813_NM_+|	7.49	+	-
chr19:5562640-5562730:mpeak_617|chr19_5561410_5568045_TINCR_NR_-	-	TINCR	HP-Cyto_6h_Positive_IPA25pc_noCutoffOfP	chr19	5562643	5562707	chr19:5562643-5562707:mpeak_38734|chr19_5561410_5568045_TINCR_NR_-|	21.94	-	-
chr19:5562640-5562730:mpeak_617|chr19_5561410_5568045_TINCR_NR_-	-	TINCR	HP-Cyto_UT_Positive_IPA25pc_noCutoffOfP	chr19	5562643	5562707	chr19:5562643-5562707:mpeak_41948|chr19_5561410_5568045_TINCR_NR_-|	19.73	-	-
chr19:5622535-5622621:mpeak_618|chr19_5587410_5622938_SAFB2_NM_-	-	SAFB2	HP-Cyto_18h_Positive_IPA25pc_noCutoffOfP	chr19	5622535	5622598	chr19:5622535-5622598:mpeak_37395|chr19_5587410_5622938_SAFB2_NM_-|	21.78	-	uc002mcd.3:5587253:5622726:-;uc010xio.1:5612515:5622726:-
chr20:1340454-1340520:mpeak_774|chr20_1305986_1357441_SDCBP2-AS1_NR_+	+	SDCBP2-AS1	HP-Cyto_UT_Positive_IPA25pc_noCutoffOfP	chr20	1340454	1340515	chr20:1340454-1340515:mpeak_52446|chr20_1305986_1357441_SDCBP2-AS1_NR_+|	6.32	+	-
chr20:43126055-43126204:mpeak_786|chr20_43124996_43150726_SERINC3_NM_-	-	SERINC3	HP-Cyto_18h_Positive_IPA25pc_noCutoffOfP	chr20	43126055	43126340	chr20:43126055-43126340:mpeak_48073|chr20_43124996_43150726_SERINC3_NM_-|	33.19	-	-
chr20:43126055-43126204:mpeak_786|chr20_43124996_43150726_SERINC3_NM_-	-	SERINC3	HP-Cyto_UT_Positive_IPA25pc_noCutoffOfP	chr20	43126069	43126245	chr20:43126069-43126245:mpeak_53636|chr20_43124996_43150726_SERINC3_NM_-|	68.61	-	-
chr20:43127314-43128063:mpeak_787|chr20_43124996_43150726_SERINC3_NM_-	-	SERINC3	HP-Cyto_18h_Positive_IPA25pc_noCutoffOfP	chr20	43127308	43127747	chr20:43127308-43127747:mpeak_48077|chr20_43124996_43150726_SERINC3_NM_-|	79.95	-	-
chr20:43127314-43128063:mpeak_787|chr20_43124996_43150726_SERINC3_NM_-	-	SERINC3	HP-Cyto_18h_Positive_IPA25pc_noCutoffOfP	chr20	43127839	43127931	chr20:43127839-43127931:mpeak_48078|chr20_43124996_43150726_SERINC3_NM_-|	46.96	-	-
chr20:43127314-43128063:mpeak_787|chr20_43124996_43150726_SERINC3_NM_-	-	SERINC3	HP-Cyto_UT_Positive_IPA25pc_noCutoffOfP	chr20	43127256	43128310	chr20:43127256-43128310:mpeak_53639|chr20_43124996_43150726_SERINC3_NM_-|	282.28	-	-
chr20:43141475-43141639:mpeak_788|chr20_43124996_43150726_SERINC3_NM_-	-	SERINC3	HP-Cyto_18h_Positive_IPA25pc_noCutoffOfP	chr20	43141461	43141640	chr20:43141461-43141640:mpeak_48085|chr20_43124996_43150726_SERINC3_NM_-|	62.37	-	uc002xme.3:43128936:43150592:-;uc002xmf.1:43128936:43150592:-;uc010ggs.1:43128936:43142699:-;uc010zwp.1:43128936:43142555:-
chr20:43141475-43141639:mpeak_788|chr20_43124996_43150726_SERINC3_NM_-	-	SERINC3	HP-Cyto_UT_Positive_IPA25pc_noCutoffOfP	chr20	43141471	43141643	chr20:43141471-43141643:mpeak_53643|chr20_43124996_43150726_SERINC3_NM_-|	82.48	-	uc002xme.3:43128936:43150592:-;uc002xmf.1:43128936:43150592:-;uc010ggs.1:43128936:43142699:-;uc010zwp.1:43128936:43142555:-
chr2:112995883-112995986:mpeak_730|chr2_112974045_113012664_ZC3H8_NM_-	-	ZC3H8	HP-Cyto_18h_Positive_IPA25pc_noCutoffOfP	chr2	112995883	112995984	chr2:112995883-112995984:mpeak_43572|chr2_112974045_113012664_ZC3H8_NM_-|	16.13	-	uc021vmw.1:112988494:113012558:-
chr2:112995883-112995986:mpeak_730|chr2_112974045_113012664_ZC3H8_NM_-	-	ZC3H8	HP-Cyto_6h_Positive_IPA25pc_noCutoffOfP	chr2	112995883	112995976	chr2:112995883-112995976:mpeak_45028|chr2_112974045_113012664_ZC3H8_NM_-|	28.38	-	uc021vmw.1:112988494:113012558:-
chr2:112995883-112995986:mpeak_730|chr2_112974045_113012664_ZC3H8_NM_-	-	ZC3H8	HP-Cyto_UT_Positive_IPA25pc_noCutoffOfP	chr2	112995883	112995986	chr2:112995883-112995986:mpeak_48921|chr2_112974045_113012664_ZC3H8_NM_-|	39.24	-	uc021vmw.1:112988494:113012558:-
chr2:136269045-136269113:mpeak_739|chr2_135958010_136288806_ZRANB3_NM_-	-	ZRANB3	HP-Cyto_6h_Positive_IPA25pc_noCutoffOfP	chr2	136268963	136269110	chr2:136268963-136269110:mpeak_45548|chr2_135958010_136288806_ZRANB3_NM_-|	14.81	-	-
chr21:37514368-37514440:mpeak_806|chr21_37507262_37518373_CBR3_NM_+	+	CBR3	HP-Cyto_18h_Positive_IPA25pc_noCutoffOfP	chr21	37514357	37514440	chr21:37514357-37514440:mpeak_49408|chr21_37507262_37518373_CBR3_NM_+|	3.65	+	uc002yve.3:37507490:37518810:+
chr21:37514368-37514440:mpeak_806|chr21_37507262_37518373_CBR3_NM_+	+	CBR3	HP-Cyto_6h_Positive_IPA25pc_noCutoffOfP	chr21	37514366	37514440	chr21:37514366-37514440:mpeak_50847|chr21_37507262_37518373_CBR3_NM_+|	7.25	+	uc002yve.3:37507490:37518810:+
chr21:37728913-37728978:mpeak_807|chr21_37692486_37747440_MORC3_NM_+	+	MORC3	HP-Cyto_18h_Positive_IPA25pc_noCutoffOfP	chr21	37728913	37728975	chr21:37728913-37728975:mpeak_49420|chr21_37692486_37747440_MORC3_NM_+|	10.53	+	uc002yvi.3:37692562:37747594:+
chr21:40186843-40186912:mpeak_808|chr21_40177230_40194597_ETS2_NM_+	+	ETS2	HP-Cyto_18h_Positive_IPA25pc_noCutoffOfP	chr21	40186847	40186911	chr21:40186847-40186911:mpeak_49486|chr21_40177230_40194597_ETS2_NM_+|	38.49	+	uc002yxf.3:40177270:40194813:+;uc002yxg.4:40181958:40194813:+
chr21:40668349-40668464:mpeak_810|chr21_40569341_40685712_BRWD1_NM_-	-	BRWD1	HP-Cyto_6h_Positive_IPA25pc_noCutoffOfP	chr21	40668339	40668463	chr21:40668339-40668463:mpeak_50977|chr21_40569341_40685712_BRWD1_NM_-|	68.92	-	uc002yxk.2:40558951:40685417:-;uc021wjf.1:40568184:40685417:-
chr21:40668349-40668464:mpeak_810|chr21_40569341_40685712_BRWD1_NM_-	-	BRWD1	HP-Cyto_UT_Positive_IPA25pc_noCutoffOfP	chr21	40668324	40668464	chr21:40668324-40668464:mpeak_55392|chr21_40569341_40685712_BRWD1_NM_-|	191.28	-	uc002yxk.2:40558951:40685417:-;uc021wjf.1:40568184:40685417:-
chr21:40676206-40676269:mpeak_811|chr21_40569341_40685712_BRWD1_NM_-	-	BRWD1	HP-Cyto_6h_Positive_IPA25pc_noCutoffOfP	chr21	40676208	40676269	chr21:40676208-40676269:mpeak_50981|chr21_40569341_40685712_BRWD1_NM_-|	40.59	-	uc002yxm.3:40670343:40685417:-;uc002yxk.2:40558951:40685417:-;uc021wjf.1:40568184:40685417:-
chr21:43369779-43369839:mpeak_814|chr21_43309453_43373999_C2CD2_NM_-	-	C2CD2	HP-Cyto_UT_Positive_IPA25pc_noCutoffOfP	chr21	43369779	43369839	chr21:43369779-43369839:mpeak_55484|chr21_43309453_43373999_C2CD2_NM_-|	15.05	-	uc002yzw.3:43309232:43373757:-
chr2:160261355-160261429:mpeak_743|chr2_160176929_160473112_BAZ2B_NM_-	-	BAZ2B	HP-Cyto_6h_Positive_IPA25pc_noCutoffOfP	chr2	160261357	160261429	chr2:160261357-160261429:mpeak_45952|chr2_160176929_160473112_BAZ2B_NM_-|	6.46	-	uc002uar.1:160261329:160289886:-;uc002uaq.1:160255339:160310247:-;uc002uao.3:160176775:160335230:-;uc002uap.3:160176775:160335230:-
chr2:160317434-160317567:mpeak_745|chr2_160176929_160473112_BAZ2B_NM_-	-	BAZ2B	HP-Cyto_6h_Positive_IPA25pc_noCutoffOfP	chr2	160317434	160317497	chr2:160317434-160317497:mpeak_45958|chr2_160176929_160473112_BAZ2B_NM_-|	11.24	-	uc010fop.1:160294813:160335230:-;uc002uat.4:160295513:160335230:-;uc002uas.1:160289268:160335230:-;uc002uao.3:160176775:160335230:-;uc002uap.3:160176775:160335230:-;uc002uau.1:160294774:160335230:-
chr2:171906568-171906699:mpeak_747|chr2_171850466_172087824_TLK1_NM_-	-	TLK1	HP-Cyto_18h_Positive_IPA25pc_noCutoffOfP	chr2	171906568	171906699	chr2:171906568-171906699:mpeak_44854|chr2_171850466_172087824_TLK1_NM_-|	16.41	-	uc002ugr.1:171902679:171910351:-;uc010zdn.1:171850289:171923393:-;uc002ugn.2:171850289:172016938:-;uc002ugo.2:171850289:172016938:-;uc002ugp.2:171850289:171974362:-
chr2:171906568-171906699:mpeak_747|chr2_171850466_172087824_TLK1_NM_-	-	TLK1	HP-Cyto_6h_Positive_IPA25pc_noCutoffOfP	chr2	171906579	171906699	chr2:171906579-171906699:mpeak_46213|chr2_171850466_172087824_TLK1_NM_-|	27.92	-	uc002ugr.1:171902679:171910351:-;uc010zdn.1:171850289:171923393:-;uc002ugn.2:171850289:172016938:-;uc002ugo.2:171850289:172016938:-;uc002ugp.2:171850289:171974362:-
chr2:175222897-175223036:mpeak_751|chr2_175213900_175260443_CIR1_NM_-	-	CIR1	HP-Cyto_6h_Positive_IPA25pc_noCutoffOfP	chr2	175222896	175223036	chr2:175222896-175223036:mpeak_46363|chr2_175213900_175260443_CIR1_NM_-|	22.82	-	uc002uim.3:175213224:175260350:-;uc002uin.3:175213224:175243728:-
chr2:175222897-175223036:mpeak_751|chr2_175213900_175260443_CIR1_NM_-	-	CIR1	HP-Cyto_UT_Positive_IPA25pc_noCutoffOfP	chr2	175222900	175223036	chr2:175222900-175223036:mpeak_50376|chr2_175213900_175260443_CIR1_NM_-|	31.43	-	uc002uim.3:175213224:175260350:-;uc002uin.3:175213224:175243728:-
chr2:175260911-175261006:mpeak_752|chr2_175260456_175292440_SCRN3_NM_+	+	SCRN3	HP-Cyto_6h_Positive_IPA25pc_noCutoffOfP	chr2	175260952	175261023	chr2:175260952-175261023:mpeak_46364|chr2_175260456_175292440_SCRN3_NM_+|	15.99	+	uc010zen.2:175260484:175292623:+
chr2:201362516-201362573:mpeak_755|chr2_201355339_201374792_KCTD18_NM_-	-	KCTD18	HP-Cyto_UT_Positive_IPA25pc_noCutoffOfP	chr2	201362485	201362573	chr2:201362485-201362573:mpeak_50970|chr2_201355339_201374792_KCTD18_NM_-|	9.46	-	uc002uvu.1:201362431:201371739:-;uc002uvs.3:201354822:201371739:-;uc002uvt.3:201354822:201371739:-
chr2:201910215-201910288:mpeak_757|chr2_201846594_201936392_FAM126B_NM_-	-	FAM126B	HP-Cyto_18h_Positive_IPA25pc_noCutoffOfP	chr2	201910198	201910276	chr2:201910198-201910276:mpeak_45615|chr2_201846594_201936392_FAM126B_NM_-|	42.79	-	-
chr2:202006162-202006330:mpeak_758|chr2_201980826_202027718_CFLAR_NM_+	+	CFLAR	HP-Cyto_18h_Positive_IPA25pc_noCutoffOfP	chr2	202006163	202006330	chr2:202006163-202006330:mpeak_45630|chr2_201980826_202027718_CFLAR_NM_+|	51.51	+	uc021vuw.1:201994588:202018945:+;uc010fsw.3:202005106:202025663:+;uc002uxb.4:201994588:202028696:+;uc010zhk.2:201997758:202027803:+;uc010zhl.2:201997758:202028696:+;uc002uxc.4:201994588:202028696:+;uc002uxd.4:201994588:202028696:+;uc010fsx.3:201994588:202028667:+;uc002uxf.3:201994588:202027803:+;uc010zhm.2:201997758:202027803:+
chr2:202006162-202006330:mpeak_758|chr2_201980826_202027718_CFLAR_NM_+	+	CFLAR	HP-Cyto_6h_Positive_IPA25pc_noCutoffOfP	chr2	202006163	202006332	chr2:202006163-202006332:mpeak_47023|chr2_201980826_202027718_CFLAR_NM_+|	87.51	+	uc021vuw.1:201994588:202018945:+;uc010fsw.3:202005106:202025663:+;uc002uxb.4:201994588:202028696:+;uc010zhk.2:201997758:202027803:+;uc010zhl.2:201997758:202028696:+;uc002uxc.4:201994588:202028696:+;uc002uxd.4:201994588:202028696:+;uc010fsx.3:201994588:202028667:+;uc002uxf.3:201994588:202027803:+;uc010zhm.2:201997758:202027803:+
chr2:206166247-206166429:mpeak_760|chr2_205410515_206480179_PARD3B_NM_+	+	PARD3B	HP-Cyto_UT_Positive_IPA25pc_noCutoffOfP	chr2	206166241	206166431	chr2:206166241-206166431:mpeak_51229|chr2_205410515_206480179_PARD3B_NM_+|	7.34	+	uc010fub.2:205410722:206166631:+;uc002vao.2:205410722:206480537:+;uc002vap.2:205410722:206480537:+;uc002vaq.2:205410722:206480537:+;uc002var.2:205410722:206480537:+
chr2:206265731-206265830:mpeak_761|chr2_205410515_206480179_PARD3B_NM_+	+	PARD3B	HP-Cyto_UT_Positive_IPA25pc_noCutoffOfP	chr2	206265731	206265853	chr2:206265731-206265853:mpeak_51230|chr2_205410515_206480179_PARD3B_NM_+|	6.16	+	uc002vao.2:205410722:206480537:+;uc002vap.2:205410722:206480537:+;uc002vaq.2:205410722:206480537:+;uc002var.2:205410722:206480537:+
chr22:29447378-29447443:mpeak_830|chr22_29279754_29449566_ZNRF3_NM_+	+	ZNRF3	HP-Cyto_6h_Positive_IPA25pc_noCutoffOfP	chr22	29447384	29447444	chr22:29447384-29447444:mpeak_51959|chr22_29279754_29449566_ZNRF3_NM_+mpeak_51959|chr22_29279754_29449566_ZNRF3_NM_+||	23.86	+	uc021wnq.1:29383063:29449610:+;uc003aeg.3:29279754:29449610:+
chr22:31736657-31736718:mpeak_832|chr22_31723295_31742249_PATZ1_NM_-	-	PATZ1	HP-Cyto_UT_Positive_IPA25pc_noCutoffOfP	chr22	31736655	31736718	chr22:31736655-31736718:mpeak_56598|chr22_31723295_31742249_PATZ1_NM_-|	271.59	-	uc003akp.3:31723261:31741588:-;uc003akq.3:31722876:31741588:-;uc003akr.3:31722876:31741588:-
chr2:232209837-232209919:mpeak_767|chr2_232063259_232236223_ARMC9_NM_+	+	ARMC9	HP-Cyto_UT_Positive_IPA25pc_noCutoffOfP	chr2	232209856	232209917	chr2:232209856-232209917:mpeak_51938|chr2_232063259_232236223_ARMC9_NM_+|	32.92	+	uc031rrs.1:232070951:232236246:+
chr2:26032988-26033124:mpeak_703|chr2_25967345_26101312_ASXL2_NM_-	-	ASXL2	HP-Cyto_6h_Positive_IPA25pc_noCutoffOfP	chr2	26032900	26033124	chr2:26032900-26033124:mpeak_42482|chr2_25967345_26101312_ASXL2_NM_-|	25.97	-	uc002rgs.2:25964897:26101091:-
chr2:32622078-32622155:mpeak_705|chr2_32582095_32842791_BIRC6_NM_+	+	BIRC6	HP-Cyto_6h_Positive_IPA25pc_noCutoffOfP	chr2	32622095	32622163	chr2:32622095-32622163:mpeak_42809|chr2_32582095_32842791_BIRC6_NM_+|	41.53	+	uc010ezu.3:32582229:32842971:+
chr2:32622078-32622155:mpeak_705|chr2_32582095_32842791_BIRC6_NM_+	+	BIRC6	HP-Cyto_UT_Positive_IPA25pc_noCutoffOfP	chr2	32622078	32622154	chr2:32622078-32622154:mpeak_46539|chr2_32582095_32842791_BIRC6_NM_+|	53.33	+	uc010ezu.3:32582229:32842971:+
chr2:39278523-39278586:mpeak_709|chr2_39213456_39347604_SOS1_NM_-	-	SOS1	HP-Cyto_UT_Positive_IPA25pc_noCutoffOfP	chr2	39278486	39278586	chr2:39278486-39278586:mpeak_46785|chr2_39213456_39347604_SOS1_NM_-|	30.68	-	uc002rrk.4:39212964:39347563:-
chr2:44002076-44002134:mpeak_713|chr2_44001177_44036843_DYNC2LI1_NM_+	+	DYNC2LI1	HP-Cyto_18h_Positive_IPA25pc_noCutoffOfP	chr2	44002076	44002133	chr2:44002076-44002133:mpeak_41517|chr2_44001177_44036843_DYNC2LI1_NM_+|	3.63	+	uc002rth.3:44001277:44021881:+;uc002rti.3:44001277:44019929:+;uc002rtl.3:44001277:44036906:+;uc002rtk.3:44001277:44036906:+
chr2:48045547-48045608:mpeak_714|chr2_48035386_48132932_FBXO11_NM_-	-	FBXO11	HP-Cyto_6h_Positive_IPA25pc_noCutoffOfP	chr2	48045548	48045609	chr2:48045548-48045609:mpeak_43293|chr2_48035386_48132932_FBXO11_NM_-|	9.04	-	uc010fbk.3:48035256:48049425:-;uc021vhe.1:48040286:48063127:-;uc010fbl.3:48035256:48066888:-;uc002rwe.3:48035256:48132859:-
chr2:73682287-73682452:mpeak_721|chr2_73612885_73836694_ALMS1_NM_+	+	ALMS1	HP-Cyto_18h_Positive_IPA25pc_noCutoffOfP	chr2	73682287	73682443	chr2:73682287-73682443:mpeak_42430|chr2_73612885_73836694_ALMS1_NM_+|	53.24	+	uc002sjg.3:73675493:73800584:+;uc002sjh.1:73675493:73830435:+;uc002sje.1:73612996:73836739:+;uc002sjf.1:73612996:73836739:+
chr3:108276050-108276226:mpeak_892|chr3_108270166_108308491_KIAA1524_NM_-	-	KIAA1524	HP-Cyto_UT_Positive_IPA25pc_noCutoffOfP	chr3	108276050	108276226	chr3:108276050-108276226:mpeak_60149|chr3_108270166_108308491_KIAA1524_NM_-|	31.27	-	uc003dxb.4:108269995:108308222:-
chr3:12451863-12451927:mpeak_852|chr3_12329348_12475396_PPARG_NM_+	+	PPARG	HP-Cyto_UT_Positive_IPA25pc_noCutoffOfP	chr3	12451863	12451927	chr3:12451863-12451927:mpeak_57756|chr3_12329348_12475396_PPARG_NM_+|	5.38	+	uc031rym.1:12421204:12475644:+;uc003bwr.3:12421204:12475644:+;uc003bws.3:12421204:12475644:+;uc003bwu.3:12421204:12475644:+;uc003bwv.3:12421204:12475414:+;uc003bwx.3:12393091:12475644:+
chr3:136323167-136323323:mpeak_897|chr3_136057119_136471245_STAG1_NM_-	-	STAG1	HP-Cyto_6h_Positive_IPA25pc_noCutoffOfP	chr3	136323167	136323323	chr3:136323167-136323323:mpeak_56354|chr3_136057119_136471245_STAG1_NM_-|	14.25	-	uc003era.1:136057095:136349740:-;uc003erb.1:136057095:136349740:-;uc003ere.3:136237234:136349740:-
chr3:140955171-140955338:mpeak_898|chr3_140950666_141011109_PXYLP1_NM_+	+	PXYLP1	HP-Cyto_18h_Positive_IPA25pc_noCutoffOfP	chr3	140955174	140955335	chr3:140955174-140955335:mpeak_55088|chr3_140950666_141011109_PXYLP1_NM_+|	6.25	+	-
chr3:140955171-140955338:mpeak_898|chr3_140950666_141011109_PXYLP1_NM_+	+	PXYLP1	HP-Cyto_6h_Positive_IPA25pc_noCutoffOfP	chr3	140955174	140955338	chr3:140955174-140955338:mpeak_56477|chr3_140950666_141011109_PXYLP1_NM_+|	17.67	+	-
chr3:141305681-141305804:mpeak_900|chr3_141205888_141331124_RASA2_NM_+	+	RASA2	HP-Cyto_6h_Positive_IPA25pc_noCutoffOfP	chr3	141305681	141305804	chr3:141305681-141305804:mpeak_56498|chr3_141205888_141331124_RASA2_NM_+|	4.65	+	uc003etz.1:141205925:141331155:+;uc010huq.1:141205925:141331155:+;uc003eua.1:141205925:141331155:+
chr3:142389826-142389962:mpeak_901|chr3_142315228_142430713_PLS1_NM_+	+	PLS1	HP-Cyto_18h_Positive_IPA25pc_noCutoffOfP	chr3	142389827	142389878	chr3:142389827-142389878:mpeak_55182|chr3_142315228_142430713_PLS1_NM_+|	39.23	+	uc010huv.3:142383079:142430849:+;uc003euz.3:142383079:142430849:+;uc003eva.3:142383079:142430849:+
chr3:15011807-15011865:mpeak_857|chr3_14989090_15084340_NR2C2_NM_+	+	NR2C2	HP-Cyto_6h_Positive_IPA25pc_noCutoffOfP	chr3	15011807	15011865	chr3:15011807-15011865:mpeak_53305|chr3_14989090_15084340_NR2C2_NM_+mpeak_53305|chr3_14989090_15084340_NR2C2_NM_+||	4.47	+	-
chr3:157841646-157841780:mpeak_902|chr3_157827840_158261971_RSRC1_NM_+	+	RSRC1	HP-Cyto_UT_Positive_IPA25pc_noCutoffOfP	chr3	157841644	157841780	chr3:157841644-157841780:mpeak_61772|chr3_157827840_158261971_RSRC1_NM_+|	17.05	+	uc011bou.2:157839893:158187158:+;uc003fbt.4:157839893:158262064:+;uc003fbu.2:157839893:158262064:+;uc003fbv.4:157839893:158262064:+
chr3:167742298-167742384:mpeak_904|chr3_167728206_167813713_GOLIM4_NM_-	-	GOLIM4	HP-Cyto_18h_Positive_IPA25pc_noCutoffOfP	chr3	167742298	167742384	chr3:167742298-167742384:mpeak_55758|chr3_167728206_167813713_GOLIM4_NM_-|	11.92	-	uc003ffe.2:167728056:167813073:-;uc011bpe.1:167728056:167813073:-;uc011bpf.1:167728056:167813073:-;uc011bpg.1:167728056:167813073:-
chr3:169201259-169201803:mpeak_905|chr3_168802831_169381563_MECOM_NM_-	-	MECOM	HP-Cyto_UT_Positive_IPA25pc_noCutoffOfP	chr3	169201280	169201803	chr3:169201280-169201803:mpeak_61993|chr3_168802831_169381563_MECOM_NM_-|	1877.52	-	uc011bpl.1:168867408:169381160:-;uc011bpj.1:168802696:169381160:-;uc010hwn.2:168819849:169381160:-
chr3:185199821-185199873:mpeak_911|chr3_185000728_185200142_MAP3K13_NM_+	+	MAP3K13	HP-Cyto_UT_Positive_IPA25pc_noCutoffOfP	chr3	185199822	185199873	chr3:185199822-185199873:mpeak_62527|chr3_185000728_185200142_MAP3K13_NM_+|	8.7	+	uc010hyf.3:185146369:185200244:+;uc003fpi.3:185146369:185200244:+;uc010hyg.3:185165655:185200244:+;uc011brt.2:185003393:185200244:+;uc011bru.2:185046994:185200244:+
chr3:185331128-185331204:mpeak_912|chr3_185304030_185347569_SENP2_NM_+	+	SENP2	HP-Cyto_6h_Positive_IPA25pc_noCutoffOfP	chr3	185331128	185331185	chr3:185331128-185331185:mpeak_57695|chr3_185304030_185347569_SENP2_NM_+|	25.46	+	uc011brv.2:185300534:185347632:+;uc003fpn.3:185304201:185347632:+;uc011brw.2:185324229:185347632:+
chr3:194305195-194305466:mpeak_914|chr3_194304996_194310583_TMEM44-AS1_NR_+	+	TMEM44-AS1	HP-Cyto_UT_Positive_IPA25pc_noCutoffOfP	chr3	194305336	194305462	chr3:194305336-194305462:mpeak_62728|chr3_194304996_194310583_TMEM44-AS1_NR_+|	4.24	+	-
chr3:195966418-195966624:mpeak_917|chr3_195965765_196014584_PCYT1A_NM_-	-	PCYT1A	HP-Cyto_6h_Positive_IPA25pc_noCutoffOfP	chr3	195966419	195966622	chr3:195966419-195966622:mpeak_57976|chr3_195965765_196014584_PCYT1A_NM_-|	83.22	-	uc003fwg.3:195965558:195997402:-;uc003fwh.3:195965558:195997402:-
chr3:195997283-195997425:mpeak_918|chr3_195965765_196014584_PCYT1A_NM_-	-	PCYT1A	HP-Cyto_6h_Positive_IPA25pc_noCutoffOfP	chr3	195997318	195997424	chr3:195997318-195997424:mpeak_57980|chr3_195965765_196014584_PCYT1A_NM_-|	34.77	-	uc003fwg.3:195965558:195997402:-;uc003fwh.3:195965558:195997402:-
chr3:196014396-196014538:mpeak_919|chr3_195965765_196014584_PCYT1A_NM_-	-	PCYT1A	HP-Cyto_6h_Positive_IPA25pc_noCutoffOfP	chr3	196014396	196014538	chr3:196014396-196014538:mpeak_57981|chr3_195965765_196014584_PCYT1A_NM_-|	38.43	-	-
chr3:27465547-27465648:mpeak_860|chr3_27418336_27525911_SLC4A7_NM_-	-	SLC4A7	HP-Cyto_18h_Positive_IPA25pc_noCutoffOfP	chr3	27465547	27465653	chr3:27465547-27465653:mpeak_52105|chr3_27418336_27525911_SLC4A7_NM_-|	19.4	-	uc010hfl.4:27418254:27465574:-;uc003cdv.4:27418254:27498174:-;uc003cdw.4:27418254:27498174:-;uc011axb.3:27418254:27525617:-;uc011aww.3:27418254:27525617:-;uc011awx.3:27418254:27525617:-;uc021wun.2:27418254:27525617:-;uc003cdu.5:27418254:27525617:-;uc011axa.3:27418254:27525617:-;uc011awy.3:27418254:27525617:-;uc010hfm.3:27465482:27525617:-
chr3:27493911-27494042:mpeak_861|chr3_27418336_27525911_SLC4A7_NM_-	-	SLC4A7	HP-Cyto_18h_Positive_IPA25pc_noCutoffOfP	chr3	27493900	27494042	chr3:27493900-27494042:mpeak_52111|chr3_27418336_27525911_SLC4A7_NM_-|	115.12	-	uc003cdv.4:27418254:27498174:-;uc003cdw.4:27418254:27498174:-;uc011axb.3:27418254:27525617:-;uc011aww.3:27418254:27525617:-;uc011awx.3:27418254:27525617:-;uc021wun.2:27418254:27525617:-;uc003cdu.5:27418254:27525617:-;uc011axa.3:27418254:27525617:-;uc011awy.3:27418254:27525617:-;uc010hfm.3:27465482:27525617:-
chr3:30720327-30720390:mpeak_862|chr3_30647993_30732911_TGFBR2_NM_+	+	TGFBR2	HP-Cyto_UT_Positive_IPA25pc_noCutoffOfP	chr3	30720327	30720390	chr3:30720327-30720390:mpeak_58227|chr3_30647993_30732911_TGFBR2_NM_+|	149.51	+	uc003cen.3:30648375:30733091:+;uc003ceo.3:30648375:30733091:+
chr3:3172273-3172365:mpeak_844|chr3_3168599_3189589_TRNT1_NM_+	+	TRNT1	HP-Cyto_18h_Positive_IPA25pc_noCutoffOfP	chr3	3172245	3172367	chr3:3172245-3172367:mpeak_51423|chr3_3168599_3189589_TRNT1_NM_+|	29.42	+	uc003bpp.4:3170724:3189838:+;uc010hbv.3:3170724:3189838:+
chr3:3172273-3172365:mpeak_844|chr3_3168599_3189589_TRNT1_NM_+	+	TRNT1	HP-Cyto_UT_Positive_IPA25pc_noCutoffOfP	chr3	3172276	3172369	chr3:3172276-3172369:mpeak_57455|chr3_3168599_3189589_TRNT1_NM_+|	80.92	+	uc003bpp.4:3170724:3189838:+;uc010hbv.3:3170724:3189838:+
chr3:3213831-3213990:mpeak_845|chr3_3192729_3221401_CRBN_NM_-	-	CRBN	HP-Cyto_6h_Positive_IPA25pc_noCutoffOfP	chr3	3213841	3213990	chr3:3213841-3213990:mpeak_52903|chr3_3192729_3221401_CRBN_NM_-|	75.41	-	uc003bpr.3:3192548:3221371:-;uc003bpq.3:3192548:3221371:-;uc011aso.2:3196431:3215930:-
chr3:3213831-3213990:mpeak_845|chr3_3192729_3221401_CRBN_NM_-	-	CRBN	HP-Cyto_UT_Positive_IPA25pc_noCutoffOfP	chr3	3213831	3213991	chr3:3213831-3213991:mpeak_57470|chr3_3192729_3221401_CRBN_NM_-|	94.46	-	uc003bpr.3:3192548:3221371:-;uc003bpq.3:3192548:3221371:-;uc011aso.2:3196431:3215930:-
chr3:37186335-37186652:mpeak_864|chr3_37095452_37217851_LRRFIP2_NM_-	-	LRRFIP2	HP-Cyto_6h_Positive_IPA25pc_noCutoffOfP	chr3	37186335	37186559	chr3:37186335-37186559:mpeak_53817|chr3_37095452_37217851_LRRFIP2_NM_-|	38.66	-	uc011ayf.1:37095341:37190474:-;uc003cgp.2:37095341:37190474:-;uc003cgs.3:37095341:37190474:-;uc003cgt.3:37095341:37190474:-
chr3:37214137-37214197:mpeak_865|chr3_37095452_37217851_LRRFIP2_NM_-	-	LRRFIP2	HP-Cyto_6h_Positive_IPA25pc_noCutoffOfP	chr3	37214279	37214428	chr3:37214279-37214428:mpeak_53823|chr3_37095452_37217851_LRRFIP2_NM_-|	40.86	-	-
chr3:37214279-37214427:mpeak_866|chr3_37095452_37217851_LRRFIP2_NM_-	-	LRRFIP2	HP-Cyto_6h_Positive_IPA25pc_noCutoffOfP	chr3	37214279	37214428	chr3:37214279-37214428:mpeak_53823|chr3_37095452_37217851_LRRFIP2_NM_-|	40.86	-	-
chr3:37317160-37317528:mpeak_867|chr3_37284681_37407570_GOLGA4_NM_+	+	GOLGA4	HP-Cyto_18h_Positive_IPA25pc_noCutoffOfP	chr3	37317160	37317234	chr3:37317160-37317234:mpeak_52320|chr3_37284681_37407570_GOLGA4_NM_+|	14.66	+	uc003cgu.2:37285041:37330782:+;uc010hgr.2:37285041:37369314:+;uc003cgv.3:37285041:37402763:+;uc003cgw.3:37285041:37407594:+;uc010hgs.3:37285041:37407594:+
chr3:37317160-37317528:mpeak_867|chr3_37284681_37407570_GOLGA4_NM_+	+	GOLGA4	HP-Cyto_18h_Positive_IPA25pc_noCutoffOfP	chr3	37317343	37317528	chr3:37317343-37317528:mpeak_52321|chr3_37284681_37407570_GOLGA4_NM_+|	99.26	+	uc003cgu.2:37285041:37330782:+;uc010hgr.2:37285041:37369314:+;uc003cgv.3:37285041:37402763:+;uc003cgw.3:37285041:37407594:+;uc010hgs.3:37285041:37407594:+
chr3:37317160-37317528:mpeak_867|chr3_37284681_37407570_GOLGA4_NM_+	+	GOLGA4	HP-Cyto_6h_Positive_IPA25pc_noCutoffOfP	chr3	37317340	37317528	chr3:37317340-37317528:mpeak_53827|chr3_37284681_37407570_GOLGA4_NM_+|	95.71	+	uc003cgu.2:37285041:37330782:+;uc010hgr.2:37285041:37369314:+;uc003cgv.3:37285041:37402763:+;uc003cgw.3:37285041:37407594:+;uc010hgs.3:37285041:37407594:+
chr3:37317160-37317528:mpeak_867|chr3_37284681_37407570_GOLGA4_NM_+	+	GOLGA4	HP-Cyto_6h_Positive_IPA25pc_noCutoffOfP	chr3	37317621	37317981	chr3:37317621-37317981:mpeak_53828|chr3_37284681_37407570_GOLGA4_NM_+|	423.46	+	uc003cgu.2:37285041:37330782:+;uc010hgr.2:37285041:37369314:+;uc003cgv.3:37285041:37402763:+;uc003cgw.3:37285041:37407594:+;uc010hgs.3:37285041:37407594:+
chr3:37318695-37318753:mpeak_868|chr3_37284681_37407570_GOLGA4_NM_+	+	GOLGA4	HP-Cyto_6h_Positive_IPA25pc_noCutoffOfP	chr3	37318695	37318753	chr3:37318695-37318753:mpeak_53830|chr3_37284681_37407570_GOLGA4_NM_+|	18.65	+	uc003cgu.2:37285041:37330782:+;uc010hgr.2:37285041:37369314:+;uc003cgv.3:37285041:37402763:+;uc003cgw.3:37285041:37407594:+;uc010hgs.3:37285041:37407594:+
chr3:44401147-44401314:mpeak_871|chr3_44379610_44448933_TCAIM_NM_+	+	TCAIM	HP-Cyto_UT_Positive_IPA25pc_noCutoffOfP	chr3	44401235	44401314	chr3:44401235-44401314:mpeak_58667|chr3_44379610_44448933_TCAIM_NM_+|	35.84	+	uc010him.3:44396274:44449174:+;uc003cnd.4:44396274:44449174:+
chr3:56703721-56703790:mpeak_873|chr3_56657871_56717135_FAM208A_NM_-	-	FAM208A	HP-Cyto_UT_Positive_IPA25pc_noCutoffOfP	chr3	56703725	56703790	chr3:56703725-56703790:mpeak_59312|chr3_56657871_56717135_FAM208A_NM_-|	61.86	-	uc003die.4:56657815:56717034:-;uc003did.4:56657064:56717034:-
chr3:56716067-56716136:mpeak_874|chr3_56657871_56717135_FAM208A_NM_-	-	FAM208A	HP-Cyto_UT_Positive_IPA25pc_noCutoffOfP	chr3	56716071	56716132	chr3:56716071-56716132:mpeak_59315|chr3_56657871_56717135_FAM208A_NM_-|	68.38	-	uc003die.4:56657815:56717034:-;uc003did.4:56657064:56717034:-
chr3:63897802-63897863:mpeak_881|chr3_63850232_63985125_ATXN7_NM_+	+	ATXN7	HP-Cyto_6h_Positive_IPA25pc_noCutoffOfP	chr3	63897802	63897863	chr3:63897802-63897863:mpeak_54782|chr3_63850232_63985125_ATXN7_NM_+|	27.7	+	-
chr3:9423893-9423972:mpeak_848|chr3_9404716_9426207_THUMPD3_NM_+	+	THUMPD3	HP-Cyto_UT_Positive_IPA25pc_noCutoffOfP	chr3	9423893	9423972	chr3:9423893-9423972:mpeak_57559|chr3_9404716_9426207_THUMPD3_NM_+|	80.69	+	uc003bro.4:9406752:9426372:+;uc003brn.4:9406752:9426372:+
chr4:113092589-113092737:mpeak_947|chr4_113066552_113107848_C4orf32_NM_+	+	C4orf32	HP-Cyto_6h_Positive_IPA25pc_noCutoffOfP	chr4	113092589	113092656	chr4:113092589-113092656:mpeak_60612|chr4_113066552_113107848_C4orf32_NM_+|	85.86	+	uc003iah.2:113066736:113108094:+
chr4:120138691-120138813:mpeak_951|chr4_120133781_120213492_USP53_NM_+	+	USP53	HP-Cyto_18h_Positive_IPA25pc_noCutoffOfP	chr4	120138691	120138813	chr4:120138691-120138813:mpeak_59268|chr4_120133781_120213492_USP53_NM_+|	3.73	+	-
chr4:120138691-120138813:mpeak_951|chr4_120133781_120213492_USP53_NM_+	+	USP53	HP-Cyto_UT_Positive_IPA25pc_noCutoffOfP	chr4	120138691	120138813	chr4:120138691-120138813:mpeak_65750|chr4_120133781_120213492_USP53_NM_+|	11.57	+	-
chr4:140427133-140427478:mpeak_956|chr4_140417675_140477923_SETD7_NM_-	-	SETD7	HP-Cyto_18h_Positive_IPA25pc_noCutoffOfP	chr4	140427134	140427428	chr4:140427134-140427428:mpeak_59550|chr4_140417675_140477923_SETD7_NM_-|	91.54	-	-
chr4:140427133-140427478:mpeak_956|chr4_140417675_140477923_SETD7_NM_-	-	SETD7	HP-Cyto_6h_Positive_IPA25pc_noCutoffOfP	chr4	140427088	140427428	chr4:140427088-140427428:mpeak_61027|chr4_140417675_140477923_SETD7_NM_-|	139.64	-	-
chr4:140427133-140427478:mpeak_956|chr4_140417675_140477923_SETD7_NM_-	-	SETD7	HP-Cyto_UT_Positive_IPA25pc_noCutoffOfP	chr4	140427180	140427491	chr4:140427180-140427491:mpeak_66063|chr4_140417675_140477923_SETD7_NM_-|	107.57	-	-
chr4:148787885-148788066:mpeak_962|chr4_148653452_148993143_ARHGAP10_NM_+	+	ARHGAP10	HP-Cyto_6h_Positive_IPA25pc_noCutoffOfP	chr4	148787885	148787974	chr4:148787885-148787974:mpeak_61247|chr4_148653452_148993143_ARHGAP10_NM_+|	27.72	+	uc003ilf.3:148653452:148993232:+
chr4:285588-285645:mpeak_923|chr4_266419_289944_ZNF732_NM_-	-	ZNF732	HP-Cyto_6h_Positive_IPA25pc_noCutoffOfP	chr4	285588	285645	chr4:285588-285645:mpeak_58213|chr4_266419_289944_ZNF732_NM_-|	7.9	-	uc011buu.1:264887:289851:-;uc021xka.1:264887:299099:-
chr4:7050722-7050806:mpeak_929|chr4_7045155_7055788_TADA2B_NM_+	+	TADA2B	HP-Cyto_6h_Positive_IPA25pc_noCutoffOfP	chr4	7050744	7050803	chr4:7050744-7050803:mpeak_58589|chr4_7045155_7055788_TADA2B_NM_+|	37.16	+	uc003gjw.4:7045306:7056781:+;uc010idi.3:7045306:7056781:+
chr4:74014526-74014689:mpeak_939|chr4_73942007_74124502_ANKRD17_NM_-	-	ANKRD17	HP-Cyto_6h_Positive_IPA25pc_noCutoffOfP	chr4	74014526	74014691	chr4:74014526-74014691:mpeak_59660|chr4_73942007_74124502_ANKRD17_NM_-|	22.04	-	uc011cbd.1:73978986:74019717:-;uc003hgo.3:73941947:74088744:-;uc003hgp.3:73941947:74124385:-;uc003hgq.3:73941947:74124385:-;uc003hgr.3:73941947:74124385:-
chr4:87718012-87718090:mpeak_941|chr4_87515467_87735608_PTPN13_NM_+	+	PTPN13	HP-Cyto_UT_Positive_IPA25pc_noCutoffOfP	chr4	87718012	87718090	chr4:87718012-87718090:mpeak_65027|chr4_87515467_87735608_PTPN13_NM_+|	7.31	+	uc003hqc.1:87692422:87726521:+;uc003hpy.3:87556409:87735704:+;uc003hpz.3:87556409:87735704:+;uc003hqa.3:87556409:87735704:+;uc003hqb.3:87556409:87735704:+
chr4:95921602-95921682:mpeak_944|chr4_95679127_96075698_BMPR1B_NM_+	+	BMPR1B	HP-Cyto_18h_Positive_IPA25pc_noCutoffOfP	chr4	95921602	95921682	chr4:95921602-95921682:mpeak_58786|chr4_95679127_96075698_BMPR1B_NM_+|	39.59	+	-
chr4:95986868-95987088:mpeak_945|chr4_95679127_96075698_BMPR1B_NM_+	+	BMPR1B	HP-Cyto_18h_Positive_IPA25pc_noCutoffOfP	chr4	95986958	95987027	chr4:95986958-95987027:mpeak_58789|chr4_95679127_96075698_BMPR1B_NM_+|	22.06	+	uc031sgn.1:95972850:96075824:+
chr5:112164545-112164663:mpeak_994|chr5_112043201_112173249_APC_NM_+	+	APC	HP-Cyto_18h_Positive_IPA25pc_noCutoffOfP	chr5	112164545	112164663	chr5:112164545-112164663:mpeak_62692|chr5_112043201_112173249_APC_NM_+|	315.46	+	uc003kpz.4:112090587:112179823:+;uc003kpy.4:112090587:112179823:+;uc010jbz.3:112151206:112179823:+;uc011cvt.2:112043414:112179823:+
chr5:112164545-112164663:mpeak_994|chr5_112043201_112173249_APC_NM_+	+	APC	HP-Cyto_6h_Positive_IPA25pc_noCutoffOfP	chr5	112164546	112164663	chr5:112164546-112164663:mpeak_64231|chr5_112043201_112173249_APC_NM_+|	22.69	+	uc003kpz.4:112090587:112179823:+;uc003kpy.4:112090587:112179823:+;uc010jbz.3:112151206:112179823:+;uc011cvt.2:112043414:112179823:+
chr5:112783761-112783899:mpeak_995|chr5_112363179_112824527_MCC_NM_-	-	MCC	HP-Cyto_18h_Positive_IPA25pc_noCutoffOfP	chr5	112783761	112783859	chr5:112783761-112783859:mpeak_62748|chr5_112363179_112824527_MCC_NM_-|	2.74	-	uc003kql.4:112362998:112824111:-
chr5:134258978-134259402:mpeak_999|chr5_134240809_134296275_PCBD2_NM_+	+	PCBD2	HP-Cyto_18h_Positive_IPA25pc_noCutoffOfP	chr5	134258979	134259406	chr5:134258979-134259406:mpeak_63379|chr5_134240809_134296275_PCBD2_NM_+|	40.39	+	uc010jdz.3:134240829:134296371:+
chr5:134258978-134259402:mpeak_999|chr5_134240809_134296275_PCBD2_NM_+	+	PCBD2	HP-Cyto_18h_Positive_IPA25pc_noCutoffOfP	chr5	134259465	134260546	chr5:134259465-134260546:mpeak_63381|chr5_134240809_134296275_PCBD2_NM_+|	370.72	+	uc010jdz.3:134240829:134296371:+
chr5:145609308-145609478:mpeak_1002|chr5_145583162_145665509_RBM27_NM_+	+	RBM27	HP-Cyto_6h_Positive_IPA25pc_noCutoffOfP	chr5	145609308	145609482	chr5:145609308-145609482:mpeak_65473|chr5_145583162_145665509_RBM27_NM_+|	28.26	+	uc003lny.2:145583328:145649147:+;uc003lnz.4:145583328:145665593:+
chr5:159831454-159831579:mpeak_1011|chr5_159830471_159846168_SLU7_NM_-	-	SLU7	HP-Cyto_6h_Positive_IPA25pc_noCutoffOfP	chr5	159831453	159831579	chr5:159831453-159831579:mpeak_65831|chr5_159830471_159846168_SLU7_NM_-|	60.39	-	uc003lyg.3:159830291:159842301:-
chr5:1628802-1628912:mpeak_964|chr5_1599942_1634120_LOC728613_NR_-	-	LOC728613	HP-Cyto_6h_Positive_IPA25pc_noCutoffOfP	chr5	1628808	1628879	chr5:1628808-1628879:mpeak_62004|chr5_1599942_1634120_LOC728613_NR_-|	52.67	-	-
chr5:176690158-176690211:mpeak_1019|chr5_176560079_176720832_NSD1_NM_+	+	NSD1	HP-Cyto_6h_Positive_IPA25pc_noCutoffOfP	chr5	176690156	176690211	chr5:176690156-176690211:mpeak_66169|chr5_176560079_176720832_NSD1_NM_+|	34.12	+	uc003mft.4:176562171:176722460:+;uc003mfr.4:176562104:176722460:+;uc003mfs.1:176562104:176707835:+;uc011dfx.2:176619013:176722460:+
chr5:178156728-178156778:mpeak_1020|chr5_178140622_178157703_ZNF354A_NM_-	-	ZNF354A	HP-Cyto_6h_Positive_IPA25pc_noCutoffOfP	chr5	178156728	178156778	chr5:178156728-178156778:mpeak_66299|chr5_178140622_178157703_ZNF354A_NM_-|	11.09	-	-
chr5:178156728-178156778:mpeak_1020|chr5_178140622_178157703_ZNF354A_NM_-	-	ZNF354A	HP-Cyto_UT_Positive_IPA25pc_noCutoffOfP	chr5	178156720	178156778	chr5:178156720-178156778:mpeak_71595|chr5_178140622_178157703_ZNF354A_NM_-|	29.79	-	-
chr5:37381714-37381797:mpeak_968|chr5_37379411_37752587_WDR70_NM_+	+	WDR70	HP-Cyto_6h_Positive_IPA25pc_noCutoffOfP	chr5	37381693	37381794	chr5:37381693-37381794:mpeak_62548|chr5_37379411_37752587_WDR70_NM_+|	20.73	+	uc010iva.1:37379469:37688083:+;uc003jkv.3:37379469:37752675:+
chr5:59755798-59755882:mpeak_970|chr5_58270907_59783925_PDE4D_NM_-	-	PDE4D	HP-Cyto_UT_Positive_IPA25pc_noCutoffOfP	chr5	59755798	59755882	chr5:59755798-59755882:mpeak_68059|chr5_58270907_59783925_PDE4D_NM_-|	12.73	-	-
chr5:64846283-64846347:mpeak_973|chr5_64814460_64858995_CENPK_NM_-	-	CENPK	HP-Cyto_6h_Positive_IPA25pc_noCutoffOfP	chr5	64846289	64846348	chr5:64846289-64846348:mpeak_63021|chr5_64814460_64858995_CENPK_NM_-|	33.79	-	uc003jts.3:64814301:64850734:-;uc003jtu.3:64814301:64850734:-
chr5:65338933-65339037:mpeak_974|chr5_65222381_65374250_ERBB2IP_NM_+	+	ERBB2IP	HP-Cyto_18h_Positive_IPA25pc_noCutoffOfP	chr5	65338935	65339037	chr5:65338935-65339037:mpeak_61596|chr5_65222381_65374250_ERBB2IP_NM_+|	63.01	+	uc003juk.2:65288546:65374358:+;uc011cqx.2:65288546:65374358:+;uc003jui.2:65288546:65374358:+;uc003jul.2:65288546:65374358:+;uc011cqy.2:65288546:65374358:+;uc003juj.2:65288546:65374358:+;uc011cqz.2:65288546:65374358:+;uc010iwx.2:65288546:65374358:+
chr5:70358521-70358636:mpeak_979|chr5_70331623_70363497_GTF2H2_NM_-	-	GTF2H2	HP-Cyto_6h_Positive_IPA25pc_noCutoffOfP	chr5	70358521	70358634	chr5:70358521-70358634:mpeak_63262|chr5_70331623_70363497_GTF2H2_NM_-|	13.09	-	uc003kav.4:70331503:70358590:-;uc003kau.4:70331503:70358590:-;uc003kay.1:70351150:70358590:-;uc003kat.1:70265930:70406597:-
chr5:70363308-70363525:mpeak_980|chr5_70331623_70363497_GTF2H2_NM_-	-	GTF2H2	HP-Cyto_6h_Positive_IPA25pc_noCutoffOfP	chr5	70363311	70363412	chr5:70363311-70363412:mpeak_63263|chr5_70331623_70363497_GTF2H2_NM_-|	18.14	-	uc003kat.1:70265930:70406597:-
chr5:72332956-72333016:mpeak_981|chr5_72251807_72383894_FCHO2_NM_+	+	FCHO2	HP-Cyto_18h_Positive_IPA25pc_noCutoffOfP	chr5	72332959	72333016	chr5:72332959-72333016:mpeak_61852|chr5_72251807_72383894_FCHO2_NM_+|	41.62	+	uc011csk.1:72251923:72333826:+;uc003kcl.3:72251923:72383917:+;uc011csl.2:72251923:72383917:+
chr5:74982768-74982924:mpeak_983|chr5_74970403_75013313_POC5_NM_-	-	POC5	HP-Cyto_UT_Positive_IPA25pc_noCutoffOfP	chr5	74982768	74982830	chr5:74982768-74982830:mpeak_68624|chr5_74970403_75013313_POC5_NM_-|	12.24	-	uc010izu.3:74970259:74998591:-;uc003keg.4:74970259:75008209:-;uc003keh.4:74970259:75008762:-
chr5:76327083-76327218:mpeak_984|chr5_76326209_76358876_AGGF1_NM_+	+	AGGF1	HP-Cyto_18h_Positive_IPA25pc_noCutoffOfP	chr5	76327083	76327147	chr5:76327083-76327147:mpeak_61970|chr5_76326209_76358876_AGGF1_NM_+|	13.3	+	uc003kes.3:76326591:76331583:+;uc003ket.3:76326591:76359077:+
chr5:80083450-80083502:mpeak_986|chr5_79950466_80171569_MSH3_NM_+	+	MSH3	HP-Cyto_18h_Positive_IPA25pc_noCutoffOfP	chr5	80083428	80083502	chr5:80083428-80083502:mpeak_62151|chr5_79950466_80171569_MSH3_NM_+|	20	+	uc003kgz.4:79950546:80171681:+
chr5:80083450-80083502:mpeak_986|chr5_79950466_80171569_MSH3_NM_+	+	MSH3	HP-Cyto_UT_Positive_IPA25pc_noCutoffOfP	chr5	80083450	80083500	chr5:80083450-80083500:mpeak_68846|chr5_79950466_80171569_MSH3_NM_+|	34.48	+	uc003kgz.4:79950546:80171681:+
chr5:86670648-86670707:mpeak_989|chr5_86564069_86686616_RASA1_NM_+	+	RASA1	HP-Cyto_6h_Positive_IPA25pc_noCutoffOfP	chr5	86670649	86670707	chr5:86670649-86670707:mpeak_63759|chr5_86564069_86686616_RASA1_NM_+|	17.51	+	uc003kiw.3:86564268:86686700:+;uc003kix.3:86564864:86686700:+;uc011ctv.2:86565066:86686700:+;uc011ctw.2:86626759:86686700:+;uc010jaw.3:86564864:86686700:+
chr6:101253628-101253684:mpeak_1062|chr6_100957409_101329248_ASCC3_NM_-	-	ASCC3	HP-Cyto_UT_Positive_IPA25pc_noCutoffOfP	chr6	101253628	101253684	chr6:101253628-101253684:mpeak_74796|chr6_100957409_101329248_ASCC3_NM_-|	26.05	-	uc003pqk.3:100957261:101315873:-;uc011eai.1:101095102:101296530:-;uc003pql.3:101163292:101315873:-
chr6:12015774-12015912:mpeak_1027|chr6_12012723_12163515_HIVEP1_NM_+	+	HIVEP1	HP-Cyto_6h_Positive_IPA25pc_noCutoffOfP	chr6	12015779	12015912	chr6:12015779-12015912:mpeak_66801|chr6_12012723_12163515_HIVEP1_NM_+|	14.04	+	uc003nac.3:12015861:12164694:+
chr6:135507084-135507165:mpeak_1070|chr6_135502452_135539001_MYB_NM_+	+	MYB	HP-Cyto_18h_Positive_IPA25pc_noCutoffOfP	chr6	135507084	135507162	chr6:135507084-135507162:mpeak_68665|chr6_135502452_135539001_MYB_NM_+|	12.64	+	uc003qfb.1:135502651:135524886:+;uc003qfh.3:135502651:135539118:+;uc003qfi.3:135502651:135539118:+;uc003qfc.3:135502651:135539118:+;uc010kgi.3:135502651:135539118:+;uc003qfq.3:135502651:135539118:+;uc010kgj.3:135502651:135539118:+;uc003qfo.3:135502651:135539118:+;uc003qfu.3:135502651:135539118:+
chr6:166999558-166999618:mpeak_1087|chr6_166826375_167275771_RPS6KA2_NM_-	-	RPS6KA2	HP-Cyto_6h_Positive_IPA25pc_noCutoffOfP	chr6	166999562	166999615	chr6:166999562-166999615:mpeak_70687|chr6_166826375_167275771_RPS6KA2_NM_-|	20.38	-	uc003qvb.1:166826249:167040507:-;uc003qvc.1:166826249:167275658:-;uc003qvd.1:166826249:167275658:-
chr6:24654704-24654766:mpeak_1032|chr6_24651297_24667115_TDP2_NM_-	-	TDP2	HP-Cyto_6h_Positive_IPA25pc_noCutoffOfP	chr6	24654670	24654766	chr6:24654670-24654766:mpeak_67052|chr6_24651297_24667115_TDP2_NM_-|	15.36	-	uc003nej.3:24651015:24667090:-;uc010jpu.1:24653150:24667090:-
chr6:29597209-29597269:mpeak_1034|chr6_29571493_29600962_GABBR1_NM_-	-	GABBR1	HP-Cyto_UT_Positive_IPA25pc_noCutoffOfP	chr6	29597213	29597269	chr6:29597213-29597269:mpeak_72817|chr6_29571493_29600962_GABBR1_NM_-|	8.41	-	uc003nmt.4:29571319:29600162:-;uc003nmu.4:29571319:29600162:-;uc011dls.1:29576481:29600162:-
chr6:56965250-56965373:mpeak_1042|chr6_56954807_57033220_ZNF451_NM_+	+	ZNF451	HP-Cyto_UT_Positive_IPA25pc_noCutoffOfP	chr6	56965249	56965373	chr6:56965249-56965373:mpeak_74069|chr6_56954807_57033220_ZNF451_NM_+|	25.97	+	uc011dxn.3:56955051:56966894:+;uc003pdk.2:56955051:57015707:+;uc003pdl.4:56955051:57018901:+;uc003pdm.2:56955051:57033267:+;uc003pdn.2:56955051:57033267:+
chr6:56974455-56974555:mpeak_1043|chr6_56954807_57033220_ZNF451_NM_+	+	ZNF451	HP-Cyto_18h_Positive_IPA25pc_noCutoffOfP	chr6	56974455	56974573	chr6:56974455-56974573:mpeak_67194|chr6_56954807_57033220_ZNF451_NM_+|	8.81	+	uc003pdk.2:56955051:57015707:+;uc003pdl.4:56955051:57018901:+;uc003pdm.2:56955051:57033267:+;uc003pdn.2:56955051:57033267:+
chr6:56974455-56974555:mpeak_1043|chr6_56954807_57033220_ZNF451_NM_+	+	ZNF451	HP-Cyto_UT_Positive_IPA25pc_noCutoffOfP	chr6	56974455	56974564	chr6:56974455-56974564:mpeak_74073|chr6_56954807_57033220_ZNF451_NM_+|	30.58	+	uc003pdk.2:56955051:57015707:+;uc003pdl.4:56955051:57018901:+;uc003pdm.2:56955051:57033267:+;uc003pdn.2:56955051:57033267:+
chr6:56976803-56976919:mpeak_1044|chr6_56954807_57033220_ZNF451_NM_+	+	ZNF451	HP-Cyto_UT_Positive_IPA25pc_noCutoffOfP	chr6	56976803	56976919	chr6:56976803-56976919:mpeak_74075|chr6_56954807_57033220_ZNF451_NM_+|	45.76	+	uc003pdk.2:56955051:57015707:+;uc003pdl.4:56955051:57018901:+;uc003pdm.2:56955051:57033267:+;uc003pdn.2:56955051:57033267:+
chr6:56989527-56989630:mpeak_1045|chr6_56954807_57033220_ZNF451_NM_+	+	ZNF451	HP-Cyto_UT_Positive_IPA25pc_noCutoffOfP	chr6	56989527	56989630	chr6:56989527-56989630:mpeak_74077|chr6_56954807_57033220_ZNF451_NM_+|	28.04	+	uc003pdk.2:56955051:57015707:+;uc003pdl.4:56955051:57018901:+;uc003pdm.2:56955051:57033267:+;uc003pdn.2:56955051:57033267:+
chr6:79726309-79726371:mpeak_1047|chr6_79651047_79788011_PHIP_NM_-	-	PHIP	HP-Cyto_UT_Positive_IPA25pc_noCutoffOfP	chr6	79726251	79726371	chr6:79726251-79726371:mpeak_74307|chr6_79651047_79788011_PHIP_NM_-|	114.01	-	uc003pir.3:79650409:79787785:-;uc011dyp.2:79650409:79787785:-
chr6:88139139-88139195:mpeak_1051|chr6_88117689_88173737_C6orf165_NM_+	+	C6orf165	HP-Cyto_6h_Positive_IPA25pc_noCutoffOfP	chr6	88139139	88139200	chr6:88139139-88139200:mpeak_68928|chr6_88117689_88173737_C6orf165_NM_+|	9.79	+	uc003plu.2:88119557:88144795:+;uc003plv.3:88119557:88173968:+;uc003plw.3:88126478:88173968:+
chr6:96600328-96600416:mpeak_1055|chr6_96463844_96651023_FUT9_NM_+	+	FUT9	HP-Cyto_UT_Positive_IPA25pc_noCutoffOfP	chr6	96600328	96600416	chr6:96600328-96600416:mpeak_74670|chr6_96463844_96651023_FUT9_NM_+|	21.32	+	-
chr7:104717397-104717648:mpeak_1128|chr7_104654636_104752271_KMT2E_NM_+	+	KMT2E	HP-Cyto_6h_Positive_IPA25pc_noCutoffOfP	chr7	104717397	104717650	chr7:104717397-104717650:mpeak_73434|chr7_104654636_104752271_KMT2E_NM_+|	11.09	+	uc010lja.1:104707195:104730720:+;uc010ljb.1:104681399:104730720:+;uc003vcl.3:104681399:104731869:+;uc003vcm.3:104681399:104753780:+;uc010ljc.3:104681399:104753780:+;uc031syt.1:104681399:104749029:+
chr7:105148526-105148627:mpeak_1129|chr7_105098373_105162685_PUS7_NM_-	-	PUS7	HP-Cyto_6h_Positive_IPA25pc_noCutoffOfP	chr7	105148716	105148999	chr7:105148716-105148999:mpeak_73465|chr7_105098373_105162685_PUS7_NM_-|	29.03	-	uc010lji.3:105098236:105148959:-;uc003vcx.3:105098236:105148959:-;uc003vcy.3:105098236:105148959:-;uc003vcz.1:105098236:105148959:-
chr7:23226722-23226866:mpeak_1099|chr7_23221445_23239786_NUPL2_NM_+	+	NUPL2	HP-Cyto_UT_Positive_IPA25pc_noCutoffOfP	chr7	23226693	23226866	chr7:23226693-23226866:mpeak_77264|chr7_23221445_23239786_NUPL2_NM_+|	10.53	+	uc003svu.3:23221704:23240364:+
chr7:5028684-5028820:mpeak_1092|chr7_5013615_5036240_RNF216P1_NR_+	+	RNF216P1	HP-Cyto_6h_Positive_IPA25pc_noCutoffOfP	chr7	5028684	5028815	chr7:5028684-5028815:mpeak_71022|chr7_5013615_5036240_RNF216P1_NR_+|	32.19	+	-
chr7:5028684-5028820:mpeak_1092|chr7_5013615_5036240_RNF216P1_NR_+	+	RNF216P1	HP-Cyto_UT_Positive_IPA25pc_noCutoffOfP	chr7	5028684	5028820	chr7:5028684-5028820:mpeak_76784|chr7_5013615_5036240_RNF216P1_NR_+|	74.54	+	-
chr7:5028946-5029003:mpeak_1093|chr7_5013615_5036240_RNF216P1_NR_+	+	RNF216P1	HP-Cyto_6h_Positive_IPA25pc_noCutoffOfP	chr7	5028684	5028815	chr7:5028684-5028815:mpeak_71022|chr7_5013615_5036240_RNF216P1_NR_+|	32.19	+	-
chr7:5028946-5029003:mpeak_1093|chr7_5013615_5036240_RNF216P1_NR_+	+	RNF216P1	HP-Cyto_UT_Positive_IPA25pc_noCutoffOfP	chr7	5028684	5028820	chr7:5028684-5028820:mpeak_76784|chr7_5013615_5036240_RNF216P1_NR_+|	74.54	+	-
chr7:63984949-63985087:mpeak_1105|chr7_63982878_64023505_ZNF680_NM_-	-	ZNF680	HP-Cyto_6h_Positive_IPA25pc_noCutoffOfP	chr7	63984951	63985012	chr7:63984951-63985012:mpeak_72265|chr7_63982878_64023505_ZNF680_NM_-|	10.42	-	uc003tta.2:63981538:64023332:-
chr7:63984949-63985087:mpeak_1105|chr7_63982878_64023505_ZNF680_NM_-	-	ZNF680	HP-Cyto_UT_Positive_IPA25pc_noCutoffOfP	chr7	63984949	63985087	chr7:63984949-63985087:mpeak_78108|chr7_63982878_64023505_ZNF680_NM_-|	22.27	-	uc003tta.2:63981538:64023332:-
chr7:63996827-63996897:mpeak_1106|chr7_63982878_64023505_ZNF680_NM_-	-	ZNF680	HP-Cyto_6h_Positive_IPA25pc_noCutoffOfP	chr7	63996827	63996882	chr7:63996827-63996882:mpeak_72266|chr7_63982878_64023505_ZNF680_NM_-|	5.41	-	uc003tta.2:63981538:64023332:-;uc003ttb.2:63986776:64023332:-
chr7:64257378-64257505:mpeak_1107|chr7_64254765_64312176_ZNF138_NR_+	+	ZNF138	HP-Cyto_UT_Positive_IPA25pc_noCutoffOfP	chr7	64257378	64257505	chr7:64257378-64257505:mpeak_78124|chr7_64254765_64312176_ZNF138_NR_+mpeak_78124|chr7_64254765_64291828_ZNF138_NM_+||	6.58	+	uc011kdp.3:64254946:64291864:+;uc031sxl.1:64254946:64292580:+;uc031sxm.1:64254946:64291864:+;uc011kdq.3:64254946:64292580:+;uc003ttg.4:64254946:64276008:+
chr7:64259829-64259900:mpeak_1108|chr7_64254765_64291828_ZNF138_NM_+	+	ZNF138	HP-Cyto_18h_Positive_IPA25pc_noCutoffOfP	chr7	64259829	64259891	chr7:64259829-64259891:mpeak_71122|chr7_64254765_64312176_ZNF138_NR_+mpeak_71122|chr7_64254765_64291828_ZNF138_NM_+||	6.24	+	uc011kdp.3:64254946:64291864:+;uc031sxl.1:64254946:64292580:+;uc031sxm.1:64254946:64291864:+;uc011kdq.3:64254946:64292580:+;uc003ttg.4:64254946:64276008:+
chr7:64259829-64259900:mpeak_1108|chr7_64254765_64291828_ZNF138_NM_+	+	ZNF138	HP-Cyto_UT_Positive_IPA25pc_noCutoffOfP	chr7	64259832	64259882	chr7:64259832-64259882:mpeak_78125|chr7_64254765_64312176_ZNF138_NR_+mpeak_78125|chr7_64254765_64291828_ZNF138_NM_+||	3.77	+	uc011kdp.3:64254946:64291864:+;uc031sxl.1:64254946:64292580:+;uc031sxm.1:64254946:64291864:+;uc011kdq.3:64254946:64292580:+;uc003ttg.4:64254946:64276008:+
chr7:64839278-64839333:mpeak_1109|chr7_64838711_64863253_ZNF92_NM_+	+	ZNF92	HP-Cyto_UT_Positive_IPA25pc_noCutoffOfP	chr7	64839278	64839333	chr7:64839278-64839333:mpeak_78161|chr7_64838711_64863253_ZNF92_NM_+|	10.59	+	uc003ttz.3:64838910:64864788:+;uc010kzu.3:64838910:64864788:+
chr7:6741631-6741716:mpeak_1096|chr7_6732334_6746566_ZNF12_NM_-	-	ZNF12	HP-Cyto_6h_Positive_IPA25pc_noCutoffOfP	chr7	6741626	6741716	chr7:6741626-6741716:mpeak_71181|chr7_6732334_6746566_ZNF12_NM_-|	14.17	-	uc003sqs.1:6730478:6744804:-;uc003sqt.1:6730478:6744804:-
chr7:6743580-6743643:mpeak_1097|chr7_6732334_6746566_ZNF12_NM_-	-	ZNF12	HP-Cyto_6h_Positive_IPA25pc_noCutoffOfP	chr7	6743586	6743643	chr7:6743586-6743643:mpeak_71184|chr7_6732334_6746566_ZNF12_NM_-|	17.03	-	uc003sqs.1:6730478:6744804:-;uc003sqt.1:6730478:6744804:-
chr7:72424695-72424782:mpeak_1114|chr7_72419136_72425302_NSUN5P2_NR_-	-	NSUN5P2	HP-Cyto_6h_Positive_IPA25pc_noCutoffOfP	chr7	72424695	72424756	chr7:72424695-72424756:mpeak_72449|chr7_72419136_72425302_NSUN5P2_NR_-|	20	-	-
chr7:74317068-74317124:mpeak_1118|chr7_74306886_74335466_PMS2P5_NR_+	+	PMS2P5	HP-Cyto_18h_Positive_IPA25pc_noCutoffOfP	chr7	74317068	74317122	chr7:74317068-74317122:mpeak_71423|chr7_74306886_74335466_PMS2P5_NR_+|	5.57	+	uc003ubl.2:74310332:74321779:+
chr7:77035378-77035434:mpeak_1121|chr7_76940766_77045717_GSAP_NM_-	-	GSAP	HP-Cyto_6h_Positive_IPA25pc_noCutoffOfP	chr7	77035378	77035429	chr7:77035378-77035429:mpeak_72701|chr7_76940766_77045717_GSAP_NM_-|	9.05	-	uc003ugf.3:76940674:77045638:-
chr7:77035378-77035434:mpeak_1121|chr7_76940766_77045717_GSAP_NM_-	-	GSAP	HP-Cyto_UT_Positive_IPA25pc_noCutoffOfP	chr7	77035378	77035434	chr7:77035378-77035434:mpeak_78588|chr7_76940766_77045717_GSAP_NM_-|	9.17	-	uc003ugf.3:76940674:77045638:-
chr7:98015185-98015522:mpeak_1124|chr7_97922908_98030427_BAIAP2L1_NM_-	-	BAIAP2L1	HP-Cyto_18h_Positive_IPA25pc_noCutoffOfP	chr7	98015263	98015522	chr7:98015263-98015522:mpeak_72038|chr7_97922908_98030427_BAIAP2L1_NM_-|	87.15	-	uc003upj.3:97922832:98030164:-
chr8:107705288-107705401:mpeak_1186|chr8_107282405_107763033_OXR1_NM_+	+	OXR1	HP-Cyto_18h_Positive_IPA25pc_noCutoffOfP	chr8	107705288	107705401	chr8:107705288-107705401:mpeak_76081|chr8_107282405_107763033_OXR1_NM_+|	16	+	uc003ymg.1:107630392:107719462:+;uc003ymi.1:107691481:107719372:+;uc022azp.1:107371841:107763169:+;uc003ymf.3:107371841:107763169:+;uc011lht.2:107460250:107763169:+;uc011lhu.2:107670214:107763169:+
chr8:124089609-124089727:mpeak_1191|chr8_124084919_124164045_TBC1D31_NM_+	+	TBC1D31	HP-Cyto_6h_Positive_IPA25pc_noCutoffOfP	chr8	124089609	124089727	chr8:124089609-124089727:mpeak_77508|chr8_124084919_124164045_TBC1D31_NM_+|	7.25	+	uc003ypo.1:124085009:124113265:+;uc003ypp.2:124085009:124164179:+;uc011lig.2:124085009:124164179:+;uc011lih.2:124089487:124164179:+
chr8:124089609-124089727:mpeak_1191|chr8_124084919_124164045_TBC1D31_NM_+	+	TBC1D31	HP-Cyto_UT_Positive_IPA25pc_noCutoffOfP	chr8	124089609	124089720	chr8:124089609-124089720:mpeak_83757|chr8_124084919_124164045_TBC1D31_NM_+|	7.34	+	uc003ypo.1:124085009:124113265:+;uc003ypp.2:124085009:124164179:+;uc011lig.2:124085009:124164179:+;uc011lih.2:124089487:124164179:+
chr8:124113141-124113309:mpeak_1192|chr8_124084919_124164045_TBC1D31_NM_+	+	TBC1D31	HP-Cyto_6h_Positive_IPA25pc_noCutoffOfP	chr8	124113141	124113333	chr8:124113141-124113333:mpeak_77510|chr8_124084919_124164045_TBC1D31_NM_+|	3.27	+	uc003ypp.2:124085009:124164179:+;uc011lig.2:124085009:124164179:+;uc011lih.2:124089487:124164179:+;uc003yps.2:124113076:124164179:+
chr8:124113141-124113309:mpeak_1192|chr8_124084919_124164045_TBC1D31_NM_+	+	TBC1D31	HP-Cyto_UT_Positive_IPA25pc_noCutoffOfP	chr8	124113183	124113309	chr8:124113183-124113309:mpeak_83758|chr8_124084919_124164045_TBC1D31_NM_+|	4.8	+	uc003ypp.2:124085009:124164179:+;uc011lig.2:124085009:124164179:+;uc011lih.2:124089487:124164179:+;uc003yps.2:124113076:124164179:+
chr8:124116389-124116447:mpeak_1193|chr8_124084919_124164045_TBC1D31_NM_+	+	TBC1D31	HP-Cyto_6h_Positive_IPA25pc_noCutoffOfP	chr8	124116372	124116442	chr8:124116372-124116442:mpeak_77513|chr8_124084919_124164045_TBC1D31_NM_+|	3.66	+	uc003ypp.2:124085009:124164179:+;uc011lig.2:124085009:124164179:+;uc011lih.2:124089487:124164179:+;uc003yps.2:124113076:124164179:+
chr8:128955187-128955249:mpeak_1194|chr8_128902873_129113225_PVT1_NR_+	+	PVT1	HP-Cyto_18h_Positive_IPA25pc_noCutoffOfP	chr8	128955081	128955251	chr8:128955081-128955251:mpeak_76567|chr8_128902873_129113225_PVT1_NR_+|	7.61	+	-
chr8:133790098-133790169:mpeak_1198|chr8_133787603_133858025_PHF20L1_NM_+	+	PHF20L1	HP-Cyto_UT_Positive_IPA25pc_noCutoffOfP	chr8	133790098	133790169	chr8:133790098-133790169:mpeak_84091|chr8_133787603_133858025_PHF20L1_NM_+|	21.69	+	uc003ytr.3:133790074:133823379:+;uc010mdv.3:133790074:133823379:+;uc003ytt.3:133790074:133858168:+;uc011lja.2:133790074:133858168:+
chr8:133806740-133806833:mpeak_1199|chr8_133787603_133858025_PHF20L1_NM_+	+	PHF20L1	HP-Cyto_6h_Positive_IPA25pc_noCutoffOfP	chr8	133806740	133806833	chr8:133806740-133806833:mpeak_77792|chr8_133787603_133858025_PHF20L1_NM_+|	29.65	+	uc003ytr.3:133790074:133823379:+;uc010mdv.3:133790074:133823379:+;uc003ytt.3:133790074:133858168:+;uc011lja.2:133790074:133858168:+
chr8:133825381-133825446:mpeak_1201|chr8_133787603_133858025_PHF20L1_NM_+	+	PHF20L1	HP-Cyto_18h_Positive_IPA25pc_noCutoffOfP	chr8	133825381	133825446	chr8:133825381-133825446:mpeak_76642|chr8_133787603_133858025_PHF20L1_NM_+|	40.54	+	uc003ytt.3:133790074:133858168:+;uc011lja.2:133790074:133858168:+;uc031tck.1:133811067:133837365:+
chr8:133825381-133825446:mpeak_1201|chr8_133787603_133858025_PHF20L1_NM_+	+	PHF20L1	HP-Cyto_UT_Positive_IPA25pc_noCutoffOfP	chr8	133825381	133825444	chr8:133825381-133825444:mpeak_84099|chr8_133787603_133858025_PHF20L1_NM_+|	22.67	+	uc003ytt.3:133790074:133858168:+;uc011lja.2:133790074:133858168:+;uc031tck.1:133811067:133837365:+
chr8:133845026-133845088:mpeak_1202|chr8_133787603_133858025_PHF20L1_NM_+	+	PHF20L1	HP-Cyto_6h_Positive_IPA25pc_noCutoffOfP	chr8	133845028	133845078	chr8:133845028-133845078:mpeak_77802|chr8_133787603_133858025_PHF20L1_NM_+|	4.63	+	uc003ytt.3:133790074:133858168:+;uc011lja.2:133790074:133858168:+
chr8:146032458-146032534:mpeak_1208|chr8_146024260_146032575_ZNF517_NM_+	+	ZNF517	HP-Cyto_UT_Positive_IPA25pc_noCutoffOfP	chr8	146032459	146032516	chr8:146032459-146032516:mpeak_84554|chr8_146024260_146032575_ZNF517_NM_+|	8.13	+	uc003zed.1:146028299:146033780:+;uc003zef.1:146028299:146035645:+
chr8:146217341-146217483:mpeak_1211|chr8_146203939_146228285_ZNF252P_NR_-	-	ZNF252P	HP-Cyto_6h_Positive_IPA25pc_noCutoffOfP	chr8	146217343	146217483	chr8:146217343-146217483:mpeak_78216|chr8_146203939_146228285_ZNF252P_NR_-|	61.96	-	uc011llo.2:146202524:146225022:-
chr8:180000-180058:mpeak_1152|chr8_163710_182318_RPL23AP53_NR_-	-	RPL23AP53	HP-Cyto_6h_Positive_IPA25pc_noCutoffOfP	chr8	179981	180058	chr8:179981-180058:mpeak_74774|chr8_163710_182318_RPL23AP53_NR_-|	5.71	-	-
chr8:19218693-19218797:mpeak_1155|chr8_19171080_19252060_SH2D4A_NM_+	+	SH2D4A	HP-Cyto_6h_Positive_IPA25pc_noCutoffOfP	chr8	19218693	19218797	chr8:19218693-19218797:mpeak_75061|chr8_19171080_19252060_SH2D4A_NM_+|	31.86	+	uc003wzb.3:19177058:19252153:+;uc011kym.2:19171288:19252153:+;uc003wzc.3:19177058:19252153:+
chr8:33347795-33347858:mpeak_1158|chr8_33342684_33355949_MAK16_NM_+	+	MAK16	HP-Cyto_6h_Positive_IPA25pc_noCutoffOfP	chr8	33347795	33347855	chr8:33347795-33347855:mpeak_75447|chr8_33342684_33355949_MAK16_NM_+|	15.37	+	uc003xjj.3:33342724:33356147:+
chr8:33347795-33347858:mpeak_1158|chr8_33342684_33355949_MAK16_NM_+	+	MAK16	HP-Cyto_UT_Positive_IPA25pc_noCutoffOfP	chr8	33347795	33347855	chr8:33347795-33347855:mpeak_81626|chr8_33342684_33355949_MAK16_NM_+|	36.57	+	uc003xjj.3:33342724:33356147:+
chr8:38122250-38122341:mpeak_1159|chr8_38122122_38126738_PPAPDC1B_NM_-	-	PPAPDC1B	HP-Cyto_18h_Positive_IPA25pc_noCutoffOfP	chr8	38122253	38122339	chr8:38122253-38122339:mpeak_74521|chr8_38122122_38126738_PPAPDC1B_NM_-|	16.14	-	uc003xle.4:38121961:38126459:-;uc003xlf.4:38121961:38126717:-
chr8:38122250-38122341:mpeak_1159|chr8_38122122_38126738_PPAPDC1B_NM_-	-	PPAPDC1B	HP-Cyto_6h_Positive_IPA25pc_noCutoffOfP	chr8	38122253	38122341	chr8:38122253-38122341:mpeak_75556|chr8_38122122_38126738_PPAPDC1B_NM_-|	43.04	-	uc003xle.4:38121961:38126459:-;uc003xlf.4:38121961:38126717:-
chr8:38122250-38122341:mpeak_1159|chr8_38122122_38126738_PPAPDC1B_NM_-	-	PPAPDC1B	HP-Cyto_UT_Positive_IPA25pc_noCutoffOfP	chr8	38122250	38122341	chr8:38122250-38122341:mpeak_81729|chr8_38122122_38126738_PPAPDC1B_NM_-|	36.12	-	uc003xle.4:38121961:38126459:-;uc003xlf.4:38121961:38126717:-
chr8:62519013-62519125:mpeak_1165|chr8_62416068_62627199_ASPH_NM_-	-	ASPH	HP-Cyto_18h_Positive_IPA25pc_noCutoffOfP	chr8	62519015	62519072	chr8:62519015-62519072:mpeak_75033|chr8_62416068_62627199_ASPH_NM_-|	23.59	-	uc011leg.2:62415917:62602247:-;uc003xuj.3:62415917:62626930:-;uc003xuo.2:62475302:62626930:-
chr8:68071219-68071307:mpeak_1169|chr8_67976602_68107616_CSPP1_NM_+	+	CSPP1	HP-Cyto_UT_Positive_IPA25pc_noCutoffOfP	chr8	68071219	68071301	chr8:68071219-68071301:mpeak_82362|chr8_67976602_68107616_CSPP1_NM_+|	6.43	+	uc003xxj.3:67976633:68107828:+;uc003xxi.3:67976633:68107828:+;uc003xxk.3:68007899:68107828:+
chr8:68097523-68097589:mpeak_1170|chr8_67976602_68107616_CSPP1_NM_+	+	CSPP1	HP-Cyto_UT_Positive_IPA25pc_noCutoffOfP	chr8	68097523	68097589	chr8:68097523-68097589:mpeak_82364|chr8_67976602_68107616_CSPP1_NM_+|	16.23	+	uc010lyw.3:68076645:68107655:+;uc003xxj.3:67976633:68107828:+;uc003xxi.3:67976633:68107828:+;uc003xxk.3:68007899:68107828:+
chr8:68097791-68097856:mpeak_1171|chr8_67976602_68107616_CSPP1_NM_+	+	CSPP1	HP-Cyto_UT_Positive_IPA25pc_noCutoffOfP	chr8	68097791	68097856	chr8:68097791-68097856:mpeak_82365|chr8_67976602_68107616_CSPP1_NM_+|	6.18	+	uc010lyw.3:68076645:68107655:+;uc003xxj.3:67976633:68107828:+;uc003xxi.3:67976633:68107828:+;uc003xxk.3:68007899:68107828:+
chr8:81557021-81557075:mpeak_1175|chr8_81553712_81787016_ZNF704_NM_-	-	ZNF704	HP-Cyto_6h_Positive_IPA25pc_noCutoffOfP	chr8	81557021	81557076	chr8:81557021-81557076:mpeak_76443|chr8_81553712_81787016_ZNF704_NM_-|	13.1	-	uc003yby.2:81553600:81733829:-
chr9:106892001-106892135:mpeak_1243|chr9_106856540_106901419_SMC2_NM_+	+	SMC2	HP-Cyto_18h_Positive_IPA25pc_noCutoffOfP	chr9	106891956	106892129	chr9:106891956-106892129:mpeak_78808|chr9_106856540_106901419_SMC2_NM_+|	53.66	+	uc004bbv.3:106857665:106901596:+;uc004bbw.3:106857665:106901596:+;uc011lvl.2:106857665:106901596:+;uc004bbx.3:106857665:106901596:+
chr9:111752995-111753061:mpeak_1244|chr9_111705151_111775874_CTNNAL1_NM_-	-	CTNNAL1	HP-Cyto_UT_Positive_IPA25pc_noCutoffOfP	chr9	111752994	111753061	chr9:111752994-111753061:mpeak_86676|chr9_111705151_111775874_CTNNAL1_NM_-|	32	-	uc004bdo.1:111705048:111775722:-;uc004bdp.1:111705133:111775722:-
chr9:125652439-125652507:mpeak_1250|chr9_125612101_125667562_RC3H2_NM_-	-	RC3H2	HP-Cyto_6h_Positive_IPA25pc_noCutoffOfP	chr9	125652439	125652505	chr9:125652439-125652505:mpeak_80642|chr9_125612101_125667562_RC3H2_NM_-|	33.38	-	uc010mwc.1:125611905:125659788:-;uc004bnd.1:125613601:125659788:-;uc004bne.4:125616152:125659788:-;uc011lzg.2:125637534:125659788:-
chr9:125652439-125652507:mpeak_1250|chr9_125612101_125667562_RC3H2_NM_-	-	RC3H2	HP-Cyto_UT_Positive_IPA25pc_noCutoffOfP	chr9	125652439	125652503	chr9:125652439-125652503:mpeak_87189|chr9_125612101_125667562_RC3H2_NM_-|	29.69	-	uc010mwc.1:125611905:125659788:-;uc004bnd.1:125613601:125659788:-;uc004bne.4:125616152:125659788:-;uc011lzg.2:125637534:125659788:-
chr9:126163810-126163969:mpeak_1251|chr9_126144904_126692417_DENND1A_NM_-	-	DENND1A	HP-Cyto_6h_Positive_IPA25pc_noCutoffOfP	chr9	126163829	126163924	chr9:126163829-126163924:mpeak_80693|chr9_126144904_126692417_DENND1A_NM_-|	80.39	-	uc011lzl.1:126143710:126414360:-;uc004bny.1:126143710:126414360:-;uc004bnz.1:126143710:126692184:-;uc011lzm.1:126143710:126692203:-
chr9:126329527-126329589:mpeak_1252|chr9_126144904_126692417_DENND1A_NM_-	-	DENND1A	HP-Cyto_6h_Positive_IPA25pc_noCutoffOfP	chr9	126329524	126329589	chr9:126329524-126329589:mpeak_80696|chr9_126144904_126692417_DENND1A_NM_-|	23.13	-	uc011lzl.1:126143710:126414360:-;uc004bny.1:126143710:126414360:-;uc004bnz.1:126143710:126692184:-;uc011lzm.1:126143710:126692203:-;uc004boa.1:126164088:126692184:-;uc004bob.1:126164088:126641271:-;uc004boc.3:126176858:126641271:-
chr9:127814437-127814547:mpeak_1254|chr9_127715232_127905838_SCAI_NM_-	-	SCAI	HP-Cyto_UT_Positive_IPA25pc_noCutoffOfP	chr9	127814437	127814547	chr9:127814437-127814547:mpeak_87333|chr9_127715232_127905838_SCAI_NM_-|	15.87	-	uc004bpd.3:127715085:127905716:-;uc004bpe.3:127715085:127905716:-
chr9:22447668-22447734:mpeak_1223|chr9_22446839_22451062_DMRTA1_NM_+	+	DMRTA1	HP-Cyto_6h_Positive_IPA25pc_noCutoffOfP	chr9	22447668	22447734	chr9:22447668-22447734:mpeak_78584|chr9_22446839_22451062_DMRTA1_NM_+|	4.82	+	uc003zpp.1:22447064:22451910:+
chr9:33988961-33989133:mpeak_1225|chr9_33922597_34048947_UBAP2_NM_-	-	UBAP2	HP-Cyto_6h_Positive_IPA25pc_noCutoffOfP	chr9	33988961	33989133	chr9:33988961-33989133:mpeak_78746|chr9_33922597_34048947_UBAP2_NM_-|	149.64	-	uc011loc.1:33922501:33998847:-;uc011loe.1:33922501:33998847:-;uc003ztq.1:33922501:34017146:-;uc011lof.1:33923377:33998847:-;uc011log.1:33927878:34017143:-;uc003ztr.2:33933489:33998847:-
chr9:33988961-33989133:mpeak_1225|chr9_33922597_34048947_UBAP2_NM_-	-	UBAP2	HP-Cyto_UT_Positive_IPA25pc_noCutoffOfP	chr9	33988961	33989134	chr9:33988961-33989134:mpeak_85168|chr9_33922597_34048947_UBAP2_NM_-|	235.25	-	uc011loc.1:33922501:33998847:-;uc011loe.1:33922501:33998847:-;uc003ztq.1:33922501:34017146:-;uc011lof.1:33923377:33998847:-;uc011log.1:33927878:34017143:-;uc003ztr.2:33933489:33998847:-
chr9:95301544-95301620:mpeak_1232|chr9_95087749_95375300_CENPP_NM_+	+	CENPP	HP-Cyto_18h_Positive_IPA25pc_noCutoffOfP	chr9	95301734	95301812	chr9:95301734-95301812:mpeak_78460|chr9_95087749_95375300_CENPP_NM_+|	21.98	+	uc004arz.3:95088280:95375431:+;uc010mqx.3:95099869:95375431:+
chr9:95301751-95301812:mpeak_1233|chr9_95087749_95375300_CENPP_NM_+	+	CENPP	HP-Cyto_18h_Positive_IPA25pc_noCutoffOfP	chr9	95301734	95301812	chr9:95301734-95301812:mpeak_78460|chr9_95087749_95375300_CENPP_NM_+|	21.98	+	uc004arz.3:95088280:95375431:+;uc010mqx.3:95099869:95375431:+
chr9:98680792-98680855:mpeak_1237|chr9_98637899_98774506_ERCC6L2_NM_+	+	ERCC6L2	HP-Cyto_6h_Positive_IPA25pc_noCutoffOfP	chr9	98680792	98680855	chr9:98680792-98680855:mpeak_79719|chr9_98637899_98774506_ERCC6L2_NM_+|	12.35	+	uc004avt.4:98638287:98729002:+;uc011lum.2:98678022:98729002:+;uc010mry.1:98678022:98735369:+;uc010mrz.3:98668932:98729002:+
chr9:98740444-98740501:mpeak_1238|chr9_98637899_98774506_ERCC6L2_NM_+	+	ERCC6L2	HP-Cyto_6h_Positive_IPA25pc_noCutoffOfP	chr9	98740444	98740501	chr9:98740444-98740501:mpeak_79723|chr9_98637899_98774506_ERCC6L2_NM_+|	11.73	+	uc004avu.3:98732884:98767020:+;uc010msa.2:98735090:98775485:+;uc011lun.1:98735090:98801212:+
chrX:100603021-100603086:mpeak_1274|chrX_100601648_100603957_TIMM8A_NM_-	-	TIMM8A	HP-Cyto_6h_Positive_IPA25pc_noCutoffOfP	chrX	100603021	100603087	chrX:100603021-100603087:mpeak_83131|chrX_100601648_100603957_TIMM8A_NM_-|	21.87	-	uc004ehd.2:100601486:100603652:-
chrX:122735840-122736003:mpeak_1278|chrX_122735189_122866904_THOC2_NM_-	-	THOC2	HP-Cyto_6h_Positive_IPA25pc_noCutoffOfP	chrX	122735840	122736003	chrX:122735840-122736003:mpeak_83501|chrX_122735189_122866904_THOC2_NM_-|	10.95	-	-
chrX:3527890-3527970:mpeak_1262|chrX_3526986_3631675_PRKX_NM_-	-	PRKX	HP-Cyto_6h_Positive_IPA25pc_noCutoffOfP	chrX	3527815	3527968	chrX:3527815-3527968:mpeak_81650|chrX_3526986_3631675_PRKX_NM_-|	164.41	-	-
chrX:3527890-3527970:mpeak_1262|chrX_3526986_3631675_PRKX_NM_-	-	PRKX	HP-Cyto_UT_Positive_IPA25pc_noCutoffOfP	chrX	3527907	3527970	chrX:3527907-3527970:mpeak_88340|chrX_3526986_3631675_PRKX_NM_-|	198.51	-	-
chrX:41534060-41534154:mpeak_1265|chrX_41379849_41782287_CASK_NM_-	-	CASK	HP-Cyto_18h_Positive_IPA25pc_noCutoffOfP	chrX	41533928	41533980	chrX:41533928-41533980:mpeak_80865|chrX_41379849_41782287_CASK_NM_-|	208.78	-	uc004dfl.4:41379672:41782241:-;uc004dfm.4:41379672:41782241:-;uc004dfn.4:41379672:41782241:-
chrX:47720384-47720456:mpeak_1268|chrX_47696300_47774322_ZNF81_NM_+	+	ZNF81	HP-Cyto_UT_Positive_IPA25pc_noCutoffOfP	chrX	47720389	47720456	chrX:47720389-47720456:mpeak_89012|chrX_47696300_47774322_ZNF81_NM_+|	4.72	+	uc022bvq.1:47705666:47776031:+;uc010nhy.2:47705666:47776031:+
chrX:53430721-53430831:mpeak_1269|chrX_53407107_53449677_SMC1A_NM_-	-	SMC1A	HP-Cyto_18h_Positive_IPA25pc_noCutoffOfP	chrX	53430487	53430601	chrX:53430487-53430601:mpeak_81152|chrX_53407107_53449677_SMC1A_NM_-|	132.02	-	uc004dsg.3:53407023:53449549:-;uc011moe.2:53407023:53448887:-
chrX:53430721-53430831:mpeak_1269|chrX_53407107_53449677_SMC1A_NM_-	-	SMC1A	HP-Cyto_6h_Positive_IPA25pc_noCutoffOfP	chrX	53430487	53430607	chrX:53430487-53430607:mpeak_82467|chrX_53407107_53449677_SMC1A_NM_-|	211.49	-	uc004dsg.3:53407023:53449549:-;uc011moe.2:53407023:53448887:-
chrX:67290804-67290854:mpeak_1270|chrX_67267005_67653299_OPHN1_NM_-	-	OPHN1	HP-Cyto_6h_Positive_IPA25pc_noCutoffOfP	chrX	67290804	67290854	chrX:67290804-67290854:mpeak_82680|chrX_67267005_67653299_OPHN1_NM_-|	5.37	-	uc004dww.4:67268265:67652862:-;uc011mpg.2:67268265:67652862:-
chrX:67290804-67290854:mpeak_1270|chrX_67267005_67653299_OPHN1_NM_-	-	OPHN1	HP-Cyto_UT_Positive_IPA25pc_noCutoffOfP	chrX	67290804	67290854	chrX:67290804-67290854:mpeak_89419|chrX_67267005_67653299_OPHN1_NM_-|	5.44	-	uc004dww.4:67268265:67652862:-;uc011mpg.2:67268265:67652862:-
chrX:76909575-76909702:mpeak_1273|chrX_76764107_77041755_ATRX_NM_-	-	ATRX	HP-Cyto_18h_Positive_IPA25pc_noCutoffOfP	chrX	76909576	76909697	chrX:76909576-76909697:mpeak_81662|chrX_76764107_77041755_ATRX_NM_-|	125.15	-	uc004ecp.4:76763828:77041487:-;uc004ecq.4:76763828:77041487:-;uc004eco.4:76763828:76940447:-
