# Supplementary material for: Compartment-specific and ELAVL1-coordinated regulation of intronic polyadenylation isoforms by doxorubicin
Source: HighWire-hosted journal article supplement (doi:10.1101/gr.276192.121), 2022-07-01
Supplement: Supplemental_Table_S15.xlsx.xlsx [file Supplemental_Table_S15.xlsx.xlsx]

## Sheet: Sheet1
Supplemental Table S15 : List of IPA isoforms regulated by ELAVL1 depletion in whole MCF-7 cells by 3’-seq analysis.
IPA peaks	baseMean	log2FoldChange IPA:LE	lfcSE	stat	pvalue	padj	46	58	70	44	56	68	LE,46	LE,58	LE,70	LE,44	LE,56	LE,68	%IPA (siELAVL1)	%IPA (siCTL)	log2FC_IPA	log2FC_LE	log2FC IPA-logFC LE	gene	Tian polyA site	Zavolan polyA site
chrX:3739787-3740092:mpeak_210396|chrX_3735819_3761935_LOC389906_NR_-|	19.2087	-2.08186	1.01119	-2.05882	0.0395117	0.413002	2.77719	1.05759	3.0921	6.25683	4.22377	4.42386	36.1035	53.937	49.4735	27.5301	20.0629	21.5663	4.965	21.5509	-1.10547	1.01242	-2.11788	LOC389906	chrX:3739840:-	-
chrX:153632685-153632752:mpeak_215189|chrX_153631182_153640428_DNASE1L1_NM_-|	36.623	-4.42134	1.80307	-2.45211	0.014202	0.293828	0	0	0	0	0	10.5067	65.264	67.6857	85.8057	88.847	52.7971	68.5698	#DIV/0!	14.9942	-Inf	0.0574601	-Inf	DNASE1L1	chrX:153632683:-	-
chrX:14881098-14881229:mpeak_210711|chrX_14862103_14891184_FANCB_NM_-|	8.95438	-4.06999	1.87395	-2.17187	0.0298652	0.37025	0	0	0	5.00546	0	10.5067	9.72018	10.5759	13.9144	31.2841	13.7273	12.7186	#DIV/0!	40.3052	-Inf	-0.754882	-Inf	FANCB	chrX:14881102:-;chrX:14881175:-	chrX_14862981_-;chrX_14863040_-
chrX:129056989-129057045:mpeak_214457|chrX_129040096_129063311_UTP14A_NM_+|	30.515	-4.55558	1.76518	-2.5808	0.00985728	0.280654	0	0	0	5.00546	0	12.1656	34.7149	40.1884	74.9833	60.0656	29.5664	109.49	#DIV/0!	12.9351	-Inf	-0.409784	-Inf	UTP14A	chrX:129057045:+	chrX_129923069_+
chr9:98638674-98638745:mpeak_205763|chr9_98637899_98774506_ERCC6L2_NM_+|	42.7425	-4.79017	1.8274	-2.6213	0.00875944	0.275065	0	0	0	0	0	12.7186	79.15	95.183	91.2168	91.3497	80.2517	63.04	#DIV/0!	16.2613	-Inf	0.178525	-Inf	ERCC6L2	chr9:98638677:+;chr9:98638747:+	-
chr9:5769402-5769462:mpeak_201795|chr9_5629118_5773957_RIC1_NM_+|	20.904	-4.01611	1.74533	-2.30106	0.0213883	0.329293	0	1.05759	0	0	1.05594	11.6126	34.7149	51.8218	47.1545	31.2841	29.5664	42.5796	2.3732	18.3726	-3.5824	0.370247	-3.95265	RIC1	chr9:5769454:+	chr9_5769452_+
chr9:127669121-127669215:mpeak_208421|chr9_127642889_127703386_GOLGA1_NM_-|	35.7424	-3.36357	1.40054	-2.40163	0.0163221	0.305037	0	0	3.0921	3.7541	0	12.1656	77.7614	107.874	97.401	42.5464	41.1818	43.1326	3.27742	18.8234	-2.36416	1.15774	-3.5219	GOLGA1	chr9:127669120:-;chr9:127669164:-	chr9_124906881_-
chr9:123761941-123762007:mpeak_207811|chr9_123715146_123812554_C5_NM_-|	4.59859	-4.13079	1.9872	-2.0787	0.0376448	0.405476	0	0	0	2.50273	3.16783	7.18877	6.94298	7.40312	3.86512	5.00546	16.8951	2.21193	#DIV/0!	53.3306	-Inf	-0.404952	-Inf	C5	chr9:123761940:-	-
chr9:117265774-117265905:mpeak_207552|chr9_117165216_117267736_DFNB31_NM_-|	27.097	-3.77191	1.57374	-2.39679	0.0165396	0.305514	0	0	0.773024	6.25683	2.11189	4.97684	74.9842	63.4553	27.8289	40.0437	77.0838	27.6491	1.39478	9.21803	-4.1097	0.199685	-4.30939	DFNB31	chr9:117265830:-	chr9_114503493_-;chr9_114503551_-
chr9:115967540-115967590:mpeak_207337|chr9_115928435_115983641_FKBP15_NM_-|	16.4428	-3.39287	1.56797	-2.16386	0.030475	0.37325	1.3886	0	0	5.00546	2.11189	9.95368	15.2746	25.3821	30.1479	32.5355	28.5105	47.0035	5.8835	15.7993	-3.61985	-0.609777	-3.01007	FKBP15	chr9:115967539:-	chr9_113205259_-
chr8:80870187-80870275:mpeak_195531|chr8_80831383_80942506_MRPS28_NM_-|	42.7189	-3.48014	1.63957	-2.12259	0.0337884	0.387244	0	3.17277	0	1.25137	3.16783	27.0961	40.2693	46.5339	160.016	78.8361	53.8531	98.4308	3.85638	13.6359	-3.31224	0.0948124	-3.40705	MRPS28	chr8:80870219:-	chr8_79957985_-
chr8:74461816-74461898:mpeak_195256|chr8_74333700_74659943_STAU2_NM_-|	28.004	-1.74067	0.845523	-2.05869	0.0395237	0.41303	6.94298	11.6335	12.3684	23.776	20.0629	11.6126	62.4868	64.5129	37.1052	28.7814	39.0699	17.6954	18.8567	64.8201	-0.841528	0.939834	-1.78136	STAU2	chr8:74461836:-	chr8_73549586_-;chr8_73549618_-
chr8:53567830-53567881:mpeak_194112|chr8_53536419_53627026_RB1CC1_NM_-|	25.0684	-4.41421	1.76838	-2.49619	0.0125534	0.290421	0	0	0	0	1.05594	9.4007	31.9377	33.8428	82.7136	47.5519	40.1258	54.1923	#DIV/0!	11.0559	-Inf	0.0658363	-Inf	RB1CC1	chr8:53567831:-	chr8_52655271_-
chr8:38122247-38122341:mpeak_193391|chr8_38122122_38126738_PPAPDC1B_NM_-|	51.796	-1.89684	0.74942	-2.53108	0.0113712	0.288014	4.16579	5.28794	8.50326	11.2623	11.6154	11.0596	140.248	99.4133	143.782	58.8142	53.8531	73.5466	4.68308	18.2249	-0.918326	1.04206	-1.96038	PPAPDC1B	chr8:38122257:-	chr8_38264742_-
chr8:38105142-38105192:mpeak_193379|chr8_38089008_38118117_DDHD2_NM_+|	13.7515	-4.23238	1.99841	-2.11788	0.0341856	0.387987	1.3886	0	0	0	2.11189	10.5067	16.6632	10.5759	64.934	18.7705	6.33566	33.7319	4.51953	32.1693	-3.18385	0.647595	-3.83144	DDHD2	chr8:38105195:+	chr8_38247687_+
chr8:183529-183579:mpeak_191510|chr8_182136_195153_ZNF596_NM_+|	6.7784	-4.22343	1.77908	-2.37394	0.0175995	0.31089	0	0	0	1.25137	4.22377	6.0828	13.886	12.6911	6.18419	18.7705	11.6154	6.63579	#DIV/0!	31.2194	-Inf	-0.17638	-Inf	ZNF596	chr8:183577:+	chr8_233575_+
chr8:17529417-17529474:mpeak_192161|chr8_17503648_17658426_MTUS1_NM_-|	54.3412	-2.44621	1.19154	-2.05298	0.0400747	0.415976	0	4.23035	0	6.25683	4.22377	6.63579	141.637	131.141	84.2596	136.399	89.7551	47.5565	3.55455	6.25346	-2.01653	0.383424	-2.39995	MTUS1	chr8:17529419:-	-
chr8:146217345-146217476:mpeak_201400|chr8_146203939_146228285_ZNF252P_NR_-|	65.7136	-3.04532	1.39609	-2.18132	0.0291595	0.366525	1.3886	0	0.773024	5.00546	0	9.4007	126.362	131.141	144.555	146.41	90.8111	132.716	0.806457	5.84134	-2.7365	0.120128	-2.85663	ZNF252P	chr8:146217344:-;chr8:146217425:-	chr8_144991959_-;chr8_144992040_-
chr8:146216813-146216863:mpeak_201399|chr8_146203939_146228285_ZNF252P_NR_-|	65.1163	-4.35835	1.72103	-2.53241	0.0113282	0.288014	0	0	0	0	0	9.4007	126.362	131.141	144.555	146.41	90.8111	132.716	#DIV/0!	7.62349	-Inf	0.120128	-Inf	ZNF252P	chr8:146216801:-	-
chr8:141887870-141888023:mpeak_200794|chr8_141669777_142011412_PTK2_NM_-|	128.849	-2.47627	0.859947	-2.87956	0.00398232	0.267856	1.3886	4.23035	3.86512	7.5082	15.8391	25.9902	266.611	215.748	290.657	232.754	199.573	282.021	1.22689	6.90665	-2.37911	0.11387	-2.49298	PTK2	chr8:141887970:-	chr8_140877874_-
chr8:124113134-124113340:mpeak_199307|chr8_124084919_124164045_TBC1D31_NM_+|	6.97073	-3.48764	1.76309	-1.97814	0.0479132	0.448287	2.77719	3.17277	0	7.5082	5.27971	13.2716	4.16579	3.17277	29.3749	1.25137	3.16783	10.5067	24.3097	174.593	-2.13086	1.2985	-3.42935	TBC1D31	chr8:124113330:+	chr8_123101023_+;chr8_123101100_+
chr7:99095639-99095770:mpeak_186853|chr7_99092254_99097877_ZNF394_NM_-|	26.4953	-3.13176	1.4479	-2.16296	0.0305439	0.373377	1.3886	1.05759	0	5.00546	0	9.4007	52.7667	49.7067	61.8419	51.306	40.1258	45.3445	2.23307	15.799	-2.55808	0.264647	-2.82273	ZNF394	chr7:99095637:-;chr7:99095718:-	chr7_99498015_-;chr7_99498097_-
chr7:97601174-97601224:mpeak_186648|chr7_97596289_97601638_MGC72080_NR_-|	42.3254	-4.27005	1.54206	-2.76906	0.00562176	0.267856	0	0	0	3.7541	0	6.63579	98.5903	71.916	76.5294	101.361	62.3006	86.8182	#DIV/0!	6.222	-Inf	-0.0199727	-Inf	MGC72080	chr7:97601221:-	chr7_97971910_-
chr7:66775203-66775263:mpeak_184807|chr7_66767624_66785089_STAG3L4_NR_+|	40.5694	-4.01729	1.64828	-2.43727	0.0147988	0.295783	0	0	0	0	1.05594	7.74175	77.7614	79.3191	71.1182	122.634	69.6922	57.5102	#DIV/0!	5.28208	-Inf	-0.130692	-Inf	STAG3L4	chr7:66775261:+	chr7_67310284_+
chr7:35732554-35732641:mpeak_183219|chr7_35673461_35734772_HERPUD2_NM_-|	96.1953	-4.42012	1.79389	-2.46398	0.0137403	0.293236	0	0	0	0	0	12.7186	158.3	156.523	217.22	183.951	155.224	270.408	#DIV/0!	6.25933	-Inf	-0.19628	-Inf	HERPUD2	chr7:35732560:-	-
chr7:158312601-158312738:mpeak_191398|chr7_157333479_158380494_PTPRN2_NM_-|	7.17794	-4.56684	2.13927	-2.13476	0.0327804	0.383353	0	5.28794	0	0	2.11189	7.18877	22.2175	22.2094	21.6447	1.25137	4.22377	0	24.0101	169.871	-0.814626	3.59306	-4.40769	PTPRN2	chr7:158312692:-	chr7_158520000_-
chr7:156624980-156625030:mpeak_191239|chr7_156476857_156685902_LMBR1_NM_-|	44.7065	-3.46744	1.61423	-2.14805	0.03171	0.377925	0	2.11518	0	1.25137	0	9.95368	90.2588	76.1464	172.384	66.3224	41.1818	76.8645	1.873	9.11628	-2.4053	0.877795	-3.28309	LMBR1	chr7:156624977:-	chr7_156832270_-
chr7:151057578-151057628:mpeak_190817|chr7_151038846_151074132_NUB1_NM_+|	44.648	-3.8314	1.75569	-2.18228	0.0290891	0.366313	0	0	0	0	0	9.95368	69.4298	66.6281	84.2596	96.3552	90.8111	118.338	#DIV/0!	9.77434	-Inf	-0.471609	-Inf	NUB1	chr7:151057630:+	chr7_151360542_+
chr7:100959460-100959510:mpeak_187179|chr7_100958563_100965104_IFT22_NM_-|	70.4137	-4.74225	1.75007	-2.70976	0.00673326	0.269946	0	0	0	0	0	11.0596	134.694	137.486	187.845	120.131	129.881	123.868	#DIV/0!	8.87422	-Inf	0.299137	-Inf	IFT22	chr7:100959438:-	chr7_101316157_-
chr6:88322736-88322786:mpeak_175272|chr6_88299784_88376735_ORC3_NM_+|	11.3327	-3.81155	1.6976	-2.24526	0.0247516	0.34653	0	0	0	1.25137	3.16783	6.63579	12.4974	9.5183	28.6019	20.0219	21.1189	33.1789	#DIV/0!	14.8749	-Inf	-0.554106	-Inf	ORC3	chr6:88322788:+	chr6_87613068_+
chr6:88238656-88238706:mpeak_175238|chr6_88224217_88299735_RARS2_NM_-|	53.6863	-3.84087	1.84428	-2.08259	0.037289	0.40316	0	0	0	0	0	9.95368	65.264	62.3977	141.463	100.109	78.1398	186.908	#DIV/0!	8.17759	-Inf	-0.44024	-Inf	RARS2	chr6:88238660:-	-
chr6:84651347-84651398:mpeak_174970|chr6_84569369_84669542_CYB5R4_NM_+|	29.3297	-3.71472	1.78022	-2.08666	0.0369191	0.401428	1.3886	0	0	0	1.05594	13.2716	34.7149	65.5705	62.6149	47.5519	41.1818	84.6063	2.55726	12.3983	-3.36709	-0.0896147	-3.27747	CYB5R4	chr6:84651399:+	chr6_83941678_+
chr6:83720618-83720668:mpeak_174811|chr6_83602761_83775560_UBE3D_NM_-|	12.3351	-4.36321	1.83438	-2.37857	0.0173797	0.30944	0	0	0	1.25137	1.05594	7.74175	8.33158	16.9214	46.3814	17.5191	20.0629	28.7551	#DIV/0!	15.1485	-Inf	0.110837	-Inf	UBE3D	chr6:83720653:-	chr6_83010937_-
chr6:71277167-71277307:mpeak_174130|chr6_71276624_71298317_SDHAF4_NM_+|	27.9406	-2.88401	1.14095	-2.52772	0.0114804	0.288014	4.16579	5.28794	0	11.2623	5.27971	16.0365	36.1035	62.3977	95.855	32.5355	23.2307	43.1326	7.29619	32.9412	-1.78496	0.974677	-2.75964	SDHAF4	chr6:71277308:+	chr6_70567604_+
chr6:34976516-34976566:mpeak_172112|chr6_34857037_35056382_ANKS1A_NM_+|	26.4737	-4.2755	1.95167	-2.19068	0.0284747	0.3645	0	0	0	0	0	9.95368	33.3263	31.7277	89.6708	30.0328	42.2377	80.7354	#DIV/0!	19.5163	-Inf	0.0161167	-Inf	ANKS1A	chr6:34976570:+	-
chr6:151710733-151710795:mpeak_179280|chr6_151688027_151712835_ZBTB2_NM_-|	47.7989	-4.43601	1.78689	-2.48254	0.0130451	0.29152	0	0	0	0	0	9.4007	76.3728	78.2615	148.421	102.612	62.3006	96.2189	#DIV/0!	10.8	-Inf	0.214803	-Inf	ZBTB2	chr6:151710710:-	chr6_151389577_-
chr6:143489195-143489246:mpeak_178501|chr6_143380499_143660775_AIG1_NM_+|	58.7983	-4.62241	1.63283	-2.83093	0.00464136	0.267856	0	0	0	0	1.05594	9.95368	104.145	121.623	142.236	97.6065	104.538	124.421	#DIV/0!	5.057	-Inf	0.172347	-Inf	AIG1	chr6:143489248:+	-
chr6:13424708-13424758:mpeak_169797|chr6_13365894_13487869_GFOD1_NM_-|	34.7408	-3.97384	1.96331	-2.02405	0.0429652	0.428988	0	0	0	0	0	12.7186	52.7667	42.3035	64.934	60.0656	35.9021	148.199	#DIV/0!	15.6269	-Inf	-0.609757	-Inf	GFOD1	chr6:13424707:-	chr6_13424476_-
chr5:79772596-79772687:mpeak_161764|chr5_79703831_79773037_ZFYVE16_NM_+|	40.9613	-5.28598	1.90629	-2.77291	0.00555569	0.267856	0	0	0	1.25137	0	17.6954	56.9325	58.1674	134.506	42.5464	54.909	125.527	#DIV/0!	12.7455	-Inf	0.162722	-Inf	ZFYVE16	chr5:79772686:+	-
chr5:77888802-77888853:mpeak_161514|chr5_77784976_77944648_LHFPL2_NM_-|	62.7599	-4.36192	1.71576	-2.54227	0.0110135	0.286729	0	0	0	0	0	9.4007	154.134	123.738	109.769	132.645	116.154	107.279	#DIV/0!	7.92022	-Inf	0.122533	-Inf	LHFPL2	chr5:77888801:-	chr5_78592981_-
chr5:76327391-76327441:mpeak_161284|chr5_76326209_76358876_AGGF1_NM_+|	144.332	-5.08818	1.79759	-2.83056	0.00464668	0.267856	0	0	0	0	0	13.2716	445.739	299.298	237.318	305.333	228.084	202.944	#DIV/0!	5.40695	-Inf	0.415831	-Inf	AGGF1	chr5:76327438:+	-
chr5:60648192-60648245:mpeak_159856|chr5_60628099_60839281_ZSWIM6_NM_+|	57.4697	-5.81418	2.02901	-2.86553	0.00416315	0.267856	0	0	0	0	0	22.1193	105.533	90.9526	192.483	73.8306	55.965	148.752	#DIV/0!	23.8228	-Inf	0.48173	-Inf	ZSWIM6	chr5:60648267:+	-
chr5:137284110-137284173:mpeak_165651|chr5_137276037_137368802_FAM13B_NM_-|	22.0911	-2.23573	1.01695	-2.19846	0.0279167	0.363243	2.77719	4.23035	2.31907	5.00546	8.44754	7.74175	59.7096	31.7277	64.934	30.0328	33.7902	14.3775	5.9644	27.1031	-1.18428	0.999726	-2.18401	FAM13B	chr5:137284071:-	-
chr5:116814949-116815073:mpeak_164085|chr5_116751207_116912942_LINC00992_NR_+|	10.6827	-5.38275	1.94231	-2.77132	0.00558292	0.267856	9.72018	17.979	28.6019	3.7541	3.16783	41.4737	5.55439	6.34553	11.5954	0	0	0	239.627	#DIV/0!	0.218287	Inf	-Inf	LINC00992	chr5:116815063:+	chr5_117479304_+;chr5_117479380_+
chr5:116814777-116814838:mpeak_164084|chr5_116751207_116912942_LINC00992_NR_+|	19.919	-4.45616	1.69487	-2.6292	0.00855868	0.273381	20.8289	37.0156	90.4438	16.2678	9.50349	41.4737	5.55439	6.34553	11.5954	0	0	0	631.141	#DIV/0!	1.14091	Inf	-Inf	LINC00992	chr5:116814835:+	chr5_117479154_+
chr5:111500974-111501024:mpeak_163622|chr5_111500815_111755010_EPB41L4A_NM_-|	29.1548	-3.74301	1.63994	-2.28241	0.0224654	0.334356	0	0	0	0	1.05594	7.74175	48.6009	54.9946	43.2893	55.0601	63.3566	75.7586	#DIV/0!	6.7962	-Inf	-0.402674	-Inf	EPB41L4A	chr5:111500987:-	chr5_112165279_-
chr5:1011290-1011340:mpeak_157161|chr5_1009076_1037919_NKD2_NM_+|	6.66834	-6.29598	2.11502	-2.9768	0.00291277	0.267856	0	0	0	2.50273	3.16783	9.4007	13.886	11.6335	22.4177	7.5082	9.50349	0	#DIV/0!	59.0624	-Inf	1.49462	-Inf	NKD2	chr5:1011344:+	chr5_1011225_+
chr5:100184765-100184815:mpeak_162870|chr5_100147833_100238989_ST8SIA4_NM_-|	23.1259	-4.90975	1.94496	-2.52435	0.0115912	0.288104	0	0	0	0	0	13.8246	43.0465	34.9004	63.388	38.7923	33.7902	49.7684	#DIV/0!	33.8973	-Inf	0.208093	-Inf	ST8SIA4	chr5:100184764:-	chr5_100849061_-
chr4:75938943-75938993:mpeak_150304|chr4_75858284_75971372_PARM1_NM_+|	47.076	-5.91699	1.91647	-3.08744	0.00201888	0.267856	0	0	0	2.50273	0	26.5431	104.145	59.225	123.684	90.0984	34.8461	123.868	#DIV/0!	17.5107	-Inf	0.206261	-Inf	PARM1	chr4:75938994:+	chr4_75013783_+
chr4:183837069-183837119:mpeak_156648|chr4_183812630_183838630_DCTD_NM_-|	57.6984	-3.58796	1.80104	-1.99216	0.0463536	0.441176	1.3886	0	0	1.25137	0	9.95368	55.5439	82.4919	217.22	77.5847	63.3566	183.59	1.17262	5.17903	-3.01245	0.130499	-3.14295	DCTD	chr4:183837068:-	chr4_182915915_-
chr4:141591545-141591596:mpeak_154448|chr4_141544071_141677471_TBC1D9_NM_-|	104.529	-4.761	1.92373	-2.47488	0.0133282	0.292363	0	0	0	0	0	13.8246	130.528	144.89	357.137	136.399	130.937	340.637	#DIV/0!	6.82163	-Inf	0.0571835	-Inf	TBC1D9	chr4:141591542:-	chr4_140670398_-
chr4:113306939-113307065:mpeak_153195|chr4_113218498_113362358_ALPK1_NM_+|	15.5365	-3.02722	1.48481	-2.03879	0.0414708	0.42141	2.77719	0	0	3.7541	4.22377	10.5067	13.886	23.2669	41.7433	21.2732	28.5105	36.4968	10.5602	21.4238	-2.73462	-0.129079	-2.60554	ALPK1	chr4:113307071:+	chr4_112385833_+
chr3:66020293-66020354:mpeak_136837|chr3_65342807_66024509_MAGI1_NM_-|	48.5035	-3.28722	1.17251	-2.80357	0.0050541	0.267856	2.77719	2.11518	0	7.5082	3.16783	15.4835	97.2018	97.2981	139.917	48.8033	65.4685	102.302	2.19443	12.0788	-2.41873	0.626793	-3.04552	MAGI1	chr3:66020292:-	chr3_66034627_-
chr3:33607876-33607926:mpeak_133894|chr3_33540209_33759705_CLASP2_NM_-|	37.634	-4.5187	1.88675	-2.39497	0.0166219	0.306117	0	0	0	1.25137	0	7.74175	45.8237	41.2459	166.2	31.2841	36.958	121.103	#DIV/0!	7.12438	-Inf	0.419656	-Inf	CLASP2	chr3:33607874:-	chr3_33566384_-
chr3:31724539-31724589:mpeak_133644|chr3_31703608_32023342_OSBPL10_NM_-|	42.895	-3.48039	1.67377	-2.07937	0.0375833	0.405093	1.3886	0	0	1.25137	0	11.0596	63.8754	78.2615	96.628	82.5902	70.7482	108.938	1.74472	7.04088	-3.14825	-0.135494	-3.01276	OSBPL10	chr3:31724537:-	chr3_31683047_-
chr3:155563421-155563471:mpeak_142686|chr3_155546166_155572248_SLC33A1_NM_-|	57.4569	-4.88517	1.59087	-3.07076	0.00213513	0.267856	0	0	0	0	4.22377	8.84772	83.3158	96.2405	187.845	110.12	73.916	124.974	#DIV/0!	6.34517	-Inf	0.249702	-Inf	SLC33A1	chr3:155563419:-	chr3_155845632_-
chr3:136320788-136320838:mpeak_141094|chr3_136057119_136471245_STAG1_NM_-|	19.5887	-3.7633	1.82611	-2.06083	0.0393191	0.412293	1.3886	0	0	1.25137	0	7.74175	29.1605	28.5549	78.0754	32.5355	12.6713	43.6856	3.0678	15.1753	-2.69519	0.611254	-3.30645	STAG1	chr3:136320784:-	chr3_136601925_-
chr3:11373006-11373056:mpeak_132191|chr3_11314009_11596284_ATG7_NM_+|	41.2606	-2.77425	1.38062	-2.00942	0.0444923	0.434316	2.77719	0	0	3.7541	2.11189	6.0828	94.4246	93.0678	70.3452	116.377	58.0769	48.1095	3.23133	5.36871	-2.10517	0.212246	-2.31741	ATG7	chr3:11373058:+	chr3_11331582_+
chr22:46772574-46772624:mpeak_131217|chr22_46759084_46933067_CELSR1_NM_-|	21.9685	-5.20301	1.97817	-2.63021	0.00853318	0.273381	0	0	0	0	0	9.95368	27.7719	34.9004	104.358	20.0219	29.5664	37.0498	#DIV/0!	34.4664	-Inf	0.947039	-Inf	CELSR1	chr22:46772572:-	chr22_46376676_-
chr21:44121252-44121305:mpeak_127623|chr21_44073861_44195389_PDE9A_NM_+|	10.8826	-6.13519	2.39303	-2.56377	0.0103542	0.283679	0	0	0	0	1.05594	24.8842	9.72018	16.9214	36.3321	1.25137	33.7902	6.63579	#DIV/0!	93.3606	-Inf	0.595487	-Inf	PDE9A	chr21:44121303:+	chr21_42701207_+
chr20:9414339-9414389:mpeak_121063|chr20_9049700_9459567_PLCB4_NM_+|	16.9887	-4.25926	1.71695	-2.48072	0.0131118	0.29175	0	0	0	1.25137	1.05594	8.29473	20.8289	27.4973	45.6084	26.2787	22.1748	50.8744	#DIV/0!	10.6738	-Inf	-0.0805407	-Inf	PLCB4	chr20:9414402:+	chr20_9433742_+
chr20:44482056-44482185:mpeak_123447|chr20_44470595_44486048_ACOT8_NM_-|	47.645	-2.41712	0.949167	-2.54657	0.0108789	0.286712	6.94298	10.5759	4.63814	21.2732	6.33566	32.073	72.207	95.183	154.605	72.5792	53.8531	41.4737	6.88117	35.5448	-1.42953	0.939384	-2.36891	ACOT8	chr20:44482059:-	chr20_45853419_-
chr20:441898-441948:mpeak_120283|chr20_416614_443197_TBC1D20_NR_-mpeak_120283|chr20_419485_443197_TBC1D20_NM_-||	37.9966	-4.72621	1.96378	-2.40669	0.0160979	0.302333	0	0	0	0	0	10.5067	45.8237	49.7067	157.697	40.0437	44.3496	107.832	#DIV/0!	16.3975	-Inf	0.397638	-Inf	TBC1D20	chr20:441880:-	chr20_461187_-;chr20_461229_-
chr20:37060590-37060640:mpeak_122843|chr20_37049547_37064018_SNHG17_NR_-|	38.7287	-3.78122	1.81452	-2.08387	0.0371719	0.402802	0	0	0	0	0	8.29473	68.0412	40.1884	98.9471	77.5847	52.7971	118.891	#DIV/0!	9.98271	-Inf	-0.266865	-Inf	SNHG17	chr20:37060588:-	-
chr20:33077687-33077738:mpeak_122376|chr20_32951040_33095499_ITCH_NM_+|	46.3185	-2.77611	1.29133	-2.14982	0.0315698	0.377618	6.94298	3.17277	0	6.25683	3.16783	29.861	80.5386	70.8584	157.697	70.0765	57.0209	70.2287	4.90906	19.909	-1.9574	0.647463	-2.60486	ITCH	chr20:33077738:+	-
chr20:13564990-13565041:mpeak_121226|chr20_13371099_13619583_TASP1_NM_-|	15.9802	-3.73287	1.65314	-2.25804	0.0239429	0.34238	0	1.05759	0	6.25683	1.05594	8.29473	23.6061	15.8638	44.8354	23.776	21.1189	45.8975	3.76342	17.1903	-3.88339	-0.106946	-3.77644	TASP1	chr20:13564990:-	chr20_13584344_-
chr2:73957395-73957445:mpeak_108525|chr2_73957156_73964517_TPRKB_NM_-|	54.8786	-4.07962	1.63461	-2.49577	0.0125682	0.290421	0	0	0.773024	2.50273	4.22377	12.7186	73.5956	43.3611	189.391	133.896	55.965	142.116	0.757007	5.85735	-4.65275	-0.115916	-4.53683	TPRKB	chr2:73957387:-	chr2_73730261_-
chr2:73247216-73247266:mpeak_108448|chr2_73172228_73298965_SFXN5_NM_-|	20.4033	-4.1684	1.78244	-2.33859	0.0193568	0.316393	0	0	0	1.25137	1.05594	8.84772	26.3833	16.9214	64.161	38.7923	22.1748	65.2519	#DIV/0!	8.83783	-Inf	-0.232053	-Inf	SFXN5	chr2:73247215:-	chr2_73020082_-
chr2:61248138-61248188:mpeak_107197|chr2_61244811_61275606_PEX13_NM_+|	71.0608	-4.19838	1.73365	-2.4217	0.0154483	0.299755	0	0	0	0	0	8.84772	130.528	106.816	190.937	142.656	98.2027	174.742	#DIV/0!	6.38669	-Inf	0.0433607	-Inf	PEX13	chr2:61248150:+	chr2_61021006_+
chr2:38524291-38524342:mpeak_105614|chr2_38523255_38604432_ATL2_NR_-mpeak_105614|chr2_38523732_38604432_ATL2_NM_-||	17.9423	-4.83333	1.91221	-2.52761	0.0114841	0.288014	0	0	0	2.50273	0	12.1656	22.2175	15.8638	64.934	25.0273	20.0629	52.5333	#DIV/0!	22.5381	-Inf	0.0775588	-Inf	ATL2	chr2:38524290:-	chr2_38297150_-
chr2:3477120-3477193:mpeak_102905|chr2_3383445_3482989_TRAPPC12_NM_+|	39.4923	-3.58042	1.61116	-2.22226	0.0262659	0.354261	0	1.05759	0	0	1.05594	8.29473	66.6526	82.4919	106.677	71.3279	63.3566	72.9937	1.24022	6.75373	-3.14429	0.30079	-3.44508	TRAPPC12	chr2:3477200:+	-
chr2:24461800-24461950:mpeak_104053|chr2_24426652_24583397_ITSN2_NM_-|	36.5301	-1.73447	0.841294	-2.06167	0.0392395	0.412293	37.4921	33.8428	48.7005	57.5628	31.6783	76.3116	26.3833	21.1518	60.2959	12.5137	15.8391	16.5895	111.318	368.367	-0.46383	1.26263	-1.72646	ITSN2	chr2:24461804:-;chr2:24461897:-	chr2_24238936_-;chr2_24239031_-
chr2:242661109-242661222:mpeak_120178|chr2_242641455_242664403_ING5_NM_+|	37.0181	-1.68271	0.801382	-2.09975	0.0357505	0.39525	5.55439	8.46071	12.3684	22.5246	15.8391	28.2021	52.7667	63.4553	81.1675	72.5792	46.4615	34.8379	13.3662	43.2587	-1.33515	0.359253	-1.6944	ING5	chr2:242661161:+;chr2:242661215:+	chr2_241721745_+;chr2_241721800_+
chr2:211013712-211013784:mpeak_117853|chr2_210887903_211036094_KANSL1L_NM_-|	8.64139	-4.45573	2.22959	-1.99845	0.045668	0.43855	15.2746	12.6911	20.8716	5.00546	9.50349	28.7551	0	0	11.5954	0	0	0	140.393	#DIV/0!	0.174815	Inf	-Inf	KANSL1L	chr2:211013729:-	chr2_210148994_-;chr2_210149056_-
chr2:203163351-203163416:mpeak_117188|chr2_203130514_203168108_NOP58_NM_+|	54.5554	-4.66002	1.7875	-2.60701	0.00913366	0.277333	0	0	0	2.50273	0	14.9305	66.6526	62.3977	150.74	93.8524	73.916	189.673	#DIV/0!	7.31585	-Inf	-0.353362	-Inf	NOP58	chr2:203163385:+	-
chr2:201357713-201357763:mpeak_116903|chr2_201355339_201374792_KCTD18_NM_-|	11.5218	-5.56456	2.00048	-2.78161	0.00540892	0.267856	0	0	0	1.25137	0	10.5067	12.4974	15.8638	57.9768	12.5137	11.6154	16.0365	#DIV/0!	43.9109	-Inf	1.10404	-Inf	KCTD18	chr2:201357716:-	chr2_200492994_-
chr2:200265380-200265430:mpeak_116820|chr2_200137395_200335989_SATB2_NM_-|	9.60467	-4.57781	1.84315	-2.48369	0.013003	0.29152	0	0	0	3.7541	0	10.5067	20.8289	10.5759	17.0065	12.5137	17.951	22.1193	#DIV/0!	40.68	-Inf	-0.119278	-Inf	SATB2	chr2:200265379:-	chr2_199400657_-
chr2:190323727-190323777:mpeak_116253|chr2_190306158_190339938_WDR75_NM_+|	59.0541	-4.12861	1.94409	-2.12367	0.0336976	0.386772	0	0	0	0	0	11.0596	52.7667	58.1674	204.851	121.383	70.7482	189.673	#DIV/0!	8.69005	-Inf	-0.273886	-Inf	WDR75	chr2:190323777:+	chr2_189459051_+
chr2:140992024-140992075:mpeak_112553|chr2_140990895_142889270_LRP1B_NM_-|	8.05523	-4.15416	2.01153	-2.06518	0.0389062	0.411203	0	0	0	0	2.11189	7.18877	11.1088	26.4397	6.95722	6.25683	9.50349	27.0961	#DIV/0!	32.5528	-Inf	0.0544778	-Inf	LRP1B	chr2:140992022:-	chr2_140234454_-
chr2:113011631-113011681:mpeak_111001|chr2_112974045_113012664_ZC3H8_NM_-|	31.3176	-4.56793	1.81108	-2.52221	0.0116619	0.288136	0	0	0	0	0	9.4007	59.7096	61.3401	84.2596	76.3333	43.2937	41.4737	#DIV/0!	17.5059	-Inf	0.349837	-Inf	ZC3H8	chr2:113011647:-	-
chr2:10265746-10266124:mpeak_103218|chr2_10262694_10269360_RRM2_NM_+|	166.391	-2.01393	0.986219	-2.04208	0.041144	0.420242	9.72018	8.46071	4.63814	40.0437	45.4055	27.6491	158.3	122.68	546.528	312.841	189.014	531.416	2.75756	10.9457	-2.30927	-0.320373	-1.9889	RRM2	chr2:10265801:+	-
chr2:10016837-10016887:mpeak_103179|chr2_9983570_10073911_TAF1B_NM_+|	18.887	-4.65703	2.07487	-2.2445	0.0248004	0.346696	0	0	0	0	0	10.5067	18.0518	20.0942	82.7136	21.2732	25.3426	48.6624	#DIV/0!	33.082	-Inf	0.343112	-Inf	TAF1B	chr2:10016888:+	chr2_9876758_+
chr19:538573-538645:mpeak_95861|chr19_531732_541338_CDC34_NM_+|	75.7351	-4.23095	1.61944	-2.61259	0.0089858	0.277333	0	1.05759	0	2.50273	0	9.4007	155.523	127.968	268.239	81.3388	102.426	160.365	0.575057	5.18849	-3.49253	0.681009	-4.17354	CDC34	chr19:538631:+	chr19_538589_+;chr19_538646_+
chr19:50707378-50707430:mpeak_101430|chr19_50706884_50812896_MYH14_NM_+|	49.1546	-2.67507	1.16316	-2.29984	0.0214576	0.329588	0	3.17277	1.54605	5.00546	4.22377	13.2716	83.3158	60.2825	179.342	83.8415	60.1887	95.6659	2.19181	9.38722	-2.25348	0.430059	-2.68354	MYH14	chr19:50707429:+	chr19_50204171_+
chr19:36257092-36257171:mpeak_99216|chr19_36249043_36259305_PROSER3_NM_+|	4.88484	-5.22654	1.90519	-2.74332	0.00608223	0.268895	2.77719	6.34553	3.86512	8.75956	5.27971	3.87088	4.16579	3.17277	19.3256	0	1.05594	0	48.709	565.376	-0.463616	4.6583	-5.12191	PROSER3	chr19:36257164:+	-
chr19:21702473-21702530:mpeak_98449|chr19_21688436_21719081_ZNF429_NM_+|	29.1175	-1.69343	0.852125	-1.9873	0.0468892	0.443475	31.9377	20.0942	31.694	58.8142	45.4055	40.3677	27.7719	10.5759	40.1973	18.7705	11.6154	12.1656	106.596	339.794	-0.788197	0.884312	-1.67251	ZNF429	chr19:21702528:+	chr19_21519725_+
chr19:20043684-20043750:mpeak_98218|chr19_20011721_20043990_ZNF93_NM_+|	20.9465	-3.4611	1.52272	-2.27296	0.0230284	0.338395	1.3886	0	0	3.7541	7.3916	6.0828	26.3833	22.2094	47.9275	28.7814	43.2937	64.1459	4.31598	12.6475	-3.6331	-0.497047	-3.13605	ZNF93	chr19:20043747:+	chr19_19932941_+
chr18:55108426-55108488:mpeak_95058|chr18_55102916_55143668_ONECUT2_NM_+|	58.9153	-2.36543	1.05543	-2.24119	0.0250138	0.347158	2.77719	3.17277	0	7.5082	7.3916	14.9305	105.533	62.3977	148.421	136.399	104.538	113.914	2.82121	8.40642	-2.32583	-0.165687	-2.16014	ONECUT2	chr18:55108490:+	chr18_57441256_+
chr18:21113954-21114027:mpeak_93616|chr18_21112248_21166581_NPC1_NM_-|	81.2025	-4.12645	1.7431	-2.36731	0.0179179	0.313079	0	1.05759	0	0	2.11189	16.5895	122.196	115.277	233.453	136.399	91.867	255.478	0.673728	5.79894	-4.14429	-0.0387398	-4.10555	NPC1	chr18:21113927:-;chr18:21113997:-	chr18_23533957_-;chr18_23534022_-
chr17:8507709-8507792:mpeak_83180|chr17_8379266_8534079_MYH10_NM_-|	50.4942	-4.4329	1.80112	-2.4612	0.0138474	0.293236	0	0	0	1.25137	0	12.1656	48.6009	69.8008	153.832	96.3552	70.7482	153.176	#DIV/0!	6.28372	-Inf	-0.234487	-Inf	MYH10	chr17:8507713:-	chr17_8604396_-
chr17:78657433-78657483:mpeak_91772|chr17_78518624_78938061_RPTOR_NM_+|	18.9835	-4.90229	1.9527	-2.51051	0.0120556	0.289771	0	0	0	0	1.05594	11.6126	52.7667	47.5915	19.3256	62.5683	17.951	14.9305	#DIV/0!	19.9087	-Inf	0.326412	-Inf	RPTOR	chr17:78657485:+	chr17_80683680_+
chr17:65871808-65871936:mpeak_90551|chr17_65821779_65978367_BPTF_NM_+|	98.2336	-5.76985	1.8378	-3.13955	0.00169207	0.267856	0	0	0	2.50273	0	19.9074	112.476	145.947	401.973	118.88	140.44	236.676	#DIV/0!	6.77729	-Inf	0.413001	-Inf	BPTF	chr17:65871940:+	-
chr17:43506719-43506769:mpeak_86813|chr17_43472999_43510282_ARHGAP27_NM_-|	19.4763	-4.57261	1.77156	-2.58113	0.00984781	0.28059	0	0	0	3.7541	0	7.74175	20.8289	23.2669	73.4373	31.2841	26.3986	47.0035	#DIV/0!	16.4719	-Inf	0.166997	-Inf	ARHGAP27	chr17:43506718:-	chr17_45429353_-
chr17:35620944-35620995:mpeak_85717|chr17_35444374_35766902_ACACA_NM_-|	65.3042	-4.74175	1.6873	-2.81025	0.00495024	0.267856	1.3886	0	0	2.50273	1.05594	18.2484	86.093	130.083	212.582	83.8415	79.1957	168.66	0.971595	6.5744	-3.9731	0.370298	-4.3434	ACACA	chr17:35620944:-	chr17_37264042_-
chr17:3540633-3540684:mpeak_82308|chr17_3539761_3563529_CTNS_NM_+|	18.7692	-3.82628	1.94554	-1.96669	0.0492188	0.453097	0	0	0	0	0	9.95368	37.4921	37.0156	17.0065	61.3169	35.9021	26.5431	#DIV/0!	24.1278	-Inf	-0.435502	-Inf	CTNS	chr17:3540685:+	chr17_3637390_+
chr16:9206982-9207079:mpeak_75204|chr16_9185536_9210524_C16orf72_NM_+|	202.614	-1.88981	0.904058	-2.09037	0.0365846	0.399643	37.4921	58.1674	32.467	208.978	158.391	58.0631	244.393	188.251	558.896	280.306	165.783	440.174	12.922	48.003	-1.73136	0.161936	-1.8933	C16orf72	chr16:9207038:+	chr16_9113142_+;chr16_9113180_+
chr16:88728501-88728560:mpeak_81436|chr16_88719013_88729557_MVD_NM_-|	189.377	-1.25679	0.558035	-2.25217	0.0243114	0.344587	27.7719	45.4763	38.6512	52.5574	36.958	52.5333	499.895	371.214	449.127	260.284	196.405	241.653	8.47572	20.3408	-0.344183	0.918788	-1.26297	MVD	chr16:88728507:-	chr16_88662083_-
chr16:8739636-8739692:mpeak_75067|chr16_8715526_8739964_METTL22_NM_+|	19.544	-3.65435	1.73102	-2.11109	0.0347642	0.390684	0	0	0	0	2.11189	7.74175	20.8289	43.3611	25.5098	26.2787	40.1258	68.5698	#DIV/0!	10.9506	-Inf	-0.589507	-Inf	METTL22	chr16:8739683:+	chr16_8645829_+
chr16:78791048-78791103:mpeak_80595|chr16_78133309_79245504_WWOX_NM_+|	19.838	-4.33	1.83482	-2.35991	0.0182795	0.313389	0	0	0	1.25137	0	12.1656	22.2175	40.1884	37.1052	25.0273	46.4615	53.6393	#DIV/0!	16.0839	-Inf	-0.330477	-Inf	WWOX	chr16:78791099:+	chr16_78757206_+
chr16:78145916-78145966:mpeak_80474|chr16_78133309_78312499_WWOX_NR_+mpeak_80474|chr16_78133309_79245504_WWOX_NM_+||	20.4062	-3.84024	1.70323	-2.25468	0.0241534	0.34333	1.3886	0	0	1.25137	2.11189	15.4835	22.2175	40.1884	37.1052	25.0273	46.4615	53.6393	4.18626	15.062	-3.76262	-0.330477	-3.43214	WWOX	chr16:78145967:+	chr16_78112069_+
chr16:75425170-75425222:mpeak_80337|chr16_75327940_75467387_CFDP1_NM_-|	81.4663	-4.32902	2.02827	-2.13434	0.0328151	0.383353	0	0	0	0	0	8.29473	47.2123	69.8008	422.071	98.8579	90.8111	240.547	#DIV/0!	5.78411	-Inf	0.325449	-Inf	CFDP1	chr16:75425173:-	chr16_75391275_-
chr16:71693655-71693705:mpeak_79747|chr16_71683947_71758604_PHLPP2_NM_-|	78.4695	-4.1245	1.8711	-2.20432	0.027502	0.361447	0	0	0	0	0	9.4007	72.207	94.1254	287.565	143.907	107.706	226.723	#DIV/0!	5.89588	-Inf	-0.0756583	-Inf	PHLPP2	chr16:71693647:-	chr16_71659755_-
chr16:46722157-46722207:mpeak_77993|chr16_46694563_46723144_VPS35_NM_-|	166.027	-5.02745	1.98004	-2.53906	0.011115	0.286729	0	0	0	0	0	17.6954	202.735	207.287	575.903	239.011	190.07	559.618	#DIV/0!	5.36931	-Inf	-0.0040525	-Inf	VPS35	chr16:46722156:-	chr16_46688245_-
chr16:4161946-4162039:mpeak_74864|chr16_4016967_4166186_ADCY9_NM_-|	35.4237	-5.16918	1.67217	-3.09131	0.00199277	0.267856	1.3886	0	0	6.25683	2.11189	12.1656	44.4351	41.2459	178.569	33.7869	33.7902	71.3347	1.57646	14.7823	-3.88634	0.927732	-4.81407	ADCY9	chr16:4161943:-	chr16_4111944_-
chr16:3498582-3498665:mpeak_74726|chr16_3493667_3535466_NAA60_NM_+|	85.6978	-2.84144	1.10068	-2.58154	0.00983618	0.280438	6.94298	1.05759	0	8.75956	8.44754	24.3312	195.792	203.057	122.911	158.923	184.79	113.361	2.30007	9.08786	-2.37627	0.190956	-2.56722	NAA60	chr16:3498655:+	chr16_3448654_+
chr16:23434899-23435038:mpeak_76720|chr16_23400407_23464512_COG7_NM_-|	48.374	-3.0022	1.08122	-2.77667	0.0054919	0.267856	2.77719	2.11518	0	3.7541	6.33566	6.0828	97.2018	115.277	163.881	66.3224	45.4055	71.3347	1.94988	8.83444	-1.72494	1.03978	-2.76472	COG7	chr16:23434985:-	chr16_23423664_-
chr16:19085379-19085434:mpeak_76179|chr16_19078916_19089402_COQ7_NM_+|	39.3993	-3.51804	1.44109	-2.44124	0.0146369	0.295211	0	1.05759	0	8.75956	4.22377	3.87088	66.6526	61.3401	74.2103	70.0765	67.5803	115.02	1.5691	6.67025	-3.99426	-0.32149	-3.67277	COQ7	chr16:19085434:+	chr16_19074110_+
chr16:14247010-14247165:mpeak_75650|chr16_14165169_14354765_MKL2_NM_+|	50.3669	-2.81984	1.07046	-2.63424	0.00843248	0.273381	0	7.40312	0.773024	10.0109	8.44754	23.7782	108.311	82.4919	126.776	65.071	71.8041	99.5368	3.86179	17.8657	-2.36901	0.42581	-2.79481	MKL2	chr16:14247097:+	-
chr15:74756863-74756918:mpeak_71555|chr15_74753605_74773391_UBL7-AS1_NR_+|	7.21618	-4.02431	1.8678	-2.15457	0.0311955	0.376058	0	4.23035	0	6.25683	4.22377	33.7319	5.55439	2.11518	15.4605	2.50273	4.22377	8.29473	54.8683	294.333	-3.3856	0.622764	-4.00837	UBL7-AS1	chr15:74756916:+	-
chr15:51755126-51755334:mpeak_68922|chr15_51741390_51914967_DMXL2_NM_-|	54.4834	-2.51562	1.17426	-2.1423	0.032169	0.380814	1.3886	1.05759	2.31907	2.50273	3.16783	19.3544	91.6474	122.68	105.904	100.109	89.7551	113.914	1.48806	8.23788	-2.39274	0.0760961	-2.46884	DMXL2	chr15:51755282:-	chr15_51462880_-;chr15_51463014_-;chr15_51463098_-;chr15_51463122_-
chr15:42853810-42853885:mpeak_67900|chr15_42841010_42858804_HAUS2_NM_+|	102.584	-2.43466	1.02518	-2.37486	0.0175558	0.31089	5.55439	1.05759	0	11.2623	13.7273	17.6954	130.528	114.22	234.999	269.044	176.342	256.584	2.06733	6.08074	-2.69058	-0.549136	-2.14144	HAUS2	chr15:42853888:+	chr15_42561706_+
chr15:32928331-32928387:mpeak_67119|chr15_32907344_32928457_ARHGAP11A_NM_+|	53.7374	-2.4064	1.16789	-2.06047	0.0393536	0.412412	2.77719	4.23035	0	5.00546	14.7832	23.2253	45.8237	66.6281	148.421	108.869	92.923	132.163	4.0293	12.8802	-2.61782	-0.356308	-2.26151	ARHGAP11A	chr15:32928382:+	chr15_32636150_+;chr15_32636180_+
chr15:101112408-101112459:mpeak_73895|chr15_101110322_101142445_LINS_NM_-|	8.63605	-4.54807	1.83307	-2.48112	0.0130969	0.291744	0	1.05759	0	5.00546	0	11.0596	12.4974	14.8062	25.5098	8.75956	10.5594	14.3775	6.0075	71.5138	-3.92508	0.648304	-4.57338	LINS	chr15:101112407:-	chr15_100572203_-
chr14:89728774-89728846:mpeak_64869|chr14_89629313_90085494_FOXN3_NM_-|	54.2712	-2.95447	1.29431	-2.28267	0.0224499	0.334356	0	3.17277	0	0	5.27971	8.84772	119.419	126.911	140.69	62.5683	88.6992	95.6659	2.45938	8.58172	-2.15469	0.648287	-2.80297	FOXN3	chr14:89728792:-	chr14_89262430_-
chr14:76368802-76368856:mpeak_64295|chr14_76127550_76420766_TTLL5_NM_+|	35.1604	-3.89199	1.67481	-2.32384	0.0201339	0.321426	0	0	0	2.50273	1.05594	10.5067	27.7719	72.9736	46.3814	66.3224	51.7412	142.669	#DIV/0!	5.39454	-Inf	-0.825512	-Inf	TTLL5	chr14:76368854:+	chr14_75902510_+
chr14:105453854-105453916:mpeak_66592|chr14_105452615_105460934_C14orf79_NM_+|	7.84703	-4.9571	2.23429	-2.21865	0.0265109	0.355603	0	1.05759	0	2.50273	3.16783	17.6954	1.3886	8.46071	31.694	1.25137	3.16783	23.7782	7.63725	82.8657	-4.46556	0.559052	-5.02461	C14orf79	chr14:105453916:+	chr14_104987578_+
chr14:104154412-104154466:mpeak_66463|chr14_104095524_104167537_KLC1_NM_+|	91.4915	-5.86412	1.90774	-3.07386	0.00211308	0.267856	0	0	0	3.7541	0	27.6491	101.368	114.22	326.216	86.3443	143.608	294.74	#DIV/0!	8.97761	-Inf	0.0462982	-Inf	KLC1	chr14:104154464:+	chr14_103688126_+
chr13:41636815-41637001:mpeak_55402|chr13_41635696_41656839_WBP4_NM_+|	39.0236	-3.41861	1.58427	-2.15784	0.0309403	0.374696	1.3886	0	0	2.50273	2.11189	8.84772	56.9325	35.958	112.088	81.3388	55.965	111.149	2.0323	5.41846	-3.27723	-0.277498	-2.99973	WBP4	chr13:41637002:+	-
chr13:37394214-37394319:mpeak_55045|chr13_37393338_37401779_RFXAP_NM_+|	7.14286	-3.42137	1.72468	-1.98377	0.0472816	0.444928	0	2.11518	0	2.50273	2.11189	9.95368	9.72018	10.5759	20.0986	16.2678	7.3916	4.97684	15.7088	50.8737	-2.78398	0.496325	-3.28031	RFXAP	chr13:37394277:+;chr13:37394340:+	chr13_36820137_+
chr13:35615390-35615474:mpeak_54932|chr13_35516423_36245037_NBEA_NM_+|	50.9641	-3.64134	1.6352	-2.22684	0.0259581	0.353003	0	1.05759	0	1.25137	0	9.95368	101.368	79.3191	133.733	86.3443	92.923	105.62	1.00909	5.89974	-3.4053	0.142303	-3.5476	NBEA	chr13:35615432:+	chr13_35041292_+
chr13:113512816-113512866:mpeak_58600|chr13_113344642_113536129_ATP11A_NM_+|	7.75455	-4.98525	2.3126	-2.15569	0.0311079	0.375408	0	0	0	0	0	12.1656	9.72018	7.40312	30.1479	15.0164	4.22377	14.3775	#DIV/0!	108.564	-Inf	0.491741	-Inf	ATP11A	chr13:113512869:+	chr13_112858552_+
chr12:66849530-66849626:mpeak_47242|chr12_66743026_67072925_GRIP1_NM_-|	12.2562	-5.15387	1.86924	-2.75721	0.00582977	0.267856	0	0	0	1.25137	4.22377	5.52982	9.72018	15.8638	61.8419	16.2678	5.27971	27.0961	#DIV/0!	22.6237	-Inf	0.845811	-Inf	GRIP1	chr12:66849611:-	chr12_66455748_-
chr12:26627116-26627170:mpeak_42840|chr12_26492416_26986131_ITPR2_NM_-|	36.6425	-5.43415	1.45035	-3.74678	0.000179117	0.257152	0	0	0	6.25683	3.16783	8.84772	61.0982	82.4919	95.082	77.5847	55.965	49.2154	#DIV/0!	9.99774	-Inf	0.385039	-Inf	ITPR2	chr12:26627117:-	-
chr12:2102210-2102261:mpeak_40986|chr12_2055452_2113677_DCP1B_NM_-|	19.2926	-4.19961	1.63855	-2.56301	0.010377	0.283679	2.77719	0	0	2.50273	2.11189	22.6723	34.7149	40.1884	44.0624	16.2678	26.3986	39.8147	7.00335	33.0826	-3.29651	0.52841	-3.82492	DCP1B	chr12:2102207:-	-
chr12:113402620-113402670:mpeak_51185|chr12_113376237_113407766_OAS3_NM_+|	54.5234	-5.27858	1.76749	-2.98648	0.00282208	0.267856	0	0	0	0	2.11189	19.3544	137.471	96.2405	78.8485	138.902	105.594	75.7586	#DIV/0!	10.0543	-Inf	-0.0350854	-Inf	OAS3	chr12:113402671:+	-
chr11:93477527-93477577:mpeak_38564|chr11_93474759_93494680_C11orf54_NM_+|	6.74676	-4.49343	1.94633	-2.30867	0.0209621	0.327844	0	1.05759	0	1.25137	0	7.74175	11.1088	19.0366	20.8716	3.7541	9.50349	6.63579	6.21903	67.8099	-3.08804	1.35869	-4.44673	C11orf54	chr11:93477578:+	chr11_93744416_+
chr11:76503791-76503844:mpeak_37417|chr11_76493356_76506652_TSKU_NM_+|	199.221	-2.37836	0.808876	-2.94033	0.00327865	0.267856	6.94298	11.6335	3.0921	11.2623	8.44754	22.1193	492.952	593.307	583.633	272.798	172.119	212.345	1.2976	6.36415	-0.948905	1.34522	-2.29412	TSKU	chr11:76503845:+	chr11_76792798_+
chr11:68514506-68514671:mpeak_36361|chr11_68475968_68518988_MTL5_NM_-|	14.3958	-3.57292	1.60786	-2.22215	0.026273	0.354261	34.7149	26.4397	27.8289	17.5191	13.7273	36.4968	1.3886	9.5183	3.86512	1.25137	0	0	602.379	1804.51	0.393461	3.56129	-3.16783	MTL5	chr11:68514508:-;chr11:68514593:-;chr11:68514620:-	chr11_68747041_-;chr11_68747153_-
chr11:68511275-68511329:mpeak_36357|chr11_68475968_68518988_MTL5_NM_-|	5.73523	-3.63172	1.80878	-2.00783	0.044661	0.434562	5.55439	6.34553	17.0065	8.75956	7.3916	7.74175	1.3886	9.5183	3.86512	1.25137	0	0	195.684	636.449	0.274808	3.56129	-3.28648	MTL5	chr11:68511277:-	chr11_68743809_-
chr11:68503576-68503787:mpeak_36351|chr11_68475968_68518988_MTL5_NM_-|	25.9208	-3.99506	1.47858	-2.70195	0.00689338	0.269946	52.7667	52.8794	40.1973	42.5464	48.5734	58.0631	1.3886	9.5183	3.86512	1.25137	0	0	987.295	3973.87	-0.0326632	3.56129	-3.59395	MTL5	chr11:68503600:-;chr11:68503663:-;chr11:68503732:-	chr11_68736132_-;chr11_68736251_-
chr11:62584929-62585042:mpeak_35205|chr11_62575138_62599563_STX5_NM_-|	52.5438	-2.95217	1.13365	-2.60412	0.00921093	0.277682	0	3.17277	0	11.2623	7.3916	8.84772	94.4246	105.759	79.6215	138.902	74.9719	106.173	3.40176	8.59301	-3.1157	-0.193859	-2.92184	STX5	chr11:62584896:-;chr11:62584932:-	chr11_62817425_-;chr11_62817458_-
chr11:20399302-20399352:mpeak_32993|chr11_20385230_20404525_HTATIP2_NM_+|	74.6856	-3.95074	1.85564	-2.12904	0.0332507	0.385888	0	0	0	0	0	8.84772	68.0412	99.4133	249.687	143.907	91.867	234.464	#DIV/0!	5.64461	-Inf	-0.172857	-Inf	HTATIP2	chr11:20399376:+	chr11_20377830_+
chr11:1760623-1760681:mpeak_31463|chr11_1756659_1771824_IFITM10_NM_-|	86.7414	-4.17744	1.6033	-2.60553	0.00917313	0.277549	0	1.05759	0	0	3.16783	14.3775	168.02	194.596	162.335	182.699	198.517	116.126	0.604392	5.29173	-4.05224	0.077943	-4.13018	IFITM10	chr11:1760617:-	chr11_1739389_-
chr11:125884416-125884467:mpeak_40389|chr11_125831000_125933187_CDON_NM_-|	6.93094	-3.44177	1.75118	-1.9654	0.049368	0.453736	4.16579	5.28794	0	8.75956	3.16783	2.76491	8.33158	17.979	24.7368	3.7541	4.22377	0	27.7793	122.775	-0.636105	2.67776	-3.31387	CDON	chr11:125884414:-	chr11_126014521_-
chr11:116737522-116737661:mpeak_39584|chr11_116716345_116969131_SIK3_NM_-|	31.624	-4.74111	1.4267	-3.32313	0.00089015	0.267856	0	1.05759	0	8.75956	8.44754	5.52982	79.15	72.9736	52.5656	62.5683	35.9021	52.5333	1.55004	15.0572	-4.42619	0.438852	-4.86504	SIK3	chr11:116737523:-	chr11_116866812_-
chr11:108081547-108081597:mpeak_39154|chr11_108029746_108093365_NPAT_NM_-|	9.18761	-4.49307	1.98455	-2.26402	0.0235729	0.341026	0	0	0	0	2.11189	9.95368	24.9947	17.979	6.18419	21.2732	21.1189	6.63579	#DIV/0!	36.9144	-Inf	0.00382225	-Inf	NPAT	chr11:108081528:-	chr11_108210803_-
chr10:34632158-34632208:mpeak_23870|chr10_34400490_35104253_PARD3_NM_-|	24.4748	-3.86163	1.86653	-2.06889	0.0385566	0.409928	0	1.05759	0	0	0	13.8246	48.6009	46.5339	49.4735	52.5574	39.0699	42.5796	2.19404	30.9028	-3.70838	0.107692	-3.81607	PARD3	chr10:34632157:-	chr10_34343226_-
chr10:134540767-134540856:mpeak_31184|chr10_134351352_134595540_INPP5A_NM_+|	254.605	-1.92195	0.931575	-2.06312	0.0391014	0.412289	2.77719	8.46071	29.3749	12.5137	11.6154	26.5431	726.236	641.956	871.971	289.066	208.021	226.723	1.81294	7.00077	-0.319259	1.62992	-1.94918	INPP5A	chr10:134540818:+;chr10:134540853:+	-
chr10:127501239-127501290:mpeak_30802|chr10_127477574_127511837_UROS_NM_-|	37.7145	-2.8808	1.34552	-2.14103	0.0322719	0.380814	1.3886	1.05759	0	5.00546	2.11189	6.63579	93.036	89.895	43.2893	80.0874	67.5803	62.487	1.62199	6.54429	-2.49116	0.106276	-2.59743	UROS	chr10:127501243:-	chr10_125812675_-
chr10:102745993-102746108:mpeak_28749|chr10_102739129_102747276_MRPL43_NM_-|	246.828	-4.22566	1.31904	-3.20359	0.00135724	0.267856	402.693	262.282	401.973	653.213	473.062	736.019	2.77719	3.17277	23.1907	2.50273	1.05594	0	3661.37	34887.4	-0.803592	3.03362	-3.83721	MRPL43	chr10:102745995:-;chr10:102746033:-	chr10_100986277_-;chr10_100986346_-
chr10:102741128-102741188:mpeak_28748|chr10_102739129_102747276_MRPL43_NM_-|	10.4992	-4.01458	1.63383	-2.45716	0.0140042	0.293546	9.72018	7.40312	18.5526	11.2623	13.7273	32.626	2.77719	3.17277	23.1907	2.50273	1.05594	0	122.426	1079.34	-0.691508	3.03362	-3.72513	MRPL43	chr10:102741133:-	chr10_100981377_-
chr10:101474589-101474656:mpeak_28537|chr10_101474475_101492423_COX15_NM_-|	109.498	-4.50214	1.82188	-2.47115	0.0134681	0.293236	0	0	0	0	0	11.6126	177.74	181.905	294.522	168.934	131.993	347.273	#DIV/0!	5.37456	-Inf	0.0132213	-Inf	COX15	chr10:101474578:-	-
chr1:7836777-7836833:mpeak_559|chr1_7831328_7839685_VAMP3_NM_+|	49.7491	-2.5602	1.18631	-2.15813	0.0309176	0.374632	1.3886	4.23035	1.54605	6.25683	4.22377	30.414	62.4868	75.0888	136.052	70.0765	80.2517	124.974	2.61852	14.8545	-2.51287	-0.00880076	-2.50407	VAMP3	chr1:7836835:+	chr1_7776773_+
chr1:65216479-65216529:mpeak_6047|chr1_65210777_65296521_RAVER2_NM_+|	15.4812	-4.04028	1.98817	-2.03217	0.0421367	0.424846	0	0	0	0	0	11.0596	23.6061	25.3821	27.8289	20.0219	25.3426	52.5333	#DIV/0!	33.8914	-Inf	-0.349848	-Inf	RAVER2	chr1:65216554:+	-
chr1:38046463-38046513:mpeak_3657|chr1_38032608_38061586_GNL2_NM_-|	53.8993	-4.13311	1.80132	-2.29448	0.0217627	0.331202	0	0	0	0	0	9.4007	144.414	87.7798	77.3024	151.415	115.098	61.381	#DIV/0!	8.60098	-Inf	-0.0833078	-Inf	GNL2	chr1:38046456:-	-
chr1:29396547-29396597:mpeak_2793|chr1_29213602_29443330_EPB41_NM_+|	90.5182	-4.49873	1.67407	-2.6873	0.00720328	0.270379	0	0	0	0	0	8.84772	231.896	192.481	174.703	157.672	165.783	154.835	#DIV/0!	5.54959	-Inf	0.324863	-Inf	EPB41	chr1:29396629:+	chr1_29070114_+
chr1:28146798-28146851:mpeak_2597|chr1_28099693_28148741_STX12_NM_+|	50.6859	-3.77847	1.72702	-2.18785	0.0286804	0.364568	0	1.05759	0	0	2.11189	13.2716	66.6526	66.6281	149.967	112.623	54.909	141.01	1.12014	7.47877	-3.86253	-0.123406	-3.73912	STX12	chr1:28146852:+	chr1_27820340_+
chr1:205290283-205290339:mpeak_17860|chr1_205273641_205290919_NUAK2_NM_-|	10.3083	-6.03544	1.78934	-3.37299	0.000743567	0.267856	0	0	0	3.7541	1.05594	15.4835	26.3833	14.8062	24.7368	17.5191	10.5594	9.4007	#DIV/0!	54.1461	-Inf	0.814763	-Inf	NUAK2	chr1:205290245:-	-
chr1:175935471-175935521:mpeak_15331|chr1_175914306_176176380_RFWD2_NM_-|	48.9722	-4.21564	1.91427	-2.20222	0.02765	0.361719	0	0	0	0	0	9.4007	55.5439	49.7067	186.299	91.3497	54.909	140.457	#DIV/0!	9.83624	-Inf	0.0241163	-Inf	RFWD2	chr1:175935468:-	-
chr1:166820127-166820177:mpeak_14482|chr1_166808723_166821821_POGK_NM_+|	41.8306	-4.166	1.83514	-2.27013	0.0231996	0.339145	0	0	0	0	0	8.29473	65.264	67.6857	124.457	73.8306	38.0139	124.421	#DIV/0!	10.5323	-Inf	0.12364	-Inf	POGK	chr1:166820178:+	-
chr1:154317908-154318059:mpeak_13077|chr1_154298035_154321315_ATP8B2_NM_+|	89.5448	-3.45454	1.69763	-2.03492	0.0418587	0.423344	0	0	1.54605	0	0	11.6126	188.849	182.963	282.154	95.1038	107.706	204.603	0.709234	8.55099	-2.90904	0.682721	-3.59176	ATP8B2	chr1:154318042:+	-
chr1:154227198-154227258:mpeak_13059|chr1_154192647_154243356_UBAP2L_NM_+|	30.7566	-3.8575	1.59485	-2.41873	0.0155747	0.29993	0	1.05759	0	2.50273	1.05594	7.74175	29.1605	78.2615	95.082	52.5574	48.5734	53.0863	1.56677	7.32761	-3.41753	0.392988	-3.81052	UBAP2L	chr1:154227250:+	chr1_154254772_+
chr1:147095094-147095145:mpeak_11560|chr1_147013270_147095642_BCL9_NM_+|	61.0577	-3.78249	1.45666	-2.59668	0.00941283	0.277708	1.3886	1.05759	0	3.7541	3.16783	12.7186	90.2588	118.45	206.397	60.0656	61.2447	174.189	0.883937	6.64655	-3.00523	0.490324	-3.49555	BCL9	chr1:147095147:+	chr1_147623344_+
chr1:109326436-109326494:mpeak_8669|chr1_109289284_109351404_STXBP3_NM_+|	27.4272	-3.88808	1.92411	-2.02072	0.0433086	0.430489	0	0	0	1.25137	0	8.84772	19.4404	28.5549	91.2168	48.8033	24.2867	106.726	#DIV/0!	8.42454	-Inf	-0.369233	-Inf	STXBP3	chr1:109326488:+	chr1_108783865_+
chr9:95780566-95780616:mpeak_205370|chr9_95709600_95797619_FGD3_NM_+|	4.94922	-4.86256	2.12057	-2.29304	0.0218455	0.33196	0	1.05759	0	1.25137	0	11.0596	9.72018	10.5759	12.3684	3.7541	7.3916	2.21193	9.71321	138.247	-3.5411	1.29006	-4.83116	FGD3	-	chr9_93018335_+
chr9:19059046-19059096:mpeak_202241|chr9_19056402_19102940_HAUS6_NM_-|	39.1759	-4.0616	1.77815	-2.28417	0.0223618	0.334356	0	0	0	1.25137	0	11.6126	56.9325	80.3767	47.9275	145.158	77.0838	49.7684	#DIV/0!	7.09384	-Inf	-0.554294	-Inf	HAUS6	-	chr9_19059051_-
chr9:134396184-134396234:mpeak_209473|chr9_134378288_134398318_POMT1_NM_+|	44.4551	-4.37868	1.6801	-2.60621	0.00915507	0.277333	0	0	0	0	2.11189	7.18877	54.1553	66.6281	159.243	80.0874	50.6853	113.361	#DIV/0!	5.71448	-Inf	0.197889	-Inf	POMT1	-	chr9_131520819_+
chr9:116247695-116247750:mpeak_207428|chr9_116207008_116359047_RGS3_NM_+|	29.7939	-4.40158	2.0121	-2.18756	0.0287018	0.364579	0	0	0	0	0	11.0596	19.4404	39.1308	115.181	41.2951	50.6853	80.7354	#DIV/0!	19.2101	-Inf	0.00862753	-Inf	RGS3	-	chr9_113485466_+
chr8:77909037-77909090:mpeak_195484|chr8_77896431_77913280_PEX2_NM_-|	27.4095	-4.63028	1.68534	-2.74738	0.00600734	0.268221	1.3886	0	0	6.25683	0	7.74175	44.4351	38.0732	123.684	35.0382	26.3986	45.8975	2.02034	19.5631	-3.33358	0.941877	-4.27546	PEX2	-	chr8_76996783_-
chr8:23294185-23294235:mpeak_192570|chr8_23290667_23315244_ENTPD4_NM_-|	114.023	-5.15752	1.69954	-3.03465	0.00240811	0.267856	0	0	0	0	0	9.4007	298.548	303.528	285.246	203.973	153.112	114.467	#DIV/0!	5.9807	-Inf	0.912042	-Inf	ENTPD4	-	chr8_23436672_-
chr8:144566565-144566615:mpeak_200999|chr8_144520257_144623620_ZC3H3_NM_-|	11.4089	-4.63706	1.96751	-2.35682	0.0184323	0.313394	0	0	0	0	0	8.84772	27.7719	23.2669	24.7368	12.5137	24.2867	15.4835	#DIV/0!	50.7674	-Inf	0.535369	-Inf	ZC3H3	-	chr8_143484425_-
chr7:87530266-87530319:mpeak_186014|chr7_87505543_87536502_DBF4_NM_+|	24.4112	-3.88489	1.78196	-2.18012	0.0292484	0.367177	0	0	0	1.25137	0	7.74175	38.8807	26.4397	64.934	57.5628	25.3426	70.7817	#DIV/0!	8.77736	-Inf	-0.238664	-Inf	DBF4	-	chr7_87901024_+
chr6:56977285-56977335:mpeak_173886|chr6_56954807_57033220_ZNF451_NM_+|	40.3779	-3.8883	1.90728	-2.03866	0.041484	0.42141	0	0	0	0	0	8.29473	26.3833	57.1098	143.009	75.082	60.1887	114.467	#DIV/0!	9.96412	-Inf	-0.140888	-Inf	ZNF451	-	chr6_57112536_+
chr6:3447504-3447554:mpeak_169214|chr6_3273646_3456793_SLC22A23_NM_-|	6.58123	-5.42701	1.75486	-3.09257	0.00198435	0.267856	0	0	0	3.7541	2.11189	8.84772	18.0518	14.8062	6.95722	8.75956	7.3916	8.29473	#DIV/0!	60.1888	-Inf	0.703727	-Inf	SLC22A23	-	chr6_3447262_-
chr6:20579065-20579239:mpeak_170450|chr6_20534687_21231078_CDKAL1_NM_+|	13.2624	-3.67383	1.56486	-2.3477	0.0188895	0.315087	0	1.05759	0	6.25683	6.33566	4.42386	15.2746	30.6701	19.3256	25.0273	13.7273	37.0498	4.86097	22.4477	-4.00807	-0.215856	-3.79221	CDKAL1	-	chr6_20578885_+
chr6:17817417-17817483:mpeak_170252|chr6_17761108_17987854_KIF13A_NM_-|	123.413	-1.25985	0.635979	-1.98096	0.0475952	0.446522	22.2175	12.6911	11.5954	32.5355	21.1189	37.6028	241.616	243.245	241.957	220.24	229.14	167.001	6.3983	14.8053	-0.972584	0.237772	-1.21036	KIF13A	-	chr6_17817173_-
chr6:158356993-158357074:mpeak_180106|chr6_158244202_158363822_SNX9_NM_+|	32.9738	-3.94484	1.62215	-2.43185	0.0150217	0.297588	1.3886	0	0	5.00546	0	8.84772	52.7667	54.9946	98.1741	45.0492	45.4055	84.0533	2.02286	11.9076	-3.31852	0.238898	-3.55742	SNX9	-	chr6_157935999_+
chr5:81306860-81306910:mpeak_161930|chr5_81267843_81549886_ATG10_NM_+|	45.4204	-3.86593	1.7799	-2.17199	0.0298565	0.37025	0	0	0	0	0	8.29473	104.145	89.895	56.4308	136.399	92.923	56.9572	#DIV/0!	8.69229	-Inf	-0.192781	-Inf	ATG10	-	chr5_82011091_+
chr5:43019472-43019616:mpeak_158988|chr5_43015252_43067541_LOC648987_NR_-|	57.4381	-2.52901	1.11592	-2.2663	0.023433	0.34047	0	3.17277	1.54605	6.25683	6.33566	12.7186	152.746	130.083	62.6149	136.399	119.322	58.0631	2.04902	8.06641	-2.42327	0.138682	-2.56195	LOC648987	-	chr5_43019446_-
chr5:150129347-150129397:mpeak_167014|chr5_150090924_150138657_DCTN4_NM_-|	78.6171	-4.58006	1.80628	-2.53563	0.0112245	0.287912	0	0	0	0	0	8.29473	154.134	107.874	290.657	90.0984	85.5314	206.815	#DIV/0!	6.50661	-Inf	0.531153	-Inf	DCTN4	-	chr5_150749788_-
chr4:156637455-156637505:mpeak_155678|chr4_156587861_156651181_GUCY1A3_NM_+|	34.3701	-4.10524	1.63694	-2.50787	0.0121463	0.289971	1.3886	0	0	3.7541	1.05594	8.84772	73.5956	38.0732	115.181	65.071	26.3986	79.0765	1.83637	8.00825	-3.29802	0.411573	-3.70959	GUCY1A3	-	chr4_155716353_+
chr3:78874039-78874233:mpeak_137475|chr3_78648077_79817059_ROBO1_NM_-|	37.2445	-2.83891	1.11217	-2.55258	0.0106927	0.284825	1.3886	5.28794	1.54605	3.7541	6.33566	3.31789	80.5386	93.0678	174.703	17.5191	16.8951	42.5796	2.36071	17.4139	-0.705392	2.17756	-2.88295	ROBO1	-	chr3_78824901_-
chr3:78846114-78846289:mpeak_137470|chr3_78648077_79817059_ROBO1_NM_-|	37.866	-2.79943	1.17114	-2.39034	0.016833	0.306866	4.16579	7.40312	0	6.25683	7.3916	3.87088	80.5386	93.0678	174.703	17.5191	16.8951	42.5796	4.98216	22.7542	-0.598693	2.17756	-2.77625	ROBO1	-	chr3_78796966_-
chr21:47692839-47692973:mpeak_128107|chr21_47655340_47705308_MCM3AP_NM_-|	128.543	-1.73567	0.878228	-1.97634	0.0481168	0.449147	2.77719	8.46071	3.86512	16.2678	19.007	9.95368	177.74	198.827	412.795	208.978	175.287	308.564	1.91332	6.52808	-1.58239	0.188188	-1.77058	MCM3AP	-	chr21_46272911_-
chr20:33334416-33334466:mpeak_122410|chr20_33303169_33413433_NCOA6_NM_-|	98.6831	-4.60965	1.76422	-2.61286	0.00897878	0.277333	0	0	0	0	0	12.7186	176.352	200.942	205.624	198.967	180.566	209.027	#DIV/0!	6.4829	-Inf	-0.0138984	-Inf	NCOA6	-	chr20_34746606_-
chr20:30793456-30793506:mpeak_122125|chr20_30785485_30795546_PLAGL2_NM_-|	41.6885	-4.07909	1.73962	-2.34482	0.0190362	0.315087	0	0	0	0	0	8.84772	91.6474	81.4343	66.4801	75.082	73.916	102.855	#DIV/0!	10.5392	-Inf	-0.0721824	-Inf	PLAGL2	-	chr20_32205631_-
chr2:36597786-36597871:mpeak_105349|chr2_36583369_36775667_CRIM1_NM_+|	36.995	-3.37691	1.5762	-2.14244	0.0321581	0.380814	1.3886	1.05759	0	2.50273	13.7273	1.10596	62.4868	53.937	125.23	43.7978	36.958	101.749	1.5184	9.49892	-2.82516	0.405009	-3.23017	CRIM1	-	chr2_36370704_+
chr2:231636316-231636371:mpeak_119255|chr2_231577556_231683230_CAB39_NM_+|	24.6642	-5.40396	1.89501	-2.85167	0.00434897	0.267856	0	0	0	0	1.05594	9.95368	33.3263	45.4763	112.088	21.2732	15.8391	56.9572	#DIV/0!	17.5556	-Inf	1.02095	-Inf	CAB39	-	chr2_230771632_+
chr2:163166461-163166524:mpeak_114463|chr2_163123889_163175218_IFIH1_NM_-|	11.8361	-3.40391	1.68531	-2.01975	0.0434093	0.430679	16.6632	16.9214	12.3684	13.765	14.7832	12.7186	2.77719	5.28794	41.7433	5.00546	0	0	92.2594	274.812	0.155176	3.31481	-3.15964	IFIH1	-	chr2_162309938_-
chr2:144839804-144839854:mpeak_113313|chr2_144704702_145090101_GTDC1_NM_-|	3.25775	-5.8545	2.47725	-2.36331	0.0181125	0.313389	1.3886	0	0	0	2.11189	8.84772	5.55439	5.28794	11.5954	3.7541	0	0.552982	18.566	254.455	-2.9805	2.38114	-5.36164	GTDC1	-	chr2_144082237_-
chr19:41837967-41838033:mpeak_100121|chr19_41837115_41859838_TGFB1_NM_-|	14.1542	-3.16977	1.42083	-2.23093	0.0256855	0.3518	0	2.11518	0	2.50273	7.3916	7.74175	34.7149	24.3245	17.0065	23.776	24.2867	25.9902	8.34433	23.8156	-3.05968	0.0383175	-3.098	TGFB1	-	chr19_41332030_-;chr19_41332074_-
chr17:53833583-53833667:mpeak_87705|chr17_53828339_53853395_PCTP_NM_+|	24.5208	-6.0401	2.00563	-3.01158	0.00259894	0.267856	0	0	0	1.25137	0	17.1424	22.2175	44.4187	115.954	21.2732	21.1189	50.8744	#DIV/0!	29.5827	-Inf	0.969177	-Inf	PCTP	-	chr17_55756347_+
chr17:43148473-43148524:mpeak_86750|chr17_43138666_43182986_NMT1_NM_+|	44.0358	-4.89538	1.92508	-2.54295	0.010992	0.286729	0	0	0	0	0	16.0365	70.8184	59.225	125.23	88.847	66.5244	101.749	#DIV/0!	18.7109	-Inf	-0.0104001	-Inf	NMT1	-	chr17_45071167_+
chr17:40721496-40721616:mpeak_86378|chr17_40719077_40723564_MLX_NM_+|	36.5622	-3.76919	1.56245	-2.41236	0.0158497	0.300676	1.3886	0	0	7.5082	3.16783	4.42386	58.3211	44.4187	112.088	46.3005	42.2377	118.891	1.93913	7.27953	-3.44284	0.0505631	-3.4934	MLX	-	chr17_42569591_+
chr17:16170469-16170543:mpeak_83725|chr17_16120508_16229113_PIGL_NM_+|	4.69001	-4.71501	2.17832	-2.16452	0.0304244	0.37325	0	0	0	1.25137	0	11.0596	12.4974	4.23035	6.95722	6.25683	7.3916	6.63579	#DIV/0!	91.0388	-Inf	0.223612	-Inf	PIGL	-	chr17_16267229_+
chr16:9204088-9204196:mpeak_75200|chr16_9185536_9210524_C16orf72_NM_+|	164.577	-2.5776	1.21157	-2.12748	0.0333803	0.385911	4.16579	11.6335	0	16.2678	15.8391	49.2154	244.393	188.251	558.896	280.306	165.783	440.174	2.39011	9.17587	-2.36379	0.161936	-2.52573	C16orf72	-	chr16_9110260_+
chr15:72038324-72038374:mpeak_71210|chr15_71433787_72069570_THSD4_NM_+|	110.465	-3.40155	1.55136	-2.19263	0.0283343	0.364328	0	2.11518	0	0	0	8.84772	294.382	283.434	312.302	143.907	123.545	157.047	0.712887	6.25281	-2.06453	1.06823	-3.13276	THSD4	-	chr15_71746054_+
chr13:96596115-96596165:mpeak_57774|chr13_96454066_96705736_UGGT2_NM_-|	4.98581	-5.89311	1.96157	-3.00428	0.00266208	0.267856	0	0	0	1.25137	4.22377	5.52982	6.94298	7.40312	22.4177	1.25137	5.27971	5.52982	#DIV/0!	91.2449	-Inf	1.60795	-Inf	UGGT2	-	chr13_95943862_-
chr13:53029707-53029767:mpeak_56778|chr13_53029494_53049029_CKAP2_NM_+|	44.5122	-2.11298	1.07374	-1.96787	0.0490835	0.452488	5.55439	2.11518	0	25.0273	19.007	11.0596	44.4351	38.0732	80.3945	130.142	110.874	67.4638	7.06209	17.8598	-2.84468	-0.921165	-1.92351	CKAP2	-	chr13_52455626_+
chr13:37576572-37576624:mpeak_55082|chr13_37574677_37583320_EXOSC8_NM_+|	70.9618	-4.46168	1.89799	-2.35074	0.0187363	0.315087	0	0	0	0	0	10.5067	81.9272	90.9526	265.147	123.885	72.8601	206.262	#DIV/0!	7.82119	-Inf	0.120213	-Inf	EXOSC8	-	chr13_37002487_+
chr13:115016820-115016924:mpeak_58770|chr13_115000361_115037658_CDC16_NM_+|	21.9611	-4.90819	1.70468	-2.87924	0.0039863	0.267856	0	0	0	1.25137	1.05594	9.4007	44.4351	26.4397	73.4373	40.0437	23.2307	44.2386	#DIV/0!	10.8898	-Inf	0.42468	-Inf	CDC16	-	chr13_114251455_+
chr11:72047677-72047727:mpeak_36791|chr11_72004659_72145728_CLPB_NM_-|	17.0333	-3.55189	1.65036	-2.15219	0.0313826	0.377091	0	0	0	0	2.11189	7.74175	24.9947	25.3821	23.1907	42.5464	36.958	41.4737	#DIV/0!	12.2175	-Inf	-0.717604	-Inf	CLPB	-	chr11_72336618_-
chr11:57075712-57075764:mpeak_34580|chr11_57067555_57092413_TNKS1BP1_NM_-|	35.1378	-2.92122	1.41243	-2.06823	0.0386186	0.410205	2.77719	0	0	2.50273	5.27971	9.95368	61.0982	58.1674	68.0261	50.0546	44.3496	119.444	4.44845	8.29378	-2.67499	-0.191301	-2.48369	TNKS1BP1	-	chr11_57308192_-
chr11:10209699-10209805:mpeak_32161|chr11_9802063_10315754_SBF2_NM_-|	15.2396	-5.28777	2.42161	-2.18358	0.0289932	0.365755	0	0	0	0	0	14.9305	9.72018	16.9214	72.6643	7.5082	5.27971	55.8512	#DIV/0!	65.2566	-Inf	0.532848	-Inf	SBF2	-	chr11_10188136_-
chr10:50021327-50021377:mpeak_24645|chr10_49893517_50190553_WDFY4_NM_+|	2.95789	-5.87075	2.48521	-2.36228	0.0181629	0.313389	0	0	0	3.7541	0	6.63579	2.77719	6.34553	10.0493	0	3.16783	2.76491	#DIV/0!	175.128	-Inf	1.69223	-Inf	WDFY4	-	chr10_48813332_+
chr10:134377046-134377201:mpeak_31167|chr10_134351352_134595540_INPP5A_NM_+|	256.639	-1.51673	0.640099	-2.36952	0.0178112	0.312512	19.4404	23.2669	17.7796	10.0109	26.3986	18.8014	726.236	641.956	871.971	289.066	208.021	226.723	2.70011	7.62783	0.131668	1.62992	-1.49825	INPP5A	-	chr10_132563682_+
chr10:114332551-114332686:mpeak_29549|chr10_114206755_114575048_VTI1A_NM_+|	59.9894	-2.13531	1.07943	-1.97819	0.0479078	0.448287	2.77719	0	1.54605	2.50273	9.50349	6.0828	134.694	103.644	106.677	145.158	83.4195	123.868	1.87959	5.13242	-2.06493	-0.0307437	-2.03419	VTI1A	-	chr10_112572960_+
chr1:85643072-85643423:mpeak_6805|chr1_85624932_85666728_SYDE2_NM_-|	55.9713	-1.67336	0.747481	-2.23867	0.0251776	0.348771	49.9895	53.937	41.7433	145.158	139.384	72.9937	31.9377	16.9214	46.3814	21.2732	24.2867	27.6491	152.949	488.378	-1.29539	0.379555	-1.67494	SYDE2	-	chr1_85177582_-;chr1_85177661_-
chr1:67430857-67430907:mpeak_6218|chr1_67390577_67450254_MIER1_NM_+|	28.71	-3.9561	1.78568	-2.21546	0.0267286	0.356736	0	0	0	0	0	8.29473	38.8807	52.8794	70.3452	65.071	44.3496	64.6989	#DIV/0!	14.2914	-Inf	-0.103147	-Inf	MIER1	-	chr1_66965210_+
chr1:38056354-38056551:mpeak_3663|chr1_38032608_38061586_GNL2_NM_-|	55.1014	-2.88804	1.28745	-2.24322	0.0248828	0.347055	0	0	2.31907	2.50273	7.3916	11.6126	144.414	87.7798	77.3024	151.415	115.098	61.381	2.24792	6.55912	-3.21318	-0.0833078	-3.12988	GNL2	-	chr1_37590753_-
chr1:33093200-33093250:mpeak_3116|chr1_33087549_33116191_ZBTB8OS_NM_-|	29.3903	-4.13242	1.94552	-2.12407	0.0336643	0.386489	0	0	0	0	0	11.6126	30.5491	32.7852	87.3517	70.0765	40.1258	80.1824	#DIV/0!	18.2987	-Inf	-0.337372	-Inf	ZBTB8OS	-	chr1_32627572_-
chr1:198242359-198242409:mpeak_16909|chr1_198126107_198288541_NEK7_NM_+|	15.3848	-3.55378	1.50722	-2.35784	0.0183819	0.313394	0	1.05759	0	2.50273	5.27971	4.42386	27.7719	26.4397	34.0131	28.7814	20.0629	34.2849	3.59623	14.6835	-3.52878	0.0858267	-3.6146	NEK7	-	chr1_198273321_+
chr1:20087224-20087303:mpeak_1705|chr1_20009937_20126410_TMCO4_NM_-|	11.6712	-4.15054	1.66108	-2.49869	0.0124652	0.290215	0	0	0	0	5.27971	6.63579	19.4404	19.0366	18.5526	30.0328	20.0629	21.0133	#DIV/0!	25.135	-Inf	-0.318324	-Inf	TMCO4	-	chr1_19760681_-
chr1:173792678-173792845:mpeak_15038|chr1_173769657_173793777_CENPL_NM_-|	26.9081	-3.71886	1.60217	-2.32114	0.0202796	0.32212	1.3886	0	0	7.5082	4.22377	10.5067	26.3833	13.7486	77.3024	71.3279	48.5734	61.934	3.54733	12.2301	-4.00137	-0.630777	-3.37059	CENPL	-	chr1_173823520_-
chr1:154143881-154143933:mpeak_13014|chr1_154130197_154155725_TPM3_NR_-mpeak_13014|chr1_154131524_154164611_TPM3_NM_-||	35.314	-3.62966	1.44784	-2.50694	0.0121781	0.289971	2.77719	0	0	17.5191	13.7273	2.76491	38.8807	47.5915	87.3517	60.0656	60.1887	92.901	4.79311	15.9561	-3.61431	-0.294279	-3.32004	TPM3	-	chr1_154171426_-
chr1:114471264-114471314:mpeak_9672|chr1_114466954_114472147_HIPK1-AS1_NR_-|	5.24345	-7.60116	2.57508	-2.95181	0.00315913	0.267856	0	0	0	0	0	9.4007	6.94298	4.23035	37.8782	1.25137	2.11189	1.10596	#DIV/0!	631.03	-Inf	3.4562	-Inf	HIPK1-AS1	-	chr1_113928644_-
chr2:210957295-210957475:mpeak_117842|chr2_210887903_211036094_KANSL1L_NM_-|	4.1646	-5.31568	2.51004	-2.11777	0.0341948	0.387987	4.16579	7.40312	3.0921	2.50273	7.3916	13.8246	0	0	11.5954	0	0	0	42.1462	#DIV/0!	-0.694052	Inf	-Inf	KANSL1L	-	-
chr2:210960064-210960162:mpeak_117843|chr2_210887903_211036094_KANSL1L_NM_-|	5.50115	-4.45181	2.2646	-1.96582	0.0493192	0.453536	6.94298	11.6335	10.0493	11.2623	8.44754	6.0828	0	0	11.5954	0	0	0	82.2909	#DIV/0!	0.150355	Inf	-Inf	KANSL1L	-	-
chr5:116810173-116810254:mpeak_164080|chr5_116751207_116912942_LINC00992_NR_+|	6.70563	-3.64396	1.82545	-1.9962	0.0459121	0.439517	12.4974	7.40312	24.7368	7.5082	3.16783	1.65895	5.55439	6.34553	11.5954	0	0	0	189.984	#DIV/0!	1.85549	Inf	-Inf	LINC00992	-	-
chr1:114468986-114469167:mpeak_9669|chr1_114466954_114472147_HIPK1-AS1_NR_-|	15.9962	-4.20221	1.63427	-2.57131	0.0101315	0.281797	15.2746	37.0156	0.773024	22.5246	27.4545	35.3909	6.94298	4.23035	37.8782	1.25137	2.11189	1.10596	108.178	1910.18	-0.686017	3.4562	-4.14222	HIPK1-AS1	-	-
chr4:170523658-170523785:mpeak_156237|chr4_170315674_170533778_NEK1_NM_-|	19.1776	-3.52731	1.3836	-2.54936	0.010792	0.285704	34.7149	27.4973	12.3684	52.5574	50.6853	21.0133	8.33158	2.11518	16.2335	2.50273	2.11189	0	279.535	1795.11	-0.736443	2.53149	-3.26793	NEK1	-	-
chr1:228823174-228823290:mpeak_19606|chr1_228780393_228879031_RHOU_NR_+|	43.1993	-1.94602	0.8461	-2.29999	0.0214488	0.329575	116.642	58.1674	63.388	82.5902	54.909	75.2056	16.6632	21.1518	16.2335	7.5082	3.16783	2.76491	440.711	1582.51	0.163306	2.00762	-1.84431	RHOU	-	-
chr10:19778118-19778258:mpeak_22366|chr10_19337699_20023085_MALRD1_NM_+|	8.4199	-3.73044	1.70814	-2.18392	0.0289682	0.365755	4.16579	11.6335	5.41117	18.7705	24.2867	19.3544	0	1.05759	13.1414	0	2.11189	1.10596	99.5865	1293.03	-1.55704	2.14162	-3.69866	MALRD1	-	-
chr5:72304840-72305048:mpeak_161015|chr5_72251807_72383894_FCHO2_NM_+|	17.6662	-3.21584	1.32181	-2.4329	0.0149784	0.297431	19.4404	27.4973	7.73024	25.0273	27.4545	27.0961	8.33158	6.34553	51.7926	7.5082	2.11189	1.65895	82.2448	705.539	-0.541675	2.55905	-3.10073	FCHO2	-	-
chr9:140204716-140204766:mpeak_210097|chr9_140201715_140317714_EXD3_NM_-|	2.32609	-5.94785	2.92566	-2.03299	0.0420532	0.424693	0	0	0	0	0	8.84772	1.3886	2.11518	11.5954	1.25137	1.05594	1.65895	#DIV/0!	669.224	-Inf	1.92862	-Inf	EXD3	-	-
chr8:28985814-28985864:mpeak_192953|chr8_28928283_29120610_KIF13B_NM_-|	4.18397	-7.28198	2.87727	-2.53086	0.0113783	0.288014	0	0	0	0	0	17.6954	8.33158	8.46071	10.0493	2.50273	3.16783	0	#DIV/0!	624.116	-Inf	2.24291	-Inf	KIF13B	-	-
chr4:170431679-170431835:mpeak_156226|chr4_170315674_170533778_NEK1_NM_-|	6.75168	-4.44554	1.83429	-2.42357	0.0153687	0.299241	4.16579	7.40312	0	12.5137	19.007	6.63579	8.33158	2.11518	16.2335	2.50273	2.11189	0	65.042	551.24	-1.72167	2.53149	-4.25316	NEK1	-	-
chr1:186021187-186021270:mpeak_16346|chr1_185703682_186158643_HMCN1_NM_+|	4.93884	-4.46755	2.23477	-1.99911	0.0455962	0.438469	4.16579	4.23035	0	6.25683	20.0629	9.4007	0	2.11518	10.8223	0	0	2.21193	64.8977	538.3	-2.08895	2.54818	-4.63713	HMCN1	-	-
chr20:16297722-16297866:mpeak_121378|chr20_16254056_16554079_KIF16B_NM_-|	4.2633	-5.40802	2.64259	-2.04649	0.0407084	0.418462	0	1.05759	0	0	0	14.9305	1.3886	4.23035	20.8716	3.7541	1.05594	3.87088	11.9769	515.977	-3.81941	1.60956	-5.42898	KIF16B	-	-
chrX:110928966-110929172:mpeak_213991|chrX_110924345_110931114_ALG13_NR_+mpeak_213991|chrX_110924345_111002961_ALG13_NM_+||	8.46425	-3.26159	1.44133	-2.2629	0.0236416	0.341062	13.886	8.46071	3.0921	15.0164	9.50349	19.3544	5.55439	6.34553	14.6875	2.50273	3.16783	0	95.6799	515.813	-0.786346	2.22918	-3.01552	ALG13	-	-
chr7:72234593-72234652:mpeak_184874|chr7_72040704_72298813_TYW1B_NM_-|	3.35765	-3.64014	1.81481	-2.0058	0.0448775	0.435124	1.3886	2.11518	1.54605	6.25683	1.05594	8.29473	1.3886	4.23035	10.0493	1.25137	1.05594	1.65895	32.2296	393.507	-1.62794	1.982	-3.60993	TYW1B	-	-
chr4:26622269-26622316:mpeak_147999|chr4_26585545_26756494_TBC1D19_NM_+|	4.0539	-3.97537	1.77045	-2.2454	0.0247422	0.346508	4.16579	2.11518	4.63814	5.00546	8.44754	6.0828	2.77719	6.34553	6.95722	0	2.11189	0	67.9052	308.347	-0.839266	2.92866	-3.76792	TBC1D19	-	-
chr7:157798942-157798992:mpeak_191377|chr7_157333479_158380494_PTPRN2_NM_-|	6.8573	-5.68048	2.28173	-2.48955	0.0127904	0.291257	1.3886	1.05759	0	0	0	8.29473	22.2175	22.2094	21.6447	1.25137	4.22377	0	5.55349	302.996	-1.76166	3.59306	-5.35472	PTPRN2	-	-
chr14:50113596-50113649:mpeak_60738|chr14_50110388_50155098_POLE2_NM_-|	9.55687	-3.38999	1.32485	-2.55876	0.0105045	0.28376	8.33158	2.11518	1.54605	11.2623	12.6713	22.1193	5.55439	10.5759	24.7368	3.7541	3.16783	8.84772	29.3459	292.035	-1.94112	1.37379	-3.31491	POLE2	-	-
chr1:230918961-230919011:mpeak_19712|chr1_230883129_230937315_CAPN9_NM_+|	4.20948	-5.73459	2.50408	-2.2901	0.0220158	0.332499	0	0	0	0	0	8.84772	8.33158	17.979	5.41117	2.50273	6.33566	1.10596	#DIV/0!	266.917	-Inf	1.67352	-Inf	CAPN9	-	-
chr13:96634666-96634716:mpeak_57779|chr13_96454066_96705736_UGGT2_NM_-|	4.94428	-5.87204	2.45963	-2.38737	0.0169696	0.307849	0	0	0	0	0	10.5067	6.94298	7.40312	22.4177	1.25137	5.27971	5.52982	#DIV/0!	261.34	-Inf	1.60795	-Inf	UGGT2	-	-
chr5:72368691-72368741:mpeak_161029|chr5_72251807_72383894_FCHO2_NM_+|	9.74531	-4.14456	1.79611	-2.30752	0.021026	0.328125	4.16579	6.34553	0	5.00546	2.11189	21.5663	8.33158	6.34553	51.7926	7.5082	2.11189	1.65895	23.7205	254.31	-1.44829	2.55905	-4.00734	FCHO2	-	-
chr1:114467246-114467296:mpeak_9667|chr1_114466954_114472147_HIPK1-AS1_NR_-|	6.08516	-4.03579	1.87692	-2.15023	0.0315373	0.377618	4.16579	4.23035	0	1.25137	2.11189	7.74175	6.94298	4.23035	37.8782	1.25137	2.11189	1.10596	25.6755	248.478	-0.403411	3.4562	-3.85962	HIPK1-AS1	-	-
chr14:50139729-50139806:mpeak_60754|chr14_50110388_50155098_POLE2_NM_-|	9.04587	-2.77346	1.27591	-2.17371	0.0297269	0.369234	4.16579	4.23035	5.41117	12.5137	20.0629	5.52982	5.55439	10.5759	24.7368	3.7541	3.16783	8.84772	33.7859	241.644	-1.4646	1.37379	-2.83839	POLE2	-	-
chr5:72330480-72330536:mpeak_161019|chr5_72251807_72383894_FCHO2_NM_+|	10.3124	-3.18011	1.48048	-2.14802	0.0317122	0.377925	9.72018	5.28794	3.86512	16.2678	4.22377	6.63579	8.33158	6.34553	51.7926	7.5082	2.11189	1.65895	28.3937	240.511	-0.523404	2.55905	-3.08246	FCHO2	-	-
chr8:33279604-33279702:mpeak_193220|chr8_33230322_33330664_FUT10_NM_-|	3.30444	-5.17824	2.50056	-2.07083	0.0383747	0.40888	0	0	0.773024	6.25683	0	6.63579	2.77719	7.40312	9.27629	1.25137	5.27971	0	11.9192	197.404	-4.05989	1.57487	-5.63475	FUT10	-	-
chr2:238602859-238602995:mpeak_119900|chr2_238536223_238688064_LRRFIP1_NM_+|	5.77326	-5.42043	2.74825	-1.97232	0.0485727	0.450593	0	1.05759	0	0	0	10.5067	15.2746	2.11518	29.3749	2.50273	8.44754	0	6.78454	191.898	-3.31245	2.09445	-5.40691	LRRFIP1	-	-
chr7:157856436-157856505:mpeak_191380|chr7_157333479_158380494_PTPRN2_NM_-|	6.90325	-6.92186	2.26654	-3.05393	0.00225863	0.267856	1.3886	0	0	0	1.05594	8.84772	22.2175	22.2094	21.6447	1.25137	4.22377	0	6.30496	180.884	-2.83433	3.59306	-6.4274	PTPRN2	-	-
chr20:1327039-1327089:mpeak_120363|chr20_1305986_1357441_SDCBP2-AS1_NR_+|	4.32993	-5.01039	2.39524	-2.09181	0.0364556	0.398722	0	0	0	0	0	8.84772	8.33158	5.28794	14.6875	6.25683	6.33566	2.21193	#DIV/0!	179.292	-Inf	0.93513	-Inf	SDCBP2-AS1	-	-
chr8:29102182-29102324:mpeak_192961|chr8_28928283_29120610_KIF13B_NM_-|	4.06016	-6.09921	2.06923	-2.94758	0.00320272	0.267856	1.3886	0	0	2.50273	8.44754	3.87088	8.33158	8.46071	10.0493	2.50273	3.16783	0	15.5199	174.247	-3.41596	2.24291	-5.65887	KIF13B	-	-
chr1:185945402-185945494:mpeak_16338|chr1_185703682_186158643_HMCN1_NM_+|	2.22562	-6.733	3.02241	-2.22769	0.0259012	0.352908	0	0	0	1.25137	4.22377	6.0828	0	2.11518	10.8223	0	0	2.21193	#DIV/0!	174.176	-Inf	2.54818	-Inf	HMCN1	-	-
chr7:3891398-3891448:mpeak_181263|chr7_3341079_4304755_SDK1_NM_+|	5.09184	-4.94279	2.41152	-2.04966	0.0403977	0.417238	0	0	0	0	0	10.5067	5.55439	8.46071	17.0065	7.5082	2.11189	9.95368	#DIV/0!	161.032	-Inf	0.664353	-Inf	SDK1	-	-
chr1:63150579-63150629:mpeak_5975|chr1_62921127_63154039_DOCK7_NM_-|	6.1971	-5.62148	2.38833	-2.35373	0.018586	0.314046	0	0	0	0	0	8.29473	4.16579	10.5759	35.5591	3.7541	3.16783	8.84772	#DIV/0!	157.798	-Inf	1.67343	-Inf	DOCK7	-	-
chr12:83366340-83366426:mpeak_48686|chr12_83080933_83525988_TMTC2_NM_+|	7.65534	-4.71193	2.19146	-2.15013	0.0315446	0.377618	0	1.05759	0	0	0	12.7186	11.1088	20.0942	22.4177	3.7541	6.33566	14.3775	5.91706	155.946	-3.58809	1.13193	-4.72002	TMTC2	-	-
chr12:12896661-12896712:mpeak_42104|chr12_12878850_12939842_APOLD1_NM_+|	6.81842	-4.93765	2.37364	-2.0802	0.0375072	0.40447	0	0	0	0	0	16.5895	12.4974	10.5759	10.0493	3.7541	8.44754	19.9074	#DIV/0!	154.998	-Inf	0.0448366	-Inf	APOLD1	-	-
chr7:3650602-3650652:mpeak_181257|chr7_3341079_4304755_SDK1_NM_+|	5.04576	-4.86966	2.40321	-2.02632	0.0427324	0.428198	0	0	0	0	0	9.95368	5.55439	8.46071	17.0065	7.5082	2.11189	9.95368	#DIV/0!	152.556	-Inf	0.664353	-Inf	SDK1	-	-
chr1:223096459-223096509:mpeak_19028|chr1_222988430_223175726_DISP1_NM_+|	3.50324	-5.94006	2.44969	-2.42482	0.0153161	0.299241	0	0	0	1.25137	2.11189	8.29473	0	3.17277	19.3256	2.50273	3.16783	2.21193	#DIV/0!	147.897	-Inf	1.5131	-Inf	DISP1	-	-
chr20:14058213-14058264:mpeak_121304|chr20_13976145_16030474_MACROD2_NM_+|	5.07948	-3.9912	1.97815	-2.01764	0.0436288	0.431747	1.3886	1.05759	0	2.50273	0	9.95368	20.8289	6.34553	6.18419	6.25683	4.22377	2.21193	10.9995	147.21	-2.34828	1.39408	-3.74237	MACROD2	-	-
chr2:238621501-238621552:mpeak_119902|chr2_238536223_238688064_LRRFIP1_NM_+|	6.14178	-6.96636	2.69208	-2.58772	0.00966141	0.279144	0	0	0	0	1.05594	14.9305	15.2746	2.11518	29.3749	2.50273	8.44754	0	#DIV/0!	145.991	-Inf	2.09445	-Inf	LRRFIP1	-	-
chr2:133268262-133268312:mpeak_112072|chr2_133174146_133402673_GPR39_NM_+|	4.7007	-4.62866	2.33411	-1.98305	0.0473621	0.445178	0	0	0	0	0	9.4007	9.72018	5.28794	12.3684	6.25683	9.50349	3.87088	#DIV/0!	143.66	-Inf	0.47979	-Inf	GPR39	-	-
chr11:18572290-18572340:mpeak_32872|chr11_18554034_18610293_UEVLD_NM_-|	7.19652	-5.04207	2.5454	-1.98086	0.0476072	0.446541	0	0	0	0	0	14.9305	2.77719	3.17277	33.24	8.75956	6.33566	17.1424	#DIV/0!	138.942	-Inf	0.281738	-Inf	UEVLD	-	-
chr15:76980902-76980967:mpeak_71826|chr15_76641077_77176217_SCAPER_NM_-|	7.45284	-3.57715	1.53705	-2.32728	0.0199504	0.320003	0	4.23035	1.54605	2.50273	7.3916	9.95368	4.16579	17.979	27.0558	5.00546	7.3916	2.21193	17.6108	135.862	-1.78075	1.75182	-3.53257	SCAPER	-	-
chr20:21152761-21152811:mpeak_121742|chr20_21106623_21227116_KIZ_NM_+|	5.94579	-4.75987	2.38972	-1.99181	0.0463923	0.441365	0	0	0	0	0	12.1656	9.72018	14.8062	7.73024	16.2678	8.44754	2.21193	#DIV/0!	135.539	-Inf	0.260531	-Inf	KIZ	-	-
chr14:58798834-58798886:mpeak_61843|chr14_58765221_58838603_ARID4A_NM_+|	12.4874	-4.59525	1.9698	-2.33285	0.0196558	0.318255	4.16579	0	0	0	3.16783	21.0133	9.72018	13.7486	71.1182	7.5082	10.5594	8.84772	13.2126	134.762	-2.53722	1.81321	-4.35044	ARID4A	-	-
chr2:149988442-149988492:mpeak_113527|chr2_149894980_150071059_LYPD6B_NM_+|	3.4813	-4.96277	2.34126	-2.1197	0.0340315	0.387527	0	0	0	1.25137	0	9.4007	4.16579	3.17277	11.5954	6.25683	3.16783	2.76491	#DIV/0!	131.08	-Inf	0.635326	-Inf	LYPD6B	-	-
chr13:21160435-21160572:mpeak_53423|chr13_21141207_21265192_IFT88_NM_+|	4.73093	-5.70362	2.33245	-2.44533	0.0144718	0.293974	0	0	0	3.7541	1.05594	14.3775	0	6.34553	16.2335	6.25683	2.11189	6.63579	#DIV/0!	127.879	-Inf	0.589588	-Inf	IFT88	-	-
chr7:128953053-128953184:mpeak_188944|chr7_128864854_129066879_AHCYL2_NM_+|	4.52478	-4.95912	2.09115	-2.37148	0.017717	0.311729	0	1.05759	0	1.25137	5.27971	8.29473	5.55439	1.05759	20.0986	2.50273	4.22377	4.97684	11.8783	126.68	-3.80926	1.19049	-4.99975	AHCYL2	-	-
chr1:42471172-42471222:mpeak_4206|chr1_42314116_42501596_HIVEP3_NR_-|	8.96398	-5.58699	2.17719	-2.56614	0.0102837	0.283426	0	0	0	0	0	13.2716	15.2746	13.7486	33.24	10.0109	13.7273	8.29473	#DIV/0!	124.293	-Inf	0.958825	-Inf	HIVEP3	-	-
chr5:60235948-60236063:mpeak_159799|chr5_60170510_60240905_ERCC8_NM_-|	5.64432	-5.02676	2.2126	-2.27187	0.0230941	0.338747	0	0	0	0	5.27971	14.9305	2.77719	4.23035	15.4605	7.5082	3.16783	14.3775	#DIV/0!	121.002	-Inf	-0.157142	-Inf	ERCC8	-	-
chr10:88672242-88672324:mpeak_27186|chr10_88516395_88683350_BMPR1A_NM_+|	16.8267	-3.2478	1.37961	-2.35415	0.018565	0.313929	4.16579	5.28794	3.86512	6.25683	3.16783	38.7088	27.7719	11.6335	61.0689	17.5191	15.8391	6.63579	13.256	120.351	-1.85357	1.32897	-3.18254	BMPR1A	-	-
chr2:24516593-24516648:mpeak_104084|chr2_24426652_24583397_ITSN2_NM_-|	18.697	-2.72136	1.19813	-2.27134	0.0231266	0.338837	5.55439	5.28794	8.50326	8.75956	4.22377	39.2617	26.3833	21.1518	60.2959	12.5137	15.8391	16.5895	17.9407	116.249	-1.43329	1.26263	-2.69592	ITSN2	-	-
chr2:163133412-163133462:mpeak_114455|chr2_163123889_163175218_IFIH1_NM_-|	5.81779	-5.25336	2.49439	-2.10607	0.0351983	0.39248	1.3886	2.11518	0	3.7541	0	7.74175	2.77719	5.28794	41.7433	5.00546	0	0	10.5517	114.833	-1.71413	3.31481	-5.02895	IFIH1	-	-
chr13:21174547-21174597:mpeak_53430|chr13_21141207_21265192_IFT88_NM_+|	4.08718	-4.97401	2.49357	-1.99473	0.0460719	0.440384	0	0	0	0	3.16783	8.29473	0	6.34553	16.2335	6.25683	2.11189	6.63579	#DIV/0!	114.591	-Inf	0.589588	-Inf	IFT88	-	-
chr19:2087214-2087275:mpeak_96062|chr19_2073423_2096269_MOB3A_NM_-|	10.505	-3.31901	1.66193	-1.99708	0.045816	0.439068	1.3886	1.05759	3.0921	5.00546	12.6713	0	30.5491	39.1308	9.27629	10.0109	10.5594	3.31789	7.01437	110.997	-1.67435	1.72475	-3.3991	MOB3A	-	-
chr15:77096533-77096637:mpeak_71846|chr15_76641077_77176217_SCAPER_NM_-|	6.33297	-5.13783	2.07418	-2.47705	0.0132474	0.292246	1.3886	0	0	2.50273	0	8.29473	4.16579	17.979	27.0558	5.00546	7.3916	2.21193	8.46694	110.865	-2.95899	1.75182	-4.71081	SCAPER	-	-
chr16:15218616-15218666:mpeak_75858|chr16_15198298_15230816_PKD1P6_NR_-|	3.66377	-5.64325	2.54986	-2.21316	0.0268864	0.357557	0	0	0	1.25137	0	8.29473	2.77719	10.5759	12.3684	0	3.16783	5.52982	#DIV/0!	109.755	-Inf	1.56427	-Inf	PKD1P6	-	-
chr12:132587103-132587155:mpeak_52982|chr12_132568827_132610398_EP400NL_NR_+|	3.97057	-5.02164	2.27727	-2.20512	0.027446	0.361183	0	0	0	1.25137	0	8.29473	6.94298	6.34553	11.5954	1.25137	4.22377	7.74175	#DIV/0!	108.34	-Inf	0.912828	-Inf	EP400NL	-	-
chr3:79782082-79782146:mpeak_137574|chr3_78648077_79817059_ROBO1_NM_-|	45.2133	-3.41784	1.12023	-3.05102	0.00228065	0.267856	6.94298	19.0366	8.50326	8.75956	60.1887	13.8246	80.5386	93.0678	174.703	17.5191	16.8951	42.5796	9.90005	107.506	-1.26328	2.17756	-3.44084	ROBO1	-	-
chr7:149310075-149310204:mpeak_190684|chr7_149246465_149321881_ZNF767P_NR_-|	12.8903	-2.54172	1.05533	-2.40847	0.0160197	0.301916	4.16579	8.46071	3.86512	7.5082	8.44754	10.5067	22.2175	44.4187	20.0986	10.0109	10.5594	4.42386	19.0138	105.874	-0.682211	1.79502	-2.47723	ZNF767P	-	-
chr13:67781859-67781909:mpeak_57005|chr13_66879160_67804468_PCDH9_NM_-|	8.20438	-4.72555	2.2407	-2.10896	0.0349478	0.391357	0	0	0	0	0	14.3775	11.1088	17.979	13.1414	7.5082	10.5594	23.7782	#DIV/0!	103.075	-Inf	0.0131554	-Inf	PCDH9	-	-
chr12:118263425-118263475:mpeak_51631|chr12_117905010_118406028_KSR2_NM_-|	6.69789	-4.37726	2.22895	-1.96382	0.0495509	0.454728	0	0	0	0	0	12.1656	11.1088	11.6335	10.0493	6.25683	14.7832	14.3775	#DIV/0!	103.047	-Inf	-0.111141	-Inf	KSR2	-	-
chr3:113119203-113119253:mpeak_138815|chr3_113010595_113160361_CFAP44_NM_-|	5.89279	-4.5487	2.2957	-1.9814	0.0475461	0.446436	0	0	0	0	0	8.84772	4.16579	9.5183	22.4177	6.25683	8.44754	11.0596	#DIV/0!	103.024	-Inf	0.486712	-Inf	CFAP44	-	-
chr11:35393792-35393842:mpeak_33728|chr11_35282512_35441610_SLC1A2_NM_-|	9.30918	-5.42319	2.16083	-2.50977	0.012081	0.289771	0	0	0	0	0	11.0596	13.886	20.0942	34.0131	5.00546	11.6154	16.0365	#DIV/0!	101.597	-Inf	1.05798	-Inf	SLC1A2	-	-
chr16:15084230-15084292:mpeak_75804|chr16_15068591_15232735_PDXDC1_NM_+|	12.9566	-2.4394	0.993399	-2.45561	0.0140645	0.293546	4.16579	3.17277	6.18419	10.0109	6.33566	17.6954	22.2175	29.6125	21.6447	11.2623	12.6713	10.5067	18.4046	98.8436	-1.33193	1.09315	-2.42508	PDXDC1	-	-
chr8:100444727-100444787:mpeak_197363|chr8_100025493_100887645_VPS13B_NM_+|	9.11132	-4.39563	2.14324	-2.05093	0.0402736	0.417152	0	1.05759	0	0	0	9.95368	6.94298	17.979	42.5163	7.5082	8.44754	14.9305	4.70469	96.6807	-3.23445	1.1266	-4.36105	VPS13B	-	-
chr13:114183052-114183111:mpeak_58723|chr13_114145307_114203739_TMCO3_NM_+|	16.1169	-5.93752	2.63746	-2.25123	0.0243709	0.344589	0	0	0	0	0	20.4603	4.16579	8.46071	95.855	8.75956	3.16783	52.5333	#DIV/0!	95.2224	-Inf	0.750957	-Inf	TMCO3	-	-
chr20:32257511-32257561:mpeak_122254|chr20_32245663_32262264_NECAB3_NM_-|	9.57873	-5.5037	2.14782	-2.56246	0.0103935	0.283679	0	0	0	0	0	9.4007	19.4404	11.6335	44.8354	6.25683	8.44754	14.9305	#DIV/0!	95.1652	-Inf	1.35698	-Inf	NECAB3	-	-
chr7:38311936-38311986:mpeak_183317|chr7_38299831_38313248_TARP_NM_-|	4.73241	-4.94065	2.28704	-2.16028	0.0307507	0.373829	0	0	0	1.25137	0	9.95368	6.94298	4.23035	16.2335	5.00546	2.11189	11.0596	#DIV/0!	92.4662	-Inf	0.592422	-Inf	TARP	-	-
chr2:191213797-191213847:mpeak_116358|chr2_191208195_191235569_INPP1_NM_+|	6.87125	-4.63729	2.14639	-2.16051	0.0307334	0.373829	0	0	0	0	0	8.84772	20.8289	8.46071	14.6875	7.5082	11.6154	10.5067	#DIV/0!	89.5813	-Inf	0.569683	-Inf	INPP1	-	-
chr2:166809808-166809869:mpeak_114668|chr2_166731342_166810348_TTC21B_NM_-|	8.5016	-3.99442	1.74469	-2.28948	0.0220518	0.332724	0	0	3.0921	7.5082	3.16783	4.97684	6.94298	8.46071	50.2466	5.00546	2.11189	10.5067	14.1299	88.8156	-2.33977	1.89726	-4.23703	TTC21B	-	-
chr19:33390755-33390812:mpeak_98901|chr19_33370284_33462935_CEP89_NM_-|	9.63376	-3.32478	1.55868	-2.13307	0.032919	0.384293	5.55439	0	0	8.75956	5.27971	13.2716	18.0518	16.9214	17.0065	13.765	14.7832	2.21193	32.0571	88.7865	-2.29777	0.756885	-3.05466	CEP89	-	-
chr10:88528336-88528386:mpeak_27160|chr10_88516395_88683350_BMPR1A_NM_+|	12.6734	-5.78141	2.15826	-2.67874	0.00738997	0.271829	0	0	0	0	0	11.6126	27.7719	11.6335	61.0689	17.5191	15.8391	6.63579	#DIV/0!	87.1077	-Inf	1.32897	-Inf	BMPR1A	-	-
chr3:79403447-79403619:mpeak_137522|chr3_78648077_79817059_ROBO1_NM_-|	37.67	-4.4897	1.88099	-2.38688	0.0169921	0.307922	1.3886	3.17277	0	0	22.1748	0	80.5386	93.0678	174.703	17.5191	16.8951	42.5796	1.96436	86.4022	-2.28138	2.17756	-4.45894	ROBO1	-	-
chr1:92740077-92740279:mpeak_7252|chr1_92712203_92764566_GLMN_NM_-|	4.02749	-4.24823	1.96929	-2.15724	0.0309871	0.374965	0	0	0	3.7541	10.5594	2.21193	1.3886	4.23035	6.95722	6.25683	6.33566	6.63579	#DIV/0!	85.9435	-Inf	-0.612537	-Inf	GLMN	-	-
chr1:26597746-26597796:mpeak_2401|chr1_26560643_26603623_CEP85_NM_+|	7.67307	-4.54183	2.21329	-2.05207	0.0401628	0.416585	0	0	0	0	0	10.5067	6.94298	11.6335	25.5098	16.2678	7.3916	13.8246	#DIV/0!	84.0894	-Inf	0.234057	-Inf	CEP85	-	-
chr3:195702870-195702920:mpeak_145714|chr3_195686957_195717150_SDHAP1_NR_-|	8.68239	-4.46499	2.18143	-2.04682	0.0406754	0.418462	0	0	0	0	0	12.7186	13.886	12.6911	17.7796	10.0109	10.5594	26.5431	#DIV/0!	80.9869	-Inf	-0.0869926	-Inf	SDHAP1	-	-
chr5:49972032-49972082:mpeak_159223|chr5_49961732_50137799_PARP8_NM_+|	9.59709	-4.79933	2.11104	-2.27345	0.0229993	0.338358	0	0	0	0	0	12.7186	18.0518	14.8062	22.4177	20.0219	10.5594	16.5895	#DIV/0!	80.8886	-Inf	0.228753	-Inf	PARP8	-	-
chr1:42005423-42005511:mpeak_4147|chr1_41976937_42384378_HIVEP3_NM_-|	10.6303	-4.31234	1.99585	-2.16065	0.0307223	0.373829	1.3886	0	0	0	0	9.95368	31.9377	32.7852	13.1414	12.5137	14.7832	11.0596	5.35006	77.8513	-2.8416	1.02149	-3.86309	HIVEP3	-	-
chr16:15126027-15126085:mpeak_75827|chr16_15068591_15232735_PDXDC1_NM_+|	10.7278	-3.66446	1.82728	-2.00541	0.0449187	0.435145	0	3.17277	0	0	1.05594	16.5895	22.2175	29.6125	21.6447	11.2623	12.6713	10.5067	12.9545	76.8522	-2.47548	1.09315	-3.56863	PDXDC1	-	-
chr5:73055284-73055334:mpeak_161088|chr5_72921982_73236668_ARHGEF28_NM_+|	9.54894	-4.12067	1.99414	-2.06639	0.0387916	0.410728	1.3886	0	0	0	0	8.84772	16.6632	20.0942	32.467	15.0164	7.3916	12.7186	6.01781	75.5643	-2.67168	0.978716	-3.65039	ARHGEF28	-	-
chr13:113507006-113507056:mpeak_58599|chr13_113344642_113536129_ATP11A_NM_+|	7.43197	-4.47288	2.24716	-1.99046	0.0465406	0.441646	0	0	0	0	0	8.29473	9.72018	7.40312	30.1479	15.0164	4.22377	14.3775	#DIV/0!	74.0211	-Inf	0.491741	-Inf	ATP11A	-	-
chr3:79388508-79388602:mpeak_137520|chr3_78648077_79817059_ROBO1_NM_-|	39.4659	-4.00121	1.79921	-2.22386	0.0261577	0.353468	0	10.5759	0	0	32.7342	4.97684	80.5386	93.0678	174.703	17.5191	16.8951	42.5796	9.10903	73.469	-1.83421	2.17756	-4.01177	ROBO1	-	-
chr18:12322246-12322305:mpeak_92794|chr18_12307667_12329144_TUBB6_NM_+|	13.1995	-3.26871	1.54766	-2.11204	0.0346832	0.390479	4.16579	0	1.54605	6.25683	2.11189	27.0961	15.2746	12.6911	40.9703	7.5082	14.7832	25.9902	12.4286	73.4542	-2.63436	0.513783	-3.14815	TUBB6	-	-
chr19:46280092-46280142:mpeak_100673|chr19_46273898_46285815_DMPK_NM_-|	8.01663	-4.38856	2.17228	-2.02025	0.0433571	0.430535	0	0	0	0	0	9.95368	5.55439	15.8638	23.9637	13.765	11.6154	15.4835	#DIV/0!	73.0744	-Inf	0.151292	-Inf	DMPK	-	-
chr9:120012226-120012276:mpeak_207629|chr9_119188367_120177317_ASTN2_NM_-|	8.29877	-4.58086	2.12223	-2.15851	0.030888	0.374375	0	0	0	0	0	8.84772	22.2175	20.0942	10.8223	12.5137	19.007	6.0828	#DIV/0!	70.587	-Inf	0.498772	-Inf	ASTN2	-	-
chr11:110496944-110497001:mpeak_39317|chr11_110451949_110583912_ARHGAP20_NM_-|	7.11284	-5.37966	2.13741	-2.5169	0.0118391	0.289227	0	0	0	0	1.05594	11.0596	13.886	4.23035	29.3749	10.0109	6.33566	9.4007	#DIV/0!	70.5837	-Inf	0.883241	-Inf	ARHGAP20	-	-
chrX:63424565-63424615:mpeak_212554|chrX_63413264_63425624_AMER1_NM_-|	9.34683	-4.5236	2.10026	-2.15383	0.0312532	0.376346	0	0	0	0	0	11.0596	19.4404	22.2094	11.5954	12.5137	12.6713	22.6723	#DIV/0!	69.329	-Inf	0.15391	-Inf	AMER1	-	-
chr16:12260031-12260081:mpeak_75536|chr16_12070590_12662362_SNX29_NM_+|	9.32753	-4.88091	2.36692	-2.06214	0.0391945	0.412293	0	0	0	0	0	8.29473	4.16579	6.34553	57.2038	6.25683	15.8391	13.8246	#DIV/0!	69.2757	-Inf	0.914669	-Inf	SNX29	-	-
chr12:83099203-83099263:mpeak_48648|chr12_83080933_83525988_TMTC2_NM_+|	8.23697	-3.47058	1.44961	-2.39415	0.016659	0.306423	2.77719	1.05759	0	5.00546	5.27971	6.63579	11.1088	20.0942	22.4177	3.7541	6.33566	14.3775	10.7275	69.1575	-2.1416	1.13193	-3.27353	TMTC2	-	-
chr1:226178835-226178885:mpeak_19339|chr1_226173224_226187066_SDE2_NM_-|	11.184	-5.09289	2.4636	-2.06726	0.0387099	0.410589	0	0	0	0	0	9.95368	2.77719	11.6335	66.4801	5.00546	7.3916	30.967	#DIV/0!	68.8613	-Inf	0.899474	-Inf	SDE2	-	-
chr17:16120720-16120782:mpeak_83718|chr17_16120508_16229113_PIGL_NM_+|	4.82648	-4.82509	1.86751	-2.5837	0.00977478	0.27994	0	0	0	6.25683	1.05594	6.63579	12.4974	4.23035	6.95722	6.25683	7.3916	6.63579	#DIV/0!	68.7656	-Inf	0.223612	-Inf	PIGL	-	-
chr14:31840848-31840902:mpeak_59705|chr14_31762818_31889788_HEATR5A_NM_-|	16.2614	-3.64449	1.6878	-2.15932	0.0308255	0.374025	5.55439	1.05759	0	3.7541	2.11189	27.0961	19.4404	19.0366	68.7991	17.5191	4.22377	26.5431	9.24527	68.2643	-2.31766	1.15165	-3.46931	HEATR5A	-	-
chr11:1596970-1597020:mpeak_31451|chr11_1593970_1618477_KRTAP5-AS1_NR_+|	14.3572	-5.71959	1.93799	-2.95129	0.00316448	0.267856	0	0	0	0	0	9.4007	47.2123	29.6125	44.0624	18.7705	11.6154	11.6126	#DIV/0!	67.1503	-Inf	1.52525	-Inf	KRTAP5-AS1	-	-
chr2:120794010-120794060:mpeak_111398|chr2_120770603_120932416_EPB41L5_NM_+|	10.9343	-4.50514	2.23004	-2.02021	0.0433615	0.430535	0	0	0	0	0	13.8246	22.2175	25.3821	7.73024	20.0219	34.8461	7.18877	#DIV/0!	66.8319	-Inf	-0.165528	-Inf	EPB41L5	-	-
chr13:61079849-61079899:mpeak_56948|chr13_60970590_61147746_TDRD3_NM_+|	9.65278	-4.60168	2.07103	-2.22193	0.0262879	0.354355	0	0	0	0	0	10.5067	24.9947	15.8638	17.0065	22.5246	10.5594	14.3775	#DIV/0!	66.4116	-Inf	0.285934	-Inf	TDRD3	-	-
chr1:85644143-85644281:mpeak_6806|chr1_85624932_85666728_SYDE2_NM_-|	19.1633	-2.25766	1.07263	-2.10478	0.0353107	0.393045	4.16579	8.46071	0.773024	23.776	11.6154	12.7186	31.9377	16.9214	46.3814	21.2732	24.2867	27.6491	14.0691	65.7158	-1.84415	0.379555	-2.22371	SYDE2	-	-
chr7:149277088-149277138:mpeak_190670|chr7_149246465_149321881_ZNF767P_NR_-|	10.3962	-4.32339	1.71753	-2.51721	0.0118289	0.289227	0	2.11518	0	0	3.16783	7.74175	22.2175	44.4187	20.0986	10.0109	10.5594	4.42386	7.31601	65.4726	-2.36675	1.79502	-4.16176	ZNF767P	-	-
chr3:58355044-58355094:mpeak_136090|chr3_58318616_58410478_PXK_NM_+|	10.6814	-4.90607	2.04317	-2.4012	0.0163413	0.30514	0	0	0	0	0	9.95368	13.886	27.4973	30.921	18.7705	10.5594	16.5895	#DIV/0!	65.0293	-Inf	0.654977	-Inf	PXK	-	-
chr14:88957965-88958015:mpeak_64801|chr14_88934609_89021123_PTPN21_NM_-|	10.2465	-4.93704	2.12858	-2.31941	0.020373	0.322705	0	0	0	0	0	8.29473	18.0518	19.0366	38.6512	8.75956	5.27971	24.8842	#DIV/0!	63.9311	-Inf	0.960406	-Inf	PTPN21	-	-
chr13:113630009-113630064:mpeak_58612|chr13_113623534_113751087_MCF2L_NM_+|	9.45117	-4.39406	1.79837	-2.44336	0.0145514	0.294803	0	2.11518	0	3.7541	7.3916	6.0828	2.77719	11.6335	52.5656	12.5137	7.3916	7.18877	9.47429	63.5878	-3.02595	1.30568	-4.33162	MCF2L	-	-
chr5:50056122-50056185:mpeak_159233|chr5_49961732_50137799_PARP8_NM_+|	10.29	-4.43642	1.91384	-2.31808	0.0204451	0.323172	1.3886	0	0	2.50273	0	17.1424	18.0518	14.8062	22.4177	20.0219	10.5594	16.5895	7.53639	62.4704	-3.82248	0.228753	-4.05123	PARP8	-	-
chr11:85594681-85594731:mpeak_38200|chr11_85566143_85630391_CCDC83_NM_+|	9.72491	-4.59257	2.2056	-2.08223	0.0373215	0.403345	0	0	0	0	0	9.4007	20.8289	25.3821	15.4605	17.5191	25.3426	2.76491	#DIV/0!	61.8106	-Inf	0.434728	-Inf	CCDC83	-	-
chr20:21154422-21154472:mpeak_121744|chr20_21106623_21227116_KIZ_NM_+|	5.84946	-4.63685	2.18115	-2.12587	0.0335141	0.386256	0	0	0	0	1.05594	9.95368	9.72018	14.8062	7.73024	16.2678	8.44754	2.21193	#DIV/0!	61.3299	-Inf	0.260531	-Inf	KIZ	-	-
chr11:110477991-110478041:mpeak_39311|chr11_110451949_110583912_ARHGAP20_NM_-|	7.6053	-3.81175	1.85707	-2.05256	0.0401155	0.416191	1.3886	1.05759	0	1.25137	1.05594	13.2716	13.886	4.23035	29.3749	10.0109	6.33566	9.4007	7.72622	60.5069	-2.67099	0.883241	-3.55423	ARHGAP20	-	-
chr10:104777889-104777939:mpeak_29101|chr10_104678074_104836727_CNNM2_NM_+|	10.6379	-4.67163	2.11561	-2.20817	0.0272322	0.360002	0	0	0	0	0	9.95368	13.886	22.2094	31.694	13.765	7.3916	28.7551	#DIV/0!	59.8277	-Inf	0.44168	-Inf	CNNM2	-	-
chr12:123558421-123558480:mpeak_52480|chr12_123470897_123595036_PITPNM2_NM_-|	8.56648	-3.57263	1.79056	-1.99526	0.0460144	0.440147	1.3886	1.05759	0	2.50273	0	8.84772	23.6061	10.5759	26.2828	5.00546	16.8951	6.63579	6.06845	59.6631	-2.21414	1.0833	-3.29744	PITPNM2	-	-
chr6:3310922-3310972:mpeak_169199|chr6_3272725_3445247_SLC22A23_NR_-mpeak_169199|chr6_3273646_3456793_SLC22A23_NM_-||	6.25085	-3.90426	1.89024	-2.06548	0.0388773	0.411092	0	1.05759	0	2.50273	0	7.18877	18.0518	14.8062	6.95722	8.75956	7.3916	8.29473	7.96873	59.467	-3.19594	0.703727	-3.89967	SLC22A23	-	-
chr6:110022964-110023026:mpeak_176406|chr6_110012423_110146290_FIG4_NM_+|	9.43549	-5.46794	1.84092	-2.97023	0.00297579	0.267856	0	0	0	0	7.3916	6.63579	11.1088	19.0366	33.24	7.5082	9.50349	18.8014	#DIV/0!	58.7525	-Inf	0.823664	-Inf	FIG4	-	-
chr5:41844624-41844678:mpeak_158938|chr5_41731872_41870791_OXCT1_NM_-|	13.9726	-4.8961	2.22547	-2.20003	0.0278051	0.362743	0	0	0	0	0	13.8246	11.1088	16.9214	54.8847	23.776	8.44754	38.7088	#DIV/0!	58.4694	-Inf	0.225189	-Inf	OXCT1	-	-
chr18:72485905-72485955:mpeak_95581|chr18_72342918_72775105_ZNF407_NM_+|	11.67	-4.55767	2.32066	-1.96395	0.0495358	0.454684	0	0	0	0	0	11.6126	6.94298	11.6335	48.7005	7.5082	11.6154	42.0267	#DIV/0!	56.971	-Inf	0.137755	-Inf	ZNF407	-	-
chr5:73190546-73190596:mpeak_161104|chr5_72921982_73236668_ARHGEF28_NM_+|	9.80426	-5.57385	1.8053	-3.0875	0.00201849	0.267856	0	0	0	5.00546	0	8.29473	16.6632	20.0942	32.467	15.0164	7.3916	12.7186	#DIV/0!	56.7954	-Inf	0.978716	-Inf	ARHGEF28	-	-
chr12:46845681-46845738:mpeak_44394|chr12_46777458_47046172_LOC100288798_NR_+|	7.05394	-4.75127	1.82287	-2.60648	0.00914786	0.277333	0	0	0	0	7.3916	4.97684	11.1088	10.5759	17.7796	15.0164	9.50349	8.29473	#DIV/0!	56.5378	-Inf	0.266206	-Inf	LOC100288798	-	-
chr18:59783691-59783743:mpeak_95311|chr18_59713212_59854289_PIGN_NM_-|	12.5098	-4.90745	1.97654	-2.48284	0.0130338	0.29152	0	0	0	0	0	10.5067	23.6061	24.3245	35.5591	20.0219	20.0629	16.0365	#DIV/0!	56.1641	-Inf	0.573052	-Inf	PIGN	-	-
chr5:147799604-147799654:mpeak_166821|chr5_147763497_147821531_FBXO38_NM_+|	10.998	-4.75905	2.02909	-2.34542	0.0190059	0.315087	0	0	0	0	0	8.84772	15.2746	20.0942	40.1973	11.2623	15.8391	20.4603	#DIV/0!	55.8077	-Inf	0.667934	-Inf	FBXO38	-	-
chr2:39570285-39570335:mpeak_105811|chr2_39477846_39664453_MAP4K3_NM_-|	16.6177	-4.94326	2.41046	-2.05075	0.040291	0.417152	0	0	0	0	0	16.5895	8.33158	8.46071	75.7564	15.0164	10.5594	64.6989	#DIV/0!	55.1299	-Inf	0.0358894	-Inf	MAP4K3	-	-
chr3:69810848-69810898:mpeak_137028|chr3_69788585_70013997_MITF_NM_+|	10.493	-4.6733	2.03362	-2.29802	0.0215606	0.329815	0	0	0	0	0	8.29473	22.2175	12.6911	37.1052	21.2732	11.6154	12.7186	#DIV/0!	54.562	-Inf	0.659011	-Inf	MITF	-	-
chr3:79388110-79388225:mpeak_137519|chr3_78648077_79817059_ROBO1_NM_-|	39.374	-5.11107	1.35547	-3.77069	0.000162795	0.257152	1.3886	4.23035	0	3.7541	30.6223	7.18877	80.5386	93.0678	174.703	17.5191	16.8951	42.5796	2.41981	53.9851	-2.887	2.17756	-5.06456	ROBO1	-	-
chr22:23525706-23525756:mpeak_128848|chr22_23522551_23657619_BCR_NM_+|	16.7883	-4.92991	2.06302	-2.38965	0.0168643	0.307133	0	0	0	0	0	16.5895	23.6061	25.3821	43.2893	26.2787	24.2867	42.0267	#DIV/0!	53.7502	-Inf	-0.00490729	-Inf	BCR	-	-
chr5:149184923-149184976:mpeak_166922|chr5_149109814_149227020_PPARGC1B_NM_+|	19.8333	-4.94446	2.17067	-2.27785	0.0227353	0.336893	0	0	0	0	0	21.0133	47.2123	19.0366	30.921	42.5464	14.7832	62.487	#DIV/0!	52.6137	-Inf	-0.302248	-Inf	PPARGC1B	-	-
chr6:84932121-84932246:mpeak_174992|chr6_84834995_84937353_CEP162_NM_-|	5.9412	-4.79557	2.10374	-2.27954	0.022635	0.33588	0	1.05759	0	2.50273	3.16783	8.84772	9.72018	19.0366	8.50326	10.0109	8.44754	0	8.5152	52.4358	-3.77902	1.01335	-4.79237	CEP162	-	-
chr16:15082130-15082180:mpeak_75803|chr16_15068591_15232735_PDXDC1_NM_+|	10.8715	-3.25129	1.31216	-2.47782	0.0132189	0.292246	1.3886	3.17277	0	3.7541	3.16783	11.0596	22.2175	29.6125	21.6447	11.2623	12.6713	10.5067	9.31211	52.2109	-1.97898	1.09315	-3.07213	PDXDC1	-	-
chr19:24264578-24264628:mpeak_98699|chr19_24216206_24309055_ZNF254_NM_+|	15.9015	-5.29322	2.0067	-2.63777	0.00834523	0.273381	0	0	0	0	0	10.5067	20.8289	32.7852	65.707	21.2732	13.7273	25.9902	#DIV/0!	51.68	-Inf	0.968191	-Inf	ZNF254	-	-
chr5:78949493-78949543:mpeak_161632|chr5_78908242_78981021_PAPD4_NM_+|	16.3678	-4.83745	2.0873	-2.31756	0.0204734	0.323259	0	0	0	0	0	15.4835	19.4404	28.5549	42.5163	17.5191	25.3426	47.5565	#DIV/0!	51.3729	-Inf	0.00148845	-Inf	PAPD4	-	-
chr1:36515351-36515401:mpeak_3515|chr1_36396682_36521237_AGO3_NM_+|	6.56583	-4.50523	2.19018	-2.05701	0.0396849	0.414131	0	0	0	0	1.05594	9.95368	4.16579	4.23035	27.0558	11.2623	10.5594	10.5067	#DIV/0!	51.0834	-Inf	0.133065	-Inf	AGO3	-	-
chr2:142285515-142285579:mpeak_112815|chr2_140990895_142889270_LRP1B_NM_-|	9.28422	-3.37683	1.62961	-2.07217	0.0382495	0.40823	1.3886	1.05759	0	3.7541	8.44754	9.4007	11.1088	26.4397	6.95722	6.25683	9.50349	27.0961	8.24451	50.4063	-3.14258	0.0544778	-3.19706	LRP1B	-	-
chr21:37739998-37740048:mpeak_126980|chr21_37692486_37747440_MORC3_NM_+|	12.4351	-4.81049	2.06327	-2.33149	0.0197277	0.318591	0	0	0	0	0	8.84772	18.0518	16.9214	52.5656	12.5137	12.6713	27.6491	#DIV/0!	50.2387	-Inf	0.728454	-Inf	MORC3	-	-
chr20:32258487-32258539:mpeak_122255|chr20_32245663_32262264_NECAB3_NM_-|	9.77923	-3.66116	1.81029	-2.02242	0.0431333	0.429479	0	2.11518	0	2.50273	0	7.18877	19.4404	11.6335	44.8354	6.25683	8.44754	14.9305	8.35937	49.0545	-2.19594	1.35698	-3.55292	NECAB3	-	-
chr13:114160147-114160197:mpeak_58710|chr13_114145307_114203739_TMCO3_NM_+|	15.2874	-5.01321	2.55391	-1.96296	0.0496511	0.454932	0	0	0	0	0	10.5067	4.16579	8.46071	95.855	8.75956	3.16783	52.5333	#DIV/0!	48.898	-Inf	0.750957	-Inf	TMCO3	-	-
chr22:26070430-26070505:mpeak_129126|chr22_25960860_26118255_ADRBK2_NM_+|	15.117	-2.42594	1.21156	-2.00232	0.0452501	0.436553	1.3886	3.17277	2.31907	16.2678	4.22377	10.5067	19.4404	17.979	41.7433	20.0219	9.50349	34.8379	8.69152	48.1613	-2.17161	0.298583	-2.4702	ADRBK2	-	-
chr9:35376542-35376592:mpeak_202988|chr9_35161988_35403744_UNC13B_NM_+|	20.1417	-5.37998	2.09613	-2.56663	0.0102691	0.283426	0	0	0	0	0	13.8246	36.1035	25.3821	79.6215	23.776	12.6713	50.3214	#DIV/0!	47.798	-Inf	0.701545	-Inf	UNC13B	-	-
chr6:42357355-42357405:mpeak_172868|chr6_42196407_42419789_TRERF1_NM_-|	8.15333	-4.36247	2.084	-2.09331	0.0363216	0.397647	1.3886	0	0	1.25137	3.16783	11.6126	2.77719	8.46071	35.5591	2.50273	8.44754	22.6723	8.90183	47.6818	-3.52924	0.476987	-4.00623	TRERF1	-	-
chr18:42381629-42381679:mpeak_94460|chr18_42260137_42643043_SETBP1_NM_+|	10.1515	-4.13294	1.99643	-2.07016	0.0384371	0.40935	0	0	0	0	0	8.84772	13.886	16.9214	26.2828	17.5191	19.007	19.3544	#DIV/0!	47.4999	-Inf	0.0308988	-Inf	SETBP1	-	-
chr2:64185341-64185391:mpeak_107607|chr2_64120669_64246214_VPS54_NM_-|	14.4684	-4.94642	1.92508	-2.56947	0.0101855	0.282643	0	0	0	0	0	9.4007	27.7719	29.6125	45.6084	25.0273	17.951	18.2484	#DIV/0!	46.0617	-Inf	0.75031	-Inf	VPS54	-	-
chr2:231584844-231584937:mpeak_119240|chr2_231577556_231683230_CAB39_NM_+|	28.6403	-2.52986	1.25792	-2.01115	0.0443099	0.433291	8.33158	7.40312	0	11.2623	19.007	12.7186	33.3263	45.4763	112.088	21.2732	15.8391	56.9572	12.3641	45.698	-1.44998	1.02095	-2.47093	CAB39	-	-
chr6:57230998-57231161:mpeak_173932|chr6_57179602_57512796_PRIM2_NM_+|	10.3012	-4.22334	2.15409	-1.96061	0.0499244	0.456371	0	0	0	7.5082	12.6713	0	5.55439	5.28794	25.5098	18.7705	7.3916	40.9207	#DIV/0!	45.1223	-Inf	-0.883903	-Inf	PRIM2	-	-
chr2:44714327-44714377:mpeak_106190|chr2_44589042_44999174_CAMKMT_NM_+|	13.5327	-4.62053	2.03942	-2.26561	0.0234754	0.340741	0	0	0	0	0	9.95368	20.8289	27.4973	37.8782	17.5191	10.5594	38.1558	#DIV/0!	45.0839	-Inf	0.380183	-Inf	CAMKMT	-	-
chr8:101247117-101247228:mpeak_197491|chr8_101170262_101253118_SPAG1_NM_+|	10.1572	-4.18948	1.91205	-2.19109	0.0284453	0.3645	1.3886	0	0	3.7541	8.44754	11.0596	4.16579	5.28794	35.5591	13.765	5.27971	33.1789	9.25467	44.5416	-4.06623	-0.214367	-3.85186	SPAG1	-	-
chr18:42352181-42352231:mpeak_94456|chr18_42260137_42643043_SETBP1_NM_+|	10.1055	-4.05022	1.98208	-2.04342	0.0410109	0.420008	0	0	0	0	0	8.29473	13.886	16.9214	26.2828	17.5191	19.007	19.3544	#DIV/0!	44.5311	-Inf	0.0308988	-Inf	SETBP1	-	-
chr14:35258615-35258665:mpeak_59933|chr14_35222910_35344853_BAZ1A_NM_-|	14.4963	-4.29609	2.14041	-2.00714	0.0447352	0.434562	0	0	0	0	0	13.2716	8.33158	21.1518	41.7433	18.7705	25.3426	45.3445	#DIV/0!	44.5068	-Inf	-0.328788	-Inf	BAZ1A	-	-
chr15:78310056-78310106:mpeak_71934|chr15_78290697_78369994_TBC1D2B_NM_-|	11.3356	-4.36778	1.97338	-2.21335	0.0268737	0.357557	0	0	0	0	0	8.29473	18.0518	17.979	35.5591	15.0164	19.007	22.1193	#DIV/0!	44.3232	-Inf	0.350658	-Inf	TBC1D2B	-	-
chr6:20661142-20661273:mpeak_170457|chr6_20534687_21231078_CDKAL1_NM_+|	14.9009	-2.8174	1.3586	-2.07376	0.0381017	0.407758	0	4.23035	0	6.25683	8.44754	18.8014	15.2746	30.6701	19.3256	25.0273	13.7273	37.0498	19.4439	44.2003	-2.98556	-0.215856	-2.7697	CDKAL1	-	-
chr18:12321618-12321789:mpeak_92793|chr18_12307667_12329144_TUBB6_NM_+|	10.9454	-5.19341	1.87914	-2.76371	0.00571483	0.267856	0	0	0	0	5.27971	8.84772	15.2746	12.6911	40.9703	7.5082	14.7832	25.9902	#DIV/0!	43.8908	-Inf	0.513783	-Inf	TUBB6	-	-
chr1:169340289-169340339:mpeak_14714|chr1_169337193_169365131_BLZF1_NM_+|	9.28986	-4.38271	1.8063	-2.42634	0.0152519	0.299215	1.3886	0	0	2.50273	1.05594	14.3775	23.6061	15.8638	11.5954	8.75956	17.951	14.3775	8.15777	43.653	-3.69118	0.313622	-4.0048	BLZF1	-	-
chr21:17227239-17227289:mpeak_126090|chr21_17102343_17250621_USP25_NM_+|	13.4542	-4.45292	1.85583	-2.39942	0.0164213	0.305408	0	1.05759	0	0	12.6713	4.42386	13.886	17.979	52.5656	12.5137	13.7273	32.626	3.75784	43.5606	-4.01474	0.52031	-4.53505	USP25	-	-
chr19:4532222-4532272:mpeak_96298|chr19_4524097_4535208_PLIN5_NM_-|	38.07	-2.36462	1.03992	-2.27385	0.0229751	0.338187	12.4974	9.5183	9.27629	5.00546	7.3916	10.5067	144.414	134.314	71.1182	32.5355	15.8391	4.42386	8.94449	43.3795	0.450209	2.72815	-2.27794	PLIN5	-	-
chr7:1991681-1991731:mpeak_181067|chr7_1855864_2272583_MAD1L1_NM_-|	19.987	-5.07327	1.9882	-2.55169	0.0107202	0.28499	0	0	0	0	0	14.3775	37.4921	30.6701	57.2038	33.7869	24.2867	42.0267	#DIV/0!	43.0894	-Inf	0.3247	-Inf	MAD1L1	-	-
chr6:80364243-80364293:mpeak_174605|chr6_80340999_80409214_SH3BGRL2_NM_+|	13.1772	-4.48421	2.20784	-2.03103	0.0422515	0.425227	0	0	0	0	0	9.4007	15.2746	13.7486	54.1117	15.0164	6.33566	44.2386	#DIV/0!	42.9971	-Inf	0.341964	-Inf	SH3BGRL2	-	-
chr14:95690075-95690125:mpeak_65566|chr14_95658069_95786245_CLMN_NM_-|	17.2477	-5.07332	1.96071	-2.58749	0.00966767	0.279144	0	0	0	0	0	10.5067	29.1605	26.4397	67.2531	21.2732	27.4545	24.8842	#DIV/0!	42.8191	-Inf	0.738925	-Inf	CLMN	-	-
chr9:3238637-3238687:mpeak_201564|chr9_3225280_3526001_RFX3_NM_-|	18.8819	-5.23096	2.08449	-2.50947	0.0120913	0.289771	0	0	0	0	0	10.5067	16.6632	23.2669	101.266	18.7705	29.5664	26.5431	#DIV/0!	42.094	-Inf	0.915049	-Inf	RFX3	-	-
chr11:123603547-123603647:mpeak_40207|chr11_123597699_123612391_ZNF202_NM_-|	6.71167	-3.68506	1.87717	-1.9631	0.0496351	0.454932	0	0	0.773024	2.50273	5.27971	5.52982	8.33158	5.28794	20.8716	2.50273	8.44754	21.0133	6.72367	41.6482	-4.1061	0.109797	-4.2159	ZNF202	-	-
chr4:42654231-42654281:mpeak_149044|chr4_42415030_42659122_ATP8A1_NM_-|	12.9206	-4.26281	2.13448	-1.99712	0.0458123	0.439068	0	0	0	0	0	9.95368	9.72018	29.6125	34.0131	21.2732	8.44754	42.0267	#DIV/0!	41.6197	-Inf	0.0317857	-Inf	ATP8A1	-	-
chr12:4660935-4661021:mpeak_41169|chr12_4647949_4668022_RAD51AP1_NM_+|	10.5393	-4.37461	1.79667	-2.43484	0.0148985	0.296649	0	0	0	5.00546	7.3916	16.5895	2.77719	6.34553	18.5526	16.2678	13.7273	39.8147	#DIV/0!	41.5222	-Inf	-1.33483	-Inf	RAD51AP1	-	-
chr1:174807277-174807327:mpeak_15240|chr1_174128551_174958985_RABGAP1L_NM_+|	12.558	-4.06651	1.99388	-2.03949	0.0414013	0.42139	0	0	0	0	0	10.5067	16.6632	22.2094	24.7368	32.5355	27.4545	16.5895	#DIV/0!	41.1598	-Inf	-0.267721	-Inf	RABGAP1L	-	-
chr3:79475498-79475561:mpeak_137536|chr3_78648077_79817059_ROBO1_NM_-|	37.9759	-3.18749	1.3773	-2.31431	0.0206507	0.325154	0	4.23035	5.41117	0	16.8951	3.87088	80.5386	93.0678	174.703	17.5191	16.8951	42.5796	4.15213	40.4564	-1.10689	2.17756	-3.28444	ROBO1	-	-
chr2:44619520-44619570:mpeak_106172|chr2_44589042_44999174_CAMKMT_NM_+|	13.4405	-4.46704	2.01525	-2.21662	0.0266493	0.35621	0	0	0	0	0	8.84772	20.8289	27.4973	37.8782	17.5191	10.5594	38.1558	#DIV/0!	40.0746	-Inf	0.380183	-Inf	CAMKMT	-	-
chr13:42315317-42315367:mpeak_55506|chr13_42142441_42535221_VWA8_NM_-|	18.4788	-4.90277	1.96917	-2.48976	0.0127828	0.291257	0	0	0	0	0	12.1656	30.5491	30.6701	57.2038	21.2732	30.6223	39.2617	#DIV/0!	40.0372	-Inf	0.377519	-Inf	VWA8	-	-
chr15:65641423-65641473:mpeak_70448|chr15_65621486_65670378_IGDCC3_NM_-|	12.0033	-4.25221	1.93719	-2.19504	0.028161	0.363812	0	0	0	0	0	8.29473	20.8289	25.3821	27.0558	15.0164	25.3426	22.1193	#DIV/0!	39.8285	-Inf	0.229806	-Inf	IGDCC3	-	-
chr5:37205300-37205350:mpeak_158697|chr5_37107880_37249530_C5orf42_NM_-|	8.37492	-4.49821	2.01396	-2.23352	0.0255147	0.350893	0	0	0	2.50273	0	8.84772	5.55439	13.7486	27.0558	10.0109	8.44754	24.3312	#DIV/0!	39.7892	-Inf	0.115582	-Inf	C5orf42	-	-
chr10:96174757-96174807:mpeak_28046|chr10_96162185_96292784_TBC1D12_NM_+|	16.4102	-6.0404	2.03604	-2.96674	0.00300977	0.267856	0	0	0	0	1.05594	12.1656	15.2746	21.1518	97.401	11.2623	13.7273	24.8842	#DIV/0!	39.7651	-Inf	1.42402	-Inf	TBC1D12	-	-
chr10:121583243-121583293:mpeak_30323|chr10_121485558_121586142_INPP5F_NM_+|	17.286	-4.87695	1.93106	-2.52554	0.0115521	0.288093	0	0	0	0	0	10.5067	23.6061	41.2459	51.7926	25.0273	24.2867	30.967	#DIV/0!	39.2621	-Inf	0.53899	-Inf	INPP5F	-	-
chr3:79515112-79515162:mpeak_137538|chr3_78648077_79817059_ROBO1_NM_-|	36.2714	-6.44118	1.89025	-3.40759	0.000655403	0.267856	0	0	0	0	0	9.95368	80.5386	93.0678	174.703	17.5191	16.8951	42.5796	#DIV/0!	38.7837	-Inf	2.17756	-Inf	ROBO1	-	-
chr11:64602515-64602565:mpeak_35442|chr11_64592001_64612041_CDC42BPG_NM_-|	7.88013	-4.26368	1.74657	-2.44118	0.0146394	0.295211	1.3886	0	0	1.25137	2.11189	8.29473	18.0518	14.8062	18.5526	13.765	5.27971	11.0596	8.10298	38.7252	-3.06962	0.772091	-3.84171	CDC42BPG	-	-
chr9:120033411-120033462:mpeak_207630|chr9_119188367_120177317_ASTN2_NM_-|	8.35697	-4.67866	1.96511	-2.38086	0.0172724	0.308962	0	0	0	1.25137	0	8.29473	22.2175	20.0942	10.8223	12.5137	19.007	6.0828	#DIV/0!	38.0794	-Inf	0.498772	-Inf	ASTN2	-	-
chr7:111046267-111046317:mpeak_188099|chr7_110303777_111202573_IMMP2L_NM_-|	18.8339	-4.57918	2.04259	-2.24185	0.0249713	0.347158	0	0	0	0	0	13.8246	29.1605	24.3245	48.7005	23.776	24.2867	61.934	#DIV/0!	37.7045	-Inf	-0.106268	-Inf	IMMP2L	-	-
chr10:21888771-21888821:mpeak_22739|chr10_21823100_22030867_MLLT10_NM_+|	13.2838	-4.27991	2.08146	-2.05621	0.0397625	0.414555	0	0	0	0	0	8.29473	11.1088	16.9214	54.8847	17.5191	15.8391	34.8379	#DIV/0!	36.4892	-Inf	0.281941	-Inf	MLLT10	-	-
chr3:61894373-61894423:mpeak_136237|chr3_61547242_62278835_PTPRG_NM_+|	9.85511	-4.01826	1.98934	-2.0199	0.0433942	0.430668	1.3886	0	0	0	2.11189	7.18877	11.1088	17.979	40.1973	16.2678	2.11189	19.9074	6.01254	36.4379	-2.7437	0.855689	-3.59939	PTPRG	-	-
chr12:32498734-32498785:mpeak_43424|chr12_32260184_32530473_BICD1_NM_+|	15.0535	-4.36336	1.92859	-2.26246	0.0236689	0.341062	0	0	0	0	0	9.95368	27.7719	32.7852	27.8289	22.5246	22.1748	37.6028	#DIV/0!	36.2822	-Inf	0.102888	-Inf	BICD1	-	-
chr4:25241627-25241688:mpeak_147879|chr4_25235652_25278635_PI4K2B_NM_+|	22.3342	-3.4497	1.67499	-2.05954	0.0394424	0.412628	1.3886	2.11518	0	0	12.6713	10.5067	19.4404	15.8638	109.769	27.5301	20.0629	48.6624	3.62275	36.1195	-2.72577	0.591845	-3.31762	PI4K2B	-	-
chr3:79631383-79631474:mpeak_137561|chr3_78648077_79817059_ROBO1_NM_-|	37.3156	-4.31863	1.57893	-2.73516	0.00623506	0.268895	0	3.17277	0.773024	3.7541	14.7832	0	80.5386	93.0678	174.703	17.5191	16.8951	42.5796	1.69926	36.1145	-2.23205	2.17756	-4.4096	ROBO1	-	-
chr5:137292753-137292803:mpeak_165654|chr5_137276037_137368802_FAM13B_NM_-|	20.4836	-3.43166	1.73979	-1.97246	0.0485572	0.450593	0	1.05759	0.773024	0	0	9.4007	59.7096	31.7277	64.934	30.0328	33.7902	14.3775	1.75602	36.0638	-2.36044	0.999726	-3.36017	FAM13B	-	-
chr7:111879694-111879744:mpeak_188150|chr7_111846642_111982615_ZNF277_NM_+|	22.4019	-4.96257	1.96024	-2.53161	0.0113541	0.288014	0	0	0	0	0	13.8246	34.7149	43.3611	61.0689	30.0328	32.7342	53.0863	#DIV/0!	35.7984	-Inf	0.264289	-Inf	ZNF277	-	-
chr7:111899817-111899867:mpeak_188154|chr7_111846642_111982615_ZNF277_NM_+|	22.4019	-4.96257	1.96024	-2.53161	0.0113541	0.288014	0	0	0	0	0	13.8246	34.7149	43.3611	61.0689	30.0328	32.7342	53.0863	#DIV/0!	35.7984	-Inf	0.264289	-Inf	ZNF277	-	-
chr15:65976560-65976610:mpeak_70520|chr15_65954325_66084631_DENND4A_NM_-|	9.8676	-5.00206	1.61253	-3.10199	0.00192221	0.267856	0	0	0	3.7541	4.22377	9.4007	12.4974	16.9214	21.6447	12.5137	14.7832	22.6723	#DIV/0!	34.7786	-Inf	0.031254	-Inf	DENND4A	-	-
chr2:153282552-153282649:mpeak_113726|chr2_153191750_153504309_FMNL2_NM_+|	12.4695	-4.71886	1.95883	-2.40903	0.0159952	0.301916	0	0	0	0	1.05594	15.4835	12.4974	21.1518	27.8289	17.5191	25.3426	28.7551	#DIV/0!	34.6415	-Inf	-0.220228	-Inf	FMNL2	-	-
chr13:42230043-42230093:mpeak_55491|chr13_42142441_42535221_VWA8_NM_-|	18.3406	-4.71244	1.93386	-2.43681	0.0148174	0.296022	0	0	0	0	0	10.5067	30.5491	30.6701	57.2038	21.2732	30.6223	39.2617	#DIV/0!	34.5776	-Inf	0.377519	-Inf	VWA8	-	-
chr14:66978385-66978435:mpeak_62800|chr14_66974124_67647520_GPHN_NM_+|	23.0016	-4.92327	2.07025	-2.3781	0.0174019	0.30944	0	0	0	0	0	13.8246	29.1605	28.5549	84.2596	20.0219	32.7342	67.4638	#DIV/0!	34.4982	-Inf	0.239961	-Inf	GPHN	-	-
chr3:79579695-79579753:mpeak_137547|chr3_78648077_79817059_ROBO1_NM_-|	37.3227	-4.09934	1.53392	-2.67247	0.00752956	0.272454	2.77719	2.11518	0	5.00546	12.6713	0	80.5386	93.0678	174.703	17.5191	16.8951	42.5796	2.1069	34.438	-1.85325	2.17756	-4.03081	ROBO1	-	-
chr8:12604561-12604710:mpeak_191949|chr8_12580763_12612992_LONRF1_NM_-mpeak_191949|chr8_12580763_12612992_LONRF1_NM_-||	32.3142	-5.00211	2.13563	-2.34222	0.0191695	0.315419	0	1.05759	0	0	0	9.95368	31.9377	42.3035	215.674	17.5191	7.3916	61.934	1.09438	34.3844	-3.23445	1.73912	-4.97357	LONRF1	-	-
chr2:213297447-213297497:mpeak_117990|chr2_212248785_213403352_ERBB4_NM_-|	22.1999	-5.33329	2.183	-2.44311	0.0145614	0.294826	0	0	0	0	0	8.29473	24.9947	89.895	70.3452	8.75956	59.1328	4.97684	#DIV/0!	34.1491	-Inf	1.34598	-Inf	ERBB4	-	-
chr2:201191066-201191116:mpeak_116878|chr2_201170603_201342358_SPATS2L_NM_+|	46.3022	-6.1135	2.27702	-2.68487	0.00725591	0.270379	0	0	0	0	0	22.1193	30.5491	42.3035	265.92	40.0437	26.3986	128.292	#DIV/0!	34.0761	-Inf	0.798813	-Inf	SPATS2L	-	-
chr11:9858617-9858667:mpeak_32122|chr11_9802063_10315754_SBF2_NM_-|	15.3889	-4.3618	2.13157	-2.04628	0.0407285	0.418462	1.3886	0	0	0	3.16783	12.1656	9.72018	16.9214	72.6643	7.5082	5.27971	55.8512	4.19491	33.5088	-3.46498	0.532848	-3.99783	SBF2	-	-
chr7:11176764-11176814:mpeak_181996|chr7_11013498_11209042_PHF14_NR_+|	13.8439	-4.1465	2.1082	-1.96685	0.0492008	0.453097	0	0	0	0	0	8.29473	20.8289	7.40312	54.8847	21.2732	15.8391	37.6028	#DIV/0!	33.3054	-Inf	0.153739	-Inf	PHF14	-	-
chr7:110524820-110524870:mpeak_188047|chr7_110303777_111202573_IMMP2L_NM_-|	18.6957	-4.40987	2.01323	-2.19044	0.028492	0.3645	0	0	0	0	0	12.1656	29.1605	24.3245	48.7005	23.776	24.2867	61.934	#DIV/0!	33.1799	-Inf	-0.106268	-Inf	IMMP2L	-	-
chr3:79787035-79787148:mpeak_137576|chr3_78648077_79817059_ROBO1_NM_-|	38.0048	-4.68298	1.30146	-3.59825	0.00032036	0.267856	4.16579	1.05759	0	2.50273	15.8391	7.18877	80.5386	93.0678	174.703	17.5191	16.8951	42.5796	2.24945	33.1593	-2.28917	2.17756	-4.46673	ROBO1	-	-
chr6:41846478-41846528:mpeak_172783|chr6_41764461_41863099_USP49_NM_-|	15.3536	-4.02941	2.04416	-1.97118	0.0487031	0.450866	0	0	0	0	0	10.5067	27.7719	12.6911	37.8782	17.5191	25.3426	52.5333	#DIV/0!	33.0415	-Inf	-0.284144	-Inf	USP49	-	-
chr1:62274887-62274937:mpeak_5821|chr1_62208148_62626579_INADL_NM_+|	21.143	-4.77217	1.96276	-2.43135	0.0150426	0.297588	0	0	0	0	0	12.1656	33.3263	29.6125	68.0261	38.7923	25.3426	46.4505	#DIV/0!	33.0033	-Inf	0.244018	-Inf	INADL	-	-
chr8:120917664-120917714:mpeak_199148|chr8_120885894_121061814_DEPTOR_NM_+|	15.8805	-4.5201	1.97262	-2.29142	0.021939	0.33213	0	0	0	0	0	8.29473	24.9947	16.9214	64.934	21.2732	24.2867	29.861	#DIV/0!	32.9938	-Inf	0.502552	-Inf	DEPTOR	-	-
chr9:135492221-135492271:mpeak_209600|chr9_135470499_135545788_DDX31_NM_-|	17.7905	-4.39326	1.9958	-2.20125	0.0277182	0.362139	0	0	0	0	0	11.0596	18.0518	26.4397	56.4308	46.3005	25.3426	29.861	#DIV/0!	32.6872	-Inf	-0.00829575	-Inf	DDX31	-	-
chr5:172492217-172492267:mpeak_167979|chr5_172483354_172560632_CREBRF_NM_+|	21.5846	-4.14582	1.80829	-2.29267	0.0218671	0.331998	1.3886	0	0	0	0	9.4007	44.4351	46.5339	70.3452	26.2787	27.4545	33.1789	2.58241	32.449	-2.75914	0.892244	-3.65138	CREBRF	-	-
chr21:38177030-38177080:mpeak_127019|chr21_38126718_38362545_HLCS_NM_-|	21.6259	-4.58609	1.93343	-2.37199	0.0176925	0.311459	0	0	0	0	0	13.8246	31.9377	43.3611	42.5163	41.2951	40.1258	46.4505	#DIV/0!	32.4339	-Inf	-0.118169	-Inf	HLCS	-	-
chr15:71049995-71050045:mpeak_70999|chr15_70949466_71055850_UACA_NM_-|	13.2705	-3.96201	1.94524	-2.03677	0.0416735	0.422429	0	0	0	0	0	8.29473	19.4404	30.6701	23.9637	21.2732	16.8951	38.7088	#DIV/0!	32.3688	-Inf	-0.0535829	-Inf	UACA	-	-
chr3:78841908-78841958:mpeak_137468|chr3_78648077_79817059_ROBO1_NM_-|	36.1332	-6.20829	1.85365	-3.34922	0.000810393	0.267856	0	0	0	0	0	8.29473	80.5386	93.0678	174.703	17.5191	16.8951	42.5796	#DIV/0!	32.3197	-Inf	2.17756	-Inf	ROBO1	-	-
chr2:38538412-38538462:mpeak_105619|chr2_38523255_38604432_ATL2_NR_-mpeak_105619|chr2_38523732_38604432_ATL2_NM_-||	17.5955	-4.39261	2.06194	-2.13033	0.0331443	0.385683	0	0	0	0	0	10.5067	22.2175	15.8638	64.934	25.0273	20.0629	52.5333	#DIV/0!	32.2873	-Inf	0.0775588	-Inf	ATL2	-	-
chr7:116724817-116724867:mpeak_188357|chr7_116593380_116869815_ST7_NM_+|	23.5931	-4.81591	2.05051	-2.34865	0.0188419	0.315087	0	0	0	0	0	13.8246	22.2175	34.9004	83.4866	37.541	25.3426	65.8049	#DIV/0!	32.228	-Inf	0.12776	-Inf	ST7	-	-
chr15:28378723-28378774:mpeak_66872|chr15_28357181_28567298_HERC2_NM_-|	27.8451	-4.79473	1.98551	-2.41486	0.0157411	0.300524	0	0	0	0	0	18.8014	48.6009	39.1308	52.5656	50.0546	58.0769	66.9109	#DIV/0!	32.2232	-Inf	-0.319217	-Inf	HERC2	-	-
chr17:6759209-6759265:mpeak_82781|chr17_6756894_6803186_ALOX12P2_NR_+|	9.6865	-5.12383	1.68414	-3.0424	0.002347	0.267856	0	0	0	1.25137	5.27971	7.18877	29.1605	19.0366	11.5954	13.765	19.007	9.95368	#DIV/0!	32.1115	-Inf	0.484861	-Inf	ALOX12P2	-	-
chr12:50047003-50047056:mpeak_44926|chr12_50039686_50101197_FMNL3_NM_-|	10.3243	-4.29608	1.84273	-2.33137	0.0197338	0.318591	0	0	0	0	3.16783	9.95368	12.4974	17.979	18.5526	33.7869	16.8951	11.0596	#DIV/0!	31.8784	-Inf	-0.332609	-Inf	FMNL3	-	-
chr2:142528610-142528731:mpeak_112987|chr2_140990895_142889270_LRP1B_NM_-|	8.5019	-3.59658	1.76766	-2.03465	0.0418859	0.423522	0	1.05759	0	5.00546	5.27971	3.31789	11.1088	26.4397	6.95722	6.25683	9.50349	27.0961	7.1289	31.741	-3.68508	0.0544778	-3.73956	LRP1B	-	-
chr3:136436496-136436546:mpeak_141118|chr3_136057119_136471245_STAG1_NM_-|	19.507	-4.78682	2.00075	-2.39251	0.0167334	0.306655	0	0	0	0	0	9.4007	29.1605	28.5549	78.0754	32.5355	12.6713	43.6856	#DIV/0!	31.7261	-Inf	0.611254	-Inf	STAG1	-	-
chr3:136081592-136081642:mpeak_141052|chr3_136057119_136471245_STAG1_NM_-|	19.5951	-3.83357	1.95292	-1.963	0.0496463	0.454932	0	1.05759	0	0	0	9.4007	29.1605	28.5549	78.0754	32.5355	12.6713	43.6856	2.33651	31.7261	-3.15199	0.611254	-3.76324	STAG1	-	-
chr16:77226048-77226356:mpeak_80419|chr16_77224815_77232004_MON1B_NM_+|	33.2128	-1.57788	0.795194	-1.98427	0.0472256	0.44488	8.33158	6.34553	3.0921	18.7705	22.1748	11.6126	52.7667	48.6491	61.0689	50.0546	55.965	59.7221	10.9359	31.7107	-1.56453	-0.0286333	-1.5359	MON1B	-	-
chr6:107424208-107424272:mpeak_176071|chr6_107392154_107435636_BEND3_NM_-|	13.4091	-4.56829	1.63744	-2.7899	0.00527248	0.267856	0	1.05759	0	2.50273	11.6154	3.87088	19.4404	17.979	47.1545	17.5191	24.2867	15.4835	3.75147	31.4002	-4.08826	0.561945	-4.65021	BEND3	-	-
chr14:36778135-36778185:mpeak_60130|chr14_36768396_36789882_MBIP_NM_-|	21.2719	-4.74617	2.10467	-2.25506	0.0241294	0.34312	0	0	0	0	0	11.0596	20.8289	23.2669	93.5359	25.0273	17.951	63.593	#DIV/0!	31.1331	-Inf	0.368995	-Inf	MBIP	-	-
chr9:80867271-80867321:mpeak_204236|chr9_80850990_80881357_CEP78_NM_+|	7.18197	-4.58779	2.03377	-2.25581	0.0240826	0.34276	0	0	0	1.25137	1.05594	8.29473	13.886	2.11518	25.5098	15.0164	6.33566	12.7186	#DIV/0!	31.1178	-Inf	0.284962	-Inf	CEP78	-	-
chr17:2215026-2215076:mpeak_82162|chr17_2207236_2226948_SRR_NM_+|	20.9648	-4.7284	1.91284	-2.47192	0.0134388	0.293236	0	0	0	0	0	11.0596	45.8237	35.958	51.7926	43.7978	21.1189	42.0267	#DIV/0!	31.0248	-Inf	0.320796	-Inf	SRR	-	-
chr9:5958995-5959145:mpeak_201858|chr9_5923309_6008003_KIAA2026_NM_-|	17.4379	-4.17646	1.58797	-2.63007	0.0085368	0.273381	1.3886	1.05759	0	5.00546	9.50349	4.42386	8.33158	30.6701	87.3517	15.0164	22.1748	24.3312	2.90398	30.7738	-2.95228	1.03828	-3.99056	KIAA2026	-	-
chr12:94079173-94079223:mpeak_49266|chr12_94071150_94243745_CRADD_NM_+|	9.6462	-3.17887	1.62078	-1.96132	0.0498413	0.455956	0	2.11518	0	2.50273	4.22377	6.0828	8.33158	24.3245	26.2828	20.0219	5.27971	16.5895	10.7663	30.5777	-2.59834	0.492579	-3.09092	CRADD	-	-
chr18:59952784-59952834:mpeak_95342|chr18_59854523_59972646_KIAA1468_NM_+|	16.3575	-4.41794	1.88925	-2.33846	0.0193635	0.316393	0	0	0	0	0	8.29473	31.9377	24.3245	50.2466	25.0273	22.1748	34.2849	#DIV/0!	30.5376	-Inf	0.386331	-Inf	KIAA1468	-	-
chr6:88364815-88364865:mpeak_175279|chr6_88299784_88376735_ORC3_NM_+|	11.6678	-4.25077	1.98954	-2.13656	0.0326339	0.382941	0	0	0	1.25137	0	13.8246	12.4974	9.5183	28.6019	20.0219	21.1189	33.1789	#DIV/0!	30.4279	-Inf	-0.554106	-Inf	ORC3	-	-
chrX:46779190-46779246:mpeak_211833|chrX_46771710_46917568_JADE3_NM_+|	21.2073	-4.28419	1.99478	-2.1477	0.0317378	0.377925	0	0	0	0	0	13.8246	33.3263	33.8428	36.3321	31.2841	29.5664	76.3116	#DIV/0!	30.237	-Inf	-0.406233	-Inf	JADE3	-	-
chr3:78748011-78748072:mpeak_137454|chr3_78648077_79817059_ROBO1_NM_-|	36.9088	-5.07313	1.587	-3.19667	0.00139022	0.267856	0	2.11518	0	0	11.6154	3.87088	80.5386	93.0678	174.703	17.5191	16.8951	42.5796	1.82181	30.1704	-2.87214	2.17756	-5.04969	ROBO1	-	-
chr1:246229330-246229380:mpeak_20555|chr1_245912966_246670644_SMYD3_NM_-|	21.9464	-4.29901	1.96068	-2.19262	0.028335	0.364328	0	0	0	0	0	14.3775	40.2693	37.0156	27.8289	62.5683	34.8461	46.4505	#DIV/0!	29.9813	-Inf	-0.452763	-Inf	SMYD3	-	-
chr2:25824331-25824532:mpeak_104306|chr2_25600422_25896516_DTNB_NM_-|	23.5752	-2.63186	1.24832	-2.10833	0.0350023	0.391474	6.94298	2.11518	0	7.5082	2.11189	16.0365	48.6009	57.1098	56.4308	40.0437	21.1189	24.8842	8.37987	29.817	-1.50204	0.91406	-2.4161	DTNB	-	-
chr15:62317792-62317842:mpeak_69975|chr15_62146757_62352664_VPS13C_NM_-|	27.5467	-5.35748	1.86733	-2.86906	0.00411693	0.267856	0	0	0	0	0	10.5067	61.0982	58.1674	94.3089	36.2896	47.5174	22.6723	#DIV/0!	29.602	-Inf	1.00417	-Inf	VPS13C	-	-
chr14:36773199-36773251:mpeak_60125|chr14_36768396_36789882_MBIP_NM_-|	21.2258	-4.67811	2.09538	-2.23259	0.0255762	0.35117	0	0	0	0	0	10.5067	20.8289	23.2669	93.5359	25.0273	17.951	63.593	#DIV/0!	29.5764	-Inf	0.368995	-Inf	MBIP	-	-
chr1:210013395-210013450:mpeak_18224|chr1_210001311_210024548_DIEXF_NM_+|	17.3937	-5.40031	2.07602	-2.60128	0.00928762	0.277708	0	0	0	1.25137	0	13.8246	15.2746	19.0366	82.7136	21.2732	10.5594	44.7916	#DIV/0!	29.5127	-Inf	0.610941	-Inf	DIEXF	-	-
chr11:67783789-67783839:mpeak_36156|chr11_67776016_67795216_ALDH3B1_NM_+|	16.1013	-4.1544	1.96594	-2.11319	0.0345842	0.390339	0	0	0	0	0	8.84772	16.6632	35.958	40.9703	28.7814	45.4055	16.5895	#DIV/0!	29.2401	-Inf	0.0440588	-Inf	ALDH3B1	-	-
chr15:68435896-68435961:mpeak_70826|chr15_68346571_68479879_PIAS1_NM_+|	18.8643	-4.36844	2.21256	-1.97438	0.048338	0.450068	0	0	0	0	0	9.95368	13.886	14.8062	85.0326	15.0164	16.8951	70.7817	#DIV/0!	29.0779	-Inf	0.147207	-Inf	PIAS1	-	-
chr8:41389779-41389829:mpeak_193536|chr8_41386724_41399509_GINS4_NM_+|	19.0309	-4.4817	2.14071	-2.09356	0.0362991	0.397498	0	0	0	0	0	9.4007	18.0518	8.46071	95.082	36.2896	29.5664	31.52	#DIV/0!	28.9621	-Inf	0.320439	-Inf	GINS4	-	-
chr15:30967134-30967184:mpeak_67020|chr15_30938317_31060060_LOC100288637_NR_+|	6.94694	-3.66396	1.73501	-2.11179	0.0347048	0.390493	0	0	0	2.50273	4.22377	6.63579	4.16579	9.5183	10.0493	20.0219	17.951	8.29473	#DIV/0!	28.8804	-Inf	-0.963084	-Inf	LOC100288637	-	-
chr6:33174125-33174175:mpeak_171827|chr6_33172413_33174414_HSD17B8_NM_+|	21.8465	-4.45269	1.94012	-2.29506	0.0217298	0.331202	0	0	0	0	0	12.1656	52.7667	46.5339	22.4177	52.5574	35.9021	39.8147	#DIV/0!	28.4522	-Inf	-0.0756849	-Inf	HSD17B8	-	-
chr6:126326414-126326466:mpeak_177339|chr6_126307575_126359850_TRMT11_NM_+|	20.1166	-4.35423	2.04	-2.13442	0.032808	0.383353	0	0	0	0	0	11.0596	19.4404	16.9214	77.3024	37.541	33.7902	45.3445	#DIV/0!	28.4369	-Inf	-0.0377265	-Inf	TRMT11	-	-
chr1:219367976-219368300:mpeak_18812|chr1_219347172_219384833_LYPLAL1_NM_+|	36.1138	-2.84829	1.16472	-2.44548	0.0144658	0.293974	2.77719	6.34553	0	15.0164	13.7273	15.4835	34.7149	54.9946	132.96	37.541	39.0699	80.7354	6.14546	28.1082	-2.2774	0.500962	-2.77836	LYPLAL1	-	-
chr15:62233268-62233318:mpeak_69960|chr15_62146757_62352664_VPS13C_NM_-|	27.5888	-4.3365	1.81514	-2.38907	0.0168911	0.307151	0	1.05759	0	0	0	9.95368	61.0982	58.1674	94.3089	36.2896	47.5174	22.6723	1.48555	28.044	-3.23445	1.00417	-4.23862	VPS13C	-	-
chr8:119107203-119107253:mpeak_198956|chr8_118812136_119124058_EXT1_NM_-|	22.1699	-4.60645	1.95189	-2.36	0.0182749	0.313389	0	0	0	0	0	11.0596	36.1035	31.7277	68.7991	33.7869	24.2867	60.2751	#DIV/0!	28.0349	-Inf	0.207234	-Inf	EXT1	-	-
chr6:107084008-107084058:mpeak_176042|chr6_107077440_107113656_QRSL1_NM_+|	24.5411	-4.78051	2.08979	-2.28755	0.0221635	0.333432	0	0	0	0	0	11.6126	29.1605	21.1518	107.45	37.541	19.007	68.5698	#DIV/0!	27.8441	-Inf	0.334469	-Inf	QRSL1	-	-
chr3:171395171-171395221:mpeak_143870|chr3_171321092_171528284_PLD1_NM_-|	8.67549	-4.0919	2.06954	-1.9772	0.048019	0.448825	0	0	0	0	1.05594	7.74175	8.33158	11.6335	27.8289	22.5246	21.1189	3.87088	#DIV/0!	27.7738	-Inf	0.0084646	-Inf	PLD1	-	-
chr17:67264070-67264120:mpeak_90787|chr17_67243785_67323323_ABCA5_NM_-|	28.0683	-4.89763	1.98259	-2.47032	0.0134992	0.293236	0	0	0	0	0	13.8246	51.3781	71.916	49.4735	23.776	85.5314	40.9207	#DIV/0!	27.6071	-Inf	0.201679	-Inf	ABCA5	-	-
chr6:144877273-144877346:mpeak_178718|chr6_144612872_145172124_UTRN_NM_+|	20.5189	-4.21723	1.99736	-2.1114	0.0347376	0.390684	0	0	0	0	0	11.6126	23.6061	27.4973	56.4308	26.2787	31.6783	69.1228	#DIV/0!	27.4142	-Inf	-0.240939	-Inf	UTRN	-	-
chr17:2222113-2222231:mpeak_82167|chr17_2207236_2226948_SRR_NM_+|	21.8468	-3.6174	1.60215	-2.25784	0.0239557	0.34238	0	2.11518	0	6.25683	0	13.2716	45.8237	35.958	51.7926	43.7978	21.1189	42.0267	4.75056	27.3908	-3.20672	0.320796	-3.52752	SRR	-	-
chr5:158692358-158692413:mpeak_167414|chr5_158690088_158711911_UBLCP1_NM_+|	20.9848	-4.60522	1.98239	-2.32306	0.0201757	0.321649	0	0	0	0	0	9.4007	22.2175	31.7277	85.0326	28.7814	23.2307	51.4273	#DIV/0!	27.2643	-Inf	0.426068	-Inf	UBLCP1	-	-
chr14:68223368-68223503:mpeak_63051|chr14_68215356_68283306_ZFYVE26_NM_-|	27.1629	-2.31007	1.02115	-2.26222	0.023684	0.341062	4.16579	5.28794	0	8.75956	12.6713	12.1656	65.264	56.0522	37.8782	27.5301	47.5174	48.6624	8.90772	27.1575	-1.82935	0.363828	-2.19318	ZFYVE26	-	-
chr9:6910897-6910947:mpeak_201928|chr9_6757640_7013787_KDM4C_NR_+mpeak_201928|chr9_6720862_7174552_KDM4C_NM_+||	10.0725	-4.04209	2.05866	-1.96346	0.0495927	0.454924	0	0	0	0	4.22377	6.63579	4.16579	9.5183	36.3321	7.5082	12.6713	39.8147	#DIV/0!	27.1515	-Inf	-0.262428	-Inf	KDM4C	-	-
chr14:71273051-71273108:mpeak_63479|chr14_71197581_71275888_MAP3K9_NM_-|	44.5074	-4.7419	1.93835	-2.44636	0.0144308	0.293828	0	1.05759	0	0	0	18.2484	115.254	75.0888	122.138	57.5628	38.0139	106.726	1.01535	27.0611	-4.10892	0.627251	-4.73617	MAP3K9	-	-
chr19:47870597-47870647:mpeak_100928|chr19_47852537_47885236_DHX34_NM_+|	17.6835	-4.31231	1.8815	-2.29196	0.0219081	0.33213	0	0	0	0	0	8.29473	26.3833	29.6125	55.6577	23.776	36.958	31.52	#DIV/0!	26.9736	-Inf	0.275347	-Inf	DHX34	-	-
chr3:78691885-78692007:mpeak_137448|chr3_78648077_79817059_ROBO1_NM_-|	38.5682	-2.46895	1.10829	-2.22771	0.0258999	0.352908	1.3886	8.46071	6.95722	1.25137	9.50349	9.95368	80.5386	93.0678	174.703	17.5191	16.8951	42.5796	4.82516	26.8963	-0.301204	2.17756	-2.47876	ROBO1	-	-
chr16:58220465-58220515:mpeak_78669|chr16_58192257_58231782_CSNK2A2_NM_-|	20.2831	-4.56073	1.90118	-2.39889	0.0164447	0.305408	0	0	0	0	0	8.84772	22.2175	46.5339	66.4801	28.7814	28.5105	42.0267	#DIV/0!	26.7253	-Inf	0.445296	-Inf	CSNK2A2	-	-
chr11:124537672-124537795:mpeak_40275|chr11_124507098_124546199_SIAE_NM_-|	27.7778	-2.97099	1.00768	-2.94834	0.00319482	0.267856	4.16579	3.17277	0	8.75956	9.50349	11.0596	56.9325	60.2825	69.5722	50.0546	32.7342	27.0961	5.89325	26.6849	-1.99845	0.765401	-2.76385	SIAE	-	-
chrX:122803484-122803534:mpeak_214336|chrX_122735189_122866904_THOC2_NM_-|	17.3244	-4.11451	1.92049	-2.14242	0.0321594	0.380814	0	0	0	0	0	8.84772	15.2746	37.0156	47.1545	33.7869	34.8461	30.967	#DIV/0!	26.6497	-Inf	-0.00225242	-Inf	THOC2	-	-
chr20:36697857-36697908:mpeak_122820|chr20_36661947_36718127_RPRD1B_NM_+|	15.4486	-3.87046	1.89787	-2.03937	0.0414129	0.42139	0	0	0	0	0	8.29473	27.7719	17.979	37.8782	23.776	34.8461	34.8379	#DIV/0!	26.6255	-Inf	-0.160343	-Inf	RPRD1B	-	-
chr3:52752530-52752580:mpeak_135678|chr3_52745885_52804965_NEK4_NM_-|	21.1932	-4.08937	2.05897	-1.98613	0.0470191	0.444201	0	0	0	0	0	12.1656	16.6632	26.4397	60.2959	23.776	35.9021	79.0765	#DIV/0!	26.3032	-Inf	-0.424316	-Inf	NEK4	-	-
chr2:213934302-213934352:mpeak_118053|chr2_213872808_214016333_IKZF2_NM_-|	31.4433	-4.3428	1.95047	-2.22654	0.0259778	0.353153	1.3886	0	0	0	0	11.0596	36.1035	51.8218	149.967	26.2787	33.7902	66.9109	1.75113	26.1293	-2.99361	0.905709	-3.89931	IKZF2	-	-
chr10:123941236-123941286:mpeak_30458|chr10_123748688_124013505_TACC2_NM_+|	26.7151	-4.79056	2.19174	-2.18574	0.0288348	0.365173	0	0	0	0	0	11.6126	13.886	24.3245	135.279	25.0273	26.3986	84.0533	#DIV/0!	25.7146	-Inf	0.356779	-Inf	TACC2	-	-
chr11:108215055-108215175:mpeak_39183|chr11_108093558_108236051_ATM_NM_+|	12.2972	-3.1678	1.5516	-2.04163	0.041188	0.420242	2.77719	0	0	2.50273	6.33566	5.52982	19.4404	31.7277	23.1907	22.5246	27.4545	6.0828	11.2046	25.6292	-2.37118	0.407481	-2.77866	ATM	-	-
chr5:176387350-176387401:mpeak_168231|chr5_176332493_176433795_UIMC1_NM_-|	31.6406	-5.86579	2.21802	-2.64461	0.00817859	0.273277	0	0	0	2.50273	0	24.8842	22.2175	21.1518	148.421	25.0273	11.6154	123.868	#DIV/0!	25.5936	-Inf	0.256857	-Inf	UIMC1	-	-
chr5:77522286-77522336:mpeak_161440|chr5_77298879_77590579_AP3B1_NM_-|	26.1967	-4.78082	2.22118	-2.15238	0.0313672	0.377091	0	0	0	0	0	11.0596	13.886	21.1518	138.371	26.2787	19.007	84.6063	#DIV/0!	25.5435	-Inf	0.416867	-Inf	AP3B1	-	-
chr3:57759669-57759719:mpeak_135981|chr3_57742982_57913022_SLMAP_NM_+|	18.27	-4.11845	2.07028	-1.98932	0.046666	0.442271	0	0	0	0	0	8.84772	13.886	22.2094	70.3452	26.2787	17.951	59.7221	#DIV/0!	25.5341	-Inf	0.0341326	-Inf	SLMAP	-	-
chr2:64243292-64243347:mpeak_107625|chr2_64120669_64246214_VPS54_NM_-|	15.4429	-2.20488	1.12342	-1.96265	0.0496868	0.455005	1.3886	1.05759	3.0921	6.25683	2.11189	7.18877	27.7719	29.6125	45.6084	25.0273	17.951	18.2484	5.37735	25.4096	-1.4901	0.75031	-2.24041	VPS54	-	-
chr17:67319558-67319608:mpeak_90799|chr17_67243785_67323323_ABCA5_NM_-|	27.9762	-4.78789	1.96301	-2.43905	0.014726	0.295484	0	0	0	0	0	12.7186	51.3781	71.916	49.4735	23.776	85.5314	40.9207	#DIV/0!	25.3986	-Inf	0.201679	-Inf	ABCA5	-	-
chr6:135700869-135700968:mpeak_177902|chr6_135606785_135818903_AHI1_NM_-|	24.0158	-5.39168	1.6985	-3.17438	0.00150159	0.267856	0	1.05759	0	6.25683	10.5594	3.31789	16.6632	48.6491	122.138	32.5355	34.8461	12.1656	1.69259	25.3109	-4.25079	1.23662	-5.48742	AHI1	-	-
chr13:67751507-67751557:mpeak_57000|chr13_66879160_67804468_PCDH9_NM_-|	7.88559	-4.29132	1.79431	-2.39163	0.0167739	0.306794	0	0	0	1.25137	2.11189	7.18877	11.1088	17.979	13.1414	7.5082	10.5594	23.7782	#DIV/0!	25.2164	-Inf	0.0131554	-Inf	PCDH9	-	-
chr12:28694284-28694334:mpeak_43175|chr12_28410132_28701995_CCDC91_NM_+|	11.3898	-4.70105	1.75206	-2.68315	0.00729315	0.270782	0	0	0	2.50273	1.05594	12.7186	13.886	23.2669	18.5526	25.0273	14.7832	24.8842	#DIV/0!	25.1601	-Inf	-0.215829	-Inf	CCDC91	-	-
chrX:118983897-118983947:mpeak_214195|chrX_118968990_118986991_UPF3B_NM_-|	22.7149	-4.38496	1.87527	-2.33832	0.0193708	0.316398	0	0	0	0	0	11.0596	43.0465	45.4763	40.9703	45.0492	31.6783	55.2982	#DIV/0!	25.1307	-Inf	-0.0279438	-Inf	UPF3B	-	-
chr7:2214384-2214562:mpeak_181087|chr7_1855864_2272583_MAD1L1_NM_-|	21.3437	-2.50441	1.18182	-2.11911	0.0340813	0.387683	1.3886	1.05759	3.0921	3.7541	4.22377	17.1424	37.4921	30.6701	57.2038	33.7869	24.2867	42.0267	4.41769	25.0952	-2.18134	0.3247	-2.50605	MAD1L1	-	-
chr20:9125073-9125123:mpeak_120981|chr20_9049700_9459567_PLCB4_NM_+|	16.7964	-3.94254	1.92633	-2.04666	0.0406914	0.418462	0	0	0	0	0	8.29473	20.8289	27.4973	45.6084	26.2787	22.1748	50.8744	#DIV/0!	25.0526	-Inf	-0.0805407	-Inf	PLCB4	-	-
chr15:62161550-62161602:mpeak_69951|chr15_62146757_62352664_VPS13C_NM_-|	29.6057	-2.60382	1.18663	-2.1943	0.0282139	0.36403	1.3886	1.05759	6.18419	2.50273	5.27971	18.8014	61.0982	58.1674	94.3089	36.2896	47.5174	22.6723	4.04092	24.9662	-1.62305	1.00417	-2.62722	VPS13C	-	-
chr11:9206418-9206489:mpeak_32009|chr11_9161401_9286873_DENND5A_NM_-|	16.2183	-5.00721	1.76429	-2.83808	0.00453857	0.267856	0	0	0	0	3.16783	9.95368	16.6632	31.7277	54.1117	31.2841	20.0629	27.6491	#DIV/0!	24.9155	-Inf	0.375804	-Inf	DENND5A	-	-
chr19:44023714-44023764:mpeak_100288|chr19_44011054_44031396_ETHE1_NM_-|	19.7927	-4.09326	1.9732	-2.07442	0.03804	0.407758	0	0	0	0	0	9.95368	38.8807	40.1884	28.6019	26.2787	20.0629	73.5466	#DIV/0!	24.9074	-Inf	-0.155061	-Inf	ETHE1	-	-
chr17:45889175-45889230:mpeak_87158|chr17_45885765_45899147_OSBPL7_NM_-|	14.1663	-3.07348	1.36541	-2.25096	0.0243879	0.344589	2.77719	1.05759	0	1.25137	6.33566	4.42386	30.5491	29.6125	45.6084	20.0219	20.0629	8.29473	5.43838	24.8264	-1.64713	1.12846	-2.77559	OSBPL7	-	-
chr2:168921588-168921645:mpeak_114692|chr2_168812080_169104105_STK39_NM_-|	37.2561	-2.9013	1.15954	-2.50211	0.0123456	0.29001	5.55439	3.17277	0	3.7541	11.6154	25.9902	58.3211	68.7432	102.812	58.8142	48.5734	59.7221	5.69468	24.75	-2.24464	0.460064	-2.7047	STK39	-	-
chr3:78776028-78776078:mpeak_137461|chr3_78648077_79817059_ROBO1_NM_-|	36.7579	-4.30689	1.56003	-2.76077	0.00576653	0.267856	0	3.17277	0	0	2.11189	10.5067	80.5386	93.0678	174.703	17.5191	16.8951	42.5796	2.73271	24.5836	-1.99173	2.17756	-4.16929	ROBO1	-	-
chr15:80256410-80256460:mpeak_72131|chr15_80253516_80263643_BCL2A1_NM_-|	19.0781	-4.13803	1.91486	-2.16101	0.0306948	0.373829	0	0	0	0	0	8.84772	18.0518	46.5339	46.3814	40.0437	24.2867	44.7916	#DIV/0!	24.3243	-Inf	0.0241904	-Inf	BCL2A1	-	-
chr1:70769013-70769063:mpeak_6371|chr1_70728530_70820417_ANKRD13C_NM_-|	23.3844	-4.77498	1.85453	-2.57477	0.0100307	0.28147	0	0	0	0	0	8.29473	70.8184	29.6125	69.5722	45.0492	28.5105	28.7551	#DIV/0!	24.3212	-Inf	0.732547	-Inf	ANKRD13C	-	-
chr3:141250754-141250804:mpeak_141548|chr3_141205888_141331124_RASA2_NM_+|	19.7788	-5.15481	1.883	-2.73755	0.00618991	0.268895	0	0	0	0	2.11189	14.3775	16.6632	38.0732	64.161	22.5246	27.4545	51.9803	#DIV/0!	24.2588	-Inf	0.221721	-Inf	RASA2	-	-
chr14:78288424-78288474:mpeak_64601|chr14_78266425_78399562_ADCK1_NM_+|	27.5952	-5.01885	1.92295	-2.60997	0.00905499	0.277333	0	0	0	0	0	9.4007	48.6009	57.1098	99.7201	63.8197	35.9021	16.5895	#DIV/0!	24.2471	-Inf	0.820662	-Inf	ADCK1	-	-
chr19:58709022-58709084:mpeak_102580|chr19_58694355_58723526_ZNF274_NM_+|	21.5472	-4.47125	1.90582	-2.3461	0.0189709	0.315087	0	0	0	0	0	8.84772	49.9895	56.0522	34.0131	55.0601	38.0139	16.5895	#DIV/0!	24.2042	-Inf	0.352907	-Inf	ZNF274	-	-
chr2:153247316-153247368:mpeak_113723|chr2_153191750_153504309_FMNL2_NM_+|	12.5959	-3.82015	1.63416	-2.33769	0.0194034	0.316697	0	0	0.773024	2.50273	3.16783	11.6126	12.4974	21.1518	27.8289	17.5191	25.3426	28.7551	3.7722	24.1329	-4.48271	-0.220228	-4.26248	FMNL2	-	-
chr15:67980685-67980735:mpeak_70797|chr15_67835020_68098983_MAP2K5_NM_+|	20.5071	-3.88037	1.89013	-2.05296	0.0400761	0.415976	0	0	0	0	0	11.0596	29.1605	27.4973	39.4242	38.7923	45.4055	54.7452	#DIV/0!	23.8795	-Inf	-0.532156	-Inf	MAP2K5	-	-
chr11:134209472-134209522:mpeak_40728|chr11_134201767_134245848_GLB1L2_NM_+|	11.1893	-4.026	1.82404	-2.20719	0.027301	0.360385	0	0	0	0	2.11189	8.84772	20.8289	23.2669	10.0493	26.2787	28.5105	14.3775	#DIV/0!	23.7678	-Inf	-0.353244	-Inf	GLB1L2	-	-
chr1:174354540-174354590:mpeak_15192|chr1_174128551_174958985_RABGAP1L_NM_+|	12.692	-4.2677	1.86475	-2.28861	0.022102	0.332731	0	0	0	0	1.05594	11.0596	16.6632	22.2094	24.7368	32.5355	27.4545	16.5895	#DIV/0!	23.7314	-Inf	-0.267721	-Inf	RABGAP1L	-	-
chrX:41774434-41774484:mpeak_211662|chrX_41379849_41782287_CASK_NM_-|	28.5606	-4.64002	2.0691	-2.24253	0.0249269	0.347055	0	0	0	0	0	12.7186	27.7719	27.4973	113.635	28.7814	43.2937	89.0301	#DIV/0!	23.6838	-Inf	0.0681982	-Inf	CASK	-	-
chr12:104478581-104478637:mpeak_50109|chr12_104458235_104496736_HCFC2_NM_+|	16.5409	-3.23641	1.51402	-2.13762	0.0325475	0.382347	0	2.11518	0	1.25137	7.3916	13.8246	34.7149	20.0942	23.9637	42.5464	22.1748	30.414	8.05548	23.6164	-3.40899	-0.272282	-3.13671	HCFC2	-	-
chr3:79622648-79622698:mpeak_137557|chr3_78648077_79817059_ROBO1_NM_-|	36.4516	-6.70434	1.80023	-3.72417	0.000195961	0.257152	0	0	0	0	1.05594	11.0596	80.5386	93.0678	174.703	17.5191	16.8951	42.5796	#DIV/0!	23.6037	-Inf	2.17756	-Inf	ROBO1	-	-
chr4:282302-282473:mpeak_146243|chr4_266419_289944_ZNF732_NM_-|	12.3925	-4.04459	1.69894	-2.38065	0.0172819	0.308962	0	0	0	0	6.33566	6.0828	22.2175	12.6911	22.4177	27.5301	34.8461	16.5895	#DIV/0!	23.5896	-Inf	-0.462028	-Inf	ZNF732	-	-
chr1:219348530-219348647:mpeak_18801|chr1_219347172_219384833_LYPLAL1_NM_+|	35.4	-2.97353	1.23391	-2.40984	0.0159596	0.301916	5.55439	2.11518	0	8.75956	8.44754	19.9074	34.7149	54.9946	132.96	37.541	39.0699	80.7354	5.16655	23.5878	-2.27477	0.500962	-2.77573	LYPLAL1	-	-
chr6:42627758-42627808:mpeak_172897|chr6_42531759_42658769_UBR2_NM_+|	23.3314	-4.41848	2.08105	-2.1232	0.033737	0.386956	0	0	0	0	0	9.95368	16.6632	28.5549	98.1741	25.0273	26.3986	75.2056	#DIV/0!	23.5811	-Inf	0.179329	-Inf	UBR2	-	-
chr3:141004980-141005030:mpeak_141468|chr3_140950666_141011109_PXYLP1_NM_+|	18.6246	-3.95862	1.96445	-2.01513	0.0438912	0.43278	0	0	0	0	0	8.84772	19.4404	22.2094	60.2959	26.2787	31.6783	54.7452	#DIV/0!	23.5516	-Inf	-0.144717	-Inf	PXYLP1	-	-
chr9:111753859-111753909:mpeak_206805|chr9_111705151_111775874_CTNNAL1_NM_-|	23.319	-4.63449	2.1435	-2.16211	0.0306097	0.373642	0	0	0	0	0	8.29473	9.72018	22.2094	133.733	25.0273	32.7342	48.1095	#DIV/0!	23.5043	-Inf	0.645941	-Inf	CTNNAL1	-	-
chr8:75162548-75162598:mpeak_195340|chr8_75149270_75233562_JPH1_NM_-|	22.3186	-4.47698	1.89495	-2.36258	0.0181481	0.313389	0	0	0	0	0	8.84772	38.8807	31.7277	74.9833	42.5464	22.1748	48.6624	#DIV/0!	23.41	-Inf	0.360715	-Inf	JPH1	-	-
chr9:132777307-132777357:mpeak_209268|chr9_132652825_132805473_FNBP1_NM_-|	31.9471	-5.19616	1.96463	-2.64486	0.00817245	0.273277	0	0	0	0	0	9.95368	38.8807	46.5339	160.016	27.5301	39.0699	61.381	#DIV/0!	23.3324	-Inf	0.939386	-Inf	FNBP1	-	-
chr18:44457349-44457399:mpeak_94593|chr18_44392575_44497495_PIAS2_NM_-|	18.9163	-4.07129	1.98703	-2.04893	0.0404689	0.417526	0	0	0	0	0	8.29473	20.8289	21.1518	69.5722	31.2841	21.1189	54.7452	#DIV/0!	23.2241	-Inf	0.0581195	-Inf	PIAS2	-	-
chr18:44474124-44474174:mpeak_94595|chr18_44392575_44497495_PIAS2_NM_-|	18.9163	-4.07129	1.98703	-2.04893	0.0404689	0.417526	0	0	0	0	0	8.29473	20.8289	21.1518	69.5722	31.2841	21.1189	54.7452	#DIV/0!	23.2241	-Inf	0.0581195	-Inf	PIAS2	-	-
chr9:137605347-137605397:mpeak_209794|chr9_137533650_137734002_COL5A1_NM_+|	14.8106	-4.64335	1.96757	-2.35994	0.0182778	0.313389	0	0	0	0	1.05594	11.0596	19.4404	50.7642	16.2335	37.541	31.6783	9.95368	#DIV/0!	22.954	-Inf	0.12666	-Inf	COL5A1	-	-
chr1:40839841-40839899:mpeak_4011|chr1_40839377_40887647_SMAP2_NM_+|	22.2312	-3.52004	1.42473	-2.47068	0.0134857	0.293236	2.77719	0	0	16.2678	8.44754	3.31789	31.9377	31.7277	49.4735	33.7869	34.8461	54.1923	7.36403	22.8236	-3.33544	-0.118512	-3.21692	SMAP2	-	-
chr6:25310545-25310685:mpeak_170661|chr6_25279655_25619674_LRRC16A_NM_+|	13.2775	-3.81184	1.80127	-2.1162	0.034328	0.388705	0	1.05759	0	1.25137	5.27971	10.5067	12.4974	13.7486	40.1973	15.0164	10.5594	49.2154	4.77515	22.7804	-4.00988	-0.170746	-3.83914	LRRC16A	-	-
chr11:10041485-10041535:mpeak_32137|chr11_9802063_10315754_SBF2_NM_-|	14.8585	-4.76771	2.13124	-2.23706	0.0252822	0.349352	0	0	0	0	3.16783	7.18877	9.72018	16.9214	72.6643	7.5082	5.27971	55.8512	#DIV/0!	22.6327	-Inf	0.532848	-Inf	SBF2	-	-
chr6:155631552-155631658:mpeak_179972|chr6_155579216_155635617_TFB1M_NM_-|	18.9661	-3.6854	1.8735	-1.96712	0.0491695	0.453029	0	1.05759	0	10.0109	0	7.18877	12.4974	11.6335	71.1182	31.2841	26.3986	56.4042	3.33102	22.6139	-4.02353	-0.260357	-3.76318	TFB1M	-	-
chr17:49334589-49334639:mpeak_87608|chr17_49258055_49337427_MBTD1_NM_-|	16.4782	-2.72158	1.38243	-1.96869	0.0489884	0.45229	0	2.11518	1.54605	2.50273	5.27971	7.18877	29.1605	20.0942	63.388	11.2623	13.7273	41.4737	4.87545	22.5256	-2.03179	0.761125	-2.79292	MBTD1	-	-
chr3:142229775-142229825:mpeak_141767|chr3_142168444_142297668_ATR_NM_-|	27.7487	-4.64246	1.91678	-2.42201	0.015435	0.299755	0	0	0	0	0	11.0596	30.5491	44.4187	98.9471	46.3005	47.5174	54.1923	#DIV/0!	22.4166	-Inf	0.232685	-Inf	ATR	-	-
chr16:57784185-57784235:mpeak_78641|chr16_57769659_57790725_KATNB1_NM_+|	24.3451	-3.94239	1.94003	-2.03213	0.0421407	0.424846	0	0	0	0	0	12.7186	40.2693	28.5549	40.1973	41.2951	41.1818	87.9242	#DIV/0!	22.3918	-Inf	-0.644322	-Inf	KATNB1	-	-
chr3:53327125-53327175:mpeak_135765|chr3_53321678_53381654_DCP1A_NM_-|	24.0491	-4.10201	1.97791	-2.07391	0.0380876	0.407758	0	0	0	0	0	11.6126	26.3833	37.0156	57.9768	33.7869	31.6783	90.1361	#DIV/0!	22.3892	-Inf	-0.358374	-Inf	DCP1A	-	-
chr15:40271766-40271816:mpeak_67502|chr15_40226324_40327227_EIF2AK4_NM_+|	22.6995	-4.12177	1.8846	-2.18707	0.0287372	0.364579	0	0	0	0	0	10.5067	40.2693	29.6125	51.0196	42.5464	34.8461	63.593	#DIV/0!	22.3569	-Inf	-0.221716	-Inf	EIF2AK4	-	-
chr11:73781947-73781997:mpeak_37040|chr11_73724570_73882064_C2CD3_NM_-|	13.9214	-3.26635	1.43028	-2.28372	0.022388	0.334356	0	1.05759	0.773024	6.25683	3.16783	4.97684	16.6632	26.4397	43.2893	16.2678	22.1748	25.9902	3.17843	22.3512	-2.97582	0.423108	-3.39893	C2CD3	-	-
chr17:62531612-62531662:mpeak_90138|chr17_62503157_62533720_CEP95_NM_+|	32.8332	-4.89882	2.23004	-2.19674	0.0280393	0.363459	0	0	0	0	0	12.1656	9.72018	37.0156	170.838	31.2841	29.5664	103.408	#DIV/0!	22.2192	-Inf	0.405541	-Inf	CEP95	-	-
chr7:23230564-23230614:mpeak_182444|chr7_23221445_23239786_NUPL2_NM_+|	9.83461	-4.13251	1.64643	-2.50999	0.0120736	0.289771	0	0	0	3.7541	2.11189	7.74175	8.33158	13.7486	20.8716	18.7705	21.1189	21.5663	#DIV/0!	22.1424	-Inf	-0.516825	-Inf	NUPL2	-	-
chr1:219354815-219354865:mpeak_18805|chr1_219347172_219384833_LYPLAL1_NM_+|	32.7001	-4.00889	1.92542	-2.08208	0.0373352	0.403395	0	0	0.773024	0	0	11.6126	34.7149	54.9946	132.96	37.541	39.0699	80.7354	1.04149	22.1409	-3.90904	0.500962	-4.41	LYPLAL1	-	-
chr14:67068338-67068388:mpeak_62828|chr14_66974124_67647520_GPHN_NM_+|	22.5869	-4.33626	1.98063	-2.18934	0.0285724	0.3645	0	0	0	0	0	8.84772	29.1605	28.5549	84.2596	20.0219	32.7342	67.4638	#DIV/0!	22.0788	-Inf	0.239961	-Inf	GPHN	-	-
chr17:65517475-65517525:mpeak_90482|chr17_65373396_65688687_PITPNC1_NM_+|	36.9781	-5.17568	2.25567	-2.29452	0.0217607	0.331202	0	0	0	0	0	12.1656	15.2746	24.3245	226.496	28.7814	32.7342	103.961	#DIV/0!	22.0556	-Inf	0.685317	-Inf	PITPNC1	-	-
chr9:132803055-132803105:mpeak_209272|chr9_132652825_132805473_FNBP1_NM_-|	31.901	-5.12203	1.95392	-2.62142	0.00875656	0.275065	0	0	0	0	0	9.4007	38.8807	46.5339	160.016	27.5301	39.0699	61.381	#DIV/0!	22.0362	-Inf	0.939386	-Inf	FNBP1	-	-
chr3:45656535-45656680:mpeak_134817|chr3_45636322_45718413_LIMD1_NM_+|	29.2559	-3.15143	1.5948	-1.97606	0.048148	0.449251	2.77719	1.05759	0	0	3.16783	16.5895	54.1553	34.9004	103.585	33.7869	26.3986	74.6526	2.98596	21.9789	-2.36517	0.514686	-2.87986	LIMD1	-	-
chr13:101273996-101274046:mpeak_58250|chr13_101257396_101327189_TMTC4_NM_-|	25.6323	-3.95884	1.99826	-1.98114	0.0475751	0.446522	0	0	0	0	0	13.2716	19.4404	31.7277	61.8419	42.5464	47.5174	91.2421	#DIV/0!	21.96	-Inf	-0.681977	-Inf	TMTC4	-	-
chr8:56677879-56677937:mpeak_194236|chr8_56652777_56685966_TMEM68_NM_-|	15.7804	-4.36679	1.88145	-2.32097	0.0202887	0.32212	0	0	0	1.25137	0	13.2716	22.2175	20.0942	33.24	23.776	28.5105	47.0035	#DIV/0!	21.9402	-Inf	-0.394182	-Inf	TMEM68	-	-
chr11:76224192-76224247:mpeak_37377|chr11_76156068_76260995_C11orf30_NM_+|	33.1288	-5.81903	1.86861	-3.11409	0.0018451	0.267856	0	0	0	0	4.22377	19.3544	34.7149	46.5339	131.414	40.0437	31.6783	89.5831	#DIV/0!	21.9257	-Inf	0.398776	-Inf	C11orf30	-	-
chr5:54710025-54710076:mpeak_159466|chr5_54603575_54720547_SKIV2L2_NM_+|	32.9644	-4.70977	2.0809	-2.26333	0.0236151	0.341062	0	0	0	0	0	13.8246	19.4404	48.6491	124.457	52.5574	33.7902	102.855	#DIV/0!	21.9203	-Inf	0.0252761	-Inf	SKIV2L2	-	-
chr1:10584208-10584287:mpeak_954|chr1_10535002_10689587_PEX14_NM_+|	24.2221	-4.25048	1.92527	-2.20773	0.0272631	0.360098	0	0	0	0	0	10.5067	31.9377	50.7642	53.3387	27.5301	36.958	79.6294	#DIV/0!	21.871	-Inf	-0.083208	-Inf	PEX14	-	-
chr16:53500308-53500358:mpeak_78377|chr16_53468350_53524041_RBL2_NM_+|	24.6721	-4.46252	1.9371	-2.30371	0.0212388	0.328955	0	0	0	0	0	9.4007	36.1035	35.958	85.0326	31.2841	26.3986	71.8877	#DIV/0!	21.7658	-Inf	0.277893	-Inf	RBL2	-	-
chr20:43162353-43162403:mpeak_123280|chr20_43160421_43246925_PKIG_NM_+|	21.3661	-4.14934	1.92822	-2.1519	0.0314054	0.377262	0	0	0	0	0	8.84772	54.1553	46.5339	24.7368	68.8251	30.6223	22.6723	#DIV/0!	21.7353	-Inf	0.0385391	-Inf	PKIG	-	-
chr10:94700624-94700674:mpeak_27887|chr10_94594469_94817979_EXOC6_NM_+|	26.7752	-4.59183	1.95269	-2.35155	0.0186955	0.314942	0	0	0	0	0	9.95368	24.9947	40.1884	108.223	37.541	40.1258	60.2751	#DIV/0!	21.6476	-Inf	0.330097	-Inf	EXOC6	-	-
chr2:71361360-71361410:mpeak_108284|chr2_71357443_71376995_MPHOSPH10_NM_+|	23.9378	-4.28397	1.9162	-2.23566	0.0253738	0.350027	0	0	0	0	0	9.95368	26.3833	45.4763	67.2531	62.5683	49.6293	25.9902	#DIV/0!	21.609	-Inf	0.00962437	-Inf	MPHOSPH10	-	-
chr12:48088975-48089025:mpeak_44511|chr12_48057373_48099844_RPAP3_NM_-|	24.8945	-4.35683	1.85708	-2.34606	0.018973	0.315087	0	0	0	0	0	9.95368	38.8807	47.5915	61.8419	46.3005	31.6783	62.487	#DIV/0!	21.2586	-Inf	0.0784366	-Inf	RPAP3	-	-
chr3:108309102-108309174:mpeak_138623|chr3_108308336_108412206_DZIP3_NM_+|	15.2214	-4.27404	1.74167	-2.45399	0.014128	0.293619	1.3886	0	0	1.25137	1.05594	12.7186	26.3833	41.2459	27.0558	31.2841	25.3426	14.9305	4.39962	20.9984	-3.43575	0.404039	-3.83979	DZIP3	-	-
chr10:21930247-21930382:mpeak_22750|chr10_21823100_22030867_MLLT10_NM_+|	13.3881	-4.45805	1.95605	-2.27911	0.0226605	0.336034	0	0	0	1.25137	0	8.29473	11.1088	16.9214	54.8847	17.5191	15.8391	34.8379	#DIV/0!	20.997	-Inf	0.281941	-Inf	MLLT10	-	-
chr18:59909905-59910040:mpeak_95335|chr18_59854523_59972646_KIAA1468_NM_+|	17.2938	-3.45544	1.39272	-2.48108	0.0130984	0.291744	1.3886	1.05759	0	2.50273	7.3916	7.18877	31.9377	24.3245	50.2466	25.0273	22.1748	34.2849	3.44505	20.9642	-2.80396	0.386331	-3.1903	KIAA1468	-	-
chr3:42218744-42218794:mpeak_134516|chr3_42132745_42264433_TRAK1_NM_+|	24.9288	-4.35705	1.95401	-2.2298	0.0257604	0.352465	0	0	0	0	0	9.4007	36.1035	34.9004	82.7136	26.2787	29.5664	80.1824	#DIV/0!	20.7326	-Inf	0.176383	-Inf	TRAK1	-	-
chr6:38266486-38266536:mpeak_172600|chr6_38142958_38607924_BTBD9_NM_-|	28.3007	-4.40469	1.87669	-2.34705	0.0189228	0.315087	0	0	0	0	0	11.6126	44.4351	78.2615	37.1052	52.5574	57.0209	58.6161	#DIV/0!	20.7129	-Inf	-0.0738462	-Inf	BTBD9	-	-
chr7:87019487-87019537:mpeak_185982|chr7_86974950_87027839_CROT_NM_+|	25.536	-4.15993	1.88354	-2.20858	0.0272041	0.35978	0	0	0	0	0	11.0596	63.8754	40.1884	30.921	55.0601	41.1818	64.1459	#DIV/0!	20.6867	-Inf	-0.248768	-Inf	CROT	-	-
chr6:119176499-119176549:mpeak_176934|chr6_119137457_119256327_MCM9_NM_-|	35.0995	-3.97316	1.8335	-2.16698	0.0302363	0.372039	0	1.05759	0	0	0	12.1656	108.311	65.5705	57.2038	55.0601	78.1398	43.6856	1.37299	20.633	-3.52396	0.385607	-3.90957	MCM9	-	-
chr20:45352492-45352542:mpeak_123554|chr20_45338278_45362394_SLC2A10_NM_+|	28.2088	-4.57069	2.16213	-2.11398	0.0345173	0.390056	0	0	0	0	0	9.95368	19.4404	27.4973	136.825	22.5246	22.1748	100.09	#DIV/0!	20.6238	-Inf	0.343892	-Inf	SLC2A10	-	-
chr10:11578694-11578744:mpeak_21675|chr10_11505848_11653788_USP6NL_NM_-|	23.5041	-4.3533	1.96	-2.22107	0.026346	0.354816	0	0	0	0	0	8.29473	27.7719	33.8428	91.2168	31.2841	22.1748	67.4638	#DIV/0!	20.5786	-Inf	0.337857	-Inf	USP6NL	-	-
chr3:79313571-79313621:mpeak_137509|chr3_78648077_79817059_ROBO1_NM_-|	36.9647	-5.0362	1.46411	-3.43978	0.000582197	0.267856	1.3886	1.05759	0	2.50273	10.5594	2.76491	80.5386	93.0678	174.703	17.5191	16.8951	42.5796	1.05345	20.5563	-2.69379	2.17756	-4.87135	ROBO1	-	-
chr12:39742156-39742206:mpeak_43762|chr12_39688319_39837192_KIF21A_NM_-|	32.1846	-5.10042	1.94485	-2.62253	0.00872805	0.275048	0	0	0	0	0	8.29473	44.4351	44.4187	167.746	43.7978	21.1189	56.4042	#DIV/0!	20.5111	-Inf	1.08069	-Inf	KIF21A	-	-
chr11:27431285-27431335:mpeak_33096|chr11_27390690_27494334_LGR4_NM_-|	34.4216	-4.04674	1.96878	-2.05545	0.0398353	0.415048	1.3886	0	0	0	0	10.5067	38.8807	38.0732	170.065	33.7869	39.0699	81.2884	1.68642	20.4483	-2.91961	0.680333	-3.59994	LGR4	-	-
chr11:3818160-3818210:mpeak_31716|chr11_3697606_3819022_NUP98_NM_-|	28.4683	-4.41592	2.12905	-2.07413	0.0380671	0.407758	0	0	0	0	0	11.0596	34.7149	23.2669	109.769	28.7814	19.007	115.02	#DIV/0!	20.3791	-Inf	0.0431459	-Inf	NUP98	-	-
chr19:21123129-21123236:mpeak_98316|chr19_21106058_21125606_ZNF85_NR_+mpeak_98316|chr19_21106058_21131549_ZNF85_NM_+||	9.59079	-3.40876	1.65214	-2.06324	0.0390903	0.412276	0	1.05759	0	1.25137	2.11189	6.63579	20.8289	17.979	15.4605	13.765	22.1748	13.8246	5.84643	20.0928	-3.24101	0.125	-3.36601	ZNF85	-	-
chr3:79654689-79654739:mpeak_137568|chr3_78648077_79817059_ROBO1_NM_-|	36.389	-5.48038	1.62627	-3.3699	0.000751948	0.267856	0	1.05759	0	0	4.22377	6.0828	80.5386	93.0678	174.703	17.5191	16.8951	42.5796	0.910903	20.0794	-3.28471	2.17756	-5.46227	ROBO1	-	-
chr12:48075201-48075251:mpeak_44504|chr12_48057373_48099844_RPAP3_NM_-|	24.8484	-4.28447	1.84356	-2.32402	0.0201245	0.321426	0	0	0	0	0	9.4007	38.8807	47.5915	61.8419	46.3005	31.6783	62.487	#DIV/0!	20.0775	-Inf	0.0784366	-Inf	RPAP3	-	-
chr8:133802002-133802052:mpeak_200387|chr8_133787603_133858025_PHF20L1_NM_+|	31.2628	-4.68569	1.849	-2.53418	0.0112712	0.288014	0	0	0	0	0	11.0596	51.3781	62.3977	85.0326	50.0546	42.2377	72.9937	#DIV/0!	20.0736	-Inf	0.266414	-Inf	PHF20L1	-	-
chr7:132603546-132603599:mpeak_189300|chr7_132470421_132766828_CHCHD3_NM_-|	47.4743	-4.29668	2.17374	-1.97663	0.0480833	0.449081	0	1.05759	0	0	0	16.0365	45.8237	26.4397	240.41	52.5574	25.3426	162.024	1.01472	20.052	-3.92251	0.382082	-4.30459	CHCHD3	-	-
chr2:204319438-204319488:mpeak_117439|chr2_204306136_204400058_RAPH1_NM_-|	29.8414	-4.55026	2.11422	-2.15221	0.0313805	0.377091	0	0	0	0	0	10.5067	27.7719	25.3821	135.279	36.2896	21.1189	101.749	#DIV/0!	19.8043	-Inf	0.243601	-Inf	RAPH1	-	-
chr11:116919390-116919440:mpeak_39617|chr11_116716345_116969131_SIK3_NM_-|	30.4705	-4.72544	1.81836	-2.59874	0.00935668	0.277708	0	0	0	0	0	9.95368	79.15	72.9736	52.5656	62.5683	35.9021	52.5333	#DIV/0!	19.775	-Inf	0.438852	-Inf	SIK3	-	-
chr3:79616716-79616766:mpeak_137555|chr3_78648077_79817059_ROBO1_NM_-|	36.9107	-5.01757	1.45814	-3.44108	0.000579406	0.267856	1.3886	1.05759	0	1.25137	9.50349	4.42386	80.5386	93.0678	174.703	17.5191	16.8951	42.5796	1.05345	19.7142	-2.63344	2.17756	-4.811	ROBO1	-	-
chr19:32908634-32908684:mpeak_98858|chr19_32896654_32972984_DPY19L3_NM_+|	34.833	-4.90511	1.95165	-2.51332	0.0119602	0.289771	0	0	0	0	0	11.0596	41.6579	42.3035	154.605	57.5628	42.2377	68.5698	#DIV/0!	19.7059	-Inf	0.502752	-Inf	DPY19L3	-	-
chr9:88941886-88941936:mpeak_204881|chr9_88903659_88969402_ZCCHC6_NM_-|	23.7582	-4.14903	2.06229	-2.01186	0.0442352	0.433229	0	0	0	0	0	8.84772	13.886	30.6701	96.628	27.5301	29.5664	77.9705	#DIV/0!	19.6518	-Inf	0.0639023	-Inf	ZCCHC6	-	-
chr3:79781739-79781791:mpeak_137573|chr3_78648077_79817059_ROBO1_NM_-|	36.7027	-6.86849	1.62487	-4.2271	2.36724e-05	0.257152	0	0	0	1.25137	10.5594	3.31789	80.5386	93.0678	174.703	17.5191	16.8951	42.5796	#DIV/0!	19.6492	-Inf	2.17756	-Inf	ROBO1	-	-
chr1:1048640-1048693:mpeak_113|chr1_1018367_1051736_C1orf159_NM_-|	20.2828	-4.52074	1.75971	-2.56902	0.0101987	0.282643	1.3886	0	0	1.25137	14.7832	1.65895	47.2123	57.1098	29.3749	42.5464	35.9021	12.1656	3.11584	19.5262	-3.67152	0.561159	-4.23268	C1orf159	-	-
chr8:56682936-56682986:mpeak_194237|chr8_56652777_56685966_TMEM68_NM_-|	15.6421	-4.20464	1.85332	-2.2687	0.0232864	0.339779	0	0	0	1.25137	0	11.6126	22.2175	20.0942	33.24	23.776	28.5105	47.0035	#DIV/0!	19.434	-Inf	-0.394182	-Inf	TMEM68	-	-
chr8:74376616-74376666:mpeak_195241|chr8_74333700_74659943_STAU2_NM_-|	21.7218	-5.35596	1.77655	-3.01481	0.00257138	0.267856	0	0	0	0	1.05594	9.95368	62.4868	64.5129	37.1052	28.7814	39.0699	17.6954	#DIV/0!	19.3046	-Inf	0.939834	-Inf	STAU2	-	-
chr2:225731940-225731993:mpeak_118900|chr2_225630554_225907330_DOCK10_NM_-|	21.8519	-4.466	1.788	-2.49777	0.0124977	0.290215	0	0	0	0	9.50349	9.4007	27.7719	12.6911	55.6577	25.0273	47.5174	74.6526	#DIV/0!	19.2641	-Inf	-0.614832	-Inf	DOCK10	-	-
chr3:136149299-136149354:mpeak_141061|chr3_136057119_136471245_STAG1_NM_-|	19.7628	-4.05938	1.73586	-2.33854	0.0193592	0.316393	0	1.05759	0	0	4.22377	7.18877	29.1605	28.5549	78.0754	32.5355	12.6713	43.6856	2.33651	19.2579	-3.43177	0.611254	-4.04302	STAG1	-	-
chr2:48562721-48562785:mpeak_106676|chr2_48541794_48602058_FOXN2_NM_+|	12.5837	-3.76957	1.71013	-2.20426	0.0275062	0.361447	0	1.05759	0	1.25137	3.16783	7.74175	20.8289	9.5183	44.0624	16.2678	21.1189	25.9902	4.26392	19.1883	-3.52341	0.231535	-3.75494	FOXN2	-	-
chr15:67972120-67972170:mpeak_70794|chr15_67835020_68098983_MAP2K5_NM_+|	20.3227	-3.59767	1.83445	-1.96118	0.0498585	0.455956	0	0	0	0	0	8.84772	29.1605	27.4973	39.4242	38.7923	45.4055	54.7452	#DIV/0!	19.1036	-Inf	-0.532156	-Inf	MAP2K5	-	-
chr15:101813778-101813830:mpeak_73956|chr15_101811850_101817725_VIMP_NM_-|	17.6342	-3.62047	1.50102	-2.412	0.0158651	0.300782	1.3886	1.05759	0	1.25137	3.16783	8.84772	51.3781	23.2669	51.7926	27.5301	13.7273	28.2021	2.90205	19.1002	-2.43923	0.864184	-3.30341	VIMP	-	-
chr3:57749444-57749494:mpeak_135976|chr3_57742982_57913022_SLMAP_NM_+|	18.6303	-4.65101	1.9309	-2.40872	0.0160084	0.301916	0	0	0	0	2.11189	11.0596	13.886	22.2094	70.3452	26.2787	17.951	59.7221	#DIV/0!	19.0062	-Inf	0.0341326	-Inf	SLMAP	-	-
chr2:3468206-3468301:mpeak_102898|chr2_3383445_3482989_TRAPPC12_NM_+|	42.7372	-2.39	1.01416	-2.35662	0.0184419	0.313394	2.77719	6.34553	0.773024	3.7541	16.8951	18.8014	66.6526	82.4919	106.677	71.3279	63.3566	72.9937	3.86822	18.996	-1.99517	0.30079	-2.29596	TRAPPC12	-	-
chr17:55336706-55336756:mpeak_87817|chr17_55333930_55756909_MSI2_NM_+|	31.5469	-4.91886	1.80881	-2.71939	0.00654021	0.269946	0	0	0	0	0	8.29473	106.922	71.916	60.2959	65.071	29.5664	36.4968	#DIV/0!	18.9761	-Inf	0.866773	-Inf	MSI2	-	-
chr8:74636741-74636791:mpeak_195280|chr8_74333700_74659943_STAU2_NM_-|	21.7041	-5.30132	1.70114	-3.11633	0.00183118	0.267856	0	0	0	2.50273	0	8.29473	62.4868	64.5129	37.1052	28.7814	39.0699	17.6954	#DIV/0!	18.9326	-Inf	0.939834	-Inf	STAU2	-	-
chr2:48131586-48131636:mpeak_106668|chr2_48035386_48132932_FBXO11_NM_-|	31.0612	-4.39517	1.98103	-2.21863	0.0265119	0.355603	0	0	0	0	0	11.6126	33.3263	31.7277	111.315	47.5519	45.4055	91.7951	#DIV/0!	18.8565	-Inf	-0.0669934	-Inf	FBXO11	-	-
chr10:28510614-28510664:mpeak_23297|chr10_28343173_28571067_MPP7_NM_-|	27.4281	-4.15981	2.07195	-2.00768	0.0446774	0.434562	0	0	0	0	0	10.5067	44.4351	13.7486	92.7629	30.0328	35.9021	101.749	#DIV/0!	18.7973	-Inf	-0.151703	-Inf	MPP7	-	-
chr9:3428646-3428696:mpeak_201576|chr9_3225280_3526001_RFX3_NM_-|	18.7856	-5.08224	1.92444	-2.64089	0.00826891	0.273277	0	0	0	0	1.05594	8.29473	16.6632	23.2669	101.266	18.7705	29.5664	26.5431	#DIV/0!	18.7313	-Inf	0.915049	-Inf	RFX3	-	-
chr9:135538950-135539005:mpeak_209612|chr9_135470499_135545788_DDX31_NM_-|	17.989	-3.62967	1.83997	-1.97268	0.0485322	0.450593	0	0	0.773024	0	1.05594	11.6126	18.0518	26.4397	56.4308	46.3005	25.3426	29.861	2.29788	18.7212	-4.0346	-0.00829575	-4.0263	DDX31	-	-
chr13:51977045-51977095:mpeak_56639|chr13_51939981_52027275_INTS6_NM_-|	29.6576	-4.12701	1.98874	-2.07518	0.0379696	0.407388	0	0	0	0	0	12.1656	43.0465	35.958	69.5722	48.8033	27.4545	118.891	#DIV/0!	18.702	-Inf	-0.393368	-Inf	INTS6	-	-
chr17:5240622-5240672:mpeak_82648|chr17_5185557_5286888_RABEP1_NM_+|	39.6696	-5.00663	1.8475	-2.70994	0.0067295	0.269946	0	0	0	0	0	12.1656	63.8754	82.4919	122.138	70.0765	51.7412	73.5466	#DIV/0!	18.6814	-Inf	0.458783	-Inf	RABEP1	-	-
chr14:104270347-104270492:mpeak_66511|chr14_104201532_104313927_PPP1R13B_NM_-|	25.921	-2.40795	1.15687	-2.08142	0.0373951	0.403749	1.3886	4.23035	0	7.5082	9.50349	7.18877	30.5491	38.0732	82.7136	37.541	34.8461	57.5102	5.56935	18.6305	-2.10666	0.220383	-2.32704	PPP1R13B	-	-
chr8:25096481-25096531:mpeak_192614|chr8_25042286_25268709_DOCK5_NM_+|	11.6851	-3.37202	1.60853	-2.09634	0.0360521	0.396555	1.3886	0	0	2.50273	4.22377	5.52982	18.0518	14.8062	27.8289	16.2678	14.7832	34.8379	6.8644	18.6015	-3.14183	-0.11865	-3.02318	DOCK5	-	-
chr2:70051727-70051777:mpeak_108098|chr2_69969126_70052587_ANXA4_NM_+|	57.5468	-5.63325	2.11506	-2.6634	0.00773543	0.272967	0	0	0	0	0	14.9305	68.0412	54.9946	311.529	45.0492	41.1818	154.835	#DIV/0!	18.5806	-Inf	0.850142	-Inf	ANXA4	-	-
chr6:12061364-12061488:mpeak_169746|chr6_12012723_12163515_HIVEP1_NM_+|	28.6825	-3.36849	1.36623	-2.46555	0.0136805	0.293236	1.3886	2.11518	0	8.75956	5.27971	11.6126	27.7719	33.8428	114.408	33.7869	31.6783	73.5466	2.98579	18.453	-2.87208	0.340551	-3.21264	HIVEP1	-	-
chr4:44696191-44696242:mpeak_149056|chr4_44680432_44700560_GUF1_NM_+|	21.2569	-5.03971	1.72979	-2.91348	0.00357421	0.267856	0	0	0	0	2.11189	10.5067	56.9325	43.3611	39.4242	50.0546	31.6783	21.0133	#DIV/0!	18.4219	-Inf	0.44343	-Inf	GUF1	-	-
chr3:65492207-65492257:mpeak_136730|chr3_65342807_66024509_MAGI1_NM_-|	47.1376	-4.32925	1.83031	-2.36532	0.0180147	0.313389	1.3886	0	0	0	0	13.2716	97.2018	97.2981	139.917	48.8033	65.4685	102.302	1.24569	18.3839	-3.25664	0.626793	-3.88343	MAGI1	-	-
chr7:87511349-87511407:mpeak_186006|chr7_87505543_87536502_DBF4_NM_+|	26.215	-3.55593	1.50929	-2.35603	0.0184715	0.313502	1.3886	1.05759	0	2.50273	6.33566	19.3544	38.8807	26.4397	64.934	57.5628	25.3426	70.7817	2.81701	18.3443	-3.52672	-0.238664	-3.28806	DBF4	-	-
chr6:12053522-12053607:mpeak_169742|chr6_12012723_12163515_HIVEP1_NM_+|	27.8727	-3.4099	1.69673	-2.00969	0.0444641	0.434136	1.3886	1.05759	0	0	3.16783	13.8246	27.7719	33.8428	114.408	33.7869	31.6783	73.5466	2.08455	18.3355	-2.79628	0.340551	-3.13683	HIVEP1	-	-
chr14:93267456-93267518:mpeak_65340|chr14_93260575_93305710_GOLGA5_NM_+|	63.5897	-5.3769	1.99783	-2.69137	0.00711586	0.269946	0	0	0	0	0	22.1193	104.145	101.528	170.065	108.869	74.9719	181.378	#DIV/0!	18.1693	-Inf	0.0409673	-Inf	GOLGA5	-	-
chr5:64915190-64915240:mpeak_160095|chr5_64887775_64920187_TRIM23_NM_-|	28.9676	-4.4503	1.82505	-2.43846	0.01475	0.295484	0	0	0	0	0	9.4007	41.6579	62.3977	78.8485	67.5738	39.0699	48.6624	#DIV/0!	18.159	-Inf	0.235973	-Inf	TRIM23	-	-
chr3:79427353-79427419:mpeak_137527|chr3_78648077_79817059_ROBO1_NM_-|	37.13	-3.27643	1.31055	-2.50003	0.0124182	0.290215	0	6.34553	0	3.7541	7.3916	2.76491	80.5386	93.0678	174.703	17.5191	16.8951	42.5796	5.46542	18.0672	-1.13237	2.17756	-3.30993	ROBO1	-	-
chr6:110475560-110475610:mpeak_176440|chr6_110421882_110501207_WASF1_NM_-|	27.0591	-4.28249	2.05361	-2.08535	0.0370374	0.401931	0	0	0	0	0	8.84772	20.8289	26.4397	121.365	40.0437	25.3426	81.8414	#DIV/0!	18.0286	-Inf	0.195841	-Inf	WASF1	-	-
chr17:57143824-57143877:mpeak_88293|chr17_57060282_57184266_TRIM37_NM_-|	64.1103	-5.52259	1.99144	-2.77316	0.00555154	0.267856	1.3886	0	0	0	1.05594	36.4968	74.9842	96.2405	245.822	97.6065	68.6363	147.093	0.998879	17.9772	-4.75722	0.412497	-5.16972	TRIM37	-	-
chr3:136315438-136315488:mpeak_141091|chr3_136057119_136471245_STAG1_NM_-|	19.727	-3.99094	1.85224	-2.15466	0.0311888	0.376058	1.3886	0	0	1.25137	0	9.4007	29.1605	28.5549	78.0754	32.5355	12.6713	43.6856	3.0678	17.9746	-2.93943	0.611254	-3.55069	STAG1	-	-
chr6:12034593-12034643:mpeak_169736|chr6_12012723_12163515_HIVEP1_NM_+|	26.9441	-4.35674	1.96169	-2.22091	0.0263573	0.354861	0	0	0	0	0	8.29473	27.7719	33.8428	114.408	33.7869	31.6783	73.5466	#DIV/0!	17.9008	-Inf	0.340551	-Inf	HIVEP1	-	-
chr4:107218716-107218866:mpeak_152873|chr4_106967837_107237861_TBCK_NM_-|	25.4929	-4.72358	1.4992	-3.15073	0.00162864	0.267856	0	1.05759	0	3.7541	7.3916	11.0596	29.1605	49.7067	79.6215	38.7923	42.2377	43.1326	2.00189	17.8841	-4.39206	0.352148	-4.7442	TBCK	-	-
chr5:5487737-5487789:mpeak_157300|chr5_5422785_5489261_ICE1_NM_+|	28.1427	-3.911	1.86463	-2.09746	0.0359525	0.395841	0	0	0	0	0	11.6126	37.4921	34.9004	58.7498	60.0656	59.1328	75.7586	#DIV/0!	17.8695	-Inf	-0.572022	-Inf	ICE1	-	-
chr15:57557883-57557933:mpeak_69630|chr15_57210832_57578354_TCF12_NM_+|	31.4491	-4.34695	2.0295	-2.14189	0.0322026	0.380814	0	0	0	0	0	11.0596	33.3263	32.7852	114.408	57.5628	24.2867	103.961	#DIV/0!	17.8564	-Inf	-0.041678	-Inf	TCF12	-	-
chr1:16647821-16647884:mpeak_1384|chr1_16578280_16678986_FBXO42_NM_-|	32.6832	-4.29748	1.95211	-2.20146	0.0277038	0.362115	0	0	0	0	0	12.1656	49.9895	42.3035	82.7136	43.7978	40.1258	121.103	#DIV/0!	17.801	-Inf	-0.228403	-Inf	FBXO42	-	-
chr19:45898418-45898468:mpeak_100590|chr19_45883486_45909607_PPP1R13L_NM_-|	28.8201	-3.69828	1.78372	-2.07335	0.0381398	0.407782	1.3886	1.05759	0	1.25137	1.05594	26.5431	18.0518	39.1308	95.082	36.2896	48.5734	77.4175	2.40981	17.7781	-3.55999	-0.0919102	-3.46808	PPP1R13L	-	-
chr20:45021382-45021436:mpeak_123526|chr20_44996199_45035271_ELMO2_NM_-|	38.624	-2.29938	0.905877	-2.53829	0.0111396	0.286959	4.16579	3.17277	2.31907	5.00546	9.50349	16.5895	72.207	86.7222	88.1247	65.071	46.4615	64.1459	3.90912	17.7019	-1.6871	0.491889	-2.17899	ELMO2	-	-
chr3:45437897-45437947:mpeak_134800|chr3_45430074_45588842_LARS2_NM_+|	37.5495	-4.22227	2.03237	-2.07751	0.0377542	0.406088	0	0	0	0	0	15.4835	51.3781	32.7852	87.3517	55.0601	45.4055	163.13	#DIV/0!	17.6219	-Inf	-0.61999	-Inf	LARS2	-	-
chr17:2210958-2211018:mpeak_82160|chr17_2207236_2226948_SRR_NM_+|	22.0245	-2.48175	1.16964	-2.12181	0.0338535	0.387244	4.16579	0	0.773024	3.7541	8.44754	6.63579	45.8237	35.958	51.7926	43.7978	21.1189	42.0267	5.54614	17.6144	-1.93137	0.320796	-2.25216	SRR	-	-
chr15:91563765-91563815:mpeak_73369|chr15_91542284_91565851_VPS33B_NM_-|	30.0062	-4.1771	1.93077	-2.16343	0.0305079	0.37332	0	0	0	0	0	11.0596	22.2175	51.8218	86.5787	65.071	46.4615	76.8645	#DIV/0!	17.6112	-Inf	-0.230142	-Inf	VPS33B	-	-
chr18:19138754-19138804:mpeak_93353|chr18_19110451_19180693_ESCO1_NM_-|	19.1375	-4.00061	1.52793	-2.61832	0.00883647	0.276704	1.3886	0	0	11.2623	2.11189	4.97684	29.1605	33.8428	42.5163	30.0328	29.5664	44.7916	3.94788	17.5792	-3.72416	0.0155182	-3.73968	ESCO1	-	-
chr7:6187146-6187196:mpeak_181528|chr7_6144549_6200185_USP42_NM_+|	25.0375	-4.082	2.04526	-1.99584	0.0459519	0.439708	0	0	0	0	0	8.29473	23.6061	22.2094	104.358	32.5355	24.2867	85.1593	#DIV/0!	17.5264	-Inf	0.0809299	-Inf	USP42	-	-
chr9:68453131-68453181:mpeak_203559|chr9_68427894_68454375_LOC642236_NR_-|	18.0145	-3.48631	1.73602	-2.00822	0.0446203	0.434562	1.3886	0	0	0	4.22377	7.74175	15.2746	31.7277	53.3387	18.7705	30.6223	53.0863	4.15164	17.5141	-3.10718	-0.0304207	-3.07676	LOC642236	-	-
chr16:84406893-84406943:mpeak_80975|chr16_84402128_84497219_ATP2C2_NM_+|	40.9417	-5.08473	1.88834	-2.6927	0.0070877	0.269946	0	0	0	0	0	10.5067	44.4351	90.9526	165.427	47.5519	52.7971	79.6294	#DIV/0!	17.5132	-Inf	0.741051	-Inf	ATP2C2	-	-
chr1:246414073-246414123:mpeak_20585|chr1_245912966_246670644_SMYD3_NM_-|	21.4395	-3.59382	1.8232	-1.97116	0.0487054	0.450866	0	0	0	0	0	8.29473	40.2693	37.0156	27.8289	62.5683	34.8461	46.4505	#DIV/0!	17.2969	-Inf	-0.452763	-Inf	SMYD3	-	-
chr18:19112118-19112168:mpeak_93342|chr18_19110451_19180693_ESCO1_NM_-|	18.4938	-4.53524	1.65495	-2.74041	0.00613624	0.268895	0	0	0	0	3.16783	8.84772	29.1605	33.8428	42.5163	30.0328	29.5664	44.7916	#DIV/0!	17.2652	-Inf	0.0155182	-Inf	ESCO1	-	-
chr5:6655635-6655685:mpeak_157336|chr5_6633499_6668314_SRD5A1_NM_+|	47.3132	-4.10621	2.01553	-2.03729	0.0416208	0.422279	0	1.05759	0	0	0	13.8246	47.2123	51.8218	213.355	51.306	45.4055	143.775	1.01565	17.2457	-3.70838	0.377384	-4.08577	SRD5A1	-	-
chr18:14218327-14218450:mpeak_93141|chr18_14179095_14225671_ANKRD20A5P_NR_+|	31.0816	-4.56733	1.8886	-2.41837	0.0155902	0.29993	0	0	0	0	0	8.84772	38.8807	64.5129	106.677	32.5355	84.4754	37.0498	#DIV/0!	17.229	-Inf	0.447377	-Inf	ANKRD20A5P	-	-
chr19:38549452-38549502:mpeak_99648|chr19_38397860_38696736_SIPA1L3_NM_+|	18.6389	-3.27053	1.47344	-2.21966	0.0264418	0.355112	1.3886	1.05759	0	6.25683	1.05594	8.29473	29.1605	28.5549	56.4308	42.5464	29.5664	19.3544	3.21454	17.0635	-2.67363	0.319556	-2.99319	SIPA1L3	-	-
chr1:178171731-178171793:mpeak_15469|chr1_178062863_178442209_RASAL2_NM_+|	14.8866	-4.46036	1.72436	-2.58668	0.00969066	0.279144	0	0	0	5.00546	5.27971	4.97684	4.16579	20.0942	49.4735	22.5246	30.6223	36.4968	#DIV/0!	17.0252	-Inf	-0.281883	-Inf	RASAL2	-	-
chr9:115966236-115966286:mpeak_207334|chr9_115928435_115983641_FKBP15_NM_-|	16.4369	-4.48198	1.62391	-2.76	0.00578019	0.267856	0	0	0	2.50273	3.16783	12.7186	15.2746	25.3821	30.1479	32.5355	28.5105	47.0035	#DIV/0!	17.0192	-Inf	-0.609777	-Inf	FKBP15	-	-
chr14:96780347-96780397:mpeak_65628|chr14_96752322_96829678_ATG2B_NM_-|	42.37	-4.66471	2.0549	-2.27004	0.023205	0.339145	0	0	0	0	0	14.3775	24.9947	53.937	161.562	61.3169	62.3006	129.951	#DIV/0!	17.0102	-Inf	-0.0763754	-Inf	ATG2B	-	-
chr2:17903338-17903454:mpeak_103629|chr2_17846880_17935096_SMC6_NM_-|	29.3025	-2.84978	1.38527	-2.0572	0.0396667	0.414039	0	4.23035	0	10.0109	11.6154	2.21193	49.9895	67.6857	64.934	85.0929	34.8461	21.0133	6.94985	16.9123	-2.49443	0.373552	-2.86798	SMC6	-	-
chr4:148943780-148943830:mpeak_155164|chr4_148653452_148993143_ARHGAP10_NM_+|	28.0699	-4.04232	1.86371	-2.16897	0.0300851	0.371409	0	0	0	0	0	9.95368	27.7719	58.1674	64.161	42.5464	61.2447	72.9937	#DIV/0!	16.8912	-Inf	-0.236067	-Inf	ARHGAP10	-	-
chr3:78677832-78677932:mpeak_137447|chr3_78648077_79817059_ROBO1_NM_-|	36.6124	-5.67312	1.5845	-3.58038	0.000343099	0.267856	0	1.05759	0	7.5082	1.05594	4.42386	80.5386	93.0678	174.703	17.5191	16.8951	42.5796	0.910903	16.8689	-3.61833	2.17756	-5.79588	ROBO1	-	-
chr6:28197990-28198040:mpeak_171158|chr6_28193028_28200339_ZSCAN9_NM_+|	21.4154	-4.72994	2.18756	-2.1622	0.0306031	0.373642	0	0	0	1.25137	0	11.6126	12.4974	11.6335	105.131	26.2787	9.50349	79.0765	#DIV/0!	16.7998	-Inf	0.17044	-Inf	ZSCAN9	-	-
chr3:138251349-138251410:mpeak_141273|chr3_138213918_138313225_CEP70_NM_-|	18.6931	-4.12983	1.68639	-2.44891	0.0143288	0.293828	0	0	0	0	3.16783	11.0596	20.8289	31.7277	30.1479	37.541	41.1818	48.6624	#DIV/0!	16.7533	-Inf	-0.623159	-Inf	CEP70	-	-
chrX:13718475-13718540:mpeak_210659|chrX_13707239_13726839_RAB9A_NM_+|	41.0928	-3.54978	1.45607	-2.43792	0.014772	0.295484	1.3886	2.11518	0.773024	3.7541	4.22377	21.5663	56.9325	26.4397	198.667	48.8033	31.6783	96.7719	1.51638	16.6678	-2.78827	0.670083	-3.45835	RAB9A	-	-
chr5:54705233-54705283:mpeak_159464|chr5_54603575_54720547_SKIV2L2_NM_+|	32.6879	-4.34581	2.02833	-2.14255	0.0321489	0.380814	0	0	0	0	0	10.5067	19.4404	48.6491	124.457	52.5574	33.7902	102.855	#DIV/0!	16.6594	-Inf	0.0252761	-Inf	SKIV2L2	-	-
chr19:13226671-13226721:mpeak_97438|chr19_13215895_13227563_TRMT1_NM_-|	30.7205	-4.52639	1.7962	-2.51998	0.0117362	0.288705	0	0	0	0	0	8.29473	83.3158	68.7432	57.2038	56.3115	65.4685	29.3081	#DIV/0!	16.47	-Inf	0.469927	-Inf	TRMT1	-	-
chr11:102957132-102957182:mpeak_38960|chr11_102933143_102962944_DCUN1D5_NM_-|	61.7866	-5.12847	1.98271	-2.58659	0.00969301	0.279144	0	0	0	0	0	20.4603	76.3728	88.8374	182.434	127.639	89.7551	155.941	#DIV/0!	16.4413	-Inf	-0.102862	-Inf	DCUN1D5	-	-
chrX:41731724-41731871:mpeak_211656|chrX_41379849_41782287_CASK_NM_-|	28.967	-5.08558	1.92846	-2.63713	0.00836113	0.273381	0	0	0	0	2.11189	15.4835	27.7719	27.4973	113.635	28.7814	43.2937	89.0301	#DIV/0!	16.3825	-Inf	0.0681982	-Inf	CASK	-	-
chr8:75184356-75184463:mpeak_195342|chr8_75149270_75233562_JPH1_NM_-|	22.7001	-3.87644	1.63346	-2.37315	0.0176371	0.310995	0	1.05759	0	0	7.3916	4.97684	38.8807	31.7277	74.9833	42.5464	22.1748	48.6624	2.17922	16.3627	-3.54781	0.360715	-3.90853	JPH1	-	-
chr17:78715213-78715263:mpeak_91778|chr17_78518624_78938061_RPTOR_NM_+|	18.9107	-3.67606	1.82646	-2.01266	0.0441501	0.433229	1.3886	0	0	0	2.11189	8.29473	52.7667	47.5915	19.3256	62.5683	17.951	14.9305	3.48066	16.3541	-2.9058	0.326412	-3.23221	RPTOR	-	-
chr16:23426894-23426944:mpeak_76717|chr16_23400407_23464512_COG7_NM_-|	47.448	-5.33718	1.77744	-3.00274	0.00267565	0.267856	0	0	0	0	0	9.95368	97.2018	115.277	163.881	66.3224	45.4055	71.3347	#DIV/0!	16.3119	-Inf	1.03978	-Inf	COG7	-	-
chr19:45591108-45591162:mpeak_100544|chr19_45582517_45593364_GEMIN7_NM_+|	23.587	-2.62621	1.33252	-1.97086	0.0487401	0.451094	1.3886	2.11518	0	6.25683	13.7273	1.65895	33.3263	35.958	55.6577	51.306	39.0699	42.5796	4.20648	16.2784	-2.62692	-0.0896846	-2.53724	GEMIN7	-	-
chr17:29501259-29501309:mpeak_85143|chr17_29421944_29701030_NF1_NM_+|	30.3052	-5.24647	1.86319	-2.81586	0.00486476	0.267856	0	0	0	0	2.11189	14.9305	55.5439	38.0732	95.855	25.0273	35.9021	96.2189	#DIV/0!	16.2672	-Inf	0.269858	-Inf	NF1	-	-
chr12:4637929-4637979:mpeak_41161|chr12_4599065_4647674_C12orf4_NM_-|	19.3705	-3.04989	1.43988	-2.11816	0.0341617	0.387987	0	2.11518	0	5.00546	3.16783	9.95368	33.3263	26.4397	40.9703	43.7978	19.007	48.6624	6.29915	16.2622	-3.09929	-0.146036	-2.95325	C12orf4	-	-
chr19:38474825-38474985:mpeak_99639|chr19_38397860_38696736_SIPA1L3_NM_+|	18.0479	-3.64264	1.76471	-2.06415	0.0390033	0.411839	0	1.05759	0	0	1.05594	8.84772	29.1605	28.5549	56.4308	42.5464	29.5664	19.3544	2.77956	16.2413	-3.22718	0.319556	-3.54674	SIPA1L3	-	-
chr15:76184636-76184686:mpeak_71726|chr15_76135626_76191767_UBE2Q2_NM_+|	32.0623	-4.20317	2.03508	-2.06536	0.0388894	0.411123	0	0	0	0	0	10.5067	29.1605	30.6701	119.819	38.7923	38.0139	117.785	#DIV/0!	16.198	-Inf	-0.115265	-Inf	UBE2Q2	-	-
chr3:65558383-65558433:mpeak_136741|chr3_65342807_66024509_MAGI1_NM_-|	46.8836	-5.11285	1.83143	-2.79172	0.00524282	0.267856	0	0	0	0	0	11.6126	97.2018	97.2981	139.917	48.8033	65.4685	102.302	#DIV/0!	16.0859	-Inf	0.626793	-Inf	MAGI1	-	-
chr1:85129530-85129580:mpeak_6772|chr1_85113290_85156240_SSX2IP_NM_-|	29.1219	-4.03437	1.73803	-2.32123	0.0202744	0.32212	0	1.05759	0	1.25137	4.22377	27.6491	30.5491	28.5549	50.2466	78.8361	36.958	90.1361	2.90146	16.0852	-4.96904	-0.913194	-4.05584	SSX2IP	-	-
chr2:39034377-39034427:mpeak_105699|chr2_39025584_39103021_DHX57_NM_-|	22.1736	-4.25416	1.81038	-2.34988	0.0187796	0.315087	0	0	0	0	2.11189	14.3775	30.5491	26.4397	38.6512	42.5464	29.5664	81.8414	#DIV/0!	16.0659	-Inf	-0.686815	-Inf	DHX57	-	-
chr12:64847255-64847305:mpeak_46988|chr12_64845839_64895109_TBK1_NM_+|	44.2006	-3.97599	1.93917	-2.05035	0.0403301	0.417238	1.3886	0	0	0	0	11.6126	49.9895	51.8218	198.667	58.8142	47.5174	110.596	1.38639	16.0596	-3.064	0.470045	-3.53404	TBK1	-	-
chr17:6526850-6526996:mpeak_82764|chr17_6483184_6544247_KIAA0753_NM_-|	35.1902	-2.50431	1.26661	-1.97717	0.0480219	0.448825	2.77719	4.23035	0	1.25137	5.27971	20.4603	62.4868	67.6857	89.6708	53.8087	54.909	59.7221	4.78128	16.0244	-1.94552	0.384242	-2.32976	KIAA0753	-	-
chr9:93565580-93565694:mpeak_205071|chr9_93563961_93657809_SYK_NM_+|	47.7172	-4.79367	1.94588	-2.4635	0.0137587	0.293236	0	0	0	0	0	14.9305	76.3728	70.8584	130.641	62.5683	60.1887	157.047	#DIV/0!	16.0082	-Inf	-0.00999461	-Inf	SYK	-	-
chr6:144807391-144807509:mpeak_178707|chr6_144612872_145172124_UTRN_NM_+|	21.2433	-4.96678	1.67096	-2.97242	0.00295462	0.267856	0	0	0	1.25137	6.33566	12.7186	23.6061	27.4973	56.4308	26.2787	31.6783	69.1228	#DIV/0!	15.9786	-Inf	-0.240939	-Inf	UTRN	-	-
chr1:114394386-114394469:mpeak_9627|chr1_114355233_114442493_AP4B1-AS1_NR_+|	33.9584	-3.49438	1.70748	-2.04652	0.0407057	0.418462	0	2.11518	0	0	1.05594	17.6954	81.9272	66.6281	59.5229	51.306	57.0209	70.2287	3.04959	15.7525	-3.14815	0.220751	-3.3689	AP4B1-AS1	-	-
chr16:78976500-78976549:mpeak_80621|chr16_78133309_79245504_WWOX_NM_+|	19.8974	-3.32914	1.64765	-2.02054	0.0433276	0.430535	0	1.05759	0	0	4.22377	8.84772	22.2175	40.1884	37.1052	25.0273	46.4615	53.6393	3.18835	15.6697	-3.62757	-0.330477	-3.2971	WWOX	-	-
chr3:126553157-126553209:mpeak_140080|chr3_126423062_126679038_CHCHD6_NM_+|	29.9002	-3.36351	1.53265	-2.19457	0.0281945	0.36399	1.3886	1.05759	0	0	3.16783	12.1656	62.4868	64.5129	66.4801	48.8033	28.5105	70.2287	1.89647	15.5888	-2.64808	0.391053	-3.03913	CHCHD6	-	-
chr12:123078575-123078723:mpeak_52388|chr12_123011808_123110751_KNTC1_NM_+|	25.2458	-3.86945	1.74968	-2.21152	0.0270001	0.358109	0	1.05759	0	8.75956	9.50349	8.29473	9.72018	11.6335	83.4866	31.2841	38.0139	101.196	3.02629	15.577	-4.65028	-0.701527	-3.94876	KNTC1	-	-
chr1:178405123-178405173:mpeak_15489|chr1_178062863_178442209_RASAL2_NM_+|	14.3898	-3.86045	1.93278	-1.99736	0.0457864	0.438972	0	0	0	0	2.11189	7.18877	4.16579	20.0942	49.4735	22.5246	30.6223	36.4968	#DIV/0!	15.5627	-Inf	-0.281883	-Inf	RASAL2	-	-
chr14:55864374-55864424:mpeak_61597|chr14_55836643_55878576_ATG14_NM_-|	29.361	-4.19368	2.00292	-2.09378	0.0362796	0.397498	0	0	0	0	0	8.29473	26.3833	45.4763	111.315	26.2787	30.6223	103.961	#DIV/0!	15.4693	-Inf	0.187403	-Inf	ATG14	-	-
chr20:25661322-25661374:mpeak_121954|chr20_25657673_25677540_ZNF337_NM_-|	41.0362	-3.05323	1.26457	-2.41444	0.0157594	0.300524	1.3886	0	2.31907	0	11.6154	4.97684	79.15	86.7222	145.329	57.5628	59.1328	44.2386	1.78711	15.4649	-2.16192	0.951375	-3.1133	ZNF337	-	-
chrX:13783077-13783150:mpeak_210688|chrX_13752831_13787184_OFD1_NM_+|	17.6291	-3.22592	1.57912	-2.04286	0.0410659	0.420145	0	1.05759	0	0	4.22377	6.63579	29.1605	35.958	28.6019	27.5301	38.0139	40.3677	3.38535	15.3801	-3.36012	-0.176427	-3.18369	OFD1	-	-
chr10:101728949-101728999:mpeak_28581|chr10_101637093_101769676_DNMBP_NM_-|	30.2878	-4.09568	1.8494	-2.2146	0.0267876	0.357096	0	0	0	0	0	9.4007	69.4298	45.4763	55.6577	60.0656	32.7342	90.6891	#DIV/0!	15.3699	-Inf	-0.105381	-Inf	DNMBP	-	-
chr1:180658647-180658699:mpeak_15896|chr1_180601145_180853141_XPR1_NM_+|	41.1196	-4.7939	1.82933	-2.62058	0.00877799	0.275453	0	0	0	0	0	10.5067	74.9842	63.4553	139.144	87.5956	59.1328	58.6161	#DIV/0!	15.3498	-Inf	0.434877	-Inf	XPR1	-	-
chr2:214014538-214014590:mpeak_118067|chr2_213872808_214016333_IKZF2_NM_-|	32.2336	-4.09265	1.47113	-2.78197	0.00540298	0.267856	1.3886	1.05759	0	5.00546	9.50349	4.97684	36.1035	51.8218	149.967	26.2787	33.7902	66.9109	1.54241	15.3456	-2.99382	0.905709	-3.89953	IKZF2	-	-
chr18:20537734-20537784:mpeak_93484|chr18_20513294_20606105_RBBP8_NM_+|	35.7984	-3.53194	1.78896	-1.9743	0.0483478	0.450068	0	1.05759	0	0	0	9.95368	81.9272	47.5915	94.3089	62.5683	46.4615	85.7122	1.4175	15.3336	-3.23445	0.200824	-3.43528	RBBP8	-	-
chr2:48044751-48044801:mpeak_106632|chr2_48035386_48132932_FBXO11_NM_-|	30.8769	-4.12042	1.93873	-2.12532	0.0335598	0.386384	0	0	0	0	0	9.4007	33.3263	31.7277	111.315	47.5519	45.4055	91.7951	#DIV/0!	15.2648	-Inf	-0.0669934	-Inf	FBXO11	-	-
chr11:108737543-108737593:mpeak_39250|chr11_108535751_108810972_DDX10_NM_+|	29.8735	-4.12144	1.91924	-2.14743	0.0317587	0.378044	0	0	0	0	0	8.84772	45.8237	27.4973	102.039	75.082	30.6223	68.5698	#DIV/0!	15.2307	-Inf	0.00896279	-Inf	DDX10	-	-
chr2:231656701-231656753:mpeak_119264|chr2_231577556_231683230_CAB39_NM_+|	24.9403	-5.72978	1.71363	-3.34365	0.000826834	0.267856	0	0	0	1.25137	4.22377	8.84772	33.3263	45.4763	112.088	21.2732	15.8391	56.9572	#DIV/0!	15.2258	-Inf	1.02095	-Inf	CAB39	-	-
chr12:39733382-39733445:mpeak_43759|chr12_39688319_39837192_KIF21A_NM_-|	32.5193	-5.61517	1.8858	-2.9776	0.00290517	0.267856	0	0	0	1.25137	0	11.0596	44.4351	44.4187	167.746	43.7978	21.1189	56.4042	#DIV/0!	15.2212	-Inf	1.08069	-Inf	KIF21A	-	-
chr11:62503176-62503228:mpeak_35162|chr11_62495951_62505759_TTC9C_NM_+|	41.2979	-4.36113	2.08855	-2.08811	0.0367877	0.400597	0	0	0	0	0	13.2716	34.7149	44.4187	139.917	41.2951	42.2377	179.719	#DIV/0!	15.1242	-Inf	-0.265178	-Inf	TTC9C	-	-
chr10:17642328-17642386:mpeak_22226|chr10_17632445_17659373_HACD1_NM_-|	25.7389	-3.17829	1.48843	-2.13533	0.0327344	0.383314	0	1.05759	0.773024	0	4.22377	8.84772	47.2123	43.3611	73.4373	58.8142	27.4545	43.6856	1.67423	15.0878	-2.83603	0.335785	-3.17181	HACD1	-	-
chr12:101686370-101686420:mpeak_49856|chr12_101673904_101779745_UTP20_NM_+|	15.0103	-3.34968	1.66991	-2.0059	0.0448668	0.435124	0	1.05759	0	5.00546	3.16783	5.52982	13.886	12.6911	47.9275	31.2841	14.7832	44.7916	4.25849	15.0818	-3.69565	-0.2863	-3.40935	UTP20	-	-
chr8:9577661-9577711:mpeak_191784|chr8_9413444_9634159_TNKS_NM_+|	25.7759	-3.26658	1.49646	-2.18286	0.0290458	0.365974	2.77719	0	0	2.50273	6.33566	13.8246	26.3833	29.6125	77.3024	35.0382	47.5174	68.0168	6.25033	15.0512	-3.02864	-0.175801	-2.85284	TNKS	-	-
chr17:65463814-65463864:mpeak_90477|chr17_65373396_65688687_PITPNC1_NM_+|	36.6555	-4.66235	2.20328	-2.11609	0.0343372	0.388709	0	0	0	0	0	8.29473	15.2746	24.3245	226.496	28.7814	32.7342	103.961	#DIV/0!	15.0379	-Inf	0.685317	-Inf	PITPNC1	-	-
chr6:35031461-35031566:mpeak_172132|chr6_34857037_35056382_ANKS1A_NM_+|	27.0101	-3.89394	1.7628	-2.20895	0.027178	0.359661	0	1.05759	0	0	3.16783	12.1656	33.3263	31.7277	89.6708	30.0328	42.2377	80.7354	2.05059	15.0322	-3.85783	0.0161167	-3.87395	ANKS1A	-	-
chr22:30281721-30281771:mpeak_129498|chr22_30279157_30421618_MTMR3_NM_+|	56.3014	-4.16033	1.86786	-2.22733	0.0259252	0.352964	1.3886	0	0	0	0	14.3775	87.4816	92.0102	190.937	82.5902	69.6922	137.14	1.12459	14.903	-3.37212	0.356021	-3.72814	MTMR3	-	-
chr13:42204743-42204793:mpeak_55486|chr13_42142441_42535221_VWA8_NM_-|	18.3302	-3.55035	1.73026	-2.05191	0.0401782	0.416648	1.3886	0	0	1.25137	0	7.74175	30.5491	30.6701	57.2038	21.2732	30.6223	39.2617	3.51772	14.7982	-2.69519	0.377519	-3.07271	VWA8	-	-
chr1:211511308-211511358:mpeak_18290|chr1_211499956_211545469_TRAF5_NM_+|	35.8836	-4.49176	1.78427	-2.51742	0.0118216	0.289227	0	0	0	0	0	9.4007	80.5386	57.1098	92.7629	47.5519	69.6922	73.5466	#DIV/0!	14.7817	-Inf	0.27222	-Inf	TRAF5	-	-
chr6:20657037-20657088:mpeak_170456|chr6_20534687_21231078_CDKAL1_NM_+|	12.6896	-4.1229	1.62257	-2.54097	0.0110545	0.286729	0	0	0	2.50273	3.16783	5.52982	15.2746	30.6701	19.3256	25.0273	13.7273	37.0498	#DIV/0!	14.7754	-Inf	-0.215856	-Inf	CDKAL1	-	-
chr4:25250044-25250102:mpeak_147880|chr4_25235652_25278635_PI4K2B_NM_+|	21.3799	-4.28244	1.77169	-2.41715	0.0156427	0.300222	0	1.05759	0	1.25137	7.3916	5.52982	19.4404	15.8638	109.769	27.5301	20.0629	48.6624	2.187	14.7241	-3.74427	0.591845	-4.33612	PI4K2B	-	-
chr15:49097329-49097437:mpeak_68392|chr15_49031485_49103343_CEP152_NM_-|	31.3697	-3.39515	1.52064	-2.23271	0.0255678	0.35117	1.3886	1.05759	0	12.5137	13.7273	1.65895	43.0465	30.6701	82.7136	98.8579	55.965	34.8379	2.34563	14.7104	-3.51165	-0.277903	-3.23375	CEP152	-	-
chr6:41826557-41826619:mpeak_172782|chr6_41764461_41863099_USP49_NM_-|	15.7613	-3.36091	1.60808	-2.09001	0.0366165	0.399758	1.3886	0	0	3.7541	5.27971	4.97684	27.7719	12.6911	37.8782	17.5191	25.3426	52.5333	5.3175	14.687	-3.33482	-0.284144	-3.05068	USP49	-	-
chr6:143208081-143208131:mpeak_178471|chr6_143075068_143266338_HIVEP2_NM_-|	39.8771	-4.15329	1.92587	-2.15658	0.0310388	0.375357	0	0	0	0	0	13.2716	44.4351	58.1674	90.4438	75.082	52.7971	144.328	#DIV/0!	14.6266	-Inf	-0.49576	-Inf	HIVEP2	-	-
chr9:88225782-88225832:mpeak_204745|chr9_88162201_88356944_AGTPBP1_NM_-|	15.8866	-4.14222	1.75524	-2.35991	0.0182793	0.313389	0	0	0	0	1.05594	7.74175	22.2175	39.1308	30.1479	35.0382	34.8461	20.4603	#DIV/0!	14.6069	-Inf	0.0182726	-Inf	AGTPBP1	-	-
chr2:25738462-25738520:mpeak_104278|chr2_25600422_25896516_DTNB_NM_-|	21.7283	-5.46804	1.55953	-3.50622	0.000454514	0.267856	0	0	0	3.7541	1.05594	7.74175	48.6009	57.1098	56.4308	40.0437	21.1189	24.8842	#DIV/0!	14.5872	-Inf	0.91406	-Inf	DTNB	-	-
chr16:11257493-11257543:mpeak_75382|chr16_11038344_11272191_CLEC16A_NM_+|	41.1157	-4.50951	1.83096	-2.46292	0.013781	0.293236	0	0	0	0	0	11.6126	74.9842	53.937	113.635	78.8361	81.3076	79.0765	#DIV/0!	14.5631	-Inf	0.0199777	-Inf	CLEC16A	-	-
chr14:50659488-50659538:mpeak_60871|chr14_50585571_50698099_SOS2_NM_-|	31.4457	-4.01516	2.03172	-1.97623	0.0481283	0.44916	0	0	0	0	0	9.4007	26.3833	34.9004	112.862	35.0382	33.7902	124.974	#DIV/0!	14.552	-Inf	-0.154295	-Inf	SOS2	-	-
chr5:14492421-14492518:mpeak_157834|chr5_14143828_14507988_TRIO_NM_+|	53.7185	-4.75351	1.8924	-2.51189	0.0120086	0.289771	0	0	0	0	0	16.0365	91.6474	95.183	110.542	102.612	77.0838	151.517	#DIV/0!	14.5252	-Inf	-0.155487	-Inf	TRIO	-	-
chr2:225649858-225650070:mpeak_118886|chr2_225630554_225907330_DOCK10_NM_-|	22.1444	-3.66134	1.64092	-2.23127	0.0256634	0.351785	0	1.05759	0	2.50273	10.5594	8.29473	27.7719	12.6911	55.6577	25.0273	47.5174	74.6526	3.30081	14.509	-4.33585	-0.614832	-3.72102	DOCK10	-	-
chr2:42932339-42932389:mpeak_105955|chr2_42721708_42980513_MTA3_NM_+|	13.0786	-4.01138	1.70806	-2.3485	0.0188492	0.315087	0	0	0	1.25137	2.11189	8.84772	31.9377	12.6911	15.4605	27.5301	20.0629	37.0498	#DIV/0!	14.4265	-Inf	-0.49428	-Inf	MTA3	-	-
chr6:109388276-109388326:mpeak_176314|chr6_109308833_109415708_SESN1_NM_-|	30.3178	-3.90834	1.8256	-2.14085	0.032286	0.380864	0	0	0	0	0	9.4007	54.1553	41.2459	63.388	67.5738	40.1258	87.9242	#DIV/0!	14.4165	-Inf	-0.300969	-Inf	SESN1	-	-
chr16:78655968-78656018:mpeak_80563|chr16_78133309_79245504_WWOX_NM_+|	19.7212	-4.18239	1.68707	-2.47908	0.0131721	0.292072	0	0	0	0	3.16783	8.84772	22.2175	40.1884	37.1052	25.0273	46.4615	53.6393	#DIV/0!	14.4039	-Inf	-0.330477	-Inf	WWOX	-	-
chr2:3408555-3408609:mpeak_102890|chr2_3383445_3482989_TRAPPC12_NM_+|	39.4545	-4.60012	1.77432	-2.59262	0.00952483	0.278558	0	0	0	0	0	9.95368	66.6526	82.4919	106.677	71.3279	63.3566	72.9937	#DIV/0!	14.3785	-Inf	0.30079	-Inf	TRAPPC12	-	-
chr3:11556193-11556243:mpeak_132220|chr3_11314009_11596284_ATG7_NM_+|	40.9971	-3.61626	1.79741	-2.01192	0.0442282	0.433229	0	1.05759	0	0	0	10.5067	94.4246	93.0678	70.3452	116.377	58.0769	48.1095	1.23053	14.1623	-3.31245	0.212246	-3.5247	ATG7	-	-
chr9:80143980-80144043:mpeak_204101|chr9_80039085_80263232_GNA14_NM_-|	58.3956	-2.34688	0.943776	-2.48669	0.0128937	0.291257	6.94298	5.28794	0.773024	5.00546	11.6154	16.5895	113.865	118.45	187.072	67.5738	81.3076	86.2652	3.10071	14.1232	-1.35268	0.83472	-2.1874	GNA14	-	-
chr10:29819900-29819950:mpeak_23441|chr10_29747262_30024730_SVIL_NM_-|	23.7648	-3.77237	1.83044	-2.06091	0.0393116	0.412293	1.3886	0	0	0	2.11189	9.4007	24.9947	39.1308	85.8057	27.5301	17.951	76.8645	2.77847	14.1148	-3.05151	0.293338	-3.34485	SVIL	-	-
chr18:55768982-55769032:mpeak_95164|chr18_55711609_56063398_NEDD4L_NM_+|	46.6655	-4.91515	1.77888	-2.76306	0.00572618	0.267856	0	0	0	0	0	10.5067	102.756	105.759	117.5	83.8415	87.6433	51.9803	#DIV/0!	14.1051	-Inf	0.544887	-Inf	NEDD4L	-	-
chrX:112039068-112039118:mpeak_214006|chrX_112021892_112084043_AMOT_NM_-|	19.1235	-4.19856	1.7171	-2.44515	0.0144792	0.293974	0	0	0	2.50273	0	8.29473	37.4921	17.979	47.9275	33.7869	42.2377	39.2617	#DIV/0!	14.0487	-Inf	-0.157005	-Inf	AMOT	-	-
chr4:113321460-113321510:mpeak_153201|chr4_113218498_113362358_ALPK1_NM_+|	14.7726	-4.28968	1.59974	-2.68148	0.00732972	0.271259	0	0	0	5.00546	2.11189	4.97684	13.886	23.2669	41.7433	21.2732	28.5105	36.4968	#DIV/0!	14.0173	-Inf	-0.129079	-Inf	ALPK1	-	-
chr19:53192241-53192291:mpeak_101778|chr19_53118050_53193834_ZNF83_NM_-|	31.0317	-3.90702	1.79167	-2.18066	0.0292084	0.366779	0	0	0	0	0	9.4007	44.4351	53.937	63.388	66.3224	82.3635	52.5333	#DIV/0!	14.0156	-Inf	-0.314913	-Inf	ZNF83	-	-
chr11:72010519-72010639:mpeak_36790|chr11_72004659_72145728_CLPB_NM_-|	17.7379	-3.22347	1.44615	-2.229	0.0258136	0.352652	1.3886	0	0	5.00546	5.27971	6.63579	24.9947	25.3821	23.1907	42.5464	36.958	41.4737	5.66253	13.9868	-3.60711	-0.717604	-2.88951	CLPB	-	-
chr4:25256443-25256493:mpeak_147885|chr4_25235652_25278635_PI4K2B_NM_+|	21.2326	-5.21448	1.81162	-2.87835	0.00399762	0.267856	0	0	0	2.50273	2.11189	8.84772	19.4404	15.8638	109.769	27.5301	20.0629	48.6624	#DIV/0!	13.9861	-Inf	0.591845	-Inf	PI4K2B	-	-
chr16:19004347-19004397:mpeak_76152|chr16_18995255_19073099_TMC7_NM_+|	21.8784	-4.14299	1.85867	-2.22901	0.0258135	0.352652	0	0	0	0	2.11189	11.6126	23.6061	19.0366	58.7498	30.0328	31.6783	85.7122	#DIV/0!	13.9644	-Inf	-0.540013	-Inf	TMC7	-	-
chr2:120013863-120013913:mpeak_111311|chr2_119981383_120020632_STEAP3_NM_+|	41.946	-4.71509	1.94562	-2.42344	0.0153744	0.299241	0	0	0	0	0	9.4007	37.4921	75.0888	179.342	51.306	40.1258	110.596	#DIV/0!	13.9595	-Inf	0.531028	-Inf	STEAP3	-	-
chr14:71236115-71236165:mpeak_63475|chr14_71197581_71275888_MAP3K9_NM_-|	43.6819	-4.83408	1.82468	-2.64927	0.00806664	0.273277	0	0	0	0	0	9.4007	115.254	75.0888	122.138	57.5628	38.0139	106.726	#DIV/0!	13.9406	-Inf	0.627251	-Inf	MAP3K9	-	-
chr11:77116816-77116866:mpeak_37470|chr11_77034405_77185108_PAK1_NM_-|	40.2694	-4.79462	1.73862	-2.75772	0.00582057	0.267856	0	0	0	0	0	8.29473	77.7614	95.183	122.911	46.3005	68.6363	64.1459	#DIV/0!	13.8954	-Inf	0.724265	-Inf	PAK1	-	-
chr20:35684016-35684066:mpeak_122734|chr20_35627332_35724403_RBL1_NM_-|	37.9086	-3.98111	1.85496	-2.1462	0.0318571	0.37871	0	0	0	0	0	12.1656	70.8184	41.2459	66.4801	116.377	78.1398	69.6758	#DIV/0!	13.8145	-Inf	-0.565307	-Inf	RBL1	-	-
chr13:76391765-76391815:mpeak_57178|chr13_76194569_76432056_LMO7_NM_+|	18.0703	-3.43596	1.51833	-2.26298	0.0236366	0.341062	0	1.05759	0	5.00546	2.11189	8.84772	33.3263	25.3821	25.5098	30.0328	38.0139	47.5565	3.76731	13.8102	-3.91607	-0.456977	-3.45909	LMO7	-	-
chr18:29704917-29705064:mpeak_93906|chr18_29671817_29709081_RNF138_NM_+|	32.541	-4.49486	1.7086	-2.63072	0.00852031	0.273381	0	1.05759	0	5.00546	4.22377	16.5895	19.4404	29.6125	127.549	47.5519	44.3496	95.1129	1.79656	13.8057	-4.60957	-0.0826498	-4.52692	RNF138	-	-
chr1:33800994-33801044:mpeak_3240|chr1_33790620_33841194_PHC2_NM_-|	40.3012	-4.51255	1.93277	-2.33476	0.0195561	0.317447	0	0	0	0	0	9.95368	43.0465	66.6281	147.648	55.0601	39.0699	122.209	#DIV/0!	13.8029	-Inf	0.250281	-Inf	PHC2	-	-
chr7:111042423-111042473:mpeak_188096|chr7_110303777_111202573_IMMP2L_NM_-|	18.5234	-4.16201	1.82895	-2.27563	0.0228684	0.337434	0	0	0	1.25137	0	8.84772	29.1605	24.3245	48.7005	23.776	24.2867	61.934	#DIV/0!	13.7719	-Inf	-0.106268	-Inf	IMMP2L	-	-
chr11:32922700-32922750:mpeak_33390|chr11_32914723_32997879_QSER1_NM_+|	38.1932	-4.46333	1.78278	-2.50358	0.0122944	0.29001	0	0	0	0	0	9.4007	63.8754	71.916	107.45	68.8251	52.7971	84.0533	#DIV/0!	13.7119	-Inf	0.242021	-Inf	QSER1	-	-
chr3:123670554-123670717:mpeak_139796|chr3_123634565_123680255_CCDC14_NM_-|	54.4898	-1.75506	0.893079	-1.96518	0.049394	0.453848	1.3886	6.34553	4.63814	6.25683	13.7273	20.4603	88.8702	74.0312	143.009	96.3552	99.2586	99.5368	4.0444	13.703	-1.70883	0.0516597	-1.76049	CCDC14	-	-
chr8:66744588-66744638:mpeak_194772|chr8_66631730_66753969_PDE7A_NM_-|	31.1976	-3.93457	1.80335	-2.18182	0.0291231	0.366464	0	0	0	0	0	8.84772	51.3781	47.5915	71.1182	42.5464	64.4125	88.4772	#DIV/0!	13.5815	-Inf	-0.200418	-Inf	PDE7A	-	-
chr13:93920636-93920686:mpeak_57434|chr13_93879077_95055268_GPC6_NM_+|	46.7656	-4.98549	2.09949	-2.37462	0.0175671	0.31089	0	0	0	0	0	8.29473	33.3263	58.1674	276.743	33.7869	25.3426	125.527	#DIV/0!	13.4759	-Inf	0.995788	-Inf	GPC6	-	-
chr15:101756024-101756074:mpeak_73945|chr15_101719185_101792137_CHSY1_NM_-|	33.0654	-4.98182	1.62371	-3.06818	0.00215368	0.267856	0	1.05759	0	2.50273	4.22377	10.5067	52.7667	47.5915	149.967	41.2951	22.1748	64.6989	1.26746	13.4457	-4.02634	0.965756	-4.99209	CHSY1	-	-
chr2:65645301-65645395:mpeak_107820|chr2_65541303_65659656_SPRED2_NM_-|	40.4145	-3.7635	1.47211	-2.55654	0.0105719	0.284119	2.77719	0	0	10.0109	10.5594	10.5067	43.0465	30.6701	146.102	48.8033	58.0769	124.421	3.79022	13.4357	-3.48415	-0.0734622	-3.41069	SPRED2	-	-
chr6:151278353-151278403:mpeak_179229|chr6_151186814_151422661_MTHFD1L_NM_+|	38.9262	-4.34361	1.91799	-2.26466	0.0235332	0.340816	0	0	0	0	0	9.95368	48.6009	57.1098	129.095	58.8142	38.0139	125.527	#DIV/0!	13.4294	-Inf	0.0786016	-Inf	MTHFD1L	-	-
chr14:45582023-45582158:mpeak_60555|chr14_45553301_45584059_PRPF39_NM_+|	33.8143	-3.97573	1.62173	-2.45153	0.014225	0.293828	0	2.11518	0	1.25137	5.27971	13.8246	34.7149	45.4763	151.513	41.2951	29.5664	80.7354	2.73864	13.4275	-3.26658	0.612042	-3.87862	PRPF39	-	-
chr21:34958747-34958807:mpeak_126758|chr21_34950750_34961014_DONSON_NM_-|	54.4969	-4.62251	1.87474	-2.46568	0.0136754	0.293236	0	0	0	0	0	15.4835	93.036	77.204	122.138	136.399	90.8111	118.891	#DIV/0!	13.4211	-Inf	-0.24336	-Inf	DONSON	-	-
chrX:84261868-84261918:mpeak_213412|chrX_84258897_84342595_APOOL_NM_+|	55.9767	-4.93846	1.88773	-2.61608	0.00889445	0.277157	0	0	0	0	0	13.2716	77.7614	85.6647	197.894	102.612	72.8601	121.656	#DIV/0!	13.3998	-Inf	0.282193	-Inf	APOOL	-	-
chr15:57216076-57216126:mpeak_69562|chr15_57210832_57578354_TCF12_NM_+|	31.2187	-3.97154	1.97886	-2.00698	0.0447514	0.434562	0	0	0	0	0	8.29473	33.3263	32.7852	114.408	57.5628	24.2867	103.961	#DIV/0!	13.3923	-Inf	-0.041678	-Inf	TCF12	-	-
chr7:135103421-135103471:mpeak_189574|chr7_135047938_135194875_CNOT4_NM_-|	40.5894	-3.58801	1.76754	-2.02994	0.0423623	0.425829	0	2.11518	0	2.50273	0	15.4835	43.0465	59.225	163.108	47.5519	40.1258	113.914	2.39112	13.3831	-3.08804	0.396618	-3.48466	CNOT4	-	-
chr17:27994736-27994786:mpeak_84926|chr17_27959949_28257246_SSH2_NM_-|	29.8663	-3.71193	1.89102	-1.96293	0.0496548	0.454932	0	0	0	0	0	8.84772	27.7719	39.1308	83.4866	52.5574	45.4055	101.196	#DIV/0!	13.3276	-Inf	-0.405216	-Inf	SSH2	-	-
chr15:59214154-59214204:mpeak_69761|chr15_59172306_59225852_SLTM_NM_-|	58.6778	-5.01681	2.0636	-2.4311	0.0150531	0.297665	0	0	0	0	0	13.2716	40.2693	69.8008	281.381	85.0929	51.7412	162.577	#DIV/0!	13.2977	-Inf	0.386705	-Inf	SLTM	-	-
chr3:11362608-11362662:mpeak_132189|chr3_11314009_11596284_ATG7_NM_+|	42.9671	-2.74145	1.10032	-2.49149	0.0127208	0.291257	1.3886	4.23035	0	6.25683	9.50349	13.8246	94.4246	93.0678	70.3452	116.377	58.0769	48.1095	3.26889	13.2928	-2.39649	0.212246	-2.60873	ATG7	-	-
chr16:47496332-47496382:mpeak_78084|chr16_47495209_47733139_PHKB_NM_+|	61.0153	-3.88594	1.64548	-2.36159	0.0181968	0.313389	1.3886	0	0.773024	0	3.16783	29.3081	97.2018	113.162	118.273	106.366	119.322	143.222	0.986632	13.2048	-3.90918	-0.166777	-3.74241	PHKB	-	-
chr22:30371016-30371066:mpeak_129516|chr22_30279157_30421618_MTMR3_NM_+|	56.0474	-4.95649	1.87402	-2.64485	0.00817281	0.273277	0	0	0	0	0	12.7186	87.4816	92.0102	190.937	82.5902	69.6922	137.14	#DIV/0!	13.1834	-Inf	0.356021	-Inf	MTMR3	-	-
chr5:111647332-111647391:mpeak_163668|chr5_111500815_111755010_EPB41L4A_NM_-|	29.9258	-3.63942	1.64595	-2.21114	0.0270263	0.358243	0	1.05759	0	0	3.16783	13.8246	48.6009	54.9946	43.2893	55.0601	63.3566	75.7586	2.16004	13.1266	-4.00604	-0.402674	-3.60336	EPB41L4A	-	-
chr9:126623766-126623816:mpeak_208287|chr9_126144904_126692417_DENND1A_NM_-|	27.0844	-4.02797	1.51546	-2.65792	0.0078625	0.273136	0	1.05759	0	0	4.22377	6.63579	61.0982	58.1674	69.5722	40.0437	43.2937	40.9207	1.68015	13.1093	-3.36012	0.603808	-3.96392	DENND1A	-	-
chr20:253469-253561:mpeak_120219|chr20_251908_271419_C20orf96_NM_-|	31.9134	-3.61937	1.3865	-2.61044	0.00904263	0.277333	1.3886	1.05759	0	3.7541	13.7273	3.31789	63.8754	84.6071	52.5656	58.8142	63.3566	36.4968	1.82507	13.1087	-3.08793	0.341533	-3.42946	C20orf96	-	-
chr13:21473822-21473872:mpeak_53536|chr13_21358058_21476913_XPO4_NM_-|	33.3816	-4.03967	1.78226	-2.26659	0.0234152	0.340432	0	0	0	0	0	8.84772	51.3781	57.1098	80.3945	71.3279	48.5734	82.9473	#DIV/0!	13.0852	-Inf	-0.102915	-Inf	XPO4	-	-
chr2:73237504-73237554:mpeak_108447|chr2_73172228_73298965_SFXN5_NM_-|	20.3912	-4.15874	1.89089	-2.19936	0.0278526	0.362938	0	0	0	0	1.05594	9.95368	26.3833	16.9214	64.161	38.7923	22.1748	65.2519	#DIV/0!	13.0839	-Inf	-0.232053	-Inf	SFXN5	-	-
chr4:22474891-22474941:mpeak_147779|chr4_22390570_22517677_ADGRA3_NM_-|	17.8648	-5.05299	1.7232	-2.93233	0.00336427	0.267856	0	0	0	1.25137	1.05594	7.18877	20.8289	34.9004	76.5294	17.5191	27.4545	27.6491	#DIV/0!	13.0759	-Inf	0.86487	-Inf	ADGRA3	-	-
chr2:120685080-120685172:mpeak_111376|chr2_120517206_120734559_PTPN4_NM_+|	25.6173	-3.38046	1.59391	-2.12086	0.0339336	0.387244	1.3886	0	0	0	4.22377	10.5067	33.3263	43.3611	45.6084	65.071	47.5174	56.4042	3.40632	13.0749	-3.4071	-0.466585	-2.94052	PTPN4	-	-
chr14:50653090-50653145:mpeak_60867|chr14_50585571_50698099_SOS2_NM_-|	32.069	-4.7944	1.94127	-2.46973	0.0135215	0.293236	0	0	0	2.50273	0	14.3775	26.3833	34.9004	112.862	35.0382	33.7902	124.974	#DIV/0!	13.0651	-Inf	-0.154295	-Inf	SOS2	-	-
chr12:32741341-32741391:mpeak_43487|chr12_32638905_32793209_FGD4_NM_+|	35.0298	-4.27874	1.76432	-2.42514	0.0153024	0.299241	0	0	0	0	0	8.29473	61.0982	63.4553	96.628	83.8415	51.7412	55.2982	#DIV/0!	13.0365	-Inf	0.212558	-Inf	FGD4	-	-
chr3:16341695-16341749:mpeak_132879|chr3_16306666_16344914_OXNAD1_NM_+|	32.0211	-3.89932	1.77978	-2.1909	0.0284592	0.3645	0	0	0	0	0	8.84772	56.9325	47.5915	67.2531	88.847	51.7412	63.04	#DIV/0!	13.0351	-Inf	-0.2454	-Inf	OXNAD1	-	-
chr6:30647412-30647462:mpeak_171483|chr6_30645065_30655672_PPP1R18_NM_-|	59.7055	-4.53273	1.9617	-2.31061	0.0208544	0.327265	0	0	0	0	0	17.6954	97.2018	67.6857	124.457	138.902	67.5803	202.944	#DIV/0!	12.966	-Inf	-0.500817	-Inf	PPP1R18	-	-
chr1:180774498-180774548:mpeak_15909|chr1_180601145_180853141_XPR1_NM_+|	40.9813	-4.57781	1.79014	-2.55723	0.0105509	0.28376	0	0	0	0	0	8.84772	74.9842	63.4553	139.144	87.5956	59.1328	58.6161	#DIV/0!	12.9262	-Inf	0.434877	-Inf	XPR1	-	-
chr14:39882587-39882637:mpeak_60422|chr14_39868991_39901704_FBXO33_NM_-|	54.7539	-3.61755	1.8428	-1.96307	0.0496379	0.454932	0	1.05759	0	0	0	14.9305	91.6474	96.2405	105.904	110.12	71.8041	165.342	1.07994	12.8983	-3.81941	-0.241245	-3.57817	FBXO33	-	-
chr17:76718879-76718932:mpeak_91544|chr17_76672251_76778424_CYTH1_NM_-|	45.2162	-4.23722	1.97086	-2.14993	0.0315608	0.377618	0	0	0	0	0	12.7186	51.3781	46.5339	135.279	65.071	60.1887	171.424	#DIV/0!	12.8607	-Inf	-0.347415	-Inf	CYTH1	-	-
chr4:119740129-119740179:mpeak_153440|chr4_119644810_119757326_SEC24D_NM_-|	48.5779	-4.60846	1.90863	-2.41453	0.0157554	0.300524	0	0	0	0	0	11.6126	74.9842	60.2825	163.881	71.3279	55.965	144.881	#DIV/0!	12.7998	-Inf	0.136328	-Inf	SEC24D	-	-
chr8:146000212-146000262:mpeak_201339|chr8_145999990_146012730_ZNF34_NM_-|	22.4631	-4.23697	1.68749	-2.51081	0.0120453	0.289771	0	0	0	0	3.16783	8.84772	48.6009	20.0942	47.9275	46.3005	33.7902	60.828	#DIV/0!	12.7899	-Inf	-0.273017	-Inf	ZNF34	-	-
chr14:89866554-89866604:mpeak_64886|chr14_89629313_90085494_FOXN3_NM_-|	53.705	-5.01995	1.76044	-2.85153	0.00435092	0.267856	0	0	0	0	0	10.5067	119.419	126.911	140.69	62.5683	88.6992	95.6659	#DIV/0!	12.7646	-Inf	0.648287	-Inf	FOXN3	-	-
chr14:89868844-89868894:mpeak_64890|chr14_89629313_90085494_FOXN3_NM_-|	53.705	-5.01995	1.76044	-2.85153	0.00435092	0.267856	0	0	0	0	0	10.5067	119.419	126.911	140.69	62.5683	88.6992	95.6659	#DIV/0!	12.7646	-Inf	0.648287	-Inf	FOXN3	-	-
chr11:77419844-77419894:mpeak_37529|chr11_77378536_77531880_RSF1_NM_-|	36.5203	-4.24199	1.75548	-2.41642	0.015674	0.300222	0	0	0	0	0	8.84772	73.5956	78.2615	69.5722	86.3443	70.7482	50.8744	#DIV/0!	12.7632	-Inf	0.0904931	-Inf	RSF1	-	-
chr4:13480519-13480569:mpeak_147304|chr4_13370274_13485989_RAB28_NM_-|	47.5922	-4.27931	2.10941	-2.02868	0.0424909	0.426641	0	0	0	0	0	13.2716	31.9377	44.4187	169.292	82.5902	32.7342	196.862	#DIV/0!	12.7535	-Inf	-0.34581	-Inf	RAB28	-	-
chr14:51212213-51212275:mpeak_60996|chr14_51190390_51297839_NIN_NM_-|	20.2244	-3.6637	1.75893	-2.08291	0.0372591	0.403062	0	1.05759	0	1.25137	1.05594	13.2716	19.4404	33.8428	50.2466	32.5355	26.3986	63.593	3.06459	12.7146	-3.88074	-0.243055	-3.63769	NIN	-	-
chr14:78361823-78361873:mpeak_64609|chr14_78266425_78399562_ADCK1_NM_+|	27.633	-5.08021	1.73784	-2.9233	0.00346345	0.267856	0	0	0	0	2.11189	7.74175	48.6009	57.1098	99.7201	63.8197	35.9021	16.5895	#DIV/0!	12.7077	-Inf	0.820662	-Inf	ADCK1	-	-
chr18:74162180-74162236:mpeak_95654|chr18_74074512_74207146_ZNF516_NM_-|	40.8391	-3.64962	1.72053	-2.12122	0.0339033	0.387244	1.3886	0	0	0	0	8.29473	102.756	79.3191	102.039	60.0656	89.7551	46.4505	1.46624	12.6785	-2.57857	0.533624	-3.11219	ZNF516	-	-
chr6:144782033-144782083:mpeak_178701|chr6_144612872_145172124_UTRN_NM_+|	20.4388	-4.10229	1.83685	-2.23333	0.0255275	0.350893	0	0	0	1.25137	0	9.4007	23.6061	27.4973	56.4308	26.2787	31.6783	69.1228	#DIV/0!	12.5733	-Inf	-0.240939	-Inf	UTRN	-	-
chr22:34033255-34033305:mpeak_129906|chr22_33670610_34316416_LARGE_NM_-|	57.5358	-5.09234	1.75909	-2.89488	0.00379306	0.267856	0	0	0	0	0	11.0596	143.025	129.026	143.009	101.361	85.5314	77.4175	#DIV/0!	12.5531	-Inf	0.651094	-Inf	LARGE	-	-
chr22:34033599-34033649:mpeak_129907|chr22_33670610_34316416_LARGE_NM_-|	57.5358	-5.09234	1.75909	-2.89488	0.00379306	0.267856	0	0	0	0	0	11.0596	143.025	129.026	143.009	101.361	85.5314	77.4175	#DIV/0!	12.5531	-Inf	0.651094	-Inf	LARGE	-	-
chr15:68411244-68411312:mpeak_70824|chr15_68346571_68479879_PIAS1_NM_+|	19.2222	-3.71784	1.84096	-2.01951	0.043434	0.430679	1.3886	0	0	2.50273	3.16783	7.18877	13.886	14.8062	85.0326	15.0164	16.8951	70.7817	3.66304	12.5221	-3.21112	0.147207	-3.35832	PIAS1	-	-
chr20:5163415-5163468:mpeak_120696|chr20_5107406_5170747_CDS2_NM_+|	54.8784	-4.86227	1.99619	-2.43578	0.0148598	0.296472	0	0	0	0	0	11.6126	54.1553	70.8584	243.503	58.8142	57.0209	162.577	#DIV/0!	12.5131	-Inf	0.404507	-Inf	CDS2	-	-
chr1:222891449-222891643:mpeak_19012|chr1_222885894_222905969_BROX_NM_+|	46.6331	-2.99709	1.33041	-2.25276	0.0242743	0.34431	5.55439	0	0	10.0109	7.3916	11.6126	56.9325	81.4343	154.605	58.8142	31.6783	141.563	5.68764	12.5035	-2.38511	0.336288	-2.7214	BROX	-	-
chr1:185031707-185031760:mpeak_16256|chr1_185014550_185069331_RNF2_NM_+|	22.5692	-4.32177	1.78553	-2.42044	0.0155017	0.299755	0	0	0	1.25137	0	9.95368	24.9947	35.958	64.161	40.0437	36.958	57.5102	#DIV/0!	12.4952	-Inf	-0.104493	-Inf	RNF2	-	-
chr3:154033250-154033311:mpeak_142610|chr3_153994145_154042286_DHX36_NM_-|	17.9591	-4.34856	1.92455	-2.25952	0.023851	0.342057	0	0	0	1.25137	1.05594	11.6126	16.6632	25.3821	47.1545	16.2678	13.7273	82.3944	#DIV/0!	12.3855	-Inf	-0.333394	-Inf	DHX36	-	-
chr18:14214205-14214265:mpeak_93140|chr18_14179095_14225671_ANKRD20A5P_NR_+|	32.1032	-3.73936	1.57129	-2.37981	0.0173217	0.308962	0	2.11518	0	2.50273	2.11189	14.3775	38.8807	64.5129	106.677	32.5355	84.4754	37.0498	3.02066	12.3277	-3.16655	0.447377	-3.61393	ANKRD20A5P	-	-
chr5:150828053-150828103:mpeak_167051|chr5_150816552_150867543_SLC36A1_NM_+|	21.5112	-3.90708	1.91046	-2.0451	0.0408448	0.419078	0	0	0	0	1.05594	11.0596	20.8289	23.2669	53.3387	28.7814	27.4545	92.348	#DIV/0!	12.2311	-Inf	-0.608773	-Inf	SLC36A1	-	-
chr2:219394869-219395019:mpeak_118467|chr2_219319740_219433084_USP37_NM_-|	54.6579	-2.43375	1.17592	-2.06966	0.0384839	0.40975	1.3886	5.28794	0.773024	7.5082	5.27971	23.7782	73.5956	71.916	166.973	123.885	53.8531	121.656	2.38398	12.2134	-2.29528	0.0617388	-2.35702	USP37	-	-
chr2:75150152-75150202:mpeak_108808|chr2_75136257_75165434_LINC01291_NR_+|	36.2417	-4.60297	1.6888	-2.72559	0.0064187	0.269761	0	1.05759	0	0	1.05594	9.4007	72.207	103.644	119.046	27.5301	63.3566	37.6028	1.07589	12.2072	-3.30557	1.19856	-4.50413	LINC01291	-	-
chrX:119063489-119063602:mpeak_214211|chrX_119059357_119077735_NKAP_NM_-|	19.0361	-4.83499	1.62583	-2.97386	0.00294081	0.267856	0	0	0	2.50273	1.05594	7.74175	31.9377	39.1308	53.3387	30.0328	19.007	43.6856	#DIV/0!	12.187	-Inf	0.424034	-Inf	NKAP	-	-
chr22:25475877-25475962:mpeak_129064|chr22_25423940_25588372_KIAA1671_NM_+|	47.5339	-4.4982	1.82819	-2.46047	0.0138755	0.293511	0	0	0	0	0	11.0596	124.974	104.701	57.2038	110.12	98.2027	64.1459	#DIV/0!	12.1771	-Inf	0.0743497	-Inf	KIAA1671	-	-
chr6:167420374-167420424:mpeak_180633|chr6_167412804_167453391_FGFR1OP_NM_+|	27.9695	-4.52387	1.90834	-2.37058	0.0177602	0.312035	0	0	0	0	1.05594	12.7186	30.5491	27.4973	93.5359	35.0382	40.1258	95.1129	#DIV/0!	12.1342	-Inf	-0.167782	-Inf	FGFR1OP	-	-
chr9:20413557-20413701:mpeak_202311|chr9_20346572_20622542_MLLT3_NM_-|	30.1655	-4.64039	1.63787	-2.83318	0.0046087	0.267856	0	0	0	0	5.27971	9.4007	34.7149	49.7067	81.1675	41.2951	59.1328	81.2884	#DIV/0!	12.1181	-Inf	-0.13408	-Inf	MLLT3	-	-
chr14:96839098-96839148:mpeak_65644|chr14_96829788_96851859_GSKIP_NM_+|	56.7492	-4.87204	1.932	-2.52176	0.0116771	0.288153	0	0	0	0	0	11.6126	80.5386	83.5495	217.22	68.8251	52.7971	166.448	#DIV/0!	12.0936	-Inf	0.404537	-Inf	GSKIP	-	-
chr1:211449364-211449418:mpeak_18272|chr1_211432707_211486765_RCOR3_NM_+|	26.5875	-4.36613	1.76139	-2.4788	0.0131824	0.292154	0	0	0	0	1.05594	12.7186	44.4351	54.9946	34.7861	52.5574	54.909	63.593	#DIV/0!	12.0787	-Inf	-0.349943	-Inf	RCOR3	-	-
chr1:89281908-89281958:mpeak_7007|chr1_89149921_89298927_PKN2_NM_+|	52.5763	-4.67686	1.83731	-2.54549	0.0109123	0.286712	0	0	0	0	0	11.6126	84.7044	96.2405	149.194	72.5792	73.916	142.669	#DIV/0!	12.0478	-Inf	0.191181	-Inf	PKN2	-	-
chr7:152029221-152029383:mpeak_190967|chr7_151834009_152133090_KMT2C_NM_-|	60.2914	-2.16346	0.949875	-2.27762	0.022749	0.336898	5.55439	3.17277	2.31907	3.7541	15.8391	16.0365	113.865	87.7798	179.342	77.5847	97.1467	121.103	2.89938	12.0438	-1.68953	0.364949	-2.05448	KMT2C	-	-
chr1:70751681-70751734:mpeak_6368|chr1_70728530_70820417_ANKRD13C_NM_-|	23.9105	-2.84745	1.35594	-2.09999	0.0357299	0.395202	0	0	2.31907	6.25683	1.05594	4.97684	70.8184	29.6125	69.5722	45.0492	28.5105	28.7551	4.09241	12.0116	-2.40582	0.732547	-3.13837	ANKRD13C	-	-
chr22:20871059-20871124:mpeak_128634|chr22_20861828_20940854_MED15_NM_+|	36.0731	-5.01316	1.90708	-2.62871	0.00857093	0.273381	0	0	0	0	1.05594	14.9305	40.2693	50.7642	126.003	42.5464	41.1818	116.126	#DIV/0!	11.9986	-Inf	0.118987	-Inf	MED15	-	-
chr2:32681507-32681557:mpeak_105164|chr2_32582095_32842791_BIRC6_NM_+|	43.2112	-4.22513	1.98838	-2.12491	0.0335939	0.386477	0	0	0	0	0	10.5067	44.4351	39.1308	161.562	76.3333	42.2377	144.328	#DIV/0!	11.9894	-Inf	-0.100976	-Inf	BIRC6	-	-
chr5:102465716-102465766:mpeak_163009|chr5_102455957_102537222_PPIP5K2_NM_+|	25.5509	-4.6153	1.62371	-2.84245	0.00447683	0.267856	0	0	0	0	3.16783	7.74175	37.4921	48.6491	72.6643	58.8142	44.3496	33.7319	#DIV/0!	11.9539	-Inf	0.214183	-Inf	PPIP5K2	-	-
chr5:176407117-176407171:mpeak_168237|chr5_176332493_176433795_UIMC1_NM_-|	30.4141	-4.80133	2.15777	-2.22513	0.0260724	0.353372	0	0	0	0	1.05594	11.6126	22.2175	21.1518	148.421	25.0273	11.6154	123.868	#DIV/0!	11.839	-Inf	0.256857	-Inf	UIMC1	-	-
chr19:17833048-17833098:mpeak_97917|chr19_17830260_17845081_MAP1S_NM_+|	24.7848	-4.64576	1.85362	-2.50632	0.0121995	0.289971	0	0	0	1.25137	0	8.29473	90.2588	56.0522	20.0986	58.8142	43.2937	19.3544	#DIV/0!	11.789	-Inf	0.454231	-Inf	MAP1S	-	-
chr6:38427763-38427813:mpeak_172621|chr6_38142958_38607924_BTBD9_NM_-|	28.4306	-4.58296	1.69229	-2.70814	0.00676617	0.269946	0	0	0	0	2.11189	11.0596	44.4351	78.2615	37.1052	52.5574	57.0209	58.6161	#DIV/0!	11.7467	-Inf	-0.0738462	-Inf	BTBD9	-	-
chr3:142106938-142106988:mpeak_141714|chr3_142030655_142166904_XRN1_NM_-|	38.3218	-4.11401	1.86006	-2.21176	0.0269833	0.358109	0	0	0	0	0	8.84772	49.9895	61.3401	113.635	42.5464	60.1887	123.315	#DIV/0!	11.7421	-Inf	-0.00694836	-Inf	XRN1	-	-
chr21:32684883-32684933:mpeak_126496|chr21_32493155_32931290_TIAM1_NM_-|	46.429	-4.29877	1.86972	-2.29915	0.0214965	0.329809	0	0	0	0	0	11.0596	91.6474	62.3977	108.223	63.8197	60.1887	159.812	#DIV/0!	11.6901	-Inf	-0.113933	-Inf	TIAM1	-	-
chr12:39801157-39801285:mpeak_43780|chr12_39688319_39837192_KIF21A_NM_-|	33.0808	-2.76148	1.31599	-2.0984	0.0358696	0.395721	2.77719	2.11518	0	5.00546	5.27971	3.87088	44.4351	44.4187	167.746	43.7978	21.1189	56.4042	2.85992	11.6683	-1.53281	1.08069	-2.61351	KIF21A	-	-
chr3:5234453-5234503:mpeak_131706|chr3_5229358_5257513_EDEM1_NM_+|	39.4552	-3.58199	1.66379	-2.15291	0.031326	0.377019	0	0	1.54605	0	7.3916	6.0828	49.9895	48.6491	186.299	43.7978	28.5105	101.196	1.62778	11.6491	-3.12356	0.715676	-3.83924	EDEM1	-	-
chr5:118668154-118668209:mpeak_164175|chr5_118604386_118728510_TNFAIP8_NM_+|	27.3719	-3.68328	1.68864	-2.18121	0.0291676	0.366525	0	0	0	2.50273	17.951	7.18877	13.886	13.7486	35.5591	50.0546	44.3496	143.222	#DIV/0!	11.6328	-Inf	-1.91084	-Inf	TNFAIP8	-	-
chr19:50732678-50732728:mpeak_101438|chr19_50706884_50812896_MYH14_NM_+|	49.6156	-3.13554	1.12834	-2.77889	0.00545445	0.267856	2.77719	2.11518	0	10.0109	8.44754	9.4007	83.3158	60.2825	179.342	83.8415	60.1887	95.6659	2.27242	11.6227	-2.50955	0.430059	-2.93961	MYH14	-	-
chr7:47532023-47532076:mpeak_184008|chr7_47317818_47621742_TNS3_NM_-|	35.6325	-2.73694	1.38829	-1.97145	0.0486722	0.450866	0	4.23035	0	5.00546	10.5594	2.76491	45.8237	45.4763	155.378	37.541	41.1818	79.6294	5.14479	11.5753	-2.11534	0.639491	-2.75483	TNS3	-	-
chr3:12550507-12550567:mpeak_132330|chr3_12525930_12574160_TSEN2_NM_+|	19.0114	-3.63453	1.66988	-2.17652	0.0295167	0.368747	0	0	0	0	2.11189	8.29473	30.5491	21.1518	30.921	53.8087	46.4615	34.8379	#DIV/0!	11.5537	-Inf	-0.709519	-Inf	TSEN2	-	-
chr7:99928321-99928454:mpeak_187017|chr7_99918707_99933930_PMS2P1_NR_-|	33.875	-3.10556	1.26514	-2.45472	0.0140995	0.293546	0	3.17277	0	6.25683	7.3916	3.31789	99.9789	88.8374	50.2466	71.3279	42.2377	33.7319	3.9815	11.5184	-2.41886	0.698658	-3.11752	PMS2P1	-	-
chr1:156251300-156251358:mpeak_13575|chr1_156220461_156252620_SMG5_NM_-|	34.5221	-5.4677	1.56855	-3.48582	0.000490626	0.267856	0	0	0	6.25683	7.3916	6.0828	43.0465	50.7642	129.095	36.2896	38.0139	97.3249	#DIV/0!	11.4965	-Inf	0.377145	-Inf	SMG5	-	-
chr3:65378151-65378201:mpeak_136714|chr3_65342807_66024509_MAGI1_NM_-|	46.6071	-4.69012	1.75277	-2.67583	0.00745435	0.271992	0	0	0	0	0	8.29473	97.2018	97.2981	139.917	48.8033	65.4685	102.302	#DIV/0!	11.49	-Inf	0.626793	-Inf	MAGI1	-	-
chr3:65672409-65672459:mpeak_136760|chr3_65342807_66024509_MAGI1_NM_-|	46.6071	-4.69012	1.75277	-2.67583	0.00745435	0.271992	0	0	0	0	0	8.29473	97.2018	97.2981	139.917	48.8033	65.4685	102.302	#DIV/0!	11.49	-Inf	0.626793	-Inf	MAGI1	-	-
chr15:86127819-86127869:mpeak_72858|chr15_85923846_86287858_AKAP13_NM_+|	49.6688	-4.44446	1.88268	-2.36071	0.0182399	0.313389	0	0	0	0	0	11.0596	84.7044	89.895	121.365	62.5683	52.7971	173.636	#DIV/0!	11.4805	-Inf	0.0343437	-Inf	AKAP13	-	-
chr15:44101943-44102113:mpeak_68108|chr15_44097474_44116951_MFAP1_NM_-|	20.3687	-3.83099	1.57373	-2.43434	0.0149188	0.296852	0	0	0	6.25683	9.50349	1.65895	22.2175	24.3245	28.6019	50.0546	33.7902	68.0168	#DIV/0!	11.4705	-Inf	-1.01503	-Inf	MFAP1	-	-
chr15:93470892-93470942:mpeak_73458|chr15_93443550_93567601_CHD2_NM_+|	40.7925	-4.3101	1.88111	-2.29125	0.0219487	0.33213	0	0	0	0	0	8.29473	44.4351	59.225	160.016	46.3005	62.3006	108.938	#DIV/0!	11.439	-Inf	0.277494	-Inf	CHD2	-	-
chr14:50052490-50052540:mpeak_60699|chr14_50044571_50053134_RPS29_NM_-|	26.0145	-2.71286	1.27496	-2.1278	0.0333533	0.385911	0	3.17277	0	5.00546	3.16783	5.52982	37.4921	61.3401	76.5294	38.7923	26.3986	54.7452	5.42781	11.4253	-2.11069	0.548066	-2.65876	RPS29	-	-
chr3:123063330-123063380:mpeak_139705|chr3_123003583_123167392_ADCY5_NM_-|	45.847	-4.08683	1.80662	-2.26214	0.0236889	0.341062	0	0	0	0	0	11.6126	61.0982	84.6071	85.8057	80.0874	123.545	103.408	#DIV/0!	11.3464	-Inf	-0.407348	-Inf	ADCY5	-	-
chr2:65284413-65284463:mpeak_107697|chr2_65283494_65310772_CEP68_NM_+|	38.8753	-4.07173	1.76323	-2.30925	0.02093	0.327469	0	0	0	0	0	8.84772	47.2123	92.0102	83.4866	78.8361	78.1398	77.9705	#DIV/0!	11.2975	-Inf	-0.0771709	-Inf	CEP68	-	-
chr5:100220662-100220779:mpeak_162877|chr5_100147833_100238989_ST8SIA4_NM_-|	23.1255	-4.91689	1.57326	-3.12529	0.00177629	0.267856	0	0	0	1.25137	3.16783	9.4007	43.0465	34.9004	63.388	38.7923	33.7902	49.7684	#DIV/0!	11.2953	-Inf	0.208093	-Inf	ST8SIA4	-	-
chr14:61242751-61242801:mpeak_62110|chr14_61201458_61434946_MNAT1_NM_+|	40.2648	-3.80868	1.89324	-2.01172	0.044249	0.433269	0	0	0	0	0	10.5067	34.7149	53.937	104.358	72.5792	64.4125	142.669	#DIV/0!	11.2708	-Inf	-0.535003	-Inf	MNAT1	-	-
chr17:19726678-19726728:mpeak_84277|chr17_19679720_19771239_ULK2_NM_-|	30.1558	-4.91735	1.61796	-3.03923	0.0023718	0.267856	0	0	0	0	2.11189	8.84772	76.3728	52.8794	75.7564	46.3005	57.0209	42.5796	#DIV/0!	11.2675	-Inf	0.490694	-Inf	ULK2	-	-
chr2:106483930-106483980:mpeak_110554|chr2_106361519_106509437_NCK2_NM_+|	33.931	-3.75383	1.76154	-2.13099	0.0330899	0.385654	0	1.05759	0	2.50273	0	12.7186	41.6579	58.1674	88.1247	48.8033	38.0139	116.126	1.68809	11.2504	-3.84724	-0.110729	-3.73651	NCK2	-	-
chr3:123675147-123675197:mpeak_139800|chr3_123634565_123680255_CCDC14_NM_-|	51.0101	-4.48435	1.79487	-2.49842	0.0124747	0.290215	0	0	0	0	0	11.0596	88.8702	74.0312	143.009	96.3552	99.2586	99.5368	#DIV/0!	11.2414	-Inf	0.0516597	-Inf	CCDC14	-	-
chr15:64805103-64805153:mpeak_70321|chr15_64791618_64973890_ZNF609_NM_+|	52.8382	-4.7248	2.12793	-2.22037	0.0263935	0.354982	0	0	0	0	0	9.4007	51.3781	44.4187	277.516	50.0546	23.2307	178.06	#DIV/0!	11.2204	-Inf	0.570711	-Inf	ZNF609	-	-
chr3:142121848-142121898:mpeak_141723|chr3_142030655_142166904_XRN1_NM_-|	39.1961	-3.07339	1.54587	-1.98813	0.0467975	0.442953	1.3886	1.05759	0	0	5.27971	11.6126	49.9895	61.3401	113.635	42.5464	60.1887	123.315	1.63105	11.2092	-2.78776	-0.00694836	-2.78082	XRN1	-	-
chr20:30790980-30791030:mpeak_122124|chr20_30785485_30795546_PLAGL2_NM_-|	41.7346	-4.15403	1.75442	-2.36775	0.0178964	0.312966	0	0	0	0	0	9.4007	91.6474	81.4343	66.4801	75.082	73.916	102.855	#DIV/0!	11.1979	-Inf	-0.0721824	-Inf	PLAGL2	-	-
chr1:8600722-8600772:mpeak_671|chr1_8415180_8877699_RERE_NM_-|	72.9354	-5.14876	1.96	-2.62692	0.00861615	0.27443	0	0	0	0	0	13.2716	87.4816	103.644	314.621	77.5847	83.4195	195.203	#DIV/0!	11.1774	-Inf	0.505698	-Inf	RERE	-	-
chr3:14707917-14707967:mpeak_132559|chr3_14693252_14712402_CCDC174_NM_+|	21.7845	-4.24298	1.69235	-2.50715	0.012171	0.289971	0	0	0	1.25137	0	7.74175	43.0465	31.7277	55.6577	41.2951	35.9021	44.7916	#DIV/0!	11.0581	-Inf	0.096549	-Inf	CCDC174	-	-
chr13:41544862-41544912:mpeak_55346|chr13_41508164_41593508_ELF1_NM_-|	69.9424	-5.2378	1.82159	-2.8754	0.00403511	0.267856	0	0	0	0	0	11.0596	130.528	120.565	276.743	76.3333	90.8111	133.269	#DIV/0!	11.0444	-Inf	0.813141	-Inf	ELF1	-	-
chr4:147107929-147107979:mpeak_155000|chr4_147096834_147110773_LSM6_NM_+|	48.5671	-4.22441	2.00308	-2.10896	0.0349484	0.391357	0	0	0	0	0	11.0596	44.4351	45.4763	179.342	81.3388	47.5174	173.636	#DIV/0!	10.9685	-Inf	-0.167938	-Inf	LSM6	-	-
chr3:123157509-123157661:mpeak_139714|chr3_123003583_123167392_ADCY5_NM_-|	46.7436	-4.96198	1.62231	-3.05859	0.00222383	0.267856	0	0	0	0	6.33566	16.0365	61.0982	84.6071	85.8057	80.0874	123.545	103.408	#DIV/0!	10.9296	-Inf	-0.407348	-Inf	ADCY5	-	-
chr1:230226476-230226526:mpeak_19685|chr1_230202941_230227335_GALNT2_NR_+mpeak_19685|chr1_230193535_230415048_GALNT2_NM_+||	38.9105	-4.01501	2.03441	-1.97355	0.0484327	0.450275	0	0	0	0	0	8.29473	33.3263	37.0156	160.016	38.7923	39.0699	150.411	#DIV/0!	10.9011	-Inf	0.0131142	-Inf	GALNT2	-	-
chr1:180808895-180808981:mpeak_15912|chr1_180601145_180853141_XPR1_NM_+|	42.4539	-2.90805	1.21715	-2.38923	0.0168839	0.307151	0	4.23035	0	7.5082	3.16783	11.6126	74.9842	63.4553	139.144	87.5956	59.1328	58.6161	4.57197	10.8543	-2.39746	0.434877	-2.83234	XPR1	-	-
chr5:77581652-77581702:mpeak_161454|chr5_77298879_77590579_AP3B1_NM_-|	26.0543	-4.5562	2.06418	-2.20727	0.0272955	0.360385	0	0	0	0	1.05594	8.29473	13.886	21.1518	138.371	26.2787	19.007	84.6063	#DIV/0!	10.7982	-Inf	0.416867	-Inf	AP3B1	-	-
chr9:136212931-136212981:mpeak_209684|chr9_136211188_136215011_MED22_NM_-|	42.4784	-3.84566	1.88789	-2.03701	0.0416486	0.422429	0	0	0	0	0	10.5067	79.15	39.1308	88.8978	55.0601	74.9719	162.024	#DIV/0!	10.7925	-Inf	-0.49537	-Inf	MED22	-	-
chr3:31960686-31960736:mpeak_133676|chr3_31703608_32023342_OSBPL10_NM_-|	42.5368	-4.09114	1.76167	-2.32231	0.020216	0.321889	0	0	0	0	0	9.4007	63.8754	78.2615	96.628	82.5902	70.7482	108.938	#DIV/0!	10.7528	-Inf	-0.135494	-Inf	OSBPL10	-	-
chr13:111914383-111914433:mpeak_58545|chr13_111767623_111955337_ARHGEF7_NM_+|	25.7424	-3.61384	1.71434	-2.108	0.0350307	0.391531	0	1.05759	0	0	1.05594	8.29473	36.1035	39.1308	92.7629	37.541	45.4055	47.5565	1.88858	10.7477	-3.14429	0.364354	-3.50865	ARHGEF7	-	-
chr2:32589044-32589094:mpeak_105133|chr2_32582095_32842791_BIRC6_NM_+|	43.119	-4.0801	1.9686	-2.07259	0.0382101	0.407907	0	0	0	0	0	9.4007	44.4351	39.1308	161.562	76.3333	42.2377	144.328	#DIV/0!	10.7273	-Inf	-0.100976	-Inf	BIRC6	-	-
chr1:180687347-180687398:mpeak_15899|chr1_180601145_180853141_XPR1_NM_+|	41.4674	-5.22161	1.59674	-3.27017	0.00107482	0.267856	0	0	0	0	5.27971	9.4007	74.9842	63.4553	139.144	87.5956	59.1328	58.6161	#DIV/0!	10.7237	-Inf	0.434877	-Inf	XPR1	-	-
chr3:150291441-150291524:mpeak_142315|chr3_150264573_150301632_EIF2A_NM_+|	49.7988	-4.82897	1.7443	-2.76843	0.0056327	0.267856	0	1.05759	0	6.25683	1.05594	22.6723	44.4351	56.0522	186.299	73.8306	65.4685	140.457	1.10632	10.7183	-4.82539	0.0358031	-4.8612	EIF2A	-	-
chr22:34311643-34311693:mpeak_129995|chr22_33670610_34316416_LARGE_NM_-|	57.3976	-4.89169	1.71615	-2.85038	0.0043667	0.267856	0	0	0	0	0	9.4007	143.025	129.026	143.009	101.361	85.5314	77.4175	#DIV/0!	10.6701	-Inf	0.651094	-Inf	LARGE	-	-
chr6:122812165-122812215:mpeak_177166|chr6_122793061_123046272_PKIB_NM_+|	97.1359	-5.53051	1.9527	-2.83224	0.00462229	0.267856	0	0	0	0	0	16.0365	247.17	127.968	323.124	201.47	60.1887	189.673	#DIV/0!	10.6594	-Inf	0.629582	-Inf	PKIB	-	-
chr6:151198028-151198088:mpeak_179210|chr6_151186814_151422661_MTHFD1L_NM_+|	40.3161	-3.05665	1.28786	-2.37344	0.0176232	0.310995	1.3886	0	1.54605	7.5082	8.44754	7.74175	48.6009	57.1098	129.095	58.8142	38.0139	125.527	1.87473	10.6575	-3.01348	0.0786016	-3.09208	MTHFD1L	-	-
chr12:63286347-63286397:mpeak_46852|chr12_63042416_63328665_PPM1H_NM_-|	61.0856	-4.67366	1.93067	-2.42075	0.0154887	0.299755	0	0	0	0	0	12.1656	80.5386	75.0888	222.631	83.8415	70.7482	188.014	#DIV/0!	10.6528	-Inf	0.142831	-Inf	PPM1H	-	-
chr2:86718709-86718862:mpeak_109284|chr2_86668270_86719161_KDM3A_NM_+|	36.6845	-4.84292	1.99181	-2.43142	0.0150398	0.297588	0	0	0	0	8.44754	5.52982	18.0518	28.5549	182.434	28.7814	28.5105	139.905	#DIV/0!	10.6321	-Inf	0.215968	-Inf	KDM3A	-	-
chr3:140954791-140954846:mpeak_141462|chr3_140950666_141011109_PXYLP1_NM_+|	18.9712	-3.33058	1.61591	-2.06112	0.0392918	0.412293	0	1.05759	0	3.7541	2.11189	6.0828	19.4404	22.2094	60.2959	26.2787	31.6783	54.7452	3.11221	10.6021	-3.49801	-0.144717	-3.3533	PXYLP1	-	-
chr7:97813290-97813340:mpeak_186668|chr7_97736196_97834775_LMTK2_NM_+|	18.5407	-3.5292	1.67696	-2.10453	0.0353322	0.393089	1.3886	0	0	1.25137	1.05594	8.29473	43.0465	46.5339	20.8716	46.3005	21.1189	32.626	3.77158	10.5972	-2.93264	0.142766	-3.07541	LMTK2	-	-
chr11:118938948-118939001:mpeak_39957|chr11_118938462_118952168_VPS11_NM_+|	62.693	-2.78039	1.0898	-2.55129	0.0107326	0.285037	5.55439	2.11518	0	7.5082	4.22377	19.9074	141.637	117.392	155.378	112.623	101.371	84.6063	2.7761	10.5959	-2.0445	0.472835	-2.51734	VPS11	-	-
chr9:5093363-5093413:mpeak_201734|chr9_4985244_5126683_JAK2_NM_+|	34.1408	-3.37666	1.26283	-2.67389	0.00749779	0.272454	0	2.11518	0.773024	1.25137	4.22377	7.18877	105.533	113.162	55.6577	51.306	36.958	31.52	1.5791	10.5723	-2.13248	1.1956	-3.32808	JAK2	-	-
chr1:117659444-117659544:mpeak_10238|chr1_117655075_117664411_TRIM45_NM_-|	25.4464	-4.60001	1.52428	-3.01783	0.00254592	0.267856	0	0	0	2.50273	5.27971	9.4007	31.9377	35.958	57.2038	61.3169	34.8461	66.9109	#DIV/0!	10.537	-Inf	-0.38245	-Inf	TRIM45	-	-
chr3:25798145-25798195:mpeak_133439|chr3_25761126_25831530_NGLY1_NM_-|	27.9897	-3.7712	1.79154	-2.10501	0.0352906	0.393045	0	1.05759	0	3.7541	2.11189	12.7186	13.886	35.958	89.6708	32.5355	26.3986	117.785	2.27414	10.5164	-4.13526	-0.341042	-3.79421	NGLY1	-	-
chr2:36703485-36703564:mpeak_105366|chr2_36583369_36775667_CRIM1_NM_+|	37.1218	-3.69519	1.58144	-2.33661	0.0194597	0.317036	0	2.11518	0	3.7541	1.05594	14.3775	62.4868	53.937	125.23	43.7978	36.958	101.749	2.62588	10.5135	-3.18132	0.405009	-3.58633	CRIM1	-	-
chr17:2175557-2175675:mpeak_82143|chr17_1964916_2207069_SMG6_NM_-|	63.8884	-2.65296	1.18497	-2.23884	0.0251665	0.348725	5.55439	2.11518	0	1.25137	13.7273	19.9074	112.476	120.565	159.243	102.612	99.2586	129.951	2.93265	10.5135	-2.18543	0.241493	-2.42692	SMG6	-	-
chr8:107712432-107712487:mpeak_198270|chr8_107282405_107763033_OXR1_NM_+|	56.572	-4.26317	1.8318	-2.32731	0.0199488	0.320003	0	0	0	0	0	13.2716	74.9842	82.4919	129.095	116.377	117.21	145.434	#DIV/0!	10.5046	-Inf	-0.403385	-Inf	OXR1	-	-
chr3:184628852-184628902:mpeak_144977|chr3_184529930_184769663_VPS8_NM_+|	42.5369	-4.12829	1.72114	-2.39858	0.016459	0.305514	0	0	0	0	0	8.84772	84.7044	84.6071	78.8485	81.3388	79.1957	92.901	#DIV/0!	10.4733	-Inf	-0.0303487	-Inf	VPS8	-	-
chr14:71483430-71483480:mpeak_63510|chr14_71374121_71576511_PCNX_NM_+|	71.1177	-4.99104	1.85417	-2.6918	0.0071068	0.269946	0	0	0	0	0	12.7186	97.2018	133.256	245.822	121.383	87.6433	155.388	#DIV/0!	10.4705	-Inf	0.386231	-Inf	PCNX	-	-
chr14:96804777-96804827:mpeak_65633|chr14_96752322_96829678_ATG2B_NM_-|	41.9092	-4.02588	1.96378	-2.05006	0.0403586	0.417238	0	0	0	0	0	8.84772	24.9947	53.937	161.562	61.3169	62.3006	129.951	#DIV/0!	10.4678	-Inf	-0.0763754	-Inf	ATG2B	-	-
chr15:45880996-45881046:mpeak_68296|chr15_45879416_45898592_BLOC1S6_NM_+|	112.955	-5.88377	1.84279	-3.19285	0.00140875	0.267856	0	0	0	0	0	15.4835	315.211	259.109	321.578	207.727	123.545	112.808	#DIV/0!	10.4599	-Inf	1.01251	-Inf	BLOC1S6	-	-
chr17:67319777-67319833:mpeak_90800|chr17_67243785_67323323_ABCA5_NM_-|	28.4545	-3.04491	1.50498	-2.02322	0.0430505	0.429071	2.77719	0	0	1.25137	10.5594	3.87088	51.3781	71.916	49.4735	23.776	85.5314	40.9207	4.82242	10.4386	-2.49738	0.201679	-2.69906	ABCA5	-	-
chr8:66634349-66634410:mpeak_194732|chr8_66631730_66753969_PDE7A_NM_-|	32.3629	-3.12292	1.31302	-2.37842	0.0173868	0.30944	1.3886	1.05759	0	6.25683	5.27971	8.84772	51.3781	47.5915	71.1182	42.5464	64.4125	88.4772	2.15728	10.4301	-3.05885	-0.200418	-2.85843	PDE7A	-	-
chr6:133114523-133114573:mpeak_177777|chr6_133091475_133119747_SLC18B1_NM_-|	24.1374	-4.14001	1.63633	-2.53006	0.0114045	0.288014	0	0	0	0	2.11189	8.29473	36.1035	47.5915	45.6084	65.071	41.1818	43.6856	#DIV/0!	10.4109	-Inf	-0.21361	-Inf	SLC18B1	-	-
chr8:129007755-129007805:mpeak_200087|chr8_128902873_129113225_PVT1_NR_+|	44.6419	-4.25028	1.72354	-2.46602	0.0136623	0.293236	0	0	0	0	0	8.84772	95.8132	102.586	73.4373	87.5956	84.4754	82.9473	#DIV/0!	10.4083	-Inf	0.092138	-Inf	PVT1	-	-
chr8:129050192-129050242:mpeak_200111|chr8_128902873_129113225_PVT1_NR_+|	44.6419	-4.25028	1.72354	-2.46602	0.0136623	0.293236	0	0	0	0	0	8.84772	95.8132	102.586	73.4373	87.5956	84.4754	82.9473	#DIV/0!	10.4083	-Inf	0.092138	-Inf	PVT1	-	-
chr5:60412473-60412523:mpeak_159823|chr5_60240955_60448530_NDUFAF2_NM_+|	50.7859	-4.33015	1.78891	-2.42055	0.0154972	0.299755	0	0	0	0	0	10.5067	84.7044	80.3767	130.641	116.377	71.8041	115.02	#DIV/0!	10.3957	-Inf	-0.0360343	-Inf	NDUFAF2	-	-
chr7:132606641-132606691:mpeak_189301|chr7_132470421_132766828_CHCHD3_NM_-|	46.741	-4.36901	2.12791	-2.0532	0.0400534	0.415976	0	0	0	0	0	8.29473	45.8237	26.4397	240.41	52.5574	25.3426	162.024	#DIV/0!	10.3717	-Inf	0.382082	-Inf	CHCHD3	-	-
chr7:132624150-132624200:mpeak_189305|chr7_132470421_132766828_CHCHD3_NM_-|	46.741	-4.36901	2.12791	-2.0532	0.0400534	0.415976	0	0	0	0	0	8.29473	45.8237	26.4397	240.41	52.5574	25.3426	162.024	#DIV/0!	10.3717	-Inf	0.382082	-Inf	CHCHD3	-	-
chr7:51189784-51189836:mpeak_184084|chr7_51085265_51384515_COBL_NM_-|	69.8944	-3.83157	1.85305	-2.06771	0.0386677	0.410492	1.3886	0	0	0	0	13.8246	101.368	105.759	215.674	107.617	92.923	200.18	0.985286	10.3498	-3.31553	0.0773811	-3.39291	COBL	-	-
chr15:85968469-85968519:mpeak_72824|chr15_85923846_86287858_AKAP13_NM_+|	49.5766	-4.30912	1.86024	-2.31643	0.0205349	0.323788	0	0	0	0	0	9.95368	84.7044	89.895	121.365	62.5683	52.7971	173.636	#DIV/0!	10.3325	-Inf	0.0343437	-Inf	AKAP13	-	-
chr2:70002654-70002704:mpeak_108088|chr2_69969126_70052587_ANXA4_NM_+|	56.9938	-4.85355	2.01771	-2.40547	0.0161517	0.303114	0	0	0	0	0	8.29473	68.0412	54.9946	311.529	45.0492	41.1818	154.835	#DIV/0!	10.3226	-Inf	0.850142	-Inf	ANXA4	-	-
chr11:82991462-82991512:mpeak_37869|chr11_82973008_82997450_CCDC90B_NM_-|	77.3035	-5.24011	1.95666	-2.67809	0.00740427	0.271829	0	0	0	0	0	11.6126	111.088	107.874	359.456	86.3443	53.8531	197.415	#DIV/0!	10.3189	-Inf	0.776746	-Inf	CCDC90B	-	-
chr10:95228180-95228231:mpeak_27979|chr10_95066758_95242074_MYOF_NM_-|	33.3365	-3.6809	1.45186	-2.53531	0.0112348	0.287912	0	2.11518	0	3.7541	3.16783	7.18877	51.3781	50.7642	144.555	31.2841	42.2377	63.593	2.57219	10.2912	-2.73794	0.84736	-3.5853	MYOF	-	-
chr10:134028137-134028187:mpeak_31134|chr10_134021655_134121477_STK32C_NM_-|	45.2657	-4.03155	1.79089	-2.25114	0.0243768	0.344589	0	0	0	0	0	9.95368	70.8184	71.916	99.7201	105.115	61.2447	124.421	#DIV/0!	10.2693	-Inf	-0.262216	-Inf	STK32C	-	-
chr1:162213023-162213073:mpeak_14155|chr1_162039580_162336841_NOS1AP_NM_+|	32.4724	-5.5286	1.58711	-3.48344	0.000495011	0.267856	0	0	0	1.25137	4.22377	8.29473	98.5903	106.816	36.3321	41.2951	59.1328	33.7319	#DIV/0!	10.2638	-Inf	0.849497	-Inf	NOS1AP	-	-
chr11:33367327-33367377:mpeak_33487|chr11_33278217_33374637_HIPK3_NM_+|	99.0128	-5.8591	1.8188	-3.22141	0.00127563	0.267856	0	0	0	0	0	10.5067	223.564	211.518	435.213	120.131	51.7412	135.481	#DIV/0!	10.2553	-Inf	1.50161	-Inf	HIPK3	-	-
chr4:88949629-88949679:mpeak_151324|chr4_88928798_88996609_PKD2_NM_+|	34.4654	-4.16473	1.65983	-2.50912	0.0121032	0.289771	0	0	0	0	3.16783	14.3775	41.6579	46.5339	51.0196	76.3333	88.6992	91.7951	#DIV/0!	10.2474	-Inf	-0.883523	-Inf	PKD2	-	-
chr20:40200419-40200469:mpeak_123127|chr20_40034129_40247133_CHD6_NM_-|	62.412	-2.90694	1.23877	-2.34664	0.0189437	0.315087	2.77719	3.17277	0	3.7541	8.44754	21.0133	76.3728	116.335	192.483	98.8579	55.965	169.766	2.31702	10.2329	-2.48088	0.246961	-2.72784	CHD6	-	-
chr1:40865606-40865657:mpeak_4014|chr1_40839377_40887647_SMAP2_NM_+|	20.7107	-4.3761	1.52933	-2.86145	0.00421707	0.267856	0	0	0	1.25137	6.33566	4.97684	31.9377	31.7277	49.4735	33.7869	34.8461	54.1923	#DIV/0!	10.2291	-Inf	-0.118512	-Inf	SMAP2	-	-
chr14:74663229-74663279:mpeak_64016|chr14_74551655_74665624_LIN52_NM_+|	55.0406	-4.22623	1.84108	-2.29551	0.0217037	0.331094	0	0	0	0	0	12.1656	130.528	80.3767	77.3024	173.94	85.5314	100.643	#DIV/0!	10.1348	-Inf	-0.321347	-Inf	LIN52	-	-
chr2:239106517-239106569:mpeak_119943|chr2_239079317_239112324_ILKAP_NM_-|	70.5767	-4.49865	1.86312	-2.41457	0.0157536	0.300524	0	0	0	0	0	16.0365	115.254	109.989	130.641	207.727	136.217	131.057	#DIV/0!	10.1283	-Inf	-0.416522	-Inf	ILKAP	-	-
chr11:34978678-34978728:mpeak_33665|chr11_34937676_35016460_PDHX_NM_+|	43.0529	-3.30238	1.32782	-2.48707	0.0128799	0.291257	1.3886	2.11518	0	5.00546	3.16783	11.6126	69.4298	84.6071	143.782	32.5355	49.6293	113.361	1.76471	10.1193	-2.49749	0.607076	-3.10457	PDHX	-	-
chr7:151864675-151864725:mpeak_190900|chr7_151834009_152133090_KMT2C_NM_-|	57.2312	-4.66162	1.7773	-2.62287	0.00871921	0.274963	0	0	0	0	0	9.95368	113.865	87.7798	179.342	77.5847	97.1467	121.103	#DIV/0!	10.0938	-Inf	0.364949	-Inf	KMT2C	-	-
chr19:12005633-12005683:mpeak_97157|chr19_11998669_12024223_ZNF69_NM_+|	23.9528	-4.63509	1.51998	-3.04944	0.00229269	0.267856	0	0	0	2.50273	4.22377	7.18877	51.3781	59.225	24.7368	41.2951	44.3496	52.5333	#DIV/0!	10.0705	-Inf	-0.0299418	-Inf	ZNF69	-	-
chr7:16670815-16670870:mpeak_182077|chr7_16640570_16685442_ANKMY2_NM_-|	46.4783	-4.16103	1.77591	-2.34304	0.0191274	0.315197	0	0	0	0	0	9.4007	55.5439	92.0102	120.592	101.361	77.0838	101.749	#DIV/0!	10.0652	-Inf	-0.0634043	-Inf	ANKMY2	-	-
chr22:34197223-34197273:mpeak_129952|chr22_33670610_34316416_LARGE_NM_-|	57.3515	-4.81774	1.70101	-2.83229	0.00462162	0.267856	0	0	0	0	0	8.84772	143.025	129.026	143.009	101.361	85.5314	77.4175	#DIV/0!	10.0424	-Inf	0.651094	-Inf	LARGE	-	-
chr6:135308795-135308942:mpeak_177849|chr6_135286428_135376036_HBS1L_NM_-|	56.1339	-2.15136	1.07898	-1.99388	0.046165	0.440708	2.77719	4.23035	0	6.25683	7.3916	22.1193	93.036	74.0312	107.45	111.372	93.9789	150.964	3.82902	10.0382	-2.35168	-0.376254	-1.97542	HBS1L	-	-
chr13:73291956-73292008:mpeak_57029|chr13_73284483_73301938_MZT1_NM_-|	61.4932	-2.15562	1.0292	-2.09447	0.0362183	0.397394	4.16579	1.05759	1.54605	11.2623	11.6154	18.8014	62.4868	70.8584	140.69	111.372	95.0349	209.027	2.47027	10.0327	-2.62222	-0.600255	-2.02196	MZT1	-	-
chr5:79969324-79969374:mpeak_161804|chr5_79950466_80171569_MSH3_NM_+|	34.5884	-3.59069	1.59322	-2.25373	0.024213	0.343958	0	1.05759	0	3.7541	0	10.5067	70.8184	52.8794	62.6149	78.8361	77.0838	57.5102	1.70292	10.0226	-3.7532	-0.196037	-3.55716	MSH3	-	-
chr6:88281098-88281148:mpeak_175257|chr6_88224217_88299735_RARS2_NM_-|	53.8707	-4.09864	1.88861	-2.17019	0.0299927	0.371295	0	0	0	0	0	12.1656	65.264	62.3977	141.463	100.109	78.1398	186.908	#DIV/0!	9.99483	-Inf	-0.44024	-Inf	RARS2	-	-
chr13:98005593-98005643:mpeak_57903|chr13_97874542_98043575_MBNL2_NM_+|	46.1066	-3.99832	1.77086	-2.25783	0.0239561	0.34238	0	0	0	0	0	9.95368	95.8132	80.3767	67.2531	107.617	120.377	71.8877	#DIV/0!	9.95758	-Inf	-0.300814	-Inf	MBNL2	-	-
chr16:16065592-16065642:mpeak_75953|chr16_16043433_16235029_ABCC1_NM_+|	38.113	-5.14988	1.85978	-2.76908	0.00562156	0.267856	0	0	0	0	1.05594	9.95368	47.2123	50.7642	182.434	38.7923	35.9021	91.2421	#DIV/0!	9.95226	-Inf	0.756908	-Inf	ABCC1	-	-
chr11:76200144-76200194:mpeak_37370|chr11_76156068_76260995_C11orf30_NM_+|	32.0517	-4.73862	1.85279	-2.55756	0.010541	0.28376	0	0	0	1.25137	0	9.4007	34.7149	46.5339	131.414	40.0437	31.6783	89.5831	#DIV/0!	9.90551	-Inf	0.398776	-Inf	C11orf30	-	-
chr3:137957213-137957263:mpeak_141212|chr3_137906089_138014700_ARMC8_NM_+|	54.0284	-4.32477	1.99556	-2.16719	0.0302202	0.372039	0	0	0	0	0	10.5067	36.1035	53.937	228.815	72.5792	86.5873	159.812	#DIV/0!	9.88154	-Inf	-0.000555418	-Inf	ARMC8	-	-
chr17:29666384-29666434:mpeak_85177|chr17_29421944_29701030_NF1_NM_+|	30.3512	-3.26086	1.59276	-2.0473	0.0406282	0.418328	0	2.11518	0	1.25137	3.16783	11.0596	55.5439	38.0732	95.855	25.0273	35.9021	96.2189	3.34906	9.84983	-2.87145	0.269858	-3.14131	NF1	-	-
chr4:36079665-36079721:mpeak_148144|chr4_36069900_36245979_ARAP2_NM_-|	29.1443	-4.40195	1.7563	-2.50637	0.0121978	0.289971	0	0	0	1.25137	0	9.95368	45.8237	34.9004	86.5787	72.5792	53.8531	44.7916	#DIV/0!	9.81614	-Inf	-0.0334223	-Inf	ARAP2	-	-
chr2:179990659-179990709:mpeak_115753|chr2_179974755_180129350_SESTD1_NM_-|	42.0429	-3.73998	1.81034	-2.0659	0.0388382	0.410874	0	0	0	0	0	9.4007	54.1553	51.8218	101.266	70.0765	83.4195	134.375	#DIV/0!	9.79679	-Inf	-0.474096	-Inf	SESTD1	-	-
chr18:44675115-44675179:mpeak_94625|chr18_44635156_44676871_HDHD2_NM_-|	70.3341	-1.79549	0.79957	-2.24558	0.0247312	0.346463	4.16579	5.28794	3.0921	16.2678	5.27971	13.8246	140.248	149.12	145.329	135.148	115.098	111.149	2.88611	9.78764	-1.4954	0.266434	-1.76184	HDHD2	-	-
chr9:91612983-91613083:mpeak_204983|chr9_91606323_91615968_S1PR3_NM_+|	31.5942	-3.36824	1.59387	-2.11325	0.0345793	0.390339	1.3886	0	0	10.0109	4.22377	8.84772	37.4921	14.8062	65.707	100.109	35.9021	100.643	3.53017	9.75365	-4.05509	-1.00393	-3.05117	S1PR3	-	-
chr4:119711244-119711294:mpeak_153435|chr4_119644810_119757326_SEC24D_NM_-|	48.3475	-4.25924	1.85306	-2.29849	0.0215337	0.329815	0	0	0	0	0	8.84772	74.9842	60.2825	163.881	71.3279	55.965	144.881	#DIV/0!	9.75227	-Inf	0.136328	-Inf	SEC24D	-	-
chr1:93916087-93916137:mpeak_7451|chr1_93913687_94016503_FNBP1L_NM_+|	49.1582	-4.01739	1.82802	-2.19767	0.0279724	0.363459	0	0	0	0	0	10.5067	81.9272	66.6281	107.45	65.071	91.867	166.448	#DIV/0!	9.74687	-Inf	-0.337081	-Inf	FNBP1L	-	-
chr16:25013817-25013867:mpeak_76926|chr16_24931581_25026699_ARHGAP17_NM_-|	38.0795	-3.67249	1.54909	-2.37074	0.0177527	0.312027	1.3886	0	0	0	9.50349	4.97684	58.3211	67.6857	90.4438	78.8361	50.6853	95.1129	1.92459	9.66927	-3.38239	-0.0535407	-3.32885	ARHGAP17	-	-
chr10:114207356-114207552:mpeak_29529|chr10_114206755_114575048_VTI1A_NM_+|	61.6976	-1.83008	0.927028	-1.97413	0.0483668	0.450068	0	4.23035	4.63814	10.0109	6.33566	17.6954	134.694	103.644	106.677	145.158	83.4195	123.868	3.8557	9.65879	-1.94055	-0.0307437	-1.90981	VTI1A	-	-
chr14:20786794-20786846:mpeak_58895|chr14_20779911_20801471_CCNB1IP1_NM_-|	49.5856	-4.22364	1.80124	-2.34485	0.0190347	0.315087	0	0	0	0	0	9.4007	91.6474	69.8008	132.187	103.863	55.965	132.163	#DIV/0!	9.65855	-Inf	0.00810105	-Inf	CCNB1IP1	-	-
chr12:112724059-112724109:mpeak_51097|chr12_112600327_112819896_HECTD4_NM_-|	48.2591	-4.32362	1.83193	-2.36014	0.0182678	0.313389	0	0	0	0	0	8.29473	70.8184	72.9736	169.292	52.5574	69.6922	135.481	#DIV/0!	9.65513	-Inf	0.280689	-Inf	HECTD4	-	-
chr16:11150266-11150316:mpeak_75373|chr16_11038344_11272191_CLEC16A_NM_+|	41.5181	-3.93568	1.66932	-2.35766	0.0183907	0.313394	0	1.05759	0	0	2.11189	13.2716	74.9842	53.937	113.635	78.8361	81.3076	79.0765	1.30806	9.64601	-3.86253	0.0199777	-3.88251	CLEC16A	-	-
chrX:20250753-20250803:mpeak_211091|chrX_20173638_20284750_RPS6KA3_NM_-|	28.4678	-3.73691	1.75782	-2.12588	0.0335131	0.386256	0	0	0	1.25137	0	12.7186	34.7149	30.6701	44.0624	80.0874	61.2447	76.8645	#DIV/0!	9.60369	-Inf	-0.995392	-Inf	RPS6KA3	-	-
chr21:33054007-33054057:mpeak_126551|chr21_33044667_33104431_SCAF4_NM_-|	51.0839	-4.10092	1.79467	-2.28506	0.0223096	0.334253	0	0	0	0	0	10.5067	109.699	111.047	53.3387	100.109	106.65	121.656	#DIV/0!	9.59759	-Inf	-0.260902	-Inf	SCAF4	-	-
chr2:58458452-58458678:mpeak_107123|chr2_58386935_58468515_FANCL_NM_-|	63.1896	-2.44433	1.10916	-2.20377	0.0275406	0.361447	5.55439	2.11518	0	11.2623	10.5594	10.5067	74.9842	79.3191	226.496	85.0929	100.315	152.07	3.0211	9.57942	-2.07559	0.174239	-2.24982	FANCL	-	-
chrX:14044947-14045031:mpeak_210702|chrX_14027288_14048035_GEMIN8_NM_-|	36.167	-3.90062	1.55033	-2.51599	0.0118698	0.289227	1.3886	0	0	0	5.27971	6.0828	93.036	101.528	48.7005	77.5847	51.7412	48.6624	1.71245	9.57578	-3.03258	0.450746	-3.48333	GEMIN8	-	-
chr12:76942448-76942498:mpeak_48215|chr12_76749801_76953589_OSBPL8_NM_-|	82.5581	-5.18146	1.90745	-2.71643	0.00659903	0.269946	0	0	0	0	0	12.1656	108.311	106.816	381.874	116.377	99.2586	165.895	#DIV/0!	9.5659	-Inf	0.645935	-Inf	OSBPL8	-	-
chr9:86400597-86400647:mpeak_204649|chr9_86354659_86432752_GKAP1_NM_-|	23.2427	-3.83687	1.64559	-2.33161	0.019721	0.318591	0	0	0	0	2.11189	7.74175	27.7719	46.5339	40.1973	43.7978	43.2937	67.4638	#DIV/0!	9.56322	-Inf	-0.432737	-Inf	GKAP1	-	-
chr6:144180665-144180715:mpeak_178662|chr6_144164507_144184553_LTV1_NM_+|	67.4749	-4.52734	1.84939	-2.44802	0.0143644	0.293828	0	0	0	0	0	13.2716	130.528	100.471	148.421	212.732	100.315	103.961	#DIV/0!	9.54772	-Inf	-0.136279	-Inf	LTV1	-	-
chr9:131734996-131735046:mpeak_209120|chr9_131709971_131768780_NUP188_NM_+|	53.3925	-4.28277	1.92588	-2.2238	0.0261618	0.353468	0	0	0	0	0	9.95368	74.9842	50.7642	191.71	82.5902	55.965	174.742	#DIV/0!	9.53121	-Inf	0.0190343	-Inf	NUP188	-	-
chr21:35920290-35920340:mpeak_126844|chr21_35890554_35987441_RCAN1_NM_-|	68.748	-4.32733	1.92929	-2.24297	0.024899	0.347055	0	0	0	0	0	14.9305	141.637	72.9736	123.684	222.743	66.5244	182.484	#DIV/0!	9.49473	-Inf	-0.479749	-Inf	RCAN1	-	-
chr2:233440996-233441046:mpeak_119433|chr2_233415296_233445613_EIF4E2_NM_+|	43.8807	-3.64309	1.79078	-2.03436	0.0419155	0.423726	0	0	0	0	0	9.95368	63.8754	52.8794	84.2596	108.869	71.8041	134.928	#DIV/0!	9.46165	-Inf	-0.650801	-Inf	EIF4E2	-	-
chr2:168977414-168977464:mpeak_114714|chr2_168812080_169104105_STK39_NM_-|	34.5083	-4.39811	1.58695	-2.77143	0.00558101	0.267856	1.3886	0	0	2.50273	1.05594	12.1656	58.3211	68.7432	102.812	58.8142	48.5734	59.7221	1.81219	9.40956	-3.5013	0.460064	-3.96136	STK39	-	-
chr8:99501667-99501717:mpeak_197150|chr8_99468228_99954799_STK3_NM_-|	62.9326	-4.7277	1.7352	-2.72459	0.00643813	0.269946	0	0	0	0	0	9.95368	133.305	126.911	166.2	108.869	85.5314	124.421	#DIV/0!	9.36608	-Inf	0.419514	-Inf	STK3	-	-
chr9:99090756-99090806:mpeak_205827|chr9_99077181_99145992_SLC35D2_NR_-mpeak_205827|chr9_99083623_99145992_SLC35D2_NM_-||	57.3444	-4.42473	1.99095	-2.22242	0.026255	0.354231	0	0	0	0	0	9.95368	37.4921	78.2615	243.503	83.8415	57.0209	178.06	#DIV/0!	9.3631	-Inf	0.171806	-Inf	SLC35D2	-	-
chr16:74952674-74952724:mpeak_80221|chr16_74908342_75019017_WDR59_NM_-|	63.1121	-4.67817	1.9844	-2.35747	0.0183999	0.313394	0	0	0	0	0	9.95368	74.9842	66.6281	286.792	68.8251	53.8531	196.309	#DIV/0!	9.36121	-Inf	0.425475	-Inf	WDR59	-	-
chr9:139816656-139816706:mpeak_210014|chr9_139780964_139820134_TRAF2_NM_+|	53.4175	-4.15603	1.839	-2.25994	0.0238252	0.342057	0	0	0	0	0	10.5067	127.751	111.047	54.8847	156.421	114.042	66.3579	#DIV/0!	9.3581	-Inf	-0.197723	-Inf	TRAF2	-	-
chr12:124163278-124163328:mpeak_52654|chr12_124155659_124192150_TCTN2_NM_+|	17.797	-3.86987	1.58143	-2.44708	0.0144019	0.293828	0	0	0	1.25137	4.22377	5.52982	18.0518	35.958	30.921	37.541	25.3426	54.7452	#DIV/0!	9.35566	-Inf	-0.469884	-Inf	TCTN2	-	-
chr2:171976102-171976152:mpeak_115056|chr2_171850466_172087824_TLK1_NM_-|	76.7892	-4.91096	1.7792	-2.7602	0.00577657	0.267856	0	0	0	0	0	12.7186	158.3	160.753	180.888	156.421	123.545	128.845	#DIV/0!	9.33336	-Inf	0.290324	-Inf	TLK1	-	-
chr7:17367996-17368062:mpeak_182179|chr7_17338275_17382544_AHR_NM_+|	32.2046	-3.88932	1.68379	-2.30986	0.0208961	0.327284	0	1.05759	0	12.5137	2.11189	2.21193	31.9377	51.8218	104.358	43.7978	33.7902	102.855	1.68658	9.3312	-3.99283	0.0600957	-4.05292	AHR	-	-
chr17:44154084-44154254:mpeak_86883|chr17_44109069_44302740_KANSL1_NM_-|	49.8295	-4.14313	1.77356	-2.33604	0.0194889	0.317164	0	0	0	0	0	9.4007	73.5956	103.644	108.996	66.3224	96.0908	139.905	#DIV/0!	9.32863	-Inf	-0.078862	-Inf	KANSL1	-	-
chr2:242660719-242660800:mpeak_120177|chr2_242641455_242664403_ING5_NM_+|	30.584	-4.01155	1.46867	-2.73143	0.00630606	0.268895	1.3886	0	0	6.25683	4.22377	3.87088	52.7667	63.4553	81.1675	72.5792	46.4615	34.8379	2.11044	9.32649	-3.3695	0.359253	-3.72875	ING5	-	-
chr10:126476627-126476795:mpeak_30658|chr10_126449072_126480510_METTL10_NM_-|	41.9732	-3.17515	1.38372	-2.29465	0.0217534	0.331202	1.3886	0	1.54605	5.00546	1.05594	13.2716	63.8754	50.7642	159.243	82.5902	59.1328	65.8049	1.60725	9.31585	-2.71981	0.400253	-3.12006	METTL10	-	-
chr1:100749713-100749763:mpeak_7876|chr1_100731713_100756958_RTCA_NM_+|	58.5608	-4.49678	1.78762	-2.51552	0.0118858	0.289377	0	0	0	0	0	9.95368	102.756	84.6071	183.207	116.377	79.1957	126.633	#DIV/0!	9.2677	-Inf	0.201764	-Inf	RTCA	-	-
chr1:93927333-93927383:mpeak_7455|chr1_93913687_94016503_FNBP1L_NM_+|	49.1121	-3.94878	1.81568	-2.17482	0.0296438	0.369152	0	0	0	0	0	9.95368	81.9272	66.6281	107.45	65.071	91.867	166.448	#DIV/0!	9.23388	-Inf	-0.337081	-Inf	FNBP1L	-	-
chr1:93942606-93942656:mpeak_7458|chr1_93913687_94016503_FNBP1L_NM_+|	49.1121	-3.94878	1.81568	-2.17482	0.0296438	0.369152	0	0	0	0	0	9.95368	81.9272	66.6281	107.45	65.071	91.867	166.448	#DIV/0!	9.23388	-Inf	-0.337081	-Inf	FNBP1L	-	-
chr22:50262181-50262304:mpeak_131395|chr22_50247496_50276981_ZBED4_NM_+|	104.682	-2.06454	0.840878	-2.45522	0.0140799	0.293546	6.94298	9.5183	3.0921	7.5082	8.44754	18.2484	249.947	229.497	351.726	108.869	99.2586	163.13	2.35251	9.21306	-0.806754	1.16272	-1.96948	ZBED4	-	-
chr18:47499325-47499436:mpeak_94811|chr18_47352993_47721451_MYO5B_NM_-|	37.8093	-2.25551	1.09349	-2.06267	0.0391443	0.412293	2.77719	2.11518	0	2.50273	9.50349	7.74175	63.8754	88.8374	61.8419	60.0656	78.1398	76.3116	3.42036	9.20579	-2.0131	0.000254849	-2.01335	MYO5B	-	-
chr10:114899682-114899732:mpeak_29656|chr10_114710008_114925313_TCF7L2_NM_+|	55.4528	-4.5402	1.88474	-2.40892	0.0159998	0.301916	0	0	0	0	0	8.29473	69.4298	76.1464	240.41	63.8197	59.1328	148.199	#DIV/0!	9.17722	-Inf	0.509451	-Inf	TCF7L2	-	-
chr5:111703103-111703361:mpeak_163674|chr5_111500815_111755010_EPB41L4A_NM_-|	29.5262	-3.08664	1.50581	-2.04982	0.0403817	0.417238	1.3886	0	0	0	6.33566	5.52982	48.6009	54.9946	43.2893	55.0601	63.3566	75.7586	2.83609	9.16606	-3.09507	-0.402674	-2.6924	EPB41L4A	-	-
chr10:126490941-126490991:mpeak_30660|chr10_126490353_126523070_FAM175B_NM_+|	31.4557	-3.42873	1.61684	-2.12064	0.0339525	0.387244	1.3886	0	0	3.7541	0	7.18877	51.3781	39.1308	94.3089	61.3169	44.3496	74.6526	2.254	9.10292	-2.97829	0.035551	-3.01384	FAM175B	-	-
chr21:37786767-37786817:mpeak_126990|chr21_37757688_37788572_CHAF1B_NM_+|	24.2574	-3.88216	1.85876	-2.08857	0.036746	0.400524	0	0	0	0	1.05594	8.29473	24.9947	27.4973	74.2103	36.2896	26.3986	92.348	#DIV/0!	9.04693	-Inf	-0.291162	-Inf	CHAF1B	-	-
chr22:29299471-29299521:mpeak_129339|chr22_29279754_29449566_ZNRF3_NM_+mpeak_129339|chr22_29279754_29449566_ZNRF3_NM_+||	68.8107	-5.88057	1.99397	-2.94917	0.00318629	0.267856	0	0	0	1.25137	0	15.4835	47.2123	84.6071	399.653	90.0984	47.5174	139.905	#DIV/0!	9.04521	-Inf	0.937403	-Inf	ZNRF3	-	-
chr3:5251327-5251377:mpeak_131711|chr3_5229358_5257513_EDEM1_NM_+|	39.163	-4.07918	1.84577	-2.21001	0.0271044	0.359065	0	1.05759	0	0	1.05594	9.4007	49.9895	48.6491	186.299	43.7978	28.5105	101.196	1.1135	9.04011	-3.30557	0.715676	-4.02124	EDEM1	-	-
chr16:68359857-68359924:mpeak_79131|chr16_68344876_68390956_PRMT7_NM_+|	29.6517	-3.39477	1.60379	-2.11671	0.0342842	0.388352	0	2.11518	0	1.25137	1.05594	8.84772	122.196	61.3401	35.5591	62.5683	33.7902	27.0961	2.89624	9.03573	-2.39884	0.827581	-3.22642	PRMT7	-	-
chr3:141818743-141818793:mpeak_141648|chr3_141671538_141868386_TFDP2_NM_-|	52.6131	-4.31957	1.72424	-2.5052	0.0122381	0.29001	0	0	0	0	0	8.84772	93.036	90.9526	144.555	91.3497	100.315	102.302	#DIV/0!	9.02933	-Inf	0.160438	-Inf	TFDP2	-	-
chr3:141107054-141107104:mpeak_141485|chr3_141043054_141161230_ZBTB38_NM_+|	69.6875	-3.9258	1.74012	-2.25605	0.0240678	0.34276	0	1.05759	0	0	0	9.95368	156.911	119.507	217.993	145.158	72.8601	112.808	0.641725	9.02618	-3.23445	0.579636	-3.81409	ZBTB38	-	-
chr11:33356477-33356674:mpeak_33480|chr11_33278217_33374637_HIPK3_NM_+|	101.324	-2.92738	1.16743	-2.50755	0.0121572	0.289971	4.16579	6.34553	0	17.5191	6.33566	3.87088	223.564	211.518	435.213	120.131	51.7412	135.481	1.81168	9.02079	-1.39928	1.50161	-2.90088	HIPK3	-	-
chr5:14238793-14238843:mpeak_157752|chr5_14143828_14507988_TRIO_NM_+|	53.2116	-4.14325	1.76698	-2.34482	0.0190361	0.315087	0	0	0	0	0	9.95368	91.6474	95.183	110.542	102.612	77.0838	151.517	#DIV/0!	9.01566	-Inf	-0.155487	-Inf	TRIO	-	-
chr14:50299423-50299479:mpeak_60803|chr14_50251431_50319791_NEMF_NM_-|	41.0567	-4.7079	1.78075	-2.64378	0.00819866	0.273277	0	0	0	0	1.05594	13.8246	45.8237	67.6857	115.954	97.6065	74.9719	75.7586	#DIV/0!	8.98809	-Inf	-0.114038	-Inf	NEMF	-	-
chr17:12757691-12757741:mpeak_83372|chr17_12692828_12893348_ARHGAP44_NM_+|	45.0301	-3.82167	1.76343	-2.16718	0.0302211	0.372039	0	0	0	0	0	8.84772	65.264	100.471	70.3452	87.5956	71.8041	136.034	#DIV/0!	8.98448	-Inf	-0.323556	-Inf	ARHGAP44	-	-
chr21:32647912-32647962:mpeak_126493|chr21_32493155_32931290_TIAM1_NM_-|	47.0391	-3.915	1.70017	-2.30271	0.0212954	0.329134	1.3886	0	0	0	3.16783	13.8246	91.6474	62.3977	108.223	63.8197	60.1887	159.812	1.58837	8.98053	-3.61319	-0.113933	-3.49926	TIAM1	-	-
chr6:147632441-147632491:mpeak_178864|chr6_147525493_147705849_STXBP5_NM_+|	50.407	-3.91733	1.88169	-2.08182	0.037359	0.403457	0	0	0	0	0	9.95368	59.7096	64.5129	136.825	77.5847	64.4125	191.885	#DIV/0!	8.94359	-Inf	-0.355025	-Inf	STXBP5	-	-
chr5:60693652-60693702:mpeak_159871|chr5_60628099_60839281_ZSWIM6_NM_+|	56.4058	-3.57804	1.77193	-2.01929	0.0434568	0.430714	0	1.05759	0	0	0	8.29473	105.533	90.9526	192.483	73.8306	55.965	148.752	0.815686	8.93355	-2.97142	0.48173	-3.45315	ZSWIM6	-	-
chr11:62303946-62304092:mpeak_35055|chr11_62201363_62314332_AHNAK_NM_-|	47.347	-2.84314	1.35521	-2.09794	0.0359108	0.395721	0	3.17277	0	5.00546	4.22377	17.1424	108.311	101.528	31.694	113.874	101.371	81.8414	3.94078	8.87678	-3.05518	-0.298661	-2.75652	AHNAK	-	-
chr3:195105782-195105832:mpeak_145636|chr3_195000157_195163817_ACAP2_NM_-|	58.1631	-4.43749	1.79767	-2.46847	0.0135693	0.293236	0	0	0	0	0	9.4007	95.8132	81.4343	193.256	111.372	72.8601	133.822	#DIV/0!	8.8671	-Inf	0.220218	-Inf	ACAP2	-	-
chr3:64059004-64059065:mpeak_136606|chr3_64053639_64082598_PRICKLE2-AS1_NR_+|	47.2988	-4.13793	1.45676	-2.8405	0.00450427	0.267856	1.3886	0	0	3.7541	8.44754	16.5895	48.6009	75.0888	88.1247	102.612	114.042	108.938	1.96672	8.84271	-4.37392	-0.620262	-3.75366	PRICKLE2-AS1	-	-
chr14:73464246-73464296:mpeak_63709|chr14_73437822_73493920_ZFYVE1_NM_-|	29.5144	-4.2876	1.8034	-2.37751	0.0174301	0.309775	0	0	0	1.25137	0	8.84772	37.4921	48.6491	86.5787	52.5574	25.3426	93.454	#DIV/0!	8.84054	-Inf	0.0114541	-Inf	ZFYVE1	-	-
chr4:148666028-148666078:mpeak_155091|chr4_148653452_148993143_ARHGAP10_NM_+|	28.1076	-4.10476	1.66955	-2.4586	0.0139481	0.293546	0	0	0	0	2.11189	8.29473	27.7719	58.1674	64.161	42.5464	61.2447	72.9937	#DIV/0!	8.82991	-Inf	-0.236067	-Inf	ARHGAP10	-	-
chr2:122176997-122177047:mpeak_111521|chr2_122098523_122407052_CLASP1_NM_-|	92.2512	-3.8821	1.96779	-1.97282	0.0485161	0.450593	0	1.05759	0	0	0	16.5895	95.8132	100.471	329.308	115.126	124.601	324.048	0.603655	8.82771	-3.97142	-0.101174	-3.87024	CLASP1	-	-
chr1:226553649-226553699:mpeak_19390|chr1_226549242_226595801_PARP1_NM_-|	100.265	-5.15433	2.07568	-2.4832	0.0130206	0.29152	0	0	0	0	0	15.4835	94.4246	85.6647	478.502	155.169	79.1957	294.74	#DIV/0!	8.77908	-Inf	0.31583	-Inf	PARP1	-	-
chr2:32618240-32618517:mpeak_105139|chr2_32582095_32842791_BIRC6_NM_+|	44.3366	-4.29442	1.62332	-2.64545	0.0081582	0.273277	0	1.05759	0	5.00546	6.33566	11.6126	44.4351	39.1308	161.562	76.3333	42.2377	144.328	1.29433	8.731	-4.43988	-0.100976	-4.3389	BIRC6	-	-
chr17:55369623-55369673:mpeak_87834|chr17_55333930_55756909_MSI2_NM_+|	31.9858	-3.43467	1.43566	-2.3924	0.0167388	0.306655	0	2.11518	0	3.7541	1.05594	6.63579	106.922	71.916	60.2959	65.071	29.5664	36.4968	2.65355	8.72833	-2.43597	0.866773	-3.30275	MSI2	-	-
chr6:47448737-47448787:mpeak_173350|chr6_47445524_47591921_CD2AP_NM_+|	58.8647	-2.38024	1.02895	-2.31327	0.020708	0.32571	0	1.05759	3.86512	6.25683	8.44754	14.9305	94.4246	87.7798	149.194	101.361	89.7551	149.305	2.22816	8.70537	-2.58977	-0.038755	-2.55102	CD2AP	-	-
chr1:176074372-176074422:mpeak_15371|chr1_175914306_176176380_RFWD2_NM_-|	48.88	-4.055	1.89249	-2.14268	0.0321384	0.380814	0	0	0	0	0	8.29473	55.5439	49.7067	186.299	91.3497	54.909	140.457	#DIV/0!	8.67903	-Inf	0.0241163	-Inf	RFWD2	-	-
chr15:91315183-91315240:mpeak_73310|chr15_91260557_91358331_BLM_NM_+|	23.9832	-2.87445	1.45859	-1.9707	0.0487579	0.451165	0	1.05759	0	2.50273	7.3916	5.52982	38.8807	30.6701	23.9637	62.5683	53.8531	61.381	3.39281	8.67488	-3.86634	-0.927013	-2.93933	BLM	-	-
chr9:126554428-126554479:mpeak_208272|chr9_126144904_126692417_DENND1A_NM_-|	27.3065	-2.49503	1.25763	-1.98392	0.0472649	0.444921	2.77719	1.05759	0	2.50273	1.05594	7.18877	61.0982	58.1674	69.5722	40.0437	43.2937	40.9207	3.04609	8.64929	-1.48678	0.603808	-2.09059	DENND1A	-	-
chr3:27502090-27502210:mpeak_133494|chr3_27418336_27525911_SLC4A7_NM_-|	79.5633	-3.74995	1.86358	-2.01223	0.0441961	0.433229	0	1.05759	0	0	0	13.2716	105.533	117.392	255.871	111.372	100.315	249.948	0.662654	8.62474	-3.64949	0.052663	-3.70215	SLC4A7	-	-
chr4:85719067-85719129:mpeak_151026|chr4_85594144_85887544_WDFY3_NM_-|	57.2971	-2.4923	1.13666	-2.19266	0.028332	0.364328	0	4.23035	1.54605	2.50273	4.22377	18.2484	141.637	102.586	122.911	93.8524	91.867	103.961	2.36007	8.62155	-2.11224	0.341845	-2.45408	WDFY3	-	-
chr2:234457743-234457799:mpeak_119540|chr2_234386149_234474236_USP40_NM_-|	65.0061	-3.40731	1.06515	-3.19889	0.00137957	0.267856	2.77719	1.05759	0	8.75956	11.6154	10.5067	123.585	124.795	137.598	112.623	102.426	144.328	1.49028	8.59307	-3.00953	0.10302	-3.11255	USP40	-	-
chr4:85621175-85621287:mpeak_151004|chr4_85594144_85887544_WDFY3_NM_-|	55.5138	-3.47427	1.66334	-2.08874	0.0367315	0.400464	0	1.05759	0	0	0	8.29473	141.637	102.586	122.911	93.8524	91.867	103.961	0.864199	8.59023	-2.97142	0.341845	-3.31326	WDFY3	-	-
chr2:169071436-169071486:mpeak_114730|chr2_168812080_169104105_STK39_NM_-|	34.2744	-5.164	1.46971	-3.51361	0.000442059	0.267856	0	0	0	5.00546	2.11189	7.18877	58.3211	68.7432	102.812	58.8142	48.5734	59.7221	#DIV/0!	8.56092	-Inf	0.460064	-Inf	STK39	-	-
chr19:34767374-34767424:mpeak_99047|chr19_34745455_34843551_KIAA0355_NM_+|	28.9863	-3.80697	1.65461	-2.30083	0.0214011	0.329293	1.3886	0	0	1.25137	3.16783	9.4007	31.9377	42.3035	96.628	40.0437	33.7902	87.9242	2.438	8.54356	-3.31505	0.0790553	-3.3941	KIAA0355	-	-
chr8:19197956-19198006:mpeak_192344|chr8_19171080_19252060_SH2D4A_NM_+|	51.4552	-3.86633	1.73751	-2.22521	0.026067	0.353372	0	0	0	0	0	9.95368	77.7614	87.7798	91.9899	113.874	128.825	107.279	#DIV/0!	8.53227	-Inf	-0.442517	-Inf	SH2D4A	-	-
chr7:39994323-39994373:mpeak_183424|chr7_39989958_40133728_CDK13_NM_+|	57.2996	-4.34405	1.85099	-2.34687	0.0189317	0.315087	0	0	0	0	0	8.84772	84.7044	68.7432	211.809	73.8306	77.0838	162.577	#DIV/0!	8.46695	-Inf	0.220484	-Inf	CDK13	-	-
chr13:96854178-96854228:mpeak_57819|chr13_96743092_97484743_HS6ST3_NM_+|	49.2834	-5.07146	1.7364	-2.92068	0.00349269	0.267856	0	0	0	0	1.05594	13.8246	86.093	88.8374	137.598	92.6011	70.7482	100.643	#DIV/0!	8.45508	-Inf	0.243494	-Inf	HS6ST3	-	-
chr7:122297619-122297669:mpeak_188485|chr7_121960392_122526813_CADPS2_NM_-|	54.9402	-4.32525	1.80244	-2.39967	0.01641	0.305401	0	0	0	0	0	8.29473	87.4816	74.0312	194.802	77.5847	74.9719	142.116	#DIV/0!	8.44468	-Inf	0.274037	-Inf	CADPS2	-	-
chr6:111737043-111737093:mpeak_176603|chr6_111621359_111804918_REV3L_NM_-|	30.5149	-3.07644	1.49233	-2.0615	0.0392557	0.412293	0	2.11518	0	2.50273	2.11189	8.84772	33.3263	48.6491	108.996	67.5738	41.1818	50.8744	3.32276	8.43347	-2.67008	0.258628	-2.92871	REV3L	-	-
chr1:53456591-53456641:mpeak_5354|chr1_53392900_53516280_SCP2_NM_+|	70.4036	-5.52288	2.03419	-2.71503	0.006627	0.269946	0	0	0	0	2.11189	18.8014	40.2693	62.3977	348.634	57.5628	72.8601	242.206	#DIV/0!	8.41854	-Inf	0.276349	-Inf	SCP2	-	-
chr20:3597902-3597985:mpeak_120563|chr20_3451664_3627369_ATRN_NM_+|	34.7424	-2.76285	1.36996	-2.01673	0.0437233	0.432139	0	3.17277	0	2.50273	4.22377	6.63579	52.7667	51.8218	136.825	36.2896	36.958	85.7122	3.94273	8.40608	-2.07435	0.602845	-2.6772	ATRN	-	-
chr8:110342745-110342795:mpeak_198406|chr8_110255530_110346350_NUDCD1_NM_-|	56.554	-4.07714	1.92602	-2.11687	0.0342709	0.388352	0	0	0	0	0	9.95368	70.8184	48.6491	193.256	85.0929	71.8041	199.074	#DIV/0!	8.38863	-Inf	-0.186871	-Inf	NUDCD1	-	-
chr2:166607162-166607212:mpeak_114633|chr2_166605413_166650803_GALNT3_NM_-|	45.5054	-5.09489	2.02713	-2.51335	0.0119592	0.289771	0	0	0	0	1.05594	10.5067	40.2693	47.5915	239.637	38.7923	21.1189	147.093	#DIV/0!	8.37852	-Inf	0.661825	-Inf	GALNT3	-	-
chr8:129023773-129023823:mpeak_200097|chr8_128902873_129113225_PVT1_NR_+|	45.294	-3.00167	1.43632	-2.08983	0.0366333	0.399758	1.3886	1.05759	0	0	3.16783	11.0596	95.8132	102.586	73.4373	87.5956	84.4754	82.9473	1.34981	8.3685	-2.54007	0.092138	-2.63221	PVT1	-	-
chr11:28187856-28187906:mpeak_33174|chr11_28129797_28351942_METTL15_NM_+|	52.4537	-3.85848	1.73712	-2.2212	0.0263374	0.354807	0	0	0	0	0	9.95368	80.5386	96.2405	85.0326	133.896	108.762	115.02	#DIV/0!	8.34857	-Inf	-0.450134	-Inf	METTL15	-	-
chr6:111800896-111800955:mpeak_176620|chr6_111621359_111804918_REV3L_NM_-|	30.4143	-3.88267	1.53899	-2.52287	0.0116401	0.288136	0	1.05759	0	2.50273	5.27971	5.52982	33.3263	48.6491	108.996	67.5738	41.1818	50.8744	1.66138	8.33946	-3.65391	0.258628	-3.91253	REV3L	-	-
chr14:52122916-52123018:mpeak_61092|chr14_51955838_52194462_FRMD6_NM_+|	51.2802	-3.85871	1.88484	-2.04723	0.0406356	0.418328	0	0	0	0	0	9.4007	68.0412	49.7067	149.967	68.8251	79.1957	190.226	#DIV/0!	8.33773	-Inf	-0.33738	-Inf	FRMD6	-	-
chr19:12132494-12132545:mpeak_97191|chr19_12127481_12146556_ZNF433_NM_-|	32.8671	-2.85976	1.20043	-2.38228	0.0172056	0.308962	1.3886	2.11518	0	1.25137	3.16783	6.63579	84.7044	83.5495	78.8485	42.5464	45.4055	44.7916	2.12692	8.32807	-1.65772	0.896467	-2.55418	ZNF433	-	-
chr7:135144200-135144316:mpeak_189588|chr7_135047938_135194875_CNOT4_NM_-|	40.5437	-3.37947	1.48887	-2.26982	0.0232186	0.339233	2.77719	0	0	3.7541	5.27971	7.74175	43.0465	59.225	163.108	47.5519	40.1258	113.914	3.1395	8.32154	-2.59466	0.396618	-2.99128	CNOT4	-	-
chr8:66679770-66679821:mpeak_194751|chr8_66631730_66753969_PDE7A_NM_-|	31.3611	-4.12927	1.55824	-2.64997	0.00804997	0.273277	0	0	0	0	5.27971	5.52982	51.3781	47.5915	71.1182	42.5464	64.4125	88.4772	#DIV/0!	8.29647	-Inf	-0.200418	-Inf	PDE7A	-	-
chr14:96530516-96530584:mpeak_65594|chr14_96505660_96552847_C14orf132_NM_+|	56.0174	-4.03796	1.79316	-2.25187	0.0243303	0.344589	0	0	0	0	0	9.95368	154.134	72.9736	74.9833	151.415	99.2586	109.49	#DIV/0!	8.29095	-Inf	-0.253672	-Inf	C14orf132	-	-
chr6:47540369-47540419:mpeak_173374|chr6_47445524_47591921_CD2AP_NM_+|	56.7683	-4.18831	1.75801	-2.38241	0.0171997	0.308962	0	0	0	0	0	9.4007	94.4246	87.7798	149.194	101.361	89.7551	149.305	#DIV/0!	8.28448	-Inf	-0.038755	-Inf	CD2AP	-	-
chr3:27464947-27464997:mpeak_133474|chr3_27418336_27525911_SLC4A7_NM_-|	79.4291	-4.64954	1.8923	-2.45708	0.0140071	0.293546	0	0	0	0	0	12.7186	105.533	117.392	255.871	111.372	100.315	249.948	#DIV/0!	8.26537	-Inf	0.052663	-Inf	SLC4A7	-	-
chr8:15486772-15486928:mpeak_191990|chr8_15397595_15621711_TUSC3_NM_+|	74.4625	-2.72101	1.20072	-2.26615	0.0234422	0.340492	4.16579	1.05759	0	8.75956	10.5594	22.1193	73.5956	75.0888	195.575	141.404	114.042	247.183	2.27592	8.2443	-2.98791	-0.545998	-2.44191	TUSC3	-	-
chr1:109291920-109291981:mpeak_8651|chr1_109289284_109351404_STXBP3_NM_+|	27.9327	-3.40365	1.72312	-1.97528	0.0482359	0.449788	1.3886	0	0	1.25137	6.33566	7.18877	19.4404	28.5549	91.2168	48.8033	24.2867	106.726	2.99241	8.21719	-3.41154	-0.369233	-3.0423	STXBP3	-	-
chr10:103758117-103758167:mpeak_28900|chr10_103607377_103815932_C10orf76_NM_-|	55.5965	-4.2163	1.70995	-2.46574	0.0136731	0.293236	0	0	0	0	0	8.84772	109.699	102.586	122.911	127.639	87.6433	107.832	#DIV/0!	8.21479	-Inf	0.0529612	-Inf	C10orf76	-	-
chr1:12406818-12406868:mpeak_1133|chr1_12290095_12568946_VPS13D_NM_+|	60.6203	-4.13593	1.85065	-2.23485	0.0254275	0.350275	0	0	0	0	0	10.5067	70.8184	90.9526	170.065	81.3388	101.371	202.392	#DIV/0!	8.18487	-Inf	-0.214764	-Inf	VPS13D	-	-
chr12:63143892-63144003:mpeak_46822|chr12_63042416_63328665_PPM1H_NM_-|	61.8327	-3.34424	1.63615	-2.04396	0.0409573	0.419756	1.3886	1.05759	0	3.7541	0	14.9305	80.5386	75.0888	222.631	83.8415	70.7482	188.014	0.970045	8.18057	-2.93325	0.142831	-3.07608	PPM1H	-	-
chr10:43605149-43605199:mpeak_24356|chr10_43572516_43623559_RET_NM_+|	41.3953	-3.24887	1.60415	-2.02529	0.0428375	0.428566	0	2.11518	0	1.25137	0	7.74175	76.3728	65.5705	178.569	52.5574	40.1258	72.4407	1.97981	8.16943	-2.08804	0.956829	-3.04487	RET	-	-
chr3:17500665-17500715:mpeak_132978|chr3_17202748_17782399_TBC1D5_NM_-|	72.7945	-4.58226	1.85563	-2.46938	0.0135348	0.293236	0	0	0	0	0	11.0596	86.093	118.45	251.233	108.869	98.2027	199.627	#DIV/0!	8.15812	-Inf	0.164366	-Inf	TBC1D5	-	-
chr1:10164277-10164327:mpeak_860|chr1_10093040_10239952_UBE4B_NM_+|	54.9648	-4.22597	1.78151	-2.37213	0.0176858	0.311459	0	0	0	0	0	8.29473	81.9272	103.644	159.243	70.0765	76.0279	160.365	#DIV/0!	8.11964	-Inf	0.170075	-Inf	UBE4B	-	-
chr7:42049662-42049713:mpeak_183504|chr7_42006239_42276618_GLI3_NM_-|	27.7932	-3.73571	1.8378	-2.03271	0.0420821	0.424693	0	0	0	0	2.11189	8.29473	20.8289	35.958	73.4373	26.2787	43.2937	123.315	#DIV/0!	8.09277	-Inf	-0.566761	-Inf	GLI3	-	-
chr11:27400696-27400747:mpeak_33090|chr11_27390690_27494334_LGR4_NM_-|	34.6402	-3.36166	1.57113	-2.13965	0.0323832	0.380944	1.3886	0	0.773024	2.50273	2.11189	7.74175	38.8807	38.0732	170.065	33.7869	39.0699	81.2884	1.31262	8.01606	-2.51507	0.680333	-3.1954	LGR4	-	-
chr16:1255593-1255648:mpeak_74211|chr16_1203240_1269980_CACNA1H_NM_+|	101.474	-3.53548	1.00231	-3.52732	0.000419787	0.267856	1.3886	4.23035	0	10.0109	6.33566	19.3544	236.061	264.397	230.361	158.923	147.832	138.799	1.15328	8.01271	-2.66759	0.713915	-3.38151	CACNA1H	-	-
chr3:24185148-24185202:mpeak_133307|chr3_24164616_24536313_THRB_NM_-|	31.6694	-2.79901	1.39852	-2.0014	0.0453489	0.437019	2.77719	0	0	5.00546	1.05594	8.84772	55.5439	45.4763	74.9833	63.8197	51.7412	70.7817	4.73376	8.00092	-2.4245	-0.0823534	-2.34214	THRB	-	-
chr17:76732280-76732331:mpeak_91545|chr17_76672251_76778424_CYTH1_NM_-|	46.3371	-3.19897	1.58534	-2.01784	0.0436077	0.431696	1.3886	1.05759	0	1.25137	4.22377	18.2484	51.3781	46.5339	135.279	65.071	60.1887	171.424	1.57351	7.99623	-3.27771	-0.347415	-2.9303	CYTH1	-	-
chr2:71612888-71612937:mpeak_108339|chr2_71558884_71661871_ZNF638_NM_+|	61.1187	-4.39792	1.73458	-2.53543	0.0112308	0.287912	0	0	0	0	0	8.84772	97.2018	115.277	180.115	122.634	86.5873	122.762	#DIV/0!	7.99533	-Inf	0.241926	-Inf	ZNF638	-	-
chr12:113695912-113695973:mpeak_51228|chr12_113659242_113733764_TPCN1_NM_+|	68.5374	-4.60945	1.75246	-2.63027	0.00853171	0.273381	0	0	0	0	0	9.4007	188.849	177.675	93.5359	92.6011	141.496	118.891	#DIV/0!	7.98952	-Inf	0.3822	-Inf	TPCN1	-	-
chr5:68393720-68393777:mpeak_160525|chr5_68389775_68425273_SLC30A5_NM_+|	32.2418	-4.57436	1.82405	-2.5078	0.0121485	0.289971	0	0	0	2.50273	8.44754	4.97684	26.3833	24.3245	120.592	36.2896	17.951	145.434	#DIV/0!	7.97652	-Inf	-0.221132	-Inf	SLC30A5	-	-
chr3:182685281-182685334:mpeak_144718|chr3_182662961_182703741_DCUN1D1_NM_-|	62.949	-4.54528	1.71284	-2.65365	0.0079627	0.273277	0	1.05759	0	0	5.27971	9.4007	83.3158	74.0312	306.118	85.0929	51.7412	139.352	0.684576	7.97312	-3.79504	0.746821	-4.54186	DCUN1D1	-	-
chr15:60757571-60757621:mpeak_69895|chr15_60715961_60771359_ICE2_NM_-|	42.8997	-4.69505	1.71996	-2.72974	0.00633836	0.268895	0	0	0	0	1.05594	12.1656	72.207	89.895	90.4438	101.361	92.923	54.7452	#DIV/0!	7.96387	-Inf	0.0202324	-Inf	ICE2	-	-
chr2:10099724-10099774:mpeak_103197|chr2_10091791_10140720_GRHL1_NM_+|	65.9119	-4.27993	1.99524	-2.14507	0.0319476	0.379583	0	0	0	0	0	10.5067	55.5439	66.6281	262.055	91.3497	66.5244	238.335	#DIV/0!	7.95538	-Inf	-0.0443042	-Inf	GRHL1	-	-
chr17:5191497-5191548:mpeak_82636|chr17_5185557_5286888_RABEP1_NM_+|	39.6951	-2.95424	1.44655	-2.04227	0.0411248	0.420242	0	2.11518	0	0	3.16783	7.18877	63.8754	82.4919	122.138	70.0765	51.7412	73.5466	2.36328	7.95176	-2.2917	0.458783	-2.75048	RABEP1	-	-
chr2:227725857-227725907:mpeak_119019|chr2_227700670_227860146_RHBDD1_NM_+|	33.8254	-4.10362	1.52916	-2.68357	0.00728404	0.270782	0	1.05759	0	1.25137	4.22377	7.74175	56.9325	68.7432	99.7201	40.0437	44.3496	81.8414	1.40764	7.95074	-3.64353	0.439239	-4.08277	RHBDD1	-	-
chr20:33054596-33054722:mpeak_122369|chr20_32951040_33095499_ITCH_NM_+|	43.1888	-4.05729	1.67066	-2.42856	0.015159	0.298435	1.3886	0	0	0	1.05594	9.4007	80.5386	70.8584	157.697	70.0765	57.0209	70.2287	1.34774	7.94875	-2.91272	0.647463	-3.56018	ITCH	-	-
chr15:100217567-100217760:mpeak_73852|chr15_100106132_100252594_MEF2A_NM_+|	46.1621	-2.62771	1.27509	-2.06081	0.0393214	0.412293	0	4.23035	0	2.50273	5.27971	9.95368	73.5956	71.916	163.108	71.3279	47.5174	104.514	4.1122	7.94064	-2.06784	0.466466	-2.53431	MEF2A	-	-
chr11:9705378-9705428:mpeak_32092|chr11_9685623_9771410_SWAP70_NM_+|	60.5062	-3.38333	1.69051	-2.00136	0.0453533	0.437019	1.3886	0	0	0	0	8.84772	159.689	117.392	102.812	125.137	90.8111	119.997	1.09657	7.90104	-2.67168	0.177369	-2.84905	SWAP70	-	-
chr2:203151712-203151762:mpeak_117178|chr2_203130514_203168108_NOP58_NM_+|	53.886	-3.85109	1.84882	-2.08299	0.0372519	0.403062	0	0	0	0	0	9.4007	66.6526	62.3977	150.74	93.8524	73.916	189.673	#DIV/0!	7.88999	-Inf	-0.353362	-Inf	NOP58	-	-
chr15:59021543-59021593:mpeak_69720|chr15_58889840_59042177_ADAM10_NM_-|	35.742	-4.5151	1.75284	-2.57588	0.00999862	0.281348	0	0	0	3.7541	1.05594	14.9305	30.5491	30.6701	97.401	62.5683	47.5174	140.457	#DIV/0!	7.8791	-Inf	-0.659483	-Inf	ADAM10	-	-
chr5:98193500-98193629:mpeak_162744|chr5_98192429_98262238_CHD1_NM_-|	40.6134	-3.59396	1.49708	-2.40065	0.0163658	0.305179	0	1.05759	0	8.75956	7.3916	6.63579	31.9377	46.5339	95.082	85.0929	64.4125	140.457	1.82812	7.85857	-4.42936	-0.740487	-3.68887	CHD1	-	-
chr14:92455076-92455126:mpeak_65230|chr14_92436237_92506403_TRIP11_NM_-|	36.224	-3.45123	1.49957	-2.30148	0.0213645	0.329293	0	1.05759	0	0	5.27971	5.52982	68.0412	62.3977	85.8057	81.3388	52.7971	72.4407	1.46721	7.84905	-3.35345	0.0659873	-3.41944	TRIP11	-	-
chr18:47497937-47497987:mpeak_94810|chr18_47352993_47721451_MYO5B_NM_-|	36.7779	-3.49322	1.65315	-2.11307	0.0345948	0.390339	0	1.05759	0	1.25137	0	9.95368	63.8754	88.8374	61.8419	60.0656	78.1398	76.3116	1.47877	7.83508	-3.4053	0.000254849	-3.40555	MYO5B	-	-
chr1:111709224-111709274:mpeak_9135|chr1_111682248_111726812_CEPT1_NM_+|	29.2353	-3.89831	1.87848	-2.07525	0.0379636	0.407388	0	0	0	0	3.16783	6.63579	26.3833	20.0942	106.677	58.8142	19.007	110.043	#DIV/0!	7.82767	-Inf	-0.294703	-Inf	CEPT1	-	-
chrX:9879353-9879461:mpeak_210558|chrX_9754495_9914710_SHROOM2_NM_+|	38.5515	-3.6882	1.59024	-2.31927	0.0203801	0.322705	0	1.05759	0	0	4.22377	6.0828	45.8237	68.7432	139.144	55.0601	62.3006	80.1824	1.25054	7.82607	-3.28471	0.36102	-3.64573	SHROOM2	-	-
chr18:20532316-20532401:mpeak_93483|chr18_20513294_20606105_RBBP8_NM_+|	36.3261	-3.12006	1.39461	-2.23724	0.0252709	0.349352	0	2.11518	0	1.25137	8.44754	5.52982	81.9272	47.5915	94.3089	62.5683	46.4615	85.7122	2.83501	7.81995	-2.84795	0.200824	-3.04877	RBBP8	-	-
chr10:114727317-114727377:mpeak_29611|chr10_114710008_114925313_TCF7L2_NM_+|	56.0545	-4.25451	1.69239	-2.51392	0.0119399	0.289771	1.3886	0	0	0	5.27971	8.84772	69.4298	76.1464	240.41	63.8197	59.1328	148.199	1.07926	7.81524	-3.3468	0.509451	-3.85625	TCF7L2	-	-
chr17:43107067-43107117:mpeak_86746|chr17_43102092_43138477_DCAKD_NM_-|	82.7697	-3.74243	1.73274	-2.15983	0.0307859	0.373891	0	1.05759	0	0	0	12.1656	173.575	173.444	165.427	126.388	163.671	177.507	0.619141	7.8057	-3.52396	0.132229	-3.65619	DCAKD	-	-
chr9:99111072-99111131:mpeak_205833|chr9_99077181_99145992_SLC35D2_NR_-mpeak_205833|chr9_99083623_99145992_SLC35D2_NM_-||	57.2061	-4.18767	1.96183	-2.13458	0.0327956	0.383353	0	0	0	0	0	8.29473	37.4921	78.2615	243.503	83.8415	57.0209	178.06	#DIV/0!	7.80258	-Inf	0.171806	-Inf	SLC35D2	-	-
chr3:27518763-27519049:mpeak_133501|chr3_27418336_27525911_SLC4A7_NM_-|	81.5682	-4.17078	1.35886	-3.06932	0.00214546	0.267856	1.3886	1.05759	0	12.5137	7.3916	16.0365	105.533	117.392	255.871	111.372	100.315	249.948	0.766354	7.78576	-3.87706	0.052663	-3.92972	SLC4A7	-	-
chr3:17308024-17308074:mpeak_132940|chr3_17202748_17782399_TBC1D5_NM_-|	72.8641	-3.56181	1.81359	-1.96395	0.0495359	0.454684	1.3886	0	0	0	0	10.5067	86.093	118.45	251.233	108.869	98.2027	199.627	0.914	7.75022	-2.91961	0.164366	-3.08397	TBC1D5	-	-
chr1:111504777-111504919:mpeak_9110|chr1_111491021_111506566_LRIF1_NM_-|	64.6302	-4.31434	1.75119	-2.46366	0.0137528	0.293236	0	1.05759	0	1.25137	0	17.1424	106.922	106.816	186.299	132.645	104.538	118.891	0.793118	7.74859	-4.12037	0.167956	-4.28833	LRIF1	-	-
chr6:35015957-35016008:mpeak_172129|chr6_34857037_35056382_ANKS1A_NM_+|	26.632	-4.48558	1.69029	-2.65374	0.00796057	0.273277	0	0	0	2.50273	1.05594	8.29473	33.3263	31.7277	89.6708	30.0328	42.2377	80.7354	#DIV/0!	7.74703	-Inf	0.0161167	-Inf	ANKS1A	-	-
chr10:93618365-93618458:mpeak_27698|chr10_93558150_93622693_TNKS2_NM_+|	88.444	-2.17604	0.899512	-2.41913	0.0155577	0.29993	4.16579	2.11518	3.0921	17.5191	8.44754	10.5067	137.471	127.968	279.062	148.913	135.161	186.908	1.7214	7.74412	-1.96025	0.209265	-2.16951	TNKS2	-	-
chr3:56713080-56713130:mpeak_135891|chr3_56657871_56717135_FAM208A_NM_-|	64.0494	-4.05761	1.76193	-2.30293	0.0212829	0.329134	0	0	0	0	0	11.0596	101.368	104.701	122.911	113.874	139.384	175.295	#DIV/0!	7.74206	-Inf	-0.381479	-Inf	FAM208A	-	-
chr2:171917506-171917556:mpeak_115037|chr2_171850466_172087824_TLK1_NM_-|	76.6049	-4.67253	1.72663	-2.70616	0.00680665	0.269946	0	0	0	0	0	10.5067	158.3	160.753	180.888	156.421	123.545	128.845	#DIV/0!	7.71016	-Inf	0.290324	-Inf	TLK1	-	-
chr3:42605750-42605814:mpeak_134550|chr3_42594940_42642572_SEC22C_NM_-|	64.6238	-2.3128	1.05367	-2.19499	0.0281644	0.363812	2.77719	4.23035	0	10.0109	8.44754	6.0828	97.2018	116.335	211.036	98.8579	72.8601	147.646	2.47574	7.68442	-1.80823	0.410807	-2.21904	SEC22C	-	-
chr8:26241937-26241987:mpeak_192733|chr8_26240522_26267879_BNIP3L_NM_+|	76.5761	-4.30868	1.90025	-2.26743	0.0233642	0.340247	0	0	0	0	0	12.7186	122.196	95.183	190.937	100.109	101.371	296.398	#DIV/0!	7.66368	-Inf	-0.286106	-Inf	BNIP3L	-	-
chr4:36169173-36169223:mpeak_148175|chr4_36069900_36245979_ARAP2_NM_-|	29.3026	-4.58	1.5856	-2.88849	0.003871	0.267856	0	0	0	3.7541	1.05594	8.29473	45.8237	34.9004	86.5787	72.5792	53.8531	44.7916	#DIV/0!	7.65359	-Inf	-0.0334223	-Inf	ARAP2	-	-
chr17:12709619-12709677:mpeak_83365|chr17_12692828_12893348_ARHGAP44_NM_+|	46.2919	-4.09169	1.53982	-2.65725	0.0078781	0.273136	1.3886	0	0	5.00546	2.11189	15.4835	65.264	100.471	70.3452	87.5956	71.8041	136.034	1.76457	7.65007	-4.02468	-0.323556	-3.70112	ARHGAP44	-	-
chr8:42210995-42211045:mpeak_193637|chr8_42195972_42229080_POLB_NM_+|	62.5609	-4.23387	1.77135	-2.39019	0.0168398	0.306866	0	0	0	0	0	9.4007	109.699	93.0678	169.292	113.874	83.4195	171.977	#DIV/0!	7.63723	-Inf	0.010851	-Inf	POLB	-	-
chr3:65550088-65550142:mpeak_136739|chr3_65342807_66024509_MAGI1_NM_-|	46.9491	-4.10123	1.66919	-2.45702	0.0140095	0.293546	1.3886	0	0	0	1.05594	9.95368	97.2018	97.2981	139.917	48.8033	65.4685	102.302	1.24569	7.62533	-2.98707	0.626793	-3.61386	MAGI1	-	-
chr17:44290059-44290120:mpeak_86920|chr17_44109069_44302740_KANSL1_NM_-|	50.3197	-4.77349	1.60329	-2.97731	0.00290788	0.267856	0	0	0	0	4.22377	11.0596	73.5956	103.644	108.996	66.3224	96.0908	139.905	#DIV/0!	7.58312	-Inf	-0.078862	-Inf	KANSL1	-	-
chr6:101311349-101311411:mpeak_175899|chr6_100957409_101329248_ASCC3_NM_-|	39.3315	-2.45807	1.19407	-2.05856	0.039536	0.413062	1.3886	2.11518	0	5.00546	7.3916	4.42386	70.8184	90.9526	68.0261	106.366	71.8041	43.6856	2.28709	7.58192	-2.26328	0.0507384	-2.31401	ASCC3	-	-
chrY:1505086-1505136:mpeak_215430|chrY_1472382_1522655_ASMTL_NM_-|	30.9433	-4.07788	1.52186	-2.67953	0.00737249	0.271829	0	1.05759	0	2.50273	1.05594	6.63579	55.5439	68.7432	101.266	51.306	41.1818	42.0267	1.40666	7.57871	-3.26894	0.745707	-4.01464	ASMTL	-	-
chrX:41475481-41475533:mpeak_211629|chrX_41379849_41782287_CASK_NM_-|	28.6337	-3.5327	1.66494	-2.12182	0.0338532	0.387244	1.3886	0	0	2.50273	5.27971	4.42386	27.7719	27.4973	113.635	28.7814	43.2937	89.0301	2.46637	7.5766	-3.13593	0.0681982	-3.20413	CASK	-	-
chr11:59348919-59348968:mpeak_34763|chr11_59344192_59383617_OSBP_NM_-|	51.7015	-3.85637	1.72366	-2.23731	0.0252661	0.349352	0	0	0	0	0	8.29473	81.9272	80.3767	120.592	120.131	80.2517	128.845	#DIV/0!	7.55836	-Inf	-0.218815	-Inf	OSBP	-	-
chr2:32776102-32776153:mpeak_105198|chr2_32582095_32842791_BIRC6_NM_+|	43.4374	-4.53611	1.90212	-2.38476	0.0170901	0.308528	0	0	0	0	1.05594	12.1656	44.4351	39.1308	161.562	76.3333	42.2377	144.328	#DIV/0!	7.54369	-Inf	-0.100976	-Inf	BIRC6	-	-
chr10:114369056-114369106:mpeak_29561|chr10_114206755_114575048_VTI1A_NM_+|	58.859	-4.12725	1.72312	-2.39521	0.0166107	0.306117	0	0	0	0	0	8.84772	134.694	103.644	106.677	145.158	83.4195	123.868	#DIV/0!	7.53113	-Inf	-0.0307437	-Inf	VTI1A	-	-
chr12:32749146-32749279:mpeak_43489|chr12_32638905_32793209_FGD4_NM_+|	35.8541	-2.35585	1.18231	-1.99258	0.0463079	0.441041	2.77719	1.05759	0	6.25683	4.22377	3.87088	61.0982	63.4553	96.628	83.8415	51.7412	55.2982	2.60066	7.51855	-1.90398	0.212558	-2.11654	FGD4	-	-
chr5:118803317-118803367:mpeak_164199|chr5_118788137_118877599_HSD17B4_NM_+|	52.3691	-3.82946	1.89076	-2.02536	0.0428306	0.428566	0	0	0	0	0	8.29473	59.7096	48.6491	180.115	91.3497	63.3566	176.954	#DIV/0!	7.50291	-Inf	-0.20127	-Inf	HSD17B4	-	-
chr7:47414663-47414723:mpeak_183990|chr7_47317818_47621742_TNS3_NM_-|	34.8284	-4.14995	1.67354	-2.47975	0.0131476	0.291965	0	1.05759	0	2.50273	1.05594	8.29473	45.8237	45.4763	155.378	37.541	41.1818	79.6294	1.2862	7.48547	-3.48645	0.639491	-4.12594	TNS3	-	-
chr13:94537045-94537095:mpeak_57602|chr13_93879077_95055268_GPC6_NM_+|	47.3418	-4.69269	1.84365	-2.54532	0.0109178	0.286712	1.3886	0	0	1.25137	3.16783	9.4007	33.3263	58.1674	276.743	33.7869	25.3426	125.527	1.13128	7.48411	-3.31505	0.995788	-4.31084	GPC6	-	-
chr3:9437611-9437661:mpeak_131865|chr3_9432181_9439174_THUMPD3-AS1_NR_-|	58.669	-4.07725	1.79537	-2.27098	0.0231479	0.338978	0	0	0	0	0	8.84772	73.5956	103.644	163.108	71.3279	108.762	174.742	#DIV/0!	7.48048	-Inf	-0.0601297	-Inf	THUMPD3-AS1	-	-
chr1:28397980-28398030:mpeak_2639|chr1_28315167_28415148_EYA3_NR_-mpeak_2639|chr1_28301057_28415148_EYA3_NM_-||	79.6004	-4.74185	1.79451	-2.64242	0.00823148	0.273277	0	0	0	0	0	9.95368	130.528	120.565	294.522	126.388	103.482	169.766	#DIV/0!	7.47206	-Inf	0.449198	-Inf	EYA3	-	-
chr11:12928803-12928855:mpeak_32372|chr11_12695968_12958655_TEAD1_NM_+|	85.5623	-4.07639	1.2847	-3.17303	0.00150857	0.267856	1.3886	1.05759	0	15.0164	11.6154	11.6126	138.86	116.335	218.766	148.913	107.706	255.478	0.774174	7.4682	-3.96664	-0.11165	-3.85499	TEAD1	-	-
chr17:34915268-34915323:mpeak_85611|chr17_34900736_34945637_GGNBP2_NM_+|	55.0737	-4.99225	1.55244	-3.21574	0.00130107	0.267856	0	0	0	0	5.27971	9.95368	101.368	84.6071	153.059	117.628	84.4754	104.514	#DIV/0!	7.45231	-Inf	0.144987	-Inf	GGNBP2	-	-
chr19:48693107-48693157:mpeak_101031|chr19_48673948_48697909_C19orf68_NM_+|	31.2647	-2.64749	1.34902	-1.96253	0.049701	0.455005	2.77719	0	0	6.25683	2.11189	4.97684	77.7614	61.3401	40.1973	65.071	65.4685	49.2154	4.64676	7.42431	-2.26466	-0.0036655	-2.26099	C19orf68	-	-
chr3:39449553-39449850:mpeak_134353|chr3_39448179_39453764_RPSA_NM_+|	1222.31	-0.987017	0.490685	-2.01151	0.0442715	0.433291	116.642	81.4343	71.1182	173.94	162.615	164.789	2266.19	2334.1	2544.02	2516.5	1820.45	2415.98	3.76796	7.4241	-0.897151	0.0812826	-0.978433	RPSA	-	-
chr11:28151378-28151428:mpeak_33158|chr11_28129797_28351942_METTL15_NM_+|	52.3615	-3.71413	1.70722	-2.17554	0.0295895	0.368967	0	0	0	0	0	8.84772	80.5386	96.2405	85.0326	133.896	108.762	115.02	#DIV/0!	7.42095	-Inf	-0.450134	-Inf	METTL15	-	-
chr6:151708112-151708174:mpeak_179279|chr6_151688027_151712835_ZBTB2_NM_-|	49.0101	-2.4042	1.106	-2.17378	0.0297218	0.369234	1.3886	3.17277	0	7.5082	6.33566	5.52982	76.3728	78.2615	148.421	102.612	62.3006	96.2189	2.25769	7.41912	-2.08656	0.214803	-2.30136	ZBTB2	-	-
chr15:91324182-91324276:mpeak_73314|chr15_91260557_91358331_BLM_NM_+|	23.707	-3.6709	1.49838	-2.44992	0.0142887	0.293828	0	0	0	1.25137	5.27971	6.63579	38.8807	30.6701	23.9637	62.5683	53.8531	61.381	#DIV/0!	7.40534	-Inf	-0.927013	-Inf	BLM	-	-
chr2:28130061-28130111:mpeak_104759|chr2_28113481_28561316_BRE_NM_+|	58.9907	-4.1622	1.81241	-2.2965	0.0216473	0.330688	0	0	0	0	0	8.29473	87.4816	75.0888	200.986	91.3497	76.0279	168.66	#DIV/0!	7.40519	-Inf	0.113559	-Inf	BRE	-	-
chr14:64193240-64193290:mpeak_62415|chr14_64153374_64194813_SGPP1_NM_-|	68.9484	-4.36452	2.05648	-2.12232	0.0338106	0.387244	0	0	0	0	0	9.4007	49.9895	53.937	333.173	101.361	52.7971	226.723	#DIV/0!	7.40445	-Inf	0.198624	-Inf	SGPP1	-	-
chr2:171863989-171864049:mpeak_115022|chr2_171850466_172087824_TLK1_NM_-|	79.284	-1.60032	0.813869	-1.96631	0.0492632	0.453207	2.77719	4.23035	5.41117	6.25683	7.3916	16.5895	158.3	160.753	180.888	156.421	123.545	128.845	2.48404	7.39655	-1.28384	0.290324	-1.57417	TLK1	-	-
chr15:100221601-100221672:mpeak_73856|chr15_100106132_100252594_MEF2A_NM_+|	45.9087	-3.45912	1.38208	-2.50284	0.0123202	0.29001	1.3886	1.05759	0	2.50273	8.44754	5.52982	73.5956	71.916	163.108	71.3279	47.5174	104.514	1.18893	7.3783	-2.75212	0.466466	-3.21859	MEF2A	-	-
chr7:135312379-135312434:mpeak_189645|chr7_135242661_135333151_NUP205_NM_+|	37.579	-4.24077	2.09241	-2.02674	0.0426892	0.427957	0	0	0	3.7541	0	7.18877	16.6632	17.979	180.888	32.5355	22.1748	169.766	#DIV/0!	7.31228	-Inf	-0.0586731	-Inf	NUP205	-	-
chr11:128869869-128869919:mpeak_40493|chr11_128841054_129062093_ARHGAP32_NM_-|	75.8626	-4.11916	1.85212	-2.22403	0.0261467	0.353468	0	0	0	0	0	12.7186	95.8132	97.2981	180.888	132.645	127.769	263.22	#DIV/0!	7.28673	-Inf	-0.485523	-Inf	ARHGAP32	-	-
chr14:73537388-73537438:mpeak_63714|chr14_73525220_73586420_RBM25_NM_+|	82.5711	-4.37075	1.92989	-2.26477	0.0235268	0.340816	0	0	0	0	0	12.7186	88.8702	96.2405	266.693	135.148	100.315	290.869	#DIV/0!	7.24939	-Inf	-0.220273	-Inf	RBM25	-	-
chr1:90349967-90350017:mpeak_7113|chr1_90286572_90398625_LRRC8D_NM_+|	59.6529	-4.05719	1.70676	-2.37713	0.0174477	0.309843	0	0	0	0	0	8.84772	115.254	109.989	115.181	147.661	95.0349	123.868	#DIV/0!	7.24107	-Inf	-0.106736	-Inf	LRRC8D	-	-
chr7:128120352-128120402:mpeak_188807|chr7_128116782_128141815_METTL2B_NM_+|	84.5948	-4.8308	1.73174	-2.78956	0.00527797	0.267856	0	0	0	0	0	9.95368	212.455	193.539	186.299	188.956	117.21	106.726	#DIV/0!	7.23218	-Inf	0.520548	-Inf	METTL2B	-	-
chr6:52415070-52415126:mpeak_173497|chr6_52368068_52441862_TRAM2_NM_-|	39.996	-4.22045	1.64804	-2.56089	0.0104405	0.28376	1.3886	0	0	2.50273	2.11189	9.4007	41.6579	63.4553	165.427	57.5628	38.0139	98.4308	1.5398	7.22411	-3.3353	0.47973	-3.81504	TRAM2	-	-
chr5:128822392-128822442:mpeak_164753|chr5_128796102_129072759_ADAMTS19_NM_+|	32.9479	-3.84827	1.69083	-2.27597	0.022848	0.337434	0	0	0	0	3.16783	7.74175	33.3263	35.958	88.1247	53.8087	54.909	118.338	#DIV/0!	7.2072	-Inf	-0.528529	-Inf	ADAMTS19	-	-
chr1:100682359-100682409:mpeak_7868|chr1_100661978_100715409_DBT_NM_-|	70.0023	-4.5843	1.67928	-2.72992	0.00633487	0.268895	0	0	0	0	0	8.29473	134.694	169.214	182.434	127.639	119.322	98.4308	#DIV/0!	7.20463	-Inf	0.493737	-Inf	DBT	-	-
chr21:33092127-33092352:mpeak_126560|chr21_33044667_33104431_SCAF4_NM_-|	52.5871	-2.25742	1.08223	-2.08591	0.0369871	0.401776	2.77719	2.11518	0	6.25683	6.33566	11.0596	109.699	111.047	53.3387	100.109	106.65	121.656	2.67748	7.20189	-2.27336	-0.260902	-2.01246	SCAF4	-	-
chr4:26351557-26351607:mpeak_147966|chr4_26321331_26432313_RBPJ_NM_+|	76.756	-4.79631	1.69532	-2.82914	0.00466728	0.267856	0	0	0	0	0	8.29473	145.803	159.696	261.282	115.126	110.874	119.997	#DIV/0!	7.19203	-Inf	0.712032	-Inf	RBPJ	-	-
chr1:180770590-180770640:mpeak_15908|chr1_180601145_180853141_XPR1_NM_+|	41.6782	-3.35868	1.42723	-2.35329	0.0186084	0.314093	1.3886	1.05759	0	3.7541	1.05594	9.95368	74.9842	63.4553	139.144	87.5956	59.1328	58.6161	1.32186	7.18973	-2.59345	0.434877	-3.02833	XPR1	-	-
chr8:42205306-42205356:mpeak_193634|chr8_42195972_42229080_POLB_NM_+|	62.5148	-4.15828	1.75809	-2.36523	0.0180188	0.313389	0	0	0	0	0	8.84772	109.699	93.0678	169.292	113.874	83.4195	171.977	#DIV/0!	7.18798	-Inf	0.010851	-Inf	POLB	-	-
chr3:12701111-12701175:mpeak_132385|chr3_12626156_12705700_RAF1_NM_-|	97.6471	-6.23724	1.79385	-3.477	0.000507049	0.267856	0	0	0	5.00546	5.27971	28.7551	72.207	85.6647	431.347	115.126	85.5314	342.849	#DIV/0!	7.18304	-Inf	0.116508	-Inf	RAF1	-	-
chr18:46924279-46924329:mpeak_94758|chr18_46570574_46987079_DYM_NM_-|	40.4124	-3.33956	1.68772	-1.97874	0.0478458	0.448213	0	1.05759	0	1.25137	0	11.0596	61.0982	51.8218	100.493	91.3497	73.916	92.901	1.48668	7.15294	-3.5411	-0.274654	-3.26645	DYM	-	-
chr2:136417532-136417582:mpeak_112345|chr2_136289024_136481506_R3HDM1_NM_+|	46.692	-4.37891	1.81322	-2.41499	0.0157355	0.300524	0	0	0	0	2.11189	12.7186	48.6009	46.5339	138.371	76.3333	57.0209	178.613	#DIV/0!	7.13078	-Inf	-0.417936	-Inf	R3HDM1	-	-
chr6:89342653-89342703:mpeak_175315|chr6_89322601_89673348_RNGTT_NM_-|	69.4915	-4.14648	1.76797	-2.34533	0.0190102	0.315087	0	0	0	0	0	10.5067	141.637	98.3557	139.917	158.923	98.2027	186.355	#DIV/0!	7.1074	-Inf	-0.223216	-Inf	RNGTT	-	-
chr16:1239935-1239985:mpeak_74209|chr16_1203240_1269980_CACNA1H_NM_+|	98.9067	-5.10034	1.71055	-2.9817	0.00286649	0.267856	0	0	0	0	0	10.5067	236.061	264.397	230.361	158.923	147.832	138.799	#DIV/0!	7.07434	-Inf	0.713915	-Inf	CACNA1H	-	-
chr14:89341829-89341964:mpeak_64845|chr14_89290496_89343637_TTC8_NM_+|	49.9135	-3.76156	1.73563	-2.16726	0.0302148	0.372039	0	1.05759	0	7.5082	8.44754	9.4007	18.0518	34.9004	160.789	67.5738	50.6853	240.547	1.4844	7.06689	-4.5835	-0.74734	-3.83616	TTC8	-	-
chr10:114231886-114231936:mpeak_29536|chr10_114206755_114575048_VTI1A_NM_+|	58.813	-4.04804	1.7085	-2.36935	0.0178194	0.312512	0	0	0	0	0	8.29473	134.694	103.644	106.677	145.158	83.4195	123.868	#DIV/0!	7.06043	-Inf	-0.0307437	-Inf	VTI1A	-	-
chr4:56834243-56834334:mpeak_149683|chr4_56814973_56897525_CEP135_NM_+|	28.3933	-4.3584	1.49664	-2.91213	0.00358974	0.267856	0	0	0	2.50273	2.11189	7.74175	45.8237	45.4763	61.8419	55.0601	54.909	65.2519	#DIV/0!	7.05188	-Inf	-0.194307	-Inf	CEP135	-	-
chr17:17807329-17807379:mpeak_83942|chr17_17751097_17875784_TOM1L2_NM_-|	73.4743	-4.18811	1.8133	-2.30966	0.0209073	0.327344	0	0	0	0	0	11.0596	101.368	131.141	166.973	108.869	115.098	247.183	#DIV/0!	7.04212	-Inf	-0.238056	-Inf	TOM1L2	-	-
chr13:21457162-21457275:mpeak_53532|chr13_21358058_21476913_XPO4_NM_-|	33.9452	-3.63973	1.48157	-2.45668	0.0140227	0.293546	1.3886	0	0	1.25137	6.33566	6.63579	51.3781	57.1098	80.3945	71.3279	48.5734	82.9473	2.20549	7.01154	-3.35651	-0.102915	-3.25359	XPO4	-	-
chr1:111504396-111504446:mpeak_9109|chr1_111491021_111506566_LRIF1_NM_-|	63.7005	-4.24779	1.71113	-2.48245	0.0130482	0.29152	0	0	0	0	0	8.29473	106.922	106.816	186.299	132.645	104.538	118.891	#DIV/0!	6.98849	-Inf	0.167956	-Inf	LRIF1	-	-
chr1:8660241-8660291:mpeak_683|chr1_8415180_8877699_RERE_NM_-|	72.5206	-4.53951	1.87093	-2.42633	0.0152523	0.299215	0	0	0	0	0	8.29473	87.4816	103.644	314.621	77.5847	83.4195	195.203	#DIV/0!	6.98588	-Inf	0.505698	-Inf	RERE	-	-
chr2:236418332-236418387:mpeak_119628|chr2_236402732_237032562_AGAP1_NM_+|	95.9408	-3.63978	1.6033	-2.27018	0.0231964	0.339145	1.3886	1.05759	0	8.75956	15.8391	0	149.968	150.178	295.295	157.672	126.713	244.418	0.616228	6.97765	-3.32998	0.171227	-3.5012	AGAP1	-	-
chr4:74038978-74039028:mpeak_150162|chr4_73942007_74124502_ANKRD17_NM_-|	78.7314	-4.35385	1.85508	-2.34699	0.0189257	0.315087	0	0	0	0	0	11.0596	102.756	99.4133	254.325	122.634	114.042	240.547	#DIV/0!	6.9525	-Inf	-0.0640665	-Inf	ANKRD17	-	-
chr2:8911938-8912000:mpeak_102993|chr2_8872112_8977755_KIDINS220_NM_-|	138.9	-4.97632	1.9133	-2.60091	0.00929769	0.277708	0	0	0	0	0	21.0133	204.124	266.512	267.466	237.76	274.545	395.382	#DIV/0!	6.94512	-Inf	-0.298374	-Inf	KIDINS220	-	-
chr12:65581962-65582012:mpeak_47134|chr12_65563350_65639941_LEMD3_NM_+|	82.0511	-4.47092	1.85876	-2.40533	0.016158	0.303114	0	0	0	0	0	11.0596	126.362	77.204	292.203	133.896	141.496	202.392	#DIV/0!	6.94434	-Inf	0.0533104	-Inf	LEMD3	-	-
chr9:135797363-135797413:mpeak_209645|chr9_135772141_135820020_TSC1_NM_-|	79.6092	-4.65454	1.70055	-2.73708	0.00619866	0.268895	0	0	0	0	0	9.4007	158.3	173.444	207.943	150.164	116.154	139.905	#DIV/0!	6.94253	-Inf	0.409857	-Inf	TSC1	-	-
chr14:51390186-51390236:mpeak_61033|chr14_51372274_51411248_PYGL_NM_-|	45.8612	-4.28561	1.74491	-2.45607	0.0140465	0.293546	0	0	0	1.25137	0	13.2716	56.9325	98.3557	66.4801	122.634	115.098	76.3116	#DIV/0!	6.93676	-Inf	-0.50191	-Inf	PYGL	-	-
chr16:28579701-28579751:mpeak_77170|chr16_28565248_28602910_CCDC101_NM_+|	66.3043	-4.13599	1.71455	-2.41229	0.0158527	0.300676	0	0	0	0	0	9.4007	115.254	135.371	128.322	155.169	105.594	146.54	#DIV/0!	6.92409	-Inf	-0.10411	-Inf	CCDC101	-	-
chr15:77532152-77532203:mpeak_71888|chr15_77407661_77712446_PEAK1_NM_-|	26.3211	-3.89086	1.49152	-2.60866	0.00908983	0.277333	0	0	0	1.25137	7.3916	3.87088	44.4351	45.4763	32.467	53.8087	70.7482	56.4042	#DIV/0!	6.91521	-Inf	-0.564331	-Inf	PEAK1	-	-
chr14:76105051-76105101:mpeak_64229|chr14_76044939_76112743_FLVCR2_NM_+|	97.8869	-3.8673	1.74236	-2.21957	0.0264477	0.355112	1.3886	0	0	0	0	12.1656	230.507	232.669	169.292	181.448	212.245	134.928	0.658655	6.90417	-3.13111	0.258762	-3.38987	FLVCR2	-	-
chr9:134514337-134514387:mpeak_209501|chr9_134455034_134615331_RAPGEF1_NM_-|	64.3917	-3.77658	1.81462	-2.0812	0.0374159	0.403778	0	0	0	0	0	10.5067	87.4816	94.1254	123.684	135.148	83.4195	238.335	#DIV/0!	6.89863	-Inf	-0.581702	-Inf	RAPGEF1	-	-
chr4:143093708-143093758:mpeak_154577|chr4_142950067_143767604_INPP4B_NM_-|	66.949	-3.53754	1.78184	-1.98533	0.0471075	0.444565	0	0	0	0	0	12.1656	95.8132	90.9526	74.2103	208.978	152.056	169.213	#DIV/0!	6.88299	-Inf	-1.02275	-Inf	INPP4B	-	-
chr7:138655223-138655273:mpeak_189817|chr7_138522905_138666064_KIAA1549_NM_-|	50.8099	-3.48058	1.70884	-2.0368	0.0416698	0.422429	0	0	0	0	0	8.29473	77.7614	80.3767	81.1675	106.366	99.2586	156.494	#DIV/0!	6.87184	-Inf	-0.597608	-Inf	KIAA1549	-	-
chr3:65988018-65988068:mpeak_136827|chr3_65342807_66024509_MAGI1_NM_-|	46.8293	-3.96604	1.6467	-2.40847	0.0160193	0.301916	0	1.05759	0	0	1.05594	8.84772	97.2018	97.2981	139.917	48.8033	65.4685	102.302	0.948745	6.85933	-3.22718	0.626793	-3.85398	MAGI1	-	-
chr12:12418037-12418087:mpeak_42001|chr12_12274354_12419811_LRP6_NM_-|	70.7573	-3.49856	1.73853	-2.01236	0.0441818	0.433229	0	1.05759	0	0	0	8.29473	133.305	100.471	242.73	82.5902	110.874	169.766	0.66584	6.85082	-2.97142	0.391611	-3.36303	LRP6	-	-
chr1:204254785-204254835:mpeak_17699|chr1_204191907_204329057_PLEKHA6_NM_-|	134.961	-5.17474	1.8707	-2.7662	0.0056713	0.267856	0	0	0	0	0	17.1424	326.32	329.968	192.483	259.033	310.447	184.143	#DIV/0!	6.82401	-Inf	0.171532	-Inf	PLEKHA6	-	-
chr10:114834213-114834263:mpeak_29640|chr10_114710008_114925313_TCF7L2_NM_+|	55.7874	-5.05098	1.83375	-2.75446	0.00587896	0.267856	0	0	0	1.25137	0	11.0596	69.4298	76.1464	240.41	63.8197	59.1328	148.199	#DIV/0!	6.8104	-Inf	0.509451	-Inf	TCF7L2	-	-
chr8:131365418-131365468:mpeak_200320|chr8_131067051_131455906_ASAP1_NM_-|	58.0225	-3.72575	1.85515	-2.00832	0.0446091	0.434562	0	0	0	0	0	8.84772	58.3211	69.8008	168.519	81.3388	98.2027	211.239	#DIV/0!	6.79234	-Inf	-0.397641	-Inf	ASAP1	-	-
chr21:38817611-38817661:mpeak_127154|chr21_38739858_38884213_DYRK1A_NM_+|	67.893	-4.33693	1.69276	-2.56204	0.010406	0.28376	0	0	0	0	0	8.29473	111.088	138.544	188.618	115.126	133.049	119.997	#DIV/0!	6.75886	-Inf	0.251375	-Inf	DYRK1A	-	-
chr9:80232890-80232944:mpeak_204117|chr9_80039085_80263232_GNA14_NM_-|	56.2204	-2.8569	1.18021	-2.42068	0.0154917	0.299755	0	4.23035	0	1.25137	6.33566	8.29473	113.865	118.45	187.072	67.5738	81.3076	86.2652	3.0261	6.75398	-1.90852	0.83472	-2.74324	GNA14	-	-
chr6:139254124-139254174:mpeak_178318|chr6_139226269_139309398_REPS1_NM_-|	85.9521	-4.61479	1.77646	-2.59775	0.00938375	0.277708	0	0	0	0	0	10.5067	145.803	143.832	264.374	147.661	112.986	206.262	#DIV/0!	6.75077	-Inf	0.246766	-Inf	REPS1	-	-
chr4:141661468-141661550:mpeak_154476|chr4_141544071_141677471_TBC1D9_NM_-|	105.897	-3.31296	1.49734	-2.21256	0.0269277	0.357787	1.3886	0	1.54605	0	7.3916	19.9074	130.528	144.89	357.137	136.399	130.937	340.637	0.695903	6.73524	-3.21759	0.0571835	-3.27477	TBC1D9	-	-
chr1:90305930-90306035:mpeak_7095|chr1_90286572_90398625_LRRC8D_NM_+|	60.3725	-3.69429	1.67914	-2.20011	0.0277991	0.362743	0	1.05759	0	3.7541	12.6713	0	115.254	109.989	115.181	147.661	95.0349	123.868	0.932006	6.72137	-3.95708	-0.106736	-3.85034	LRRC8D	-	-
chr1:100461265-100461315:mpeak_7798|chr1_100435344_100487941_SLC35A3_NM_+|	78.3965	-4.34874	1.73385	-2.50814	0.012137	0.289971	0	0	0	0	0	10.5067	131.917	144.89	183.207	181.448	137.273	151.517	#DIV/0!	6.70299	-Inf	-0.0317159	-Inf	SLC35A3	-	-
chr13:47144947-47145003:mpeak_56000|chr13_47127295_47324674_LRCH1_NM_+|	123.72	-3.79723	1.83331	-2.07124	0.0383359	0.408663	0	1.05759	0	0	0	18.2484	198.569	248.533	200.986	271.546	212.245	333.448	0.489557	6.6988	-4.10892	-0.334567	-3.77435	LRCH1	-	-
chr12:111076318-111076388:mpeak_50836|chr12_111051831_111086847_TCTN1_NM_+|	63.239	-4.0602	1.878	-2.16198	0.0306195	0.373661	0	0	0	0	0	8.29473	72.207	94.1254	212.582	95.1038	57.0209	219.534	#DIV/0!	6.69544	-Inf	0.0278921	-Inf	TCTN1	-	-
chr15:48461623-48461673:mpeak_68350|chr15_48446090_48470558_MYEF2_NR_-mpeak_68350|chr15_48435268_48470558_MYEF2_NM_-||	45.9544	-4.77072	1.86549	-2.55736	0.010547	0.28376	0	0	0	0	1.05594	8.84772	56.9325	52.8794	209.49	48.8033	39.0699	134.375	#DIV/0!	6.6842	-Inf	0.522749	-Inf	MYEF2	-	-
chr7:51317253-51317303:mpeak_184093|chr7_51085265_51384515_COBL_NM_-|	70.1134	-5.13072	1.81835	-2.82163	0.00477798	0.267856	0	0	0	1.25137	0	16.5895	101.368	105.759	215.674	107.617	92.923	200.18	#DIV/0!	6.67829	-Inf	0.0773811	-Inf	COBL	-	-
chr15:85959166-85959286:mpeak_72820|chr15_85923846_86287858_AKAP13_NM_+|	50.4428	-4.1239	1.52844	-2.69812	0.00697329	0.269946	0	1.05759	0	3.7541	10.5594	4.97684	84.7044	89.895	121.365	62.5683	52.7971	173.636	1.07201	6.67482	-4.18903	0.0343437	-4.22337	AKAP13	-	-
chr17:18814978-18815028:mpeak_84139|chr17_18759611_18833852_PRPSAP2_NM_+|	83.2691	-4.30371	1.92346	-2.23748	0.0252551	0.349352	0	0	0	0	0	11.6126	111.088	69.8008	284.473	147.661	100.315	274.279	#DIV/0!	6.67067	-Inf	-0.166403	-Inf	PRPSAP2	-	-
chr8:17930308-17930358:mpeak_192234|chr8_17915132_17942507_ASAH1_NM_-|	43.0965	-4.67651	1.68921	-2.76845	0.00563231	0.267856	0	0	0	1.25137	0	8.29473	73.5956	69.8008	149.194	93.8524	68.6363	52.5333	#DIV/0!	6.65939	-Inf	0.444396	-Inf	ASAH1	-	-
chr1:51288924-51288974:mpeak_5035|chr1_50907195_51425936_FAF1_NM_-|	74.092	-4.04371	1.74791	-2.31345	0.0206978	0.325665	0	0	0	0	0	11.0596	115.254	154.408	108.996	172.689	154.168	172.53	#DIV/0!	6.64394	-Inf	-0.399263	-Inf	FAF1	-	-
chr15:90751273-90751323:mpeak_73195|chr15_90728151_90771135_SEMA4B_NM_+|	69.6501	-3.78405	1.88531	-2.00713	0.0447361	0.434562	0	0	0	0	0	11.0596	69.4298	81.4343	173.157	95.1038	122.489	283.127	#DIV/0!	6.62624	-Inf	-0.627915	-Inf	SEMA4B	-	-
chr4:15683821-15683875:mpeak_147422|chr4_15683351_15687858_FAM200B_NM_+|	30.7868	-3.81688	1.69553	-2.25114	0.0243767	0.344589	0	0	0	0	1.05594	7.74175	43.0465	34.9004	82.7136	60.0656	58.0769	81.8414	#DIV/0!	6.59881	-Inf	-0.315868	-Inf	FAM200B	-	-
chr1:236715361-236715415:mpeak_20204|chr1_236714290_236767841_HEATR1_NM_-|	54.0844	-4.49098	1.71106	-2.62467	0.00867324	0.274753	0	0	0	5.00546	0	10.5067	49.9895	65.5705	164.654	101.361	74.9719	176.954	#DIV/0!	6.5862	-Inf	-0.334311	-Inf	HEATR1	-	-
chr5:122184823-122184873:mpeak_164278|chr5_122181159_122343376_SNX24_NM_+|	77.594	-4.50004	1.79325	-2.50944	0.0120924	0.289771	0	0	0	0	0	8.84772	109.699	120.565	288.338	132.645	91.867	179.166	#DIV/0!	6.57533	-Inf	0.361423	-Inf	SNX24	-	-
chr3:137918601-137918651:mpeak_141201|chr3_137906089_138014700_ARMC8_NM_+|	54.317	-4.70316	1.92091	-2.44839	0.0143495	0.293828	0	0	0	1.25137	0	12.7186	36.1035	53.937	228.815	72.5792	86.5873	159.812	#DIV/0!	6.56939	-Inf	-0.000555418	-Inf	ARMC8	-	-
chr12:31230299-31230403:mpeak_43281|chr12_31226778_31256740_DDX11_NM_+|	59.2343	-4.72887	1.54065	-3.06939	0.00214495	0.267856	0	0	0	0	5.27971	11.0596	108.311	122.68	89.6708	136.399	136.217	101.196	#DIV/0!	6.55653	-Inf	-0.221259	-Inf	DDX11	-	-
chr4:184210113-184210163:mpeak_156701|chr4_184020462_184236815_WWC2_NM_+|	67.9311	-3.98535	1.94999	-2.04378	0.0409754	0.419756	0	0	0	0	0	9.4007	48.6009	61.3401	265.147	118.88	95.0349	216.769	#DIV/0!	6.54822	-Inf	-0.199399	-Inf	WWC2	-	-
chr7:148412165-148412215:mpeak_190479|chr7_148395932_148497593_CUL1_NM_+|	81.1779	-4.35122	1.8032	-2.41305	0.0158197	0.300586	0	0	0	0	0	10.5067	115.254	132.199	232.68	136.399	108.762	238.335	#DIV/0!	6.51918	-Inf	-0.010073	-Inf	CUL1	-	-
chr22:43353610-43353660:mpeak_130956|chr22_43267475_43411184_PACSIN2_NM_-|	83.8193	-4.23349	2.0294	-2.08608	0.0369715	0.401758	0	0	0	0	0	11.6126	84.7044	82.4919	292.203	77.5847	83.4195	373.816	#DIV/0!	6.51394	-Inf	-0.219305	-Inf	PACSIN2	-	-
chr7:2448666-2448717:mpeak_181130|chr7_2443194_2472197_CHST12_NM_+|	48.7927	-3.5675	1.31419	-2.71459	0.00663569	0.269946	0	2.11518	0	3.7541	4.22377	5.52982	101.368	111.047	149.967	86.3443	45.4055	75.7586	1.75107	6.50947	-2.67493	0.804338	-3.47927	CHST12	-	-
chr12:80309397-80309527:mpeak_48532|chr12_80169795_80329235_PPP1R12A_NM_-|	109.381	-1.83006	0.925163	-1.97809	0.0479182	0.448287	6.94298	7.40312	0	13.765	8.44754	12.7186	204.124	188.251	333.173	185.202	168.951	183.59	2.96592	6.49588	-1.28386	0.432153	-1.71601	PPP1R12A	-	-
chr12:64191401-64191458:mpeak_46875|chr12_64173582_64202454_TMEM5_NM_+|	45.8815	-3.91377	1.60518	-2.43822	0.01476	0.295484	1.3886	0	0	6.25683	5.27971	6.0828	40.2693	46.5339	173.157	73.8306	50.6853	147.093	1.60247	6.48702	-3.66546	-0.0632391	-3.60222	TMEM5	-	-
chr1:42688348-42688532:mpeak_4225|chr1_42645496_42801548_FOXJ3_NM_-|	82.7876	-2.55752	1.25255	-2.04185	0.0411662	0.420242	0	6.34553	0	10.0109	3.16783	12.7186	119.419	138.544	303.798	133.896	79.1957	186.355	3.38873	6.4833	-2.02899	0.491955	-2.52095	FOXJ3	-	-
chr10:74149587-74149637:mpeak_26084|chr10_74128113_74385949_MICU1_NM_-|	35.9864	-3.77986	1.74122	-2.1708	0.029946	0.370998	0	0	0	0	3.16783	7.74175	44.4351	32.7852	91.2168	53.8087	43.2937	155.388	#DIV/0!	6.48118	-Inf	-0.584018	-Inf	MICU1	-	-
chr1:212256865-212256915:mpeak_18399|chr1_212208894_212276183_DTL_NM_+|	60.4669	-2.8586	1.32703	-2.15414	0.0312295	0.376163	1.3886	1.05759	0	13.765	10.5594	4.97684	59.7096	64.5129	117.5	157.672	99.2586	195.203	1.51797	6.48067	-3.58236	-0.903399	-2.67896	DTL	-	-
chr4:110363028-110363078:mpeak_152988|chr4_110354927_110460716_SEC24B_NM_+|	53.5824	-4.6503	1.69883	-2.73735	0.0061937	0.268895	0	0	0	0	3.16783	10.5067	77.7614	74.0312	158.47	88.847	54.909	175.295	#DIV/0!	6.42898	-Inf	-0.0402994	-Inf	SEC24B	-	-
chr12:124230547-124230597:mpeak_52667|chr12_124196864_124242473_ATP6V0A2_NM_+|	59.7934	-3.51303	1.7736	-1.98074	0.0476206	0.446572	0	0	0	0	0	9.4007	80.5386	69.8008	118.273	158.923	88.6992	191.885	#DIV/0!	6.41675	-Inf	-0.710364	-Inf	ATP6V0A2	-	-
chrX:15830802-15830854:mpeak_210788|chrX_15808573_15840853_ZRSR2_NM_+|	73.4566	-4.22134	1.77372	-2.37993	0.017316	0.308962	1.3886	0	0	1.25137	0	16.0365	198.569	175.56	81.9405	183.951	129.881	92.901	0.913411	6.37563	-3.63806	0.165172	-3.80323	ZRSR2	-	-
chr5:115208222-115208272:mpeak_163986|chr5_115177618_115249058_AP3S1_NM_+|	83.5303	-4.4984	1.94017	-2.31856	0.0204189	0.322938	0	0	0	0	0	9.4007	83.3158	112.104	354.818	100.109	74.9719	267.643	#DIV/0!	6.37012	-Inf	0.313647	-Inf	AP3S1	-	-
chr12:102151590-102151640:mpeak_49936|chr12_102141019_102224645_GNPTAB_NM_-|	71.9791	-4.33319	1.68671	-2.56902	0.0101988	0.282643	0	0	0	0	0	8.29473	154.134	126.911	183.207	135.148	104.538	151.517	#DIV/0!	6.36094	-Inf	0.246989	-Inf	GNPTAB	-	-
chr9:71775483-71775533:mpeak_203721|chr9_71736179_71869124_TJP2_NM_+|	78.2059	-4.05021	1.85463	-2.18383	0.0289746	0.365755	0	0	0	0	0	11.0596	102.756	88.8374	213.355	123.885	119.322	279.256	#DIV/0!	6.35049	-Inf	-0.367591	-Inf	TJP2	-	-
chr19:53603294-53603344:mpeak_101899|chr19_53573515_53606687_ZNF160_NM_-|	72.8211	-5.12954	1.74616	-2.93761	0.00330756	0.267856	0	0	0	0	1.05594	16.5895	137.471	123.738	177.796	133.896	124.601	158.706	#DIV/0!	6.34418	-Inf	0.0734848	-Inf	ZNF160	-	-
chr8:23291922-23292044:mpeak_192568|chr8_23290667_23315244_ENTPD4_NM_-|	114.185	-4.27381	1.68831	-2.53141	0.0113605	0.288014	1.3886	0	0	0	0	9.95368	298.548	303.528	285.246	203.973	153.112	114.467	0.469479	6.33251	-2.8416	0.912042	-3.75364	ENTPD4	-	-
chr21:46827128-46827178:mpeak_128020|chr21_46825051_46932101_COL18A1_NM_+|	97.9787	-3.61622	1.80415	-2.00439	0.0450283	0.435752	0	1.05759	0	0	0	12.1656	205.512	246.418	133.733	235.257	248.147	93.454	0.541739	6.32684	-3.52396	0.0218574	-3.54582	COL18A1	-	-
chr14:45425478-45425528:mpeak_60501|chr14_45398394_45431179_KLHL28_NM_-|	46.0108	-3.74781	1.79142	-2.09209	0.0364301	0.398639	0	0	0	0	1.05594	14.3775	41.6579	51.8218	75.7564	91.3497	89.7551	186.355	#DIV/0!	6.30007	-Inf	-1.11855	-Inf	KLHL28	-	-
chr10:101756573-101756623:mpeak_28586|chr10_101637093_101769676_DNMBP_NM_-|	30.4676	-4.30827	1.54715	-2.78465	0.00535859	0.267856	0	0	0	1.25137	4.22377	6.0828	69.4298	45.4763	55.6577	60.0656	32.7342	90.6891	#DIV/0!	6.29899	-Inf	-0.105381	-Inf	DNMBP	-	-
chr17:44227771-44227821:mpeak_86901|chr17_44109069_44302740_KANSL1_NM_-|	50.19	-3.57955	1.69033	-2.11766	0.0342037	0.387987	0	1.05759	0	0	1.05594	11.6126	73.5956	103.644	108.996	66.3224	96.0908	139.905	1.10845	6.28572	-3.5824	-0.078862	-3.50354	KANSL1	-	-
chr9:20713964-20714015:mpeak_202353|chr9_20658307_20995554_FOCAD_NM_+|	60.1607	-3.9001	1.71599	-2.2728	0.023038	0.338395	0	0	0.773024	0	2.11189	12.1656	77.7614	93.0678	194.802	106.366	61.2447	173.636	0.634265	6.27587	-4.20709	0.099572	-4.30666	FOCAD	-	-
chr2:236976033-236976083:mpeak_119724|chr2_236402732_237032562_AGAP1_NM_+|	94.6087	-4.60132	1.79888	-2.55787	0.0105314	0.28376	0	0	0	0	0	11.0596	149.968	150.178	295.295	157.672	126.713	244.418	#DIV/0!	6.27434	-Inf	0.171227	-Inf	AGAP1	-	-
chr5:68533828-68533878:mpeak_160567|chr5_68530621_68572933_CDK7_NM_+|	34.7983	-4.49674	1.66128	-2.7068	0.00679362	0.269946	0	0	0	1.25137	3.16783	8.84772	27.7719	46.5339	118.273	62.5683	49.6293	99.5368	#DIV/0!	6.26583	-Inf	-0.136809	-Inf	CDK7	-	-
chr8:128924784-128924834:mpeak_200052|chr8_128902873_129113225_PVT1_NR_+|	44.7922	-4.48249	1.63883	-2.73518	0.00623459	0.268895	0	0	0	1.25137	0	9.4007	95.8132	102.586	73.4373	87.5956	84.4754	82.9473	#DIV/0!	6.26547	-Inf	0.092138	-Inf	PVT1	-	-
chr12:54330851-54330910:mpeak_45742|chr12_54330153_54333427_HOXC13-AS_NR_-|	33.8337	-3.0451	1.52385	-1.9983	0.0456842	0.438559	0	1.05759	0	7.5082	2.11189	5.52982	37.4921	27.4973	82.7136	76.3333	72.8601	92.901	2.14807	6.25785	-3.84046	-0.712871	-3.12759	HOXC13-AS	-	-
chr14:103246284-103246424:mpeak_66280|chr14_103243815_103371549_TRAF3_NM_+|	83.4071	-5.01187	1.59908	-3.13421	0.00172316	0.267856	1.3886	0	0	3.7541	5.27971	17.1424	115.254	105.759	333.173	115.126	84.4754	219.534	0.751696	6.2453	-4.23656	0.402954	-4.63951	TRAF3	-	-
chr12:120294666-120294716:mpeak_51829|chr12_120126060_120315095_CIT_NM_-|	41.218	-3.50506	1.77351	-1.97634	0.0481161	0.449147	0	0	0	1.25137	0	12.7186	37.4921	40.1884	66.4801	81.3388	88.6992	166.448	#DIV/0!	6.22759	-Inf	-1.22287	-Inf	CIT	-	-
chr7:148827895-148827991:mpeak_190585|chr7_148823507_148875739_ZNF398_NM_+|	48.9759	-3.5653	1.58294	-2.25233	0.0243015	0.344556	0	1.05759	0	2.50273	0	9.4007	101.368	68.7432	117.5	100.109	90.8111	96.2189	1.10315	6.21829	-3.49253	0.00236538	-3.49489	ZNF398	-	-
chr1:180705773-180705823:mpeak_15903|chr1_180601145_180853141_XPR1_NM_+|	41.3077	-5.05295	1.58223	-3.19356	0.00140532	0.267856	0	0	0	1.25137	2.11189	9.4007	74.9842	63.4553	139.144	87.5956	59.1328	58.6161	#DIV/0!	6.21587	-Inf	0.434877	-Inf	XPR1	-	-
chr12:105551002-105551058:mpeak_50284|chr12_105501491_105560641_KIAA1033_NM_+|	41.9633	-4.74332	1.53143	-3.09732	0.00195282	0.267856	0	0	0	5.00546	3.16783	7.18877	51.3781	50.7642	138.371	85.0929	58.0769	104.514	#DIV/0!	6.2023	-Inf	-0.0423786	-Inf	KIAA1033	-	-
chr2:157390179-157390237:mpeak_113879|chr2_157291964_157439304_GPD2_NM_+|	146.851	-2.49478	1.10571	-2.25628	0.0240532	0.34276	8.33158	3.17277	0	23.776	10.5594	12.1656	218.01	188.251	548.074	247.77	163.671	338.425	1.80823	6.20123	-2.01508	0.347861	-2.36294	GPD2	-	-
chr18:74205439-74205502:mpeak_95663|chr18_74074512_74207146_ZNF516_NM_-|	41.1337	-4.11643	1.50011	-2.74408	0.00606803	0.268895	0	1.05759	0	1.25137	3.16783	7.74175	102.756	79.3191	102.039	60.0656	89.7551	46.4505	1.11672	6.19599	-3.52341	0.533624	-4.05703	ZNF516	-	-
chr3:38288376-38288426:mpeak_134238|chr3_38207025_38294307_OXSR1_NM_+|	100.938	-5.06894	1.71792	-2.95062	0.00317138	0.267856	0	0	0	0	0	8.29473	238.839	182.963	378.782	165.18	93.9789	143.222	#DIV/0!	6.18423	-Inf	0.992487	-Inf	OXSR1	-	-
chr4:119670699-119670749:mpeak_153421|chr4_119644810_119757326_SEC24D_NM_-|	49.0044	-5.08761	1.60592	-3.16802	0.00153479	0.267856	0	0	0	2.50273	3.16783	11.0596	74.9842	60.2825	163.881	71.3279	55.965	144.881	#DIV/0!	6.14687	-Inf	0.136328	-Inf	SEC24D	-	-
chr7:104986119-104986169:mpeak_187607|chr7_104758469_105029377_SRPK2_NM_-|	38.9479	-4.00286	1.76282	-2.27071	0.0231645	0.33911	0	0	0	0	1.05594	9.4007	41.6579	47.5915	112.088	83.8415	51.7412	119.997	#DIV/0!	6.13701	-Inf	-0.344156	-Inf	SRPK2	-	-
chr19:38815610-38815660:mpeak_99684|chr19_38810483_38817819_KCNK6_NM_+|	124.322	-5.07213	1.80536	-2.80949	0.00496203	0.267856	0	0	0	0	0	12.7186	333.263	287.664	234.999	307.836	136.217	179.166	#DIV/0!	6.12237	-Inf	0.457748	-Inf	KCNK6	-	-
chr3:17275572-17275622:mpeak_132929|chr3_17202748_17782399_TBC1D5_NM_-|	72.564	-4.21702	1.79783	-2.34562	0.0189953	0.315087	0	0	0	0	0	8.29473	86.093	118.45	251.233	108.869	98.2027	199.627	#DIV/0!	6.11859	-Inf	0.164366	-Inf	TBC1D5	-	-
chr3:33690278-33690328:mpeak_133909|chr3_33540209_33759705_CLASP2_NM_-|	37.8478	-4.81153	1.72857	-2.78354	0.00537692	0.267856	0	0	0	1.25137	4.22377	6.0828	45.8237	41.2459	166.2	31.2841	36.958	121.103	#DIV/0!	6.10416	-Inf	0.419656	-Inf	CLASP2	-	-
chr8:129068464-129068514:mpeak_200125|chr8_128902873_129113225_PVT1_NR_+|	45.1986	-4.98693	1.55995	-3.19686	0.00138934	0.267856	0	0	0	1.25137	2.11189	12.1656	95.8132	102.586	73.4373	87.5956	84.4754	82.9473	#DIV/0!	6.08931	-Inf	0.092138	-Inf	PVT1	-	-
chr14:67709019-67709075:mpeak_62910|chr14_67708011_67799496_MPP5_NM_+|	114.237	-4.6229	1.8482	-2.5013	0.0123737	0.29001	0	0	0	0	0	14.3775	166.632	181.905	295.295	186.454	180.566	345.614	#DIV/0!	6.05256	-Inf	-0.146476	-Inf	MPP5	-	-
chr1:175945745-175945795:mpeak_15335|chr1_175914306_176176380_RFWD2_NM_-|	49.1482	-4.4808	1.76772	-2.53478	0.0112517	0.287912	0	0	0	0	2.11189	9.4007	55.5439	49.7067	186.299	91.3497	54.909	140.457	#DIV/0!	6.02299	-Inf	0.0241163	-Inf	RFWD2	-	-
chr12:117415219-117415269:mpeak_51567|chr12_117348760_117465832_FBXW8_NM_+|	86.1077	-4.29726	1.76026	-2.44127	0.0146358	0.295211	0	0	0	0	0	10.5067	127.751	178.732	191.71	143.907	135.161	245.524	#DIV/0!	6.00848	-Inf	-0.07449	-Inf	FBXW8	-	-
chr8:133004726-133004776:mpeak_200366|chr8_132916355_133023036_EFR3A_NM_+|	80.1061	-4.36882	1.69407	-2.57888	0.009912	0.280654	0	0	0	0	0	8.84772	140.248	153.35	215.674	155.169	130.937	157.047	#DIV/0!	5.98961	-Inf	0.200631	-Inf	EFR3A	-	-
chr6:90373856-90373906:mpeak_175448|chr6_90353912_90529513_MDN1_NM_-|	36.3507	-3.64866	1.83602	-1.98727	0.0468925	0.443475	0	0	0	0	1.05594	9.4007	43.0465	28.5549	91.9899	61.3169	44.3496	156.494	#DIV/0!	5.98296	-Inf	-0.680355	-Inf	MDN1	-	-
chr6:53763435-53763485:mpeak_173649|chr6_53659777_53787432_LRRC1_NM_+|	79.616	-3.48343	1.66292	-2.09476	0.036192	0.397302	0	1.05759	0	0	0	8.29473	152.746	143.832	233.453	153.918	117.21	144.881	0.5986	5.98165	-2.97142	0.349462	-3.32088	LRRC1	-	-
chr4:37939655-37939705:mpeak_148255|chr4_37892704_38138755_TBC1D1_NM_+|	85.3366	-4.42027	1.79787	-2.45862	0.0139474	0.293546	0	0	0	0	0	9.4007	106.922	138.544	297.614	120.131	134.105	217.322	#DIV/0!	5.98062	-Inf	0.203731	-Inf	TBC1D1	-	-
chr5:112886314-112886364:mpeak_163859|chr5_112849390_112929178_YTHDC2_NM_+|	45.6729	-3.24237	1.43341	-2.262	0.0236973	0.341062	0	2.11518	0	3.7541	1.05594	8.84772	72.207	78.2615	153.059	75.082	59.1328	94.56	2.0906	5.96996	-2.69087	0.407899	-3.09877	YTHDC2	-	-
chr3:179044096-179044148:mpeak_144458|chr3_179040778_179051056_ZNF639_NM_+|	47.5951	-3.69812	1.74626	-2.11773	0.0341978	0.387987	1.3886	0	0	0	1.05594	8.29473	63.8754	78.2615	182.434	92.6011	34.8461	108.385	1.28348	5.94747	-2.75144	0.460775	-3.21222	ZNF639	-	-
chr13:96776322-96776379:mpeak_57805|chr13_96743092_97484743_HS6ST3_NM_+|	49.0029	-3.66443	1.6314	-2.24618	0.0246922	0.346463	0	1.05759	0	0	1.05594	9.4007	86.093	88.8374	137.598	92.6011	70.7482	100.643	1.01519	5.94145	-3.30557	0.243494	-3.54906	HS6ST3	-	-
chr2:159965080-159965136:mpeak_114058|chr2_159825145_160086088_TANC1_NM_+|	40.6699	-4.62812	1.73303	-2.67054	0.00757302	0.272549	0	0	0	1.25137	7.3916	5.52982	30.5491	44.4187	160.016	50.0546	41.1818	147.646	#DIV/0!	5.93295	-Inf	-0.0237408	-Inf	TANC1	-	-
chr3:141781020-141781070:mpeak_141643|chr3_141671538_141868386_TFDP2_NM_-|	52.8394	-4.66841	1.66143	-2.80988	0.00495606	0.267856	0	0	0	0	1.05594	10.5067	93.036	90.9526	144.555	91.3497	100.315	102.302	#DIV/0!	5.89997	-Inf	0.160438	-Inf	TFDP2	-	-
chr3:15732458-15732509:mpeak_132775|chr3_15712063_15901053_ANKRD28_NM_-|	80.7865	-4.41917	1.75274	-2.52128	0.0116928	0.288223	0	0	0	0	0	8.29473	109.699	136.429	292.976	131.393	121.433	169.213	#DIV/0!	5.89618	-Inf	0.353186	-Inf	ANKRD28	-	-
chr11:33343127-33343219:mpeak_33476|chr11_33278217_33374637_HIPK3_NM_+|	99.4475	-3.26467	1.31809	-2.47681	0.0132562	0.292246	1.3886	0	2.31907	0	3.16783	8.84772	223.564	211.518	435.213	120.131	51.7412	135.481	0.639037	5.86404	-1.69632	1.50161	-3.19792	HIPK3	-	-
chr10:121618424-121618483:mpeak_30336|chr10_121591112_121633140_MCMBP_NM_-|	52.6297	-4.20224	1.79449	-2.34174	0.0191941	0.315708	0	0	0	0	1.05594	13.2716	59.7096	51.8218	137.598	117.628	82.3635	168.107	#DIV/0!	5.83846	-Inf	-0.563195	-Inf	MCMBP	-	-
chr3:191088660-191088801:mpeak_145389|chr3_191046873_191109529_CCDC50_NM_+|	61.7493	-5.08131	1.55377	-3.27031	0.0010743	0.267856	0	0	0	3.7541	2.11189	17.6954	123.585	113.162	76.5294	141.404	138.329	124.421	#DIV/0!	5.82981	-Inf	-0.367468	-Inf	CCDC50	-	-
chr8:80938586-80938636:mpeak_195547|chr8_80831383_80942506_MRPS28_NM_-|	41.0658	-3.78281	1.63488	-2.31382	0.0206778	0.325466	1.3886	0	0	2.50273	2.11189	8.84772	40.2693	46.5339	160.016	78.8361	53.8531	98.4308	1.68779	5.82482	-3.27723	0.0948124	-3.37204	MRPS28	-	-
chr19:53173143-53173193:mpeak_101772|chr19_53118050_53193834_ZNF83_NM_-|	31.2239	-4.19848	1.6015	-2.62158	0.00875224	0.275065	0	0	0	1.25137	1.05594	9.4007	44.4351	53.937	63.388	66.3224	82.3635	52.5333	#DIV/0!	5.81853	-Inf	-0.314913	-Inf	ZNF83	-	-
chr22:34279871-34279938:mpeak_129981|chr22_33670610_34316416_LARGE_NM_-|	58.3598	-2.28999	1.06486	-2.15051	0.0315146	0.377618	1.3886	4.23035	0	1.25137	6.33566	7.74175	143.025	129.026	143.009	101.361	85.5314	77.4175	2.03065	5.79955	-1.44787	0.651094	-2.09896	LARGE	-	-
chr4:151381044-151381094:mpeak_155211|chr4_151186964_151936649_LRBA_NM_-|	104.796	-3.86617	1.68166	-2.29902	0.021504	0.329809	0	1.05759	0	0	0	9.95368	222.175	253.821	255.098	153.918	142.552	218.981	0.433975	5.79318	-3.23445	0.504222	-3.73867	LRBA	-	-
chr5:52400088-52400138:mpeak_159294|chr5_52394497_52405602_MOCS2_NM_-|	58.627	-3.59826	1.6816	-2.13978	0.0323725	0.380944	1.3886	0	0	0	1.05594	13.2716	98.5903	92.0102	126.003	132.645	100.315	138.246	1.31578	5.7896	-3.36709	-0.229539	-3.13755	MOCS2	-	-
chr7:108047644-108047694:mpeak_187974|chr7_107790592_108096841_NRCAM_NM_-mpeak_187974|chr7_107790592_108096841_NRCAM_NM_-||	62.5256	-3.61818	1.69263	-2.1376	0.032549	0.382347	0	0	0	0	0	8.29473	122.196	106.816	82.7136	153.918	119.322	157.047	#DIV/0!	5.78317	-Inf	-0.465017	-Inf	NRCAM	-	-
chr22:32026356-32026406:mpeak_129743|chr22_32015822_32026810_PISD_NM_-|	102.102	-4.81491	1.97333	-2.43999	0.0146875	0.295412	0	0	0	0	0	8.84772	99.9789	143.832	512.515	102.612	65.4685	291.975	#DIV/0!	5.76956	-Inf	0.717201	-Inf	PISD	-	-
chr22:29325129-29325183:mpeak_129341|chr22_29279754_29449566_ZNRF3_NM_+mpeak_129341|chr22_29279754_29449566_ZNRF3_NM_+||	68.3038	-5.26638	1.92276	-2.73897	0.00616322	0.268895	0	0	0	1.25137	0	9.4007	47.2123	84.6071	399.653	90.0984	47.5174	139.905	#DIV/0!	5.75745	-Inf	0.937403	-Inf	ZNRF3	-	-
chr1:246902545-246902595:mpeak_20631|chr1_246887377_246930496_SCCPDH_NM_+|	73.7029	-3.97446	1.83453	-2.16647	0.030275	0.372132	0	0	0	0	0	8.84772	77.7614	87.7798	248.914	112.623	125.657	222.852	#DIV/0!	5.75608	-Inf	-0.153964	-Inf	SCCPDH	-	-
chr2:11446550-11446600:mpeak_103368|chr2_11323566_11484711_ROCK2_NM_-|	57.939	-2.97609	1.41217	-2.10746	0.0350773	0.391817	1.3886	1.05759	0	0	3.16783	8.29473	151.357	132.199	98.9471	133.896	89.7551	75.2056	0.959282	5.7532	-2.22832	0.356015	-2.58434	ROCK2	-	-
chr17:3947619-3947672:mpeak_82374|chr17_3910264_4046253_ZZEF1_NM_-|	44.8243	-3.23105	1.56373	-2.06625	0.0388049	0.410728	1.3886	0	0	3.7541	0	6.63579	55.5439	93.0678	105.904	88.847	64.4125	118.338	1.63675	5.7382	-2.90348	-0.0937153	-2.80977	ZZEF1	-	-
chr15:51845193-51845283:mpeak_68946|chr15_51741390_51914967_DMXL2_NM_-|	53.7724	-2.55872	1.10114	-2.3237	0.0201415	0.321426	2.77719	1.05759	0	5.00546	6.33566	6.0828	91.6474	122.68	105.904	100.109	89.7551	113.914	1.79625	5.73573	-2.18385	0.0760961	-2.25995	DMXL2	-	-
chr6:143479871-143479927:mpeak_178499|chr6_143380499_143660775_AIG1_NM_+|	59.5262	-4.18501	1.4383	-2.90968	0.00361793	0.267856	0	1.05759	0	3.7541	11.6154	3.31789	104.145	121.623	142.236	97.6065	104.538	124.421	0.862155	5.72239	-4.14321	0.172347	-4.31556	AIG1	-	-
chr9:71797293-71797347:mpeak_203723|chr9_71736179_71869124_TJP2_NM_+|	78.1137	-3.91551	1.83245	-2.13676	0.0326178	0.382872	0	0	0	0	0	9.95368	102.756	88.8374	213.355	123.885	119.322	279.256	#DIV/0!	5.71544	-Inf	-0.367591	-Inf	TJP2	-	-
chr15:89020275-89020325:mpeak_72929|chr15_89010683_89021102_MRPS11_NM_+|	70.6792	-3.71284	1.75559	-2.11487	0.0344409	0.389291	0	0	0	0	0	9.4007	104.145	77.204	163.881	167.683	125.657	200.18	#DIV/0!	5.71448	-Inf	-0.515551	-Inf	MRPS11	-	-
chr9:37941975-37942027:mpeak_203346|chr9_37920001_38069210_SHB_NM_-|	51.206	-3.19564	1.33319	-2.39699	0.0165303	0.305514	1.3886	1.05759	0	2.50273	5.27971	8.29473	88.8702	79.3191	146.102	123.885	89.7551	68.0168	1.16748	5.70807	-2.71641	0.15816	-2.87457	SHB	-	-
chr3:133356422-133356472:mpeak_140824|chr3_133320237_133380737_TOPBP1_NM_-|	67.5184	-3.8008	1.75439	-2.16645	0.0302769	0.372132	0	0	0	0	0	8.29473	86.093	85.6647	192.483	128.891	123.545	185.249	#DIV/0!	5.68541	-Inf	-0.265001	-Inf	TOPBP1	-	-
chr8:38145786-38145905:mpeak_193409|chr8_38133400_38239790_WHSC1L1_NM_-|	66.897	-2.4181	1.04147	-2.32181	0.0202432	0.321921	1.3886	3.17277	0	10.0109	5.27971	6.0828	122.196	104.701	173.93	128.891	118.266	128.845	1.70698	5.68441	-2.22828	0.0922467	-2.32053	WHSC1L1	-	-
chr7:21958876-21958926:mpeak_182360|chr7_21941970_21985542_CDCA7L_NM_-|	75.3227	-4.01056	1.77824	-2.25535	0.0241116	0.343063	0	0	0	0	0	8.84772	72.207	125.853	228.815	152.667	134.105	181.378	#DIV/0!	5.6698	-Inf	-0.133155	-Inf	CDCA7L	-	-
chr12:46136571-46136621:mpeak_44159|chr12_46123619_46298716_ARID2_NM_+|	81.2514	-4.21679	1.78397	-2.3637	0.0180933	0.313389	0	0	0	0	0	8.84772	124.974	117.392	253.552	118.88	111.93	239.441	#DIV/0!	5.64446	-Inf	0.0766701	-Inf	ARID2	-	-
chr11:46501629-46501738:mpeak_34168|chr11_46419493_46615619_AMBRA1_NM_-|	59.8745	-3.38368	1.37412	-2.46244	0.0137995	0.293236	0	2.11518	0	2.50273	7.3916	8.84772	149.968	151.235	64.161	138.902	120.377	72.9937	1.73677	5.64056	-3.14743	0.136969	-3.2844	AMBRA1	-	-
chr2:71599658-71599792:mpeak_108326|chr2_71558884_71661871_ZNF638_NM_+|	61.5362	-3.84311	1.50965	-2.54569	0.0109062	0.286712	1.3886	0	0	0	5.27971	7.18877	97.2018	115.277	180.115	122.634	86.5873	122.762	1.06109	5.63364	-3.16659	0.241926	-3.40851	ZNF638	-	-
chr3:142747766-142747816:mpeak_141862|chr3_142720371_142775153_U2SURP_NM_+|	98.5195	-4.41701	1.78251	-2.47797	0.0132131	0.292246	0	0	0	0	0	11.0596	131.917	167.099	282.927	227.749	143.608	217.875	#DIV/0!	5.63088	-Inf	-0.017959	-Inf	U2SURP	-	-
chr13:37575070-37575124:mpeak_55080|chr13_37574677_37583320_EXOSC8_NM_+|	72.2936	-2.90349	1.32161	-2.19693	0.0280256	0.363459	2.77719	1.05759	0	5.00546	12.6713	4.97684	81.9272	90.9526	265.147	123.885	72.8601	206.262	1.3132	5.62114	-2.56253	0.120213	-2.68274	EXOSC8	-	-
chr11:65299683-65299733:mpeak_35594|chr11_65292547_65305912_SCYL1_NM_+|	105.152	-4.48766	1.85766	-2.41577	0.0157021	0.300375	0	0	0	0	0	11.6126	152.746	151.235	322.351	200.219	103.482	320.177	#DIV/0!	5.58409	-Inf	0.00566388	-Inf	SCYL1	-	-
chr1:10419168-10419215:mpeak_906|chr1_10270763_10436602_KIF1B_NM_+|	91.2569	-4.34806	1.73024	-2.51299	0.0119714	0.289771	0	0	0	0	0	9.95368	215.232	184.02	150.74	192.71	125.657	216.769	#DIV/0!	5.58008	-Inf	0.0395048	-Inf	KIF1B	-	-
chr10:3202267-3202317:mpeak_21053|chr10_3180316_3215033_PITRM1_NM_-|	97.9041	-4.46238	1.72307	-2.58978	0.00960377	0.279067	0	0	0	0	0	10.5067	206.901	188.251	203.305	163.929	164.727	237.229	#DIV/0!	5.57003	-Inf	0.0807375	-Inf	PITRM1	-	-
chr13:98646709-98646759:mpeak_57934|chr13_98605928_98673989_IPO5_NM_+|	112.261	-3.57966	1.7654	-2.02767	0.0425936	0.427191	1.3886	0	0	0	0	12.7186	222.175	191.423	234.226	206.475	155.224	323.495	0.643042	5.56861	-3.19524	-0.0809071	-3.11433	IPO5	-	-
chr17:9051905-9051955:mpeak_83203|chr17_8924858_9142956_NTN1_NM_+|	78.9386	-4.20965	1.71548	-2.45392	0.0141308	0.293619	0	0	0	0	0	8.29473	216.621	152.293	122.138	193.962	148.888	105.067	#DIV/0!	5.55555	-Inf	0.132645	-Inf	NTN1	-	-
chr1:35760724-35760958:mpeak_3336|chr1_35734567_35885070_ZMYM4_NM_+|	70.1511	-2.61621	1.19421	-2.19076	0.0284695	0.3645	2.77719	2.11518	0	1.25137	7.3916	11.6126	112.476	111.047	227.269	110.12	99.2586	156.494	1.62792	5.53624	-2.04971	0.30112	-2.35084	ZMYM4	-	-
chr3:172376189-172376239:mpeak_144000|chr3_172351882_172429008_NCEH1_NM_-|	37.7851	-3.86792	1.69176	-2.28632	0.0222355	0.334064	0	0	0	1.25137	0	7.74175	43.0465	48.6491	108.996	80.0874	70.7482	92.901	#DIV/0!	5.53453	-Inf	-0.28034	-Inf	NCEH1	-	-
chr5:64180047-64180097:mpeak_160034|chr5_64064744_64313985_CWC27_NM_+|	55.1976	-4.10871	1.71546	-2.39511	0.0166154	0.306117	0	0	0	0	1.05594	13.8246	72.207	93.0678	78.8485	160.175	130.937	112.255	#DIV/0!	5.53361	-Inf	-0.724484	-Inf	CWC27	-	-
chr12:76927131-76927181:mpeak_48209|chr12_76749801_76953589_OSBPL8_NM_-|	83.4187	-4.96236	1.60882	-3.08448	0.00203912	0.267856	1.3886	0	0	2.50273	4.22377	14.3775	108.311	106.816	381.874	116.377	99.2586	165.895	0.697786	5.53142	-3.92582	0.645935	-4.57176	OSBPL8	-	-
chr6:7391491-7391549:mpeak_169468|chr6_7390061_7417563_RIOK1_NM_+|	37.3948	-4.08539	1.66998	-2.44638	0.0144299	0.293828	0	0	0	1.25137	1.05594	12.7186	47.2123	40.1884	74.2103	88.847	65.4685	117.785	#DIV/0!	5.52218	-Inf	-0.751616	-Inf	RIOK1	-	-
chr4:68537413-68537542:mpeak_149939|chr4_68484850_68566889_UBA6_NM_-|	92.0045	-2.4987	0.986286	-2.53344	0.0112949	0.288014	1.3886	5.28794	0	7.5082	6.33566	10.5067	193.015	154.408	283.7	165.18	135.161	141.563	1.58682	5.51036	-1.86678	0.514186	-2.38097	UBA6	-	-
chr11:75779918-75779986:mpeak_37311|chr11_75526211_75851754_UVRAG_NM_+|	90.341	-4.36478	1.74926	-2.49522	0.012588	0.290421	0	0	0	0	0	9.4007	134.694	156.523	271.331	140.153	143.608	228.382	#DIV/0!	5.50668	-Inf	0.135431	-Inf	UVRAG	-	-
chr1:161834672-161834722:mpeak_14103|chr1_161736033_161928235_ATF6_NM_+|	96.6294	-4.26464	1.87056	-2.27987	0.0226152	0.335697	0	0	0	0	0	11.0596	145.803	114.22	284.473	170.186	99.2586	334.554	#DIV/0!	5.49321	-Inf	-0.149626	-Inf	ATF6	-	-
chr19:12397009-12397144:mpeak_97240|chr19_12384878_12405714_ZNF44_NM_-|	45.972	-3.47347	1.6107	-2.1565	0.0310448	0.375357	0	1.05759	0	1.25137	0	7.74175	102.756	125.853	67.2531	68.8251	93.9789	82.9473	1.07238	5.48916	-3.08804	0.267726	-3.35577	ZNF44	-	-
chr17:57081467-57081517:mpeak_88232|chr17_57060282_57184266_TRIM37_NM_-|	61.8204	-4.86279	1.66891	-2.91375	0.00357121	0.267856	0	0	0	0	3.16783	8.29473	74.9842	96.2405	245.822	97.6065	68.6363	147.093	#DIV/0!	5.48735	-Inf	0.412497	-Inf	TRIM37	-	-
chr3:37216215-37216266:mpeak_134093|chr3_37095452_37217851_LRRFIP2_NM_-|	80.8047	-3.87918	1.62508	-2.38707	0.0169832	0.307922	2.77719	0	0	1.25137	1.05594	18.8014	133.305	150.178	277.516	110.12	85.5314	189.12	1.48513	5.48604	-2.92614	0.543995	-3.47013	LRRFIP2	-	-
chr7:123368401-123368451:mpeak_188572|chr7_123324634_123389125_WASL_NM_-|	70.2368	-3.68613	1.7371	-2.122	0.0338377	0.387244	0	0	0	0	0	8.84772	77.7614	123.738	148.421	121.383	153.112	209.58	#DIV/0!	5.48328	-Inf	-0.468205	-Inf	WASL	-	-
chr3:193379872-193379922:mpeak_145488|chr3_193310932_193412394_OPA1_NM_+|	77.2578	-3.98607	1.77184	-2.24968	0.0244695	0.345145	0	0	0	0	0	8.84772	102.756	104.701	226.496	150.164	114.042	220.087	#DIV/0!	5.48081	-Inf	-0.158339	-Inf	OPA1	-	-
chr4:26980969-26981019:mpeak_148025|chr4_26862312_27024140_STIM2_NM_+|	99.9892	-4.70638	1.67942	-2.80239	0.00507263	0.267856	0	0	0	0	0	8.84772	272.165	207.287	224.95	195.213	152.056	139.352	#DIV/0!	5.45459	-Inf	0.533603	-Inf	STIM2	-	-
chr2:171926983-171927033:mpeak_115040|chr2_171850466_172087824_TLK1_NM_-|	76.9652	-5.13063	1.61461	-3.17762	0.00148488	0.267856	0	0	0	0	2.11189	12.7186	158.3	160.753	180.888	156.421	123.545	128.845	#DIV/0!	5.44157	-Inf	0.290324	-Inf	TLK1	-	-
chr8:11159213-11159263:mpeak_191861|chr8_11141999_11180133_MTMR9_NM_+|	75.3597	-5.21657	1.51254	-3.44889	0.000562899	0.267856	0	0	0	0	4.22377	8.84772	204.124	154.408	172.384	148.913	112.986	98.4308	#DIV/0!	5.44148	-Inf	0.559168	-Inf	MTMR9	-	-
chr22:41998163-41998232:mpeak_130732|chr22_41997194_42017061_DESI1_NM_-|	100.6	-4.29398	1.75373	-2.44849	0.0143458	0.293828	0	0	0	0	0	11.6126	188.849	176.617	188.618	230.251	155.224	256.031	#DIV/0!	5.43064	-Inf	-0.211357	-Inf	DESI1	-	-
chr5:14296923-14296973:mpeak_157770|chr5_14143828_14507988_TRIO_NM_+|	53.9687	-3.9466	1.46981	-2.6851	0.00725078	0.270379	0	1.05759	0	3.7541	3.16783	11.0596	91.6474	95.183	110.542	102.612	77.0838	151.517	1.06693	5.42901	-4.08767	-0.155487	-3.93218	TRIO	-	-
chr1:25557007-25557064:mpeak_2284|chr1_25549922_25559013_SYF2_NM_-|	87.6365	-4.35014	1.67568	-2.59604	0.0094305	0.277708	0	0	0	0	0	8.84772	205.512	157.581	190.164	172.689	152.056	164.789	#DIV/0!	5.42214	-Inf	0.176543	-Inf	SYF2	-	-
chr21:45505059-45505109:mpeak_127840|chr21_45432205_45523173_TRAPPC10_NM_+|	77.5376	-3.94367	1.80619	-2.18342	0.0290046	0.365755	0	0	0	0	0	8.84772	119.419	101.528	209.49	128.891	91.867	270.408	#DIV/0!	5.40411	-Inf	-0.190408	-Inf	TRAPPC10	-	-
chr1:24112046-24112096:mpeak_2140|chr1_24104875_24113764_PITHD1_NM_+|	93.8923	-4.47857	1.82962	-2.44781	0.0143729	0.293828	0	0	0	0	0	8.84772	145.803	124.795	355.591	208.978	79.1957	203.497	#DIV/0!	5.39856	-Inf	0.348904	-Inf	PITHD1	-	-
chr11:33357077-33357264:mpeak_33482|chr11_33278217_33374637_HIPK3_NM_+|	99.7504	-4.51278	1.3788	-3.27298	0.00106421	0.267856	2.77719	0	0	2.50273	6.33566	7.74175	223.564	211.518	435.213	120.131	51.7412	135.481	0.957329	5.39449	-2.57776	1.50161	-4.07936	HIPK3	-	-
chr11:128913886-128913936:mpeak_40501|chr11_128841054_129062093_ARHGAP32_NM_-|	75.5861	-3.73477	1.78271	-2.095	0.036171	0.397168	0	0	0	0	0	9.4007	95.8132	97.2981	180.888	132.645	127.769	263.22	#DIV/0!	5.38585	-Inf	-0.485523	-Inf	ARHGAP32	-	-
chr17:35453420-35453487:mpeak_85677|chr17_35444374_35766902_ACACA_NM_-|	65.0576	-3.54131	1.57201	-2.25273	0.0242765	0.34431	1.3886	1.05759	0	1.25137	1.05594	15.4835	86.093	130.083	212.582	83.8415	79.1957	168.66	0.855792	5.36358	-2.86253	0.370298	-3.23283	ACACA	-	-
chr17:65850998-65851048:mpeak_90542|chr17_65821779_65978367_BPTF_NM_+|	97.1034	-4.54181	1.8301	-2.48173	0.0130748	0.291654	0	0	0	0	0	8.84772	112.476	145.947	401.973	118.88	140.44	236.676	#DIV/0!	5.35148	-Inf	0.413001	-Inf	BPTF	-	-
chr8:38064979-38065029:mpeak_193369|chr8_38034105_38067525_BAG4_NM_+|	100.737	-4.34166	1.73669	-2.49996	0.0124206	0.290215	0	0	0	0	0	11.0596	226.341	192.481	158.47	244.016	189.014	187.461	#DIV/0!	5.34721	-Inf	-0.104109	-Inf	BAG4	-	-
chr7:138230397-138230447:mpeak_189763|chr7_138145078_138269486_TRIM24_NM_+|	50.7389	-3.6443	1.66915	-2.18333	0.0290115	0.365755	1.3886	0	0	1.25137	0	7.74175	149.968	127.968	68.0261	128.891	63.3566	60.2751	1.20412	5.34197	-2.69519	0.454206	-3.1494	TRIM24	-	-
chr5:60631876-60631927:mpeak_159847|chr5_60628099_60839281_ZSWIM6_NM_+|	56.5398	-3.80661	1.69624	-2.24414	0.0248235	0.346696	0	1.05759	0	0	1.05594	8.84772	105.533	90.9526	192.483	73.8306	55.965	148.752	0.815686	5.33319	-3.22718	0.48173	-3.70891	ZSWIM6	-	-
chr2:236678026-236678076:mpeak_119679|chr2_236402732_237032562_AGAP1_NM_+|	94.4704	-4.39683	1.76229	-2.49494	0.0125977	0.290456	0	0	0	0	0	9.4007	149.968	150.178	295.295	157.672	126.713	244.418	#DIV/0!	5.33319	-Inf	0.171227	-Inf	AGAP1	-	-
chr17:48220480-48220556:mpeak_87414|chr17_48212749_48227878_PPP1R9B_NM_-|	76.7728	-2.50554	1.00532	-2.49228	0.0126927	0.291257	0	2.11518	1.54605	11.2623	6.33566	6.63579	123.585	167.099	147.648	171.437	129.881	153.729	1.2529	5.32554	-2.72662	-0.0539933	-2.67263	PPP1R9B	-	-
chr5:16711011-16711061:mpeak_157953|chr5_16666902_16936385_MYO10_NM_-|	109.23	-4.46001	1.83753	-2.42718	0.0152167	0.299	0	0	0	0	0	11.6126	148.58	168.157	326.989	172.689	140.44	342.296	#DIV/0!	5.31531	-Inf	-0.0259848	-Inf	MYO10	-	-
chr10:93621186-93621331:mpeak_27699|chr10_93558150_93622693_TNKS2_NM_+|	87.0285	-3.2381	1.34119	-2.41435	0.0157633	0.300524	2.77719	1.05759	0	2.50273	3.16783	19.3544	137.471	127.968	279.062	148.913	135.161	186.908	1.05641	5.31336	-2.70615	0.209265	-2.91542	TNKS2	-	-
chr4:53964890-53964940:mpeak_149488|chr4_53740228_54232242_SCFD2_NM_-|	40.2386	-3.48872	1.53304	-2.27568	0.0228651	0.337434	0	1.05759	0	1.25137	4.22377	7.74175	51.3781	59.225	108.996	85.0929	53.8531	110.043	1.4448	5.30821	-3.64353	-0.18121	-3.46232	SCFD2	-	-
chr13:46090920-46090970:mpeak_55905|chr13_46039029_46108836_COG3_NM_+|	37.3409	-3.48455	1.6259	-2.14315	0.032101	0.380814	0	1.05759	0	1.25137	1.05594	9.4007	69.4298	53.937	90.4438	56.3115	49.6293	115.573	1.48391	5.28545	-3.46865	-0.0510647	-3.41758	COG3	-	-
chr8:15570855-15570905:mpeak_192000|chr8_15397595_15621711_TUSC3_NM_+|	71.3114	-3.58674	1.81835	-1.97253	0.0485494	0.450593	0	0	0	0	0	8.84772	73.5956	75.0888	195.575	141.404	114.042	247.183	#DIV/0!	5.28086	-Inf	-0.545998	-Inf	TUSC3	-	-
chr2:219417805-219417855:mpeak_118471|chr2_219319740_219433084_USP37_NM_-|	51.8613	-4.4147	1.73659	-2.54216	0.0110169	0.286729	0	0	0	0	1.05594	9.4007	73.5956	71.916	166.973	123.885	53.8531	121.656	#DIV/0!	5.2389	-Inf	0.0617388	-Inf	USP37	-	-
chr6:150166294-150166344:mpeak_179167|chr6_150141839_150185480_LRP11_NM_-|	166.781	-4.36858	1.74696	-2.50068	0.0123956	0.290215	1.3886	0	0	0	0	13.8246	326.32	441.014	426.709	282.809	233.363	275.938	0.348881	5.23585	-3.31553	0.592083	-3.90762	LRP11	-	-
chr5:34931695-34931745:mpeak_158447|chr5_34929697_34954657_DNAJC21_NM_+|	73.083	-4.663	1.68244	-2.77157	0.00557869	0.267856	0	0	0	0	2.11189	14.3775	101.368	94.1254	189.391	146.41	159.447	169.766	#DIV/0!	5.20037	-Inf	-0.305395	-Inf	DNAJC21	-	-
chr18:24115555-24115605:mpeak_93765|chr18_24035865_24237365_KCTD1_NM_-|	34.3611	-4.32939	1.86197	-2.32517	0.0200631	0.321117	0	0	0	1.25137	1.05594	7.74175	31.9377	26.4397	149.194	33.7869	34.8461	126.08	#DIV/0!	5.16096	-Inf	0.0922565	-Inf	KCTD1	-	-
chr8:99527327-99527393:mpeak_197164|chr8_99468228_99954799_STK3_NM_-|	63.8212	-2.75846	1.22235	-2.25669	0.0240276	0.342736	4.16579	0	0	8.75956	1.05594	6.63579	133.305	126.911	166.2	108.869	85.5314	124.421	2.93079	5.16004	-1.98154	0.419514	-2.40105	STK3	-	-
chr9:103104848-103104898:mpeak_206373|chr9_103064586_103115259_TEX10_NM_-|	77.4376	-3.65567	1.83381	-1.99348	0.0462084	0.440752	0	0	0	0	0	9.4007	86.093	95.183	191.71	152.667	95.0349	299.163	#DIV/0!	5.15705	-Inf	-0.552063	-Inf	TEX10	-	-
chr14:64627012-64627062:mpeak_62512|chr14_64319682_64692036_SYNE2_NM_+|	78.8479	-3.97296	1.77978	-2.23228	0.0255963	0.351297	0	0	0	0	0	8.29473	172.186	204.115	78.8485	201.47	191.126	90.1361	#DIV/0!	5.15487	-Inf	-0.0848827	-Inf	SYNE2	-	-
chr10:43113473-43113604:mpeak_24317|chr10_43070126_43134285_ZNF33B_NR_-mpeak_24317|chr10_43090147_43134285_ZNF33B_NM_-||	65.8828	-2.96627	1.45108	-2.04419	0.040935	0.419713	0	1.05759	0.773024	0	6.33566	5.52982	180.518	188.251	62.6149	112.623	149.944	82.9473	0.636538	5.15123	-2.69637	0.320225	-3.0166	ZNF33B	-	-
chr17:12839077-12839127:mpeak_83380|chr17_12692828_12893348_ARHGAP44_NM_+|	45.7647	-2.62872	1.33196	-1.97358	0.0484298	0.450275	1.3886	1.05759	0	3.7541	3.16783	8.29473	65.264	100.471	70.3452	87.5956	71.8041	136.034	1.55425	5.15062	-2.63705	-0.323556	-2.31349	ARHGAP44	-	-
chr3:72892578-72892632:mpeak_137321|chr3_72799987_72897598_SHQ1_NM_-|	42.9783	-4.69722	1.6974	-2.76731	0.00565213	0.267856	0	0	0	1.25137	1.05594	9.95368	61.0982	56.0522	147.648	73.8306	45.4055	119.444	#DIV/0!	5.13699	-Inf	0.149813	-Inf	SHQ1	-	-
chrX:70765919-70765969:mpeak_212872|chrX_70752911_70793469_OGT_NM_+|	55.9459	-4.60231	1.72622	-2.66612	0.0076733	0.27295	0	0	0	1.25137	0	8.84772	76.3728	99.4133	190.164	71.3279	69.6922	154.282	#DIV/0!	5.12987	-Inf	0.309455	-Inf	OGT	-	-
chr2:103251793-103251843:mpeak_110446|chr2_103236147_103324577_SLC9A2_NM_+|	69.5496	-5.02836	1.59725	-3.14814	0.00164315	0.267856	0	0	0	0	2.11189	9.4007	151.357	154.408	180.115	127.639	140.44	69.1228	#DIV/0!	5.12122	-Inf	0.526983	-Inf	SLC9A2	-	-
chr9:99115653-99115704:mpeak_205837|chr9_99077181_99145992_SLC35D2_NR_-mpeak_205837|chr9_99083623_99145992_SLC35D2_NM_-||	57.9908	-4.09552	1.67515	-2.44486	0.0144907	0.293974	1.3886	0	0	3.7541	3.16783	9.4007	37.4921	78.2615	243.503	83.8415	57.0209	178.06	1.15956	5.11805	-3.55517	0.171806	-3.72698	SLC35D2	-	-
chr5:179699168-179699218:mpeak_168808|chr5_179663531_179719071_MAPK9_NM_-|	84.8645	-4.00971	1.98999	-2.01493	0.0439116	0.43278	0	0	0	0	0	8.84772	61.0982	72.9736	355.591	130.142	84.4754	305.246	#DIV/0!	5.10579	-Inf	-0.0863445	-Inf	MAPK9	-	-
chr1:175141260-175141316:mpeak_15309|chr1_175130282_175162229_KIAA0040_NM_-|	35.1399	-4.41242	1.54579	-2.85448	0.00431073	0.267856	0	0	0	1.25137	2.11189	6.63579	62.4868	49.7067	103.585	73.8306	49.6293	72.4407	#DIV/0!	5.10414	-Inf	0.139431	-Inf	KIAA0040	-	-
chr9:2042367-2042417:mpeak_201482|chr9_2015218_2192703_SMARCA2_NM_+|	98.6478	-4.49013	1.72212	-2.60733	0.00912521	0.277333	0	0	0	0	0	8.84772	148.58	191.423	314.621	171.437	141.496	207.368	#DIV/0!	5.10149	-Inf	0.331318	-Inf	SMARCA2	-	-
chr6:111002776-111002826:mpeak_176481|chr6_110935869_111137088_CDK19_NM_-|	140.199	-4.96161	1.78572	-2.7785	0.00546105	0.267856	0	0	0	0	0	12.1656	211.067	266.512	473.091	217.738	239.699	262.114	#DIV/0!	5.07217	-Inf	0.401849	-Inf	CDK19	-	-
chr10:127550064-127550114:mpeak_30834|chr10_127525424_127569884_DHX32_NM_-|	40.3123	-3.66458	1.54442	-2.37279	0.0176544	0.311034	0	1.05759	0	1.25137	2.11189	7.74175	51.3781	72.9736	127.549	73.8306	72.8601	72.9937	1.25953	5.05498	-3.39236	0.197423	-3.58978	DHX32	-	-
chr4:170062373-170062425:mpeak_156189|chr4_170017838_170192249_SH3RF1_NM_-|	49.7489	-4.10456	1.83178	-2.24075	0.0250424	0.347222	0	0	0	1.25137	0	9.4007	62.4868	40.1884	166.2	73.8306	63.3566	180.272	#DIV/0!	5.03312	-Inf	-0.239634	-Inf	SH3RF1	-	-
chr2:170854649-170854723:mpeak_114928|chr2_170684017_170938235_UBR3_NM_+|	59.7164	-4.59126	1.73826	-2.6413	0.00825887	0.273277	0	0	0	0	3.16783	7.74175	65.264	82.4919	232.68	96.3552	47.5174	181.378	#DIV/0!	5.03131	-Inf	0.226102	-Inf	UBR3	-	-
chr18:61014156-61014219:mpeak_95432|chr18_60999134_61034506_KDSR_NM_-|	59.9351	-3.07725	1.53188	-2.00881	0.0445571	0.434562	0	1.05759	0	6.25683	0	8.29473	79.15	65.5705	124.457	126.388	151	157.047	1.17869	5.02431	-3.78232	-0.690582	-3.09174	KDSR	-	-
chr10:103755669-103755738:mpeak_28898|chr10_103607377_103815932_C10orf76_NM_-|	56.2992	-3.97188	1.39427	-2.84872	0.0043895	0.267856	0	1.05759	0	3.7541	5.27971	7.18877	109.699	102.586	122.911	127.639	87.6433	107.832	0.94654	5.0207	-3.93915	0.0529612	-3.99211	C10orf76	-	-
chr17:65861969-65862019:mpeak_90543|chr17_65821779_65978367_BPTF_NM_+|	97.1454	-3.50619	1.78865	-1.96025	0.0499669	0.456492	0	1.05759	0	0	0	8.29473	112.476	145.947	401.973	118.88	140.44	236.676	0.480434	5.01701	-2.97142	0.413001	-3.38442	BPTF	-	-
chr3:38262524-38262644:mpeak_134218|chr3_38207025_38294307_OXSR1_NM_+|	102.517	-2.61989	1.0024	-2.61362	0.00895896	0.277333	4.16579	2.11518	0.773024	6.25683	9.50349	4.42386	238.839	182.963	378.782	165.18	93.9789	143.222	0.881106	5.01618	-1.51671	0.992487	-2.5092	OXSR1	-	-
chr1:214544597-214544672:mpeak_18561|chr1_214531393_214725024_PTPN14_NM_-|	81.0249	-2.85551	1.13218	-2.52212	0.0116649	0.288136	1.3886	3.17277	0	1.25137	6.33566	11.6126	195.792	204.115	165.427	136.399	101.371	145.434	1.21027	5.0103	-2.07354	0.560991	-2.63453	PTPN14	-	-
chr2:122209730-122209780:mpeak_111527|chr2_122098523_122407052_CLASP1_NM_-|	91.564	-4.09219	1.89829	-2.15573	0.031105	0.375408	0	0	0	0	0	9.4007	95.8132	100.471	329.308	115.126	124.601	324.048	#DIV/0!	5.00237	-Inf	-0.101174	-Inf	CLASP1	-	-
chrX:56766870-56766928:mpeak_212436|chrX_56755717_56843752_LINC01420_NR_+|	134.028	-3.8932	1.80491	-2.15701	0.0310052	0.375082	0	1.05759	0	7.5082	9.50349	0	134.694	174.502	496.281	156.421	136.217	492.154	0.393899	3.2515	-4.00768	0.0375345	-4.04521	LINC01420	chrX:56766923:+	chrX_56740487_+
chrX:41089091-41089157:mpeak_211576|chrX_40944887_41091639_USP9X_NM_+|	166.639	-4.59678	1.54296	-2.97919	0.00289008	0.267856	0	0	0	1.25137	1.05594	7.74175	262.445	292.952	537.252	272.798	248.147	376.028	#DIV/0!	1.12033	-Inf	0.284694	-Inf	USP9X	chrX:41089144:+	chrX_41229889_+
chrX:119007260-119007363:mpeak_214205|chrX_119005733_119010476_NDUFA1_NM_+|	404.898	-2.5541	1.13079	-2.25869	0.0239029	0.342168	1.3886	5.28794	0	12.5137	5.27971	14.9305	535.998	574.27	1446.33	671.984	504.741	1086.06	0.391724	1.44618	-2.29317	0.176127	-2.4693	NDUFA1	chrX:119007322:+;chrX:119007351:+	chrX_119873330_+
chrX:107012512-107012562:mpeak_213869|chrX_106957979_107019017_TSC22D3_NM_-|	336.534	-5.11509	1.84297	-2.77546	0.00551231	0.267856	0	0	0	0	0	13.8246	573.49	639.841	1074.5	410.448	391.755	934.54	#DIV/0!	2.38801	-Inf	0.397599	-Inf	TSC22D3	chrX:107012516:-	chrX_107769287_-
chrX:10019066-10019116:mpeak_210572|chrX_9983794_10109474_WWC3_NM_+|	121.607	-3.80381	1.89117	-2.01135	0.0442884	0.433291	0	0	0	0	0	9.4007	113.865	115.277	398.107	162.678	193.238	466.717	#DIV/0!	3.42828	-Inf	-0.391208	-Inf	WWC3	chrX:10019136:+	-
chr9:91934066-91934184:mpeak_205013|chr9_91933387_91973635_SECISBP2_NM_+|	100.528	-4.85595	1.44095	-3.36996	0.000751779	0.267856	0	1.05759	0	10.0109	3.16783	11.6126	168.02	192.481	302.252	183.951	121.433	212.345	0.478725	4.78848	-4.55099	0.356274	-4.90726	SECISBP2	chr9:91934124:+;chr9:91934199:+;chr9:91934228:+	chr9_89319294_+
chr9:85664080-85664130:mpeak_204571|chr9_85597697_85678043_RASEF_NM_-|	128.853	-3.29297	1.67337	-1.96787	0.049083	0.452488	0	1.05759	0	0	0	8.84772	201.346	217.863	370.279	241.514	212.245	293.081	0.401876	3.55407	-3.06453	0.080121	-3.14465	RASEF	chr9:85664077:-	-
chr9:35814264-35814314:mpeak_203064|chr9_35813142_35815042_HINT2_NM_-|	62.9482	-2.41236	1.17703	-2.04953	0.0404099	0.417238	2.77719	1.05759	0	2.50273	3.16783	8.29473	115.254	120.565	152.286	147.661	105.594	96.2189	1.48212	3.99609	-1.86463	0.151258	-2.01589	HINT2	chr9:35814242:-	-
chr9:139704424-139704528:mpeak_209982|chr9_139702373_139734773_RABL6_NM_+|	199.273	-2.31386	0.813601	-2.84398	0.00445543	0.267856	2.77719	4.23035	4.63814	21.2732	9.50349	25.4372	422.133	427.266	337.038	476.77	398.09	262.114	0.981568	4.94416	-2.27113	0.0614363	-2.33257	RABL6	chr9:139704478:+;chr9:139704506:+;chr9:139704568:+	chr9_136810043_+;chr9_136810115_+
chr9:108113017-108113067:mpeak_206542|chr9_108006893_108151313_SLC44A1_NM_+|	554.598	-3.66211	1.69245	-2.1638	0.0304801	0.37325	0	0	0	0	0	10.5067	633.2	868.28	998.747	1183.79	1436.08	1524.57	#DIV/0!	0.760536	-Inf	-0.72912	-Inf	SLC44A1	chr9:108113069:+	chr9_105350787_+
chr8:90934864-90935034:mpeak_196173|chr8_90914095_90936730_OSGIN2_NM_+|	326.765	-2.11982	0.86197	-2.45928	0.0139218	0.293546	6.94298	3.17277	0.773024	25.0273	11.6154	17.6954	527.667	451.59	715.047	798.371	544.867	818.414	0.642669	2.51373	-2.31912	-0.351441	-1.96768	OSGIN2	chr8:90934916:+;chr8:90934942:+	chr8_89922688_+;chr8_89922734_+
chr8:61769954-61770004:mpeak_194527|chr8_61591323_61777574_CHD7_NM_+|	155.842	-3.11885	1.49174	-2.09074	0.0365513	0.399377	0	1.05759	0	0	2.11189	7.74175	302.714	292.952	255.871	374.158	354.797	278.703	0.372593	1.46681	-3.21988	-0.242865	-2.97701	CHD7	chr8:61770008:+	chr8_60857445_+
chr8:48713223-48713273:mpeak_193953|chr8_48686938_48872743_PRKDC_NM_-|	195.736	-3.92567	1.5786	-2.48681	0.0128894	0.291257	0	0	0	0	3.16783	8.29473	215.232	224.209	510.196	404.191	378.028	605.516	#DIV/0!	1.23899	-Inf	-0.547283	-Inf	PRKDC	chr8:48713221:-	chr8_47800662_-
chr8:103250310-103250370:mpeak_197871|chr8_103220513_103251346_RRM2B_NM_-|	259.938	-4.40717	1.53281	-2.87521	0.00403757	0.267856	1.3886	0	0	2.50273	2.11189	9.4007	440.185	433.611	1018.07	376.661	273.489	561.83	0.220194	1.1564	-3.3353	0.642446	-3.97775	RRM2B	chr8:103250309:-	chr8_102238082_-
chr7:99691029-99691079:mpeak_186955|chr7_99690756_99699563_MCM7_NM_-|	445.656	-4.04892	1.55034	-2.61163	0.00901117	0.277333	0	0	0	0	4.22377	9.4007	513.781	525.621	1032.76	1066.16	781.398	1414.53	#DIV/0!	0.626491	-Inf	-0.65466	-Inf	MCM7	chr7:99691025:-	-
chr7:75362393-75362443:mpeak_185324|chr7_75167545_75368290_HIP1_NM_-|	118.271	-3.61552	1.58148	-2.28616	0.0222448	0.334091	0	0	0	2.50273	0	9.95368	165.243	125.853	183.98	281.557	248.147	402.018	#DIV/0!	2.00539	-Inf	-0.971742	-Inf	HIP1	chr7:75362388:-	chr7_75733074_-
chr7:6098068-6098119:mpeak_181525|chr7_6064432_6098860_EIF2AK1_NM_-|	497.696	-4.56759	1.71016	-2.67085	0.00756593	0.272549	0	0	0	0	0	11.0596	985.903	944.426	1168.81	885.967	739.16	1237.02	#DIV/0!	1.15923	-Inf	0.114771	-Inf	EIF2AK1	chr7:6098064:-	-
chr7:26239045-26239163:mpeak_182565|chr7_26231958_26240413_HNRNPA2B1_NM_-mpeak_182565|chr7_26231958_26240413_HNRNPA2B1_NM_-||	2787.16	-4.20478	1.69407	-2.48206	0.0130626	0.291528	1.3886	0	0	0	1.05594	18.2484	5030.88	5049.98	6506.54	6009.06	5084.36	5744.38	0.0251142	0.171973	-3.79723	-0.0216151	-3.77561	HNRNPA2B1	chr7:26239048:-	chr7_26199430_-
chr7:143590413-143590483:mpeak_190381|chr7_143551235_143599278_TCAF1_NM_-|	246.606	-4.64179	1.78758	-2.5967	0.00941254	0.277708	0	0	0	0	0	14.3775	373.532	452.648	575.13	432.973	520.58	590.032	#DIV/0!	2.79432	-Inf	-0.139508	-Inf	TCAF1	chr7:143590411:-	chr7_143893320_-
chr6:79786900-79786980:mpeak_174564|chr6_79651047_79788011_PHIP_NM_-|	245.325	-2.84122	1.01867	-2.78916	0.00528452	0.267856	2.77719	3.17277	0	12.5137	6.33566	12.1656	598.485	644.071	354.818	528.076	511.076	270.408	0.558725	2.36835	-2.38201	0.286619	-2.66863	PHIP	chr6:79786909:-	chr6_79077193_-
chr6:43565355-43565411:mpeak_173111|chr6_43543877_43581396_POLH_NM_+|	185.544	-3.30041	1.33202	-2.47775	0.0132215	0.292246	1.3886	1.05759	0	5.00546	1.05594	8.84772	519.335	369.098	355.591	421.71	224.916	318.518	0.294952	1.54476	-2.60759	0.366199	-2.97379	POLH	chr6:43565409:+	chr6_43597668_+
chr6:30705797-30705852:mpeak_171515|chr6_30695922_30710453_FLOT1_NM_-|	270.703	-3.90193	1.66645	-2.34146	0.0192087	0.315714	0	0	0	0	0	9.4007	549.884	418.805	453.765	680.743	489.957	645.883	#DIV/0!	1.55248	-Inf	-0.352846	-Inf	FLOT1	chr6:30705795:-	chr6_30738023_-
chr6:17811721-17811792:mpeak_170250|chr6_17761108_17987854_KIF13A_NM_-|	112.717	-4.48834	1.68197	-2.66851	0.00761893	0.27295	0	0	0	0	0	9.4007	241.616	243.245	241.957	220.24	229.14	167.001	#DIV/0!	4.57543	-Inf	0.237772	-Inf	KIF13A	chr6:17811680:-;chr6:17811788:-	chr6_17811445_-
chr6:168323835-168323887:mpeak_180677|chr6_168227670_168370461_MLLT4_NM_+|	162.169	-4.41099	1.72416	-2.55835	0.0105171	0.28376	0	0	0	0	0	11.6126	362.424	296.125	274.424	346.628	336.846	317.965	#DIV/0!	3.47878	-Inf	-0.102169	-Inf	MLLT4	chr6:168323886:+	chr6_167923205_+
chr6:16646020-16646070:mpeak_170094|chr6_16307090_16761721_ATXN1_NM_-|	122.456	-3.74039	1.76542	-2.11869	0.0341163	0.387884	0	1.05759	0	0	0	10.5067	211.067	177.675	423.617	191.459	149.944	304.14	0.390562	4.88271	-3.31245	0.331603	-3.64406	ATXN1	chr6:16645986:-	chr6_16645757_-
chr6:158897766-158897821:mpeak_180223|chr6_158733691_158927609_TULP4_NM_+|	62.1018	-3.88971	1.68213	-2.31237	0.0207574	0.326257	0	1.05759	0	0	2.11189	7.18877	73.5956	115.277	262.828	76.3333	58.0769	148.752	0.702404	4.92685	-3.13655	0.673738	-3.81029	TULP4	chr6:158897777:+	chr6_158476741_+
chr6:107678998-107679048:mpeak_176098|chr6_107475981_107780779_PDSS2_NM_-|	123.493	-4.26032	1.80673	-2.35803	0.0183723	0.313394	0	0	0	0	0	12.1656	152.746	170.272	337.038	239.011	221.748	348.932	#DIV/0!	4.5075	-Inf	-0.294783	-Inf	PDSS2	chr6:107678994:-	-
chr5:95089102-95089162:mpeak_162526|chr5_95066849_95128762_RHOBTB3_NM_+|	122.521	-3.92046	1.50116	-2.61162	0.00901146	0.277333	0	0	0	5.00546	1.05594	8.84772	131.917	150.178	234.226	290.317	220.692	428.008	#DIV/0!	1.58774	-Inf	-0.862885	-Inf	RHOBTB3	chr5:95089163:+	-
chr5:141489543-141489593:mpeak_166567|chr5_141488323_141531295_NDFIP1_NM_+|	195.951	-3.63918	1.44913	-2.51128	0.0120293	0.289771	1.3886	0	0	1.25137	3.16783	8.29473	355.481	322.564	481.594	396.683	311.503	469.482	0.359232	1.07959	-3.19471	-0.0222571	-3.17245	NDFIP1	chr5:141489594:+	chr5_142110028_+
chr5:137877592-137877710:mpeak_165776|chr5_137844076_137878989_ETF1_NM_-|	382.606	-4.54349	1.67597	-2.71096	0.00670897	0.269946	0	1.05759	0	3.7541	0	21.5663	820.661	719.16	714.274	1058.66	602.943	649.201	0.140756	1.64361	-4.58145	-0.0358443	-4.54561	ETF1	chr5:137877644:-	chr5_138541971_-
chr5:127392677-127392727:mpeak_164596|chr5_127359990_127418766_LINC01184_NR_-|	145.248	-3.98194	1.52846	-2.6052	0.00918199	0.277549	1.3886	0	0	1.25137	3.16783	12.1656	295.771	349.004	206.397	362.896	327.342	183.59	0.489418	1.89795	-3.57816	-0.0378984	-3.54026	LINC01184	chr5:127392674:-	-
chr5:10286127-10286181:mpeak_157466|chr5_10280744_10308168_CMBL_NM_-|	155.468	-2.55024	1.20981	-2.10796	0.0350342	0.391531	2.77719	1.05759	0	5.00546	4.22377	6.63579	220.787	234.785	533.387	247.77	202.741	406.442	0.58164	1.85133	-2.04863	0.206692	-2.25533	CMBL	chr5:10286125:-	chr5_10286015_-
chr4:40566712-40566762:mpeak_148693|chr4_40428160_40631883_RBM47_NM_-|	161.372	-4.59224	1.93432	-2.37409	0.0175924	0.31089	0	0	0	0	0	10.5067	179.129	190.366	679.488	206.475	145.72	524.78	#DIV/0!	3.59417	-Inf	0.258383	-Inf	RBM47	chr4:40566721:-	-
chr4:39829444-39829518:mpeak_148561|chr4_39827108_39979576_PDS5A_NM_-|	258.693	-2.97293	1.22869	-2.41959	0.0155379	0.29993	1.3886	3.17277	0	6.25683	15.8391	11.0596	292.994	272.858	967.053	431.721	317.839	784.129	0.446345	2.16182	-2.86172	-0.000737824	-2.86098	PDS5A	chr4:39829448:-	chr4_39827824_-
chr4:3125696-3125750:mpeak_146762|chr4_3076236_3241572_HTT_NM_+|	121.04	-4.8851	1.81297	-2.69452	0.00704901	0.269946	0	0	0	1.25137	0	14.9305	149.968	162.869	396.561	177.694	161.559	387.641	#DIV/0!	3.33925	-Inf	-0.0351486	-Inf	HTT	chr4:3125751:+	chr4_3124022_+;chr4_3124068_+
chr4:109572108-109572230:mpeak_152970|chr4_109571740_109588402_OSTC_NM_+|	959.845	-2.08038	1.03792	-2.00437	0.0450302	0.435752	1.3886	3.17277	0	7.5082	5.27971	6.63579	1870.44	1459.47	2144.37	2311.27	1266.08	2442.52	0.124985	0.32266	-2.09028	-0.137063	-1.95322	OSTC	chr4:109572233:+	chr4_108651074_+
chr3:71628965-71629046:mpeak_137231|chr3_71008542_71633140_FOXP1_NM_-|	1023.02	-3.98742	1.59395	-2.5016	0.0123635	0.29001	0	1.05759	0	1.25137	1.05594	17.1424	1807.95	1976.63	1794.19	2107.3	2150.96	2418.74	0.0568721	0.291295	-4.2009	-0.259252	-3.94165	FOXP1	chr3:71628962:-	chr3_71579796_-
chr3:5216958-5217045:mpeak_131694|chr3_5163929_5220348_ARL8B_NM_+|	399.208	-3.60865	1.47485	-2.44679	0.0144135	0.293828	0	1.05759	0	6.25683	5.27971	2.76491	613.76	603.883	1176.54	722.038	479.398	1179.51	0.13252	0.600662	-3.75731	0.00799903	-3.76531	ARL8B	chr3:5217046:+	chr3_5175360_+
chr3:196530663-196530814:mpeak_145871|chr3_196466727_196555189_PAK2_NM_+|	517.555	-2.20835	1.03827	-2.12695	0.0334243	0.386071	0	4.23035	0	3.7541	7.3916	8.84772	942.857	882.029	1131.71	1247.61	821.524	1160.71	0.429246	0.619021	-2.24067	-0.127529	-2.11315	PAK2	chr3:196530805:+	chr3_196803942_+
chr3:160943166-160943336:mpeak_143263|chr3_160939098_160968567_NMD3_NM_+|	363.019	-3.14071	1.31144	-2.39485	0.016627	0.306117	2.77719	1.05759	0	1.25137	3.16783	17.6954	867.873	785.788	708.09	889.721	584.992	493.813	0.243555	1.12341	-2.52778	0.262741	-2.79053	NMD3	chr3:160943361:+	-
chr3:14987712-14987763:mpeak_132586|chr3_14987661_14989948_FGD5-AS1_NR_-|	648.601	-3.15797	1.37973	-2.28883	0.0220891	0.332731	0	1.05759	0	3.7541	2.11189	5.52982	1188.64	1164.4	1161.08	1680.58	1290.36	1285.68	0.0902861	0.267719	-3.42965	-0.276546	-3.15311	FGD5-AS1	chr3:14987711:-	chr3_14946205_-
chr3:133893199-133893249:mpeak_140877|chr3_133877108_133969586_RYK_NM_-|	157.949	-5.49464	1.90422	-2.88551	0.00390786	0.267856	0	0	0	1.25137	0	17.6954	184.683	179.79	693.403	241.514	145.72	431.326	#DIV/0!	3.47198	-Inf	0.370011	-Inf	RYK	chr3:133893198:-	chr3_134174355_-
chr3:10038812-10038862:mpeak_132069|chr3_10028576_10044400_EMC3-AS1_NR_+|	112.887	-4.01638	1.41266	-2.84314	0.00446716	0.267856	0	0	0	1.25137	4.22377	7.18877	194.404	174.502	168.519	290.317	269.265	244.971	#DIV/0!	1.57403	-Inf	-0.582125	-Inf	EMC3-AS1	chr3:10038863:+	chr3_9997178_+
chr22:46204314-46204364:mpeak_131131|chr22_46067677_46239548_ATXN10_NM_+|	165.841	-4.3392	1.77474	-2.44498	0.014486	0.293974	0	0	0	0	0	10.5067	230.507	250.648	498.601	330.361	225.972	443.492	#DIV/0!	3.15255	-Inf	-0.0292519	-Inf	ATXN10	chr22:46204328:+	chr22_45808447_+
chr22:39714401-39714456:mpeak_130401|chr22_39708989_39715670_RPL3_NM_-|	1357.86	-4.68871	1.49825	-3.12947	0.00175124	0.267856	0	0	0	2.50273	0	8.29473	2663.33	2923.17	3330.19	2791.8	2120.33	2454.69	#DIV/0!	0.219853	-Inf	0.275466	-Inf	RPL3	chr22:39714408:-	-
chr22:36912310-36912468:mpeak_130149|chr22_36907047_36925277_EIF3D_NM_-|	1653.25	-3.80936	1.43164	-2.66083	0.00779472	0.273136	0	1.05759	0	1.25137	7.3916	6.63579	4160.23	3419.18	2234.04	4368.52	2855.27	2785.37	0.0323308	0.152648	-3.85268	-0.0284874	-3.82419	EIF3D	chr22:36912399:-	chr22_36516348_-
chr22:29975709-29975759:mpeak_129446|chr22_29951988_29977326_NIPSNAP1_NM_-|	303.127	-4.202	1.46007	-2.87794	0.00400277	0.267856	0	1.05759	0	3.7541	2.11189	9.95368	598.485	499.182	881.247	491.787	425.545	724.407	0.160329	0.963592	-3.90287	0.269485	-4.17235	NIPSNAP1	chr22:29975710:-	chr22_29579721_-
chr21:45462401-45462458:mpeak_127826|chr21_45432205_45523173_TRAPPC10_NM_+|	78.2825	-4.8458	1.55759	-3.11108	0.00186402	0.267856	0	0	0	2.50273	4.22377	11.0596	119.419	101.528	209.49	128.891	91.867	270.408	#DIV/0!	3.62121	-Inf	-0.190408	-Inf	TRAPPC10	chr21:45462453:+	chr21_44042571_+
chr21:35893370-35893421:mpeak_126842|chr21_35890554_35987441_RCAN1_NM_-|	69.0806	-4.56631	1.50456	-3.03498	0.00240554	0.267856	0	0	0	7.5082	4.22377	7.18877	141.637	72.9736	123.684	222.743	66.5244	182.484	#DIV/0!	4.01074	-Inf	-0.479749	-Inf	RCAN1	chr21:35893369:-	chr21_34521072_-
chr20:52582698-52582748:mpeak_124769|chr20_52561535_52687304_BCAS1_NM_-|	313.398	-4.189	1.72233	-2.43217	0.0150085	0.297574	0	0	0	0	0	8.29473	622.091	902.123	426.709	561.863	877.488	362.203	#DIV/0!	1.38126	-Inf	0.114914	-Inf	BCAS1	chr20:52582697:-	chr20_53966159_-
chr20:49355003-49355060:mpeak_124356|chr20_49348080_49366195_PARD6B_NM_+|	3015.73	-2.6073	1.0314	-2.52793	0.0114737	0.288014	1.3886	3.17277	0	7.5082	2.11189	6.63579	6805.51	6438.6	8683.38	4816.51	3875.31	5548.62	0.031203	0.114153	-1.83342	0.622747	-2.45617	PARD6B	chr20:49355060:+	-
chr20:47438201-47438293:mpeak_124028|chr20_47242465_47444420_PREX1_NM_-|	774.357	-2.36467	1.14603	-2.06336	0.0390784	0.412276	12.4974	13.7486	25.5098	15.0164	11.6154	77.9705	980.349	1274.39	4295.69	634.443	534.307	1416.74	0.790112	4.04574	-1.01512	1.34115	-2.35627	PREX1	chr20:47438198:-;chr20:47438225:-	chr20_48821678_-
chr2:9034436-9034486:mpeak_103024|chr2_8999034_9143876_MBOAT2_NM_-|	121.573	-4.22978	1.74722	-2.42086	0.0154839	0.299755	0	0	0	0	0	12.1656	209.678	184.02	245.049	269.044	250.258	288.657	#DIV/0!	4.51716	-Inf	-0.339037	-Inf	MBOAT2	chr2:9034435:-	chr2_8894306_-
chr2:74087761-74087830:mpeak_108556|chr2_74056042_74089329_STAMBP_NM_+|	87.2852	-3.59268	1.71457	-2.09538	0.036137	0.397089	1.3886	0	0	2.50273	5.27971	4.97684	54.1553	77.204	395.788	110.12	91.867	304.14	0.790251	2.52096	-3.19985	0.058706	-3.25855	STAMBP	chr2:74087832:+	chr2_73860703_+
chr2:61453839-61453977:mpeak_107281|chr2_61415844_61697849_USP34_NM_-|	109.597	-2.76105	1.07309	-2.573	0.0100822	0.28147	1.3886	3.17277	0	6.25683	10.5594	11.6126	158.3	152.293	323.124	206.475	183.734	258.243	1.07967	4.38411	-2.63982	-0.0331619	-2.60666	USP34	chr2:61453923:-	chr2_61226703_-;chr2_61226779_-
chr2:25017688-25017765:mpeak_104141|chr2_25016174_25042222_CENPO_NM_+|	153.784	-4.16108	1.82896	-2.27511	0.0228991	0.337776	0	0	0	0	0	16.5895	244.393	190.366	231.134	389.175	347.405	426.349	#DIV/0!	4.27957	-Inf	-0.804401	-Inf	CENPO	chr2:25017773:+	-
chr2:242599967-242600021:mpeak_120157|chr2_242577026_242611605_ATG4B_NM_+|	140.245	-3.66021	1.41591	-2.58506	0.00973622	0.279791	1.3886	0	0	2.50273	2.11189	6.63579	280.496	327.852	281.381	312.841	247.091	220.64	0.468208	1.4413	-3.01828	0.188835	-3.20711	ATG4B	chr2:242600011:+;chr2:242600055:+	chr2_241660591_+;chr2_241660637_+
chr2:242594399-242594449:mpeak_120156|chr2_242577026_242611605_ATG4B_NM_+|	140.498	-4.04823	1.49653	-2.70508	0.00682872	0.269946	0	1.05759	0	2.50273	1.05594	11.0596	280.496	327.852	281.381	312.841	247.091	220.64	0.356599	1.87277	-3.78893	0.188835	-3.97776	ATG4B	chr2:242594417:+;chr2:242594448:+	chr2_241655014_+;chr2_241655034_+
chr2:230697514-230697564:mpeak_119144|chr2_230632466_230786725_TRIP12_NM_-|	411.432	-4.17809	1.73193	-2.4124	0.015848	0.300676	0	0	0	0	0	9.4007	619.314	573.213	1223.7	762.082	610.335	1139.14	#DIV/0!	1.12289	-Inf	-0.0558297	-Inf	TRIP12	chr2:230697491:-	-
chr2:157297726-157297777:mpeak_113854|chr2_157291964_157439304_GPD2_NM_+|	143.288	-3.02825	1.38335	-2.18907	0.0285918	0.3645	1.3886	1.05759	0	2.50273	4.22377	6.0828	218.01	188.251	548.074	247.77	163.671	338.425	0.384485	1.70821	-2.38859	0.347861	-2.73645	GPD2	chr2:157297778:+	chr2_156441267_+
chr2:153550898-153550959:mpeak_113773|chr2_153512912_153573975_PRPF40A_NM_-|	202.362	-3.15309	1.14625	-2.75079	0.00594526	0.267856	2.77719	1.05759	0.773024	10.0109	6.33566	28.2021	291.605	228.439	544.209	404.191	362.188	548.558	0.432961	3.38789	-3.27323	-0.305153	-2.96808	PRPF40A	chr2:153550903:-	chr2_152694390_-;chr2_152694434_-
chr2:112851137-112851187:mpeak_110970|chr2_112812799_112873660_TMEM87B_NM_+|	175.268	-4.39372	1.49245	-2.94397	0.00324036	0.267856	0	0	0	0	2.11189	7.18877	344.372	341.601	415.887	350.382	275.601	366.074	#DIV/0!	1.40627	-Inf	0.151445	-Inf	TMEM87B	chr2:112851210:+	chr2_112093644_+
chr19:56190343-56190408:mpeak_102223|chr19_56186560_56206513_EPN1_NM_+|	100.252	-2.26878	1.15657	-1.96164	0.0498039	0.455736	1.3886	4.23035	0	3.7541	4.22377	16.0365	222.175	208.345	156.924	279.055	175.287	131.61	1.43476	4.09836	-2.09552	0.0036721	-2.0992	EPN1	chr19:56190395:+	chr19_55679028_+
chr19:47112122-47112246:mpeak_100740|chr19_47104511_47112381_CALM3_NM_+|	1589.7	-2.25034	0.981902	-2.29181	0.0219164	0.33213	2.77719	4.23035	0	12.5137	12.6713	9.4007	2248.14	2271.7	4441.02	3163.45	2348.42	4562.1	0.117303	0.343317	-2.30319	-0.168924	-2.13427	CALM3	chr19:47112169:+;chr19:47112221:+	chr19_46608978_+
chr19:4414052-4414107:mpeak_96274|chr19_4402659_4442921_CHAF1A_NM_+|	64.5248	-3.20788	1.49727	-2.14249	0.0321542	0.380814	1.3886	0	0	5.00546	5.27971	4.97684	68.0412	66.6281	171.611	137.65	101.371	212.345	1.36012	3.3813	-3.45825	-0.559443	-2.8988	CHAF1A	chr19:4414110:+	-
chr19:39126247-39126297:mpeak_99726|chr19_39109711_39127528_EIF3K_NM_+|	585.276	-4.41368	1.48823	-2.96572	0.00301975	0.267856	0	0	0	0	3.16783	8.84772	1187.25	1108.35	1020.39	1524.16	1001.03	1170.11	#DIV/0!	0.487735	-Inf	-0.156253	-Inf	EIF3K	chr19:39126298:+	chr19_38635657_+
chr19:23984618-23984668:mpeak_98637|chr19_23945815_24009871_RPSAP58_NR_+|	1095.62	-5.01615	1.42092	-3.53022	0.000415207	0.267856	0	0	0	3.7541	2.11189	9.95368	2266.19	2153.25	2393.28	2450.17	1645.16	2223.54	#DIV/0!	0.250356	-Inf	0.108564	-Inf	RPSAP58	chr19:23984669:+	chr19_23801866_+
chr19:23974830-23974885:mpeak_98633|chr19_23945815_24009871_RPSAP58_NR_+|	1095.84	-3.10333	1.31542	-2.35918	0.0183152	0.313389	2.77719	0	0	0	7.3916	8.29473	2266.19	2153.25	2393.28	2450.17	1645.16	2223.54	0.122294	0.372368	-2.49781	0.108564	-2.60637	RPSAP58	chr19:23974882:+	-
chr19:21281015-21281155:mpeak_98349|chr19_21264952_21307763_ZNF714_NR_+mpeak_98349|chr19_21264952_21299612_ZNF714_NM_+||	133.628	-2.43185	1.23103	-1.97546	0.0482162	0.449701	2.77719	1.05759	0	6.25683	1.05594	9.95368	337.429	269.685	165.427	335.366	267.154	207.368	0.744578	2.13196	-2.17076	-0.0681106	-2.10264	ZNF714	chr19:21281158:+	-
chr19:16973809-16973877:mpeak_97836|chr19_16940197_16989307_SIN3B_NM_+|	113.015	-5.29414	1.38292	-3.82822	0.000129075	0.257152	0	0	0	2.50273	5.27971	7.74175	280.496	239.015	252.779	195.213	189.014	184.143	#DIV/0!	2.73135	-Inf	0.442313	-Inf	SIN3B	chr19:16973862:+	chr19_16863048_+
chr19:1413782-1413832:mpeak_95979|chr19_1407567_1434735_DAZAP1_NM_+|	888.167	-2.64294	1.24135	-2.12909	0.0332471	0.385888	0	2.11518	0	3.7541	4.22377	4.97684	1866.27	1515.52	1836.71	2057.25	1399.12	1968.06	0.121597	0.238821	-2.61463	-0.0558366	-2.55879	DAZAP1	chr19:1413837:+	chr19_1413823_+;chr19_1413855_+
chr18:60226113-60226163:mpeak_95379|chr18_60190657_60251678_ZCCHC2_NR_+mpeak_95379|chr18_60190657_60243744_ZCCHC2_NM_+||	145.383	-4.39405	1.68596	-2.60626	0.00915358	0.277333	0	0	0	0	0	8.84772	316.6	230.554	388.058	274.049	209.077	317.412	#DIV/0!	3.31567	-Inf	0.224325	-Inf	ZCCHC2	chr18:60226205:+	-
chr18:21976863-21976914:mpeak_93679|chr18_21743245_21977833_OSBPL1A_NM_-|	52.8278	-3.24053	1.45994	-2.21963	0.0264438	0.355112	1.3886	1.05759	0	2.50273	3.16783	5.52982	74.9842	75.0888	240.41	68.8251	45.4055	115.573	0.939675	4.87389	-2.19494	0.764858	-2.9598	OSBPL1A	chr18:21976864:-	chr18_24396900_-
chr17:77811919-77811973:mpeak_91624|chr17_77809194_77813213_CBX4_NM_-|	664.478	-2.5966	1.15546	-2.24724	0.0246245	0.346164	2.77719	2.11518	0	2.50273	1.05594	11.0596	1692.7	1463.7	1727.71	1112.46	838.419	1119.24	0.150254	0.476148	-1.57917	0.669801	-2.24897	CBX4	chr17:77811918:-	chr17_79838120_-
chr17:65944502-65944552:mpeak_90587|chr17_65821779_65978367_BPTF_NM_+|	97.3715	-4.94494	1.7112	-2.88975	0.00385549	0.267856	0	0	0	0	2.11189	9.95368	112.476	145.947	401.973	118.88	140.44	236.676	#DIV/0!	3.64889	-Inf	0.413001	-Inf	BPTF	chr17:65944515:+	chr17_67948398_+
chr17:57744838-57744888:mpeak_88496|chr17_57697049_57771088_CLTC_NM_+|	2632.41	-4.49658	1.92258	-2.33883	0.0193443	0.316393	0	0	0	0	0	14.9305	2754.98	2743.38	8591.39	4618.79	3438.15	9427.24	#DIV/0!	0.256183	-Inf	-0.311405	-Inf	CLTC	chr17:57744876:+	-
chr17:49371465-49371515:mpeak_87628|chr17_49337896_49375142_UTP18_NM_+|	70.7915	-3.87817	1.85236	-2.09364	0.0362917	0.397498	0	0	0	1.25137	0	7.74175	59.7096	69.8008	257.417	90.0984	78.1398	285.339	#DIV/0!	2.97407	-Inf	-0.229284	-Inf	UTP18	chr17:49371522:+	chr17_51294160_+
chr17:45206670-45206720:mpeak_87050|chr17_45198383_45266678_CDC27_NM_-|	164.429	-4.36655	1.8369	-2.37713	0.0174478	0.309843	0	0	0	0	0	13.2716	236.061	189.308	453.765	314.093	263.986	502.661	#DIV/0!	3.68403	-Inf	-0.297862	-Inf	CDC27	chr17:45206668:-	chr17_47129304_-
chr17:40966193-40966243:mpeak_86424|chr17_40962946_40976310_BECN1_NM_-|	160.013	-4.13976	1.69192	-2.44678	0.014414	0.293828	0	0	0	1.25137	0	9.95368	233.284	225.266	395.788	329.109	186.902	538.605	#DIV/0!	1.59371	-Inf	-0.303837	-Inf	BECN1	chr17:40966186:-	-
chr17:3725797-3725851:mpeak_82346|chr17_3716573_3749545_C17orf85_NM_-|	154.178	-3.03855	1.26784	-2.39664	0.0165463	0.305514	0	0	2.31907	2.50273	4.22377	17.1424	265.222	268.627	341.677	259.033	307.279	382.111	0.794633	2.5167	-3.36352	-0.11538	-3.24814	C17orf85	chr17:3725798:-	-
chr17:15567384-15567434:mpeak_83580|chr17_15532512_15586193_TRIM16_NM_-|	265.306	-4.34987	1.67227	-2.60118	0.00929049	0.277708	0	0	0	0	0	9.4007	524.889	491.779	623.83	520.568	393.867	619.34	#DIV/0!	1.83874	-Inf	0.0970473	-Inf	TRIM16	chr17:15567383:-	-
chr16:73091142-73091245:mpeak_80053|chr16_72822747_73092534_ZFHX3_NM_-|	650.118	-2.50912	1.06337	-2.3596	0.0182944	0.313389	0	2.11518	3.0921	0	8.44754	9.4007	1885.71	1850.78	1202.83	1051.15	1048.55	739.337	0.158137	0.943009	-1.77718	0.798911	-2.57609	ZFHX3	chr16:73091181:-	chr16_73057284_-
chr16:69201118-69201174:mpeak_79256|chr16_69166498_69202723_CIRH1A_NM_+|	141.126	-4.20608	1.49481	-2.81379	0.00489611	0.267856	0	0	0	3.7541	1.05594	8.29473	284.662	190.366	244.276	414.202	198.517	348.379	#DIV/0!	1.36352	-Inf	-0.418083	-Inf	CIRH1A	chr16:69201165:+	chr16_69167260_+
chr16:3500114-3500164:mpeak_74728|chr16_3493667_3535466_NAA60_NM_+|	83.1755	-3.2956	1.2923	-2.55017	0.010767	0.28561	1.3886	1.05759	0	3.7541	4.22377	8.84772	195.792	203.057	122.911	158.923	184.79	113.361	0.70325	3.68114	-2.78205	0.190956	-2.97301	NAA60	chr16:3500165:+	chr16_3450164_+
chr16:21976804-21976894:mpeak_76501|chr16_21964608_21994408_UQCRC2_NM_+|	188.295	-3.90287	1.65028	-2.36498	0.0180313	0.313389	0	1.05759	0	1.25137	5.27971	9.95368	197.181	171.329	732.054	285.311	219.636	636.483	0.288285	1.44422	-3.96228	-0.0525998	-3.90968	UQCRC2	chr16:21976854:+;chr16:21976886:+	chr16_21965485_+;chr16_21965533_+;chr16_21965564_+
chr16:18843133-18843215:mpeak_76107|chr16_18820968_18937726_SMG1_NM_-|	373.859	-3.92939	1.75809	-2.23503	0.0254152	0.350213	1.3886	0	0	0	0	13.8246	1001.18	795.306	559.669	877.208	685.307	552.429	0.176805	1.96098	-3.31553	0.155815	-3.47135	SMG1	chr16:18843130:-	-
chr16:18537687-18537739:mpeak_76062|chr16_18511825_18573434_NOMO2_NM_-|	313.452	-4.3407	1.53846	-2.82146	0.0047806	0.267856	0	0	0	2.50273	2.11189	9.95368	437.408	402.941	749.06	579.382	446.664	1131.4	#DIV/0!	0.675256	-Inf	-0.440835	-Inf	NOMO2	chr16:18537687:-	-
chr15:91414084-91414135:mpeak_73326|chr15_91411821_91424515_FURIN_NM_+|	133.423	-4.42466	1.51128	-2.92776	0.0034141	0.267856	1.3886	0	0	2.50273	6.33566	15.4835	199.958	215.748	345.542	225.246	176.342	412.525	0.547232	2.98753	-4.13056	-0.0968633	-4.03369	FURIN	chr15:91414136:+	-
chr15:78783322-78783375:mpeak_71994|chr15_78730517_78790374_IREB2_NM_+|	338.068	-4.27805	1.43328	-2.98479	0.00283775	0.267856	0	0	0	0	4.22377	6.63579	647.086	664.166	619.192	695.759	613.503	806.248	#DIV/0!	0.769996	-Inf	-0.132073	-Inf	IREB2	chr15:78783374:+	-
chr15:69113024-69113159:mpeak_70894|chr15_69072481_69113261_ANP32A_NM_-|	311.406	-3.40054	1.24145	-2.73917	0.00615948	0.268895	0	2.11518	0	6.25683	6.33566	9.4007	542.941	568.983	701.133	581.885	477.286	840.533	0.349991	1.15772	-3.37821	-0.067351	-3.31086	ANP32A	chr15:69112995:-;chr15:69113033:-	-
chr15:63338157-63338209:mpeak_70008|chr15_63334837_63363288_TPM1_NM_+|	144.976	-3.68305	1.70476	-2.16045	0.0307376	0.373829	0	0	0	0	0	9.4007	231.896	200.942	266.693	369.153	228.084	433.538	#DIV/0!	2.73601	-Inf	-0.55927	-Inf	TPM1	chr15:63338187:+;chr15:63338232:+	chr15_63046032_+
chr15:50901283-50901334:mpeak_68674|chr15_50854005_50979012_TRPM7_NM_-|	328.284	-5.20744	1.40831	-3.69764	0.000217613	0.257152	0	0	0	5.00546	2.11189	9.4007	722.07	807.998	610.689	689.503	584.992	507.638	#DIV/0!	0.92687	-Inf	0.264516	-Inf	TRPM7	chr15:50901281:-	chr15_50609087_-
chr15:45893283-45893391:mpeak_68298|chr15_45879416_45898592_BLOC1S6_NM_+|	112.671	-4.5089	1.61246	-2.79628	0.00516939	0.267856	0	1.05759	0	0	1.05594	9.95368	315.211	259.109	321.578	207.727	123.545	112.808	0.354143	3.71879	-3.37991	1.01251	-4.39243	BLOC1S6	chr15:45893361:+	chr15_45601178_+
chr15:39878952-39879008:mpeak_67465|chr15_39873279_39887562_THBS1_NM_+|	112.39	-2.79446	1.39397	-2.00468	0.0449973	0.435685	0	0	1.54605	5.00546	11.6154	2.76491	131.917	156.523	269.785	225.246	172.119	372.157	0.830873	2.51919	-3.64834	-0.463115	-3.18522	THBS1	chr15:39878998:+	chr15_39586795_+
chr14:75642060-75642115:mpeak_64191|chr14_75601709_75643349_TMED10_NM_-|	1496.79	-3.93427	1.68767	-2.33119	0.0197436	0.318634	0	1.05759	0	1.25137	0	13.8246	2431.43	2293.91	4396.19	2859.37	1937.66	4026.82	0.0347833	0.256282	-3.8334	0.0478686	-3.88126	TMED10	chr14:75642061:-	chr14_75175362_-
chr14:69440271-69440321:mpeak_63240|chr14_69341734_69446083_ACTN1_NM_-|	943.282	-3.96161	1.67553	-2.36438	0.0180601	0.313389	0	0	0	1.25137	0	9.4007	1330.28	1045.95	2465.95	1776.94	1370.61	3319	#DIV/0!	0.247088	-Inf	-0.417341	-Inf	ACTN1	chr14:69440263:-	chr14_68973549_-
chr14:34915090-34915140:mpeak_59849|chr14_34904510_34931468_SPTSSA_NM_-|	151.497	-3.91053	1.9713	-1.98373	0.0472856	0.444928	0	0	0	0	0	9.95368	105.533	119.507	571.265	244.016	183.734	583.949	#DIV/0!	2.95157	-Inf	-0.345387	-Inf	SPTSSA	chr14:34915100:-	-
chr13:28225629-28225690:mpeak_54272|chr13_28194879_28239822_POLR1D_NM_+|	140.833	-4.42264	1.61501	-2.73845	0.00617286	0.268895	1.3886	0	0	1.25137	5.27971	15.4835	149.968	209.403	486.232	217.738	187.958	415.29	0.492641	2.68148	-3.98676	0.0426244	-4.02938	POLR1D	chr13:28225681:+	chr13_27651564_+
chr13:20619931-20619986:mpeak_53370|chr13_20532809_20659961_ZMYM2_NM_+|	246.605	-3.38982	1.2838	-2.64045	0.00827963	0.273277	1.3886	1.05759	0	2.50273	3.16783	9.95368	495.729	537.255	609.143	447.989	349.517	501.555	0.223447	1.20273	-2.67518	0.338096	-3.01328	ZMYM2	chr13:20619988:+	-
chr12:68045037-68045087:mpeak_47419|chr12_68042511_68050885_DYRK2_NM_+|	138.166	-3.58667	1.55705	-2.3035	0.0212506	0.328955	0	0	0	1.25137	3.16783	6.63579	149.968	122.68	329.308	269.044	242.867	533.075	#DIV/0!	1.05791	-Inf	-0.795751	-Inf	DYRK2	chr12:68045114:+	-
chr12:6440196-6440302:mpeak_41277|chr12_6438788_6451283_TNFRSF1A_NM_-|	338.062	-1.79126	0.898622	-1.99334	0.0462244	0.440752	2.77719	4.23035	0	8.75956	4.22377	7.74175	619.314	744.542	698.041	628.186	650.461	688.463	0.509789	1.05358	-1.5644	0.067895	-1.63229	TNFRSF1A	chr12:6440250:-	chr12_6331000_-;chr12_6331086_-
chr12:56307757-56307810:mpeak_46006|chr12_56296139_56321697_WIBG_NM_-|	117.248	-3.69371	1.67402	-2.20648	0.0273501	0.360443	0	1.05759	0	0	1.05594	12.1656	177.74	193.539	318.486	231.503	157.335	314.094	0.459978	2.82137	-3.64404	-0.0272806	-3.61676	WIBG	chr12:56307757:-	-
chr12:56187115-56187165:mpeak_45942|chr12_56146624_56211540_SARNP_NR_-mpeak_45942|chr12_56151337_56211540_SARNP_NM_-||	196.84	-4.19049	1.62154	-2.58427	0.00975848	0.279824	0	0	0	1.25137	3.16783	10.5067	190.238	193.539	542.663	410.448	269.265	740.996	#DIV/0!	1.05059	-Inf	-0.616843	-Inf	SARNP	chr12:56187112:-	-
chr12:54667730-54667793:mpeak_45839|chr12_54635689_54673915_CBX5_NM_-|	1262.39	-2.65348	1.2913	-2.05489	0.0398896	0.415297	1.3886	1.05759	0	6.25683	3.16783	11.6126	1646.88	1335.73	2632.15	3197.24	2526.87	3786.27	0.0653506	0.221203	-3.10434	-0.76028	-2.34406	CBX5	chr12:54667704:-;chr12:54667743:-	chr12_54273959_-
chr12:50947013-50947063:mpeak_45119|chr12_50898767_51138369_DIP2B_NM_+|	109.987	-3.94494	1.82106	-2.16629	0.0302891	0.372174	0	0	0	0	0	8.84772	123.585	148.062	341.677	157.672	157.335	382.664	#DIV/0!	3.80453	-Inf	-0.185898	-Inf	DIP2B	chr12:50947088:+	-
chr12:50839620-50839670:mpeak_45079|chr12_50794591_50854917_LARP4_NR_+mpeak_45079|chr12_50794591_50869308_LARP4_NM_+||	361.105	-4.4021	1.6744	-2.62906	0.00856218	0.273381	0	0	0	0	0	9.4007	894.256	741.369	638.518	879.71	597.664	572.337	#DIV/0!	1.37591	-Inf	0.149903	-Inf	LARP4	chr12:50839672:+	chr12_50445888_+
chr12:133214976-133215027:mpeak_53029|chr12_133201396_133264110_POLE_NM_-|	83.3833	-3.48127	1.57402	-2.21171	0.0269868	0.358109	1.3886	0	0	1.25137	1.05594	13.2716	133.305	139.602	139.917	177.694	187.958	205.156	1.0091	2.72927	-3.48789	-0.467478	-3.02041	POLE	chr12:133214972:-	chr12_132638391_-
chr12:13137147-13137202:mpeak_42166|chr12_13128413_13153243_HEBP1_NM_-|	94.2349	-3.28117	1.59748	-2.05397	0.039979	0.415742	0	1.05759	0	1.25137	1.05594	7.74175	140.248	132.199	277.516	173.94	107.706	288.104	0.576906	1.76377	-3.24821	-0.0509955	-3.19721	HEBP1	chr12:13137149:-	chr12_12984216_-
chr12:118472638-118472688:mpeak_51662|chr12_118472163_118499979_WSB2_NM_-|	124.723	-4.62116	1.65314	-2.79538	0.00518383	0.267856	0	0	0	3.7541	2.11189	9.4007	134.694	150.178	409.703	160.175	125.657	501.002	#DIV/0!	1.94027	-Inf	-0.179931	-Inf	WSB2	chr12:118472636:-	chr12_118034833_-
chr12:110880460-110880513:mpeak_50803|chr12_110873022_110888216_ARPC3_NM_-|	657.077	-4.40262	1.6618	-2.64931	0.00806575	0.273277	0	0	0	1.25137	0	9.4007	873.427	994.133	2096.44	1285.15	873.265	1751.85	#DIV/0!	0.408619	-Inf	0.019691	-Inf	ARPC3	chr12:110880456:-	-
chr12:108142365-108142419:mpeak_50544|chr12_108128299_108154914_PRDM4_NM_-|	157.889	-3.90257	1.36483	-2.85939	0.0042446	0.267856	0	0	1.54605	5.00546	3.16783	13.8246	263.833	300.355	476.956	299.076	185.846	345.061	0.445485	2.6504	-3.83071	0.327016	-4.15772	PRDM4	chr12:108142366:-	chr12_107748592_-
chr12:102542734-102542828:mpeak_50018|chr12_102513955_102589728_PARPBP_NM_+|	76.0048	-3.41739	1.70239	-2.00741	0.0447059	0.434562	0	0	0	0	1.05594	7.74175	72.207	79.3191	190.937	175.191	112.986	272.62	#DIV/0!	2.35317	-Inf	-0.711531	-Inf	PARPBP	chr12:102542785:+;chr12:102542831:+	chr12_102149006_+
chr12:102542574-102542624:mpeak_50017|chr12_102513955_102589728_PARPBP_NM_+|	76.0048	-3.41739	1.70239	-2.00741	0.0447059	0.434562	0	0	0	0	1.05594	7.74175	72.207	79.3191	190.937	175.191	112.986	272.62	#DIV/0!	2.35317	-Inf	-0.711531	-Inf	PARPBP	chr12:102542624:+;chr12:102542654:+	chr12_102148875_+
chr11:65824300-65824350:mpeak_35717|chr11_65819815_65836144_SF3B2_NM_+|	464.822	-4.41797	1.61915	-2.72857	0.00636098	0.268895	0	0	0	2.50273	0	11.6126	698.464	625.035	1137.89	942.279	756.055	1404.02	#DIV/0!	0.682483	-Inf	-0.333891	-Inf	SF3B2	chr11:65824362:+	-
chr11:65429002-65429057:mpeak_35638|chr11_65422471_65430443_RELA_NM_-|	460.931	-4.59454	1.61675	-2.84184	0.00448536	0.267856	0	0	0	1.25137	0	11.6126	988.681	892.605	822.498	1113.72	774.006	926.798	#DIV/0!	0.685587	-Inf	-0.0579096	-Inf	RELA	chr11:65429001:-	-
chr11:18370245-18370388:mpeak_32818|chr11_18343815_18387329_GTF2H1_NM_+|	79.4907	-2.78774	1.2531	-2.22468	0.0261029	0.353468	1.3886	1.05759	0.773024	6.25683	5.27971	11.6126	120.808	95.183	221.085	121.383	88.6992	280.362	0.736533	4.72005	-2.84618	-0.166204	-2.67998	GTF2H1	chr11:18370378:+	chr11_18348829_+
chr11:14628250-14628304:mpeak_32531|chr11_14526794_14665180_PSMA1_NM_-|	276.394	-4.07777	2.01271	-2.02601	0.0427637	0.428319	0	0	0	0	0	9.95368	195.792	224.209	1135.57	395.432	236.531	1119.24	#DIV/0!	1.70518	-Inf	-0.170897	-Inf	PSMA1	chr11:14628235:-	-
chr10:94326488-94326539:mpeak_27838|chr10_94214296_94333852_IDE_NM_-|	75.6197	-4.13464	1.6406	-2.5202	0.011729	0.288705	0	0	0	0	1.05594	10.5067	154.134	134.314	101.266	186.454	138.329	181.378	#DIV/0!	3.42656	-Inf	-0.377178	-Inf	IDE	chr10:94326485:-	chr10_92566731_-
chr10:76603288-76603345:mpeak_26573|chr10_76586170_76788246_KAT6B_NM_+|	238.873	-3.87716	1.50776	-2.57148	0.0101266	0.281797	1.3886	1.05759	0	1.25137	0	13.2716	645.697	700.124	530.294	389.175	297.776	286.445	0.195578	2.23798	-2.56973	0.946651	-3.51638	KAT6B	chr10:76603347:+	chr10_74843600_+
chr10:72580899-72580956:mpeak_25968|chr10_72575703_72636951_SGPL1_NM_+|	153.879	-2.89183	1.19291	-2.42419	0.0153428	0.299241	1.3886	2.11518	0	11.2623	4.22377	2.21193	279.108	331.025	463.041	264.038	201.685	286.445	0.48973	2.35293	-2.3366	0.512758	-2.84936	SGPL1	chr10:72580955:+	chr10_70821200_+
chr10:63833147-63833197:mpeak_25298|chr10_63661012_63850620_ARID5B_NM_+|	130.458	-4.13032	1.66842	-2.47559	0.0133015	0.292246	0	0	0	0	0	9.4007	258.279	235.842	250.46	261.535	285.105	264.878	#DIV/0!	3.47522	-Inf	-0.124195	-Inf	ARID5B	chr10:63833204:+	chr10_62073379_+
chr10:61820611-61820661:mpeak_25116|chr10_61789584_62493284_ANK3_NM_-|	222.068	-4.41752	1.49588	-2.95313	0.00314571	0.267856	0	0	0	5.00546	0	6.63579	295.771	430.438	596.775	392.929	444.552	492.707	#DIV/0!	1.31274	-Inf	-0.0078345	-Inf	ANK3	chr10:61820622:-	chr10_60060862_-
chr10:21169715-21169771:mpeak_22561|chr10_21074852_21463116_NEBL_NM_-|	144.354	-4.07023	1.6576	-2.45549	0.0140693	0.293546	0	0	0	1.25137	0	8.84772	173.575	195.654	419.752	284.06	247.091	402.018	#DIV/0!	1.62335	-Inf	-0.242148	-Inf	NEBL	chr10:21169719:-	chr10_20880793_-
chr1:53717773-53717921:mpeak_5392|chr1_53712728_53793821_LRP8_NM_-|	171.418	-2.48494	1.19113	-2.0862	0.0369601	0.401758	2.77719	1.05759	0	1.25137	4.22377	10.5067	412.413	287.664	326.989	415.454	298.832	295.846	0.560058	1.58215	-2.05921	0.0239872	-2.0832	LRP8	chr1:53717870:-	chr1_53252101_-;chr1_53252199_-
chr1:51394883-51394933:mpeak_5051|chr1_50907195_51425936_FAF1_NM_-|	73.8616	-3.69092	1.67559	-2.20276	0.0276119	0.361669	0	0	0	0	0	8.29473	115.254	154.408	108.996	172.689	154.168	172.53	#DIV/0!	4.98295	-Inf	-0.399263	-Inf	FAF1	chr1:51394877:-	chr1_50929211_-
chr1:44453338-44453473:mpeak_4490|chr1_44444873_44455969_B4GALT2_NM_+|	241.867	-4.22676	1.67301	-2.52645	0.0115223	0.288093	0	0	0	0	0	9.4007	499.895	432.554	500.92	624.432	404.426	430.773	#DIV/0!	1.93214	-Inf	-0.0261946	-Inf	B4GALT2	chr1:44453385:+;chr1:44453436:+	chr1_43987763_+
chr1:24742926-24742977:mpeak_2205|chr1_24742244_24795475_NIPAL3_NM_+|	66.0552	-4.24246	1.5535	-2.73091	0.00631595	0.268895	0	0	0	2.50273	0	7.18877	138.86	150.178	102.812	133.896	161.559	95.6659	#DIV/0!	3.71681	-Inf	0.002683	-Inf	NIPAL3	chr1:24742977:+	chr1_24416485_+
chr1:2162153-2162203:mpeak_293|chr1_2160133_2238015_SKI_NM_+|	99.8158	-4.23926	1.71595	-2.47051	0.0134921	0.293236	0	0	0	0	0	9.4007	198.569	134.314	261.282	202.721	175.287	216.216	#DIV/0!	4.74604	-Inf	-0.000142562	-Inf	SKI	chr1:2162198:+	chr1_2230764_+;chr1_2230801_+
chr1:19493919-19493970:mpeak_1598|chr1_19401390_19536746_UBR4_NM_-|	135.07	-4.64364	1.47449	-3.14931	0.00163655	0.267856	0	0	0	0	4.22377	8.84772	258.279	298.24	240.41	255.279	284.049	271.514	#DIV/0!	2.41813	-Inf	-0.0249682	-Inf	UBR4	chr1:19493945:-	-
chr1:192995920-192995972:mpeak_16642|chr1_192989586_193029237_UCHL5_NR_-mpeak_16642|chr1_192985525_193028523_UCHL5_NM_-||	131.915	-3.98973	1.6027	-2.48938	0.0127967	0.291257	0	0	0	0	1.05594	8.84772	226.341	180.848	289.884	380.415	254.482	241.1	#DIV/0!	1.69584	-Inf	-0.329618	-Inf	UCHL5	chr1:192995919:-	chr1_193026792_-
chr1:164648804-164648883:mpeak_14341|chr1_164528596_164815820_PBX1_NM_+|	536.04	-3.1276	1.22963	-2.54353	0.0109739	0.286729	0	3.17277	0	5.00546	6.33566	16.5895	699.853	807.998	1570.01	900.984	923.95	1498.58	0.30925	0.840393	-3.13803	-0.110782	-3.02725	PBX1	chr1:164648858:+	chr1_164679624_+
chr1:149981576-149981634:mpeak_12104|chr1_149916964_149982686_OTUD7B_NM_-|	147.963	-3.3146	1.12106	-2.95666	0.00310994	0.267856	0	3.17277	0	3.7541	9.50349	9.95368	333.263	278.146	369.505	275.301	193.238	299.716	0.970349	3.0213	-2.87101	0.352543	-3.22356	OTUD7B	chr1:149981557:-	chr1_150009613_-
chr1:1493935-1493985:mpeak_180|chr1_1477547_1510262_SSU72_NM_-|	650.066	-4.52828	1.64224	-2.75738	0.00582672	0.267856	0	0	0	1.25137	0	10.5067	1553.84	1408.71	939.224	1832	1182.66	872.606	#DIV/0!	0.453714	-Inf	0.00537499	-Inf	SSU72	chr1:1493933:-	chr1_1558555_-
chr1:118437469-118437523:mpeak_10374|chr1_118413238_118472302_GDAP2_NM_-|	80.795	-2.97933	1.48045	-2.01246	0.0441719	0.433229	1.3886	0	0.773024	1.25137	1.05594	9.4007	216.621	189.308	120.592	230.251	108.762	90.1361	0.615822	2.72819	-2.43731	0.295011	-2.73232	GDAP2	chr1:118437472:-	chr1_117894859_-
chr1:114969497-114969647:mpeak_9771|chr1_114940482_115053781_TRIM33_NM_-|	608.548	-4.7162	1.4303	-3.29734	0.000976044	0.267856	0	0	0	2.50273	2.11189	9.4007	1067.83	1275.45	1244.57	1444.08	1145.7	1110.94	#DIV/0!	0.378719	-Inf	-0.0446843	-Inf	TRIM33	chr1:114969604:-	-
chr1:109505612-109505662:mpeak_8739|chr1_109475123_109506121_CLCC1_NM_-|	115.268	-4.57931	1.50751	-3.03767	0.00238417	0.267856	0	0	0	3.7541	0	6.63579	198.569	228.439	325.443	246.519	162.615	211.239	#DIV/0!	2.51217	-Inf	0.278462	-Inf	CLCC1	chr1:109505604:-	chr1_108962993_-
chrX:2654411-2654479:mpeak_210321|chrX_2609227_2658819_CD99_NM_+|	82.2165	-4.6957	1.70797	-2.74929	0.00597247	0.268221	0	0	0	1.25137	7.3916	4.42386	80.5386	92.0102	343.223	87.5956	77.0838	293.081	#DIV/0!	2.85451	-Inf	0.17214	-Inf	CD99	-	chrX_2736437_+
chr9:88894657-88894740:mpeak_204859|chr9_88881106_88897490_ISCA1_NM_-|	98.8945	-2.0646	1.01763	-2.02884	0.042475	0.426641	1.3886	1.05759	3.0921	5.00546	4.22377	8.84772	165.243	180.848	313.848	165.18	114.042	223.958	0.839212	3.59254	-1.70664	0.391257	-2.0979	ISCA1	-	chr9_86279750_-
chr9:125784543-125784593:mpeak_208109|chr9_125703287_125865369_RABGAP1_NM_+|	454.832	-4.17299	1.663	-2.50931	0.0120966	0.289771	0	0	0	0	0	9.4007	863.707	788.961	993.336	874.705	766.614	1161.26	#DIV/0!	1.00629	-Inf	-0.0829415	-Inf	RABGAP1	-	chr9_123022359_+
chr9:111849275-111849325:mpeak_206852|chr9_111782785_111882225_TMEM245_NM_-|	334.05	-4.26971	1.43678	-2.97172	0.00296135	0.267856	0	0	0	2.50273	1.05594	7.74175	652.64	603.883	603.732	798.371	655.741	682.933	#DIV/0!	0.528787	-Inf	-0.200117	-Inf	TMEM245	-	chr9_109086947_-
chr8:26217671-26217746:mpeak_192722|chr8_26149006_26227649_PPP2R2A_NM_+|	267.831	-1.99465	0.971575	-2.05301	0.0400717	0.415976	1.3886	1.05759	2.31907	3.7541	5.27971	11.6126	592.931	430.438	485.459	636.945	481.51	561.277	0.315825	1.22915	-2.11527	-0.154803	-1.96046	PPP2R2A	-	chr8_26360188_+
chr8:17090215-17090265:mpeak_192043|chr8_17088357_17104387_CNOT7_NM_-|	333.73	-4.14878	1.70013	-2.44028	0.014676	0.295315	0	0	0	0	1.05594	9.95368	426.299	397.653	979.421	603.158	475.174	1112.05	#DIV/0!	0.753953	-Inf	-0.280483	-Inf	CNOT7	-	chr8_17232747_-
chr7:89999476-89999526:mpeak_186058|chr7_89975978_90014205_GTPBP10_NM_+|	39.8577	-3.18231	1.49817	-2.12413	0.0336597	0.386489	0	1.05759	0	1.25137	3.16783	6.0828	93.036	60.2825	65.707	115.126	72.8601	59.7221	1.44858	4.23967	-3.31181	-0.17754	-3.13427	GTPBP10	-	chr7_90370253_+
chr7:6306399-6306507:mpeak_181544|chr7_6204647_6312242_CYTH3_NM_-|	175.725	-2.94378	1.29598	-2.27148	0.023118	0.338837	0	6.34553	0	6.25683	2.11189	13.2716	565.159	597.537	258.963	271.546	282.993	104.514	1.33904	3.28354	-1.76991	1.10911	-2.87902	CYTH3	-	chr7_6266749_-
chr7:2849020-2849070:mpeak_181216|chr7_2771384_2883959_GNA12_NM_-|	163.772	-3.83197	1.78303	-2.14914	0.0316234	0.377744	0	0	0	0	0	8.29473	241.616	163.926	497.054	306.585	218.58	529.204	#DIV/0!	2.3601	-Inf	-0.224227	-Inf	GNA12	-	chr7_2809427_-
chr7:122282846-122282896:mpeak_188481|chr7_121960392_122526813_CADPS2_NM_-|	55.0566	-4.48497	1.65448	-2.7108	0.00671209	0.269946	0	0	0	2.50273	0	7.18877	87.4816	74.0312	194.802	77.5847	74.9719	142.116	#DIV/0!	4.93335	-Inf	0.274037	-Inf	CADPS2	-	chr7_122642793_-
chr6:17794891-17794941:mpeak_170243|chr6_17761108_17987854_KIF13A_NM_-|	112.725	-4.49454	1.48273	-3.03126	0.00243536	0.267856	0	0	0	1.25137	1.05594	7.18877	241.616	243.245	241.957	220.24	229.14	167.001	#DIV/0!	1.54062	-Inf	0.237772	-Inf	KIF13A	-	chr6_17794663_-
chr6:170861900-170861956:mpeak_180842|chr6_170844493_170862417_PSMB1_NM_-|	1462.78	-4.08406	1.52612	-2.67612	0.00744803	0.271992	0	0	0	2.50273	1.05594	7.74175	1998.19	1841.26	3862.8	3183.48	2193.19	4463.12	#DIV/0!	0.114844	-Inf	-0.353347	-Inf	PSMB1	-	chr6_170552798_-
chr6:152409947-152410106:mpeak_179744|chr6_152011630_152419866_ESR1_NM_+|	1581.61	-1.45911	0.67558	-2.15979	0.0307893	0.373891	16.6632	41.2459	31.694	20.0219	41.1818	48.6624	3643.68	4153.15	5176.17	1625.52	1968.28	2213.03	0.690689	1.89201	-0.294125	1.15969	-1.45381	ESR1	-	chr6_152088892_+
chr6:150183017-150183067:mpeak_179175|chr6_150141839_150185480_LRP11_NM_-|	167.358	-1.85747	0.946425	-1.96262	0.0496901	0.455005	4.16579	3.17277	0	5.00546	3.16783	6.63579	326.32	441.014	426.709	282.809	233.363	275.938	0.921895	1.86957	-1.01291	0.592083	-1.605	LRP11	-	chr6_149861864_-
chr6:128794741-128794791:mpeak_177623|chr6_128291425_128841819_PTPRK_NM_-|	157.588	-4.0084	1.82417	-2.19739	0.027993	0.363459	0	0	0	0	0	9.95368	151.357	219.978	479.275	272.798	231.251	526.439	#DIV/0!	2.89776	-Inf	-0.276758	-Inf	PTPRK	-	chr6_128473582_-
chr4:84194565-84194617:mpeak_150912|chr4_84185516_84206067_COQ2_NM_-|	125.914	-4.38351	1.78383	-2.45736	0.0139963	0.293546	0	0	0	0	0	11.0596	177.74	201.999	357.137	250.273	172.119	340.637	#DIV/0!	4.34832	-Inf	-0.0503143	-Inf	COQ2	-	chr4_83273414_-
chr4:56410985-56411149:mpeak_149649|chr4_56301761_56413076_CLOCK_NM_-|	109.581	-4.36688	1.51112	-2.88984	0.00385441	0.267856	0	1.05759	0	0	7.3916	4.42386	212.455	206.23	432.12	167.683	118.266	165.342	0.372913	3.92723	-3.48183	0.914773	-4.3966	CLOCK	-	chr4_55544925_-
chr4:170557257-170557307:mpeak_156241|chr4_170541671_170641057_CLCN3_NM_+|	109.424	-3.51377	1.72591	-2.0359	0.0417603	0.422635	1.3886	0	0	1.25137	0	13.2716	143.025	158.638	276.743	218.989	142.552	357.227	0.720219	3.0308	-3.38663	-0.313443	-3.07319	CLCN3	-	chr4_169636156_+
chr4:144470120-144470170:mpeak_154843|chr4_144434615_144474271_SMARCA5_NM_+|	130.713	-4.02679	1.89115	-2.12928	0.0332313	0.385888	0	0	0	0	2.11189	7.18877	68.0412	103.644	578.222	162.678	135.161	511.509	#DIV/0!	1.72373	-Inf	-0.110047	-Inf	SMARCA5	-	chr4_143549038_+
chr4:123092367-123092576:mpeak_153664|chr4_123091757_123283185_KIAA1109_NM_+|	89.1183	-2.87609	1.32255	-2.17465	0.0296562	0.369152	0	3.17277	0	7.5082	1.05594	15.4835	106.922	208.345	180.888	182.699	151	212.345	1.91841	4.40397	-2.92208	-0.138229	-2.78385	KIAA1109	-	chr4_122171415_+
chr3:66546519-66546571:mpeak_136894|chr3_66430913_66550845_LRIG1_NM_-|	79.5133	-3.45588	1.27344	-2.71382	0.00665122	0.269946	0	2.11518	0	3.7541	6.33566	7.74175	154.134	156.523	201.759	128.891	108.762	184.143	1.23835	4.22752	-3.07558	0.280772	-3.35635	LRIG1	-	chr3_66496095_-
chr3:39450232-39450291:mpeak_134355|chr3_39448179_39453764_RPSA_NM_+|	1160.05	-2.36926	1.18212	-2.00425	0.0450432	0.435775	1.3886	3.17277	0	1.25137	3.16783	14.3775	2266.19	2334.1	2544.02	2516.5	1820.45	2415.98	0.0957691	0.27835	-2.04295	0.0812826	-2.12423	RPSA	-	chr3_39408769_+;chr3_39408816_+
chr3:193353185-193353259:mpeak_145465|chr3_193310932_193412394_OPA1_NM_+|	78.4412	-3.15895	1.33642	-2.36374	0.0180913	0.313389	0	2.11518	0	7.5082	8.44754	4.97684	102.756	104.701	226.496	150.164	114.042	220.087	1.46226	4.3223	-3.3069	-0.158339	-3.14856	OPA1	-	chr3_193635446_+;chr3_193635484_+
chr3:156265740-156265801:mpeak_142761|chr3_156261058_156272989_SSR3_NM_-|	789.197	-3.18788	1.55463	-2.05057	0.0403093	0.417152	0	1.05759	0	0	3.16783	7.74175	1162.26	1011.05	2132	1972.15	976.747	2204.19	0.0736942	0.317564	-3.36675	-0.25932	-3.10743	SSR3	-	chr3_156547972_-
chr22:46161493-46161543:mpeak_131127|chr22_46067677_46239548_ATXN10_NM_+|	165.744	-4.19905	1.64045	-2.5597	0.0104762	0.28376	0	0	0	0	1.05594	8.29473	230.507	250.648	498.601	330.361	225.972	443.492	#DIV/0!	1.40285	-Inf	-0.0292519	-Inf	ATXN10	-	chr22_45765672_+
chr22:34095136-34095186:mpeak_129921|chr22_33670610_34316416_LARGE_NM_-|	58.1855	-2.06267	1.02012	-2.02199	0.0431777	0.429763	4.16579	1.05759	0.773024	2.50273	3.16783	7.18877	143.025	129.026	143.009	101.361	85.5314	77.4175	1.4447	4.86525	-1.10065	0.651094	-1.75174	LARGE	-	chr22_33699150_-
chr21:40573651-40573749:mpeak_127255|chr21_40569341_40685712_BRWD1_NM_-|	342.458	-4.61287	1.67623	-2.75193	0.00592447	0.267856	1.3886	0	0	2.50273	0	18.8014	828.992	727.621	673.304	729.546	692.699	434.644	0.186814	1.72095	-3.93943	0.264102	-4.20354	BRWD1	-	chr21_39201708_-
chr20:52582178-52582328:mpeak_124768|chr20_52561535_52687304_BCAS1_NM_-|	314.128	-4.04264	1.53376	-2.63577	0.00839474	0.273381	1.3886	0	0	2.50273	2.11189	11.0596	622.091	902.123	426.709	561.863	877.488	362.203	0.213529	0.870041	-3.4967	0.114914	-3.61161	BCAS1	-	chr20_53965728_-
chr20:47342931-47342981:mpeak_123987|chr20_47242465_47444420_PREX1_NM_-|	762.065	-5.46114	1.86498	-2.92826	0.00340866	0.267856	0	0	0	0	0	8.84772	980.349	1274.39	4295.69	634.443	534.307	1416.74	#DIV/0!	1.02662	-Inf	1.34115	-Inf	PREX1	-	chr20_48726380_-
chr20:46390152-46390264:mpeak_123868|chr20_46287136_46415360_SULF2_NM_-|	597.315	-2.22009	0.94603	-2.34674	0.0189383	0.315087	0	4.23035	1.54605	3.7541	6.33566	13.8246	1148.37	1365.35	1224.47	1111.21	1251.29	1037.39	0.231786	0.703383	-2.04963	0.136846	-2.18648	SULF2	-	chr20_47761470_-
chr2:29005586-29005636:mpeak_104851|chr2_28974613_29022064_PPP1CB_NM_+|	235.027	-3.57043	1.68736	-2.11599	0.0343458	0.388709	0	1.05759	0	1.25137	3.16783	7.74175	202.735	215.748	1001.84	327.858	269.265	789.659	0.223383	0.876918	-3.52341	0.0344773	-3.55788	PPP1CB	-	chr2_28782823_+
chr2:178096854-178097008:mpeak_115640|chr2_178096736_178129859_NFE2L2_NM_-|	119.679	-3.84743	1.54888	-2.48401	0.0129912	0.29152	1.3886	0	0	0	3.16783	10.5067	191.626	213.633	324.67	235.257	181.622	274.279	0.570711	2.96773	-3.29979	0.0787408	-3.37853	NFE2L2	-	chr2_177232102_-
chr18:706487-706591:mpeak_92257|chr18_674406_712662_ENOSF1_NM_-|	66.8558	-3.60584	1.57386	-2.29107	0.0219592	0.33213	0	0	0.773024	0	1.05594	8.84772	138.86	141.717	147.648	121.383	133.049	108.938	0.541556	4.08827	-3.67938	0.236931	-3.91631	ENOSF1	-	chr18_706529_-
chr17:65887920-65887970:mpeak_90556|chr17_65821779_65978367_BPTF_NM_+|	97.2455	-3.65533	1.63334	-2.23796	0.0252239	0.349195	0	1.05759	0	1.25137	1.05594	7.18877	112.476	145.947	401.973	118.88	140.44	236.676	0.480434	1.91455	-3.16655	0.413001	-3.57955	BPTF	-	chr17_67891901_+
chr17:57274894-57274946:mpeak_88392|chr17_57232859_57278923_PRR11_NM_+|	1619.37	-4.37013	1.56632	-2.79006	0.00526983	0.267856	0	0	0	0	1.05594	9.95368	3486.77	2905.2	2973.05	3701.54	3035.84	3319	#DIV/0!	0.164219	-Inf	-0.102758	-Inf	PRR11	-	chr17_59197552_+
chr17:5295827-5295877:mpeak_82695|chr17_5289589_5323059_NUP88_NM_-|	46.0153	-3.77048	1.68617	-2.23612	0.025344	0.350027	0	0	0	1.25137	0	7.74175	62.4868	53.937	119.819	121.383	63.3566	122.209	#DIV/0!	4.39477	-Inf	-0.377726	-Inf	NUP88	-	chr17_5392506_-
chr17:39681522-39681594:mpeak_86219|chr17_39680249_39684641_KRT19_NM_-|	3423.27	-2.28113	1.08103	-2.11016	0.034845	0.390985	1.3886	1.05759	0.773024	6.25683	5.27971	3.31789	8223.27	6864.81	6008.72	7702.16	6330.38	5931.84	0.0152592	0.0744047	-2.20612	0.0795956	-2.28571	KRT19	-	chr17_41525213_-
chr16:24788576-24788687:mpeak_76874|chr16_24741048_24834752_TNRC6A_NM_+mpeak_76874|chr16_24741048_24834752_TNRC6A_NM_+||	511.649	-3.27352	1.30387	-2.51061	0.0120524	0.289771	1.3886	1.05759	0	1.25137	9.50349	2.76491	1102.55	1126.33	1464.11	750.82	687.419	992.603	0.099358	0.556176	-2.46646	0.603331	-3.0698	TNRC6A	-	chr16_24777344_+
chr15:89802652-89802704:mpeak_73006|chr15_89787193_89859627_FANCI_NM_+|	128.682	-3.55031	1.42413	-2.49296	0.0126682	0.291257	1.3886	0	0	5.00546	2.11189	10.5067	229.118	170.272	225.723	292.82	267.154	340.084	0.666406	1.9581	-3.66584	-0.525899	-3.13994	FANCI	-	chr15_89259471_+
chr15:72645744-72645842:mpeak_71323|chr15_72636481_72668520_HEXA_NM_-|	154.268	-2.98677	1.10505	-2.70284	0.00687496	0.269946	1.3886	2.11518	0	2.50273	7.3916	8.84772	298.548	341.601	374.917	252.776	236.531	324.601	0.517765	2.30272	-2.4193	0.318636	-2.73793	HEXA	-	chr15_72353427_-
chr15:60665185-60665245:mpeak_69867|chr15_60639888_60690185_ANXA2_NM_-|	535.238	-2.56712	1.27637	-2.01127	0.0442967	0.433291	0	2.11518	0	1.25137	5.27971	7.18877	891.479	878.856	1108.52	1124.98	958.796	1444.39	0.220419	0.388867	-2.69741	-0.293424	-2.40399	ANXA2	-	chr15_60372986_-
chr15:52312761-52312812:mpeak_69064|chr15_52311410_52356098_MAPK6_NM_+|	626.159	-4.8685	1.59046	-3.06107	0.00220548	0.267856	0	0	0	0	2.11189	9.4007	1252.51	997.306	1978.17	1362.74	676.859	1234.81	#DIV/0!	0.52739	-Inf	0.368738	-Inf	MAPK6	-	chr15_52020614_+
chr15:25651596-25651646:mpeak_66850|chr15_25584404_25684175_UBE3A_NM_-|	158.902	-4.26675	1.75605	-2.42974	0.0151096	0.29812	0	0	0	0	0	9.95368	231.896	249.591	455.311	315.344	211.189	433.538	#DIV/0!	3.1103	-Inf	-0.0354035	-Inf	UBE3A	-	chr15_25406472_-
chr14:81681579-81681629:mpeak_64697|chr14_81646674_81687575_GTF2A1_NM_-|	105.17	-3.9608	1.89773	-2.08713	0.0368766	0.40126	0	0	0	0	0	9.95368	116.642	90.9526	351.726	185.202	129.881	377.687	#DIV/0!	4.31038	-Inf	-0.308701	-Inf	GTF2A1	-	chr14_81215205_-
chr14:105934205-105934255:mpeak_66666|chr14_105886185_105936401_MTA1_NM_+|	226.776	-4.56158	1.88766	-2.41652	0.0156696	0.300222	0	0	0	0	0	10.5067	237.45	289.779	930.721	317.847	258.706	676.297	#DIV/0!	2.51586	-Inf	0.218727	-Inf	MTA1	-	chr14_105467922_+
chr14:102379499-102379612:mpeak_66060|chr14_102228134_102391477_PPP2R5C_NM_+|	95.2457	-4.11326	1.72265	-2.38775	0.016952	0.307683	0	0	0	1.25137	0	9.4007	115.254	120.565	280.608	158.923	136.217	320.73	#DIV/0!	2.5944	-Inf	-0.254063	-Inf	PPP2R5C	-	chr14_101913214_+
chr13:47161823-47161873:mpeak_56008|chr13_47127295_47324674_LRCH1_NM_+|	122.94	-3.98182	1.70572	-2.33439	0.0195752	0.317598	0	0	0	0	0	9.95368	198.569	248.533	200.986	271.546	212.245	333.448	#DIV/0!	3.65389	-Inf	-0.334567	-Inf	LRCH1	-	chr13_46587701_+
chr13:31725910-31725975:mpeak_54575|chr13_31711661_31736525_HSPH1_NM_-|	1698.38	-3.90979	1.66856	-2.34322	0.0191181	0.315197	0	0	0	0	0	9.4007	2785.52	2463.12	3727.52	4466.13	2872.16	4056.68	#DIV/0!	0.247496	-Inf	-0.344225	-Inf	HSPH1	-	chr13_31151740_-
chr13:31719851-31719914:mpeak_54564|chr13_31711661_31736525_HSPH1_NM_-|	1704.14	-1.8679	0.888712	-2.1018	0.0355706	0.394658	4.16579	6.34553	3.86512	7.5082	16.8951	39.8147	2785.52	2463.12	3727.52	4466.13	2872.16	4056.68	0.160162	0.563565	-2.15927	-0.344225	-1.81505	HSPH1	-	chr13_31145739_-;chr13_31145764_-
chr12:64447596-64447664:mpeak_46925|chr12_64238540_64536074_SRGAP1_NM_+|	173.435	-3.90671	1.67005	-2.33928	0.0193211	0.316393	0	1.05759	0	0	0	10.5067	456.848	378.617	366.413	286.563	326.286	254.925	0.263984	3.63228	-3.31245	0.4699	-3.78235	SRGAP1	-	chr12_64053865_+
chr12:27115822-27115872:mpeak_42917|chr12_27091304_27117528_FGFR1OP2_NM_+|	74.4683	-3.12299	1.53671	-2.03225	0.042128	0.424846	1.3886	0	0	1.25137	4.22377	6.63579	91.6474	86.7222	199.44	133.896	114.042	254.372	1.10262	2.41105	-3.12461	-0.410917	-2.71369	FGFR1OP2	-	chr12_26962975_+
chr12:122741481-122741531:mpeak_52281|chr12_122716974_122751068_VPS33A_NM_-|	118.228	-4.24367	1.60751	-2.6399	0.0082931	0.273381	0	0	0	0	1.05594	7.74175	309.657	245.361	170.838	315.344	200.629	168.107	#DIV/0!	1.92909	-Inf	0.085518	-Inf	VPS33A	-	chr12_122256934_-
chr12:118508431-118508481:mpeak_51688|chr12_118504499_118541810_VSIG10_NM_-|	213.316	-3.53107	1.50613	-2.34446	0.0190549	0.315161	0	1.05759	0	2.50273	0	8.84772	376.31	491.779	410.476	445.486	398.09	425.243	0.248151	1.34185	-3.4239	0.0110369	-3.43494	VSIG10	-	chr12_118070603_-
chr11:43421177-43421317:mpeak_33873|chr11_43380434_43515322_TTC17_NM_+|	119.05	-3.80364	1.59017	-2.39198	0.0167579	0.306754	0	1.05759	0	0	1.05594	10.5067	291.605	230.554	243.503	241.514	206.965	201.839	0.414382	2.66699	-3.45062	0.235565	-3.68618	TTC17	-	chr11_43399789_+
chr11:118234877-118234927:mpeak_39763|chr11_118230295_118267028_UBE4A_NM_+|	132.618	-3.38592	1.64254	-2.06139	0.039266	0.412293	1.3886	0	0	3.7541	0	9.4007	134.694	160.753	418.979	246.519	212.245	403.677	0.583096	2.28795	-3.24389	-0.27164	-2.97225	UBE4A	-	chr11_118364219_+
chr10:81112233-81112293:mpeak_26806|chr10_81107219_81113462_PPIF_NM_+|	221.484	-2.81674	1.35584	-2.07748	0.0377574	0.406088	4.16579	3.17277	0	10.0109	5.27971	26.5431	193.015	223.151	960.096	305.333	193.238	733.807	0.799836	3.39456	-2.5111	0.15931	-2.67041	PPIF	-	chr10_79352557_+
chr10:32578972-32579044:mpeak_23668|chr10_32558063_32667726_EPC1_NM_-|	149.196	-3.24123	1.5356	-2.11073	0.0347955	0.390684	0	2.11518	0	0	2.11189	13.2716	223.564	249.591	476.183	309.087	253.426	261.008	0.668417	2.80201	-2.86253	0.205115	-3.06765	EPC1	-	chr10_32290055_-
chr10:133784456-133784506:mpeak_31118|chr10_133782073_133795517_BNIP3_NM_-|	247.489	-3.26421	1.65334	-1.97431	0.0483466	0.450068	2.77719	0	0	0	1.05594	10.5067	367.978	369.098	1113.15	329.109	202.741	573.443	0.450299	1.56917	-2.05777	0.743277	-2.80104	BNIP3	-	chr10_131970866_-;chr10_131970934_-
chr1:29416356-29416409:mpeak_2796|chr1_29213602_29443330_EPB41_NM_+|	91.4483	-2.21977	1.01076	-2.19613	0.0280826	0.363512	2.77719	2.11518	0	3.7541	5.27971	6.0828	231.896	192.481	174.703	157.672	165.783	154.835	1.22497	3.16055	-1.62753	0.324863	-1.95239	EPB41	-	chr1_29089895_+
chr1:21112048-21112142:mpeak_1766|chr1_21071584_21113181_HP1BP3_NM_-|	215.612	-4.1771	1.89309	-2.2065	0.027349	0.360443	0	1.05759	0	0	0	16.5895	288.828	299.298	778.435	306.585	265.042	631.506	0.232172	4.13657	-3.97142	0.183755	-4.15517	HP1BP3	-	chr1_20785600_-
chr1:154577087-154577202:mpeak_13118|chr1_154557519_154600456_ADAR_NM_-|	593.989	-3.98249	1.40599	-2.83251	0.0046184	0.267856	0	1.05759	0	3.7541	6.33566	4.97684	1152.54	1062.88	1617.94	1026.12	759.223	1493.05	0.0827674	0.459572	-3.8325	0.225616	-4.05812	ADAR	-	chr1_154604684_-
chr1:151641787-151641838:mpeak_12732|chr1_151584661_151666068_SNX27_NM_+|	283.686	-3.43458	1.46375	-2.34643	0.0189544	0.315087	1.3886	0	0	6.25683	0	6.63579	508.226	454.763	644.702	560.612	476.23	745.42	0.259116	1.08508	-3.21485	-0.148719	-3.06613	SNX27	-	chr1_151669362_+
chr1:117182785-117182835:mpeak_10117|chr1_117120184_117210377_IGSF3_NM_-|	575.789	-3.86838	1.50017	-2.57863	0.00991929	0.280654	0	1.05759	0	2.50273	1.05594	8.29473	1073.39	980.384	1768.68	905.989	761.335	1406.79	0.0830035	0.385588	-3.48645	0.314328	-3.80078	IGSF3	-	chr1_116640167_-
chr1:109469635-109469685:mpeak_8709|chr1_109419602_109472322_GPSM2_NM_+|	81.9755	-3.54155	1.7642	-2.00746	0.0447008	0.434562	0	1.05759	0	0	3.16783	14.3775	63.8754	78.2615	253.552	158.923	112.986	297.504	0.801833	4.62196	-4.05224	-0.525111	-3.52713	GPSM2	-	chr1_108927088_+
chrX:3739265-3739348:mpeak_210395|chrX_3735819_3761935_LOC389906_NR_-|	18.4846	3.80036	1.93504	1.96398	0.0495329	0.454684	0	0	13.1414	0	0	0	36.1035	53.937	49.4735	27.5301	20.0629	21.5663	28.2582	#DIV/0!	Inf	1.01242	Inf	LOC389906	chrX:3739333:-	-
chrX:15820026-15820076:mpeak_210787|chrX_15808573_15840853_ZRSR2_NM_+|	72.9708	3.52248	1.76623	1.99435	0.0461138	0.440414	0	0	11.5954	1.25137	0	0	198.569	175.56	81.9405	183.951	129.881	92.901	7.62736	0.922989	3.21197	0.165172	3.0468	ZRSR2	chrX:15820077:+	chrX_15801953_+
chr9:96032020-96032070:mpeak_205383|chr9_95947211_96082648_WNK2_NM_+|	4.31954	4.72384	2.05954	2.29365	0.0218109	0.331769	6.94298	0	10.8223	0	1.05594	0	4.16579	3.17277	6.18419	3.7541	6.33566	9.4007	197.06	16.2532	4.07246	-0.527379	4.59984	WNK2	chr9:96032071:+	chr9_93269792_+
chr9:94050835-94050885:mpeak_205108|chr9_93976707_94124251_AUH_NM_-|	9.1939	4.00389	1.66208	2.40896	0.0159979	0.301916	1.3886	3.17277	8.50326	2.50273	0	0	6.94298	13.7486	8.50326	21.2732	10.5594	33.7319	44.7497	11.4516	2.38409	-1.1672	3.55129	AUH	chr9:94050834:-	chr9_91288505_-;chr9_91288553_-
chr9:22030993-22031048:mpeak_202431|chr9_21994789_22120502_CDKN2B-AS1_NR_+|	4.87466	4.67814	2.00144	2.33739	0.019419	0.316709	6.94298	1.05759	12.3684	1.25137	0	0	1.3886	4.23035	10.8223	6.25683	4.22377	9.95368	123.889	18.3716	4.0248	-0.313668	4.33846	CDKN2B-AS1	chr9:22031044:+	chr9_22031044_+
chr9:140151637-140151750:mpeak_210084|chr9_140149758_140167233_NELFB_NM_+|	307.351	1.5012	0.708801	2.11795	0.0341794	0.387987	33.3263	31.7277	41.7433	25.0273	16.8951	8.29473	442.962	453.705	651.659	611.918	487.846	883.113	6.89759	2.53254	1.08862	-0.356884	1.44551	NELFB	chr9:140151700:+;chr9:140151729:+	chr9_137257242_+;chr9_137257291_+;chr9_137257312_+
chr9:135266442-135266493:mpeak_209585|chr9_135251555_135282238_TTF1_NM_-|	24.3776	4.79725	1.6321	2.93932	0.00328937	0.267856	1.3886	2.11518	10.0493	0	0	0	30.5491	35.958	75.7564	53.8087	35.9021	47.0035	9.52675	#DIV/0!	Inf	0.0574014	Inf	TTF1	chr9:135266441:-	-
chr9:132274898-132274968:mpeak_209188|chr9_132250938_132275697_LINC00963_NR_+|	15.956	3.21835	1.30725	2.46192	0.0138194	0.293236	23.6061	11.6335	47.1545	12.5137	19.007	32.626	0	1.05759	3.86512	13.765	6.33566	19.9074	1115.84	160.334	0.361168	-3.02277	3.38393	LINC00963	chr9:132274958:+	chr9_129512669_+
chr9:132266661-132266821:mpeak_209181|chr9_132250938_132275697_LINC00963_NR_+|	50.65	2.50456	1.00882	2.48266	0.0130407	0.29152	76.3728	103.644	69.5722	112.623	106.65	94.007	0	1.05759	3.86512	13.765	6.33566	19.9074	3380.1	783.043	-0.327901	-3.02277	2.69486	LINC00963	chr9:132266824:+	chr9_129504542_+
chr9:132260221-132260440:mpeak_209177|chr9_132250938_132275697_LINC00963_NR_+|	7.93763	3.20046	1.5009	2.13236	0.0329773	0.384643	11.1088	11.6335	5.41117	1.25137	13.7273	7.18877	0	1.05759	3.86512	13.765	6.33566	19.9074	381.273	55.4073	0.344871	-3.02277	3.36764	LINC00963	chr9:132260268:+	-
chr8:118543009-118543109:mpeak_198922|chr8_118532951_118552121_MED30_NM_+|	28.188	2.64201	1.03092	2.56277	0.0103842	0.283679	5.55439	8.46071	15.4605	6.25683	5.27971	3.31789	19.4404	25.3821	29.3749	50.0546	36.958	132.716	39.7259	6.76036	0.988626	-1.56628	2.55491	MED30	chr8:118543084:+	chr8_117530844_+
chr7:98479371-98479519:mpeak_186716|chr7_98476112_98609693_TRRAP_NM_+|	213.362	3.63821	1.61498	2.25279	0.0242725	0.34431	738.733	479.088	204.851	563.115	395.979	167.001	1.3886	0	0	2.50273	1.05594	6.63579	34151.3	11046.1	0.337276	-2.87609	3.21336	TRRAP	chr7:98479507:+	chr7_98881783_+;chr7_98881804_+;chr7_98881884_+
chr7:32981624-32981778:mpeak_183085|chr7_32957154_32982782_RP9P_NR_-|	53.6056	2.11071	0.948905	2.22437	0.0261239	0.353468	8.33158	5.28794	4.63814	2.50273	3.16783	1.10596	58.3211	81.4343	105.904	142.656	119.322	110.596	7.4321	1.81884	1.42988	-0.600865	2.03075	RP9P	chr7:32981630:-	-
chr7:158529924-158529997:mpeak_191443|chr7_158526943_158622319_ESYT2_NM_-|	117.373	3.16332	1.14387	2.76546	0.00568423	0.267856	4.16579	4.23035	18.5526	2.50273	3.16783	0.552982	106.922	115.277	271.331	242.765	261.874	377.134	5.4604	0.705799	2.11441	-0.837268	2.95168	ESYT2	chr7:158529901:-;chr7:158529929:-	chr7_158737238_-;chr7_158737266_-
chr7:1489155-1489213:mpeak_181024|chr7_1474308_1499109_MICALL2_NM_-|	32.3352	3.06502	1.07835	2.84232	0.00447861	0.267856	4.16579	7.40312	18.5526	1.25137	2.11189	1.10596	65.264	56.0522	43.2893	71.3279	64.4125	53.0863	18.2992	2.36684	2.7527	-0.198049	2.95075	MICALL2	chr7:1489153:-	chr7_1449507_-
chr7:141325602-141325657:mpeak_190257|chr7_141251077_141352586_AGK_NM_+|	33.4146	3.96491	1.61023	2.46233	0.0138038	0.293236	1.3886	1.05759	12.3684	0	1.05594	0	45.8237	60.2825	90.4438	52.5574	59.1328	76.8645	7.5373	1.68006	3.81041	0.0599135	3.7505	AGK	chr7:141325658:+	chr7_141625852_+
chr7:129274441-129274493:mpeak_188999|chr7_129251542_129394857_NRF1_NM_+mpeak_188999|chr7_129251542_129394857_NRF1_NM_+||	42.1317	2.06643	0.983682	2.10071	0.0356668	0.394994	8.33158	5.28794	19.3256	1.25137	4.22377	3.31789	93.036	68.7432	56.4308	107.617	86.5873	51.4273	15.0979	3.57976	1.90563	-0.170782	2.07641	NRF1	chr7:129274493:+	chr7_129634651_+
chr7:116409882-116409958:mpeak_188301|chr7_116312458_116435940_MET_NM_+|	54.3912	1.90495	0.831503	2.29097	0.0219652	0.33213	6.94298	6.34553	11.5954	11.2623	7.3916	3.31789	51.3781	60.2825	38.6512	177.694	146.776	131.057	16.5548	4.82338	0.179559	-1.59958	1.77914	MET	chr7:116409934:+;chr7:116409960:+	chr7_116769904_+
chr7:111174151-111174201:mpeak_188111|chr7_110303777_111202573_IMMP2L_NM_-|	18.9295	5.10435	1.89324	2.69609	0.0070159	0.269946	0	1.05759	13.9144	0	0	0	29.1605	24.3245	48.7005	23.776	24.2867	61.934	21.9777	#DIV/0!	Inf	-0.106268	Inf	IMMP2L	chr7:111174148:-	-
chr7:104742879-104742938:mpeak_187529|chr7_104654636_104752271_KMT2E_NM_+|	22.8461	4.21828	1.92153	2.19526	0.0281446	0.363812	0	0	15.4605	0	1.05594	0	27.7719	34.9004	58.7498	31.2841	61.2447	43.6856	38.1985	2.32562	3.87198	-0.165848	4.03783	KMT2E	chr7:104742933:+	chr7_105102483_+
chr6:118015795-118015845:mpeak_176869|chr6_117996616_118028087_NUS1_NM_+|	77.287	5.24981	2.04018	2.5732	0.0100762	0.28147	0	0	20.0986	0	0	0	105.533	76.1464	294.522	116.377	79.1957	235.57	12.6618	#DIV/0!	Inf	0.143406	Inf	NUS1	chr6:118015848:+	-
chr5:65316714-65316917:mpeak_160180|chr5_65222381_65374250_ERBB2IP_NM_+|	147.685	2.7165	1.21223	2.2409	0.0250322	0.347221	0	5.28794	25.5098	2.50273	2.11189	1.65895	205.512	241.13	327.762	314.093	275.601	371.051	5.96543	0.65299	2.29547	-0.311066	2.60653	ERBB2IP	chr5:65316772:+;chr5:65316878:+	chr5_66020942_+;chr5_66021049_+
chr5:16672601-16672651:mpeak_157942|chr5_16666902_16936385_MYO10_NM_-|	109.293	4.77141	1.83272	2.60346	0.00922887	0.277682	0	0	12.3684	0	0	0	148.58	168.157	326.989	172.689	140.44	342.296	5.76413	#DIV/0!	Inf	-0.0259848	Inf	MYO10	chr5:16672600:-	-
chr5:148883179-148883323:mpeak_166879|chr5_148876423_148931115_CSNK1A1_NM_-|	131.322	2.61087	1.18157	2.20967	0.0271279	0.359269	9.72018	14.8062	47.1545	2.50273	5.27971	6.0828	87.4816	131.141	459.176	197.716	142.552	472.247	10.5755	1.70646	2.37011	-0.261537	2.63165	CSNK1A1	chr5:148883183:-;chr5:148883272:-	chr5_149503621_-;chr5_149503710_-
chr5:138650673-138650823:mpeak_165957|chr5_138609440_138665033_MATR3_NM_+|	135.379	2.79922	1.31059	2.13585	0.032692	0.383314	1.3886	9.5183	35.5591	3.7541	1.05594	2.21193	129.139	155.465	498.601	230.251	171.063	386.535	5.9328	0.891284	2.72623	-0.00852771	2.73476	MATR3	chr5:138650823:+	chr5_139315130_+
chr5:131077021-131077071:mpeak_165035|chr5_130980456_131132756_FNIP1_NM_-|	90.486	4.54207	1.80062	2.5225	0.0116523	0.288136	0	0	15.4605	0	0	0	216.621	186.136	226.496	150.164	149.944	141.01	7.37088	#DIV/0!	Inf	0.512474	Inf	FNIP1	chr5:131077020:-	chr5_131741328_-
chr5:107714978-107715037:mpeak_163438|chr5_107197561_107717799_FBXL17_NM_-|	74.459	3.97563	1.33772	2.97195	0.00295912	0.267856	5.55439	5.28794	13.9144	1.25137	1.05594	0	97.2018	102.586	212.582	117.628	135.161	201.286	6.00354	0.762201	3.42354	-0.138992	3.56253	FBXL17	chr5:107714982:-	chr5_108379284_-
chr5:102432422-102432533:mpeak_163003|chr5_102423876_102455842_GIN1_NM_-|	5.43056	4.08948	1.86434	2.19353	0.0282693	0.3643	2.77719	6.34553	12.3684	3.7541	1.05594	0	0	4.23035	4.63814	3.7541	6.33566	19.9074	161.554	24.0525	2.15962	-1.75806	3.91768	GIN1	chr5:102432474:-	chr5_103096745_-
chr4:88930853-88930903:mpeak_151319|chr4_88928798_88996609_PKD2_NM_+|	34.2339	5.88884	1.5929	3.69693	0.000218219	0.257152	0	3.17277	11.5954	0	0	0	41.6579	46.5339	51.0196	76.3333	88.6992	91.7951	15.9126	#DIV/0!	Inf	-0.883523	Inf	PKD2	chr4:88930907:+	chr4_88009687_+;chr4_88009751_+
chr4:83618917-83619061:mpeak_150802|chr4_83552670_83720010_SCD5_NM_-|	51.7625	3.57589	1.15157	3.10523	0.00190129	0.267856	8.33158	6.34553	11.5954	1.25137	3.16783	0	56.9325	47.5915	116.727	95.1038	108.762	165.342	11.8745	1.79541	2.5717	-0.738751	3.31045	SCD5	chr4:83619006:-	chr4_82697854_-
chr4:8008733-8008809:mpeak_147131|chr4_7968830_8160559_ABLIM2_NM_-|	6.3219	4.6756	2.25258	2.07567	0.0379248	0.407388	5.55439	10.5759	36.3321	3.7541	2.11189	0	4.16579	1.05759	0	1.25137	0	11.0596	669.585	47.6483	3.16084	-1.23689	4.39773	ABLIM2	chr4:8008752:-	chr4_8007010_-;chr4_8007045_-
chr4:76443270-76443320:mpeak_150332|chr4_76439653_76452169_THAP6_NM_+|	49.8657	5.12516	1.82909	2.80202	0.00507837	0.267856	0	0	11.5954	0	0	0	63.8754	60.2825	122.138	95.1038	84.4754	160.918	14.1237	#DIV/0!	Inf	-0.467251	Inf	THAP6	chr4:76443323:+	chr4_75518110_+
chr4:52741558-52741608:mpeak_149378|chr4_52709165_52779694_DCUN1D4_NM_+|	53.8714	4.98089	1.91753	2.59755	0.0093891	0.277708	0	0	12.3684	0	0	0	52.7667	59.225	177.796	121.383	68.6363	154.282	12.8043	#DIV/0!	Inf	-0.248676	Inf	DCUN1D4	chr4:52741628:+	chr4_51875461_+
chr4:2901293-2901348:mpeak_146693|chr4_2845583_2929897_ADD1_NM_+|	95.9193	5.5568	1.97067	2.81975	0.00480608	0.267856	0	0	16.2335	0	0	0	94.4246	126.911	257.417	121.383	129.881	404.783	10.1724	#DIV/0!	Inf	-0.454519	Inf	ADD1	chr4:2901349:+	chr4_2899621_+
chr4:143048532-143048584:mpeak_154552|chr4_142950067_143767604_INPP4B_NM_-|	68.398	2.71228	1.02573	2.64423	0.00818768	0.273277	5.55439	4.23035	11.5954	5.00546	3.16783	0	95.8132	90.9526	74.2103	208.978	152.056	169.213	8.19236	2.31212	1.38728	-1.02275	2.41002	INPP4B	chr4:143048535:-	chr4_142127384_-
chr4:141451516-141451752:mpeak_154409|chr4_141445311_141471383_ELMOD2_NM_+|	36.4474	2.02215	0.867851	2.33007	0.0198024	0.319308	20.8289	10.5759	10.0493	5.00546	9.50349	3.31789	33.3263	43.3611	61.8419	92.6011	61.2447	85.7122	29.9244	7.44156	1.21747	-0.790183	2.00765	ELMOD2	chr4:141451718:+	-
chr4:123156103-123156202:mpeak_153675|chr4_123091757_123283185_KIAA1109_NM_+|	90.6718	3.27004	1.20665	2.71003	0.00672774	0.269946	5.55439	9.5183	25.5098	0	5.27971	0	106.922	208.345	180.888	182.699	151	212.345	8.1794	2.90071	2.94233	-0.138229	3.08055	KIAA1109	chr4:123156207:+	chr4_122235047_+
chr3:65958400-65958461:mpeak_136815|chr3_65342807_66024509_MAGI1_NM_-|	48.4888	2.20343	1.12113	1.96537	0.0493715	0.453736	5.55439	13.7486	6.95722	2.50273	2.11189	0	97.2018	97.2981	139.917	48.8033	65.4685	102.302	7.85254	3.19611	2.5086	0.626793	1.8818	MAGI1	chr3:65958409:-	chr3_65972728_-
chr3:61611620-61611675:mpeak_136178|chr3_61547242_62278835_PTPRG_NM_+|	11.1758	4.91787	1.99112	2.4699	0.0135152	0.293236	2.77719	2.11518	21.6447	0	0	0	11.1088	17.979	40.1973	16.2678	2.11189	19.9074	38.3013	#DIV/0!	Inf	0.855689	Inf	PTPRG	chr3:61611672:+	chr3_61625996_+
chr3:37286250-37286517:mpeak_134105|chr3_37284681_37407570_GOLGA4_NM_+|	44.9432	1.78014	0.896783	1.98503	0.0471415	0.444656	2.77719	8.46071	11.5954	3.7541	3.16783	2.21193	70.8184	92.0102	62.6149	90.0984	106.65	85.1593	10.1281	3.24001	1.32184	-0.322457	1.6443	GOLGA4	chr3:37286317:+	-
chr3:191089784-191089834:mpeak_145391|chr3_191046873_191109529_CCDC50_NM_+|	60.8166	5.12334	1.77276	2.89003	0.00385204	0.267856	0	0	12.3684	0	0	0	123.585	113.162	76.5294	141.404	138.329	124.421	11.8442	#DIV/0!	Inf	-0.367468	Inf	CCDC50	chr3:191089835:+	-
chr3:10068560-10068610:mpeak_132083|chr3_10068112_10142871_FANCD2_NM_+|	150.409	4.90086	1.72883	2.83478	0.0045857	0.267856	0	0	12.3684	0	1.05594	0	156.911	149.12	258.963	370.404	278.769	577.313	6.56735	0.258285	3.55005	-1.11822	4.66828	FANCD2	chr3:10068568:+	-
chr22:19429614-19429687:mpeak_128485|chr22_19429217_19435755_C22orf39_NM_-|	48.7546	4.23741	1.49195	2.84017	0.00450889	0.267856	4.16579	4.23035	23.9637	1.25137	1.05594	0	59.7096	62.3977	147.648	80.0874	62.3006	138.246	11.996	1.23327	3.80992	-0.0570384	3.86696	C22orf39	chr22:19429613:-	chr22_19442090_-
chr21:42750553-42750617:mpeak_127491|chr21_42733949_42779917_MX2_NM_+|	3.62398	4.95094	2.01164	2.46114	0.0138496	0.293236	2.77719	7.40312	6.95722	7.5082	3.16783	2.76491	0	0	0	2.50273	2.11189	8.29473	#DIV/0!	104.118	0.350525	-Inf	Inf	MX2	chr21:42750608:+	chr21_41378689_+
chr20:40095885-40095945:mpeak_123073|chr20_40034129_40247133_CHD6_NM_-|	61.0887	4.31753	1.64394	2.62632	0.00863133	0.274522	4.16579	1.05759	17.0065	0	1.05594	0	76.3728	116.335	192.483	98.8579	55.965	169.766	5.77115	0.975952	4.3959	0.246961	4.14894	CHD6	chr20:40095881:-	chr20_41467245_-
chr20:36700310-36700360:mpeak_122822|chr20_36661947_36718127_RPRD1B_NM_+|	15.8924	3.911	1.91278	2.04467	0.0408872	0.41932	0	0	12.3684	1.25137	0	0	27.7719	17.979	37.8782	23.776	34.8461	34.8379	44.3687	4.0168	3.30508	-0.160343	3.46542	RPRD1B	chr20:36700351:+	chr20_38071948_+
chr20:35408813-35408876:mpeak_122697|chr20_35406234_35492087_SOGA1_NM_-|	27.2373	2.80964	1.19917	2.34298	0.0191304	0.315197	8.33158	6.34553	6.95722	1.25137	3.16783	0	43.0465	25.3821	67.2531	43.7978	42.2377	79.0765	15.9449	4.01472	2.29147	-0.283219	2.57469	SOGA1	chr20:35408821:-	chr20_36780416_-;chr20_36780455_-
chr20:10019327-10019377:mpeak_121089|chr20_10015646_10036149_ANKEF1_NM_+|	19.1271	4.87704	2.03586	2.39557	0.0165947	0.306117	0	0	11.5954	0	0	0	22.2175	21.1518	56.4308	26.2787	22.1748	69.6758	34.8558	#DIV/0!	Inf	-0.243254	Inf	ANKEF1	chr20:10019379:+	-
chr2:99949157-99949362:mpeak_110181|chr2_99936262_99952860_TXNDC9_NM_-|	28.6683	4.18761	1.5002	2.79137	0.0052486	0.267856	6.94298	2.11518	7.73024	1.25137	0	0	48.6009	38.0732	72.6643	50.0546	36.958	79.6294	10.5363	2.25279	3.74589	-0.0646595	3.81055	TXNDC9	chr2:99949253:-	chr2_99332791_-
chr2:71580913-71580964:mpeak_108323|chr2_71558884_71661871_ZNF638_NM_+|	61.9279	3.97281	1.59604	2.48917	0.0128042	0.291257	4.16579	0	13.1414	1.25137	0	0	97.2018	115.277	180.115	122.634	86.5873	122.762	6.61264	1.13081	3.7898	0.241926	3.54787	ZNF638	chr2:71580963:+	chr2_71353808_+;chr2_71353832_+
chr2:58394556-58394709:mpeak_107108|chr2_58386935_58468515_FANCL_NM_-|	61.0395	3.6691	1.84139	1.99257	0.0463088	0.441041	0	0	13.1414	0	1.05594	0	74.9842	79.3191	226.496	85.0929	100.315	152.07	10.353	0.938678	3.63752	0.174239	3.46328	FANCL	chr2:58394654:-	chr2_58167431_-;chr2_58167523_-
chr2:32902178-32902229:mpeak_105223|chr2_32853086_33045882_TTC27_NM_+|	20.4264	4.69029	1.99722	2.34841	0.0188536	0.315087	0	1.05759	21.6447	0	1.05594	0	24.9947	21.1518	60.2959	25.0273	16.8951	72.9937	31.9923	2.75665	4.42623	-0.110508	4.53674	TTC27	chr2:32902230:+	chr2_32677162_+
chr2:32422838-32422908:mpeak_105094|chr2_32390909_32445281_SLC30A6_NM_+|	50.6656	4.66419	1.78776	2.60896	0.00908174	0.277333	6.94298	0	44.8354	1.25137	1.05594	0	68.0412	59.225	159.243	83.8415	47.5174	136.034	27.1082	1.29434	4.48807	0.0996217	4.38845	SLC30A6	chr2:32422891:+	chr2_32197819_+
chr2:25797484-25797581:mpeak_104298|chr2_25600422_25896516_DTNB_NM_-|	21.9707	4.11892	1.96131	2.10008	0.0357219	0.395202	0	0	15.4605	0	0	0	48.6009	57.1098	56.4308	40.0437	21.1189	24.8842	28.6056	#DIV/0!	Inf	0.91406	Inf	DTNB	chr2:25797523:-	-
chr2:233783645-233783695:mpeak_119497|chr2_233744389_233877951_NGEF_NM_-|	5.70768	5.21651	2.29137	2.27659	0.0228106	0.337305	0	0	13.1414	0	0	0	9.72018	8.46071	5.41117	15.0164	8.44754	8.29473	167.108	#DIV/0!	Inf	-0.42885	Inf	NGEF	chr2:233783640:-	-
chr2:231236862-231236926:mpeak_119204|chr2_231191893_231267512_SP140L_NM_+|	11.02	5.28281	2.02464	2.60926	0.00907389	0.277333	8.33158	0	15.4605	0	0	0	6.94298	13.7486	39.4242	7.5082	13.7273	27.0961	59.3655	#DIV/0!	Inf	0.314779	Inf	SP140L	chr2:231236923:+	-
chr2:231050627-231050850:mpeak_119191|chr2_231033953_231090444_SP110_NM_-|	21.4036	4.67364	1.66243	2.81133	0.00493373	0.267856	62.4868	45.4763	12.3684	61.3169	43.2937	17.1424	0	0	0	5.00546	4.22377	5.52982	#DIV/0!	824.938	-0.0169431	-Inf	Inf	SP110	chr2:231050710:-	chr2_230185994_-
chr2:112186882-112186964:mpeak_110903|chr2_112125152_112252692_MIR4435-2HG_NR_-|	382.464	2.83472	1.11082	2.55192	0.0107131	0.28499	556.827	290.837	357.137	1517.91	904.943	870.947	5.55439	0	0	23.776	17.951	43.6856	7230.33	3856.34	-1.45096	-3.94275	2.49179	MIR4435-2HG	chr2:112186891:-	chr2_111429300_-
chr19:8055424-8055483:mpeak_96651|chr19_8028691_8070529_ELAVL1_NM_-|	198.317	6.60597	1.6098	4.1036	4.06774e-05	0.257152	6.94298	3.17277	6.18419	1.25137	1.05594	0	20.8289	21.1518	149.967	460.503	349.517	1359.23	8.49188	0.159547	2.82058	-3.49841	6.319	ELAVL1	chr19:8055409:-	-
chr19:59070728-59070803:mpeak_102709|chr19_59070552_59084283_MZF1-AS1_NR_+|	35.5883	3.22912	1.44345	2.23708	0.0252812	0.349352	11.1088	9.5183	0.773024	3.7541	0	0	69.4298	69.8008	32.467	93.8524	86.5873	49.7684	12.4638	4.89222	2.51108	-0.423069	2.93415	MZF1-AS1	chr19:59070794:+	chr19_58559395_+;chr19_58559446_+
chr19:54681933-54682124:mpeak_102073|chr19_54678125_54693733_MBOAT7_NM_-|	165.935	1.76012	0.891187	1.97503	0.0482645	0.449961	24.9947	28.5549	37.1052	36.2896	11.6154	4.42386	233.284	190.366	219.539	390.426	313.615	501.002	14.0946	4.34249	0.792777	-0.90577	1.69855	MBOAT7	chr19:54681977:-;chr19:54682042:-	chr19_54178261_-;chr19_54178326_-
chr19:54622136-54622207:mpeak_102047|chr19_54618789_54634737_PRPF31_NM_+|	101.195	4.2105	1.33212	3.16075	0.00157364	0.267856	2.77719	5.28794	36.3321	0	2.11189	1.65895	118.031	137.486	186.299	195.213	141.496	387.641	10.0488	0.780872	3.55752	-0.713241	4.27076	PRPF31	chr19:54622189:+	chr19_54118813_+
chr19:53122042-53122146:mpeak_101732|chr19_53118050_53193834_ZNF83_NM_-|	34.6362	2.56103	0.951929	2.69036	0.00713747	0.269946	8.33158	9.5183	25.5098	1.25137	5.27971	2.76491	44.4351	53.937	63.388	66.3224	82.3635	52.5333	26.8049	4.61983	2.22167	-0.314913	2.53659	ZNF83	chr19:53122047:-	-
chr19:46288498-46288571:mpeak_100677|chr19_46287548_46296060_DMWD_NM_-|	49.2175	1.99425	0.914837	2.1799	0.0292652	0.367285	11.1088	10.5759	3.86512	2.50273	1.05594	2.76491	98.5903	92.0102	79.6215	107.617	91.867	89.0301	9.45511	2.19177	2.0145	-0.0944993	2.109	DMWD	chr19:46288495:-	chr19_45785256_-
chr19:37356894-37356955:mpeak_99449|chr19_37341787_37383719_ZNF345_NR_+mpeak_99449|chr19_37341259_37367686_ZNF345_NM_+||	3.3565	7.39383	2.85499	2.58979	0.00960332	0.279067	1.3886	1.05759	18.5526	0	0	0	0	3.17277	0.773024	0	3.16783	12.1656	354.788	#DIV/0!	Inf	-1.9583	Inf	ZNF345	chr19:37356950:+	chr19_36866042_+
chr19:24111028-24111078:mpeak_98663|chr19_24097683_24115144_ZNF726_NM_+|	5.93707	3.84773	1.83035	2.10218	0.0355373	0.394484	1.3886	3.17277	22.4177	1.25137	1.05594	0	4.16579	10.5759	6.18419	7.5082	6.33566	7.18877	128.927	16.4552	3.54756	-0.00734142	3.5549	ZNF726	chr19:24111079:+	chr19_23928276_+
chr19:17531597-17531742:mpeak_97896|chr19_17516494_17535739_MVB12A_NM_+|	35.0209	2.89018	1.44287	2.00308	0.0451692	0.436189	13.886	10.5759	0	2.50273	2.11189	0	63.8754	58.1674	52.5656	50.0546	57.0209	109.49	21.0143	3.19622	2.40625	-0.310684	2.71693	MVB12A	chr19:17531655:+;chr19:17531684:+;chr19:17531739:+	chr19_17420845_+;chr19_17420874_+;chr19_17420926_+
chr18:8611260-8611484:mpeak_92483|chr18_8609442_8638146_RAB12_NM_+|	529.538	1.97475	0.676634	2.91849	0.00351735	0.267856	34.7149	66.6281	34.0131	38.7923	46.4615	19.3544	529.055	590.134	411.249	1791.96	1468.82	1323.29	8.84427	2.282	0.371763	-1.58268	1.95444	RAB12	chr18:8611315:+	chr18_8611312_+;chr18_8611480_+
chr18:32824007-32824140:mpeak_94076|chr18_32820993_32837891_ZNF397_NM_+|	12.2901	2.69052	1.30131	2.06755	0.0386824	0.410492	22.2175	28.5549	27.0558	26.2787	10.5594	12.7186	1.3886	2.11518	0.773024	3.7541	2.11189	9.95368	1819.78	313.26	0.651214	-1.88712	2.53833	ZNF397	chr18:32824064:+;chr18:32824141:+	chr18_35244055_+;chr18_35244098_+;chr18_35244175_+
chr17:79223855-79224044:mpeak_91825|chr17_79220473_79269139_SLC38A10_NM_-|	80.8007	1.64228	0.716379	2.29247	0.0218786	0.33206	31.9377	23.2669	48.7005	13.765	16.8951	8.29473	144.414	124.795	119.046	127.639	115.098	195.756	26.7621	8.8838	1.41539	-0.175548	1.59094	SLC38A10	chr17:79223863:-;chr17:79223939:-;chr17:79223990:-	chr17_81250060_-;chr17_81250139_-;chr17_81250192_-
chr17:687105-687163:mpeak_81914|chr17_685512_694773_RNMTL1_NM_+|	55.1885	4.23876	1.77652	2.386	0.0170328	0.308036	0	0	12.3684	1.25137	0	0	115.254	93.0678	64.161	183.951	98.2027	94.007	13.6175	0.998004	3.30508	-0.465186	3.77027	RNMTL1	chr17:687166:+	chr17_783923_+
chr17:59806267-59806326:mpeak_89413|chr17_59761501_59940920_BRIP1_NM_-|	209.083	1.52989	0.659443	2.31997	0.0203427	0.322403	27.7719	32.7852	41.7433	18.7705	15.8391	29.861	223.564	215.748	384.193	481.776	441.384	595.562	12.4226	4.24506	0.666098	-0.883008	1.54911	BRIP1	chr17:59806269:-	chr17_61728910_-
chr17:54907215-54907265:mpeak_87728|chr17_54869713_54911256_C17orf67_NM_-|	15.9218	4.76525	1.89118	2.51972	0.0117448	0.288705	0	1.05759	13.9144	0	0	0	19.4404	45.4763	30.1479	16.2678	33.7902	30.967	23.624	#DIV/0!	Inf	0.230542	Inf	C17orf67	chr17:54907213:-	chr17_56829852_-
chr17:5291925-5292057:mpeak_82691|chr17_5289589_5323059_NUP88_NM_-|	48.2277	2.31839	1.11026	2.08815	0.036784	0.400597	9.72018	7.40312	10.0493	6.25683	2.11189	0	62.4868	53.937	119.819	121.383	63.3566	122.209	11.502	4.08964	1.69907	-0.377726	2.0768	NUP88	chr17:5291996:-	-
chr17:3977289-3977341:mpeak_82385|chr17_3910264_4046253_ZZEF1_NM_-|	45.7044	4.61816	1.62122	2.84858	0.00439149	0.267856	1.3886	2.11518	17.7796	0	1.05594	0	55.5439	93.0678	105.904	88.847	64.4125	118.338	8.36228	1.16637	4.33312	-0.0937153	4.42684	ZZEF1	chr17:3977289:-	chr17_4073991_-
chr16:84522785-84522840:mpeak_81020|chr16_84513632_84538288_TLDC1_NM_-|	78.61	2.46857	1.05495	2.33999	0.0192842	0.316393	9.72018	6.34553	7.73024	1.25137	1.05594	2.21193	81.9272	116.335	228.042	120.131	134.105	234.464	5.58192	0.924746	2.39656	-0.197068	2.59363	TLDC1	chr16:84522786:-	chr16_84489182_-
chr16:67987646-67987799:mpeak_79051|chr16_67978834_68002597_SLC12A4_NM_-|	14.8158	4.04486	1.53865	2.62884	0.00856757	0.273381	0	11.6335	13.9144	1.25137	1.05594	0	22.2175	20.0942	27.0558	28.7814	27.4545	24.3312	55.2446	4.29575	3.46892	-0.215931	3.68485	SLC12A4	chr16:67987645:-;chr16:67987686:-;chr16:67987746:-	chr16_67953845_-
chr16:14744392-14744569:mpeak_75745|chr16_14726667_14761491_BFAR_NM_+|	169.102	1.5048	0.669847	2.24649	0.0246725	0.346402	23.6061	21.1518	49.4735	17.5191	26.3986	14.3775	248.559	216.806	227.269	442.984	360.077	381.005	13.6048	4.92331	0.692831	-0.773584	1.46641	BFAR	chr16:14744446:+;chr16:14744570:+	chr16_14650587_+
chr15:70985160-70985210:mpeak_70992|chr15_70949466_71055850_UACA_NM_-|	13.7087	4.91669	1.68938	2.91035	0.0036102	0.267856	1.3886	2.11518	10.0493	0	0	0	19.4404	30.6701	23.9637	21.2732	16.8951	38.7088	18.2966	#DIV/0!	Inf	-0.0535829	Inf	UACA	chr15:70985155:-	chr15_70692821_-
chr15:67892794-67892846:mpeak_70783|chr15_67835020_68098983_MAP2K5_NM_+|	20.912	5.60355	1.73678	3.2264	0.00125358	0.267856	2.77719	0	13.1414	0	0	0	29.1605	27.4973	39.4242	38.7923	45.4055	54.7452	24.8516	#DIV/0!	Inf	-0.532156	Inf	MAP2K5	chr15:67892846:+	chr15_67600508_+
chr15:34437129-34437220:mpeak_67221|chr15_34434572_34502297_KATNBL1_NM_-|	34.8058	4.8479	1.74051	2.78533	0.00534738	0.267856	0	3.17277	14.6875	0	0	0	51.3781	59.225	116.727	60.0656	31.6783	80.7354	11.7848	#DIV/0!	Inf	0.398363	Inf	KATNBL1	chr15:34437170:-	chr15_34144970_-
chr15:100243687-100243742:mpeak_73866|chr15_100106132_100252594_MEF2A_NM_+|	46.0948	3.97082	1.54264	2.57405	0.0100516	0.28147	1.3886	6.34553	12.3684	0	1.05594	0	73.5956	71.916	163.108	71.3279	47.5174	104.514	6.51368	1.41827	4.25077	0.466466	3.78431	MEF2A	chr15:100243738:+	chr15_99703532_+
chr14:93753861-93754096:mpeak_65424|chr14_93709434_93799438_BTBD7_NM_-|	447.482	1.27998	0.634536	2.0172	0.0436749	0.432011	36.1035	37.0156	37.8782	33.7869	21.1189	11.6126	658.195	660.993	837.185	1076.17	853.202	1106.52	5.14741	2.19106	0.7387	-0.493515	1.23221	BTBD7	chr14:93753974:-	chr14_93287488_-;chr14_93287630_-
chr14:80993028-80993082:mpeak_64637|chr14_80963925_81405884_CEP128_NM_-|	3.94081	6.49089	2.47311	2.62458	0.00867556	0.274753	1.3886	1.05759	14.6875	2.50273	2.11189	0	0	1.05759	0	11.2623	1.05594	12.1656	540.022	28.2714	1.89255	-4.53298	6.42553	CEP128	chr14:80993002:-;chr14:80993031:-;chr14:80993061:-	chr14_80526685_-
chr14:37673832-37673882:mpeak_60170|chr14_37667117_38016109_MIPOL1_NM_+|	4.45485	6.0474	2.21168	2.7343	0.00625125	0.268895	4.16579	3.17277	11.5954	1.25137	1.05594	1.65895	0	2.11518	0	2.50273	1.05594	24.8842	298.382	13.9446	2.25512	-3.74922	6.00434	MIPOL1	chr14:37673885:+	chr14_37204678_+
chr14:35330434-35330578:mpeak_59959|chr14_35222910_35344853_BAZ1A_NM_-|	14.9206	4.50842	1.85768	2.42691	0.015228	0.299	4.16579	0	13.1414	0	1.05594	0	8.33158	21.1518	41.7433	18.7705	25.3426	45.3445	36.4482	3.54115	4.03477	-0.328788	4.36356	BAZ1A	chr14:35330432:-	chr14_34861209_-;chr14_34861292_-
chr14:21559837-21559976:mpeak_58961|chr14_21559299_21572863_ZNF219_NM_-|	166.804	1.60987	0.643239	2.50276	0.0123229	0.29001	77.7614	84.6071	63.388	31.2841	9.50349	25.4372	344.372	314.104	242.73	271.546	280.881	256.031	25.0505	8.1915	1.76932	0.156683	1.61264	ZNF219	chr14:21559834:-;chr14:21559914:-	chr14_21091665_-;chr14_21091756_-
chr13:113151825-113151875:mpeak_58572|chr13_113140465_113242499_TUBGCP3_NM_-|	86.5851	5.29504	1.83107	2.89178	0.00383064	0.267856	0	0	11.5954	0	0	0	83.3158	106.816	211.809	178.945	134.105	312.435	8.65453	#DIV/0!	Inf	-0.637992	Inf	TUBGCP3	chr13:113151824:-	chr13_112497511_-
chr12:7016672-7016865:mpeak_41439|chr12_7013896_7023054_LRRC23_NM_+|	19.5759	2.55294	1.1097	2.30057	0.0214157	0.329293	13.886	7.40312	27.8289	5.00546	4.22377	3.87088	33.3263	27.4973	7.73024	42.5464	42.2377	19.3544	71.6487	12.5795	1.90667	-0.603194	2.50987	LRRC23	chr12:7016733:+;chr12:7016829:+;chr12:7016868:+;chr12:7016897:+	chr12_6907549_+;chr12_6907568_+;chr12_6907664_+;chr12_6907729_+
chr12:46354183-46354347:mpeak_44256|chr12_46315977_46384401_SCAF11_NM_-|	338.853	1.82224	0.729007	2.49961	0.0124329	0.290215	51.3781	53.937	118.273	45.0492	19.007	24.8842	599.874	581.674	392.696	820.896	819.412	539.158	14.2029	4.08083	1.32993	-0.469316	1.79925	SCAF11	chr12:46354238:-	chr12_45960457_-
chr12:42745916-42745977:mpeak_43917|chr12_42719946_42840393_PPHLN1_NM_+|	25.1203	5.01565	1.74651	2.87181	0.00408124	0.267856	0	1.05759	11.5954	0	0	0	40.2693	39.1308	53.3387	57.5628	33.7902	64.6989	14.2983	#DIV/0!	Inf	-0.233437	Inf	PPHLN1	chr12:42745965:+	chr12_42352162_+
chr12:32973086-32973136:mpeak_43546|chr12_32945426_33049780_PKP2_NM_-|	33.7669	4.88063	2.07305	2.35433	0.0185562	0.3139	0	0	15.4605	0	0	0	37.4921	23.2669	143.782	60.0656	43.2937	81.8414	22.6758	#DIV/0!	Inf	0.143305	Inf	PKP2	chr12:32973082:-	chr12_32820146_-
chr12:19420844-19421025:mpeak_42527|chr12_19282625_19528464_PLEKHA5_NM_+|	105.757	2.027	0.946176	2.14231	0.0321684	0.380814	18.0518	21.1518	6.18419	5.00546	7.3916	0.552982	191.626	189.308	203.305	226.497	205.909	194.097	7.76868	2.06704	1.80934	-0.10076	1.9101	PLEKHA5	chr12:19420906:+	-
chr12:13139866-13139916:mpeak_42170|chr12_13128413_13153243_HEBP1_NM_-|	94.2756	4.70994	1.82367	2.58267	0.00980386	0.280233	0	0	11.5954	0	0	0	140.248	132.199	277.516	173.94	107.706	288.104	6.32517	#DIV/0!	Inf	-0.0509955	Inf	HEBP1	chr12:13139868:-	chr12_12986937_-
chr12:124222151-124222234:mpeak_52665|chr12_124196864_124242473_ATP6V0A2_NM_+|	62.1202	2.51714	0.957368	2.62923	0.00855782	0.273381	9.72018	6.34553	12.3684	2.50273	5.27971	1.10596	80.5386	69.8008	118.273	158.923	88.6992	191.885	10.5856	2.02236	1.67762	-0.710364	2.38799	ATP6V0A2	chr12:124222233:+	chr12_123737687_+
chr12:124003935-124003985:mpeak_52593|chr12_123957229_124018265_RILPL1_NM_-|	32.7226	3.71759	1.82082	2.04171	0.0411807	0.420242	0	0	13.9144	0	1.05594	0	45.8237	64.5129	91.9899	55.0601	63.3566	56.9572	20.6317	1.80633	3.71998	0.206251	3.51373	RILPL1	chr12:124003937:-	chr12_123519390_-
chr11:94205134-94205184:mpeak_38637|chr11_94153347_94227040_MRE11A_NM_-|	73.7724	5.73093	1.8518	3.09478	0.00196956	0.267856	0	0	15.4605	0	0	0	129.139	140.659	64.161	182.699	191.126	162.024	13.8883	#DIV/0!	Inf	-0.682152	Inf	MRE11A	chr11:94205148:-	chr11_94471980_-
chr11:73064834-73064884:mpeak_36899|chr11_73019662_73078628_ARHGEF17_NM_+|	56.345	4.81143	1.63342	2.94562	0.00322306	0.267856	0	1.05759	10.8223	0	0	0	102.756	129.026	89.6708	97.6065	123.545	121.656	5.54355	#DIV/0!	Inf	-0.0927941	Inf	ARHGEF17	chr11:73064885:+	chr11_73353839_+
chr11:674185-674356:mpeak_31351|chr11_644654_695754_DEAF1_NM_-|	42.975	2.03705	1.01934	1.9984	0.0456735	0.43855	6.94298	9.5183	10.8223	2.50273	5.27971	0	70.8184	74.0312	95.855	76.3333	60.1887	103.408	11.3349	4.86545	1.80974	0.0046516	1.80509	DEAF1	chr11:674184:-;chr11:674245:-;chr11:674301:-	chr11_674185_-;chr11_674225_-;chr11_674242_-;chr11_674266_-;chr11_674346_-
chr11:64896738-64896789:mpeak_35490|chr11_64895960_64902003_SYVN1_NM_-|	79.1529	5.2671	1.94265	2.7113	0.00670196	0.269946	1.3886	1.05759	25.5098	1.25137	0	0	51.3781	61.3401	284.473	105.115	64.4125	353.909	7.03842	0.717203	4.48158	-0.39818	4.87976	SYVN1	chr11:64896738:-	chr11_65129265_-
chr11:62575146-62575271:mpeak_35197|chr11_62575138_62599563_STX5_NM_-|	52.8706	3.24672	1.30734	2.48346	0.0130112	0.29152	5.55439	3.17277	21.6447	0	4.22377	0	94.4246	105.759	79.6215	138.902	74.9719	106.173	10.8546	3.95921	2.84613	-0.193859	3.03999	STX5	chr11:62575154:-	chr11_62807683_-
chr11:118244478-118244528:mpeak_39769|chr11_118230295_118267028_UBE4A_NM_+|	132.565	5.17136	1.87505	2.75798	0.00581598	0.267856	0	0	13.9144	0	0	0	134.694	160.753	418.979	246.519	212.245	403.677	5.84291	#DIV/0!	Inf	-0.27164	Inf	UBE4A	chr11:118244553:+	chr11_118373837_+
chr10:38264969-38265057:mpeak_24118|chr10_38242123_38265453_ZNF25_NM_-|	7.77017	3.71783	1.57589	2.3592	0.0183146	0.313389	8.33158	17.979	3.0921	6.25683	8.44754	10.5067	0	3.17277	0	8.75956	8.44754	18.2484	308.907	71.1061	0.221892	-3.4822	3.70409	ZNF25	chr10:38264975:-	chr10_37976039_-
chr10:131943422-131943474:mpeak_31056|chr10_131934638_131978376_GLRX3_NM_+|	67.0039	4.86495	1.75688	2.76908	0.00562152	0.267856	0	1.05759	16.2335	0	0	0	141.637	103.644	194.802	131.393	78.1398	137.14	5.89359	#DIV/0!	Inf	0.3442	Inf	GLRX3	chr10:131943474:+	chr10_130145201_+
chr10:12061057-12061107:mpeak_21745|chr10_11963306_12085169_UPF2_NM_-|	42.9756	3.67856	1.57294	2.33865	0.0193533	0.316393	1.3886	2.11518	13.9144	1.25137	0	0	86.093	68.7432	142.236	76.3333	63.3566	60.2751	5.86328	1.87738	3.79902	0.571069	3.22795	UPF2	chr10:12061056:-	chr10_12019058_-
chr10:118657411-118657520:mpeak_30045|chr10_118646077_118886097_SHTN1_NM_-|	100.794	1.54256	0.770898	2.00099	0.0453932	0.437271	8.33158	15.8638	25.5098	2.50273	5.27971	6.0828	190.238	227.382	208.716	155.169	174.231	190.226	7.93587	2.66831	1.84192	0.269463	1.57246	SHTN1	chr10:118657401:-	-
chr1:67445371-67445422:mpeak_6223|chr1_67390577_67450254_MIER1_NM_+|	29.6398	5.4664	1.71803	3.18178	0.00146373	0.267856	1.3886	1.05759	17.0065	0	0	0	38.8807	52.8794	70.3452	65.071	44.3496	64.6989	12	#DIV/0!	Inf	-0.103147	Inf	MIER1	chr1:67445424:+	chr1_66979739_+
chr1:36888641-36888694:mpeak_3602|chr1_36883856_36916086_OSCP1_NM_-|	9.9105	4.78368	2.02655	2.3605	0.0182502	0.313389	0	1.05759	11.5954	0	0	0	6.94298	16.9214	28.6019	8.75956	17.951	27.0961	36.1745	#DIV/0!	Inf	-0.0363957	Inf	OSCP1	chr1:36888643:-	chr1_36423037_-
chr1:233231104-233231154:mpeak_19912|chr1_233120223_233431459_PCNXL2_NM_-|	11.9582	3.64326	1.73808	2.09614	0.0360699	0.396555	0	1.05759	12.3684	1.25137	1.05594	0	8.33158	20.0942	19.3256	28.7814	27.4545	23.7782	42.1746	4.32544	2.54074	-0.744714	3.28546	PCNXL2	chr1:233231108:-	chr1_233095401_-
chr1:227965211-227965315:mpeak_19528|chr1_227922696_227968227_SNAP47_NM_+|	28.6	3.17023	1.32075	2.40032	0.0163806	0.305179	9.72018	13.7486	39.4242	7.5082	6.33566	0	33.3263	16.9214	44.0624	42.5464	30.6223	98.9838	66.6875	12.0624	2.18366	-0.868204	3.05186	SNAP47	chr1:227965318:+;chr1:227965351:+	-
chr1:224445742-224445792:mpeak_19134|chr1_224415372_224517891_NVL_NM_-|	13.4288	4.73288	2.25592	2.09798	0.0359072	0.395721	0	0	15.4605	0	1.05594	0	4.16579	9.5183	40.9703	15.0164	16.8951	58.0631	84.8632	3.5208	3.87198	-0.719181	4.59116	NVL	chr1:224445760:-	chr1_224258060_-
chr1:220923894-220923944:mpeak_18933|chr1_220921675_220957260_MARC2_NM_+|	16.3072	4.18224	1.75849	2.37831	0.0173923	0.30944	0	2.11518	11.5954	0	0	0	34.7149	32.7852	44.8354	32.5355	22.1748	14.9305	18.3075	#DIV/0!	Inf	0.689809	Inf	MARC2	chr1:220923899:+;chr1:220923965:+	chr1_220750554_+
chr1:207941911-207941961:mpeak_18153|chr1_207925382_207966863_CD46_NM_+|	61.6389	5.1312	1.83037	2.80337	0.00505716	0.267856	0	2.11518	12.3684	0	0	0	49.9895	70.8584	218.766	76.3333	79.1957	230.041	6.39707	#DIV/0!	Inf	-0.183097	Inf	CD46	chr1:207941988:+	-
chr1:202883556-202883736:mpeak_17522|chr1_202861787_202897772_KLHL12_NM_-|	139.691	2.46969	1.2574	1.96413	0.0495146	0.454684	6.94298	4.23035	25.5098	1.25137	1.05594	5.52982	116.642	158.638	440.624	177.694	199.573	538.605	5.12403	0.855702	2.22672	-0.35538	2.5821	KLHL12	chr1:202883556:-;chr1:202883628:-;chr1:202883659:-	chr1_202914430_-;chr1_202914502_-
chr1:117913111-117913161:mpeak_10251|chr1_117910084_118065446_MAN1A2_NM_+|	71.2506	5.3395	1.81855	2.93614	0.00332324	0.267856	1.3886	0	14.6875	0	0	0	88.8702	68.7432	225.723	147.661	95.0349	212.898	6.29058	#DIV/0!	Inf	-0.249138	Inf	MAN1A2	chr1:117913171:+	chr1_117370539_+
chr1:111718338-111718390:mpeak_9137|chr1_111682248_111726812_CEPT1_NM_+|	30.2072	3.60208	1.78783	2.01478	0.0439282	0.43278	1.3886	2.11518	15.4605	2.50273	0	0	26.3833	20.0942	106.677	58.8142	19.007	110.043	12.3824	3.9966	2.92171	-0.294703	3.21641	CEPT1	chr1:111718391:+	chr1_111175768_+
[truncated: 1,276 more rows]
