# Supplementary material for: Compartment-specific and ELAVL1-coordinated regulation of intronic polyadenylation isoforms by doxorubicin
Source: HighWire-hosted journal article supplement (doi:10.1101/gr.276192.121), 2022-07-01
Supplement: Supplemental_Table_S16.xlsx.xlsx [file Supplemental_Table_S16.xlsx.xlsx]

## Sheet: Feuil1
Supplemental Table S16 : List of IPA isoforms that are down-regulated by doxorubicin in the nucleus and have down-regulated ELAVL1 binding in the IPA region in the nucleus.
chr_3seq	start_win	end_win	peak_3seq	gene_seq	strand_3seq	intron	chr_iCLIP	start_iCLIP	end_iCLIP	peak_iCLIP	gene_iCLIP	strand_iCLIP
chr12	112525976	112528529	chr12_112525976_112526031:mpeak_27	chr12:112464492_112546635_NAA25_NM_-	-	chr12:112525605_112528529:NM_024953_intron_20_0_chr12_112525606_r	chr12	112527000	112527200	mpeak:40320	chr12:112464492-112546635-NAA25	-
chr12	112525976	112528529	chr12_112525976_112526031:mpeak_27	chr12:112464492_112546635_NAA25_NM_-	-	chr12:112525605_112528529:NM_024953_intron_20_0_chr12_112525606_r	chr12	112527250	112527500	mpeak:40321	chr12:112464492-112546635-NAA25	-
chr12	112525976	112528529	chr12_112525976_112526031:mpeak_27	chr12:112464492_112546635_NAA25_NM_-	-	chr12:112525605_112528529:NM_024953_intron_20_0_chr12_112525606_r	chr12	112528000	112528300	mpeak:40322	chr12:112464492-112546635-NAA25	-
chr12	50412842	50413526	chr12_50412842_50412908:mpeak_22	chr12:50382944_50419307_RACGAP1_NM_-	-	chr12:50410502_50413526:NM_013277_intron_15_0_chr12_50410503_r	chr12	50413400	50413650	mpeak:35341	chr12:50382944-50419307-RACGAP1	-
chr12	50412842	50419180	chr12_50412842_50412908:mpeak_22	chr12:50382944_50419307_RACGAP1_NM_-	-	chr12:50400419_50419180:NM_001320005_intron_14_0_chr12_50400420_r	chr12	50413400	50413650	mpeak:35341	chr12:50382944-50419307-RACGAP1	-
chr12	50412842	50419110	chr12_50412842_50412908:mpeak_22	chr12:50382944_50419307_RACGAP1_NM_-	-	chr12:50410498_50419110:NM_001320001_intron_15_0_chr12_50410499_r	chr12	50413400	50413650	mpeak:35341	chr12:50382944-50419307-RACGAP1	-
chr12	50412842	50419233	chr12_50412842_50412908:mpeak_22	chr12:50382944_50419307_RACGAP1_NM_-	-	chr12:50410502_50419233:NM_001320004_intron_15_0_chr12_50410503_r	chr12	50413400	50413650	mpeak:35341	chr12:50382944-50419307-RACGAP1	-
chr12	50412842	50419180	chr12_50412842_50412908:mpeak_22	chr12:50382944_50419307_RACGAP1_NM_-	-	chr12:50410498_50419180:NM_001320003_intron_15_0_chr12_50410499_r	chr12	50413400	50413650	mpeak:35341	chr12:50382944-50419307-RACGAP1	-
chr12	50412842	50419180	chr12_50412842_50412908:mpeak_22	chr12:50382944_50419307_RACGAP1_NM_-	-	chr12:50412372_50419180:NM_001320000_intron_16_0_chr12_50412373_r	chr12	50413400	50413650	mpeak:35341	chr12:50382944-50419307-RACGAP1	-
chr12	50412842	50419180	chr12_50412842_50412908:mpeak_22	chr12:50382944_50419307_RACGAP1_NM_-	-	chr12:50410502_50419180:NM_001320007_intron_14_0_chr12_50410503_r	chr12	50413400	50413650	mpeak:35341	chr12:50382944-50419307-RACGAP1	-
chr12	50412842	50419155	chr12_50412842_50412908:mpeak_22	chr12:50382944_50419307_RACGAP1_NM_-	-	chr12:50410502_50419155:NM_001320002_intron_15_0_chr12_50410503_r	chr12	50413400	50413650	mpeak:35341	chr12:50382944-50419307-RACGAP1	-
chr12	50412842	50414844	chr12_50412842_50412908:mpeak_22	chr12:50382944_50419307_RACGAP1_NM_-	-	chr12:50412372_50414844:NM_001126103_intron_16_0_chr12_50412373_r	chr12	50413400	50413650	mpeak:35341	chr12:50382944-50419307-RACGAP1	-
chr12	50412842	50419180	chr12_50412842_50412908:mpeak_22	chr12:50382944_50419307_RACGAP1_NM_-	-	chr12:50412372_50419180:NM_001320006_intron_16_0_chr12_50412373_r	chr12	50413400	50413650	mpeak:35341	chr12:50382944-50419307-RACGAP1	-
chr12	50412842	50419180	chr12_50412842_50412908:mpeak_22	chr12:50382944_50419307_RACGAP1_NM_-	-	chr12:50410502_50419180:NM_001319999_intron_15_0_chr12_50410503_r	chr12	50413400	50413650	mpeak:35341	chr12:50382944-50419307-RACGAP1	-
chr12	50412842	50419110	chr12_50412842_50412908:mpeak_22	chr12:50382944_50419307_RACGAP1_NM_-	-	chr12:50410502_50419110:NM_001126104_intron_15_0_chr12_50410503_r	chr12	50413400	50413650	mpeak:35341	chr12:50382944-50419307-RACGAP1	-
chr1	41629726	41651792	chr1_41629726_41629877:mpeak_3	chr1:41492870_41707815_SCMH1_NM_-	-	chr1:41627104_41651792:NM_001172218_intron_13_0_chr1_41627105_r	chr1	41637150	41637250	mpeak:2389	chr1:41492870-41707815-SCMH1	-
chr1	41629726	41651792	chr1_41629726_41629877:mpeak_3	chr1:41492870_41707815_SCMH1_NM_-	-	chr1:41627104_41651792:NM_001172218_intron_13_0_chr1_41627105_r	chr1	41637900	41638100	mpeak:2390	chr1:41492870-41707815-SCMH1	-
chr1	41629726	41651792	chr1_41629726_41629877:mpeak_3	chr1:41492870_41707815_SCMH1_NM_-	-	chr1:41627104_41651792:NM_001172218_intron_13_0_chr1_41627105_r	chr1	41638800	41639000	mpeak:2392	chr1:41492870-41707815-SCMH1	-
chr1	41629726	41651792	chr1_41629726_41629877:mpeak_3	chr1:41492870_41707815_SCMH1_NM_-	-	chr1:41627104_41651792:NM_001172218_intron_13_0_chr1_41627105_r	chr1	41639050	41639150	mpeak:2393	chr1:41492870-41707815-SCMH1	-
chr1	41629726	41651792	chr1_41629726_41629877:mpeak_3	chr1:41492870_41707815_SCMH1_NM_-	-	chr1:41627104_41651792:NM_001172218_intron_13_0_chr1_41627105_r	chr1	41639600	41639650	mpeak:2395	chr1:41492870-41707815-SCMH1	-
chr1	41629726	41651792	chr1_41629726_41629877:mpeak_3	chr1:41492870_41707815_SCMH1_NM_-	-	chr1:41627104_41651792:NM_001172218_intron_13_0_chr1_41627105_r	chr1	41649200	41649350	mpeak:2399	chr1:41492870-41707815-SCMH1	-
chr1	41629726	41651792	chr1_41629726_41629877:mpeak_3	chr1:41492870_41707815_SCMH1_NM_-	-	chr1:41627104_41651792:NM_001172220_intron_11_0_chr1_41627105_r	chr1	41637150	41637250	mpeak:2389	chr1:41492870-41707815-SCMH1	-
chr1	41629726	41651792	chr1_41629726_41629877:mpeak_3	chr1:41492870_41707815_SCMH1_NM_-	-	chr1:41627104_41651792:NM_001172220_intron_11_0_chr1_41627105_r	chr1	41637900	41638100	mpeak:2390	chr1:41492870-41707815-SCMH1	-
chr1	41629726	41651792	chr1_41629726_41629877:mpeak_3	chr1:41492870_41707815_SCMH1_NM_-	-	chr1:41627104_41651792:NM_001172220_intron_11_0_chr1_41627105_r	chr1	41638800	41639000	mpeak:2392	chr1:41492870-41707815-SCMH1	-
chr1	41629726	41651792	chr1_41629726_41629877:mpeak_3	chr1:41492870_41707815_SCMH1_NM_-	-	chr1:41627104_41651792:NM_001172220_intron_11_0_chr1_41627105_r	chr1	41639050	41639150	mpeak:2393	chr1:41492870-41707815-SCMH1	-
chr1	41629726	41651792	chr1_41629726_41629877:mpeak_3	chr1:41492870_41707815_SCMH1_NM_-	-	chr1:41627104_41651792:NM_001172220_intron_11_0_chr1_41627105_r	chr1	41639600	41639650	mpeak:2395	chr1:41492870-41707815-SCMH1	-
chr1	41629726	41651792	chr1_41629726_41629877:mpeak_3	chr1:41492870_41707815_SCMH1_NM_-	-	chr1:41627104_41651792:NM_001172220_intron_11_0_chr1_41627105_r	chr1	41649200	41649350	mpeak:2399	chr1:41492870-41707815-SCMH1	-
chr1	41629726	41651792	chr1_41629726_41629877:mpeak_3	chr1:41492870_41707815_SCMH1_NM_-	-	chr1:41627104_41651792:NM_012236_intron_12_0_chr1_41627105_r	chr1	41637150	41637250	mpeak:2389	chr1:41492870-41707815-SCMH1	-
chr1	41629726	41651792	chr1_41629726_41629877:mpeak_3	chr1:41492870_41707815_SCMH1_NM_-	-	chr1:41627104_41651792:NM_012236_intron_12_0_chr1_41627105_r	chr1	41637900	41638100	mpeak:2390	chr1:41492870-41707815-SCMH1	-
chr1	41629726	41651792	chr1_41629726_41629877:mpeak_3	chr1:41492870_41707815_SCMH1_NM_-	-	chr1:41627104_41651792:NM_012236_intron_12_0_chr1_41627105_r	chr1	41638800	41639000	mpeak:2392	chr1:41492870-41707815-SCMH1	-
chr1	41629726	41651792	chr1_41629726_41629877:mpeak_3	chr1:41492870_41707815_SCMH1_NM_-	-	chr1:41627104_41651792:NM_012236_intron_12_0_chr1_41627105_r	chr1	41639050	41639150	mpeak:2393	chr1:41492870-41707815-SCMH1	-
chr1	41629726	41651792	chr1_41629726_41629877:mpeak_3	chr1:41492870_41707815_SCMH1_NM_-	-	chr1:41627104_41651792:NM_012236_intron_12_0_chr1_41627105_r	chr1	41639600	41639650	mpeak:2395	chr1:41492870-41707815-SCMH1	-
chr1	41629726	41651792	chr1_41629726_41629877:mpeak_3	chr1:41492870_41707815_SCMH1_NM_-	-	chr1:41627104_41651792:NM_012236_intron_12_0_chr1_41627105_r	chr1	41649200	41649350	mpeak:2399	chr1:41492870-41707815-SCMH1	-
chr1	41629726	41651792	chr1_41629726_41629877:mpeak_3	chr1:41492870_41707815_SCMH1_NM_-	-	chr1:41627104_41651792:NM_001172219_intron_12_0_chr1_41627105_r	chr1	41637150	41637250	mpeak:2389	chr1:41492870-41707815-SCMH1	-
chr1	41629726	41651792	chr1_41629726_41629877:mpeak_3	chr1:41492870_41707815_SCMH1_NM_-	-	chr1:41627104_41651792:NM_001172219_intron_12_0_chr1_41627105_r	chr1	41637900	41638100	mpeak:2390	chr1:41492870-41707815-SCMH1	-
chr1	41629726	41651792	chr1_41629726_41629877:mpeak_3	chr1:41492870_41707815_SCMH1_NM_-	-	chr1:41627104_41651792:NM_001172219_intron_12_0_chr1_41627105_r	chr1	41638800	41639000	mpeak:2392	chr1:41492870-41707815-SCMH1	-
chr1	41629726	41651792	chr1_41629726_41629877:mpeak_3	chr1:41492870_41707815_SCMH1_NM_-	-	chr1:41627104_41651792:NM_001172219_intron_12_0_chr1_41627105_r	chr1	41639050	41639150	mpeak:2393	chr1:41492870-41707815-SCMH1	-
chr1	41629726	41651792	chr1_41629726_41629877:mpeak_3	chr1:41492870_41707815_SCMH1_NM_-	-	chr1:41627104_41651792:NM_001172219_intron_12_0_chr1_41627105_r	chr1	41639600	41639650	mpeak:2395	chr1:41492870-41707815-SCMH1	-
chr1	41629726	41651792	chr1_41629726_41629877:mpeak_3	chr1:41492870_41707815_SCMH1_NM_-	-	chr1:41627104_41651792:NM_001172219_intron_12_0_chr1_41627105_r	chr1	41649200	41649350	mpeak:2399	chr1:41492870-41707815-SCMH1	-
chr1	41629726	41651792	chr1_41629726_41629877:mpeak_3	chr1:41492870_41707815_SCMH1_NM_-	-	chr1:41627104_41651792:NM_001350667_intron_14_0_chr1_41627105_r	chr1	41637150	41637250	mpeak:2389	chr1:41492870-41707815-SCMH1	-
chr1	41629726	41651792	chr1_41629726_41629877:mpeak_3	chr1:41492870_41707815_SCMH1_NM_-	-	chr1:41627104_41651792:NM_001350667_intron_14_0_chr1_41627105_r	chr1	41637900	41638100	mpeak:2390	chr1:41492870-41707815-SCMH1	-
chr1	41629726	41651792	chr1_41629726_41629877:mpeak_3	chr1:41492870_41707815_SCMH1_NM_-	-	chr1:41627104_41651792:NM_001350667_intron_14_0_chr1_41627105_r	chr1	41638800	41639000	mpeak:2392	chr1:41492870-41707815-SCMH1	-
chr1	41629726	41651792	chr1_41629726_41629877:mpeak_3	chr1:41492870_41707815_SCMH1_NM_-	-	chr1:41627104_41651792:NM_001350667_intron_14_0_chr1_41627105_r	chr1	41639050	41639150	mpeak:2393	chr1:41492870-41707815-SCMH1	-
chr1	41629726	41651792	chr1_41629726_41629877:mpeak_3	chr1:41492870_41707815_SCMH1_NM_-	-	chr1:41627104_41651792:NM_001350667_intron_14_0_chr1_41627105_r	chr1	41639600	41639650	mpeak:2395	chr1:41492870-41707815-SCMH1	-
chr1	41629726	41651792	chr1_41629726_41629877:mpeak_3	chr1:41492870_41707815_SCMH1_NM_-	-	chr1:41627104_41651792:NM_001350667_intron_14_0_chr1_41627105_r	chr1	41649200	41649350	mpeak:2399	chr1:41492870-41707815-SCMH1	-
chr17	57078962	57089688	chr17_57078962_57079134:mpeak_36	chr17:57059999_57184266_TRIM37_NM_-	-	chr17:57079075_57089688:NM_001005207_intron_2_0_chr17_57079076_r	chr17	57079400	57082600	mpeak:72933	chr17:57059999-57184266-TRIM37	-
chr17	57078962	57089688	chr17_57078962_57079134:mpeak_36	chr17:57059999_57184266_TRIM37_NM_-	-	chr17:57076820_57089688:NM_001320989_intron_1_0_chr17_57076821_r	chr17	57079400	57082600	mpeak:72933	chr17:57059999-57184266-TRIM37	-
chr17	57078962	57089688	chr17_57078962_57079134:mpeak_36	chr17:57059999_57184266_TRIM37_NM_-	-	chr17:57079075_57089688:NM_001320987_intron_1_0_chr17_57079076_r	chr17	57079400	57082600	mpeak:72933	chr17:57059999-57184266-TRIM37	-
chr17	57078962	57089688	chr17_57078962_57079134:mpeak_36	chr17:57059999_57184266_TRIM37_NM_-	-	chr17:57076820_57089688:NM_001320988_intron_0_0_chr17_57076821_r	chr17	57079400	57082600	mpeak:72933	chr17:57059999-57184266-TRIM37	-
chr17	57078962	57089688	chr17_57078962_57079134:mpeak_36	chr17:57059999_57184266_TRIM37_NM_-	-	chr17:57076820_57089688:NM_001320990_intron_0_0_chr17_57076821_r	chr17	57079400	57082600	mpeak:72933	chr17:57059999-57184266-TRIM37	-
chr17	57078962	57089688	chr17_57078962_57079134:mpeak_36	chr17:57059999_57184266_TRIM37_NM_-	-	chr17:57079102_57089688:NM_001353082_intron_1_0_chr17_57079103_r	chr17	57079400	57082600	mpeak:72933	chr17:57059999-57184266-TRIM37	-
chr17	57078962	57089688	chr17_57078962_57079134:mpeak_36	chr17:57059999_57184266_TRIM37_NM_-	-	chr17:57079075_57089688:NM_001353083_intron_1_0_chr17_57079076_r	chr17	57079400	57082600	mpeak:72933	chr17:57059999-57184266-TRIM37	-
chr17	57078962	57089688	chr17_57078962_57079134:mpeak_36	chr17:57059999_57184266_TRIM37_NM_-	-	chr17:57079102_57089688:NM_001353084_intron_1_0_chr17_57079103_r	chr17	57079400	57082600	mpeak:72933	chr17:57059999-57184266-TRIM37	-
chr17	57078962	57089688	chr17_57078962_57079134:mpeak_36	chr17:57059999_57184266_TRIM37_NM_-	-	chr17:57079075_57089688:NM_001353085_intron_1_0_chr17_57079076_r	chr17	57079400	57082600	mpeak:72933	chr17:57059999-57184266-TRIM37	-
chr17	57078962	57089688	chr17_57078962_57079134:mpeak_36	chr17:57059999_57184266_TRIM37_NM_-	-	chr17:57079075_57089688:NM_001353086_intron_1_0_chr17_57079076_r	chr17	57079400	57082600	mpeak:72933	chr17:57059999-57184266-TRIM37	-
chr17	57078962	57089688	chr17_57078962_57079134:mpeak_36	chr17:57059999_57184266_TRIM37_NM_-	-	chr17:57079075_57089688:NM_015294_intron_1_0_chr17_57079076_r	chr17	57079400	57082600	mpeak:72933	chr17:57059999-57184266-TRIM37	-
chr17	57078962	57089688	chr17_57078962_57079134:mpeak_36	chr17:57059999_57184266_TRIM37_NM_-	-	chr17:57079116_57089688:NR_148346_intron_1_0_chr17_57079117_r	chr17	57079400	57082600	mpeak:72933	chr17:57059999-57184266-TRIM37	-
chr17	57078962	57089688	chr17_57078962_57079134:mpeak_36	chr17:57059999_57184266_TRIM37_NM_-	-	chr17:57079116_57089688:NR_148347_intron_1_0_chr17_57079117_r	chr17	57079400	57082600	mpeak:72933	chr17:57059999-57184266-TRIM37	-
chr17	57112350	57119173	chr17_57112350_57112490:mpeak_37	chr17:57059999_57184266_TRIM37_NM_-	-	chr17:57109451_57119173:NM_001005207_intron_7_0_chr17_57109452_r	chr17	57113050	57113250	mpeak:72992	chr17:57059999-57184266-TRIM37	-
chr17	57112350	57119173	chr17_57112350_57112490:mpeak_37	chr17:57059999_57184266_TRIM37_NM_-	-	chr17:57109451_57119173:NM_001320989_intron_6_0_chr17_57109452_r	chr17	57113050	57113250	mpeak:72992	chr17:57059999-57184266-TRIM37	-
chr17	57112350	57119173	chr17_57112350_57112490:mpeak_37	chr17:57059999_57184266_TRIM37_NM_-	-	chr17:57109451_57119173:NM_001320987_intron_6_0_chr17_57109452_r	chr17	57113050	57113250	mpeak:72992	chr17:57059999-57184266-TRIM37	-
chr17	57112350	57119173	chr17_57112350_57112490:mpeak_37	chr17:57059999_57184266_TRIM37_NM_-	-	chr17:57109451_57119173:NM_001320988_intron_5_0_chr17_57109452_r	chr17	57113050	57113250	mpeak:72992	chr17:57059999-57184266-TRIM37	-
chr17	57112350	57119173	chr17_57112350_57112490:mpeak_37	chr17:57059999_57184266_TRIM37_NM_-	-	chr17:57109451_57119173:NM_001320990_intron_5_0_chr17_57109452_r	chr17	57113050	57113250	mpeak:72992	chr17:57059999-57184266-TRIM37	-
chr17	57112350	57119173	chr17_57112350_57112490:mpeak_37	chr17:57059999_57184266_TRIM37_NM_-	-	chr17:57109451_57119173:NM_001353082_intron_6_0_chr17_57109452_r	chr17	57113050	57113250	mpeak:72992	chr17:57059999-57184266-TRIM37	-
chr17	57112350	57119173	chr17_57112350_57112490:mpeak_37	chr17:57059999_57184266_TRIM37_NM_-	-	chr17:57109451_57119173:NM_001353083_intron_6_0_chr17_57109452_r	chr17	57113050	57113250	mpeak:72992	chr17:57059999-57184266-TRIM37	-
chr17	57112350	57119173	chr17_57112350_57112490:mpeak_37	chr17:57059999_57184266_TRIM37_NM_-	-	chr17:57109451_57119173:NM_001353084_intron_6_0_chr17_57109452_r	chr17	57113050	57113250	mpeak:72992	chr17:57059999-57184266-TRIM37	-
chr17	57112350	57119173	chr17_57112350_57112490:mpeak_37	chr17:57059999_57184266_TRIM37_NM_-	-	chr17:57109451_57119173:NM_001353085_intron_6_0_chr17_57109452_r	chr17	57113050	57113250	mpeak:72992	chr17:57059999-57184266-TRIM37	-
chr17	57112350	57119173	chr17_57112350_57112490:mpeak_37	chr17:57059999_57184266_TRIM37_NM_-	-	chr17:57109451_57119173:NM_001353086_intron_6_0_chr17_57109452_r	chr17	57113050	57113250	mpeak:72992	chr17:57059999-57184266-TRIM37	-
chr17	57112350	57119173	chr17_57112350_57112490:mpeak_37	chr17:57059999_57184266_TRIM37_NM_-	-	chr17:57109451_57119173:NM_015294_intron_6_0_chr17_57109452_r	chr17	57113050	57113250	mpeak:72992	chr17:57059999-57184266-TRIM37	-
chr17	57112350	57119173	chr17_57112350_57112490:mpeak_37	chr17:57059999_57184266_TRIM37_NM_-	-	chr17:57109451_57119173:NR_148346_intron_6_0_chr17_57109452_r	chr17	57113050	57113250	mpeak:72992	chr17:57059999-57184266-TRIM37	-
chr17	57112350	57119173	chr17_57112350_57112490:mpeak_37	chr17:57059999_57184266_TRIM37_NM_-	-	chr17:57109451_57119173:NR_148347_intron_6_0_chr17_57109452_r	chr17	57113050	57113250	mpeak:72992	chr17:57059999-57184266-TRIM37	-
chr17	57154035	57157114	chr17_57154035_57154085:mpeak_39	chr17:57059999_57184266_TRIM37_NM_-	-	chr17:57153075_57157114:NM_001005207_intron_17_0_chr17_57153076_r	chr17	57154550	57154900	mpeak:73061	chr17:57059999-57184266-TRIM37	-
chr17	57154035	57157114	chr17_57154035_57154085:mpeak_39	chr17:57059999_57184266_TRIM37_NM_-	-	chr17:57153075_57157114:NM_001005207_intron_17_0_chr17_57153076_r	chr17	57155500	57157100	mpeak:73062	chr17:57059999-57184266-TRIM37	-
chr17	57154035	57157114	chr17_57154035_57154085:mpeak_39	chr17:57059999_57184266_TRIM37_NM_-	-	chr17:57153075_57157114:NM_001320989_intron_16_0_chr17_57153076_r	chr17	57154550	57154900	mpeak:73061	chr17:57059999-57184266-TRIM37	-
chr17	57154035	57157114	chr17_57154035_57154085:mpeak_39	chr17:57059999_57184266_TRIM37_NM_-	-	chr17:57153075_57157114:NM_001320989_intron_16_0_chr17_57153076_r	chr17	57155500	57157100	mpeak:73062	chr17:57059999-57184266-TRIM37	-
chr17	57154035	57157114	chr17_57154035_57154085:mpeak_39	chr17:57059999_57184266_TRIM37_NM_-	-	chr17:57153075_57157114:NM_001320987_intron_16_0_chr17_57153076_r	chr17	57154550	57154900	mpeak:73061	chr17:57059999-57184266-TRIM37	-
chr17	57154035	57157114	chr17_57154035_57154085:mpeak_39	chr17:57059999_57184266_TRIM37_NM_-	-	chr17:57153075_57157114:NM_001320987_intron_16_0_chr17_57153076_r	chr17	57155500	57157100	mpeak:73062	chr17:57059999-57184266-TRIM37	-
chr17	57154035	57157114	chr17_57154035_57154085:mpeak_39	chr17:57059999_57184266_TRIM37_NM_-	-	chr17:57153075_57157114:NM_001320988_intron_15_0_chr17_57153076_r	chr17	57154550	57154900	mpeak:73061	chr17:57059999-57184266-TRIM37	-
chr17	57154035	57157114	chr17_57154035_57154085:mpeak_39	chr17:57059999_57184266_TRIM37_NM_-	-	chr17:57153075_57157114:NM_001320988_intron_15_0_chr17_57153076_r	chr17	57155500	57157100	mpeak:73062	chr17:57059999-57184266-TRIM37	-
chr17	57154035	57157114	chr17_57154035_57154085:mpeak_39	chr17:57059999_57184266_TRIM37_NM_-	-	chr17:57153075_57157114:NM_001320990_intron_15_0_chr17_57153076_r	chr17	57154550	57154900	mpeak:73061	chr17:57059999-57184266-TRIM37	-
chr17	57154035	57157114	chr17_57154035_57154085:mpeak_39	chr17:57059999_57184266_TRIM37_NM_-	-	chr17:57153075_57157114:NM_001320990_intron_15_0_chr17_57153076_r	chr17	57155500	57157100	mpeak:73062	chr17:57059999-57184266-TRIM37	-
chr17	57154035	57157114	chr17_57154035_57154085:mpeak_39	chr17:57059999_57184266_TRIM37_NM_-	-	chr17:57153075_57157114:NM_001353082_intron_16_0_chr17_57153076_r	chr17	57154550	57154900	mpeak:73061	chr17:57059999-57184266-TRIM37	-
chr17	57154035	57157114	chr17_57154035_57154085:mpeak_39	chr17:57059999_57184266_TRIM37_NM_-	-	chr17:57153075_57157114:NM_001353082_intron_16_0_chr17_57153076_r	chr17	57155500	57157100	mpeak:73062	chr17:57059999-57184266-TRIM37	-
chr17	57154035	57157114	chr17_57154035_57154085:mpeak_39	chr17:57059999_57184266_TRIM37_NM_-	-	chr17:57153075_57157114:NM_001353083_intron_16_0_chr17_57153076_r	chr17	57154550	57154900	mpeak:73061	chr17:57059999-57184266-TRIM37	-
chr17	57154035	57157114	chr17_57154035_57154085:mpeak_39	chr17:57059999_57184266_TRIM37_NM_-	-	chr17:57153075_57157114:NM_001353083_intron_16_0_chr17_57153076_r	chr17	57155500	57157100	mpeak:73062	chr17:57059999-57184266-TRIM37	-
chr17	57154035	57157114	chr17_57154035_57154085:mpeak_39	chr17:57059999_57184266_TRIM37_NM_-	-	chr17:57153075_57157114:NM_001353084_intron_16_0_chr17_57153076_r	chr17	57154550	57154900	mpeak:73061	chr17:57059999-57184266-TRIM37	-
chr17	57154035	57157114	chr17_57154035_57154085:mpeak_39	chr17:57059999_57184266_TRIM37_NM_-	-	chr17:57153075_57157114:NM_001353084_intron_16_0_chr17_57153076_r	chr17	57155500	57157100	mpeak:73062	chr17:57059999-57184266-TRIM37	-
chr17	57154035	57157114	chr17_57154035_57154085:mpeak_39	chr17:57059999_57184266_TRIM37_NM_-	-	chr17:57153075_57157114:NM_001353085_intron_16_0_chr17_57153076_r	chr17	57154550	57154900	mpeak:73061	chr17:57059999-57184266-TRIM37	-
chr17	57154035	57157114	chr17_57154035_57154085:mpeak_39	chr17:57059999_57184266_TRIM37_NM_-	-	chr17:57153075_57157114:NM_001353085_intron_16_0_chr17_57153076_r	chr17	57155500	57157100	mpeak:73062	chr17:57059999-57184266-TRIM37	-
chr17	57154035	57157114	chr17_57154035_57154085:mpeak_39	chr17:57059999_57184266_TRIM37_NM_-	-	chr17:57153075_57157114:NM_001353086_intron_15_0_chr17_57153076_r	chr17	57154550	57154900	mpeak:73061	chr17:57059999-57184266-TRIM37	-
chr17	57154035	57157114	chr17_57154035_57154085:mpeak_39	chr17:57059999_57184266_TRIM37_NM_-	-	chr17:57153075_57157114:NM_001353086_intron_15_0_chr17_57153076_r	chr17	57155500	57157100	mpeak:73062	chr17:57059999-57184266-TRIM37	-
chr17	57154035	57157114	chr17_57154035_57154085:mpeak_39	chr17:57059999_57184266_TRIM37_NM_-	-	chr17:57153075_57157114:NM_015294_intron_16_0_chr17_57153076_r	chr17	57154550	57154900	mpeak:73061	chr17:57059999-57184266-TRIM37	-
chr17	57154035	57157114	chr17_57154035_57154085:mpeak_39	chr17:57059999_57184266_TRIM37_NM_-	-	chr17:57153075_57157114:NM_015294_intron_16_0_chr17_57153076_r	chr17	57155500	57157100	mpeak:73062	chr17:57059999-57184266-TRIM37	-
chr17	57154035	57157114	chr17_57154035_57154085:mpeak_39	chr17:57059999_57184266_TRIM37_NM_-	-	chr17:57153075_57157114:NR_148346_intron_16_0_chr17_57153076_r	chr17	57154550	57154900	mpeak:73061	chr17:57059999-57184266-TRIM37	-
chr17	57154035	57157114	chr17_57154035_57154085:mpeak_39	chr17:57059999_57184266_TRIM37_NM_-	-	chr17:57153075_57157114:NR_148346_intron_16_0_chr17_57153076_r	chr17	57155500	57157100	mpeak:73062	chr17:57059999-57184266-TRIM37	-
chr17	57154035	57157114	chr17_57154035_57154085:mpeak_39	chr17:57059999_57184266_TRIM37_NM_-	-	chr17:57153075_57157114:NR_148347_intron_16_0_chr17_57153076_r	chr17	57154550	57154900	mpeak:73061	chr17:57059999-57184266-TRIM37	-
chr17	57154035	57157114	chr17_57154035_57154085:mpeak_39	chr17:57059999_57184266_TRIM37_NM_-	-	chr17:57153075_57157114:NR_148347_intron_16_0_chr17_57153076_r	chr17	57155500	57157100	mpeak:73062	chr17:57059999-57184266-TRIM37	-
chr17	57170885	57181653	chr17_57170885_57171021:mpeak_40	chr17:57059999_57184266_TRIM37_NM_-	-	chr17:57168701_57181653:NM_001005207_intron_22_0_chr17_57168702_r	chr17	57170850	57171200	mpeak:73086	chr17:57059999-57184266-TRIM37	-
chr17	57170885	57181653	chr17_57170885_57171021:mpeak_40	chr17:57059999_57184266_TRIM37_NM_-	-	chr17:57168701_57181653:NM_001005207_intron_22_0_chr17_57168702_r	chr17	57171450	57173250	mpeak:73088	chr17:57059999-57184266-TRIM37	-
chr17	57170885	57181653	chr17_57170885_57171021:mpeak_40	chr17:57059999_57184266_TRIM37_NM_-	-	chr17:57168701_57181653:NM_001005207_intron_22_0_chr17_57168702_r	chr17	57173300	57173650	mpeak:73089	chr17:57059999-57184266-TRIM37	-
chr17	57170885	57181653	chr17_57170885_57171021:mpeak_40	chr17:57059999_57184266_TRIM37_NM_-	-	chr17:57168701_57181653:NM_001005207_intron_22_0_chr17_57168702_r	chr17	57173950	57175000	mpeak:73091	chr17:57059999-57184266-TRIM37	-
chr17	57170885	57181653	chr17_57170885_57171021:mpeak_40	chr17:57059999_57184266_TRIM37_NM_-	-	chr17:57168701_57181653:NM_001005207_intron_22_0_chr17_57168702_r	chr17	57175050	57175750	mpeak:73092	chr17:57059999-57184266-TRIM37	-
chr17	57170885	57181653	chr17_57170885_57171021:mpeak_40	chr17:57059999_57184266_TRIM37_NM_-	-	chr17:57168701_57181653:NM_001005207_intron_22_0_chr17_57168702_r	chr17	57177250	57178100	mpeak:73096	chr17:57059999-57184266-TRIM37	-
chr17	57170885	57181653	chr17_57170885_57171021:mpeak_40	chr17:57059999_57184266_TRIM37_NM_-	-	chr17:57168701_57181653:NM_001005207_intron_22_0_chr17_57168702_r	chr17	57178300	57179000	mpeak:73097	chr17:57059999-57184266-TRIM37	-
chr17	57170885	57181653	chr17_57170885_57171021:mpeak_40	chr17:57059999_57184266_TRIM37_NM_-	-	chr17:57168701_57181653:NM_001005207_intron_22_0_chr17_57168702_r	chr17	57181250	57181650	mpeak:73101	chr17:57059999-57184266-TRIM37	-
chr17	57170885	57181653	chr17_57170885_57171021:mpeak_40	chr17:57059999_57184266_TRIM37_NM_-	-	chr17:57168701_57181653:NM_001320989_intron_21_0_chr17_57168702_r	chr17	57170850	57171200	mpeak:73086	chr17:57059999-57184266-TRIM37	-
chr17	57170885	57181653	chr17_57170885_57171021:mpeak_40	chr17:57059999_57184266_TRIM37_NM_-	-	chr17:57168701_57181653:NM_001320989_intron_21_0_chr17_57168702_r	chr17	57171450	57173250	mpeak:73088	chr17:57059999-57184266-TRIM37	-
chr17	57170885	57181653	chr17_57170885_57171021:mpeak_40	chr17:57059999_57184266_TRIM37_NM_-	-	chr17:57168701_57181653:NM_001320989_intron_21_0_chr17_57168702_r	chr17	57173300	57173650	mpeak:73089	chr17:57059999-57184266-TRIM37	-
chr17	57170885	57181653	chr17_57170885_57171021:mpeak_40	chr17:57059999_57184266_TRIM37_NM_-	-	chr17:57168701_57181653:NM_001320989_intron_21_0_chr17_57168702_r	chr17	57173950	57175000	mpeak:73091	chr17:57059999-57184266-TRIM37	-
chr17	57170885	57181653	chr17_57170885_57171021:mpeak_40	chr17:57059999_57184266_TRIM37_NM_-	-	chr17:57168701_57181653:NM_001320989_intron_21_0_chr17_57168702_r	chr17	57175050	57175750	mpeak:73092	chr17:57059999-57184266-TRIM37	-
chr17	57170885	57181653	chr17_57170885_57171021:mpeak_40	chr17:57059999_57184266_TRIM37_NM_-	-	chr17:57168701_57181653:NM_001320989_intron_21_0_chr17_57168702_r	chr17	57177250	57178100	mpeak:73096	chr17:57059999-57184266-TRIM37	-
chr17	57170885	57181653	chr17_57170885_57171021:mpeak_40	chr17:57059999_57184266_TRIM37_NM_-	-	chr17:57168701_57181653:NM_001320989_intron_21_0_chr17_57168702_r	chr17	57178300	57179000	mpeak:73097	chr17:57059999-57184266-TRIM37	-
chr17	57170885	57181653	chr17_57170885_57171021:mpeak_40	chr17:57059999_57184266_TRIM37_NM_-	-	chr17:57168701_57181653:NM_001320989_intron_21_0_chr17_57168702_r	chr17	57181250	57181650	mpeak:73101	chr17:57059999-57184266-TRIM37	-
chr17	57170885	57183801	chr17_57170885_57171021:mpeak_40	chr17:57059999_57184266_TRIM37_NM_-	-	chr17:57168701_57183801:NM_001320987_intron_21_0_chr17_57168702_r	chr17	57170850	57171200	mpeak:73086	chr17:57059999-57184266-TRIM37	-
chr17	57170885	57183801	chr17_57170885_57171021:mpeak_40	chr17:57059999_57184266_TRIM37_NM_-	-	chr17:57168701_57183801:NM_001320987_intron_21_0_chr17_57168702_r	chr17	57171450	57173250	mpeak:73088	chr17:57059999-57184266-TRIM37	-
chr17	57170885	57183801	chr17_57170885_57171021:mpeak_40	chr17:57059999_57184266_TRIM37_NM_-	-	chr17:57168701_57183801:NM_001320987_intron_21_0_chr17_57168702_r	chr17	57173300	57173650	mpeak:73089	chr17:57059999-57184266-TRIM37	-
chr17	57170885	57183801	chr17_57170885_57171021:mpeak_40	chr17:57059999_57184266_TRIM37_NM_-	-	chr17:57168701_57183801:NM_001320987_intron_21_0_chr17_57168702_r	chr17	57173950	57175000	mpeak:73091	chr17:57059999-57184266-TRIM37	-
chr17	57170885	57183801	chr17_57170885_57171021:mpeak_40	chr17:57059999_57184266_TRIM37_NM_-	-	chr17:57168701_57183801:NM_001320987_intron_21_0_chr17_57168702_r	chr17	57175050	57175750	mpeak:73092	chr17:57059999-57184266-TRIM37	-
chr17	57170885	57183801	chr17_57170885_57171021:mpeak_40	chr17:57059999_57184266_TRIM37_NM_-	-	chr17:57168701_57183801:NM_001320987_intron_21_0_chr17_57168702_r	chr17	57177250	57178100	mpeak:73096	chr17:57059999-57184266-TRIM37	-
chr17	57170885	57183801	chr17_57170885_57171021:mpeak_40	chr17:57059999_57184266_TRIM37_NM_-	-	chr17:57168701_57183801:NM_001320987_intron_21_0_chr17_57168702_r	chr17	57178300	57179000	mpeak:73097	chr17:57059999-57184266-TRIM37	-
chr17	57170885	57183801	chr17_57170885_57171021:mpeak_40	chr17:57059999_57184266_TRIM37_NM_-	-	chr17:57168701_57183801:NM_001320987_intron_21_0_chr17_57168702_r	chr17	57181250	57181650	mpeak:73101	chr17:57059999-57184266-TRIM37	-
chr17	57170885	57181653	chr17_57170885_57171021:mpeak_40	chr17:57059999_57184266_TRIM37_NM_-	-	chr17:57168701_57181653:NM_001320988_intron_20_0_chr17_57168702_r	chr17	57170850	57171200	mpeak:73086	chr17:57059999-57184266-TRIM37	-
chr17	57170885	57181653	chr17_57170885_57171021:mpeak_40	chr17:57059999_57184266_TRIM37_NM_-	-	chr17:57168701_57181653:NM_001320988_intron_20_0_chr17_57168702_r	chr17	57171450	57173250	mpeak:73088	chr17:57059999-57184266-TRIM37	-
chr17	57170885	57181653	chr17_57170885_57171021:mpeak_40	chr17:57059999_57184266_TRIM37_NM_-	-	chr17:57168701_57181653:NM_001320988_intron_20_0_chr17_57168702_r	chr17	57173300	57173650	mpeak:73089	chr17:57059999-57184266-TRIM37	-
chr17	57170885	57181653	chr17_57170885_57171021:mpeak_40	chr17:57059999_57184266_TRIM37_NM_-	-	chr17:57168701_57181653:NM_001320988_intron_20_0_chr17_57168702_r	chr17	57173950	57175000	mpeak:73091	chr17:57059999-57184266-TRIM37	-
chr17	57170885	57181653	chr17_57170885_57171021:mpeak_40	chr17:57059999_57184266_TRIM37_NM_-	-	chr17:57168701_57181653:NM_001320988_intron_20_0_chr17_57168702_r	chr17	57175050	57175750	mpeak:73092	chr17:57059999-57184266-TRIM37	-
chr17	57170885	57181653	chr17_57170885_57171021:mpeak_40	chr17:57059999_57184266_TRIM37_NM_-	-	chr17:57168701_57181653:NM_001320988_intron_20_0_chr17_57168702_r	chr17	57177250	57178100	mpeak:73096	chr17:57059999-57184266-TRIM37	-
chr17	57170885	57181653	chr17_57170885_57171021:mpeak_40	chr17:57059999_57184266_TRIM37_NM_-	-	chr17:57168701_57181653:NM_001320988_intron_20_0_chr17_57168702_r	chr17	57178300	57179000	mpeak:73097	chr17:57059999-57184266-TRIM37	-
chr17	57170885	57181653	chr17_57170885_57171021:mpeak_40	chr17:57059999_57184266_TRIM37_NM_-	-	chr17:57168701_57181653:NM_001320988_intron_20_0_chr17_57168702_r	chr17	57181250	57181650	mpeak:73101	chr17:57059999-57184266-TRIM37	-
chr17	57170885	57181653	chr17_57170885_57171021:mpeak_40	chr17:57059999_57184266_TRIM37_NM_-	-	chr17:57168701_57181653:NM_001320990_intron_21_0_chr17_57168702_r	chr17	57170850	57171200	mpeak:73086	chr17:57059999-57184266-TRIM37	-
chr17	57170885	57181653	chr17_57170885_57171021:mpeak_40	chr17:57059999_57184266_TRIM37_NM_-	-	chr17:57168701_57181653:NM_001320990_intron_21_0_chr17_57168702_r	chr17	57171450	57173250	mpeak:73088	chr17:57059999-57184266-TRIM37	-
chr17	57170885	57181653	chr17_57170885_57171021:mpeak_40	chr17:57059999_57184266_TRIM37_NM_-	-	chr17:57168701_57181653:NM_001320990_intron_21_0_chr17_57168702_r	chr17	57173300	57173650	mpeak:73089	chr17:57059999-57184266-TRIM37	-
chr17	57170885	57181653	chr17_57170885_57171021:mpeak_40	chr17:57059999_57184266_TRIM37_NM_-	-	chr17:57168701_57181653:NM_001320990_intron_21_0_chr17_57168702_r	chr17	57173950	57175000	mpeak:73091	chr17:57059999-57184266-TRIM37	-
chr17	57170885	57181653	chr17_57170885_57171021:mpeak_40	chr17:57059999_57184266_TRIM37_NM_-	-	chr17:57168701_57181653:NM_001320990_intron_21_0_chr17_57168702_r	chr17	57175050	57175750	mpeak:73092	chr17:57059999-57184266-TRIM37	-
chr17	57170885	57181653	chr17_57170885_57171021:mpeak_40	chr17:57059999_57184266_TRIM37_NM_-	-	chr17:57168701_57181653:NM_001320990_intron_21_0_chr17_57168702_r	chr17	57177250	57178100	mpeak:73096	chr17:57059999-57184266-TRIM37	-
chr17	57170885	57181653	chr17_57170885_57171021:mpeak_40	chr17:57059999_57184266_TRIM37_NM_-	-	chr17:57168701_57181653:NM_001320990_intron_21_0_chr17_57168702_r	chr17	57178300	57179000	mpeak:73097	chr17:57059999-57184266-TRIM37	-
chr17	57170885	57181653	chr17_57170885_57171021:mpeak_40	chr17:57059999_57184266_TRIM37_NM_-	-	chr17:57168701_57181653:NM_001320990_intron_21_0_chr17_57168702_r	chr17	57181250	57181650	mpeak:73101	chr17:57059999-57184266-TRIM37	-
chr17	57170885	57183801	chr17_57170885_57171021:mpeak_40	chr17:57059999_57184266_TRIM37_NM_-	-	chr17:57168701_57183801:NM_001353082_intron_21_0_chr17_57168702_r	chr17	57170850	57171200	mpeak:73086	chr17:57059999-57184266-TRIM37	-
chr17	57170885	57183801	chr17_57170885_57171021:mpeak_40	chr17:57059999_57184266_TRIM37_NM_-	-	chr17:57168701_57183801:NM_001353082_intron_21_0_chr17_57168702_r	chr17	57171450	57173250	mpeak:73088	chr17:57059999-57184266-TRIM37	-
chr17	57170885	57183801	chr17_57170885_57171021:mpeak_40	chr17:57059999_57184266_TRIM37_NM_-	-	chr17:57168701_57183801:NM_001353082_intron_21_0_chr17_57168702_r	chr17	57173300	57173650	mpeak:73089	chr17:57059999-57184266-TRIM37	-
chr17	57170885	57183801	chr17_57170885_57171021:mpeak_40	chr17:57059999_57184266_TRIM37_NM_-	-	chr17:57168701_57183801:NM_001353082_intron_21_0_chr17_57168702_r	chr17	57173950	57175000	mpeak:73091	chr17:57059999-57184266-TRIM37	-
chr17	57170885	57183801	chr17_57170885_57171021:mpeak_40	chr17:57059999_57184266_TRIM37_NM_-	-	chr17:57168701_57183801:NM_001353082_intron_21_0_chr17_57168702_r	chr17	57175050	57175750	mpeak:73092	chr17:57059999-57184266-TRIM37	-
chr17	57170885	57183801	chr17_57170885_57171021:mpeak_40	chr17:57059999_57184266_TRIM37_NM_-	-	chr17:57168701_57183801:NM_001353082_intron_21_0_chr17_57168702_r	chr17	57177250	57178100	mpeak:73096	chr17:57059999-57184266-TRIM37	-
chr17	57170885	57183801	chr17_57170885_57171021:mpeak_40	chr17:57059999_57184266_TRIM37_NM_-	-	chr17:57168701_57183801:NM_001353082_intron_21_0_chr17_57168702_r	chr17	57178300	57179000	mpeak:73097	chr17:57059999-57184266-TRIM37	-
chr17	57170885	57183801	chr17_57170885_57171021:mpeak_40	chr17:57059999_57184266_TRIM37_NM_-	-	chr17:57168701_57183801:NM_001353082_intron_21_0_chr17_57168702_r	chr17	57181250	57181650	mpeak:73101	chr17:57059999-57184266-TRIM37	-
chr17	57170885	57181653	chr17_57170885_57171021:mpeak_40	chr17:57059999_57184266_TRIM37_NM_-	-	chr17:57168701_57181653:NM_001353083_intron_21_0_chr17_57168702_r	chr17	57170850	57171200	mpeak:73086	chr17:57059999-57184266-TRIM37	-
chr17	57170885	57181653	chr17_57170885_57171021:mpeak_40	chr17:57059999_57184266_TRIM37_NM_-	-	chr17:57168701_57181653:NM_001353083_intron_21_0_chr17_57168702_r	chr17	57171450	57173250	mpeak:73088	chr17:57059999-57184266-TRIM37	-
chr17	57170885	57181653	chr17_57170885_57171021:mpeak_40	chr17:57059999_57184266_TRIM37_NM_-	-	chr17:57168701_57181653:NM_001353083_intron_21_0_chr17_57168702_r	chr17	57173300	57173650	mpeak:73089	chr17:57059999-57184266-TRIM37	-
chr17	57170885	57181653	chr17_57170885_57171021:mpeak_40	chr17:57059999_57184266_TRIM37_NM_-	-	chr17:57168701_57181653:NM_001353083_intron_21_0_chr17_57168702_r	chr17	57173950	57175000	mpeak:73091	chr17:57059999-57184266-TRIM37	-
chr17	57170885	57181653	chr17_57170885_57171021:mpeak_40	chr17:57059999_57184266_TRIM37_NM_-	-	chr17:57168701_57181653:NM_001353083_intron_21_0_chr17_57168702_r	chr17	57175050	57175750	mpeak:73092	chr17:57059999-57184266-TRIM37	-
chr17	57170885	57181653	chr17_57170885_57171021:mpeak_40	chr17:57059999_57184266_TRIM37_NM_-	-	chr17:57168701_57181653:NM_001353083_intron_21_0_chr17_57168702_r	chr17	57177250	57178100	mpeak:73096	chr17:57059999-57184266-TRIM37	-
chr17	57170885	57181653	chr17_57170885_57171021:mpeak_40	chr17:57059999_57184266_TRIM37_NM_-	-	chr17:57168701_57181653:NM_001353083_intron_21_0_chr17_57168702_r	chr17	57178300	57179000	mpeak:73097	chr17:57059999-57184266-TRIM37	-
chr17	57170885	57181653	chr17_57170885_57171021:mpeak_40	chr17:57059999_57184266_TRIM37_NM_-	-	chr17:57168701_57181653:NM_001353083_intron_21_0_chr17_57168702_r	chr17	57181250	57181650	mpeak:73101	chr17:57059999-57184266-TRIM37	-
chr17	57170885	57181653	chr17_57170885_57171021:mpeak_40	chr17:57059999_57184266_TRIM37_NM_-	-	chr17:57168701_57181653:NM_001353084_intron_21_0_chr17_57168702_r	chr17	57170850	57171200	mpeak:73086	chr17:57059999-57184266-TRIM37	-
chr17	57170885	57181653	chr17_57170885_57171021:mpeak_40	chr17:57059999_57184266_TRIM37_NM_-	-	chr17:57168701_57181653:NM_001353084_intron_21_0_chr17_57168702_r	chr17	57171450	57173250	mpeak:73088	chr17:57059999-57184266-TRIM37	-
chr17	57170885	57181653	chr17_57170885_57171021:mpeak_40	chr17:57059999_57184266_TRIM37_NM_-	-	chr17:57168701_57181653:NM_001353084_intron_21_0_chr17_57168702_r	chr17	57173300	57173650	mpeak:73089	chr17:57059999-57184266-TRIM37	-
chr17	57170885	57181653	chr17_57170885_57171021:mpeak_40	chr17:57059999_57184266_TRIM37_NM_-	-	chr17:57168701_57181653:NM_001353084_intron_21_0_chr17_57168702_r	chr17	57173950	57175000	mpeak:73091	chr17:57059999-57184266-TRIM37	-
chr17	57170885	57181653	chr17_57170885_57171021:mpeak_40	chr17:57059999_57184266_TRIM37_NM_-	-	chr17:57168701_57181653:NM_001353084_intron_21_0_chr17_57168702_r	chr17	57175050	57175750	mpeak:73092	chr17:57059999-57184266-TRIM37	-
chr17	57170885	57181653	chr17_57170885_57171021:mpeak_40	chr17:57059999_57184266_TRIM37_NM_-	-	chr17:57168701_57181653:NM_001353084_intron_21_0_chr17_57168702_r	chr17	57177250	57178100	mpeak:73096	chr17:57059999-57184266-TRIM37	-
chr17	57170885	57181653	chr17_57170885_57171021:mpeak_40	chr17:57059999_57184266_TRIM37_NM_-	-	chr17:57168701_57181653:NM_001353084_intron_21_0_chr17_57168702_r	chr17	57178300	57179000	mpeak:73097	chr17:57059999-57184266-TRIM37	-
chr17	57170885	57181653	chr17_57170885_57171021:mpeak_40	chr17:57059999_57184266_TRIM37_NM_-	-	chr17:57168701_57181653:NM_001353084_intron_21_0_chr17_57168702_r	chr17	57181250	57181650	mpeak:73101	chr17:57059999-57184266-TRIM37	-
chr17	57170885	57183801	chr17_57170885_57171021:mpeak_40	chr17:57059999_57184266_TRIM37_NM_-	-	chr17:57168701_57183801:NM_001353085_intron_20_0_chr17_57168702_r	chr17	57170850	57171200	mpeak:73086	chr17:57059999-57184266-TRIM37	-
chr17	57170885	57183801	chr17_57170885_57171021:mpeak_40	chr17:57059999_57184266_TRIM37_NM_-	-	chr17:57168701_57183801:NM_001353085_intron_20_0_chr17_57168702_r	chr17	57171450	57173250	mpeak:73088	chr17:57059999-57184266-TRIM37	-
chr17	57170885	57183801	chr17_57170885_57171021:mpeak_40	chr17:57059999_57184266_TRIM37_NM_-	-	chr17:57168701_57183801:NM_001353085_intron_20_0_chr17_57168702_r	chr17	57173300	57173650	mpeak:73089	chr17:57059999-57184266-TRIM37	-
chr17	57170885	57183801	chr17_57170885_57171021:mpeak_40	chr17:57059999_57184266_TRIM37_NM_-	-	chr17:57168701_57183801:NM_001353085_intron_20_0_chr17_57168702_r	chr17	57173950	57175000	mpeak:73091	chr17:57059999-57184266-TRIM37	-
chr17	57170885	57183801	chr17_57170885_57171021:mpeak_40	chr17:57059999_57184266_TRIM37_NM_-	-	chr17:57168701_57183801:NM_001353085_intron_20_0_chr17_57168702_r	chr17	57175050	57175750	mpeak:73092	chr17:57059999-57184266-TRIM37	-
chr17	57170885	57183801	chr17_57170885_57171021:mpeak_40	chr17:57059999_57184266_TRIM37_NM_-	-	chr17:57168701_57183801:NM_001353085_intron_20_0_chr17_57168702_r	chr17	57177250	57178100	mpeak:73096	chr17:57059999-57184266-TRIM37	-
chr17	57170885	57183801	chr17_57170885_57171021:mpeak_40	chr17:57059999_57184266_TRIM37_NM_-	-	chr17:57168701_57183801:NM_001353085_intron_20_0_chr17_57168702_r	chr17	57178300	57179000	mpeak:73097	chr17:57059999-57184266-TRIM37	-
chr17	57170885	57183801	chr17_57170885_57171021:mpeak_40	chr17:57059999_57184266_TRIM37_NM_-	-	chr17:57168701_57183801:NM_001353085_intron_20_0_chr17_57168702_r	chr17	57181250	57181650	mpeak:73101	chr17:57059999-57184266-TRIM37	-
chr17	57170885	57181653	chr17_57170885_57171021:mpeak_40	chr17:57059999_57184266_TRIM37_NM_-	-	chr17:57168701_57181653:NM_001353086_intron_20_0_chr17_57168702_r	chr17	57170850	57171200	mpeak:73086	chr17:57059999-57184266-TRIM37	-
chr17	57170885	57181653	chr17_57170885_57171021:mpeak_40	chr17:57059999_57184266_TRIM37_NM_-	-	chr17:57168701_57181653:NM_001353086_intron_20_0_chr17_57168702_r	chr17	57171450	57173250	mpeak:73088	chr17:57059999-57184266-TRIM37	-
chr17	57170885	57181653	chr17_57170885_57171021:mpeak_40	chr17:57059999_57184266_TRIM37_NM_-	-	chr17:57168701_57181653:NM_001353086_intron_20_0_chr17_57168702_r	chr17	57173300	57173650	mpeak:73089	chr17:57059999-57184266-TRIM37	-
chr17	57170885	57181653	chr17_57170885_57171021:mpeak_40	chr17:57059999_57184266_TRIM37_NM_-	-	chr17:57168701_57181653:NM_001353086_intron_20_0_chr17_57168702_r	chr17	57173950	57175000	mpeak:73091	chr17:57059999-57184266-TRIM37	-
chr17	57170885	57181653	chr17_57170885_57171021:mpeak_40	chr17:57059999_57184266_TRIM37_NM_-	-	chr17:57168701_57181653:NM_001353086_intron_20_0_chr17_57168702_r	chr17	57175050	57175750	mpeak:73092	chr17:57059999-57184266-TRIM37	-
chr17	57170885	57181653	chr17_57170885_57171021:mpeak_40	chr17:57059999_57184266_TRIM37_NM_-	-	chr17:57168701_57181653:NM_001353086_intron_20_0_chr17_57168702_r	chr17	57177250	57178100	mpeak:73096	chr17:57059999-57184266-TRIM37	-
chr17	57170885	57181653	chr17_57170885_57171021:mpeak_40	chr17:57059999_57184266_TRIM37_NM_-	-	chr17:57168701_57181653:NM_001353086_intron_20_0_chr17_57168702_r	chr17	57178300	57179000	mpeak:73097	chr17:57059999-57184266-TRIM37	-
chr17	57170885	57181653	chr17_57170885_57171021:mpeak_40	chr17:57059999_57184266_TRIM37_NM_-	-	chr17:57168701_57181653:NM_001353086_intron_20_0_chr17_57168702_r	chr17	57181250	57181650	mpeak:73101	chr17:57059999-57184266-TRIM37	-
chr17	57170885	57181653	chr17_57170885_57171021:mpeak_40	chr17:57059999_57184266_TRIM37_NM_-	-	chr17:57168701_57181653:NM_015294_intron_21_0_chr17_57168702_r	chr17	57170850	57171200	mpeak:73086	chr17:57059999-57184266-TRIM37	-
chr17	57170885	57181653	chr17_57170885_57171021:mpeak_40	chr17:57059999_57184266_TRIM37_NM_-	-	chr17:57168701_57181653:NM_015294_intron_21_0_chr17_57168702_r	chr17	57171450	57173250	mpeak:73088	chr17:57059999-57184266-TRIM37	-
chr17	57170885	57181653	chr17_57170885_57171021:mpeak_40	chr17:57059999_57184266_TRIM37_NM_-	-	chr17:57168701_57181653:NM_015294_intron_21_0_chr17_57168702_r	chr17	57173300	57173650	mpeak:73089	chr17:57059999-57184266-TRIM37	-
chr17	57170885	57181653	chr17_57170885_57171021:mpeak_40	chr17:57059999_57184266_TRIM37_NM_-	-	chr17:57168701_57181653:NM_015294_intron_21_0_chr17_57168702_r	chr17	57173950	57175000	mpeak:73091	chr17:57059999-57184266-TRIM37	-
chr17	57170885	57181653	chr17_57170885_57171021:mpeak_40	chr17:57059999_57184266_TRIM37_NM_-	-	chr17:57168701_57181653:NM_015294_intron_21_0_chr17_57168702_r	chr17	57175050	57175750	mpeak:73092	chr17:57059999-57184266-TRIM37	-
chr17	57170885	57181653	chr17_57170885_57171021:mpeak_40	chr17:57059999_57184266_TRIM37_NM_-	-	chr17:57168701_57181653:NM_015294_intron_21_0_chr17_57168702_r	chr17	57177250	57178100	mpeak:73096	chr17:57059999-57184266-TRIM37	-
chr17	57170885	57181653	chr17_57170885_57171021:mpeak_40	chr17:57059999_57184266_TRIM37_NM_-	-	chr17:57168701_57181653:NM_015294_intron_21_0_chr17_57168702_r	chr17	57178300	57179000	mpeak:73097	chr17:57059999-57184266-TRIM37	-
chr17	57170885	57181653	chr17_57170885_57171021:mpeak_40	chr17:57059999_57184266_TRIM37_NM_-	-	chr17:57168701_57181653:NM_015294_intron_21_0_chr17_57168702_r	chr17	57181250	57181650	mpeak:73101	chr17:57059999-57184266-TRIM37	-
chr17	57170885	57181653	chr17_57170885_57171021:mpeak_40	chr17:57059999_57184266_TRIM37_NM_-	-	chr17:57168701_57181653:NR_148346_intron_21_0_chr17_57168702_r	chr17	57170850	57171200	mpeak:73086	chr17:57059999-57184266-TRIM37	-
chr17	57170885	57181653	chr17_57170885_57171021:mpeak_40	chr17:57059999_57184266_TRIM37_NM_-	-	chr17:57168701_57181653:NR_148346_intron_21_0_chr17_57168702_r	chr17	57171450	57173250	mpeak:73088	chr17:57059999-57184266-TRIM37	-
chr17	57170885	57181653	chr17_57170885_57171021:mpeak_40	chr17:57059999_57184266_TRIM37_NM_-	-	chr17:57168701_57181653:NR_148346_intron_21_0_chr17_57168702_r	chr17	57173300	57173650	mpeak:73089	chr17:57059999-57184266-TRIM37	-
chr17	57170885	57181653	chr17_57170885_57171021:mpeak_40	chr17:57059999_57184266_TRIM37_NM_-	-	chr17:57168701_57181653:NR_148346_intron_21_0_chr17_57168702_r	chr17	57173950	57175000	mpeak:73091	chr17:57059999-57184266-TRIM37	-
chr17	57170885	57181653	chr17_57170885_57171021:mpeak_40	chr17:57059999_57184266_TRIM37_NM_-	-	chr17:57168701_57181653:NR_148346_intron_21_0_chr17_57168702_r	chr17	57175050	57175750	mpeak:73092	chr17:57059999-57184266-TRIM37	-
chr17	57170885	57181653	chr17_57170885_57171021:mpeak_40	chr17:57059999_57184266_TRIM37_NM_-	-	chr17:57168701_57181653:NR_148346_intron_21_0_chr17_57168702_r	chr17	57177250	57178100	mpeak:73096	chr17:57059999-57184266-TRIM37	-
chr17	57170885	57181653	chr17_57170885_57171021:mpeak_40	chr17:57059999_57184266_TRIM37_NM_-	-	chr17:57168701_57181653:NR_148346_intron_21_0_chr17_57168702_r	chr17	57178300	57179000	mpeak:73097	chr17:57059999-57184266-TRIM37	-
chr17	57170885	57181653	chr17_57170885_57171021:mpeak_40	chr17:57059999_57184266_TRIM37_NM_-	-	chr17:57168701_57181653:NR_148346_intron_21_0_chr17_57168702_r	chr17	57181250	57181650	mpeak:73101	chr17:57059999-57184266-TRIM37	-
chr17	57170885	57183801	chr17_57170885_57171021:mpeak_40	chr17:57059999_57184266_TRIM37_NM_-	-	chr17:57168701_57183801:NR_148347_intron_21_0_chr17_57168702_r	chr17	57170850	57171200	mpeak:73086	chr17:57059999-57184266-TRIM37	-
chr17	57170885	57183801	chr17_57170885_57171021:mpeak_40	chr17:57059999_57184266_TRIM37_NM_-	-	chr17:57168701_57183801:NR_148347_intron_21_0_chr17_57168702_r	chr17	57171450	57173250	mpeak:73088	chr17:57059999-57184266-TRIM37	-
chr17	57170885	57183801	chr17_57170885_57171021:mpeak_40	chr17:57059999_57184266_TRIM37_NM_-	-	chr17:57168701_57183801:NR_148347_intron_21_0_chr17_57168702_r	chr17	57173300	57173650	mpeak:73089	chr17:57059999-57184266-TRIM37	-
chr17	57170885	57183801	chr17_57170885_57171021:mpeak_40	chr17:57059999_57184266_TRIM37_NM_-	-	chr17:57168701_57183801:NR_148347_intron_21_0_chr17_57168702_r	chr17	57173950	57175000	mpeak:73091	chr17:57059999-57184266-TRIM37	-
chr17	57170885	57183801	chr17_57170885_57171021:mpeak_40	chr17:57059999_57184266_TRIM37_NM_-	-	chr17:57168701_57183801:NR_148347_intron_21_0_chr17_57168702_r	chr17	57175050	57175750	mpeak:73092	chr17:57059999-57184266-TRIM37	-
chr17	57170885	57183801	chr17_57170885_57171021:mpeak_40	chr17:57059999_57184266_TRIM37_NM_-	-	chr17:57168701_57183801:NR_148347_intron_21_0_chr17_57168702_r	chr17	57177250	57178100	mpeak:73096	chr17:57059999-57184266-TRIM37	-
chr17	57170885	57183801	chr17_57170885_57171021:mpeak_40	chr17:57059999_57184266_TRIM37_NM_-	-	chr17:57168701_57183801:NR_148347_intron_21_0_chr17_57168702_r	chr17	57178300	57179000	mpeak:73097	chr17:57059999-57184266-TRIM37	-
chr17	57170885	57183801	chr17_57170885_57171021:mpeak_40	chr17:57059999_57184266_TRIM37_NM_-	-	chr17:57168701_57183801:NR_148347_intron_21_0_chr17_57168702_r	chr17	57181250	57181650	mpeak:73101	chr17:57059999-57184266-TRIM37	-
chr19	39335164	39336287	chr19_39335164_39335420:mpeak_44	chr19:39327027_39342979_HNRNPL_NM_-	-	chr19:39334742_39336287:NM_001533_intron_8_0_chr19_39334743_r	chr19	39334850	39335400	mpeak:82968	chr19:39327027-39342979-HNRNPL	-
chr19	39335164	39336287	chr19_39335164_39335420:mpeak_44	chr19:39327027_39342979_HNRNPL_NM_-	-	chr19:39334742_39336287:NM_001533_intron_8_0_chr19_39334743_r	chr19	39335950	39336250	mpeak:82970	chr19:39327027-39342979-HNRNPL	-
chr19	39335164	39336287	chr19_39335164_39335420:mpeak_44	chr19:39327027_39342979_HNRNPL_NM_-	-	chr19:39334742_39336287:NM_001005335_intron_8_0_chr19_39334743_r	chr19	39334850	39335400	mpeak:82968	chr19:39327027-39342979-HNRNPL	-
chr19	39335164	39336287	chr19_39335164_39335420:mpeak_44	chr19:39327027_39342979_HNRNPL_NM_-	-	chr19:39334742_39336287:NM_001005335_intron_8_0_chr19_39334743_r	chr19	39335950	39336250	mpeak:82970	chr19:39327027-39342979-HNRNPL	-
chr20	44700752	44708025	chr20_44700752_44700930:mpeak_59	chr20:44689625_44718580_NCOA5_NM_-	-	chr20:44699175_44708025:NM_020967_intron_5_0_chr20_44699176_r	chr20	44702750	44702800	mpeak:100619	chr20:44689625-44718580-NCOA5	-
chr20	44700752	44708025	chr20_44700752_44700930:mpeak_59	chr20:44689625_44718580_NCOA5_NM_-	-	chr20:44699175_44708025:NM_001348149_intron_5_0_chr20_44699176_r	chr20	44702750	44702800	mpeak:100619	chr20:44689625-44718580-NCOA5	-
chr20	44700752	44708025	chr20_44700752_44700930:mpeak_59	chr20:44689625_44718580_NCOA5_NM_-	-	chr20:44699175_44708025:NM_001348150_intron_6_0_chr20_44699176_r	chr20	44702750	44702800	mpeak:100619	chr20:44689625-44718580-NCOA5	-
chr20	44700752	44718455	chr20_44700752_44700930:mpeak_59	chr20:44689625_44718580_NCOA5_NM_-	-	chr20:44699175_44718455:NM_001348148_intron_5_0_chr20_44699176_r	chr20	44702750	44702800	mpeak:100619	chr20:44689625-44718580-NCOA5	-
chr20	44700752	44718455	chr20_44700752_44700930:mpeak_59	chr20:44689625_44718580_NCOA5_NM_-	-	chr20:44699175_44718455:NM_001348148_intron_5_0_chr20_44699176_r	chr20	44708450	44708500	mpeak:100620	chr20:44689625-44718580-NCOA5	-
chr20	44700752	44718455	chr20_44700752_44700930:mpeak_59	chr20:44689625_44718580_NCOA5_NM_-	-	chr20:44699175_44718455:NM_001348148_intron_5_0_chr20_44699176_r	chr20	44708800	44709200	mpeak:100621	chr20:44689625-44718580-NCOA5	-
chr20	44700752	44718455	chr20_44700752_44700930:mpeak_59	chr20:44689625_44718580_NCOA5_NM_-	-	chr20:44699175_44718455:NM_001348148_intron_5_0_chr20_44699176_r	chr20	44709300	44709350	mpeak:100622	chr20:44689625-44718580-NCOA5	-
chr20	44700752	44718455	chr20_44700752_44700930:mpeak_59	chr20:44689625_44718580_NCOA5_NM_-	-	chr20:44699175_44718455:NM_001348148_intron_5_0_chr20_44699176_r	chr20	44714000	44714200	mpeak:100631	chr20:44689625-44718580-NCOA5	-
chr20	44700752	44718455	chr20_44700752_44700930:mpeak_59	chr20:44689625_44718580_NCOA5_NM_-	-	chr20:44699175_44718455:NM_001348148_intron_5_0_chr20_44699176_r	chr20	44714250	44714350	mpeak:100632	chr20:44689625-44718580-NCOA5	-
chr20	44700752	44718455	chr20_44700752_44700930:mpeak_59	chr20:44689625_44718580_NCOA5_NM_-	-	chr20:44699175_44718455:NM_001348151_intron_5_0_chr20_44699176_r	chr20	44702750	44702800	mpeak:100619	chr20:44689625-44718580-NCOA5	-
chr20	44700752	44718455	chr20_44700752_44700930:mpeak_59	chr20:44689625_44718580_NCOA5_NM_-	-	chr20:44699175_44718455:NM_001348151_intron_5_0_chr20_44699176_r	chr20	44708450	44708500	mpeak:100620	chr20:44689625-44718580-NCOA5	-
chr20	44700752	44718455	chr20_44700752_44700930:mpeak_59	chr20:44689625_44718580_NCOA5_NM_-	-	chr20:44699175_44718455:NM_001348151_intron_5_0_chr20_44699176_r	chr20	44708800	44709200	mpeak:100621	chr20:44689625-44718580-NCOA5	-
chr20	44700752	44718455	chr20_44700752_44700930:mpeak_59	chr20:44689625_44718580_NCOA5_NM_-	-	chr20:44699175_44718455:NM_001348151_intron_5_0_chr20_44699176_r	chr20	44709300	44709350	mpeak:100622	chr20:44689625-44718580-NCOA5	-
chr20	44700752	44718455	chr20_44700752_44700930:mpeak_59	chr20:44689625_44718580_NCOA5_NM_-	-	chr20:44699175_44718455:NM_001348151_intron_5_0_chr20_44699176_r	chr20	44714000	44714200	mpeak:100631	chr20:44689625-44718580-NCOA5	-
chr20	44700752	44718455	chr20_44700752_44700930:mpeak_59	chr20:44689625_44718580_NCOA5_NM_-	-	chr20:44699175_44718455:NM_001348151_intron_5_0_chr20_44699176_r	chr20	44714250	44714350	mpeak:100632	chr20:44689625-44718580-NCOA5	-
chr20	47538547	47549178	chr20_47549126_47549178:mpeak_60	chr20:47538274_47653230_ARFGEF2_NM_+	+	chr20:47538547_47557735:NM_006420_intron_0_0_chr20_47538548_f	chr20	47538800	47539150	mpeak:101467	chr20:47538274-47653230-ARFGEF2	+
chr20	47538547	47549178	chr20_47549126_47549178:mpeak_60	chr20:47538274_47653230_ARFGEF2_NM_+	+	chr20:47538547_47557735:NM_006420_intron_0_0_chr20_47538548_f	chr20	47547750	47547850	mpeak:101474	chr20:47538274-47653230-ARFGEF2	+
chr20	47897501	47900232	chr20_47900106_47900232:mpeak_61	chr20:47894714_47905795_ZFAS1_NR_+	+	chr20:47897501_47905581:NR_003604_intron_3_0_chr20_47897502_f	chr20	47897900	47898050	mpeak:101552	chr20:47894714-47905795-ZFAS1	+
chr20	47897501	47900232	chr20_47900106_47900232:mpeak_61	chr20:47894714_47905795_ZFAS1_NR_+	+	chr20:47897501_47905581:NR_003605_intron_3_0_chr20_47897502_f	chr20	47897900	47898050	mpeak:101552	chr20:47894714-47905795-ZFAS1	+
chr20	47897107	47900232	chr20_47900106_47900232:mpeak_61	chr20:47894714_47905795_ZFAS1_NR_+	+	chr20:47897107_47905581:NR_036659_intron_2_0_chr20_47897108_f	chr20	47897900	47898050	mpeak:101552	chr20:47894714-47905795-ZFAS1	+
chr20	47895745	47900232	chr20_47900106_47900232:mpeak_61	chr20:47894714_47905795_ZFAS1_NR_+	+	chr20:47895745_47905581:NR_003606_intron_1_0_chr20_47895746_f	chr20	47897900	47898050	mpeak:101552	chr20:47894714-47905795-ZFAS1	+
chr20	47897107	47900232	chr20_47900106_47900232:mpeak_61	chr20:47894714_47905795_ZFAS1_NR_+	+	chr20:47897107_47905581:NR_036658_intron_2_0_chr20_47897108_f	chr20	47897900	47898050	mpeak:101552	chr20:47894714-47905795-ZFAS1	+
chr2	11729057	11731253	chr2_11731061_11731253:mpeak_50	chr2:11674241_11782912_GREB1_NM_+	+	chr2:11729057_11732901:NM_014668_intron_9_0_chr2_11729058_f	chr2	11729400	11729550	mpeak:84554	chr2:11674241-11782912-GREB1	+
chr2	11729057	11731253	chr2_11731061_11731253:mpeak_50	chr2:11674241_11782912_GREB1_NM_+	+	chr2:11729057_11732901:NM_014668_intron_9_0_chr2_11729058_f	chr2	11730400	11730950	mpeak:84559	chr2:11674241-11782912-GREB1	+
chr2	11729057	11731253	chr2_11731061_11731253:mpeak_50	chr2:11674241_11782912_GREB1_NM_+	+	chr2:11729057_11731521:NM_033090_intron_9_0_chr2_11729058_f	chr2	11729400	11729550	mpeak:84554	chr2:11674241-11782912-GREB1	+
chr2	11729057	11731253	chr2_11731061_11731253:mpeak_50	chr2:11674241_11782912_GREB1_NM_+	+	chr2:11729057_11731521:NM_033090_intron_9_0_chr2_11729058_f	chr2	11730400	11730950	mpeak:84559	chr2:11674241-11782912-GREB1	+
chr2	216865653	216877955	chr2_216865653_216865913:mpeak_56	chr2:216807313_216878346_MREG_NM_-	-	chr2:216861188_216877955:NM_018000_intron_3_0_chr2_216861189_r	chr2	216868800	216868950	mpeak:96984	chr2:216807313-216878346-MREG	-
chr2	216865653	216877955	chr2_216865653_216865913:mpeak_56	chr2:216807313_216878346_MREG_NM_-	-	chr2:216861188_216877955:NM_018000_intron_3_0_chr2_216861189_r	chr2	216869050	216869300	mpeak:96985	chr2:216807313-216878346-MREG	-
chr22	40982323	40990677	chr22_40982323_40982383:mpeak_65	chr22:40806284_41032723_MKL1_NM_-	-	chr22:40948371_40990677:NM_001282661_intron_11_0_chr22_40948372_r	chr22	40988150	40988250	mpeak:106819	chr22:40806284-41032723-MKL1	-
chr22	40982323	40990677	chr22_40982323_40982383:mpeak_65	chr22:40806284_41032723_MKL1_NM_-	-	chr22:40948371_40990677:NM_001282661_intron_11_0_chr22_40948372_r	chr22	40989050	40989250	mpeak:106821	chr22:40806284-41032723-MKL1	-
chr22	40982323	40990677	chr22_40982323_40982383:mpeak_65	chr22:40806284_41032723_MKL1_NM_-	-	chr22:40948371_40990677:NM_001282662_intron_12_0_chr22_40948372_r	chr22	40988150	40988250	mpeak:106819	chr22:40806284-41032723-MKL1	-
chr22	40982323	40990677	chr22_40982323_40982383:mpeak_65	chr22:40806284_41032723_MKL1_NM_-	-	chr22:40948371_40990677:NM_001282662_intron_12_0_chr22_40948372_r	chr22	40989050	40989250	mpeak:106821	chr22:40806284-41032723-MKL1	-
chr22	40982323	40990677	chr22_40982323_40982383:mpeak_65	chr22:40806284_41032723_MKL1_NM_-	-	chr22:40948371_40990677:NM_020831_intron_12_0_chr22_40948372_r	chr22	40988150	40988250	mpeak:106819	chr22:40806284-41032723-MKL1	-
chr22	40982323	40990677	chr22_40982323_40982383:mpeak_65	chr22:40806284_41032723_MKL1_NM_-	-	chr22:40948371_40990677:NM_020831_intron_12_0_chr22_40948372_r	chr22	40989050	40989250	mpeak:106821	chr22:40806284-41032723-MKL1	-
chr22	50781979	50806014	chr22_50805958_50806014:mpeak_67	chr22:50781745_50883518_PPP6R2_NM_+	+	chr22:50781979_50810448:NM_014678_intron_0_0_chr22_50781980_f	chr22	50804350	50804450	mpeak:107227	chr22:50781745-50883518-PPP6R2	+
chr22	50781979	50806014	chr22_50805958_50806014:mpeak_67	chr22:50781745_50883518_PPP6R2_NM_+	+	chr22:50781979_50810448:NM_001242900_intron_0_0_chr22_50781980_f	chr22	50804350	50804450	mpeak:107227	chr22:50781745-50883518-PPP6R2	+
chr22	50781979	50806014	chr22_50805958_50806014:mpeak_67	chr22:50781745_50883518_PPP6R2_NM_+	+	chr22:50781979_50810448:NM_001242898_intron_0_0_chr22_50781980_f	chr22	50804350	50804450	mpeak:107227	chr22:50781745-50883518-PPP6R2	+
chr22	50781979	50806014	chr22_50805958_50806014:mpeak_67	chr22:50781745_50883518_PPP6R2_NM_+	+	chr22:50781979_50810448:NM_001242899_intron_0_0_chr22_50781980_f	chr22	50804350	50804450	mpeak:107227	chr22:50781745-50883518-PPP6R2	+
chr22	50781979	50806014	chr22_50805958_50806014:mpeak_67	chr22:50781745_50883518_PPP6R2_NM_+	+	chr22:50781979_50810448:NM_001351643_intron_0_0_chr22_50781980_f	chr22	50804350	50804450	mpeak:107227	chr22:50781745-50883518-PPP6R2	+
chr22	50781979	50806014	chr22_50805958_50806014:mpeak_67	chr22:50781745_50883518_PPP6R2_NM_+	+	chr22:50781979_50810448:NM_001351641_intron_0_0_chr22_50781980_f	chr22	50804350	50804450	mpeak:107227	chr22:50781745-50883518-PPP6R2	+
chr22	50781979	50806014	chr22_50805958_50806014:mpeak_67	chr22:50781745_50883518_PPP6R2_NM_+	+	chr22:50781979_50810448:NM_001351642_intron_0_0_chr22_50781980_f	chr22	50804350	50804450	mpeak:107227	chr22:50781745-50883518-PPP6R2	+
chr22	50781979	50806014	chr22_50805958_50806014:mpeak_67	chr22:50781745_50883518_PPP6R2_NM_+	+	chr22:50781979_50810448:NM_001351644_intron_0_0_chr22_50781980_f	chr22	50804350	50804450	mpeak:107227	chr22:50781745-50883518-PPP6R2	+
chr22	50781979	50806014	chr22_50805958_50806014:mpeak_67	chr22:50781745_50883518_PPP6R2_NM_+	+	chr22:50781979_50810448:NM_001351645_intron_0_0_chr22_50781980_f	chr22	50804350	50804450	mpeak:107227	chr22:50781745-50883518-PPP6R2	+
chr22	50781979	50806014	chr22_50805958_50806014:mpeak_67	chr22:50781745_50883518_PPP6R2_NM_+	+	chr22:50781979_50810448:NM_001351646_intron_0_0_chr22_50781980_f	chr22	50804350	50804450	mpeak:107227	chr22:50781745-50883518-PPP6R2	+
chr22	50781979	50806014	chr22_50805958_50806014:mpeak_67	chr22:50781745_50883518_PPP6R2_NM_+	+	chr22:50781979_50810448:NM_001351647_intron_0_0_chr22_50781980_f	chr22	50804350	50804450	mpeak:107227	chr22:50781745-50883518-PPP6R2	+
chr22	50781979	50806014	chr22_50805958_50806014:mpeak_67	chr22:50781745_50883518_PPP6R2_NM_+	+	chr22:50781979_50810448:NM_001351648_intron_0_0_chr22_50781980_f	chr22	50804350	50804450	mpeak:107227	chr22:50781745-50883518-PPP6R2	+
chr3	183701528	183705557	chr3_183701528_183701593:mpeak_74	chr3:183637723_183735727_ABCC5_NM_-	-	chr3:183700795_183705557:NM_001320032_intron_24_0_chr3_183700796_r	chr3	183701400	183702500	mpeak:120824	chr3:183637723-183735727-ABCC5	-
chr3	183701528	183705557	chr3_183701528_183701593:mpeak_74	chr3:183637723_183735727_ABCC5_NM_-	-	chr3:183700795_183705557:NM_005688_intron_24_0_chr3_183700796_r	chr3	183701400	183702500	mpeak:120824	chr3:183637723-183735727-ABCC5	-
chr3	185649362	185655612	chr3_185649362_185649480:mpeak_75	chr3:185632357_185655924_TRA2B_NM_-	-	chr3:185644522_185655612:NM_004593_intron_7_0_chr3_185644523_r	chr3	185649600	185649800	mpeak:120982	chr3:185632357-185655924-TRA2B	-
chr3	185649362	185655612	chr3_185649362_185649480:mpeak_75	chr3:185632357_185655924_TRA2B_NM_-	-	chr3:185644522_185655612:NM_004593_intron_7_0_chr3_185644523_r	chr3	185650350	185650550	mpeak:120985	chr3:185632357-185655924-TRA2B	-
chr3	185649362	185655612	chr3_185649362_185649480:mpeak_75	chr3:185632357_185655924_TRA2B_NM_-	-	chr3:185643414_185655612:NM_001243879_intron_6_0_chr3_185643415_r	chr3	185649600	185649800	mpeak:120982	chr3:185632357-185655924-TRA2B	-
chr3	185649362	185655612	chr3_185649362_185649480:mpeak_75	chr3:185632357_185655924_TRA2B_NM_-	-	chr3:185643414_185655612:NM_001243879_intron_6_0_chr3_185643415_r	chr3	185650350	185650550	mpeak:120985	chr3:185632357-185655924-TRA2B	-
chr4	143296197	143324090	chr4_143296197_143296265:mpeak_81	chr4:142949181_143767604_INPP4B_NM_-	-	chr4:143235915_143324090:NM_001101669_intron_18_0_chr4_143235916_r	chr4	143298400	143298550	mpeak:130015	chr4:142949181-143767604-INPP4B	-
chr4	143296197	143324090	chr4_143296197_143296265:mpeak_81	chr4:142949181_143767604_INPP4B_NM_-	-	chr4:143235915_143324090:NM_001101669_intron_18_0_chr4_143235916_r	chr4	143301900	143302000	mpeak:130029	chr4:142949181-143767604-INPP4B	-
chr4	143296197	143324090	chr4_143296197_143296265:mpeak_81	chr4:142949181_143767604_INPP4B_NM_-	-	chr4:143235915_143324090:NM_001101669_intron_18_0_chr4_143235916_r	chr4	143303100	143303200	mpeak:130034	chr4:142949181-143767604-INPP4B	-
chr4	143296197	143324090	chr4_143296197_143296265:mpeak_81	chr4:142949181_143767604_INPP4B_NM_-	-	chr4:143235915_143324090:NM_001101669_intron_18_0_chr4_143235916_r	chr4	143303850	143304050	mpeak:130036	chr4:142949181-143767604-INPP4B	-
chr4	143296197	143324090	chr4_143296197_143296265:mpeak_81	chr4:142949181_143767604_INPP4B_NM_-	-	chr4:143235915_143324090:NM_001101669_intron_18_0_chr4_143235916_r	chr4	143304300	143305050	mpeak:130038	chr4:142949181-143767604-INPP4B	-
chr4	143296197	143324090	chr4_143296197_143296265:mpeak_81	chr4:142949181_143767604_INPP4B_NM_-	-	chr4:143235915_143324090:NM_001101669_intron_18_0_chr4_143235916_r	chr4	143306450	143306600	mpeak:130043	chr4:142949181-143767604-INPP4B	-
chr4	143296197	143324090	chr4_143296197_143296265:mpeak_81	chr4:142949181_143767604_INPP4B_NM_-	-	chr4:143235915_143324090:NM_001101669_intron_18_0_chr4_143235916_r	chr4	143306750	143307050	mpeak:130045	chr4:142949181-143767604-INPP4B	-
chr4	143296197	143324090	chr4_143296197_143296265:mpeak_81	chr4:142949181_143767604_INPP4B_NM_-	-	chr4:143235915_143324090:NM_001101669_intron_18_0_chr4_143235916_r	chr4	143308500	143308650	mpeak:130049	chr4:142949181-143767604-INPP4B	-
chr4	143296197	143324090	chr4_143296197_143296265:mpeak_81	chr4:142949181_143767604_INPP4B_NM_-	-	chr4:143235915_143324090:NM_001101669_intron_18_0_chr4_143235916_r	chr4	143309600	143310000	mpeak:130051	chr4:142949181-143767604-INPP4B	-
chr4	143296197	143324090	chr4_143296197_143296265:mpeak_81	chr4:142949181_143767604_INPP4B_NM_-	-	chr4:143235915_143324090:NM_001101669_intron_18_0_chr4_143235916_r	chr4	143310450	143310650	mpeak:130053	chr4:142949181-143767604-INPP4B	-
chr4	143296197	143324090	chr4_143296197_143296265:mpeak_81	chr4:142949181_143767604_INPP4B_NM_-	-	chr4:143235915_143324090:NM_001101669_intron_18_0_chr4_143235916_r	chr4	143311650	143311900	mpeak:130057	chr4:142949181-143767604-INPP4B	-
chr4	143296197	143324090	chr4_143296197_143296265:mpeak_81	chr4:142949181_143767604_INPP4B_NM_-	-	chr4:143235915_143324090:NM_001101669_intron_18_0_chr4_143235916_r	chr4	143312100	143312250	mpeak:130058	chr4:142949181-143767604-INPP4B	-
chr4	143296197	143324090	chr4_143296197_143296265:mpeak_81	chr4:142949181_143767604_INPP4B_NM_-	-	chr4:143235915_143324090:NM_001101669_intron_18_0_chr4_143235916_r	chr4	143312450	143312600	mpeak:130059	chr4:142949181-143767604-INPP4B	-
chr4	143296197	143324090	chr4_143296197_143296265:mpeak_81	chr4:142949181_143767604_INPP4B_NM_-	-	chr4:143235915_143324090:NM_001101669_intron_18_0_chr4_143235916_r	chr4	143312650	143312900	mpeak:130060	chr4:142949181-143767604-INPP4B	-
chr4	143296197	143324090	chr4_143296197_143296265:mpeak_81	chr4:142949181_143767604_INPP4B_NM_-	-	chr4:143235915_143324090:NM_001101669_intron_18_0_chr4_143235916_r	chr4	143313200	143313450	mpeak:130062	chr4:142949181-143767604-INPP4B	-
chr4	143296197	143324090	chr4_143296197_143296265:mpeak_81	chr4:142949181_143767604_INPP4B_NM_-	-	chr4:143235915_143324090:NM_001101669_intron_18_0_chr4_143235916_r	chr4	143314050	143314500	mpeak:130064	chr4:142949181-143767604-INPP4B	-
chr4	143296197	143324090	chr4_143296197_143296265:mpeak_81	chr4:142949181_143767604_INPP4B_NM_-	-	chr4:143235915_143324090:NM_001101669_intron_18_0_chr4_143235916_r	chr4	143316100	143317150	mpeak:130065	chr4:142949181-143767604-INPP4B	-
chr4	143296197	143324090	chr4_143296197_143296265:mpeak_81	chr4:142949181_143767604_INPP4B_NM_-	-	chr4:143235915_143324090:NM_001101669_intron_18_0_chr4_143235916_r	chr4	143317200	143317450	mpeak:130066	chr4:142949181-143767604-INPP4B	-
chr4	143296197	143324090	chr4_143296197_143296265:mpeak_81	chr4:142949181_143767604_INPP4B_NM_-	-	chr4:143235915_143324090:NM_001101669_intron_18_0_chr4_143235916_r	chr4	143317500	143317750	mpeak:130067	chr4:142949181-143767604-INPP4B	-
chr4	143296197	143324090	chr4_143296197_143296265:mpeak_81	chr4:142949181_143767604_INPP4B_NM_-	-	chr4:143235915_143324090:NM_001101669_intron_18_0_chr4_143235916_r	chr4	143317800	143318000	mpeak:130068	chr4:142949181-143767604-INPP4B	-
chr4	143296197	143324090	chr4_143296197_143296265:mpeak_81	chr4:142949181_143767604_INPP4B_NM_-	-	chr4:143235915_143324090:NM_001101669_intron_18_0_chr4_143235916_r	chr4	143318050	143318150	mpeak:130069	chr4:142949181-143767604-INPP4B	-
chr4	143296197	143324090	chr4_143296197_143296265:mpeak_81	chr4:142949181_143767604_INPP4B_NM_-	-	chr4:143235915_143324090:NM_001101669_intron_18_0_chr4_143235916_r	chr4	143318200	143318550	mpeak:130070	chr4:142949181-143767604-INPP4B	-
chr4	143296197	143324090	chr4_143296197_143296265:mpeak_81	chr4:142949181_143767604_INPP4B_NM_-	-	chr4:143235915_143324090:NM_001101669_intron_18_0_chr4_143235916_r	chr4	143318950	143319250	mpeak:130071	chr4:142949181-143767604-INPP4B	-
chr4	143296197	143324090	chr4_143296197_143296265:mpeak_81	chr4:142949181_143767604_INPP4B_NM_-	-	chr4:143235915_143324090:NM_001101669_intron_18_0_chr4_143235916_r	chr4	143319600	143319850	mpeak:130072	chr4:142949181-143767604-INPP4B	-
chr4	143296197	143324090	chr4_143296197_143296265:mpeak_81	chr4:142949181_143767604_INPP4B_NM_-	-	chr4:143235915_143324090:NM_001101669_intron_18_0_chr4_143235916_r	chr4	143319900	143320200	mpeak:130073	chr4:142949181-143767604-INPP4B	-
chr4	143296197	143324090	chr4_143296197_143296265:mpeak_81	chr4:142949181_143767604_INPP4B_NM_-	-	chr4:143235915_143324090:NM_001101669_intron_18_0_chr4_143235916_r	chr4	143320900	143321000	mpeak:130075	chr4:142949181-143767604-INPP4B	-
chr4	143296197	143324090	chr4_143296197_143296265:mpeak_81	chr4:142949181_143767604_INPP4B_NM_-	-	chr4:143235915_143324090:NM_001101669_intron_18_0_chr4_143235916_r	chr4	143321050	143321400	mpeak:130076	chr4:142949181-143767604-INPP4B	-
chr4	143296197	143324090	chr4_143296197_143296265:mpeak_81	chr4:142949181_143767604_INPP4B_NM_-	-	chr4:143235915_143324090:NM_001101669_intron_18_0_chr4_143235916_r	chr4	143321450	143321850	mpeak:130077	chr4:142949181-143767604-INPP4B	-
chr4	143296197	143324090	chr4_143296197_143296265:mpeak_81	chr4:142949181_143767604_INPP4B_NM_-	-	chr4:143235915_143324090:NM_001101669_intron_18_0_chr4_143235916_r	chr4	143321950	143322550	mpeak:130078	chr4:142949181-143767604-INPP4B	-
chr4	143296197	143324090	chr4_143296197_143296265:mpeak_81	chr4:142949181_143767604_INPP4B_NM_-	-	chr4:143235915_143324090:NM_001101669_intron_18_0_chr4_143235916_r	chr4	143322600	143323150	mpeak:130079	chr4:142949181-143767604-INPP4B	-
chr4	143296197	143324090	chr4_143296197_143296265:mpeak_81	chr4:142949181_143767604_INPP4B_NM_-	-	chr4:143235915_143324090:NM_001101669_intron_18_0_chr4_143235916_r	chr4	143323200	143324050	mpeak:130080	chr4:142949181-143767604-INPP4B	-
chr4	143296197	143324090	chr4_143296197_143296265:mpeak_81	chr4:142949181_143767604_INPP4B_NM_-	-	chr4:143235915_143324090:NM_001101669_intron_18_0_chr4_143235916_r	chr4	143310700	143311250	mpeak:130054	chr4:142949181-143767604-INPP4B	-
chr4	143296197	143324090	chr4_143296197_143296265:mpeak_81	chr4:142949181_143767604_INPP4B_NM_-	-	chr4:143235915_143324090:NM_003866_intron_18_0_chr4_143235916_r	chr4	143298400	143298550	mpeak:130015	chr4:142949181-143767604-INPP4B	-
chr4	143296197	143324090	chr4_143296197_143296265:mpeak_81	chr4:142949181_143767604_INPP4B_NM_-	-	chr4:143235915_143324090:NM_003866_intron_18_0_chr4_143235916_r	chr4	143301900	143302000	mpeak:130029	chr4:142949181-143767604-INPP4B	-
chr4	143296197	143324090	chr4_143296197_143296265:mpeak_81	chr4:142949181_143767604_INPP4B_NM_-	-	chr4:143235915_143324090:NM_003866_intron_18_0_chr4_143235916_r	chr4	143303100	143303200	mpeak:130034	chr4:142949181-143767604-INPP4B	-
chr4	143296197	143324090	chr4_143296197_143296265:mpeak_81	chr4:142949181_143767604_INPP4B_NM_-	-	chr4:143235915_143324090:NM_003866_intron_18_0_chr4_143235916_r	chr4	143303850	143304050	mpeak:130036	chr4:142949181-143767604-INPP4B	-
chr4	143296197	143324090	chr4_143296197_143296265:mpeak_81	chr4:142949181_143767604_INPP4B_NM_-	-	chr4:143235915_143324090:NM_003866_intron_18_0_chr4_143235916_r	chr4	143304300	143305050	mpeak:130038	chr4:142949181-143767604-INPP4B	-
chr4	143296197	143324090	chr4_143296197_143296265:mpeak_81	chr4:142949181_143767604_INPP4B_NM_-	-	chr4:143235915_143324090:NM_003866_intron_18_0_chr4_143235916_r	chr4	143306450	143306600	mpeak:130043	chr4:142949181-143767604-INPP4B	-
chr4	143296197	143324090	chr4_143296197_143296265:mpeak_81	chr4:142949181_143767604_INPP4B_NM_-	-	chr4:143235915_143324090:NM_003866_intron_18_0_chr4_143235916_r	chr4	143306750	143307050	mpeak:130045	chr4:142949181-143767604-INPP4B	-
chr4	143296197	143324090	chr4_143296197_143296265:mpeak_81	chr4:142949181_143767604_INPP4B_NM_-	-	chr4:143235915_143324090:NM_003866_intron_18_0_chr4_143235916_r	chr4	143308500	143308650	mpeak:130049	chr4:142949181-143767604-INPP4B	-
chr4	143296197	143324090	chr4_143296197_143296265:mpeak_81	chr4:142949181_143767604_INPP4B_NM_-	-	chr4:143235915_143324090:NM_003866_intron_18_0_chr4_143235916_r	chr4	143309600	143310000	mpeak:130051	chr4:142949181-143767604-INPP4B	-
chr4	143296197	143324090	chr4_143296197_143296265:mpeak_81	chr4:142949181_143767604_INPP4B_NM_-	-	chr4:143235915_143324090:NM_003866_intron_18_0_chr4_143235916_r	chr4	143310450	143310650	mpeak:130053	chr4:142949181-143767604-INPP4B	-
chr4	143296197	143324090	chr4_143296197_143296265:mpeak_81	chr4:142949181_143767604_INPP4B_NM_-	-	chr4:143235915_143324090:NM_003866_intron_18_0_chr4_143235916_r	chr4	143311650	143311900	mpeak:130057	chr4:142949181-143767604-INPP4B	-
chr4	143296197	143324090	chr4_143296197_143296265:mpeak_81	chr4:142949181_143767604_INPP4B_NM_-	-	chr4:143235915_143324090:NM_003866_intron_18_0_chr4_143235916_r	chr4	143312100	143312250	mpeak:130058	chr4:142949181-143767604-INPP4B	-
chr4	143296197	143324090	chr4_143296197_143296265:mpeak_81	chr4:142949181_143767604_INPP4B_NM_-	-	chr4:143235915_143324090:NM_003866_intron_18_0_chr4_143235916_r	chr4	143312450	143312600	mpeak:130059	chr4:142949181-143767604-INPP4B	-
chr4	143296197	143324090	chr4_143296197_143296265:mpeak_81	chr4:142949181_143767604_INPP4B_NM_-	-	chr4:143235915_143324090:NM_003866_intron_18_0_chr4_143235916_r	chr4	143312650	143312900	mpeak:130060	chr4:142949181-143767604-INPP4B	-
chr4	143296197	143324090	chr4_143296197_143296265:mpeak_81	chr4:142949181_143767604_INPP4B_NM_-	-	chr4:143235915_143324090:NM_003866_intron_18_0_chr4_143235916_r	chr4	143313200	143313450	mpeak:130062	chr4:142949181-143767604-INPP4B	-
chr4	143296197	143324090	chr4_143296197_143296265:mpeak_81	chr4:142949181_143767604_INPP4B_NM_-	-	chr4:143235915_143324090:NM_003866_intron_18_0_chr4_143235916_r	chr4	143314050	143314500	mpeak:130064	chr4:142949181-143767604-INPP4B	-
chr4	143296197	143324090	chr4_143296197_143296265:mpeak_81	chr4:142949181_143767604_INPP4B_NM_-	-	chr4:143235915_143324090:NM_003866_intron_18_0_chr4_143235916_r	chr4	143316100	143317150	mpeak:130065	chr4:142949181-143767604-INPP4B	-
chr4	143296197	143324090	chr4_143296197_143296265:mpeak_81	chr4:142949181_143767604_INPP4B_NM_-	-	chr4:143235915_143324090:NM_003866_intron_18_0_chr4_143235916_r	chr4	143317200	143317450	mpeak:130066	chr4:142949181-143767604-INPP4B	-
chr4	143296197	143324090	chr4_143296197_143296265:mpeak_81	chr4:142949181_143767604_INPP4B_NM_-	-	chr4:143235915_143324090:NM_003866_intron_18_0_chr4_143235916_r	chr4	143317500	143317750	mpeak:130067	chr4:142949181-143767604-INPP4B	-
chr4	143296197	143324090	chr4_143296197_143296265:mpeak_81	chr4:142949181_143767604_INPP4B_NM_-	-	chr4:143235915_143324090:NM_003866_intron_18_0_chr4_143235916_r	chr4	143317800	143318000	mpeak:130068	chr4:142949181-143767604-INPP4B	-
chr4	143296197	143324090	chr4_143296197_143296265:mpeak_81	chr4:142949181_143767604_INPP4B_NM_-	-	chr4:143235915_143324090:NM_003866_intron_18_0_chr4_143235916_r	chr4	143318050	143318150	mpeak:130069	chr4:142949181-143767604-INPP4B	-
chr4	143296197	143324090	chr4_143296197_143296265:mpeak_81	chr4:142949181_143767604_INPP4B_NM_-	-	chr4:143235915_143324090:NM_003866_intron_18_0_chr4_143235916_r	chr4	143318200	143318550	mpeak:130070	chr4:142949181-143767604-INPP4B	-
chr4	143296197	143324090	chr4_143296197_143296265:mpeak_81	chr4:142949181_143767604_INPP4B_NM_-	-	chr4:143235915_143324090:NM_003866_intron_18_0_chr4_143235916_r	chr4	143318950	143319250	mpeak:130071	chr4:142949181-143767604-INPP4B	-
chr4	143296197	143324090	chr4_143296197_143296265:mpeak_81	chr4:142949181_143767604_INPP4B_NM_-	-	chr4:143235915_143324090:NM_003866_intron_18_0_chr4_143235916_r	chr4	143319600	143319850	mpeak:130072	chr4:142949181-143767604-INPP4B	-
chr4	143296197	143324090	chr4_143296197_143296265:mpeak_81	chr4:142949181_143767604_INPP4B_NM_-	-	chr4:143235915_143324090:NM_003866_intron_18_0_chr4_143235916_r	chr4	143319900	143320200	mpeak:130073	chr4:142949181-143767604-INPP4B	-
chr4	143296197	143324090	chr4_143296197_143296265:mpeak_81	chr4:142949181_143767604_INPP4B_NM_-	-	chr4:143235915_143324090:NM_003866_intron_18_0_chr4_143235916_r	chr4	143320900	143321000	mpeak:130075	chr4:142949181-143767604-INPP4B	-
chr4	143296197	143324090	chr4_143296197_143296265:mpeak_81	chr4:142949181_143767604_INPP4B_NM_-	-	chr4:143235915_143324090:NM_003866_intron_18_0_chr4_143235916_r	chr4	143321050	143321400	mpeak:130076	chr4:142949181-143767604-INPP4B	-
chr4	143296197	143324090	chr4_143296197_143296265:mpeak_81	chr4:142949181_143767604_INPP4B_NM_-	-	chr4:143235915_143324090:NM_003866_intron_18_0_chr4_143235916_r	chr4	143321450	143321850	mpeak:130077	chr4:142949181-143767604-INPP4B	-
chr4	143296197	143324090	chr4_143296197_143296265:mpeak_81	chr4:142949181_143767604_INPP4B_NM_-	-	chr4:143235915_143324090:NM_003866_intron_18_0_chr4_143235916_r	chr4	143321950	143322550	mpeak:130078	chr4:142949181-143767604-INPP4B	-
chr4	143296197	143324090	chr4_143296197_143296265:mpeak_81	chr4:142949181_143767604_INPP4B_NM_-	-	chr4:143235915_143324090:NM_003866_intron_18_0_chr4_143235916_r	chr4	143322600	143323150	mpeak:130079	chr4:142949181-143767604-INPP4B	-
chr4	143296197	143324090	chr4_143296197_143296265:mpeak_81	chr4:142949181_143767604_INPP4B_NM_-	-	chr4:143235915_143324090:NM_003866_intron_18_0_chr4_143235916_r	chr4	143323200	143324050	mpeak:130080	chr4:142949181-143767604-INPP4B	-
chr4	143296197	143324090	chr4_143296197_143296265:mpeak_81	chr4:142949181_143767604_INPP4B_NM_-	-	chr4:143235915_143324090:NM_003866_intron_18_0_chr4_143235916_r	chr4	143310700	143311250	mpeak:130054	chr4:142949181-143767604-INPP4B	-
chr4	143296197	143324090	chr4_143296197_143296265:mpeak_81	chr4:142949181_143767604_INPP4B_NM_-	-	chr4:143235915_143324090:NM_001331040_intron_18_0_chr4_143235916_r	chr4	143298400	143298550	mpeak:130015	chr4:142949181-143767604-INPP4B	-
chr4	143296197	143324090	chr4_143296197_143296265:mpeak_81	chr4:142949181_143767604_INPP4B_NM_-	-	chr4:143235915_143324090:NM_001331040_intron_18_0_chr4_143235916_r	chr4	143301900	143302000	mpeak:130029	chr4:142949181-143767604-INPP4B	-
chr4	143296197	143324090	chr4_143296197_143296265:mpeak_81	chr4:142949181_143767604_INPP4B_NM_-	-	chr4:143235915_143324090:NM_001331040_intron_18_0_chr4_143235916_r	chr4	143303100	143303200	mpeak:130034	chr4:142949181-143767604-INPP4B	-
chr4	143296197	143324090	chr4_143296197_143296265:mpeak_81	chr4:142949181_143767604_INPP4B_NM_-	-	chr4:143235915_143324090:NM_001331040_intron_18_0_chr4_143235916_r	chr4	143303850	143304050	mpeak:130036	chr4:142949181-143767604-INPP4B	-
chr4	143296197	143324090	chr4_143296197_143296265:mpeak_81	chr4:142949181_143767604_INPP4B_NM_-	-	chr4:143235915_143324090:NM_001331040_intron_18_0_chr4_143235916_r	chr4	143304300	143305050	mpeak:130038	chr4:142949181-143767604-INPP4B	-
chr4	143296197	143324090	chr4_143296197_143296265:mpeak_81	chr4:142949181_143767604_INPP4B_NM_-	-	chr4:143235915_143324090:NM_001331040_intron_18_0_chr4_143235916_r	chr4	143306450	143306600	mpeak:130043	chr4:142949181-143767604-INPP4B	-
chr4	143296197	143324090	chr4_143296197_143296265:mpeak_81	chr4:142949181_143767604_INPP4B_NM_-	-	chr4:143235915_143324090:NM_001331040_intron_18_0_chr4_143235916_r	chr4	143306750	143307050	mpeak:130045	chr4:142949181-143767604-INPP4B	-
chr4	143296197	143324090	chr4_143296197_143296265:mpeak_81	chr4:142949181_143767604_INPP4B_NM_-	-	chr4:143235915_143324090:NM_001331040_intron_18_0_chr4_143235916_r	chr4	143308500	143308650	mpeak:130049	chr4:142949181-143767604-INPP4B	-
chr4	143296197	143324090	chr4_143296197_143296265:mpeak_81	chr4:142949181_143767604_INPP4B_NM_-	-	chr4:143235915_143324090:NM_001331040_intron_18_0_chr4_143235916_r	chr4	143309600	143310000	mpeak:130051	chr4:142949181-143767604-INPP4B	-
chr4	143296197	143324090	chr4_143296197_143296265:mpeak_81	chr4:142949181_143767604_INPP4B_NM_-	-	chr4:143235915_143324090:NM_001331040_intron_18_0_chr4_143235916_r	chr4	143310450	143310650	mpeak:130053	chr4:142949181-143767604-INPP4B	-
chr4	143296197	143324090	chr4_143296197_143296265:mpeak_81	chr4:142949181_143767604_INPP4B_NM_-	-	chr4:143235915_143324090:NM_001331040_intron_18_0_chr4_143235916_r	chr4	143311650	143311900	mpeak:130057	chr4:142949181-143767604-INPP4B	-
chr4	143296197	143324090	chr4_143296197_143296265:mpeak_81	chr4:142949181_143767604_INPP4B_NM_-	-	chr4:143235915_143324090:NM_001331040_intron_18_0_chr4_143235916_r	chr4	143312100	143312250	mpeak:130058	chr4:142949181-143767604-INPP4B	-
chr4	143296197	143324090	chr4_143296197_143296265:mpeak_81	chr4:142949181_143767604_INPP4B_NM_-	-	chr4:143235915_143324090:NM_001331040_intron_18_0_chr4_143235916_r	chr4	143312450	143312600	mpeak:130059	chr4:142949181-143767604-INPP4B	-
chr4	143296197	143324090	chr4_143296197_143296265:mpeak_81	chr4:142949181_143767604_INPP4B_NM_-	-	chr4:143235915_143324090:NM_001331040_intron_18_0_chr4_143235916_r	chr4	143312650	143312900	mpeak:130060	chr4:142949181-143767604-INPP4B	-
chr4	143296197	143324090	chr4_143296197_143296265:mpeak_81	chr4:142949181_143767604_INPP4B_NM_-	-	chr4:143235915_143324090:NM_001331040_intron_18_0_chr4_143235916_r	chr4	143313200	143313450	mpeak:130062	chr4:142949181-143767604-INPP4B	-
chr4	143296197	143324090	chr4_143296197_143296265:mpeak_81	chr4:142949181_143767604_INPP4B_NM_-	-	chr4:143235915_143324090:NM_001331040_intron_18_0_chr4_143235916_r	chr4	143314050	143314500	mpeak:130064	chr4:142949181-143767604-INPP4B	-
chr4	143296197	143324090	chr4_143296197_143296265:mpeak_81	chr4:142949181_143767604_INPP4B_NM_-	-	chr4:143235915_143324090:NM_001331040_intron_18_0_chr4_143235916_r	chr4	143316100	143317150	mpeak:130065	chr4:142949181-143767604-INPP4B	-
chr4	143296197	143324090	chr4_143296197_143296265:mpeak_81	chr4:142949181_143767604_INPP4B_NM_-	-	chr4:143235915_143324090:NM_001331040_intron_18_0_chr4_143235916_r	chr4	143317200	143317450	mpeak:130066	chr4:142949181-143767604-INPP4B	-
chr4	143296197	143324090	chr4_143296197_143296265:mpeak_81	chr4:142949181_143767604_INPP4B_NM_-	-	chr4:143235915_143324090:NM_001331040_intron_18_0_chr4_143235916_r	chr4	143317500	143317750	mpeak:130067	chr4:142949181-143767604-INPP4B	-
chr4	143296197	143324090	chr4_143296197_143296265:mpeak_81	chr4:142949181_143767604_INPP4B_NM_-	-	chr4:143235915_143324090:NM_001331040_intron_18_0_chr4_143235916_r	chr4	143317800	143318000	mpeak:130068	chr4:142949181-143767604-INPP4B	-
chr4	143296197	143324090	chr4_143296197_143296265:mpeak_81	chr4:142949181_143767604_INPP4B_NM_-	-	chr4:143235915_143324090:NM_001331040_intron_18_0_chr4_143235916_r	chr4	143318050	143318150	mpeak:130069	chr4:142949181-143767604-INPP4B	-
chr4	143296197	143324090	chr4_143296197_143296265:mpeak_81	chr4:142949181_143767604_INPP4B_NM_-	-	chr4:143235915_143324090:NM_001331040_intron_18_0_chr4_143235916_r	chr4	143318200	143318550	mpeak:130070	chr4:142949181-143767604-INPP4B	-
chr4	143296197	143324090	chr4_143296197_143296265:mpeak_81	chr4:142949181_143767604_INPP4B_NM_-	-	chr4:143235915_143324090:NM_001331040_intron_18_0_chr4_143235916_r	chr4	143318950	143319250	mpeak:130071	chr4:142949181-143767604-INPP4B	-
chr4	143296197	143324090	chr4_143296197_143296265:mpeak_81	chr4:142949181_143767604_INPP4B_NM_-	-	chr4:143235915_143324090:NM_001331040_intron_18_0_chr4_143235916_r	chr4	143319600	143319850	mpeak:130072	chr4:142949181-143767604-INPP4B	-
chr4	143296197	143324090	chr4_143296197_143296265:mpeak_81	chr4:142949181_143767604_INPP4B_NM_-	-	chr4:143235915_143324090:NM_001331040_intron_18_0_chr4_143235916_r	chr4	143319900	143320200	mpeak:130073	chr4:142949181-143767604-INPP4B	-
chr4	143296197	143324090	chr4_143296197_143296265:mpeak_81	chr4:142949181_143767604_INPP4B_NM_-	-	chr4:143235915_143324090:NM_001331040_intron_18_0_chr4_143235916_r	chr4	143320900	143321000	mpeak:130075	chr4:142949181-143767604-INPP4B	-
chr4	143296197	143324090	chr4_143296197_143296265:mpeak_81	chr4:142949181_143767604_INPP4B_NM_-	-	chr4:143235915_143324090:NM_001331040_intron_18_0_chr4_143235916_r	chr4	143321050	143321400	mpeak:130076	chr4:142949181-143767604-INPP4B	-
chr4	143296197	143324090	chr4_143296197_143296265:mpeak_81	chr4:142949181_143767604_INPP4B_NM_-	-	chr4:143235915_143324090:NM_001331040_intron_18_0_chr4_143235916_r	chr4	143321450	143321850	mpeak:130077	chr4:142949181-143767604-INPP4B	-
chr4	143296197	143324090	chr4_143296197_143296265:mpeak_81	chr4:142949181_143767604_INPP4B_NM_-	-	chr4:143235915_143324090:NM_001331040_intron_18_0_chr4_143235916_r	chr4	143321950	143322550	mpeak:130078	chr4:142949181-143767604-INPP4B	-
chr4	143296197	143324090	chr4_143296197_143296265:mpeak_81	chr4:142949181_143767604_INPP4B_NM_-	-	chr4:143235915_143324090:NM_001331040_intron_18_0_chr4_143235916_r	chr4	143322600	143323150	mpeak:130079	chr4:142949181-143767604-INPP4B	-
chr4	143296197	143324090	chr4_143296197_143296265:mpeak_81	chr4:142949181_143767604_INPP4B_NM_-	-	chr4:143235915_143324090:NM_001331040_intron_18_0_chr4_143235916_r	chr4	143323200	143324050	mpeak:130080	chr4:142949181-143767604-INPP4B	-
chr4	143296197	143324090	chr4_143296197_143296265:mpeak_81	chr4:142949181_143767604_INPP4B_NM_-	-	chr4:143235915_143324090:NM_001331040_intron_18_0_chr4_143235916_r	chr4	143310700	143311250	mpeak:130054	chr4:142949181-143767604-INPP4B	-
chr6	151763322	151766442	chr6_151763322_151763381:mpeak_92	chr6:151725896_151773316_RMND1_NM_-	-	chr6:151757689_151766442:NM_017909_intron_9_0_chr6_151757690_r	chr6	151765050	151765200	mpeak:149784	chr6:151725896-151773316-RMND1	-
chr6	151763322	151766442	chr6_151763322_151763381:mpeak_92	chr6:151725896_151773316_RMND1_NM_-	-	chr6:151757689_151766442:NM_017909_intron_9_0_chr6_151757690_r	chr6	151765850	151766000	mpeak:149788	chr6:151725896-151773316-RMND1	-
chr6	151763322	151766442	chr6_151763322_151763381:mpeak_92	chr6:151725896_151773316_RMND1_NM_-	-	chr6:151757689_151766442:NM_017909_intron_9_0_chr6_151757690_r	chr6	151764750	151765000	mpeak:149783	chr6:151725896-151773316-RMND1	-
chr6	151763322	151773150	chr6_151763322_151763381:mpeak_92	chr6:151725896_151773316_RMND1_NM_-	-	chr6:151757689_151773150:NM_001271937_intron_9_0_chr6_151757690_r	chr6	151765050	151765200	mpeak:149784	chr6:151725896-151773316-RMND1	-
chr6	151763322	151773150	chr6_151763322_151763381:mpeak_92	chr6:151725896_151773316_RMND1_NM_-	-	chr6:151757689_151773150:NM_001271937_intron_9_0_chr6_151757690_r	chr6	151765850	151766000	mpeak:149788	chr6:151725896-151773316-RMND1	-
chr6	151763322	151773150	chr6_151763322_151763381:mpeak_92	chr6:151725896_151773316_RMND1_NM_-	-	chr6:151757689_151773150:NM_001271937_intron_9_0_chr6_151757690_r	chr6	151768600	151768750	mpeak:149792	chr6:151725896-151773316-RMND1	-
chr6	151763322	151773150	chr6_151763322_151763381:mpeak_92	chr6:151725896_151773316_RMND1_NM_-	-	chr6:151757689_151773150:NM_001271937_intron_9_0_chr6_151757690_r	chr6	151770100	151770200	mpeak:149794	chr6:151725896-151773316-RMND1	-
chr6	151763322	151773150	chr6_151763322_151763381:mpeak_92	chr6:151725896_151773316_RMND1_NM_-	-	chr6:151757689_151773150:NM_001271937_intron_9_0_chr6_151757690_r	chr6	151770450	151770550	mpeak:149795	chr6:151725896-151773316-RMND1	-
chr6	151763322	151773150	chr6_151763322_151763381:mpeak_92	chr6:151725896_151773316_RMND1_NM_-	-	chr6:151757689_151773150:NM_001271937_intron_9_0_chr6_151757690_r	chr6	151772350	151773000	mpeak:149796	chr6:151725896-151773316-RMND1	-
chr6	151763322	151773150	chr6_151763322_151763381:mpeak_92	chr6:151725896_151773316_RMND1_NM_-	-	chr6:151757689_151773150:NM_001271937_intron_9_0_chr6_151757690_r	chr6	151764750	151765000	mpeak:149783	chr6:151725896-151773316-RMND1	-
chr6	151763504	151766442	chr6_151763504_151763555:mpeak_93	chr6:151725896_151773316_RMND1_NM_-	-	chr6:151757689_151766442:NM_017909_intron_9_0_chr6_151757690_r	chr6	151765050	151765200	mpeak:149784	chr6:151725896-151773316-RMND1	-
chr6	151763504	151766442	chr6_151763504_151763555:mpeak_93	chr6:151725896_151773316_RMND1_NM_-	-	chr6:151757689_151766442:NM_017909_intron_9_0_chr6_151757690_r	chr6	151765850	151766000	mpeak:149788	chr6:151725896-151773316-RMND1	-
chr6	151763504	151766442	chr6_151763504_151763555:mpeak_93	chr6:151725896_151773316_RMND1_NM_-	-	chr6:151757689_151766442:NM_017909_intron_9_0_chr6_151757690_r	chr6	151764750	151765000	mpeak:149783	chr6:151725896-151773316-RMND1	-
chr6	151763504	151773150	chr6_151763504_151763555:mpeak_93	chr6:151725896_151773316_RMND1_NM_-	-	chr6:151757689_151773150:NM_001271937_intron_9_0_chr6_151757690_r	chr6	151765050	151765200	mpeak:149784	chr6:151725896-151773316-RMND1	-
chr6	151763504	151773150	chr6_151763504_151763555:mpeak_93	chr6:151725896_151773316_RMND1_NM_-	-	chr6:151757689_151773150:NM_001271937_intron_9_0_chr6_151757690_r	chr6	151765850	151766000	mpeak:149788	chr6:151725896-151773316-RMND1	-
chr6	151763504	151773150	chr6_151763504_151763555:mpeak_93	chr6:151725896_151773316_RMND1_NM_-	-	chr6:151757689_151773150:NM_001271937_intron_9_0_chr6_151757690_r	chr6	151768600	151768750	mpeak:149792	chr6:151725896-151773316-RMND1	-
chr6	151763504	151773150	chr6_151763504_151763555:mpeak_93	chr6:151725896_151773316_RMND1_NM_-	-	chr6:151757689_151773150:NM_001271937_intron_9_0_chr6_151757690_r	chr6	151770100	151770200	mpeak:149794	chr6:151725896-151773316-RMND1	-
chr6	151763504	151773150	chr6_151763504_151763555:mpeak_93	chr6:151725896_151773316_RMND1_NM_-	-	chr6:151757689_151773150:NM_001271937_intron_9_0_chr6_151757690_r	chr6	151770450	151770550	mpeak:149795	chr6:151725896-151773316-RMND1	-
chr6	151763504	151773150	chr6_151763504_151763555:mpeak_93	chr6:151725896_151773316_RMND1_NM_-	-	chr6:151757689_151773150:NM_001271937_intron_9_0_chr6_151757690_r	chr6	151772350	151773000	mpeak:149796	chr6:151725896-151773316-RMND1	-
chr6	151763504	151773150	chr6_151763504_151763555:mpeak_93	chr6:151725896_151773316_RMND1_NM_-	-	chr6:151757689_151773150:NM_001271937_intron_9_0_chr6_151757690_r	chr6	151764750	151765000	mpeak:149783	chr6:151725896-151773316-RMND1	-
chr8	104312512	104332774	chr8_104332604_104332774:mpeak_105	chr8:104310660_104345094_FZD6_NM_+	+	chr8:104312512_104337281:NM_001317796_intron_1_0_chr8_104312513_f	chr8	104314050	104314350	mpeak:165953	chr8:104310660-104345094-FZD6	+
chr8	104312512	104332774	chr8_104332604_104332774:mpeak_105	chr8:104310660_104345094_FZD6_NM_+	+	chr8:104312512_104337281:NM_001317796_intron_1_0_chr8_104312513_f	chr8	104315600	104316200	mpeak:165958	chr8:104310660-104345094-FZD6	+
chr8	104312512	104332774	chr8_104332604_104332774:mpeak_105	chr8:104310660_104345094_FZD6_NM_+	+	chr8:104312512_104337281:NM_001317796_intron_1_0_chr8_104312513_f	chr8	104319750	104320050	mpeak:165968	chr8:104310660-104345094-FZD6	+
chr8	104312512	104332774	chr8_104332604_104332774:mpeak_105	chr8:104310660_104345094_FZD6_NM_+	+	chr8:104312512_104337281:NM_001317796_intron_1_0_chr8_104312513_f	chr8	104328200	104328550	mpeak:165985	chr8:104310660-104345094-FZD6	+
