# Supplementary material for: Compartment-specific and ELAVL1-coordinated regulation of intronic polyadenylation isoforms by doxorubicin
Source: HighWire-hosted journal article supplement (doi:10.1101/gr.276192.121), 2022-07-01
Supplement: Supplemental_Table_S17.xlsx.xlsx [file Supplemental_Table_S17.xlsx.xlsx]

## Sheet: Feuil1
Supplemental Table S17 : List of IPA isoforms that are up-regulated by doxorubicin in the cytosol and have down-regulated ELAVL1 binding in the LE region in the cytosol.
chr_3seq	start_win	end_win	peak_3seq	gene_seq	strand_3seq	chr_iCLIP	start_iCLIP	end_iCLIP	peak_iCLIP	gene_iCLIP	strand_iCLIP
chr10	102721633	102724891	mpeak_162	chr10:102672325_102724891_FAM178A_NM_+	+	chr10	102723350	102723750	mpeak:4180	chr10:102672325-102724891-FAM178A	+
chr10	102721633	102724891	mpeak_162	chr10:102672325_102724891_FAM178A_NM_+	+	chr10	102723800	102723900	mpeak:4181	chr10:102672325-102724891-FAM178A	+
chr10	102721633	102724891	mpeak_162	chr10:102672325_102724891_FAM178A_NM_+	+	chr10	102724700	102724850	mpeak:4183	chr10:102672325-102724891-FAM178A	+
chr10	112052797	112054045	mpeak_165	chr10:112052797_112064707_SMNDC1_NM_-	-	chr10	112053100	112053500	mpeak:4267	chr10:112052797-112064707-SMNDC1	-
chr10	125767181	125769855	mpeak_169	chr10:125767181_125853123_CHST15_NM_-	-	chr10	125767500	125767650	mpeak:4496	chr10:125767181-125853123-CHST15	-
chr10	125767181	125769855	mpeak_169	chr10:125767181_125853123_CHST15_NM_-	-	chr10	125768550	125768700	mpeak:4498	chr10:125767181-125853123-CHST15	-
chr10	125767181	125769855	mpeak_169	chr10:125767181_125853123_CHST15_NM_-	-	chr10	125768750	125769100	mpeak:4499	chr10:125767181-125853123-CHST15	-
chr10	125767181	125769855	mpeak_170	chr10:125767181_125853123_CHST15_NM_-	-	chr10	125767500	125767650	mpeak:4496	chr10:125767181-125853123-CHST15	-
chr10	125767181	125769855	mpeak_170	chr10:125767181_125853123_CHST15_NM_-	-	chr10	125768550	125768700	mpeak:4498	chr10:125767181-125853123-CHST15	-
chr10	125767181	125769855	mpeak_170	chr10:125767181_125853123_CHST15_NM_-	-	chr10	125768750	125769100	mpeak:4499	chr10:125767181-125853123-CHST15	-
chr10	24834755	24836777	mpeak_123	chr10:23983674_24836777_KIAA1217_NM_+	+	chr10	24835850	24836150	mpeak:3504	chr10:23983674-24836777-KIAA1217	+
chr10	63850620	63856707	mpeak_143	chr10:63661012_63856707_ARID5B_NM_+	+	chr10	63853200	63853600	mpeak:3723	chr10:63661012-63856707-ARID5B	+
chr10	63850620	63856707	mpeak_143	chr10:63661012_63856707_ARID5B_NM_+	+	chr10	63856300	63856500	mpeak:3728	chr10:63661012-63856707-ARID5B	+
chr10	63850620	63856707	mpeak_143	chr10:63661012_63856707_ARID5B_NM_+	+	chr10	63856550	63856700	mpeak:3729	chr10:63661012-63856707-ARID5B	+
chr10	63850620	63856707	mpeak_144	chr10:63661012_63856707_ARID5B_NM_+	+	chr10	63853200	63853600	mpeak:3723	chr10:63661012-63856707-ARID5B	+
chr10	63850620	63856707	mpeak_144	chr10:63661012_63856707_ARID5B_NM_+	+	chr10	63856300	63856500	mpeak:3728	chr10:63661012-63856707-ARID5B	+
chr10	63850620	63856707	mpeak_144	chr10:63661012_63856707_ARID5B_NM_+	+	chr10	63856550	63856700	mpeak:3729	chr10:63661012-63856707-ARID5B	+
chr10	91533727	91534700	mpeak_155	chr10:91461346_91534700_KIF20B_NM_+	+	chr10	91534050	91534350	mpeak:4002	chr10:91461346-91534700-KIF20B	+
chr10	91533727	91534700	mpeak_155	chr10:91461346_91534700_KIF20B_NM_+	+	chr10	91534400	91534700	mpeak:4003	chr10:91461346-91534700-KIF20B	+
chr1	100549100	100550990	mpeak_49	chr1:100549100_100598651_SASS6_NM_-	-	chr1	100549550	100549800	mpeak:1180	chr1:100549100-100598651-SASS6	-
chr1	113666496	113667824	mpeak_54	chr1:113615791_113667824_LRIG2_NM_+	+	chr1	113667250	113667450	mpeak:1343	chr1:113615791-113667824-LRIG2	+
chr1	151375199	151378940	mpeak_74	chr1:151375199_151431941_POGZ_NM_-	-	chr1	151376250	151377300	mpeak:1894	chr1:151375199-151431941-POGZ	-
chr1	151375199	151378940	mpeak_75	chr1:151375199_151431941_POGZ_NM_-	-	chr1	151376250	151377300	mpeak:1894	chr1:151375199-151431941-POGZ	-
chr11	61919233	61920635	mpeak_201	chr11:61891444_61920635_INCENP_NM_+	+	chr11	61919450	61919600	mpeak:5129	chr11:61891444-61920635-INCENP	+
chr11	61919233	61920635	mpeak_202	chr11:61891444_61920635_INCENP_NM_+	+	chr11	61919450	61919600	mpeak:5129	chr11:61891444-61920635-INCENP	+
chr11	61919233	61920635	mpeak_203	chr11:61891444_61920635_INCENP_NM_+	+	chr11	61919450	61919600	mpeak:5129	chr11:61891444-61920635-INCENP	+
chr11	61919233	61920635	mpeak_204	chr11:61891444_61920635_INCENP_NM_+	+	chr11	61919450	61919600	mpeak:5129	chr11:61891444-61920635-INCENP	+
chr11	76506652	76509198	mpeak_217	chr11:76493356_76509198_TSKU_NM_+	+	chr11	76507900	76508250	mpeak:5514	chr11:76493356-76509198-TSKU	+
chr11	76506652	76509198	mpeak_217	chr11:76493356_76509198_TSKU_NM_+	+	chr11	76508300	76508500	mpeak:5515	chr11:76493356-76509198-TSKU	+
chr11	76506652	76509198	mpeak_217	chr11:76493356_76509198_TSKU_NM_+	+	chr11	76508550	76508950	mpeak:5516	chr11:76493356-76509198-TSKU	+
chr11	82895720	82896835	mpeak_223	chr11:82868136_82896835_PCF11_NM_+	+	chr11	82896600	82896800	mpeak:5577	chr11:82868136-82896835-PCF11	+
chr12	122267971	122270562	mpeak_289	chr12:122242637_122270562_SETD1B_NM_+	+	chr12	122269700	122269850	mpeak:7882	chr12:122242637-122270562-SETD1B	+
chr12	122267971	122270562	mpeak_290	chr12:122242637_122270562_SETD1B_NM_+	+	chr12	122269700	122269850	mpeak:7882	chr12:122242637-122270562-SETD1B	+
chr12	12268960	12274354	mpeak_246	chr12:12268960_12419811_LRP6_NM_-	-	chr12	12272100	12272400	mpeak:6191	chr12:12268960-12419811-LRP6	-
chr12	46298716	46301819	mpeak_251	chr12:46123619_46301819_ARID2_NM_+	+	chr12	46299250	46300300	mpeak:6505	chr12:46123619-46301819-ARID2	+
chr12	46298716	46301819	mpeak_252	chr12:46123619_46301819_ARID2_NM_+	+	chr12	46299250	46300300	mpeak:6505	chr12:46123619-46301819-ARID2	+
chr12	6437922	6438788	mpeak_244	chr12:6437922_6451283_TNFRSF1A_NM_-	-	chr12	6437900	6438550	mpeak:6097	chr12:6437922-6451283-TNFRSF1A	-
chr1	27105513	27108601	mpeak_18	chr1:27022521_27108601_ARID1A_NM_+	+	chr1	27107900	27108600	mpeak:387	chr1:27022521-27108601-ARID1A	+
chr12	72003378	72004345	mpeak_272	chr12:72003378_72057749_ZFC3H1_NM_-	-	chr12	72003800	72003950	mpeak:7186	chr12:72003378-72057749-ZFC3H1	-
chr12	72003378	72004345	mpeak_273	chr12:72003378_72057749_ZFC3H1_NM_-	-	chr12	72003800	72003950	mpeak:7186	chr12:72003378-72057749-ZFC3H1	-
chr13	30776766	30782875	mpeak_313	chr13:30776766_30881624_KATNAL1_NM_-	-	chr13	30780200	30780450	mpeak:8295	chr13:30776766-30881624-KATNAL1	-
chr13	33349154	33352158	mpeak_315	chr13:33160563_33352158_PDS5B_NM_+	+	chr13	33349150	33350500	mpeak:8351	chr13:33160563-33352158-PDS5B	+
chr13	42803234	42817033	mpeak_322	chr13:42614171_42817033_DGKH_NM_+	+	chr13	42809050	42809200	mpeak:8444	chr13:42712177-42830716-DGKH	+
chr13	42803234	42817033	mpeak_322	chr13:42614171_42817033_DGKH_NM_+	+	chr13	42813750	42814000	mpeak:8450	chr13:42712177-42830716-DGKH	+
chr13	42803234	42817033	mpeak_323	chr13:42614171_42817033_DGKH_NM_+	+	chr13	42809050	42809200	mpeak:8444	chr13:42712177-42830716-DGKH	+
chr13	42803234	42817033	mpeak_323	chr13:42614171_42817033_DGKH_NM_+	+	chr13	42813750	42814000	mpeak:8450	chr13:42712177-42830716-DGKH	+
chr13	42803234	42817033	mpeak_324	chr13:42614171_42817033_DGKH_NM_+	+	chr13	42809050	42809200	mpeak:8444	chr13:42712177-42830716-DGKH	+
chr13	42803234	42817033	mpeak_324	chr13:42614171_42817033_DGKH_NM_+	+	chr13	42813750	42814000	mpeak:8450	chr13:42712177-42830716-DGKH	+
chr13	42803234	42817033	mpeak_325	chr13:42614171_42817033_DGKH_NM_+	+	chr13	42809050	42809200	mpeak:8444	chr13:42712177-42830716-DGKH	+
chr13	42803234	42817033	mpeak_325	chr13:42614171_42817033_DGKH_NM_+	+	chr13	42813750	42814000	mpeak:8450	chr13:42712177-42830716-DGKH	+
chr14	105475909	105478272	mpeak_403	chr14:105475909_105487425_CDCA4_NM_-	-	chr14	105476250	105476500	mpeak:9873	chr14:105475909-105487425-CDCA4	-
chr14	105475909	105478272	mpeak_403	chr14:105475909_105487425_CDCA4_NM_-	-	chr14	105476850	105477350	mpeak:9875	chr14:105475909-105487425-CDCA4	-
chr14	23742843	23746396	mpeak_342	chr14:23742843_23755309_HOMEZ_NM_-	-	chr14	23743850	23744150	mpeak:8902	chr14:23742843-23755309-HOMEZ	-
chr14	38058756	38061916	mpeak_347	chr14:38058756_38064325_FOXA1_NM_-	-	chr14	38058800	38060000	mpeak:9024	chr14:38058756-38064325-FOXA1	-
chr14	38058756	38061916	mpeak_347	chr14:38058756_38064325_FOXA1_NM_-	-	chr14	38060050	38060600	mpeak:9025	chr14:38058756-38064325-FOXA1	-
chr14	38058756	38061916	mpeak_347	chr14:38058756_38064325_FOXA1_NM_-	-	chr14	38060750	38060850	mpeak:9026	chr14:38058756-38064325-FOXA1	-
chr14	55817098	55820329	mpeak_357	chr14:55738020_55820329_FBXO34_NM_+	+	chr14	55819950	55820100	mpeak:9206	chr14:55738020-55820329-FBXO34	+
chr14	55817098	55820329	mpeak_358	chr14:55738020_55820329_FBXO34_NM_+	+	chr14	55819950	55820100	mpeak:9206	chr14:55738020-55820329-FBXO34	+
chr14	95552564	95557000	mpeak_387	chr14:95552564_95624347_DICER1_NM_-	-	chr14	95552850	95553450	mpeak:9684	chr14:95552564-95624347-DICER1	-
chr14	95552564	95557000	mpeak_387	chr14:95552564_95624347_DICER1_NM_-	-	chr14	95553500	95553850	mpeak:9685	chr14:95552564-95624347-DICER1	-
chr14	95552564	95557000	mpeak_387	chr14:95552564_95624347_DICER1_NM_-	-	chr14	95555200	95556000	mpeak:9689	chr14:95552564-95624347-DICER1	-
chr15	43036541	43038455	mpeak_411	chr15:43036541_43213007_TTBK2_NM_-	-	chr15	43037200	43037350	mpeak:10037	chr15:43036541-43213007-TTBK2	-
chr15	86287858	86292589	mpeak_435	chr15:85923846_86292589_AKAP13_NM_+	+	chr15	86289450	86289600	mpeak:10626	chr15:85923846-86292589-AKAP13	+
chr16	22092016	22095972	mpeak_471	chr16:22019455_22095972_C16orf52_NM_+	+	chr16	22092200	22092300	mpeak:11233	chr16:22019455-22095972-C16orf52	+
chr16	22092016	22095972	mpeak_471	chr16:22019455_22095972_C16orf52_NM_+	+	chr16	22092550	22092600	mpeak:11234	chr16:22019455-22095972-C16orf52	+
chr16	22092016	22095972	mpeak_472	chr16:22019455_22095972_C16orf52_NM_+	+	chr16	22092200	22092300	mpeak:11233	chr16:22019455-22095972-C16orf52	+
chr16	22092016	22095972	mpeak_472	chr16:22019455_22095972_C16orf52_NM_+	+	chr16	22092550	22092600	mpeak:11234	chr16:22019455-22095972-C16orf52	+
chr16	30565084	30567431	mpeak_475	chr16:30565084_30569642_ZNF764_NM_-	-	chr16	30566050	30566200	mpeak:11378	chr16:30565084-30569642-ZNF764	-
chr17	26521607	26523404	mpeak_539	chr17:26369687_26523404_NLK_NM_+	+	chr17	26522800	26522900	mpeak:12628	chr17:26369687-26523404-NLK	+
chr17	27869578	27878921	mpeak_541	chr17:27717942_27878921_TAOK1_NM_+	+	chr17	27876600	27878100	mpeak:12707	chr17:27717942-27878921-TAOK1	+
chr17	27952956	27959949	mpeak_542	chr17:27952956_28257246_SSH2_NM_-	-	chr17	27953200	27953400	mpeak:12715	chr17:27952956-28257246-SSH2	-
chr17	37408896	37417820	mpeak_549	chr17:37408896_37557909_FBXL20_NM_-	-	chr17	37415450	37415700	mpeak:12856	chr17:37408896-37557909-FBXL20	-
chr17	59756546	59761501	mpeak_569	chr17:59756546_59940920_BRIP1_NM_-	-	chr17	59757500	59757550	mpeak:13938	chr17:59756546-59940920-BRIP1	-
chr17	59756546	59761501	mpeak_570	chr17:59756546_59940920_BRIP1_NM_-	-	chr17	59757500	59757550	mpeak:13938	chr17:59756546-59940920-BRIP1	-
chr17	59756546	59761501	mpeak_571	chr17:59756546_59940920_BRIP1_NM_-	-	chr17	59757500	59757550	mpeak:13938	chr17:59756546-59940920-BRIP1	-
chr17	80559178	80562483	mpeak_590	chr17:80477593_80562483_FOXK2_NM_+	+	chr17	80561550	80561700	mpeak:14573	chr17:80477593-80562483-FOXK2	+
chr17	80559178	80562483	mpeak_591	chr17:80477593_80562483_FOXK2_NM_+	+	chr17	80561550	80561700	mpeak:14573	chr17:80477593-80562483-FOXK2	+
chr17	80559178	80562483	mpeak_592	chr17:80477593_80562483_FOXK2_NM_+	+	chr17	80561550	80561700	mpeak:14573	chr17:80477593-80562483-FOXK2	+
chr18	29843483	29848731	mpeak_601	chr18:29843483_30050447_GAREM_NM_-	-	chr18	29845150	29845250	mpeak:14773	chr18:29843483-30050447-GAREM	-
chr18	29843483	29848731	mpeak_602	chr18:29843483_30050447_GAREM_NM_-	-	chr18	29845150	29845250	mpeak:14773	chr18:29843483-30050447-GAREM	-
chr18	29843483	29848731	mpeak_603	chr18:29843483_30050447_GAREM_NM_-	-	chr18	29845150	29845250	mpeak:14773	chr18:29843483-30050447-GAREM	-
chr1	85623355	85624932	mpeak_36	chr1:85623355_85666728_SYDE2_NM_-	-	chr1	85623350	85623600	mpeak:1035	chr1:85623355-85666728-SYDE2	-
chr1	85623355	85624932	mpeak_36	chr1:85623355_85666728_SYDE2_NM_-	-	chr1	85624200	85624400	mpeak:1038	chr1:85623355-85666728-SYDE2	-
chr1	85623355	85624932	mpeak_37	chr1:85623355_85666728_SYDE2_NM_-	-	chr1	85623350	85623600	mpeak:1035	chr1:85623355-85666728-SYDE2	-
chr1	85623355	85624932	mpeak_37	chr1:85623355_85666728_SYDE2_NM_-	-	chr1	85624200	85624400	mpeak:1038	chr1:85623355-85666728-SYDE2	-
chr1	85623355	85624932	mpeak_38	chr1:85623355_85666728_SYDE2_NM_-	-	chr1	85623350	85623600	mpeak:1035	chr1:85623355-85666728-SYDE2	-
chr1	85623355	85624932	mpeak_38	chr1:85623355_85666728_SYDE2_NM_-	-	chr1	85624200	85624400	mpeak:1038	chr1:85623355-85666728-SYDE2	-
chr1	85623355	85624932	mpeak_39	chr1:85623355_85666728_SYDE2_NM_-	-	chr1	85623350	85623600	mpeak:1035	chr1:85623355-85666728-SYDE2	-
chr1	85623355	85624932	mpeak_39	chr1:85623355_85666728_SYDE2_NM_-	-	chr1	85624200	85624400	mpeak:1038	chr1:85623355-85666728-SYDE2	-
chr1	85731459	85733665	mpeak_40	chr1:85731459_85742587_BCL10_NM_-	-	chr1	85731950	85732250	mpeak:1049	chr1:85731459-85742587-BCL10	-
chr19	12686919	12692538	mpeak_624	chr19:12686919_12721623_ZNF490_NM_-	-	chr19	12687200	12687350	mpeak:15379	chr19:12686919-12721623-ZNF490	-
chr19	12686919	12692538	mpeak_624	chr19:12686919_12721623_ZNF490_NM_-	-	chr19	12687400	12687700	mpeak:15380	chr19:12686919-12721623-ZNF490	-
chr19	12686919	12692538	mpeak_624	chr19:12686919_12721623_ZNF490_NM_-	-	chr19	12690250	12690450	mpeak:15382	chr19:12686919-12721623-ZNF490	-
chr19	21906842	21910791	mpeak_643	chr19:21906842_21950430_ZNF100_NM_-	-	chr19	21906850	21906900	mpeak:15644	chr19:21906842-21950430-ZNF100	-
chr19	21906842	21910791	mpeak_643	chr19:21906842_21950430_ZNF100_NM_-	-	chr19	21907150	21907600	mpeak:15645	chr19:21906842-21950430-ZNF100	-
chr19	21906842	21910791	mpeak_643	chr19:21906842_21950430_ZNF100_NM_-	-	chr19	21907650	21907950	mpeak:15646	chr19:21906842-21950430-ZNF100	-
chr19	21987750	21992609	mpeak_644	chr19:21987750_22034870_ZNF43_NM_-	-	chr19	21988050	21988500	mpeak:15653	chr19:21987750-22034870-ZNF43	-
chr19	21987750	21992609	mpeak_644	chr19:21987750_22034870_ZNF43_NM_-	-	chr19	21988700	21988900	mpeak:15654	chr19:21987750-22034870-ZNF43	-
chr19	24309055	24312769	mpeak_653	chr19:24216206_24312769_ZNF254_NM_+	+	chr19	24312300	24312400	mpeak:15718	chr19:24216206-24312769-ZNF254	+
chr19	24309055	24312769	mpeak_654	chr19:24216206_24312769_ZNF254_NM_+	+	chr19	24312300	24312400	mpeak:15718	chr19:24216206-24312769-ZNF254	+
chr19	24309055	24312769	mpeak_655	chr19:24216206_24312769_ZNF254_NM_+	+	chr19	24312300	24312400	mpeak:15718	chr19:24216206-24312769-ZNF254	+
chr19	37879207	37883966	mpeak_664	chr19:37862058_37883966_ZNF527_NM_+	+	chr19	37883250	37883350	mpeak:15885	chr19:37862058-37883966-ZNF527	+
chr19	57722721	57734214	mpeak_692	chr19:57702867_57734214_ZNF264_NM_+	+	chr19	57728750	57728850	mpeak:16328	chr19:57702867-57734214-ZNF264	+
chr19	58369943	58376491	mpeak_693	chr19:58361180_58376491_ZNF587_NM_+	+	chr19	58372350	58372800	mpeak:16390	chr19:58361180-58376491-ZNF587	+
chr19	58369943	58376491	mpeak_693	chr19:58361180_58376491_ZNF587_NM_+	+	chr19	58372950	58373250	mpeak:16392	chr19:58361180-58376491-ZNF587	+
chr20	44689625	44691528	mpeak_792	chr20:44689625_44718580_NCOA5_NM_-	-	chr20	44689900	44690400	mpeak:19320	chr20:44689625-44718580-NCOA5	-
chr20	44689625	44691528	mpeak_792	chr20:44689625_44718580_NCOA5_NM_-	-	chr20	44690500	44690950	mpeak:19321	chr20:44689625-44718580-NCOA5	-
chr21	40557403	40569341	mpeak_809	chr21:40557403_40685712_BRWD1_NM_-	-	chr21	40567350	40568100	mpeak:20269	chr21:40557403-40685712-BRWD1	-
chr21	40557403	40569341	mpeak_810	chr21:40557403_40685712_BRWD1_NM_-	-	chr21	40567350	40568100	mpeak:20269	chr21:40557403-40685712-BRWD1	-
chr21	40557403	40569341	mpeak_811	chr21:40557403_40685712_BRWD1_NM_-	-	chr21	40567350	40568100	mpeak:20269	chr21:40557403-40685712-BRWD1	-
chr21	40557403	40569341	mpeak_812	chr21:40557403_40685712_BRWD1_NM_-	-	chr21	40567350	40568100	mpeak:20269	chr21:40557403-40685712-BRWD1	-
chr21	40557403	40569341	mpeak_813	chr21:40557403_40685712_BRWD1_NM_-	-	chr21	40567350	40568100	mpeak:20269	chr21:40557403-40685712-BRWD1	-
chr2	160175489	160176929	mpeak_743	chr2:160175489_160473112_BAZ2B_NM_-	-	chr2	160176300	160176400	mpeak:18145	chr2:160175489-160473112-BAZ2B	-
chr2	160175489	160176929	mpeak_744	chr2:160175489_160473112_BAZ2B_NM_-	-	chr2	160176300	160176400	mpeak:18145	chr2:160175489-160473112-BAZ2B	-
chr2	160175489	160176929	mpeak_745	chr2:160175489_160473112_BAZ2B_NM_-	-	chr2	160176300	160176400	mpeak:18145	chr2:160175489-160473112-BAZ2B	-
chr22	31721789	31723295	mpeak_832	chr22:31721789_31742249_PATZ1_NM_-	-	chr22	31721950	31722250	mpeak:20639	chr22:31721789-31742249-PATZ1	-
chr22	31721789	31723295	mpeak_832	chr22:31721789_31742249_PATZ1_NM_-	-	chr22	31722350	31722550	mpeak:20640	chr22:31721789-31742249-PATZ1	-
chr22	31721789	31723295	mpeak_832	chr22:31721789_31742249_PATZ1_NM_-	-	chr22	31722600	31722800	mpeak:20641	chr22:31721789-31742249-PATZ1	-
chr2	239307394	239309541	mpeak_771	chr2:239229184_239309541_TRAF3IP1_NM_+	+	chr2	239308700	239308850	mpeak:18885	chr2:239229184-239309541-TRAF3IP1	+
chr3	119540801	119545702	mpeak_893	chr3:119540801_119813264_GSK3B_NM_-	-	chr3	119540800	119541000	mpeak:21998	chr3:119540801-119813264-GSK3B	-
chr3	119540801	119545702	mpeak_894	chr3:119540801_119813264_GSK3B_NM_-	-	chr3	119540800	119541000	mpeak:21998	chr3:119540801-119813264-GSK3B	-
chr3	160153290	160156974	mpeak_903	chr3:160153290_160167626_TRIM59_NM_-	-	chr3	160154350	160155000	mpeak:22525	chr3:160153290-160167626-TRIM59	-
chr3	160153290	160156974	mpeak_903	chr3:160153290_160167626_TRIM59_NM_-	-	chr3	160155250	160155500	mpeak:22527	chr3:160153290-160167626-TRIM59	-
chr3	194995464	195000157	mpeak_915	chr3:194995464_195163817_ACAP2_NM_-	-	chr3	194998700	194999200	mpeak:22988	chr3:194995464-195163817-ACAP2	-
chr3	5024520	5026865	mpeak_847	chr3:5021096_5026865_BHLHE40_NM_+	+	chr3	5025350	5025550	mpeak:20936	chr3:5021096-5026865-BHLHE40	+
chr3	5024520	5026865	mpeak_847	chr3:5021096_5026865_BHLHE40_NM_+	+	chr3	5026400	5026850	mpeak:20937	chr3:5021096-5026865-BHLHE40	+
chr3	63985125	63989136	mpeak_876	chr3:63850232_63989136_ATXN7_NM_+	+	chr3	63988650	63989000	mpeak:21702	chr3:63850232-63989136-ATXN7	+
chr3	63985125	63989136	mpeak_877	chr3:63850232_63989136_ATXN7_NM_+	+	chr3	63988650	63989000	mpeak:21702	chr3:63850232-63989136-ATXN7	+
chr3	63985125	63989136	mpeak_878	chr3:63850232_63989136_ATXN7_NM_+	+	chr3	63988650	63989000	mpeak:21702	chr3:63850232-63989136-ATXN7	+
chr3	63985125	63989136	mpeak_879	chr3:63850232_63989136_ATXN7_NM_+	+	chr3	63988650	63989000	mpeak:21702	chr3:63850232-63989136-ATXN7	+
chr3	63985125	63989136	mpeak_880	chr3:63850232_63989136_ATXN7_NM_+	+	chr3	63988650	63989000	mpeak:21702	chr3:63850232-63989136-ATXN7	+
chr3	63985125	63989136	mpeak_881	chr3:63850232_63989136_ATXN7_NM_+	+	chr3	63988650	63989000	mpeak:21702	chr3:63850232-63989136-ATXN7	+
chr3	63985125	63989136	mpeak_882	chr3:63850232_63989136_ATXN7_NM_+	+	chr3	63988650	63989000	mpeak:21702	chr3:63850232-63989136-ATXN7	+
chr3	63985125	63989136	mpeak_883	chr3:63850232_63989136_ATXN7_NM_+	+	chr3	63988650	63989000	mpeak:21702	chr3:63850232-63989136-ATXN7	+
chr3	63985125	63989136	mpeak_884	chr3:63850232_63989136_ATXN7_NM_+	+	chr3	63988650	63989000	mpeak:21702	chr3:63850232-63989136-ATXN7	+
chr3	63985125	63989136	mpeak_885	chr3:63850232_63989136_ATXN7_NM_+	+	chr3	63988650	63989000	mpeak:21702	chr3:63850232-63989136-ATXN7	+
chr4	125585203	125588669	mpeak_953	chr4:125585203_125633887_ANKRD50_NM_-	-	chr4	125585600	125586750	mpeak:24214	chr4:125585203-125633887-ANKRD50	-
chr4	139978870	139980761	mpeak_955	chr4:139978870_140060630_ELF2_NM_-	-	chr4	139979050	139979250	mpeak:24267	chr4:139978870-140060630-ELF2	-
chr4	147175132	147177672	mpeak_961	chr4:147175132_147443123_SLC10A7_NM_-	-	chr4	147175450	147175700	mpeak:24399	chr4:147175132-147443123-SLC10A7	-
chr4	73940501	73942007	mpeak_939	chr4:73940501_74124502_ANKRD17_NM_-	-	chr4	73941600	73941850	mpeak:23635	chr4:73940501-74124502-ANKRD17	-
chr5	100142638	100147833	mpeak_992	chr5:100142638_100238989_ST8SIA4_NM_-	-	chr5	100145350	100147350	mpeak:25263	chr5:100142638-100238989-ST8SIA4	-
chr5	130977406	130980456	mpeak_996	chr5:130977406_131132756_FNIP1_NM_-	-	chr5	130977800	130978800	mpeak:25476	chr5:130977406-131132756-FNIP1	-
chr5	58264865	58270907	mpeak_970	chr5:58264865_59783925_PDE4D_NM_-	-	chr5	58266100	58266200	mpeak:24909	chr5:58264865-59783925-PDE4D	-
chr5	58264865	58270907	mpeak_971	chr5:58264865_59783925_PDE4D_NM_-	-	chr5	58266100	58266200	mpeak:24909	chr5:58264865-59783925-PDE4D	-
chr5	65374250	65376851	mpeak_974	chr5:65222381_65376851_ERBB2IP_NM_+	+	chr5	65374550	65375400	mpeak:24948	chr5:65222381-65376851-ERBB2IP	+
chr5	66458974	66465423	mpeak_975	chr5:65892175_66465423_MAST4_NM_+	+	chr5	66464750	66464800	mpeak:24969	chr5:65892175-66465423-MAST4	+
chr5	66458974	66465423	mpeak_976	chr5:65892175_66465423_MAST4_NM_+	+	chr5	66464750	66464800	mpeak:24969	chr5:65892175-66465423-MAST4	+
chr5	66458974	66465423	mpeak_977	chr5:65892175_66465423_MAST4_NM_+	+	chr5	66464750	66464800	mpeak:24969	chr5:65892175-66465423-MAST4	+
chr6	10396915	10398938	mpeak_1025	chr6:10396915_10419797_TFAP2A_NM_-	-	chr6	10397650	10398000	mpeak:26234	chr6:10396915-10419797-TFAP2A	-
chr6	17615265	17616412	mpeak_1029	chr6:17615265_17707065_NUP153_NM_-	-	chr6	17615500	17615750	mpeak:26309	chr6:17615265-17707065-NUP153	-
chr6	43581396	43588260	mpeak_1039	chr6:43543877_43588260_POLH_NM_+	+	chr6	43583400	43583650	mpeak:26719	chr6:43543877-43588260-POLH	+
chr6	88384577	88385325	mpeak_1054	chr6:88384577_88411985_AKIRIN2_NM_-	-	chr6	88384600	88385050	mpeak:27013	chr6:88384577-88411985-AKIRIN2	-
chr6	99847840	99849506	mpeak_1058	chr6:99847840_99873207_PNISR_NM_-	-	chr6	99847900	99848050	mpeak:27092	chr6:99847840-99873207-PNISR	-
chr6	99847840	99849506	mpeak_1059	chr6:99847840_99873207_PNISR_NM_-	-	chr6	99847900	99848050	mpeak:27092	chr6:99847840-99873207-PNISR	-
chr6	99847840	99849506	mpeak_1060	chr6:99847840_99873207_PNISR_NM_-	-	chr6	99847900	99848050	mpeak:27092	chr6:99847840-99873207-PNISR	-
chr7	104752271	104754532	mpeak_1127	chr7:104654636_104754532_KMT2E_NM_+	+	chr7	104753800	104754500	mpeak:28962	chr7:104654636-104754532-KMT2E	+
chr7	104752271	104754532	mpeak_1128	chr7:104654636_104754532_KMT2E_NM_+	+	chr7	104753800	104754500	mpeak:28962	chr7:104654636-104754532-KMT2E	+
chr7	129394857	129396922	mpeak_1134	chr7:129251542_129396922_NRF1_NM_+	+	chr7	129396700	129396750	mpeak:29101	chr7:129251542-129396922-NRF1	+
chr7	138982532	138992982	mpeak_1142	chr7:138916230_138992982_UBN2_NM_+	+	chr7	138986200	138986500	mpeak:29221	chr7:138916230-138992982-UBN2	+
chr7	138982532	138992982	mpeak_1142	chr7:138916230_138992982_UBN2_NM_+	+	chr7	138986550	138986650	mpeak:29222	chr7:138916230-138992982-UBN2	+
chr7	138982532	138992982	mpeak_1142	chr7:138916230_138992982_UBN2_NM_+	+	chr7	138989550	138989600	mpeak:29225	chr7:138916230-138992982-UBN2	+
chr7	138982532	138992982	mpeak_1142	chr7:138916230_138992982_UBN2_NM_+	+	chr7	138992400	138992500	mpeak:29229	chr7:138916230-138992982-UBN2	+
chr7	138982532	138992982	mpeak_1142	chr7:138916230_138992982_UBN2_NM_+	+	chr7	138992750	138992850	mpeak:29230	chr7:138916230-138992982-UBN2	+
chr7	5515427	5521562	mpeak_1095	chr7:5515427_5553399_FBXL18_NM_-	-	chr7	5517200	5517400	mpeak:28075	chr7:5515427-5553399-FBXL18	-
chr7	6728063	6732334	mpeak_1096	chr7:6728063_6746566_ZNF12_NM_-	-	chr7	6729400	6729600	mpeak:28111	chr7:6728063-6746566-ZNF12	-
chr7	6728063	6732334	mpeak_1097	chr7:6728063_6746566_ZNF12_NM_-	-	chr7	6729400	6729600	mpeak:28111	chr7:6728063-6746566-ZNF12	-
chr8	146102335	146108221	mpeak_1209	chr8:146102335_146126846_ZNF250_NM_-	-	chr8	146105350	146105450	mpeak:31058	chr8:146102335-146126846-ZNF250	-
chr8	146102335	146108221	mpeak_1210	chr8:146102335_146126846_ZNF250_NM_-	-	chr8	146105350	146105450	mpeak:31058	chr8:146102335-146126846-ZNF250	-
chr9	37438099	37442552	mpeak_1227	chr9:37438099_37465407_ZBTB5_NM_-	-	chr9	37439950	37440000	mpeak:31260	chr9:37438099-37465407-ZBTB5	-
chrX	67262185	67267005	mpeak_1270	chrX:67262185_67653299_OPHN1_NM_-	-	chrX	67263100	67263250	mpeak:32545	chrX:67262185-67653299-OPHN1	-
