# Supplementary material for: Compartment-specific and ELAVL1-coordinated regulation of intronic polyadenylation isoforms by doxorubicin
Source: HighWire-hosted journal article supplement (doi:10.1101/gr.276192.121), 2022-07-01
Supplement: Supplemental_Table_S18.xlsx.xlsx [file Supplemental_Table_S18.xlsx.xlsx]

## Sheet: Sheet1
Supplemental Table S18 : List of IPA isoforms regulated by ELAVL1 depletion in MCF-7 cytosol without doxorubicin treatment by 3’-seq analysis.
IPA peaks	baseMean	log2FoldChange IPA:LE	lfcSE	stat	pvalue	padj	4	24	1	11	21	LE.04	LE.24	LE.01	LE.11	LE.21	%IPA (siELAVL1)	%IPA (siCTRL)	log2FC_IPA	log2FC_LE	log2FC IPA-logFC LE	gene	Tian polyA site	Zavolan polyA site
chrX:57358276-57358358:mpeak_87430|chrX_57313109_57515189_FAAH2_NM_+|	8.26898	-4.08649	1.90507	-2.14506	0.0319482	NA	1.10967	0	0	6.35534	6.77266	12.2064	27.189	6.83921	14.8291	7.38836	2.81675	45.1806	-2.97948	1.02412	-4.0036	FAAH2	chrX:57358327:+;chrX:57358356:+	chrX_57331893_+
chrX:24860017-24860094:mpeak_86883|chrX_24712063_25013921_POLA1_NM_+|	13.5929	-4.2101	1.66457	-2.52925	0.0114307	0.220256	0	0	9.11895	3.17767	3.69418	15.5354	23.9263	26.217	22.2437	32.0162	0	19.87	-Inf	-0.443158	-Inf	POLA1	chrX:24860073:+	chrX_24841954_+
chrX:122736088-122736187:mpeak_88310|chrX_122735189_122866904_THOC2_NM_-|	15.0477	-3.80314	1.75322	-2.16923	0.0300655	0.314668	0	0	2.27974	0	4.92557	22.1934	36.9771	22.7974	24.3621	36.9418	0	8.56742	-Inf	0.0777123	-Inf	THOC2	chrX:122736084:-;chrX:122736134:-	chrX_123602235_-;chrX_123602270_-
chrX:11787168-11787220:mpeak_86595|chrX_11776277_11793098_MSL3_NM_+|	11.0212	-4.42409	2.04919	-2.15895	0.0308544	NA	0	0	0	9.53301	1.23139	33.2901	11.9632	13.6784	15.8884	24.6279	0	19.8625	-Inf	0.324835	-Inf	MSL3	chrX:11787221:+	chrX_11769099_+
chr9:37884018-37884075:mpeak_83637|chr9_37880745_37904350_SLC25A51_NR_-|	10.7424	-4.37354	1.92363	-2.27359	0.0229905	NA	0	0	0	5.29612	11.0825	9.98703	19.5761	25.0771	22.2437	14.161	0	26.6398	-Inf	-0.471398	-Inf	SLC25A51	chr9:37884023:-	chr9_37884027_-
chr9:139416744-139416814:mpeak_86265|chr9_139392010_139440238_NOTCH1_NM_-|	25.4544	-4.57499	1.72147	-2.65761	0.00786979	0.203115	0	0	0	9.53301	3.69418	34.3998	67.4288	50.1542	41.3097	48.0243	0	9.48266	-Inf	0.130961	-Inf	NOTCH1	chr9:139416759:-	chr9_136522287_-
chr8:99206735-99206902:mpeak_81434|chr8_99205318_99306621_NIPAL2_NM_-|	15.1669	-4.36375	2.07442	-2.1036	0.0354132	0.335549	0	0	0	0	8.61975	43.2771	22.8388	30.7764	19.066	27.0906	0	11.2042	-Inf	0.366356	-Inf	NIPAL2	chr8:99206802:-	chr8_98194501_-;chr8_98194577_-;chr8_98194669_-
chr8:74461834-74461898:mpeak_80782|chr8_74333700_74659943_STAU2_NM_-|	17.1856	-2.32264	0.869309	-2.67183	0.00754397	0.203115	8.87736	6.52537	35.3359	12.7107	16.0081	21.0837	29.3641	17.098	13.7699	11.0825	30.532	152.691	-1.47116	0.851069	-2.32223	STAU2	chr8:74461836:-	chr8_73549586_-;chr8_73549618_-
chr8:71119347-71119406:mpeak_80739|chr8_71025878_71316020_NCOA2_NM_-|	17.818	-4.62247	1.71972	-2.68792	0.0071899	0.203115	0	0	6.83921	4.2369	1.84709	25.5224	48.9402	42.1751	19.066	29.5534	0	14.2334	-Inf	0.298874	-Inf	NCOA2	chr8:71119353:-	-
chr8:38124481-38124571:mpeak_80059|chr8_38122122_38126738_PPAPDC1B_NM_-|	74.9184	-1.28805	0.555352	-2.31935	0.0203763	0.268068	33.2901	41.3273	25.0771	59.3165	54.797	173.109	129.42	76.3712	75.2049	81.2719	24.6646	59.7775	-0.314515	0.962645	-1.27716	PPAPDC1B	chr8:38124500:-	chr8_38266984_-;chr8_38267020_-
chr8:23086255-23086306:mpeak_79683|chr8_23082733_23087460_LOC389641_NR_+|	11.212	-4.39304	1.85673	-2.36601	0.017981	NA	0	0	2.27974	2.11845	4.92557	11.0967	36.9771	11.3987	13.7699	29.5534	0	17.0384	-Inf	0.398091	-Inf	LOC389641	chr8:23086309:+	chr8_23228810_+
chr8:17089018-17089129:mpeak_79485|chr8_17088357_17104387_CNOT7_NM_-|	474.69	-1.5575	0.42182	-3.69234	0.000222197	0.0678644	23.3031	30.4517	60.413	106.982	88.6603	855.556	836.334	866.3	986.137	892.76	3.1772	9.32738	-1.66703	-0.113311	-1.55371	CNOT7	chr8:17089021:-;chr8:17089075:-	chr8_17231513_-;chr8_17231570_-
chr8:141887973-141888024:mpeak_82517|chr8_141669777_142011412_PTK2_NM_-|	140.047	-2.50759	1.05794	-2.37025	0.0177761	0.253162	3.32901	2.17512	3.4196	32.8359	16.0081	245.237	256.664	213.155	369.669	257.977	1.09666	6.21593	-2.66226	-0.159398	-2.50286	PTK2	chr8:141887970:-	chr8_140877874_-
chr8:133845026-133845088:mpeak_82404|chr8_133787603_133858025_PHF20L1_NM_+|	33.5968	-4.54842	1.56889	-2.89913	0.003742	0.182884	0	0	7.97908	3.17767	6.15696	51.0448	60.9034	78.6509	72.0272	56.0284	0	8.37599	-Inf	-0.299789	-Inf	PHF20L1	chr8:133845082:+	chr8_132832833_+
chr8:125703313-125703374:mpeak_82217|chr8_125565933_125740748_MTSS1_NM_-|	11.0654	-3.59184	1.72972	-2.07654	0.0378444	NA	1.10967	1.08756	2.27974	3.17767	24.6279	7.76769	28.2766	10.2588	14.8291	17.2395	6.09592	71.0774	-3.19034	0.353139	-3.54347	MTSS1	chr8:125703317:-	chr8_124691076_-
chr8:124115443-124115604:mpeak_82074|chr8_124084919_124164045_TBC1D31_NM_+|	7.50867	-5.26969	1.93613	-2.72177	0.00649338	NA	0	0	9.11895	11.6515	6.15696	5.54835	11.9632	9.11895	19.066	2.46279	0	87.8608	-Inf	-0.222515	-Inf	TBC1D31	chr8:124115592:+	chr8_123103351_+
chr8:123890113-123890163:mpeak_82049|chr8_123793900_123985481_ZHX2_NM_+|	29.6942	-4.85715	1.65172	-2.94066	0.00327509	0.179565	0	0	3.4196	2.11845	4.30987	51.0448	102.231	53.5738	32.8359	47.4086	0	7.35917	-Inf	0.780814	-Inf	ZHX2	chr8:123890211:+	-
chr7:87531138-87531321:mpeak_77129|chr7_87505543_87536502_DBF4_NM_+|	43.1059	-1.46167	0.639451	-2.28582	0.0222647	0.278472	4.43868	7.61293	18.2379	15.8884	16.0081	67.6899	79.392	76.3712	82.6195	62.801	8.19381	22.6043	-1.47161	-0.00762333	-1.46399	DBF4	chr7:87531256:+	chr7_87901919_+;chr7_87901998_+
chr7:156757653-156757765:mpeak_79166|chr7_156742416_156762222_NOM1_NM_+|	72.4571	-1.79365	0.78661	-2.28023	0.0225942	0.280184	5.54835	1.08756	12.5386	9.53301	8.00405	176.438	125.07	121.966	146.173	118.214	2.20091	7.7845	-1.59526	0.227237	-1.8225	NOM1	chr7:156757714:+	chr7_156965003_+;chr7_156965071_+
chr7:149183554-149183605:mpeak_78926|chr7_149172574_149194898_ZNF746_NM_-|	19.795	-2.7898	1.23927	-2.25116	0.0243756	0.288575	2.21934	0	5.69934	8.47379	6.15696	26.6321	48.9402	33.0562	28.599	38.1732	2.93671	20.365	-2.61045	0.183371	-2.79382	ZNF746	chr7:149183553:-	chr7_149486463_-
chr7:128125840-128125898:mpeak_78265|chr7_128116782_128141815_METTL2B_NM_+|	74.5004	-1.69004	0.809052	-2.08891	0.0367156	0.340399	4.43868	1.08756	7.97908	6.35534	7.38836	175.328	146.821	145.903	122.87	126.833	1.71543	5.49101	-1.38988	0.288623	-1.6785	METTL2B	chr7:128125897:+	chr7_128485842_+
chr6:3082044-3082234:mpeak_70372|chr6_3077057_3113286_RIPK1_NM_+|	45.1251	-2.10752	0.838966	-2.51204	0.0120034	0.220256	2.21934	3.26268	5.69934	14.8291	7.38836	96.5413	96.7929	75.2313	81.5602	67.7266	2.83552	12.4341	-1.76339	0.369228	-2.13262	RIPK1	chr6:3082139:+	-
chr5:180686209-180686305:mpeak_70304|chr5_180684495_180688119_TRIM52_NM_-|	11.3604	-5.15187	2.08091	-2.47577	0.0132948	NA	0	0	10.2588	2.11845	0	21.0837	34.802	11.3987	22.2437	11.6982	0	27.2984	-Inf	0.886638	-Inf	TRIM52	chr5:180686202:-	-
chr5:179313952-179314096:mpeak_70196|chr5_179291128_179334856_TBC1D9B_NM_-|	145.895	-1.14478	0.541204	-2.11525	0.0344082	0.331528	8.87736	10.8756	17.098	20.1253	16.6238	284.076	338.231	249.631	299.76	213.647	3.17415	7.05693	-0.861836	0.290834	-1.15267	TBC1D9B	chr5:179313950:-;chr5:179313975:-;chr5:179314044:-	chr5_179886977_-;chr5_179887044_-
chr5:176396710-176396760:mpeak_69924|chr5_176332493_176433795_UIMC1_NM_-|	23.8486	-3.64993	1.7396	-2.09814	0.0358924	0.337401	0	0	0	3.17767	5.54127	35.5095	43.5024	30.7764	76.2641	43.7144	0	5.78352	-Inf	-0.347102	-Inf	UIMC1	chr5:176396721:-	chr5_176969708_-
chr4:57266118-57266241:mpeak_63098|chr4_57261714_57301802_PPAT_NM_-|	78.161	-2.3346	0.945664	-2.46874	0.0135589	0.226979	1.10967	2.17512	6.83921	8.47379	8.00405	158.683	154.434	142.484	150.41	148.998	1.04906	5.27664	-2.24255	0.087969	-2.33052	PPAT	chr4:57266117:-;chr4:57266182:-	chr4_56399952_-;chr4_56400018_-
chr4:156644520-156644625:mpeak_65065|chr4_156587861_156651181_GUCY1A3_NM_+|	46.4087	-4.02618	1.59585	-2.52291	0.0116388	0.220256	1.10967	0	7.97908	2.11845	8.00405	76.5673	141.383	66.1124	82.6195	78.1934	0.509139	7.97689	-3.44295	0.526744	-3.96969	GUCY1A3	chr4:156644578:+;chr4:156644622:+	-
chr4:143347494-143347689:mpeak_64796|chr4_142950067_143767604_INPP4B_NM_-|	82.5761	-1.05971	0.500474	-2.11742	0.0342243	0.330345	18.8644	27.189	28.4967	36.0136	53.5656	139.818	153.346	129.945	119.692	118.829	15.7091	32.0452	-0.773372	0.255139	-1.02851	INPP4B	chr4:143347634:-	chr4_142426483_-
chr4:131343-131399:mpeak_61739|chr4_124357_195420_ZNF718_NR_+mpeak_61739|chr4_124357_154698_ZNF718_NM_+||	10.9563	-4.69964	1.7456	-2.69227	0.00709672	NA	0	0	3.4196	5.29612	3.07848	29.9611	16.3134	27.3568	10.5922	13.5453	0	22.9039	-Inf	0.430765	-Inf	ZNF718	chr4:131398:+	-
chr3:9433286-9433511:mpeak_56308|chr3_9432181_9439174_THUMPD3-AS1_NR_-|	41.524	-1.4013	0.604702	-2.31734	0.0204855	0.269177	18.8644	9.78805	31.9163	48.7243	26.4749	64.3609	52.2029	53.5738	50.8427	58.4911	24.5809	65.7523	-1.31748	0.102028	-1.4195	THUMPD3-AS1	chr3:9433306:-	chr3_9391591_-;chr3_9391816_-
chr3:49745346-49745396:mpeak_57701|chr3_49726949_49758617_RNF123_NM_+|	26.0419	-2.36142	1.05184	-2.24504	0.0247658	0.290015	2.21934	1.08756	7.97908	3.17767	11.6982	53.2642	43.5024	45.5947	44.4874	47.4086	3.4174	16.6229	-2.20399	0.0782094	-2.2822	RNF123	chr3:49745397:+	chr3_49707963_+
chr3:3213831-3213932:mpeak_56207|chr3_3192729_3221401_CRBN_NM_-|	169.508	-1.40932	0.427105	-3.2997	0.000967895	0.116158	32.1804	34.802	52.4339	54.0204	77.5777	378.398	326.268	226.834	285.99	226.576	9.50555	24.8894	-0.873141	0.515546	-1.38869	CRBN	chr3:3213838:-;chr3:3213871:-	chr3_3172165_-
chr3:196223084-196223173:mpeak_61568|chr3_196199643_196230639_RNF168_NM_-|	61.2462	-2.18409	1.0453	-2.08943	0.0366691	0.340324	0	3.26268	2.27974	5.29612	9.85114	153.135	107.669	116.267	99.567	115.135	1.25101	5.26545	-1.83223	0.241228	-2.07346	RNF168	chr3:196223085:-	chr3_196496215_-
chr3:150909163-150909214:mpeak_60276|chr3_150804584_151150539_MED12L_NM_+|	10.498	-3.57306	1.81826	-1.9651	0.0494026	NA	0	0	0	2.11845	6.15696	11.0967	21.7512	22.7974	20.1253	20.9337	0	12.9594	-Inf	-0.374064	-Inf	MED12L	chr3:150909215:+	chr3_151191425_+
chr3:125311546-125311603:mpeak_59359|chr3_125249424_125314381_OSBPL11_NM_-|	27.445	-2.44224	1.11865	-2.18321	0.0290205	0.310604	0	3.26268	2.27974	4.2369	8.00405	51.0448	85.9173	41.0353	34.9544	43.7144	2.38218	12.1305	-1.56902	0.779268	-2.34828	OSBPL11	chr3:125311548:-	chr3_125592709_-
chr22:38942899-38942954:mpeak_55606|chr22_38916094_38966201_DMC1_NM_-|	5.11026	-3.9103	1.78175	-2.19464	0.0281892	NA	0	2.17512	4.55947	6.35534	8.00405	5.54835	13.0507	9.11895	1.05922	1.23139	11.6948	165.816	-2.53569	1.28995	-3.82565	DMC1	chr22:38942903:-	chr22_38546899_-
chr21:48077872-48077938:mpeak_54650|chr21_48055506_48084206_PRMT2_NM_+|	152.429	-1.62721	0.737665	-2.20589	0.0273916	0.302512	11.0967	2.17512	20.5176	9.53301	29.5534	287.405	293.641	253.051	308.234	309.08	2.28413	6.84817	-1.58208	0.0019956	-1.58408	PRMT2	chr21:48077935:+	chr21_46658013_+
chr21:48056333-48056467:mpeak_54644|chr21_48055506_48084206_PRMT2_NM_+|	277.533	-0.708011	0.315972	-2.24074	0.0250427	0.290968	162.012	221.862	302.065	306.116	331.86	287.405	293.641	253.051	308.234	309.08	66.0661	108.005	-0.707127	0.0019956	-0.709123	PRMT2	chr21:48056459:+	chr21_46636475_+;chr21_46636545_+
chr21:45460976-45461030:mpeak_54432|chr21_45432205_45523173_TRAPPC10_NM_+|	101.895	-2.29522	0.783256	-2.93036	0.00338569	0.18253	3.32901	3.26268	6.83921	20.1253	10.4668	197.521	256.664	172.12	188.542	160.081	1.45132	7.18806	-1.92056	0.387673	-2.30823	TRAPPC10	chr21:45461031:+	chr21_44041149_+
chr21:40668324-40668528:mpeak_54199|chr21_40569341_40685712_BRWD1_NM_-|	282.056	-1.93292	0.536449	-3.60318	0.000314353	0.0719974	36.6191	55.4656	100.308	208.667	153.308	411.688	567.707	387.555	391.913	507.334	9.40221	35.925	-1.74278	0.191135	-1.93392	BRWD1	chr21:40668329:-;chr21:40668363:-;chr21:40668409:-;chr21:40668477:-	chr21_39296453_-;chr21_39296486_-
chr21:34896312-34896430:mpeak_53974|chr21_34876622_34915198_GART_NM_-|	68.0181	-1.15988	0.576259	-2.01278	0.0441376	0.368415	9.98703	13.0507	22.7974	36.0136	38.1732	75.4576	117.457	119.686	113.337	134.222	11.942	26.4086	-1.48879	-0.343821	-1.14496	GART	chr21:34896316:-	chr21_33524012_-;chr21_33524075_-;chr21_33524116_-
chr20:61559970-61560087:mpeak_53510|chr20_61513766_61569304_DIDO1_NM_-|	42.08	-1.73928	0.817659	-2.12715	0.0334076	0.32714	2.21934	6.52537	10.2588	18.0068	13.5453	97.651	54.3781	87.7699	76.2641	54.1813	5.752	19.1604	-1.67244	0.0635576	-1.73599	DIDO1	chr20:61559973:-;chr20:61560035:-	chr20_62928622_-;chr20_62928685_-
chr20:40125454-40125509:mpeak_52390|chr20_40034129_40247133_CHD6_NM_-|	31.5514	-4.5621	1.65901	-2.74989	0.00596148	0.199656	0	0	0	8.47379	3.69418	55.4835	77.2168	66.1124	61.435	43.0987	0	7.13053	-Inf	0.222127	-Inf	CHD6	chr20:40125453:-	chr20_41496814_-
chr20:17951027-17951179:mpeak_51707|chr20_17949761_17970581_MGME1_NM_+|	72.4885	-2.38565	0.93879	-2.54119	0.0110476	0.219046	2.21934	2.17512	9.11895	13.7699	25.2435	120.954	90.2676	173.26	122.87	165.007	2.0805	10.4378	-2.86829	-0.541474	-2.32681	MGME1	chr20:17951084:+;chr20:17951180:+	chr20_17970439_+;chr20_17970531_+
chr2:25798190-25798252:mpeak_45207|chr2_25600422_25896516_DTNB_NM_-|	19.8844	-2.33697	0.865359	-2.70058	0.00692177	0.203115	3.32901	3.26268	5.69934	13.7699	12.3139	35.5095	45.6776	23.9372	30.7175	24.6279	8.11915	40.0885	-1.68458	0.619208	-2.30379	DTNB	chr2:25798193:-	chr2_25575327_-
chr2:240321539-240321589:mpeak_51107|chr2_239974832_240322643_HDAC4_NM_-|	5.28635	-4.19426	1.7992	-2.33118	0.0197437	NA	0	0	6.83921	3.17767	2.46279	8.87736	6.52537	9.11895	8.47379	7.38836	0	49.9564	-Inf	-0.112688	-Inf	HDAC4	chr2:240321542:-	chr2_239399809_-;chr2_239399834_-
chr2:158687713-158687766:mpeak_48855|chr2_158594177_158732374_ACVR1_NM_-|	18.272	-4.16132	1.9316	-2.15434	0.0312135	0.31824	0	0	0	0	7.38836	32.1804	47.8527	25.0771	33.8952	36.3261	0	7.75287	-Inf	0.333109	-Inf	ACVR1	chr2:158687712:-	-
chr2:149502269-149502323:mpeak_48672|chr2_149402559_149543873_EPC2_NM_+|	61.3965	-2.12916	0.859678	-2.47669	0.0132607	0.226587	1.10967	4.35024	6.83921	10.5922	8.61975	109.857	169.66	83.2104	102.745	116.982	1.95334	8.59953	-1.66944	0.468878	-2.13832	EPC2	chr2:149502323:+	chr2_148744752_+
chr2:136500664-136500986:mpeak_48476|chr2_136499188_136540318_UBXN4_NM_+|	105.157	-1.42103	0.675064	-2.10503	0.0352887	0.335549	6.65802	5.43781	18.2379	18.0068	6.77266	208.618	232.738	176.68	183.246	195.176	2.74061	7.74946	-1.24545	0.254155	-1.4996	UBXN4	chr2:136500788:+;chr2:136500922:+;chr2:136500975:+	chr2_135743216_+;chr2_135743397_+
chr2:111408674-111408728:mpeak_47852|chr2_111395736_111435684_BUB1_NM_-|	17.4472	-3.67089	1.75695	-2.08935	0.0366759	0.340324	0	0	1.13987	11.6515	3.07848	22.1934	17.401	27.3568	49.7835	41.8673	0	13.3351	-Inf	-1.00272	-Inf	BUB1	chr2:111408678:-	chr2_110651101_-
chr2:101635004-101635144:mpeak_47594|chr2_101624735_101767846_TBC1D8_NM_-|	18.3996	-3.6279	1.81989	-1.99347	0.0462103	0.374939	0	0	6.83921	0	2.46279	15.5354	46.7651	45.5947	36.0136	30.7848	0	8.2763	-Inf	-0.266276	-Inf	TBC1D8	chr2:101635003:-	chr2_101018542_-
chr19:58791471-58791531:mpeak_44547|chr19_58790317_58805463_ZNF8_NM_+|	10.7517	-3.46494	1.7185	-2.01626	0.0437729	NA	1.10967	0	5.69934	5.29612	3.07848	19.9741	23.9263	18.2379	7.41457	22.7808	2.5277	29.0584	-3.07986	0.4432	-3.52306	ZNF8	chr19:58791529:+	chr19_58280157_+
chr19:49711838-49711896:mpeak_43699|chr19_49661015_49714750_TRPM4_NM_+|	11.7454	-4.33243	1.7808	-2.43286	0.0149803	NA	0	0	0	4.2369	3.69418	21.0837	32.6268	15.9582	27.5398	12.3139	0	14.2104	-Inf	0.529596	-Inf	TRPM4	chr19:49711890:+	chr19_49208630_+
chr19:41823120-41823332:mpeak_43092|chr19_41816093_41828499_CCDC97_NM_+|	46.1401	-2.4653	1.21043	-2.03671	0.0416787	0.359731	0	2.17512	3.4196	5.29612	3.69418	104.309	117.457	64.9725	98.5078	61.5696	0.98082	5.51429	-1.92736	0.563753	-2.49111	CCDC97	chr19:41823239:+	chr19_41317332_+
chr19:24246370-24246427:mpeak_42386|chr19_24216206_24309055_ZNF254_NM_+|	15.159	-3.07005	1.38031	-2.22417	0.0261367	0.297172	1.10967	1.08756	6.83921	1.05922	3.69418	33.2901	52.2029	19.3778	9.53301	23.3965	2.57007	22.1625	-1.81448	1.29376	-3.10824	ZNF254	chr19:24246430:+	chr19_24063613_+
chr19:21559223-21559278:mpeak_42218|chr19_21541734_21560190_ZNF738_NR_+|	29.6255	-4.29598	1.66501	-2.58015	0.0098757	0.209975	0	0	3.4196	2.11845	7.38836	31.0708	71.779	54.7137	70.968	54.797	0	7.16229	-Inf	-0.226327	-Inf	ZNF738	chr19:21559279:+	-
chr19:16967857-16967919:mpeak_41888|chr19_16940197_16989307_SIN3B_NM_+|	90.762	-1.37984	0.701197	-1.96784	0.0490863	0.388294	2.21934	7.61293	11.3987	8.47379	10.4668	195.302	201.199	168.701	182.187	120.061	2.47976	6.44218	-1.04063	0.336719	-1.37735	SIN3B	chr19:16967914:+	chr19_16857105_+
chr19:16629372-16629433:mpeak_41853|chr19_16607121_16630904_C19orf44_NM_+|	4.74465	-3.77411	1.77154	-2.13041	0.033138	NA	2.21934	0	4.55947	6.35534	11.0825	11.0967	2.17512	1.13987	6.35534	2.46279	16.7222	220.901	-2.72416	0.999402	-3.72357	C19orf44	chr19:16629430:+	chr19_16518617_+
chr19:15357788-15357973:mpeak_41778|chr19_15349256_15391262_BRD4_NM_-|	316.64	-1.94046	0.816418	-2.3768	0.0174636	0.251499	436.1	708.002	576.773	745.694	677.266	9.98703	5.43781	0	5.29612	1.84709	7417.27	27994.9	-0.220628	1.69557	-1.9162	BRD4	chr19:15357787:-;chr19:15357858:-;chr19:15357891:-	chr19_15246977_-;chr19_15247048_-;chr19_15247093_-
chr17:9086940-9086990:mpeak_35148|chr17_8924858_9142956_NTN1_NM_+|	44.4488	-3.38899	1.59519	-2.12451	0.0336278	0.328653	1.10967	0	3.4196	5.29612	2.46279	82.1156	142.47	66.1124	68.8495	72.6522	0.494096	5.38427	-2.74756	0.698327	-3.44589	NTN1	chr17:9086988:+	chr17_9183669_+
chr17:8927393-8927443:mpeak_35147|chr17_8924858_9142956_NTN1_NM_+|	44.4408	-3.38847	1.60179	-2.11543	0.0343935	0.331528	1.10967	0	2.27974	6.35534	2.46279	82.1156	142.47	66.1124	68.8495	72.6522	0.494096	5.34543	-2.73712	0.698327	-3.43544	NTN1	chr17:8927445:+	chr17_9024126_+
chr17:7588565-7588633:mpeak_35013|chr17_7573008_7590868_TP53_NM_-|	179.93	-2.62654	0.77032	-3.40968	0.000650402	0.0970503	5.54835	3.26268	14.8183	22.2437	35.7104	276.308	446.988	306.625	291.287	396.508	1.21818	7.31808	-2.46104	0.125693	-2.58674	TP53	chr17:7588533:-;chr17:7588567:-	chr17_7685235_-
chr17:65956438-65956536:mpeak_38364|chr17_65821779_65978367_BPTF_NM_+|	71.2558	-2.1661	0.890883	-2.43141	0.0150403	0.236241	2.21934	2.17512	10.2588	8.47379	7.38836	118.735	178.36	113.987	139.818	131.143	1.47915	6.78559	-1.98649	0.211223	-2.19771	BPTF	chr17:65956491:+	chr17_67960374_+
chr17:57062089-57062186:mpeak_37521|chr17_57060282_57184266_TRIM37_NM_-|	59.787	-2.6321	1.21465	-2.16696	0.0302376	0.315533	3.32901	0	0	13.7699	6.15696	115.406	175.097	85.4901	103.804	94.8172	1.14595	7.01376	-1.99659	0.61706	-2.61365	TRIM37	chr17:57062130:-	-
chr17:55351779-55351857:mpeak_37365|chr17_55333930_55756909_MSI2_NM_+|	127.708	-1.38063	0.671064	-2.05737	0.0396508	0.352484	194.192	189.236	176.68	301.879	123.139	82.1156	101.143	20.5176	37.0728	51.1028	209.228	553.574	-0.0651207	1.33858	-1.4037	MSI2	chr17:55351850:+	chr17_57274485_+
chr17:48944625-48944676:mpeak_37233|chr17_48944039_48944856_TOB1-AS1_NR_+|	14.458	-5.27725	1.69966	-3.10489	0.00190351	0.143775	0	0	4.55947	0	6.77266	39.9481	34.802	20.5176	20.1253	17.8552	0	19.3718	-Inf	0.938649	-Inf	TOB1-AS1	chr17:48944678:+	chr17_50867314_+
chr17:45993023-45993073:mpeak_37028|chr17_45973515_46005089_SP2_NM_+|	31.9156	-3.78951	1.58462	-2.39144	0.0167825	0.247105	0	0	2.27974	5.29612	2.46279	57.7029	55.4656	59.2732	72.0272	64.6481	0	5.1231	-Inf	-0.20704	-Inf	SP2	chr17:45993078:+	chr17_47915727_+
chr16:71494747-71494812:mpeak_33445|chr16_71483788_71496155_ZNF23_NM_-|	20.9804	-2.35719	1.17112	-2.01276	0.0441398	0.368415	0	3.26268	3.4196	6.35534	10.4668	27.7418	54.3781	35.3359	42.369	26.4749	3.97308	19.4297	-2.04824	0.241689	-2.28993	ZNF23	chr16:71494758:-	chr16_71460859_-
chr16:3181662-3181730:mpeak_31011|chr16_3175967_3184883_ZNF213-AS1_NR_-|	10.2129	-2.55665	1.15364	-2.21617	0.02668	NA	11.0967	7.61293	25.0771	8.47379	9.85114	9.98703	18.4885	2.27974	7.41457	1.84709	65.7041	376.055	-0.629019	1.88787	-2.51689	ZNF213-AS1	chr16:3181669:-	chr16_3131656_-
chr16:3178829-3178887:mpeak_31009|chr16_3175967_3184883_ZNF213-AS1_NR_-|	7.68844	-3.31299	1.18248	-2.80173	0.00508298	NA	2.21934	5.43781	7.97908	9.53301	11.6982	9.98703	18.4885	2.27974	7.41457	1.84709	26.8902	253.092	-1.34664	1.88787	-3.23451	ZNF213-AS1	chr16:3178834:-	chr16_3128836_-
chr16:24960440-24960507:mpeak_32057|chr16_24931581_25026699_ARHGAP17_NM_-|	43.9932	-3.41552	1.5889	-2.14961	0.0315859	0.318594	0	1.08756	1.13987	8.47379	3.69418	103.199	96.7929	94.6091	65.6719	65.2638	0.543802	5.90031	-3.02815	0.411493	-3.43964	ARHGAP17	chr16:24960449:-	-
chr15:93445472-93445630:mpeak_30396|chr15_93443550_93567601_CHD2_NM_+|	40.1683	-2.77742	1.21627	-2.28356	0.0223975	0.278704	2.21934	1.08756	6.83921	25.4214	5.54127	44.3868	92.4427	69.532	81.5602	72.6522	2.4168	16.8951	-2.92994	-0.124509	-2.80543	CHD2	chr15:93445524:+;chr15:93445632:+	chr15_92902294_+;chr15_92902419_+
chr15:75805032-75805102:mpeak_29789|chr15_75761324_75871632_PTPN9_NM_-|	43.4994	-1.74219	0.629948	-2.76562	0.00568151	0.197157	8.87736	16.3134	11.3987	29.6583	26.4749	94.322	94.6178	50.1542	50.8427	52.3342	13.3327	44.0432	-0.837711	0.886238	-1.72395	PTPN9	chr15:75805037:-	chr15_75512678_-
chr15:67974391-67974453:mpeak_29490|chr15_67835020_68098983_MAP2K5_NM_+|	25.7688	-3.9557	1.71086	-2.31211	0.0207715	0.269655	0	0	1.13987	0	6.77266	47.7158	52.2029	45.5947	59.3165	44.9458	0	5.28005	-Inf	0.000202574	-Inf	MAP2K5	chr15:67974443:+	chr15_67682121_+
chr15:65972969-65973026:mpeak_29380|chr15_65954325_66084631_DENND4A_NM_-|	8.21367	-4.41748	1.80178	-2.45173	0.014217	NA	0	0	1.13987	4.2369	4.92557	11.0967	20.6637	20.5176	8.47379	11.0825	0	25.7083	-Inf	0.249525	-Inf	DENND4A	chr15:65972976:-	chr15_65680641_-
chr15:41581293-41581426:mpeak_28117|chr15_41576200_41590238_OIP5-AS1_NR_+|	89.3754	-1.49513	0.580601	-2.57514	0.0100201	0.21109	7.76769	6.52537	14.8183	18.0068	17.8552	167.56	197.936	169.84	130.285	163.16	3.91059	10.9393	-1.24115	0.242921	-1.48407	OIP5-AS1	chr15:41581353:+	chr15_41289101_+;chr15_41289169_+
chr15:41550719-41550772:mpeak_28112|chr15_41523436_41571533_CHP1_NM_+|	79.0396	-1.82849	0.906826	-2.01637	0.0437617	0.367566	4.43868	0	11.3987	5.29612	8.61975	166.451	123.982	152.742	183.246	134.222	1.5283	5.38367	-1.9268	-0.110139	-1.81666	CHP1	chr15:41550772:+	chr15_41258573_+
chr14:92504990-92505050:mpeak_27013|chr14_92436237_92506403_TRIP11_NM_-|	41.4922	-2.28724	0.779747	-2.9333	0.00335375	0.182029	1.10967	7.61293	18.2379	21.1845	12.3139	73.2382	89.18	49.0143	78.3826	64.6481	5.37045	26.9397	-1.98338	0.343232	-2.32662	TRIP11	chr14:92504996:-	chr14_92038643_-
chr14:68249002-68249052:mpeak_26128|chr14_68215356_68283306_ZFYVE26_NM_-|	14.5637	-4.42288	1.92093	-2.30247	0.0213088	0.272375	0	0	0	0	6.15696	36.6191	39.1522	14.8183	21.1845	27.7063	0	9.66418	-Inf	0.835115	-Inf	ZFYVE26	chr14:68249001:-	-
chr14:68226368-68226424:mpeak_26124|chr14_68215356_68283306_ZFYVE26_NM_-|	15.7522	-3.14639	1.30267	-2.41535	0.0157201	0.243256	2.21934	0	5.69934	2.11845	8.00405	36.6191	39.1522	14.8183	21.1845	27.7063	2.929	24.8345	-2.24875	0.835115	-3.08387	ZFYVE26	chr14:68226369:-	chr14_67759653_-
chr14:51388804-51388858:mpeak_25331|chr14_51372274_51411248_PYGL_NM_-|	42.4868	-4.27873	1.64016	-2.60872	0.00908808	0.206791	0	0	2.27974	2.11845	11.6982	62.1415	61.991	95.7489	87.9156	100.974	0	5.65503	-Inf	-0.612288	-Inf	PYGL	chr14:51388802:-	chr14_50922086_-
chr14:51131150-51131211:mpeak_25303|chr14_51102102_51135071_SAV1_NM_-|	107.928	-1.62344	0.557462	-2.9122	0.00358898	0.18265	8.87736	7.61293	18.2379	33.8952	24.0122	211.947	182.71	199.477	213.963	178.552	4.17838	12.8625	-1.62217	-1.4926e-05	-1.62216	SAV1	chr14:51131151:-	chr14_50664418_-
chr14:23754304-23754364:mpeak_24562|chr14_23746396_23755309_HOMEZ_NM_-|	61.9224	-1.4109	0.652193	-2.16332	0.0305164	0.316676	9.98703	16.3134	9.11895	21.1845	28.9377	160.902	123.982	78.6509	85.7971	84.3504	9.23198	23.8109	-0.58655	0.780361	-1.36691	HOMEZ	chr14:23754309:-	chr14_23285102_-
chr14:104211824-104211874:mpeak_27586|chr14_104201532_104313927_PPP1R13B_NM_-|	19.4538	-3.90002	1.61137	-2.42031	0.0155071	0.240657	0	0	4.55947	4.2369	3.07848	32.1804	30.4517	50.1542	36.0136	33.8633	0	9.89314	-Inf	-0.353471	-Inf	PPP1R13B	chr14:104211822:-	-
chr14:104204761-104204811:mpeak_27585|chr14_104201532_104313927_PPP1R13B_NM_-|	18.9707	-3.40866	1.68	-2.02897	0.0424615	0.363125	0	0	0	2.11845	4.92557	32.1804	30.4517	50.1542	36.0136	33.8633	0	5.86849	-Inf	-0.353471	-Inf	PPP1R13B	chr14:104204796:-	chr14_103738459_-
chr14:104163410-104163537:mpeak_27572|chr14_104095524_104167537_KLC1_NM_+|	173.05	-1.40474	0.439443	-3.19663	0.00139044	0.126212	83.2253	85.9173	212.015	237.266	208.721	147.586	218.6	131.085	221.378	184.709	46.1904	122.494	-1.37489	0.0321561	-1.40705	KLC1	chr14:104163489:+	chr14_103697151_+
chr14:104161882-104161981:mpeak_27570|chr14_104095524_104167537_KLC1_NM_+|	94.2466	-1.70483	0.849738	-2.0063	0.0448247	0.369955	3.32901	3.26268	17.098	7.41457	8.00405	147.586	218.6	131.085	221.378	184.709	1.80009	6.05331	-1.71749	0.0321561	-1.74965	KLC1	chr14:104161984:+	chr14_103695657_+
chr13:67775144-67775203:mpeak_23650|chr13_66879160_67804468_PCDH9_NM_-|	17.3182	-3.31633	1.38821	-2.38893	0.0168977	0.24753	1.10967	1.08756	3.4196	20.1253	10.4668	16.6451	36.9771	20.5176	33.8952	28.9377	4.09762	40.8056	-3.36731	-0.0514001	-3.31591	PCDH9	chr13:67775147:-	chr13_67201016_-
chr13:53039892-53039985:mpeak_23582|chr13_53029494_53049029_CKAP2_NM_+|	55.0697	-2.58873	1.19798	-2.16092	0.0307014	0.316676	0	2.17512	4.55947	18.0068	9.85114	84.335	65.2537	100.308	138.758	127.449	1.45407	8.84475	-3.31264	-0.707913	-2.60473	CKAP2	chr13:53039945:+;chr13:53039978:+	chr13_52465772_+;chr13_52465842_+
chr13:48561770-48561826:mpeak_23348|chr13_48517580_48575462_SUCLA2_NM_-|	22.4471	-3.42889	1.72028	-1.99321	0.0462382	0.374939	0	0	2.27974	2.11845	3.69418	19.9741	53.2905	42.1751	64.6127	36.3261	0	5.65449	-Inf	-0.381014	-Inf	SUCLA2	chr13:48561769:-	chr13_47987635_-
chr13:42452807-42452959:mpeak_23117|chr13_42142441_42535221_VWA8_NM_-|	11.8751	-4.79968	1.75757	-2.73085	0.00631706	NA	0	0	3.4196	2.11845	6.77266	27.7418	21.7512	25.0771	8.47379	23.3965	0	21.6177	-Inf	0.382558	-Inf	VWA8	chr13:42452908:-	chr13_41878773_-
chr12:80082130-80082184:mpeak_20220|chr12_79986473_80084790_PAWR_NM_-|	103.156	-1.45118	0.716168	-2.02632	0.0427322	0.363936	4.43868	4.35024	13.6784	14.8291	12.3139	163.122	202.286	193.778	262.688	160.081	2.40524	6.62099	-1.63061	-0.169739	-1.46087	PAWR	chr12:80082131:-	chr12_79688353_-
chr12:50028551-50028606:mpeak_18686|chr12_50017196_50037882_PRPF40B_NM_+|	19.1296	-4.73746	1.73843	-2.72513	0.00642765	0.200035	0	0	10.2588	5.29612	1.84709	34.3998	34.802	18.2379	47.6651	38.7889	0	16.6221	-Inf	-0.0123062	-Inf	PRPF40B	chr12:50028604:+	chr12_49634775_+;chr12_49634819_+
chr12:31604611-31604695:mpeak_18100|chr12_31540720_31743952_DENND5B_NM_-|	11.8636	-4.04903	1.70266	-2.37806	0.0174041	NA	0	1.08756	3.4196	4.2369	8.00405	31.0708	22.8388	7.97908	19.066	20.9337	2.01738	32.6406	-3.263	0.753107	-4.01611	DENND5B	chr12:31604614:-;chr12:31604656:-	chr12_31451680_-
chr12:31239287-31239349:mpeak_18080|chr12_31226778_31256740_DDX11_NM_+|	49.5979	-1.64294	0.805802	-2.03889	0.0414614	0.359212	1.10967	5.43781	15.9582	7.41457	10.4668	77.6769	95.7054	84.3503	112.278	85.5818	3.77632	11.9909	-1.78474	-0.117849	-1.66689	DDX11	chr12:31239342:+	chr12_31086372_+;chr12_31086406_+
chr12:133088464-133088566:mpeak_22195|chr12_133067156_133159556_FBRSL1_NM_+|	125.529	-0.927569	0.466685	-1.98757	0.0468594	0.378585	18.8644	20.6637	29.6366	29.6583	19.7023	272.979	288.204	215.435	163.12	197.023	7.04371	13.7248	-0.413961	0.54842	-0.962381	FBRSL1	chr12:133088538:+;chr12:133088564:+	chr12_132511951_+;chr12_132511991_+
chr12:123012176-123012228:mpeak_21829|chr12_123011808_123110751_KNTC1_NM_+|	14.8636	-3.74373	1.68436	-2.22264	0.02624	0.297395	0	0	1.13987	6.35534	2.46279	19.9741	29.3641	37.6157	26.4806	25.2435	0	11.1462	-Inf	-0.271635	-Inf	KNTC1	chr12:123012227:+	chr12_122527673_+
chr12:109690328-109690379:mpeak_21017|chr12_109577201_109704040_ACACB_NM_+|	18.0128	-4.50627	1.71704	-2.62444	0.0086792	0.205129	0	0	2.27974	8.47379	3.07848	46.6062	20.6637	26.217	44.4874	28.322	0	13.968	-Inf	0.0271086	-Inf	ACACB	chr12:109690383:+	chr12_109252574_+
chr12:102295779-102295896:mpeak_20733|chr12_102271104_102314993_DRAM1_NM_+|	340.065	-0.988614	0.411814	-2.40063	0.0163667	0.247105	14.4257	27.189	29.6366	31.7767	26.4749	785.647	809.145	545.997	530.671	599.688	2.60941	5.24281	-0.493613	0.513002	-1.00661	DRAM1	chr12:102295891:+	chr12_101902110_+
chr11:82869726-82869941:mpeak_15896|chr11_82868136_82895720_PCF11_NM_+|	119.953	-0.853213	0.41452	-2.05832	0.0395598	0.352255	31.0708	33.7144	55.8535	45.5466	51.7185	237.469	187.061	213.155	183.246	160.697	15.2604	27.4851	-0.655952	0.192898	-0.84885	PCF11	chr11:82869878:+;chr11:82869921:+	chr11_83158836_+;chr11_83158893_+
chr11:68119858-68119926:mpeak_15282|chr11_68080076_68216276_LRP5_NM_+|	54.8016	-2.6245	1.18811	-2.20896	0.0271775	0.301856	2.21934	0	7.97908	2.11845	4.30987	133.16	127.245	93.4692	104.863	72.6522	0.852265	5.31669	-2.11364	0.52751	-2.64115	LRP5	chr11:68119909:+	chr11_68352440_+
chr11:63916078-63916265:mpeak_14795|chr11_63766159_63933585_MACROD1_NM_-|	47.9548	-1.11116	0.522227	-2.12774	0.0333583	0.326954	47.7158	33.7144	47.8745	56.1389	62.1853	63.2512	55.4656	28.4967	50.8427	33.8633	68.592	146.815	-0.44431	0.653578	-1.09789	MACROD1	chr11:63916090:-;chr11:63916168:-;chr11:63916216:-	chr11_64148745_-
chr11:47856782-47856835:mpeak_14319|chr11_47800746_47870057_NUP160_NM_-|	31.8146	-4.43748	1.57681	-2.81421	0.0048897	0.194884	0	0	5.69934	2.11845	6.15696	48.8255	65.2537	68.3921	65.6719	56.0284	0	7.35156	-Inf	-0.151703	-Inf	NUP160	chr11:47856783:-	chr11_47835232_-
chr11:33162953-33163267:mpeak_13919|chr11_33106835_33183037_CSTF3_NM_-|	108.616	-0.825141	0.399225	-2.06686	0.0387478	0.348768	55.4835	40.2398	103.728	102.745	80.6562	116.515	145.733	134.504	155.706	150.846	36.501	65.1003	-0.999795	-0.165064	-0.83473	CSTF3	chr11:33162977:-;chr11:33163048:-;chr11:33163201:-	chr11_33141432_-;chr11_33141488_-;chr11_33141542_-
chr11:32997125-32997175:mpeak_13898|chr11_32914723_32997879_QSER1_NM_+|	49.4944	-5.61029	1.64395	-3.41268	0.000643269	0.0970503	0	0	4.55947	15.8884	3.07848	100.98	119.632	72.9516	76.2641	101.59	0	9.3803	-Inf	0.399903	-Inf	QSER1	chr11:32997176:+	chr11_32975604_+;chr11_32975629_+
chr11:126163077-126163134:mpeak_16951|chr11_126152981_126163562_TIRAP_NM_+|	11.5058	-2.66326	0.893465	-2.98082	0.00287476	NA	4.43868	9.78805	6.83921	14.8291	9.85114	25.5224	26.1015	4.55947	6.35534	6.77266	27.5584	178.202	-0.562677	2.13027	-2.69295	TIRAP	chr11:126163131:+	chr11_126293235_+
chr11:108100037-108100092:mpeak_16371|chr11_108093558_108236051_ATM_NM_+|	11.6068	-4.47013	1.69457	-2.63792	0.00834172	NA	0	0	4.55947	10.5922	3.07848	14.4257	18.4885	23.9372	24.3621	16.6238	0	28.0796	-Inf	-0.395059	-Inf	ATM	chr11:108100091:+	chr11_108229364_+
chr10:77162322-77162373:mpeak_11122|chr10_77161285_77167012_ZNF503-AS2_NR_+|	6.68841	-4.64475	1.91326	-2.42766	0.0151967	NA	0	0	3.4196	5.29612	4.30987	16.6451	6.52537	15.9582	11.6515	3.07848	0	42.4451	-Inf	0.179568	-Inf	ZNF503-AS2	chr10:77162373:+	chr10_75402614_+
chr10:34732360-34732410:mpeak_10058|chr10_34400490_35104253_PARD3_NM_-|	28.1682	-4.1169	1.62313	-2.53639	0.0112001	0.219841	0	0	1.13987	2.11845	5.54127	52.1545	60.9034	49.0143	45.5466	65.2638	0	5.50577	-Inf	0.0855337	-Inf	PARD3	chr10:34732362:-	chr10_34443437_-
chr10:134540767-134540859:mpeak_12994|chr10_134351352_134595540_INPP5A_NM_+|	296.764	-2.07015	0.482737	-4.28837	1.79993e-05	0.0324017	14.4257	7.61293	20.5176	16.9476	14.7767	914.368	948.353	323.723	351.662	355.257	1.18314	5.06887	-0.66021	1.43883	-2.09904	INPP5A	chr10:134540818:+;chr10:134540853:+	-
chr10:127490603-127490712:mpeak_12847|chr10_127477574_127511837_UROS_NM_-|	64.8031	-1.06387	0.417313	-2.54932	0.0107932	0.215884	33.2901	48.9402	42.1751	45.5466	44.3301	120.954	123.982	60.413	69.9088	58.4911	33.5722	69.9379	-0.0983993	0.96041	-1.05881	UROS	chr10:127490626:-	chr10_125802058_-
chr10:127480077-127480147:mpeak_12846|chr10_127477574_127511837_UROS_NM_-|	61.3927	-1.17913	0.447592	-2.63438	0.00842904	0.203161	25.5224	40.2398	42.1751	32.8359	39.4046	120.954	123.982	60.413	69.9088	58.4911	26.8487	60.5973	-0.213992	0.96041	-1.1744	UROS	chr10:127480089:-	chr10_125791502_-;chr10_125791536_-
chr10:11601496-11601564:mpeak_9290|chr10_11505848_11653788_USP6NL_NM_-|	28.3852	-3.55563	1.62879	-2.18299	0.0290367	0.310604	0	1.08756	1.13987	8.47379	2.46279	56.5932	85.9173	41.0353	43.4282	43.7144	0.763144	9.42163	-2.88806	0.737884	-3.62595	USP6NL	chr10:11601513:-	chr10_11559515_-
chr10:101514501-101514599:mpeak_11882|chr10_101491957_101515381_CUTC_NM_+|	34.954	-2.42837	1.00661	-2.41244	0.0158463	0.244179	1.10967	2.17512	10.2588	10.5922	13.5453	46.6062	57.6407	77.511	78.3826	51.7185	3.15097	16.5676	-2.80342	-0.408924	-2.3945	CUTC	chr10:101514505:+;chr10:101514598:+	chr10_99754749_+;chr10_99754797_+;chr10_99754839_+
chr1:116207338-116207411:mpeak_4368|chr1_116184573_116233739_VANGL1_NM_+|	244.394	-1.04385	0.477631	-2.18548	0.0288535	0.31047	33.2901	29.3641	55.8535	38.1321	35.7104	464.952	665.587	353.359	326.241	441.454	5.54198	11.5691	-0.464687	0.597117	-1.0618	VANGL1	chr1:116207390:+	chr1_115664768_+
chr8:53619923-53620063:mpeak_80361|chr8_53536419_53627026_RB1CC1_NM_-|	26.9198	-4.00496	1.67381	-2.39272	0.0167238	0.247105	0	0	0	8.47379	2.46279	47.7158	50.0278	41.0353	60.3758	59.1068	0	6.81331	-Inf	-0.130697	-Inf	RB1CC1	-	chr8_52707337_-;chr8_52707461_-
chr7:135069772-135069914:mpeak_78499|chr7_135047938_135194875_CNOT4_NM_-|	36.6855	-2.51272	1.05359	-2.38492	0.0170827	0.249338	0	3.26268	12.5386	3.17767	8.61975	61.0319	87.0049	63.8326	57.1981	70.1894	2.20397	12.7267	-2.314	0.215684	-2.52968	CNOT4	-	chr7_135385020_-
chr4:69188116-69188591:mpeak_63208|chr4_69180041_69215824_YTHDC1_NM_-|	159.544	-1.05811	0.524926	-2.01573	0.0438279	0.367566	9.98703	8.70049	17.098	10.5922	18.4709	351.766	339.319	273.568	306.116	259.824	2.70409	5.4986	-0.719641	0.304281	-1.02392	YTHDC1	-	chr4_68322399_-
chr4:107238091-107238282:mpeak_64155|chr4_107236766_107268682_AIMP1_NM_+|	101.104	-1.55952	0.680954	-2.29021	0.0220093	0.277804	5.54835	6.52537	12.5386	9.53301	22.1651	184.205	231.651	148.183	194.897	195.791	2.90334	8.20912	-1.28841	0.211105	-1.49951	AIMP1	-	chr4_106317061_+
chr20:21317565-21317772:mpeak_51816|chr20_21283941_21369910_XRN2_NM_+|	18.5404	-4.32464	2.06006	-2.09928	0.0357925	0.33729	0	0	0	0	9.85114	27.7418	46.7651	38.7555	29.6583	32.6319	0	9.74919	-Inf	0.1454	-Inf	XRN2	-	chr20_21337043_+
chr2:65627842-65627895:mpeak_46510|chr2_65541303_65659656_SPRED2_NM_-|	38.2388	-4.06429	1.56478	-2.59736	0.0093943	0.209033	0	0	5.69934	3.17767	3.07848	69.9092	67.4288	84.3503	77.3233	71.4208	0	5.12904	-Inf	-0.178221	-Inf	SPRED2	-	chr2_65400703_-
chr2:39274080-39274172:mpeak_45803|chr2_39213456_39347604_SOS1_NM_-|	38.1719	-3.17404	1.58173	-2.00668	0.0447834	0.369955	1.10967	0	3.4196	4.2369	8.00405	74.3479	60.9034	96.8888	73.0864	59.7225	0.820451	6.81789	-3.23397	-0.179132	-3.05484	SOS1	-	chr2_39046939_-
chr2:168986057-168986122:mpeak_49081|chr2_168812080_169104105_STK39_NM_-|	40.9001	-3.3962	1.61207	-2.10673	0.0351412	0.335549	0	1.08756	5.69934	6.35534	1.84709	75.4576	110.931	87.7699	65.6719	54.1813	0.583491	6.69568	-3.09114	0.429311	-3.52045	STK39	-	chr2_168129548_-
chr19:15366883-15367079:mpeak_41781|chr19_15349256_15391262_BRD4_NM_-|	127.472	-1.63059	0.773067	-2.10925	0.0349232	0.335002	233.031	287.116	209.736	267.984	254.283	9.98703	5.43781	0	5.29612	1.84709	3372.14	10247.5	0.0920341	1.69557	-1.60354	BRD4	-	chr19_15256072_-;chr19_15256126_-;chr19_15256191_-
chr18:52593178-52593256:mpeak_40257|chr18_52571646_52626739_CCDC68_NM_-|	14.705	-4.43387	1.66523	-2.66263	0.00775335	0.203115	0	0	4.55947	5.29612	6.15696	16.6451	29.3641	17.098	32.8359	35.0947	0	18.832	-Inf	-0.301064	-Inf	CCDC68	-	chr18_54925942_-
chr17:55351955-55352025:mpeak_37366|chr17_55333930_55756909_MSI2_NM_+|	30.1719	-5.39357	1.65513	-3.2587	0.00111925	0.123021	0	0	2.27974	3.17767	4.30987	82.1156	101.143	20.5176	37.0728	51.1028	0	8.9861	-Inf	1.33858	-Inf	MSI2	-	chr17_57274666_+
chr16:89795667-89795735:mpeak_34301|chr16_89786775_89804383_ZNF276_NR_+mpeak_34301|chr16_89787392_89804383_ZNF276_NM_+||	21.629	-3.74278	1.70816	-2.19112	0.0284431	0.308139	0	0	6.83921	0	3.07848	48.8255	25.0139	52.4339	41.3097	38.7889	0	7.48321	-Inf	-0.258921	-Inf	ZNF276	-	chr16_89729269_+
chr16:89452527-89452745:mpeak_34236|chr16_89353521_89556969_ANKRD11_NR_-mpeak_34236|chr16_89335071_89556969_ANKRD11_NM_-||	69.1655	-4.41604	1.59602	-2.76691	0.00565911	0.197157	1.10967	0	4.55947	7.41457	9.85114	105.419	234.913	92.3293	119.692	116.367	0.326055	6.64615	-3.71283	0.636502	-4.34933	ANKRD11	-	chr16_89386160_-
chr15:90153502-90153561:mpeak_30247|chr15_90118817_90170186_TICRR_NM_+|	15.3883	-3.78272	1.66841	-2.26726	0.0233742	0.283669	0	0	3.4196	2.11845	8.00405	18.8644	19.5761	33.0562	42.369	26.4749	0	13.2896	-Inf	-0.821494	-Inf	TICRR	-	chr15_89610330_+
chr15:56756218-56756318:mpeak_28971|chr15_56721391_56757335_MNS1_NM_-|	3.4143	-4.85417	2.34783	-2.06751	0.0386857	NA	0	0	6.83921	3.17767	9.23544	5.54835	0	1.13987	6.35534	1.84709	0	206.077	-Inf	-0.166756	-Inf	MNS1	-	chr15_56464031_-
chr15:52673851-52673908:mpeak_28840|chr15_52606045_52821247_MYO5A_NM_-|	73.3526	-2.20306	0.873563	-2.52193	0.0116714	0.220256	4.43868	0	10.2588	6.35534	8.00405	174.218	144.646	128.805	139.818	116.982	1.39203	6.38431	-1.88656	0.31078	-2.19734	MYO5A	-	chr15_52381643_-
chr13:77825431-77825500:mpeak_23764|chr13_77619628_77901177_MYCBP2_NM_-|	47.0421	-1.46008	0.572107	-2.55211	0.0107073	0.215362	12.2064	11.9632	23.9372	12.7107	22.7808	103.199	100.056	52.4339	72.0272	59.1068	11.8912	32.3742	-0.713007	0.731938	-1.44494	MYCBP2	-	chr13_77251308_-
chr12:62950347-62950487:mpeak_19611|chr12_62860596_62986365_MON2_NM_+|	137.567	-1.48084	0.563047	-2.63004	0.00853741	0.203161	5.54835	7.61293	13.6784	18.0068	16.0081	301.83	269.715	232.533	266.924	243.816	2.30275	6.41666	-1.27253	0.205938	-1.47846	MON2	-	chr12_62556653_+
chr10:96109078-96109144:mpeak_11633|chr10_96094062_96122733_NOC3L_NM_-|	37.8833	-5.21177	1.56933	-3.32101	0.000896927	0.111128	0	0	11.3987	10.5922	6.15696	45.4965	79.392	75.2313	69.9088	80.6562	0	12.4661	-Inf	-0.269419	-Inf	NOC3L	-	chr10_94349345_-
chr10:105750430-105750490:mpeak_12217|chr10_105726942_105785331_SLK_NM_+|	71.9925	-2.03814	0.94349	-2.16022	0.0307558	0.316676	2.21934	2.17512	7.97908	7.41457	16.0081	103.199	139.208	106.008	169.476	166.238	1.81284	7.10895	-2.25212	-0.280742	-1.97138	SLK	-	chr10_103990708_+
chr1:94009656-94009769:mpeak_3426|chr1_93913687_94016503_FNBP1L_NM_+|	43.6414	-1.86382	0.902043	-2.06622	0.0388074	0.349008	3.32901	1.08756	7.97908	12.7107	12.3139	57.7029	70.6915	99.1685	100.626	70.8051	3.43985	12.1965	-2.31667	-0.490617	-1.82605	FNBP1L	-	chr1_93544197_+
chr1:85643128-85643423:mpeak_3141|chr1_85624932_85666728_SYDE2_NM_-|	40.9599	-1.23345	0.61192	-2.0157	0.0438316	0.367566	25.5224	42.4149	91.1895	60.3758	86.1975	15.5354	26.1015	23.9372	18.0068	20.318	163.166	381.874	-1.22228	0.00447117	-1.22676	SYDE2	-	chr1_85177582_-;chr1_85177661_-
chr1:147080809-147080883:mpeak_4978|chr1_147013270_147095642_BCL9_NM_+|	46.2031	-3.59111	1.62622	-2.20825	0.0272267	0.301856	0	1.08756	5.69934	2.11845	3.69418	76.5673	165.309	72.9516	58.2573	76.3463	0.449635	5.54646	-2.819	0.805738	-3.62474	BCL9	-	chr1_147609086_+
chr19:12588992-12589043:mpeak_41555|chr19_12576547_12595632_ZNF709_NM_-|	2.3647	-7.88135	2.40461	-3.2776	0.00104693	NA	0	1.08756	3.4196	2.11845	4.92557	6.65802	5.43781	0	0	0	8.99121	#DIV/0!	-2.68125	Inf	-Inf	ZNF709	-	-
chr3:49696743-49696846:mpeak_57694|chr3_49591921_49705022_BSN_NM_+|	3.72559	-4.49504	1.81944	-2.47056	0.01349	NA	2.21934	1.08756	7.97908	2.11845	1.84709	8.87736	9.78805	2.27974	1.05922	0	17.7167	357.735	-1.26785	3.06786	-4.3357	BSN	-	-
chr8:71570046-71570127:mpeak_80746|chr8_71550138_71581447_LACTB2_NM_-|	20.6395	-1.59231	0.675922	-2.35575	0.0184851	0.25696	15.5354	9.78805	27.3568	34.9544	31.4005	16.6451	22.8388	11.3987	18.0068	18.4709	64.1362	195.737	-1.30279	0.306911	-1.6097	LACTB2	-	-
chr17:57161518-57161771:mpeak_37563|chr17_57060282_57184266_TRIM37_NM_-|	130.69	-1.10029	0.449982	-2.44518	0.014478	0.230879	113.186	122.894	142.484	213.963	139.763	115.406	175.097	85.4901	103.804	94.8172	81.2662	174.653	-0.486707	0.61706	-1.10377	TRIM37	-	-
chr13:94186316-94186366:mpeak_23851|chr13_93879077_95055268_GPC6_NM_+|	74.6937	-1.09905	0.469371	-2.34155	0.0192039	0.261236	68.7996	76.1293	103.728	61.435	72.6522	98.7607	108.756	45.5947	47.6651	63.4167	69.8396	151.787	-0.129533	0.990401	-1.11993	GPC6	-	-
chr5:130846043-130846252:mpeak_68427|chr5_130762984_130970929_RAPGEF6_NM_-|	12.831	-2.25244	1.10795	-2.03298	0.0420547	NA	1.10967	4.35024	15.9582	22.2437	9.85114	9.98703	16.3134	15.9582	23.3029	9.23544	20.7598	99.0854	-2.55271	-0.297831	-2.25488	RAPGEF6	-	-
chr19:21336389-21336463:mpeak_42198|chr19_21324839_21365425_ZNF431_NM_+|	7.59147	-3.34908	1.65952	-2.01809	0.0435814	NA	2.21934	0	6.83921	5.29612	12.9296	11.0967	11.9632	9.11895	1.05922	15.3924	9.62425	98.0226	-2.91251	0.435863	-3.34837	ZNF431	-	-
chr14:24631450-24631543:mpeak_24636|chr14_24630421_24635330_IRF9_NM_+|	3.64112	-4.3994	1.90615	-2.308	0.020999	NA	0	0	4.55947	2.11845	5.54127	3.32901	6.52537	4.55947	4.2369	5.54127	0	85.2246	-Inf	0.0439921	-Inf	IRF9	-	-
chr12:105625865-105625989:mpeak_20880|chr12_105568226_105630008_APPL2_NM_-|	41.1444	-1.44069	0.515308	-2.79578	0.0051775	0.197157	11.0967	17.401	30.7764	34.9544	40.0203	56.5932	59.8159	56.9934	50.8427	52.9499	24.4806	65.7713	-1.30679	0.119024	-1.42582	APPL2	-	-
chr20:57407246-57407323:mpeak_53339|chr20_57394310_57425958_GNAS-AS1_NR_-|	3.9498	-4.73584	2.24095	-2.11331	0.0345739	NA	0	0	0	1.05922	6.77266	5.54835	11.9632	6.83921	4.2369	3.07848	0	55.3311	-Inf	0.891998	-Inf	GNAS-AS1	-	-
chrX:134477177-134477252:mpeak_88507|chrX_134383248_134478012_ZNF75D_NR_-mpeak_88507|chrX_134421778_134478012_ZNF75D_NM_-||	7.61806	-3.89355	1.83861	-2.11766	0.0342038	NA	1.10967	0	5.69934	6.35534	3.69418	7.76769	22.8388	3.4196	14.8291	10.4668	3.62561	54.8443	-3.24208	0.676966	-3.91905	ZNF75D	-	-
chr8:145613344-145613395:mpeak_82782|chr8_145597703_145618183_ADCK5_NM_+|	6.64761	-5.00507	2.07015	-2.41774	0.0156173	NA	0	0	9.11895	0	5.54127	18.8644	5.43781	12.5386	6.35534	8.61975	0	53.2834	-Inf	0.405902	-Inf	ADCK5	-	-
chr11:82905463-82905520:mpeak_15911|chr11_82904780_82923694_ANKRD42_NR_+mpeak_15911|chr11_82904780_82966886_ANKRD42_NM_+||	13.2629	-2.54321	1.09517	-2.32221	0.0202219	0.267242	3.32901	0	11.3987	10.5922	8.00405	21.0837	18.4885	17.098	18.0068	24.6279	8.41248	50.2153	-2.58659	-0.00906792	-2.57752	ANKRD42	-	-
chr8:100135924-100136083:mpeak_81465|chr8_100025493_100887645_VPS13B_NM_+|	14.4031	-2.2857	1.07896	-2.11843	0.0341387	0.330345	1.10967	4.35024	4.55947	10.5922	9.85114	18.8644	39.1522	26.217	12.7107	16.6238	9.41095	45.0085	-1.61018	0.647603	-2.25778	VPS13B	-	-
chrX:119070258-119070404:mpeak_88256|chrX_119059357_119077735_NKAP_NM_-|	31.684	-1.62669	0.71137	-2.2867	0.0222134	0.278472	6.65802	6.52537	19.3778	28.599	12.9296	42.1675	56.5532	43.315	50.8427	49.8714	13.3542	42.2876	-1.62291	0.0400256	-1.66294	NKAP	-	-
chr5:64857283-64857365:mpeak_66754|chr5_64814460_64858995_CENPK_NM_-|	7.63582	-3.94621	1.766	-2.23455	0.0254469	NA	0	0	6.83921	7.41457	1.84709	8.87736	8.70049	11.3987	15.8884	15.3924	0	37.7251	-Inf	-0.69482	-Inf	CENPK	-	-
chr2:99437664-99437715:mpeak_47472|chr2_99411134_99552684_KIAA1211L_NM_-|	15.1824	-2.86321	1.27495	-2.24574	0.0247205	0.289909	2.21934	1.08756	5.69934	2.11845	12.3139	27.7418	40.2398	13.6784	30.7175	16.0081	4.86441	33.3284	-2.02096	0.755461	-2.77642	KIAA1211L	-	-
chr12:72035810-72035860:mpeak_20009|chr12_72004345_72057749_ZFC3H1_NM_-|	8.9902	-4.28564	1.93407	-2.21587	0.0267003	NA	0	0	2.27974	9.53301	1.84709	11.0967	17.401	5.69934	25.4214	16.6238	0	28.6103	-Inf	-0.159528	-Inf	ZFC3H1	-	-
chr13:41896620-41896732:mpeak_23095|chr13_41885340_41949540_NAA16_NM_+|	22.7975	-3.64686	1.25541	-2.90491	0.00367357	0.18265	2.21934	0	4.55947	8.47379	14.7767	55.4835	40.2398	37.6157	38.1321	26.4749	2.3185	27.2053	-3.06244	0.490189	-3.55263	NAA16	-	-
chr1:42311158-42311215:mpeak_2100|chr1_41976937_42384378_HIVEP3_NM_-|	7.23988	-3.88819	1.90268	-2.04354	0.0409992	NA	0	0	3.4196	5.29612	1.23139	18.8644	5.43781	15.9582	7.41457	14.7767	0	26.0741	-Inf	-0.0656121	-Inf	HIVEP3	-	-
chr8:101210520-101210661:mpeak_81504|chr8_101170262_101253118_SPAG1_NM_+|	10.9999	-4.62181	1.81349	-2.54857	0.0108164	NA	0	0	0	8.47379	5.54127	14.4257	25.0139	19.3778	13.7699	23.3965	0	24.7861	-Inf	0.0652309	-Inf	SPAG1	-	-
chr15:62150418-62150470:mpeak_29133|chr15_62146757_62352664_VPS13C_NM_-|	17.6012	-3.36368	1.35782	-2.47727	0.0132393	0.226587	2.21934	0	1.13987	4.2369	8.00405	38.8385	58.7283	18.2379	28.599	16.0081	2.27469	21.2918	-2.007	1.21955	-3.22655	VPS13C	-	-
chr11:20502210-20502268:mpeak_13767|chr11_20409075_20529849_PRMT3_NM_+|	11.3018	-4.29081	1.7834	-2.40597	0.0161294	NA	0	0	6.83921	0	6.15696	18.8644	18.4885	13.6784	24.3621	24.6279	0	20.738	-Inf	-0.161554	-Inf	PRMT3	-	-
chr1:41629726-41629877:mpeak_2086|chr1_41493991_41707815_SCMH1_NM_-|	16.9826	-3.68732	1.77103	-2.08202	0.0373408	0.343139	0	1.08756	9.11895	1.05922	6.77266	17.7547	51.1154	18.2379	33.8952	30.7848	1.57915	20.4429	-3.37723	0.317157	-3.69438	SCMH1	-	-
chr12:123801782-123801912:mpeak_21931|chr12_123780597_123834988_SBNO1_NM_-|	189.49	-0.943821	0.419547	-2.24962	0.0244732	0.288575	42.1675	38.0646	58.1333	43.4282	73.2679	356.204	407.835	256.47	307.175	312.158	10.501	19.9622	-0.538733	0.388003	-0.926736	SBNO1	-	-
chr8:25180936-25180988:mpeak_79727|chr8_25042286_25268709_DOCK5_NM_+|	15.8184	-4.8649	1.64087	-2.96484	0.00302844	0.177718	0	0	3.4196	6.35534	5.54127	23.3031	38.0646	23.9372	36.0136	21.5494	0	18.7929	-Inf	0.175639	-Inf	DOCK5	-	-
chr3:142226008-142226167:mpeak_60028|chr3_142168444_142297668_ATR_NM_-|	23.659	-2.92705	1.26077	-2.32164	0.0202525	0.267242	0	2.17512	7.97908	7.41457	7.38836	31.0708	58.7283	26.217	51.902	43.7144	2.42221	18.6993	-2.80376	0.144826	-2.94859	ATR	-	-
chr22:21198076-21198140:mpeak_54880|chr22_21062386_21213100_PI4KA_NM_-|	18.8521	-3.9431	1.64453	-2.39771	0.016498	0.247105	1.10967	0	5.69934	3.17767	6.15696	31.0708	58.7283	35.3359	27.5398	19.7023	1.23573	18.2058	-3.17506	0.705905	-3.88097	PI4KA	-	-
chr8:25268572-25268622:mpeak_79734|chr8_25042286_25268709_DOCK5_NM_+|	15.8315	-3.33417	1.63235	-2.04255	0.0410965	0.358386	1.10967	0	4.55947	4.2369	5.54127	23.3031	38.0646	23.9372	36.0136	21.5494	1.80823	17.5921	-3.10664	0.175639	-3.28228	DOCK5	-	-
chr21:47746288-47746446:mpeak_54603|chr21_47744035_47865196_PCNT_NM_+|	34.5654	-1.99002	0.887658	-2.24188	0.0249694	0.290619	3.32901	1.08756	10.2588	8.47379	11.6982	48.8255	63.0785	67.2522	68.8495	62.801	3.94675	15.2993	-2.19957	-0.244839	-1.95473	PCNT	-	-
chr13:115016519-115016569:mpeak_24255|chr13_115000361_115037658_CDC16_NM_+|	25.1762	-4.02718	1.60316	-2.51202	0.0120042	0.220256	1.10967	0	4.55947	7.41457	3.69418	79.8963	47.8527	31.9163	32.8359	42.483	0.868634	14.6111	-3.23468	0.837494	-4.07217	CDC16	-	-
chr21:22413334-22413424:mpeak_53751|chr21_22370632_22910166_NCAM2_NM_+|	33.7378	-2.48914	1.19747	-2.07868	0.0376471	0.344633	0	2.17512	11.3987	12.7107	7.38836	44.3868	42.4149	74.0914	91.0933	51.7185	2.50585	14.5216	-3.27112	-0.736294	-2.53482	NCAM2	-	-
chr15:90142738-90142890:mpeak_30244|chr15_90118817_90170186_TICRR_NM_+|	15.4315	-3.76299	1.63932	-2.29545	0.0217072	0.276485	0	0	5.69934	2.11845	6.15696	18.8644	19.5761	33.0562	42.369	26.4749	0	13.7142	-Inf	-0.821494	-Inf	TICRR	-	-
chr12:6787941-6787991:mpeak_17354|chr12_6777281_6798738_ZNF384_NM_-|	14.4931	-4.03676	1.86655	-2.16269	0.030565	0.316676	0	0	9.11895	1.05922	0.615696	24.4127	29.3641	22.7974	36.0136	21.5494	0	13.4318	-Inf	0.00546526	-Inf	ZNF384	-	-
chr16:2977744-2977800:mpeak_30971|chr16_2961979_2998688_FLYWCH1_NM_+|	17.505	-4.50638	1.67579	-2.6891	0.00716439	0.203115	0	0	4.55947	6.35534	0.615696	37.7288	39.1522	30.7764	27.5398	28.322	0	13.3088	-Inf	0.412585	-Inf	FLYWCH1	-	-
chr22:29447378-29447442:mpeak_55202|chr22_29279754_29449566_ZNRF3_NM_+mpeak_55202|chr22_29279754_29449566_ZNRF3_NM_+||	82.3254	-1.0561	0.537133	-1.96619	0.0492772	0.388498	11.0967	11.9632	13.6784	19.066	19.0866	149.806	207.724	126.525	123.929	140.379	6.44978	13.2617	-0.583469	0.456472	-1.03994	ZNRF3	-	-
chr8:100864684-100864734:mpeak_81487|chr8_100025493_100887645_VPS13B_NM_+|	12.0865	-4.42401	1.9163	-2.30861	0.0209651	NA	0	0	1.13987	0	6.15696	18.8644	39.1522	26.217	12.7107	16.6238	0	13.1353	-Inf	0.647603	-Inf	VPS13B	-	-
chr11:68682444-68682494:mpeak_15355|chr11_68671318_68707001_IGHMBP2_NM_+|	12.6206	-3.65601	1.74998	-2.08917	0.0366924	NA	0	0	3.4196	0	6.77266	19.9741	16.3134	23.9372	31.7767	24.0122	0	12.7841	-Inf	-0.550618	-Inf	IGHMBP2	-	-
chr20:61565229-61565333:mpeak_53511|chr20_61513766_61569304_DIDO1_NM_-|	40.1131	-2.4807	1.12018	-2.21456	0.02679	0.300789	1.10967	2.17512	14.8183	8.47379	4.30987	97.651	54.3781	87.7699	76.2641	54.1813	2.16063	12.649	-2.48593	0.0635576	-2.54949	DIDO1	-	-
chr1:10596678-10596728:mpeak_507|chr1_10535002_10689587_PEX14_NM_+|	21.9673	-4.95826	1.76857	-2.80354	0.00505446	0.197157	0	0	1.13987	2.11845	11.0825	36.6191	54.3781	28.4967	47.6651	38.1732	0	12.5428	-Inf	0.25559	-Inf	PEX14	-	-
chr5:78926753-78926803:mpeak_67337|chr5_78908242_78981021_PAPD4_NM_+|	11.8459	-3.88087	1.73081	-2.24223	0.0249467	NA	0	0	1.13987	3.17767	3.69418	17.7547	28.2766	13.6784	21.1845	29.5534	0	12.4374	-Inf	0.100152	-Inf	PAPD4	-	-
chr18:72547704-72547754:mpeak_40500|chr18_72342918_72775105_ZNF407_NM_+|	13.3239	-4.22597	1.72744	-2.44637	0.0144301	0.230879	0	0	3.4196	0	4.92557	24.4127	32.6268	15.9582	25.4214	26.4749	0	12.2986	-Inf	0.334482	-Inf	ZNF407	-	-
chr13:51960031-51960082:mpeak_23506|chr13_51939981_52027275_INTS6_NM_-|	16.8842	-4.55269	1.74221	-2.61317	0.00897074	0.206155	0	0	1.13987	6.35534	1.84709	32.1804	50.0278	25.0771	15.8884	36.3261	0	12.0871	-Inf	0.673935	-Inf	INTS6	-	-
chr8:86384843-86384912:mpeak_80974|chr8_86376130_86392898_CA2_NM_+|	22.0766	-5.77969	1.80012	-3.21072	0.00132403	0.126212	0	0	1.13987	0	5.54127	69.9092	88.0924	28.4967	15.8884	11.6982	0	11.9129	-Inf	2.07926	-Inf	CA2	-	-
chrX:24767047-24767117:mpeak_86878|chrX_24712063_25013921_POLA1_NM_+|	12.9251	-3.51364	1.67881	-2.09293	0.036355	NA	0	0	4.55947	1.05922	3.69418	15.5354	23.9263	26.217	22.2437	32.0162	0	11.5721	-Inf	-0.443158	-Inf	POLA1	-	-
chr10:75581742-75581832:mpeak_11040|chr10_75574263_75634349_CAMK2G_NM_-|	58.7876	-2.26268	0.778651	-2.9059	0.00366201	0.18265	4.43868	2.17512	11.3987	7.41457	13.5453	127.612	140.295	75.2313	109.1	96.6643	2.46869	11.5157	-1.70563	0.516149	-2.22178	CAMK2G	-	-
chr10:88603537-88603722:mpeak_11309|chr10_88516395_88683350_BMPR1A_NM_+|	23.6371	-2.7183	1.28184	-2.12063	0.0339532	0.329792	1.10967	1.08756	3.4196	1.05922	8.00405	58.8125	54.3781	45.5947	29.6583	33.2476	1.94118	11.5049	-1.92123	0.646013	-2.56724	BMPR1A	-	-
chr14:35237206-35237256:mpeak_24914|chr14_35222910_35344853_BAZ1A_NM_-|	11.8074	-3.88028	1.78974	-2.16806	0.030154	NA	0	0	2.27974	0	4.92557	15.5354	31.5393	20.5176	25.4214	17.8552	0	11.2946	-Inf	0.146488	-Inf	BAZ1A	-	-
chr13:28227421-28227558:mpeak_22719|chr13_28194879_28239822_POLR1D_NM_+|	149.285	-1.43109	0.613408	-2.33302	0.0196472	0.26296	7.76769	14.1383	31.9163	22.2437	41.2517	231.921	290.379	205.176	319.886	328.166	4.19414	11.1824	-1.53788	-0.12309	-1.41479	POLR1D	-	-
chr19:23413679-23413732:mpeak_42307|chr19_23406820_23433172_ZNF724P_NR_-|	13.0319	-4.15872	1.80432	-2.30487	0.0211739	NA	0	0	0	2.11845	4.92557	33.2901	25.0139	31.9163	20.1253	12.9296	0	10.8418	-Inf	0.428758	-Inf	ZNF724P	-	-
chr12:133308015-133308076:mpeak_22232|chr12_133304029_133338474_ANKLE2_NM_-|	123.493	-1.04835	0.489416	-2.14205	0.0321893	0.321625	12.2064	15.2259	23.9372	15.8884	27.0906	261.882	256.664	183.519	215.022	223.498	5.29021	10.7576	-0.701522	0.322431	-1.02395	ANKLE2	-	-
chr14:103090486-103090536:mpeak_27462|chr14_103058995_103192804_RCOR1_NM_+|	80.4404	-1.4158	0.601991	-2.35186	0.0186796	0.2583	7.76769	4.35024	17.098	10.5922	18.4709	150.915	152.259	142.484	151.469	148.998	3.99703	10.4213	-1.34457	0.03796	-1.38253	RCOR1	-	-
chr17:55353837-55353892:mpeak_37367|chr17_55333930_55756909_MSI2_NM_+|	30.3123	-5.65418	1.67843	-3.36874	0.00075513	0.100693	0	0	2.27974	2.11845	6.77266	82.1156	101.143	20.5176	37.0728	51.1028	0	10.2774	-Inf	1.33858	-Inf	MSI2	-	-
chr1:229768008-229768060:mpeak_8479|chr1_229761980_229794846_URB2_NM_+|	20.2461	-4.36433	1.64331	-2.65581	0.00791178	0.203115	0	0	6.83921	0	4.30987	41.0578	40.2398	43.315	32.8359	33.8633	0	10.1342	-Inf	0.148556	-Inf	URB2	-	-
chr6:155620463-155620514:mpeak_74636|chr6_155579216_155635617_TFB1M_NM_-|	15.967	-3.46749	1.69761	-2.04257	0.041095	0.358386	0	0	4.55947	0	6.15696	17.7547	23.9263	29.6366	41.3097	36.3261	0	9.98993	-Inf	-0.778852	-Inf	TFB1M	-	-
chr14:64564660-64564781:mpeak_25919|chr14_64319682_64692036_SYNE2_NM_+|	35.428	-2.10083	1.04873	-2.00321	0.0451551	0.371261	2.21934	1.08756	9.11895	4.2369	4.92557	56.5932	91.3551	55.8535	59.3165	69.5737	2.23517	9.89555	-1.88186	0.26453	-2.14639	SYNE2	-	-
chr22:50187053-50187103:mpeak_56095|chr22_50168064_50221196_BRD1_NM_-|	15.7672	-3.82772	1.78035	-2.14998	0.0315566	0.318594	0	0	0	3.17767	6.15696	28.8514	23.9263	35.3359	42.369	17.8552	0	9.76834	-Inf	-0.271515	-Inf	BRD1	-	-
chr2:86434316-86434460:mpeak_47167|chr2_86426555_86437602_MRPL35_NM_+|	179.63	-1.40304	0.562935	-2.49236	0.0126898	0.222144	16.6451	8.70049	20.5176	46.6058	26.4749	331.791	369.771	341.96	305.056	328.782	3.61273	9.59198	-1.29979	0.10895	-1.40874	MRPL35	-	-
chr4:148834231-148834294:mpeak_64919|chr4_148653452_148993143_ARHGAP10_NM_+|	37.9261	-2.6649	1.3059	-2.04066	0.0412847	0.358742	1.10967	1.08756	12.5386	0	7.38836	67.6899	79.392	58.1333	80.501	71.4208	1.49388	9.48652	-2.596	0.0708142	-2.66681	ARHGAP10	-	-
chr9:35237694-35237744:mpeak_83488|chr9_35161988_35403744_UNC13B_NM_+|	16.0781	-4.45114	2.06922	-2.15111	0.0314672	0.318402	0	0	1.13987	0	5.54127	41.0578	42.4149	21.6575	43.4282	5.54127	0	9.45975	-Inf	0.826048	-Inf	UNC13B	-	-
chr2:159860696-159860815:mpeak_48876|chr2_159825145_160086088_TANC1_NM_+|	31.8815	-5.1563	1.77272	-2.9087	0.00362936	0.18265	0	0	10.2588	0	1.84709	64.3609	107.669	41.0353	41.3097	52.3342	0	8.9887	-Inf	0.938091	-Inf	TANC1	-	-
chr18:680476-680527:mpeak_39260|chr18_674406_712662_ENOSF1_NM_-|	19.8948	-3.8627	1.65261	-2.33734	0.0194216	0.261236	0	0	1.13987	7.41457	1.84709	38.8385	31.5393	35.3359	43.4282	39.4046	0	8.80227	-Inf	-0.162694	-Inf	ENOSF1	-	-
chr13:21370033-21370191:mpeak_22422|chr13_21358058_21476913_XPO4_NM_-|	44.3386	-5.35193	1.8629	-2.8729	0.00406725	0.184529	0	0	1.13987	2.11845	17.8552	94.322	83.7422	96.8888	97.4486	49.8714	0	8.64568	-Inf	0.129245	-Inf	XPO4	-	-
chr2:48018118-48018266:mpeak_46060|chr2_48010220_48033917_MSH6_NM_+|	122.474	-1.51303	0.587285	-2.57631	0.00998598	0.21109	11.0967	4.35024	17.098	14.8291	24.6279	217.495	278.416	209.736	226.674	220.419	3.11486	8.61031	-1.28737	0.179526	-1.4669	MSH6	-	-
chr7:129257962-129258099:mpeak_78336|chr7_129251542_129394857_NRF1_NM_+mpeak_78336|chr7_129251542_129394857_NRF1_NM_+||	33.7094	-5.09999	1.6779	-3.03952	0.00236957	0.161202	0	0	3.4196	1.05922	10.4668	81.0059	66.3412	44.4549	73.0864	57.2598	0	8.5501	-Inf	0.338468	-Inf	NRF1	-	-
chr19:53134775-53134831:mpeak_44028|chr19_53118050_53193834_ZNF83_NM_-|	17.5811	-3.65641	1.7986	-2.03292	0.0420605	0.361667	0	0	2.27974	2.11845	4.92557	9.98703	46.7651	29.6366	41.3097	38.7889	0	8.4966	-Inf	-0.366316	-Inf	ZNF83	-	-
chr1:31811813-31811901:mpeak_1495|chr1_31769828_31836878_ZCCHC17_NM_+|	48.7076	-2.88766	1.20726	-2.39191	0.016761	0.247105	2.21934	0	4.55947	4.2369	14.161	85.4446	96.7929	91.1895	94.2709	94.2015	1.21783	8.20898	-2.78579	-0.032901	-2.75289	ZCCHC17	-	-
chr12:120208581-120208707:mpeak_21536|chr12_120126060_120315095_CIT_NM_-|	23.552	-4.04669	1.72515	-2.3457	0.0189912	0.25998	0	0	5.69934	0	6.15696	38.8385	39.1522	45.5947	69.9088	30.1691	0	8.13901	-Inf	-0.316394	-Inf	CIT	-	-
chr7:63996827-63996897:mpeak_76502|chr7_63982878_64023505_ZNF680_NM_-|	25.7287	-3.54515	1.60477	-2.20913	0.0271656	0.301856	0	0	5.69934	6.35534	2.46279	27.7418	34.802	53.5738	73.0864	53.5656	0	8.05515	-Inf	-0.941906	-Inf	ZNF680	-	-
chr22:34276957-34277107:mpeak_55453|chr22_33670610_34316416_LARGE_NM_-|	56.99	-1.78491	0.856014	-2.08514	0.0370566	0.341801	4.43868	2.17512	11.3987	1.05922	7.38836	152.025	138.12	72.9516	83.6787	96.6643	2.27948	7.83525	-1.00035	0.780921	-1.78127	LARGE	-	-
chr18:59801819-59801869:mpeak_40398|chr18_59713212_59854289_PIGN_NM_-|	15.7914	-3.74977	1.71707	-2.18382	0.0289754	0.310604	0	0	0	2.11845	4.92557	28.8514	31.5393	26.217	40.2505	24.0122	0	7.7852	-Inf	0.00169588	-Inf	PIGN	-	-
chr12:62669315-62669385:mpeak_19590|chr12_62654120_62797972_USP15_NM_+|	35.3517	-3.21144	1.59748	-2.01032	0.0443978	0.369011	0	1.08756	4.55947	5.29612	6.15696	48.8255	80.4795	47.8745	84.7379	74.4992	0.841082	7.73136	-3.29507	-0.0946678	-3.2004	USP15	-	-
chr14:89813192-89813272:mpeak_26880|chr14_89629313_90085494_FOXN3_NM_-|	44.055	-4.0266	1.57615	-2.55471	0.0106277	0.215362	1.10967	0	2.27974	5.29612	8.00405	88.7736	130.507	56.9934	73.0864	74.4992	0.50605	7.61559	-3.22652	0.685084	-3.91161	FOXN3	-	-
chr7:104693608-104693662:mpeak_77804|chr7_104654636_104752271_KMT2E_NM_+|	22.9009	-4.2017	1.67302	-2.51144	0.012024	0.220256	0	0	0	4.2369	5.54127	42.1675	47.8527	28.4967	50.8427	49.8714	0	7.5676	-Inf	0.0635554	-Inf	KMT2E	-	-
chr12:120149472-120149522:mpeak_21532|chr12_120126060_120315095_CIT_NM_-|	23.449	-3.89434	1.65703	-2.3502	0.0187635	0.258536	0	0	2.27974	4.2369	4.30987	38.8385	39.1522	45.5947	69.9088	30.1691	0	7.43208	-Inf	-0.316394	-Inf	CIT	-	-
chr9:126289385-126289437:mpeak_85478|chr9_126144904_126692417_DENND1A_NM_-|	27.9006	-3.18067	1.61914	-1.96442	0.0494815	0.38908	1.10967	0	2.27974	1.05922	6.77266	57.7029	66.3412	52.4339	51.902	39.4046	0.894577	7.03464	-2.60285	0.372349	-2.9752	DENND1A	-	-
chr2:9482287-9482344:mpeak_44781|chr2_9346893_9543381_ASAP2_NM_+|	37.2467	-4.22967	1.68156	-2.51533	0.0118921	0.220256	0	0	9.11895	6.35534	1.23139	44.3868	72.8666	70.6718	103.804	64.0324	0	7.00424	-Inf	-0.439446	-Inf	ASAP2	-	-
chr2:128497807-128497878:mpeak_48224|chr2_128464126_128568761_WDR33_NM_-|	23.6415	-4.29392	1.92526	-2.23031	0.0257267	0.296031	0	0	0	0	8.61975	51.0448	50.0278	36.4758	50.8427	39.4046	0	6.80203	-Inf	0.258676	-Inf	WDR33	-	-
chr5:140063077-140063127:mpeak_69011|chr5_140053913_140071312_HARS_NM_-|	24.7841	-4.10371	1.6431	-2.49755	0.0125056	0.221796	0	0	0	3.17767	6.77266	43.2771	46.7651	55.8535	47.6651	44.3301	0	6.73007	-Inf	-0.130485	-Inf	HARS	-	-
chr16:78805620-78805673:mpeak_33755|chr16_78133309_79245504_WWOX_NM_+|	19.1798	-3.88037	1.77346	-2.18802	0.0286681	0.30984	0	0	1.13987	1.05922	4.92557	19.9741	58.7283	38.7555	29.6583	37.5575	0	6.7232	-Inf	0.155768	-Inf	WWOX	-	-
chr6:35017438-35017488:mpeak_71835|chr6_34857037_35056382_ANKS1A_NM_+|	19.4392	-3.87731	1.72522	-2.24743	0.0246128	0.289135	0	0	2.27974	0	4.92557	43.2771	35.8895	22.7974	47.6651	37.5575	0	6.67035	-Inf	0.13663	-Inf	ANKS1A	-	-
chr17:62619796-62619872:mpeak_38237|chr17_62542065_62658386_SMURF2_NM_-|	36.3073	-4.53926	1.64073	-2.76662	0.00566411	0.197157	0	0	6.83921	0	7.38836	77.6769	56.5532	83.2104	74.1457	57.2598	0	6.62932	-Inf	-0.0920856	-Inf	SMURF2	-	-
chr1:10603037-10603098:mpeak_508|chr1_10535002_10689587_PEX14_NM_+|	21.2548	-4.07043	1.7602	-2.31248	0.0207514	0.269655	0	0	0	1.05922	6.15696	36.6191	54.3781	28.4967	47.6651	38.1732	0	6.31144	-Inf	0.25559	-Inf	PEX14	-	-
chr7:135068252-135068398:mpeak_78495|chr7_135047938_135194875_CNOT4_NM_-|	35.1234	-4.60715	1.58815	-2.90095	0.0037203	0.18265	0	0	1.13987	5.29612	5.54127	61.0319	87.0049	63.8326	57.1981	70.1894	0	6.2636	-Inf	0.215684	-Inf	CNOT4	-	-
chr9:98768964-98769123:mpeak_84508|chr9_98637899_98774506_ERCC6L2_NM_+|	45.6859	-4.70404	1.5911	-2.95646	0.00311189	0.177718	0	0	7.97908	4.2369	4.30987	73.2382	102.231	63.8326	88.9748	112.057	0	6.23937	-Inf	-0.00907401	-Inf	ERCC6L2	-	-
chr1:109147178-109147232:mpeak_3750|chr1_109102970_109177729_FAM102B_NM_+|	36.7375	-3.95751	1.72468	-2.29463	0.0217541	0.276624	0	0	3.4196	9.53301	2.46279	76.5673	28.2766	102.588	54.0204	90.5074	0	6.23813	-Inf	-0.651983	-Inf	FAM102B	-	-
chr11:77380181-77380235:mpeak_15805|chr11_77378536_77531880_RSF1_NM_-|	20.8492	-3.82271	1.65043	-2.31619	0.0205481	0.269252	0	0	0	2.11845	5.54127	39.9481	38.0646	38.7555	43.4282	40.636	0	6.23655	-Inf	-0.0697967	-Inf	RSF1	-	-
chr6:18149214-18149354:mpeak_70805|chr6_18131011_18155396_TPMT_NM_-|	25.4994	-3.36246	1.68131	-1.99991	0.0455105	0.371979	0	0	5.69934	3.17767	1.84709	29.9611	41.3273	64.9725	74.1457	33.8633	0	6.19957	-Inf	-0.693915	-Inf	TPMT	-	-
chr2:155584955-155585006:mpeak_48824|chr2_155555092_155711238_KCNJ3_NM_+|	21.525	-3.66756	1.75405	-2.09091	0.0365359	0.340194	0	0	0	1.05922	7.38836	37.7288	32.6268	47.8745	49.7835	38.7889	0	6.19111	-Inf	-0.370639	-Inf	KCNJ3	-	-
chr10:105133553-105133608:mpeak_12176|chr10_105127723_105147762_TAF5_NM_+|	20.4114	-3.56204	1.71291	-2.07952	0.0375692	0.344633	0	0	3.4196	0	4.30987	26.6321	44.59	51.2941	45.5466	28.322	0	6.17554	-Inf	-0.228446	-Inf	TAF5	-	-
chr5:128798167-128798222:mpeak_68380|chr5_128796102_129072759_ADAMTS19_NM_+|	25.822	-3.36	1.62566	-2.06685	0.0387485	0.348768	0	0	5.69934	1.05922	4.30987	24.4127	42.4149	58.1333	55.0796	67.1109	0	6.13809	-Inf	-0.847111	-Inf	ADAMTS19	-	-
chr2:179977312-179977444:mpeak_49489|chr2_179974755_180129350_SESTD1_NM_-|	33.9652	-4.1906	1.57246	-2.66499	0.00769909	0.203115	0	0	1.13987	5.29612	6.77266	55.4835	55.4656	74.0914	65.6719	75.7306	0	6.12947	-Inf	-0.372787	-Inf	SESTD1	-	-
chr17:57154035-57154087:mpeak_37559|chr17_57060282_57184266_TRIM37_NM_-|	59.4133	-2.87468	1.22319	-2.35015	0.018766	0.258536	1.10967	1.08756	9.11895	6.35534	1.84709	115.406	175.097	85.4901	103.804	94.8172	0.756354	6.09669	-2.39383	0.61706	-3.01089	TRIM37	-	-
chr6:44275767-44275895:mpeak_72275|chr6_44268448_44281063_AARS2_NM_-|	34.7668	-4.92231	1.77642	-2.77092	0.00558986	0.197157	0	0	1.13987	0	8.61975	104.309	71.779	64.9725	51.902	44.9458	0	6.03114	-Inf	0.706867	-Inf	AARS2	-	-
chr5:16478954-16479051:mpeak_65956|chr5_16475343_16617167_FAM134B_NM_-|	61.6734	-2.20994	0.954116	-2.31622	0.0205463	0.269252	2.21934	2.17512	5.69934	1.05922	9.23544	144.257	177.272	84.3503	85.7971	104.668	1.36674	5.8199	-1.27881	0.811449	-2.09026	FAM134B	-	-
chr16:53172314-53172376:mpeak_32740|chr16_53088944_53357931_CHD9_NM_+|	50.9915	-2.46035	1.17191	-2.09942	0.0357795	0.33729	2.21934	0	6.83921	5.29612	3.69418	102.09	116.369	99.1685	98.5078	75.7306	1.01591	5.78972	-2.24945	0.261273	-2.51072	CHD9	-	-
chr4:156648158-156648221:mpeak_65066|chr4_156587861_156651181_GUCY1A3_NM_+|	45.8	-4.84594	1.65761	-2.92345	0.00346176	0.18265	0	0	3.4196	8.47379	1.23139	76.5673	141.383	66.1124	82.6195	78.1934	0	5.78375	-Inf	0.526744	-Inf	GUCY1A3	-	-
chr3:24294752-24294809:mpeak_56847|chr3_24164616_24536313_THRB_NM_-|	29.9542	-4.68292	1.87607	-2.49613	0.0125557	0.222051	0	0	0	0	8.00405	90.993	61.991	50.1542	50.8427	37.5575	0	5.77683	-Inf	0.72789	-Inf	THRB	-	-
chr14:76362248-76362302:mpeak_26604|chr14_76127550_76420766_TTLL5_NM_+|	36.7728	-4.26289	1.93878	-2.19875	0.0278958	0.305405	0	0	0	11.6515	0.615696	62.1415	79.392	51.2941	75.2049	87.4289	0	5.73425	-Inf	-0.0110181	-Inf	TTLL5	-	-
chr11:3777394-3777444:mpeak_13247|chr11_3697606_3819022_NUP98_NM_-|	25.1159	-4.0429	1.71391	-2.35888	0.0183304	0.256792	0	0	3.4196	0	4.30987	41.0578	67.4288	27.3568	54.0204	53.5656	0	5.72797	-Inf	0.270131	-Inf	NUP98	-	-
chr3:136662107-136662163:mpeak_59807|chr3_136581049_136667100_NCK1_NM_+|	21.339	-3.71679	1.88161	-1.97533	0.0482309	0.384743	0	0	0	0	6.77266	32.1804	50.0278	33.0562	40.2505	51.1028	0	5.44384	-Inf	-0.0127788	-Inf	NCK1	-	-
chr19:38424063-38424113:mpeak_42830|chr19_38397860_38696736_SIPA1L3_NM_+|	23.4312	-4.03687	1.86403	-2.16567	0.0303362	0.315971	0	0	0	0	6.77266	58.8125	43.5024	53.5738	40.2505	31.4005	0	5.4084	-Inf	0.293459	-Inf	SIPA1L3	-	-
chr15:58958008-58958068:mpeak_29028|chr15_58889840_59042177_ADAM10_NM_-|	38.1095	-3.28828	1.62653	-2.02165	0.0432125	0.365475	0	0	11.3987	1.05922	3.07848	37.7288	40.2398	94.6091	100.626	92.3544	0	5.40227	-Inf	-1.29809	-Inf	ADAM10	-	-
chr18:13486284-13486334:mpeak_39566|chr18_13218728_13645125_LDLRAD4_NM_+|	30.2075	-4.01866	1.75602	-2.2885	0.0221081	0.278329	0	0	0	3.17767	6.15696	37.7288	76.1293	52.4339	40.2505	86.1975	0	5.21832	-Inf	-0.0668086	-Inf	LDLRAD4	-	-
chr7:135054317-135054367:mpeak_78493|chr7_135047938_135194875_CNOT4_NM_-|	34.9185	-4.3	1.59545	-2.69516	0.00703539	0.203115	0	0	4.55947	1.05922	4.30987	61.0319	87.0049	63.8326	57.1981	70.1894	0	5.19222	-Inf	0.215684	-Inf	CNOT4	-	-
chr12:62668379-62668441:mpeak_19589|chr12_62654120_62797972_USP15_NM_+|	34.7133	-4.15137	1.68094	-2.46967	0.0135237	0.226979	0	0	4.55947	0	6.15696	48.8255	80.4795	47.8745	84.7379	74.4992	0	5.17423	-Inf	-0.0946678	-Inf	USP15	-	-
chr16:14271793-14271922:mpeak_31488|chr16_14165169_14354765_MKL2_NM_+|	47.0898	-4.45207	1.56787	-2.83957	0.00451747	0.192099	0	0	2.27974	6.35534	6.15696	78.7866	87.0049	117.406	95.3301	77.5777	0	5.09518	-Inf	-0.223283	-Inf	MKL2	-	-
chr1:204443846-204443899:mpeak_7599|chr1_204394168_204459474_PIK3C2B_NM_-|	30.6881	-4.3494	1.90124	-2.28766	0.0221573	0.278472	0	0	0	0	8.00405	51.0448	89.18	54.7137	42.369	61.5696	0	5.04503	-Inf	0.406836	-Inf	PIK3C2B	-	-
chr18:44401212-44401262:mpeak_40098|chr18_44392575_44497495_PIAS2_NM_-|	30.8084	-4.17003	1.96907	-2.11776	0.0341953	0.330345	0	0	0	0	8.61975	59.9222	67.4288	31.9163	73.0864	67.1109	0	5.00817	-Inf	0.150411	-Inf	PIAS2	-	-
chrX:53230375-53230508:mpeak_87293|chrX_53222514_53254604_KDM5C_NM_-|	100.41	-4.11287	1.5901	-2.58655	0.00969432	0.209975	0	0	4.55947	0	3.69418	208.618	237.088	193.778	212.904	143.457	0	1.50029	-Inf	0.28126	-Inf	KDM5C	chrX:53230374:-;chrX:53230457:-	chrX_53201272_-
chrX:48754435-48754485:mpeak_87193|chrX_48751100_48755426_TIMM17B_NM_-|	63.726	-3.20627	1.57942	-2.03003	0.0423537	0.36249	0	0	1.13987	4.2369	4.30987	94.322	72.8666	125.386	166.298	168.701	0	2.10403	-Inf	-0.8764	-Inf	TIMM17B	chrX:48754436:-	chrX_48897155_-
chrX:10069329-10069379:mpeak_86567|chrX_9983794_10109474_WWC3_NM_+|	126.213	-3.20225	1.6021	-1.99878	0.045632	0.371979	0	0	0	2.11845	4.92557	185.315	201.199	219.995	343.189	305.385	0	0.810992	-Inf	-0.583157	-Inf	WWC3	chrX:10069377:+	-
chr9:96295332-96295388:mpeak_84399|chr9_96213977_96326510_FAM120A_NM_+|	5144.44	-3.02063	0.93583	-3.22775	0.00124767	0.125944	3.32901	0	7.97908	14.8291	12.9296	9413.33	12403.6	9097.29	10264.9	10226.1	0.0152588	0.120784	-2.83932	0.145385	-2.98471	FAM120A	chr9:96295385:+	chr9_93533100_+
chr9:93608185-93608243:mpeak_84252|chr9_93563961_93657809_SYK_NM_+|	58.3129	-3.1605	1.60152	-1.97344	0.0484451	0.38572	0	1.08756	2.27974	3.17767	9.85114	118.735	89.18	94.6091	120.752	143.457	0.52308	4.26638	-3.23021	-0.202297	-3.02791	SYK	chr9:93608239:+	chr9_90845954_+
chr9:88590018-88590170:mpeak_84122|chr9_88556056_88636815_NAA35_NM_+|	54.366	-3.47412	1.6293	-2.13228	0.0329842	0.326546	0	0	1.13987	5.29612	3.07848	61.0319	109.844	98.0287	114.396	150.846	0	2.61911	-Inf	-0.503136	-Inf	NAA35	chr9:88590160:+	chr9_85975143_+;chr9_85975245_+
chr9:136222775-136222825:mpeak_86102|chr9_136218837_136223361_SURF1_NM_-|	229.44	-4.07281	1.66062	-2.45258	0.0141835	0.229534	0	0	0	0	7.38836	528.203	433.937	395.534	494.658	434.682	0	0.557665	-Inf	0.123427	-Inf	SURF1	chr9:136222780:-	-
chr9:128310214-128310264:mpeak_85592|chr9_128201291_128469513_MAPKAP1_NM_-|	206.183	-4.2283	1.63139	-2.59184	0.00954637	0.209033	0	0	1.13987	0	8.00405	378.398	454.601	345.38	454.407	419.905	0	0.749691	-Inf	0.0348308	-Inf	MAPKAP1	chr9:128310213:-	chr9_125547933_-
chr8:17529418-17529476:mpeak_79532|chr8_17503648_17658426_MTUS1_NM_-|	69.7389	-4.30442	1.55543	-2.76734	0.00565158	0.197157	0	0	6.83921	2.11845	3.07848	152.025	129.42	145.903	132.403	125.602	0	2.97992	-Inf	0.0637862	-Inf	MTUS1	chr8:17529419:-	-
chr8:144667343-144667406:mpeak_82629|chr8_144662000_144679845_EEF1D_NM_-|	2086.18	-4.16709	1.55556	-2.67883	0.007388	0.203115	0	0	0	8.47379	1.84709	4308.85	4612.35	3804.88	4340.7	3784.68	0	0.0865101	-Inf	0.165646	-Inf	EEF1D	chr8:144667341:-	chr8_143585173_-
chr8:141620980-141621055:mpeak_82489|chr8_141542251_141645646_AGO2_NM_-|	257.421	-3.08214	1.53046	-2.01387	0.0440233	0.368415	0	1.08756	2.27974	6.35534	3.69418	515.997	590.546	467.346	530.671	456.231	0.0982846	0.84781	-2.91796	0.190748	-3.1087	AGO2	chr8:141620998:-	chr8_140610897_-
chr8:109456876-109456931:mpeak_81833|chr8_109455852_109498740_EMC2_NM_+|	155.284	-5.13484	1.61434	-3.18078	0.00146881	0.127941	0	0	3.4196	3.17767	11.6982	226.373	411.098	250.771	323.063	323.241	0	2.03946	-Inf	0.0920935	-Inf	EMC2	chr8:109456933:+	chr8_108444684_+;chr8_108444740_+
chr8:101716323-101716578:mpeak_81544|chr8_101715587_101734315_PABPC1_NM_-|	1430.83	-1.20823	0.591315	-2.04329	0.0410239	0.358386	6.65802	5.43781	10.2588	8.47379	14.7767	2817.45	3511.73	2686.67	2637.47	2609.32	0.191112	0.42238	-0.88509	0.259033	-1.14412	PABPC1	chr8:101716317:-;chr8:101716342:-;chr8:101716416:-;chr8:101716455:-;chr8:101716508:-	chr8_100704116_-;chr8_100704216_-
chr7:6475804-6475854:mpeak_75342|chr7_6449666_6487643_DAGLB_NM_-|	29.0743	-3.87126	1.92268	-2.01347	0.0440654	0.368415	0	0	0	0	8.00405	63.2512	46.7651	38.7555	77.3233	56.6441	0	4.63404	-Inf	-0.0657792	-Inf	DAGLB	chr7:6475799:-	chr7_6436173_-
chr7:6098069-6098119:mpeak_75322|chr7_6064432_6098860_EIF2AK1_NM_-|	558.242	-4.01135	1.57162	-2.55237	0.0106992	0.215362	0	0	1.13987	1.05922	5.54127	959.865	1344.23	1031.58	1115.36	1123.65	0	0.236666	-Inf	0.0796092	-Inf	EIF2AK1	chr7:6098064:-	-
chr7:32547069-32547123:mpeak_75885|chr7_32535037_32623403_AVL9_NM_+|	193.246	-4.48104	1.57571	-2.84382	0.00445757	0.191237	0	0	5.69934	0	4.92557	357.314	503.541	303.205	356.958	400.818	0	1.00142	-Inf	0.283404	-Inf	AVL9	chr7:32547122:+	-
chr7:135055701-135055756:mpeak_78494|chr7_135047938_135194875_CNOT4_NM_-|	34.8328	-4.1779	1.59745	-2.61536	0.00891344	0.206155	0	0	1.13987	4.2369	3.69418	61.0319	87.0049	63.8326	57.1981	70.1894	0	4.74372	-Inf	0.215684	-Inf	CNOT4	chr7:135055703:-	chr7_135370954_-
chr6:36648579-36648638:mpeak_71933|chr6_36644236_36653527_CDKN1A_NM_+|	875.732	-1.65758	0.81164	-2.04226	0.0411256	0.358386	6.65802	5.43781	5.69934	10.5922	6.15696	1742.18	3777.1	734.075	1303.9	1165.51	0.219156	0.700752	-0.30715	1.3698	-1.67695	CDKN1A	chr6:36648606:+;chr6:36648636:+	chr6_36680865_+
chr6:34847869-34847920:mpeak_71829|chr6_34846497_34855848_TAF11_NM_-|	336.368	-4.14369	1.56458	-2.64843	0.00808669	0.203115	0	0	4.55947	0	4.92557	632.512	744.979	543.717	744.634	688.348	0	0.479842	-Inf	0.063912	-Inf	TAF11	chr6:34847819:-;chr6:34847868:-	chr6_34880091_-
chr6:33178790-33178841:mpeak_71673|chr6_33176285_33180074_RING1_NM_+|	161.413	-4.4125	1.54871	-2.84914	0.0043838	0.190925	0	0	1.13987	4.2369	5.54127	379.507	291.466	331.702	290.227	310.311	0	1.17116	-Inf	0.110517	-Inf	RING1	chr6:33178842:+	chr6_33211064_+
chr6:1690166-1690221:mpeak_70334|chr6_1624466_2245868_GMDS_NM_-|	195.081	-4.34112	1.61542	-2.68729	0.00720337	0.203115	0	0	3.4196	9.53301	0.615696	398.372	381.734	336.261	464.999	355.872	0	1.17258	-Inf	0.0161493	-Inf	GMDS	chr6:1690169:-	chr6_1689937_-
chr6:15249981-15250044:mpeak_70713|chr6_15246205_15520299_JARID2_NM_+|	202.703	-1.98527	0.716763	-2.76977	0.00560961	0.197157	6.65802	1.08756	7.97908	14.8291	8.00405	446.088	554.656	321.443	351.662	314.621	0.773983	3.11952	-1.4071	0.603852	-2.01095	JARID2	chr6:15250042:+	chr6_15249810_+
chr6:152132252-152132556:mpeak_74491|chr6_152011630_152419866_ESR1_NM_+|	1234.49	-1.09331	0.413905	-2.64145	0.00825514	0.203115	23.3031	19.5761	17.098	19.066	26.4749	3779.54	3386.67	1805.55	1639.68	1627.9	0.598353	1.23472	0.0381787	1.08329	-1.04512	ESR1	chr6:152132393:+;chr6:152132516:+	chr6_151811256_+;chr6_151811379_+
chr6:151816353-151816409:mpeak_74440|chr6_151815174_151939081_CCDC170_NM_+|	151.191	-2.09081	0.969668	-2.15621	0.0310669	0.318061	2.21934	1.08756	3.4196	6.35534	8.61975	311.817	309.955	254.191	334.715	279.526	0.531851	2.11815	-1.89078	0.102937	-1.99371	CCDC170	chr6:151816406:+	chr6_151495269_+
chr6:151736552-151736606:mpeak_74415|chr6_151726402_151773316_RMND1_NM_-|	67.7856	-4.6749	1.56962	-2.97836	0.00289799	0.175849	0	0	0	4.2369	6.15696	165.341	146.821	111.707	111.219	132.375	0	2.92537	-Inf	0.398217	-Inf	RMND1	chr6:151736553:-	chr6_151415419_-
chr6:150175581-150175725:mpeak_74365|chr6_150141839_150185480_LRP11_NM_-|	277.043	-3.36152	1.55605	-2.16028	0.0307507	0.316676	1.10967	0	1.13987	9.53301	1.84709	645.828	714.528	450.248	436.4	509.797	0.0815721	0.896561	-2.91107	0.547188	-3.45825	LRP11	chr6:150175668:-	chr6_149854443_-;chr6_149854537_-
chr6:136554235-136554289:mpeak_73939|chr6_136552526_136571449_MTFR2_NM_-|	73.3721	-3.10189	1.57635	-1.96776	0.0490957	0.388294	0	0	3.4196	1.05922	3.69418	104.309	104.406	153.882	161.002	201.948	0	1.58136	-Inf	-0.723201	-Inf	MTFR2	chr6:136554236:-	chr6_136233103_-
chr6:10406368-10406418:mpeak_70596|chr6_10398938_10419797_TFAP2A_NM_-|	173.92	-4.35296	1.5434	-2.82038	0.00479665	0.194494	0	0	2.27974	3.17767	8.00405	324.024	284.941	363.618	419.453	333.707	0	1.20538	-Inf	-0.289949	-Inf	TFAP2A	chr6:10406367:-	chr6_10406119_-
chr5:36895788-36895838:mpeak_66223|chr5_36876860_37063891_NIPBL_NM_+|	80.7981	-4.03622	1.60492	-2.51491	0.0119064	0.220256	0	0	4.55947	1.05922	3.69418	126.502	202.286	144.763	132.403	192.713	0	1.98197	-Inf	0.0698337	-Inf	NIPBL	chr5:36895835:+	chr5_36895733_+
chr5:179136399-179136504:mpeak_70139|chr5_179125929_179155591_CANX_NM_+|	2271.95	-4.0828	1.56473	-2.60927	0.0090736	0.206791	0	0	5.69934	5.29612	0	4635.09	5139.81	3951.92	4538.77	4442.86	0	0.0850149	-Inf	0.180998	-Inf	CANX	chr5:179136479:+	chr5_179709476_+
chr5:171317674-171317727:mpeak_69741|chr5_171291105_171433877_FBXW11_NM_-|	71.438	-3.9951	1.59364	-2.5069	0.0121796	0.220256	0	0	2.27974	3.17767	6.15696	95.4317	142.47	116.267	181.127	167.469	0	2.49845	-Inf	-0.381475	-Inf	FBXW11	chr5:171317676:-	-
chr5:153736972-153737024:mpeak_69464|chr5_153570294_153796373_GALNT10_NM_+|	141.373	-3.91167	1.54234	-2.5362	0.0112063	0.219841	0	0	3.4196	5.29612	2.46279	258.553	254.489	273.568	316.708	299.228	0	1.25671	-Inf	-0.208961	-Inf	GALNT10	chr5:153737028:+	-
chr5:153712939-153712999:mpeak_69461|chr5_153570294_153796373_GALNT10_NM_+|	142.489	-2.48928	1.1175	-2.22755	0.0259105	0.296776	1.10967	1.08756	4.55947	6.35534	9.23544	258.553	254.489	273.568	316.708	299.228	0.428275	2.26533	-2.61208	-0.208961	-2.40312	GALNT10	chr5:153712990:+	-
chr5:14687993-14688113:mpeak_65924|chr5_14664782_14692962_OTULIN_NM_+|	80.4683	-3.95366	1.56066	-2.53333	0.0112984	0.219841	0	0	2.27974	6.35534	1.84709	150.915	159.871	174.4	155.706	153.308	0	2.16836	-Inf	-0.0523726	-Inf	OTULIN	chr5:14688013:+;chr5:14688044:+;chr5:14688084:+;chr5:14688120:+	chr5_14687934_+;chr5_14688011_+
chr5:107633437-107633490:mpeak_67873|chr5_107197561_107717799_FBXL17_NM_-|	103.971	-3.53646	1.60776	-2.19962	0.0278336	0.305208	0	0	1.13987	4.2369	3.69418	130.941	210.987	170.98	254.214	263.518	0	1.31709	-Inf	-0.425246	-Inf	FBXL17	chr5:107633436:-;chr5:107633475:-	chr5_108297736_-;chr5_108297775_-
chr5:10400981-10401035:mpeak_65849|chr5_10353750_10433705_MARCH6_NM_+|	695.884	-4.40056	1.61039	-2.7326	0.00628358	0.200035	0	0	0	1.05922	7.38836	1425.93	1697.68	1037.28	1406.65	1382.85	0	0.220749	-Inf	0.292044	-Inf	MARCH6	chr5:10401032:+	chr5_10400923_+
chr5:10377602-10377652:mpeak_65844|chr5_10353750_10433705_MARCH6_NM_+|	696.006	-4.15948	1.56891	-2.65119	0.00802086	0.203115	0	0	5.69934	2.11845	1.84709	1425.93	1697.68	1037.28	1406.65	1382.85	0	0.252559	-Inf	0.292044	-Inf	MARCH6	chr5:10377653:+	chr5_10377540_+
chr4:48833947-48834068:mpeak_62927|chr4_48833059_48862741_OCIAD1_NM_+|	784.974	-4.25945	1.5612	-2.72832	0.00636574	0.200035	0	0	5.69934	3.17767	4.30987	1118.55	1794.48	1394.06	1725.48	1803.99	0	0.267834	-Inf	-0.172212	-Inf	OCIAD1	chr4:48834034:+	chr4_48832015_+
chr4:39829419-39829511:mpeak_62715|chr4_39827108_39979576_PDS5A_NM_-|	297.614	-3.44513	1.53034	-2.25121	0.0243722	0.288575	1.10967	0	9.11895	5.29612	5.54127	452.746	675.375	576.773	660.956	589.221	0.0983645	1.09233	-3.58368	-0.110553	-3.47313	PDS5A	chr4:39829448:-	chr4_39827824_-
chr4:125626493-125626582:mpeak_64502|chr4_125588669_125633887_ANKRD50_NM_-|	194.575	-1.60567	0.790428	-2.03139	0.0422152	0.362453	2.21934	4.35024	14.8183	5.29612	11.6982	438.32	296.904	398.954	337.892	435.297	0.893549	2.71406	-1.69076	-0.0879311	-1.60283	ANKRD50	chr4:125626503:-	chr4_124705340_-
chr4:106387754-106387804:mpeak_64097|chr4_106290910_106395227_PPA2_NM_-|	237.792	-4.17628	1.58572	-2.63369	0.00844627	0.203161	0	0	2.27974	4.2369	4.30987	373.959	561.182	348.8	563.507	519.648	0	0.756065	-Inf	-0.0297681	-Inf	PPA2	chr4:106387750:-	chr4_105466597_-
chr3:3209107-3209164:mpeak_56206|chr3_3192729_3221401_CRBN_NM_-|	145.111	-4.31561	1.57902	-2.73309	0.00627432	0.200035	0	0	0	2.11845	4.92557	378.398	326.268	226.834	285.99	226.576	0	0.952666	-Inf	0.515546	-Inf	CRBN	chr3:3209109:-	chr3_3167427_-
chr3:197427305-197427370:mpeak_61698|chr3_197402067_197476570_KIAA0226_NM_-|	139.276	-4.10521	1.66318	-2.4683	0.0135758	0.226979	0	0	1.13987	0	8.61975	291.843	225.125	310.044	302.938	253.051	0	1.12693	-Inf	-0.159384	-Inf	KIAA0226	chr3:197427256:-	chr3_197700382_-;chr3_197700464_-
chr3:195632384-195632455:mpeak_61496|chr3_195591058_195635880_TNK2_NM_-|	76.0506	-3.99724	1.62432	-2.46087	0.0138599	0.227581	0	0	5.69934	0	4.30987	117.625	171.835	110.567	188.542	161.928	0	2.17102	-Inf	-0.0865581	-Inf	TNK2	chr3:195632403:-	chr3_195905539_-
chr3:15105176-15105226:mpeak_56641|chr3_15094140_15106816_MRPS25_NM_-|	803.747	-4.33998	1.53108	-2.83459	0.00458851	0.194355	0	0	3.4196	3.17767	3.69418	1838.72	1690.07	1485.25	1568.71	1444.42	0	0.228781	-Inf	0.234731	-Inf	MRPS25	chr3:15105177:-	chr3_15063652_-
chr3:141131970-141132023:mpeak_59939|chr3_141043054_141161230_ZBTB38_NM_+|	85.656	-3.91363	1.56278	-2.50427	0.0122705	0.220522	0	1.08756	7.97908	1.05922	3.07848	271.869	226.213	127.665	100.626	116.982	0.21835	3.50933	-2.89288	1.1136	-4.00648	ZBTB38	chr3:141132022:+	chr3_141413179_+
chr3:10012143-10012193:mpeak_56399|chr3_10005881_10028522_EMC3_NM_-|	414.334	-4.84521	1.7207	-2.81583	0.00486515	0.194624	0	0	0	2.11845	12.3139	998.703	718.878	789.929	922.584	698.815	0	0.598524	-Inf	0.095513	-Inf	EMC3	chr3:10012141:-	chr3_9970459_-
chr22:50248145-50248210:mpeak_56099|chr22_50247496_50276981_ZBED4_NM_+|	105.983	-1.86743	0.791436	-2.35955	0.018297	0.256657	4.43868	2.17512	7.97908	9.53301	3.69418	291.843	275.153	129.945	162.061	173.011	1.16646	4.56032	-1.09598	0.871019	-1.96699	ZBED4	chr22:50248200:+	chr22_49854550_+
chr22:41998084-41998193:mpeak_55814|chr22_41997194_42017061_DESI1_NM_-|	110.7	-4.17423	1.61491	-2.58481	0.00974335	0.209975	0	0	3.4196	0	4.92557	297.392	187.061	210.876	238.325	165.007	0	1.35869	-Inf	0.24259	-Inf	DESI1	chr22:41998088:-	chr22_41602080_-
chr22:32341427-32341492:mpeak_55412|chr22_32340478_32352125_YWHAH_NM_+|	574.545	-4.2752	1.60258	-2.6677	0.00763721	0.203115	0	0	4.55947	7.41457	0	1388.2	1093	1217.38	1052.87	982.036	0	0.368173	-Inf	0.194546	-Inf	YWHAH	chr22:32341489:+	chr22_31945502_+
chr21:46376126-46376185:mpeak_54514|chr21_46359954_46396594_FAM207A_NM_+|	301.346	-1.55594	0.751061	-2.07165	0.0382979	0.346446	5.54835	2.17512	7.97908	8.47379	11.6982	791.195	513.329	563.095	633.416	476.549	0.592053	1.68261	-1.28091	0.225997	-1.5069	FAM207A	chr21:46376179:+	chr21_44956261_+
chr21:45462401-45462458:mpeak_54433|chr21_45432205_45523173_TRAPPC10_NM_+|	100.703	-1.46938	0.725258	-2.02601	0.042764	0.363936	5.54835	2.17512	6.83921	9.53301	8.00405	197.521	256.664	172.12	188.542	160.081	1.70051	4.68106	-1.07319	0.387673	-1.46087	TRAPPC10	chr21:45462453:+	chr21_44042571_+
chr21:44265281-44265334:mpeak_54330|chr21_44263391_44299699_WDR4_NM_-|	215.347	-2.36684	1.16442	-2.03263	0.0420901	0.361667	0	2.17512	7.97908	5.29612	2.46279	481.597	460.038	331.702	468.177	394.046	0.230994	1.31817	-2.27012	0.242492	-2.51261	WDR4	chr21:44265282:-	-
chr21:42583943-42583995:mpeak_54255|chr21_42539727_42647297_BACE2_NM_+|	160.481	-3.95903	1.55262	-2.54991	0.0107752	0.215884	0	0	0	6.35534	3.07848	318.475	314.305	313.464	301.879	347.253	0	0.980041	-Inf	-0.0202616	-Inf	BACE2	chr21:42583998:+	chr21_41212066_+
chr20:61293855-61293911:mpeak_53464|chr20_61273796_61303101_SLCO4A1_NM_+|	89.4726	-4.22154	1.56175	-2.70309	0.00686988	0.203115	0	0	5.69934	4.2369	2.46279	162.012	185.973	192.638	197.016	144.689	0	2.32043	-Inf	-0.0337765	-Inf	SLCO4A1	chr20:61293908:+;chr20:61293937:+	chr20_62662583_+
chr20:46324011-46324104:mpeak_52715|chr20_46287136_46415360_SULF2_NM_-|	409.357	-3.81013	1.54884	-2.45999	0.0138941	0.227581	0	0	1.13987	2.11845	4.30987	784.537	839.597	808.167	780.648	873.057	0	0.307416	-Inf	-0.0151224	-Inf	SULF2	chr20:46324009:-;chr20:46324053:-	chr20_47695267_-;chr20_47695310_-
chr20:45317146-45317216:mpeak_52613|chr20_45315870_45318276_TP53RK_NM_-|	172.814	-3.60126	1.769	-2.03576	0.0417745	0.359813	0	0	1.13987	9.53301	0	215.276	359.983	347.66	384.498	410.054	0	0.934405	-Inf	-0.404585	-Inf	TP53RK	chr20:45317160:-	-
chr20:40083083-40083133:mpeak_52381|chr20_40034129_40247133_CHD6_NM_-|	31.1794	-4.26337	1.74566	-2.44227	0.0145952	0.231148	0	0	0	1.05922	7.38836	55.4835	77.2168	66.1124	61.435	43.0987	0	4.95035	-Inf	0.222127	-Inf	CHD6	chr20:40083080:-	chr20_41454449_-
chr20:39666328-39666404:mpeak_52333|chr20_39657461_39751834_TOP1_NM_+|	828.068	-3.67629	1.66529	-2.20759	0.0272725	0.301856	0	0	0	0	6.15696	1195.12	2071.8	1611.77	1593.07	1802.76	0	0.122952	-Inf	-0.0312277	-Inf	TOP1	chr20:39666406:+	-
chr20:37575464-37575516:mpeak_52319|chr20_37554954_37580181_FAM83D_NM_+|	68.6372	-3.34616	1.69273	-1.97678	0.0480665	0.384283	0	0	1.13987	1.05922	7.38836	67.6899	116.369	131.085	138.758	222.882	0	1.9458	-Inf	-0.835653	-Inf	FAM83D	chr20:37575517:+	chr20_38946873_+
chr2:55897707-55897764:mpeak_46239|chr2_55863527_55921045_PNPT1_NM_-|	49.3153	-3.81125	1.74264	-2.18706	0.0287385	0.30984	0	0	0	0	7.38836	96.5413	90.2676	100.308	111.219	87.4289	0	2.47139	-Inf	-0.0934065	-Inf	PNPT1	chr2:55897712:-	-
chr2:55841307-55841362:mpeak_46222|chr2_55777142_55844860_SMEK2_NM_-|	133.282	-3.94866	1.61023	-2.45223	0.0141973	0.229534	0	0	4.55947	0	6.77266	164.231	277.328	262.17	335.774	281.989	0	1.28784	-Inf	-0.409823	-Inf	SMEK2	chr2:55841311:-	-
chr2:55838583-55838644:mpeak_46220|chr2_55777142_55844860_SMEK2_NM_-|	133.721	-4.28127	1.58737	-2.69708	0.006995	0.203115	0	0	9.11895	1.05922	5.54127	164.231	277.328	262.17	335.774	281.989	0	1.78644	-Inf	-0.409823	-Inf	SMEK2	chr2:55838587:-	chr2_55611451_-
chr2:236716719-236716771:mpeak_50982|chr2_236402732_237032562_AGAP1_NM_+|	75.3624	-4.10366	1.57801	-2.60053	0.00930804	0.208581	0	0	3.4196	0	4.30987	146.476	188.148	133.365	138.758	139.147	0	1.87942	-Inf	0.287419	-Inf	AGAP1	chr2:236716770:+	chr2_235808125_+
chr2:236716528-236716587:mpeak_50981|chr2_236402732_237032562_AGAP1_NM_+|	76.8501	-1.84957	0.914495	-2.0225	0.0431245	0.365475	1.10967	3.26268	1.13987	8.47379	8.61975	146.476	188.148	133.365	138.758	139.147	1.30664	4.43344	-1.47514	0.287419	-1.76256	AGAP1	chr2:236716550:+;chr2:236716584:+	chr2_235807903_+;chr2_235807954_+
chr2:224762722-224762837:mpeak_50662|chr2_224743447_224810104_WDFY1_NM_-|	125.394	-2.74721	1.14855	-2.39191	0.0167611	0.247105	2.21934	0	5.69934	8.47379	4.30987	281.856	278.416	267.869	189.601	215.494	0.396119	2.74651	-2.47303	0.320561	-2.79359	WDFY1	chr2:224762781:-	chr2_223898067_-
chr2:197655640-197655690:mpeak_49797|chr2_197629409_197664492_GTF3C3_NM_-|	64.9343	-4.17286	1.58702	-2.62936	0.0085546	0.203161	0	0	1.13987	4.2369	5.54127	102.09	141.383	102.588	148.291	144.073	0	2.76439	-Inf	-0.112957	-Inf	GTF3C3	chr2:197655620:-	-
chr2:192233985-192234045:mpeak_49742|chr2_192110106_192288562_MYO1B_NM_+|	219.01	-3.16783	1.57672	-2.00913	0.044523	0.369066	0	0	0	2.11845	6.15696	287.405	293.641	615.529	537.026	448.227	0	0.51696	-Inf	-0.87709	-Inf	MYO1B	chr2:192234034:+	chr2_191369305_+
chr2:1656847-1656904:mpeak_44678|chr2_1638095_1748319_PXDN_NM_-|	743.63	-4.84813	1.54463	-3.1387	0.00169699	0.138254	0	0	0	9.53301	4.30987	1553.54	1823.84	1282.35	1495.62	1267.1	0	0.342216	-Inf	0.324699	-Inf	PXDN	chr2:1656853:-	chr2_1653075_-
chr19:53223271-53223325:mpeak_44051|chr19_53210117_53238307_ZNF611_NM_-|	61.9785	-4.31507	1.84058	-2.3444	0.0190577	0.260313	0	0	10.2588	2.11845	0	157.573	95.7054	150.463	87.9156	115.751	0	3.49513	-Inf	0.101412	-Inf	ZNF611	chr19:53223269:-	chr19_52720018_-
chr19:49409288-49409341:mpeak_43656|chr19_49403306_49425574_NUCB1_NM_+|	90.4646	-2.14379	1.05871	-2.0249	0.0428777	0.364136	4.43868	0	6.83921	8.47379	3.69418	317.366	137.033	134.504	179.009	113.288	0.976826	4.4534	-1.51338	0.675355	-2.18873	NUCB1	chr19:49409339:+	chr19_48906083_+
chr19:46331395-46331445:mpeak_43404|chr19_46318955_46366548_SYMPK_NM_-|	224.84	-3.77661	1.62743	-2.32059	0.0203088	0.267507	0	0	0	1.05922	5.54127	569.261	336.056	437.709	481.947	416.826	0	0.49387	-Inf	0.0230168	-Inf	SYMPK	chr19:46331389:-	chr19_45828157_-
chr19:42365656-42365766:mpeak_43128|chr19_42363987_42375418_RPS19_NM_+|	3673.48	-4.18356	1.58677	-2.63653	0.00837582	0.203161	0	0	5.69934	5.29612	0	7209.53	9102.89	6000.27	7597.81	6813.29	0	0.0538693	-Inf	0.26156	-Inf	RPS19	chr19:42365741:+	chr19_41861668_+
chr18:9103742-9103868:mpeak_39381|chr18_9102627_9134183_NDUFV2_NM_+|	472.87	-2.08251	0.869246	-2.39576	0.0165859	0.247105	2.21934	2.17512	6.83921	7.41457	9.23544	878.859	1170.22	746.614	892.926	1012.2	0.214461	0.885803	-1.83328	0.212994	-2.04627	NDUFV2	chr18:9103805:+	chr18_9103806_+
chr18:72164970-72165054:mpeak_40484|chr18_72163499_72187233_CNDP2_NM_+|	155.038	-3.18336	1.19588	-2.66193	0.00776937	0.203115	0	2.17512	11.3987	14.8291	3.69418	328.462	301.254	359.059	249.977	279.526	0.345413	3.36746	-3.19708	0.0881942	-3.28527	CNDP2	chr18:72165055:+	chr18_74497819_+
chr17:7573170-7573286:mpeak_35011|chr17_7573008_7590868_TP53_NM_-|	173.733	-3.56501	1.60774	-2.21741	0.0265953	0.300163	0	1.08756	12.5386	1.05922	4.92557	276.308	446.988	306.625	291.287	396.508	0.150362	1.86273	-3.50521	0.125693	-3.63091	TP53	chr17:7573141:-;chr17:7573201:-	chr17_7669823_-
chr17:65171376-65171434:mpeak_38313|chr17_65074702_65241319_HELZ_NM_-|	151.488	-3.03284	1.53152	-1.98028	0.0476722	0.383401	1.10967	0	2.27974	3.17767	8.00405	261.882	295.817	298.645	333.656	310.311	0.198973	1.4281	-3.01567	-0.172215	-2.84345	HELZ	chr17:65171382:-	chr17_67175267_-
chr17:62773806-62773861:mpeak_38245|chr17_62746126_62778117_LOC146880_NR_-|	371.9	-3.47071	1.57901	-2.19802	0.0279476	0.305405	0	0	2.27974	6.35534	1.23139	525.984	713.44	704.439	889.748	875.52	0	0.3995	-Inf	-0.409708	-Inf	LOC146880	chr17:62773806:-;chr17:62773856:-	chr17_64777689_-
chr17:57788768-57788825:mpeak_37667|chr17_57784862_57917128_VMP1_NM_+|	979.988	-3.954	1.53678	-2.57292	0.0100845	0.21109	0	0	0	4.2369	5.54127	1703.34	1824.93	1927.52	2111.03	2223.28	0	0.156155	-Inf	-0.24266	-Inf	VMP1	chr17:57788824:+	chr17_59711463_+
chr17:57752668-57752729:mpeak_37644|chr17_57697049_57771088_CLTC_NM_+|	2290.63	-3.98314	1.65087	-2.41275	0.0158329	0.244179	0	0	9.11895	2.11845	0.615696	3145.92	5569.4	4133.16	4998.48	5047.48	0	0.0835954	-Inf	-0.11718	-Inf	CLTC	chr17:57752722:+	chr17_59675364_+
chr17:45757674-45757724:mpeak_37007|chr17_45727203_45759769_KPNB1_NM_+|	655.72	-3.92257	1.60917	-2.43764	0.0147835	0.233632	0	0	0	3.17767	4.30987	1271.68	1484.52	1558.2	865.386	1369.92	0	0.197378	-Inf	0.124111	-Inf	KPNB1	chr17:45757726:+	chr17_47680361_+
chr17:43195965-43196070:mpeak_36869|chr17_43190072_43209900_PLCD3_NM_-|	59.7194	-4.08987	1.61375	-2.53439	0.0112642	0.219841	0	0	0	5.29612	4.30987	89.8833	146.821	98.0287	118.633	134.222	0	2.73766	-Inf	0.0170546	-Inf	PLCD3	chr17:43195965:-	chr17_45118606_-
chr17:38796821-38796877:mpeak_36507|chr17_38785245_38804103_SMARCE1_NM_-|	485.427	-1.7094	0.720214	-2.37346	0.0176222	0.252102	3.32901	3.26268	12.5386	7.41457	12.3139	909.93	999.469	850.342	1080.41	975.263	0.345224	1.11035	-1.70638	-0.0209605	-1.68542	SMARCE1	chr17:38796826:-	chr17_40640575_-
chr17:3865691-3865772:mpeak_34682|chr17_3828735_3867758_ATP2A3_NM_-|	218.054	-1.30529	0.608803	-2.14403	0.0320304	0.321249	5.54835	6.52537	7.97908	14.8291	14.7767	523.764	405.66	377.296	425.808	398.355	1.29905	3.12827	-1.05332	0.214584	-1.26791	ATP2A3	chr17:3865717:-	chr17_3962424_-
chr17:3725796-3725854:mpeak_34674|chr17_3716573_3749545_C17orf85_NM_-|	159.824	-4.55088	1.58663	-2.86826	0.0041274	0.184529	0	0	7.97908	7.41457	1.23139	336.23	278.416	283.827	391.913	291.224	0	1.7193	-Inf	-0.068745	-Inf	C17orf85	chr17:3725798:-	-
chr17:35762562-35762624:mpeak_36236|chr17_35444374_35766902_ACACA_NM_-|	63.8942	-4.64453	1.79703	-2.58457	0.00975017	0.209975	0	0	1.13987	9.53301	0	136.489	182.71	103.728	88.9748	116.367	0	3.45323	-Inf	0.631491	-Inf	ACACA	chr17:35762568:-	chr17_37402459_-
chr17:29311205-29311255:mpeak_36002|chr17_29297955_29325679_RNF135_NM_+|	53.2555	-4.19915	1.65609	-2.53557	0.0112264	0.219841	0	0	0	0	6.15696	133.16	120.719	91.1895	88.9748	92.3544	0	2.25928	-Inf	0.482752	-Inf	RNF135	chr17:29311260:+	-
chr17:26966481-26966543:mpeak_35793|chr17_26942264_26972177_KIAA0100_NM_-|	267.074	-4.02956	1.56946	-2.56748	0.0102441	0.212605	0	0	0	6.35534	3.07848	597.003	489.402	455.947	612.231	506.718	0	0.599012	-Inf	0.0492675	-Inf	KIAA0100	chr17:26966500:-	chr17_28639480_-
chr16:85779995-85780045:mpeak_34013|chr16_85741672_85784689_C16orf74_NM_-|	89.6746	-4.45798	1.65759	-2.68944	0.00715713	0.203115	0	0	3.4196	0	6.15696	147.586	256.664	117.406	164.18	201.333	0	1.98306	-Inf	0.328432	-Inf	C16orf74	chr16:85779985:-	-
chr16:84119580-84119636:mpeak_33879|chr16_84088250_84150548_MBTPS1_NM_-|	324.873	-3.53532	1.52269	-2.32176	0.0202459	0.267242	1.10967	0	7.97908	3.17767	5.54127	673.57	730.841	543.717	706.502	576.292	0.0790132	0.914203	-3.32651	0.205837	-3.53235	MBTPS1	chr16:84119584:-	chr16_84085981_-
chr16:74691775-74691939:mpeak_33620|chr16_74657969_74700779_RFWD3_NM_-|	457.706	-1.8127	0.755765	-2.3985	0.0164623	0.247105	2.21934	3.26268	10.2588	7.41457	15.3924	815.608	800.445	933.552	979.782	1009.13	0.339223	1.13144	-2.0076	-0.269747	-1.73785	RFWD3	chr16:74691779:-;chr16:74691878:-	chr16_74657884_-;chr16_74657975_-
chr16:69201113-69201168:mpeak_33218|chr16_69166498_69202723_CIRH1A_NM_+|	184.711	-3.64501	1.62076	-2.24896	0.0245151	0.288754	0	0	0	1.05922	6.15696	337.34	327.356	291.806	436.4	446.995	0	0.614038	-Inf	-0.23718	-Inf	CIRH1A	chr16:69201165:+	chr16_69167260_+
chr16:67077976-67078028:mpeak_33023|chr16_67063049_67132612_CBFB_NM_+|	196.739	-4.02865	1.55759	-2.58647	0.00969655	0.209975	0	0	1.13987	6.35534	6.77266	249.676	339.319	375.017	509.487	479.627	0	1.04593	-Inf	-0.626692	-Inf	CBFB	chr16:67078031:+	-
chr16:400503-400564:mpeak_30659|chr16_338248_402676_AXIN1_NM_-|	41.8754	-4.05514	1.5751	-2.57453	0.0100378	0.21109	0	0	5.69934	1.05922	4.92557	74.3479	71.779	75.2313	84.7379	100.974	0	4.47765	-Inf	-0.251552	-Inf	AXIN1	chr16:400512:-	chr16_350513_-
chr16:3500113-3500164:mpeak_31065|chr16_3493667_3535466_NAA60_NM_+|	74.59	-4.23603	1.57889	-2.68291	0.00729845	0.203115	0	0	1.13987	2.11845	5.54127	168.67	147.908	131.085	166.298	123.139	0	2.09254	-Inf	0.175342	-Inf	NAA60	chr16:3500165:+	chr16_3450164_+
chr16:31725494-31725573:mpeak_32518|chr16_31724549_31770677_ZNF720_NM_+|	158.458	-4.37771	1.56724	-2.79326	0.00521794	0.197157	0	0	2.27974	6.35534	3.69418	373.959	266.452	328.282	248.918	354.641	0	1.32311	-Inf	0.0438781	-Inf	ZNF720	chr16:31725576:+	chr16_31714252_+
chr16:24960292-24960344:mpeak_32056|chr16_24931581_25026699_ARHGAP17_NM_-|	43.485	-4.38891	1.59368	-2.75395	0.00588803	0.19874	0	0	4.55947	1.05922	3.69418	103.199	96.7929	94.6091	65.6719	65.2638	0	4.12906	-Inf	0.411493	-Inf	ARHGAP17	chr16:24960298:-	-
chr16:2218457-2218508:mpeak_30852|chr16_2205798_2226560_TRAF7_NM_+|	354.877	-2.28909	1.15313	-1.9851	0.0471332	0.379914	2.21934	0	4.55947	4.2369	6.15696	696.873	749.33	543.717	814.543	727.137	0.15346	0.717049	-2.1673	0.0569097	-2.22421	TRAF7	chr16:2218511:+	chr16_2168515_+
chr16:14732191-14732308:mpeak_31527|chr16_14726667_14761491_BFAR_NM_+|	180.256	-3.87682	1.5359	-2.52413	0.0115985	0.220256	0	0	2.27974	3.17767	5.54127	322.914	269.715	398.954	400.387	399.587	0	0.917376	-Inf	-0.43158	-Inf	BFAR	chr16:14732309:+	chr16_14638460_+
chr15:93536584-93536634:mpeak_30410|chr15_93443550_93567601_CHD2_NM_+|	36.9725	-3.84001	1.62925	-2.35692	0.0184272	0.25696	0	0	2.27974	3.17767	3.69418	44.3868	92.4427	69.532	81.5602	72.6522	0	4.0902	-Inf	-0.124509	-Inf	CHD2	chr15:93536675:+	chr15_92993449_+
chr15:81029703-81029791:mpeak_29969|chr15_80987651_81046491_ABHD17C_NM_+|	1287.71	-3.55967	1.57274	-2.26336	0.0236134	0.285479	0	0	0	3.17767	4.92557	1974.1	2380.67	2473.51	3435.06	2605.63	0	0.0951732	-Inf	-0.382311	-Inf	ABHD17C	chr15:81029749:+	chr15_80737412_+
chr15:75711553-75711603:mpeak_29781|chr15_75664550_75748124_SIN3A_NM_-|	43.4252	-4.17335	1.59484	-2.61679	0.00887617	0.206155	0	0	1.13987	2.11845	6.15696	89.8833	81.5671	71.8117	83.6787	97.8957	0	3.71578	-Inf	0.0214163	-Inf	SIN3A	chr15:75711551:-	chr15_75419212_-
chr15:50521235-50521299:mpeak_28569|chr15_50474392_50528116_SLC27A2_NM_+|	52.2783	-3.97666	1.67718	-2.37103	0.0177384	0.253162	0	0	1.13987	11.6515	1.84709	94.322	65.2537	113.987	124.988	109.594	0	4.19957	-Inf	-0.542242	-Inf	SLC27A2	chr15:50521301:+	chr15_50229102_+
chr15:41667964-41668033:mpeak_28136|chr15_41624891_41672290_NUSAP1_NM_+|	73.2169	-3.10947	1.54711	-2.00986	0.0444465	0.369011	1.10967	0	2.27974	7.41457	9.85114	96.5413	125.07	143.623	172.653	173.626	0.500729	3.98965	-3.55367	-0.559506	-2.99416	NUSAP1	chr15:41668027:+	chr15_41375828_+
chr15:41642834-41642884:mpeak_28135|chr15_41624891_41672290_NUSAP1_NM_+|	72.3037	-3.75225	1.55557	-2.41215	0.0158588	0.244179	0	0	3.4196	3.17767	4.92557	96.5413	125.07	143.623	172.653	173.626	0	2.35207	-Inf	-0.559506	-Inf	NUSAP1	chr15:41642887:+	chr15_41350686_+
chr15:101171014-101171114:mpeak_30549|chr15_101142754_101188527_ASB7_NM_+|	49.8837	-4.57674	1.5647	-2.92499	0.00344469	0.18265	0	0	6.83921	2.11845	4.30987	100.98	105.493	87.7699	80.501	110.825	0	4.75375	-Inf	0.150156	-Inf	ASB7	chr15:101171089:+	-
chr14:97030671-97030732:mpeak_27243|chr14_96968712_97031291_PAPOLA_NM_+|	430.454	-1.91472	0.688939	-2.77924	0.00544869	0.197157	8.87736	7.61293	11.3987	23.3029	30.1691	1145.18	893.975	984.846	565.626	633.551	0.808683	2.97024	-1.39099	0.485946	-1.87693	PAPOLA	chr14:97030724:+	chr14_96564388_+
chr14:88432118-88432207:mpeak_26836|chr14_88401222_88460009_GALC_NM_-|	63.7894	-2.62761	1.24712	-2.10695	0.0351219	0.335549	1.10967	1.08756	3.4196	6.35534	4.92557	90.993	206.637	88.9097	114.396	120.061	0.738244	4.54608	-2.15715	0.465309	-2.62246	GALC	chr14:88432117:-	chr14_87965774_-
chr14:73836428-73836484:mpeak_26386|chr14_73744001_73925286_NUMB_NM_-|	79.7094	-3.7557	1.5916	-2.35969	0.0182901	0.256657	0	0	2.27974	0	6.15696	138.709	140.295	158.442	199.134	152.077	0	1.65538	-Inf	-0.284265	-Inf	NUMB	chr14:73836427:-	chr14_73369720_-
chr14:70235920-70236233:mpeak_26212|chr14_70233828_70237910_SRSF5_NM_+|	815.302	-1.19755	0.494423	-2.42212	0.0154303	0.240148	16.6451	25.0139	36.4758	42.369	33.8633	2231.55	1450.81	1277.79	1704.29	1334.21	1.13131	2.61122	-0.850929	0.355796	-1.20673	SRSF5	chr14:70236069:+;chr14:70236122:+;chr14:70236157:+;chr14:70236226:+	chr14_69769355_+;chr14_69769404_+;chr14_69769508_+
chr14:54878609-54878668:mpeak_25464|chr14_54863672_54886709_CDKN3_NM_+|	108.397	-3.21301	1.55976	-2.05994	0.0394046	0.351798	0	0	3.4196	2.11845	4.92557	113.186	156.609	276.988	285.99	240.737	0	1.30191	-Inf	-0.989858	-Inf	CDKN3	chr14:54878658:+	chr14_54411952_+
chr14:104153038-104153099:mpeak_27567|chr14_104095524_104167537_KLC1_NM_+|	91.4638	-4.32636	1.61575	-2.67762	0.00741475	0.203115	0	0	0	6.35534	4.92557	147.586	218.6	131.085	221.378	184.709	0	2.10006	-Inf	0.0321561	-Inf	KLC1	chr14:104153070:+;chr14:104153098:+	chr14_103686760_+
chr13:98653535-98653592:mpeak_23950|chr13_98605928_98673989_IPO5_NM_+|	93.3686	-4.20697	1.68106	-2.50257	0.0123296	0.220573	0	0	3.4196	9.53301	0	184.205	176.185	175.54	197.016	187.787	0	2.31155	-Inf	-0.0517873	-Inf	IPO5	chr13:98653595:+	chr13_98001336_+
chr13:53204869-53204988:mpeak_23594|chr13_53191604_53216540_HNRNPA1L2_NM_+mpeak_23594|chr13_53191604_53216540_HNRNPA1L2_NM_+||	121.131	-3.44579	1.65449	-2.08269	0.0372794	0.343139	0	0	3.4196	0	5.54127	230.811	139.208	379.576	210.786	241.969	0	1.0766	-Inf	-0.584593	-Inf	HNRNPA1L2	chr13:53204979:+	chr13_52630853_+
chr13:31734858-31734908:mpeak_22831|chr13_31711661_31736525_HSPH1_NM_-|	1653.86	-3.65261	1.69003	-2.16127	0.0306742	0.316676	0	0	0	0	8.00405	3043.83	2551.42	3757.01	4231.6	2946.72	0	0.0731944	-Inf	-0.381761	-Inf	HSPH1	chr13:31734814:-	-
chr13:30103309-30103367:mpeak_22762|chr13_30088720_30169825_SLC7A1_NM_-|	384.477	-3.64319	1.55163	-2.34797	0.018876	0.25906	1.10967	0	2.27974	6.35534	8.61975	630.293	999.469	672.522	699.088	825.033	0.0680879	0.785509	-3.37383	0.154323	-3.52816	SLC7A1	chr13:30103314:-	chr13_29529166_-
chr13:27648906-27649047:mpeak_22669|chr13_27643521_27746033_USP12_NM_-|	308.799	-5.30073	1.51673	-3.49484	0.000474353	0.0880451	0	0	3.4196	10.5922	4.92557	734.602	687.339	571.074	565.626	510.412	0	1.14973	-Inf	0.372885	-Inf	USP12	chr13:27648908:-;chr13:27648935:-;chr13:27648995:-	chr13_27074772_-;chr13_27074860_-
chr12:76442672-76442742:mpeak_20106|chr12_76442244_76478813_NAP1L1_NM_-|	718.881	-3.30238	1.53726	-2.14823	0.0316955	0.31935	1.10967	0	2.27974	6.35534	6.15696	1218.42	1736.84	1284.63	1572.95	1360.07	0.0375491	0.350717	-3.15166	0.0718041	-3.22346	NAP1L1	chr12:76442666:-	chr12_76048887_-
chr12:56574480-56574540:mpeak_19322|chr12_56557549_56583351_SMARCC2_NM_-|	257.933	-2.40561	0.965535	-2.49148	0.0127212	0.222149	1.10967	2.17512	3.4196	5.29612	11.0825	540.409	595.983	434.29	474.532	511.028	0.289054	1.39439	-2.00654	0.263686	-2.27022	SMARCC2	chr12:56574481:-	chr12_56180696_-
chr12:32902808-32902858:mpeak_18175|chr12_32900297_32908887_YARS2_NM_-|	32.323	-3.55914	1.66095	-2.14283	0.0321267	0.321595	0	0	0	1.05922	5.54127	62.1415	55.4656	54.7137	66.7311	77.5777	0	3.31645	-Inf	-0.173993	-Inf	YARS2	chr12:32902803:-	chr12_32749870_-
chr12:19461565-19461624:mpeak_17767|chr12_19282625_19528464_PLEKHA5_NM_+|	104.344	-2.29806	1.07993	-2.12796	0.0333402	0.326954	0	3.26268	11.3987	8.47379	1.84709	217.495	239.263	159.582	219.259	182.862	0.714312	3.86674	-2.1499	0.286588	-2.43649	PLEKHA5	chr12:19461617:+	chr12_19308682_+
chr12:133131029-133131084:mpeak_22198|chr12_133067156_133159556_FBRSL1_NM_+|	117.164	-1.59691	0.697803	-2.28848	0.0221097	0.278329	3.32901	5.43781	9.11895	5.29612	11.6982	272.979	288.204	215.435	163.12	197.023	1.5622	4.53688	-0.989697	0.54842	-1.53812	FBRSL1	chr12:133131082:+	chr12_132554493_+
chr12:13137149-13137200:mpeak_17645|chr12_13128413_13153243_HEBP1_NM_-|	130.582	-4.66107	1.57107	-2.96682	0.003009	0.177718	0	0	1.13987	10.5922	6.77266	224.153	227.3	212.015	340.011	283.836	0	2.21385	-Inf	-0.303725	-Inf	HEBP1	chr12:13137149:-	chr12_12984216_-
chr12:122735362-122735419:mpeak_21777|chr12_122716974_122751068_VPS33A_NM_-|	130.834	-2.53122	0.912922	-2.77266	0.00556007	0.197157	2.21934	2.17512	17.098	5.29612	9.85114	227.482	338.231	201.757	242.562	261.671	0.7768	4.56739	-2.29037	0.265388	-2.55575	VPS33A	chr12:122735367:-	chr12_122250822_-
chr12:110880452-110880513:mpeak_21119|chr12_110873022_110888216_ARPC3_NM_-|	869.755	-3.73808	1.58248	-2.36217	0.0181683	0.255993	0	0	3.4196	5.29612	1.23139	1272.79	1993.5	1651.67	1865.29	1904.35	0	0.183482	-Inf	-0.146026	-Inf	ARPC3	chr12:110880456:-	-
chr11:85428276-85428335:mpeak_15971|chr11_85406383_85522202_SYTL2_NM_-|	527.286	-3.24398	1.59781	-2.03027	0.0423293	0.36249	1.10967	0	1.13987	6.35534	10.4668	1182.91	644.924	1120.49	1304.96	1000.51	0.0607096	0.524292	-3.43179	-0.321412	-3.11037	SYTL2	chr11:85428284:-	-
chr11:76503791-76503847:mpeak_15765|chr11_76493356_76506652_TSKU_NM_+|	302.155	-1.16511	0.568211	-2.05049	0.0403165	0.355186	11.0967	22.8388	15.9582	14.8291	9.23544	1182.91	772.168	332.842	324.122	335.554	1.73576	4.03244	0.346937	1.56302	-1.21608	TSKU	chr11:76503845:+	chr11_76792798_+
chr11:69482360-69482450:mpeak_15382|chr11_69482355_69490165_ORAOV1_NM_-|	149.962	-2.03159	0.944365	-2.15128	0.0314544	0.318402	1.10967	4.35024	9.11895	11.6515	16.0081	201.96	342.582	180.099	416.275	316.468	1.00266	4.02901	-2.16695	-0.16036	-2.00659	ORAOV1	chr11:69482377:-	chr11_69667607_-
chr11:67441178-67441231:mpeak_15228|chr11_67430870_67448685_ALDH3B2_NM_-|	66.0303	-3.42008	1.59639	-2.14239	0.032162	0.321625	1.10967	0	2.27974	7.41457	3.69418	163.122	141.383	76.3712	150.41	114.52	0.364418	3.92278	-3.00783	0.420384	-3.42821	ALDH3B2	chr11:67441180:-	-
chr11:62591388-62591438:mpeak_14710|chr11_62575138_62599563_STX5_NM_-|	45.7755	-4.25115	1.59995	-2.65706	0.00788257	0.203115	0	0	3.4196	2.11845	3.69418	113.186	87.0049	94.6091	92.1525	61.5696	0	3.71771	-Inf	0.274076	-Inf	STX5	chr11:62591393:-	chr11_62823921_-
chr11:47244650-47244723:mpeak_14234|chr11_47236492_47260350_DDB2_NM_+|	141.728	-1.69127	0.803924	-2.10377	0.0353982	0.335549	4.43868	2.17512	6.83921	14.8291	5.54127	277.418	343.669	257.61	292.346	212.415	1.06488	3.56908	-1.4556	0.289264	-1.74487	DDB2	chr11:47244704:+	chr11_47223170_+
chr11:31525829-31525890:mpeak_13867|chr11_31454115_31531175_IMMP1L_NM_-|	73.5796	-4.32626	1.57796	-2.74168	0.00611256	0.200035	0	0	3.4196	3.17767	11.0825	87.664	122.894	167.561	162.061	177.936	0	3.48331	-Inf	-0.68439	-Inf	IMMP1L	chr11:31525828:-	chr11_31504279_-
chr11:18370015-18370169:mpeak_13684|chr11_18343815_18387329_GTF2H1_NM_+|	94.9265	-1.59202	0.7755	-2.05289	0.0400828	0.353897	3.32901	3.26268	11.3987	5.29612	7.38836	204.179	214.25	198.337	162.061	139.763	1.57534	4.81508	-1.28434	0.327551	-1.61189	GTF2H1	chr11:18370074:+;chr11:18370170:+	chr11_18348526_+;chr11_18348622_+
chr11:118245191-118245241:mpeak_16624|chr11_118230295_118267028_UBE4A_NM_+|	144.837	-3.72118	1.59203	-2.33738	0.0194196	0.261236	0	0	0	6.35534	2.46279	243.018	302.342	314.604	237.266	342.327	0	0.986151	-Inf	-0.128422	-Inf	UBE4A	chr11:118245242:+	chr11_118374526_+
chr10:81942032-81942087:mpeak_11223|chr10_81915668_81965433_ANXA11_NM_-|	130.653	-4.30872	1.56305	-2.75661	0.00584044	0.19874	0	0	6.83921	3.17767	1.84709	300.721	253.402	208.596	269.043	262.902	0	1.60207	-Inf	0.166587	-Inf	ANXA11	chr10:81942037:-	-
chr10:79752836-79752896:mpeak_11154|chr10_79737384_79789298_POLR3A_NM_-|	102.385	-4.1953	1.58155	-2.65265	0.00798621	0.203115	0	0	5.69934	0	4.92557	224.153	180.535	177.819	247.858	182.862	0	1.74597	-Inf	-0.00357664	-Inf	POLR3A	chr10:79752838:-	chr10_77993082_-
chr10:75862316-75862366:mpeak_11049|chr10_75757871_75877780_VCL_NM_+|	52.2037	-3.45604	1.59218	-2.17064	0.0299582	0.314154	0	0	3.4196	3.17767	3.07848	75.4576	85.9173	134.504	130.285	86.1975	0	2.75673	-Inf	-0.536037	-Inf	VCL	chr10:75862369:+	-
chr10:63662674-63662733:mpeak_10554|chr10_63661012_63850620_ARID5B_NM_+|	94.94	-4.96191	1.53485	-3.23282	0.00122574	0.125944	0	0	6.83921	6.35534	6.77266	208.618	150.083	215.435	185.364	169.932	0	3.49853	-Inf	-0.0850659	-Inf	ARID5B	chr10:63662725:+	chr10_61902985_+
chr10:28828840-28828899:mpeak_9843|chr10_28821516_28908465_WAC_NM_+|	612.825	-1.7971	0.665178	-2.70168	0.00689895	0.203115	3.32901	4.35024	7.97908	10.5922	14.161	1298.31	1369.24	1078.32	1205.4	1136.58	0.287876	0.957005	-1.50672	0.226362	-1.73308	WAC	chr10:28828893:+	chr10_28539962_+
chr10:1142515-1142570:mpeak_9021|chr10_1102775_1175152_WDR37_NM_+|	51.2846	-3.50483	1.63874	-2.13873	0.0324574	0.324004	0	0	9.11895	0	2.46279	63.2512	85.9173	118.546	131.344	102.206	0	3.28937	-Inf	-0.654062	-Inf	WDR37	chr10:1142572:+	chr10_1096632_+
chr1:87570048-87570098:mpeak_3212|chr1_87380334_87570152_HS2ST1_NM_+|	99.4724	-3.63204	1.78497	-2.03479	0.0418716	0.360363	0	0	1.13987	9.53301	0	156.464	177.272	189.218	182.187	278.91	0	1.64119	-Inf	-0.377469	-Inf	HS2ST1	chr1:87570098:+	chr1_87104415_+
chr1:8031267-8031320:mpeak_352|chr1_8021713_8044953_PARK7_NM_+|	558.119	-1.21136	0.561295	-2.15815	0.0309159	0.317145	3.32901	14.1383	14.8183	26.4806	22.1651	963.194	1173.48	1089.71	1200.1	1073.77	0.8175	1.88679	-1.27632	-0.0696733	-1.20664	PARK7	chr1:8031320:+	chr1_7971258_+
chr1:46762417-46762467:mpeak_2357|chr1_46744756_46769038_LRRC41_NM_-|	70.2147	-4.21695	1.60206	-2.63221	0.00848322	0.203161	0	0	1.13987	2.11845	4.92557	118.735	192.498	113.987	134.521	134.222	0	2.13829	-Inf	0.286631	-Inf	LRRC41	chr1:46762414:-	chr1_46296745_-
chr1:200709615-200709671:mpeak_7324|chr1_200708685_200826881_CAMSAP2_NM_+|	90.5367	-2.12532	0.976285	-2.17694	0.0294849	0.311002	1.10967	2.17512	3.4196	4.2369	8.61975	199.741	195.761	160.721	176.89	152.693	0.830538	3.31962	-1.72393	0.274968	-1.9989	CAMSAP2	chr1:200709669:+	-
chr1:192995922-192995974:mpeak_7168|chr1_192989586_193029237_UCHL5_NR_-mpeak_7168|chr1_192985525_193028523_UCHL5_NM_-||	140.319	-3.60348	1.59675	-2.25676	0.0240232	0.287345	0	0	1.13987	0	6.15696	276.308	214.25	291.806	331.537	281.989	0	0.805984	-Inf	-0.299063	-Inf	UCHL5	chr1:192995919:-	chr1_193026792_-
chr1:183517102-183517173:mpeak_6992|chr1_183441505_183520952_SMG7_NM_+|	284.939	-4.31989	1.5513	-2.78468	0.00535799	0.197157	0	0	0	8.47379	3.07848	554.835	622.085	584.752	576.218	499.945	0	0.695536	-Inf	0.0880002	-Inf	SMG7	chr1:183517168:+	-
chr1:155437556-155437639:mpeak_5847|chr1_155307542_155532324_ASH1L_NM_-|	202.539	-4.45533	1.55314	-2.86859	0.0041231	0.184529	0	0	6.83921	3.17767	4.30987	318.475	461.126	376.157	378.143	477.165	0	1.16339	-Inf	-0.0746036	-Inf	ASH1L	chr1:155437554:-	chr1_155467767_-;chr1_155467805_-
chr1:109909137-109909192:mpeak_3894|chr1_109856679_109940563_SORT1_NM_-|	213.194	-3.89796	1.57242	-2.47895	0.0131769	0.226587	0	0	2.27974	7.41457	0.615696	418.346	432.849	469.626	387.676	413.132	0	0.811534	-Inf	0.0072029	-Inf	SORT1	chr1:109909150:-	-
chrX:123191706-123191817:mpeak_88346|chrX_123094409_123234423_STAG2_NM_+|	171.255	-3.72759	1.59008	-2.34428	0.0190638	0.260313	0	0	2.27974	2.11845	4.30987	241.908	377.384	294.086	371.788	418.673	0	0.802921	-Inf	-0.223439	-Inf	STAG2	-	chrX_124057891_+
chr9:94838835-94838950:mpeak_84288|chr9_94794840_94877756_SPTLC1_NM_-|	717.087	-3.99697	1.58243	-2.52585	0.0115419	0.220256	0	0	1.13987	2.11845	6.77266	1046.42	1512.8	1252.72	1680.99	1667.92	0	0.217988	-Inf	-0.261479	-Inf	SPTLC1	-	chr9_92076597_-
chr9:139758279-139758330:mpeak_86304|chr9_139756948_139760788_EDF1_NM_-|	380.178	-1.0535	0.491373	-2.14399	0.0320336	0.321249	11.0967	10.8756	20.5176	16.9476	19.0866	721.286	940.74	649.725	713.917	697.584	1.32202	2.7436	-0.778923	0.274403	-1.05333	EDF1	-	chr9_136863867_-
chr8:98731291-98731422:mpeak_81386|chr8_98656406_98736827_MTDH_NM_+|	732.064	-3.22576	1.53896	-2.09607	0.036076	0.337658	0	0	4.55947	1.05922	4.30987	1049.75	902.676	1665.35	1814.45	1878.49	0	0.185294	-Inf	-0.871543	-Inf	MTDH	-	chr8_97719055_+;chr8_97719121_+;chr8_97719177_+
chr8:30250490-30250626:mpeak_79911|chr8_30242016_30428153_RBPMS_NM_+|	42.26	-4.21517	1.56775	-2.68868	0.0071735	0.203115	0	0	6.83921	1.05922	3.69418	81.0059	82.6546	83.2104	77.3233	86.8132	0	4.68678	-Inf	-0.0108664	-Inf	RBPMS	-	chr8_30393012_+;chr8_30393068_+
chr8:104338592-104338756:mpeak_81748|chr8_104310660_104343568_FZD6_NM_+|	62.4214	-2.42311	1.21057	-2.00163	0.0453241	0.371431	0	2.17512	9.11895	4.2369	3.69418	100.98	154.434	93.4692	117.574	138.532	0.851608	4.87736	-2.38564	0.132197	-2.51784	FZD6	-	chr8_103326525_+
chr7:91863088-91863138:mpeak_77217|chr7_91830118_91875414_KRIT1_NM_-|	201.58	-4.16394	1.57439	-2.6448	0.00817398	0.203115	0	0	1.13987	8.47379	3.07848	325.133	415.448	344.24	502.072	416.211	0	1.0053	-Inf	-0.184616	-Inf	KRIT1	-	chr7_92233774_-
chr7:80408144-80408291:mpeak_77051|chr7_80374623_80548667_SEMA3C_NM_-|	473.546	-4.12503	1.67082	-2.46887	0.0135541	0.226979	0	0	2.27974	0	11.6982	734.602	712.352	1065.78	1066.64	1142.12	0	0.426869	-Inf	-0.593307	-Inf	SEMA3C	-	chr7_80778810_-
chr7:143591406-143591509:mpeak_78801|chr7_143551235_143599278_TCAF1_NM_-|	227.323	-4.1806	1.5827	-2.64144	0.0082555	0.203115	0	0	0	1.05922	6.77266	449.417	515.504	434.29	470.295	395.893	0	0.602231	-Inf	0.154403	-Inf	TCAF1	-	chr7_143894321_-
chr6:7570748-7570799:mpeak_70520|chr6_7541869_7582874_DSP_NM_+|	1282.76	-3.5706	1.56208	-2.2858	0.0222657	0.278472	1.10967	0	2.27974	2.11845	8.61975	2443.49	3550.89	2133.83	2149.17	2536.05	0.0185118	0.190905	-2.96733	0.399002	-3.36634	DSP	-	chr6_7570563_+
chr6:33677869-33677934:mpeak_71751|chr6_33665527_33679528_UQCC2_NM_-|	124.039	-1.80515	0.908476	-1.98701	0.046921	0.378769	2.21934	2.17512	3.4196	8.47379	11.6982	257.444	202.286	242.792	298.701	211.184	0.955879	3.13436	-1.83955	-0.126282	-1.71327	UQCC2	-	chr6_33710106_-
chr6:16146040-16146164:mpeak_70731|chr6_16129316_16146892_MYLIP_NM_+|	153.08	-4.0168	1.5893	-2.5274	0.0114911	0.220256	0	0	5.69934	0	3.69418	266.321	353.457	240.512	356.958	304.154	0	1.04184	-Inf	0.0441877	-Inf	MYLIP	-	chr6_16145873_+
chr6:152200133-152200204:mpeak_74521|chr6_152011630_152419866_ESR1_NM_+|	1233.79	-1.87452	0.625466	-2.99699	0.00272657	0.172375	24.4127	3.26268	20.5176	23.3029	27.0906	3779.54	3386.67	1805.55	1639.68	1627.9	0.386194	1.39778	-0.772445	1.08329	-1.85574	ESR1	-	chr6_151879063_+
chr5:177633300-177633365:mpeak_70072|chr5_177631507_177637553_HNRNPAB_NM_+mpeak_70072|chr5_177631507_177637553_HNRNPAB_NM_+||	342.519	-4.22284	1.54427	-2.73453	0.00624695	0.200035	0	0	6.83921	1.05922	6.15696	504.9	656.887	720.397	847.379	681.576	0	0.624864	-Inf	-0.368201	-Inf	HNRNPAB	-	chr5_178206366_+
chr5:153776845-153776895:mpeak_69467|chr5_153570294_153796373_GALNT10_NM_+|	141.109	-3.75312	1.55272	-2.41713	0.0156433	0.242416	0	0	0	4.2369	4.30987	258.553	254.489	273.568	316.708	299.228	0	0.960846	-Inf	-0.208961	-Inf	GALNT10	-	chr5_154397335_+
chr5:10385390-10385537:mpeak_65846|chr5_10353750_10433705_MARCH6_NM_+|	696.616	-2.42969	1.16916	-2.07815	0.0376954	0.344748	1.10967	1.08756	0	7.41457	6.15696	1425.93	1697.68	1037.28	1406.65	1382.85	0.0703427	0.354646	-2.04186	0.292044	-2.33391	MARCH6	-	chr5_10385356_+
chr4:17500609-17500849:mpeak_62344|chr4_17488859_17513857_QDPR_NM_-|	267.691	-2.22389	0.908885	-2.44683	0.0144117	0.230879	1.10967	3.26268	12.5386	9.53301	4.30987	609.209	591.633	483.304	581.514	380.5	0.364107	1.8253	-2.00808	0.317622	-2.3257	QDPR	-	chr4_17499071_-
chr4:102263720-102263840:mpeak_63977|chr4_101947218_102268628_PPP3CA_NM_-|	6827.04	-3.39275	1.54377	-2.19771	0.02797	0.305405	0	0	7.97908	0	3.07848	9727.37	9898.98	15192.2	15508.1	17932.8	0	0.0227367	-Inf	-0.724182	-Inf	PPP3CA	-	chr4_101342564_-
chr3:155649844-155649966:mpeak_60382|chr3_155588324_155655379_GMPS_NM_+|	134.95	-2.54922	1.08204	-2.35594	0.0184761	0.25696	1.10967	2.17512	6.83921	3.17767	17.8552	211.947	304.517	255.33	270.102	276.448	0.636016	3.47584	-2.49998	-0.049756	-2.45023	GMPS	-	chr3_155932177_+
chr2:96932347-96932455:mpeak_47358|chr2_96931883_96936848_CIAO1_NM_+|	325.936	-3.16885	1.11329	-2.84637	0.00442201	0.191049	0	2.17512	6.83921	10.5922	12.3139	689.105	570.97	667.963	725.568	573.829	0.172618	1.51194	-3.18853	-0.0577891	-3.13075	CIAO1	-	chr2_96266717_+
chr2:85779963-85780013:mpeak_47095|chr2_85777249_85788657_GGCX_NM_-|	67.8276	-3.95829	1.69724	-2.3322	0.0196904	0.263106	0	0	0	0	6.77266	159.793	125.07	112.847	145.114	128.681	0	1.75167	-Inf	0.144231	-Inf	GGCX	-	chr2_85552840_-
chr2:55234392-55234443:mpeak_46175|chr2_55200334_55277734_RTN4_NM_-|	1259.38	-4.33533	1.56225	-2.77507	0.00551907	0.197157	0	0	4.55947	1.05922	3.07848	2615.49	3475.85	1954.87	2189.42	2349.5	0	0.133931	-Inf	0.492662	-Inf	RTN4	-	chr2_55007245_-
chr2:47604146-47604227:mpeak_46044|chr2_47596286_47613710_EPCAM_NM_+|	955.605	-4.47262	1.53923	-2.90576	0.00366367	0.18265	0	0	0	3.17767	6.15696	2024.04	2255.6	1744	1685.23	1837.85	0	0.177226	-Inf	0.28545	-Inf	EPCAM	-	chr2_47377054_+
chr2:15769722-15769785:mpeak_44984|chr2_15731744_15770899_DDX1_NM_+|	59.797	-4.07834	1.62522	-2.50941	0.0120934	0.220256	0	0	6.83921	0	4.92557	78.7866	133.77	102.588	142.995	128.065	0	3.14862	-Inf	-0.228871	-Inf	DDX1	-	chr2_15629630_+;chr2_15629655_+
chr17:72818179-72818229:mpeak_38556|chr17_72772621_72832065_TMEM104_NM_+|	43.4048	-4.30779	1.61565	-2.66629	0.00766927	0.203115	0	0	1.13987	4.2369	3.69418	90.993	103.318	72.9516	101.685	56.0284	0	3.93251	-Inf	0.33753	-Inf	TMEM104	-	chr17_74822096_+
chr17:44241166-44241233:mpeak_36919|chr17_44109069_44302740_KANSL1_NM_-|	43.4213	-4.21592	1.66112	-2.53801	0.0111486	0.219841	0	0	1.13987	0	6.77266	93.2123	94.6178	64.9725	87.9156	85.5818	0	3.31804	-Inf	0.240584	-Inf	KANSL1	-	chr17_46163811_-
chr17:35368836-35368889:mpeak_36211|chr17_35306174_35413900_AATF_NM_+|	90.8671	-3.33701	1.65776	-2.01296	0.0441183	0.368415	0	1.08756	3.4196	0	10.4668	188.644	182.71	183.519	203.371	135.453	0.292864	2.65849	-3.08955	0.0927612	-3.18231	AATF	-	chr17_37011584_+
chr16:4890463-4890652:mpeak_31202|chr16_4855311_4897303_GLYR1_NM_-|	132.081	-1.83836	0.758638	-2.42324	0.0153829	0.239756	2.21934	4.35024	10.2588	6.35534	15.3924	298.501	229.475	249.631	255.273	249.357	1.24429	4.24343	-1.69953	0.0703728	-1.7699	GLYR1	-	chr16_4840463_-
chr16:48412666-48412716:mpeak_32681|chr16_48396341_48419229_SIAH1_NM_-|	40.7383	-4.62763	1.75778	-2.63265	0.00847211	0.203161	0	0	1.13987	0	6.15696	72.1286	143.558	43.315	75.2049	65.8795	0	3.95708	-Inf	0.811065	-Inf	SIAH1	-	chr16_48378723_-
chr16:30781881-30781939:mpeak_32416|chr16_30772932_30785258_RNF40_NM_+|	126.207	-4.20346	1.56538	-2.68526	0.00724736	0.203115	0	0	0	3.17767	5.54127	265.211	265.365	218.855	278.576	225.345	0	1.20631	-Inf	0.138975	-Inf	RNF40	-	chr16_30770620_+
chr15:91526915-91526970:mpeak_30365|chr15_91510432_91537881_PRC1_NM_-|	158.322	-3.20735	1.58946	-2.01789	0.0436028	0.367207	0	0	2.27974	1.05922	6.15696	156.464	246.876	341.96	410.979	417.442	0	0.811353	-Inf	-0.951948	-Inf	PRC1	-	chr15_90983628_-
chr15:77524779-77524829:mpeak_29844|chr15_77407661_77712446_PEAK1_NM_-|	25.7543	-3.85159	1.77321	-2.17211	0.0298476	0.313603	0	0	0	0	6.15696	56.5932	52.2029	53.5738	50.8427	38.1732	0	4.31796	-Inf	0.19472	-Inf	PEAK1	-	chr15_77232444_-
chr14:97021185-97021341:mpeak_27237|chr14_96968712_97031291_PAPOLA_NM_+|	426.226	-1.93018	0.764693	-2.52413	0.0115986	0.220256	3.32901	4.35024	11.3987	9.53301	10.4668	1145.18	893.975	984.846	565.626	633.551	0.37659	1.43765	-1.4467	0.485946	-1.93264	PAPOLA	-	chr14_96554999_+
chr14:96981773-96981826:mpeak_27226|chr14_96968712_97031291_PAPOLA_NM_+|	423.967	-3.81438	1.59105	-2.3974	0.0165119	0.247105	1.10967	0	5.69934	1.05922	8.61975	1145.18	893.975	984.846	565.626	633.551	0.0544181	0.704128	-3.20773	0.485946	-3.69368	PAPOLA	-	chr14_96515486_+
chr14:57069279-57069337:mpeak_25609|chr14_57046510_57113960_TMEM260_NM_+|	82.8018	-4.34345	1.71062	-2.5391	0.0111137	0.219841	0	0	0	0	7.38836	180.876	206.637	120.826	162.061	150.23	0	1.70586	-Inf	0.424449	-Inf	TMEM260	-	chr14_56602651_+
chr12:69986222-69986378:mpeak_19947|chr12_69979207_69995074_CCT2_NM_+|	391.351	-1.64703	0.755278	-2.1807	0.0292059	0.310604	3.32901	3.26268	10.2588	7.41457	16.6238	641.389	767.818	744.334	961.775	757.306	0.467759	1.39226	-1.79441	-0.220813	-1.57359	CCT2	-	chr12_69592483_+
chr12:62950125-62950230:mpeak_19610|chr12_62860596_62986365_MON2_NM_+|	133.225	-3.58694	1.52254	-2.35589	0.0184786	0.25696	0	1.08756	6.83921	2.11845	7.38836	301.83	269.715	232.533	266.924	243.816	0.190284	2.19919	-3.32481	0.205938	-3.53075	MON2	-	chr12_62556449_+
chr12:19337666-19337758:mpeak_17761|chr12_19282625_19528464_PLEKHA5_NM_+|	102.79	-4.26676	1.5752	-2.70871	0.00675459	0.203115	0	0	0	6.35534	3.07848	217.495	239.263	159.582	219.259	182.862	0	1.6795	-Inf	0.286588	-Inf	PLEKHA5	-	chr12_19184791_+
chr11:89940457-89940529:mpeak_16078|chr11_89935719_89956532_CHORDC1_NM_-|	76.7169	-3.5575	1.6035	-2.21858	0.0265151	0.299571	0	0	2.27974	1.05922	4.30987	153.135	119.632	147.043	205.489	134.222	0	1.5714	-Inf	-0.250566	-Inf	CHORDC1	-	chr11_90207291_-
chr11:74505592-74505742:mpeak_15674|chr11_74459912_74546590_RNF169_NM_+|	117.553	-5.3401	1.75932	-3.03531	0.00240288	0.161202	0	0	9.11895	10.5922	0	241.908	302.342	229.114	181.127	201.333	0	3.22303	-Inf	0.416706	-Inf	RNF169	-	chr11_74794598_+
chr11:63964732-63964826:mpeak_14806|chr11_63952743_63971525_STIP1_NM_+|	1799.77	-2.66946	1.22413	-2.18069	0.0292064	0.310604	1.10967	1.08756	12.5386	4.2369	3.69418	4886.99	2673.23	3494.84	4082.25	2837.74	0.0290631	0.196543	-2.63476	0.122822	-2.75759	STIP1	-	chr11_64197294_+;chr11_64197333_+
chr11:118130323-118130415:mpeak_16619|chr11_118125948_118135251_MPZL2_NM_-|	412.377	-4.15077	1.62801	-2.54959	0.0107848	0.215884	0	0	11.3987	1.05922	4.30987	470.5	793.92	689.62	1034.86	1118.1	0	0.589878	-Inf	-0.583766	-Inf	MPZL2	-	chr11_118259608_-
chr10:32321662-32321711:mpeak_9959|chr10_32300444_32345371_KIF5B_NM_-|	431.564	-3.91843	1.58158	-2.47754	0.0132292	0.226587	0	0	7.97908	2.11845	1.84709	654.706	900.501	756.873	1072.99	918.619	0	0.434589	-Inf	-0.236568	-Inf	KIF5B	-	chr10_32032718_-
chr10:134405483-134405537:mpeak_12993|chr10_134351352_134595540_INPP5A_NM_+|	290.924	-2.05174	0.972395	-2.10998	0.0348599	0.334984	3.32901	2.17512	1.13987	0	9.23544	914.368	948.353	323.723	351.662	355.257	0.295489	1.00668	-0.329605	1.43883	-1.76844	INPP5A	-	chr10_132592065_+
chr10:102113534-102113584:mpeak_11927|chr10_102106771_102120490_SCD_NM_+|	9855.18	-3.85691	1.60562	-2.40214	0.0162996	0.247105	0	0	3.4196	1.05922	3.69418	14674.3	25307.5	15390.5	20417.6	22753.7	0	0.0139562	-Inf	0.0343477	-Inf	SCD	-	chr10_100353872_+
chr1:78168836-78168887:mpeak_3031|chr1_78163159_78225564_USP33_NM_-|	102.587	-4.41886	1.56291	-2.82733	0.00469383	0.194494	0	0	4.55947	7.41457	1.84709	195.302	216.425	178.959	237.266	184.093	0	2.3023	-Inf	0.0409208	-Inf	USP33	-	chr1_77703153_-
chr1:45435543-45435593:mpeak_2259|chr1_45316675_45452394_EIF2B3_NM_-|	28.9466	-4.1946	1.80691	-2.32142	0.020264	0.267242	0	0	0	0	6.15696	54.3739	85.9173	38.7555	59.3165	44.9458	0	4.30503	-Inf	0.557191	-Inf	EIF2B3	-	chr1_44969871_-
chr1:26758998-26759147:mpeak_1242|chr1_26758772_26795382_DHDDS_NM_+|	65.723	-3.75374	1.58481	-2.36858	0.0178566	0.253162	0	0	0	3.17767	4.92557	103.199	137.033	127.665	133.462	147.767	0	1.98174	-Inf	-0.182338	-Inf	DHDDS	-	chr1_26432648_+
chr1:200568550-200568615:mpeak_7314|chr1_200522895_200589862_KIF14_NM_-|	107.575	-3.43991	1.58224	-2.17407	0.0296996	0.312352	0	0	4.55947	9.53301	1.84709	144.257	100.056	295.226	276.457	243.816	0	1.95458	-Inf	-1.15399	-Inf	KIF14	-	chr1_200599436_-
chr1:171531917-171532114:mpeak_6542|chr1_171454665_171560725_PRRC2C_NM_+|	152.997	-4.68566	1.55179	-3.01952	0.00253174	0.166046	0	0	4.55947	0	6.15696	321.804	387.172	255.33	282.813	272.138	0	1.32256	-Inf	0.392277	-Inf	PRRC2C	-	chr1_171562974_+
chr9:116085722-116085776:mpeak_85128|chr9_116079189_116102620_WDR31_NM_-|	29.8258	-3.79054	1.72087	-2.20269	0.0276167	0.303755	0	0	0	5.29612	3.69418	48.8255	59.8159	30.7764	66.7311	83.119	0	4.97728	-Inf	-0.148474	-Inf	WDR31	-	-
chr3:126529830-126529925:mpeak_59396|chr3_126423062_126679038_CHCHD6_NM_+|	29.3194	-4.18499	1.71702	-2.43735	0.0147954	0.233632	0	0	1.13987	0	6.77266	65.4706	59.8159	47.8745	67.7903	44.3301	0	4.94549	-Inf	0.232166	-Inf	CHCHD6	-	-
chr20:40142495-40142546:mpeak_52393|chr20_40034129_40247133_CHD6_NM_-|	31.16	-4.05143	1.6411	-2.46872	0.0135597	0.226979	0	0	4.55947	0	3.69418	55.4835	77.2168	66.1124	61.435	43.0987	0	4.83671	-Inf	0.222127	-Inf	CHD6	-	-
chr20:62888819-62888869:mpeak_53633|chr20_62887047_62904573_PCMTD2_NM_+|	28.0869	-3.49605	1.60477	-2.17853	0.0293664	0.310604	0	0	3.4196	2.11845	3.07848	46.6062	46.7651	71.8117	57.1981	49.8714	0	4.8169	-Inf	-0.352988	-Inf	PCMTD2	-	-
chr4:15687224-15687282:mpeak_62313|chr4_15683351_15687858_FAM200B_NM_+|	32.9531	-4.22751	1.68713	-2.50574	0.0122194	0.220338	0	0	0	2.11845	6.77266	55.4835	80.4795	49.0143	59.3165	76.3463	0	4.8144	-Inf	0.143171	-Inf	FAM200B	-	-
chr12:123375199-123375250:mpeak_21866|chr12_123352154_123380712_VPS37B_NM_-|	40.8551	-3.98486	1.61942	-2.46067	0.0138677	0.227581	0	0	3.4196	7.41457	1.23139	57.7029	88.0924	90.0496	83.6787	76.962	0	4.81294	-Inf	-0.196999	-Inf	VPS37B	-	-
chr5:56224735-56224787:mpeak_66609|chr5_56219412_56247957_MIER3_NM_-|	22.707	-3.30748	1.68129	-1.96722	0.0491577	0.388398	0	0	0	2.11845	4.92557	28.8514	43.5024	38.7555	57.1981	51.7185	0	4.77004	-Inf	-0.444293	-Inf	MIER3	-	-
chr7:132656517-132656575:mpeak_78437|chr7_132470421_132766828_CHCHD3_NM_-|	45.4385	-4.29414	1.89111	-2.2707	0.0231654	0.283532	0	0	10.2588	2.11845	0	57.7029	123.982	77.511	110.159	72.6522	0	4.75459	-Inf	0.0661005	-Inf	CHCHD3	-	-
chr21:47968475-47968580:mpeak_54633|chr21_47878861_47987282_DIP2A_NM_+|	38.6116	-4.03304	1.88636	-2.138	0.0325165	0.324138	0	0	1.13987	9.53301	0	51.0448	98.9681	79.7908	69.9088	75.7306	0	4.73445	-Inf	-0.00263174	-Inf	DIP2A	-	-
chr2:170800071-170800205:mpeak_49149|chr2_170684017_170938235_UBR3_NM_+|	79.2229	-1.92273	0.907559	-2.11857	0.0341267	0.330345	0	4.35024	5.69934	8.47379	4.30987	175.328	196.849	156.162	115.455	125.602	1.16887	4.6531	-1.50207	0.491013	-1.99308	UBR3	-	-
chr3:28319346-28319396:mpeak_56919|chr3_28283123_28360999_CMC1_NM_+|	22.1873	-3.54044	1.77605	-1.99343	0.0462142	0.374939	0	0	0	0	6.15696	38.8385	43.5024	41.0353	45.5466	46.7929	0	4.61629	-Inf	-0.110842	-Inf	CMC1	-	-
chr8:123846961-123847011:mpeak_82047|chr8_123793900_123985481_ZHX2_NM_+|	29.3251	-4.39699	1.85705	-2.36773	0.0178975	0.253162	0	0	0	0	6.15696	51.0448	102.231	53.5738	32.8359	47.4086	0	4.60098	-Inf	0.780814	-Inf	ZHX2	-	-
chr7:98645054-98645104:mpeak_77416|chr7_98628306_98741743_SMURF1_NM_-|	32.3777	-4.34166	1.74457	-2.48867	0.0128221	0.223014	0	0	2.27974	0	4.92557	107.638	52.2029	34.196	52.9612	69.5737	0	4.59725	-Inf	0.61331	-Inf	SMURF1	-	-
chr15:50762531-50762637:mpeak_28614|chr15_50716573_50791099_USP8_NM_+|	108.866	-2.54329	0.988444	-2.57302	0.0100814	0.21109	2.21934	1.08756	11.3987	5.29612	12.9296	163.122	244.701	192.638	225.615	229.655	0.810867	4.57233	-2.57827	-0.0828821	-2.49539	USP8	-	-
chr18:55337313-55337369:mpeak_40325|chr18_55315944_55470327_ATP8B1_NM_-|	52.8168	-2.31772	1.17311	-1.97571	0.048188	0.384684	2.21934	0	4.55947	3.17767	4.30987	133.16	110.931	83.2104	86.8564	99.7428	0.909224	4.46501	-1.85551	0.440444	-2.29595	ATP8B1	-	-
chr17:57127179-57127340:mpeak_37552|chr17_57060282_57184266_TRIM37_NM_-|	58.8394	-3.38135	1.61827	-2.08949	0.0366635	0.340324	1.10967	0	5.69934	6.35534	0.615696	115.406	175.097	85.4901	103.804	94.8172	0.381982	4.45965	-2.92829	0.61706	-3.54535	TRIM37	-	-
chr2:61118832-61118971:mpeak_46276|chr2_61108629_61148897_REL_NM_+|	114.994	-4.04306	1.53359	-2.63634	0.00838059	0.203161	0	1.08756	18.2379	5.29612	7.38836	224.153	200.111	219.995	229.852	243.816	0.25634	4.45784	-4.24452	-0.124306	-4.12021	REL	-	-
chr9:134105532-134105584:mpeak_85971|chr9_134000947_134108840_NUP214_NM_+|	66.4443	-4.79674	1.56556	-3.06392	0.00218459	0.158477	0	0	10.2588	1.05922	6.15696	128.722	125.07	113.987	153.587	125.602	0	4.44457	-Inf	-0.0465714	-Inf	NUP214	-	-
chr17:35551727-35551777:mpeak_36221|chr17_35444374_35766902_ACACA_NM_-|	64.5254	-2.11787	1.01717	-2.08212	0.0373312	0.343139	0	3.26268	4.55947	4.2369	4.92557	136.489	182.71	103.728	88.9748	116.367	1.02214	4.43976	-1.48739	0.631491	-2.11888	ACACA	-	-
chr1:91475728-91475778:mpeak_3301|chr1_91382547_91487812_ZNF644_NM_-|	30.0465	-3.86563	1.67565	-2.30694	0.0210581	0.271381	0	0	0	3.17767	4.30987	48.8255	72.8666	37.6157	67.7903	65.8795	0	4.37138	-Inf	0.091795	-Inf	ZNF644	-	-
chr7:44871426-44871476:mpeak_76229|chr7_44869762_44887725_H2AFV_NM_-|	36.8177	-3.57911	1.60378	-2.23167	0.0256366	0.295834	0	0	2.27974	4.2369	4.30987	69.9092	38.0646	80.9306	77.3233	91.123	0	4.34142	-Inf	-0.622684	-Inf	H2AFV	-	-
chr17:65882329-65882444:mpeak_38345|chr17_65821779_65978367_BPTF_NM_+|	70.0857	-2.44228	1.23781	-1.97307	0.0484874	0.38572	2.21934	0	11.3987	2.11845	3.07848	118.735	178.36	113.987	139.818	131.143	0.747014	4.31113	-2.31764	0.211223	-2.52886	BPTF	-	-
chr6:70415944-70416001:mpeak_72603|chr6_70386163_70507049_LMBRD1_NM_-|	81.5657	-2.13654	1.05815	-2.01913	0.0434733	0.36684	1.10967	2.17512	11.3987	3.17767	4.30987	147.586	206.637	110.567	174.772	153.924	0.927324	4.29952	-1.9385	0.274534	-2.21303	LMBRD1	-	-
chr2:133412342-133412392:mpeak_48401|chr2_133403853_133429070_LYPD1_NM_-|	42.7526	-3.56196	1.5983	-2.22859	0.0258413	0.296489	0	0	6.83921	4.2369	1.23139	53.2642	72.8666	90.0496	97.4486	101.59	0	4.25735	-Inf	-0.611626	-Inf	LYPD1	-	-
chr5:16458058-16458167:mpeak_65946|chr5_16451893_16465894_ZNF622_NM_-|	88.9738	-2.13149	1.06246	-2.00619	0.0448358	0.369955	3.32901	0	3.4196	13.7699	4.30987	196.412	158.784	140.204	200.193	169.316	0.937233	4.21794	-2.10617	0.0638893	-2.17006	ZNF622	-	-
chr2:164551646-164551734:mpeak_49030|chr2_164468316_164592513_FIGN_NM_-|	60.9125	-3.62552	1.56765	-2.31271	0.0207388	0.269655	1.10967	0	3.4196	3.17767	5.54127	150.915	155.521	116.267	70.968	102.206	0.362121	4.1938	-2.86643	0.667285	-3.53371	FIGN	-	-
chr6:111692116-111692235:mpeak_73531|chr6_111621359_111804918_REV3L_NM_-|	52.3315	-4.24663	1.55181	-2.73656	0.00620849	0.200035	0	0	3.4196	6.35534	3.69418	102.09	85.9173	96.8888	112.278	112.672	0	4.18505	-Inf	-0.19059	-Inf	REV3L	-	-
chr16:89452052-89452104:mpeak_34235|chr16_89353521_89556969_ANKRD11_NR_-mpeak_34235|chr16_89335071_89556969_ANKRD11_NM_-||	68.2351	-5.0875	1.6147	-3.15075	0.00162853	0.136355	0	0	5.69934	4.2369	3.69418	105.419	234.913	92.3293	119.692	116.367	0	4.1507	-Inf	0.636502	-Inf	ANKRD11	-	-
chr5:38951657-38951709:mpeak_66311|chr5_38942480_39074510_RICTOR_NM_-|	58.3864	-4.57745	1.66745	-2.74518	0.00604775	0.200035	0	0	7.97908	4.2369	0	132.051	140.295	101.448	85.7971	112.057	0	4.08149	-Inf	0.448801	-Inf	RICTOR	-	-
chr4:142962945-142962999:mpeak_64773|chr4_142950067_143767604_INPP4B_NM_-|	67.6643	-4.80632	1.56414	-3.07281	0.00212053	0.155808	0	0	10.2588	1.05922	3.69418	139.818	153.346	129.945	119.692	118.829	0	4.07424	-Inf	0.255139	-Inf	INPP4B	-	-
chr14:34998611-34998718:mpeak_24878|chr14_34985792_35008943_EAPP_NM_-|	62.6735	-4.70165	1.58515	-2.96606	0.00301643	0.177718	0	0	4.55947	3.17767	6.77266	93.2123	156.609	100.308	145.114	116.982	0	4.00376	-Inf	0.0482575	-Inf	EAPP	-	-
chr6:13688698-13688748:mpeak_70689|chr6_13622724_13711796_RANBP9_NM_-|	48.6916	-4.0908	1.72678	-2.36904	0.0178342	0.253162	0	0	7.97908	3.17767	0	86.5543	109.844	69.532	114.396	95.4329	0	3.99367	-Inf	0.0766115	-Inf	RANBP9	-	-
chr21:38883773-38883824:mpeak_54133|chr21_38739858_38884213_DYRK1A_NM_+|	74.2404	-2.06661	1.01194	-2.04222	0.0411293	0.358386	1.10967	2.17512	6.83921	1.05922	8.00405	153.135	171.835	113.987	145.114	139.147	1.0108	3.99311	-1.69042	0.291599	-1.98201	DYRK1A	-	-
chr16:89336176-89336234:mpeak_34206|chr16_89335071_89556969_ANKRD11_NM_-|	68.3936	-2.66274	1.32154	-2.01489	0.0439167	0.367994	2.21934	0	6.83921	0	6.15696	105.419	234.913	92.3293	119.692	116.367	0.652111	3.95756	-1.96492	0.636502	-2.60142	ANKRD11	-	-
chr4:107238900-107238952:mpeak_64158|chr4_107236766_107268682_AIMP1_NM_+|	97.8013	-2.87529	1.28927	-2.23017	0.0257359	0.296031	2.21934	0	13.6784	0	7.38836	184.205	231.651	148.183	194.897	195.791	0.53368	3.90942	-2.6618	0.211105	-2.87291	AIMP1	-	-
chr7:870025-870078:mpeak_75002|chr7_855193_912851_SUN1_NM_+|	86.604	-2.26663	1.15237	-1.96692	0.0491925	0.388398	1.10967	1.08756	12.5386	3.17767	4.92557	145.367	150.083	194.917	185.364	167.469	0.743689	3.76846	-2.64685	-0.305643	-2.3412	SUN1	-	-
chr15:52585909-52585964:mpeak_28826|chr15_52486251_52587995_MYO5C_NM_-|	52.8572	-3.90752	1.63591	-2.38859	0.016913	0.24753	0	0	5.69934	0	7.38836	55.4835	100.056	121.966	115.455	122.524	0	3.63603	-Inf	-0.625536	-Inf	MYO5C	-	-
chr12:112525976-112526031:mpeak_21219|chr12_112467457_112546635_NAA25_NM_-|	92.4528	-2.02537	0.986622	-2.05283	0.0400892	0.353897	3.32901	0	5.69934	7.41457	6.15696	215.276	155.521	191.498	183.246	156.387	0.897798	3.62827	-1.94829	0.066527	-2.01482	NAA25	-	-
chr1:60330856-60330921:mpeak_2693|chr1_60280532_60338466_HOOK1_NM_+|	89.3748	-2.36804	1.15868	-2.04374	0.0409797	0.358386	2.21934	0	7.97908	6.35534	5.54127	139.818	182.71	158.442	168.417	222.266	0.688106	3.61952	-2.57784	-0.182743	-2.3951	HOOK1	-	-
chr3:63886347-63886519:mpeak_58149|chr3_63850232_63985125_ATXN7_NM_+|	136.618	-3.04908	1.12308	-2.71493	0.00662902	0.202849	2.21934	0	6.83921	12.7107	10.4668	244.127	256.664	263.31	240.444	329.398	0.443166	3.6028	-3.1726	-0.149404	-3.0232	ATXN7	-	-
chr7:155457865-155457954:mpeak_79114|chr7_155437202_155567686_RBM33_NM_+|	57.2841	-4.24416	1.60137	-2.65032	0.00804147	0.203115	0	0	2.27974	7.41457	2.46279	113.186	109.844	84.3503	146.173	107.131	0	3.60045	-Inf	-0.0133463	-Inf	RBM33	-	-
chr14:99958285-99958343:mpeak_27287|chr14_99947738_99976493_CCNK_NM_+|	120.528	-1.78528	0.836326	-2.13467	0.0327876	0.325495	2.21934	3.26268	7.97908	5.29612	10.4668	207.508	303.43	186.938	236.207	241.969	1.07293	3.56962	-1.5297	0.204509	-1.73421	CCNK	-	-
chr19:13868246-13868296:mpeak_41670|chr19_13858752_13873403_CCDC130_NM_+|	64.061	-4.08012	1.62307	-2.51383	0.0119429	0.220256	0	0	9.11895	3.17767	2.46279	112.077	95.7054	127.665	190.66	99.7428	0	3.53038	-Inf	-0.423705	-Inf	CCDC130	-	-
chr2:163212953-163213003:mpeak_49013|chr2_163200582_163216726_GCA_NM_+|	40.0744	-4.02463	1.61368	-2.49407	0.0126287	0.222059	0	0	3.4196	0	4.30987	82.1156	89.18	76.3712	86.8564	58.4911	0	3.48616	-Inf	0.21272	-Inf	GCA	-	-
chr1:36030100-36030150:mpeak_1721|chr1_36023392_36030827_NCDN_NM_+|	45.4435	-4.457	1.71075	-2.60529	0.00917955	0.206791	0	0	0	3.17767	4.30987	132.051	98.9681	67.2522	108.041	40.636	0	3.4676	-Inf	0.682416	-Inf	NCDN	-	-
chr9:139304537-139304598:mpeak_86237|chr9_139297339_139305054_SDCCAG3_NM_-|	93.5693	-2.37796	1.16646	-2.03861	0.0414885	0.359212	1.10967	1.08756	10.2588	4.2369	4.92557	143.147	204.461	161.861	200.193	204.411	0.632099	3.4285	-2.55892	-0.119561	-2.43936	SDCCAG3	-	-
chr12:76752476-76752598:mpeak_20139|chr12_76749801_76953589_OSBPL8_NM_-|	112.242	-2.31738	1.01971	-2.2726	0.0230506	0.283388	3.32901	0	5.69934	5.29612	10.4668	239.689	221.862	266.729	155.706	213.647	0.721266	3.37414	-2.10368	0.122241	-2.22592	OSBPL8	-	-
chr3:65567438-65567488:mpeak_58249|chr3_65342807_66024509_MAGI1_NM_-|	34.6599	-3.86386	1.64512	-2.34867	0.0188404	0.259006	0	0	0	1.05922	5.54127	61.0319	81.5671	67.2522	66.7311	63.4167	0	3.34371	-Inf	0.115804	-Inf	MAGI1	-	-
chr10:105163172-105163323:mpeak_12185|chr10_105156411_105205134_PDCD11_NM_+|	48.1063	-4.15367	1.66652	-2.49242	0.0126875	0.222144	0	0	2.27974	0	6.77266	100.98	91.3551	104.868	110.159	64.6481	0	3.23675	-Inf	0.0448322	-Inf	PDCD11	-	-
chr8:17844743-17844795:mpeak_79556|chr8_17780365_17885145_PCM1_NM_+|	46.5888	-3.78137	1.60811	-2.35144	0.0187011	0.2583	0	0	4.55947	1.05922	3.69418	67.6899	101.143	75.2313	101.685	110.825	0	3.23654	-Inf	-0.184216	-Inf	PCM1	-	-
chr17:57107810-57107920:mpeak_37544|chr17_57060282_57184266_TRIM37_NM_-|	58.3505	-4.73166	1.63403	-2.8957	0.00378311	0.183069	0	0	0	2.11845	6.77266	115.406	175.097	85.4901	103.804	94.8172	0	3.12945	-Inf	0.61706	-Inf	TRIM37	-	-
chr19:44079376-44079520:mpeak_43191|chr19_44047657_44079730_XRCC1_NM_-|	42.8977	-3.40664	1.6161	-2.10794	0.0350364	0.335549	0	0	5.69934	0	3.07848	61.0319	77.2168	102.588	104.863	74.4992	0	3.11325	-Inf	-0.443214	-Inf	XRCC1	-	-
chr5:14230513-14230569:mpeak_65894|chr5_14143828_14507988_TRIO_NM_+|	53.4087	-3.83647	1.62699	-2.35802	0.0183728	0.25696	0	0	6.83921	0	3.07848	112.077	83.7422	139.064	100.626	88.6603	0	3.02046	-Inf	-0.160754	-Inf	TRIO	-	-
chr14:89868701-89868751:mpeak_26881|chr14_89629313_90085494_FOXN3_NM_-|	43.0017	-4.35376	1.73422	-2.51051	0.0120558	0.220256	0	0	0	0	6.15696	88.7736	130.507	56.9934	73.0864	74.4992	0	3.00958	-Inf	0.685084	-Inf	FOXN3	-	-
chr3:27441749-27441799:mpeak_56899|chr3_27418336_27525911_SLC4A7_NM_-|	74.9349	-4.43806	1.56781	-2.83073	0.00464417	0.194494	0	0	4.55947	5.29612	1.23139	183.096	164.222	144.763	121.811	124.371	0	2.83595	-Inf	0.414253	-Inf	SLC4A7	-	-
chr1:70736678-70736728:mpeak_2942|chr1_70728530_70820417_ANKRD13C_NM_-|	45.9903	-4.11024	1.88671	-2.17852	0.0293673	0.310604	0	0	0	0	6.77266	137.599	72.8666	119.686	54.0204	68.958	0	2.79096	-Inf	0.379584	-Inf	ANKRD13C	-	-
chr17:47885140-47885190:mpeak_37143|chr17_47865980_47904762_KAT7_NM_+|	63.1778	-3.84623	1.56747	-2.45379	0.0141361	0.229534	0	0	5.69934	3.17767	1.84709	112.077	119.632	141.344	114.396	133.606	0	2.75439	-Inf	-0.16378	-Inf	KAT7	-	-
chr20:49418684-49418743:mpeak_52976|chr20_49411430_49493022_BCAS4_NM_+|	200.123	-1.87537	0.927945	-2.021	0.04328	0.365494	1.10967	5.43781	17.098	2.11845	9.85114	558.164	337.144	313.464	366.491	390.351	0.73131	2.71582	-1.56544	0.327395	-1.89283	BCAS4	-	-
chr12:125608473-125608591:mpeak_22101|chr12_125549924_125626637_AACS_NM_+|	113.428	-2.69242	1.22649	-2.19523	0.0281474	0.305635	1.10967	1.08756	2.27974	3.17767	11.0825	245.237	239.263	200.617	264.806	165.622	0.453504	2.62104	-2.32723	0.203718	-2.53095	AACS	-	-
chr4:170160039-170160089:mpeak_65245|chr4_170017838_170192249_SH3RF1_NM_-|	50.0061	-4.03711	1.72303	-2.34303	0.0191279	0.260859	0	0	0	1.05922	6.15696	67.6899	146.821	87.7699	88.9748	101.59	0	2.59263	-Inf	0.209192	-Inf	SH3RF1	-	-
chr1:109467683-109467814:mpeak_3798|chr1_109419602_109472322_GPSM2_NM_+|	76.489	-3.64688	1.60556	-2.27141	0.023122	0.283532	0	0	9.11895	2.11845	1.84709	95.4317	129.42	148.183	207.608	171.164	0	2.48304	-Inf	-0.643743	-Inf	GPSM2	-	-
chr7:2617870-2617939:mpeak_75141|chr7_2598605_2649677_IQCE_NM_+|	140.193	-1.94796	0.912901	-2.13381	0.032858	0.325894	4.43868	0	4.55947	4.2369	9.23544	277.418	367.596	224.554	226.674	283.22	0.688154	2.45515	-1.43738	0.39763	-1.83501	IQCE	-	-
chr16:89548017-89548067:mpeak_34246|chr16_89353521_89556969_ANKRD11_NR_-mpeak_34246|chr16_89335071_89556969_ANKRD11_NM_-||	67.6724	-4.59222	1.86162	-2.46678	0.0136334	0.226979	0	0	0	0	8.00405	105.419	234.913	92.3293	119.692	116.367	0	2.43737	-Inf	0.636502	-Inf	ANKRD11	-	-
chr9:71827462-71827525:mpeak_83790|chr9_71736179_71869124_TJP2_NM_+|	62.5048	-3.53549	1.58924	-2.22464	0.0261054	0.297172	0	0	5.69934	2.11845	1.84709	95.4317	117.457	128.805	115.455	158.234	0	2.40124	-Inf	-0.33391	-Inf	TJP2	-	-
chr12:65626611-65626700:mpeak_19747|chr12_65563350_65639941_LEMD3_NM_+|	85.8147	-3.08248	1.5597	-1.97632	0.0481183	0.384412	0	1.08756	3.4196	3.17767	4.30987	210.837	172.922	165.281	122.87	174.242	0.283396	2.35885	-2.74114	0.316046	-3.05719	LEMD3	-	-
chr13:99171565-99171737:mpeak_23987|chr13_99105463_99229405_STK24_NM_-|	159.547	-1.81891	0.908335	-2.00247	0.0452346	0.371261	1.10967	3.26268	10.2588	4.2369	6.77266	274.089	392.61	245.072	337.892	320.162	0.655822	2.35497	-1.69726	0.147069	-1.84433	STK24	-	-
chr1:155192162-155192212:mpeak_5802|chr1_155184264_155197325_GBAP1_NR_-|	71.8123	-4.26428	1.56004	-2.73344	0.00626762	0.200035	0	0	3.4196	2.11845	3.07848	165.341	169.66	118.546	126.048	129.912	0	2.30077	-Inf	0.424137	-Inf	GBAP1	-	-
chr1:6740554-6740604:mpeak_318|chr1_6695760_6761966_DNAJC11_NM_-|	61.1383	-4.30172	1.63446	-2.63189	0.0084912	0.203161	0	0	1.13987	0	6.15696	116.515	168.572	103.728	111.219	104.053	0	2.28741	-Inf	0.422814	-Inf	DNAJC11	-	-
chr7:140916126-140916176:mpeak_78716|chr7_140774031_141170335_TMEM178B_NM_+|	123.512	-5.3532	1.54871	-3.45655	0.000547147	0.0909189	0	0	0	6.35534	6.15696	362.862	306.692	192.638	191.72	168.701	0	2.26239	-Inf	0.860733	-Inf	TMEM178B	-	-
chr17:7844311-7844363:mpeak_35056|chr17_7835441_7852702_CNTROB_NM_+|	48.7357	-3.62577	1.7443	-2.07864	0.0376509	0.344633	0	0	0	0	6.77266	107.638	71.779	100.308	90.034	110.825	0	2.2488	-Inf	-0.162288	-Inf	CNTROB	-	-
chr13:96752243-96752309:mpeak_23917|chr13_96743092_97484743_HS6ST3_NM_+|	76.6757	-4.36046	1.73537	-2.51269	0.0119813	0.220256	0	0	1.13987	0	8.61975	174.218	145.733	116.267	124.988	195.791	0	2.23308	-Inf	0.135029	-Inf	HS6ST3	-	-
chr16:14702910-14702960:mpeak_31524|chr16_14530629_14724128_PARN_NM_-|	66.5707	-3.75364	1.56176	-2.40346	0.0162406	0.247105	0	0	4.55947	0	4.92557	113.186	114.194	147.043	145.114	136.685	0	2.21178	-Inf	-0.330374	-Inf	PARN	-	-
chr12:21641336-21641392:mpeak_17814|chr12_21623280_21654603_RECQL_NM_-|	84.0813	-3.87398	1.54845	-2.50184	0.012355	0.220573	0	0	4.55947	4.2369	3.07848	153.135	130.507	164.141	185.364	195.791	0	2.17769	-Inf	-0.358008	-Inf	RECQL	-	-
chr1:180010212-180010357:mpeak_6848|chr1_179923907_180080131_CEP350_NM_+|	108.177	-3.0955	1.56485	-1.97815	0.0479117	0.383427	1.10967	0	6.83921	3.17767	3.07848	195.302	264.277	184.659	247.858	175.473	0.241454	2.15388	-2.97589	0.181228	-3.15712	CEP350	-	-
chr22:39089758-39089811:mpeak_55627|chr22_39084006_39096459_JOSD1_NM_-|	96.9623	-4.40904	1.59656	-2.76159	0.00575213	0.197682	0	0	0	4.2369	8.61975	162.012	191.411	210.876	225.615	166.854	0	2.1309	-Inf	-0.186624	-Inf	JOSD1	-	-
chr5:106763976-106764052:mpeak_67855|chr5_106717077_107006596_EFNA5_NM_-|	160.505	-1.97404	0.941364	-2.097	0.0359933	0.337468	2.21934	1.08756	6.83921	7.41457	6.15696	301.83	317.568	337.401	309.293	315.236	0.53389	2.12185	-2.04081	-0.0501036	-1.99071	EFNA5	-	-
chr10:30633145-30633195:mpeak_9912|chr10_30602900_30638267_MTPAP_NM_-|	108.413	-4.5312	1.53768	-2.94678	0.00321098	0.179565	0	0	3.4196	4.2369	6.15696	181.986	236.001	204.036	219.259	229.039	0	2.11754	-Inf	-0.057193	-Inf	MTPAP	-	-
chr11:68347500-68347680:mpeak_15305|chr11_68228185_68380533_PPP6R3_NM_+|	375.195	-1.21977	0.619324	-1.96952	0.0488933	0.387451	8.87736	5.43781	18.2379	11.6515	14.161	634.731	961.404	600.711	716.035	780.703	0.896864	2.10019	-1.03665	0.19091	-1.22756	PPP6R3	-	-
chr5:175875427-175875480:mpeak_69897|chr5_175875355_175933768_FAF2_NM_+|	150.837	-2.37775	1.13267	-2.09924	0.0357962	0.33729	2.21934	0	7.97908	6.35534	4.92557	248.566	318.655	329.422	289.168	301.075	0.391265	2.09424	-2.53244	-0.112234	-2.42021	FAF2	-	-
chr11:46119274-46119367:mpeak_14157|chr11_45955776_46142985_PHF21A_NM_-|	100.139	-3.13487	1.56833	-1.99886	0.0456233	0.371979	0	1.08756	0	6.35534	4.92557	218.605	221.862	217.715	184.305	146.536	0.246911	2.05648	-2.78975	0.268361	-3.05811	PHF21A	-	-
chr3:195616432-195616513:mpeak_61493|chr3_195591058_195635880_TNK2_NM_-|	75.9799	-3.78212	1.64324	-2.30162	0.0213563	0.272659	0	0	6.83921	0	2.46279	117.625	171.835	110.567	188.542	161.928	0	2.01762	-Inf	-0.0865581	-Inf	TNK2	-	-
chr1:161096535-161096585:mpeak_6198|chr1_161092313_161102478_DEDD_NM_-|	76.3954	-3.88671	1.58087	-2.45858	0.0139486	0.227582	0	0	4.55947	0	4.92557	124.283	154.434	133.365	166.298	176.089	0	1.9937	-Inf	-0.186447	-Inf	DEDD	-	-
chr13:97933070-97933120:mpeak_23935|chr13_97874542_98043575_MBNL2_NM_+|	54.5264	-3.81528	1.76573	-2.16074	0.0307158	0.316676	0	0	0	0	6.15696	143.147	87.0049	133.365	82.6195	92.9701	0	1.99284	-Inf	0.160159	-Inf	MBNL2	-	-
chr8:96155785-96155836:mpeak_81319|chr8_96145948_96166258_PLEKHF2_NM_+|	129.723	-2.3003	1.1452	-2.00864	0.0445751	0.369215	0	2.17512	4.55947	3.17767	7.38836	236.36	276.241	257.61	227.733	281.989	0.424331	1.97118	-2.21285	0.00294545	-2.2158	PLEKHF2	-	-
chr12:50916699-50916784:mpeak_18778|chr12_50898767_51138369_DIP2B_NM_+|	119.351	-3.06454	1.53743	-1.99329	0.0462299	0.374939	0	1.08756	3.4196	5.29612	5.54127	238.579	214.25	283.827	238.325	203.18	0.240171	1.96558	-3.12754	-0.0947144	-3.03282	DIP2B	-	-
chr8:141198809-141198926:mpeak_82451|chr8_140743471_141468678_TRAPPC9_NM_-|	107.242	-4.4877	1.5649	-2.86772	0.00413443	0.184529	0	0	6.83921	0	4.92557	215.276	239.263	204.036	230.911	171.164	0	1.94103	-Inf	0.169787	-Inf	TRAPPC9	-	-
chr4:6796219-6796354:mpeak_62158|chr4_6784458_6882513_KIAA0232_NM_+|	68.3743	-3.77316	1.65113	-2.28519	0.0223015	0.278472	0	0	1.13987	0	7.38836	98.7607	137.033	141.344	147.232	150.846	0	1.94078	-Inf	-0.313119	-Inf	KIAA0232	-	-
chr4:42031579-42031654:mpeak_62842|chr4_41992522_42088098_SLC30A9_NM_+|	106.517	-3.98075	1.55139	-2.56593	0.01029	0.212915	0	0	7.97908	1.05922	4.92557	171.999	158.784	242.792	205.489	272.138	0	1.9383	-Inf	-0.53799	-Inf	SLC30A9	-	-
chr1:179196473-179196549:mpeak_6783|chr1_179078576_179198819_ABL2_NM_-|	136.327	-2.45282	1.18598	-2.06818	0.038623	0.348511	2.21934	0	9.11895	1.05922	3.07848	324.024	339.319	190.358	259.51	234.58	0.334569	1.93684	-1.99355	0.539776	-2.53333	ABL2	-	-
chr15:55487591-55487741:mpeak_28886|chr15_55474423_55489231_RSL24D1_NM_-|	106.145	-4.17717	1.55882	-2.6797	0.00736872	0.203115	0	0	1.13987	6.35534	5.54127	177.547	187.061	182.379	271.161	230.27	0	1.90645	-Inf	-0.322289	-Inf	RSL24D1	-	-
chr1:33222755-33222805:mpeak_1602|chr1_33207511_33238465_KIAA1522_NM_+|	87.6503	-3.77549	1.6118	-2.34241	0.0191599	0.260965	0	0	3.4196	4.2369	3.07848	147.586	150.083	168.701	270.102	129.296	0	1.88963	-Inf	-0.347468	-Inf	KIAA1522	-	-
chr6:152200372-152200740:mpeak_74522|chr6_152011630_152419866_ESR1_NM_+|	1238.14	-1.45661	0.439264	-3.31602	0.000913091	0.111128	33.2901	15.2259	35.3359	24.3621	33.8633	3779.54	3386.67	1805.55	1639.68	1627.9	0.677011	1.84425	-0.362491	1.08329	-1.44579	ESR1	-	-
chr1:90347089-90347139:mpeak_3274|chr1_90286572_90398625_LRRC8D_NM_+|	92.6925	-4.41351	1.59499	-2.76711	0.00565559	0.197157	0	0	0	2.11845	7.38836	198.631	195.761	158.442	200.193	164.391	0	1.81765	-Inf	0.17771	-Inf	LRRC8D	-	-
chr12:108141339-108141506:mpeak_20960|chr12_108128299_108154914_PRDM4_NM_-|	210.012	-2.38543	1.07014	-2.22909	0.0258076	0.296489	0	3.26268	6.83921	3.17767	11.0825	343.998	560.094	291.806	480.888	398.971	0.36088	1.80081	-2.10811	0.210943	-2.31905	PRDM4	-	-
chr9:103100042-103100092:mpeak_84728|chr9_103064586_103115259_TEX10_NM_-|	77.2692	-3.82593	1.59395	-2.40028	0.0163827	0.247105	0	0	2.27974	2.11845	3.69418	128.722	177.272	127.665	187.483	143.457	0	1.76456	-Inf	0.00121451	-Inf	TEX10	-	-
chr4:53579203-53579253:mpeak_62991|chr4_53578620_53579660_DANCR_NR_+|	104.637	-3.91125	1.59263	-2.45585	0.0140552	0.228974	0	0	4.55947	6.35534	0	207.508	204.461	222.274	209.726	191.482	0	1.75062	-Inf	-0.0128471	-Inf	DANCR	-	-
chr5:49708836-49708894:mpeak_66479|chr5_49695124_49737234_EMB_NM_-|	68.9716	-3.77418	1.57829	-2.39131	0.0167884	0.247105	0	0	1.13987	1.05922	4.92557	124.283	145.733	133.365	134.521	144.689	0	1.72688	-Inf	-0.0266463	-Inf	EMB	-	-
chr9:128097026-128097170:mpeak_85572|chr9_128024072_128124884_GAPVD1_NM_+|	130.62	-4.67155	1.64965	-2.83185	0.00462799	0.194494	0	0	0	5.29612	7.38836	302.94	249.051	267.869	150.41	323.241	0	1.71061	-Inf	0.159124	-Inf	GAPVD1	-	-
chr6:152282239-152282446:mpeak_74536|chr6_152011630_152419866_ESR1_NM_+|	1237.06	-1.40055	0.378388	-3.70136	0.000214448	0.0678644	24.4127	21.7512	25.0771	28.599	31.4005	3779.54	3386.67	1805.55	1639.68	1627.9	0.64419	1.677	-0.297034	1.08329	-1.38033	ESR1	-	-
chr20:60967442-60967492:mpeak_53460|chr20_60966167_60982339_CABLES2_NM_-|	69.796	-4.09902	1.66332	-2.46437	0.0137256	0.226979	0	0	0	0	6.15696	176.438	145.733	118.546	140.877	110.21	0	1.6657	-Inf	0.386696	-Inf	CABLES2	-	-
chr17:1451582-1451635:mpeak_34485|chr17_1423832_1466110_PITPNA_NM_-|	243.427	-1.82935	0.802657	-2.27912	0.02266	0.280356	5.54835	0	10.2588	2.11845	8.61975	559.274	586.195	406.933	431.104	424.215	0.484374	1.66346	-1.33509	0.444902	-1.77999	PITPNA	-	-
chr1:202869133-202869208:mpeak_7482|chr1_202861787_202897772_KLHL12_NM_-|	129.837	-4.26411	1.56446	-2.72562	0.00641812	0.200035	0	0	3.4196	5.29612	4.92557	168.67	292.554	275.848	285.99	261.671	0	1.65648	-Inf	-0.251356	-Inf	KLHL12	-	-
chr4:899076-899134:mpeak_61847|chr4_843562_926178_GAK_NM_-|	186.482	-3.75544	1.5215	-2.46825	0.0135776	0.226979	0	1.08756	3.4196	6.35534	6.15696	397.262	479.614	296.366	353.781	320.778	0.124027	1.6409	-3.28779	0.437977	-3.72577	GAK	-	-
chr7:102114800-102114852:mpeak_77724|chr7_102114131_102119381_POLR2J_NM_-|	104.113	-4.00644	1.58032	-2.53522	0.0112378	0.219841	0	0	5.69934	2.11845	1.84709	234.14	202.286	158.442	219.259	217.341	0	1.62424	-Inf	0.137711	-Inf	POLR2J	-	-
chr5:179004092-179004142:mpeak_70112|chr5_178977561_179036376_RUFY1_NM_+|	77.1191	-3.40468	1.6188	-2.10322	0.0354469	0.335549	0	0	4.55947	0	3.69418	98.7607	155.521	145.903	154.647	208.105	0	1.62264	-Inf	-0.415297	-Inf	RUFY1	-	-
chr10:105781921-105781971:mpeak_12227|chr10_105726942_105785331_SLK_NM_+|	69.1253	-3.4924	1.62893	-2.14399	0.0320338	0.321249	0	0	1.13987	1.05922	4.92557	103.199	139.208	106.008	169.476	166.238	0	1.61293	-Inf	-0.280742	-Inf	SLK	-	-
chr3:119762212-119762270:mpeak_59058|chr3_119545702_119813264_GSK3B_NM_-|	167.85	-2.6156	1.29175	-2.02485	0.0428832	0.364136	0	2.17512	1.13987	2.11845	11.6982	368.411	365.421	297.506	373.906	256.13	0.296406	1.61249	-2.19665	0.246999	-2.44365	GSK3B	-	-
chr3:17613048-17613101:mpeak_56751|chr3_17202748_17782399_TBC1D5_NM_-|	86.1908	-4.06283	1.78117	-2.28098	0.0225495	0.280168	0	0	0	0	8.00405	160.902	191.411	120.826	199.134	181.63	0	1.59573	-Inf	0.0753099	-Inf	TBC1D5	-	-
chr3:9732490-9732542:mpeak_56341|chr3_9691116_9743473_MTMR14_NM_+|	169.586	-4.4368	1.57286	-2.82084	0.00478978	0.194494	0	0	7.97908	3.17767	6.77266	350.656	195.761	323.723	446.992	360.798	0	1.58455	-Inf	-0.465217	-Inf	MTMR14	-	-
chr12:117372292-117372342:mpeak_21432|chr12_117348760_117465832_FBXW8_NM_+|	62.3916	-3.50636	1.68945	-2.07545	0.0379448	0.345481	0	0	0	0	6.15696	98.7607	129.42	110.567	128.166	150.846	0	1.58041	-Inf	-0.186778	-Inf	FBXW8	-	-
chr1:19416709-19416889:mpeak_831|chr1_19401390_19536746_UBR4_NM_-|	100.004	-4.27098	1.57316	-2.7149	0.00662955	0.202849	0	0	0	4.2369	4.30987	227.482	221.862	164.141	216.082	161.928	0	1.57646	-Inf	0.314091	-Inf	UBR4	-	-
chr10:74111894-74111956:mpeak_10925|chr10_74095689_74114907_DNAJB12_NM_-|	122.935	-4.53149	1.5761	-2.87514	0.00403853	0.184529	0	0	0	3.17767	8.00405	253.005	253.402	209.736	263.747	238.274	0	1.571	-Inf	0.093874	-Inf	DNAJB12	-	-
chr13:47268972-47269154:mpeak_23316|chr13_47127295_47324674_LRCH1_NM_+|	99.3026	-3.99408	1.56449	-2.55296	0.0106811	0.215362	0	0	5.69934	0	3.07848	218.605	200.111	174.4	195.956	195.176	0	1.55214	-Inf	0.151327	-Inf	LRCH1	-	-
chr19:54629932-54630001:mpeak_44224|chr19_54618789_54634737_PRPF31_NM_+|	115.701	-4.03828	1.55739	-2.59299	0.00951461	0.209033	0	0	6.83921	0	4.30987	204.179	220.775	212.015	266.924	241.969	0	1.54653	-Inf	-0.177546	-Inf	PRPF31	-	-
chr3:15838845-15838967:mpeak_56718|chr3_15712063_15901053_ANKRD28_NM_-|	99.025	-4.23006	1.80764	-2.3401	0.0192785	0.261236	0	0	0	0	8.61975	155.354	263.19	165.281	192.779	205.027	0	1.5308	-Inf	0.156984	-Inf	ANKRD28	-	-
chr5:32390376-32390426:mpeak_66075|chr5_32356045_32444844_ZFR_NM_-|	70.5092	-3.57799	1.72854	-2.06995	0.038457	0.347593	0	0	0	0	6.77266	147.586	106.581	165.281	163.12	115.751	0	1.52485	-Inf	-0.220314	-Inf	ZFR	-	-
chr19:39336019-39336069:mpeak_42893|chr19_39327420_39342979_HNRNPL_NM_-mpeak_42893|chr19_39327420_39342979_HNRNPL_NM_-||	119.303	-3.91614	1.56898	-2.49597	0.0125612	0.222051	0	0	6.83921	2.11845	2.46279	189.754	241.439	221.134	236.207	293.071	0	1.52189	-Inf	-0.214391	-Inf	HNRNPL	-	-
chr7:2606699-2606797:mpeak_75138|chr7_2598605_2649677_IQCE_NM_+|	139.062	-4.69603	1.56144	-3.0075	0.0026341	0.16935	0	0	4.55947	1.05922	5.54127	277.418	367.596	224.554	226.674	283.22	0	1.5195	-Inf	0.39763	-Inf	IQCE	-	-
chr2:98471063-98471121:mpeak_47436|chr2_98373846_98612354_TMEM131_NM_-|	69.5045	-3.68841	1.69266	-2.17905	0.0293277	0.310604	0	0	0	0	6.15696	110.967	164.222	119.686	141.936	152.077	0	1.48827	-Inf	-0.00319792	-Inf	TMEM131	-	-
chr14:78190732-78190782:mpeak_26731|chr14_78184629_78227497_SNW1_NM_-|	124.11	-4.45383	1.56664	-2.84292	0.00447029	0.191237	0	0	0	3.17767	7.38836	237.469	274.065	225.694	260.569	232.733	0	1.46955	-Inf	0.0938109	-Inf	SNW1	-	-
chr3:180673531-180673584:mpeak_60995|chr3_180630233_180693909_FXR1_NM_+|	165.402	-4.29514	1.55282	-2.76602	0.00567451	0.197157	0	0	7.97908	1.05922	7.38836	287.405	231.651	427.451	377.084	314.005	0	1.46858	-Inf	-0.522694	-Inf	FXR1	-	-
chr22:50274291-50274341:mpeak_56101|chr22_50247496_50276981_ZBED4_NM_+|	103.879	-4.70462	1.66302	-2.82896	0.00466995	0.194494	0	0	0	0	6.77266	291.843	275.153	129.945	162.061	173.011	0	1.45643	-Inf	0.871019	-Inf	ZBED4	-	-
chr19:11112842-11112991:mpeak_41399|chr19_11071597_11172459_SMARCA4_NM_+|	204.072	-5.10689	1.5999	-3.192	0.00141293	0.126212	0	0	5.69934	0	11.0825	388.385	480.702	368.177	395.09	391.583	0	1.45316	-Inf	0.174828	-Inf	SMARCA4	-	-
chr2:26485100-26485150:mpeak_45265|chr2_26467615_26512785_HADHB_NM_+|	70.2315	-3.58125	1.78802	-2.00291	0.0451872	0.371261	0	0	0	0	6.15696	90.993	180.535	107.148	137.699	179.783	0	1.44996	-Inf	-0.0601423	-Inf	HADHB	-	-
chr10:105660348-105660398:mpeak_12213|chr10_105642599_105678045_OBFC1_NM_-|	76.4764	-3.39324	1.72923	-1.96228	0.0497296	0.389868	0	0	0	0	7.38836	123.173	117.457	174.4	204.43	137.916	0	1.42978	-Inf	-0.517676	-Inf	OBFC1	-	-
chr1:16896184-16896237:mpeak_750|chr1_16890681_16940100_NBPF1_NM_-|	153.602	-4.57597	1.54679	-2.95837	0.00309273	0.177718	0	0	7.97908	0	3.69418	339.559	359.983	290.666	266.924	267.212	0	1.41528	-Inf	0.347323	-Inf	NBPF1	-	-
chr1:155410557-155410687:mpeak_5844|chr1_155307542_155532324_ASH1L_NM_-|	202.96	-3.27332	1.54103	-2.12411	0.0336609	0.328653	1.10967	0	5.69934	7.41457	4.30987	318.475	461.126	376.157	378.143	477.165	0.142338	1.41488	-3.38789	-0.0746036	-3.31329	ASH1L	-	-
chr16:70584055-70584175:mpeak_33411|chr16_70557690_70605575_SF3B3_NM_+|	724.431	-1.19409	0.579626	-2.06011	0.0393882	0.351798	6.65802	9.78805	30.7764	15.8884	15.3924	1491.4	1263.75	1410.02	1668.28	1332.37	0.596923	1.40698	-1.33089	-0.0939053	-1.23699	SF3B3	-	-
chr16:8937897-8937954:mpeak_31267|chr16_8891669_8941580_PMM2_NM_+|	232.187	-3.89801	1.55518	-2.50646	0.0121946	0.220256	0	1.08756	4.55947	4.2369	8.00405	539.3	565.532	295.226	522.197	381.732	0.0984368	1.40102	-3.36437	0.466771	-3.83114	PMM2	-	-
chr1:202760557-202760664:mpeak_7466|chr1_202698301_202777549_KDM5B_NM_-|	275.365	-2.53157	0.966009	-2.62065	0.00877622	0.206155	2.21934	1.08756	6.83921	6.35534	4.92557	643.609	778.694	438.849	383.439	487.631	0.232503	1.3833	-1.86908	0.703712	-2.57279	KDM5B	-	-
chr12:110840721-110840778:mpeak_21111|chr12_110812138_110841535_ANAPC7_NM_-|	168.968	-4.34336	1.87732	-2.31359	0.0206902	0.269571	0	0	12.5386	1.05922	0	379.507	284.941	328.282	352.722	330.629	0	1.34414	-Inf	-0.021494	-Inf	ANAPC7	-	-
chr4:54267883-54267933:mpeak_63014|chr4_54243819_54325468_FIP1L1_NM_+|	81.3553	-3.84889	1.67976	-2.29133	0.0219441	0.277539	0	0	0	0	6.15696	149.806	193.586	129.945	149.351	184.709	0	1.32692	-Inf	0.150678	-Inf	FIP1L1	-	-
chr8:141163496-141163546:mpeak_82450|chr8_140743471_141468678_TRAPPC9_NM_-|	106.858	-3.99804	1.57542	-2.53776	0.0111565	0.219841	0	0	0	4.2369	3.69418	215.276	239.263	204.036	230.911	171.164	0	1.30852	-Inf	0.169787	-Inf	TRAPPC9	-	-
chr12:65221191-65221243:mpeak_19729|chr12_65218351_65268780_TBC1D30_NM_+|	144.608	-3.28963	1.58632	-2.07375	0.0381024	0.345481	0	1.08756	2.27974	0	7.38836	343.998	350.195	207.456	284.931	248.741	0.156666	1.30451	-2.56717	0.490574	-3.05775	TBC1D30	-	-
chr13:99208733-99208783:mpeak_23989|chr13_99105463_99229405_STK24_NM_-|	158.271	-3.09202	1.56859	-1.97121	0.0487003	0.386209	1.10967	0	4.55947	1.05922	6.15696	274.089	392.61	245.072	337.892	320.162	0.166443	1.30388	-2.82264	0.147069	-2.96971	STK24	-	-
chr14:32555503-32555553:mpeak_24815|chr14_32546494_32623826_ARHGAP5_NM_+|	82.4673	-3.2906	1.5973	-2.0601	0.0393891	0.351798	0	0	2.27974	0	4.92557	125.393	135.945	174.4	223.496	158.234	0	1.29562	-Inf	-0.504543	-Inf	ARHGAP5	-	-
chr6:76590164-76590214:mpeak_72729|chr6_76458892_76624529_MYO6_NM_+|	107.597	-4.02856	1.60582	-2.50872	0.012117	0.220256	0	0	3.4196	0	4.30987	204.179	263.19	156.162	248.918	195.791	0	1.28638	-Inf	0.22247	-Inf	MYO6	-	-
chrX:154317681-154317733:mpeak_88807|chrX_154299694_154349497_BRCC3_NM_+|	153.447	-4.243	1.59379	-2.6622	0.00776307	0.203115	0	0	0	4.2369	8.61975	276.308	245.789	398.954	271.161	329.398	0	1.28629	-Inf	-0.351945	-Inf	BRCC3	-	-
chr2:135817410-135817467:mpeak_48441|chr2_135809834_135926114_RAB3GAP1_NM_+|	162.823	-4.18816	1.64031	-2.55328	0.0106714	0.215362	0	0	6.83921	5.29612	0	295.172	371.946	255.33	380.261	313.389	0	1.27877	-Inf	0.0765253	-Inf	RAB3GAP1	-	-
chr14:89076505-89076555:mpeak_26853|chr14_89029252_89078088_ZC3H14_NM_+|	109.354	-3.88799	1.57601	-2.46698	0.0136259	0.226979	0	0	0	4.2369	3.69418	191.973	253.402	209.736	234.088	196.407	0	1.23878	-Inf	0.0613888	-Inf	ZC3H14	-	-
chr14:24452311-24452391:mpeak_24609|chr14_24439082_24475094_DHRS4L2_NM_+|	127.325	-3.95811	1.54704	-2.55851	0.0105121	0.215362	0	0	4.55947	1.05922	3.69418	245.237	256.664	243.932	259.51	258.592	0	1.22211	-Inf	-0.0174886	-Inf	DHRS4L2	-	-
chr8:101273641-101273691:mpeak_81525|chr8_101271474_101348446_RNF19A_NM_-|	100.756	-3.67365	1.57403	-2.33392	0.0196002	0.262853	0	0	2.27974	0	5.54127	168.67	189.236	199.477	206.549	235.812	0	1.21853	-Inf	-0.257666	-Inf	RNF19A	-	-
chr7:133045267-133045317:mpeak_78454|chr7_132937822_133749043_EXOC4_NM_+|	114.704	-3.94615	1.57267	-2.50921	0.0121003	0.220256	0	0	1.13987	3.17767	3.69418	204.179	274.065	202.897	243.621	214.262	0	1.21246	-Inf	0.118541	-Inf	EXOC4	-	-
chr9:114197359-114197409:mpeak_84982|chr9_114124449_114247025_KIAA0368_NM_-|	177.495	-4.52094	1.54691	-2.92256	0.00347169	0.18265	0	0	4.55947	3.17767	4.30987	331.791	431.762	294.086	331.537	373.728	0	1.20548	-Inf	0.1967	-Inf	KIAA0368	-	-
chr6:79774353-79774460:mpeak_72767|chr6_79651047_79788011_PHIP_NM_-|	145.743	-4.33676	1.55392	-2.79086	0.00525683	0.197157	0	0	0	5.29612	4.30987	309.598	329.531	253.051	305.056	250.588	0	1.18784	-Inf	0.245473	-Inf	PHIP	-	-
chr17:7411916-7411974:mpeak_34982|chr17_7387697_7416339_POLR2A_NM_+|	365.351	-3.94967	1.57186	-2.51274	0.0119796	0.220256	1.10967	0	11.3987	10.5922	2.46279	631.402	926.602	652.005	768.997	648.944	0.0712238	1.18137	-3.87689	0.175069	-4.05196	POLR2A	-	-
chr8:141873214-141873353:mpeak_82515|chr8_141669777_142011412_PTK2_NM_-|	135.254	-3.82983	1.59443	-2.40201	0.0163055	0.247105	0	0	5.69934	1.05922	3.07848	245.237	256.664	213.155	369.669	257.977	0	1.16996	-Inf	-0.159398	-Inf	PTK2	-	-
chr5:255267-255324:mpeak_65603|chr5_218337_256448_SDHA_NM_+|	152.059	-4.42382	1.58576	-2.78972	0.00527536	0.197157	0	0	0	4.2369	5.54127	267.431	401.31	251.911	266.924	323.241	0	1.1612	-Inf	0.252459	-Inf	SDHA	-	-
chr1:47174928-47174978:mpeak_2396|chr1_47144308_47184736_EFCAB14_NM_-|	116.75	-3.87147	1.55919	-2.483	0.0130282	0.225149	0	0	0	4.2369	3.69418	227.482	244.701	221.134	222.437	243.816	0	1.1538	-Inf	0.0431877	-Inf	EFCAB14	-	-
chr5:65336963-65337053:mpeak_66798|chr5_65222381_65374250_ERBB2IP_NM_+|	150.087	-3.92644	1.53703	-2.55456	0.0106323	0.215362	0	0	4.55947	3.17767	3.07848	272.979	277.328	321.443	313.53	304.77	0	1.15091	-Inf	-0.187067	-Inf	ERBB2IP	-	-
chr1:202743734-202743842:mpeak_7465|chr1_202698301_202777549_KDM5B_NM_-|	274.697	-5.36848	1.55232	-3.45835	0.000543493	0.0909189	0	0	7.97908	0	6.77266	643.609	778.694	438.849	383.439	487.631	0	1.12616	-Inf	0.703712	-Inf	KDM5B	-	-
chr10:70890267-70890317:mpeak_10779|chr10_70883907_70930911_VPS26A_NM_+|	104.676	-3.65995	1.67921	-2.17957	0.0292896	0.310604	0	0	2.27974	0	4.92557	130.941	268.628	158.442	219.259	262.287	0	1.12585	-Inf	-0.094638	-Inf	VPS26A	-	-
chr10:89691151-89691220:mpeak_11391|chr10_89623194_89725043_PTEN_NM_+|	187.656	-4.11773	1.53224	-2.6874	0.00720111	0.203115	0	0	4.55947	6.35534	2.46279	337.34	337.144	369.317	417.334	402.05	0	1.1254	-Inf	-0.232568	-Inf	PTEN	-	-
chr19:10822783-10822833:mpeak_41373|chr19_10812111_10823793_QTRT1_NM_+|	116.372	-3.96584	1.75953	-2.25391	0.0242017	0.287657	0	0	0	0	7.38836	269.65	206.637	242.792	279.635	157.618	0	1.08645	-Inf	0.0711614	-Inf	QTRT1	-	-
chr18:60199166-60199227:mpeak_40417|chr18_60190657_60251678_ZCCHC2_NR_+mpeak_40417|chr18_60190657_60243744_ZCCHC2_NM_+||	151.457	-4.22961	1.56624	-2.70048	0.00692398	0.203115	0	0	0	5.29612	3.69418	349.546	318.655	329.422	249.977	257.977	0	1.07363	-Inf	0.259371	-Inf	ZCCHC2	-	-
chr18:32374575-32374625:mpeak_39908|chr18_32073253_32467729_DTNA_NM_+|	152.018	-4.292	1.57097	-2.73208	0.00629363	0.200035	0	0	2.27974	0	6.77266	285.185	353.457	289.527	292.346	290.609	0	1.03755	-Inf	0.134848	-Inf	DTNA	-	-
chr1:62148703-62148753:mpeak_2733|chr1_62147022_62191095_TM2D1_NM_-|	125.382	-4.15513	1.83178	-2.26836	0.0233074	0.283532	0	0	0	0	6.77266	171.999	413.273	156.162	234.088	271.522	0	1.02341	-Inf	0.407735	-Inf	TM2D1	-	-
chr8:61497310-61497382:mpeak_80497|chr8_61429468_61533232_RAB2A_NM_+|	618.237	-2.46066	1.03468	-2.37819	0.0173981	0.251225	2.21934	2.17512	23.9372	2.11845	12.3139	1028.66	1359.45	1055.52	1421.48	1274.49	0.184014	1.02278	-2.54124	-0.0666275	-2.47462	RAB2A	-	-
chr2:219604775-219604872:mpeak_50524|chr2_219575567_219618856_TTLL4_NM_+|	97.2038	-3.54023	1.63507	-2.16519	0.0303731	0.31605	0	0	0	0	6.15696	186.425	169.66	202.897	227.733	179.168	0	1.00967	-Inf	-0.191149	-Inf	TTLL4	-	-
chr9:124910381-124910445:mpeak_85353|chr9_124906657_124922098_NDUFA8_NM_-|	198.526	-4.13657	1.70911	-2.4203	0.0155076	0.240657	0	0	9.11895	2.11845	0	328.462	502.453	320.303	388.735	434.066	0	0.98306	-Inf	0.12478	-Inf	NDUFA8	-	-
chr3:180675420-180675475:mpeak_60996|chr3_180630233_180693909_FXR1_NM_+|	164.843	-3.77266	1.56544	-2.40997	0.015954	0.244771	0	0	0	5.29612	5.54127	287.405	231.651	427.451	377.084	314.005	0	0.968887	-Inf	-0.522694	-Inf	FXR1	-	-
chr6:128515413-128515463:mpeak_73829|chr6_128291425_128841819_PTPRK_NM_-|	175.861	-3.91715	1.58193	-2.47619	0.0132793	0.226587	0	0	5.69934	2.11845	2.46279	292.953	381.734	280.408	434.282	358.951	0	0.957544	-Inf	-0.0852581	-Inf	PTPRK	-	-
chr4:41075486-41075547:mpeak_62803|chr4_40818276_41216635_APBB2_NM_-|	179.945	-4.3279	1.60847	-2.69069	0.00713044	0.203115	0	0	1.13987	1.05922	8.00405	329.572	389.347	408.073	281.754	380.5	0	0.953274	-Inf	0.0108124	-Inf	APBB2	-	-
chr1:109956886-109957031:mpeak_3906|chr1_109944712_109969108_PSMA5_NM_-|	188.659	-3.714	1.58982	-2.33612	0.0194851	0.261765	0	0	6.83921	4.2369	0.615696	285.185	361.07	346.52	474.532	407.591	0	0.951603	-Inf	-0.341927	-Inf	PSMA5	-	-
chr9:129583805-129583858:mpeak_85616|chr9_129567284_129594765_ZBTB43_NM_+|	151.74	-4.41454	1.57282	-2.80676	0.00500423	0.197157	0	0	0	2.11845	4.92557	395.043	367.596	214.295	263.747	269.675	0	0.94207	-Inf	0.613469	-Inf	ZBTB43	-	-
chr4:125632617-125632701:mpeak_64505|chr4_125588669_125633887_ANKRD50_NM_-|	191.837	-3.94266	1.58582	-2.4862	0.0129115	0.223847	0	0	3.4196	6.35534	1.23139	438.32	296.904	398.954	337.892	435.297	0	0.938993	-Inf	-0.0879311	-Inf	ANKRD50	-	-
chr19:54631505-54631582:mpeak_44225|chr19_54618789_54634737_PRPF31_NM_+|	115.254	-3.6043	1.58817	-2.26947	0.0232398	0.283532	0	0	1.13987	0	5.54127	204.179	220.775	212.015	266.924	241.969	0	0.926766	-Inf	-0.177546	-Inf	PRPF31	-	-
chr20:54964631-54964734:mpeak_53176|chr20_54945396_54967351_AURKA_NM_-|	744.171	-2.18602	0.851096	-2.56848	0.0102145	0.212605	4.43868	0	17.098	11.6515	19.7023	968.742	1160.43	1419.14	1933.08	1907.43	0.20847	0.921198	-2.86338	-0.719712	-2.14367	AURKA	-	-
chr9:111848702-111848784:mpeak_84930|chr9_111782785_111882225_TMEM245_NM_-|	348.635	-2.50735	1.15489	-2.17107	0.0299259	0.31412	0	2.17512	12.5386	2.11845	3.69418	735.711	731.929	616.669	667.311	714.208	0.148205	0.918391	-2.49174	0.139769	-2.63151	TMEM245	-	-
chr5:133949409-133949544:mpeak_68647|chr5_133942756_133968533_SAR1B_NM_-|	123.068	-3.53405	1.73398	-2.03812	0.0415384	0.359212	0	0	0	0	7.38836	239.689	176.185	213.155	332.596	261.671	0	0.915054	-Inf	-0.372216	-Inf	SAR1B	-	-
chr4:1940207-1940265:mpeak_61933|chr4_1873122_1980364_WHSC1_NM_+|	263.174	-4.06215	1.58606	-2.56116	0.0104323	0.214468	0	0	11.3987	3.17767	1.84709	360.643	458.951	556.256	692.732	546.738	0	0.914585	-Inf	-0.546624	-Inf	WHSC1	-	-
chr10:22170244-22170294:mpeak_9639|chr10_22045684_22292650_DNAJC1_NM_-|	110.097	-3.60927	1.6419	-2.19822	0.0279333	0.305405	0	0	0	0	6.15696	181.986	234.913	217.715	252.095	208.105	0	0.90822	-Inf	-0.116444	-Inf	DNAJC1	-	-
chr1:53714923-53714977:mpeak_2586|chr1_53712728_53793821_LRP8_NM_-|	231.046	-4.42495	1.53199	-2.88837	0.00387244	0.183069	0	0	3.4196	5.29612	3.07848	524.874	469.826	420.611	448.052	435.297	0	0.904491	-Inf	0.194397	-Inf	LRP8	-	-
chr2:20479450-20479503:mpeak_45060|chr2_20451477_20550611_PUM2_NM_-|	285.535	-1.95744	0.980627	-1.99611	0.0459222	0.373498	1.10967	2.17512	4.55947	1.05922	8.00405	590.345	705.827	511.801	512.664	517.801	0.253423	0.883294	-1.46718	0.334168	-1.80135	PUM2	-	-
chr17:80079702-80079752:mpeak_39128|chr17_80059742_80170689_CCDC57_NM_-|	118.977	-3.4879	1.68141	-2.07439	0.0380434	0.345481	0	0	0	0	6.77266	177.547	231.651	240.512	226.674	306.617	0	0.875243	-Inf	-0.334205	-Inf	CCDC57	-	-
chr6:152240912-152240970:mpeak_74529|chr6_152011630_152419866_ESR1_NM_+|	1230.51	-1.4302	0.497723	-2.87348	0.00405977	0.184529	11.0967	10.8756	15.9582	18.0068	9.85114	3779.54	3386.67	1805.55	1639.68	1627.9	0.30661	0.86369	-0.410812	1.08329	-1.49411	ESR1	-	-
chr15:25659036-25659086:mpeak_27768|chr15_25584404_25684175_UBE3A_NM_-|	185.085	-3.99011	1.5448	-2.58293	0.00979648	0.209975	0	0	3.4196	1.05922	5.54127	317.366	356.72	370.457	426.867	369.418	0	0.85881	-Inf	-0.206519	-Inf	UBE3A	-	-
chr5:151126307-151126364:mpeak_69431|chr5_151122520_151138210_ATOX1_NM_-|	305.888	-2.54384	1.13449	-2.24228	0.0249435	0.290619	0	2.17512	5.69934	2.11845	5.54127	770.111	692.776	572.214	497.835	510.412	0.148687	0.845263	-2.03369	0.473436	-2.50712	ATOX1	-	-
chr17:59417234-59417589:mpeak_37898|chr17_58755171_59469337_BCAS3_NM_+|	643.654	-2.43162	1.18067	-2.05953	0.0394433	0.351798	4.43868	0	18.2379	0	10.4668	1592.38	1312.69	1112.51	1170.44	1215.38	0.152791	0.820525	-2.10812	0.316862	-2.42499	BCAS3	-	-
chr3:170009566-170009616:mpeak_60756|chr3_169940219_170020827_PRKCI_NM_+|	120.381	-3.50057	1.72638	-2.02769	0.0425919	0.363741	0	0	0	0	6.15696	284.076	160.959	307.764	240.444	204.411	0	0.818071	-Inf	-0.17304	-Inf	PRKCI	-	-
chr3:172084729-172084779:mpeak_60820|chr3_171757417_172114953_FNDC3B_NM_+|	156.78	-4.3677	1.64754	-2.65104	0.00802435	0.203115	0	0	0	0	6.15696	383.946	413.273	299.785	262.688	201.948	0	0.805441	-Inf	0.645571	-Inf	FNDC3B	-	-
chr1:154577860-154577977:mpeak_5743|chr1_154557519_154600456_ADAR_NM_-|	680.612	-2.78664	0.931	-2.99317	0.00276093	0.172375	3.32901	0	9.11895	9.53301	12.3139	1322.73	1499.75	1198	1486.09	1265.26	0.117947	0.784076	-2.63255	0.100308	-2.73286	ADAR	-	-
chr11:68360991-68361071:mpeak_15311|chr11_68228185_68380533_PPP6R3_NM_+|	371.101	-3.3539	1.58133	-2.12094	0.0339269	0.329792	0	1.08756	10.2588	4.2369	1.84709	634.731	961.404	600.711	716.035	780.703	0.0681371	0.779175	-3.32452	0.19091	-3.51543	PPP6R3	-	-
chr7:150814230-150814279:mpeak_78973|chr7_150782917_150840823_AGAP3_NM_+|	224.233	-4.09055	1.56143	-2.61975	0.00879953	0.206155	0	0	4.55947	2.11845	3.69418	399.481	488.315	362.478	521.138	460.541	0	0.771643	-Inf	-0.0134387	-Inf	AGAP3	-	-
chr9:134353297-134353350:mpeak_85989|chr9_134305476_134371126_PRRC2B_NM_+|	513.457	-1.79063	0.77626	-2.30674	0.0210692	0.271381	5.54835	0	3.4196	8.47379	8.61975	1219.53	1176.74	903.916	927.88	880.446	0.231541	0.756317	-1.30145	0.406267	-1.70772	PRRC2B	-	-
chr20:18609325-18609375:mpeak_51746|chr20_18568555_18744003_DTD1_NM_+|	139.486	-3.57791	1.59594	-2.24188	0.0249688	0.290619	0	0	0	1.05922	5.54127	260.773	250.139	286.107	248.918	342.327	0	0.75232	-Inf	-0.195119	-Inf	DTD1	-	-
chr20:32885115-32885168:mpeak_52070|chr20_32868971_32899608_AHCY_NM_-|	177.412	-4.05098	1.61114	-2.51436	0.011925	0.220256	0	0	0	1.05922	6.77266	332.901	387.172	418.332	311.412	316.468	0	0.748595	-Inf	0.046003	-Inf	AHCY	-	-
chr6:87873379-87873510:mpeak_72950|chr6_87865268_87964367_ZNF292_NM_+|	173.577	-4.20948	1.61069	-2.61347	0.00896289	0.206155	0	0	1.13987	0	5.54127	402.81	419.799	230.253	328.359	347.868	0	0.737041	-Inf	0.444892	-Inf	ZNF292	-	-
chr8:126105729-126105779:mpeak_82252|chr8_126104082_126379009_NSMCE2_NM_+|	237.966	-3.9113	1.62403	-2.4084	0.0160227	0.245477	0	0	4.55947	2.11845	4.30987	261.882	572.057	385.275	583.632	565.825	0	0.715942	-Inf	-0.295011	-Inf	NSMCE2	-	-
chr1:46077956-46078006:mpeak_2301|chr1_46049659_46083732_NASP_NM_+|	133.174	-3.36222	1.68945	-1.99013	0.0465766	0.3774	0	0	0	0	6.15696	176.438	282.766	238.232	313.53	314.621	0	0.710651	-Inf	-0.33091	-Inf	NASP	-	-
chr6:152156524-152156578:mpeak_74502|chr6_152011630_152419866_ESR1_NM_+|	1228.03	-3.22196	0.742843	-4.33734	1.44216e-05	0.0324017	2.21934	3.26268	10.2588	11.6515	13.5453	3779.54	3386.67	1805.55	1639.68	1627.9	0.0764983	0.69889	-2.10827	1.08329	-3.19157	ESR1	-	-
chr20:55049722-55049815:mpeak_53190|chr20_55043640_55093142_RTFDC1_NM_+|	560.308	-2.93593	1.11711	-2.62815	0.00858496	0.203347	2.21934	0	5.69934	6.35534	11.0825	1156.28	1106.05	964.329	1240.35	1110.72	0.0980999	0.697872	-2.79705	0.0335883	-2.83064	RTFDC1	-	-
chr1:160308642-160308693:mpeak_6145|chr1_160260006_160313354_COPA_NM_-|	280.862	-4.24469	1.59761	-2.6569	0.00788633	0.203115	0	0	9.11895	0	1.84709	656.925	563.357	458.227	618.587	500.561	0	0.695208	-Inf	0.214651	-Inf	COPA	-	-
chr10:82250063-82250115:mpeak_11241|chr10_82214037_82277660_TSPAN14_NM_+|	312.041	-4.53646	1.5217	-2.98117	0.00287145	0.175849	0	0	2.27974	5.29612	4.92557	655.815	647.099	613.249	577.277	614.465	0	0.692603	-Inf	0.114713	-Inf	TSPAN14	-	-
chr7:5541660-5541728:mpeak_75254|chr7_5521562_5553399_FBXL18_NM_-|	249.702	-4.0555	1.55611	-2.60618	0.0091559	0.206791	0	0	5.69934	0	4.92557	538.19	395.872	502.682	515.842	533.809	0	0.684448	-Inf	-0.147884	-Inf	FBXL18	-	-
chr1:161076257-161076474:mpeak_6190|chr1_161070649_161087866_PFDN2_NM_-|	272.44	-4.11128	1.54517	-2.66073	0.00779716	0.203115	0	0	0	6.35534	5.54127	432.771	523.117	532.318	581.514	642.787	0	0.677245	-Inf	-0.292925	-Inf	PFDN2	-	-
chr16:8938054-8938108:mpeak_31268|chr16_8891669_8941580_PMM2_NM_+|	231.2	-4.28819	1.59481	-2.68885	0.00716996	0.203115	0	0	1.13987	3.17767	3.69418	539.3	565.532	295.226	522.197	381.732	0	0.668114	-Inf	0.466771	-Inf	PMM2	-	-
chr4:24537294-24537344:mpeak_62433|chr4_24529664_24586184_DHX15_NM_-|	220.158	-4.06027	1.55238	-2.61551	0.00890944	0.206155	0	0	0	4.2369	4.30987	421.675	491.578	396.674	453.348	429.756	0	0.667832	-Inf	0.0981544	-Inf	DHX15	-	-
chr4:166302900-166302951:mpeak_65197|chr4_166300096_166418663_CPE_NM_+|	237.044	-3.98221	1.58748	-2.50851	0.0121241	0.220256	0	0	5.69934	0	3.69418	508.229	439.375	429.73	599.521	384.194	0	0.664583	-Inf	0.00810199	-Inf	CPE	-	-
chr3:128892580-128892641:mpeak_59504|chr3_128889413_128902810_CNBP_NM_-|	439.914	-2.28978	1.13917	-2.01004	0.0444272	0.369011	1.10967	1.08756	7.97908	5.29612	4.30987	806.73	903.763	777.39	836.787	1054.69	0.128456	0.658897	-2.41563	-0.0568509	-2.35878	CNBP	-	-
chr8:59474129-59474179:mpeak_80480|chr8_59465727_59494244_SDCBP_NM_+|	211.188	-3.84418	1.57179	-2.44573	0.0144558	0.230879	0	0	4.55947	0	3.69418	383.946	462.213	360.198	479.828	417.442	0	0.65637	-Inf	0.0134412	-Inf	SDCBP	-	-
chr6:91238686-91238736:mpeak_73115|chr6_91226400_91297020_MAP3K7_NM_-|	182.597	-3.60121	1.63049	-2.20867	0.0271977	0.301856	0	0	0	1.05922	6.77266	267.431	345.844	315.744	461.822	427.293	0	0.650025	-Inf	-0.389295	-Inf	MAP3K7	-	-
chr8:141560894-141560945:mpeak_82482|chr8_141542251_141645646_AGO2_NM_-|	257.018	-4.16767	1.55251	-2.68446	0.00726464	0.203115	0	0	5.69934	0	3.69418	515.997	590.546	467.346	530.671	456.231	0	0.645936	-Inf	0.190748	-Inf	AGO2	-	-
chr12:133404615-133404780:mpeak_22257|chr12_133349880_133405426_GOLGA3_NM_-|	492.819	-3.32327	1.5565	-2.13509	0.0327534	0.325455	1.10967	0	11.3987	5.29612	2.46279	810.059	1089.74	864.02	1066.64	1077.47	0.05841	0.636861	-3.52475	-0.0780588	-3.44669	GOLGA3	-	-
chr1:185089512-185089562:mpeak_7057|chr1_185089403_185126230_TRMT1L_NM_-|	262.001	-4.08478	1.56301	-2.61341	0.0089644	0.206155	0	0	4.55947	0	4.92557	461.623	584.02	490.143	596.343	478.396	0	0.606119	-Inf	0.00329889	-Inf	TRMT1L	-	-
chr7:142986558-142986623:mpeak_78766|chr7_142985307_143002032_CASP2_NM_+|	184.691	-3.51615	1.58728	-2.21521	0.0267454	0.3006	0	0	1.13987	1.05922	4.92557	278.527	374.121	339.681	396.15	451.305	0	0.600156	-Inf	-0.278145	-Inf	CASP2	-	-
chr14:91944301-91944355:mpeak_26960|chr14_91925213_91976824_SMEK1_NM_-|	166.955	-3.54564	1.63052	-2.17455	0.0296641	0.312282	0	0	0	0	6.15696	262.992	351.282	328.282	383.439	337.402	0	0.586868	-Inf	-0.187266	-Inf	SMEK1	-	-
chr18:12481954-12482059:mpeak_39511|chr18_12449895_12657912_SPIRE1_NM_-|	198.667	-4.15964	1.61071	-2.58249	0.00980899	0.209975	0	0	0	0	6.15696	447.197	483.965	363.618	303.997	381.732	0	0.586742	-Inf	0.412575	-Inf	SPIRE1	-	-
chr4:40830213-40830263:mpeak_62785|chr4_40818276_41216635_APBB2_NM_-|	179.54	-3.73074	1.64785	-2.264	0.0235739	0.28545	0	0	0	0	6.15696	329.572	389.347	408.073	281.754	380.5	0	0.575241	-Inf	0.0108124	-Inf	APBB2	-	-
chr2:112841544-112841603:mpeak_47890|chr2_112812799_112873660_TMEM87B_NM_+|	256.164	-4.01847	1.56014	-2.57572	0.0100033	0.21109	0	0	1.13987	3.17767	4.30987	487.145	559.006	422.891	569.862	514.106	0	0.572543	-Inf	0.0585092	-Inf	TMEM87B	-	-
chr9:123371440-123371494:mpeak_85253|chr9_123367919_123476765_MEGF9_NM_-|	276.327	-4.07528	1.59462	-2.55564	0.0105992	0.215362	0	0	0	6.35534	2.46279	658.035	548.131	582.473	387.676	578.139	0	0.569541	-Inf	0.224717	-Inf	MEGF9	-	-
chr16:84090609-84090659:mpeak_33872|chr16_84088250_84150548_MBTPS1_NM_-|	324.127	-4.1109	1.60534	-2.56076	0.0104444	0.214468	0	0	9.11895	0	1.23139	673.57	730.841	543.717	706.502	576.292	0	0.566673	-Inf	0.205837	-Inf	MBTPS1	-	-
chr2:73117242-73117292:mpeak_46766|chr2_73114511_73118475_SPR_NM_+|	212.247	-4.05786	1.61113	-2.51864	0.0117809	0.220256	0	0	0	0	6.77266	423.894	488.315	394.394	416.275	392.814	0	0.562755	-Inf	0.185182	-Inf	SPR	-	-
chr6:152386191-152386360:mpeak_74553|chr6_152011630_152419866_ESR1_NM_+|	1228.48	-1.19407	0.567495	-2.10411	0.0353689	0.335549	6.65802	10.8756	13.6784	3.17767	11.0825	3779.54	3386.67	1805.55	1639.68	1627.9	0.244671	0.550718	-0.0871735	1.08329	-1.17047	ESR1	-	-
chr20:47347612-47347832:mpeak_52774|chr20_47242465_47444420_PREX1_NM_-|	735.693	-5.66822	1.52054	-3.72776	0.000193191	0.0655727	0	0	11.3987	2.11845	4.92557	1882	2070.72	1117.07	1080.41	1188.29	0	0.544712	-Inf	0.808322	-Inf	PREX1	-	-
chr17:34143255-34143305:mpeak_36160|chr17_34136458_34173909_TAF15_NM_+|	233.358	-4.04144	1.62633	-2.485	0.0129553	0.224247	0	0	0	0	7.38836	466.062	490.49	447.968	466.058	455.615	0	0.539437	-Inf	0.0670784	-Inf	TAF15	-	-
chr12:56196745-56196813:mpeak_19208|chr12_56146624_56211540_SARNP_NR_-mpeak_19208|chr12_56151337_56211540_SARNP_NM_-||	240.039	-3.50411	1.57853	-2.21985	0.0264288	0.298908	0	0	3.4196	1.05922	3.69418	392.823	438.287	435.43	650.363	475.318	0	0.523538	-Inf	-0.324498	-Inf	SARNP	-	-
chr6:152157189-152157284:mpeak_74503|chr6_152011630_152419866_ESR1_NM_+|	1227.14	-2.75255	0.771766	-3.56656	0.000361703	0.0797297	2.21934	3.26268	13.6784	4.2369	8.61975	3779.54	3386.67	1805.55	1639.68	1627.9	0.0764983	0.523051	-1.69016	1.08329	-2.77345	ESR1	-	-
chr2:10524879-10524935:mpeak_44851|chr2_10443029_10566849_HPCAL1_NM_+|	403.143	-4.05292	1.55502	-2.60634	0.00915147	0.206791	0	0	6.83921	5.29612	1.23139	694.654	766.731	763.712	988.256	804.715	0	0.522815	-Inf	-0.221975	-Inf	HPCAL1	-	-
chr1:61579625-61579781:mpeak_2709|chr1_61542945_61920974_NFIA_NM_+|	283.924	-3.60077	1.58286	-2.27485	0.0229147	0.282859	0	0	5.69934	0	4.30987	375.069	536.168	557.396	595.284	765.31	0	0.52186	-Inf	-0.488736	-Inf	NFIA	-	-
chr3:48974503-48974561:mpeak_57632|chr3_48956280_49020631_ARIH2_NM_+|	294.528	-3.85725	1.5621	-2.46928	0.0135386	0.226979	0	0	0	6.35534	3.07848	496.023	618.822	538.018	659.896	623.085	0	0.518058	-Inf	-0.122925	-Inf	ARIH2	-	-
chr7:77549729-77549788:mpeak_77021|chr7_77428108_77584174_PHTF2_NM_+|	206.041	-3.42615	1.64576	-2.0818	0.0373606	0.343139	0	0	0	0	6.77266	382.836	300.167	400.094	506.309	464.235	0	0.494125	-Inf	-0.419921	-Inf	PHTF2	-	-
chr12:51778045-51778110:mpeak_18856|chr12_51748276_51785200_GALNT6_NM_-|	861.588	-1.93322	0.855031	-2.26099	0.02376	0.286739	2.21934	2.17512	11.3987	6.35534	6.77266	1972.99	1580.23	1490.95	1863.17	1679.62	0.123676	0.487246	-1.89563	0.0824584	-1.97809	GALNT6	-	-
chr2:54130662-54130774:mpeak_46139|chr2_54092710_54197977_PSME4_NM_-|	330.989	-4.24571	1.61391	-2.63071	0.00852078	0.203161	0	0	1.13987	1.05922	7.38836	655.815	676.463	523.2	861.149	583.68	0	0.48716	-Inf	0.0221067	-Inf	PSME4	-	-
chr16:73081042-73081092:mpeak_33565|chr16_72822747_73092534_ZFHX3_NM_-|	426.798	-4.97745	1.54724	-3.21699	0.00129542	0.126212	0	0	2.27974	1.05922	6.15696	1257.26	1025.57	695.32	634.475	645.865	0	0.480646	-Inf	0.793449	-Inf	ZFHX3	-	-
chr16:68228723-68228773:mpeak_33123|chr16_68119268_68260252_NFATC3_NM_+|	232.357	-3.97227	1.60547	-2.47421	0.0133531	0.226932	0	0	0	0	6.15696	457.184	555.744	437.709	462.881	403.897	0	0.471983	-Inf	0.220011	-Inf	NFATC3	-	-
chr2:151331506-151331579:mpeak_48711|chr2_151326752_151344209_RND3_NM_-|	534.683	-4.35183	1.82768	-2.38107	0.0172625	0.250607	0	0	14.8183	0	1.23139	989.826	900.501	1285.77	997.789	1156.89	0	0.466499	-Inf	-0.279001	-Inf	RND3	-	-
chr8:20073429-20073482:mpeak_79609|chr8_20054703_20077773_ATP6V1B2_NM_+|	320.851	-3.92279	1.59072	-2.46605	0.0136614	0.226979	0	0	0	5.29612	3.69418	482.707	775.431	553.976	691.673	695.737	0	0.463087	-Inf	-0.0408347	-Inf	ATP6V1B2	-	-
chr9:116118957-116119007:mpeak_85132|chr9_116111811_116131895_BSPRY_NM_+|	349.955	-4.1077	1.54027	-2.66688	0.00765601	0.203115	0	0	4.55947	0	4.92557	670.241	736.279	720.397	670.489	692.658	0	0.455236	-Inf	0.0180529	-Inf	BSPRY	-	-
chr16:24761901-24761962:mpeak_32033|chr16_24741048_24834752_TNRC6A_NM_+mpeak_32033|chr16_24741048_24834752_TNRC6A_NM_+||	455.39	-3.23613	1.59701	-2.02637	0.042727	0.363936	1.10967	0	6.83921	0	3.07848	875.53	1476.91	632.627	798.655	759.154	0.0471711	0.452773	-2.57491	0.687902	-3.26281	TNRC6A	-	-
chr19:38866076-38866129:mpeak_42860|chr19_38865189_38873892_PSMD8_NM_+|	918.264	-1.82656	0.85155	-2.14498	0.0319544	0.321249	3.32901	1.08756	12.5386	7.41457	4.30987	1904.19	1854.29	1777.05	1932.02	1686.39	0.117509	0.449692	-1.8728	0.0633652	-1.93616	PSMD8	-	-
chr13:20280045-20280133:mpeak_22341|chr13_20249793_20357159_PSPC1_NR_-mpeak_22341|chr13_20277500_20357159_PSPC1_NM_-||	528.635	-4.93577	1.54072	-3.20354	0.00135748	0.126212	0	0	2.27974	5.29612	3.69418	1512.48	1241.99	928.993	757.345	834.268	0	0.447116	-Inf	0.712969	-Inf	PSPC1	-	-
chr14:95598258-95598308:mpeak_27162|chr14_95557000_95624347_DICER1_NM_-|	338.85	-4.28259	1.55024	-2.76254	0.00573538	0.197682	0	0	0	2.11845	6.15696	715.737	761.293	673.662	617.527	612.002	0	0.434817	-Inf	0.219241	-Inf	DICER1	-	-
chr11:68311241-68311291:mpeak_15300|chr11_68228185_68380533_PPP6R3_NM_+|	370.248	-4.32055	1.60468	-2.69247	0.00709253	0.203115	0	0	0	2.11845	6.77266	634.731	961.404	600.711	716.035	780.703	0	0.423901	-Inf	0.19091	-Inf	PPP6R3	-	-
chr2:102469675-102469727:mpeak_47618|chr2_102314164_102507627_MAP4K4_NM_+|	340.255	-4.28372	1.69375	-2.52914	0.0114342	0.220256	0	0	0	0	8.00405	774.55	727.578	582.473	550.796	759.154	0	0.422953	-Inf	0.251736	-Inf	MAP4K4	-	-
chr22:28262762-28262812:mpeak_55142|chr22_28249651_28315294_PITPNB_NM_-|	370.342	-3.85348	1.58632	-2.42919	0.0151327	0.237226	0	0	3.4196	3.17767	3.07848	502.681	895.063	704.439	742.516	849.045	0	0.421418	-Inf	-0.13106	-Inf	PITPNB	-	-
chr13:20289561-20289615:mpeak_22343|chr13_20249793_20357159_PSPC1_NR_-mpeak_22343|chr13_20277500_20357159_PSPC1_NM_-||	528.786	-2.56464	1.1592	-2.21242	0.0269378	0.301227	2.21934	0	2.27974	2.11845	6.15696	1512.48	1241.99	928.993	757.345	834.268	0.0805722	0.418754	-1.66478	0.712969	-2.37775	PSPC1	-	-
chr11:65896543-65896593:mpeak_15049|chr11_65837823_66010635_PACS1_NM_+|	316.838	-3.71441	1.59619	-2.32705	0.0199625	0.265569	0	0	3.4196	1.05922	3.69418	717.957	488.315	615.529	811.365	527.036	0	0.418285	-Inf	-0.110862	-Inf	PACS1	-	-
chr17:1572173-1572225:mpeak_34503|chr17_1554250_1588176_PRPF8_NM_-|	385.77	-4.23469	1.55348	-2.72594	0.00641193	0.200035	0	0	3.4196	1.05922	4.30987	782.318	933.127	628.067	776.411	728.984	0	0.411945	-Inf	0.270348	-Inf	PRPF8	-	-
chr5:138205318-138205368:mpeak_68856|chr5_138089084_138269490_CTNNA1_NM_+|	250.526	-3.70456	1.64086	-2.25769	0.0239648	0.28721	0	0	0	0	6.15696	415.017	576.407	429.73	534.908	543.044	0	0.408373	-Inf	-0.0197959	-Inf	CTNNA1	-	-
chr6:152299033-152299161:mpeak_74539|chr6_152011630_152419866_ESR1_NM_+|	1226.42	-2.78465	0.850946	-3.27242	0.00106632	0.123021	3.32901	1.08756	9.11895	2.11845	9.23544	3779.54	3386.67	1805.55	1639.68	1627.9	0.0616306	0.403554	-1.62775	1.08329	-2.71104	ESR1	-	-
chr3:101298981-101299031:mpeak_58695|chr3_101293041_101311470_PCNP_NM_+|	266.24	-3.90496	1.58702	-2.46056	0.0138721	0.227581	0	0	0	0	6.15696	563.713	560.094	486.724	547.619	498.098	0	0.401775	-Inf	0.137525	-Inf	PCNP	-	-
chr10:98314998-98315145:mpeak_11727|chr10_98282087_98346809_TM9SF3_NM_-|	1038.11	-2.43382	0.953188	-2.55334	0.0106695	0.215362	2.21934	1.08756	6.83921	11.6515	3.69418	2290.36	2516.62	1728.04	1926.73	1893.88	0.0687938	0.399824	-2.16106	0.377955	-2.53902	TM9SF3	-	-
chr3:128893594-128893645:mpeak_59505|chr3_128889413_128902810_CNBP_NM_-|	438.948	-4.26858	1.59213	-2.68105	0.00733913	0.203115	0	0	0	2.11845	8.00405	806.73	903.763	777.39	836.787	1054.69	0	0.379281	-Inf	-0.0568509	-Inf	CNBP	-	-
chr11:65918404-65918454:mpeak_15050|chr11_65837823_66010635_PACS1_NM_+|	316.759	-3.80277	1.71949	-2.21157	0.0269964	0.301227	0	0	0	0	7.38836	717.957	488.315	615.529	811.365	527.036	0	0.378128	-Inf	-0.110862	-Inf	PACS1	-	-
chr7:127508039-127508089:mpeak_78225|chr7_127292201_127732044_SND1_NM_+|	280.556	-3.83865	1.62822	-2.35757	0.018395	0.25696	0	0	0	0	6.15696	591.454	577.495	446.828	646.127	537.503	0	0.377622	-Inf	0.104898	-Inf	SND1	-	-
chr18:9107726-9107800:mpeak_39383|chr18_9102627_9134183_NDUFV2_NM_+|	471.075	-4.30467	1.56303	-2.75406	0.00588609	0.19874	0	0	4.55947	1.05922	4.30987	878.859	1170.22	746.614	892.926	1012.2	0	0.374417	-Inf	0.212994	-Inf	NDUFV2	-	-
chr6:152131735-152131800:mpeak_74490|chr6_152011630_152419866_ESR1_NM_+|	1226.71	-1.71989	0.676849	-2.54103	0.0110527	0.219046	4.43868	4.35024	2.27974	7.41457	9.23544	3779.54	3386.67	1805.55	1639.68	1627.9	0.122644	0.373137	-0.521934	1.08329	-1.60523	ESR1	-	-
chr2:99979879-99979930:mpeak_47519|chr2_99953833_100015769_EIF5B_NM_+|	308.311	-3.83598	1.7616	-2.17755	0.0294395	0.310827	0	0	0	0	6.77266	426.113	834.159	438.849	693.792	683.423	0	0.372931	-Inf	0.0578837	-Inf	EIF5B	-	-
chr10:82266118-82266168:mpeak_11242|chr10_82214037_82277660_TSPAN14_NM_+|	311.451	-3.9162	1.5597	-2.51088	0.0120432	0.220256	0	0	0	1.05922	5.54127	655.815	647.099	613.249	577.277	614.465	0	0.36568	-Inf	0.114713	-Inf	TSPAN14	-	-
chr7:80499707-80499787:mpeak_77056|chr7_80374623_80548667_SEMA3C_NM_-|	473.334	-3.81383	1.52942	-2.49365	0.0126438	0.222059	0	0	5.69934	0	6.15696	734.602	712.352	1065.78	1066.64	1142.12	0	0.362076	-Inf	-0.593307	-Inf	SEMA3C	-	-
chr12:112862089-112862210:mpeak_21261|chr12_112856535_112943628_PTPN11_NM_+|	637.88	-3.15677	1.52936	-2.06411	0.0390072	0.34964	1.10967	0	3.4196	3.17767	6.77266	1366	1198.49	1469.29	1154.55	1175.98	0.0432705	0.351857	-3.00583	0.0177055	-3.02353	PTPN11	-	-
chr20:52194870-52195064:mpeak_53082|chr20_52185803_52199636_ZNF217_NM_-|	483.636	-4.1228	1.56075	-2.64155	0.00825287	0.203115	0	0	3.4196	1.05922	6.15696	752.357	1047.32	980.287	1137.61	908.152	0	0.351475	-Inf	-0.164732	-Inf	ZNF217	-	-
chr2:68460172-68460229:mpeak_46552|chr2_68408142_68479651_PPP3R1_NM_-|	653.513	-3.01074	1.53437	-1.9622	0.0497396	0.389868	1.10967	0	3.4196	2.11845	9.23544	1016.46	1240.91	1306.29	1513.63	1441.96	0.0491578	0.346643	-3.14985	-0.331888	-2.81796	PPP3R1	-	-
chr19:18683513-18683626:mpeak_41998|chr19_18682613_18685866_UBA52_NM_+|	1746.34	-1.70695	0.703219	-2.42734	0.0152098	0.237744	3.32901	4.35024	15.9582	7.41457	10.4668	4226.73	3257.25	3263.44	3683.98	2990.44	0.102609	0.340512	-1.55471	0.175833	-1.73054	UBA52	-	-
chr7:157130776-157130826:mpeak_79206|chr7_157129709_157208709_DNAJB6_NM_+|	358.713	-3.38718	1.5661	-2.16281	0.0305555	0.316676	0	0	2.27974	2.11845	3.69418	550.397	627.523	678.222	945.887	777.009	0	0.337025	-Inf	-0.442503	-Inf	DNAJB6	-	-
chr12:1880503-1880668:mpeak_17168|chr12_1800246_1895109_ADIPOR2_NM_+|	810.819	-2.46801	1.16457	-2.11925	0.0340695	0.330327	0	2.17512	5.69934	1.05922	9.23544	1521.36	1787.95	1362.14	1604.72	1813.84	0.0657274	0.334553	-2.2934	0.054268	-2.34767	ADIPOR2	-	-
chr8:95663336-95663440:mpeak_81264|chr8_95653363_95718152_ESRP1_NM_+|	435.873	-3.66796	1.55849	-2.35354	0.0185955	0.258162	0	0	4.55947	1.05922	3.69418	661.364	862.436	858.321	911.992	1055.3	0	0.329587	-Inf	-0.30593	-Inf	ESRP1	-	-
chr1:46537609-46537659:mpeak_2343|chr1_46509543_46642167_PIK3R3_NM_-|	495.763	-4.29338	1.57684	-2.72278	0.00647354	0.200346	0	0	0	3.17767	5.54127	989.826	1187.62	791.069	1134.43	845.967	0	0.314597	-Inf	0.236949	-Inf	PIK3R3	-	-
chr6:152147295-152147347:mpeak_74500|chr6_152011630_152419866_ESR1_NM_+|	1225.98	-1.79502	0.871916	-2.05871	0.0395224	0.352212	4.43868	1.08756	11.3987	1.05922	2.46279	3779.54	3386.67	1805.55	1639.68	1627.9	0.0771154	0.294112	-0.847981	1.08329	-1.93128	ESR1	-	-
chr1:114946332-114946391:mpeak_4263|chr1_114940482_115053781_TRIM33_NM_-|	617.038	-3.8541	1.6194	-2.37995	0.017315	0.250691	0	0	6.83921	4.2369	0	972.071	1394.25	1087.43	1267.89	1437.65	0	0.292016	-Inf	-0.0957198	-Inf	TRIM33	-	-
chr17:7792111-7792321:mpeak_35031|chr17_7788122_7814781_CHD3_NM_+|	691.236	-4.23968	1.5929	-2.66161	0.00777679	0.203115	0	0	3.4196	7.41457	0.615696	1703.34	1273.53	1235.62	1547.53	1140.89	0	0.291789	-Inf	0.186427	-Inf	CHD3	-	-
chr3:186296612-186296665:mpeak_61260|chr3_186288464_186303132_DNAJB11_NM_+|	582.889	-3.85553	1.56495	-2.46367	0.0137522	0.226979	0	0	3.4196	5.29612	1.84709	1008.69	1172.39	995.105	1445.84	1196.3	0	0.290407	-Inf	-0.152839	-Inf	DNAJB11	-	-
chr2:27611865-27611918:mpeak_45388|chr2_27604672_27632550_PPM1G_NM_-|	705.014	-4.36074	1.54729	-2.81831	0.00482766	0.194565	0	0	3.4196	2.11845	7.38836	1098.57	1482.35	1310.85	1527.4	1618.05	0	0.29007	-Inf	-0.202998	-Inf	PPM1G	-	-
chr9:84231695-84231745:mpeak_84002|chr9_84199220_84304450_TLE1_NM_-|	411.137	-3.79507	1.64274	-2.3102	0.0208768	0.270697	0	0	0	0	7.38836	766.782	762.38	817.286	990.374	767.158	0	0.286947	-Inf	-0.166766	-Inf	TLE1	-	-
chr4:99823050-99823186:mpeak_63861|chr4_99802293_99851786_EIF4E_NM_-|	344.707	-3.51333	1.63127	-2.15373	0.0312612	0.31824	0	0	0	0	6.15696	585.906	667.762	588.172	851.616	747.455	0	0.281494	-Inf	-0.217995	-Inf	EIF4E	-	-
chr6:152299615-152299668:mpeak_74540|chr6_152011630_152419866_ESR1_NM_+|	1225.89	-1.76219	0.808846	-2.17865	0.0293579	0.310604	4.43868	1.08756	4.55947	6.35534	3.07848	3779.54	3386.67	1805.55	1639.68	1627.9	0.0771154	0.275832	-0.755403	1.08329	-1.8387	ESR1	-	-
chr16:74688194-74688295:mpeak_33619|chr16_74657969_74700779_RFWD3_NM_-|	454.644	-3.56321	1.54603	-2.30475	0.0211808	0.271381	0	0	0	4.2369	3.69418	815.608	800.445	933.552	979.782	1009.13	0	0.271383	-Inf	-0.269747	-Inf	RFWD3	-	-
chr1:174971576-174971626:mpeak_6673|chr1_174968570_174979058_CACYBP_NM_+|	587.242	-4.03589	1.63835	-2.4634	0.0137628	0.226979	0	0	1.13987	0	9.23544	982.058	1052.76	1185.46	1414.06	1227.7	0	0.271092	-Inf	-0.326437	-Inf	CACYBP	-	-
chr3:9508833-9509046:mpeak_56324|chr3_9439383_9517166_SETD5_NM_+|	1825.57	-1.5174	0.76909	-1.97298	0.0484973	0.38572	2.21934	4.35024	14.8183	6.35534	6.15696	3403.36	4265.41	3027.49	3894.77	3630.76	0.0856667	0.258984	-1.47168	0.124375	-1.59605	SETD5	-	-
chr3:47762533-47762583:mpeak_57545|chr3_47629796_47823405_SMARCC1_NM_-|	412.118	-3.83314	1.61318	-2.37615	0.0174946	0.25161	0	0	0	0	6.15696	725.724	980.98	764.852	794.418	849.045	0	0.255654	-Inf	0.0881519	-Inf	SMARCC1	-	-
chr20:46374282-46374332:mpeak_52731|chr20_46287136_46415360_SULF2_NM_-|	409.216	-3.75583	1.5823	-2.37366	0.0176129	0.252102	0	0	0	0	6.15696	784.537	839.597	808.167	780.648	873.057	0	0.250093	-Inf	-0.0151224	-Inf	SULF2	-	-
chr15:63635053-63635116:mpeak_29204|chr15_63618556_63674309_CA12_NM_-|	683.633	-4.10019	1.55087	-2.64381	0.00819792	0.203115	0	0	5.69934	0	3.69418	1586.83	1285.5	1299.45	1396.06	1259.1	0	0.237534	-Inf	0.123648	-Inf	CA12	-	-
chr15:63655027-63655080:mpeak_29207|chr15_63618556_63674309_CA12_NM_-|	683.633	-4.10019	1.55087	-2.64381	0.00819792	0.203115	0	0	5.69934	0	3.69418	1586.83	1285.5	1299.45	1396.06	1259.1	0	0.237534	-Inf	0.123648	-Inf	CA12	-	-
chr20:30153068-30153119:mpeak_51922|chr20_30102212_30156922_HM13_NM_+|	752.443	-4.22721	1.58056	-2.67449	0.00748422	0.203115	0	0	0	6.35534	3.69418	1870.9	1298.55	1351.88	1733.95	1259.1	0	0.231293	-Inf	0.129862	-Inf	HM13	-	-
chr12:51754083-51754204:mpeak_18853|chr12_51748276_51785200_GALNT6_NM_-|	859.859	-4.31439	1.54948	-2.7844	0.00536262	0.197157	0	0	1.13987	7.41457	3.07848	1972.99	1580.23	1490.95	1863.17	1679.62	0	0.231099	-Inf	0.0824584	-Inf	GALNT6	-	-
chr5:10419030-10419099:mpeak_65851|chr5_10353750_10433705_MARCH6_NM_+|	695.917	-4.13569	1.57298	-2.62921	0.00855829	0.203161	0	0	5.69934	0	3.07848	1425.93	1697.68	1037.28	1406.65	1382.85	0	0.229379	-Inf	0.292044	-Inf	MARCH6	-	-
chr3:41267995-41268055:mpeak_57287|chr3_41240941_41280624_CTNNB1_NM_+|	516.094	-3.76514	1.64251	-2.29231	0.0218875	0.277473	0	0	1.13987	0	6.15696	734.602	1236.56	884.538	1241.41	1056.53	0	0.229281	-Inf	-0.106146	-Inf	CTNNB1	-	-
chr16:89953303-89953355:mpeak_34328|chr16_89939993_89977487_TCF25_NM_+|	816.958	-4.52283	1.53619	-2.94418	0.00323806	0.179565	0	0	2.27974	2.11845	5.54127	1954.13	1757.5	1394.06	1620.61	1433.34	0	0.223458	-Inf	0.323854	-Inf	TCF25	-	-
chr6:152270026-152270084:mpeak_74533|chr6_152011630_152419866_ESR1_NM_+|	1225.39	-2.07396	1.00964	-2.05415	0.0399609	0.353729	0	3.26268	7.97908	2.11845	1.23139	3779.54	3386.67	1805.55	1639.68	1627.9	0.0455288	0.223312	-1.21092	1.08329	-2.29421	ESR1	-	-
chr3:63830374-63830430:mpeak_58143|chr3_63819875_63849599_THOC7_NM_-|	766.723	-3.94354	1.54481	-2.55277	0.0106871	0.215362	0	0	5.69934	1.05922	3.69418	1324.95	1533.46	1410.02	1741.36	1646.99	0	0.21784	-Inf	-0.16237	-Inf	THOC7	-	-
chr1:164743032-164743082:mpeak_6337|chr1_164528596_164815820_PBX1_NM_+|	540.747	-3.6963	1.5803	-2.33898	0.0193363	0.261236	0	0	2.27974	0	4.92557	1108.56	959.229	1163.81	900.34	1268.33	0	0.216215	-Inf	-0.103544	-Inf	PBX1	-	-
chr20:56916047-56916097:mpeak_53271|chr20_56884770_56934661_RAB22A_NM_+|	731.22	-3.79668	1.56403	-2.4275	0.0152031	0.237744	0	0	6.83921	0	3.07848	1262.8	1429.06	1317.69	1787.97	1504.76	0	0.215115	-Inf	-0.191332	-Inf	RAB22A	-	-
chr9:96266421-96266483:mpeak_84390|chr9_96213977_96326510_FAM120A_NM_+|	5148.3	-1.42669	0.564748	-2.52625	0.0115288	0.220256	12.2064	4.35024	27.3568	15.8884	17.8552	9413.33	12403.6	9097.29	10264.9	10226.1	0.0758887	0.206502	-1.29881	0.145385	-1.4442	FAM120A	-	-
chr17:59294601-59294731:mpeak_37886|chr17_58755171_59469337_BCAS3_NM_+|	641.045	-4.12731	1.55912	-2.64721	0.00811586	0.203115	0	0	0	2.11845	4.92557	1592.38	1312.69	1112.51	1170.44	1215.38	0	0.201353	-Inf	0.316862	-Inf	BCAS3	-	-
chr1:164661950-164662000:mpeak_6332|chr1_164528596_164815820_PBX1_NM_+|	540.695	-3.67379	1.59248	-2.30696	0.0210572	0.271381	0	0	1.13987	0	5.54127	1108.56	959.229	1163.81	900.34	1268.33	0	0.200485	-Inf	-0.103544	-Inf	PBX1	-	-
chr6:152018122-152018454:mpeak_74480|chr6_152011630_152419866_ESR1_NM_+|	1224.94	-5.37276	1.5375	-3.49448	0.000474987	0.0880451	0	0	1.13987	2.11845	6.77266	3779.54	3386.67	1805.55	1639.68	1627.9	0	0.197728	-Inf	1.08329	-Inf	ESR1	-	-
chr9:86589120-86589171:mpeak_84086|chr9_86584355_86595569_HNRNPK_NM_-mpeak_84086|chr9_86584355_86595569_HNRNPK_NM_-||	1437.49	-4.74355	1.56536	-3.03032	0.00244292	0.162876	0	0	1.13987	11.6515	4.30987	2322.54	3308.36	2616	2935.11	3175.76	0	0.19596	-Inf	-0.0471358	-Inf	HNRNPK	-	-
chr17:57970619-57970697:mpeak_37711|chr17_57970406_58023911_RPS6KB1_NM_+|	1912.37	-1.74568	0.873285	-1.99898	0.0456101	0.371979	2.21934	2.17512	2.27974	7.41457	13.5453	3532.08	3426.9	4253.99	3785.67	4097.46	0.063148	0.191476	-1.81787	-0.217514	-1.60035	RPS6KB1	-	-
chr4:1746264-1746354:mpeak_61905|chr4_1723216_1746674_TACC3_NM_+|	626.934	-3.17635	1.57388	-2.01817	0.0435739	0.367207	0	0	1.13987	3.17767	3.69418	808.95	1058.2	1193.44	1641.8	1558.94	0	0.182326	-Inf	-0.649797	-Inf	TACC3	-	-
chr17:73385069-73385215:mpeak_38630|chr17_73316634_73401790_GRB2_NM_-|	876.631	-4.22177	1.54712	-2.72879	0.00635673	0.200035	0	0	4.55947	0	4.30987	2098.39	1780.34	1671.05	1686.28	1521.39	0	0.181797	-Inf	0.254043	-Inf	GRB2	-	-
chr2:198359656-198359720:mpeak_49840|chr2_198351922_198364998_HSPD1_NM_-|	2067.38	-2.17165	0.948283	-2.29008	0.0220165	0.277804	1.10967	2.17512	4.55947	10.5922	6.77266	3918.25	4440.51	3876.69	4657.41	3755.75	0.0392976	0.178394	-2.1537	0.0288561	-2.18255	HSPD1	-	-
chrX:9622387-9622455:mpeak_86543|chrX_9431334_9684259_TBL1X_NM_+|	1225.28	-4.31751	1.60279	-2.69375	0.00706522	0.203115	0	0	5.69934	6.35534	0	3062.69	2317.59	2488.33	2408.68	1963.46	0	0.175712	-Inf	0.234339	-Inf	TBL1X	-	-
chr6:152188717-152188767:mpeak_74516|chr6_152011630_152419866_ESR1_NM_+|	1224.81	-5.16051	1.54208	-3.34646	0.000818505	0.105246	0	0	0	3.17767	5.54127	3779.54	3386.67	1805.55	1639.68	1627.9	0	0.171865	-Inf	1.08329	-Inf	ESR1	-	-
chr16:4918599-4918654:mpeak_31209|chr16_4897631_4930083_UBN1_NM_+|	909.214	-4.10832	1.55048	-2.6497	0.00805629	0.203115	0	0	3.4196	1.05922	4.30987	1836.5	2014.16	1671.05	1993.46	1568.18	0	0.167958	-Inf	0.14252	-Inf	UBN1	-	-
chr6:152069022-152069078:mpeak_74484|chr6_152011630_152419866_ESR1_NM_+|	1224.89	-3.70715	1.54416	-2.40076	0.0163611	0.247105	1.10967	0	2.27974	0	6.15696	3779.54	3386.67	1805.55	1639.68	1627.9	0.0154848	0.166302	-2.34158	1.08329	-3.42488	ESR1	-	-
chr3:62315121-62315216:mpeak_58116|chr3_62304647_62318929_C3orf14_NM_+|	802.003	-3.92953	1.5846	-2.47983	0.0131446	0.226587	0	0	3.4196	0	4.30987	1438.13	1923.9	1245.88	1676.75	1727.64	0	0.166216	-Inf	0.11698	-Inf	C3orf14	-	-
chr2:217026411-217026461:mpeak_50409|chr2_216974019_217069910_XRCC5_NM_+|	671.814	-3.71215	1.61984	-2.29168	0.0219242	0.277539	0	0	0	1.05922	5.54127	1045.31	1588.93	1105.67	1449.02	1522.62	0	0.161884	-Inf	-0.0452695	-Inf	XRCC5	-	-
chr6:152410516-152410567:mpeak_74560|chr6_152011630_152419866_ESR1_NM_+|	1224.97	-2.59924	1.15791	-2.24476	0.0247832	0.290015	2.21934	0	1.13987	2.11845	4.92557	3779.54	3386.67	1805.55	1639.68	1627.9	0.0309696	0.161318	-1.29769	1.08329	-2.38099	ESR1	-	-
chr6:152350635-152350688:mpeak_74549|chr6_152011630_152419866_ESR1_NM_+|	1224.97	-2.59738	1.16029	-2.23855	0.025185	0.291558	2.21934	0	0	3.17767	4.92557	3779.54	3386.67	1805.55	1639.68	1627.9	0.0309696	0.159729	-1.28341	1.08329	-2.3667	ESR1	-	-
chr19:18968976-18969026:mpeak_42018|chr19_18942743_18977329_UPF1_NM_+|	806.748	-4.15254	1.58469	-2.62041	0.00878244	0.206155	0	0	1.13987	0	5.54127	2171.62	1558.47	1395.2	1428.89	1506.61	0	0.154274	-Inf	0.369576	-Inf	UPF1	-	-
chr6:152020993-152021085:mpeak_74481|chr6_152011630_152419866_ESR1_NM_+|	1224.61	-4.97326	1.5898	-3.12823	0.00175862	0.138648	0	0	0	0	6.77266	3779.54	3386.67	1805.55	1639.68	1627.9	0	0.133501	-Inf	1.08329	-Inf	ESR1	-	-
chr6:152274453-152274505:mpeak_74534|chr6_152011630_152419866_ESR1_NM_+|	1224.61	-4.97326	1.5898	-3.12823	0.00175862	0.138648	0	0	0	0	6.77266	3779.54	3386.67	1805.55	1639.68	1627.9	0	0.133501	-Inf	1.08329	-Inf	ESR1	-	-
chr20:52829591-52829641:mpeak_53147|chr20_52824501_52835557_PFDN4_NM_+|	1378.13	-4.24456	1.59923	-2.65412	0.00795145	0.203115	0	0	0	4.2369	6.77266	2046.23	3213.74	2238.7	3310.07	2961.5	0	0.129368	-Inf	-0.109187	-Inf	PFDN4	-	-
chr3:133301757-133301831:mpeak_59674|chr3_133292433_133306002_CDV3_NM_+|	1116.57	-3.78291	1.57794	-2.39737	0.0165133	0.247105	0	0	5.69934	0	3.07848	1734.41	2615.58	2154.35	2274.15	2378.43	0	0.128954	-Inf	-0.0610286	-Inf	CDV3	-	-
chr3:71039592-71039642:mpeak_58348|chr3_71008542_71633140_FOXP1_NM_-|	937.702	-3.81982	1.63419	-2.33744	0.0194162	0.261236	0	0	0	0	7.38836	1733.31	1786.86	1718.92	1894.95	2235.59	0	0.126308	-Inf	-0.147698	-Inf	FOXP1	-	-
chr3:71304611-71304661:mpeak_58353|chr3_71008542_71633140_FOXP1_NM_-|	937.702	-3.81982	1.63419	-2.33744	0.0194162	0.261236	0	0	0	0	7.38836	1733.31	1786.86	1718.92	1894.95	2235.59	0	0.126308	-Inf	-0.147698	-Inf	FOXP1	-	-
chr14:21714857-21714916:mpeak_24398|chr14_21679465_21737638_HNRNPC_NM_-mpeak_24398|chr14_21679465_21737638_HNRNPC_NM_-||	1551.16	-4.05329	1.55394	-2.60839	0.00909689	0.206791	0	0	9.11895	0	3.07848	2618.82	3102.81	2926.04	3407.52	3444.2	0	0.124747	-Inf	-0.188116	-Inf	HNRNPC	-	-
chr20:46171899-46171953:mpeak_52657|chr20_46130600_46282149_NCOA3_NM_+|	3325.71	-2.07354	0.886589	-2.33878	0.0193466	0.261236	4.43868	0	2.27974	12.7107	6.77266	6937.66	8320.93	5799.65	5467.71	6704.93	0.0290897	0.121092	-1.70872	0.348809	-2.05753	NCOA3	-	-
chr18:3269161-3269223:mpeak_39333|chr18_3262110_3277762_MYL12B_NM_+|	1630.79	-3.76713	1.60404	-2.34852	0.0188481	0.259006	0	0	7.97908	5.29612	0	2456.81	2871.16	3366.03	4197.7	3402.95	0	0.12105	-Inf	-0.456507	-Inf	MYL12B	-	-
chr15:76571024-76571075:mpeak_29816|chr15_76508938_76603810_ETFA_NM_-|	2298.16	-4.64462	1.55927	-2.97872	0.00289459	0.175849	0	0	5.69934	3.17767	6.77266	3477.71	5331.22	3697.73	5459.24	5000.07	0	0.110543	-Inf	-0.0995184	-Inf	ETFA	-	-
chr13:31719157-31719209:mpeak_22820|chr13_31711661_31736525_HSPH1_NM_-|	1654.24	-3.69362	1.60986	-2.29437	0.0217693	0.276624	0	0	9.11895	2.11845	0.615696	3043.83	2551.42	3757.01	4231.6	2946.72	0	0.108393	-Inf	-0.381761	-Inf	HSPH1	-	-
chr16:85835414-85835470:mpeak_34021|chr16_85833172_85840343_COX4I1_NM_+|	2216.43	-4.71961	1.52282	-3.09926	0.00194007	0.144986	0	0	3.4196	4.2369	5.54127	4809.31	4829.86	3768.4	4662.7	4080.83	0	0.105481	-Inf	0.208638	-Inf	COX4I1	-	-
chr12:54668812-54668952:mpeak_19149|chr12_54635689_54673915_CBX5_NM_-|	1486.37	-3.65493	1.56128	-2.34099	0.0192328	0.261236	0	0	0	5.29612	4.92557	2757.53	1910.84	3505.09	3088.7	3591.36	0	0.100359	-Inf	-0.540512	-Inf	CBX5	-	-
chr5:170820640-170820690:mpeak_69728|chr5_170814707_170837530_NPM1_NM_+|	1613.83	-3.89421	1.54288	-2.52399	0.011603	0.220256	0	0	3.4196	0	4.92557	2987.23	3287.7	3380.85	3108.82	3365.4	0	0.084679	-Inf	-0.0663039	-Inf	NPM1	-	-
chr9:110057758-110057839:mpeak_84877|chr9_110045516_110091823_RAD23B_NM_+|	1522.54	-3.92855	1.5651	-2.51009	0.0120699	0.220256	0	0	1.13987	0	6.15696	3066.02	3029.95	2800.66	3408.58	2912.86	0	0.0799907	-Inf	0.00345136	-Inf	RAD23B	-	-
chr4:109579501-109579551:mpeak_64199|chr4_109571740_109588402_OSTC_NM_+|	1389.15	-3.63558	1.63459	-2.22416	0.0261377	0.297172	0	0	0	0	6.15696	2395.78	2945.12	2238.7	3266.65	3039.08	0	0.0720583	-Inf	-0.0929396	-Inf	OSTC	-	-
chr4:102211619-102211746:mpeak_63970|chr4_101947218_102268628_PPP3CA_NM_-|	6828.73	-3.39489	1.5953	-2.12805	0.0333326	0.326954	0	1.08756	9.11895	1.05922	16.6238	9727.37	9898.98	15192.2	15508.1	17932.8	0.00554133	0.0551106	-4.03821	-0.724182	-3.31403	PPP3CA	-	-
chr9:96315583-96315635:mpeak_84400|chr9_96213977_96326510_FAM120A_NM_+|	5142.32	-2.56348	1.14619	-2.23652	0.0253177	0.29278	1.10967	1.08756	2.27974	4.2369	9.23544	9413.33	12403.6	9097.29	10264.9	10226.1	0.0100712	0.0532375	-2.25682	0.145385	-2.40221	FAM120A	-	-
chr20:46263082-46263167:mpeak_52674|chr20_46130600_46282149_NCOA3_NM_+|	3323.91	-4.3017	1.55358	-2.7689	0.00562456	0.197157	0	0	1.13987	2.11845	4.92557	6937.66	8320.93	5799.65	5467.71	6704.93	0	0.0455361	-Inf	0.348809	-Inf	NCOA3	-	-
chr20:46274565-46274628:mpeak_52681|chr20_46130600_46282149_NCOA3_NM_+|	3323.86	-4.17091	1.56026	-2.67322	0.00751276	0.203115	0	0	3.4196	0	4.30987	6937.66	8320.93	5799.65	5467.71	6704.93	0	0.0430077	-Inf	0.348809	-Inf	NCOA3	-	-
chr8:116569349-116569399:mpeak_81910|chr8_116427312_116681255_TRPS1_NM_-|	3552.47	-3.31443	1.59422	-2.07904	0.037614	0.344633	0	0	0	0	6.15696	5793.59	5878.27	6769.68	8635.85	8441.2	0	0.0258189	-Inf	-0.445795	-Inf	TRPS1	-	-
chr1:115272205-115272341:mpeak_4326|chr1_115260837_115300671_CSDE1_NM_-|	15110.8	-2.43455	1.174	-2.07373	0.0381042	0.345481	2.21934	0	6.83921	0	8.00405	31333.8	33064	31519.6	23354.8	31818.6	0.0034463	0.0171216	-2.15664	0.156058	-2.3127	CSDE1	-	-
chr1:205713019-205713105:mpeak_7703|chr1_205687607_205719372_NUCKS1_NM_-|	9028.26	-3.21867	1.55106	-2.07514	0.0379738	0.345481	0	0	4.55947	1.05922	4.30987	13826.5	10226.3	22488.5	20274.6	23456.8	0	0.0149933	-Inf	-0.876095	-Inf	NUCKS1	-	-
chrX:122735840-122736006:mpeak_88309|chrX_122735189_122866904_THOC2_NM_-|	17.2405	1.94695	0.967606	2.01214	0.0442056	0.368415	8.87736	13.0507	2.27974	0	4.92557	22.1934	36.9771	22.7974	24.3621	36.9418	37.0592	8.56742	2.19061	0.0777123	2.1129	THOC2	chrX:122735931:-	chrX_123601944_-;chrX_123601972_-;chrX_123602005_-;chrX_123602105_-
chrX:109552372-109552428:mpeak_88135|chrX_109441862_109683461_AMMECR1_NM_-|	58.0396	1.80979	0.871015	2.07779	0.0377285	0.344759	3.32901	3.26268	1.13987	3.17767	4.92557	49.9352	38.0646	141.344	153.587	181.63	7.49058	1.93954	0.0972335	-1.85213	1.94936	AMMECR1	chrX:109552378:-	chrX_110309151_-
chr9:97784398-97784575:mpeak_84454|chr9_97488950_97848963_C9orf3_NM_+|	82.2321	1.38016	0.408646	3.37741	0.000731719	0.0999647	107.638	77.2168	59.2732	69.9088	51.7185	62.1415	67.4288	102.588	108.041	116.367	142.668	55.322	0.61616	-0.750573	1.36673	C9orf3	chr9:97784453:+;chr9:97784562:+	chr9_95022183_+;chr9_95022279_+
chr9:90342579-90342648:mpeak_84180|chr9_90340973_90345922_CTSL_NM_+|	127.107	1.13165	0.44793	2.52639	0.011524	0.220256	146.476	93.5303	93.4692	85.7971	75.7306	105.419	128.332	145.903	220.319	176.089	102.676	47.0204	0.497557	-0.629186	1.12674	CTSL	chr9:90342644:+	chr9_87727709_+
chr9:140151633-140151750:mpeak_86368|chr9_140149758_140167233_NELFB_NM_+|	392.907	1.51169	0.473087	3.19537	0.00139651	0.126212	37.7288	38.0646	22.7974	12.7107	11.0825	602.551	813.496	738.635	870.682	781.319	5.35247	1.94888	1.287	-0.170563	1.45756	NELFB	chr9:140151700:+;chr9:140151729:+	chr9_137257242_+;chr9_137257291_+;chr9_137257312_+
chr9:131085667-131085872:mpeak_85749|chr9_131084786_131095752_COQ4_NM_+|	92.7155	1.18316	0.422089	2.80311	0.00506126	0.197157	201.96	137.033	90.0496	91.0933	71.4208	67.6899	57.6407	64.9725	72.0272	73.2679	270.479	120.115	1.00957	-0.161525	1.17109	COQ4	chr9:131085863:+	chr9_128323438_+;chr9_128323511_+;chr9_128323582_+
chr9:117188268-117188322:mpeak_85180|chr9_117165216_117267736_DFNB31_NM_-|	14.0328	3.84129	1.49586	2.56795	0.0102302	0.212605	7.76769	6.52537	1.13987	0	0	29.9611	32.6268	22.7974	29.6583	9.85114	22.8368	1.82945	4.23334	0.591458	3.64188	DFNB31	chr9:117188273:-	chr9_114425994_-
chr9:116324346-116324400:mpeak_85154|chr9_116207008_116359047_RGS3_NM_+|	23.7718	1.79617	0.84632	2.12233	0.0338101	0.329587	7.76769	13.0507	2.27974	4.2369	1.23139	45.4965	50.0278	29.6366	47.6651	36.3261	21.7939	6.81878	2.01092	0.334587	1.67634	RGS3	chr9:116324399:+	chr9_113562118_+
chr8:95894190-95894245:mpeak_81300|chr8_95893973_95907482_CCNE2_NM_-|	11.5047	2.68234	1.19527	2.24414	0.0248237	NA	4.43868	7.61293	2.27974	3.17767	1.84709	14.4257	5.43781	43.315	15.8884	16.6238	60.6721	9.63309	1.30733	-1.34763	2.65496	CCNE2	chr8:95894192:-	chr8_94881967_-
chr8:62519013-62519078:mpeak_80545|chr8_62416068_62627199_ASPH_NM_-|	35.6096	2.1054	0.841225	2.50277	0.0123224	0.220573	4.43868	19.5761	3.4196	11.6515	4.92557	36.6191	32.6268	83.2104	70.968	88.6603	34.6804	8.23454	0.849128	-1.22523	2.07436	ASPH	chr8:62519020:-	chr8_61606448_-
chr8:52764675-52764731:mpeak_80340|chr8_52733278_52811746_PCMTD1_NM_-|	48.8466	2.19131	0.950507	2.30541	0.0211435	0.271381	4.43868	6.52537	0	5.29612	0.615696	78.7866	67.4288	78.6509	126.048	120.676	7.49856	1.81692	1.47607	-0.569046	2.04512	PCMTD1	chr8:52764678:-	chr8_51852119_-
chr8:33347787-33347855:mpeak_79969|chr8_33342684_33355949_MAK16_NM_+|	49.3939	1.31924	0.473066	2.78869	0.00529215	0.197157	36.6191	36.9771	25.0771	13.7699	22.7808	59.9222	55.4656	82.0705	83.6787	77.5777	63.7816	25.3271	0.841013	-0.491443	1.33246	MAK16	chr8:33347858:+	-
chr8:27366203-27366351:mpeak_79782|chr8_27348518_27401960_EPHX2_NM_+|	13.6955	3.30455	1.1468	2.88154	0.00395737	0.18411	6.65802	10.8756	3.4196	0	1.23139	23.3031	9.78805	17.098	30.7175	33.8633	52.9859	5.69425	2.49948	-0.718555	3.21803	EPHX2	chr8:27366263:+	chr8_27508737_+
chr8:144362980-144363069:mpeak_82591|chr8_144362685_144363870_LINC01604_NR_-|	52.8626	2.20996	1.08465	2.03748	0.0416016	0.359471	117.625	87.0049	109.427	106.982	66.4952	0	5.43781	22.7974	4.2369	8.61975	3763.1	793.471	0.117666	-2.12801	2.24567	LINC01604	chr8:144362951:-;chr8:144362998:-	chr8_143280783_-;chr8_143280828_-;chr8_143280885_-
chr8:133844637-133844824:mpeak_82403|chr8_133787603_133858025_PHF20L1_NM_+|	34.6676	2.19578	0.823844	2.66528	0.00769237	0.203115	12.2064	7.61293	0	6.35534	1.84709	51.0448	60.9034	78.6509	72.0272	56.0284	17.704	3.96815	1.85775	-0.299789	2.15753	PHF20L1	chr8:133844741:+;chr8:133844781:+;chr8:133844825:+;chr8:133844857:+	chr8_132832482_+;chr8_132832579_+
chr8:118543004-118543092:mpeak_81975|chr8_118532951_118552121_MED30_NM_+|	24.524	2.22686	1.13547	1.96118	0.0498581	0.390513	15.5354	4.35024	5.69934	0	6.15696	18.8644	35.8895	28.4967	69.9088	60.3382	36.3182	7.46883	1.33103	-0.950703	2.28174	MED30	chr8:118543084:+	chr8_117530844_+
chr7:7767469-7767568:mpeak_75421|chr7_7680266_7916911_UMAD1_NM_+|	26.1325	1.41324	0.656709	2.152	0.0313971	0.318402	23.3031	19.5761	22.7974	23.3029	14.161	18.8644	15.2259	29.6366	47.6651	46.7929	125.781	48.5608	0.0940078	-1.27905	1.37305	UMAD1	chr7:7767520:+;chr7:7767563:+	chr7_7727888_+;chr7_7727931_+;chr7_7727980_+
chr7:7760806-7760931:mpeak_75416|chr7_7680266_7916911_UMAD1_NM_+|	20.3514	2.55536	0.814034	3.13913	0.00169452	0.138254	17.7547	9.78805	4.55947	9.53301	3.69418	18.8644	15.2259	29.6366	47.6651	46.7929	80.7937	14.3332	1.21584	-1.27905	2.49489	UMAD1	chr7:7760862:+;chr7:7760932:+	chr7_7721230_+;chr7_7721300_+
chr7:44871549-44871633:mpeak_76230|chr7_44869762_44887725_H2AFV_NM_-|	48.4865	1.20727	0.54703	2.20695	0.0273177	0.302004	36.6191	27.189	18.2379	23.3029	22.1651	69.9092	38.0646	80.9306	77.3233	91.123	59.0959	25.546	0.587277	-0.622684	1.20996	H2AFV	chr7:44871577:-	chr7_44831978_-;chr7_44832017_-
chr7:27579498-27579555:mpeak_75769|chr7_27565991_27702620_HIBADH_NM_-|	4.32645	3.81758	1.56911	2.43296	0.0149759	NA	5.54835	7.61293	3.4196	3.17767	1.84709	1.10967	1.08756	4.55947	10.5922	4.30987	598.994	43.3899	1.2252	-2.56191	3.78711	HIBADH	chr7:27579500:-	chr7_27539883_-
chr7:151801817-151801979:mpeak_79009|chr7_151722758_151818630_GALNT11_NM_+|	52.952	1.60847	0.602386	2.67016	0.00758142	0.203115	17.7547	26.1015	7.97908	10.5922	4.30987	90.993	93.5303	99.1685	102.745	76.3463	23.7673	8.22297	1.52358	-0.0076665	1.53125	GALNT11	chr7:151801869:+;chr7:151801966:+	chr7_152104782_+;chr7_152104880_+
chr7:148718119-148718282:mpeak_78873|chr7_148701301_148725782_PDIA4_NM_-|	477.04	1.12228	0.366554	3.0617	0.00220086	0.158477	117.625	103.318	53.5738	59.3165	67.1109	786.756	780.869	791.069	1140.78	869.979	14.0941	6.42441	0.880632	-0.252827	1.13346	PDIA4	chr7:148718194:-	chr7_149021082_-;chr7_149021144_-
chr7:105138528-105138585:mpeak_77837|chr7_105098373_105162685_PUS7_NM_-|	19.7919	3.01629	1.27457	2.36652	0.0179561	0.253521	6.65802	4.35024	1.13987	1.05922	0	37.7288	42.4149	26.217	44.4874	33.8633	13.7357	2.10303	2.90857	0.201186	2.70738	PUS7	chr7:105138531:-	chr7_105498088_-
chr7:100959584-100959669:mpeak_77671|chr7_100958563_100965104_IFT22_NM_-|	62.4656	1.76621	0.844437	2.09159	0.0364755	0.340194	14.4257	5.43781	3.4196	4.2369	0.615696	164.231	101.143	108.287	117.574	105.284	7.48509	2.49806	1.84874	0.265527	1.58321	IFT22	chr7:100959612:-	chr7_101316334_-
chr6:96970779-96970840:mpeak_73137|chr6_96969701_97001160_UFL1_NM_+|	52.1968	1.75843	0.6461	2.7216	0.00649658	0.200485	13.316	19.5761	7.97908	4.2369	5.54127	102.09	66.3412	86.63	116.515	99.7428	19.5286	5.86265	1.4743	-0.261662	1.73596	UFL1	chr6:96970840:+	chr6_96522963_+
chr6:64396165-64396294:mpeak_72569|chr6_64345706_64421481_PHF3_NM_+|	162.493	1.26629	0.58564	2.16224	0.0305998	0.316676	14.4257	23.9263	12.5386	6.35534	4.30987	292.953	370.858	271.289	297.642	330.629	5.77755	2.57946	1.30991	0.146517	1.16339	PHF3	chr6:64396225:+	chr6_63686283_+;chr6_63686321_+;chr6_63686396_+
chr6:30635795-30635853:mpeak_71443|chr6_30621147_30640830_DHX16_NM_-|	36.577	1.74406	0.79237	2.20106	0.0277316	0.304399	5.54835	14.1383	1.13987	7.41457	2.46279	55.4835	64.1661	69.532	64.6127	81.2719	16.4536	5.11438	1.42242	-0.263351	1.68577	DHX16	chr6:30635799:-	chr6_30668026_-
chr6:18206155-18206241:mpeak_70810|chr6_18155618_18222139_KDM1B_NM_+|	14.2816	2.16996	1.05652	2.05388	0.0399874	0.353729	5.54835	9.78805	4.55947	6.35534	1.84709	6.65802	18.4885	43.315	22.2437	24.0122	60.9881	14.2478	0.850079	-1.24771	2.09778	KDM1B	chr6:18206242:+	chr6_18206010_+
chr6:159034162-159034421:mpeak_74714|chr6_158957467_159052841_TMEM181_NM_+|	116.912	1.91477	0.678957	2.82016	0.00479994	0.194494	18.8644	19.5761	5.69934	5.29612	0	272.979	318.655	170.98	163.12	193.944	6.49734	2.0823	2.39068	0.749007	1.64167	TMEM181	chr6:159034252:+;chr6:159034332:+	chr6_158613206_+;chr6_158613302_+;chr6_158613339_+
chr6:101306888-101307092:mpeak_73264|chr6_100957409_101329248_ASCC3_NM_-|	20.3984	1.86044	0.844232	2.2037	0.0275452	0.303541	15.5354	6.52537	4.55947	1.05922	3.69418	39.9481	27.189	37.6157	37.0728	30.7848	32.8592	8.8296	1.82915	-0.0667319	1.89588	ASCC3	chr6:101306885:-	chr6_100858988_-
chr5:21467035-21467205:mpeak_66002|chr5_21459588_21585638_GUSBP1_NR_+|	11.0486	4.57632	1.94072	2.35805	0.0183711	NA	32.1804	27.189	13.6784	15.8884	15.3924	0	0	0	0	6.15696	#DIV/0!	730.217	0.986068	-Inf	Inf	GUSBP1	chr5:21467206:+	chr5_21466996_+;chr5_21467096_+
chr5:178994515-178994579:mpeak_70110|chr5_178977561_179036376_RUFY1_NM_+|	78.7748	1.79243	0.874458	2.04976	0.0403881	0.355527	12.2064	3.26268	1.13987	6.35534	1.84709	98.7607	155.521	145.903	154.647	208.105	6.08343	1.83667	1.3125	-0.415297	1.72779	RUFY1	chr5:178994566:+	chr5_179567564_+
chr5:148876781-148877070:mpeak_69323|chr5_148876423_148931115_CSNK1A1_NM_-|	147.752	1.1716	0.537214	2.18089	0.0291914	0.310604	9.98703	15.2259	7.97908	6.35534	9.23544	230.811	221.862	295.226	364.373	316.468	5.56977	2.41478	0.68218	-0.523545	1.20573	CSNK1A1	chr5:148876783:-;chr5:148876841:-;chr5:148876883:-;chr5:148876998:-	chr5_149497223_-;chr5_149497457_-
chr5:112783805-112783882:mpeak_68027|chr5_112363179_112824527_MCC_NM_-|	14.0961	1.99926	0.913784	2.18789	0.0286777	0.30984	13.316	4.35024	9.11895	10.5922	4.92557	7.76769	7.61293	33.0562	24.3621	25.8592	114.861	29.5839	0.105149	-1.85185	1.957	MCC	chr5:112783807:-	chr5_113448112_-
chr4:75027914-75027976:mpeak_63293|chr4_75023828_75167413_MTHFD2L_NM_+|	12.9644	3.33249	1.6673	1.99873	0.0456372	NA	21.0837	34.802	17.098	16.9476	26.4749	1.10967	0	5.69934	2.11845	4.30987	5036.24	499.029	0.470016	-2.86514	3.33515	MTHFD2L	chr4:75027970:+	chr4_74162199_+;chr4_74162252_+
chr4:75025832-75026128:mpeak_63290|chr4_75023828_75167413_MTHFD2L_NM_+|	8.27647	4.02606	1.76015	2.28734	0.0221759	NA	11.0967	30.4517	7.97908	9.53301	10.4668	1.10967	0	5.69934	2.11845	4.30987	3744.21	230.703	1.15542	-2.86514	4.02055	MTHFD2L	chr4:75025893:+;chr4:75025940:+;chr4:75025966:+;chr4:75026001:+;chr4:75026035:+;chr4:75026129:+	chr4_74160179_+;chr4_74160197_+;chr4_74160245_+;chr4_74160283_+;chr4_74160411_+;chr4_74160473_+
chr4:184566401-184566454:mpeak_65461|chr4_184562624_184580372_RWDD4_NM_-|	48.6192	1.99204	0.959674	2.07575	0.0379175	0.345481	3.32901	8.70049	1.13987	1.05922	1.84709	74.3479	119.632	82.0705	109.1	84.9661	6.20142	1.46528	2.15691	0.0754853	2.08142	RWDD4	chr4:184566400:-	chr4_183645251_-
chr4:114378338-114378401:mpeak_64323|chr4_114375671_114683083_CAMK2D_NM_-|	73.4844	2.34374	0.888799	2.63698	0.00836483	0.203161	5.54835	16.3134	1.13987	5.29612	0.615696	156.464	129.42	170.98	141.936	107.131	7.6471	1.67878	2.21733	0.0298367	2.1875	CAMK2D	chr4:114378344:-	chr4_113457188_-
chr3:66020291-66020354:mpeak_58257|chr3_65342807_66024509_MAGI1_NM_-|	36.3222	1.88306	0.824227	2.28463	0.0223344	0.278472	11.0967	5.43781	2.27974	3.17767	1.23139	61.0319	81.5671	67.2522	66.7311	63.4167	11.5951	3.38845	1.89062	0.115804	1.77482	MAGI1	chr3:66020292:-	chr3_66034627_-
chr3:63894329-63894485:mpeak_58155|chr3_63850232_63985125_ATXN7_NM_+|	136.888	2.64561	0.758491	3.48799	0.000486673	0.0880451	7.76769	20.6637	1.13987	1.05922	4.30987	244.127	256.664	263.31	240.444	329.398	5.67728	0.781247	2.71194	-0.149404	2.86135	ATXN7	chr3:63894400:+	chr3_63908721_+
chr3:5018279-5018495:mpeak_56235|chr3_4940620_5021646_BHLHE40-AS1_NR_-|	5.83137	3.36538	1.51041	2.22812	0.0258724	NA	3.32901	16.3134	6.83921	3.17767	3.07848	3.32901	0	9.11895	6.35534	6.77266	590.038	58.8636	1.16988	-2.15548	3.32536	BHLHE40-AS1	chr3:5018303:-;chr3:5018394:-;chr3:5018451:-	chr3_4976620_-;chr3_4976698_-;chr3_4976748_-
chr3:42842362-42842412:mpeak_57344|chr3_42826812_42846027_HIGD1A_NM_-|	118.295	1.34702	0.624825	2.15584	0.0310964	0.318061	18.8644	18.4885	5.69934	10.5922	6.77266	180.876	258.84	160.721	269.043	253.051	8.49479	3.37781	1.28053	-0.0499618	1.33049	HIGD1A	chr3:42842342:-	-
chr3:37210770-37210845:mpeak_57122|chr3_37095452_37217851_LRRFIP2_NM_-|	68.8145	1.66615	0.746578	2.23172	0.0256338	0.295834	5.54835	8.70049	1.13987	4.2369	2.46279	125.393	117.457	152.742	123.929	146.536	5.86736	1.85241	1.44696	-0.21634	1.6633	LRRFIP2	chr3:37210791:-	chr3_37169304_-
chr3:33723176-33723231:mpeak_57053|chr3_33540209_33759705_CLASP2_NM_-|	41.4071	2.65275	0.940816	2.81963	0.00480789	0.194494	5.54835	13.0507	2.27974	2.11845	1.84709	52.1545	75.0417	51.2941	97.4486	113.288	14.6224	2.38341	2.15936	-0.457718	2.61708	CLASP2	chr3:33723175:-	chr3_33681684_-
chr3:25818329-25818385:mpeak_56883|chr3_25761126_25831530_NGLY1_NM_-|	28.422	2.1626	0.816125	2.64984	0.00805307	0.203115	11.0967	14.1383	2.27974	5.29612	0.615696	46.6062	63.0785	49.0143	50.8427	41.2517	23.0069	5.80513	2.20818	0.221518	1.98666	NGLY1	chr3:25818333:-	chr3_25776844_-
chr3:196286722-196286808:mpeak_61574|chr3_196281678_196295413_WDR53_NM_-|	24.7733	1.59622	0.716913	2.22652	0.0259791	0.297172	26.6321	34.802	28.4967	33.8952	14.7767	9.98703	13.0507	34.196	25.4214	26.4749	266.667	89.6346	0.255987	-1.31692	1.57291	WDR53	chr3:196286708:-;chr3:196286734:-	chr3_196559851_-
chr3:194305330-194305468:mpeak_61417|chr3_194304996_194310583_TMEM44-AS1_NR_+|	7.47709	3.47053	1.72227	2.01509	0.0438949	NA	32.1804	3.26268	4.55947	5.29612	11.6982	1.10967	1.08756	5.69934	7.41457	2.46279	1613.08	138.372	1.30252	-2.24067	3.54319	TMEM44-AS1	chr3:194305336:+;chr3:194305494:+	chr3_194584709_+
chr3:183907931-183907987:mpeak_61138|chr3_183903862_183911327_ABCF3_NM_+|	33.81	3.58841	1.28732	2.78749	0.00531173	0.197157	8.87736	3.26268	0	2.11845	0	58.8125	58.7283	44.4549	76.2641	85.5818	10.3284	1.02687	3.10366	-0.226625	3.33028	ABCF3	chr3:183907988:+	chr3_184190196_+
chr3:169861452-169861534:mpeak_60751|chr3_169815172_169899537_PHC3_NM_-|	160.608	1.40769	0.449255	3.13339	0.00172801	0.138254	19.9741	35.8895	15.9582	20.1253	19.0866	195.302	216.425	384.136	327.3	371.881	13.5681	5.09269	0.602987	-0.810733	1.41372	PHC3	chr3:169861475:-	-
chr3:15011808-15011866:mpeak_56620|chr3_14989090_15084340_NR2C2_NM_+mpeak_56620|chr3_14989090_15084340_NR2C2_NM_+||	55.5815	2.12174	0.946099	2.24263	0.024921	0.290619	6.65802	9.78805	0	7.41457	0	83.2253	113.106	103.728	111.219	120.676	8.37668	2.2092	1.73427	-0.188586	1.92286	NR2C2	chr3:15011865:+	chr3_14970351_+
chr3:138191975-138192036:mpeak_59840|chr3_138153414_138195659_ESYT3_NM_+|	3.03902	6.19891	1.92258	3.22426	0.00126297	NA	7.76769	6.52537	0	0	0	2.21934	2.17512	4.55947	5.29612	1.84709	325.252	0	Inf	-0.828118	Inf	ESYT3	chr3:138192037:+	chr3_138473194_+
chr3:133921453-133921655:mpeak_59729|chr3_133877108_133969586_RYK_NM_-|	203.234	1.54506	0.571756	2.7023	0.00688621	0.203115	22.1934	17.401	5.69934	9.53301	5.54127	348.437	442.637	310.044	422.63	448.227	5.00514	1.75913	1.51551	0.00695833	1.50855	RYK	chr3:133921422:-	chr3_134202753_-
chr22:46722615-46722674:mpeak_56047|chr22_46692637_46725943_GTSE1_NM_+|	59.3151	1.7305	0.833325	2.07662	0.0378368	0.345456	4.43868	8.70049	1.13987	7.41457	0.615696	97.651	89.18	142.484	123.929	117.598	7.03265	2.38799	1.10382	-0.45445	1.55827	GTSE1	chr22:46722672:+	chr22_46326775_+
chr21:22906918-22907022:mpeak_53770|chr21_22370632_22910166_NCAM2_NM_+|	36.6362	1.93268	0.718841	2.68861	0.00717509	0.203115	25.5224	11.9632	7.97908	11.6515	5.54127	44.3868	42.4149	74.0914	91.0933	51.7185	43.1853	11.6051	1.15949	-0.736294	1.89578	NCAM2	chr21:22906977:+	chr21_21534655_+
chr20:62695817-62695871:mpeak_53629|chr20_62688438_62703524_TCEA2_NM_+|	51.2776	4.8828	1.28575	3.79763	0.000146088	0.0600644	9.98703	8.70049	0	0	0.615696	100.98	93.5303	106.008	93.2117	99.7428	9.60747	0.205944	5.50868	-0.0351546	5.54383	TCEA2	chr20:62695871:+	chr20_64064517_+
chr20:31973328-31973396:mpeak_52020|chr20_31946929_31989375_CDK5RAP1_NM_-|	54.8731	1.90082	0.928736	2.04667	0.0406907	0.357317	3.32901	14.1383	5.69934	1.05922	0.615696	110.967	110.931	90.0496	90.034	121.908	7.87176	2.44188	1.82905	0.140353	1.6887	CDK5RAP1	chr20:31973330:-	chr20_33385530_-
chr20:30813958-30814018:mpeak_51963|chr20_30795695_30822275_POFUT1_NM_+|	50.0864	2.37227	0.799362	2.96771	0.00300032	0.177718	4.43868	10.8756	3.4196	3.17767	1.23139	67.6899	72.8666	109.427	129.225	98.5114	10.8955	2.32192	1.553	-0.677338	2.23034	POFUT1	chr20:30814019:+	chr20_32226205_+
chr2:86484384-86484434:mpeak_47180|chr2_86444233_86565206_REEP1_NM_-|	12.8679	3.0154	1.21101	2.48999	0.0127745	NA	3.32901	7.61293	2.27974	0	2.46279	9.98703	14.1383	17.098	24.3621	47.4086	45.3546	5.33654	1.7911	-1.29617	3.08727	REEP1	chr2:86484383:-	chr2_86257261_-
chr2:61236983-61237051:mpeak_46293|chr2_61169568_61245365_PUS10_NM_-|	3.72739	4.26038	2.11462	2.01473	0.0439328	NA	5.54835	7.61293	7.97908	4.2369	3.07848	0	0	0	6.35534	2.46279	#DIV/0!	173.443	0.368254	-Inf	Inf	PUS10	chr2:61236983:-	chr2_61009848_-
chr2:47707932-47708148:mpeak_46054|chr2_47630205_47709917_MSH2_NM_+|	97.0483	1.90563	0.649304	2.93488	0.00333673	0.18202	26.6321	10.8756	9.11895	3.17767	8.61975	163.122	127.245	182.379	240.444	198.87	12.9174	3.36442	1.42752	-0.513365	1.94088	MSH2	chr2:47708079:+	chr2_47480846_+;chr2_47480938_+
chr2:46072846-46072920:mpeak_45966|chr2_45879042_46411873_PRKCE_NM_+|	31.3094	1.64521	0.622499	2.64291	0.00821972	0.203115	68.7996	50.0278	30.7764	31.7767	23.3965	18.8644	14.1383	27.3568	30.7175	17.2395	360.054	114.122	1.05227	-0.605369	1.65764	PRKCE	chr2:46072897:+	chr2_45845757_+
chr2:33253306-33253362:mpeak_45603|chr2_33172368_33623430_LTBP1_NM_+|	37.7173	4.33351	1.37689	3.14731	0.0016478	0.136907	7.76769	3.26268	0	0	0	81.0059	109.844	52.4339	69.9088	52.9499	5.77962	0	Inf	0.707634	Inf	LTBP1	chr2:33253395:+	chr2_33028340_+
chr2:202006162-202006341:mpeak_49971|chr2_201980826_202027718_CFLAR_NM_+|	215.601	0.665785	0.2779	2.39577	0.0165856	0.247105	240.798	255.577	250.771	244.681	256.13	120.954	145.733	227.974	199.134	214.262	186.126	117.184	-0.0135354	-0.681046	0.66751	CFLAR	chr2:202006216:+;chr2:202006321:+	chr2_201141490_+;chr2_201141537_+;chr2_201141596_+
chr2:201755325-201755379:mpeak_49933|chr2_201754049_201768216_NIF3L1_NM_+|	89.4652	2.77213	1.03181	2.68667	0.00721674	0.203115	9.98703	5.43781	1.13987	4.2369	0	90.993	196.849	150.463	244.681	190.866	5.3588	0.917522	2.10541	-0.440686	2.54609	NIF3L1	chr2:201755380:+	chr2_200890654_+
chr2:201755029-201755209:mpeak_49932|chr2_201754049_201768216_NIF3L1_NM_+|	100.012	1.33041	0.661946	2.00984	0.0444481	0.369011	32.1804	36.9771	19.3778	25.4214	12.3139	90.993	196.849	150.463	244.681	190.866	24.0262	9.7461	0.861028	-0.440686	1.30171	NIF3L1	chr2:201755199:+	chr2_200890471_+
chr2:191799958-191800025:mpeak_49708|chr2_191745546_191827555_GLS_NM_+|	87.1138	1.65181	0.775854	2.12902	0.0332522	0.326954	112.077	204.461	140.204	209.726	147.151	2.21934	7.61293	12.5386	14.8291	20.318	3219.38	1042.41	-0.0661404	-1.693	1.62686	GLS	chr2:191799979:+;chr2:191800015:+	chr2_190935288_+
chr2:169745897-169746054:mpeak_49105|chr2_169728065_169746944_SPC25_NM_-|	52.3367	1.15415	0.551936	2.0911	0.0365193	0.340194	38.8385	19.5761	33.0562	25.4214	25.2435	55.4835	35.8895	99.1685	99.567	91.123	63.9298	28.8834	0.0656993	-1.08055	1.14625	SPC25	chr2:169745897:-	-
chr2:144935448-144935537:mpeak_48639|chr2_144704702_145090101_GTDC1_NM_-|	9.69421	2.47268	1.18354	2.08922	0.0366883	NA	9.98703	20.6637	4.55947	6.35534	3.07848	9.98703	5.43781	4.55947	9.53301	22.7808	198.71	37.9497	1.71615	-0.672357	2.3885	GTDC1	chr2:144935455:-	chr2_144177889_-;chr2_144177920_-
chr19:52503376-52503428:mpeak_43910|chr19_52498090_52511483_ZNF615_NM_-|	8.83395	3.80759	1.4776	2.57688	0.0099697	NA	6.65802	4.35024	0	2.11845	0	8.87736	14.1383	9.11895	19.066	24.0122	47.8295	4.05855	2.96247	-0.596392	3.55886	ZNF615	chr19:52503378:-	chr19_52000123_-
chr19:46288498-46288570:mpeak_43395|chr19_46287548_46296060_DMWD_NM_-|	67.4007	2.02123	0.632852	3.19385	0.0014039	0.126212	13.316	17.401	2.27974	4.2369	4.30987	128.722	126.157	106.008	139.818	131.759	12.0516	2.86731	2.08943	0.0179754	2.07146	DMWD	chr19:46288495:-	chr19_45785256_-
chr19:44251385-44251435:mpeak_43216|chr19_44235826_44259142_SMG9_NM_-|	19.0851	4.79697	1.54826	3.09829	0.00194639	0.144986	3.32901	7.61293	0	0	0	58.8125	20.6637	22.7974	41.3097	36.3261	13.7676	0	Inf	0.247321	Inf	SMG9	chr19:44251384:-	chr19_43747230_-
chr19:3782422-3782498:mpeak_40908|chr19_3778420_3801810_MATK_NM_-|	32.0937	1.55065	0.6832	2.26968	0.0232269	0.283532	16.6451	20.6637	4.55947	6.35534	8.00405	36.6191	67.4288	52.4339	61.435	46.7929	35.8572	11.7756	1.56465	-0.0418168	1.60647	MATK	chr19:3782439:-;chr19:3782475:-	chr19_3782444_-
chr19:34243566-34243717:mpeak_42520|chr19_34112860_34262861_CHST8_NM_+|	9.91196	3.55776	1.70491	2.08678	0.0369083	NA	17.7547	3.26268	0	1.05922	0	21.0837	28.2766	15.9582	7.41457	4.30987	42.5796	3.82632	4.89547	1.41934	3.47613	CHST8	chr19:34243618:+;chr19:34243720:+	chr19_33752711_+;chr19_33752813_+
chr19:19765349-19765406:mpeak_42096|chr19_19756341_19774503_ATP13A1_NM_-|	31.5317	3.42802	1.26829	2.70287	0.00687444	0.203115	7.76769	3.26268	1.13987	1.05922	0	46.6062	64.1661	46.7346	68.8495	75.7306	9.95771	1.14946	2.91146	-0.203389	3.11485	ATP13A1	chr19:19765347:-	-
chr19:1223823-1223874:mpeak_40688|chr19_1205797_1227591_STK11_NM_+|	99.1637	2.11905	0.620231	3.41655	0.000634205	0.0970503	14.4257	16.3134	4.55947	7.41457	1.84709	187.534	154.434	214.295	205.489	185.325	8.98889	2.28407	1.73816	-0.238372	1.97654	STK11	chr19:1223874:+	chr19_1223874_+
chr17:78404085-78404179:mpeak_38964|chr17_78388966_78409932_ENDOV_NM_+|	64.9306	1.1013	0.429546	2.56388	0.0103508	0.213358	120.954	100.056	75.2313	75.2049	65.2638	28.8514	40.2398	42.1751	50.8427	50.4871	319.881	150.308	0.620046	-0.469564	1.08961	ENDOV	chr17:78404143:+;chr17:78404171:+	chr17_80430342_+
chr17:5294792-5294847:mpeak_34860|chr17_5289589_5323059_NUP88_NM_-|	47.7928	1.94237	0.827638	2.34688	0.0189313	0.259489	3.32901	8.70049	3.4196	2.11845	1.84709	66.5802	75.0417	88.9097	123.929	104.053	8.49409	2.33049	1.28884	-0.576982	1.86582	NUP88	chr17:5294795:-	chr17_5391483_-;chr17_5391501_-
chr17:48754152-48754216:mpeak_37202|chr17_48712217_48768452_ABCC3_NM_+|	77.8317	2.76703	1.06788	2.59114	0.00956577	0.209033	1.10967	9.78805	2.27974	4.2369	0	107.638	61.991	177.819	240.444	173.011	6.42444	1.10213	1.32679	-1.21648	2.54327	ABCC3	chr17:48754210:+	chr17_50676855_+
chr17:40667030-40667086:mpeak_36631|chr17_40610861_40673044_ATP6V0A1_NM_+|	40.5847	2.31709	0.783822	2.95615	0.0031151	0.177718	7.76769	14.1383	4.55947	0	2.46279	65.4706	80.4795	70.6718	85.7971	74.4992	15.0092	3.04036	2.22628	-0.0772569	2.30354	ATP6V0A1	chr17:40667084:+	chr17_42515064_+
chr17:34868906-34869093:mpeak_36179|chr17_34852250_34891305_MYO19_NM_-|	112.78	1.11091	0.448608	2.47635	0.0132734	0.226587	128.722	126.157	111.707	135.581	86.1975	53.2642	88.0924	134.504	139.818	123.755	180.309	83.7741	0.197151	-0.908745	1.1059	MYO19	chr17:34868903:-;chr17:34868929:-	chr17_36513089_-
chr16:85113297-85113443:mpeak_33960|chr16_85061356_85121881_KIAA0513_NM_+|	91.9376	1.45059	0.429042	3.381	0.000722216	0.0999647	87.664	114.194	103.728	86.8564	110.21	41.0578	41.3273	103.728	96.3894	134.222	245.017	89.9667	0.00952657	-1.43589	1.44542	KIAA0513	chr16:85113360:+;chr16:85113425:+	chr16_85079773_+;chr16_85079832_+
chr16:81062170-81062396:mpeak_33790|chr16_81040102_81066174_CENPN_NM_+|	20.0698	3.37726	1.66285	2.03101	0.0422538	0.36249	35.5095	27.189	38.7555	38.1321	52.3342	0	0	5.69934	0	3.07848	#DIV/0!	1472.14	-0.458384	-Inf	Inf	CENPN	chr16:81062245:+;chr16:81062275:+;chr16:81062363:+;chr16:81062393:+	chr16_81028668_+;chr16_81028787_+
chr16:58197633-58197686:mpeak_32906|chr16_58192257_58231782_CSNK2A2_NM_-|	26.1639	3.92656	1.2302	3.1918	0.00141389	0.126212	4.43868	8.70049	0	2.11845	0	34.3998	46.7651	52.4339	56.1389	56.6441	16.1882	1.28222	3.21776	-0.44047	3.65823	CSNK2A2	chr16:58197605:-;chr16:58197631:-	chr16_58163713_-;chr16_58163745_-
chr16:4805682-4805732:mpeak_31188|chr16_4803059_4817219_ZNF500_NM_-|	44.4987	3.34229	1.25336	2.66666	0.007661	0.203115	3.32901	10.8756	1.13987	1.05922	0	90.993	98.9681	70.6718	61.435	106.515	7.47765	0.921579	3.27634	0.255937	3.02041	ZNF500	chr16:4805681:-	chr16_4755684_-
chr16:3823635-3823752:mpeak_31110|chr16_3779875_3930121_CREBBP_NM_-|	96.6609	2.37026	0.744577	3.18337	0.00145574	0.127833	23.3031	22.8388	10.2588	3.17767	1.84709	138.709	215.337	155.022	237.266	158.85	13.0327	2.77309	2.17906	-0.0535144	2.23257	CREBBP	chr16:3823644:-;chr16:3823698:-	chr16_3773637_-;chr16_3773699_-
chr16:28930772-28930876:mpeak_32173|chr16_28916365_28936532_RABEP2_NM_-|	66.6107	1.21444	0.510244	2.38011	0.0173074	0.250691	22.1934	30.4517	10.2588	8.47379	6.77266	149.806	131.595	107.148	102.745	96.6643	18.7083	8.31992	1.63047	0.461433	1.16903	RABEP2	chr16:28930803:-	chr16_28919483_-
chr16:23638960-23639010:mpeak_31985|chr16_23614990_23652678_PALB2_NM_-|	32.6272	2.5917	1.20268	2.15495	0.031166	0.31824	0	13.0507	2.27974	1.05922	1.23139	36.6191	65.2537	58.1333	74.1457	74.4992	12.8108	2.21027	2.09872	-0.436353	2.53507	PALB2	chr16:23638957:-	chr16_23627634_-
chr16:19085377-19085436:mpeak_31726|chr16_19078916_19089402_COQ7_NM_+|	44.8381	2.39558	1.03902	2.30561	0.0211323	0.271381	2.21934	13.0507	6.83921	1.05922	0.615696	51.0448	67.4288	84.3503	109.1	112.672	12.889	2.78128	1.42774	-0.784582	2.21232	COQ7	chr16:19085434:+	chr16_19074110_+
chr16:14669920-14670002:mpeak_31521|chr16_14530629_14724128_PARN_NM_-|	69.7286	1.68352	0.78536	2.14363	0.0320625	0.321249	5.54835	19.5761	4.55947	9.53301	1.84709	113.186	114.194	147.043	145.114	136.685	11.0495	3.71689	1.24144	-0.330374	1.57182	PARN	chr16:14669932:-	chr16_14576063_-
chr15:82449609-82449680:mpeak_30010|chr15_82422902_82555104_EFTUD1_NM_-|	20.5055	3.27953	1.1906	2.75451	0.00587797	0.19874	2.21934	11.9632	2.27974	0	0.615696	27.7418	39.1522	36.4758	47.6651	36.9418	21.2015	2.39129	2.87722	-0.271082	3.14831	EFTUD1	chr15:82449613:-	chr15_82157265_-
chr15:63358240-63358372:mpeak_29169|chr15_63334837_63363288_TPM1_NM_+|	214.755	0.959389	0.438595	2.18741	0.0287123	0.30984	33.2901	35.8895	18.2379	26.4806	27.7063	305.159	349.107	365.898	488.302	497.483	10.5736	5.35812	0.518826	-0.461844	0.980669	TPM1	chr15:63358292:+;chr15:63358377:+	chr15_63066052_+;chr15_63066092_+;chr15_63066175_+
chr15:63356356-63356551:mpeak_29167|chr15_63334837_63363288_TPM1_NM_+|	237.665	1.20385	0.433477	2.77721	0.00548281	0.197157	88.7736	105.493	58.1333	75.2049	43.0987	305.159	349.107	365.898	488.302	497.483	29.6923	13.0531	0.723851	-0.461844	1.18569	TPM1	chr15:63356426:+;chr15:63356523:+	chr15_63064225_+;chr15_63064322_+
chr15:50578067-50578357:mpeak_28578|chr15_50570981_50647605_GABPB1_NM_-|	86.7516	0.954248	0.48165	1.9812	0.0475683	0.38285	98.7607	143.558	103.728	97.4486	68.3423	57.7029	55.4656	98.0287	65.6719	78.8091	214.122	111.137	0.431482	-0.514608	0.94609	GABPB1	chr15:50578081:-;chr15:50578195:-	chr15_50285870_-;chr15_50285938_-;chr15_50285999_-
chr15:48454426-48454492:mpeak_28488|chr15_48446090_48470558_MYEF2_NR_-mpeak_28488|chr15_48435268_48470558_MYEF2_NM_-||	54.5365	1.41953	0.621164	2.28528	0.0222964	0.278472	21.0837	11.9632	13.6784	8.47379	5.54127	79.8963	75.0417	124.246	92.1525	113.288	21.3291	8.39995	0.839932	-0.50444	1.34437	MYEF2	chr15:48454437:-	chr15_48162241_-
chr15:44830823-44830883:mpeak_28397|chr15_44829265_44853215_EIF3J_NM_+|	167.91	1.1486	0.453832	2.53089	0.0113773	0.220227	44.3868	40.2398	27.3568	34.9544	16.6238	250.786	253.402	364.758	306.116	340.48	16.7848	7.80489	0.685408	-0.419293	1.1047	EIF3J	chr15:44830879:+	chr15_44538679_+
chr14:93753797-93754096:mpeak_27106|chr14_93709434_93799438_BTBD7_NM_-|	423.515	1.41617	0.433452	3.2672	0.00108618	0.123021	62.1415	38.0646	25.0771	31.7767	25.2435	578.138	698.214	829.824	875.978	1070.7	7.85098	2.95687	0.872526	-0.536277	1.4088	BTBD7	chr14:93753974:-	chr14_93287488_-;chr14_93287630_-
chr14:74573877-74573937:mpeak_26482|chr14_74551655_74665624_LIN52_NM_+|	64.6439	1.43943	0.669114	2.15125	0.0314567	0.318402	11.0967	9.78805	1.13987	4.2369	5.54127	138.709	102.231	123.106	124.988	125.602	8.66805	2.92163	1.5207	-0.0482323	1.56893	LIN52	chr14:74573930:+	chr14_74107227_+
chr14:21559840-21559977:mpeak_24375|chr14_21559299_21572863_ZNF219_NM_-|	186.312	1.09785	0.414749	2.64702	0.00812043	0.203115	84.335	97.8805	37.6157	33.8952	24.0122	352.875	402.398	238.232	328.359	263.518	24.1258	11.5073	1.51669	0.448658	1.06803	ZNF219	chr14:21559834:-;chr14:21559914:-	chr14_21091665_-;chr14_21091756_-
chr14:105480205-105480265:mpeak_27639|chr14_105478272_105487425_CDCA4_NM_-|	59.4134	5.42597	1.33486	4.06482	4.80693e-05	0.0370855	3.32901	8.70049	0	0	0	98.7607	110.931	110.567	123.929	137.916	5.73675	0	Inf	-0.243667	Inf	CDCA4	chr14:105480206:-	chr14_105013871_-
chr14:103410150-103410256:mpeak_27487|chr14_103400180_103523742_CDC42BPB_NM_-|	94.6602	1.74687	0.823489	2.1213	0.0338962	0.329792	12.2064	7.61293	1.13987	6.35534	1.84709	119.844	245.789	185.799	180.068	185.94	5.42054	1.69304	1.67002	-0.00880379	1.67882	CDC42BPB	chr14:103410150:-;chr14:103410176:-;chr14:103410205:-	chr14_102943818_-
chr13:99059696-99059746:mpeak_23973|chr13_98794815_99100489_FARP1_NM_+|	54.1105	4.52474	1.35767	3.33272	0.00086001	0.109282	7.76769	10.8756	0	0	0.615696	94.322	143.558	66.1124	95.3301	122.524	7.83727	0.21682	5.50526	0.329478	5.17578	FARP1	chr13:99059748:+	chr13_98407492_+
chr13:34411578-34411647:mpeak_22917|chr13_34392205_34540223_RFC3_NM_+|	149.675	3.99471	1.54186	2.59084	0.00957432	0.209033	235.25	169.66	376.157	371.788	327.55	0	0	6.83921	2.11845	7.38836	#DIV/0!	6579.55	-0.824366	-Inf	Inf	RFC3	chr13:34411582:+;chr13:34411633:+	chr13_33837466_+;chr13_33837499_+
chr13:20276389-20276527:mpeak_22338|chr13_20249793_20357159_PSPC1_NR_-|	48.7019	3.51442	0.922582	3.80933	0.000139346	0.0600644	11.0967	11.9632	4.55947	0	0	81.0059	84.8298	84.3503	114.396	94.8172	13.9053	1.55315	2.92341	-0.238956	3.16236	PSPC1	chr13:20276475:-	chr13_19702337_-
chr13:115068137-115068202:mpeak_24261|chr13_115047058_115070263_UPF3A_NM_+|	10.8513	2.57157	1.30247	1.97438	0.0483389	NA	8.87736	6.52537	4.55947	1.05922	0	12.2064	18.4885	7.97908	25.4214	23.3965	50.1801	9.89261	2.03984	-0.30285	2.34269	UPF3A	chr13:115068191:+	chr13_114302715_+
chr12:98929348-98929432:mpeak_20573|chr12_98909350_98941350_TMPO_NM_+|	509.966	1.51699	0.304302	4.98515	6.19134e-07	0.00668727	387.275	402.398	404.653	545.5	439.607	219.715	264.277	750.033	842.083	844.12	163.158	57.0454	-0.230547	-1.74664	1.51609	TMPO	chr12:98929407:+	chr12_98535573_+;chr12_98535627_+
chr12:98925554-98925690:mpeak_20568|chr12_98909350_98941350_TMPO_NM_+|	337.595	1.4276	0.346271	4.1228	3.74301e-05	0.0370855	66.5802	92.4427	85.4901	105.922	105.284	219.715	264.277	750.033	842.083	844.12	32.8565	12.1785	-0.314791	-1.74664	1.43184	TMPO	chr12:98925617:+	-
chr12:56549572-56549672:mpeak_19304|chr12_56546203_56551665_MYL6B_NM_+|	107.076	1.45138	0.688997	2.10651	0.0351603	0.335549	13.316	8.70049	4.55947	1.05922	5.54127	165.341	252.314	213.155	190.66	216.109	5.27146	1.80021	1.56522	0.0151806	1.55004	MYL6B	chr12:56549625:+;chr12:56549665:+	chr12_56155797_+
chr12:46384118-46384175:mpeak_18405|chr12_46315977_46384401_SCAF11_NM_-|	483.635	0.913784	0.430716	2.12154	0.0338761	0.329792	419.455	268.628	254.191	308.234	245.047	457.184	584.02	593.871	888.689	817.029	66.0853	35.1137	0.354133	-0.55816	0.912293	SCAF11	chr12:46384135:-	-
chr12:46354222-46354314:mpeak_18400|chr12_46315977_46384401_SCAF11_NM_-|	395.459	1.3859	0.45626	3.03753	0.00238527	0.161202	158.683	175.097	64.9725	97.4486	117.598	457.184	584.02	593.871	888.689	817.029	32.0571	12.1769	0.838336	-0.55816	1.3965	SCAF11	chr12:46354238:-	chr12_45960457_-
chr12:33046367-33046520:mpeak_18181|chr12_32945426_33049780_PKP2_NM_-|	41.785	2.23748	0.906946	2.46705	0.0136231	0.226979	3.32901	9.78805	0	3.17767	1.23139	76.5673	79.392	86.63	82.6195	75.1149	8.41057	1.8043	2.15786	-0.0629028	2.22077	PKP2	chr12:33046369:-	chr12_32893435_-
chr12:133624634-133624704:mpeak_22281|chr12_133613871_133633539_ZNF84_NM_+|	50.7198	1.82711	0.903576	2.02209	0.0431669	0.365475	6.65802	6.52537	0	5.29612	0.615696	97.651	102.231	121.966	79.4418	86.8132	6.59559	2.05114	1.74201	0.0569344	1.68508	ZNF84	chr12:133624696:+	chr12_133048109_+
chr12:132419416-132419491:mpeak_22157|chr12_132413744_132428083_PUS1_NM_+|	150.586	1.09275	0.511479	2.13645	0.0326429	0.324655	94.322	125.07	63.8326	52.9612	67.7266	144.257	250.139	184.659	222.437	300.46	55.6272	26.0786	0.83469	-0.258235	1.09292	PUS1	chr12:132419473:+	chr12_131934923_+
chr12:113625025-113625240:mpeak_21316|chr12_113623330_113629114_RITA1_NM_+|	211.146	1.08987	0.508181	2.14465	0.0319806	0.321249	44.3868	23.9263	18.2379	10.5922	14.161	439.429	417.623	310.044	427.926	405.128	7.9707	3.76093	1.25309	0.169469	1.08362	RITA1	chr12:113625104:+;chr12:113625241:+	chr12_113187298_+;chr12_113187437_+
chr12:113402619-113402670:mpeak_21295|chr12_113376237_113407766_OAS3_NM_+|	58.881	2.75467	1.04571	2.63427	0.00843196	0.203161	6.65802	5.43781	0	2.11845	1.84709	123.173	45.6776	123.106	158.884	121.908	7.16361	0.981818	2.19388	-0.673275	2.86716	OAS3	chr12:113402671:+	-
chr12:110459054-110459145:mpeak_21070|chr12_110437234_110475163_ANKRD13A_NM_+|	41.4361	2.11068	0.817975	2.58037	0.00986942	0.209975	4.43868	17.401	2.27974	2.11845	3.69418	83.2253	59.8159	83.2104	83.6787	74.4992	15.2681	3.35242	2.01728	-0.169963	2.18724	ANKRD13A	chr12:110459105:+;chr12:110459136:+	chr12_110021299_+;chr12_110021330_+
chr11:66443991-66444117:mpeak_15128|chr11_66433049_66445392_RBM4B_NM_-|	38.5784	1.90997	0.856133	2.23093	0.0256856	0.296031	11.0967	9.78805	1.13987	6.35534	3.07848	36.6191	85.9173	63.8326	87.9156	80.0405	17.0437	4.56178	1.56693	-0.334637	1.90157	RBM4B	chr11:66444003:-;chr11:66444066:-	-
chr11:48168452-48168524:mpeak_14333|chr11_48002109_48188755_PTPRJ_NM_+|	41.4974	1.6577	0.728588	2.27523	0.0228921	0.282859	9.98703	5.43781	6.83921	6.35534	6.15696	28.8514	47.8527	121.966	95.3301	86.1975	20.1095	6.37625	0.257771	-1.39933	1.6571	PTPRJ	chr11:48168516:+	-
chr11:31470994-31471092:mpeak_13863|chr11_31454115_31531175_IMMP1L_NM_-|	74.9198	2.27769	0.708013	3.21701	0.00129533	0.126212	14.4257	6.52537	1.13987	5.29612	3.69418	87.664	122.894	167.561	162.061	177.936	9.95025	1.99586	1.63333	-0.68439	2.31772	IMMP1L	chr11:31470999:-;chr11:31471042:-	chr11_31449495_-
chr11:102951029-102951167:mpeak_16260|chr11_102933143_102962944_DCUN1D5_NM_-|	57.9079	2.25668	0.837266	2.6953	0.00703258	0.203115	7.76769	5.43781	2.27974	1.05922	2.46279	72.1286	103.318	109.427	144.054	131.143	7.52678	1.50842	1.77154	-0.547456	2.319	DCUN1D5	chr11:102951025:-;chr11:102951101:-;chr11:102951134:-	chr11_103080286_-;chr11_103080387_-
chr10:95266739-95266818:mpeak_11607|chr10_95256368_95287706_CEP55_NM_+|	32.3823	4.33585	1.1943	3.63045	0.000282932	0.0696003	7.76769	3.26268	1.13987	0	1.23139	36.6191	17.401	88.9097	105.922	61.5696	20.419	0.924822	2.80272	-1.66188	4.46459	CEP55	chr10:95266799:+	-
chr10:16858660-16858716:mpeak_9492|chr10_16635495_16859453_RSU1_NM_-|	60.7053	2.86423	0.991523	2.88872	0.00386809	0.183069	2.21934	11.9632	3.4196	1.05922	0	94.322	113.106	127.665	119.692	133.606	6.83731	1.17566	2.24788	-0.292078	2.53996	RSU1	chr10:16858658:-	chr10_16816661_-
chr10:128608784-128608884:mpeak_12877|chr10_128593977_129249595_DOCK1_NM_+|	6.55197	2.77352	1.38465	2.00305	0.0451716	NA	8.87736	16.3134	5.69934	2.11845	6.15696	0	5.43781	9.11895	3.17767	8.61975	463.253	66.8125	1.43504	-1.35857	2.79361	DOCK1	chr10:128608883:+	chr10_126920326_+
chr1:6931967-6932115:mpeak_326|chr1_6845383_6947713_CAMTA1_NR_+mpeak_326|chr1_6845383_7826518_CAMTA1_NM_+||	57.5888	1.36326	0.634206	2.14955	0.0315909	0.318594	67.6899	95.7054	78.6509	123.929	97.28	5.54835	14.1383	35.3359	24.3621	33.2476	829.98	322.619	-0.290961	-1.65421	1.36325	CAMTA1	chr1:6932023:+;chr1:6932080:+;chr1:6932109:+	chr1_6871981_+;chr1_6872045_+
chr1:45862875-45862937:mpeak_2281|chr1_45811230_45956840_TESK2_NM_-|	3.68028	5.32954	2.2878	2.32955	0.01983	NA	3.32901	10.8756	3.4196	2.11845	0	1.10967	0	2.27974	10.5922	3.07848	1280.08	34.7203	1.94387	-3.26043	5.2043	TESK2	chr1:45862878:-	chr1_45397207_-
chr1:35816823-35816893:mpeak_1696|chr1_35734567_35885070_ZMYM4_NM_+|	52.0274	1.85793	0.871932	2.13082	0.0331041	0.326835	6.65802	4.35024	1.13987	0	3.07848	89.8833	97.8805	96.8888	117.574	102.821	5.86283	1.32952	1.9688	-0.171893	2.14069	ZMYM4	chr1:35816892:+	-
chr1:26160479-26160549:mpeak_1202|chr1_26158649_26185949_AUNIP_NM_-|	13.5711	3.70315	1.67628	2.20915	0.0271643	0.301856	17.7547	25.0139	25.0771	36.0136	22.1651	0	0	1.13987	4.2369	4.30987	#DIV/0!	859.491	-0.376035	-Inf	Inf	AUNIP	chr1:26160497:-	chr1_25833953_-;chr1_25834006_-;chr1_25834064_-
chr1:227965213-227965371:mpeak_8388|chr1_227922696_227968227_SNAP47_NM_+|	31.8209	1.93355	0.89121	2.16958	0.0300384	0.314668	6.65802	8.70049	5.69934	3.17767	0	47.7158	55.4656	53.5738	76.2641	60.9539	14.885	4.65272	1.37585	-0.301854	1.67771	SNAP47	chr1:227965318:+;chr1:227965351:+	-
chr1:172520685-172520865:mpeak_6569|chr1_172501488_172578955_SUCO_NM_+|	504.965	0.988193	0.497938	1.98457	0.0471923	0.380107	110.967	68.5163	52.4339	68.8495	80.6562	581.467	855.911	850.342	1282.72	1097.79	12.4869	6.25036	0.414888	-0.583511	0.998399	SUCO	chr1:172520793:+;chr1:172520866:+	chr1_172551620_+;chr1_172551722_+
chr1:155233445-155233543:mpeak_5816|chr1_155233191_155243320_CLK2_NM_-|	50.6951	4.81975	1.36486	3.53131	0.000413509	0.0867949	7.76769	6.52537	1.13987	0	0	84.335	83.7422	71.8117	145.114	106.515	8.50387	0.352419	4.23334	-0.359416	4.59275	CLK2	chr1:155233462:-	-
chr1:117599050-117599153:mpeak_4452|chr1_117569408_117602112_LOC101929099_NR_-|	12.6378	2.09845	0.875061	2.39806	0.0164821	NA	11.0967	10.8756	9.11895	6.35534	3.69418	9.98703	8.70049	28.4967	15.8884	22.1651	117.577	28.803	0.781914	-1.2474	2.02932	LOC101929099	chr1:117599048:-;chr1:117599096:-	chr1_117056428_-;chr1_117056475_-
chrX:100872520-100872581:mpeak_87958|chrX_100870750_100872991_ARMCX6_NR_-mpeak_87958|chrX_100871756_100872991_ARMCX6_NM_-||	5.73497	3.56735	1.4711	2.42496	0.0153102	NA	15.5354	10.8756	5.69934	4.2369	4.30987	0	2.17512	5.69934	6.35534	2.46279	1214.23	98.1308	1.47553	-2.15366	3.62919	ARMCX6	-	chrX_101617530_-
chr9:37836593-37836846:mpeak_83614|chr9_37800550_37861136_DCAF10_NM_+|	109.753	1.24963	0.593154	2.10675	0.0351391	0.335549	11.0967	21.7512	3.4196	5.29612	10.4668	190.863	225.125	209.736	212.904	206.874	7.89636	3.0472	1.36097	-0.0127318	1.3737	DCAF10	-	chr9_37836647_+;chr9_37836755_+
chr9:111752997-111753061:mpeak_84910|chr9_111705151_111775874_CTNNAL1_NM_-|	37.3863	1.58603	0.556444	2.8503	0.00436787	0.190925	38.8385	44.59	31.9163	31.7767	38.7889	15.5354	23.9263	55.8535	55.0796	37.5575	211.416	69.0157	0.288205	-1.32688	1.61509	CTNNAL1	-	chr9_108990731_-
chr8:73950981-73951034:mpeak_80753|chr8_73921096_73958195_TERF1_NM_+|	46.4066	2.83357	0.813762	3.48206	0.000497572	0.0881029	13.316	8.70049	1.13987	0	3.07848	79.8963	84.8298	82.0705	97.4486	93.5858	13.3655	1.54459	2.9688	-0.144424	3.11322	TERF1	-	chr8_73038784_+
chr7:99500836-99500886:mpeak_77492|chr7_99490369_99517223_TRIM4_NM_-|	13.0871	2.47955	1.09376	2.26699	0.0233905	NA	8.87736	4.35024	3.4196	3.17767	0	13.316	19.5761	20.5176	31.7767	25.8592	40.2151	8.44142	1.58857	-0.663607	2.25218	TRIM4	-	chr7_99903175_-
chr7:35872400-35872466:mpeak_75979|chr7_35840595_35943863_SEPT7_NM_+|	233.111	0.835417	0.416245	2.00703	0.0447465	0.369955	122.064	72.8666	68.3921	65.6719	67.7266	298.501	380.646	362.478	473.473	419.289	28.7022	16.0759	0.535062	-0.301204	0.836266	SEPT7	-	chr7_35832841_+
chr7:17914579-17914698:mpeak_75577|chr7_17833916_17980131_SNX13_NM_-|	20.2961	2.74101	1.01056	2.71236	0.00668053	0.203115	6.65802	6.52537	1.13987	3.17767	0	28.8514	36.9771	41.0353	39.1913	39.4046	20.0269	3.60904	2.1954	-0.276846	2.47225	SNX13	-	chr7_17874972_-
chr7:138943301-138943381:mpeak_78610|chr7_138916230_138982532_UBN2_NM_+|	87.7975	1.10075	0.511759	2.15091	0.0314835	0.318402	17.7547	28.2766	11.3987	12.7107	12.3139	158.683	135.945	193.778	140.877	166.238	15.6235	7.27168	0.922717	-0.180644	1.10336	UBN2	-	chr7_139258604_+
chr6:160464171-160464322:mpeak_74785|chr6_160390130_160525705_IGF2R_NM_+|	122.609	1.108	0.49989	2.21648	0.0266587	0.300564	52.1545	52.2029	19.3778	19.066	25.2435	166.451	286.029	204.036	226.674	174.858	23.0635	10.517	1.29742	0.164525	1.13289	IGF2R	-	chr6_160043287_+
chr6:136590272-136590491:mpeak_73954|chr6_136582253_136610989_BCLAF1_NM_-|	202.515	1.32621	0.476471	2.7834	0.0053793	0.197157	25.5224	25.0139	17.098	7.41457	8.61975	381.727	370.858	361.338	389.794	437.76	6.71503	2.78682	1.19404	-0.0747296	1.26877	BCLAF1	-	chr6_136269238_-
chr5:78602224-78602289:mpeak_67310|chr5_78531924_78617428_JMY_NM_+|	45.3119	1.28326	0.600355	2.1375	0.0325571	0.324138	23.3031	10.8756	7.97908	7.41457	7.38836	68.7996	82.6546	82.0705	75.2049	87.4289	22.567	9.31001	1.17017	-0.107195	1.27736	JMY	-	chr5_79306460_+
chr5:60241068-60241261:mpeak_66673|chr5_60240955_60448530_NDUFAF2_NM_+|	65.0545	1.52875	0.69006	2.21539	0.026733	0.3006	21.0837	6.52537	10.2588	7.41457	4.30987	82.1156	106.581	133.365	144.054	134.837	14.6315	5.33242	0.913702	-0.542511	1.45621	NDUFAF2	-	chr5_60945467_+
chr5:36995758-36995910:mpeak_66232|chr5_36876860_37063891_NIPBL_NM_+|	84.9674	1.2952	0.644361	2.01006	0.0444252	0.369011	14.4257	17.401	6.83921	7.41457	4.92557	126.502	202.286	144.763	132.403	192.713	9.67998	4.08176	1.31565	0.0698337	1.24581	NIPBL	-	chr5_36995769_+
chr5:34950311-34950453:mpeak_66155|chr5_34929697_34954657_DNAJC21_NM_+|	85.7804	2.24164	0.769367	2.91362	0.00357269	0.18265	4.43868	13.0507	0	3.17767	3.69418	145.367	126.157	163.001	208.667	190.25	6.44121	1.22293	1.93267	-0.464319	2.39699	DNAJC21	-	chr5_34950256_+;chr5_34950281_+
chr5:169021586-169021689:mpeak_69705|chr5_169010637_169031063_SPDL1_NM_+|	35.5007	2.16437	0.794487	2.72424	0.00644498	0.200035	6.65802	9.78805	2.27974	5.29612	4.92557	29.9611	42.4149	59.2732	106.982	87.4289	22.7231	4.92796	0.980613	-1.22448	2.2051	SPDL1	-	chr5_169594643_+
chr5:137520773-137520894:mpeak_68779|chr5_137514416_137522784_KIF20A_NM_+|	73.6368	1.01588	0.466893	2.17583	0.0295681	0.311575	68.7996	58.7283	68.3921	48.7243	80.6562	39.9481	58.7283	102.588	106.982	102.821	129.238	63.3093	-0.0480676	-1.07761	1.02955	KIF20A	-	chr5_138185111_+;chr5_138185195_+
chr5:118809604-118809718:mpeak_68170|chr5_118788137_118877599_HSD17B4_NM_+|	314.778	0.771558	0.322363	2.39344	0.016691	0.247105	714.628	567.707	498.122	421.571	440.223	81.0059	98.9681	109.427	105.922	110.21	712.511	417.717	0.500217	-0.27017	0.770387	HSD17B4	-	chr5_119474015_+
chr4:83971023-83971133:mpeak_63577|chr4_83956238_83996449_COPS4_NM_+|	52.8903	1.50378	0.576795	2.60713	0.0091304	0.206791	12.2064	20.6637	5.69934	5.29612	8.00405	88.7736	88.0924	93.4692	99.567	107.131	18.5847	6.32964	1.37577	-0.178147	1.55392	COPS4	-	chr4_83049910_+;chr4_83049978_+
chr4:37831573-37831633:mpeak_62560|chr4_37828281_37863130_PGM2_NM_+|	98.0742	1.48465	0.646604	2.29608	0.0216716	0.276357	12.2064	8.70049	5.69934	0	5.54127	170.889	192.498	193.778	205.489	185.94	5.75332	1.92079	1.48022	-0.102476	1.5827	PGM2	-	chr4_37830024_+
chr4:109543926-109544118:mpeak_64192|chr4_109541721_109551176_RPL34_NM_+|	54.5493	1.80005	0.796627	2.25959	0.0238468	0.286867	9.98703	10.8756	5.69934	2.11845	1.84709	84.335	121.807	110.567	124.988	73.2679	10.1205	3.12958	1.69506	0.001817	1.69324	RPL34	-	chr4_108622886_+
chr3:9422239-9422312:mpeak_56289|chr3_9404716_9426207_THUMPD3_NM_+|	94.1688	1.49203	0.659282	2.26311	0.0236291	0.285479	9.98703	7.61293	4.55947	4.2369	2.46279	162.012	177.272	183.519	206.549	183.477	5.18738	1.96308	1.22944	-0.172449	1.40189	THUMPD3	-	chr3_9380628_+
chr3:3179007-3179147:mpeak_56191|chr3_3168599_3189589_TRNT1_NM_+|	97.9122	0.999139	0.431834	2.31371	0.0206837	0.269571	29.9611	25.0139	15.9582	19.066	17.2395	136.489	164.222	186.938	185.364	198.87	18.2817	9.15025	0.65793	-0.340585	0.998515	TRNT1	-	chr3_3137425_+
chr3:122255807-122255935:mpeak_59224|chr3_122247590_122283523_PARP9_NM_-|	16.7857	2.40998	1.06146	2.27043	0.0231816	0.283532	7.76769	7.61293	3.4196	0	4.30987	16.6451	20.6637	23.9372	58.2573	25.2435	41.2253	7.19436	1.57763	-0.940958	2.51859	PARP9	-	chr3_122536961_-
chr2:232329038-232329095:mpeak_50845|chr2_232319978_232329205_NCL_NM_-|	1103.28	0.924043	0.466803	1.97952	0.047758	0.383427	150.915	90.2676	91.1895	62.4942	52.9499	1807.65	2245.81	1889.9	2341.94	2299.63	5.95004	3.16366	0.808015	-0.103289	0.911304	NCL	-	chr2_231464334_-
chr2:220100425-220100522:mpeak_50558|chr2_220094478_220101043_ANKZF1_NM_+|	46.2667	3.24221	1.01321	3.19993	0.00137459	0.126212	8.87736	7.61293	0	0	1.84709	87.664	91.3551	92.3293	91.0933	81.8876	9.21147	0.6962	3.74325	0.0173959	3.72586	ANKZF1	-	chr2_219235754_+
chr2:202260029-202260101:mpeak_49993|chr2_202245941_202316319_TRAK2_NM_-|	93.8773	2.5341	0.777859	3.25779	0.00112284	0.123021	5.54835	8.70049	3.4196	2.11845	1.23139	117.625	144.646	227.974	210.786	216.725	5.43288	1.03274	1.6587	-0.736542	2.39524	TRAK2	-	chr2_201395320_-
chr2:160229497-160229602:mpeak_48903|chr2_160176929_160473112_BAZ2B_NM_-|	43.3623	2.113	0.849737	2.48666	0.012895	0.223847	19.9741	7.61293	2.27974	6.35534	1.23139	73.2382	90.2676	58.1333	81.5602	92.9701	16.8722	4.24066	2.06834	0.0760586	1.99229	BAZ2B	-	chr2_159372987_-
chr2:153526737-153526900:mpeak_48801|chr2_153512912_153573975_PRPF40A_NM_-|	187.815	1.22806	0.532611	2.30573	0.0211255	0.271381	19.9741	17.401	15.9582	8.47379	8.00405	264.102	348.02	345.38	432.163	418.673	6.10583	2.71155	0.789442	-0.381627	1.17107	PRPF40A	-	chr2_152670249_-
chr2:11351811-11351977:mpeak_44902|chr2_11323566_11484711_ROCK2_NM_-|	59.1439	2.54471	0.925422	2.74979	0.0059634	0.199656	7.76769	8.70049	0	1.05922	1.84709	146.476	110.931	110.567	108.041	96.0486	6.3977	0.923646	3.08738	0.295239	2.79214	ROCK2	-	chr2_11211685_-;chr2_11211760_-
chr19:52801064-52801173:mpeak_43963|chr19_52800421_52824831_ZNF480_NM_+|	108.024	1.17772	0.570296	2.0651	0.0389133	0.349506	18.8644	9.78805	4.55947	7.41457	4.92557	210.837	236.001	202.897	188.542	196.407	6.41227	2.87484	1.34663	0.189278	1.15735	ZNF480	-	chr19_52297910_+
chr19:4423290-4423397:mpeak_40945|chr19_4402659_4442921_CHAF1A_NM_+|	65.2909	1.88974	0.619117	3.05231	0.00227089	0.159272	15.5354	27.189	12.5386	2.11845	8.00405	99.8703	98.9681	117.406	130.285	140.994	21.487	5.83018	1.49981	-0.382044	1.88185	CHAF1A	-	chr19_4423343_+;chr19_4423366_+
chr19:36944976-36945026:mpeak_42692|chr19_36940903_36980804_ZNF566_NM_-|	71.6741	2.07243	0.993877	2.0852	0.0370513	0.341801	19.9741	21.7512	4.55947	11.6515	0	145.367	117.457	135.644	95.3301	165.007	15.8758	4.09387	1.94892	-0.00637514	1.95529	ZNF566	-	chr19_36454078_-
chr19:19603378-19603498:mpeak_42074|chr19_19496641_19616152_GATAD2A_NM_+|	186.615	1.16459	0.527432	2.20804	0.0272414	0.301856	33.2901	19.5761	12.5386	4.2369	6.15696	439.429	485.052	271.289	296.583	297.997	5.71847	2.64849	1.78992	0.67946	1.11046	GATAD2A	-	chr19_19492617_+;chr19_19492664_+
chr17:45689812-45689959:mpeak_36991|chr17_45608443_45699133_NPEPPS_NM_+|	606.198	1.32209	0.620147	2.13189	0.0330157	0.326559	125.393	44.59	34.196	24.3621	21.5494	1127.43	1555.21	893.657	1071.93	1163.67	6.3364	2.55995	1.67034	0.362794	1.30755	NPEPPS	-	chr17_47612505_+
chr17:38562631-38562678:mpeak_36480|chr17_38545899_38574202_TOP2A_NM_-|	167.269	1.08847	0.513504	2.1197	0.0340318	0.330258	22.1934	18.4885	28.4967	11.6515	14.7767	186.425	228.388	376.157	409.92	376.19	9.80731	4.72567	0.151891	-0.901447	1.05334	TOP2A	-	chr17_40406420_-
chr16:89875059-89875114:mpeak_34313|chr16_89805116_89883065_FANCA_NM_-|	28.957	1.62135	0.80956	2.00275	0.0452041	0.371261	13.316	6.52537	0	5.29612	3.69418	56.5932	48.9402	62.6928	44.4874	48.0243	18.8011	5.79255	1.72704	0.0284926	1.69854	FANCA	-	chr16_89808620_-
chr16:3565505-3565578:mpeak_31072|chr16_3550944_3586121_CLUAP1_NM_+|	86.2385	1.51746	0.744487	2.03826	0.0415243	0.359212	12.2064	4.35024	4.55947	4.2369	1.84709	126.502	182.71	177.819	180.068	168.085	5.35444	2.02358	1.2224	-0.181426	1.40383	CLUAP1	-	chr16_3515556_+;chr16_3515599_+
chr15:51829816-51829963:mpeak_28722|chr15_51741390_51914967_DMXL2_NM_-|	40.1394	2.46256	0.781322	3.15179	0.00162275	0.136355	17.7547	8.70049	2.27974	2.11845	2.46279	72.1286	78.3044	79.7908	57.1981	80.6562	17.586	3.15237	2.53203	0.0521059	2.47992	DMXL2	-	chr15_51537757_-
chr14:74580884-74580990:mpeak_26484|chr14_74551655_74665624_LIN52_NM_+|	64.4957	1.53093	0.744846	2.05537	0.0398433	0.353592	11.0967	7.61293	5.69934	5.29612	0.615696	138.709	102.231	123.106	124.988	125.602	7.76528	3.10711	1.27323	-0.0482323	1.32146	LIN52	-	chr14_74114287_+
chr14:58817777-58818052:mpeak_25697|chr14_58765221_58838603_ARID4A_NM_+|	28.6009	1.55118	0.737493	2.10332	0.0354382	0.335549	42.1675	54.3781	26.217	47.6651	32.0162	7.76769	11.9632	14.8183	31.7767	17.2395	489.312	165.895	0.451565	-1.10892	1.56048	ARID4A	-	chr14_58351120_+;chr14_58351190_+;chr14_58351307_+
chr14:23520362-23520415:mpeak_24535|chr14_23516583_23526747_CDH24_NM_-|	11.6668	5.58363	1.82374	3.06164	0.00220125	NA	12.2064	0	0	0	0	18.8644	16.3134	15.9582	31.7767	21.5494	34.6991	0	Inf	-0.392899	Inf	CDH24	-	chr14_23051201_-
chr13:98671830-98671884:mpeak_23958|chr13_98605928_98673989_IPO5_NM_+|	96.1155	1.79053	0.793706	2.25591	0.0240762	0.287345	21.0837	6.52537	9.11895	0	3.69418	184.205	176.185	175.54	197.016	187.787	7.66089	2.28666	1.69248	-0.0517873	1.74427	IPO5	-	chr13_98019674_+
chr13:45589566-45589738:mpeak_23223|chr13_45563686_45601919_GPALPP1_NM_+|	24.6586	2.1081	0.976825	2.15812	0.0309188	0.317145	62.1415	18.4885	23.9372	38.1321	17.2395	8.87736	7.61293	21.6575	34.9544	13.5453	488.955	113.044	0.6088	-1.50401	2.11281	GPALPP1	-	chr13_45015587_+
chr13:34409524-34409586:mpeak_22914|chr13_34392205_34540223_RFC3_NM_+|	5.56018	5.65367	1.93868	2.91625	0.00354271	NA	4.43868	17.401	4.55947	4.2369	8.61975	0	0	6.83921	2.11845	7.38836	#DIV/0!	106.547	0.91149	-Inf	Inf	RFC3	-	chr13_33835437_+;chr13_33835468_+
chr13:34395268-34395417:mpeak_22913|chr13_34392205_34540223_RFC3_NM_+|	65.9913	4.3995	1.6413	2.6805	0.0073512	0.203115	145.367	70.6915	196.057	110.159	121.292	0	0	6.83921	2.11845	7.38836	#DIV/0!	2615.37	-0.399571	-Inf	Inf	RFC3	-	chr13_33821193_+;chr13_33821236_+
chr12:93172882-93173030:mpeak_20406|chr12_93169909_93323107_EEA1_NM_-|	72.4516	0.857994	0.424444	2.02145	0.0432327	0.365475	56.5932	47.8527	27.3568	38.1321	35.7104	82.1156	105.493	99.1685	117.574	114.52	55.6721	30.5496	0.630519	-0.23528	0.865799	EEA1	-	chr12_92779199_-
chr12:14591078-14591205:mpeak_17670|chr12_14518565_14650587_ATF7IP_NM_+|	183.682	1.1837	0.548451	2.15825	0.0309083	0.317145	36.6191	28.2766	18.2379	22.2437	18.4709	191.973	368.683	337.401	372.847	442.07	11.575	5.11599	0.723533	-0.454388	1.17792	ATF7IP	-	chr12_14438204_+
chr11:59368772-59368871:mpeak_14455|chr11_59344192_59383617_OSBP_NM_-|	54.9275	3.5131	1.28743	2.72877	0.00635714	0.200035	21.0837	1.08756	0	2.11845	0.615696	105.419	116.369	98.0287	90.034	114.52	9.99663	0.903604	3.60449	0.136815	3.46768	OSBP	-	chr11_59601323_-
chr11:4103486-4103591:mpeak_13256|chr11_3876932_4112511_STIM1_NM_+|	98.6869	1.56896	0.611179	2.5671	0.0102553	0.212605	27.7418	14.1383	10.2588	7.41457	6.15696	175.328	174.01	142.484	229.852	199.486	11.9884	4.16745	1.39843	-0.125978	1.5244	STIM1	-	chr11_4082312_+
chr11:118455184-118455375:mpeak_16674|chr11_118443101_118471339_ARCN1_NM_+|	197.877	1.01588	0.497534	2.04183	0.0411686	0.358386	145.367	156.609	120.826	100.626	137.916	150.915	234.913	238.232	423.69	269.675	78.2668	38.5755	0.333932	-0.686784	1.02072	ARCN1	-	chr11_118584515_+;chr11_118584611_+
chr10:101690500-101690611:mpeak_11894|chr10_101637093_101769676_DNMBP_NM_-|	34.1051	2.54296	0.96453	2.63648	0.00837721	0.203161	6.65802	8.70049	1.13987	0	2.46279	46.6062	77.2168	60.413	57.1981	80.6562	12.4036	1.81707	2.67687	-0.0942052	2.77107	DNMBP	-	chr10_99930694_-
chr10:112340689-112340788:mpeak_12301|chr10_112327448_112363988_SMC3_NM_+|	62.539	1.0021	0.511049	1.96086	0.0498951	0.39052	61.0319	64.1661	50.1542	48.7243	40.636	48.8255	63.0785	61.5529	113.337	73.8836	111.88	56.0809	0.428759	-0.567608	0.996367	SMC3	-	chr10_110580982_+
chr10:105761222-105761335:mpeak_12218|chr10_105726942_105785331_SLK_NM_+|	76.6986	1.43529	0.695152	2.06472	0.0389495	0.349506	37.7288	11.9632	10.2588	10.5922	12.3139	103.199	139.208	106.008	169.476	166.238	20.4994	7.50812	1.16831	-0.280742	1.44906	SLK	-	chr10_104001533_+
chr1:85131801-85131918:mpeak_3130|chr1_85113290_85156240_SSX2IP_NM_-|	54.2876	1.33929	0.621764	2.15402	0.0312387	0.31824	17.7547	14.1383	10.2588	11.6515	10.4668	53.2642	80.4795	140.204	119.692	84.9661	23.8464	9.38842	0.563229	-0.781586	1.34482	SSX2IP	-	chr1_84666119_-;chr1_84666203_-
chr1:32658833-32658910:mpeak_1543|chr1_32645344_32660502_TXLNA_NM_+|	52.0406	1.4246	0.68302	2.08574	0.0370022	0.341801	22.1934	9.78805	9.11895	2.11845	8.00405	79.8963	96.7929	86.63	112.278	93.5858	18.1004	6.57842	1.31798	-0.142228	1.46021	TXLNA	-	chr1_32193295_+
chr1:117584889-117584942:mpeak_4450|chr1_117569408_117602112_LOC101929099_NR_-|	13.877	2.12129	0.872521	2.43122	0.015048	0.236241	7.76769	21.7512	7.97908	7.41457	8.61975	9.98703	8.70049	28.4967	15.8884	22.1651	157.961	36.0832	0.882763	-1.2474	2.13017	LOC101929099	-	chr1_117042268_-
chr1:111735229-111735305:mpeak_4020|chr1_111730303_111747160_DENND2D_NM_-|	95.454	1.41207	0.656091	2.15225	0.0313777	0.318402	12.2064	10.8756	5.69934	8.47379	1.23139	179.767	176.185	205.176	180.068	174.858	6.48459	2.75031	1.16838	-0.0690466	1.23742	DENND2D	-	chr1_111192610_-
chr1:10161139-10161215:mpeak_452|chr1_10093040_10239952_UBE4B_NM_+|	48.2966	1.21048	0.568699	2.12851	0.0332946	0.326954	26.6321	27.189	4.55947	16.9476	8.61975	92.1026	82.6546	69.532	78.3826	76.3463	30.7976	13.4338	1.42209	0.225137	1.19695	UBE4B	-	chr1_10101157_+
chrX:133764173-133764231:mpeak_88484|chrX_133700770_133792513_PLAC1_NM_-|	11.4353	3.09632	1.16975	2.64699	0.00812128	NA	29.9611	30.4517	12.5386	14.8291	7.38836	0	3.26268	5.69934	5.29612	4.92557	1851.63	218.303	1.38255	-1.70184	3.08439	PLAC1	-	-
chr7:27581170-27581324:mpeak_75770|chr7_27565991_27702620_HIBADH_NM_-|	4.86406	3.99954	1.67328	2.39023	0.0168378	NA	3.32901	14.1383	1.13987	5.29612	3.07848	1.10967	1.08756	4.55947	10.5922	4.30987	794.969	48.8885	1.46142	-2.56191	4.02333	HIBADH	-	-
chr12:120428038-120428109:mpeak_21542|chr12_120427647_120530803_CCDC64_NM_+|	21.5249	2.12198	0.886139	2.39463	0.016637	0.247105	62.1415	30.4517	33.0562	23.3029	11.6982	5.54835	7.61293	13.6784	14.8291	12.9296	703.528	164.242	1.02912	-1.06966	2.09878	CCDC64	-	-
chr6:101311940-101312094:mpeak_73265|chr6_100957409_101329248_ASCC3_NM_-|	101.165	0.797352	0.397545	2.00569	0.0448894	0.370034	218.605	224.038	133.365	135.581	127.449	39.9481	27.189	37.6157	37.0728	30.7848	659.311	375.824	0.744168	-0.0667319	0.8109	ASCC3	-	-
chr14:58930671-58930732:mpeak_25716|chr14_58894102_59014498_KIAA0586_NM_+|	30.9749	2.05621	0.994732	2.0671	0.0387252	0.348768	79.8963	30.4517	60.413	15.8884	33.2476	5.54835	11.9632	33.0562	15.8884	23.3965	630.145	151.434	0.595447	-1.46155	2.05699	KIAA0586	-	-
chr12:122239619-122239785:mpeak_21723|chr12_122233632_122241390_LINC01089_NR_-|	2.81034	7.26191	2.81406	2.58058	0.00986345	NA	12.2064	0	0	0	0	0	2.17512	4.55947	4.2369	4.92557	561.181	0	Inf	-2.07235	Inf	LINC01089	-	-
chr4:41674174-41674224:mpeak_62813|chr4_41361623_41699176_LIMCH1_NM_+|	6.93659	3.96177	1.48053	2.67591	0.00745273	NA	11.0967	6.52537	7.97908	3.17767	1.84709	0	3.26268	5.69934	13.7699	16.0081	540.11	36.6539	1.02341	-2.85781	3.88121	LIMCH1	-	-
chr1:201724828-201724878:mpeak_7384|chr1_201617449_201788964_NAV1_NM_+|	3.08644	3.98977	1.86685	2.13716	0.0325846	NA	4.43868	8.70049	1.13987	2.11845	0	2.21934	1.08756	4.55947	1.05922	5.54127	397.326	29.1965	2.59664	-1.16982	3.76646	NAV1	-	-
chr1:209790744-209790804:mpeak_7806|chr1_209788752_209825820_LAMB3_NM_-|	10.5992	2.34835	1.15491	2.03337	0.0420155	NA	8.87736	8.70049	10.2588	4.2369	12.9296	3.32901	3.26268	18.2379	27.5398	8.61975	266.667	50.4166	-0.0567878	-2.45986	2.40307	LAMB3	-	-
chr9:37893685-37893735:mpeak_83642|chr9_37880745_37904350_SLC25A51_NR_-mpeak_83642|chr9_37888589_37904350_SLC25A51_NM_-||	4.6925	6.76875	1.9525	3.46671	0.000526872	NA	1.10967	11.9632	0	0	0	2.21934	4.35024	6.83921	10.5922	9.85114	198.99	0	Inf	-1.46914	Inf	SLC25A51	-	-
chr15:45723242-45723290:mpeak_28455|chr15_45722726_45725145_C15orf48_NM_+|	7.33559	3.67224	1.26833	2.89534	0.00378744	NA	6.65802	4.35024	2.27974	0	3.69418	2.21934	4.35024	12.5386	16.9476	20.318	167.564	11.9948	1.4668	-2.33743	3.80423	C15orf48	-	-
chr4:123850303-123850359:mpeak_64468|chr4_123844224_124235042_SPATA5_NM_+|	39.3712	1.50175	0.603286	2.48928	0.0128001	0.22299	57.7029	39.1522	33.0562	18.0068	30.1691	35.5095	28.2766	60.413	36.0136	55.4127	151.844	53.4987	0.83874	-0.66627	1.50501	SPATA5	-	-
chr15:85634269-85634419:mpeak_30141|chr15_85523743_85681027_PDE8A_NM_+|	44.1476	1.28597	0.526547	2.44227	0.0145952	0.231148	43.2771	45.6776	29.6366	22.2437	16.0081	42.1675	58.7283	68.3921	59.3165	56.0284	88.165	36.9487	0.974869	-0.279814	1.25468	PDE8A	-	-
chr5:72251897-72251959:mpeak_67089|chr5_72251807_72383894_FCHO2_NM_+|	10.0833	2.52388	1.0548	2.39275	0.0167225	NA	9.98703	6.52537	5.69934	1.05922	1.84709	6.65802	13.0507	23.9372	14.8291	17.2395	83.7821	15.3656	1.52516	-0.921779	2.44693	FCHO2	-	-
chrX:67649987-67650041:mpeak_87525|chrX_67267005_67653299_OPHN1_NM_-|	5.20271	4.08572	1.8077	2.26017	0.0238105	NA	6.65802	6.52537	0	1.05922	0	7.76769	8.70049	5.69934	13.7699	1.84709	80.0537	4.96907	4.2226	0.212684	4.00992	OPHN1	-	-
chr3:16312529-16312585:mpeak_56731|chr3_16306666_16344914_OXNAD1_NM_+|	49.0965	1.16595	0.556123	2.09658	0.0360312	0.33753	49.9352	27.189	34.196	19.066	24.0122	48.8255	55.4656	67.2522	79.4418	85.5818	73.9509	33.2683	0.582159	-0.57026	1.15242	OXNAD1	-	-
chr14:58930842-58930907:mpeak_25717|chr14_58894102_59014498_KIAA0586_NM_+|	10.5168	3.27695	1.59463	2.05499	0.0398796	NA	11.0967	0	1.13987	0	3.07848	5.54835	11.9632	33.0562	15.8884	23.3965	63.368	5.8312	1.98034	-1.46155	3.44189	KIAA0586	-	-
chr11:106695444-106695579:mpeak_16304|chr11_106558482_106889171_GUCY1A2_NM_-|	62.5034	1.95221	0.555035	3.51727	0.000436004	0.0867949	18.8644	21.7512	19.3778	24.3621	24.0122	25.5224	43.5024	119.686	164.18	163.775	58.842	15.1354	-0.153268	-2.11219	1.95892	GUCY1A2	-	-
chr12:51845954-51846051:mpeak_18865|chr12_51785100_51901209_SLC4A8_NM_+|	12.3982	1.90466	0.963212	1.97741	0.0479954	NA	12.2064	7.61293	4.55947	4.2369	1.23139	16.6451	17.401	22.7974	24.3621	12.9296	58.2132	16.6881	1.56787	-0.234655	1.80252	SLC4A8	-	-
chr13:103441359-103441449:mpeak_24057|chr13_103436862_103451404_KDELC1_NM_-|	11.1175	2.13668	1.00906	2.1175	0.0342172	NA	9.98703	6.52537	2.27974	4.2369	1.23139	12.2064	17.401	14.8183	26.4806	16.0081	55.7713	13.5202	1.67661	-0.367793	2.04441	KDELC1	-	-
chr1:40033421-40033527:mpeak_1978|chr1_40026794_40042521_PABPC4_NM_-|	83.4544	1.38463	0.693491	1.99661	0.0458673	0.373333	64.3609	40.2398	30.7764	13.7699	42.483	71.0189	129.42	124.246	174.772	143.457	52.1859	19.6688	0.85028	-0.557472	1.40775	PABPC4	-	-
chr14:51221458-51221594:mpeak_25312|chr14_51190390_51297839_NIN_NM_-|	24.0872	1.34287	0.653752	2.0541	0.0399664	0.353729	14.4257	17.401	6.83921	7.41457	9.23544	24.4127	39.1522	44.4549	38.1321	39.4046	50.0696	19.2548	1.0232	-0.355515	1.37872	NIN	-	-
chr7:77398059-77398127:mpeak_77004|chr7_77325742_77407846_RSBN1L_NM_+|	33.7352	1.58544	0.614008	2.58212	0.00981951	0.209975	22.1934	19.5761	11.3987	5.29612	10.4668	52.1545	38.0646	49.0143	68.8495	60.3382	46.2978	15.242	1.20584	-0.397046	1.60289	RSBN1L	-	-
chr6:101253628-101253684:mpeak_73257|chr6_100957409_101329248_ASCC3_NM_-|	21.6494	1.72769	0.716446	2.41147	0.0158882	0.244179	17.7547	11.9632	4.55947	5.29612	4.30987	39.9481	27.189	37.6157	37.0728	30.7848	44.2645	13.4304	1.65392	-0.0667319	1.72065	ASCC3	-	-
chr19:59077293-59077351:mpeak_44613|chr19_59070552_59084283_MZF1-AS1_NR_+|	19.871	1.78773	0.889664	2.00944	0.0444904	0.369066	18.8644	6.52537	4.55947	3.17767	4.30987	41.0578	19.5761	36.4758	37.0728	27.0906	41.8739	11.9705	1.66053	-0.146034	1.80657	MZF1-AS1	-	-
chr5:77536698-77536764:mpeak_67276|chr5_77298879_77590579_AP3B1_NM_-|	22.053	1.62158	0.824116	1.96766	0.0491075	0.388294	17.7547	11.9632	5.69934	5.29612	2.46279	26.6321	50.0278	25.0771	42.369	33.2476	38.7659	13.3655	1.7278	0.191534	1.53627	AP3B1	-	-
chr12:53553889-53553944:mpeak_18992|chr12_53552468_53574693_CSAD_NM_-|	12.3006	3.33085	1.38946	2.39723	0.0165197	NA	9.98703	5.43781	0	0	1.84709	29.9611	10.8756	11.3987	30.7175	22.7808	37.772	2.84619	3.64689	-0.0833212	3.73021	CSAD	-	-
chr18:39593398-39593460:mpeak_40038|chr18_39535162_39661086_PIK3C3_NM_+|	18.958	3.89147	1.26468	3.07703	0.00209074	0.154672	14.4257	7.61293	2.27974	0	0.615696	14.4257	44.59	22.7974	43.4282	39.4046	37.3437	2.74111	3.51315	-0.254887	3.76803	PIK3C3	-	-
chr16:53922741-53922865:mpeak_32775|chr16_53737874_54145673_FTO_NM_+|	27.4828	3.72262	1.14044	3.26419	0.00109779	0.123021	25.5224	6.52537	2.27974	0	1.84709	25.5224	60.9034	51.2941	38.1321	62.801	37.0813	2.71097	3.54208	-0.231729	3.77381	FTO	-	-
chr7:129838037-129838207:mpeak_78381|chr7_129806345_129845338_TMEM209_NM_-|	18.1877	1.8856	0.854164	2.20754	0.0272763	0.301856	8.87736	9.78805	4.55947	1.05922	4.30987	33.2901	17.401	29.6366	36.0136	36.9418	36.8219	9.67773	1.49567	-0.432151	1.92782	TMEM209	-	-
chrX:24225864-24225983:mpeak_86840|chrX_24167761_24228309_ZFX_NM_+|	92.9157	1.10251	0.505423	2.18137	0.0291563	0.310604	71.0189	41.3273	26.217	23.3029	24.6279	134.27	172.922	118.546	179.009	137.916	36.572	17.027	1.18444	0.0815277	1.10291	ZFX	-	-
chr5:56231250-56231315:mpeak_66610|chr5_56219412_56247957_MIER3_NM_-|	26.1621	1.67826	0.826665	2.03016	0.0423405	0.36249	13.316	13.0507	1.13987	4.2369	9.85114	28.8514	43.5024	38.7555	57.1981	51.7185	36.4414	10.312	1.37697	-0.444293	1.82126	MIER3	-	-
chr8:101240367-101240417:mpeak_81508|chr8_101170262_101253118_SPAG1_NM_+|	11.0144	5.35387	1.69008	3.16782	0.00153586	NA	1.10967	13.0507	0	0	0	14.4257	25.0139	19.3778	13.7699	23.3965	35.904	0	Inf	0.0652309	Inf	SPAG1	-	-
chr20:60584100-60584169:mpeak_53413|chr20_60551391_60640866_TAF4_NM_-|	10.3554	2.54457	1.22549	2.07636	0.0378604	NA	2.21934	8.70049	1.13987	2.11845	0.615696	11.0967	19.5761	13.6784	22.2437	22.1651	35.601	6.66931	2.08001	-0.336297	2.41631	TAF4	-	-
chr9:35698030-35698150:mpeak_83502|chr9_35697913_35732392_TLN1_NM_-|	18.3842	1.64769	0.824056	1.99949	0.0455556	0.371979	7.76769	11.9632	4.55947	1.05922	4.92557	22.1934	33.7144	28.4967	32.8359	36.3261	35.2918	10.7971	1.48896	-0.219737	1.70869	TLN1	-	-
chr5:112221791-112221864:mpeak_67999|chr5_112196884_112227299_SRP19_NM_+|	41.4829	1.63599	0.585809	2.79269	0.0052271	0.197157	27.7418	19.5761	5.69934	6.35534	10.4668	59.9222	75.0417	61.5529	75.2049	73.2679	35.0596	10.7232	1.65604	-0.0530292	1.70907	SRP19	-	-
chr1:24971810-24971868:mpeak_1137|chr1_24969593_24998672_SRRM1_NM_+|	35.9973	1.47112	0.695682	2.11464	0.0344609	0.33174	15.5354	14.1383	5.69934	15.8884	5.54127	35.5095	52.2029	71.8117	78.3826	65.2638	33.8307	12.5913	0.714312	-0.711592	1.4259	SRRM1	-	-
chr5:169014330-169014382:mpeak_69701|chr5_169010637_169031063_SPDL1_NM_+|	36.2994	2.76674	0.797974	3.46721	0.000525888	0.0909189	7.76769	16.3134	3.4196	6.35534	3.07848	29.9611	42.4149	59.2732	106.982	87.4289	33.2722	5.06672	1.49071	-1.22448	2.7152	SPDL1	-	-
chr10:95220033-95220161:mpeak_11602|chr10_95066758_95242074_MYOF_NM_-|	30.8737	1.76973	0.818565	2.16199	0.0306193	0.316676	23.3031	15.2259	3.4196	4.2369	5.54127	39.9481	76.1293	39.8954	67.7903	33.2476	33.1924	9.36455	2.13061	0.305037	1.82557	MYOF	-	-
chr2:99797282-99797339:mpeak_47495|chr2_99785933_99797492_MITD1_NM_-|	16.2163	2.1707	0.939983	2.3093	0.0209272	0.271025	4.43868	6.52537	4.55947	1.05922	2.46279	15.5354	18.4885	29.6366	33.8952	45.5615	32.2245	7.40787	1.02505	-1.09598	2.12103	MITD1	-	-
chr8:68204075-68204176:mpeak_80692|chr8_68111333_68255912_ARFGEF1_NM_-|	27.3575	2.64803	1.14343	2.31586	0.0205659	0.269252	15.5354	15.2259	7.97908	0	0	41.0578	56.5532	37.6157	61.435	38.1732	31.5141	5.81465	2.53178	0.0935471	2.43824	ARFGEF1	-	-
chr5:128889210-128889265:mpeak_68388|chr5_128796102_129072759_ADAMTS19_NM_+|	27.6675	2.70205	0.795572	3.39636	0.000682884	0.0970503	12.2064	8.70049	3.4196	2.11845	3.07848	24.4127	42.4149	58.1333	55.0796	67.1109	31.2848	4.77837	1.86376	-0.847111	2.71087	ADAMTS19	-	-
chr5:137353986-137354044:mpeak_68770|chr5_137276037_137368802_FAM13B_NM_-|	16.1348	5.7511	1.41033	4.07785	4.54535e-05	0.0370855	8.87736	8.70049	0	0	0	33.2901	23.9263	25.0771	23.3029	38.1732	30.7217	0	Inf	-0.0121945	Inf	FAM13B	-	-
chr14:68103914-68103964:mpeak_26095|chr14_68086578_68117431_ARG2_NM_+|	19.323	2.85614	1.2058	2.36868	0.0178517	0.253162	12.2064	0	2.27974	2.11845	1.23139	25.5224	16.3134	38.7555	45.5466	49.2557	29.1768	4.21508	1.7015	-1.08969	2.79119	ARG2	-	-
chr1:24988364-24988414:mpeak_1142|chr1_24969593_24998672_SRRM1_NM_+|	34.2825	2.24081	0.884351	2.53384	0.011282	0.219841	18.8644	6.52537	4.55947	8.47379	1.23139	35.5095	52.2029	71.8117	78.3826	65.2638	28.9466	6.62062	1.41676	-0.711592	2.12836	SRRM1	-	-
chr1:154151930-154152078:mpeak_5687|chr1_154130197_154155725_TPM3_NR_-mpeak_5687|chr1_154131524_154164611_TPM3_NM_-||	30.8759	1.72082	0.688936	2.49779	0.0124969	0.221796	9.98703	14.1383	7.97908	5.29612	3.69418	43.2771	40.2398	62.6928	70.968	50.4871	28.8868	9.21508	1.09258	-0.555762	1.64834	TPM3	-	-
chr11:106698009-106698256:mpeak_16310|chr11_106558482_106889171_GUCY1A2_NM_-|	56.597	2.14162	0.657626	3.25659	0.00112759	0.123021	8.87736	10.8756	11.3987	9.53301	8.61975	25.5224	43.5024	119.686	164.18	163.775	28.6172	6.60159	0.00380369	-2.11219	2.116	GUCY1A2	-	-
chr1:59002179-59002287:mpeak_2664|chr1_58946846_59012471_OMA1_NM_-|	15.5974	2.72975	1.07424	2.54109	0.0110507	0.219046	11.0967	4.35024	0	1.05922	1.84709	31.0708	25.0139	26.217	23.3029	32.0162	27.5422	3.56445	2.99502	0.0451302	2.94989	OMA1	-	-
chr14:76452738-76452871:mpeak_26612|chr14_76452095_76550105_IFT43_NR_+mpeak_26612|chr14_76452095_76549800_IFT43_NM_+||	31.4922	2.10038	0.790681	2.65642	0.00789742	0.203115	16.6451	10.8756	7.97908	4.2369	0.615696	48.8255	51.1154	56.9934	60.3758	57.2598	27.5369	7.34796	1.68577	-0.220183	1.90595	IFT43	-	-
chr5:86674316-86674364:mpeak_67501|chr5_86564069_86686616_RASA1_NM_+|	18.672	3.98065	1.36465	2.91697	0.0035345	0.18265	6.65802	8.70049	2.27974	0	0	16.6451	42.4149	31.9163	49.7835	28.322	26.005	2.07208	3.33706	-0.312576	3.64964	RASA1	-	-
chr12:57686403-57686464:mpeak_19473|chr12_57648896_57704246_R3HDM2_NM_-|	153.757	1.18423	0.482903	2.4523	0.0141945	0.229534	57.7029	64.1661	30.7764	34.9544	30.7848	231.921	239.263	258.75	382.38	206.874	25.8644	11.3815	0.921459	-0.262816	1.18427	R3HDM2	-	-
chr9:116034701-116034793:mpeak_85112|chr9_116029719_116037869_CDC26_NM_-|	22.592	1.8566	0.904482	2.05267	0.0401046	0.353897	9.98703	5.43781	1.13987	1.05922	6.15696	29.9611	31.5393	36.4758	56.1389	48.0243	25.0809	5.94149	1.46932	-0.608367	2.07769	CDC26	-	-
chr12:101705503-101705582:mpeak_20679|chr12_101673904_101779745_UTP20_NM_+|	14.2022	2.85545	1.16467	2.45173	0.014217	0.229534	5.54835	6.52537	3.4196	0	0	22.1934	26.1015	21.6575	30.7175	25.8592	25	4.37098	2.40493	-0.110967	2.5159	UTP20	-	-
chr1:89298376-89298539:mpeak_3233|chr1_89149921_89298927_PKN2_NM_+|	49.5156	1.82165	0.86365	2.10924	0.0349238	0.335002	32.1804	9.78805	1.13987	7.41457	9.23544	106.528	61.991	91.1895	85.7971	89.8917	24.9043	6.66592	1.82321	-0.0783051	1.90152	PKN2	-	-
chr17:35307537-35307711:mpeak_36205|chr17_35306174_35413900_AATF_NM_+|	104.534	0.95706	0.487197	1.96442	0.0494812	0.38908	53.2642	34.802	25.0771	16.9476	21.5494	188.644	182.71	183.519	203.371	135.453	23.7149	12.1709	1.05511	0.0927612	0.962351	AATF	-	-
chr5:128844717-128844937:mpeak_68383|chr5_128796102_129072759_ADAMTS19_NM_+|	26.8979	2.62023	0.982784	2.66613	0.0076729	0.203115	13.316	2.17512	1.13987	2.11845	3.07848	24.4127	42.4149	58.1333	55.0796	67.1109	23.1808	3.51412	1.87458	-0.847111	2.72169	ADAMTS19	-	-
chr7:110907258-110907312:mpeak_78010|chr7_110303777_111202573_IMMP2L_NM_-|	15.6767	5.48401	1.5071	3.63879	0.000273917	0.0696003	8.87736	2.17512	0	0	0	17.7547	30.4517	23.9372	36.0136	37.5575	22.9274	0	Inf	-0.431337	Inf	IMMP2L	-	-
chr13:52991185-52991278:mpeak_23571|chr13_52990058_53024813_VPS36_NM_-|	49.2675	2.33998	0.9297	2.51692	0.0118385	0.220256	16.6451	10.8756	12.5386	3.17767	0.615696	53.2642	67.4288	110.567	112.278	105.284	22.8022	4.97729	1.33778	-0.857959	2.19574	VPS36	-	-
chr11:106697833-106697888:mpeak_16309|chr11_106558482_106889171_GUCY1A2_NM_-|	54.073	3.70967	1.12984	3.28335	0.00102582	0.121757	12.2064	3.26268	7.97908	0	0.615696	25.5224	43.5024	119.686	164.18	163.775	22.4108	1.92001	1.43282	-2.11219	3.54501	GUCY1A2	-	-
chr1:52861959-52862046:mpeak_2519|chr1_52839047_52870143_ORC1_NM_-|	25.9079	2.88487	0.963701	2.99353	0.00275769	0.172375	5.54835	8.70049	3.4196	0	1.84709	28.8514	35.8895	39.8954	75.2049	59.7225	22.009	3.01259	2.02084	-0.848181	2.86902	ORC1	-	-
chr21:22696698-22696833:mpeak_53760|chr21_22370632_22910166_NCAM2_NM_+|	33.6902	1.76522	0.807149	2.18699	0.0287436	0.30984	5.54835	13.0507	6.83921	5.29612	2.46279	44.3868	42.4149	74.0914	91.0933	51.7185	21.4271	6.73024	0.934412	-0.736294	1.67071	NCAM2	-	-
chr17:49297681-49297730:mpeak_37269|chr17_49258055_49337427_MBTD1_NM_-|	20.265	3.68381	1.2289	2.99764	0.00272076	0.172375	8.87736	7.61293	2.27974	0	0	44.3868	32.6268	39.8954	34.9544	32.0162	21.4122	2.13327	3.43964	0.112346	3.32729	MBTD1	-	-
chr9:101900138-101900231:mpeak_84674|chr9_101867370_101911461_TGFBR1_NM_+|	67.9843	2.18539	0.659198	3.31523	0.000915689	0.111128	9.98703	17.401	6.83921	5.29612	9.85114	69.9092	61.991	123.106	167.357	208.105	20.7642	4.40992	0.901891	-1.33338	2.23527	TGFBR1	-	-
chr14:73833592-73833683:mpeak_26385|chr14_73744001_73925286_NUMB_NM_-|	88.5298	1.37812	0.533537	2.58299	0.00979471	0.209975	35.5095	21.7512	15.9582	7.41457	16.0081	138.709	140.295	158.442	199.134	152.077	20.5232	7.72699	1.12501	-0.284265	1.40928	NUMB	-	-
chr10:127516705-127516819:mpeak_12851|chr10_127512103_127541693_BCCIP_NM_+|	16.4469	3.53056	1.33122	2.65212	0.00799877	0.203115	5.54835	5.43781	0	0	1.23139	18.8644	35.8895	26.217	34.9544	36.3261	20.0646	1.263	3.74229	-0.24744	3.98973	BCCIP	-	-
chr2:44402774-44402869:mpeak_45916|chr2_44395941_44459454_PPM1B_NM_+|	30.8324	2.98383	0.94463	3.15873	0.00158459	0.135835	3.32901	11.9632	3.4196	1.05922	1.23139	43.2771	33.7144	54.7137	80.501	75.1149	19.8622	2.71489	2.00614	-0.864918	2.87106	PPM1B	-	-
chr3:112280299-112280357:mpeak_58880|chr3_112253184_112280810_ATG3_NM_-|	34.7898	4.45953	1.78212	2.50237	0.0123364	0.220573	21.0837	0	2.27974	0	0	31.0708	77.2168	67.2522	98.5078	50.4871	19.4701	1.05423	3.79415	-0.41285	4.207	ATG3	-	-
chr18:55335652-55335722:mpeak_40322|chr18_55315944_55470327_ATP8B1_NM_-|	57.7858	1.55608	0.589607	2.63919	0.00831041	0.203161	27.7418	19.5761	2.27974	6.35534	8.00405	133.16	110.931	83.2104	86.8564	99.7428	19.3853	6.16699	2.09277	0.440444	1.65232	ATP8B1	-	-
chr3:136323148-136323266:mpeak_59797|chr3_136057119_136471245_STAG1_NM_-|	23.9731	2.86664	0.997779	2.87302	0.00406569	0.184529	5.54835	10.8756	1.13987	2.11845	0.615696	34.3998	51.1154	41.0353	49.7835	43.0987	19.2059	2.89283	2.66886	-0.0621302	2.73099	STAG1	-	-
chr1:155885311-155885367:mpeak_5931|chr1_155884111_155904233_KIAA0907_NM_-|	34.3305	2.43528	0.879475	2.76902	0.00562247	0.197157	8.87736	5.43781	3.4196	1.05922	3.69418	24.4127	51.1154	84.3503	93.2117	67.7266	18.9534	3.332	1.39357	-1.11443	2.508	KIAA0907	-	-
chr20:40205417-40205475:mpeak_52396|chr20_40034129_40247133_CHD6_NM_-|	33.0309	3.55149	1.04288	3.40545	0.000660553	0.0970503	11.0967	13.0507	1.13987	1.05922	0.615696	55.4835	77.2168	66.1124	61.435	43.0987	18.197	1.64949	3.68573	0.222127	3.46361	CHD6	-	-
chr6:10989930-10989979:mpeak_70617|chr6_10984139_11044624_ELOVL2_NM_-|	19.7675	3.52332	1.42416	2.47396	0.0133625	0.226932	13.316	7.61293	0	1.05922	0	47.7158	67.4288	12.5386	19.066	28.9377	18.1762	1.74956	4.88938	1.51239	3.37699	ELOVL2	-	-
chr20:9318670-9318719:mpeak_51572|chr20_9049700_9459567_PLCB4_NM_+|	16.3929	4.94066	1.57632	3.1343	0.00172263	0.138254	11.0967	1.08756	0	0	0	42.1675	25.0139	21.6575	29.6583	33.2476	18.1364	0	Inf	0.252991	Inf	PLCB4	-	-
chr1:24981514-24981631:mpeak_1140|chr1_24969593_24998672_SRRM1_NM_+|	33.0235	1.64541	0.759281	2.16707	0.0302298	0.315533	7.76769	7.61293	5.69934	1.05922	4.92557	35.5095	52.2029	71.8117	78.3826	65.2638	17.5353	5.42293	0.981525	-0.711592	1.69312	SRRM1	-	-
chrX:80457693-80457756:mpeak_87829|chrX_80457302_80552693_SH3BGRL_NM_+|	93.9087	1.57785	0.66265	2.38112	0.0172599	0.250607	34.3998	19.5761	11.3987	9.53301	9.23544	123.173	199.024	116.267	225.615	190.866	16.7524	5.66256	1.4243	-0.140545	1.56484	SH3BGRL	-	-
chr10:105780319-105780375:mpeak_12225|chr10_105726942_105785331_SLK_NM_+|	73.754	2.43029	0.7067	3.43893	0.000584009	0.0949185	13.316	26.1015	4.55947	6.35534	3.07848	103.199	139.208	106.008	169.476	166.238	16.2609	3.1679	2.07906	-0.280742	2.35981	SLK	-	-
chr3:25824744-25824803:mpeak_56884|chr3_25761126_25831530_NGLY1_NM_-|	27.594	1.67228	0.845281	1.97837	0.0478865	0.383427	9.98703	7.61293	5.69934	0	1.84709	46.6062	63.0785	49.0143	50.8427	41.2517	16.046	5.34795	1.80667	0.221518	1.58515	NGLY1	-	-
chr15:40231774-40231825:mpeak_27997|chr15_40226324_40327227_EIF2AK4_NM_+|	25.4113	1.70724	0.858409	1.98884	0.0467188	0.378268	9.98703	7.61293	1.13987	0	3.69418	53.2642	57.6407	38.7555	37.0728	44.9458	15.8694	4.00255	2.44923	0.461974	1.98726	EIF2AK4	-	-
chr11:106696668-106696724:mpeak_16306|chr11_106558482_106889171_GUCY1A2_NM_-|	53.1903	4.29971	1.07046	4.01671	5.90172e-05	0.0424963	2.21934	8.70049	1.13987	3.17767	0	25.5224	43.5024	119.686	164.18	163.775	15.8201	0.964509	1.92363	-2.11219	4.03582	GUCY1A2	-	-
chr1:155233732-155233784:mpeak_5817|chr1_155233191_155243320_CLK2_NM_-|	52.5641	2.72507	1.01157	2.69391	0.00706193	0.203115	23.3031	3.26268	3.4196	1.05922	3.07848	84.335	83.7422	71.8117	145.114	106.515	15.8057	2.33654	2.39859	-0.359416	2.758	CLK2	-	-
chr17:40963668-40963771:mpeak_36671|chr17_40962946_40976310_BECN1_NM_-|	189.213	1.50666	0.412267	3.65457	0.00025761	0.0678644	49.9352	41.3273	19.3778	20.1253	23.3965	280.747	302.342	345.38	356.958	452.537	15.6516	5.44643	1.12194	-0.400988	1.52292	BECN1	-	-
chr12:2926386-2926480:mpeak_17192|chr12_2921787_2939382_ITFG2_NR_+mpeak_17192|chr12_2921786_2933255_ITFG2_NM_+||	33.1043	2.08363	0.806594	2.58325	0.00978754	0.209975	7.76769	9.78805	4.55947	1.05922	1.84709	65.4706	47.8527	59.2732	73.0864	60.3382	15.4917	3.87435	1.81854	-0.180934	1.99947	ITFG2	-	-
chr15:50606336-50606442:mpeak_28582|chr15_50570981_50647605_GABPB1_NM_-|	38.2686	1.80183	0.804534	2.2396	0.0251172	0.291084	5.54835	11.9632	2.27974	1.05922	6.15696	57.7029	55.4656	98.0287	65.6719	78.8091	15.4739	3.91569	1.46789	-0.514608	1.98249	GABPB1	-	-
chr9:106892001-106892135:mpeak_84782|chr9_106856540_106901419_SMC2_NM_+|	86.1244	1.73032	0.573501	3.01711	0.00255196	0.166046	13.316	15.2259	14.8183	7.41457	7.38836	88.7736	97.8805	172.12	209.726	234.58	15.2913	4.80531	0.531413	-1.1386	1.67001	SMC2	-	-
chr3:12552696-12552893:mpeak_56495|chr3_12525930_12574160_TSEN2_NM_+|	22.8187	2.03053	0.953397	2.12979	0.0331894	0.326954	5.54835	6.52537	3.4196	1.05922	0.615696	37.7288	46.7651	36.4758	44.4874	45.5615	14.2895	4.02651	1.82981	0.00246276	1.82735	TSEN2	-	-
chr15:65115759-65115837:mpeak_29311|chr15_65108556_65117867_PIF1_NM_-|	30.6763	4.04234	1.32959	3.04029	0.00236354	0.161202	2.21934	9.78805	2.27974	0	0	44.3868	40.2398	51.2941	97.4486	59.1068	14.1887	1.09682	2.98195	-0.711394	3.69334	PIF1	-	-
chr3:196807930-196807994:mpeak_61662|chr3_196771600_197026143_DLG1_NM_-|	40.6131	1.613	0.777916	2.07348	0.0381274	0.345481	6.65802	13.0507	3.4196	6.35534	1.84709	57.7029	82.6546	87.7699	63.5534	83.119	14.0418	4.95731	1.34694	-0.155164	1.5021	DLG1	-	-
chr1:39918429-39918493:mpeak_1968|chr1_39549838_39951209_MACF1_NM_+|	61.3295	1.77308	0.806903	2.19739	0.0279929	0.305405	17.7547	20.6637	5.69934	5.29612	1.84709	92.1026	181.623	71.8117	84.7379	131.759	14.0354	4.45445	2.16583	0.510078	1.65575	MACF1	-	-
chr16:78155325-78155378:mpeak_33739|chr16_78133309_78312499_WWOX_NR_+mpeak_33739|chr16_78133309_79245504_WWOX_NM_+||	19.566	4.8875	1.50315	3.25151	0.00114795	0.12399	5.54835	5.43781	0	0	0	19.9741	58.7283	38.7555	29.6583	37.5575	13.9591	0	Inf	0.155768	Inf	WWOX	-	-
chr1:222828005-222828144:mpeak_8156|chr1_222791443_222838650_MIA3_NM_+|	34.1475	2.09102	0.906331	2.30713	0.0210475	0.271381	11.0967	6.52537	3.4196	0	2.46279	47.7158	81.5671	47.8745	73.0864	67.7266	13.6306	3.11753	2.16787	0.0394952	2.12838	MIA3	-	-
chr1:227504696-227504793:mpeak_8372|chr1_227182100_227505826_CDC42BPA_NM_-|	30.5023	5.66536	1.38825	4.08093	4.4855e-05	0.0370855	9.98703	3.26268	0	0	0	38.8385	60.9034	67.2522	65.6719	59.1068	13.284	0	Inf	-0.360105	Inf	CDC42BPA	-	-
chr7:135321541-135321591:mpeak_78516|chr7_135242661_135333151_NUP205_NM_+|	23.8273	5.24041	1.44599	3.6241	0.000289974	0.0696003	8.87736	2.17512	0	0	0	34.3998	48.9402	59.2732	47.6651	36.9418	13.2619	0	Inf	-0.202822	Inf	NUP205	-	-
chr2:32312551-32312614:mpeak_45537|chr2_32288679_32379442_SPAST_NM_+|	54.173	3.6627	0.950855	3.852	0.000117155	0.0600644	15.5354	5.43781	1.13987	1.05922	1.23139	68.7996	97.8805	111.707	113.337	125.602	12.5829	0.978333	3.19702	-0.487972	3.685	SPAST	-	-
chr21:22664420-22664473:mpeak_53757|chr21_22370632_22910166_NCAM2_NM_+|	31.5684	4.80646	1.41335	3.40075	0.000672022	0.0970503	2.21934	8.70049	0	1.05922	0	44.3868	42.4149	74.0914	91.0933	51.7185	12.5802	0.488339	3.95083	-0.736294	4.68713	NCAM2	-	-
chr20:30946537-30946640:mpeak_51984|chr20_30946146_31022234_ASXL1_NM_+|	23.9692	3.27362	1.33817	2.44634	0.0144315	0.230879	6.65802	4.35024	1.13987	1.05922	0	53.2642	34.802	27.3568	66.7311	44.3301	12.5	1.58873	2.90857	-0.0674106	2.97598	ASXL1	-	-
chr2:219360622-219360681:mpeak_50489|chr2_219319740_219433084_USP37_NM_-|	80.7146	1.26959	0.617789	2.05506	0.0398736	0.353592	15.5354	17.401	15.9582	6.35534	4.30987	132.051	133.77	161.861	175.831	144.073	12.3904	5.52621	0.89195	-0.272914	1.16486	USP37	-	-
chr3:128363767-128363836:mpeak_59456|chr3_128339436_128369719_RPN1_NM_-|	378.481	0.845765	0.427408	1.97882	0.0478359	0.383427	99.8703	66.3412	55.8535	31.7767	53.5656	655.815	715.615	707.858	633.416	764.695	12.1196	6.70455	0.820286	-0.0338402	0.854126	RPN1	-	-
chr3:33552045-33552184:mpeak_57049|chr3_33540209_33759705_CLASP2_NM_-|	41.1652	2.19265	0.941993	2.32767	0.0199294	0.265569	8.87736	6.52537	4.55947	0	2.46279	52.1545	75.0417	51.2941	97.4486	113.288	12.1094	2.67994	1.71814	-0.457718	2.17586	CLASP2	-	-
chr14:64653259-64653303:mpeak_25923|chr14_64319682_64692036_SYNE2_NM_+|	35.2158	3.66481	1.32742	2.76085	0.0057652	0.197682	15.5354	2.17512	1.13987	0	0.615696	56.5932	91.3551	55.8535	59.3165	69.5737	11.9707	0.95027	3.91956	0.26453	3.65503	SYNE2	-	-
chr7:135068688-135068764:mpeak_78497|chr7_135047938_135194875_CNOT4_NM_-|	36.1709	2.36363	0.912375	2.59064	0.00957979	0.209033	9.98703	7.61293	0	4.2369	0.615696	61.0319	87.0049	63.8326	57.1981	70.1894	11.8889	2.5377	2.44371	0.215684	2.22802	CNOT4	-	-
chr11:46670681-46670742:mpeak_14180|chr11_46638825_46693804_ATG13_NM_+|	72.1297	1.73965	0.664677	2.61728	0.00886336	0.206155	12.2064	18.4885	3.4196	3.17767	6.77266	115.406	148.996	106.008	157.824	148.998	11.6092	3.2386	1.78397	-0.0578566	1.84183	ATG13	-	-
chr8:54708194-54708298:mpeak_80372|chr8_54628584_54755871_ATP6V1H_NM_-|	67.5226	1.82887	0.871899	2.09757	0.0359433	0.337468	23.3031	4.35024	4.55947	3.17767	4.92557	92.1026	146.821	98.0287	163.12	134.837	11.5741	3.19776	1.71183	-0.143941	1.85577	ATP6V1H	-	-
chr7:75312472-75312530:mpeak_76921|chr7_75167545_75368290_HIP1_NM_-|	92.1918	1.91721	0.558147	3.43496	0.000592646	0.0949185	17.7547	13.0507	4.55947	5.29612	7.38836	143.147	128.332	221.134	188.542	192.713	11.3472	2.86259	1.42206	-0.564889	1.98695	HIP1	-	-
chr19:2121723-2121777:mpeak_40785|chr19_2102267_2151556_AP3D1_NM_-|	122.502	1.64185	0.752901	2.1807	0.0292054	0.310604	41.0578	9.78805	5.69934	12.7107	6.77266	207.508	246.876	200.617	256.332	237.659	11.19	3.62545	1.59866	-0.0273217	1.62598	AP3D1	-	-
chr12:98909873-98909935:mpeak_20565|chr12_98909350_98941350_TMPO_NM_+|	310.15	1.1132	0.428571	2.59747	0.00939128	0.209033	23.3031	30.4517	53.5738	41.3097	32.6319	219.715	264.277	750.033	842.083	844.12	11.1065	5.23412	-0.661244	-1.74664	1.08539	TMPO	-	-
chr16:1659398-1659470:mpeak_30770|chr16_1561151_1662109_IFT140_NM_-|	20.4258	4.31852	1.49552	2.88764	0.00388138	0.183069	7.76769	3.26268	0	0	0	39.9481	61.991	26.217	20.1253	44.9458	10.8206	0	Inf	0.744172	Inf	IFT140	-	-
chr20:42839330-42839384:mpeak_52437|chr20_42826379_42839546_OSER1_NM_-|	67.4709	1.35858	0.656455	2.06957	0.0384926	0.347624	15.5354	8.70049	7.97908	5.29612	4.30987	110.967	116.369	103.728	162.061	139.763	10.6608	4.33608	1.04776	-0.250099	1.29785	OSER1	-	-
chr12:132270534-132270597:mpeak_22148|chr12_132195631_132283967_SFSWAP_NM_+|	35.865	5.69219	1.50839	3.77367	0.000160861	0.0600644	8.87736	2.17512	0	0	0	28.8514	75.0417	62.6928	98.5078	82.5033	10.6383	0	Inf	-0.645066	Inf	SFSWAP	-	-
chr16:30938626-30938701:mpeak_32442|chr16_30934375_30958372_FBXL19_NM_+|	36.452	2.54604	0.972989	2.61672	0.00887789	0.206155	6.65802	8.70049	0	1.05922	1.84709	58.8125	91.3551	66.1124	67.7903	62.1853	10.2276	1.48215	2.98674	0.200035	2.7867	FBXL19	-	-
chr9:97844186-97844257:mpeak_84461|chr9_97488950_97848963_C9orf3_NM_+|	47.6419	2.57412	0.990619	2.59849	0.0093634	0.209033	2.21934	10.8756	5.69934	1.05922	0	62.1415	67.4288	102.588	108.041	116.367	10.1064	2.06687	1.53918	-0.750573	2.28976	C9orf3	-	-
chr10:88855649-88855718:mpeak_11332|chr10_88854952_88950240_FAM35A_NM_+|	114.532	1.90527	0.698654	2.72705	0.00639032	0.200035	18.8644	14.1383	14.8183	1.05922	5.54127	189.754	137.033	257.61	262.688	243.816	10.0992	2.80309	1.20867	-0.640477	1.84915	FAM35A	-	-
chr12:50390937-50390998:mpeak_18723|chr12_50384126_50419307_RACGAP1_NM_-|	56.1854	1.78374	0.853685	2.08946	0.036666	0.340324	6.65802	6.52537	6.83921	2.11845	3.07848	45.4965	88.0924	100.308	171.594	131.143	9.86862	2.98629	0.716311	-1.00818	1.72449	RACGAP1	-	-
chr1:21985572-21985628:mpeak_972|chr1_21923757_21995856_RAP1GAP_NM_-|	98.0293	1.80487	0.651789	2.7691	0.00562111	0.197157	23.3031	9.78805	3.4196	7.41457	5.54127	179.767	158.784	192.638	238.325	161.312	9.77435	2.76483	1.59987	-0.221935	1.82181	RAP1GAP	-	-
chr7:77171882-77171933:mpeak_76992|chr7_77166772_77268535_PTPN12_NM_+|	53.1118	2.94663	1.28994	2.28431	0.022353	0.278472	0	13.0507	3.4196	2.11845	0	56.5932	77.2168	90.0496	148.291	140.379	9.75318	1.46231	1.82164	-0.915982	2.73762	PTPN12	-	-
chr14:31611083-31611166:mpeak_24775|chr14_31570273_31676729_HECTD1_NM_-|	111.59	1.62318	0.661318	2.45446	0.0141095	0.229514	14.4257	19.5761	13.6784	5.29612	4.30987	135.38	219.687	216.575	261.628	225.345	9.57617	3.30957	1.13121	-0.401595	1.5328	HECTD1	-	-
chr3:53913957-53914020:mpeak_57958|chr3_53902889_53916229_ACTR8_NM_-|	68.4591	2.53691	1.01544	2.49833	0.0124779	0.221796	23.3031	4.35024	3.4196	3.17767	0	146.476	151.171	107.148	140.877	104.668	9.29063	1.87054	2.65247	0.340155	2.31232	ACTR8	-	-
chr15:78566682-78566771:mpeak_29864|chr15_78556486_78572586_DNAJA4_NM_+|	462.569	1.11588	0.512288	2.17822	0.0293896	0.310604	94.322	45.6776	51.2941	32.8359	38.1732	747.918	763.468	1006.5	1093.12	752.381	9.26299	4.28832	0.779923	-0.331141	1.11106	DNAJA4	-	-
chr5:145889677-145889727:mpeak_69273|chr5_145826872_145890003_TCERG1_NM_+|	34.1973	3.37332	1.5165	2.22441	0.0261208	0.297172	11.0967	0	2.27974	0	0	43.2771	77.2168	90.0496	54.0204	64.0324	9.20934	1.09549	2.86815	-0.20337	3.07152	TCERG1	-	-
chr8:61653806-61653985:mpeak_80503|chr8_61591323_61777574_CHD7_NM_+|	118.471	1.00626	0.491569	2.04704	0.0406541	0.357286	17.7547	21.7512	7.97908	12.7107	10.4668	208.618	221.862	233.673	198.075	251.82	9.17717	4.55794	0.927495	-0.0821737	1.00967	CHD7	-	-
chr2:136605674-136605771:mpeak_48499|chr2_136598521_136634047_MCM6_NM_-|	114.183	1.94025	0.708043	2.74029	0.00613844	0.200035	23.3031	11.9632	10.2588	0	6.15696	164.231	226.213	216.575	243.621	239.506	9.03235	2.34611	1.68817	-0.256663	1.94483	MCM6	-	-
chr13:28023608-28023687:mpeak_22696|chr13_28010030_28024739_MTIF3_NM_-|	36.9971	5.40194	1.37591	3.92609	8.63392e-05	0.0518083	3.32901	7.61293	0	0	0	48.8255	73.9542	80.9306	70.968	84.3504	8.91185	0	Inf	-0.359274	Inf	MTIF3	-	-
chr11:102953990-102954073:mpeak_16262|chr11_102933143_102962944_DCUN1D5_NM_-|	58.2225	2.27695	0.832187	2.7361	0.00621721	0.200035	3.32901	11.9632	2.27974	2.11845	2.46279	72.1286	103.318	109.427	144.054	131.143	8.71613	1.78381	1.74127	-0.547456	2.28873	DCUN1D5	-	-
chr18:44400892-44400943:mpeak_40097|chr18_44392575_44497495_PIAS2_NM_-|	31.3915	2.44885	1.21405	2.0171	0.0436851	0.367479	7.76769	3.26268	3.4196	0	0	59.9222	67.4288	31.9163	73.0864	67.1109	8.6614	1.98683	2.27454	0.150411	2.12413	PIAS2	-	-
chr1:109483963-109484173:mpeak_3820|chr1_109475123_109506121_CLCC1_NM_-|	109.375	1.57225	0.699438	2.24787	0.0245843	0.289135	25.5224	10.8756	9.11895	8.47379	1.84709	203.07	220.775	201.757	190.66	221.651	8.58759	3.16575	1.48981	0.0501003	1.43971	CLCC1	-	-
chr9:97843809-97843861:mpeak_84460|chr9_97488950_97848963_C9orf3_NM_+|	46.7663	5.80042	1.456	3.9838	6.78211e-05	0.0457835	11.0967	0	0	0	0	62.1415	67.4288	102.588	108.041	116.367	8.56423	0	Inf	-0.750573	Inf	C9orf3	-	-
chr10:79750807-79750862:mpeak_11153|chr10_79737384_79789298_POLR3A_NM_-|	106.237	1.67675	0.662023	2.53277	0.0113167	0.219841	23.3031	10.8756	2.27974	5.29612	7.38836	224.153	180.535	177.819	247.858	182.862	8.44568	2.45904	1.77654	-0.00357664	1.78012	POLR3A	-	-
chr19:55598753-55598812:mpeak_44273|chr19_55587220_55598895_EPS8L1_NM_+|	132.555	1.38959	0.541738	2.56505	0.010316	0.213046	33.2901	18.4885	9.11895	8.47379	4.30987	319.585	293.641	204.036	227.733	206.874	8.44364	3.42955	1.82622	0.526372	1.29985	EPS8L1	-	-
chr16:369769-369880:mpeak_30656|chr16_338248_402676_AXIN1_NM_-|	42.2469	3.02778	1.06527	2.84226	0.0044795	0.191237	8.87736	3.26268	1.13987	2.11845	0	74.3479	71.779	75.2313	84.7379	100.974	8.30788	1.24867	2.48254	-0.251552	2.73409	AXIN1	-	-
chr11:118379846-118379921:mpeak_16655|chr11_118307204_118392611_KMT2A_NM_+|	79.7275	1.86872	0.661865	2.82342	0.00475147	0.194494	8.87736	14.1383	1.13987	2.11845	6.15696	135.38	143.558	170.98	161.002	153.924	8.25118	1.93767	1.8745	-0.215772	2.09027	KMT2A	-	-
chr7:107864215-107864284:mpeak_77972|chr7_107790592_108096841_NRCAM_NM_-mpeak_77972|chr7_107790592_108096841_NRCAM_NM_-||	74.115	1.53042	0.745904	2.05176	0.0401929	0.354387	21.0837	5.43781	4.55947	3.17767	3.07848	168.67	158.784	124.246	108.041	144.073	8.09932	2.87375	1.87901	0.384143	1.49487	NRCAM	-	-
chr19:5957936-5957999:mpeak_41070|chr19_5917664_5978320_RANBP3_NM_-|	86.8908	1.4942	0.642119	2.32699	0.0199659	0.265569	12.2064	17.401	5.69934	3.17767	4.30987	180.876	187.061	129.945	192.779	135.453	8.04686	2.87812	1.75181	0.268516	1.4833	RANBP3	-	-
chr21:47951267-47951317:mpeak_54630|chr21_47878861_47987282_DIP2A_NM_+|	39.0672	2.7581	1.12873	2.44353	0.0145442	0.231148	4.43868	7.61293	0	3.17767	0	51.0448	98.9681	79.7908	69.9088	75.7306	8.03372	1.4096	2.50815	-0.00263174	2.51078	DIP2A	-	-
chr5:137542231-137542331:mpeak_68787|chr5_137524837_137549032_CDC23_NM_-|	53.3628	1.88696	0.924208	2.0417	0.0411812	0.358386	13.316	1.08756	3.4196	1.05922	2.46279	89.8833	93.5303	90.0496	129.225	109.594	7.85308	2.11075	1.63805	-0.25745	1.8955	CDC23	-	-
chr1:218480760-218480981:mpeak_8045|chr1_218458628_218504289_RRP15_NM_+|	133.92	1.73828	0.557769	3.11648	0.00183022	0.143248	24.4127	11.9632	7.97908	4.2369	6.77266	228.592	237.088	262.17	302.938	253.051	7.81135	2.3209	1.52281	-0.228078	1.75089	RRP15	-	-
chr3:153913666-153913726:mpeak_60329|chr3_153838791_153973119_ARHGEF26_NM_+|	46.955	3.5774	1.21572	2.94261	0.00325455	0.179565	2.21934	11.9632	0	1.05922	0.615696	93.2123	91.3551	87.7699	96.3894	84.9661	7.68419	0.622357	3.66691	0.0408325	3.62608	ARHGEF26	-	-
chrX:69712401-69712452:mpeak_87575|chrX_69664704_69722012_DLG3_NM_+|	102.093	1.21735	0.613223	1.98516	0.0471262	0.379914	21.0837	13.0507	4.55947	7.41457	4.92557	179.767	274.065	172.12	183.246	160.697	7.52139	3.27472	1.5992	0.399575	1.19963	DLG3	-	-
chr21:34715657-34715738:mpeak_53947|chr21_34697213_34727621_IFNAR1_NM_+|	121.437	1.94537	0.703307	2.76603	0.00567427	0.197157	27.7418	9.78805	5.69934	2.11845	4.92557	228.592	270.803	178.959	261.628	224.113	7.51506	1.91716	2.14325	0.172438	1.97082	IFNAR1	-	-
chr1:114432237-114432287:mpeak_4195|chr1_114355233_114442493_AP4B1-AS1_NR_+|	35.2661	4.83897	1.65767	2.91914	0.00350997	0.18265	11.0967	0	0	0	0	98.7607	50.0278	88.9097	46.6058	57.2598	7.45804	0	Inf	0.211305	Inf	AP4B1-AS1	-	-
chr1:148565731-148565891:mpeak_5069|chr1_148558187_148594396_NBPF15_NM_+|	64.5418	2.21037	0.831918	2.65696	0.00788494	0.203115	11.0967	5.43781	4.55947	3.17767	0	103.199	119.632	128.805	152.528	116.982	7.4202	1.94247	1.68057	-0.252999	1.93357	NBPF15	-	-
chr8:124361520-124361610:mpeak_82118|chr8_124333415_124408705_ATAD2_NM_-|	164.403	1.37131	0.468129	2.92934	0.00339677	0.18253	23.3031	17.401	10.2588	11.6515	8.00405	270.76	281.678	332.842	361.195	326.935	7.36808	2.92999	1.0293	-0.301096	1.33039	ATAD2	-	-
chr12:32886676-32886745:mpeak_18164|chr12_32832133_32896287_DNM1L_NM_+|	257.253	1.36101	0.646543	2.10505	0.0352866	0.335549	43.2771	25.0139	26.217	9.53301	9.23544	543.739	389.347	426.311	585.751	514.106	7.31884	2.94761	1.1872	-0.12487	1.31207	DNM1L	-	-
chr17:18579233-18579283:mpeak_35519|chr17_18566601_18585572_ZNF286B_NM_-|	42.7634	2.04528	0.972752	2.10257	0.0355036	0.335792	3.32901	8.70049	2.27974	1.05922	1.23139	68.7996	95.7054	99.1685	59.3165	88.0446	7.31255	1.85388	1.98116	0.00133227	1.97983	ZNF286B	-	-
chr11:47767110-47767160:mpeak_14306|chr11_47739064_47788993_FNBP4_NM_-|	38.2081	2.49356	1.1033	2.26009	0.0238154	0.286867	2.21934	9.78805	0	0	1.84709	86.5543	81.5671	58.1333	77.3233	64.6481	7.1421	0.923061	3.28556	0.33371	2.95185	FNBP4	-	-
chr3:150274956-150275008:mpeak_60241|chr3_150264573_150301632_EIF2A_NM_+|	47.4371	3.68203	1.273	2.8924	0.00382312	0.183069	4.43868	6.52537	0	0	1.23139	56.5932	97.8805	80.9306	104.863	121.908	7.09768	0.40019	3.73938	-0.409209	4.14859	EIF2A	-	-
chr3:32574474-32574598:mpeak_56992|chr3_32568400_32612366_DYNC1LI1_NM_-|	59.8829	1.72337	0.813683	2.11799	0.0341763	0.330345	7.76769	11.9632	4.55947	1.05922	1.23139	110.967	169.66	101.448	102.745	87.4289	7.031	2.34896	2.11122	0.529515	1.58171	DYNC1LI1	-	-
chr12:6626748-6626813:mpeak_17307|chr12_6603297_6640492_NCAPD2_NM_+|	113.82	2.34922	0.636057	3.69341	0.000221263	0.0678644	12.2064	13.0507	3.4196	0	5.54127	173.109	187.061	256.47	240.444	246.894	7.01257	1.20473	2.07994	-0.461294	2.54124	NCAPD2	-	-
chr18:55107214-55107265:mpeak_40276|chr18_55102916_55143668_ONECUT2_NM_+|	75.8879	4.28437	1.18659	3.61064	0.000305441	0.0717188	4.43868	13.0507	1.13987	1.05922	0	140.928	108.756	188.078	149.351	152.077	7.00461	0.449247	3.57646	-0.386259	3.96272	ONECUT2	-	-
chr22:31335637-31335699:mpeak_55320|chr22_31322858_31364483_MORC2_NM_-|	96.7688	2.3624	0.813923	2.90248	0.00370222	0.18265	4.43868	15.2259	2.27974	5.29612	1.84709	139.818	142.47	191.498	288.109	176.705	6.9661	1.43574	1.64631	-0.632246	2.27855	MORC2	-	-
chr12:118817957-118818042:mpeak_21507|chr12_118814357_118852139_SUDS3_NM_+|	228.168	1.17037	0.581654	2.01214	0.0442048	0.368415	39.9481	16.3134	19.3778	10.5922	12.9296	372.849	436.112	385.275	548.678	439.607	6.95479	3.12324	0.976147	-0.178816	1.15496	SUDS3	-	-
chr1:220965225-220965280:mpeak_8132|chr1_220960038_220986633_MARC1_NM_+|	80.7877	1.75495	0.735838	2.38497	0.0170806	0.249338	18.8644	5.43781	2.27974	3.17767	3.07848	187.534	163.134	157.302	133.462	133.606	6.93025	2.01143	2.09444	0.309747	1.78469	MARC1	-	-
chr17:38567603-38567701:mpeak_36484|chr17_38545899_38574202_TOP2A_NM_-|	163.931	1.2928	0.510742	2.53122	0.0113668	0.220227	14.4257	14.1383	15.9582	8.47379	9.23544	186.425	228.388	376.157	409.92	376.19	6.88601	2.8967	0.347809	-0.901447	1.24926	TOP2A	-	-
chr14:61246830-61246961:mpeak_25811|chr14_61201458_61434946_MNAT1_NM_+|	55.2141	5.60822	1.33363	4.20524	2.6081e-05	0.0352127	8.87736	3.26268	0	0	0	83.2253	95.7054	116.267	130.285	114.52	6.78478	0	Inf	-0.427918	Inf	MNAT1	-	-
chr1:112997097-112997186:mpeak_4076|chr1_112938799_112998552_CTTNBP2NL_NM_+|	76.1128	3.43573	1.03455	3.32099	0.000896989	0.111128	14.4257	6.52537	0	3.17767	0	127.612	182.71	127.665	137.699	161.312	6.75139	0.744749	3.30595	0.125587	3.18036	CTTNBP2NL	-	-
chr12:22646230-22646280:mpeak_17839|chr12_22602825_22697480_C2CD5_NM_-|	45.3355	4.14504	1.37063	3.02419	0.002493	0.165196	5.54835	6.52537	1.13987	0	0	75.4576	105.493	115.127	72.0272	72.0365	6.67237	0.43978	3.98989	0.0665495	3.92334	C2CD5	-	-
chr17:8347573-8347624:mpeak_35119|chr17_8339169_8370247_NDEL1_NM_+|	45.4639	3.39026	1.29667	2.61459	0.00893354	0.206155	7.76769	3.26268	0	0	1.23139	54.3739	114.194	96.8888	85.7971	91.123	6.54359	0.449727	3.74808	-0.114879	3.86296	NDEL1	-	-
chr2:61709576-61709680:mpeak_46362|chr2_61706101_61765418_XPO1_NM_-|	171.164	1.47864	0.51688	2.86071	0.00422694	0.187088	18.8644	15.2259	7.97908	8.47379	8.61975	280.747	258.84	328.282	434.282	350.331	6.31785	2.25292	1.02821	-0.45943	1.48764	XPO1	-	-
chr2:102770405-102770485:mpeak_47635|chr2_102686835_102792812_IL1R1_NM_+|	58.9198	3.72368	1.47614	2.52258	0.0116498	0.220256	12.2064	0	0	2.11845	0	98.7607	94.6178	111.707	181.127	88.6603	6.31217	0.555302	3.11152	-0.395273	3.50679	IL1R1	-	-
chr9:111640379-111640433:mpeak_84899|chr9_111631462_111696608_IKBKAP_NM_-|	47.8808	2.30242	0.989632	2.32654	0.0199896	0.265569	7.76769	4.35024	1.13987	0	1.84709	75.4576	117.457	90.0496	96.3894	84.3504	6.28152	1.10306	2.60536	0.0957507	2.50961	IKBKAP	-	-
chr3:33895362-33895428:mpeak_57066|chr3_33840062_33907842_PDCD6IP_NM_+|	100.826	1.30144	0.619942	2.09929	0.0357917	0.33729	14.4257	7.61293	7.97908	4.2369	3.69418	167.56	193.586	200.617	221.378	187.172	6.10242	2.61179	1.05505	-0.169291	1.22434	PDCD6IP	-	-
chr12:65152857-65152910:mpeak_19720|chr12_65110599_65153226_GNS_NM_-|	236.579	2.01958	0.825983	2.44506	0.0144827	0.230879	43.2771	11.9632	5.69934	3.17767	9.85114	350.656	587.283	344.24	443.815	565.825	5.88954	1.3833	2.14548	0.0554285	2.09005	GNS	-	-
chr17:34891383-34891489:mpeak_36181|chr17_34891402_34892942_PIGW_NM_+|	180.454	1.78084	0.883444	2.01579	0.0438219	0.367566	31.0708	5.43781	11.3987	4.2369	4.30987	239.689	381.734	306.625	379.202	440.839	5.875	1.77031	1.45714	-0.273449	1.73059	PIGW	-	-
chr16:71706047-71706099:mpeak_33466|chr16_71683947_71758604_PHLPP2_NM_-|	93.204	1.43488	0.629435	2.27964	0.0226293	0.280297	9.98703	9.78805	4.55947	3.17767	4.30987	166.451	171.835	194.917	166.298	200.717	5.84568	2.14385	1.29997	-0.147195	1.44716	PHLPP2	-	-
chr1:11136964-11137015:mpeak_539|chr1_11126805_11159967_EXOSC10_NM_-|	77.114	2.8668	0.994179	2.88359	0.00393175	0.18411	13.316	3.26268	3.4196	1.05922	0	117.625	171.835	144.763	151.469	164.391	5.72747	0.972341	2.4731	-0.085262	2.55836	EXOSC10	-	-
chr9:135152439-135152490:mpeak_86022|chr9_135140372_135230372_SETX_NM_-|	65.8362	5.45473	1.30847	4.16878	3.06234e-05	0.0367515	8.87736	5.43781	0	0	0	128.722	125.07	132.225	139.818	118.214	5.64053	0	Inf	-0.0358156	Inf	SETX	-	-
chr9:85670523-85670575:mpeak_84036|chr9_85597697_85678043_RASEF_NM_-|	130.707	1.94641	0.610555	3.18794	0.00143292	0.126861	12.2064	10.8756	1.13987	3.17767	6.15696	207.508	217.512	278.128	290.227	280.142	5.43079	1.23448	1.72485	-0.412414	2.13726	RASEF	-	-
chr3:195624768-195624896:mpeak_61495|chr3_195591058_195635880_TNK2_NM_-|	77.3446	1.79322	0.865308	2.07235	0.038233	0.346148	8.87736	6.52537	5.69934	0	1.84709	117.625	171.835	110.567	188.542	161.928	5.3212	1.63684	1.61428	-0.0865581	1.70084	TNK2	-	-
chr6:108279080-108279149:mpeak_73359|chr6_108193051_108279482_SEC63_NM_-|	305.828	0.995309	0.440577	2.25911	0.0238768	0.286867	32.1804	34.802	12.5386	11.6515	18.4709	608.099	664.5	486.724	637.653	551.664	5.26343	2.54534	1.23583	0.187684	1.04815	SEC63	-	-
chr9:33998779-33998873:mpeak_83425|chr9_33922597_34048947_UBAP2_NM_-|	113.203	3.61351	0.984835	3.66916	0.000243352	0.0678644	14.4257	11.9632	0	0	1.84709	284.076	218.6	193.778	228.792	178.552	5.24969	0.307274	4.42157	0.326932	4.09464	UBAP2	-	-
chr14:67720967-67721022:mpeak_26039|chr14_67708011_67799496_MPP5_NM_+|	112.063	3.23697	0.925314	3.49824	0.000468348	0.0880451	17.7547	5.43781	2.27974	2.11845	0	216.386	228.388	239.372	219.259	189.634	5.21446	0.678454	2.98364	0.0414473	2.9422	MPP5	-	-
chr11:134107735-134107789:mpeak_17079|chr11_134094498_134115337_VPS26B_NM_+|	89.5742	2.08169	0.878009	2.37092	0.0177438	0.253162	13.316	2.17512	1.13987	4.2369	1.84709	144.257	153.346	183.519	240.444	151.461	5.20531	1.2554	1.68557	-0.366272	2.05184	VPS26B	-	-
chr15:78585574-78585622:mpeak_29874|chr15_78575863_78592068_WDR61_NM_-|	96.7959	2.00543	0.797113	2.51587	0.0118738	0.220256	8.87736	8.70049	4.55947	0	3.07848	129.831	209.899	169.84	194.897	238.274	5.17405	1.26663	1.78746	-0.242833	2.0303	WDR61	-	-
chr1:17354313-17354370:mpeak_803|chr1_17345453_17380665_SDHB_NM_-|	61.2364	5.22164	1.36592	3.8228	0.000131945	0.0600644	3.32901	8.70049	0	0	0	93.2123	142.47	109.427	141.936	113.288	5.10411	0	Inf	-0.0447091	Inf	SDHB	-	-
chr8:61769001-61769154:mpeak_80516|chr8_61591323_61777574_CHD7_NM_+|	115.102	1.23592	0.611403	2.02145	0.043233	0.365475	9.98703	11.9632	7.97908	2.11845	4.92557	208.618	221.862	233.673	198.075	251.82	5.099	2.19775	1.13201	-0.0821737	1.21419	CHD7	-	-
chr17:40688804-40688854:mpeak_36636|chr17_40687950_40695045_NAGLU_NM_+|	56.5177	3.20398	1.4242	2.24967	0.02447	0.288575	11.0967	0	2.27974	0	0	137.599	81.5671	101.448	134.521	96.6643	5.06315	0.685359	2.86815	-0.0169478	2.8851	NAGLU	-	-
chr4:119609072-119609136:mpeak_64358|chr4_119606524_119631152_METTL14_NM_+|	78.4312	2.44002	0.863	2.82737	0.00469318	0.194494	8.87736	5.43781	3.4196	1.05922	0.615696	153.135	132.682	150.463	179.009	149.614	5.00851	1.06339	2.07549	-0.16023	2.23572	METTL14	-	-
chrX:2831697-2831748:mpeak_86486|chrX_2825673_2847416_ARSD_NM_-|	242.459	2.75856	0.98697	2.79498	0.00519031	0.197157	9.98703	6.52537	0	3.17767	0	527.093	627.523	367.038	444.874	438.376	1.43012	0.254155	2.96247	0.470116	2.49235	ARSD	chrX:2831697:-	-
chr9:133589917-133589971:mpeak_85948|chr9_133589267_133759355_ABL1_NM_+|	220.002	2.23108	0.983685	2.26808	0.0233243	0.283532	3.32901	8.70049	4.55947	0	0	385.056	526.38	344.24	470.295	457.462	1.31984	0.35845	1.9846	0.104078	1.88052	ABL1	chr9:133589972:+	chr9_130714584_+
chr9:131900338-131900396:mpeak_85844|chr9_131873227_131909665_PPP2R4_NM_+|	150.44	1.76576	0.7378	2.39327	0.0166989	0.247105	8.87736	6.52537	1.13987	4.2369	1.84709	318.475	263.19	295.226	324.122	280.757	2.64804	0.802556	1.67731	-0.0449433	1.72225	PPP2R4	chr9:131900390:+	chr9_129138109_+
chr9:130715482-130715596:mpeak_85704|chr9_130705516_130742812_FAM102A_NM_-|	614.785	1.38428	0.650321	2.12861	0.0332866	0.326954	21.0837	21.7512	6.83921	1.05922	10.4668	1145.18	1609.59	866.3	1187.39	1278.19	1.55494	0.551199	1.80677	0.31056	1.49621	FAM102A	chr9:130715475:-	-
chr9:127979565-127979655:mpeak_85558|chr9_127962820_127995966_RABEPK_NM_+|	265.764	3.15544	0.97886	3.22358	0.00126598	0.126212	5.54835	11.9632	1.13987	0	1.23139	524.874	612.297	458.227	519.02	523.342	1.53992	0.158022	3.46954	0.184883	3.28466	RABEPK	chr9:127979652:+	chr9_125217368_+
chr9:123540028-123540120:mpeak_85268|chr9_123527125_123555740_FBXW2_NM_-|	652.884	1.5189	0.725819	2.09267	0.0363789	0.33973	6.65802	6.52537	1.13987	1.05922	4.30987	1130.75	1302.9	1233.34	1397.12	1445.04	0.541712	0.15971	1.60318	-0.158889	1.76207	FBXW2	chr9:123540027:-;chr9:123540069:-	chr9_120777750_-;chr9_120777792_-
chr9:111835371-111835458:mpeak_84924|chr9_111782785_111882225_TMEM245_NM_-|	348.664	1.8723	0.78551	2.38355	0.0171464	0.249931	7.76769	6.52537	2.27974	4.2369	0	735.711	731.929	616.669	667.311	714.208	0.97388	0.326127	1.71808	0.139769	1.57831	TMEM245	chr9:111835370:-;chr9:111835405:-	chr9_109073091_-
chr8:144825690-144825997:mpeak_82671|chr8_144816309_144826029_FAM83H-AS1_NR_+|	393.228	1.08404	0.487081	2.22559	0.0260415	0.297172	22.1934	22.8388	13.6784	9.53301	9.23544	732.382	814.583	652.005	907.755	748.071	2.911	1.40595	1.05784	0.00786647	1.04997	FAM83H-AS1	chr8:144825777:+	chr8_143743603_+
chr8:144662673-144662849:mpeak_82627|chr8_144662000_144679845_EEF1D_NM_-|	2088.96	1.61869	0.712325	2.2724	0.0230625	0.283388	18.8644	6.52537	6.83921	5.29612	0.615696	4308.85	4612.35	3804.88	4340.7	3784.68	0.2846	0.10688	1.5786	0.165646	1.41295	EEF1D	chr8:144662708:-;chr8:144662785:-	-
chr7:80455105-80455166:mpeak_77055|chr7_80374623_80548667_SEMA3C_NM_-|	474.758	1.40981	0.642203	2.19528	0.0281438	0.305635	3.32901	10.8756	2.27974	5.29612	4.30987	734.602	712.352	1065.78	1066.64	1142.12	0.981691	0.362975	0.842092	-0.593307	1.4354	SEMA3C	chr7:80455107:-	chr7_80825794_-
chr7:75694126-75694277:mpeak_76936|chr7_75677336_75695596_MDH2_NM_+|	1413.35	2.06729	0.713498	2.8974	0.00376269	0.183067	21.0837	5.43781	3.4196	1.05922	4.30987	2789.71	2868.99	2489.47	3174.49	2775.56	0.468686	0.104137	2.17841	0.00827072	2.17013	MDH2	chr7:75694271:+	chr7_76064953_+
chr7:26250147-26250202:mpeak_75724|chr7_26240830_26251701_CBX3_NM_+|	837.952	2.2376	0.709698	3.15289	0.00161665	0.136355	5.54835	16.3134	3.4196	4.2369	1.23139	1557.98	1513.88	1700.68	2013.58	1562.64	0.711678	0.16843	1.88346	-0.195616	2.07908	CBX3	chr7:26250203:+	chr7_26210582_+
chr7:157002282-157002333:mpeak_79191|chr7_156931654_157060278_UBE3C_NM_+|	197.767	2.30903	0.933557	2.47337	0.0133846	0.22695	2.21934	8.70049	1.13987	2.11845	0.615696	349.546	410.011	403.513	427.926	371.881	1.43766	0.321944	2.08001	-0.0788287	2.15884	UBE3C	chr7:157002335:+	chr7_157209639_+
chr7:151941156-151941280:mpeak_79035|chr7_151834009_152133090_KMT2C_NM_-|	65.6114	2.0077	0.890329	2.255	0.0241331	0.28747	7.76769	6.52537	1.13987	0	2.46279	118.735	170.747	109.427	118.633	120.676	4.93746	1.03306	2.57315	0.316296	2.25685	KMT2C	chr7:151941178:-	-
chr7:1151069-1151142:mpeak_75041|chr7_1037440_1177893_C7orf50_NM_-|	345.26	1.84813	0.759346	2.43385	0.0149394	0.235219	14.4257	4.35024	4.55947	2.11845	1.23139	683.557	764.555	563.095	750.99	663.721	1.29658	0.399904	1.83222	0.135236	1.69699	C7orf50	chr7:1151062:-;chr7:1151088:-	chr7_1111456_-
chr6:70417719-70417769:mpeak_72604|chr6_70386163_70507049_LMBRD1_NM_-|	80.6575	3.94294	1.35877	2.90185	0.00370967	0.18265	3.32901	8.70049	0	1.05922	0	147.586	206.637	110.567	174.772	153.924	3.39603	0.241136	4.09046	0.274534	3.81593	LMBRD1	chr6:70417718:-	chr6_69707827_-
chr6:52957885-52958019:mpeak_72401|chr6_52929795_52962519_FBXO9_NM_+|	72.9582	1.92761	0.936759	2.05774	0.0396151	0.352457	1.10967	9.78805	0	2.11845	1.84709	126.502	159.871	134.504	142.995	150.846	3.80542	0.92578	2.0434	0.00408839	2.03931	FBXO9	chr6:52957942:+;chr6:52958020:+	chr6_53093144_+;chr6_53093207_+
chr5:95108353-95108410:mpeak_67624|chr5_95066849_95128762_RHOBTB3_NM_+|	246.387	3.65708	0.844513	4.3304	1.48837e-05	0.0324017	6.65802	10.8756	0	3.17767	1.84709	305.159	209.899	581.333	790.181	554.742	3.4042	0.260856	2.38796	-1.31803	3.70599	RHOBTB3	chr5:95108406:+	chr5_95772701_+
chr5:172749977-172750092:mpeak_69821|chr5_172745252_172756506_STC2_NM_-|	1726.79	3.1088	1.30076	2.38998	0.0168494	0.247269	6.65802	5.43781	1.13987	0	0	4408.72	5771.69	2533.93	2104.68	2435.69	0.118815	0.0161128	3.99253	1.1101	2.88243	STC2	chr5:172749972:-	-
chr5:139005534-139005584:mpeak_68923|chr5_138940750_139006340_UBE2D2_NM_+|	398.188	1.97905	0.8735	2.26566	0.0234725	0.284541	3.32901	7.61293	1.13987	3.17767	0.615696	665.802	872.224	819.565	782.766	825.649	0.711427	0.203183	1.73422	-0.0737142	1.80794	UBE2D2	chr5:139005591:+	chr5_139625999_+
chr5:115593006-115593157:mpeak_68117|chr5_115420672_115628147_COMMD10_NM_+|	74.4504	5.57442	1.357	4.10789	3.99282e-05	0.0370855	2.21934	8.70049	0	0	0	102.09	129.42	140.204	179.009	182.862	4.7168	0	Inf	-0.531868	Inf	COMMD10	chr5:115593060:+	chr5_116257387_+
chr4:122593739-122593881:mpeak_64420|chr4_122589682_122618147_ANXA5_NM_-|	171.925	2.54285	0.787706	3.22817	0.00124584	0.125944	13.316	8.70049	2.27974	1.05922	4.30987	178.657	342.582	357.919	445.933	364.492	4.22389	0.654673	2.11024	-0.579487	2.68972	ANXA5	chr4:122593709:-;chr4:122593735:-	-
chr3:9883882-9883935:mpeak_56367|chr3_9879891_9885702_RPUSD3_NM_-|	150.461	3.03103	1.23231	2.45962	0.0139082	0.227581	9.98703	1.08756	0	2.11845	0	356.204	289.291	254.191	336.833	254.898	1.71567	0.250431	2.97114	0.194845	2.77629	RPUSD3	chr3:9883882:-	-
chr3:63901833-63901883:mpeak_58162|chr3_63850232_63985125_ATXN7_NM_+|	135.116	1.94721	0.844788	2.30497	0.021168	0.271381	3.32901	8.70049	2.27974	1.05922	1.84709	244.127	256.664	263.31	240.444	329.398	2.4021	0.622462	1.79883	-0.149404	1.94824	ATXN7	chr3:63901886:+	-
chr3:194898775-194898942:mpeak_61446|chr3_194790840_194991895_XXYLT1_NM_-|	241.689	1.64508	0.763553	2.1545	0.0312008	0.31824	5.54835	15.2259	4.55947	3.17767	1.23139	524.874	555.744	357.919	546.56	402.05	1.92244	0.686441	1.79681	0.311081	1.48573	XXYLT1	chr3:194898775:-	chr3_195178046_-
chr3:140676144-140676210:mpeak_59916|chr3_140660661_140695101_SLC25A36_NM_+|	349.722	1.95335	0.817288	2.39004	0.0168465	0.247269	7.76769	5.43781	3.4196	1.05922	1.23139	658.035	709.09	671.382	607.994	831.806	0.965932	0.270475	1.79448	-0.0419444	1.83643	SLC25A36	chr3:140676214:+	-
chr21:47688238-47688316:mpeak_54587|chr21_47655340_47705308_MCM3AP_NM_-|	115.754	3.44564	1.16734	2.95169	0.00316035	0.177786	6.65802	11.9632	2.27974	0	0	230.811	329.531	170.98	203.371	201.948	3.32318	0.395582	3.61497	0.544452	3.07052	MCM3AP	chr21:47688267:-	chr21_46268351_-
chr21:42583322-42583457:mpeak_54254|chr21_42539727_42647297_BACE2_NM_+|	160.929	2.27518	0.922876	2.46531	0.0136894	0.226979	6.65802	4.35024	0	1.05922	1.84709	318.475	314.305	313.464	301.879	347.253	1.73967	0.301925	2.50629	-0.0202616	2.52655	BACE2	chr21:42583386:+;chr21:42583455:+	chr21_41211454_+;chr21_41211526_+
chr21:40719290-40719375:mpeak_54214|chr21_40715085_40721047_HMGN1_NM_-|	995.848	1.03883	0.433265	2.39768	0.0164993	0.247105	33.2901	41.3273	33.0562	23.3029	39.4046	1192.9	1467.12	2032.39	2669.24	2426.46	2.80515	1.34347	0.224997	-0.837118	1.06211	HMGN1	chr21:40719293:-	chr21_39347350_-
chr20:47843131-47843187:mpeak_52848|chr20_47835831_47860352_DDX27_NM_+|	552.256	1.73692	0.747303	2.32425	0.0201119	0.266866	8.87736	4.35024	3.4196	1.05922	1.84709	1060.84	1102.79	1098.83	1124.9	1115.64	0.611361	0.189434	1.64917	-0.0411586	1.69033	DDX27	chr20:47843183:+	chr20_49226644_+
chr20:17927787-17927935:mpeak_51698|chr20_17923051_17949634_SNX5_NM_-|	655.826	1.33021	0.603305	2.20487	0.0274632	0.302993	14.4257	10.8756	3.4196	12.7107	5.54127	1081.93	1013.61	1232.2	1781.61	1401.94	1.20739	0.490778	0.808373	-0.490378	1.29875	SNX5	chr20:17927790:-;chr20:17927881:-	chr20_17947148_-
chr2:70488536-70488621:mpeak_46667|chr2_70485230_70503865_PCYOX1_NM_+|	397.226	1.20463	0.601991	2.00107	0.0453844	0.371643	7.76769	21.7512	2.27974	7.41457	6.77266	911.039	768.906	787.649	700.147	758.538	1.75714	0.733059	1.42703	0.165804	1.26122	PCYOX1	chr2:70488591:+	chr2_70261457_+
chr2:47389450-47389540:mpeak_46030|chr2_47387943_47404075_CALM2_NM_-|	567.057	1.28472	0.479077	2.68165	0.007326	0.203115	24.4127	20.6637	21.6575	15.8884	25.8592	525.984	711.265	1224.22	1610.02	1490.6	3.64328	1.46607	0.0927362	-1.22055	1.31328	CALM2	chr2:47389445:-	chr2_47162305_-
chr2:26316591-26316740:mpeak_45240|chr2_26256728_26357806_RAB10_NM_+|	366.84	1.36373	0.615473	2.21574	0.0267091	0.3006	7.76769	10.8756	1.13987	4.2369	6.15696	670.241	642.749	819.565	805.01	700.662	1.41991	0.496024	1.27776	-0.23956	1.51732	RAB10	chr2:26316722:+	chr2_26093851_+
chr2:26291198-26291316:mpeak_45238|chr2_26256728_26357806_RAB10_NM_+|	366.059	1.82371	0.8301	2.19698	0.0280219	0.305413	1.10967	14.1383	3.4196	0	3.69418	670.241	642.749	819.565	805.01	700.662	1.16132	0.305938	1.68489	-0.23956	1.92445	RAB10	chr2:26291321:+	chr2_26068454_+
chr2:135028377-135028431:mpeak_48408|chr2_135011829_135206219_MGAT5_NM_+|	158.896	2.42846	0.936025	2.59444	0.00947452	0.209033	6.65802	5.43781	0	2.11845	1.23139	282.966	334.969	323.723	267.984	363.876	1.95746	0.350555	2.43731	-0.0439637	2.48127	MGAT5	chr2:135028432:+	chr2_134270859_+
chr19:8539066-8539139:mpeak_41217|chr19_8509711_8553574_HNRNPM_NM_+mpeak_41217|chr19_8509711_8553574_HNRNPM_NM_+||	1008.72	1.09951	0.538604	2.04141	0.0412106	0.358386	67.6899	30.4517	34.196	16.9476	27.7063	1701.12	1936.95	1800.99	2326.06	2145.09	2.69763	1.25715	0.900717	-0.20082	1.10154	HNRNPM	chr19:8539128:+	chr19_8474196_+;chr19_8474225_+
chr19:55595551-55595665:mpeak_44272|chr19_55587220_55598895_EPS8L1_NM_+|	128.814	1.31444	0.648274	2.0276	0.0426009	0.363741	7.76769	17.401	2.27974	6.35534	2.46279	319.585	293.641	204.036	227.733	206.874	4.1043	1.73772	1.76631	0.526372	1.23994	EPS8L1	chr19:55595603:+	chr19_55084230_+
chr19:2206726-2206801:mpeak_40788|chr19_2164147_2229783_DOT1L_NM_+|	76.5643	2.08896	0.899466	2.32245	0.0202088	0.267242	5.54835	7.61293	0	1.05922	2.46279	142.038	172.922	116.267	158.884	158.85	4.17871	0.811523	2.48679	0.122437	2.36435	DOT1L	chr19:2206804:+	-
chr19:16948963-16949015:mpeak_41883|chr19_16940197_16989307_SIN3B_NM_+|	88.8875	1.90431	0.861056	2.21159	0.0269947	0.301227	4.43868	11.9632	0	3.17767	1.84709	195.302	201.199	168.701	182.187	120.061	4.13665	1.06695	2.29169	0.336719	1.95498	SIN3B	chr19:16949011:+	-
chr19:16675823-16675909:mpeak_41869|chr19_16664720_16683193_SLC35E1_NM_-|	695.817	1.3247	0.579391	2.28637	0.0222328	0.278472	14.4257	11.9632	3.4196	5.29612	4.30987	1729.98	1358.36	1215.1	1322.97	1292.35	0.854468	0.340057	1.60354	0.274293	1.32925	SLC35E1	chr19:16675825:-	chr19_16565016_-
chr17:72437363-72437456:mpeak_38543|chr17_72427666_72442987_GPRC5C_NM_+|	286.113	2.26518	1.07643	2.10434	0.035349	0.335549	7.76769	3.26268	2.27974	1.05922	0	522.655	791.744	397.814	546.56	587.99	0.839195	0.217896	2.30897	0.363607	1.94537	GPRC5C	chr17:72437447:+	chr17_74441307_+
chr17:61829126-61829200:mpeak_38139|chr17_61824321_61851088_CCDC47_NM_-|	540.467	0.996611	0.507361	1.9643	0.049495	0.38908	23.3031	20.6637	18.2379	8.47379	6.15696	1199.55	1025.57	1068.06	1031.68	1002.97	1.97592	1.05935	1.00466	0.105319	0.899344	CCDC47	chr17:61829127:-	chr17_63751740_-
chr17:57762630-57762694:mpeak_37650|chr17_57697049_57771088_CLTC_NM_+|	2291.18	2.47107	0.934273	2.64491	0.00817117	0.203115	8.87736	5.43781	0	0	3.07848	3145.92	5569.4	4133.16	4998.48	5047.48	0.164253	0.0217114	2.80222	-0.11718	2.9194	CLTC	chr17:57762688:+	chr17_59685326_+
chr17:48450003-48450053:mpeak_37176|chr17_48445659_48450562_MRPL27_NM_-|	461.638	3.91729	1.31427	2.98058	0.00287705	0.175849	8.87736	2.17512	0	1.05922	0	924.355	1045.15	796.768	1010.5	827.496	0.561182	0.0402019	3.96825	0.16512	3.80313	MRPL27	chr17:48449995:-;chr17:48450026:-	chr17_50372635_-
chr17:26966069-26966132:mpeak_35792|chr17_26942264_26972177_KIAA0100_NM_-|	267.653	5.47052	1.49361	3.66261	0.000249655	0.0678644	0	15.2259	0	0	0	597.003	489.402	455.947	612.231	506.718	1.40149	0	Inf	0.0492675	Inf	KIAA0100	chr17:26966079:-	chr17_28639063_-
chr17:26961315-26961383:mpeak_35790|chr17_26942264_26972177_KIAA0100_NM_-|	273.631	1.16101	0.535731	2.16716	0.0302229	0.315533	22.1934	23.9263	3.4196	13.7699	11.6982	597.003	489.402	455.947	612.231	506.718	4.24517	1.83426	1.25989	0.0492675	1.21062	KIAA0100	chr17:26961330:-	chr17_28634313_-
chr17:17721581-17721715:mpeak_35431|chr17_17716165_17740325_SREBF1_NM_-|	349.363	2.12266	0.966531	2.19617	0.02808	0.305635	9.98703	5.43781	2.27974	0	2.46279	480.487	939.653	458.227	698.029	897.069	1.08615	0.230968	2.28649	0.0530337	2.23346	SREBF1	chr17:17721660:-	-
chr16:88992308-88992379:mpeak_34165|chr16_88943683_89043504_CBFA2T3_NM_-|	367.835	3.79642	1.31793	2.88059	0.00396929	0.18411	9.98703	3.26268	1.13987	0	0	924.355	885.275	702.159	479.828	672.34	0.732178	0.0614707	4.12399	0.549761	3.57422	CBFA2T3	chr16:88992308:-	-
chr16:88975978-88976089:mpeak_34160|chr16_88943683_89043504_CBFA2T3_NM_-|	375.271	1.08782	0.551854	1.9712	0.0487007	0.386209	23.3031	36.9771	12.5386	4.2369	11.6982	924.355	885.275	702.159	479.828	672.34	3.33108	1.53553	1.66702	0.549761	1.11726	CBFA2T3	chr16:88976011:-	-
chr16:88830146-88830196:mpeak_34134|chr16_88782262_88851372_PIEZO1_NM_-|	165.445	2.23953	0.967636	2.31444	0.0206438	0.269571	11.0967	2.17512	4.55947	0	0	324.024	393.697	287.247	307.175	324.472	1.84916	0.496192	2.12639	0.228487	1.8979	PIEZO1	chr16:88830144:-	chr16_88763716_-
chr16:56839542-56839596:mpeak_32833|chr16_56764016_56878410_NUP93_NM_+|	638.252	1.77849	0.857175	2.07483	0.0380023	0.345481	2.21934	9.78805	1.13987	3.17767	2.46279	998.703	1141.94	1032.72	1841.99	1348.37	0.560925	0.160554	1.40946	-0.395291	1.80475	NUP93	chr16:56839598:+	chr16_56805639_+;chr16_56805680_+
chr16:27517910-27517963:mpeak_32097|chr16_27472883_27561251_GTF3C1_NM_-|	149.427	1.53717	0.722239	2.12834	0.033309	0.326954	9.98703	6.52537	5.69934	0	3.07848	278.527	301.254	270.149	350.603	268.444	2.84804	0.987165	1.49658	-0.0320283	1.52861	GTF3C1	chr16:27517912:-	chr16_27506593_-
chr16:27242564-27242619:mpeak_32083|chr16_27236557_27280113_NSMCE1_NM_-|	111.275	3.7795	1.30022	2.90681	0.00365131	0.18265	5.54835	6.52537	0	0	0.615696	268.54	254.489	174.4	189.601	213.031	2.30842	0.106701	4.87847	0.443204	4.43527	NSMCE1	chr16:27242567:-	chr16_27231247_-
chr16:11890028-11890123:mpeak_31403|chr16_11845362_11891114_ZC3H7A_NM_-|	67.7105	2.01985	0.909786	2.22013	0.0264098	0.298908	4.43868	7.61293	2.27974	0	1.84709	134.27	134.858	113.987	162.061	115.751	4.47803	1.0533	2.13108	0.0431397	2.08794	ZC3H7A	chr16:11889982:-;chr16:11890091:-	chr16_11796127_-;chr16_11796186_-
chr15:65849067-65849238:mpeak_29361|chr15_65822826_65868640_HACD3_NM_+|	280.582	1.41017	0.63715	2.21324	0.0268812	0.301227	31.0708	18.4885	12.5386	3.17767	3.07848	681.338	738.454	507.241	373.906	436.529	3.4906	1.42635	1.98379	0.692646	1.29115	HACD3	chr15:65849242:+	chr15_65556823_+
chr15:50857910-50857960:mpeak_28634|chr15_50854005_50979012_TRPM7_NM_-|	410.448	4.02616	1.48078	2.71894	0.00654916	0.201531	12.2064	0	0	1.05922	0	614.757	1158.25	652.005	832.55	833.653	0.688455	0.0456915	4.11152	0.198154	3.91336	TRPM7	chr15:50857909:-	chr15_50565713_-
chr15:42518663-42518807:mpeak_28207|chr15_42503947_42565782_TMEM87A_NM_-|	385.045	2.17577	1.00423	2.16661	0.030265	0.315533	2.21934	10.8756	0	4.2369	0.615696	594.783	918.989	560.815	825.135	932.78	0.865054	0.209278	2.01715	-0.0302243	2.04737	TMEM87A	chr15:42518667:-	chr15_42226453_-;chr15_42226480_-;chr15_42226559_-
chr14:70236473-70236566:mpeak_26213|chr14_70233828_70237910_SRSF5_NM_+|	801.871	1.80365	0.861948	2.09252	0.0363918	0.33973	4.43868	10.8756	2.27974	0	2.46279	2231.55	1450.81	1277.79	1704.29	1334.21	0.415883	0.109875	2.27611	0.355796	1.92032	SRSF5	chr14:70236568:+	chr14_69769792_+;chr14_69769849_+
chr14:64855106-64855194:mpeak_25930|chr14_64854758_64926476_MTHFD1_NM_+|	178.84	2.55697	0.956038	2.67455	0.00748288	0.203115	18.8644	2.17512	4.55947	0	1.84709	282.966	362.158	335.121	374.965	405.744	3.26132	0.574152	2.30044	-0.205507	2.50595	MTHFD1	chr14:64855174:+	-
chr14:102389694-102389769:mpeak_27376|chr14_102228134_102391477_PPP2R5C_NM_+|	109.301	2.26433	0.82515	2.74414	0.00606689	0.200035	6.65802	6.52537	0	3.17767	1.84709	158.683	212.074	239.372	224.555	240.122	3.5558	0.713694	1.97656	-0.340239	2.3168	PPP2R5C	chr14:102389749:+	chr14_101923432_+
chr13:113885433-113885488:mpeak_24184|chr13_113862506_113917800_CUL4A_NM_+|	210.687	3.46409	1.21525	2.85051	0.00436493	0.190925	5.54835	5.43781	0	2.11845	0	291.843	464.389	375.017	498.894	463.619	1.45275	0.158385	2.95957	-0.237709	3.19728	CUL4A	chr13:113885484:+	chr13_113231169_+
chr12:54639885-54640006:mpeak_19145|chr12_54635689_54673915_CBX5_NM_-|	1489.8	1.43375	0.581698	2.46477	0.01371	0.226979	12.2064	13.0507	5.69934	4.2369	9.23544	2757.53	1910.84	3505.09	3088.7	3591.36	0.541026	0.188232	0.982675	-0.540512	1.52319	CBX5	chr12:54639898:-	chr12_54246154_-
chr12:121755659-121755779:mpeak_21686|chr12_121746494_121792012_ANAPC5_NM_-|	318.654	1.77575	0.81255	2.1854	0.0288596	0.31047	4.43868	8.70049	3.4196	0	1.84709	652.486	691.689	518.64	658.837	646.481	0.97749	0.288751	1.90387	0.144611	1.75926	ANAPC5	chr12:121755660:-;chr12:121755726:-	chr12_121317854_-;chr12_121317936_-
chr12:112936308-112936361:mpeak_21275|chr12_112856535_112943628_PTPN11_NM_+|	638.241	2.13812	0.902837	2.36822	0.0178738	0.253162	1.10967	11.9632	2.27974	2.11845	0.615696	1366	1198.49	1469.29	1154.55	1175.98	0.509763	0.13195	1.96754	0.0177055	1.94983	PTPN11	chr12:112936359:+	chr12_112498552_+
chr12:10765689-10765739:mpeak_17516|chr12_10758973_10766208_MAGOHB_NM_-|	111.854	2.32666	0.928175	2.5067	0.0121863	0.220256	3.32901	7.61293	1.13987	4.2369	0	149.806	212.074	216.575	270.102	253.667	3.02364	0.726252	1.61002	-0.447722	2.05774	MAGOHB	chr12:10765688:-	chr12_10613090_-
chr11:85425498-85425667:mpeak_15969|chr11_85406383_85522202_SYTL2_NM_-|	528.306	1.85827	0.829711	2.23966	0.0251133	0.291084	4.43868	15.2259	0	5.29612	4.30987	1182.91	644.924	1120.49	1304.96	1000.51	1.07584	0.280388	1.61855	-0.321412	1.93996	SYTL2	chr11:85425610:-	chr11_85714569_-
chr11:68160717-68160767:mpeak_15287|chr11_68080076_68216276_LRP5_NM_+|	54.4123	3.68637	1.33304	2.76538	0.00568558	0.197157	7.76769	4.35024	0	0	0.615696	133.16	127.245	93.4692	104.863	72.6522	4.65349	0.227207	4.88374	0.52751	4.35623	LRP5	chr11:68160769:+	-
chr11:59556623-59556681:mpeak_14467|chr11_59522531_59568327_STX3_NM_+|	234.003	1.56774	0.659977	2.37545	0.0175277	0.251751	9.98703	9.78805	11.3987	7.41457	6.15696	194.192	303.43	471.905	741.457	584.296	3.97392	1.38904	0.248438	-1.26803	1.51647	STX3	chr11:59556678:+	chr11_59789204_+
chr10:3177923-3178010:mpeak_9043|chr10_3109711_3178641_PFKP_NM_+|	681.307	1.89697	0.870264	2.17976	0.029275	0.310604	7.76769	4.35024	1.13987	0	3.07848	1604.58	1037.53	1304.01	1549.64	1300.97	0.458645	0.101534	2.10736	-0.0680599	2.17542	PFKP	chr10:3177973:+	chr10_3135825_+
chr1:52518356-52518421:mpeak_2501|chr1_52499723_52521843_TXNDC12_NR_-mpeak_2501|chr1_52486684_52521843_TXNDC12_NM_-||	141.482	3.45726	1.06114	3.25806	0.00112177	0.123021	4.43868	14.1383	0	3.17767	0	206.399	334.969	265.589	288.109	297.997	3.43149	0.3731	3.13244	-0.0687664	3.2012	TXNDC12	chr1:52518363:-	-
chr1:32479926-32479983:mpeak_1518|chr1_32479294_32525763_KHDRBS1_NR_+mpeak_1518|chr1_32479294_32508127_KHDRBS1_NM_+||	663.612	3.27687	1.1637	2.8159	0.00486413	0.194624	6.65802	4.35024	2.27974	0	0	1180.69	1420.35	1286.91	1379.11	1355.76	0.423225	0.0566847	2.85661	-0.0437822	2.90039	KHDRBS1	chr1:32479978:+	-
chr1:27269424-27269563:mpeak_1288|chr1_27248212_27272620_NUDC_NM_+|	242.787	1.89529	0.770715	2.45913	0.0139275	0.227581	26.6321	5.43781	6.83921	5.29612	3.07848	520.435	367.596	522.06	517.96	452.537	3.61135	1.01931	1.6608	-0.164141	1.82494	NUDC	chr1:27269437:+;chr1:27269544:+	chr1_26943038_+;chr1_26943062_+
chr1:205717926-205718080:mpeak_7706|chr1_205687607_205719372_NUCKS1_NM_-|	9035.83	1.1547	0.508506	2.27077	0.023161	0.283532	21.0837	16.3134	18.2379	20.1253	9.85114	13826.5	10226.3	22488.5	20274.6	23456.8	0.155479	0.0728094	0.21843	-0.876095	1.09453	NUCKS1	chr1:205717932:-;chr1:205717989:-	chr1_205748863_-
chr1:19209050-19209110:mpeak_824|chr1_19199451_19229293_ALDH4A1_NM_-|	294.646	3.22178	0.824549	3.90733	9.33233e-05	0.0530519	22.1934	7.61293	3.4196	3.17767	0	588.125	488.315	553.976	684.259	595.378	2.76897	0.359797	2.76064	-0.183458	2.9441	ALDH4A1	chr1:19209053:-	chr1_18882564_-
chr1:173835343-173835405:mpeak_6620|chr1_173833213_173837125_GAS5_NR_-|	391.875	1.86363	0.711399	2.61967	0.00880139	0.206155	15.5354	20.6637	3.4196	5.29612	4.30987	611.428	1062.55	510.661	918.347	766.542	2.16246	0.593273	2.05956	0.193659	1.86591	GAS5	chr1:173835345:-	chr1_173866198_-
chr1:16928886-16928965:mpeak_760|chr1_16890681_16940100_NBPF1_NM_-|	155.865	1.98579	0.649342	3.05815	0.00222705	0.159272	14.4257	11.9632	2.27974	3.17767	2.46279	339.559	359.983	290.666	266.924	267.212	3.77231	0.960253	2.32129	0.347323	1.97396	NBPF1	chr1:16928885:-	-
chr1:154192308-154192459:mpeak_5699|chr1_154180124_154193273_C1orf43_NM_-|	872.099	1.85754	0.826606	2.24719	0.0246278	0.289135	7.76769	4.35024	1.13987	3.17767	1.23139	1471.42	1908.67	1553.64	1876.94	1892.65	0.358509	0.10424	1.71182	-0.0702781	1.7821	C1orf43	chr1:154192417:-	chr1_154219942_-
chr1:153786056-153786110:mpeak_5637|chr1_153782786_153895451_GATAD2B_NM_-|	152.675	1.78863	0.804503	2.22327	0.0261976	0.297267	4.43868	7.61293	2.27974	4.2369	0.615696	238.579	304.517	292.946	342.129	329.398	2.21906	0.739505	1.34174	-0.24357	1.58531	GATAD2B	chr1:153786054:-	-
chr1:1499401-1499510:mpeak_110|chr1_1477547_1510262_SSU72_NM_-|	587.781	3.31993	1.19489	2.77845	0.0054619	0.197157	6.65802	5.43781	1.13987	1.05922	0	1411.5	976.63	1121.63	1379.11	974.647	0.506498	0.0632762	3.04449	0.0436706	3.00082	SSU72	chr1:1499369:-;chr1:1499459:-	chr1_1563992_-;chr1_1564080_-
chr1:117127155-117127211:mpeak_4414|chr1_117120184_117210377_IGSF3_NM_-|	792.722	2.42585	0.996399	2.43462	0.0149074	0.235058	4.43868	6.52537	2.27974	1.05922	0	1623.45	1834.72	1490.95	1447.96	1515.84	0.317048	0.0749528	2.30027	0.219624	2.08065	IGSF3	chr1:117127154:-	chr1_116584501_-
chr1:115118187-115118266:mpeak_4293|chr1_115110877_115124265_BCAS2_NM_-|	450.787	1.63645	0.484996	3.37416	0.000740411	0.0999647	17.7547	31.5393	10.2588	8.47379	9.85114	737.931	840.685	865.16	1064.52	921.697	3.12261	1.00245	1.37118	-0.268037	1.63922	BCAS2	chr1:115118204:-	chr1_114575572_-;chr1_114575604_-
chrX:114863502-114863644:mpeak_88170|chrX_114795176_114883748_PLS3_NM_+|	80.2737	1.65143	0.814711	2.02701	0.0426611	0.363936	8.87736	4.35024	5.69934	2.11845	0.615696	133.16	154.434	148.183	193.838	151.461	4.5994	1.70897	1.23431	-0.194001	1.42831	PLS3	-	chrX_115629246_+
chr9:140637817-140637977:mpeak_86411|chr9_140513443_140729224_EHMT1_NM_+|	60.0922	1.81393	0.859684	2.10999	0.0348591	0.334984	5.54835	7.61293	2.27974	2.11845	0.615696	132.051	135.945	106.008	105.922	102.821	4.911	1.59297	1.97726	0.352961	1.6243	EHMT1	-	chr9_137743459_+
chr8:61484593-61484658:mpeak_80495|chr8_61429468_61533232_RAB2A_NM_+|	616.971	2.22981	0.7282	3.06208	0.00219806	0.158477	7.76769	15.2259	3.4196	0	3.69418	1028.66	1359.45	1055.52	1421.48	1274.49	0.962832	0.189626	2.2775	-0.0666275	2.34413	RAB2A	-	chr8_60572082_+
chr8:116443725-116443781:mpeak_81897|chr8_116427312_116681255_TRPS1_NM_-|	3553.6	2.47045	0.902511	2.73731	0.00619442	0.200035	9.98703	2.17512	0	5.29612	0	5793.59	5878.27	6769.68	8635.85	8441.2	0.104201	0.022209	1.78435	-0.445795	2.23015	TRPS1	-	chr8_115431504_-
chr8:101962051-101962101:mpeak_81575|chr8_101932980_101965623_YWHAZ_NM_-|	1204.02	2.66257	0.89868	2.96276	0.00304895	0.177718	4.43868	6.52537	2.27974	2.11845	0	1969.66	2004.38	2668.43	2720.09	2662.27	0.275892	0.0546305	1.90276	-0.433561	2.33632	YWHAZ	-	chr8_100949841_-
chr4:40923628-40923686:mpeak_62793|chr4_40818276_41216635_APBB2_NM_-|	180.559	3.59451	1.18376	3.03653	0.00239318	0.161202	4.43868	9.78805	0	2.11845	0	329.572	389.347	408.073	281.754	380.5	1.97891	0.197925	3.33249	0.0108124	3.32167	APBB2	-	chr4_40921617_-
chr3:100096688-100096760:mpeak_58663|chr3_100084561_100120242_TOMM70A_NM_-|	447.929	0.941146	0.477152	1.97242	0.0485613	0.38572	38.8385	33.7144	33.0562	15.8884	24.0122	593.674	889.625	890.237	981.901	978.341	4.89132	2.55945	0.576955	-0.357433	0.934387	TOMM70A	-	chr3_100377851_-
chr22:36694999-36695091:mpeak_55495|chr22_36678831_36784112_MYH9_NM_-|	222.586	2.02703	0.776909	2.6091	0.00907814	0.206791	6.65802	10.8756	4.55947	0	1.84709	381.727	527.467	447.968	454.407	390.351	1.92848	0.495585	2.03747	0.0772048	1.96026	MYH9	-	chr22_36298991_-
chr20:47760691-47760755:mpeak_52842|chr20_47731430_47804904_STAU1_NM_-|	659.075	5.61276	1.48891	3.76971	0.000163438	0.0600644	14.4257	0	0	0	0	975.4	1457.33	1200.28	1547.53	1395.78	0.592984	0	Inf	-0.183342	Inf	STAU1	-	chr20_49144134_-
chr20:31973156-31973206:mpeak_52019|chr20_31946929_31989375_CDK5RAP1_NM_-|	53.5927	3.94152	1.37842	2.85945	0.00424374	0.187088	1.10967	9.78805	1.13987	0	0	110.967	110.931	90.0496	90.034	121.908	4.91113	0.37745	3.84205	0.140353	3.7017	CDK5RAP1	-	chr20_33385305_-
chr2:38298889-38299011:mpeak_45728|chr2_38298453_38303323_CYP1B1_NM_-|	1015.56	2.35232	0.736989	3.1918	0.00141391	0.126212	7.76769	7.61293	1.13987	2.11845	3.07848	1674.49	1402.95	2302.53	2680.9	2073.05	0.499785	0.0898011	1.86425	-0.612252	2.4765	CYP1B1	-	chr2_38071746_-
chr2:29013576-29013687:mpeak_45462|chr2_28974613_29022064_PPP1CB_NM_+|	301.741	3.37147	0.966964	3.48666	0.000489094	0.0880451	6.65802	9.78805	0	3.17767	0	539.3	590.546	596.151	630.238	641.556	1.4556	0.170116	2.95666	-0.140364	3.09703	PPP1CB	-	chr2_28790778_+
chr2:153519622-153519705:mpeak_48796|chr2_153512912_153573975_PRPF40A_NM_-|	184.852	1.64969	0.623368	2.64642	0.00813494	0.203115	13.316	10.8756	9.11895	3.17767	3.69418	264.102	348.02	345.38	432.163	418.673	3.9521	1.33678	1.18223	-0.381627	1.56386	PRPF40A	-	chr2_152663144_-
chr19:49593720-49593770:mpeak_43677|chr19_49588396_49611051_SNRNP70_NM_+mpeak_43677|chr19_49588396_49611051_SNRNP70_NM_+||	237.189	3.59464	0.954128	3.76746	0.000164916	0.0600644	9.98703	10.8756	0	3.17767	0	440.539	489.402	466.206	501.013	450.69	2.24344	0.22411	3.29984	-0.02359	3.32343	SNRNP70	-	chr19_49090472_+;chr19_49090493_+
chr19:2431606-2431665:mpeak_40820|chr19_2430950_2456966_LMNB2_NM_-|	349.92	1.23194	0.598102	2.05975	0.0394225	0.351798	26.6321	10.8756	15.9582	12.7107	8.61975	427.223	622.085	693.04	788.063	893.991	3.57452	1.56998	0.593415	-0.593584	1.187	LMNB2	-	chr19_2431614_-
chr17:60059498-60059671:mpeak_37995|chr17_60023961_60142643_MED13_NM_-|	354.332	1.41748	0.686562	2.06461	0.0389599	0.349506	35.5095	16.3134	20.5176	4.2369	8.00405	587.016	724.316	630.347	742.516	774.546	3.95193	1.52549	1.24668	-0.126602	1.37328	MED13	-	chr17_61982163_-;chr17_61982258_-
chr17:57271017-57271108:mpeak_37589|chr17_57232859_57278923_PRR11_NM_+|	1617.11	1.91735	0.627854	3.05382	0.00225947	0.159272	29.9611	10.8756	6.83921	1.05922	6.15696	3630.84	3223.53	3049.15	3020.91	3191.77	0.595776	0.151756	2.12371	0.150691	1.97301	PRR11	-	chr17_59193706_+
chr17:40970232-40970369:mpeak_36674|chr17_40962946_40976310_BECN1_NM_-|	176.112	2.97026	0.844327	3.51791	0.000434966	0.0867949	11.0967	6.52537	3.4196	2.11845	0	280.747	302.342	345.38	356.958	452.537	3.02219	0.479537	2.2549	-0.400988	2.65588	BECN1	-	chr17_42818276_-
chr17:38289291-38289346:mpeak_36424|chr17_38278789_38290531_MSL1_NM_+|	243.438	1.49133	0.714258	2.08794	0.0368034	0.34092	4.43868	20.6637	3.4196	8.47379	3.07848	430.552	491.578	495.843	501.013	475.318	2.72221	1.01699	1.33053	-0.0899432	1.42047	MSL1	-	chr17_40133104_+
chr17:30677258-30677351:mpeak_36080|chr17_30677156_30696617_ZNF207_NM_+|	185.627	1.31549	0.617175	2.13147	0.0330506	0.326605	15.5354	13.0507	7.97908	2.11845	6.77266	290.734	432.849	348.8	407.801	330.629	3.95063	1.55167	1.3458	-0.00246405	1.34827	ZNF207	-	chr17_32350249_+
chr16:30778560-30778655:mpeak_32411|chr16_30772932_30785258_RNF40_NM_+|	128.971	1.41326	0.681469	2.07384	0.0380941	0.345481	7.76769	15.2259	6.83921	5.29612	1.23139	265.211	265.365	218.855	278.576	225.345	4.33369	1.84936	1.36755	0.138975	1.22857	RNF40	-	chr16_30767347_+
chr15:52254591-52254696:mpeak_28766|chr15_52230457_52263998_LEO1_NM_-|	149.05	2.22573	1.09873	2.02573	0.0427922	0.363936	14.4257	0	3.4196	1.05922	0.615696	251.895	341.494	291.806	297.642	288.146	2.43107	0.58051	2.08659	0.0203878	2.0662	LEO1	-	chr15_51962348_-
chr15:41730584-41730640:mpeak_28146|chr15_41709301_41772778_RTF1_NM_+|	219.499	2.05593	0.733671	2.80225	0.00507475	0.197157	23.3031	11.9632	7.97908	0	3.07848	381.727	573.145	347.66	445.933	400.203	3.6933	0.926252	2.25822	0.262785	1.99543	RTF1	-	chr15_41438425_+
chr14:78203309-78203366:mpeak_26736|chr14_78184629_78227497_SNW1_NM_-|	125.328	1.6269	0.74557	2.18209	0.0291026	0.310604	11.0967	4.35024	2.27974	3.17767	1.84709	237.469	274.065	225.694	260.569	232.733	3.01973	1.01593	1.66543	0.0938109	1.57162	SNW1	-	chr14_77737008_-
chr14:21727162-21727223:mpeak_24400|chr14_21679465_21737638_HNRNPC_NM_-mpeak_24400|chr14_21679465_21737638_HNRNPC_NM_-||	1553.57	1.93781	0.720511	2.68949	0.00715613	0.203115	18.8644	5.43781	7.97908	2.11845	1.84709	2618.82	3102.81	2926.04	3407.52	3444.2	0.424742	0.122161	1.60969	-0.188116	1.79781	HNRNPC	-	chr14_21259007_-
chr12:69991406-69991510:mpeak_19951|chr12_69979207_69995074_CCT2_NM_+|	388.875	2.12297	0.886659	2.39435	0.0166499	0.247105	7.76769	3.26268	3.4196	1.05922	0.615696	641.389	767.818	744.334	961.775	757.306	0.782736	0.206807	1.69942	-0.220813	1.92024	CCT2	-	chr12_69597694_+
chr12:57036237-57036339:mpeak_19406|chr12_57032207_57039852_ATP5B_NM_-|	720.613	3.36867	1.18347	2.84644	0.00442117	0.191049	6.65802	6.52537	1.13987	0	0.615696	1230.62	1810.79	1220.8	1575.07	1353.92	0.433463	0.042305	3.49368	0.136669	3.35701	ATP5B	-	chr12_56642502_-
chr12:53402312-53402522:mpeak_18951|chr12_53400041_53433926_EIF4B_NM_+|	522.521	1.15155	0.54718	2.10451	0.0353339	0.335549	12.2064	13.0507	9.11895	1.05922	6.77266	1043.09	1011.43	1055.52	1095.24	977.726	1.22934	0.541823	1.1603	-0.0216972	1.18199	EIF4B	-	chr12_53008640_+
chr12:46354415-46354590:mpeak_18401|chr12_46315977_46384401_SCAF11_NM_-|	342.434	1.5344	0.64485	2.37946	0.0173378	0.250691	28.8514	18.4885	4.55947	21.1845	10.4668	457.184	584.02	593.871	888.689	817.029	4.54665	1.57466	0.971602	-0.55816	1.52976	SCAF11	-	chr12_45960698_-
chr11:33360292-33360402:mpeak_13928|chr11_33278217_33374637_HIPK3_NM_+|	129.761	1.7688	0.86725	2.03955	0.0413956	0.359212	12.2064	9.78805	0	5.29612	0	312.927	437.2	161.861	197.016	161.312	2.93209	1.01811	2.63909	1.11306	1.52603	HIPK3	-	chr11_33338795_+
chr11:118234875-118234935:mpeak_16621|chr11_118230295_118267028_UBE4A_NM_+|	145.325	2.76954	1.13157	2.44753	0.0143841	0.230879	0	10.8756	1.13987	1.05922	0.615696	243.018	302.342	314.604	237.266	342.327	1.99421	0.314784	2.53496	-0.128422	2.66338	UBE4A	-	chr11_118364219_+
chr1:43395357-43395454:mpeak_2158|chr1_43392912_43424847_SLC2A1_NM_-|	176.869	2.12074	0.946515	2.24058	0.0250533	0.290968	8.87736	8.70049	2.27974	0	1.23139	382.836	556.831	215.435	256.332	336.17	1.87065	0.434579	2.90871	0.802869	2.10584	SLC2A1	-	chr1_42929698_-
chr1:35907838-35907902:mpeak_1717|chr1_35900682_36023037_KIAA0319L_NM_-|	186.304	2.16863	0.851589	2.54657	0.0108786	0.217191	31.0708	5.43781	2.27974	4.2369	2.46279	379.507	491.578	297.506	329.419	319.546	4.19116	0.948726	2.6085	0.465218	2.14329	KIAA0319L	-	chr1_35442244_-
chr1:245020894-245021008:mpeak_8839|chr1_245017805_245027827_HNRNPU_NM_-mpeak_8839|chr1_245017805_245027827_HNRNPU_NM_-||	1217.88	2.40086	1.00203	2.39599	0.0165754	0.247105	13.316	1.08756	1.13987	0	2.46279	1829.85	2930.98	2170.31	2621.58	2608.09	0.302544	0.0486847	2.58426	-0.0513472	2.63561	HNRNPU	-	chr1_244857706_-
chr1:155659332-155659387:mpeak_5885|chr1_155658881_155707947_DAP3_NM_+|	401.843	1.86533	0.891023	2.09347	0.0363076	0.339531	4.43868	9.78805	3.4196	2.11845	0.615696	593.674	1091.91	677.082	798.655	836.731	0.844023	0.266112	1.79403	0.128779	1.66525	DAP3	-	chr1_155689591_+
chr1:110560987-110561076:mpeak_3962|chr1_110527386_110564295_AHCYL1_NM_+|	898.116	4.53197	1.41022	3.21367	0.0013105	0.126212	12.2064	0	0	0	0.615696	1300.53	1842.33	1672.19	1933.08	2220.2	0.388384	0.010569	4.89423	-0.305333	5.19957	AHCYL1	-	chr1_110018412_+
chr3:196120417-196120476:mpeak_61557|chr3_196083717_196159345_UBXN7_NM_-|	170.393	1.22251	0.542422	2.2538	0.0242089	0.287657	14.4257	13.0507	11.3987	5.29612	7.38836	298.501	251.227	326.002	369.669	406.975	4.99819	2.18412	0.775133	-0.419218	1.19435	UBXN7	-	-
chr1:200587855-200588001:mpeak_7318|chr1_200522895_200589862_KIF14_NM_-|	108.391	1.89511	0.798275	2.37401	0.0175962	0.252102	5.54835	6.52537	9.11895	1.05922	1.84709	144.257	100.056	295.226	276.457	243.816	4.94191	1.47459	0.590765	-1.15399	1.74476	KIF14	-	-
chr17:57105709-57105831:mpeak_37542|chr17_57060282_57184266_TRIM37_NM_-|	59.1894	2.0225	0.96161	2.10325	0.0354443	0.335549	7.76769	6.52537	1.13987	0	1.84709	115.406	175.097	85.4901	103.804	94.8172	4.92011	1.05133	2.84353	0.61706	2.22647	TRIM37	-	-
chr7:43798284-43798340:mpeak_76135|chr7_43798271_43846575_BLVRA_NM_+|	103.024	1.43799	0.728471	1.97399	0.0483832	0.385673	15.5354	5.43781	5.69934	0	4.30987	211.947	215.337	167.561	220.319	184.093	4.90849	1.74995	1.65218	0.164213	1.48797	BLVRA	-	-
chr2:25057660-25057710:mpeak_45171|chr2_25042983_25142055_ADCY3_NM_-|	71.1041	3.61849	1.29733	2.78918	0.00528411	0.197157	11.0967	1.08756	0	2.11845	0	98.7607	150.083	120.826	162.061	165.007	4.89634	0.47298	3.1089	-0.262952	3.37185	ADCY3	-	-
chr6:144110002-144110058:mpeak_74181|chr6_143929316_144144810_PHACTR2_NM_+|	172.178	1.28342	0.627553	2.04513	0.0408425	0.358359	21.0837	10.8756	6.83921	5.29612	7.38836	345.107	319.743	376.157	238.325	390.967	4.807	1.94179	1.29598	-0.0117757	1.30775	PHACTR2	-	-
chr12:122985182-122985236:mpeak_21812|chr12_122958822_122985620_ZCCHC8_NM_-|	80.6968	1.73352	0.878902	1.97237	0.0485677	0.38572	11.0967	3.26268	4.55947	0	2.46279	109.857	190.323	153.882	153.587	177.936	4.78358	1.44668	1.61695	-0.108399	1.72535	ZCCHC8	-	-
chr13:25831328-25831396:mpeak_22609|chr13_25823630_25861704_MTMR6_NM_-|	166.711	1.51839	0.631981	2.40258	0.0162798	0.247105	6.65802	19.5761	5.69934	4.2369	7.38836	254.115	294.729	314.604	418.393	341.711	4.77989	1.61203	1.18359	-0.384516	1.5681	MTMR6	-	-
chr10:22193446-22193560:mpeak_9641|chr10_22045684_22292650_DNAJC1_NM_-|	112.679	1.31645	0.645755	2.03862	0.0414879	0.359212	8.87736	10.8756	4.55947	2.11845	5.54127	181.986	234.913	217.715	252.095	208.105	4.73807	1.80246	1.27788	-0.116444	1.39433	DNAJC1	-	-
chr12:12980262-12980316:mpeak_17620|chr12_12966279_12982356_DDX47_NM_+|	77.9903	2.03114	0.91285	2.22505	0.0260776	0.297172	7.76769	5.43781	6.83921	0	0	134.27	146.821	150.463	188.542	139.763	4.69795	1.4285	1.5342	-0.183326	1.71753	DDX47	-	-
chr1:51912730-51912782:mpeak_2458|chr1_51822518_51984995_EPS15_NM_-|	61.0618	5.06865	1.32967	3.81198	0.00013786	0.0600644	3.32901	7.61293	0	0	0	118.735	118.544	111.707	128.166	122.524	4.61143	0	Inf	-0.0260237	Inf	EPS15	-	-
chr15:50769658-50769705:mpeak_28616|chr15_50716573_50791099_USP8_NM_+|	108.346	1.7624	0.746896	2.35964	0.0182929	0.256657	13.316	5.43781	2.27974	4.2369	2.46279	163.122	244.701	192.638	225.615	229.655	4.59853	1.38591	1.64746	-0.0828821	1.73034	USP8	-	-
chr16:4476041-4476097:mpeak_31146|chr16_4475805_4505546_DNAJA3_NM_+|	127.61	3.06744	0.831815	3.68765	0.000226336	0.0678644	12.2064	7.61293	4.55947	1.05922	0	199.741	233.826	246.212	287.05	283.836	4.57123	0.687641	2.40356	-0.329293	2.73285	DNAJA3	-	-
chr3:37159604-37159654:mpeak_57113|chr3_37095452_37217851_LRRFIP2_NM_-|	67.7725	4.3012	1.3324	3.22816	0.00124587	0.125944	8.87736	2.17512	0	0	0.615696	125.393	117.457	152.742	123.929	146.536	4.55117	0.145483	4.75097	-0.21634	4.96731	LRRFIP2	-	-
chr14:93290885-93290963:mpeak_27064|chr14_93260575_93305710_GOLGA5_NM_+|	88.2441	2.09221	0.904266	2.31371	0.0206836	0.269571	13.316	2.17512	4.55947	1.05922	0.615696	159.793	185.973	164.141	159.943	190.866	4.48025	1.21068	1.89809	0.0103249	1.88776	GOLGA5	-	-
chr16:11846687-11846739:mpeak_31394|chr16_11845362_11891114_ZC3H7A_NM_-|	67.2934	5.13259	1.36339	3.76458	0.00016683	0.0600644	2.21934	9.78805	0	0	0	134.27	134.858	113.987	162.061	115.751	4.4616	0	Inf	0.0431397	Inf	ZC3H7A	-	-
chr14:21873359-21873413:mpeak_24441|chr14_21854335_21905457_CHD8_NM_-|	92.2013	2.09606	0.840165	2.49482	0.012602	0.222059	12.2064	2.17512	2.27974	0	3.07848	149.806	174.01	177.819	198.075	202.564	4.44127	0.926293	2.00935	-0.25208	2.26143	CHD8	-	-
chr6:47458636-47458686:mpeak_72315|chr6_47445524_47591921_CD2AP_NM_+|	59.2757	4.89224	1.39235	3.51366	0.00044197	0.0867949	1.10967	9.78805	0	0	0	128.722	118.544	87.7699	129.225	117.598	4.40729	0	Inf	0.148618	Inf	CD2AP	-	-
chr17:59475167-59475229:mpeak_37916|chr17_59471108_59476967_TBX2-AS1_NR_-|	206.289	2.22478	0.626551	3.55084	0.000384003	0.0829523	21.0837	11.9632	4.55947	7.41457	1.23139	355.095	404.573	397.814	422.63	436.529	4.35018	1.05057	1.90835	-0.141552	2.0499	TBX2-AS1	-	-
chr14:75589389-75589439:mpeak_26567|chr14_75551389_75593778_NEK9_NM_-|	51.7798	4.47505	1.50878	2.966	0.00301699	0.177718	0	10.8756	0	0	0	104.309	146.821	107.148	74.1457	74.4992	4.33067	0	Inf	0.558421	Inf	NEK9	-	-
chr2:164589008-164589064:mpeak_49032|chr2_164468316_164592513_FIGN_NM_-|	60.9104	4.64067	1.3519	3.43271	0.00059758	0.0949185	8.87736	4.35024	0	0	0	150.915	155.521	116.267	70.968	102.206	4.31659	0	Inf	0.667285	Inf	FIGN	-	-
chr6:33623540-33623644:mpeak_71735|chr6_33589155_33663488_ITPR3_NM_+|	88.2789	2.60162	0.984198	2.64339	0.00820804	0.203115	8.87736	6.52537	1.13987	1.05922	1.23139	130.941	233.826	140.204	158.884	200.101	4.22262	0.687212	2.75166	0.132352	2.61931	ITPR3	-	-
chr2:44588516-44588607:mpeak_45937|chr2_44548584_44589001_PREPL_NM_-|	152.941	2.34254	0.725568	3.22856	0.00124413	0.125944	5.54835	10.8756	0	2.11845	5.54127	191.973	199.024	322.583	413.097	378.653	4.20054	0.687381	1.6854	-0.92599	2.61139	PREPL	-	-
chr10:112650307-112650368:mpeak_12322|chr10_112631552_112657785_PDCD4_NM_+|	89.327	3.8193	1.22685	3.1131	0.00185132	0.143675	2.21934	9.78805	2.27974	0	0	165.341	120.719	177.819	234.088	181.015	4.19751	0.384491	2.98195	-0.466563	3.44851	PDCD4	-	-
chr4:114577894-114577945:mpeak_64324|chr4_114375671_114683083_CAMK2D_NM_-|	71.9056	4.17989	1.39855	2.98873	0.0028014	0.173896	1.10967	10.8756	1.13987	0	0	156.464	129.42	170.98	141.936	107.131	4.19237	0.271367	3.97929	0.0298367	3.94945	CAMK2D	-	-
chr1:109825305-109825374:mpeak_3880|chr1_109822778_109825790_PSRC1_NM_-|	165.771	1.47005	0.586915	2.50471	0.0122552	0.220522	12.2064	7.61293	4.55947	5.29612	6.77266	238.579	236.001	339.681	421.571	385.426	4.17618	1.45012	0.838232	-0.687775	1.52601	PSRC1	-	-
chr5:175388112-175388162:mpeak_69875|chr5_175387135_175395318_THOC3_NM_-|	144.556	1.76372	0.68004	2.59356	0.00949887	0.209033	13.316	5.43781	7.97908	2.11845	2.46279	208.618	247.964	299.785	338.952	318.931	4.10744	1.31155	1.16328	-0.483689	1.64697	THOC3	-	-
chr14:21865198-21865302:mpeak_24436|chr14_21854335_21905457_CHD8_NM_-|	92.0324	2.41871	0.872369	2.77257	0.00556149	0.197157	3.32901	9.78805	1.13987	3.17767	0.615696	149.806	174.01	177.819	198.075	202.564	4.05079	0.852825	1.9958	-0.25208	2.24788	CHD8	-	-
chr19:19141749-19141886:mpeak_42040|chr19_19101958_19144380_SUGP2_NM_-|	88.9814	3.57984	1.18727	3.01518	0.00256826	0.166107	5.54835	8.70049	0	2.11845	0	171.999	180.535	170.98	210.786	139.147	4.04183	0.40668	3.33473	0.0216823	3.31305	SUGP2	-	-
chr10:98677503-98677648:mpeak_11746|chr10_98592016_98714709_LCOR_NM_+|	104.132	5.859	1.31529	4.45453	8.40757e-06	0.0324017	5.54835	6.52537	0	0	0	156.464	145.733	271.289	241.503	214.262	3.99532	0	Inf	-0.681612	Inf	LCOR	-	-
chr18:21047401-21047497:mpeak_39729|chr18_21032786_21061135_RIOK3_NM_+|	145.557	1.9938	0.847784	2.35178	0.0186838	0.2583	19.9741	4.35024	3.4196	2.11845	2.46279	365.082	255.577	207.456	327.3	267.828	3.91911	0.996885	2.18914	0.214109	1.97503	RIOK3	-	-
chr3:193336680-193336732:mpeak_61379|chr3_193310932_193412394_OPA1_NM_+|	101.152	2.37101	0.9148	2.59183	0.00954668	0.209033	11.0967	4.35024	1.13987	4.2369	0	185.315	209.899	153.882	215.022	226.576	3.9085	0.902928	2.10747	-0.00645776	2.11393	OPA1	-	-
chr12:80192303-80192374:mpeak_20233|chr12_80169795_80329235_PPP1R12A_NM_-|	80.0783	1.96853	0.922848	2.1331	0.0329163	0.326173	9.98703	3.26268	2.27974	1.05922	1.23139	134.27	206.637	128.805	159.943	153.308	3.88661	1.03388	2.12055	0.210109	1.91044	PPP1R12A	-	-
chr12:98938755-98938892:mpeak_20579|chr12_98909350_98941350_TMPO_NM_+|	297.561	1.28348	0.568455	2.25784	0.0239556	0.28721	11.0967	7.61293	11.3987	7.41457	17.8552	219.715	264.277	750.033	842.083	844.12	3.86569	1.50513	-0.385795	-1.74664	1.36084	TMPO	-	-
chr1:225975673-225975745:mpeak_8296|chr1_225965514_225976941_SRP9_NM_+|	103.731	2.09563	0.846887	2.47451	0.0133419	0.226932	6.65802	6.52537	3.4196	1.05922	1.84709	147.586	193.586	164.141	263.747	248.741	3.86415	0.934917	1.64434	-0.402903	2.04724	SRP9	-	-
chr1:100740426-100740526:mpeak_3579|chr1_100731713_100756958_RTCA_NM_+|	73.827	1.87257	0.914094	2.04855	0.0405059	0.356274	7.76769	4.35024	0	1.05922	2.46279	168.67	145.733	142.484	156.765	108.978	3.85427	0.862758	2.36764	0.208207	2.15943	RTCA	-	-
chr8:61742937-61743145:mpeak_80510|chr8_61591323_61777574_CHD7_NM_+|	113.931	1.71233	0.822341	2.08226	0.0373186	0.343139	13.316	3.26268	6.83921	0	1.84709	208.618	221.862	233.673	198.075	251.82	3.85121	1.27073	1.51748	-0.0821737	1.59966	CHD7	-	-
chr3:185337251-185337302:mpeak_61234|chr3_185304030_185347569_SENP2_NM_+|	59.0451	3.52577	1.32177	2.66747	0.00764252	0.203115	6.65802	4.35024	1.13987	0	0	135.38	151.171	86.63	101.685	103.437	3.84165	0.390697	3.85661	0.559009	3.2976	SENP2	-	-
chr11:74660315-74660447:mpeak_15688|chr11_74660291_74687901_SPCS2_NM_+|	430.209	1.87074	0.710841	2.63173	0.00849525	0.203161	46.6062	14.1383	15.9582	6.35534	6.15696	769.002	818.933	762.572	989.315	873.057	3.82537	1.08461	1.67825	-0.140172	1.81842	SPCS2	-	-
chr12:51642261-51642319:mpeak_18840|chr12_51639903_51664202_SMAGP_NM_-|	91.0153	3.69582	1.21465	3.0427	0.00234466	0.161202	5.54835	6.52537	0	0	1.23139	133.16	182.71	180.099	166.298	234.58	3.82236	0.211952	3.87847	-0.294186	4.17266	SMAGP	-	-
chr4:1807278-1807356:mpeak_61909|chr4_1795038_1808842_FGFR3_NM_+|	71.9193	3.01142	1.25421	2.40105	0.016348	0.247105	11.0967	1.08756	1.13987	1.05922	0	144.257	179.448	110.567	119.692	150.846	3.76401	0.57703	3.055	0.349452	2.70555	FGFR3	-	-
chr15:64418371-64418426:mpeak_29251|chr15_64388082_64429766_SNX1_NM_+|	258.217	1.40829	0.624168	2.25626	0.0240542	0.287345	12.2064	21.7512	6.83921	9.53301	6.77266	335.12	572.057	451.388	603.758	562.746	3.74321	1.43056	1.138	-0.249696	1.3877	SNX1	-	-
chr7:101842074-101842125:mpeak_77684|chr7_101459183_101926312_CUX1_NM_+|	79.8816	4.90851	1.4999	3.27255	0.00106582	0.123021	13.316	0	0	0	0	188.644	179.448	153.882	151.469	112.057	3.61759	0	Inf	0.403569	Inf	CUX1	-	-
chr3:155547471-155547521:mpeak_60371|chr3_155546166_155572248_SLC33A1_NM_-|	78.2085	2.53913	1.03921	2.44332	0.014553	0.231148	5.54835	6.52537	3.4196	0	0	189.754	146.821	125.386	159.943	144.689	3.58724	0.795226	2.40493	0.231494	2.17344	SLC33A1	-	-
chr7:99123999-99124050:mpeak_77471|chr7_99102272_99128730_ZKSCAN5_NM_+|	124.65	1.76159	0.813838	2.16455	0.0304224	0.316258	12.2064	6.52537	0	0	5.54127	271.869	251.227	210.876	276.457	211.8	3.58094	0.792592	2.34216	0.166472	2.17569	ZKSCAN5	-	-
chr7:66205732-66205787:mpeak_76639|chr7_66147077_66273872_RABGEF1_NM_+|	84.4485	3.40491	1.18823	2.86554	0.00416304	0.185041	8.87736	2.17512	2.27974	0	0	153.135	155.521	165.281	181.127	176.089	3.58085	0.436315	2.86239	-0.174462	3.03686	RABGEF1	-	-
chr5:132240063-132240110:mpeak_68542|chr5_132216878_132299354_AFF4_NM_-|	127.996	1.7341	0.864167	2.00667	0.0447849	0.369955	15.5354	4.35024	6.83921	1.05922	0.615696	269.65	291.466	247.351	190.66	252.435	3.54394	1.23313	1.80876	0.285731	1.52303	AFF4	-	-
chr14:67736410-67736462:mpeak_26040|chr14_67708011_67799496_MPP5_NM_+|	110.948	4.52179	1.28642	3.51501	0.000439734	0.0867949	7.76769	7.61293	0	1.05922	0	216.386	228.388	239.372	219.259	189.634	3.45808	0.163393	4.445	0.0414473	4.40355	MPP5	-	-
chr19:52803627-52803709:mpeak_43964|chr19_52800421_52824831_ZNF480_NM_+|	105.617	1.73017	0.760917	2.27379	0.0229784	0.282998	8.87736	6.52537	0	4.2369	1.84709	210.837	236.001	202.897	188.542	196.407	3.44705	1.03496	1.92506	0.189278	1.73578	ZNF480	-	-
chr11:59556333-59556429:mpeak_14466|chr11_59522531_59568327_STX3_NM_+|	231.985	3.04727	0.89666	3.39847	0.000677629	0.0970503	13.316	3.26268	5.69934	1.05922	1.23139	194.192	303.43	471.905	741.457	584.296	3.33159	0.444465	1.63804	-1.26803	2.90607	STX3	-	-
chr3:107493556-107493683:mpeak_58787|chr3_107241782_107524216_BBX_NM_+|	213.187	1.9062	0.59681	3.19399	0.00140322	0.126212	17.7547	11.9632	6.83921	2.11845	2.46279	437.21	458.951	403.513	390.854	400.203	3.31613	0.95603	1.96468	0.170301	1.79437	BBX	-	-
chr11:120298324-120298467:mpeak_16791|chr11_120207617_120355775_ARHGEF12_NM_+|	112.079	1.83038	0.833845	2.19511	0.0281555	0.305635	4.43868	10.8756	0	2.11845	3.07848	198.631	263.19	181.239	255.273	201.948	3.31607	0.813978	2.14411	0.117698	2.02641	ARHGEF12	-	-
chr8:61741283-61741369:mpeak_80509|chr8_61591323_61777574_CHD7_NM_+|	113.427	1.72841	0.765674	2.25737	0.0239851	0.28721	5.54835	8.70049	2.27974	0	3.69418	208.618	221.862	233.673	198.075	251.82	3.30999	0.873932	1.83906	-0.0821737	1.92123	CHD7	-	-
chr14:35076166-35076216:mpeak_24894|chr14_35032381_35099366_SNX6_NM_-|	118.754	1.86981	0.815346	2.29327	0.0218323	0.277098	12.2064	3.26268	4.55947	2.11845	0.615696	216.386	252.314	207.456	255.273	233.349	3.30042	1.04782	1.66964	0.0143783	1.65526	SNX6	-	-
chr21:37591743-37591795:mpeak_54057|chr21_37536838_37665617_DOPEY2_NM_+|	137.385	3.64738	1.12474	3.24287	0.00118331	0.125304	12.2064	9.78805	2.27974	0	0	321.804	352.37	238.232	230.911	206.258	3.26242	0.337538	3.85516	0.582338	3.27282	DOPEY2	-	-
chr7:30634722-30634775:mpeak_75875|chr7_30634180_30673350_GARS_NM_+|	355.67	1.41672	0.679055	2.0863	0.036951	0.341801	34.3998	13.0507	2.27974	9.53301	11.0825	646.938	830.897	642.886	776.411	589.221	3.21081	1.13991	1.63634	0.142316	1.49402	GARS	-	-
chr14:31578594-31578742:mpeak_24764|chr14_31570273_31676729_HECTD1_NM_-|	107.557	1.85261	0.932115	1.98754	0.0468631	0.378585	9.98703	1.08756	3.4196	0	2.46279	135.38	219.687	216.575	261.628	225.345	3.11901	0.836103	1.49774	-0.401595	1.89934	HECTD1	-	-
chr4:57344599-57344679:mpeak_63119|chr4_57333761_57367849_SRP72_NM_+|	237.639	2.19592	0.718855	3.05474	0.00225254	0.159272	17.7547	13.0507	6.83921	2.11845	1.23139	388.385	610.122	401.234	440.637	495.02	3.08515	0.762145	2.18113	0.163925	2.0172	SRP72	-	-
chr17:35345802-35345885:mpeak_36208|chr17_35306174_35413900_AATF_NM_+|	90.6025	3.19208	1.3297	2.40059	0.0163685	0.247105	11.0967	0	0	0	1.23139	188.644	182.71	183.519	203.371	135.453	2.98817	0.235744	3.75673	0.0927612	3.66397	AATF	-	-
chr3:121445849-121445899:mpeak_59149|chr3_121383461_121468614_GOLGB1_NM_-|	124.899	2.0629	1.0506	1.96355	0.0495824	0.389483	9.98703	6.52537	3.4196	2.11845	0	166.451	398.047	143.623	262.688	256.13	2.92515	0.836007	2.16106	0.35414	1.80692	GOLGB1	-	-
chr3:15841182-15841246:mpeak_56720|chr3_15712063_15901053_ANKRD28_NM_-|	99.5933	3.19874	1.29131	2.47713	0.0132443	0.226587	11.0967	1.08756	0	2.11845	0	155.354	263.19	165.281	192.779	205.027	2.91111	0.376221	3.1089	0.156984	2.95192	ANKRD28	-	-
chr20:18491457-18491509:mpeak_51740|chr20_18488187_18541294_SEC23B_NM_+|	291.976	1.27489	0.641387	1.9877	0.0468443	0.378585	18.8644	10.8756	12.5386	3.17767	6.77266	458.294	567.707	568.794	772.174	500.561	2.89863	1.22121	0.988156	-0.25891	1.24707	SEC23B	-	-
chr16:15157043-15157121:mpeak_31581|chr16_15155762_15188192_RRN3_NM_-|	412.108	1.64891	0.65745	2.50804	0.0121402	0.220256	23.3031	21.7512	14.8183	6.35534	3.07848	601.441	983.155	795.628	852.675	818.876	2.84327	0.982989	1.47852	-0.0537845	1.5323	RRN3	-	-
chr6:151907588-151907703:mpeak_74444|chr6_151815174_151939081_CCDC170_NM_+|	151.63	1.7709	0.78708	2.24995	0.0244518	0.288575	13.316	4.35024	5.69934	2.11845	0.615696	311.817	309.955	254.191	334.715	279.526	2.84128	0.971117	1.65176	0.102937	1.54882	CCDC170	-	-
chr6:82891574-82891745:mpeak_72826|chr6_82881273_82957471_IBTK_NM_-|	310.156	1.77923	0.658896	2.70033	0.00692718	0.203115	16.6451	16.3134	12.5386	2.11845	2.46279	508.229	659.062	596.151	696.969	591.068	2.8235	0.908602	1.52995	-0.105817	1.63576	IBTK	-	-
chr2:55818668-55818723:mpeak_46218|chr2_55777142_55844860_SMEK2_NM_-|	133.568	3.75519	1.27023	2.95632	0.00311336	0.177718	1.10967	10.8756	1.13987	1.05922	0	164.231	277.328	262.17	335.774	281.989	2.71431	0.249916	3.03125	-0.409823	3.44107	SMEK2	-	-
chr19:1884071-1884192:mpeak_40766|chr19_1877424_1885518_ABHD17A_NM_-|	95.5238	3.04992	1.2145	2.51125	0.0120304	0.220256	6.65802	4.35024	0	1.05922	0.615696	189.754	218.6	133.365	204.43	196.407	2.69577	0.313537	3.30139	0.197396	3.10399	ABHD17A	-	-
chr17:4245530-4245594:mpeak_34719|chr17_4175811_4269969_UBE2G1_NM_-|	169.905	2.29179	0.793438	2.88843	0.00387168	0.183069	6.65802	7.61293	5.69934	2.11845	0	292.953	238.176	346.52	412.038	387.273	2.68691	0.682281	1.45321	-0.524298	1.97751	UBE2G1	-	-
chr16:84127309-84127433:mpeak_33881|chr16_84088250_84150548_MBTPS1_NM_-|	328.586	1.52932	0.772814	1.9789	0.0478278	0.383427	28.8514	8.70049	11.3987	1.05922	4.92557	673.57	730.841	543.717	706.502	576.292	2.67386	0.951731	1.69613	0.205837	1.4903	MBTPS1	-	-
chr21:45456593-45456643:mpeak_54430|chr21_45432205_45523173_TRAPPC10_NM_+|	98.7002	4.7903	1.32104	3.62617	0.000287659	0.0696003	5.54835	6.52537	0	0	0	197.521	256.664	172.12	188.542	160.081	2.65832	0	Inf	0.387673	Inf	TRAPPC10	-	-
chr14:103871488-103871663:mpeak_27524|chr14_103851700_103969218_MARK3_NM_+|	229.142	1.75119	0.696955	2.51263	0.0119834	0.220256	6.65802	14.1383	3.4196	2.11845	4.92557	338.449	469.826	397.814	545.5	508.565	2.57292	0.720695	1.57591	-0.260039	1.83595	MARK3	-	-
chr1:203766304-203766419:mpeak_7526|chr1_203764750_203821268_ZC3H11A_NM_+|	287.731	1.43893	0.611705	2.35233	0.0186564	0.2583	15.5354	11.9632	6.83921	4.2369	5.54127	643.609	431.762	652.005	605.876	499.945	2.55712	0.945337	1.31163	-0.123996	1.43562	ZC3H11A	-	-
chr19:47234007-47234181:mpeak_43436|chr19_47223595_47249720_STRN4_NM_-|	119.031	3.34744	1.2938	2.58729	0.00967349	0.209975	11.0967	1.08756	0	1.05922	0.615696	166.451	312.13	214.295	244.681	238.89	2.54592	0.240006	3.44782	0.0407741	3.40704	STRN4	-	-
chr19:12736547-12736689:mpeak_41575|chr19_12721731_12738534_ZNF791_NM_+|	127.752	2.79071	1.01843	2.7402	0.00614009	0.200035	9.98703	3.26268	0	3.17767	0	269.65	258.84	218.855	271.161	242.584	2.50709	0.433752	2.64488	0.113811	2.53107	ZNF791	-	-
chr16:88957129-88957192:mpeak_34159|chr16_88943683_89043504_CBFA2T3_NM_-|	372.173	1.91288	0.61022	3.13475	0.00172003	0.138254	26.6321	18.4885	6.83921	2.11845	3.69418	924.355	885.275	702.159	479.828	672.34	2.49336	0.682287	2.4194	0.549761	1.86964	CBFA2T3	-	-
chr1:11076894-11077067:mpeak_521|chr1_11072678_11082180_TARDBP_NM_+|	736.397	1.32383	0.587729	2.25244	0.0242943	0.288354	42.1675	18.4885	25.0771	7.41457	15.3924	1189.57	1260.48	1660.79	1559.18	1585.42	2.47571	0.996467	0.926067	-0.386878	1.31295	TARDBP	-	-
chr3:63911194-63911421:mpeak_58166|chr3_63850232_63985125_ATXN7_NM_+|	134.963	2.23925	0.913653	2.45088	0.0142509	0.229738	9.98703	2.17512	0	1.05922	2.46279	244.127	256.664	263.31	240.444	329.398	2.42858	0.422734	2.37289	-0.149404	2.5223	ATXN7	-	-
chr12:65222214-65222270:mpeak_19730|chr12_65218351_65268780_TBC1D30_NM_+|	145.529	2.03503	0.850001	2.39415	0.0166588	0.247105	6.65802	9.78805	0	1.05922	2.46279	343.998	350.195	207.456	284.931	248.741	2.36909	0.475222	2.80824	0.490574	2.31766	TBC1D30	-	-
chr16:69398474-69398541:mpeak_33271|chr16_69390959_69419891_TERF2_NM_-|	134.684	1.6244	0.794764	2.04387	0.0409659	0.358386	8.87736	3.26268	0	2.11845	3.07848	244.127	280.591	271.289	259.51	273.985	2.31363	0.645755	1.80901	-0.032095	1.8411	TERF2	-	-
chr17:80587501-80587563:mpeak_39189|chr17_80573901_80606411_WDR45B_NM_-|	253.715	1.36762	0.683082	2.00213	0.0452707	0.371275	6.65802	8.70049	5.69934	4.2369	6.15696	262.992	404.573	499.262	694.851	644.018	2.30068	0.87552	0.51755	-0.876298	1.39385	WDR45B	-	-
chr16:27500361-27500420:mpeak_32095|chr16_27472883_27561251_GTF3C1_NM_-|	148.902	1.89237	0.877708	2.15604	0.0310805	0.318061	7.76769	5.43781	6.83921	0	0	278.527	301.254	270.149	350.603	268.444	2.27767	0.769146	1.5342	-0.0320283	1.56623	GTF3C1	-	-
chr16:27492386-27492520:mpeak_32092|chr16_27472883_27561251_GTF3C1_NM_-|	148.731	2.19274	0.872802	2.5123	0.0119947	0.220256	5.54835	7.61293	4.55947	0	0.615696	278.527	301.254	270.149	350.603	268.444	2.27004	0.582006	1.93158	-0.0320283	1.96361	GTF3C1	-	-
chr1:36759454-36759545:mpeak_1810|chr1_36690016_36769396_THRAP3_NM_+|	137.022	1.9139	0.973763	1.96547	0.0493601	0.388869	6.65802	6.52537	5.69934	0	0	214.166	371.946	214.295	265.865	285.067	2.24929	0.74479	1.79482	0.20025	1.59457	THRAP3	-	-
chr6:34653237-34653288:mpeak_71805|chr6_34558377_34664627_C6orf106_NM_-|	617.485	1.85655	0.498222	3.72635	0.000194271	0.0655727	27.7418	23.9263	10.2588	2.11845	9.85114	1064.17	1261.57	1183.18	1352.63	1239.4	2.22157	0.588799	1.80183	-0.113901	1.91573	C6orf106	-	-
chr11:85438038-85438100:mpeak_15978|chr11_85406383_85522202_SYTL2_NM_-|	532.509	1.31565	0.582326	2.2593	0.023865	0.286867	17.7547	22.8388	10.2588	10.5922	9.85114	1182.91	644.924	1120.49	1304.96	1000.51	2.22086	0.896163	0.98787	-0.321412	1.30928	SYTL2	-	-
chr12:132560525-132560575:mpeak_22171|chr12_132434464_132561945_EP400_NM_+|	138.171	1.95088	0.875489	2.22834	0.025858	0.296489	8.87736	4.35024	3.4196	0	1.23139	254.115	343.669	235.953	269.043	261.055	2.21277	0.60714	2.0929	0.227146	1.86576	EP400	-	-
chr13:100172282-100172389:mpeak_24009|chr13_100153627_100214944_TM9SF2_NM_+|	289.031	1.70128	0.659068	2.58134	0.00984176	0.209975	18.8644	6.52537	4.55947	3.17767	3.69418	549.287	612.297	487.864	649.304	554.742	2.18579	0.675646	1.73622	0.0424027	1.69381	TM9SF2	-	-
chr7:157033904-157034023:mpeak_79198|chr7_156931654_157060278_UBE3C_NM_+|	199.077	1.30262	0.662498	1.96623	0.0492717	0.388498	7.76769	8.70049	6.83921	2.11845	2.46279	349.546	410.011	403.513	427.926	371.881	2.16813	0.949077	1.11303	-0.0788287	1.19185	UBE3C	-	-
chr5:153776474-153776524:mpeak_69466|chr5_153570294_153796373_GALNT10_NM_+|	141.476	4.29259	1.32234	3.2462	0.00116955	0.125072	9.98703	1.08756	1.13987	0	0	258.553	254.489	273.568	316.708	299.228	2.15861	0.128146	3.86528	-0.208961	4.07424	GALNT10	-	-
chr5:106930404-106930467:mpeak_67857|chr5_106717077_107006596_EFNA5_NM_-|	159.835	2.54858	0.902226	2.82477	0.00473143	0.194494	8.87736	4.35024	0	3.17767	0.615696	301.83	317.568	337.401	309.293	315.236	2.13556	0.394349	2.38696	-0.0501036	2.43707	EFNA5	-	-
chr1:154562227-154562338:mpeak_5739|chr1_154557519_154600456_ADAR_NM_-|	687.247	1.00006	0.45207	2.21218	0.0269545	0.301227	37.7288	21.7512	13.6784	12.7107	14.7767	1322.73	1499.75	1198	1486.09	1265.26	2.10737	1.04234	1.11592	0.100308	1.01561	ADAR	-	-
chr17:4269560-4269611:mpeak_34721|chr17_4175811_4269969_UBE2G1_NM_-|	169.214	2.45363	0.892426	2.74939	0.00597063	0.199656	8.87736	2.17512	2.27974	0	1.84709	292.953	238.176	346.52	412.038	387.273	2.08094	0.36016	2.00623	-0.524298	2.53053	UBE2G1	-	-
chr1:150300775-150300825:mpeak_5282|chr1_150293927_150325308_PRPF3_NM_+|	171.519	2.61698	1.12142	2.33363	0.0196148	0.262853	13.316	0	0	3.17767	0.615696	336.23	305.605	348.8	401.446	306.001	2.07468	0.359137	2.39658	-0.13371	2.53029	PRPF3	-	-
chr2:11768596-11768685:mpeak_44935|chr2_11674241_11780416_GREB1_NM_+|	163.6	2.26711	0.999661	2.26788	0.0233367	0.283532	14.4257	6.52537	0	0	1.84709	506.01	507.891	200.617	168.417	230.27	2.06638	0.308206	4.08866	1.34352	2.74514	GREB1	-	-
chr16:18550175-18550242:mpeak_31665|chr16_18511825_18573434_NOMO2_NM_-|	362.736	1.53841	0.67644	2.27428	0.0229491	0.282961	17.7547	10.8756	10.2588	4.2369	2.46279	547.068	845.035	648.585	795.477	745.608	2.05663	0.774477	1.3405	-0.0684858	1.40898	NOMO2	-	-
chr17:7399795-7399993:mpeak_34981|chr17_7387697_7416339_POLR2A_NM_+|	367.454	1.47049	0.67088	2.19187	0.0283886	0.307857	23.3031	8.70049	5.69934	2.11845	6.77266	631.402	926.602	652.005	768.997	648.944	2.05414	0.704871	1.71817	0.175069	1.5431	POLR2A	-	-
chr12:69653200-69653251:mpeak_19911|chr12_69633316_69663291_CPSF6_NM_+|	150.09	3.28657	1.17073	2.80728	0.00499625	0.197157	8.87736	4.35024	2.27974	0	0	332.901	313.218	234.813	303.997	300.46	2.04724	0.271633	3.12158	0.207627	2.91395	CPSF6	-	-
chr16:67075317-67075376:mpeak_33022|chr16_67063049_67132612_CBFB_NM_+|	197.563	1.61814	0.810136	1.99737	0.0457847	0.372941	3.32901	8.70049	4.55947	5.29612	0.615696	249.676	339.319	375.017	509.487	479.627	2.04238	0.767616	0.7851	-0.626692	1.41179	CBFB	-	-
chr3:25705708-25705767:mpeak_56873|chr3_25639968_25705863_TOP2B_NM_-|	241.208	2.1042	1.03352	2.03595	0.0417553	0.359813	16.6451	2.17512	5.69934	1.05922	0.615696	378.398	578.582	359.059	505.25	564.593	1.96662	0.516079	1.93667	0.00661659	1.93006	TOP2B	-	-
chr2:8958858-8958928:mpeak_44759|chr2_8872112_8977755_KIDINS220_NM_-|	176.544	1.9752	0.947143	2.08543	0.0370302	0.341801	12.2064	1.08756	2.27974	0	2.46279	300.721	391.522	279.268	404.624	371.265	1.92042	0.449462	2.072	-0.0231442	2.09515	KIDINS220	-	-
chr6:79675654-79675708:mpeak_72763|chr6_79651047_79788011_PHIP_NM_-|	146.249	2.21444	1.11951	1.97804	0.047924	0.383427	12.2064	0	0	0	2.46279	309.598	329.531	253.051	305.056	250.588	1.90985	0.304538	2.89423	0.245473	2.64876	PHIP	-	-
chr12:49231060-49231173:mpeak_18578|chr12_49224475_49245957_DDX23_NM_-|	232.614	1.75365	0.812183	2.15918	0.0308363	0.317145	9.98703	5.43781	6.83921	2.11845	0.615696	342.888	479.614	398.954	577.277	502.408	1.87535	0.647444	1.27312	-0.261215	1.53434	DDX23	-	-
chr6:43540233-43540297:mpeak_72207|chr6_43491743_43543812_XPO5_NM_-|	186.515	1.79562	0.767664	2.33907	0.0193318	0.261236	7.76769	5.43781	1.13987	1.05922	3.07848	330.682	382.821	367.038	381.321	384.81	1.8508	0.465736	1.90815	-0.0824077	1.99056	XPO5	-	-
chr4:40880780-40880913:mpeak_62787|chr4_40818276_41216635_APBB2_NM_-|	180.802	1.90043	0.844617	2.25005	0.024446	0.288575	8.87736	4.35024	1.13987	3.17767	1.23139	329.572	389.347	408.073	281.754	380.5	1.83993	0.518434	1.83823	0.0108124	1.82742	APBB2	-	-
chr17:60641330-60641384:mpeak_38049|chr17_60556385_60689752_TLK2_NM_+|	153.45	1.91555	0.877917	2.18192	0.0291154	0.310604	2.21934	8.70049	0	1.05922	2.46279	326.243	287.116	303.205	306.116	297.381	1.78033	0.388442	2.21744	0.0210664	2.19638	TLK2	-	-
chr6:44115981-44116051:mpeak_72253|chr6_44095375_44122428_TMEM63B_NM_+|	182.272	2.8373	1.03012	2.75432	0.00588135	0.19874	6.65802	6.52537	1.13987	2.11845	0	296.282	444.812	312.324	383.439	369.418	1.77891	0.305893	2.60149	0.0615937	2.53989	TMEM63B	-	-
chr20:61846926-61847006:mpeak_53527|chr20_61828086_61847538_YTHDF1_NM_-|	414.621	1.27832	0.609506	2.09731	0.0359666	0.337468	21.0837	8.70049	5.69934	2.11845	8.61975	773.44	901.588	748.893	885.511	790.554	1.77813	0.677848	1.44252	0.0511879	1.39133	YTHDF1	-	-
chr2:8977604-8977654:mpeak_44761|chr2_8872112_8977755_KIDINS220_NM_-|	176.074	4.2473	1.43809	2.95343	0.00314269	0.177718	12.2064	0	1.13987	0	0	300.721	391.522	279.268	404.624	371.265	1.76331	0.108028	4.00566	-0.0231442	4.0288	KIDINS220	-	-
chr20:46290512-46290582:mpeak_52705|chr20_46287136_46415360_SULF2_NM_-|	413.468	1.21011	0.576617	2.09863	0.0358494	0.33729	14.4257	14.1383	13.6784	2.11845	4.30987	784.537	839.597	808.167	780.648	873.057	1.75872	0.816726	1.09148	-0.0151224	1.1066	SULF2	-	-
chr3:140675480-140675545:mpeak_59915|chr3_140660661_140695101_SLC25A36_NM_+|	351.461	1.37062	0.607841	2.25489	0.0241399	0.28747	13.316	9.78805	3.4196	4.2369	5.54127	658.035	709.09	671.382	607.994	831.806	1.68998	0.625136	1.39282	-0.0419444	1.43476	SLC25A36	-	-
chr5:137846729-137846835:mpeak_68816|chr5_137844076_137878989_ETF1_NM_-|	475.469	1.22146	0.57463	2.12565	0.0335327	0.328067	22.1934	8.70049	11.3987	5.29612	4.30987	954.317	936.39	951.79	949.065	911.23	1.63399	0.746943	1.14157	0.0122478	1.12933	ETF1	-	-
chr20:46301933-46302066:mpeak_52710|chr20_46287136_46415360_SULF2_NM_-|	411.918	2.52357	0.663023	3.80615	0.000141145	0.0600644	14.4257	11.9632	1.13987	3.17767	2.46279	784.537	839.597	808.167	780.648	873.057	1.6248	0.275413	2.54547	-0.0151224	2.56059	SULF2	-	-
chr3:88201517-88201567:mpeak_58522|chr3_88198892_88205170_C3orf38_NM_+|	161.87	3.08393	1.19678	2.57687	0.00996992	0.21109	5.54835	5.43781	0	2.11845	0	291.843	389.347	275.848	362.255	286.299	1.61279	0.22917	2.95957	0.144501	2.81507	C3orf38	-	-
chr6:128326115-128326166:mpeak_73823|chr6_128291425_128841819_PTPRK_NM_-|	176.034	4.15973	1.42295	2.92332	0.00346321	0.18265	0	10.8756	1.13987	0	0	292.953	381.734	280.408	434.282	358.951	1.61195	0.106169	3.83912	-0.0852581	3.92438	PTPRK	-	-
chr3:184022193-184022253:mpeak_61154|chr3_184016885_184026495_PSMD2_NM_+|	301.956	1.19442	0.603464	1.97927	0.0477858	0.383427	8.87736	10.8756	5.69934	2.11845	4.30987	648.048	591.633	575.633	620.705	551.664	1.59339	0.693801	1.28873	0.0892239	1.19951	PSMD2	-	-
chr7:157202643-157202700:mpeak_79214|chr7_157129709_157208709_DNAJB6_NM_+|	360.899	1.74711	0.668994	2.61154	0.00901345	0.206697	5.54835	13.0507	3.4196	4.2369	3.69418	550.397	627.523	678.222	945.887	777.009	1.57898	0.472725	1.29742	-0.442503	1.73992	DNAJB6	-	-
chr4:40439424-40439477:mpeak_62757|chr4_40428160_40631883_RBM47_NM_-|	159.106	3.84257	1.30603	2.94217	0.00325923	0.179565	2.21934	8.70049	1.13987	0	0	328.462	366.508	284.967	295.523	303.538	1.57127	0.12894	3.84497	0.237821	3.60715	RBM47	-	-
chr7:30020080-30020166:mpeak_75811|chr7_29963731_30029905_SCRN1_NM_-|	201.435	2.14008	0.859055	2.4912	0.0127313	0.222149	5.54835	5.43781	0	2.11845	1.84709	337.34	392.61	424.031	416.275	429.14	1.50506	0.312383	2.05506	-0.213369	2.26843	SCRN1	-	-
chr6:86221389-86221439:mpeak_72904|chr6_86215723_86303874_SNX14_NM_-|	197.982	3.30329	1.18712	2.78261	0.00539233	0.197157	5.54835	6.52537	0	2.11845	0	397.262	410.011	303.205	458.644	396.508	1.49562	0.182884	3.09575	0.0640099	3.03174	SNX14	-	-
chr17:55927121-55927171:mpeak_37400|chr17_55917296_55927433_MRPS23_NM_-|	237.035	4.4885	1.31754	3.40673	0.000657464	0.0970503	9.98703	3.26268	1.13987	0	0	363.972	523.117	450.248	521.138	497.483	1.49362	0.0776018	4.12399	-0.142593	4.26658	MRPS23	-	-
chr2:29122225-29122328:mpeak_45478|chr2_29117508_29169465_WDR43_NM_+|	372.679	1.13922	0.568071	2.00541	0.0449189	0.370034	12.2064	7.61293	4.55947	6.35534	4.92557	705.75	637.311	809.306	760.523	778.24	1.47568	0.674613	0.908261	-0.220987	1.12925	WDR43	-	-
chr7:5938492-5938554:mpeak_75287|chr7_5938340_5965262_CCZ1_NM_+|	269.374	1.83187	0.862531	2.12384	0.0336838	0.328653	6.65802	7.61293	0	4.2369	2.46279	359.533	620.997	426.311	711.798	554.127	1.45543	0.395907	1.67588	-0.202334	1.87821	CCZ1	-	-
chr12:123794090-123794135:mpeak_21927|chr12_123780597_123834988_SBNO1_NM_-|	165.411	2.25566	1.01938	2.21277	0.0269135	0.301227	6.65802	4.35024	1.13987	2.11845	0	356.204	407.835	256.47	307.175	312.158	1.4408	0.372037	2.34135	0.388003	1.95335	SBNO1	-	-
chr19:41270519-41270583:mpeak_43052|chr19_41256758_41270912_SNRPA_NM_+mpeak_43052|chr19_41256758_41270912_SNRPA_NM_+||	455.278	1.66325	0.686221	2.42378	0.0153601	0.239746	4.43868	19.5761	4.55947	3.17767	4.92557	934.342	737.366	864.02	1054.99	925.391	1.43654	0.445181	1.5083	-0.181838	1.69014	SNRPA	-	-
chr19:39882318-39882370:mpeak_42937|chr19_39881962_39888096_MED29_NM_+|	192.232	1.90788	0.933509	2.04377	0.0409761	0.358386	2.21934	8.70049	1.13987	2.11845	1.23139	473.829	290.379	408.073	351.662	382.963	1.42891	0.392904	1.86722	0.00455542	1.86266	MED29	-	-
chr17:47390056-47390184:mpeak_37119|chr17_47376286_47439835_ZNF652_NM_-|	178.516	2.90371	1.16417	2.49424	0.0126227	0.222059	4.43868	7.61293	2.27974	0	0	449.417	399.135	326.002	278.576	317.699	1.42026	0.247186	2.98725	0.464764	2.52249	ZNF652	-	-
chr6:38050164-38050213:mpeak_71983|chr6_37787306_38120010_ZFAND3_NM_+|	225.814	2.7503	1.155	2.3812	0.0172561	0.250607	13.316	0	2.27974	1.05922	0	434.991	507.891	410.353	467.118	421.136	1.41227	0.257119	2.58066	0.123147	2.45751	ZFAND3	-	-
chr5:71609934-71609988:mpeak_67071|chr5_71516975_71616084_MRPS27_NM_-|	234.379	2.15466	0.935097	2.3042	0.0212112	0.271447	12.2064	1.08756	2.27974	0	1.84709	401.701	545.956	429.73	453.348	495.635	1.40282	0.299324	2.27263	0.0440755	2.22855	MRPS27	-	-
chr16:56830676-56830726:mpeak_32832|chr16_56764016_56878410_NUP93_NM_+|	641.141	1.73774	0.695248	2.49946	0.0124383	0.221693	19.9741	9.78805	10.2588	2.11845	5.54127	998.703	1141.94	1032.72	1841.99	1348.37	1.39034	0.424299	1.31699	-0.395291	1.71228	NUP93	-	-
chr7:6846136-6846190:mpeak_75386|chr7_6838910_6865926_CCZ1B_NM_-|	201.093	5.0757	1.38827	3.65614	0.000256044	0.0678644	2.21934	8.70049	0	0	0	322.914	465.476	288.387	483.006	440.223	1.38508	0	Inf	-0.0349877	Inf	CCZ1B	-	-
chr6:127619030-127619088:mpeak_73801|chr6_127611422_127664754_ECHDC1_NM_-|	209.107	4.10031	1.29549	3.16507	0.00155045	0.133971	3.32901	8.70049	0	0	0.615696	408.359	464.389	408.073	377.084	420.521	1.37835	0.0510664	4.87318	0.118755	4.75442	ECHDC1	-	-
chr12:56574755-56574818:mpeak_19323|chr12_56557549_56583351_SMARCC2_NM_-|	257.698	1.88208	0.807107	2.33188	0.0197068	0.263106	12.2064	3.26268	3.4196	0	1.84709	540.409	595.983	434.29	474.532	511.028	1.36124	0.370933	2.13938	0.263686	1.87569	SMARCC2	-	-
chr20:46321334-46321395:mpeak_52714|chr20_46287136_46415360_SULF2_NM_-|	412.392	1.22243	0.605845	2.01774	0.0436188	0.367207	13.316	8.70049	10.2588	3.17767	2.46279	784.537	839.597	808.167	780.648	873.057	1.35559	0.64582	1.05459	-0.0151224	1.06971	SULF2	-	-
chr3:47951822-47951885:mpeak_57564|chr3_47894529_48130769_MAP4_NM_-|	210.548	4.1287	1.32876	3.10717	0.00188888	0.143675	8.87736	2.17512	0	1.05922	0	340.669	480.702	404.653	448.052	419.289	1.34561	0.0832727	3.96825	-0.0460239	4.01428	MAP4	-	-
chr19:14279572-14279633:mpeak_41724|chr19_14262427_14316997_ADGRL1_NM_-|	287.705	2.93841	1.02337	2.8713	0.00408787	0.184529	11.0967	6.52537	3.4196	0	0	565.932	755.855	538.018	401.446	594.763	1.3332	0.222888	2.95044	0.369941	2.5805	ADGRL1	-	-
chr1:17749831-17749883:mpeak_813|chr1_17735690_17766250_RCC2_NM_-|	1564.25	0.784778	0.352992	2.22322	0.0262011	0.297267	29.9611	33.7144	21.6575	30.7175	25.2435	2530.05	2473.11	3412.77	3682.92	3402.34	1.2727	0.739363	0.2993	-0.484243	0.783543	RCC2	-	-
chr17:54976471-54976527:mpeak_37343|chr17_54969590_54991409_TRIM25_NM_-|	565.702	1.9046	0.631148	3.01767	0.00254728	0.166046	9.98703	16.3134	5.69934	4.2369	2.46279	908.82	1223.51	1058.94	1163.03	1264.02	1.23342	0.355682	1.66982	-0.124178	1.794	TRIM25	-	-
chr3:33053490-33053656:mpeak_57013|chr3_33038836_33138694_GLB1_NM_-|	300.179	2.0101	0.836019	2.40437	0.0162002	0.247105	5.54835	9.78805	2.27974	0	2.46279	537.08	729.753	467.346	609.054	638.477	1.21061	0.276552	2.2782	0.148085	2.13011	GLB1	-	-
chr1:111999430-111999551:mpeak_4032|chr1_111991742_112003538_ATP5F1_NM_+|	357.234	1.83838	0.894058	2.05622	0.0397617	0.353179	5.54835	9.78805	3.4196	5.29612	0	436.1	862.436	665.683	811.365	772.699	1.18105	0.387409	1.40023	-0.207914	1.60814	ATP5F1	-	-
chr3:128345578-128345728:mpeak_59453|chr3_128339436_128369719_RPN1_NM_-|	349.952	2.14287	0.795217	2.69469	0.00704535	0.203115	6.65802	8.70049	5.69934	1.05922	0	655.815	715.615	707.858	633.416	764.695	1.11989	0.320924	1.76921	-0.0338402	1.80305	RPN1	-	-
chr1:225692690-225692740:mpeak_8289|chr1_225685514_225840845_ENAH_NM_-|	275.03	2.93978	1.10458	2.66144	0.00778067	0.203115	0	10.8756	1.13987	0	1.23139	401.701	570.97	565.375	593.165	605.845	1.11812	0.134396	2.78233	-0.27418	3.05651	ENAH	-	-
chr20:17936620-17936670:mpeak_51702|chr20_17923051_17949634_SNX5_NM_-|	654.828	1.81027	0.662985	2.73048	0.0063242	0.200035	17.7547	5.43781	5.69934	3.17767	4.92557	1081.93	1013.61	1232.2	1781.61	1401.94	1.10676	0.312576	1.33368	-0.490378	1.82406	SNX5	-	-
chr3:127831725-127831834:mpeak_59430|chr3_127800252_127842671_RUVBL1_NM_-|	309.262	2.62477	1.045	2.51173	0.012014	0.220256	11.0967	0	1.13987	1.05922	1.23139	451.636	593.808	539.158	743.575	749.918	1.06143	0.168769	2.27861	-0.374284	2.65289	RUVBL1	-	-
chr12:133373240-133373295:mpeak_22251|chr12_133349880_133405426_GOLGA3_NM_-|	493.332	2.81137	0.839015	3.3508	0.000805791	0.10486	9.98703	9.78805	4.55947	1.05922	0	810.059	1089.74	864.02	1066.64	1077.47	1.04091	0.186784	2.40034	-0.0780588	2.4784	GOLGA3	-	-
chr3:194369908-194369992:mpeak_61431|chr3_194362976_194393206_LSG1_NM_-|	308.344	2.15088	0.841048	2.55739	0.0105462	0.215362	6.65802	5.43781	3.4196	0	1.23139	587.016	590.546	591.592	672.607	624.932	1.02719	0.246198	1.96386	-0.0969577	2.06082	LSG1	-	-
chr4:39700465-39700523:mpeak_62694|chr4_39699663_39779979_UBE2K_NM_+|	605.684	3.44046	1.326	2.59461	0.00946994	0.209033	19.9741	0	3.4196	1.05922	0	958.755	997.293	1215.1	1397.12	1464.13	1.02114	0.109874	2.7419	-0.47437	3.21627	UBE2K	-	-
chr12:51784859-51784915:mpeak_18859|chr12_51748276_51785200_GALNT6_NM_-|	864.198	1.31596	0.522709	2.51757	0.0118168	0.220256	16.6451	18.4885	5.69934	7.41457	6.77266	1972.99	1580.23	1490.95	1863.17	1679.62	0.988782	0.395065	1.40602	0.0824584	1.32356	GALNT6	-	-
chr11:85437510-85437560:mpeak_15976|chr11_85406383_85522202_SYTL2_NM_-|	527.89	2.21976	0.827584	2.68222	0.00731355	0.203115	7.76769	9.78805	5.69934	0	1.84709	1182.91	644.924	1120.49	1304.96	1000.51	0.960468	0.220272	1.80304	-0.321412	2.12445	SYTL2	-	-
chr2:20511970-20512062:mpeak_45063|chr2_20451477_20550611_PUM2_NM_-|	285.412	1.74424	0.869884	2.00514	0.0449481	0.370034	9.98703	2.17512	0	1.05922	2.46279	590.345	705.827	511.801	512.664	517.801	0.938314	0.228366	2.37289	0.334168	2.03872	PUM2	-	-
chr19:19248324-19248382:mpeak_42047|chr19_19230992_19249310_TMEM161A_NM_-|	264.679	3.68793	1.32693	2.77929	0.00544775	0.197157	5.54835	6.52537	0	1.05922	0	755.686	536.168	371.597	534.908	435.297	0.934605	0.0789404	4.09575	0.530232	3.56552	TMEM161A	-	-
chr2:242255350-242255404:mpeak_51180|chr2_242254601_242291381_SEPT2_NM_+|	335.726	2.08185	0.870622	2.39122	0.0167925	0.247105	7.76769	3.26268	5.69934	0	0	619.196	613.384	720.397	656.719	730.831	0.894901	0.270374	1.53758	-0.189194	1.72677	SEPT2	-	-
chr3:186289873-186289935:mpeak_61257|chr3_186288464_186303132_DNAJB11_NM_+|	584.788	1.56889	0.776159	2.02135	0.0432439	0.365475	16.6451	2.17512	3.4196	4.2369	3.07848	1008.69	1172.39	995.105	1445.84	1196.3	0.862883	0.295141	1.39492	-0.152839	1.54776	DNAJB11	-	-
chr3:186300518-186300575:mpeak_61262|chr3_186288464_186303132_DNAJB11_NM_+|	584.388	2.16815	0.771646	2.80977	0.00495774	0.19687	14.4257	4.35024	1.13987	3.17767	2.46279	1008.69	1172.39	995.105	1445.84	1196.3	0.860856	0.186414	2.05442	-0.152839	2.20726	DNAJB11	-	-
chr1:155707636-155707759:mpeak_5897|chr1_155658881_155707947_DAP3_NM_+|	401.612	2.47652	0.974386	2.54162	0.011034	0.219046	6.65802	7.61293	0	3.17767	0.615696	593.674	1091.91	677.082	798.655	836.731	0.846647	0.16404	2.49649	0.128779	2.36771	DAP3	-	-
chr3:63821983-63822037:mpeak_58141|chr3_63819875_63849599_THOC7_NM_-|	769.125	1.86946	0.698356	2.67694	0.00742976	0.203115	18.8644	4.35024	4.55947	4.2369	2.46279	1324.95	1533.46	1410.02	1741.36	1646.99	0.812153	0.234645	1.6289	-0.16237	1.79127	THOC7	-	-
chr15:99417623-99417720:mpeak_30486|chr15_99191767_99500289_IGF1R_NM_+|	373.762	1.69909	0.809565	2.09877	0.0358374	0.33729	8.87736	4.35024	1.13987	1.05922	2.46279	735.711	899.413	686.201	642.949	755.459	0.808966	0.223633	2.08953	0.234586	1.85495	IGF1R	-	-
chr18:12351298-12351367:mpeak_39492|chr18_12329782_12377275_AFG3L2_NM_-|	431.971	3.50572	1.17119	2.99329	0.00275984	0.172375	3.32901	10.8756	0	1.05922	0.615696	925.465	878.749	711.278	971.308	817.029	0.787302	0.0670071	3.66916	0.114627	3.55453	AFG3L2	-	-
chr3:119395616-119395763:mpeak_59042|chr3_119388512_119396243_COX17_NM_-|	543.269	2.82164	1.23719	2.28069	0.022567	0.280168	15.5354	0	1.13987	3.17767	0	783.427	1218.07	1142.15	1069.82	1199.38	0.776189	0.126564	2.43224	-0.184298	2.61654	COX17	-	-
chr18:8609911-8609962:mpeak_39364|chr18_8609442_8638146_RAB12_NM_+|	662.314	1.97378	0.746196	2.64512	0.0081662	0.203115	8.87736	1.08756	5.69934	1.05922	3.69418	697.983	586.195	1635.71	1891.77	1791.06	0.775977	0.196534	0.516012	-1.46522	1.98124	RAB12	-	-
chr16:15170412-15170464:mpeak_31582|chr16_15155762_15188192_RRN3_NM_-|	406.572	3.43756	1.24331	2.76484	0.00569512	0.197157	11.0967	1.08756	1.13987	0	0.615696	601.441	983.155	795.628	852.675	818.876	0.768919	0.0711567	3.37997	-0.0537845	3.43376	RRN3	-	-
chr5:134688626-134688699:mpeak_68724|chr5_134670831_134735577_H2AFY_NM_-|	789.277	1.5388	0.783902	1.963	0.0496461	0.3897	15.5354	7.61293	9.11895	5.29612	0	1508.04	1559.56	1698.4	1612.14	1477.06	0.754605	0.301092	1.26829	-0.0572269	1.32552	H2AFY	-	-
chr8:66545144-66545201:mpeak_80596|chr8_66516820_66546452_ARMC1_NM_-|	471.002	2.73225	0.941432	2.90222	0.00370523	0.18265	4.43868	6.52537	2.27974	2.11845	0	875.53	617.735	1008.78	1128.07	1064.54	0.734233	0.137383	1.90276	-0.515269	2.41803	ARMC1	-	-
chr12:110753533-110753583:mpeak_21086|chr12_110719031_110784005_ATP2A2_NM_+|	421.823	5.18352	1.35026	3.83891	0.000123581	0.0600644	11.0967	1.08756	0	0	0	715.737	966.842	760.292	895.044	868.132	0.724142	0	Inf	0.000229101	Inf	ATP2A2	-	-
chr7:100274684-100274748:mpeak_77601|chr7_100271362_100276317_GNB2_NM_+|	649.769	5.03662	1.37174	3.67171	0.000240932	0.0678644	2.21934	11.9632	1.13987	0	0	802.292	1195.23	1201.42	1917.2	1366.23	0.710006	0.025416	4.22214	-0.581885	4.80402	GNB2	-	-
chr3:10008815-10008926:mpeak_56394|chr3_10005881_10028522_EMC3_NM_-|	414.306	3.26793	1.19441	2.73602	0.00621875	0.200035	3.32901	8.70049	0	2.11845	0	998.703	718.878	789.929	922.584	698.815	0.700374	0.087854	3.09046	0.095513	2.99495	EMC3	-	-
chr12:57991369-57991425:mpeak_19497|chr12_57984941_57995308_PIP4K2C_NM_+|	514.54	3.06852	1.03896	2.95345	0.00314248	0.177718	4.43868	8.70049	2.27974	1.05922	0	853.337	1050.58	819.565	1292.25	1113.18	0.690111	0.103534	2.56137	-0.175362	2.73673	PIP4K2C	-	-
chr20:47754974-47755106:mpeak_52840|chr20_47731430_47804904_STAU1_NM_-|	660.267	1.76561	0.787	2.24346	0.0248669	0.290619	8.87736	7.61293	4.55947	5.29612	0	975.4	1457.33	1200.28	1547.53	1395.78	0.677851	0.237851	1.32756	-0.183342	1.51091	STAU1	-	-
chr15:99263080-99263144:mpeak_30475|chr15_99191767_99500289_IGF1R_NM_+|	373.35	2.42073	1.01844	2.37689	0.0174593	0.251499	7.76769	3.26268	0	2.11845	0.615696	735.711	899.413	686.201	642.949	755.459	0.674589	0.131159	2.59728	0.234586	2.3627	IGF1R	-	-
chr6:150111156-150111205:mpeak_74350|chr6_150070830_150131751_PCMT1_NM_+|	572.371	1.83572	0.890599	2.06122	0.0392818	0.351798	12.2064	2.17512	3.4196	4.2369	0	968.742	1221.33	954.07	1273.19	1284.34	0.656667	0.218035	1.49442	-0.0961865	1.59061	PCMT1	-	-
chr16:24770937-24771081:mpeak_32036|chr16_24741048_24834752_TNRC6A_NM_+mpeak_32036|chr16_24741048_24834752_TNRC6A_NM_+||	455.946	3.88057	1.3329	2.91136	0.00359857	0.18265	11.0967	4.35024	1.13987	0	0	875.53	1476.91	632.627	798.655	759.154	0.656636	0.0520384	4.34535	0.687902	3.65744	TNRC6A	-	-
chr3:124533484-124533534:mpeak_59313|chr3_124482565_124606152_ITGB5_NM_-|	456.551	5.23834	1.32982	3.93914	8.17734e-05	0.0518083	6.65802	4.35024	0	0	0	682.447	994.031	889.097	960.716	1028.21	0.656631	0	Inf	-0.194684	Inf	ITGB5	-	-
chr20:47903583-47903633:mpeak_52866|chr20_47894714_47905581_ZFAS1_NR_+|	390.315	3.85978	1.41352	2.73062	0.00632157	0.200035	5.54835	5.43781	1.13987	0	0	506.01	1195.23	538.018	803.951	847.814	0.645774	0.0520539	3.85371	0.220761	3.63295	ZFAS1	-	-
chr8:87424038-87424108:mpeak_80996|chr8_87354993_87479022_WWP1_NM_+|	555.962	3.31195	1.13889	2.90805	0.00363694	0.18265	11.0967	6.52537	1.13987	0	0.615696	1569.07	1224.59	897.076	905.636	943.862	0.630786	0.0639183	3.91234	0.609489	3.30285	WWP1	-	-
chr16:9015032-9015165:mpeak_31290|chr16_8987961_9057341_USP7_NM_-|	1173.01	1.65541	0.606199	2.7308	0.00631815	0.200035	13.316	15.2259	6.83921	1.05922	5.54127	2005.17	2626.46	2056.32	2351.48	2648.73	0.616238	0.190458	1.67154	-0.022474	1.69402	USP7	-	-
chr16:56870507-56870579:mpeak_32834|chr16_56764016_56878410_NUP93_NM_+|	638.033	3.28313	1.05653	3.10747	0.00188693	0.143675	6.65802	6.52537	3.4196	0	0	998.703	1141.94	1032.72	1841.99	1348.37	0.615861	0.0809741	2.53178	-0.395291	2.92707	NUP93	-	-
chrX:102941250-102941306:mpeak_88026|chrX_102931979_102943086_MORF4L2_NM_-|	646.603	5.60624	1.32989	4.21556	2.49164e-05	0.0352127	3.32901	9.78805	0	0	0	937.671	1326.82	1200.28	1563.41	1424.72	0.579249	0	Inf	-0.302253	Inf	MORF4L2	-	-
chr17:58600174-58600384:mpeak_37843|chr17_58525195_58603601_APPBP2_NM_-|	1558.57	1.31551	0.474494	2.77245	0.00556355	0.197157	15.5354	14.1383	7.97908	5.29612	9.85114	2556.68	2575.34	3570.07	3414.94	3415.88	0.578206	0.22235	0.94461	-0.434144	1.37875	APPBP2	-	-
chr11:118918954-118919097:mpeak_16729|chr11_118916366_118927957_HYOU1_NM_-|	712.068	1.87976	0.861057	2.18308	0.02903	0.310604	2.21934	11.9632	3.4196	2.11845	1.84709	986.497	1529.11	1174.06	1785.85	1623.59	0.563781	0.161124	1.52638	-0.280582	1.80696	HYOU1	-	-
chr14:97006095-97006147:mpeak_27235|chr14_96968712_97031291_PAPOLA_NM_+|	423.405	4.55016	1.46253	3.11116	0.00186357	0.143675	0	10.8756	0	0	0	1145.18	893.975	984.846	565.626	633.551	0.533339	0	Inf	0.485946	Inf	PAPOLA	-	-
chr8:98667964-98668017:mpeak_81377|chr8_98656406_98736827_MTDH_NM_+|	733	1.62666	0.755784	2.15228	0.0313755	0.318402	7.76769	2.17512	1.13987	6.35534	1.84709	1049.75	902.676	1665.35	1814.45	1878.49	0.509255	0.174352	0.674839	-0.871543	1.54638	MTDH	-	-
chr5:72797215-72797282:mpeak_67108|chr5_72794249_72801016_BTF3_NM_+|	983.157	2.43414	0.848737	2.86795	0.00413139	0.184529	5.54835	13.0507	1.13987	0	3.07848	1596.82	2365.45	1628.87	2192.59	2025.03	0.469406	0.0721518	2.72544	0.0237156	2.70173	BTF3	-	-
chr3:63821008-63821074:mpeak_58140|chr3_63819875_63849599_THOC7_NM_-|	767.356	2.67006	0.926973	2.88041	0.00397164	0.18411	11.0967	2.17512	2.27974	0	1.23139	1324.95	1533.46	1410.02	1741.36	1646.99	0.464308	0.0731734	2.50332	-0.16237	2.66569	THOC7	-	-
chr17:57903246-57903371:mpeak_37681|chr17_57784862_57917128_VMP1_NM_+|	980.976	2.95429	0.878022	3.36471	0.000766253	0.10093	5.54835	9.78805	1.13987	3.17767	0	1703.34	1824.93	1927.52	2111.03	2223.28	0.434672	0.0689501	2.41364	-0.24266	2.6563	VMP1	-	-
chr5:179250253-179250303:mpeak_70176|chr5_179233387_179263435_SQSTM1_NM_+|	711.241	2.85516	1.09644	2.60404	0.00921329	0.206887	5.54835	5.43781	0	0	1.84709	1019.79	1629.17	1215.1	1901.31	1334.21	0.414736	0.0415018	3.15732	-0.163621	3.32095	SQSTM1	-	-
chr8:125551417-125551539:mpeak_82211|chr8_125551342_125562001_NDUFB9_NM_+|	1355.79	1.7411	0.722039	2.41137	0.0158928	0.244179	16.6451	7.61293	0	4.2369	4.30987	2424.63	3470.41	2128.13	2651.24	2850.67	0.411498	0.112015	2.08997	0.212772	1.8772	NDUFB9	-	-
chr1:113194527-113194581:mpeak_4097|chr1_113162074_113212613_CAPZA1_NM_+|	1031.85	2.28268	0.790389	2.88805	0.00387637	0.183069	5.54835	6.52537	0	1.05922	3.69418	1403.73	1619.38	2146.37	2456.34	2675.82	0.399381	0.0653072	1.9298	-0.68265	2.61245	CAPZA1	-	-
chr8:87410659-87410717:mpeak_80994|chr8_87354993_87479022_WWP1_NM_+|	555.125	4.43398	1.31156	3.38068	0.000723064	0.0999647	6.65802	4.35024	0	0	0	1569.07	1224.59	897.076	905.636	943.862	0.394044	0	Inf	0.609489	Inf	WWP1	-	-
chr20:39687952-39688061:mpeak_52334|chr20_39657461_39751834_TOP1_NM_+|	828.858	2.89807	1.22409	2.36753	0.0179072	0.253162	12.2064	0	0	0	1.84709	1195.12	2071.8	1611.77	1593.07	1802.76	0.373636	0.0368857	3.30927	-0.0312277	3.3405	TOP1	-	-
chr20:47359857-47359909:mpeak_52777|chr20_47242465_47444420_PREX1_NM_-|	735.281	4.61382	1.28212	3.59858	0.000319959	0.0719974	8.87736	5.43781	0	0	0	1882	2070.72	1117.07	1080.41	1188.29	0.36216	0	Inf	0.808322	Inf	PREX1	-	-
chr8:74205115-74205168:mpeak_80769|chr8_74202940_74205869_RPL7_NM_-|	756.926	2.54199	1.15369	2.20336	0.0275691	0.303541	11.0967	0	2.27974	1.05922	0	1276.12	1835.8	1204.84	1575.07	1663	0.356587	0.0751527	2.31762	0.0712669	2.24636	RPL7	-	-
chr3:161086696-161086835:mpeak_60637|chr3_161064143_161089871_SPTSSB_NM_-|	1986.56	3.60288	0.837692	4.30096	1.70057e-05	0.0324017	3.32901	13.0507	0	2.11845	1.84709	2430.18	2299.1	4823.92	5624.48	4667.59	0.346347	0.026234	2.63129	-1.09142	3.72271	SPTSSB	-	-
chr19:11229215-11229273:mpeak_41420|chr19_11200037_11241956_LDLR_NM_+|	795.025	2.96826	1.2141	2.44481	0.0144927	0.230879	7.76769	3.26268	1.13987	1.05922	0	1331.6	2188.17	1296.03	1612.14	1509.07	0.313383	0.0497843	2.91146	0.257301	2.65416	LDLR	-	-
chr20:52828516-52828569:mpeak_53146|chr20_52824501_52835557_PFDN4_NM_+|	1379.3	2.31356	0.857066	2.69939	0.00694662	0.203115	7.76769	8.70049	4.55947	1.05922	0.615696	2046.23	3213.74	2238.7	3310.07	2961.5	0.313085	0.0732572	1.98632	-0.109187	2.09551	PFDN4	-	-
chr19:16197109-16197159:mpeak_41811|chr19_16178316_16212073_TPM4_NM_+|	1134.85	2.78217	1.08085	2.57406	0.0100513	0.21109	0	10.8756	0	3.17767	0	2294.8	1946.73	2512.27	2402.32	2178.33	0.256408	0.0448006	2.36002	-0.156832	2.51685	TPM4	-	-
chr5:179130812-179131083:mpeak_70135|chr5_179125929_179155591_CANX_NM_+|	2274.56	1.47335	0.596331	2.47069	0.0134852	0.226979	12.2064	11.9632	6.83921	4.2369	1.84709	4635.09	5139.81	3951.92	4538.77	4442.86	0.247261	0.0999198	1.48819	0.180998	1.30719	CANX	-	-
chr18:3263115-3263239:mpeak_39331|chr18_3262110_3277762_MYL12B_NM_+|	1631.69	1.8498	0.908315	2.03652	0.0416983	0.359731	5.54835	7.61293	9.11895	0	0	2456.81	2871.16	3366.03	4197.7	3402.95	0.247022	0.0831513	1.11432	-0.456507	1.57083	MYL12B	-	-
chr16:68861123-68861185:mpeak_33198|chr16_68771194_68867192_CDH1_NM_+|	1988.11	3.60811	1.04198	3.46273	0.000534721	0.0909189	9.98703	4.35024	0	2.11845	0.615696	2503.42	3633.54	3609.96	4962.46	5154.61	0.233622	0.0199179	2.97557	-0.576462	3.55203	CDH1	-	-
chr12:48204328-48204401:mpeak_18499|chr12_48177669_48213763_HDAC7_NM_-|	1366.4	2.60544	1.01485	2.56731	0.010249	0.212605	2.21934	8.70049	1.13987	1.05922	0.615696	2740.89	2824.4	2360.67	2972.18	2752.16	0.196213	0.0348149	2.54081	0.0461674	2.49465	HDAC7	-	-
chr10:8103514-8103625:mpeak_9225|chr10_8096666_8115701_GATA3_NM_+|	7242.85	1.01045	0.410193	2.46335	0.0137646	0.226979	29.9611	22.8388	18.2379	14.8291	11.0825	13752.1	13830.5	14058	15880.9	14810	0.191424	0.0986607	0.843098	-0.113128	0.956226	GATA3	-	-
chr5:85916142-85916194:mpeak_67490|chr5_85913783_85916484_COX7C_NM_+|	1936.95	2.99393	0.98626	3.03564	0.00240025	0.161202	5.54835	9.78805	1.13987	0	1.23139	4028.1	4211.04	3440.12	4297.27	3375.25	0.186141	0.0213384	3.2782	0.153326	3.12487	COX7C	-	-
chr10:117958944-117959006:mpeak_12486|chr10_117824055_118033126_GFRA1_NM_-|	1303.68	3.00423	1.3645	2.20171	0.0276858	0.304206	11.0967	1.08756	0	0	0.615696	4223.41	3698.8	2057.46	1278.48	1765.82	0.153799	0.0120683	4.89162	1.21987	3.67175	GFRA1	-	-
chr12:46598307-46598356:mpeak_18430|chr12_46582854_46663208_SLC38A1_NM_-|	2031.21	2.41049	0.925366	2.60491	0.00918984	0.206791	7.76769	4.35024	0	4.2369	0	4493.06	3454.09	4365.7	3807.91	4175.04	0.152482	0.0343106	2.10103	-0.0508805	2.15191	SLC38A1	-	-
chr3:9511460-9511515:mpeak_56327|chr3_9439383_9517166_SETD5_NM_+|	1823.53	2.14426	0.945151	2.26869	0.0232871	0.283532	6.65802	4.35024	0	0	2.46279	3403.36	4265.41	3027.49	3894.77	3630.76	0.143547	0.0233373	2.74519	0.124375	2.62081	SETD5	-	-
chr19:40325400-40325456:mpeak_42973|chr19_40325202_40337054_FBL_NM_-|	2218.57	1.65319	0.843343	1.96028	0.0499628	0.390766	9.98703	3.26268	1.13987	0	3.07848	5763.63	4221.91	4002.08	4451.92	3728.66	0.132689	0.0346259	2.23617	0.298047	1.93813	FBL	-	-
chr20:43514408-43514536:mpeak_52483|chr20_43514239_43535022_YWHAB_NM_+|	4604.78	1.66287	0.640669	2.59552	0.00944487	0.209033	18.8644	5.43781	2.27974	6.35534	3.07848	9266.86	9205.12	8795.22	9971.53	8773.06	0.131563	0.0425332	1.63787	0.00878181	1.62909	YWHAB	-	-
chr20:46169405-46169462:mpeak_52656|chr20_46130600_46282149_NCOA3_NM_+|	3325.5	2.31309	0.819799	2.82154	0.00477944	0.194494	11.0967	7.61293	1.13987	4.2369	0	6937.66	8320.93	5799.65	5467.71	6704.93	0.122617	0.029917	2.38393	0.348809	2.03512	NCOA3	-	-
chr4:102099744-102099918:mpeak_63958|chr4_101947218_102268628_PPP3CA_NM_-|	6828.31	2.15176	0.725237	2.96698	0.00300739	0.177718	4.43868	11.9632	1.13987	0	6.15696	9727.37	9898.98	15192.2	15508.1	17932.8	0.0835706	0.0150039	1.75348	-0.724182	2.47766	PPP3CA	-	-
chr11:810581-810631:mpeak_13121|chr11_809935_812759_RPLP2_NM_+|	4232.79	1.73864	0.813416	2.13746	0.0325608	0.324138	3.32901	8.70049	2.27974	2.11845	1.23139	7863.12	9391.09	7443.34	8662.33	8950.38	0.0697192	0.0224679	1.68044	0.0467523	1.63369	RPLP2	-	-
chr4:102015269-102015325:mpeak_63950|chr4_101947218_102268628_PPP3CA_NM_-|	6828.02	1.39041	0.69511	2.00027	0.045471	0.371979	3.32901	7.61293	3.4196	2.11845	4.30987	9727.37	9898.98	15192.2	15508.1	17932.8	0.0557513	0.0202495	0.736939	-0.724182	1.46112	PPP3CA	-	-
chr1:115285589-115285641:mpeak_4337|chr1_115260837_115300671_CSDE1_NM_-|	15110.8	2.02482	0.85726	2.36196	0.0181785	0.255993	6.65802	6.52537	0	3.17767	1.23139	31333.8	33064	31519.6	23354.8	31818.6	0.0204718	0.00508583	2.16514	0.156058	2.00908	CSDE1	-	-
chr15:69113034-69113221:mpeak_29537|chr15_69072481_69113261_ANP32A_NM_-|	255.627	-2.24242	1.14444	-1.9594	0.0500658	0.391221	1.10967	1.08756	4.55947	2.11845	8.00405	433.881	562.269	498.122	528.553	516.569	0.220572	0.951371	-2.15532	-0.0465688	-2.10876	ANP32A	chr15:69112995:-;chr15:69113033:-	-
chr1:213345526-213345576:mpeak_7950|chr1_213224574_213445866_RPS6KC1_NM_+|	19.3951	-3.60626	1.84097	-1.9589	0.0501248	0.391221	0	0	0	0	6.15696	33.2901	41.3273	28.4967	43.4282	41.2517	0	5.44014	-Inf	-0.0160277	-Inf	RPS6KC1	-	-
chr3:9475104-9475178:mpeak_56312|chr3_9439383_9517166_SETD5_NM_+|	1824.82	1.47075	0.750819	1.95886	0.0501296	0.391221	9.98703	6.52537	5.69934	4.2369	0	3403.36	4265.41	3027.49	3894.77	3630.76	0.21532	0.0941554	1.31774	0.124375	1.19337	SETD5	-	-
chr7:155537650-155537774:mpeak_79120|chr7_155437202_155567686_RBM33_NM_+|	57.9655	1.72862	0.882732	1.95826	0.0501991	0.391481	9.98703	3.26268	1.13987	2.11845	2.46279	113.186	109.844	84.3503	146.173	107.131	5.94078	1.69437	1.79656	-0.0133463	1.80991	RBM33	-	-
chr10:3176663-3176777:mpeak_9042|chr10_3109711_3178641_PFKP_NM_+|	682.106	1.46751	0.749632	1.95764	0.0502717	0.391519	9.98703	5.43781	1.13987	5.29612	2.46279	1604.58	1037.53	1304.01	1549.64	1300.97	0.583806	0.21419	1.37854	-0.0680599	1.4466	PFKP	chr10:3176747:+;chr10:3176775:+	chr10_3134521_+;chr10_3134556_+;chr10_3134580_+
chr3:138254068-138254170:mpeak_59850|chr3_138213918_138313225_CEP70_NM_-|	15.2354	-3.40838	1.7413	-1.95738	0.0503032	0.391519	0	0	1.13987	1.05922	4.92557	15.5354	34.802	35.3359	27.5398	32.0162	0	7.50818	-Inf	-0.329694	-Inf	CEP70	-	chr3_138535212_-;chr3_138535261_-
chr20:46180457-46180511:mpeak_52660|chr20_46130600_46282149_NCOA3_NM_+|	3324.23	-3.01051	1.5381	-1.95729	0.0503128	0.391519	0	1.08756	3.4196	3.17767	3.69418	6937.66	8320.93	5799.65	5467.71	6704.93	0.00712753	0.0572629	-2.65732	0.348809	-3.00613	NCOA3	-	-
chr13:28225362-28225432:mpeak_22716|chr13_28194879_28239822_POLR1D_NM_+|	141.862	-1.55725	0.796385	-1.9554	0.0505362	0.39265	5.54835	2.17512	7.97908	9.53301	17.8552	231.921	290.379	205.176	319.886	328.166	1.47874	4.14512	-1.61013	-0.12309	-1.48704	POLR1D	-	chr13_27651288_+
chr6:3004952-3005095:mpeak_70360|chr6_3000049_3019712_NQO2_NM_+|	53.3306	1.82269	0.932141	1.95538	0.0505381	0.39265	5.54835	6.52537	0	1.05922	3.69418	96.5413	94.6178	69.532	127.107	128.681	6.31606	1.46115	1.9298	-0.18212	2.11192	NQO2	chr6:3005092:+	chr6_3004857_+
chrX:41602809-41602882:mpeak_87045|chrX_41379849_41782287_CASK_NM_-|	27.8938	1.67422	0.856344	1.95508	0.0505738	0.39265	4.43868	6.52537	0	4.2369	3.07848	44.3868	35.8895	63.8326	51.902	64.6481	13.6579	4.05548	1.16874	-0.583052	1.75179	CASK	chrX:41602812:-	chrX_41743561_-
chr3:63825339-63825455:mpeak_58142|chr3_63819875_63849599_THOC7_NM_-|	769.724	1.09757	0.561467	1.95483	0.0506036	0.39265	11.0967	11.9632	6.83921	3.17767	7.38836	1324.95	1533.46	1410.02	1741.36	1646.99	0.806739	0.362732	0.990826	-0.16237	1.1532	THOC7	-	chr3_63839762_-
chr1:113993186-113993501:mpeak_4133|chr1_113933474_114224833_MAGI3_NM_+|	102.372	1.2555	0.642495	1.9541	0.0506894	0.393034	24.4127	7.61293	6.83921	5.29612	7.38836	171.999	219.687	204.036	172.653	203.795	8.17636	3.36334	1.29897	0.0174013	1.28156	MAGI3	-	-
chr12:12351828-12351888:mpeak_17570|chr12_12274354_12419811_LRP6_NM_-|	74.1545	-1.01948	0.52183	-1.95366	0.0507415	0.393156	19.9741	25.0139	31.9163	40.2505	41.8673	100.98	157.696	91.1895	102.745	129.912	17.3916	35.2125	-0.756892	0.260802	-1.01769	LRP6	chr12:12351826:-	-
chr7:132938699-132938775:mpeak_78449|chr7_132937822_133749043_EXOC4_NM_+|	123.098	-1.04958	0.537322	-1.95335	0.0507783	0.393159	8.87736	15.2259	15.9582	25.4214	26.4749	204.179	274.065	202.897	243.621	214.262	5.03993	10.2688	-0.908256	0.118541	-1.0268	EXOC4	chr7:132938755:+	chr7_133253999_+
chr5:114615357-114615469:mpeak_68060|chr5_114603615_114632458_CCDC112_NM_-|	11.763	2.54922	1.30534	1.95292	0.0508288	NA	3.32901	13.0507	0	0	3.07848	18.8644	21.7512	19.3778	26.4806	11.6982	40.3287	5.34862	2.99658	0.0820161	2.91457	CCDC112	-	chr5_115279660_-;chr5_115279767_-
chr16:68057206-68057263:mpeak_33113|chr16_68056846_68112651_DUS2_NM_+|	35.9391	1.3849	0.709267	1.95258	0.0508692	0.393581	17.7547	11.9632	10.2588	3.17767	3.07848	67.6899	65.2537	55.8535	72.0272	52.3342	22.3538	9.16404	1.43252	0.146058	1.28646	DUS2	-	-
chrX:109497177-109497252:mpeak_88134|chrX_109441862_109683461_AMMECR1_NM_-|	60.4851	1.34884	0.691431	1.95079	0.0510819	0.39483	3.32901	9.78805	9.11895	6.35534	11.6982	49.9352	38.0646	141.344	153.587	181.63	14.9058	5.70179	-0.465741	-1.85213	1.38639	AMMECR1	chrX:109497179:-	-
chr2:240957838-240957895:mpeak_51117|chr2_240900603_240964819_NDUFA10_NM_-|	118.459	1.30317	0.668084	1.95061	0.0511038	0.39483	5.54835	16.3134	2.27974	3.17767	4.92557	272.979	238.176	231.393	202.312	207.49	4.27694	1.61932	1.65915	0.25796	1.40119	NDUFA10	chr2:240957838:-	chr2_240018421_-
chr15:31216683-31216733:mpeak_27837|chr15_31196054_31233768_FAN1_NM_+|	11.4873	-3.98029	2.04057	-1.95058	0.0511073	NA	0	0	0	0	7.38836	27.7418	18.4885	15.9582	24.3621	20.9337	0	12.0618	-Inf	0.178998	-Inf	FAN1	-	chr15_30924531_+
chr8:146112686-146112736:mpeak_82860|chr8_146108221_146126846_ZNF250_NM_-|	8.9793	-4.13087	2.11807	-1.9503	0.0511405	NA	0	0	0	0	6.15696	29.9611	11.9632	10.2588	14.8291	16.6238	0	14.7607	-Inf	0.592294	-Inf	ZNF250	-	chr8_144887301_-
chr1:117182785-117182836:mpeak_4418|chr1_117120184_117210377_IGSF3_NM_-|	792.707	1.73503	0.889935	1.94962	0.0512218	0.395342	9.98703	1.08756	0	0	3.07848	1623.45	1834.72	1490.95	1447.96	1515.84	0.320245	0.0691056	2.43193	0.219624	2.2123	IGSF3	-	chr1_116640167_-
chr19:11308155-11308207:mpeak_41436|chr19_11277287_11308243_KANK2_NM_-|	98.6863	1.14206	0.585841	1.94944	0.0512433	0.395342	19.9741	11.9632	15.9582	11.6515	11.0825	156.464	95.7054	254.191	198.075	211.8	12.665	5.82656	0.308161	-0.811972	1.12013	KANK2	-	chr19_11197492_-
chr14:55531238-55531306:mpeak_25530|chr14_55518361_55531333_MAPK1IP1L_NM_+|	292.058	0.939438	0.482684	1.94628	0.0516213	0.397974	11.0967	17.401	11.3987	14.8291	8.61975	426.113	451.338	652.005	641.89	685.886	3.24778	1.76017	0.294749	-0.588987	0.883736	MAPK1IP1L	chr14:55531269:+;chr14:55531303:+	chr14_55064584_+
chr3:48972409-48972508:mpeak_57630|chr3_48956280_49020631_ARIH2_NM_+|	295.891	1.41641	0.728257	1.94493	0.0517838	0.398942	5.54835	8.70049	0	6.35534	2.46279	496.023	618.822	538.018	659.896	623.085	1.2781	0.484247	1.27726	-0.122925	1.40019	ARIH2	chr3:48972509:+	chr3_48935101_+
chr13:113198860-113198922:mpeak_24156|chr13_113140465_113242499_TUBGCP3_NM_-|	149.758	1.12778	0.580138	1.94399	0.0518968	0.399405	16.6451	19.5761	15.9582	6.35534	12.3139	203.07	258.84	241.652	346.366	376.806	7.84162	3.58899	0.64988	-0.477695	1.12757	TUBGCP3	chr13:113198863:-	chr13_112544557_-
chr6:13810587-13810643:mpeak_70701|chr6_13791096_13814792_MCUR1_NM_-|	124.252	1.57552	0.810531	1.94381	0.0519179	0.399405	4.43868	8.70049	0	2.11845	3.07848	241.908	277.328	207.456	276.457	221.035	2.53048	0.737207	1.92311	0.143836	1.77927	MCUR1	chr6:13810587:-	chr6_13810361_-
chr8:95523201-95523359:mpeak_81248|chr8_95501088_95565746_KIAA1429_NM_-|	118.515	-1.11745	0.575141	-1.94291	0.0520269	0.399959	11.0967	6.52537	10.2588	12.7107	19.0866	239.689	283.853	222.274	183.246	196.407	3.36593	6.98691	-0.669969	0.38368	-1.05365	KIAA1429	chr8:95523206:-	-
chr15:68508754-68508812:mpeak_29508|chr15_68500748_68522080_CLN6_NM_-|	110.156	-3.04324	1.56757	-1.94137	0.0522135	0.400926	1.10967	0	7.97908	2.11845	2.46279	253.005	224.038	168.701	245.74	196.407	0.232615	2.05621	-2.91571	0.228268	-3.14397	CLN6	-	-
chr5:10286112-10286178:mpeak_65840|chr5_10280744_10308168_CMBL_NM_-|	136.802	-2.17197	1.11884	-1.94126	0.052227	0.400926	0	3.26268	12.5386	5.29612	1.23139	289.624	331.706	262.17	217.141	245.047	0.525113	2.63213	-1.96191	0.36362	-2.32553	CMBL	chr5:10286125:-	chr5_10286015_-
chr17:18235494-18235551:mpeak_35490|chr17_18232233_18266877_SHMT1_NM_-|	91.2341	1.63955	0.844909	1.9405	0.0523189	0.401347	5.54835	6.52537	1.13987	4.2369	1.84709	126.502	191.411	148.183	225.615	201.333	3.7978	1.25604	1.32599	-0.270293	1.59629	SHMT1	chr17:18235493:-	chr17_18332180_-
chr1:160302232-160302280:mpeak_6142|chr1_160260006_160313354_COPA_NM_-|	281.028	-2.998	1.5454	-1.93995	0.0523861	0.401577	1.10967	0	5.69934	2.11845	3.69418	656.925	563.357	458.227	618.587	500.561	0.0909356	0.729818	-2.78997	0.214651	-3.00462	COPA	-	-
chr17:59425794-59425856:mpeak_37901|chr17_58755171_59469337_BCAS3_NM_+|	641.811	-2.20799	1.13887	-1.93876	0.0525305	0.402399	2.21934	0	4.55947	4.2369	3.69418	1592.38	1312.69	1112.51	1170.44	1215.38	0.0763956	0.357042	-1.90767	0.316862	-2.22453	BCAS3	-	-
chr17:62481317-62481401:mpeak_38200|chr17_62474105_62493184_POLG2_NM_-|	8.04497	1.9397	1.00051	1.93871	0.0525367	NA	7.76769	14.1383	4.55947	5.29612	6.15696	3.32901	7.61293	10.2588	12.7107	8.61975	200.202	50.6899	1.03708	-0.944603	1.98169	POLG2	-	chr17_64485205_-
chr1:171492568-171492647:mpeak_6530|chr1_171454665_171560725_PRRC2C_NM_+|	155.257	1.34783	0.695777	1.93715	0.0527267	0.403034	15.5354	6.52537	6.83921	3.17767	1.23139	321.804	387.172	255.33	282.813	272.138	3.11164	1.38819	1.55674	0.392277	1.16446	PRRC2C	-	chr1_171523512_+
chr5:145831703-145831753:mpeak_69262|chr5_145826872_145890003_TCERG1_NM_+|	33.5985	-3.64374	1.88114	-1.93699	0.0527468	0.403034	0	0	0	0	7.38836	43.2771	77.2168	90.0496	54.0204	64.0324	0	3.55035	-Inf	-0.20337	-Inf	TCERG1	-	-
chr2:172582125-172582198:mpeak_49221|chr2_172543918_172604285_DYNC1I2_NM_+|	120.593	0.791725	0.408748	1.93695	0.0527513	0.403034	109.857	147.908	91.1895	74.1457	109.594	134.27	101.143	149.323	149.351	139.147	109.495	62.7949	0.491963	-0.310182	0.802145	DYNC1I2	-	chr2_171725620_+;chr2_171725662_+;chr2_171725698_+
chr10:126663064-126663121:mpeak_12807|chr10_126630691_126673342_ZRANB1_NM_+|	107.277	-1.32054	0.682009	-1.93625	0.0528371	0.403034	5.54835	6.52537	5.69934	8.47379	16.6238	264.102	228.388	155.022	185.364	197.023	2.45157	5.73063	-0.765954	0.459034	-1.22499	ZRANB1	chr10:126663119:+	chr10_124974550_+
chr11:66799088-66799161:mpeak_15165|chr11_66790189_66816054_SYT12_NM_+|	128.279	-2.29784	1.18683	-1.93611	0.0528537	0.403034	1.10967	1.08756	7.97908	9.53301	4.30987	280.747	150.083	275.848	270.102	281.989	0.51	2.6357	-2.72706	-0.357443	-2.36962	SYT12	chr11:66799152:+	chr11_67031680_+
chr5:96089763-96089874:mpeak_67659|chr5_96079243_96108971_CAST_NR_+mpeak_67659|chr5_95997740_96108343_CAST_NM_+||	147.565	1.09783	0.567044	1.93605	0.0528612	0.403034	18.8644	13.0507	13.6784	6.35534	7.38836	237.469	271.89	242.792	323.063	341.096	6.26573	3.02355	0.803863	-0.247377	1.05124	CAST	-	chr5_96754161_+
chr1:41213201-41213247:mpeak_2070|chr1_41157241_41236068_NFYC_NM_+|	162.436	-1.9544	1.00954	-1.93594	0.0528747	0.403034	3.32901	1.08756	14.8183	2.11845	6.77266	253.005	424.149	271.289	272.221	375.575	0.652226	2.57968	-1.8395	0.144249	-1.98375	NFYC	-	-
chr4:143575759-143575813:mpeak_64804|chr4_142950067_143767604_INPP4B_NM_-|	68.8968	-1.74943	0.904086	-1.93503	0.0529869	0.403605	1.10967	4.35024	9.11895	1.05922	11.6982	139.818	153.346	129.945	119.692	118.829	1.86241	5.93714	-1.41746	0.255139	-1.6726	INPP4B	-	-
chr4:68566760-68566814:mpeak_63196|chr4_68484850_68566889_UBA6_NM_-|	70.5534	2.09157	1.08163	1.93372	0.0531481	0.404547	29.9611	2.17512	3.4196	1.05922	3.69418	125.393	188.148	116.267	112.278	123.139	10.2495	2.32397	2.56022	0.419338	2.14089	UBA6	-	-
chr2:121043436-121043490:mpeak_48099|chr2_121010413_121050716_RALB_NM_+|	201.184	0.97333	0.503448	1.93333	0.0531957	0.404624	19.9741	13.0507	9.11895	12.7107	12.3139	287.405	348.02	485.584	383.439	440.223	5.19728	2.60788	0.536899	-0.457982	0.99488	RALB	-	-
chr17:59220193-59220253:mpeak_37885|chr17_58755171_59469337_BCAS3_NM_+|	642.37	-1.68888	0.874153	-1.93202	0.0533567	0.405564	2.21934	2.17512	6.83921	1.05922	8.00405	1592.38	1312.69	1112.51	1170.44	1215.38	0.151269	0.454573	-1.27053	0.316862	-1.58739	BCAS3	-	chr17_61142882_+
chr12:54366758-54366838:mpeak_19084|chr12_54357908_54368740_HOTAIR_NR_-|	35.38	-1.64621	0.852248	-1.93161	0.0534078	0.405666	2.21934	3.26268	10.2588	10.5922	9.85114	65.4706	48.9402	78.6509	51.902	72.6522	4.79153	15.109	-1.9006	-0.24375	-1.65685	HOTAIR	chr12:54366772:-	chr12_53972995_-
chr10:912522-912572:mpeak_8988|chr10_859153_977645_LARP4B_NM_-|	264.997	1.55896	0.807502	1.9306	0.0535327	0.406246	11.0967	1.08756	3.4196	2.11845	1.84709	423.894	547.043	512.941	575.159	571.366	1.2549	0.445031	1.30728	-0.188306	1.49559	LARP4B	-	chr10_866593_-
chr16:151549-151600:mpeak_30635|chr16_136869_188697_NPRL3_NM_-|	59.1518	-3.0348	1.57212	-1.93038	0.0535594	0.406246	1.10967	0	5.69934	8.47379	1.23139	116.515	110.931	113.987	112.278	121.292	0.487882	4.43223	-3.21019	-0.0267579	-3.18343	NPRL3	-	-
chr3:179336198-179336248:mpeak_60962|chr3_179322574_179341707_NDUFB5_NM_+|	170.533	2.20809	1.1453	1.92796	0.0538602	0.408241	11.0967	0	2.27974	0	1.23139	250.786	437.2	263.31	367.551	371.881	1.61293	0.350153	2.24509	0.0414629	2.20362	NDUFB5	-	-
chr3:71246912-71247088:mpeak_58350|chr3_71008542_71633140_FOXP1_NM_-|	938.489	-2.9358	1.52306	-1.92756	0.0539098	0.408331	0	1.08756	4.55947	5.29612	4.30987	1733.31	1786.86	1718.92	1894.95	2235.59	0.0308951	0.242167	-3.11825	-0.147698	-2.97055	FOXP1	chr3:71247033:-	chr3_71197887_-
chr1:113637061-113637111:mpeak_4122|chr1_113615791_113666496_LRIG2_NM_+|	38.3101	2.27826	1.18231	1.92695	0.0539863	0.408624	2.21934	11.9632	0	1.05922	1.23139	119.844	76.1293	47.8745	47.6651	75.1149	7.23695	1.34225	3.21527	0.784544	2.43072	LRIG2	-	-
chr6:144854274-144854405:mpeak_74217|chr6_144612872_145172124_UTRN_NM_+|	13.5745	2.28804	1.18769	1.92646	0.0540465	0.408793	4.43868	8.70049	1.13987	6.35534	0	14.4257	18.4885	25.0771	34.9544	22.1651	39.9194	9.11864	1.3948	-0.735403	2.1302	UTRN	-	-
chr2:91831185-91831261:mpeak_47290|chr2_91825059_91847975_LOC654342_NR_-|	49.1321	1.55658	0.808472	1.92533	0.0541877	0.409574	16.6451	6.52537	1.13987	2.11845	3.69418	119.844	114.194	55.8535	90.034	81.2719	9.90027	3.06062	2.32164	0.628002	1.69364	LOC654342	chr2:91831146:-;chr2:91831205:-	-
chr1:114248374-114248555:mpeak_4163|chr1_114240347_114301777_PHTF1_NM_-|	49.0157	-1.46815	0.762801	-1.92468	0.05427	0.409909	62.1415	84.8298	64.9725	116.515	120.676	7.76769	15.2259	7.97908	6.35534	3.69418	639.185	1676.02	-0.454833	0.935904	-1.39074	PHTF1	chr1:114248387:-;chr1:114248490:-	chr1_113705766_-
chrX:7199827-7199882:mpeak_86532|chrX_7137471_7267928_STS_NM_+|	3.93655	-4.59276	2.38662	-1.92438	0.054307	NA	0	0	0	2.11845	5.54127	3.32901	14.1383	4.55947	1.05922	8.61975	0	53.796	-Inf	0.879828	-Inf	STS	chrX:7199883:+	chrX_7281841_+
chr10:76431778-76431833:mpeak_11069|chr10_75910942_76468078_ADK_NM_+|	84.5653	1.70134	0.884353	1.92382	0.0543772	0.410432	8.87736	4.35024	0	2.11845	4.30987	107.638	182.71	136.784	193.838	205.027	4.55577	1.2001	1.626	-0.298541	1.92454	ADK	chr10:76431835:+	chr10_74672075_+
chr1:115291634-115291691:mpeak_4342|chr1_115260837_115300671_CSDE1_NM_-|	15113	-1.42506	0.741639	-1.92151	0.0546679	0.412089	0	8.70049	7.97908	7.41457	14.7767	31333.8	33064	31519.6	23354.8	31818.6	0.0135105	0.0348014	-1.209	0.156058	-1.36506	CSDE1	-	-
chr8:62556497-62556569:mpeak_80554|chr8_62416068_62627199_ASPH_NM_-|	32.4374	-3.10215	1.61447	-1.92147	0.0546731	0.412089	0	0	7.97908	0	4.30987	36.6191	32.6268	83.2104	70.968	88.6603	0	5.06054	-Inf	-1.22523	-Inf	ASPH	-	-
chr15:78577590-78577645:mpeak_29873|chr15_78575863_78592068_WDR61_NM_-|	96.6898	1.7627	0.917957	1.92025	0.0548267	0.412959	12.2064	3.26268	6.83921	0	1.84709	129.831	209.899	169.84	194.897	238.274	4.55333	1.44049	1.41753	-0.242833	1.66037	WDR61	-	-
chr9:116130854-116131029:mpeak_85135|chr9_116111811_116131895_BSPRY_NM_+|	353.783	-1.26451	0.658697	-1.91971	0.0548949	0.413184	4.43868	6.52537	4.55947	13.7699	18.4709	670.241	736.279	720.397	670.489	692.658	0.779516	1.76623	-1.16197	0.0180529	-1.18003	BSPRY	chr9:116130908:+;chr9:116131032:+	chr9_113368626_+;chr9_113368749_+
chr7:17899625-17899679:mpeak_75576|chr7_17833916_17980131_SNX13_NM_-|	19.4079	-3.75063	1.95446	-1.91902	0.0549824	0.413435	0	0	0	0	8.61975	28.8514	36.9771	41.0353	39.1913	39.4046	0	7.20527	-Inf	-0.276846	-Inf	SNX13	-	-
chr17:59866941-59867004:mpeak_37950|chr17_59761501_59940920_BRIP1_NM_-|	252.5	1.53582	0.800389	1.91884	0.0550048	0.413435	3.32901	7.61293	3.4196	2.11845	1.84709	460.513	418.711	453.668	521.138	652.638	1.2445	0.453788	1.15213	-0.303342	1.45548	BRIP1	chr17:59866949:-	chr17_61789584_-
chr1:193057710-193057764:mpeak_7185|chr1_193028551_193060780_TROVE2_NM_+|	67.8187	1.55245	0.809717	1.91727	0.0552032	0.414568	7.76769	7.61293	1.13987	3.17767	8.00405	113.186	65.2537	134.504	188.542	148.998	8.61949	2.61026	0.904888	-0.818522	1.72341	TROVE2	-	-
chr13:46080591-46080687:mpeak_23264|chr13_46039029_46108836_COG3_NM_+|	37.3436	-3.57743	1.86669	-1.91646	0.055307	0.414568	0	1.08756	0	2.11845	16.0081	69.9092	71.779	72.9516	73.0864	66.4952	0.767573	8.52881	-3.47397	-5.52425e-06	-3.47397	COG3	-	-
chr2:174091818-174091878:mpeak_49277|chr2_173940564_174130777_ZAK_NM_+|	150.641	0.980975	0.511911	1.9163	0.0553271	0.414568	85.4446	77.2168	60.413	108.041	63.4167	144.257	147.908	221.134	359.077	239.506	55.6744	28.2867	0.0735152	-0.903378	0.976893	ZAK	chr2:174091874:+	chr2_173227168_+
chr6:83984619-83984675:mpeak_72877|chr6_83921813_84140938_ME1_NM_-|	152.056	-3.06611	1.60014	-1.91615	0.0553458	0.414568	1.10967	0	5.69934	3.17767	4.30987	195.302	426.324	254.191	341.07	289.377	0.178511	1.49065	-2.98594	0.075922	-3.06186	ME1	chr6:83984619:-	chr6_83274898_-
chrX:10067775-10067825:mpeak_86566|chrX_9983794_10109474_WWC3_NM_+|	126.185	-3.23515	1.68851	-1.91597	0.0553685	0.414568	0	0	0	0	6.77266	185.315	201.199	219.995	343.189	305.385	0	0.77975	-Inf	-0.583157	-Inf	WWC3	-	-
chr1:85740086-85740180:mpeak_3164|chr1_85733665_85742587_BCL10_NM_-|	22.7458	-2.60029	1.35727	-1.91582	0.0553881	0.414568	2.21934	0	3.4196	10.5922	6.15696	22.1934	59.8159	34.196	32.8359	56.0284	2.70621	16.3894	-2.59896	-0.000544642	-2.59842	BCL10	chr1:85740129:-	chr1_85274389_-;chr1_85274447_-
chr14:64565420-64565513:mpeak_25920|chr14_64319682_64692036_SYNE2_NM_+|	34.5816	-3.06547	1.60032	-1.91554	0.0554242	0.414568	0	1.08756	6.83921	2.11845	3.07848	56.5932	91.3551	55.8535	59.3165	69.5737	0.735095	6.51504	-2.88324	0.26453	-3.14777	SYNE2	-	chr14_64098786_+
chr1:100320270-100320431:mpeak_3529|chr1_100315639_100387089_AGL_NM_+|	29.2356	2.83317	1.47954	1.9149	0.0555051	0.414822	0	10.8756	0	0	2.46279	67.6899	23.9263	59.2732	67.7903	60.3382	11.8708	1.31417	2.7277	-0.447496	3.17519	AGL	-	-
[truncated: 10,180 more rows]
