# Supplementary material for: Compartment-specific and ELAVL1-coordinated regulation of intronic polyadenylation isoforms by doxorubicin
Source: HighWire-hosted journal article supplement (doi:10.1101/gr.276192.121), 2022-07-01
Supplement: Supplemental_Table_S19.xlsx.xlsx [file Supplemental_Table_S19.xlsx.xlsx]

## Sheet: Sheet1
Supplemental Table S19 : List of IPA isoforms regulated by ELAVL1 depletion in MCF-7 cytosol with doxorubicin treatment by 3’-seq analysis.
IPA peaks	baseMean	log2FoldChange IPA:LE	lfcSE	stat	pvalue	padj	5	25	2	12	22	LE.05	LE.25	LE.02	LE.12	LE.22	%IPA (siELAVL1)	%IPA (siCTL)	log2FC_IPA	log2FC_LE	log2FC IPA-logFC LE	gene	Tian polyA site	Zavolan polyA site
chrX:152995301-152995357:mpeak_75808|chrX_152990322_153008942_ABCD1_NM_+|	7.63573	2.62241	1.09292	2.39945	0.0164197	0.327504	6.76617	11.0757	0.992077	2.15545	3.32695	6.76617	8.86053	9.92077	11.855	14.6386	114.175	17.78	2.04739	-0.635529	2.68292	ABCD1	chrX:152995352:+	chrX_153729896_+
chrX:109497179-109497252:mpeak_75248|chrX_109441862_109683461_AMMECR1_NM_-|	46.8002	2.10984	0.783751	2.69198	0.00710297	0.258208	13.5323	8.86053	2.97623	5.38862	8.65006	32.7032	64.2388	91.2711	123.938	116.443	23.0992	5.13034	0.981203	-1.18952	2.17072	AMMECR1	chrX:109497179:-	-
chrX:10076270-10076382:mpeak_73772|chrX_9983794_10109474_WWC3_NM_+|	135.471	1.43597	0.428771	3.34904	0.000810933	0.122351	40.597	47.6254	32.7386	33.4094	27.9463	136.451	167.243	255.956	278.053	334.691	29.0498	10.8316	0.492	-0.931278	1.42328	WWC3	chrX:10076381:+	chrX_10108281_+;chrX_10108339_+
chr9:97784396-97784584:mpeak_71984|chr9_97488950_97848963_C9orf3_NM_+|	63.8716	1.37141	0.688808	1.99099	0.0464816	0.441473	92.471	57.5934	38.691	58.1971	57.2235	55.2571	36.5497	57.5405	61.4303	123.762	163.457	63.4901	0.54657	-0.817736	1.36431	C9orf3	chr9:97784453:+;chr9:97784562:+	chr9_95022183_+;chr9_95022279_+
chr9:134086655-134086759:mpeak_73282|chr9_134000947_134108840_NUP214_NM_+|	41.2069	2.26924	0.810001	2.80153	0.00508617	0.230648	11.277	12.1832	0	4.3109	3.32695	60.8956	85.2826	73.4137	94.8397	66.5389	16.049	3.25302	2.20394	-0.0986949	2.30264	NUP214	chr9:134086756:+	chr9_131211369_+
chr9:128283741-128283829:mpeak_72956|chr9_128201291_128469513_MAPKAP1_NM_-|	289.867	0.953856	0.440481	2.16549	0.0303503	0.388783	43.9801	77.5296	33.7306	34.4872	33.2695	535.655	487.329	491.078	632.624	528.984	11.878	6.14074	0.844736	-0.107066	0.951803	MAPKAP1	chr9:128283747:-	chr9_125521472_-
chr9:126331611-126331752:mpeak_72866|chr9_126144904_126692417_DENND1A_NM_-|	31.5145	2.20464	1.10119	2.00204	0.0452799	0.439615	18.0431	21.0438	1.98415	7.54407	1.33078	63.151	56.4859	54.5643	74.3629	16.6347	32.6713	7.46005	2.43276	0.301991	2.13076	DENND1A	chr9:126331614:-;chr9:126331696:-	chr9_123569338_-
chr9:116355157-116355293:mpeak_72613|chr9_116207008_116359047_RGS3_NM_+|	11.7736	2.13971	0.902936	2.36973	0.0178011	0.334243	28.1924	22.1513	7.93662	7.54407	9.31545	5.63848	7.75296	4.96039	12.9327	11.3116	375.939	84.9046	1.60666	-0.539926	2.14659	RGS3	chr9:116355208:+;chr9:116355283:+	chr9_113592927_+;chr9_113593003_+
chr8:90733135-90733281:mpeak_69176|chr8_90729956_90769939_LOC101929709_NR_-|	2.87252	8.95315	3.00925	2.97521	0.0029279	0.178361	6.76617	7.75296	0.992077	0	0	0	0	0	3.23317	9.98084	#DIV/0!	7.50777	4.45632	-Inf	Inf	LOC101929709	chr8:90733132:-;chr8:90733228:-	chr8_89720900_-;chr8_89721000_-
chr8:23085787-23085841:mpeak_67904|chr8_23082733_23087460_LOC389641_NR_+|	11.8805	6.38832	1.49288	4.27918	1.87584e-05	0.0212295	5.63848	14.3984	0	0	0	12.4047	19.9362	19.8415	22.6322	23.954	61.9552	0	Inf	-0.453466	Inf	LOC389641	chr8:23085844:+	chr8_23228328_+
chr8:143852607-143852671:mpeak_70407|chr8_143846159_143859264_LYNX1_NM_-|	9.6284	4.9183	1.6858	2.91748	0.00352868	0.193906	22.5539	13.2908	15.8732	17.2436	11.977	0	0	3.96831	5.38862	5.9885	#DIV/0!	293.858	0.253793	-Inf	Inf	LYNX1	chr8:143852620:-	chr8_142771203_-
chr7:91974407-91974475:mpeak_65876|chr7_91875547_92027525_ANKIB1_NM_+|	110.427	1.58753	0.692774	2.29156	0.0219313	0.355023	7.89387	8.86053	0.992077	4.3109	7.98467	157.877	141.768	284.726	240.332	249.521	5.5914	1.71547	0.919417	-0.785192	1.70461	ANKIB1	chr7:91974458:+	chr7_92345143_+
chr7:51200354-51200413:mpeak_65096|chr7_51085265_51384515_COBL_NM_-|	49.9176	1.64622	0.713609	2.3069	0.0210605	0.350047	10.1493	14.3984	0.992077	3.23317	6.65389	98.1095	86.3902	89.287	103.461	86.5006	13.305	3.89586	1.75898	-0.0129713	1.77195	COBL	chr7:51200357:-	chr7_51132666_-
chr7:44873760-44874164:mpeak_65014|chr7_44869762_44887725_H2AFV_NM_-|	2786.3	0.948308	0.352382	2.69114	0.00712092	0.258208	5070.12	5266.48	5509.01	5686.07	5914.64	43.9801	55.3783	127.978	86.2179	103.135	10403.3	5391.75	-0.142092	-1.09031	0.94822	H2AFV	chr7:44873769:-;chr7:44873827:-;chr7:44873865:-;chr7:44873906:-;chr7:44873938:-	chr7_44834164_-;chr7_44834230_-;chr7_44834292_-;chr7_44834515_-
chr7:135065867-135065919:mpeak_66917|chr7_135047938_135194875_CNOT4_NM_-|	11.4804	4.95766	1.93744	2.55887	0.0105013	0.291119	0	11.0757	0	0	0	15.7877	27.6892	19.8415	29.0985	11.3116	25.4748	0	Inf	0.114209	Inf	CNOT4	chr7:135065868:-	-
chr7:116409882-116409963:mpeak_66562|chr7_116312458_116435940_MET_NM_+|	47.8331	2.29287	0.805805	2.84544	0.00443504	0.216531	5.63848	15.5059	6.94454	5.38862	10.6462	28.1924	38.7648	129.962	154.115	83.1736	31.579	6.25715	0.464898	-1.87049	2.33539	MET	chr7:116409934:+;chr7:116409960:+	chr7_116769904_+
chr6:157191590-157191644:mpeak_63560|chr6_157099063_157527300_ARID1B_NM_+|	42.9096	3.76338	1.44562	2.6033	0.00923317	0.278041	1.1277	9.9681	0	1.07772	0	108.259	84.175	77.382	59.2748	87.8314	5.76603	0.48008	3.94892	0.362685	3.58623	ARID1B	chr6:157191647:+	-
chr6:111345482-111345534:mpeak_62617|chr6_111303219_111346605_RPF2_NM_+|	83.0566	1.83755	0.707556	2.59704	0.00940307	0.27863	11.277	8.86053	2.97623	3.23317	2.66156	168.027	146.199	141.867	163.814	181.651	6.40861	1.82031	1.76768	-0.0481435	1.81583	RPF2	chr6:111345516:+	chr6_111024282_+;chr6_111024324_+
chr5:148928888-148928977:mpeak_59034|chr5_148876423_148931115_CSNK1A1_NM_-|	102.701	1.56021	0.614719	2.53809	0.011146	0.292288	21.4262	12.1832	11.9049	5.38862	7.31928	162.388	145.091	197.423	195.068	268.817	10.9306	3.72184	1.03442	-0.519872	1.55429	CSNK1A1	chr5:148928908:-	chr5_149549330_-
chr4:71826373-71826423:mpeak_53736|chr4_71768056_71847696_MOB1B_NM_+|	19.7792	2.36454	1.18931	1.98816	0.0467935	0.441473	3.38309	7.75296	0	3.23317	0.665389	34.9586	34.3346	40.6752	21.5545	51.235	16.0709	3.43593	2.09919	-0.126496	2.22568	MOB1B	chr4:71826424:+	chr4_70960706_+
chr4:152624488-152624545:mpeak_55248|chr4_152592454_152682175_GATB_NM_-|	29.3121	1.74716	0.865478	2.01872	0.0435159	0.433276	7.89387	7.75296	2.97623	1.07772	2.66156	57.5125	50.9481	55.5563	66.8189	39.9233	14.4263	4.13775	1.80526	0.00348246	1.80178	GATB	chr4:152624496:-	chr4_151703344_-
chr4:107114721-107114785:mpeak_54519|chr4_106967837_107237861_TBCK_NM_-|	19.6583	2.59895	0.948485	2.74011	0.00614187	0.244721	9.02157	12.1832	3.96831	3.23317	0.665389	18.0431	36.5497	42.6593	32.3317	37.9272	38.8417	6.96687	2.01549	-0.463533	2.47902	TBCK	chr4:107114731:-	-
chr3:9882934-9883066:mpeak_47830|chr3_9879891_9885702_RPUSD3_NM_-|	133.119	0.885335	0.439002	2.0167	0.0437269	0.434517	38.3417	45.4102	20.8336	31.254	25.2848	206.368	227.051	209.328	279.13	248.19	19.3235	10.5033	0.699265	-0.180251	0.879516	RPUSD3	chr3:9882941:-;chr3:9883004:-	chr3_9841245_-
chr3:53897043-53897093:mpeak_49190|chr3_53880576_53898772_IL17RB_NM_+|	13.5571	5.2288	1.63818	3.19184	0.00141368	0.153138	4.51078	7.75296	0	0	0	15.7877	33.227	39.6831	22.6322	11.977	25.0205	0	Inf	-0.0150348	Inf	IL17RB	chr3:53897073:+;chr3:53897122:+	chr3_53863037_+
chr3:41923637-41923696:mpeak_48651|chr3_41288483_42003660_ULK4_NM_-|	4.28959	5.50036	2.09457	2.62601	0.00863921	0.274847	13.5323	9.9681	3.96831	2.15545	4.65772	0	0	5.95246	0	2.66156	#DIV/0!	125.162	1.7091	-Inf	Inf	ULK4	chr3:41923645:-	chr3_41882154_-
chr3:37210795-37210845:mpeak_48496|chr3_37095452_37217851_LRRFIP2_NM_-|	48.4773	2.11153	1.02299	2.06408	0.0390104	0.419814	4.51078	7.75296	0	0	2.66156	98.1095	116.294	83.3345	68.9743	103.135	5.71992	1.04193	2.78902	0.332286	2.45673	LRRFIP2	chr3:37210791:-	chr3_37169304_-
chr3:196745777-196746029:mpeak_52353|chr3_196730322_196756687_MFI2_NM_-|	37.5064	1.65689	0.828568	1.9997	0.0455328	0.439655	11.277	15.5059	2.97623	10.7772	5.9885	65.4063	34.3346	99.2077	74.3629	55.2273	26.8525	8.62856	1.02501	-0.612855	1.63786	MFI2	chr3:196745781:-;chr3:196745824:-;chr3:196745885:-;chr3:196745970:-	chr3_197018912_-;chr3_197018954_-;chr3_197019015_-;chr3_197019103_-
chr3:195967835-195967886:mpeak_52241|chr3_195965765_196014584_PCYT1A_NM_-|	5.63701	5.59929	1.62236	3.45133	0.000557832	0.0963625	5.63848	6.6454	0	1.07772	0	4.51078	4.43027	12.897	11.855	9.31545	137.387	3.1635	4.09567	-1.34491	5.44058	PCYT1A	chr3:195967828:-	-
chr3:169861452-169861534:mpeak_51546|chr3_169815172_169899537_PHC3_NM_-|	86.8435	1.31919	0.522877	2.52294	0.0116377	0.296652	42.8524	22.1513	22.8178	24.7876	23.954	92.471	103.004	152.78	171.358	212.259	33.2543	13.3408	0.446344	-0.871357	1.3177	PHC3	chr3:169861475:-	-
chr3:150282846-150283065:mpeak_51134|chr3_150264573_150301632_EIF2A_NM_+|	46.6372	1.57606	0.778982	2.02323	0.0430492	0.432491	9.02157	14.3984	3.96831	6.46634	2.66156	63.151	103.004	68.4533	89.4511	105.797	14.0953	4.9663	1.42355	-0.0814156	1.50497	EIF2A	chr3:150282897:+;chr3:150282988:+;chr3:150283067:+	chr3_150565119_+;chr3_150565200_+;chr3_150565278_+
chr21:47967065-47967123:mpeak_46335|chr21_47878861_47987282_DIP2A_NM_+|	22.4821	1.61908	0.783811	2.06566	0.038861	0.419814	11.277	15.5059	5.95246	1.07772	7.98467	29.3201	35.4421	34.7227	40.9535	42.5849	41.3557	12.6964	1.41988	-0.283789	1.70367	DIP2A	chr21:47967120:+	chr21_46547168_+;chr21_46547206_+
chr21:47809510-47809568:mpeak_46325|chr21_47744035_47865196_PCNT_NM_+|	17.0227	1.97814	0.983373	2.01159	0.0442634	0.437728	14.66	11.0757	2.97623	0	5.32311	36.0863	21.0438	18.8495	26.9431	33.2695	45.0476	10.4973	2.21766	0.116227	2.10144	PCNT	chr21:47809561:+	chr21_46389650_+
chr2:75136680-75136730:mpeak_39786|chr2_75136257_75165434_LINC01291_NR_+|	18.2738	3.62539	1.54158	2.35174	0.018686	0.338816	3.38309	8.86053	0	0	0	60.8956	53.1632	28.7702	9.69951	17.9655	10.7345	0	Inf	1.60007	Inf	LINC01291	chr2:75136729:+	chr2_74909603_+
chr2:70451551-70451681:mpeak_39540|chr2_70439977_70475779_TIA1_NM_-|	47.2463	2.32156	0.659227	3.52164	0.000428892	0.0858621	30.4478	25.474	14.8812	31.254	20.6271	29.3201	21.0438	125.994	100.228	73.1928	111.036	22.2976	0.329342	-1.98672	2.31607	TIA1	chr2:70451556:-;chr2:70451614:-	chr2_70224425_-;chr2_70224484_-
chr2:46072845-46072920:mpeak_38923|chr2_45879042_46411873_PRKCE_NM_+|	20.2463	3.11442	1.39327	2.23534	0.0253953	0.370205	45.1078	59.8086	14.8812	28.0208	25.2848	1.1277	3.3227	0	12.9327	11.977	2357.46	273.736	1.20664	-1.89974	3.10638	PRKCE	chr2:46072897:+	chr2_45845757_+
chr2:44458505-44458616:mpeak_38895|chr2_44395941_44459454_PPM1B_NM_+|	44.7683	1.53462	0.671708	2.28465	0.0223333	0.357333	66.534	66.454	30.7544	61.4303	34.6002	14.66	35.4421	43.6514	49.5753	44.5811	265.434	92.0013	0.653876	-0.87475	1.52863	PPM1B	chr2:44458530:+;chr2:44458585:+;chr2:44458611:+	chr2_44231392_+;chr2_44231485_+
chr2:26508326-26508451:mpeak_38334|chr2_26467615_26512785_HADHB_NM_+|	81.3924	1.88892	0.785417	2.40499	0.0161727	0.327504	15.7877	9.9681	3.96831	1.07772	2.66156	143.217	223.728	111.113	157.348	145.055	7.01898	1.86392	2.32551	0.412589	1.91292	HADHB	chr2:26508399:+	chr2_26285519_+
chr2:25671283-25671334:mpeak_38283|chr2_25600422_25896516_DTNB_NM_-|	15.0107	3.216	1.61009	1.99741	0.0457808	0.440449	1.1277	9.9681	0	0	0.665389	33.8309	43.1951	12.897	20.4768	27.9463	14.4053	1.08511	4.64463	0.913947	3.73069	DTNB	chr2:25671283:-	-
chr2:202597761-202597811:mpeak_42488|chr2_202566612_202645895_ALS2_NM_-|	21.6109	3.40552	1.31032	2.59901	0.00934932	0.278041	9.02157	6.6454	1.98415	0	0	32.7032	57.5934	25.794	43.109	39.258	17.3506	1.83445	3.56609	0.324527	3.24156	ALS2	chr2:202597755:-	chr2_201733035_-
chr2:191799920-191800022:mpeak_42203|chr2_191745546_191827555_GLS_NM_+|	92.4381	1.63507	0.701291	2.33152	0.019726	0.344105	157.877	242.557	107.144	191.835	109.789	11.277	16.6135	20.8336	25.8654	40.5887	1435.74	468.3	0.555245	-1.06105	1.61629	GLS	chr2:191799979:+;chr2:191800015:+	chr2_190935288_+
chr2:169745897-169746052:mpeak_41652|chr2_169728065_169746944_SPC25_NM_-|	29.9654	1.93228	0.813402	2.37555	0.0175229	0.333219	22.5539	9.9681	13.8891	7.54407	7.31928	31.5755	23.2589	40.6752	82.9847	59.885	59.3095	15.6651	0.762695	-1.15802	1.92071	SPC25	chr2:169745897:-	-
chr2:160963055-160963243:mpeak_41521|chr2_160958345_161056824_ITGB6_NM_-|	86.2494	2.8338	1.21612	2.3302	0.0197953	0.344105	5.63848	0	0.992077	5.38862	4.65772	18.0431	37.6573	144.843	250.032	395.241	10.1229	1.39706	-0.384193	-3.24134	2.85715	ITGB6	chr2:160963133:-	chr2_160106619_-
chr2:131127908-131128007:mpeak_41025|chr2_131113579_131130729_PTPN18_NM_+|	80.1304	1.50331	0.679768	2.21151	0.0270008	0.377745	45.1078	45.4102	44.6435	24.7876	12.6424	102.62	75.3145	152.78	156.27	141.728	50.8715	18.2071	0.726251	-0.756105	1.48236	PTPN18	chr2:131127962:+;chr2:131127995:+	chr2_130370419_+
chr2:131123204-131123254:mpeak_41024|chr2_131113579_131130729_PTPN18_NM_+|	64.296	4.14636	1.20834	3.43144	0.000600376	0.0980566	4.51078	7.75296	1.98415	0	0	102.62	75.3145	152.78	156.27	141.728	6.89227	0.440163	3.21277	-0.756105	3.96887	PTPN18	chr2:131123256:+	chr2_130365681_+
chr19:337234-337300:mpeak_34581|chr19_306711_344791_MIER2_NM_-|	12.1813	2.37739	1.14261	2.08066	0.0374653	0.416713	20.2985	23.2589	21.8257	10.7772	11.3116	5.63848	0	8.9287	6.46634	13.3078	772.503	152.997	0.573182	-1.76285	2.33603	MIER2	chr19:337237:-	chr19_337247_-
chr19:23452683-23452747:mpeak_35986|chr19_23442918_23457053_IPO5P1_NR_-|	10.4196	2.53365	1.28163	1.97689	0.0480539	0.444665	22.5539	11.0757	4.96039	2.15545	1.33078	22.5539	3.3227	11.9049	9.69951	14.6386	129.961	23.3055	2.57825	0.0989087	2.47934	IPO5P1	chr19:23452691:-	chr19_23269890_-
chr19:18053454-18053506:mpeak_35718|chr19_18043823_18054316_CCDC124_NM_+|	101.011	1.76315	0.751591	2.34589	0.0189818	0.339439	14.66	6.6454	6.94454	1.07772	2.66156	183.814	180.533	244.051	199.379	170.34	5.84756	1.74069	1.58076	-0.167419	1.74818	CCDC124	chr19:18053520:+	chr19_17942659_+
chr19:1393764-1393900:mpeak_34681|chr19_1383882_1395389_NDUFS7_NM_+|	124.006	1.50932	0.652392	2.31352	0.0206941	0.348782	9.02157	16.6135	9.92077	1.07772	4.65772	226.667	210.438	256.948	247.876	256.84	5.86474	2.05553	1.29634	-0.216216	1.51256	NDUFS7	chr19:1393803:+;chr19:1393892:+	chr19_1393890_+
chr17:6553449-6553691:mpeak_29704|chr17_6547979_6554954_MED31_NM_-|	55.4811	1.03393	0.501998	2.05963	0.0394343	0.419814	82.3218	73.0994	79.3662	89.4511	69.8659	19.1708	19.9362	32.7386	40.9535	47.908	397.425	196.285	-0.0339511	-1.05168	1.01773	MED31	chr17:6553528:-;chr17:6553636:-	chr17_6650209_-;chr17_6650314_-
chr17:12862312-12862365:mpeak_29965|chr17_12692828_12893348_ARHGAP44_NM_+|	43.3409	1.6132	0.791183	2.03897	0.0414527	0.425693	18.0431	14.3984	8.9287	6.46634	1.99617	74.4279	75.3145	75.3979	104.539	53.8965	21.6649	7.43743	1.48444	-0.0580368	1.54248	ARHGAP44	chr17:12862364:+	chr17_12959047_+
chr16:85113296-85113443:mpeak_28958|chr16_85061356_85121881_KIAA0513_NM_+|	48.6984	2.76606	0.785032	3.5235	0.00042588	0.0858621	65.4063	73.0994	65.4771	77.5961	74.5236	5.63848	5.53783	19.8415	59.2748	40.5887	1239.28	181.777	-0.0667492	-2.83601	2.76926	KIAA0513	chr16:85113360:+;chr16:85113425:+	chr16_85079773_+;chr16_85079832_+
chr16:30780142-30780302:mpeak_27662|chr16_30772932_30785258_RNF40_NM_+|	99.3746	1.33009	0.496295	2.68005	0.0073612	0.258208	32.7032	22.1513	10.9129	11.855	8.65006	193.964	181.641	174.606	192.913	164.351	14.6043	5.90707	1.38899	0.0831052	1.30588	RNF40	chr16:30780214:+	chr16_30768894_+
chr16:28930770-28930895:mpeak_27467|chr16_28916365_28936532_RABEP2_NM_-|	60.1363	2.03973	0.620269	3.28847	0.00100735	0.13336	29.3201	24.3665	5.95246	5.38862	3.99233	119.536	128.478	117.065	75.4407	91.8237	21.6466	5.39283	2.39284	0.387817	2.00503	RABEP2	chr16:28930803:-	chr16_28919483_-
chr16:27694324-27694381:mpeak_27392|chr16_27561467_27789894_KIAA0556_NM_+|	10.1208	4.25003	1.49728	2.83851	0.00453254	0.216531	7.89387	23.2589	0.992077	0	0.665389	9.02157	24.3665	8.9287	10.7772	15.3039	93.3052	4.73428	4.81727	0.516531	4.30074	KIAA0556	chr16:27694376:+	chr16_27683054_+
chr16:24571035-24571128:mpeak_27323|chr16_24550907_24582196_RBBP6_NM_+|	57.0277	1.50231	0.649208	2.31407	0.020664	0.348782	13.5323	29.9043	3.96831	8.62179	4.65772	119.536	124.047	87.3028	86.2179	92.4891	17.8324	6.48391	1.91746	0.457898	1.45956	RBBP6	chr16:24571111:+	chr16_24559754_+;chr16_24559806_+
chr16:14335231-14335320:mpeak_26920|chr16_14165169_14354765_MKL2_NM_+|	11.6204	4.6851	2.13087	2.19868	0.0279006	0.379552	0	11.0757	0	0	0	14.66	34.3346	36.7069	10.7772	8.65006	22.6059	0	Inf	0.388706	Inf	MKL2	chr16:14335282:+	chr16_14241424_+;chr16_14241471_+
chr15:28564937-28565031:mpeak_23812|chr15_28357181_28567298_HERC2_NM_-|	23.2606	1.43747	0.68904	2.08619	0.0369611	0.414759	21.4262	25.474	4.96039	11.855	9.98084	32.7032	29.9043	28.7702	26.9431	40.5887	74.9116	27.8251	1.39253	-0.0362697	1.4288	HERC2	chr15:28564910:-;chr15:28564937:-;chr15:28564975:-	chr15_28319794_-
chr14:93753908-93754038:mpeak_23209|chr14_93709434_93799438_BTBD7_NM_-|	174.237	2.00709	0.477069	4.20712	2.58644e-05	0.0212295	23.6816	28.7967	12.897	12.9327	7.31928	244.71	235.912	419.649	377.203	379.272	10.9188	2.81849	1.24772	-0.706104	1.95382	BTBD7	chr14:93753974:-	chr14_93287630_-
chr14:91072160-91072216:mpeak_23070|chr14_91007933_91282761_TTC7B_NM_-|	10.5601	2.73177	1.14357	2.3888	0.0169034	0.330813	5.63848	9.9681	0.992077	0	1.99617	16.9154	18.8286	14.8812	15.0881	21.2925	43.662	5.82939	2.96975	0.0647835	2.90496	TTC7B	chr14:91072162:-	chr14_90605819_-
chr14:54878346-54878442:mpeak_21841|chr14_54863672_54886709_CDKN3_NM_+|	132.303	1.18171	0.564428	2.09365	0.0362916	0.41339	18.0431	13.2908	8.9287	14.0104	7.31928	218.773	184.964	241.075	312.54	304.083	7.76098	3.52786	0.635353	-0.502092	1.13745	CDKN3	chr14:54878443:+	chr14_54411670_+;chr14_54411724_+
chr14:50623159-50623214:mpeak_21657|chr14_50585571_50698099_SOS2_NM_-|	12.7085	4.00665	1.9308	2.07512	0.0379756	0.41873	0	12.1832	0	0	0.665389	27.0647	23.2589	14.8812	37.7203	11.3116	24.2098	1.04108	4.77952	0.240085	4.53943	SOS2	chr14:50623153:-	chr14_50156438_-
chr14:102231619-102231813:mpeak_23435|chr14_102228134_102391477_PPP2R5C_NM_+|	115.91	1.59005	0.531064	2.99408	0.0027527	0.17291	23.6816	45.4102	14.8812	14.0104	10.6462	184.942	204.9	190.479	239.255	230.89	17.723	5.98492	1.39025	-0.175977	1.56622	PPP2R5C	chr14:102231676:+;chr14:102231811:+	chr14_101765338_+;chr14_101765474_+
chr13:111296100-111296226:mpeak_20713|chr13_111293955_111358527_CARS2_NM_-|	32.254	2.4005	1.0835	2.21552	0.0267245	0.377416	19.1708	12.1832	0.992077	0	6.65389	48.4909	66.454	77.382	59.2748	31.9387	27.2775	4.5351	2.62084	0.0323386	2.5885	CARS2	chr13:111296100:-;chr13:111296178:-	chr13_110643829_-
chr13:101308627-101308683:mpeak_20655|chr13_101257396_101327189_TMTC4_NM_-|	48.6712	2.12873	1.00672	2.11451	0.0344714	0.404202	2.25539	9.9681	4.96039	3.23317	0	56.3848	71.9918	94.2474	109.928	133.743	9.52159	2.42472	1.16206	-0.81133	1.97339	TMTC4	chr13:101308631:-	chr13_100656379_-
chr13:100146618-100146755:mpeak_20621|chr13_100140070_100151560_LINC01232_NR_-|	3.75037	5.89277	2.48265	2.37358	0.0176168	0.333219	2.25539	8.86053	1.98415	2.15545	3.99233	0	0	0	12.9327	5.32311	#DIV/0!	44.5444	1.03592	-Inf	Inf	LINC01232	chr13:100146618:-;chr13:100146687:-	chr13_99494364_-;chr13_99494429_-
chr12:98929301-98929431:mpeak_17795|chr12_98909350_98941350_TMPO_NM_+|	347.166	2.51942	0.546025	4.6141	3.94796e-06	0.0087316	359.735	409.8	365.084	521.618	497.711	78.9387	37.6573	299.607	408.457	493.053	660.001	115.26	-0.262255	-2.77983	2.51757	TMPO	chr12:98929407:+	chr12_98535573_+;chr12_98535627_+
chr12:98925455-98925624:mpeak_17791|chr12_98909350_98941350_TMPO_NM_+|	185.208	2.83105	0.580874	4.87377	1.09488e-06	0.0087316	133.068	85.2826	107.144	93.762	115.112	78.9387	37.6573	299.607	408.457	493.053	187.271	26.3104	0.0516	-2.77983	2.83143	TMPO	chr12:98925617:+	chr12_98531702_+
chr12:79997930-79998011:mpeak_17447|chr12_79986473_80084790_PAWR_NM_-|	44.4683	3.4908	0.989752	3.52695	0.000420377	0.0858621	16.9154	8.86053	2.97623	1.07772	0	69.9171	91.928	82.3424	103.461	67.2043	15.9263	1.6023	3.25359	-0.0596077	3.31319	PAWR	chr12:79997960:-	-
chr12:6556289-6556339:mpeak_14971|chr12_6548842_6560683_CD27-AS1_NR_-|	19.9448	2.82195	1.25314	2.25191	0.0243283	0.368118	6.76617	6.6454	0	1.07772	1.33078	25.937	52.0556	43.6514	19.399	42.5849	17.196	2.28002	3.06223	0.147279	2.91495	CD27-AS1	chr12:6556285:-	chr12_6447123_-
chr12:56219169-56219226:mpeak_16631|chr12_56215971_56223420_DNAJC14_NM_-|	14.5992	2.54113	1.18611	2.14242	0.03216	0.397781	10.1493	15.5059	4.96039	0	0.665389	27.0647	24.3665	11.9049	33.4094	17.9655	49.8826	8.89031	2.77409	0.285858	2.48823	DNAJC14	chr12:56219169:-	chr12_55825374_-
chr12:53869206-53869438:mpeak_16474|chr12_53845885_53873189_PCBP2_NM_+|	3034.74	0.989776	0.373904	2.64714	0.00811763	0.269755	201.858	326.732	163.693	173.514	175.663	4623.55	5388.31	5841.35	7008.44	6444.29	5.27963	2.65817	0.62852	-0.361486	0.990006	PCBP2	chr12:53869332:+;chr12:53869434:+	chr12_53475546_+;chr12_53475645_+
chr12:48139149-48139205:mpeak_16037|chr12_48131468_48152889_RAPGEF3_NM_-|	4.77262	4.47726	1.9238	2.3273	0.0199492	0.344105	7.89387	7.75296	5.95246	5.38862	8.65006	0	0	7.93662	2.15545	1.99617	#DIV/0!	165.377	0.231472	-Inf	Inf	RAPGEF3	chr12:48139153:-	chr12_47745372_-
chr12:111801858-111801914:mpeak_18291|chr12_111801267_111806925_FAM109A_NM_-|	23.3216	3.22713	1.28777	2.50598	0.0122111	0.302807	7.89387	7.75296	0.992077	1.07772	0	42.8524	62.0237	41.6673	23.7099	45.2465	14.9193	1.87103	3.50327	0.507989	2.99528	FAM109A	chr12:111801860:-	-
chr12:111159610-111159935:mpeak_18283|chr12_111158970_111180783_PPP1CC_NM_-|	233.035	0.888515	0.411316	2.16018	0.030759	0.390216	45.1078	52.0556	62.5009	46.3421	45.9118	301.095	227.051	526.793	469.888	553.604	18.3971	9.98235	-0.0865366	-0.968562	0.882026	PPP1CC	chr12:111159613:-;chr12:111159713:-	chr12_110721812_-;chr12_110721909_-
chr11:66442435-66442731:mpeak_13075|chr11_66433049_66445392_RBM4B_NM_-|	25.0841	1.49615	0.712725	2.09919	0.0357999	0.410399	21.4262	33.227	9.92077	18.3213	14.6386	24.8093	23.2589	38.691	22.6322	43.9157	113.699	40.746	0.934942	-0.545551	1.48049	RBM4B	chr11:66442608:-;chr11:66442672:-;chr11:66442707:-	chr11_66675139_-;chr11_66675202_-
chr11:460825-460884:mpeak_11253|chr11_450279_490419_PTDSS2_NM_+|	46.569	4.30939	1.39237	3.09499	0.00196817	0.16249	2.25539	8.86053	0.992077	0	0	95.8541	71.9918	102.184	79.7516	103.801	6.62269	0.3472	4.07099	-0.182584	4.25358	PTDSS2	chr11:460879:+	chr11_460877_+
chr11:118962323-118962444:mpeak_14459|chr11_118955586_118963819_HMBS_NM_+|	85.1692	1.54689	0.734025	2.10741	0.0350824	0.405496	12.4047	26.5816	6.94454	14.0104	3.99233	128.557	153.952	170.637	201.534	133.078	13.8	4.93762	1.22904	-0.253736	1.48278	HMBS	chr11:118962393:+;chr11:118962440:+	chr11_119091664_+;chr11_119091726_+
chr11:114312571-114312625:mpeak_14257|chr11_114310107_114320567_REXO2_NM_+|	70.5379	2.16935	0.958458	2.26338	0.0236125	0.361951	7.89387	16.6135	0	0	5.32311	145.473	162.812	99.2077	156.27	111.785	7.94958	1.4494	2.78784	0.332413	2.45542	REXO2	chr11:114312622:+	chr11_114441899_+
chr10:90665353-90665432:mpeak_9844|chr10_90639943_90682924_STAMBPL1_NM_+|	5.81501	3.52925	1.72666	2.04397	0.0409563	0.42442	2.25539	4.43027	4.96039	3.23317	1.99617	1.1277	1.10757	8.9287	24.7876	5.32311	299.099	26.1011	-0.0230115	-3.54145	3.51844	STAMBPL1	chr10:90665434:+	chr10_88905671_+
chr10:75575626-75575676:mpeak_9501|chr10_75574263_75634349_CAMK2G_NM_-|	51.6187	2.48831	1.07917	2.30577	0.0211234	0.350047	6.76617	5.53783	1.98415	2.15545	0	73.3002	116.294	74.4058	92.6842	143.059	6.48964	1.33472	2.15653	-0.125079	2.28161	CAMK2G	chr10:75575625:-	chr10_73815868_-
chr10:63961106-63961177:mpeak_9088|chr10_63958202_64028622_RTKN2_NM_-|	27.9866	3.39803	1.1587	2.93263	0.00336109	0.188958	11.277	2.21513	4.96039	2.15545	0	20.2985	22.1513	95.2394	60.3525	61.2158	31.7836	3.28209	1.50797	-1.76762	3.27559	RTKN2	chr10:63961107:-	chr10_62201348_-;chr10_62201373_-
chr10:14891610-14891677:mpeak_8127|chr10_14880158_14913526_HSPA14_NM_+|	49.2666	1.58598	0.769481	2.06111	0.0392926	0.419814	6.76617	13.2908	2.97623	11.855	6.65389	50.7463	57.5934	85.3187	139.026	118.439	18.513	6.26782	0.485731	-1.07678	1.56251	HSPA14	chr10:14891668:+	chr10_14849668_+
chr10:118659646-118659795:mpeak_10769|chr10_118646077_118886097_SHTN1_NM_-|	81.9663	1.5564	0.728459	2.13656	0.032634	0.397781	10.1493	25.474	1.98415	6.46634	6.65389	147.728	190.501	116.073	156.27	158.363	10.5323	3.50689	1.82282	0.236263	1.58655	SHTN1	chr10:118659661:-	chr10_116900106_-;chr10_116900151_-;chr10_116900224_-
chr10:118423796-118423854:mpeak_10752|chr10_118423684_118429481_C10orf82_NM_-|	4.12193	3.73873	1.81484	2.06009	0.03939	0.419814	3.38309	7.75296	0.992077	0	2.66156	2.25539	2.21513	5.95246	14.0104	1.99617	249.099	16.6384	2.1928	-1.71134	3.90413	C10orf82	chr10:118423804:-	chr10_116664293_-
chr10:104284554-104284625:mpeak_10433|chr10_104263718_104389822_SUFU_NM_+|	16.1636	3.01061	1.39657	2.15572	0.0311055	0.392791	4.51078	7.75296	0	0	1.33078	27.0647	43.1951	30.7544	15.0881	31.9387	17.4549	1.71093	3.78902	0.43824	3.35078	SUFU	chr10:104284611:+	chr10_102524869_+
chr1:28907159-28907246:mpeak_1237|chr1_28905192_28908366_SNHG12_NR_-|	21.9122	4.00991	1.33277	3.0087	0.00262367	0.172034	0	8.86053	4.96039	0	3.32695	5.63848	6.6454	56.5484	81.907	51.235	72.1314	4.36887	0.681448	-3.36385	4.04529	SNHG12	chr1:28907158:-;chr1:28907184:-	chr1_28580619_-;chr1_28580642_-
chr1:24298053-24298110:mpeak_948|chr1_24294213_24306953_SRSF10_NR_-mpeak_948|chr1_24297929_24306953_SRSF10_NM_-||	56.187	2.26054	0.62829	3.59792	0.000320775	0.0752264	20.2985	16.6135	2.97623	3.23317	6.65389	89.088	95.2507	118.057	95.9174	113.782	20.024	3.92465	2.10579	-0.245302	2.35109	SRSF10	chr1:24298040:-;chr1:24298082:-	-
chr1:174215427-174215481:mpeak_5701|chr1_174128551_174958985_RABGAP1L_NM_+|	11.8807	2.48784	1.15838	2.14769	0.0317382	0.39651	3.38309	8.86053	2.97623	0	3.99233	11.277	11.0757	26.7861	34.4872	15.9693	54.7749	9.02166	1.39806	-1.20399	2.60205	RABGAP1L	chr1:174215484:+	chr1_174246355_+
chr1:16928886-16928965:mpeak_650|chr1_16890681_16940100_NBPF1_NM_-|	59.2134	2.71248	1.02794	2.63876	0.00832096	0.273056	9.02157	7.75296	1.98415	1.07772	0	138.707	142.876	79.3662	100.228	111.12	5.95723	1.05323	3.03875	0.538918	2.49983	NBPF1	chr1:16928885:-	-
chr1:12567503-12567703:mpeak_517|chr1_12290095_12568946_VPS13D_NM_+|	44.7016	2.0617	0.725759	2.84075	0.00450074	0.216531	5.63848	17.7211	7.93662	7.54407	8.65006	40.597	34.3346	85.3187	131.482	107.793	31.1745	7.43413	0.538102	-1.53003	2.06813	VPS13D	chr1:12567652:+;chr1:12567699:+	chr1_12507597_+;chr1_12507643_+
chr8:68044263-68044322:mpeak_68805|chr8_67976602_68107616_CSPP1_NM_+|	5.29624	4.8274	2.10356	2.29488	0.0217401	0.354053	14.66	8.86053	7.93662	7.54407	4.65772	0	0	1.98415	0	7.31928	#DIV/0!	216.462	0.808936	-Inf	Inf	CSPP1	-	chr8_67132078_+
chr8:37607913-37608089:mpeak_68179|chr8_37594096_37611432_ERLIN2_NM_+|	105.103	1.09873	0.553893	1.98365	0.0472948	0.441685	22.5539	14.3984	15.8732	8.62179	15.3039	169.154	121.832	220.241	246.799	216.251	12.699	5.8246	0.477894	-0.646586	1.12448	ERLIN2	-	chr8_37750447_+
chr7:91706164-91706250:mpeak_65851|chr7_91570188_91739435_AKAP9_NM_+|	7.98533	3.8247	1.47569	2.5918	0.00954739	0.279896	5.63848	7.75296	0	0	1.99617	6.76617	11.0757	6.94454	23.7099	15.9693	75.0564	4.28143	3.33097	-0.80084	4.13181	AKAP9	-	chr7_92076889_+;chr7_92076956_+
chr6:86328976-86329186:mpeak_62120|chr6_86322641_86353043_SYNCRIP_NM_-|	440.301	0.840735	0.393325	2.13751	0.0325567	0.397781	404.843	346.668	562.508	397.68	392.58	295.456	249.202	491.078	608.914	654.077	137.978	77.1217	-0.263085	-1.10232	0.839234	SYNCRIP	-	chr6_85619317_-;chr6_85619363_-
chr6:31857262-31857388:mpeak_60900|chr6_31848041_31865484_EHMT2_NM_-|	81.4172	1.48527	0.504421	2.9445	0.00323474	0.188116	38.3417	26.5816	37.6989	29.0985	25.9502	77.811	54.2708	188.495	156.27	179.655	49.1538	17.6858	0.0703867	-1.40433	1.47472	EHMT2	-	chr6_31889521_-
chr5:95105812-95105881:mpeak_57577|chr5_95066849_95128762_RHOBTB3_NM_+|	233.885	2.43067	0.670457	3.62539	0.000288522	0.0752264	12.4047	8.86053	9.92077	7.54407	6.65389	196.219	129.585	490.086	788.894	688.678	6.52698	1.22576	0.403302	-2.00944	2.41274	RHOBTB3	-	chr5_95770188_+
chr5:95099208-95099334:mpeak_57576|chr5_95066849_95128762_RHOBTB3_NM_+|	238.595	1.38807	0.587321	2.36339	0.0181088	0.336283	15.7877	12.1832	18.8495	23.7099	21.9578	196.219	129.585	490.086	788.894	688.678	8.58521	3.27888	-0.620792	-2.00944	1.38865	RHOBTB3	-	chr5_95763616_+
chr5:34918465-34918578:mpeak_56254|chr5_34915819_34925330_BRIX1_NM_+|	86.5799	3.07651	0.869717	3.53737	0.000404138	0.0858621	22.5539	6.6454	2.97623	1.07772	1.33078	152.239	177.211	169.645	149.804	182.317	8.86306	1.07316	3.02395	-0.0219932	3.04594	BRIX1	-	chr5_34918365_+
chr5:137721680-137721902:mpeak_58588|chr5_137688284_137771308_KDM3B_NM_+|	45.2022	1.24157	0.614243	2.02131	0.0432478	0.432491	66.534	57.5934	56.5484	28.0208	54.5619	31.5755	19.9362	38.691	50.653	47.908	240.97	101.369	0.42034	-0.828894	1.24923	KDM3B	-	chr5_138386060_+
chr4:99300335-99300474:mpeak_54276|chr4_99182526_99363140_RAP1GDS1_NM_+|	81.6483	5.27552	1.36598	3.86208	0.000112427	0.0510218	4.51078	8.86053	0.992077	0	0	99.2372	112.972	207.344	238.177	144.389	6.30101	0.168174	4.33751	-0.890048	5.22756	RAP1GDS1	-	chr4_98379245_+;chr4_98379325_+
chr4:76721762-76721825:mpeak_53842|chr4_76649705_76734358_USO1_NM_+|	22.9738	4.23859	1.37026	3.09327	0.00197966	0.16249	5.63848	7.75296	0	1.07772	0	41.7247	49.8405	43.6514	38.7981	41.2541	14.625	0.871215	4.22021	0.150947	4.06927	USO1	-	chr4_75800654_+;chr4_75800690_+
chr4:76582102-76582164:mpeak_53838|chr4_76570886_76598667_G3BP2_NM_-|	110.077	1.09189	0.546227	1.99897	0.0456111	0.439655	55.2571	39.8724	11.9049	5.38862	13.3078	314.627	255.848	134.923	155.192	114.447	16.6755	7.56407	2.22126	1.08077	1.14049	G3BP2	-	chr4_75656927_-
chr4:47458598-47458749:mpeak_53416|chr4_47453682_47465676_COMMD8_NM_-|	51.0797	2.40905	0.728864	3.30521	0.000949042	0.129829	23.6816	13.2908	5.95246	3.23317	1.99617	107.131	75.3145	102.184	94.8397	83.1736	20.2649	3.99069	2.31026	-0.0340142	2.34427	COMMD8	-	chr4_47456729_-
chr4:110595335-110595401:mpeak_54583|chr4_110481354_110608670_CCDC109B_NM_+|	145.558	1.12296	0.411633	2.72807	0.00637056	0.248414	57.5125	66.454	45.6356	57.1194	37.2618	159.005	188.286	251.988	294.219	298.094	35.6952	16.5838	0.409313	-0.696648	1.10596	CCDC109B	-	chr4_109674234_+
chr3:37370541-37370591:mpeak_48521|chr3_37284681_37407570_GOLGA4_NM_+|	24.7078	5.08422	1.63495	3.10971	0.00187274	0.16249	5.63848	5.53783	0	1.07772	0	25.937	34.3346	23.8099	40.9535	109.789	18.5433	0.617421	3.95935	-0.94915	4.9085	GOLGA4	-	chr3_37329069_+
chr22:41493404-41493527:mpeak_47323|chr22_41488613_41572776_EP300_NM_+|	11.9499	2.02481	0.998102	2.02866	0.0424928	0.430701	9.02157	5.53783	0.992077	4.3109	1.33078	19.1708	16.6135	18.8495	23.7099	19.9617	40.6865	10.6104	1.71902	-0.220052	1.93907	EP300	-	chr22_41097515_+
chr22:20937474-20937538:mpeak_46549|chr22_20861828_20940854_MED15_NM_+|	14.2837	2.84979	1.02462	2.78131	0.00541403	0.237221	6.76617	7.75296	2.97623	0	3.32695	9.02157	18.8286	36.7069	30.1763	27.281	52.133	6.69382	1.78877	-1.17253	2.96129	MED15	-	chr22_20583244_+
chr20:34457355-34457411:mpeak_44328|chr20_34359922_34535406_PHF20_NM_+|	39.629	2.02921	0.810307	2.50425	0.0122712	0.30338	11.277	8.86053	9.92077	3.23317	9.31545	18.0431	44.3027	97.2236	105.617	88.4968	32.2997	7.7125	0.426885	-1.63936	2.06625	PHF20	-	chr20_35869483_+
chr20:13747512-13747574:mpeak_43846|chr20_13695814_13765579_ESF1_NM_-|	16.8807	2.37827	0.924831	2.57158	0.0101237	0.288526	15.7877	28.7967	2.97623	2.15545	9.31545	24.8093	14.3984	21.8257	24.7876	23.954	113.714	20.4728	2.21072	-0.262903	2.47362	ESF1	-	chr20_13766872_-
chr2:231248220-231248284:mpeak_43119|chr2_231191893_231267512_SP140L_NM_+|	7.78376	3.17454	1.4628	2.17019	0.0299926	0.388211	3.38309	11.0757	1.98415	0	0	14.66	14.3984	10.9129	10.7772	10.6462	49.7575	6.136	3.45031	0.430763	3.01955	SP140L	-	chr2_230383535_+
chr2:118693063-118693135:mpeak_40785|chr2_118677972_118771739_CCDC93_NM_-|	24.9284	1.89787	0.896527	2.11691	0.0342674	0.403459	10.1493	15.5059	5.95246	4.3109	1.33078	48.4909	33.227	38.691	60.3525	31.2733	31.3948	8.89688	1.73082	-0.0883369	1.81915	CCDC93	-	chr2_117935521_-
chr18:9221844-9222002:mpeak_33537|chr18_9136750_9280938_ANKRD12_NM_+|	14.6371	4.18926	1.92817	2.17267	0.0298055	0.388211	37.214	23.2589	43.6514	21.5545	11.3116	0	0	0	5.38862	3.99233	#DIV/0!	815.669	0.24546	-Inf	Inf	ANKRD12	-	chr18_9221986_+
chr17:76029322-76029423:mpeak_33043|chr17_76000317_76100565_TNRC6C_NM_+mpeak_33043|chr17_76000317_76100565_TNRC6C_NM_+||	21.1092	3.28238	1.19982	2.73574	0.00622405	0.245479	3.38309	8.86053	1.98415	0	1.33078	13.5323	38.7648	41.6673	46.3421	55.2273	23.4116	2.3143	2.46994	-0.868634	3.33857	TNRC6C	-	chr17_78033294_+
chr17:27011887-27011989:mpeak_30476|chr17_26989301_27028456_SUPT6H_NM_+|	122.844	1.17543	0.597491	1.96727	0.0491522	0.448409	14.66	14.3984	7.93662	14.0104	5.9885	157.877	221.513	288.695	256.498	246.859	7.65923	3.52698	0.641817	-0.476949	1.11877	SUPT6H	-	chr17_28684953_+
chr16:2808888-2809034:mpeak_26481|chr16_2802329_2820858_SRRM2_NM_+|	152.493	1.32437	0.58474	2.26488	0.0235202	0.361951	48.4909	24.3665	15.8732	9.69951	7.31928	336.053	337.808	212.305	266.198	266.821	10.8119	4.41312	1.7323	0.439547	1.29275	SRRM2	-	chr16_2759005_+;chr16_2759042_+
chr15:44116680-44116746:mpeak_24314|chr15_44097474_44116951_MFAP1_NM_-|	13.4948	2.19774	1.09492	2.00722	0.0447266	0.438659	2.25539	8.86053	6.94454	3.23317	2.66156	11.277	6.6454	34.7227	37.7203	20.6271	62.0227	13.7953	0.377027	-1.7916	2.16862	MFAP1	-	chr15_43824495_-
chr14:103478472-103478533:mpeak_23553|chr14_103400180_103523742_CDC42BPB_NM_-|	94.4552	1.55345	0.753652	2.06123	0.0392815	0.419814	25.937	11.0757	3.96831	11.855	4.65772	164.644	180.533	129.962	189.679	222.24	10.7228	3.77961	1.4387	-0.065679	1.50437	CDC42BPB	-	chr14_103012144_-
chr13:77825431-77825499:mpeak_20408|chr13_77619628_77901177_MYCBP2_NM_-|	28.3879	2.08719	0.807895	2.5835	0.00978047	0.283126	13.5323	22.1513	4.96039	3.23317	3.32695	36.0863	64.2388	33.7306	56.0416	46.5772	35.568	8.44925	2.21602	0.142336	2.07369	MYCBP2	-	chr13_77251308_-
chr12:133266844-133266960:mpeak_19174|chr12_133264191_133281204_PXMP2_NM_+|	242.738	1.08108	0.545269	1.98266	0.0474058	0.442013	33.8309	28.7967	35.7148	18.3213	17.9655	354.096	317.872	571.437	626.158	423.187	9.32003	4.4424	0.383732	-0.685263	1.06899	PXMP2	-	chr12_132690311_+
chr11:66109564-66109731:mpeak_13029|chr11_66105360_66112582_BRMS1_NM_-|	140.356	0.94991	0.462567	2.05356	0.0400182	0.419972	36.0863	32.1194	20.8336	14.0104	21.9578	240.199	244.772	254.964	310.384	228.228	14.0639	7.1577	0.848916	-0.125508	0.974424	BRMS1	-	chr11_66342097_-
chr10:99123418-99123468:mpeak_10178|chr10_99116953_99161127_RRP12_NM_-|	16.5613	5.25687	1.44671	3.63368	0.000279411	0.0752264	5.63848	6.6454	0	0	0	30.4478	29.9043	41.6673	28.0208	23.2886	20.3537	0	Inf	-0.0385032	Inf	RRP12	-	chr10_97363656_-
chr10:74291594-74291647:mpeak_9410|chr10_74128113_74385949_MICU1_NM_-|	38.9281	2.92958	1.31428	2.22904	0.0258109	0.371678	1.1277	9.9681	0	3.23317	0	49.6186	80.8523	60.5167	80.8293	103.135	8.50442	1.32246	2.36395	-0.321033	2.68499	MICU1	-	chr10_72531838_-
chr10:118719640-118719788:mpeak_10777|chr10_118646077_118886097_SHTN1_NM_-|	99.9717	0.995229	0.465426	2.13832	0.0324911	0.397781	67.6617	73.0994	37.6989	23.7099	28.6117	147.728	190.501	116.073	156.27	158.363	41.617	20.9007	1.22988	0.236263	0.993621	SHTN1	-	chr10_116960201_-
chr10:105763230-105763295:mpeak_10524|chr10_105726942_105785331_SLK_NM_+|	80.5854	0.993585	0.480992	2.0657	0.0388569	0.419814	51.874	67.5615	66.4692	44.1867	61.2158	63.151	69.7767	100.2	139.026	142.393	89.85	45.0374	0.0598631	-0.936531	0.996394	SLK	-	chr10_104003525_+
chr1:82190210-82190295:mpeak_2748|chr1_82165454_82456074_ADGRL2_NM_+|	6.22892	5.20673	2.1756	2.39324	0.0167004	0.330307	7.89387	6.6454	3.96831	9.69951	9.98084	0	0	1.98415	2.15545	19.9617	#DIV/0!	98.122	-0.116841	-Inf	Inf	ADGRL2	-	chr1_81724580_+
chr1:43876380-43876430:mpeak_1923|chr1_43855555_43916007_SZT2_NM_+|	10.2088	1.92521	0.965891	1.99319	0.0462403	0.441196	6.76617	13.2908	3.96831	3.23317	5.32311	10.1493	9.9681	20.8336	17.2436	11.3116	99.6998	25.3592	1.2643	-0.710781	1.97508	SZT2	-	chr1_43410804_+
chr1:39750002-39750062:mpeak_1712|chr1_39549838_39951209_MACF1_NM_+|	55.8048	2.44744	1.06986	2.28763	0.0221592	0.356207	9.02157	4.43027	1.98415	0	0.665389	143.217	119.617	79.3662	87.2956	112.451	5.11798	0.949274	2.92895	0.49827	2.43068	MACF1	-	chr1_39284379_+
chr1:226175591-226175874:mpeak_7120|chr1_226173224_226187066_SDE2_NM_-|	18.3193	2.1339	0.927694	2.30022	0.0214359	0.350489	41.7247	26.5816	29.7623	23.7099	27.281	3.38309	2.21513	7.93662	8.62179	11.977	1220.14	282.993	0.343462	-1.76475	2.10821	SDE2	-	chr1_225987977_-;chr1_225988083_-
chr1:214830269-214830403:mpeak_6826|chr1_214776531_214836933_CENPF_NM_+|	26.7032	2.43048	0.972919	2.49813	0.0124852	0.30409	13.5323	5.53783	1.98415	0	3.99233	45.1078	38.7648	46.6276	40.9535	70.5312	22.7371	3.7799	2.25891	-0.329716	2.58863	CENPF	-	chr1_214657061_+
chr1:16775645-16775699:mpeak_635|chr1_16767166_16785336_NECAP2_NM_+|	34.8341	2.1588	1.03207	2.09172	0.0364638	0.41339	6.76617	6.6454	2.97623	0	2.66156	37.214	73.0994	48.6118	67.8966	102.47	12.1577	2.57459	1.83524	-0.404218	2.23946	NECAP2	-	chr1_16449200_+
chr8:68097790-68097856:mpeak_68813|chr8_67976602_68107616_CSPP1_NM_+|	4.69639	4.95362	2.31316	2.14149	0.0322342	0.397781	12.4047	8.86053	10.9129	2.15545	3.32695	0	0	1.98415	0	7.31928	#DIV/0!	176.228	0.960178	-Inf	Inf	CSPP1	-	-
chr4:41674174-41674224:mpeak_53359|chr4_41361623_41699176_LIMCH1_NM_+|	3.51257	4.87962	2.03137	2.40213	0.0163	0.327504	4.51078	4.43027	5.95246	1.07772	3.99233	0	0	7.93662	3.23317	3.99233	#DIV/0!	72.6977	0.283024	-Inf	Inf	LIMCH1	-	-
chr8:67998236-67998302:mpeak_68803|chr8_67976602_68107616_CSPP1_NM_+|	5.54446	4.66054	2.13166	2.18635	0.0287903	0.384245	14.66	8.86053	8.9287	9.69951	3.99233	0	0	1.98415	0	7.31928	#DIV/0!	243.142	0.641252	-Inf	Inf	CSPP1	-	-
chr8:68097523-68097589:mpeak_68812|chr8_67976602_68107616_CSPP1_NM_+|	28.5041	4.46236	2.00604	2.22446	0.0261178	0.371765	94.7264	36.5497	86.3107	21.5545	36.5964	0	0	1.98415	0	7.31928	#DIV/0!	1552.78	0.446881	-Inf	Inf	CSPP1	-	-
chr10:70153840-70153907:mpeak_9196|chr10_70101045_70167051_RUFY2_NR_-mpeak_9196|chr10_70105668_70167051_RUFY2_NM_-||	38.7073	1.38699	0.540049	2.56827	0.0102209	0.290287	59.7679	71.9918	52.5801	40.9535	44.5811	16.9154	14.3984	32.7386	25.8654	27.281	420.772	160.814	0.517005	-0.870643	1.38765	RUFY2	-	-
chr1:190443657-190443791:mpeak_6118|chr1_190068264_190446759_BRINP3_NM_-|	8.49795	2.68426	1.2031	2.23112	0.0256735	0.371	7.89387	9.9681	5.95246	11.855	6.65389	3.38309	1.10757	10.9129	8.62179	18.6309	397.759	64.0927	0.131351	-2.50231	2.63366	BRINP3	-	-
chr8:59022811-59022935:mpeak_68605|chr8_58907112_59058465_FAM110B_NM_+|	4.39873	4.00662	1.47993	2.7073	0.00678326	0.255399	9.02157	8.86053	1.98415	1.07772	0	3.38309	3.3227	4.96039	5.38862	5.9885	266.667	18.7414	3.13099	-0.699747	3.83074	FAM110B	-	-
chr14:74482523-74482586:mpeak_22638|chr14_74433717_74486026_ENTPD5_NM_-|	7.11728	2.94315	1.35539	2.17144	0.029898	0.388211	16.9154	7.75296	2.97623	0	5.32311	3.38309	6.6454	9.92077	12.9327	5.32311	245.983	29.4548	2.15656	-0.90543	3.06199	ENTPD5	-	-
chr5:78936664-78936729:mpeak_57321|chr5_78908242_78981021_PAPD4_NM_+|	11.0446	3.82003	1.27359	2.99942	0.00270492	0.17291	5.63848	23.2589	3.96831	0	4.65772	9.02157	4.43027	14.8812	22.6322	21.9578	214.821	14.5046	2.32913	-1.55943	3.88856	PAPD4	-	-
chr8:97273726-97273776:mpeak_69396|chr8_97251913_97273841_MTERF3_NM_-|	4.90453	5.57849	1.63257	3.417	0.000633163	0.0980566	7.89387	11.0757	0	0	0	6.76617	6.6454	5.95246	5.38862	5.32311	141.442	0	Inf	0.271689	Inf	MTERF3	-	-
chr4:95921602-95921682:mpeak_54250|chr4_95679127_96075698_BMPR1B_NM_+|	90.5241	1.16685	0.378949	3.07918	0.00207571	0.167033	104.876	86.3902	70.4375	74.3629	64.5427	76.6833	69.7767	107.144	123.938	127.089	130.593	58.4477	0.454672	-0.705183	1.15986	BMPR1B	-	-
chr12:64891485-64891542:mpeak_17021|chr12_64845839_64895109_TBK1_NM_+|	16.3738	2.36144	0.87998	2.68351	0.00728535	0.258208	16.9154	15.5059	3.96831	4.3109	8.65006	15.7877	14.3984	15.8732	37.7203	30.6079	107.405	20.1057	1.52239	-0.894998	2.41739	TBK1	-	-
chr1:174188355-174188445:mpeak_5700|chr1_174128551_174958985_RABGAP1L_NM_+|	14.3893	1.99047	0.94258	2.11173	0.0347098	0.405496	9.02157	14.3984	8.9287	8.62179	3.32695	11.277	11.0757	26.7861	34.4872	15.9693	104.775	27.0284	0.750755	-1.20399	1.95474	RABGAP1L	-	-
chr16:11984936-11985011:mpeak_26880|chr16_11967028_12010519_GSPT1_NM_-|	827.299	0.6519	0.299509	2.17656	0.0295136	0.388211	766.833	630.205	571.437	475.276	638.774	876.22	914.85	1117.08	1107.9	1174.41	78.0002	49.582	0.314169	-0.339493	0.653662	GSPT1	-	-
chr9:5361751-5361899:mpeak_70763|chr9_5358360_5437937_PLGRKT_NM_-|	17.5173	1.8981	0.76886	2.46872	0.0135595	0.308901	15.7877	11.0757	7.93662	7.54407	4.65772	15.7877	18.8286	29.7623	25.8654	37.9272	77.6032	21.5258	1.00065	-0.849396	1.85005	PLGRKT	-	-
chr4:107157537-107157589:mpeak_54520|chr4_106967837_107237861_TBCK_NM_-|	22.7794	2.08648	0.779148	2.6779	0.00740844	0.258759	19.1708	21.0438	3.96831	10.7772	5.32311	18.0431	36.5497	42.6593	32.3317	37.9272	73.6628	17.7727	1.58774	-0.463533	2.05127	TBCK	-	-
chr7:89983795-89983874:mpeak_65826|chr7_89975978_90014205_GTPBP10_NM_+|	17.0149	1.84919	0.893959	2.06854	0.0385891	0.419399	7.89387	9.9681	6.94454	3.23317	4.65772	10.1493	24.3665	29.7623	31.254	41.9195	51.7502	14.4123	0.852806	-0.991457	1.84426	GTPBP10	-	-
chr11:106698099-106698250:mpeak_14056|chr11_106558482_106889171_GUCY1A2_NM_-|	42.7952	3.30622	0.861722	3.83676	0.000124667	0.0511635	7.89387	8.86053	1.98415	8.62179	7.98467	14.66	17.7211	77.382	135.793	147.051	51.7413	5.16082	0.434928	-2.89072	3.32564	GUCY1A2	-	-
chr9:37836258-37836373:mpeak_71320|chr9_37800550_37861136_DCAF10_NM_+|	90.6227	0.930813	0.382907	2.43091	0.0150609	0.319907	50.7463	57.5934	33.7306	35.5649	40.5887	110.514	122.94	149.804	153.037	151.709	46.4073	24.1743	0.564541	-0.376335	0.940876	DCAF10	-	-
chr20:8467779-8467866:mpeak_43764|chr20_8112911_8862268_PLCB1_NM_+|	11.1936	3.14176	1.46999	2.13727	0.0325758	0.397781	2.25539	11.0757	0	3.23317	0	21.4262	12.1832	25.794	14.0104	21.9578	39.6646	5.23487	2.62873	-0.292896	2.92163	PLCB1	-	-
chr12:98909800-98909934:mpeak_17790|chr12_98909350_98941350_TMPO_NM_+|	148.473	1.77042	0.619819	2.85635	0.00428539	0.216531	20.2985	21.0438	43.6514	47.4198	34.6002	78.9387	37.6573	299.607	408.457	493.053	35.4577	10.4629	-1.019	-2.77983	1.76082	TMPO	-	-
chr10:63969231-63969282:mpeak_9089|chr10_63958202_64028622_RTKN2_NM_-|	28.5469	2.69443	0.835056	3.22665	0.00125249	0.145572	6.76617	7.75296	2.97623	5.38862	3.32695	20.2985	22.1513	95.2394	60.3525	61.2158	34.203	5.3927	0.897422	-1.76762	2.66504	RTKN2	-	-
chr12:46287248-46287330:mpeak_15950|chr12_46123619_46298716_ARID2_NM_+|	24.4355	1.69233	0.804785	2.10284	0.0354798	0.407298	18.0431	7.75296	4.96039	3.23317	4.65772	42.8524	35.4421	30.7544	47.4198	49.2388	32.9475	10.0863	1.5902	-0.117567	1.70777	ARID2	-	-
chr16:74734341-74734541:mpeak_28672|chr16_74706436_74734789_MLKL_NM_-|	22.1712	2.12412	0.996725	2.1311	0.0330809	0.399477	11.277	5.53783	4.96039	0	4.65772	28.1924	25.474	36.7069	68.9743	35.931	31.332	6.79187	1.39087	-0.814892	2.20576	MLKL	-	-
chr3:28381882-28382015:mpeak_48331|chr3_28365945_28390618_AZI2_NM_-|	77.3379	1.2927	0.539039	2.39816	0.0164779	0.327504	36.0863	34.3346	13.8891	16.1659	19.2963	91.3433	147.306	161.709	131.482	121.766	29.508	11.8931	1.09788	-0.213105	1.31098	AZI2	-	-
chr12:124427279-124427327:mpeak_19017|chr12_124422377_124457532_CCDC92_NM_-|	55.3757	1.57553	0.579132	2.7205	0.00651841	0.250015	22.5539	25.474	14.8812	9.69951	5.32311	83.4495	87.4977	105.16	95.9174	103.801	28.0952	9.80843	1.26851	-0.24972	1.51823	CCDC92	-	-
chr5:77411945-77411995:mpeak_57260|chr5_77298879_77590579_AP3B1_NM_-|	24.047	4.30035	1.23686	3.47683	0.000507385	0.092547	10.1493	15.5059	0.992077	0	0.665389	40.597	50.9481	30.7544	40.9535	49.9042	28.0246	1.36291	4.53716	0.17523	4.36193	AP3B1	-	-
chr8:104078541-104078602:mpeak_69680|chr8_104033247_104080879_ATP6V1C1_NM_+|	120.356	1.15004	0.576056	1.99641	0.0458895	0.440449	57.5125	42.0875	43.6514	17.2436	19.9617	195.091	171.673	209.328	218.778	228.228	27.1564	12.3194	0.885742	-0.254617	1.14036	ATP6V1C1	-	-
chr18:44400892-44400945:mpeak_34160|chr18_44392575_44497495_PIAS2_NM_-|	18.6111	3.49079	1.1428	3.05461	0.00225353	0.168315	9.02157	6.6454	0	0	1.99617	32.7032	26.5816	40.6752	39.8758	28.6117	26.4266	1.82862	3.55738	-0.295784	3.85317	PIAS2	-	-
chr5:131915705-131915762:mpeak_58305|chr5_131892615_131977869_RAD50_NM_+|	22.1011	1.96866	0.951544	2.06892	0.038554	0.419399	13.5323	6.6454	3.96831	1.07772	2.66156	39.4693	37.6573	30.7544	28.0208	57.2235	26.1618	6.64455	1.97338	-0.00384542	1.97722	RAD50	-	-
chr16:53967890-53968021:mpeak_27967|chr16_53737874_54145673_FTO_NM_+|	26.3977	1.69291	0.816971	2.07217	0.0382492	0.419158	7.89387	9.9681	2.97623	3.23317	5.9885	36.0863	34.3346	71.4296	52.8085	39.258	25.3646	7.46068	1.13522	-0.630219	1.76544	FTO	-	-
chr1:114380376-114380438:mpeak_3715|chr1_114355233_114442493_AP4B1-AS1_NR_+|	16.8657	5.37401	1.57086	3.42107	0.000623755	0.0980566	7.89387	5.53783	0	0	0	30.4478	31.0119	54.5643	17.2436	21.9578	21.8545	0	Inf	-0.0244581	Inf	AP4B1-AS1	-	-
chr12:48081656-48081764:mpeak_16032|chr12_48057373_48099844_RPAP3_NM_-|	19.8796	2.7919	1.13796	2.45344	0.0141498	0.312431	4.51078	9.9681	2.97623	0	0.665389	39.4693	27.6892	28.7702	52.8085	31.9387	21.5593	3.20799	2.57626	-0.172309	2.74857	RPAP3	-	-
chr10:105778534-105778661:mpeak_10526|chr10_105726942_105785331_SLK_NM_+|	57.2878	1.42423	0.604437	2.35629	0.0184583	0.338816	16.9154	11.0757	10.9129	10.7772	8.65006	63.151	69.7767	100.2	139.026	142.393	21.0574	7.95037	0.468702	-0.936531	1.40523	SLK	-	-
chr6:167413540-167413590:mpeak_63771|chr6_167412804_167453391_FGFR1OP_NM_+|	33.6736	3.0272	0.91366	3.31327	0.000922126	0.128285	12.4047	15.5059	3.96831	0	0.665389	56.3848	76.4221	51.588	67.8966	51.9004	21.0159	2.70368	3.17554	0.217052	2.95849	FGFR1OP	-	-
chr20:10512108-10512158:mpeak_43809|chr20_10415950_10603306_SLX4IP_NM_+|	14.181	3.94207	1.76359	2.23526	0.0254006	0.370205	0	12.1832	0	1.07772	0	31.5755	26.5816	19.8415	31.254	19.2963	20.9488	1.53104	4.0838	0.309509	3.77429	SLX4IP	-	-
chr2:219411637-219411688:mpeak_42870|chr2_219319740_219433084_USP37_NM_-|	28.762	3.43289	1.10449	3.10812	0.00188279	0.16249	11.277	5.53783	0	3.23317	0	50.7463	47.6254	45.6356	60.3525	63.212	17.0931	1.91086	2.96367	-0.197453	3.16112	USP37	-	-
chr1:236721775-236721832:mpeak_7476|chr1_236714290_236767841_HEATR1_NM_-|	35.9146	1.5825	0.783154	2.02068	0.0433134	0.432502	6.76617	12.1832	0.992077	3.23317	6.65389	62.0233	53.1632	64.485	71.1298	78.5159	16.4511	5.08061	1.38555	-0.309558	1.69511	HEATR1	-	-
chr4:125599824-125599875:mpeak_54852|chr4_125588669_125633887_ANKRD50_NM_-|	41.0302	2.42927	0.852329	2.85016	0.00436978	0.216531	3.38309	12.1832	1.98415	5.38862	1.99617	40.597	54.2708	93.2553	89.4511	107.793	16.4084	3.22512	1.31743	-1.02958	2.34701	ANKRD50	-	-
chr17:65239900-65239964:mpeak_32606|chr17_65074702_65241319_HELZ_NM_-|	87.7433	1.22401	0.573623	2.13382	0.0328576	0.397781	15.7877	17.7211	19.8415	8.62179	11.977	101.493	109.649	183.534	174.591	234.217	15.8703	6.82719	0.313707	-0.903258	1.21697	HELZ	-	-
chr1:214776621-214776673:mpeak_6804|chr1_214776531_214836933_CENPF_NM_+|	25.8048	2.45771	1.03924	2.3649	0.0180348	0.335796	7.89387	4.43027	0	1.07772	2.66156	45.1078	38.7648	46.6276	40.9535	70.5312	14.6939	2.36495	2.30562	-0.329716	2.63533	CENPF	-	-
chr1:230203107-230203165:mpeak_7267|chr1_230202941_230227335_GALNT2_NR_+mpeak_7267|chr1_230193535_230415048_GALNT2_NM_+||	47.4527	1.90261	0.723183	2.63088	0.00851638	0.273056	13.5323	11.0757	5.95246	2.15545	1.33078	94.7264	93.0356	89.287	77.5961	85.8352	13.106	3.73487	1.96743	0.156338	1.81109	GALNT2	-	-
chr3:112267372-112267476:mpeak_50001|chr3_112253184_112280810_ATG3_NM_-|	28.8133	2.58082	1.25149	2.06221	0.0391881	0.419814	2.25539	11.0757	3.96831	0	0	59.7679	43.1951	51.588	74.3629	41.9195	12.9474	2.36391	2.33316	-0.120261	2.45342	ATG3	-	-
chr10:74292605-74292793:mpeak_9412|chr10_74128113_74385949_MICU1_NM_-|	39.3663	3.62868	1.15365	3.14538	0.00165868	0.162271	5.63848	11.0757	0	0	1.99617	49.6186	80.8523	60.5167	80.8293	103.135	12.8106	0.816491	3.65073	-0.321033	3.97176	MICU1	-	-
chr7:1195091-1195224:mpeak_63930|chr7_1192860_1199855_ZFAND2A_NM_-|	123.925	1.13895	0.544498	2.09175	0.036461	0.41339	24.8093	28.7967	8.9287	19.399	12.6424	221.028	208.222	254.964	274.82	185.644	12.4883	5.72667	0.972786	-0.152021	1.12481	ZFAND2A	-	-
chr20:44696891-44696946:mpeak_44690|chr20_44691528_44718580_NCOA5_NM_-|	26.1716	2.09872	0.993349	2.11278	0.03462	0.405365	5.63848	5.53783	0.992077	2.15545	1.33078	56.3848	35.4421	44.6435	60.3525	49.2388	12.1711	2.90356	1.90438	-0.163177	2.06756	NCOA5	-	-
chr6:41037810-41037865:mpeak_61284|chr6_41035176_41040188_OARD1_NM_-|	88.8367	1.92304	0.862612	2.22932	0.0257924	0.371678	27.0647	13.2908	8.9287	3.23317	1.33078	180.431	198.254	100.2	157.348	198.286	10.6567	2.95999	2.16555	0.317457	1.8481	OARD1	-	-
chr3:196120416-196120471:mpeak_52262|chr3_196083717_196159345_UBXN7_NM_-|	64.4611	2.2017	0.842281	2.61397	0.00894957	0.27572	5.63848	13.2908	1.98415	7.54407	1.33078	85.7049	94.1431	112.105	155.192	167.678	10.5252	2.49647	1.38669	-0.689192	2.07588	UBXN7	-	-
chr12:69115880-69115926:mpeak_17149|chr12_69080730_69136134_NUP107_NM_+|	39.4926	2.34584	1.09319	2.14587	0.0318835	0.396515	5.63848	5.53783	4.96039	1.07772	0	43.9801	64.2388	54.5643	99.1506	115.778	10.3275	2.24055	1.47324	-0.731329	2.20457	NUP107	-	-
chr1:21097420-21097508:mpeak_791|chr1_21071584_21113181_HP1BP3_NM_-|	200.867	0.967061	0.4914	1.96797	0.0490713	0.448409	41.7247	38.7648	18.8495	22.6322	14.6386	338.309	461.855	289.687	392.291	389.918	10.0591	5.2356	1.10524	0.163165	0.942078	HP1BP3	-	-
chr9:111640379-111640433:mpeak_72375|chr9_111631462_111696608_IKBKAP_NM_-|	52.9849	1.80135	0.771488	2.3349	0.0195485	0.342851	11.277	5.53783	3.96831	0	4.65772	83.4495	87.4977	98.2157	117.472	117.774	9.83625	2.58682	1.54792	-0.379006	1.92693	IKBKAP	-	-
chr14:31602705-31602865:mpeak_21266|chr14_31570273_31676729_HECTD1_NM_-|	86.3169	1.51406	0.698661	2.16709	0.030228	0.388783	13.5323	13.2908	8.9287	5.38862	4.65772	117.28	157.274	125.002	192.913	224.902	9.76969	3.49567	1.08434	-0.398406	1.48274	HECTD1	-	-
chr19:56110095-56110148:mpeak_37562|chr19_56105012_56110893_FIZ1_NM_-|	40.0226	3.74599	1.2667	2.95728	0.00310365	0.185947	3.38309	9.9681	0.992077	1.07772	0	65.4063	73.0994	103.176	81.907	61.2158	9.63945	0.840362	3.27437	-0.245502	3.51987	FIZ1	-	-
chr5:52397919-52397971:mpeak_56563|chr5_52394497_52405602_MOCS2_NM_-|	82.8782	1.23138	0.600231	2.05152	0.0402167	0.419972	18.0431	13.2908	4.96039	4.3109	6.65389	166.899	183.856	132.938	131.482	166.347	8.93328	3.69693	1.56138	0.288515	1.27286	MOCS2	-	-
chr19:5119141-5119191:mpeak_34916|chr19_4969123_5151345_KDM4B_NM_+|	38.8145	3.84907	1.35594	2.83868	0.0045301	0.216531	9.02157	9.9681	0	1.07772	0	89.088	124.047	62.5009	39.8758	52.5657	8.90967	0.695564	4.72412	1.045	3.67912	KDM4B	-	-
chr14:39628681-39628756:mpeak_21505|chr14_39619585_39639634_TRAPPC6B_NM_-|	88.7305	2.02365	0.934177	2.16624	0.030293	0.388783	5.63848	6.6454	3.96831	2.15545	8.65006	102.62	36.5497	277.782	209.078	234.217	8.82653	2.04885	0.318686	-1.78834	2.10703	TRAPPC6B	-	-
chr15:48454937-48454990:mpeak_24428|chr15_48446090_48470558_MYEF2_NR_-mpeak_24428|chr15_48435268_48470558_MYEF2_NM_-||	49.0639	2.89714	0.981791	2.95087	0.00316879	0.188116	9.02157	5.53783	3.96831	0	0	90.2157	77.5296	88.2949	105.617	110.455	8.67947	1.30379	2.46032	-0.274574	2.73489	MYEF2	-	-
chr19:11349971-11350025:mpeak_35305|chr19_11310215_11373168_DOCK6_NM_-|	81.4367	2.0296	0.924565	2.19519	0.0281497	0.381275	4.51078	15.5059	1.98415	6.46634	2.66156	74.4279	171.673	202.384	158.425	176.328	8.13355	2.06875	1.43404	-0.54108	1.97512	DOCK6	-	-
chr8:63936628-63936692:mpeak_68712|chr8_63928012_63951610_GGH_NM_-|	149.033	2.23018	0.749738	2.97461	0.00293358	0.178361	32.7032	8.86053	4.96039	3.23317	5.9885	255.987	285.752	248.019	311.462	333.36	7.67227	1.58842	2.13622	-0.135844	2.27206	GGH	-	-
chr16:11981470-11981611:mpeak_26879|chr16_11967028_12010519_GSPT1_NM_-|	547.579	0.792505	0.374349	2.11702	0.034258	0.403459	69.9171	66.454	63.493	35.5649	49.9042	876.22	914.85	1117.08	1107.9	1174.41	7.61395	4.38202	0.457556	-0.339493	0.797049	GSPT1	-	-
chr3:3195125-3195175:mpeak_47691|chr3_3192729_3221401_CRBN_NM_-|	78.423	1.95836	0.915179	2.13986	0.0323657	0.397781	22.5539	4.43027	3.96831	0	3.32695	188.325	167.243	128.97	125.016	140.397	7.58904	1.84979	2.47205	0.435489	2.03656	CRBN	-	-
chr18:55368260-55368308:mpeak_34348|chr18_55315944_55470327_ATP8B1_NM_-|	40.9553	3.05929	1.20485	2.53916	0.011112	0.292288	7.89387	6.6454	0	0	1.33078	108.259	89.7129	60.5167	64.6634	70.5312	7.34412	0.67997	4.03458	0.601529	3.43305	ATP8B1	-	-
chrY:173700-173750:mpeak_75974|chrY_171864_180887_GTPBP6_NM_-|	52.0996	2.51558	0.971507	2.58936	0.00961551	0.280869	7.89387	7.75296	2.97623	1.07772	0	122.919	95.2507	77.382	109.928	95.816	7.17187	1.43186	2.53343	0.208968	2.32446	GTPBP6	-	-
chr14:67720967-67721018:mpeak_22307|chr14_67708011_67799496_MPP5_NM_+|	87.3421	3.19554	1.02363	3.12178	0.00179762	0.16249	19.1708	7.75296	3.96831	0	0	178.176	201.577	115.081	193.99	153.705	7.08982	0.857501	3.34725	0.299709	3.04754	MPP5	-	-
chr17:78262428-78262505:mpeak_33155|chr17_78234659_78367144_RNF213_NM_+|	54.5182	1.70626	0.850294	2.00667	0.0447851	0.438659	10.1493	3.3227	0.992077	5.38862	1.33078	87.9603	104.111	103.176	119.627	109.124	7.01403	2.32324	1.38984	-0.204261	1.5941	RNF213	-	-
chr1:60301037-60301090:mpeak_2402|chr1_60280532_60338466_HOOK1_NM_+|	70.9885	1.6106	0.81333	1.98026	0.0476745	0.442809	14.66	4.43027	2.97623	0	4.65772	151.111	138.446	123.018	145.493	125.093	6.59294	1.9395	1.9073	0.142067	1.76523	HOOK1	-	-
chr4:71585569-71585675:mpeak_53720|chr4_71570653_71672232_RUFY3_NM_+|	34.9191	4.44913	1.39429	3.19097	0.00141795	0.153138	2.25539	8.86053	0	0	0	83.4495	88.6053	47.6197	62.508	55.8927	6.46069	0	Inf	0.63647	Inf	RUFY3	-	-
chr1:10197219-10197269:mpeak_385|chr1_10093040_10239952_UBE4B_NM_+|	52.726	4.24518	1.59232	2.66604	0.00767495	0.263702	14.66	0	0	0	0.665389	118.408	109.649	83.3345	98.0729	102.47	6.42823	0.234393	5.04651	0.26909	4.77742	UBE4B	-	-
chr1:71544128-71544183:mpeak_2634|chr1_71530820_71546972_ZRANB2_NM_-|	52.1131	3.50928	1.2882	2.72417	0.00644641	0.248414	2.25539	8.86053	1.98415	0	0	93.5987	87.4977	143.851	95.9174	87.166	6.13812	0.606897	3.07099	-0.267281	3.33827	ZRANB2	-	-
chr11:107992356-107992410:mpeak_14095|chr11_107992257_108017996_ACAT1_NM_+|	44.8621	4.64261	1.63937	2.83194	0.00462658	0.218247	2.25539	11.0757	0	0	0	124.047	103.004	33.7306	47.4198	127.089	5.87141	0	Inf	0.709728	Inf	ACAT1	-	-
chr14:89034373-89034423:mpeak_23001|chr14_89029252_89078088_ZC3H14_NM_+|	42.9791	4.6528	1.53887	3.02352	0.00249852	0.168315	0	11.0757	0	0	0	113.897	84.175	72.4217	74.3629	73.8582	5.59173	0	Inf	0.429277	Inf	ZC3H14	-	-
chr4:113101841-113101894:mpeak_54627|chr4_113066552_113107848_C4orf32_NM_+|	70.5038	4.69017	1.36223	3.44302	0.000575263	0.0963625	7.89387	5.53783	0.992077	0	0	116.153	126.263	118.057	195.068	135.074	5.54078	0.221347	4.34401	-0.301697	4.64571	C4orf32	-	-
chr6:160100806-160100859:mpeak_63664|chr6_160100330_160114353_SOD2_NM_-|	48.1629	2.33589	1.16391	2.00695	0.0447554	0.438659	2.25539	9.9681	1.98415	1.07772	0	87.9603	134.016	61.5088	88.3734	94.4853	5.50668	1.25298	2.58213	0.446313	2.13582	SOD2	-	-
chr17:57078925-57079082:mpeak_32018|chr17_57060282_57184266_TRIM37_NM_-|	52.8191	2.43413	1.04473	2.32991	0.0198109	0.344105	6.76617	6.6454	2.97623	0	0	127.43	120.725	79.3662	85.1402	99.143	5.40453	1.12886	2.75688	0.49758	2.2593	TRIM37	-	-
chr1:171462577-171462628:mpeak_5586|chr1_171454665_171560725_PRRC2C_NM_+|	62.549	2.3467	1.01933	2.30221	0.0213236	0.350047	5.63848	8.86053	2.97623	1.07772	0	112.77	157.274	83.3345	113.161	140.397	5.36913	1.20334	2.42351	0.265868	2.15765	PRRC2C	-	-
chr6:108224045-108224107:mpeak_62488|chr6_108193051_108279482_SEC63_NM_-|	284.03	1.29645	0.619665	2.09218	0.0364227	0.41339	34.9586	24.3665	19.8415	5.38862	8.65006	505.208	643.496	475.205	504.375	618.812	5.16452	2.11964	1.39316	0.108348	1.28481	SEC63	-	-
chr17:46926604-46926655:mpeak_31622|chr17_46908349_46940199_CALCOCO2_NM_+|	88.127	4.70449	1.30738	3.5984	0.000320183	0.0752264	10.1493	8.86053	0.992077	0	0	174.793	197.147	134.923	176.747	177.659	5.11099	0.202743	4.84511	0.189229	4.65588	CALCOCO2	-	-
chr9:131453068-131453143:mpeak_73127|chr9_131445933_131456919_SET_NM_+|	4777.06	1.69426	0.697925	2.42757	0.0152003	0.319907	9.02157	6.6454	2.97623	3.23317	2.66156	8259.24	8746.45	10827.5	11126.4	8786.46	0.0921277	0.0288576	1.40553	-0.269156	1.67468	SET	chr9:131453145:+	-
chr8:102662965-102663015:mpeak_69604|chr8_102504667_102678816_GRHL2_NM_+|	100.389	4.47074	1.37148	3.25979	0.00111497	0.142556	2.25539	11.0757	0.992077	0	0	205.241	177.211	190.479	172.436	244.198	3.48569	0.163409	4.33316	-0.0817255	4.41488	GRHL2	chr8:102663019:+	-
chr6:86332194-86332254:mpeak_62121|chr6_86322641_86353043_SYNCRIP_NM_-|	232.833	2.40665	0.873255	2.75596	0.00585207	0.244389	15.7877	2.21513	5.95246	4.3109	1.33078	295.456	249.202	491.078	608.914	654.077	3.30535	0.660985	1.21979	-1.10232	2.32211	SYNCRIP	chr6:86332196:-	-
chr6:32815407-32815556:mpeak_60942|chr6_32813562_32821748_TAP1_NM_-|	76.4201	3.926	1.38722	2.83011	0.00465317	0.218247	1.1277	9.9681	0	1.07772	0	142.09	183.856	132.938	140.104	153.039	3.40418	0.252938	3.94892	0.198463	3.75045	TAP1	chr6:32815499:-	chr6_32847723_-
chr6:108275796-108275846:mpeak_62491|chr6_108193051_108279482_SEC63_NM_-|	276.13	3.28027	1.21704	2.69529	0.00703271	0.258208	2.25539	9.9681	1.98415	0	0	505.208	643.496	475.205	504.375	618.812	1.06411	0.124134	3.20802	0.108348	3.09967	SEC63	chr6:108275794:-	chr6_107954592_-
chr5:177032168-177032226:mpeak_59657|chr5_177027118_177036540_B4GALT7_NM_+|	200.227	2.72537	1.20295	2.26557	0.0234774	0.361951	1.1277	17.7211	2.97623	1.07772	0	447.695	421.983	343.259	462.344	304.083	2.16733	0.365325	2.80203	0.233365	2.56866	B4GALT7	chr5:177032224:+	chr5_177605223_+
chr5:167812790-167812840:mpeak_59330|chr5_167719064_167895955_WWC1_NM_+|	104.597	1.8865	0.895823	2.10588	0.0352147	0.405958	6.76617	5.53783	2.97623	2.15545	0	246.965	193.824	212.305	177.824	197.621	2.79136	0.873107	1.84659	0.169851	1.67674	WWC1	chr5:167812840:+	chr5_168385833_+
chr5:1578050-1578101:mpeak_55876|chr5_1572401_1594646_SDHAP3_NR_-|	117.216	2.30044	0.976471	2.35587	0.0184793	0.338816	7.89387	5.53783	3.96831	0	0	239.071	262.493	263.893	212.312	176.994	2.67796	0.60752	2.34401	0.203879	2.14013	SDHAP3	chr5:1578049:-	chr5_1577935_-
chr5:140905636-140905756:mpeak_58861|chr5_140896575_140998622_DIAPH1_NM_-|	212.185	2.07451	0.59101	3.51011	0.000447929	0.0875381	15.7877	21.0438	3.96831	2.15545	6.65389	442.057	364.389	439.49	439.711	386.591	4.56714	1.00946	2.11228	-0.0654287	2.17771	DIAPH1	chr5:140905666:-	-
chr5:133724985-133725042:mpeak_58436|chr5_133706866_133725915_UBE2B_NM_+|	214.777	2.53369	0.861385	2.94142	0.00326716	0.188116	5.63848	16.6135	0.992077	1.07772	3.32695	360.863	470.716	330.362	450.489	507.692	2.67587	0.418826	2.62873	-0.0468533	2.67559	UBE2B	chr5:133725045:+	chr5_134389351_+
chr5:107633437-107633487:mpeak_57782|chr5_107197561_107717799_FBXL17_NM_-|	104.651	2.57188	0.905611	2.83993	0.00451228	0.216531	4.51078	7.75296	1.98415	0	1.99617	144.345	188.286	235.122	257.576	204.94	3.68689	0.570542	2.20841	-0.483592	2.692	FBXL17	chr5:107633436:-;chr5:107633475:-	chr5_108297736_-;chr5_108297775_-
chr5:10284683-10284743:mpeak_55996|chr5_10280744_10308168_CMBL_NM_-|	149.672	2.69621	0.997771	2.70223	0.00688752	0.256967	4.51078	9.9681	0.992077	1.07772	0.665389	346.203	335.593	257.94	262.965	276.802	2.12364	0.342882	2.9892	0.358443	2.63076	CMBL	chr5:10284687:-	chr5_10284576_-
chr4:95373602-95373741:mpeak_54230|chr4_95373007_95376969_PDLIM5_NR_+mpeak_54230|chr4_95373007_95585128_PDLIM5_NM_+||	330.223	1.64393	0.711755	2.30969	0.0209054	0.34999	15.7877	8.86053	2.97623	14.0104	3.99233	433.035	489.544	765.884	893.433	674.705	2.67167	0.898834	0.817505	-0.75411	1.57161	PDLIM5	chr4:95373735:+	chr4_94452601_+
chr4:111118724-111118775:mpeak_54615|chr4_110972918_111119820_ELOVL6_NM_-|	315.234	1.5418	0.736329	2.09391	0.0362683	0.41339	3.38309	7.75296	3.96831	5.38862	2.66156	427.397	356.636	789.694	879.423	676.035	1.42035	0.512482	0.474945	-0.995732	1.47068	ELOVL6	chr4:111118723:-	chr4_110197550_-
chr3:161085017-161085075:mpeak_51457|chr3_161064143_161089871_SPTSSB_NM_-|	1744.5	1.50492	0.504303	2.98415	0.00284365	0.176823	19.1708	16.6135	16.8653	10.7772	13.9732	2266.67	1757.71	3803.62	4911.19	4628.45	0.889189	0.311886	0.367161	-1.14431	1.51147	SPTSSB	chr3:161085018:-	chr3_161367211_-
chr3:10353242-10353356:mpeak_47906|chr3_10343058_10362872_SEC13_NM_-|	1556.32	1.5346	0.684888	2.24066	0.025048	0.370205	7.89387	25.474	8.9287	9.69951	5.32311	2293.73	2845.34	2670.67	3767.72	3928.46	0.649298	0.231038	1.06332	-0.427436	1.49075	SEC13	chr3:10353260:-;chr3:10353298:-	chr3_10311558_-;chr3_10311622_-
chr22:17578342-17578400:mpeak_46378|chr22_17565848_17589196_IL17RA_NM_+|	136.587	1.7253	0.744805	2.31645	0.0205337	0.348224	7.89387	7.75296	1.98415	4.3109	1.33078	245.838	293.505	273.813	267.276	262.163	2.90109	0.949369	1.62187	0.0103119	1.61156	IL17RA	chr22:17578396:+	chr22_17097504_+
chr21:44267770-44267905:mpeak_46091|chr21_44263391_44299699_WDR4_NM_-|	138.95	5.05836	1.36219	3.71342	0.000204479	0.0645525	4.51078	7.75296	0	0	0	294.329	294.613	264.885	329.783	193.628	2.08234	0	Inf	0.164348	Inf	WDR4	chr21:44267773:-	chr21_42847664_-;chr21_42847715_-
chr20:49571718-49571828:mpeak_44986|chr20_49551773_49575060_DPM1_NM_-|	205.46	1.36697	0.66527	2.05475	0.0399028	0.419972	14.66	5.53783	5.95246	6.46634	2.66156	366.501	348.883	377.981	460.188	465.772	2.82336	1.15652	1.00649	-0.281126	1.28762	DPM1	chr20:49571732:-	chr20_50955156_-
chr20:46362918-46362999:mpeak_44782|chr20_46287136_46415360_SULF2_NM_-|	389.029	1.22837	0.617161	1.99035	0.0465525	0.441473	15.7877	12.1832	7.93662	8.62179	5.32311	666.468	714.38	747.034	655.256	1057.3	2.02564	0.88964	0.93918	-0.247903	1.18708	SULF2	chr20:46362917:-;chr20:46362943:-	chr20_47734180_-
chr20:46258777-46258835:mpeak_44744|chr20_46130600_46282149_NCOA3_NM_+|	1596.36	2.44992	0.975894	2.51044	0.0120582	0.300831	4.51078	11.0757	0.992077	3.23317	0	3150.78	3941.83	2584.36	2487.39	3779.41	0.219756	0.0477367	2.46815	0.265413	2.20273	NCOA3	chr20:46258828:+	chr20_47630083_+
chr20:46156041-46156091:mpeak_44732|chr20_46130600_46282149_NCOA3_NM_+|	1595.76	2.41172	1.06715	2.25997	0.0238229	0.362779	5.63848	5.53783	1.98415	0	0.665389	3150.78	3941.83	2584.36	2487.39	3779.41	0.157577	0.0299344	2.66159	0.265413	2.39618	NCOA3	chr20:46156094:+	-
chr20:43534692-43534750:mpeak_44588|chr20_43514239_43535022_YWHAB_NM_+|	5120.85	1.76717	0.791702	2.23211	0.0256078	0.370703	7.89387	5.53783	0.992077	2.15545	2.66156	9989.13	10152	11462.5	11057.4	8528.29	0.0666881	0.0187099	1.79422	-0.039406	1.83363	YWHAB	chr20:43534697:+	chr20_44906068_+
chr20:30150410-30150470:mpeak_44090|chr20_30102212_30156922_HM13_NM_+|	755.33	1.81656	0.899997	2.0184	0.0435493	0.433276	9.02157	2.21513	0.992077	5.38862	0	1357.75	1435.41	1576.41	1790.1	1376.02	0.402295	0.134542	1.40139	-0.178802	1.5802	HM13	chr20:30150466:+	chr20_31562667_+
chr2:242181869-242181958:mpeak_43426|chr2_242169102_242255115_HDLBP_NM_-|	278.185	1.91452	0.901818	2.12296	0.0337575	0.403051	2.25539	8.86053	2.97623	0	1.33078	544.677	573.719	579.373	594.904	473.757	0.993916	0.261342	1.95283	0.0256483	1.92718	HDLBP	chr2:242181928:-	-
chr2:220249731-220249784:mpeak_42931|chr2_220239064_220252662_DNPEP_NM_-|	246.875	3.58438	1.14103	3.14135	0.00168168	0.162271	10.1493	7.75296	1.98415	0	0	519.868	605.839	456.356	442.944	423.853	1.59031	0.149957	3.7585	0.351813	3.40669	DNPEP	chr2:220249733:-	-
chr19:55649383-55649446:mpeak_37521|chr19_55644328_55660722_TNNT1_NM_-|	129.257	1.46952	0.607338	2.41961	0.015537	0.322854	11.277	12.1832	3.96831	3.23317	5.9885	243.582	233.696	285.718	241.41	251.517	4.91541	1.69397	1.41573	-0.121172	1.53691	TNNT1	chr19:55649333:-;chr19:55649367:-;chr19:55649400:-	-
chr19:46331395-46331458:mpeak_36873|chr19_46318955_46366548_SYMPK_NM_-|	189.802	2.39955	0.963665	2.49002	0.0127736	0.306112	2.25539	11.0757	1.98415	3.23317	0	334.926	343.346	387.902	322.239	491.057	1.96545	0.434343	1.93837	-0.239578	2.17795	SYMPK	chr19:46331389:-	chr19_45828157_-
chr19:35742241-35742301:mpeak_36241|chr19_35739558_35758726_LSR_NM_+|	406.269	1.35942	0.655385	2.07424	0.038057	0.41873	11.277	6.6454	7.93662	1.07772	2.66156	760.067	769.759	836.321	843.858	823.086	1.17153	0.466427	1.20319	-0.125482	1.32867	LSR	chr19:35742304:+	-
chr19:16675823-16675909:mpeak_35640|chr19_16664720_16683193_SLC35E1_NM_-|	608.96	2.93211	0.848019	3.4576	0.000545011	0.0963625	13.5323	5.53783	4.96039	0	0	1114.16	1072.12	1265.89	1347.15	1266.24	0.872263	0.127869	2.52776	-0.242344	2.7701	SLC35E1	chr19:16675825:-	chr19_16565016_-
chr19:16297416-16297466:mpeak_35616|chr19_16296211_16301697_FAM32A_NM_+|	806.932	1.73675	0.664598	2.61324	0.00896896	0.27572	9.02157	12.1832	2.97623	7.54407	1.33078	1419.77	1579.39	1508.95	1696.34	1831.82	0.707025	0.235276	1.42433	-0.163074	1.58741	FAM32A	chr19:16297471:+	chr19_16186672_+
chr17:62498394-62498462:mpeak_32519|chr17_62496444_62502484_DDX5_NM_-|	357.566	2.79296	1.00398	2.7819	0.00540417	0.237221	2.25539	22.1513	1.98415	1.07772	1.99617	631.51	804.093	613.104	752.251	745.236	1.7001	0.239651	2.85559	0.0289721	2.82662	DDX5	chr17:62498393:-	chr17_64502276_-
chr17:61905490-61905578:mpeak_32479|chr17_61904769_61909275_PSMC5_NM_+|	1072.44	1.55521	0.661305	2.35172	0.0186866	0.338816	22.5539	6.6454	3.96831	8.62179	5.32311	2016.32	1830.81	2501.03	2374.23	1954.91	0.75899	0.262266	1.28987	-0.243177	1.53305	PSMC5	chr17:61905565:+	-
chr17:59476124-59476174:mpeak_32289|chr17_59471108_59476967_TBX2-AS1_NR_-|	266.204	1.79841	0.76447	2.35249	0.0186484	0.338816	9.02157	6.6454	1.98415	4.3109	1.33078	562.72	464.07	564.492	591.67	455.792	1.52582	0.47308	1.62372	-0.0657063	1.68943	TBX2-AS1	chr17:59476123:-	chr17_61398763_-
chr17:59313418-59313471:mpeak_32269|chr17_58755171_59469337_BCAS3_NM_+|	753.069	1.53652	0.719555	2.13537	0.0327305	0.397781	10.1493	5.53783	0.992077	2.15545	4.65772	1438.94	1456.45	1603.2	1684.48	1324.12	0.541796	0.169245	1.59202	-0.0866112	1.67864	BCAS3	chr17:59313468:+	chr17_61236107_+
chr17:58601280-58601340:mpeak_32239|chr17_58525195_58603601_APPBP2_NM_-|	803.174	3.51605	0.940816	3.73724	0.000186053	0.0610848	12.4047	5.53783	0.992077	3.23317	0	1125.44	1322.43	1650.82	1630.6	2280.29	0.732982	0.0759704	2.67123	-0.599034	3.27027	APPBP2	chr17:58601281:-	-
chr16:84096215-84096302:mpeak_28884|chr16_84088250_84150548_MBTPS1_NM_-|	320.722	2.89781	0.913834	3.17105	0.0015189	0.15802	7.89387	8.86053	2.97623	0	0.665389	606.7	639.066	553.579	767.339	620.143	1.34491	0.18761	2.78685	-0.0548499	2.8417	MBTPS1	chr16:84096218:-;chr16:84096251:-	chr16_84062616_-;chr16_84062666_-
chr16:75297773-75297826:mpeak_28692|chr16_75263921_75301951_BCAR1_NM_-|	107.84	2.6674	1.09067	2.44566	0.0144587	0.313133	5.63848	6.6454	0.992077	2.15545	0	170.282	276.892	162.701	238.177	214.921	2.747	0.511129	2.54944	0.12334	2.4261	BCAR1	chr16:75297774:-	chr16_75263876_-
chr16:56839507-56839602:mpeak_28026|chr16_56764016_56878410_NUP93_NM_+|	528.936	1.98352	0.837105	2.36949	0.0178125	0.334243	5.63848	9.9681	6.94454	0	1.33078	795.025	950.292	911.719	1410.74	1197.7	0.894197	0.235084	1.50023	-0.427189	1.92742	NUP93	chr16:56839598:+	chr16_56805639_+;chr16_56805680_+
chr16:287258-287316:mpeak_26218|chr16_284544_319518_ITFG3_NR_+mpeak_26218|chr16_284544_314809_ITFG3_NM_+||	164.896	2.56975	0.986423	2.60512	0.00918415	0.278041	12.4047	3.3227	4.96039	0	0	303.35	300.15	353.18	390.136	281.46	2.60602	0.484046	2.24971	-0.178918	2.42863	ITFG3	chr16:287317:+	chr16_237319_+
chr12:16053879-16053949:mpeak_15394|chr12_16035287_16055850_STRAP_NM_+|	428.836	1.32761	0.609285	2.17897	0.0293339	0.387718	20.2985	13.2908	6.94454	1.07772	9.98084	802.919	924.818	769.852	907.443	831.736	1.94412	0.717532	1.48472	0.0467155	1.438	STRAP	chr12:16053946:+	-
chr12:124880532-124880687:mpeak_19037|chr12_124810129_125052010_NCOR2_NM_-|	336.408	3.65196	1.14788	3.18149	0.00146519	0.156186	4.51078	13.2908	0.992077	1.07772	0	752.173	744.285	602.191	598.137	647.424	1.18958	0.112017	3.6894	0.280743	3.40866	NCOR2	chr12:124880533:-;chr12:124880636:-	chr12_124395988_-
chr12:112452562-112452688:mpeak_18333|chr12_112451151_112459953_ERP29_NM_+|	2147.99	3.09331	0.987703	3.13183	0.00173723	0.162271	11.277	5.53783	0.992077	2.15545	0	4719.41	4438.02	4399.86	4319.52	3583.12	0.183619	0.0255844	3.0024	0.159025	2.84338	ERP29	chr12:112452616:+	chr12_112014812_+
chr12:102120155-102120326:mpeak_17908|chr12_102091416_102122678_CHPT1_NM_+|	326.944	1.54814	0.707881	2.18701	0.0287417	0.384245	14.66	9.9681	6.94454	2.15545	3.99233	567.231	696.659	465.284	730.697	771.851	1.9486	0.665317	1.49655	-0.0537738	1.55032	CHPT1	chr12:102120327:+	chr12_101726439_+;chr12_101726565_+
chr11:65826696-65826817:mpeak_12999|chr11_65819815_65836144_SF3B2_NM_+|	489.676	1.2327	0.600391	2.05317	0.0400563	0.419972	22.5539	18.8286	15.8732	6.46634	5.9885	805.175	1072.12	999.022	1122.99	827.744	2.20437	0.960354	1.13175	-0.0669739	1.19873	SF3B2	chr11:65826810:+	chr11_66059338_+
chr10:89625788-89625840:mpeak_9817|chr10_89623194_89725043_PTEN_NM_+|	152.114	2.70753	0.839736	3.22426	0.00126298	0.145572	7.89387	7.75296	0.992077	1.07772	2.66156	284.179	190.501	320.441	355.649	349.995	3.29629	0.461108	2.31051	-0.527158	2.83766	PTEN	chr10:89625841:+	chr10_87866081_+
chr10:65359782-65359836:mpeak_9119|chr10_65281122_65380572_REEP3_NM_+|	212.824	5.23255	1.31839	3.96889	7.22081e-05	0.0423346	3.38309	9.9681	0	0	0	405.97	481.791	378.974	420.312	427.845	1.50392	0	Inf	0.117918	Inf	REEP3	chr10:65359836:+	chr10_63600072_+
chr10:127503600-127503671:mpeak_11054|chr10_127477574_127511837_UROS_NM_-|	55.6062	3.9949	1.36167	2.93383	0.00334803	0.188958	3.38309	7.75296	0.992077	0	0	120.663	108.542	97.2236	125.016	92.4891	4.85856	0.315217	4.0736	0.127492	3.94611	UROS	chr10:127503594:-	-
chr10:117825075-117825137:mpeak_10736|chr10_117824055_118033126_GFRA1_NM_-|	1273.13	1.94797	0.794057	2.45318	0.0141599	0.312431	36.0863	16.6135	6.94454	0	2.66156	3668.39	3761.3	2245.07	1323.44	1670.79	0.709313	0.183347	3.04074	1.08889	1.95185	GFRA1	chr10:117825075:-	-
chr10:104925889-104925939:mpeak_10473|chr10_104849665_104953063_NT5C2_NM_-|	131.633	3.94367	1.22054	3.23108	0.00123323	0.145572	4.51078	13.2908	1.98415	0	0	254.859	260.278	226.194	219.856	335.356	3.4557	0.253921	3.75037	-0.0161517	3.76652	NT5C2	chr10:104925887:-	chr10_103166132_-
chr1:204501994-204502058:mpeak_6489|chr1_204485506_204518240_MDM4_NM_+|	143.018	3.10278	0.932378	3.32781	0.000875307	0.123871	5.63848	5.53783	1.98415	1.07772	0.665389	181.559	201.577	330.362	366.426	335.356	2.91706	0.361119	2.16922	-0.844753	3.01397	MDM4	chr1:204502047:+	chr1_204532930_+
chr9:114155044-114155103:mpeak_72439|chr9_114124449_114247025_KIAA0368_NM_-|	134.502	3.77018	1.16492	3.23643	0.00121034	0.145572	12.4047	7.75296	0.992077	1.07772	0	271.775	332.27	218.257	217.7	282.79	3.33711	0.287973	3.86872	0.334132	3.53459	KIAA0368	-	chr9_111392773_-
chr7:66417656-66417717:mpeak_65339|chr7_66386202_66420488_TMEM248_NM_+|	264.583	2.81694	1.03818	2.71335	0.00666062	0.252596	3.38309	7.75296	2.97623	0	0	479.271	508.373	471.237	581.971	590.866	1.12754	0.181028	2.48864	-0.15025	2.63889	TMEM248	-	chr7_66952727_+
chr7:1151639-1151694:mpeak_63923|chr7_1037440_1177893_C7orf50_NM_-|	383.648	2.59323	1.05303	2.46264	0.0137918	0.310145	2.25539	8.86053	1.98415	1.07772	0	711.576	860.579	754.971	847.091	648.089	0.70705	0.136074	2.4451	0.0676843	2.37742	C7orf50	-	chr7_1111965_-
chr7:107558412-107558511:mpeak_66437|chr7_107531551_107559638_DLD_NM_+|	296.669	3.78237	0.812174	4.6571	3.20697e-06	0.0087316	24.8093	14.3984	1.98415	0	1.99617	572.869	585.903	540.682	689.743	534.307	3.38355	0.225548	3.88514	-0.0218906	3.90703	DLD	-	chr7_107918016_+
chr5:180236582-180236632:mpeak_59851|chr5_180220097_180237137_MGAT1_NM_-|	273.863	5.02888	1.3863	3.62756	0.000286107	0.0752264	6.76617	4.43027	0	0	0	436.418	682.261	390.879	619.691	598.185	1.00086	0	Inf	0.0608146	Inf	MGAT1	-	chr5_180809575_-
chr4:184161364-184161420:mpeak_55633|chr4_184020462_184236815_WWC2_NM_+|	87.232	2.17827	0.854051	2.55052	0.0107563	0.291119	6.76617	7.75296	2.97623	2.15545	1.33078	151.111	140.661	136.907	186.446	236.213	4.97619	1.15491	1.75276	-0.354504	2.10727	WWC2	-	chr4_183240261_+
chr3:193384967-193385074:mpeak_52122|chr3_193310932_193412394_OPA1_NM_+|	106.007	4.07532	1.17183	3.47774	0.000505656	0.092547	11.277	6.6454	0.992077	1.07772	0	166.899	224.836	202.384	209.078	236.879	4.57512	0.319246	3.69916	-0.141912	3.84107	OPA1	-	chr3_193667183_+
chr20:47855513-47855602:mpeak_44872|chr20_47835831_47860352_DDX27_NM_+|	424.061	2.08617	0.741243	2.81442	0.00488652	0.22407	9.02157	11.0757	2.97623	4.3109	0	904.412	917.065	842.274	825.536	723.943	1.10335	0.304677	2.04854	0.192002	1.85653	DDX27	-	chr20_49238989_+;chr20_49239002_+
chr2:62104064-62104191:mpeak_39279|chr2_62095841_62115806_CCT4_NM_-|	645.526	1.73529	0.836544	2.07435	0.0380464	0.41873	10.1493	2.21513	2.97623	1.07772	1.99617	1096.12	1332.4	1142.87	1512.05	1353.4	0.509132	0.150939	1.61612	-0.137957	1.75407	CCT4	-	chr2_61876929_-;chr2_61876994_-
chr2:230723483-230723548:mpeak_43098|chr2_230632466_230786725_TRIP12_NM_-|	385.841	1.99175	0.820891	2.42633	0.0152526	0.320187	5.63848	7.75296	1.98415	1.07772	1.99617	692.405	814.061	694.454	880.5	758.544	0.888931	0.216758	1.98962	-0.0463633	2.03599	TRIP12	-	chr2_229858716_-;chr2_229858834_-
chr18:163384-163461:mpeak_33376|chr18_158482_211132_USP14_NM_+|	256.567	1.41522	0.570592	2.48027	0.0131283	0.306112	12.4047	25.474	4.96039	8.62179	7.98467	486.037	506.158	438.498	503.297	572.235	3.81767	1.42447	1.39753	-0.0247361	1.42227	USP14	-	chr18_163435_+
chr17:58151500-58151598:mpeak_32181|chr17_58121495_58156292_HEATR6_NM_-|	248.027	5.43594	1.29024	4.21312	2.51872e-05	0.0212295	9.02157	7.75296	0	0	0	489.42	594.763	470.245	461.266	447.807	1.5472	0	Inf	0.237616	Inf	HEATR6	-	chr17_60074178_-
chr17:18152628-18152676:mpeak_30177|chr17_18148586_18162230_FLII_NM_-|	707.959	3.49383	1.0035	3.48165	0.000498338	0.092547	13.5323	5.53783	0.992077	2.15545	0	1311.51	1436.51	1684.55	1267.4	1357.39	0.69396	0.0730395	3.18399	-0.0641115	3.2481	FLII	-	chr17_18249365_-
chr17:17721958-17722222:mpeak_30146|chr17_17716165_17740325_SREBF1_NM_-|	240.685	5.77214	1.38501	4.16759	3.07831e-05	0.0229698	5.63848	13.2908	0	0	0	400.332	587.01	357.148	401.991	641.435	1.9172	0	Inf	0.0805663	Inf	SREBF1	-	chr17_17818768_-
chr16:74334947-74335021:mpeak_28634|chr16_74330672_74339186_PSMD7_NM_+|	587.026	1.85935	0.638685	2.91122	0.00360025	0.193906	5.63848	9.9681	2.97623	7.54407	3.99233	746.535	624.667	1471.25	1487.26	1510.43	1.13817	0.324744	0.689807	-1.11953	1.80934	PSMD7	-	chr16_74301111_+
chr16:68842380-68842473:mpeak_28329|chr16_68771194_68867192_CDH1_NM_+|	2027.73	1.78109	0.731819	2.43378	0.0149422	0.319907	20.2985	8.86053	9.92077	4.3109	4.65772	2758.34	3573.01	3270.88	4525.36	6101.62	0.46055	0.135916	1.21133	-0.549315	1.76064	CDH1	-	chr16_68808552_+
chr15:50884770-50884906:mpeak_24547|chr15_50854005_50979012_TRPM7_NM_-|	211.106	2.9274	0.97362	3.00672	0.00264087	0.172034	15.7877	12.1832	3.96831	0	0	444.312	612.484	275.798	292.063	454.461	2.64677	0.388167	3.4023	0.632811	2.76949	TRPM7	-	chr15_50592581_-
chr14:24454443-24454493:mpeak_21108|chr14_24439082_24475094_DHRS4L2_NM_+|	138.827	5.34695	1.31167	4.07645	4.57275e-05	0.0297041	9.02157	6.6454	0	0	0	304.478	296.828	291.671	264.042	215.586	2.60549	0	Inf	0.22577	Inf	DHRS4L2	-	chr14_23985313_+
chr12:46354495-46354588:mpeak_15969|chr12_46315977_46384401_SCAF11_NM_-|	264.499	2.5291	0.757577	3.33841	0.000842599	0.122351	10.1493	25.474	1.98415	8.62179	2.66156	372.14	484.006	469.253	641.246	629.458	4.16089	0.762519	2.00989	-0.43816	2.44805	SCAF11	-	chr12_45960698_-
chr12:104714981-104715099:mpeak_18007|chr12_104609556_104742130_TXNRD1_NM_+mpeak_18007|chr12_104609556_104742130_TXNRD1_NM_+||	136.818	2.25195	1.01912	2.2097	0.0271261	0.377787	7.89387	5.53783	4.96039	0	0	227.795	292.398	188.495	355.649	285.452	2.58207	0.597928	2.02208	-0.0884012	2.11048	TXNRD1	-	chr12_104321333_+
chr11:8706257-8706394:mpeak_11489|chr11_8703994_8707224_RPL27A_NM_+|	26241.9	2.07416	0.959235	2.1623	0.0305949	0.389942	19.1708	6.6454	8.9287	0	0.665389	52741.2	52674.7	54309.3	51533.5	51124.5	0.0244899	0.00611215	2.01302	0.0105914	2.00243	RPL27A	-	chr11_8684892_+
chr11:85468656-85468794:mpeak_13759|chr11_85406383_85522202_SYTL2_NM_-|	263.71	2.43214	0.805236	3.0204	0.00252439	0.168457	6.76617	6.6454	4.96039	0	1.33078	402.587	352.206	606.159	551.795	704.647	1.77685	0.337762	1.67704	-0.718202	2.39524	SYTL2	-	chr11_85757720_-;chr11_85757739_-
chr10:28824485-28824646:mpeak_8484|chr10_28821516_28908465_WAC_NM_+|	304.336	1.53389	0.747647	2.05162	0.0402066	0.419972	14.66	11.0757	0.992077	7.54407	0.665389	713.831	860.579	466.276	426.779	540.961	1.63463	0.641662	2.06879	0.719713	1.34908	WAC	-	chr10_28535613_+;chr10_28535717_+
chr1:19667009-19667059:mpeak_733|chr1_19666111_19812135_CAPZB_NM_-|	1279.9	4.75432	1.4834	3.20501	0.00135059	0.151859	0	12.1832	0	0	0	3086.5	3042.48	2209.36	1701.73	2746.73	0.19878	0	Inf	0.465564	Inf	CAPZB	-	chr1_19340484_-
chr13:25906193-25906305:mpeak_19467|chr13_25875665_25914102_NUPL1_NM_+|	68.567	1.86249	0.92974	2.00324	0.045152	0.439615	3.38309	7.75296	2.97623	0	1.99617	130.813	117.402	169.645	146.57	105.131	4.48646	1.18012	1.74819	-0.178458	1.92664	NUPL1	-	-
chr1:41213197-41213247:mpeak_1828|chr1_41157241_41236068_NFYC_NM_+|	126.941	1.51957	0.656444	2.31486	0.0206208	0.348782	9.02157	12.1832	2.97623	4.3109	3.99233	214.262	274.676	229.17	258.654	260.167	4.3369	1.50797	1.49565	-0.0284045	1.52406	NFYC	-	-
chr3:49065134-49065200:mpeak_48946|chr3_49061837_49066875_IMPDH2_NM_-|	161.405	2.00633	0.670269	2.99331	0.00275965	0.17291	10.1493	13.2908	3.96831	1.07772	5.32311	243.582	299.043	315.481	398.758	323.379	4.31975	0.999323	1.76164	-0.350284	2.11193	IMPDH2	-	-
chr12:88568460-88568510:mpeak_17543|chr12_88536072_88588614_TMTC3_NM_+|	121.768	2.35872	0.964401	2.44579	0.0144535	0.313133	7.89387	0	1.98415	0	5.32311	94.7264	91.928	351.195	309.307	355.318	4.22914	0.719347	0.696363	-1.85924	2.5556	TMTC3	-	-
chr3:38224487-38224574:mpeak_48539|chr3_38207025_38294307_OXSR1_NM_+|	79.6967	4.46165	1.4096	3.1652	0.00154976	0.159006	13.5323	7.75296	0	0	0	209.751	304.581	75.3979	58.1971	127.755	4.13844	0	Inf	1.56168	Inf	OXSR1	-	-
chr1:149895922-149895976:mpeak_4456|chr1_149895621_149900144_SF3B4_NM_-|	77.928	2.42835	1.05039	2.31184	0.0207863	0.349619	3.38309	9.9681	0	0	2.66156	148.856	174.995	106.152	156.27	176.994	4.12263	0.605703	2.91159	0.144708	2.76688	SF3B4	-	-
chr7:151800316-151800366:mpeak_67342|chr7_151722758_151818630_GALNT11_NM_+|	67.6259	4.93982	1.36672	3.61435	0.000301097	0.0752264	5.63848	6.6454	0	0	0	139.834	158.382	96.2315	113.161	156.366	4.11912	0	Inf	0.290428	Inf	GALNT11	-	-
chrX:153677249-153677305:mpeak_75873|chrX_153672472_153678771_FAM50A_NM_+|	107.686	2.01506	0.838101	2.40432	0.0162027	0.327504	6.76617	7.75296	5.95246	1.07772	0.665389	173.665	179.426	258.932	262.965	179.655	4.11201	1.09694	1.50082	-0.405548	1.90636	FAM50A	-	-
chr11:20398210-20398269:mpeak_11875|chr11_20385230_20404525_HTATIP2_NM_+|	139.763	2.56985	0.82067	3.1314	0.00173975	0.162271	9.02157	7.75296	1.98415	0	3.32695	204.113	235.912	260.916	385.825	288.779	3.81218	0.567716	2.24415	-0.503223	2.74737	HTATIP2	-	-
chr2:242192367-242192449:mpeak_43429|chr2_242169102_242255115_HDLBP_NM_-|	282.315	2.24218	0.932943	2.40334	0.0162459	0.327504	27.0647	15.5059	10.9129	3.23317	0	544.677	573.719	579.373	594.904	473.757	3.8064	0.858358	2.17442	0.0256483	2.14878	HDLBP	-	-
chr17:3626633-3626688:mpeak_29506|chr17_3618236_3704537_ITGAE_NM_-|	92.8284	3.43326	1.25034	2.74586	0.00603526	0.244389	6.76617	8.86053	0.992077	0	0.665389	159.005	254.74	115.081	205.845	176.328	3.77689	0.333324	3.82192	0.319722	3.5022	ITGAE	-	-
chr11:118425166-118425223:mpeak_14392|chr11_118415726_118436791_IFT46_NM_-|	142.726	1.75182	0.739555	2.36874	0.0178486	0.334243	7.89387	6.6454	6.94454	0	3.99233	217.645	170.565	294.647	364.271	354.652	3.7452	1.07904	0.995716	-0.799572	1.79529	IFT46	-	-
chr17:65358933-65358985:mpeak_32615|chr17_65337168_65362721_PSMD12_NM_-|	128.403	1.75631	0.782404	2.24476	0.0247838	0.369865	10.1493	6.6454	4.96039	0	3.32695	230.05	229.266	200.4	315.773	283.456	3.65645	1.0364	1.60399	-0.21488	1.81887	PSMD12	-	-
chr6:88216128-88216236:mpeak_62169|chr6_88182642_88221116_SLC35A1_NM_+|	116.035	2.10781	0.861273	2.44732	0.0143922	0.313133	11.277	5.53783	2.97623	1.07772	1.33078	268.392	215.975	257.94	170.28	225.567	3.4715	0.823622	2.22775	0.152242	2.0755	SLC35A1	-	-
chr1:211966751-211966801:mpeak_6727|chr1_211923392_212004114_LPGAT1_NM_-|	117.01	2.12827	0.862683	2.46704	0.0136236	0.308901	9.02157	4.43027	0	1.07772	3.99233	214.262	178.318	225.202	231.711	302.087	3.42652	0.667993	1.99269	-0.366147	2.35884	LPGAT1	-	-
chr15:78562829-78563021:mpeak_25594|chr15_78556486_78572586_DNAJA4_NM_+|	436.163	1.46196	0.644955	2.26676	0.0234048	0.361951	31.5755	22.1513	15.8732	11.855	3.99233	816.452	855.041	759.931	1075.57	769.19	3.2143	1.21782	1.34519	-0.0550117	1.4002	DNAJA4	-	-
chr19:11145677-11145815:mpeak_35271|chr19_11071597_11172459_SMARCA4_NM_+|	191.209	1.72525	0.69045	2.49873	0.0124638	0.30409	16.9154	7.75296	2.97623	5.38862	2.66156	345.075	429.736	342.267	424.623	334.691	3.1838	1.00096	1.74666	0.0773031	1.66936	SMARCA4	-	-
chr4:107240155-107240205:mpeak_54529|chr4_107236766_107268682_AIMP1_NM_+|	82.8176	3.95761	1.44397	2.74078	0.00612944	0.244721	0	11.0757	0.992077	0	0	183.814	165.027	156.748	168.125	142.393	3.17498	0.212315	4.06576	0.16329	3.90247	AIMP1	-	-
chr17:60073856-60073925:mpeak_32349|chr17_60023961_60142643_MED13_NM_-|	171.249	1.60161	0.690394	2.31986	0.0203487	0.345802	6.76617	12.1832	3.96831	2.15545	4.65772	298.839	303.473	303.576	347.027	429.841	3.14611	0.997875	1.39856	-0.258078	1.65664	MED13	-	-
chr19:54629952-54630001:mpeak_37477|chr19_54618789_54634737_PRPF31_NM_+|	109.57	1.96654	0.958241	2.05224	0.0401461	0.419972	10.1493	2.21513	4.96039	0	0.665389	174.793	225.944	199.408	258.654	218.913	3.08542	0.831018	1.72103	-0.171485	1.89252	PRPF31	-	-
chr4:166033894-166033946:mpeak_55438|chr4_166000948_166034024_TMEM192_NM_-|	192.415	1.63412	0.81283	2.01041	0.0443874	0.438426	21.4262	7.75296	0	2.15545	5.9885	498.441	456.317	355.164	274.82	302.087	3.05618	0.873749	2.4261	0.619661	1.80644	TMEM192	-	-
chrX:80458024-80458078:mpeak_74937|chrX_80457302_80552693_SH3BGRL_NM_+|	117.174	2.40213	1.17551	2.04348	0.0410045	0.42442	1.1277	12.1832	0	0	3.32695	169.154	272.461	190.479	274.82	248.19	3.01414	0.466293	2.5853	-0.107136	2.69244	SH3BGRL	-	-
chr14:92609339-92609389:mpeak_23152|chr14_92588297_92627995_CPSF2_NM_+|	159.294	1.93355	0.865205	2.23479	0.0254314	0.370205	9.02157	7.75296	2.97623	5.38862	0	255.987	332.27	289.687	425.701	264.159	2.85157	0.853951	1.58882	-0.150706	1.73953	CPSF2	-	-
chr3:171979722-171979773:mpeak_51603|chr3_171757417_172114953_FNDC3B_NM_+|	95.091	4.69063	1.33135	3.52321	0.000426359	0.0858621	7.89387	5.53783	0	0	0	252.604	228.159	176.59	153.037	127.089	2.79383	0	Inf	0.65899	Inf	FNDC3B	-	-
chr14:102453042-102453113:mpeak_23465|chr14_102430864_102516771_DYNC1H1_NM_+|	465.711	2.08907	0.610487	3.42197	0.000621683	0.0980566	31.5755	23.2589	10.9129	0	5.32311	1026.2	983.519	929.577	867.568	779.171	2.72846	0.630201	2.34085	0.22665	2.1142	DYNC1H1	-	-
chr5:132400688-132400743:mpeak_58376|chr5_132387661_132439924_HSPA4_NM_+|	162.022	2.10412	0.837949	2.51104	0.0120376	0.300831	7.89387	9.9681	0	5.38862	0.665389	324.776	374.357	296.631	347.027	253.513	2.55487	0.674788	2.14589	0.225147	1.92074	HSPA4	-	-
chrX:123109911-123109965:mpeak_75442|chrX_123094409_123234423_STAG2_NM_+|	141.841	2.62071	1.00026	2.62002	0.00879242	0.27572	4.51078	7.75296	1.98415	0	1.33078	224.411	287.967	218.257	308.229	363.968	2.39349	0.372275	2.47231	-0.212368	2.68468	STAG2	-	-
chr17:685398-685446:mpeak_29298|chr17_663478_685571_GLOD4_NM_-|	113.286	2.55663	1.07188	2.38519	0.0170704	0.330813	3.38309	7.75296	2.97623	0	0	249.221	218.191	174.606	233.866	242.867	2.3825	0.456941	2.48864	0.106247	2.38239	GLOD4	-	-
chr22:32797844-32797894:mpeak_47017|chr22_32784086_32808274_RTCB_NM_-|	260.025	3.4767	0.918588	3.78483	0.000153814	0.0576946	11.277	11.0757	0.992077	0	1.99617	418.375	528.309	518.856	659.567	449.803	2.36115	0.183528	3.48804	-0.197384	3.68542	RTCB	-	-
chr2:85804682-85804784:mpeak_39915|chr2_85804613_85808698_VAMP8_NM_+|	1056.67	1.05618	0.50744	2.08139	0.0373982	0.416713	48.4909	38.7648	21.8257	28.0208	10.6462	2168.56	2180.8	2132.97	2127.43	1809.19	2.00618	0.996654	1.11345	0.104166	1.00928	VAMP8	-	-
chr7:99695306-99695381:mpeak_66111|chr7_99690756_99699563_MCM7_NM_-|	380.587	1.3107	0.62724	2.08963	0.0366515	0.414374	13.5323	9.9681	10.9129	1.07772	7.31928	596.551	618.022	829.377	964.563	754.551	1.93487	0.757698	0.868313	-0.484231	1.35254	MCM7	-	-
chr1:1784641-1784733:mpeak_133|chr1_1718492_1822556_GNB1_NM_-|	788.305	1.48159	0.526957	2.81159	0.00492969	0.224794	31.5755	19.9362	13.8891	10.7772	6.65389	1296.85	1652.49	1499.03	1588.56	1763.28	1.74655	0.645661	1.30277	-0.132891	1.43566	GNB1	-	-
chr3:160227610-160227663:mpeak_51403|chr3_160219990_160283376_KPNA4_NM_-|	249.153	2.29513	1.12001	2.0492	0.0404428	0.420728	14.66	1.10757	4.96039	1.07772	0	471.377	435.274	560.524	488.209	514.346	1.73911	0.386296	1.96976	-0.200809	2.17057	KPNA4	-	-
chr12:46342217-46342336:mpeak_15966|chr12_46315977_46384401_SCAF11_NM_-|	261.867	1.77776	0.760048	2.339	0.0193352	0.342033	6.76617	7.75296	2.97623	1.07772	3.99233	372.14	484.006	469.253	641.246	629.458	1.69587	0.462442	1.43652	-0.43816	1.87468	SCAF11	-	-
chr14:31118744-31118796:mpeak_21228|chr14_31091459_31204791_SCFD1_NM_+|	155.495	3.04813	1.22832	2.48155	0.0130814	0.306112	4.51078	6.6454	1.98415	0	0	331.543	337.808	228.178	376.126	268.152	1.66672	0.227422	3.07621	0.202643	2.87357	SCFD1	-	-
chr14:61444282-61444364:mpeak_22126|chr14_61441912_61447797_TRMT5_NM_-|	232.364	5.53043	1.30878	4.22565	2.38253e-05	0.0212295	7.89387	6.6454	0	0	0	510.846	388.756	442.467	489.287	477.749	1.61619	0	Inf	-0.0628649	Inf	TRMT5	-	-
chr13:37563654-37563728:mpeak_19741|chr13_37524194_37573504_ALG5_NM_-|	317.962	2.86679	0.859326	3.33609	0.000849659	0.122351	11.277	5.53783	1.98415	0	1.99617	490.548	604.731	634.93	779.194	649.42	1.53521	0.192888	2.66374	-0.328863	2.9926	ALG5	-	-
chr11:68337250-68337372:mpeak_13209|chr11_68228185_68380533_PPP6R3_NM_+|	282.847	1.82448	0.734161	2.48512	0.0129507	0.306112	10.1493	7.75296	1.98415	3.23317	1.99617	522.123	652.357	494.055	585.204	549.611	1.52427	0.442853	1.89633	0.113113	1.78322	PPP6R3	-	-
chr2:99976969-99977025:mpeak_40304|chr2_99953833_100015769_EIF5B_NM_+|	188.175	3.31744	1.24355	2.66772	0.00763679	0.263702	7.89387	3.3227	0	0	1.33078	313.499	424.198	290.679	397.68	443.149	1.52048	0.117611	3.66025	-0.0321833	3.69244	EIF5B	-	-
chr12:101799620-101799765:mpeak_17902|chr12_101789448_101801598_ARL1_NM_-|	471.331	1.3176	0.638716	2.06288	0.0391237	0.419814	16.9154	6.6454	4.96039	3.23317	5.32311	875.092	1017.85	812.511	1020.6	950.176	1.24467	0.485636	1.38661	0.0288032	1.35781	ARL1	-	-
chr21:43969019-43969185:mpeak_46079|chr21_43919741_44000454_SLC37A1_NM_+|	185.326	3.46543	1.37885	2.51327	0.0119618	0.300253	2.25539	8.86053	0.992077	0	0	433.035	511.696	233.138	286.675	376.61	1.17662	0.110671	4.07099	0.660686	3.41031	SLC37A1	-	-
chr16:18515901-18515956:mpeak_27059|chr16_18511825_18573434_NOMO2_NM_-|	416.755	2.95265	0.896484	3.29359	0.000989152	0.133098	6.76617	9.9681	0.992077	2.15545	0.665389	789.387	793.018	750.011	968.874	845.71	1.05752	0.148675	2.7188	-0.111649	2.83045	NOMO2	-	-
chr16:88980136-88980188:mpeak_29116|chr16_88943683_89043504_CBFA2T3_NM_-|	203.136	4.37882	1.44023	3.04036	0.00236293	0.168315	2.25539	8.86053	0	0	0	498.441	554.891	312.504	202.612	451.799	1.05531	0	Inf	0.708461	Inf	CBFA2T3	-	-
chr12:51784859-51784914:mpeak_16316|chr12_51748276_51785200_GALNT6_NM_-|	858.351	1.39954	0.629904	2.22184	0.0262944	0.373257	15.7877	15.5059	9.92077	7.54407	4.65772	1697.18	1344.59	2143.88	2019.65	1324.79	1.0288	0.403084	1.08531	-0.266493	1.35181	GALNT6	-	-
chr11:47530340-47530398:mpeak_12327|chr11_47493654_47574792_CELF1_NM_-|	825.129	1.87125	0.635179	2.94602	0.00321891	0.188116	20.2985	8.86053	7.93662	2.15545	4.65772	1261.89	1603.76	1640.9	1845.06	1855.77	1.01754	0.276124	1.56821	-0.313483	1.8817	CELF1	-	-
chr2:174995696-174995746:mpeak_41850|chr2_174940255_175113365_OLA1_NM_-|	286.827	5.18261	1.32725	3.90476	9.43174e-05	0.0482829	3.38309	7.75296	0	0	0	561.592	536.062	587.31	658.489	513.68	1.01453	0	Inf	-0.0957621	Inf	OLA1	-	-
chr9:130272167-130272225:mpeak_73012|chr9_130269710_130341286_FAM129B_NM_-|	449.33	1.56097	0.729506	2.13976	0.0323739	0.397781	5.63848	8.86053	5.95246	2.15545	1.33078	700.299	898.236	930.569	994.739	945.518	0.907018	0.32878	1.20426	-0.259753	1.46401	FAM129B	-	-
chr6:36511166-36511259:mpeak_61194|chr6_36463691_36515293_STK38_NM_-|	263.382	3.67689	1.3241	2.7769	0.005488	0.237315	5.63848	5.53783	0.992077	0	0	560.465	688.906	505.959	436.478	429.841	0.894555	0.0722941	4.07881	0.449591	3.62922	STK38	-	-
chr6:42848768-42848826:mpeak_61360|chr6_42847670_42853993_RPL7L1_NM_+|	416.457	1.79952	0.904552	1.9894	0.0466567	0.441473	7.89387	3.3227	5.95246	2.15545	0	710.448	561.536	1141.88	977.496	753.886	0.881817	0.282185	1.05319	-0.590646	1.64384	RPL7L1	-	-
chr13:31735601-31735654:mpeak_19634|chr13_31711661_31736525_HSPH1_NM_-|	1065.39	1.76723	0.689469	2.56318	0.0103719	0.29109	20.2985	8.86053	8.9287	3.23317	2.66156	2121.2	1857.39	2366.1	2467.99	1797.22	0.7329	0.223537	1.56103	-0.152076	1.7131	HSPH1	-	-
chr19:16669490-16669544:mpeak_35638|chr19_16664720_16683193_SLC35E1_NM_-|	608.999	1.79266	0.744563	2.40767	0.0160546	0.327504	3.38309	12.1832	4.96039	3.23317	0.665389	1114.16	1072.12	1265.89	1347.15	1266.24	0.711998	0.228366	1.39818	-0.242344	1.64053	SLC35E1	-	-
chr1:116916107-116916154:mpeak_3869|chr1_116915794_116947037_ATP1A1_NM_+|	1213.11	2.27389	0.915462	2.48387	0.0129962	0.306112	19.1708	15.5059	8.9287	0	0.665389	2339.97	2988.21	1651.81	2210.41	2896.44	0.650818	0.141953	2.43871	0.241869	2.19685	ATP1A1	-	-
chr22:36916661-36916746:mpeak_47089|chr22_36907047_36925277_EIF3D_NM_-|	1319.84	1.71586	0.837714	2.04826	0.0405341	0.421144	22.5539	3.3227	5.95246	4.3109	1.99617	2389.59	2895.18	2698.45	2605.94	2571.06	0.489645	0.155668	1.66271	0.00943957	1.65327	EIF3D	-	-
chr14:21731580-21731637:mpeak_20936|chr14_21679465_21737638_HNRNPC_NM_-mpeak_20936|chr14_21679465_21737638_HNRNPC_NM_-||	1808.05	1.63158	0.744275	2.19218	0.0283666	0.38232	15.7877	18.8286	12.897	0	3.99233	3167.7	4043.72	3275.84	3762.33	3779.41	0.480021	0.156129	1.6203	-6.01193e-05	1.62036	HNRNPC	-	-
chr12:112911026-112911077:mpeak_18386|chr12_112856535_112943628_PTPN11_NM_+|	655.625	1.87161	0.871234	2.14823	0.0316954	0.39651	6.76617	5.53783	0	2.15545	1.99617	1410.75	1440.94	1431.57	1155.32	1101.22	0.431463	0.112568	2.15235	0.2139	1.93845	PTPN11	-	-
chr12:46660243-46660309:mpeak_15998|chr12_46582854_46663208_SLC38A1_NM_-|	1678.75	2.5912	0.889152	2.91424	0.0035656	0.193906	3.38309	12.1832	1.98415	3.23317	0	3475.56	2691.39	3809.58	3213.77	3576.47	0.252415	0.0492209	2.16201	-0.196449	2.35846	SLC38A1	-	-
chr3:161089217-161089273:mpeak_51459|chr3_161064143_161089871_SPTSSB_NM_-|	1738.86	1.66214	0.760935	2.18433	0.0289377	0.384338	6.76617	3.3227	4.96039	3.23317	2.66156	2266.67	1757.71	3803.62	4911.19	4628.45	0.250694	0.0813528	0.479353	-1.14431	1.62366	SPTSSB	-	-
chr3:63998411-63998463:mpeak_49406|chr3_63996440_64009686_PSMD6_NM_-|	1462.73	2.65655	0.937099	2.83487	0.00458443	0.217509	4.51078	8.86053	0.992077	3.23317	0	2618.51	2859.74	2496.07	3207.31	3428.08	0.24408	0.0462714	2.247	-0.152169	2.39916	PSMD6	-	-
chr12:46598306-46598356:mpeak_15996|chr12_46582854_46663208_SLC38A1_NM_-|	1678.3	2.57418	0.979515	2.62802	0.00858842	0.274295	2.25539	9.9681	3.96831	0	0	3475.56	2691.39	3809.58	3213.77	3576.47	0.19821	0.0374375	2.20802	-0.196449	2.40447	SLC38A1	-	-
chr17:8286240-8286417:mpeak_29892|chr17_8281010_8286565_RPL26_NM_-|	2611.12	1.72572	0.812655	2.12356	0.0337068	0.403051	5.63848	8.86053	5.95246	0	0	5729.82	6081.65	4657.8	5001.72	4619.8	0.122754	0.0416859	1.86936	0.311224	1.55813	RPL26	-	-
chr19:6417786-6417858:mpeak_35014|chr19_6414131_6424822_KHSRP_NM_-|	3993.59	2.25576	0.909435	2.4804	0.0131237	0.306112	10.1493	3.3227	0.992077	4.3109	0	6789.86	8629.05	8348.33	9129.4	7020.52	0.087373	0.0216463	1.93005	-0.0830159	2.01306	KHSRP	-	-
chr9:72372604-72372723:mpeak_71477|chr9_72333484_72374876_PTAR1_NM_-|	5.14404	-4.9227	2.22313	-2.21431	0.0268072	0.377416	0	0	0	4.3109	3.99233	5.63848	19.9362	6.94454	8.62179	1.99617	0	47.2782	-Inf	1.12718	-Inf	PTAR1	chr9:72372599:-;chr9:72372673:-	chr9_69757663_-;chr9_69757757_-
chr9:129104368-129104418:mpeak_72971|chr9_129089122_129265455_MVB12B_NM_+|	5.09253	-6.37558	2.03542	-3.13232	0.0017343	0.162271	0	0	3.96831	0	4.65772	11.277	22.1513	2.97623	3.23317	2.66156	0	97.239	-Inf	2.49887	-Inf	MVB12B	chr9:129104420:+	-
chr8:38291255-38291366:mpeak_68260|chr8_38271322_38326352_FGFR1_NM_-|	19.3086	-4.5647	1.81237	-2.51864	0.0117809	0.298449	0	0	0	9.69951	5.9885	30.4478	37.6573	41.6673	23.7099	43.9157	0	14.3541	-Inf	-0.0974032	-Inf	FGFR1	chr8:38291263:-;chr8:38291315:-	chr8_38433736_-
chr8:38105142-38105202:mpeak_68220|chr8_38089008_38118117_DDHD2_NM_+|	21.4069	-3.82712	1.75531	-2.18031	0.0292345	0.387027	1.1277	0	3.96831	0	5.32311	49.6186	75.3145	31.7465	32.3317	14.6386	0.902639	11.8036	-2.45756	1.25138	-3.70894	DDHD2	chr8:38105195:+	chr8_38247687_+
chr8:129007410-129007553:mpeak_70221|chr8_128902873_129113225_PVT1_NR_+|	12.1509	-4.57981	2.05873	-2.22458	0.0261094	0.371765	0	0	0	2.15545	7.98467	15.7877	37.6573	15.8732	10.7772	31.2733	0	17.506	-Inf	0.468862	-Inf	PVT1	chr8:129007478:+	chr8_127995216_+
chr8:110255713-110255917:mpeak_69800|chr8_110255530_110346350_NUDCD1_NM_-|	47.4255	-4.7262	1.83064	-2.58173	0.00983076	0.283126	0	0	0	3.23317	12.6424	89.088	90.8204	75.3979	87.2956	115.778	0	5.70097	-Inf	-0.0453032	-Inf	NUDCD1	chr8:110255710:-	chr8_109243484_-;chr8_109243632_-
chr8:110255583-110255658:mpeak_69799|chr8_110255530_110346350_NUDCD1_NM_-|	51.8182	-3.00657	0.899996	-3.34064	0.000835845	0.122351	2.25539	2.21513	12.897	20.4768	21.9578	89.088	90.8204	75.3979	87.2956	115.778	2.48489	19.8698	-3.04463	-0.0453032	-2.99932	NUDCD1	chr8:110255602:-	chr8_109243356_-
chr7:72304450-72304602:mpeak_65379|chr7_72299951_72307155_SBDSP1_NR_+|	80.7006	-1.51387	0.705263	-2.14653	0.0318304	0.396515	5.63848	8.86053	14.8812	14.0104	25.9502	199.602	114.079	131.946	147.648	144.389	4.62221	12.9349	-1.33436	0.150253	-1.48461	SBDSP1	chr7:72304586:+	chr7_72834005_+
chr7:64259829-64259900:mpeak_65235|chr7_64254765_64312176_ZNF138_NR_+mpeak_65235|chr7_64254765_64291828_ZNF138_NM_+||	4.94872	-5.05708	2.32168	-2.1782	0.0293911	0.387849	1.1277	3.3227	0	8.62179	11.977	9.02157	12.1832	0	3.23317	0	20.9877	637.108	-1.62559	3.29833	-4.92392	ZNF138	chr7:64259883:+	chr7_64799526_+
chr7:5528800-5528859:mpeak_64096|chr7_5521562_5553399_FBXL18_NM_-|	74.4595	-1.80546	0.878184	-2.0559	0.0397922	0.419972	2.25539	2.21513	10.9129	12.9327	7.98467	111.642	125.155	174.606	163.814	133.078	1.88792	6.75088	-2.24692	-0.408638	-1.83828	FBXL18	chr7:5528808:-	chr7_5489178_-
chr7:45701963-45702093:mpeak_65040|chr7_45613738_45753291_ADCY1_NM_+|	44.8126	-2.27829	1.15101	-1.97938	0.0477736	0.442809	1.1277	2.21513	1.98415	7.54407	3.32695	155.622	88.6053	80.3583	61.4303	45.9118	1.36874	6.84877	-1.35824	0.964755	-2.323	ADCY1	chr7:45702004:+;chr7:45702096:+	chr7_45662414_+;chr7_45662483_+
chr7:42260345-42260471:mpeak_64882|chr7_42006239_42276618_GLI3_NM_-|	10.1376	-5.02796	1.82686	-2.75224	0.00591886	0.244389	0	0	0.992077	9.69951	5.32311	13.5323	25.474	11.9049	20.4768	13.9732	0	34.5481	-Inf	0.335952	-Inf	GLI3	chr7:42260392:-	chr7_42220796_-
chr7:42023096-42023214:mpeak_64876|chr7_42006239_42276618_GLI3_NM_-|	9.23418	-3.98489	1.97732	-2.0153	0.0438737	0.434922	0	0	0.992077	0	5.9885	13.5323	25.474	11.9049	20.4768	13.9732	0	15.059	-Inf	0.335952	-Inf	GLI3	chr7:42023100:-	-
chr7:156755987-156756049:mpeak_67455|chr7_156742416_156762222_NOM1_NM_+|	37.195	-1.9297	0.981679	-1.96572	0.0493315	0.448409	12.4047	21.0438	23.8099	50.653	9.98084	49.6186	104.111	38.691	23.7099	37.9272	21.7579	84.1675	-0.75109	1.20063	-1.95172	NOM1	chr7:156756042:+	chr7_156963352_+
chr7:151801820-151801978:mpeak_67344|chr7_151722758_151818630_GALNT11_NM_+|	71.1176	-1.5726	0.786414	-1.99971	0.0455319	0.439655	9.02157	1.10757	8.9287	16.1659	11.977	139.834	158.382	96.2315	113.161	156.366	3.39657	10.1355	-1.28684	0.290428	-1.57727	GALNT11	chr7:151801869:+;chr7:151801966:+	chr7_152104782_+;chr7_152104880_+
chr7:105110771-105110906:mpeak_66342|chr7_105098373_105162685_PUS7_NM_-|	14.8973	-4.95191	1.63481	-3.02905	0.00245328	0.168315	0	0	3.96831	2.15545	4.65772	37.214	36.5497	22.8178	18.3213	23.2886	0	16.7342	-Inf	0.780191	-Inf	PUS7	chr7:105110769:-	-
chr6:99859997-99860111:mpeak_62363|chr6_99849506_99873207_PNISR_NM_-|	51.1341	-3.54132	1.66865	-2.12226	0.0338159	0.403051	1.1277	0	0	6.46634	9.98084	103.748	108.542	77.382	105.617	98.4776	0.531207	5.84318	-3.28143	0.177981	-3.45941	PNISR	chr6:99860003:-;chr6:99860032:-;chr6:99860058:-	chr6_99412072_-;chr6_99412127_-;chr6_99412159_-
chr6:75847120-75847170:mpeak_61886|chr6_75796273_75915623_COL12A1_NM_-|	4.96763	-5.34332	2.4194	-2.20853	0.0272073	0.377787	0	0	0	0	6.65389	10.1493	19.9362	3.96831	4.3109	4.65772	0	51.4333	-Inf	1.80253	-Inf	COL12A1	chr6:75847123:-	chr6_75137399_-
chr6:74332405-74332455:mpeak_61871|chr6_74304937_74363737_SLC17A5_NM_-|	26.0683	-4.02837	1.7994	-2.23873	0.0251736	0.370205	0	0	0	8.62179	1.33078	43.9801	60.9161	47.6197	54.9639	43.2503	0	6.82459	-Inf	0.1096	-Inf	SLC17A5	chr6:74332392:-	chr6_73622668_-
chr6:43559713-43559773:mpeak_61451|chr6_43543877_43581396_POLH_NM_+|	59.6985	-1.95156	0.942196	-2.07129	0.0383319	0.419399	4.51078	3.3227	6.94454	4.3109	17.9655	106.003	172.78	93.2553	75.4407	112.451	2.80988	10.3935	-1.31431	0.572786	-1.8871	POLH	chr6:43559764:+	chr6_43592026_+
chr6:41038764-41038937:mpeak_61285|chr6_41035176_41040188_OARD1_NM_-|	92.82	-1.42249	0.678379	-2.0969	0.0360023	0.412144	6.76617	15.5059	23.8099	18.3213	29.2771	180.431	198.254	100.2	157.348	198.286	5.88142	15.6654	-1.09589	0.317457	-1.41335	OARD1	chr6:41038780:-;chr6:41038871:-	chr6_41071042_-
chr6:32154746-32154804:mpeak_60930|chr6_32154251_32157963_PBX2_NM_-|	40.7097	-1.84624	0.814616	-2.2664	0.0234271	0.361951	4.51078	4.43027	5.95246	4.3109	5.9885	99.2372	152.844	43.6514	49.5753	36.5964	3.54689	12.5185	-0.277127	1.5423	-1.81943	PBX2	chr6:32154750:-	chr6_32186977_-
chr6:24666403-24666542:mpeak_60406|chr6_24651297_24667115_TDP2_NM_-|	16.1003	-4.20732	1.78808	-2.35298	0.0186237	0.338816	0	0	1.98415	3.23317	4.65772	40.597	24.3665	12.897	28.0208	45.2465	0	11.4607	-Inf	0.177502	-Inf	TDP2	chr6:24666407:-	chr6_24666191_-
chr6:170173017-170173072:mpeak_63823|chr6_170151717_170181425_ERMARD_NM_+|	9.25797	-3.6775	1.7313	-2.12413	0.0336594	0.403051	1.1277	0	0.992077	5.38862	5.32311	18.0431	25.474	13.8891	9.69951	12.6424	2.59138	32.3033	-2.79057	0.849323	-3.63989	ERMARD	chr6:170173070:+	chr6_169772974_+
chr6:160170300-160170456:mpeak_63674|chr6_160148029_160176059_WTAP_NM_+|	121.129	-1.86514	0.541007	-3.44754	0.000565715	0.0963625	110.514	108.542	226.194	272.664	195.624	49.6186	109.649	41.6673	49.5753	47.2426	137.539	501.485	-1.07968	0.786684	-1.86636	WTAP	chr6:160170356:+;chr6:160170451:+	chr6_159749303_+;chr6_159749318_+;chr6_159749367_+;chr6_159749386_+;chr6_159749423_+;chr6_159749463_+
chr6:13588686-13588744:mpeak_60191|chr6_13574760_13612021_SIRT5_NM_+|	39.9274	-2.64192	1.27637	-2.06988	0.0384638	0.419399	1.1277	1.10757	6.94454	0	5.32311	89.088	111.864	46.6276	64.6634	72.5274	1.11234	6.67379	-1.87138	0.713533	-2.58491	SIRT5	chr6:13588740:+	-
chr5:92877575-92877628:mpeak_57520|chr5_92747215_92917026_NR2F1-AS1_NR_-|	21.3821	-3.76266	1.67606	-2.24494	0.0247719	0.369865	0	0	3.96831	6.46634	1.33078	38.3417	29.9043	33.7306	44.1867	55.8927	0	8.79264	-Inf	-0.386408	-Inf	NR2F1-AS1	chr5:92877578:-	chr5_93541872_-
chr5:68498446-68498514:mpeak_56915|chr5_68485374_68505533_CENPH_NM_+|	62.3963	-2.69727	1.207	-2.23468	0.0254381	0.370205	0	2.21513	9.92077	17.2436	5.9885	101.493	81.9599	107.144	156.27	141.728	1.20747	8.18302	-3.31871	-0.558059	-2.76065	CENPH	chr5:68498498:+	chr5_69202669_+
chr5:64857220-64857334:mpeak_56795|chr5_64814460_64858995_CENPK_NM_-|	11.2934	-3.95446	1.73479	-2.2795	0.0226372	0.358919	0	0	3.96831	7.54407	5.9885	13.5323	12.1832	12.897	21.5545	35.2656	0	25.1027	-Inf	-0.853908	-Inf	CENPK	chr5:64857221:-	chr5_65561395_-
chr5:38932596-38932646:mpeak_56384|chr5_38845959_38932973_OSMR_NM_+|	16.3507	-4.28165	1.69574	-2.52495	0.0115715	0.295884	0	0	2.97623	2.15545	3.32695	33.8309	40.98	15.8732	29.0985	35.2656	0	10.542	-Inf	0.483935	-Inf	OSMR	chr5:38932647:+	chr5_38932547_+;chr5_38932586_+
chr5:34937421-34937718:mpeak_56260|chr5_34929697_34954657_DNAJC21_NM_+|	149.203	-0.664367	0.332308	-1.99925	0.0455812	0.439655	151.111	172.78	165.677	189.679	177.659	171.41	140.661	110.121	99.1506	113.782	103.788	164.993	-0.133703	0.535066	-0.668769	DNAJC21	chr5:34937555:+	chr5_34937436_+;chr5_34937471_+;chr5_34937544_+
chr5:171294782-171294832:mpeak_59415|chr5_171291105_171433877_FBXW11_NM_-|	27.1597	-4.43728	1.6526	-2.68503	0.00725231	0.258208	0	0	1.98415	7.54407	1.99617	54.1294	63.1313	36.7069	58.1971	47.908	0	8.06962	-Inf	0.300565	-Inf	FBXW11	chr5:171294778:-	chr5_171867778_-
chr5:1628798-1628879:mpeak_55884|chr5_1599942_1634120_LOC728613_NR_-|	57.7354	-1.64577	0.813852	-2.0222	0.0431561	0.432491	76.6833	109.649	91.2711	174.591	87.166	12.4047	11.0757	2.97623	7.54407	3.99233	793.568	2432.56	-0.336943	1.2791	-1.61605	LOC728613	chr5:1628813:-	chr5_1628699_-
chr5:153601940-153601999:mpeak_59156|chr5_153570294_153796373_GALNT10_NM_+|	89.6457	-2.74982	1.11256	-2.47161	0.0134504	0.308383	4.51078	0	4.96039	5.38862	21.9578	204.113	201.577	149.804	158.425	145.72	1.11188	7.11684	-2.25543	0.422809	-2.67824	GALNT10	chr5:153601993:+	chr5_154222436_+
chr5:145864909-145864961:mpeak_58978|chr5_145826872_145890003_TCERG1_NM_+|	22.6794	-4.50766	2.12433	-2.12192	0.0338443	0.403051	0	0	0	0	10.6462	45.1078	52.0556	40.6752	37.7203	40.5887	0	8.94759	-Inf	0.292678	-Inf	TCERG1	chr5:145864964:+	chr5_146485396_+
chr5:138620244-138620423:mpeak_58644|chr5_138609440_138665033_MATR3_NM_+|	117.472	-1.38067	0.545365	-2.53165	0.0113529	0.295823	10.1493	8.86053	17.8574	14.0104	24.6194	261.625	244.772	186.511	199.379	206.936	3.75393	9.52847	-0.986219	0.357626	-1.34384	MATR3	chr5:138620427:+	chr5_139284708_+;chr5_139284732_+;chr5_139284784_+
chr5:126234569-126234749:mpeak_58164|chr5_126206483_126366500_MARCH3_NM_-|	9.36846	-3.54164	1.7138	-2.06654	0.0387775	0.419814	0	1.10757	5.95246	2.15545	7.98467	12.4047	21.0438	12.897	16.1659	13.9732	3.31127	37.3933	-3.27597	0.221355	-3.49732	MARCH3	chr5:126234570:-	-
chr4:89185040-89185090:mpeak_54182|chr4_89183878_89205983_PPM1K_NM_-|	19.159	-3.64831	1.85358	-1.96825	0.0490389	0.448409	0	1.10757	0	1.07772	7.31928	45.1078	64.2388	16.8653	31.254	24.6194	1.01289	11.5441	-2.33752	1.17308	-3.5106	PPM1K	chr4:89185039:-	chr4_88263888_-
chr4:87622978-87623033:mpeak_54102|chr4_87515467_87735608_PTPN13_NM_+|	5.64142	-4.84672	2.4153	-2.00667	0.0447848	0.438659	0	0	0.992077	11.855	0	12.4047	8.86053	8.9287	5.38862	7.98467	0	57.6049	-Inf	0.516284	-Inf	PTPN13	chr4:87623034:+	chr4_86701894_+
chr4:6580483-6580615:mpeak_52768|chr4_6576900_6622914_MAN2B2_NM_+|	81.9041	-2.6618	0.877581	-3.03311	0.00242048	0.168315	1.1277	3.3227	12.897	6.46634	12.6424	181.559	181.641	151.788	118.55	149.047	1.22533	7.6316	-2.26136	0.377452	-2.63882	MAN2B2	chr4:6580535:+;chr4:6580600:+	chr4_6578806_+;chr4_6578872_+
chr4:54143501-54143565:mpeak_53527|chr4_53740228_54232242_SCFD2_NM_-|	36.7852	-4.10754	1.67875	-2.44679	0.0144135	0.313133	1.1277	0	5.95246	8.62179	15.3039	31.5755	98.5734	65.4771	78.6738	62.5466	0.866466	14.455	-4.14268	-0.0823957	-4.06029	SCFD2	chr4:54143511:-	chr4_53277346_-
chr4:40922355-40922523:mpeak_53345|chr4_40818276_41216635_APBB2_NM_-|	100.615	-1.50512	0.670303	-2.24544	0.02474	0.369865	7.89387	4.43027	16.8653	8.62179	14.6386	262.753	178.318	161.709	174.591	176.328	2.79414	7.82744	-1.11808	0.368062	-1.48614	APBB2	chr4:40922362:-;chr4:40922460:-	chr4_40920349_-;chr4_40920444_-
chr4:128808033-128808086:mpeak_54876|chr4_128802015_128819593_PLK4_NM_+|	9.72711	-4.37657	1.83283	-2.38787	0.0169462	0.330813	0	0	2.97623	0	4.65772	19.1708	26.5816	8.9287	18.3213	16.6347	0	17.3955	-Inf	0.645092	-Inf	PLK4	chr4:128808035:+;chr4:128808088:+	chr4_127886930_+
chr3:57904148-57904210:mpeak_49276|chr3_57742982_57913022_SLMAP_NM_+|	25.6241	-2.36107	1.16972	-2.0185	0.0435393	0.433276	5.63848	1.10757	25.794	16.1659	3.32695	38.3417	50.9481	39.6831	36.6426	38.5926	7.55523	39.4078	-2.16201	0.22092	-2.38293	SLMAP	chr3:57904209:+	chr3_57918475_+
chr3:5235890-5235946:mpeak_47730|chr3_5229358_5257513_EDEM1_NM_+|	52.3771	-3.54917	1.17328	-3.02499	0.00248638	0.168315	1.1277	1.10757	4.96039	14.0104	13.3078	108.259	109.649	89.287	77.5961	104.466	1.02578	11.8956	-3.2671	0.26853	-3.53563	EDEM1	chr3:5235941:+	chr3_5194259_+
chr3:47328778-47328956:mpeak_48827|chr3_47324329_47385044_KLHL18_NM_+|	44.8115	-1.78731	0.672578	-2.6574	0.00787454	0.266001	56.3848	47.6254	71.4296	71.1298	40.5887	50.7463	56.4859	23.8099	8.62179	21.2925	96.9953	340.905	-0.231324	1.58206	-1.81338	KLHL18	chr3:47328833:+;chr3:47328879:+;chr3:47328947:+	chr3_47287406_+;chr3_47287457_+
chr3:3213841-3213991:mpeak_47696|chr3_3192729_3221401_CRBN_NM_-|	103.362	-1.17854	0.494232	-2.38458	0.0170984	0.330813	46.2355	34.3346	47.6197	91.6065	63.8774	188.325	167.243	128.97	125.016	140.397	22.6596	51.4991	-0.748937	0.435489	-1.18443	CRBN	chr3:3213838:-;chr3:3213871:-;chr3:3213939:-	chr3_3172165_-
chr3:16323755-16323822:mpeak_48151|chr3_16306666_16344914_OXNAD1_NM_+|	25.3534	-4.09578	1.69796	-2.41218	0.0158572	0.327026	0	0	3.96831	7.54407	0.665389	56.3848	36.5497	46.6276	53.8862	47.908	0	8.20483	-Inf	-0.0904552	-Inf	OXNAD1	chr3:16323807:+	chr3_16282298_+
chr3:127381356-127381524:mpeak_50439|chr3_127348001_127391110_PODXL2_NM_+|	6.39376	-4.63037	1.80695	-2.56254	0.010391	0.29109	0	1.10757	5.95246	4.3109	3.99233	20.2985	12.1832	5.95246	2.15545	7.98467	3.40981	88.5855	-3.10111	1.5982	-4.69931	PODXL2	chr3:127381407:+;chr3:127381449:+;chr3:127381525:+	chr3_127662563_+;chr3_127662681_+
chr3:119623608-119623666:mpeak_50152|chr3_119545702_119813264_GSK3B_NM_-|	61.1731	-2.85648	1.17802	-2.42481	0.0153164	0.320707	0	2.21513	5.95246	5.38862	2.66156	168.027	158.382	92.2632	96.9951	79.8467	0.678638	5.20341	-2.07527	0.863472	-2.93874	GSK3B	chr3:119623609:-	-
chr3:118948516-118948584:mpeak_50113|chr3_118931528_118959752_B4GALT4_NM_-|	27.9977	-3.98936	1.687	-2.36476	0.0180417	0.335796	0	0	0	2.15545	6.65389	53.0017	55.3783	47.6197	59.2748	55.8927	0	5.41157	-Inf	-0.00192612	-Inf	B4GALT4	chr3:118948535:-	chr3_119229662_-
chr22:50248142-50248266:mpeak_47605|chr22_50247496_50276981_ZBED4_NM_+|	44.8105	-3.40315	0.905162	-3.75972	0.000170106	0.0581764	2.25539	6.6454	8.9287	14.0104	13.3078	130.813	159.49	57.5405	34.4872	20.6271	3.06604	32.1752	-1.44089	1.95061	-3.3915	ZBED4	chr22:50248200:+	chr22_49854550_+
chr22:46786424-46786476:mpeak_47579|chr22_46759084_46933067_CELSR1_NM_-|	14.2726	-7.0433	1.86158	-3.7835	0.00015464	0.0576946	0	0	9.92077	6.46634	5.32311	54.1294	32.1194	22.8178	8.62179	3.32695	0	62.4458	-Inf	1.89577	-Inf	CELSR1	chr22:46786425:-	chr22_46390529_-
chr22:31736659-31736718:mpeak_46963|chr22_31723295_31742249_PATZ1_NM_-|	30.4334	-1.74273	0.625457	-2.78632	0.00533096	0.237221	27.0647	32.1194	27.7782	44.1867	47.908	31.5755	46.5178	15.8732	14.0104	17.3001	75.7865	254.055	-0.433261	1.31187	-1.74513	PATZ1	chr22:31736665:-	chr22_31340681_-;chr22_31340711_-;chr22_31340733_-
chr21:45462402-45462459:mpeak_46177|chr21_45432205_45523173_TRAPPC10_NM_+|	56.7864	-1.46896	0.746947	-1.96662	0.0492275	0.448409	12.4047	1.10757	11.9049	18.3213	10.6462	119.536	127.37	93.2553	80.8293	92.4891	5.47262	15.3325	-1.0119	0.474389	-1.48629	TRAPPC10	chr21:45462453:+	chr21_44042571_+
chr21:40668349-40668466:mpeak_45977|chr21_40569341_40685712_BRWD1_NM_-|	89.436	-1.6598	0.580508	-2.85921	0.00424693	0.216531	25.937	39.8724	59.5246	127.171	109.789	112.77	106.326	102.184	119.627	91.1583	30.0368	94.7329	-1.58663	0.0705026	-1.65714	BRWD1	chr21:40668329:-;chr21:40668363:-;chr21:40668409:-	chr21_39296453_-;chr21_39296486_-
chr21:40192369-40192419:mpeak_45941|chr21_40177230_40194597_ETS2_NM_+|	18.9029	-3.55119	1.7558	-2.02254	0.0431201	0.432491	0	0	1.98415	0	6.65389	23.6816	36.5497	37.6989	39.8758	42.5849	0	7.18881	-Inf	-0.411404	-Inf	ETS2	chr21:40192420:+	chr21_38820495_+
chr20:57408848-57408916:mpeak_45238|chr20_57394310_57425958_GNAS-AS1_NR_-|	4.72561	-4.92115	2.05035	-2.40015	0.0163881	0.327504	0	0	2.97623	8.62179	5.9885	7.89387	4.43027	0.992077	9.69951	6.65389	0	101.39	-Inf	0.0918889	-Inf	GNAS-AS1	chr20:57408864:-	chr20_58833810_-
chr20:44482372-44482560:mpeak_44661|chr20_44470595_44486048_ACOT8_NM_-|	31.0682	-3.4644	1.11752	-3.10007	0.00193472	0.16249	2.25539	1.10757	5.95246	19.399	7.31928	69.9171	77.5296	34.7227	53.8862	38.5926	2.28079	25.6843	-2.69524	0.798041	-3.49328	ACOT8	chr20:44482374:-;chr20:44482466:-	chr20_45853736_-;chr20_45853827_-
chr20:44482053-44482193:mpeak_44660|chr20_44470595_44486048_ACOT8_NM_-|	39.7587	-1.56478	0.687133	-2.27726	0.0227707	0.358919	23.6816	11.0757	17.8574	37.7203	32.6041	69.9171	77.5296	34.7227	53.8862	38.5926	23.5728	69.3245	-0.758203	0.798041	-1.55624	ACOT8	chr20:44482059:-	chr20_45853419_-
chr2:9350054-9350104:mpeak_37893|chr2_9346893_9543381_ASAP2_NM_+|	24.0387	-3.58479	1.75953	-2.03735	0.0416149	0.425693	0	0	0	3.23317	8.65006	28.1924	35.4421	46.6276	60.3525	57.8889	0	7.20768	-Inf	-0.788476	-Inf	ASAP2	chr2:9350105:+	chr2_9209975_+
chr2:74000906-74000957:mpeak_39672|chr2_73989986_74007284_DUSP11_NM_-|	25.3022	-4.40949	1.99525	-2.20999	0.0271059	0.377787	0	0	8.9287	1.07772	0	37.214	78.6372	34.7227	39.8758	52.5657	0	7.8689	-Inf	0.450542	-Inf	DUSP11	chr2:74000910:-	chr2_73773784_-
chr2:63017912-63017966:mpeak_39299|chr2_62900985_63272544_EHBP1_NM_+|	15.0881	-4.52437	2.03347	-2.22495	0.0260843	0.371765	0	0	0	3.23317	4.65772	22.5539	54.2708	5.95246	26.9431	33.2695	0	11.9261	-Inf	0.800463	-Inf	EHBP1	chr2:63017963:+	chr2_62790827_+
chr2:55762947-55763055:mpeak_39141|chr2_55746730_55772042_CFAP36_NM_+|	25.8012	-4.72685	1.76355	-2.68031	0.00735546	0.258208	0	0	0	7.54407	6.65389	54.1294	50.9481	28.7702	47.4198	62.5466	0	10.2337	-Inf	0.184066	-Inf	CFAP36	chr2:55762995:+;chr2:55763051:+	chr2_55535863_+;chr2_55535931_+
chr2:55753401-55753451:mpeak_39137|chr2_55746730_55772042_CFAP36_NM_+|	25.1534	-3.93985	1.69711	-2.3215	0.0202597	0.345802	0	0	1.98415	1.07772	4.65772	54.1294	50.9481	28.7702	47.4198	62.5466	0	5.56421	-Inf	0.184066	-Inf	CFAP36	chr2:55753454:+	chr2_55526315_+
chr2:24461800-24461855:mpeak_38223|chr2_24426652_24583397_ITSN2_NM_-|	20.5963	-2.15266	0.706362	-3.04753	0.00230728	0.168315	22.5539	24.3665	31.7465	42.0312	37.2618	13.5323	17.7211	4.96039	6.46634	5.32311	150.129	662.929	-0.657824	1.48483	-2.14265	ITSN2	chr2:24461804:-	chr2_24238936_-
chr2:202342622-202342687:mpeak_42472|chr2_202316391_202344730_STRADB_NM_+|	49.8003	-2.23708	0.909722	-2.45908	0.0139293	0.311439	3.38309	22.1513	24.8019	22.6322	9.98084	116.153	166.135	36.7069	52.8085	43.2503	9.04553	43.2454	-0.584022	1.67325	-2.25727	STRADB	chr2:202342682:+	chr2_201477959_+
chr2:202317247-202317297:mpeak_42471|chr2_202316391_202344730_STRADB_NM_+|	42.6932	-2.55325	1.17427	-2.17433	0.0296806	0.388211	0	3.3227	0	3.23317	5.32311	116.153	166.135	36.7069	52.8085	43.2503	1.17706	6.44465	-0.779666	1.67325	-2.45291	STRADB	chr2:202317298:+	chr2_201452574_+
chr2:201368783-201368833:mpeak_42389|chr2_201355339_201374792_KCTD18_NM_-|	6.63447	-5.46466	1.92052	-2.84542	0.00443536	0.216531	0	0	2.97623	1.07772	6.65389	12.4047	22.1513	3.96831	6.46634	10.6462	0	50.7941	-Inf	1.29796	-Inf	KCTD18	chr2:201368782:-	chr2_200504056_-
chr2:162036116-162036253:mpeak_41539|chr2_161993465_162091852_TANK_NM_+|	13.7714	-1.87731	0.954133	-1.96756	0.049119	0.448409	7.89387	3.3227	20.8336	20.4768	10.6462	13.5323	19.9362	9.92077	11.855	19.2963	33.5138	126.501	-1.62671	0.289612	-1.91633	TANK	chr2:162036271:+	-
chr2:152117506-152117556:mpeak_41345|chr2_152108178_152118389_RBM43_NM_-|	3.75439	-5.10225	2.45226	-2.08063	0.0374676	0.416713	0	0	1.98415	2.15545	7.31928	3.38309	11.0757	2.97623	0	8.65006	0	98.5601	-Inf	0.899515	-Inf	RBM43	chr2:152117509:-	-
chr2:101552564-101552617:mpeak_40352|chr2_101436612_101611861_NPAS2_NM_+|	9.75118	-3.77955	1.78107	-2.12207	0.0338315	0.403051	0	0	1.98415	6.46634	4.65772	10.1493	15.5059	15.8732	12.9327	29.9425	0	22.3125	-Inf	-0.610337	-Inf	NPAS2	chr2:101552618:+	chr2_100936154_+
chr19:57706167-57706330:mpeak_37617|chr19_57702867_57722721_ZNF264_NM_+|	11.37	-3.16536	1.15274	-2.74593	0.00603395	0.244389	3.38309	8.86053	16.8653	20.4768	21.9578	14.66	13.2908	0.992077	3.23317	9.98084	43.8041	417.426	-1.69104	1.56135	-3.25238	ZNF264	chr19:57706224:+;chr19:57706315:+	chr19_57194855_+;chr19_57194962_+
chr19:50489552-50489610:mpeak_37186|chr19_50480041_50528805_VRK3_NM_-|	21.5074	-2.14287	0.868306	-2.46788	0.0135916	0.308901	2.25539	5.53783	12.897	16.1659	11.977	31.5755	44.3027	26.7861	40.9535	22.6232	10.2707	45.4168	-1.81177	0.332917	-2.14469	VRK3	chr19:50489556:-;chr19:50489604:-	chr19_49986302_-
chr19:22022827-22022888:mpeak_35961|chr19_21992609_22034870_ZNF43_NM_-|	5.32453	-4.2802	2.03122	-2.1072	0.0351	0.405496	1.1277	0	5.95246	7.54407	0.665389	14.66	8.86053	4.96039	2.15545	7.31928	4.79451	98.1074	-3.0656	1.2893	-4.35491	ZNF43	chr19:22022837:-	chr19_21840036_-
chr19:21274505-21274580:mpeak_35894|chr19_21264952_21307763_ZNF714_NR_+mpeak_35894|chr19_21264952_21299612_ZNF714_NM_+||	45.3082	-1.6573	0.742164	-2.23307	0.0255446	0.370703	5.63848	4.43027	10.9129	9.69951	17.3001	94.7264	87.4977	84.3266	56.0416	82.5082	5.52547	17.0105	-1.32783	0.294433	-1.62226	ZNF714	chr19:21274564:+	chr19_21091771_+
chr19:16968363-16968420:mpeak_35660|chr19_16940197_16989307_SIN3B_NM_+|	23.8485	-5.71075	1.99579	-2.8614	0.00421781	0.216531	0	0	8.9287	10.7772	0	48.4909	67.5615	17.8574	40.9535	43.9157	0	19.1829	-Inf	0.76093	-Inf	SIN3B	chr19:16968418:+	-
chr19:16942831-16942892:mpeak_35654|chr19_16940197_16989307_SIN3B_NM_+|	24.1129	-3.34468	1.35015	-2.47726	0.0132395	0.306112	0	2.21513	10.9129	3.23317	5.9885	48.4909	67.5615	17.8574	40.9535	43.9157	1.90873	19.6001	-2.59924	0.76093	-3.36017	SIN3B	chr19:16942889:+	chr19_16832077_+
chr18:77794881-77795062:mpeak_34561|chr18_77794345_77805773_RBFA_NM_+|	57.2216	-4.75312	1.77908	-2.67168	0.00754733	0.262493	0	1.10757	0	14.0104	14.6386	152.239	124.047	84.3266	92.6842	89.1621	0.400876	10.7633	-4.10806	0.638763	-4.74682	RBFA	chr18:77795063:+	chr18_80034962_+;chr18_80035062_+
chr18:677526-677586:mpeak_33407|chr18_674406_712662_ENOSF1_NM_-|	27.4088	-3.85325	1.60095	-2.40685	0.0160908	0.327504	0	0	4.96039	4.3109	1.99617	50.7463	43.1951	61.5088	52.8085	54.5619	0	6.6719	-Inf	-0.261196	-Inf	ENOSF1	chr18:677518:-	chr18_677516_-;chr18_677536_-
chr18:29992607-29993044:mpeak_33982|chr18_29848731_30050447_GAREM_NM_-|	118.99	-1.50701	0.574474	-2.62328	0.00870879	0.27572	119.536	70.8842	332.346	181.058	182.317	68.7894	64.2388	56.5484	54.9639	59.2196	143.142	407.493	-1.28436	0.224962	-1.50932	GAREM	chr18:29992953:-	-
chr18:2582794-2582855:mpeak_33435|chr18_2571509_2616435_NDC80_NM_+|	7.09719	-4.12982	2.01434	-2.05022	0.0403433	0.420384	1.1277	0	7.93662	28.0208	17.3001	2.25539	2.21513	0.992077	6.46634	4.65772	25.2251	439.559	-4.97657	-0.853452	-4.12312	NDC80	chr18:2582850:+	chr18_2582845_+
chr17:78295208-78295280:mpeak_33157|chr17_78234659_78367144_RNF213_NM_+|	59.9139	-1.28155	0.646488	-1.98232	0.0474432	0.442013	10.1493	4.43027	12.897	23.7099	23.954	87.9603	104.111	103.176	119.627	109.124	7.59068	18.2452	-1.46948	-0.204261	-1.26522	RNF213	chr17:78295263:+	chr17_80321460_+
chr17:78076476-78076536:mpeak_33133|chr17_78075354_78093070_GAA_NM_+|	74.4954	-1.79257	0.812166	-2.20714	0.0273041	0.377787	9.02157	3.3227	31.7465	14.0104	9.98084	142.09	153.952	136.907	108.85	135.074	4.16978	14.6358	-1.58985	0.221611	-1.81146	GAA	chr17:78076532:+	-
chr17:74413488-74413544:mpeak_32986|chr17_74387694_74449288_UBE2O_NM_-|	58.0897	-3.33014	1.57818	-2.11011	0.0348486	0.405496	1.1277	1.10757	0	5.38862	18.6309	89.088	173.888	89.287	95.9174	106.462	0.849987	8.23526	-2.84073	0.435573	-3.2763	UBE2O	chr17:74413491:-	chr17_76417412_-
chr17:57161203-57161260:mpeak_32035|chr17_57060282_57184266_TRIM37_NM_-|	56.27	-1.78648	0.793903	-2.25025	0.0244333	0.368118	7.89387	3.3227	6.94454	10.7772	21.9578	127.43	120.725	79.3662	85.1402	99.143	4.52	15.0501	-1.2378	0.49758	-1.73538	TRIM37	chr17:57161201:-	chr17_59083844_-
chr17:5266211-5266314:mpeak_29652|chr17_5185557_5286888_RABEP1_NM_+|	36.7494	-3.8933	1.69072	-2.30274	0.0212934	0.350047	0	1.10757	2.97623	2.15545	11.3116	96.9818	73.0994	40.6752	64.6634	74.5236	0.651199	9.14216	-3.30707	0.504294	-3.81137	RABEP1	chr17:5266241:+;chr17:5266315:+	chr17_5362948_+
chr17:17587577-17587633:mpeak_30137|chr17_17584786_17713283_RAI1_NM_+|	22.5517	-3.83312	1.61495	-2.37353	0.017619	0.333219	0	0	2.97623	3.23317	5.32311	37.214	33.227	50.5959	37.7203	55.2273	0	8.03416	-Inf	-0.44204	-Inf	RAI1	chr17:17587620:+	chr17_17684304_+
chr16:9205860-9205996:mpeak_26770|chr16_9185536_9210524_C16orf72_NM_+|	102.227	-1.33177	0.569949	-2.33665	0.0194571	0.342568	59.7679	73.0994	101.192	137.949	169.009	86.8326	129.585	60.5167	113.161	91.1583	61.3939	154.114	-1.03415	0.293682	-1.32783	C16orf72	chr16:9205889:+;chr16:9205915:+;chr16:9205958:+;chr16:9206000:+	chr16_9112031_+;chr16_9112122_+
chr16:9200561-9200698:mpeak_26765|chr16_9185536_9210524_C16orf72_NM_+|	67.5102	-1.69324	0.584823	-2.89531	0.00378789	0.20189	19.1708	19.9362	44.6435	58.1971	51.9004	86.8326	129.585	60.5167	113.161	91.1583	18.0701	58.429	-1.39939	0.293682	-1.69308	C16orf72	chr16:9200621:+;chr16:9200706:+	chr16_9106716_+;chr16_9106761_+
chr16:78155479-78155538:mpeak_28770|chr16_78133309_78312499_WWOX_NR_+mpeak_28770|chr16_78133309_79245504_WWOX_NM_+||	22.5484	-1.71115	0.830124	-2.06132	0.0392727	0.419814	4.51078	4.43027	10.9129	12.9327	19.9617	30.4478	37.6573	30.7544	45.2644	28.6117	13.1283	41.8685	-1.70769	-0.0345079	-1.67318	WWOX	chr16:78155530:+	chr16_78121632_+
chr16:67943940-67943997:mpeak_28261|chr16_67927174_67961227_PSKH1_NM_+|	79.938	-3.36576	0.894271	-3.7637	0.00016742	0.0581764	2.25539	4.43027	7.93662	12.9327	3.32695	281.924	294.613	82.3424	51.7307	57.8889	1.15962	12.6047	-1.27068	2.17155	-3.44223	PSKH1	chr16:67943992:+;chr16:67944020:+	chr16_67910088_+
chr16:4805682-4805732:mpeak_26679|chr16_4803059_4817219_ZNF500_NM_-|	4.58975	-4.31038	2.12915	-2.02446	0.0429227	0.432491	0	0	0.992077	0	5.9885	9.02157	11.0757	5.95246	7.54407	5.32311	0	37.092	-Inf	0.67972	-Inf	ZNF500	chr16:4805681:-	chr16_4755684_-
chr16:4031547-4031662:mpeak_26628|chr16_4016967_4166186_ADCY9_NM_-|	24.8046	-2.76827	1.27591	-2.16965	0.0300334	0.388211	2.25539	0	3.96831	11.855	3.99233	55.2571	45.4102	42.6593	33.4094	49.2388	2.24044	15.8136	-2.55022	0.269084	-2.81931	ADCY9	chr16:4031544:-	chr16_3981544_-
chr16:31135229-31135390:mpeak_27712|chr16_31128984_31142066_KAT8_NM_+|	35.3507	-1.81775	0.726742	-2.50123	0.0123764	0.30409	5.63848	9.9681	37.6989	38.7981	40.5887	24.8093	45.4102	54.5643	61.4303	34.6002	22.2254	77.7489	-2.32238	-0.515765	-1.80661	KAT8	chr16:31135335:+;chr16:31135385:+	chr16_31123938_+;chr16_31124009_+
chr16:27650910-27650962:mpeak_27389|chr16_27561467_27789894_KIAA0556_NM_+|	8.15022	-4.95201	1.80704	-2.74039	0.00613658	0.244721	0	0	4.96039	2.15545	5.9885	9.02157	24.3665	8.9287	10.7772	15.3039	0	37.4304	-Inf	0.516531	-Inf	KIAA0556	chr16:27650961:+	chr16_27639639_+
chr16:1462625-1462734:mpeak_26311|chr16_1416396_1464721_UNKL_NM_-|	38.7554	-3.94346	1.09579	-3.59872	0.000319785	0.0752264	4.51078	0	8.9287	10.7772	22.6232	104.876	104.111	63.493	40.9535	27.281	2.1584	32.1339	-2.64524	1.25082	-3.89606	UNKL	chr16:1462684:-	chr16_1412678_-
chr16:1402427-1402525:mpeak_26301|chr16_1401899_1412997_GNPTG_NM_+|	31.2835	-2.74821	1.11979	-2.45423	0.0141188	0.312431	2.25539	1.10757	3.96831	5.38862	2.66156	120.663	76.4221	29.7623	28.0208	42.5849	1.70634	11.9744	-1.25249	1.55848	-2.81097	GNPTG	chr16:1402500:+	chr16_1352498_+;chr16_1352559_+
chr16:11890059-11890153:mpeak_26853|chr16_11845362_11891114_ZC3H7A_NM_-|	49.9123	-2.4502	1.22223	-2.0047	0.0449955	0.439615	1.1277	1.10757	1.98415	5.38862	7.98467	101.493	106.326	67.4613	107.772	98.4776	1.07558	5.61082	-2.19546	0.187635	-2.38309	ZC3H7A	chr16:11890091:-	chr16_11796186_-
chr15:66786365-66786722:mpeak_25213|chr15_66783055_66790146_SNAPC5_NM_-|	52.8253	-2.33712	1.05643	-2.21228	0.026947	0.377745	84.5772	109.649	75.3979	133.638	93.8199	16.9154	6.6454	6.94454	0	0.665389	824.361	3979.74	-0.055929	2.2154	-2.27133	SNAPC5	chr15:66786363:-;chr15:66786413:-;chr15:66786481:-;chr15:66786548:-;chr15:66786573:-;chr15:66786611:-;chr15:66786660:-	chr15_66494027_-;chr15_66494077_-;chr15_66494146_-;chr15_66494238_-;chr15_66494293_-
chr15:55581040-55581098:mpeak_24756|chr15_55497903_55582013_RAB27A_NM_-|	75.5599	-2.6112	1.1489	-2.27279	0.023039	0.360199	2.25539	0	13.8891	5.38862	10.6462	121.791	103.004	148.812	182.135	167.678	1.00331	6.00129	-3.14489	-0.564384	-2.5805	RAB27A	chr15:55581047:-	chr15_55288850_-
chr15:52495479-52495613:mpeak_24674|chr15_52486251_52587995_MYO5C_NM_-|	65.5383	-2.17977	1.10451	-1.97352	0.0484362	0.446664	0	3.3227	2.97623	8.62179	5.9885	133.068	161.705	71.4296	141.182	127.089	1.12721	5.17706	-1.81908	0.380302	-2.19938	MYO5C	chr15:52495481:-	chr15_52203285_-
chr15:45893599-45893677:mpeak_24401|chr15_45879416_45898592_BLOC1S6_NM_+|	104.799	-1.97208	0.645702	-3.05416	0.00225691	0.168315	16.9154	11.0757	12.897	22.6322	13.9732	290.945	379.895	134.923	86.2179	78.5159	4.17254	16.5197	-0.237567	1.74762	-1.98519	BLOC1S6	chr15:45893654:+	chr15_45601474_+
chr15:32928329-32928388:mpeak_23876|chr15_32907344_32928457_ARHGAP11A_NM_+|	30.6699	-4.78785	1.17642	-4.06984	4.70459e-05	0.0297041	1.1277	1.10757	15.8732	18.3213	15.3039	65.4063	76.4221	25.794	47.4198	39.9233	1.57603	43.7509	-3.88391	0.911036	-4.79494	ARHGAP11A	chr15:32928382:+	chr15_32636150_+;chr15_32636180_+
chr14:92504996-92505050:mpeak_23135|chr14_92436237_92506403_TRIP11_NM_-|	15.3604	-5.06061	2.0127	-2.51434	0.0119254	0.300253	0	0	0	3.23317	12.6424	25.937	36.5497	23.8099	16.1659	35.2656	0	21.0995	-Inf	0.316986	-Inf	TRIP11	chr14:92504996:-	chr14_92038643_-
chr14:89670306-89670357:mpeak_23021|chr14_89629313_90085494_FOXN3_NM_-|	31.6373	-4.49615	1.67394	-2.68597	0.00723185	0.258208	1.1277	0	6.94454	12.9327	5.32311	72.1725	74.2069	35.7148	78.6738	29.2771	0.770392	17.541	-3.89703	0.61196	-4.50899	FOXN3	chr14:89670306:-	-
chr14:58988940-58988995:mpeak_22040|chr14_58894102_59014498_KIAA0586_NM_+|	6.69137	-4.11439	1.82765	-2.25119	0.0243734	0.368118	0	0	1.98415	3.23317	4.65772	6.76617	16.6135	9.92077	15.0881	8.65006	0	29.3385	-Inf	0.0592262	-Inf	KIAA0586	chr14:58988991:+	chr14_58522272_+
chr14:51388804-51388859:mpeak_21719|chr14_51372274_51411248_PYGL_NM_-|	45.2317	-2.39981	1.04216	-2.30272	0.0212946	0.350047	2.25539	1.10757	8.9287	6.46634	8.65006	72.1725	107.434	63.493	78.6738	103.135	1.8724	9.80224	-2.25298	0.135242	-2.38822	PYGL	chr14:51388802:-	chr14_50922086_-
chr14:104163423-104163500:mpeak_23616|chr14_104095524_104167537_KLC1_NM_+|	79.1216	-1.76908	0.801957	-2.20595	0.0273874	0.377787	12.4047	17.7211	43.6514	165.969	73.8582	60.8956	66.454	115.081	112.083	123.097	23.6559	80.9336	-2.64921	-0.874675	-1.77454	KLC1	chr14:104163489:+	chr14_103697151_+
chr13:48545741-48545797:mpeak_20055|chr13_48517580_48575462_SUCLA2_NM_-|	27.3538	-1.71059	0.851572	-2.00874	0.0445647	0.438659	3.38309	4.43027	22.8178	8.62179	11.3116	47.3632	36.5497	45.6356	44.1867	49.2388	9.31126	30.7428	-1.86699	-0.143791	-1.7232	SUCLA2	chr13:48545745:-	chr13_47971611_-
chr13:34073460-34073511:mpeak_19684|chr13_33679847_34250972_STARD13_NM_-|	8.05924	-4.87203	2.48144	-1.96339	0.0496009	0.450359	0	0	0	0	11.977	22.5539	11.0757	12.897	10.7772	11.3116	0	34.2338	-Inf	0.527921	-Inf	STARD13	chr13:34073463:-	chr13_33499325_-
chr13:28228346-28228406:mpeak_19537|chr13_28194879_28239822_POLR1D_NM_+|	120.271	-1.44133	0.632925	-2.27725	0.0227714	0.358919	6.76617	4.43027	9.92077	17.2436	11.977	230.05	276.892	212.305	215.545	217.582	2.20863	6.06437	-1.22069	0.236518	-1.45721	POLR1D	chr13:28228398:+	chr13_27654259_+
chr13:28225312-28225512:mpeak_19535|chr13_28194879_28239822_POLR1D_NM_+|	121.467	-6.89958	1.50397	-4.58758	4.48423e-06	0.0087316	0	0	14.8812	24.7876	22.6232	230.05	276.892	212.305	215.545	217.582	0	9.65122	-Inf	0.236518	-Inf	POLR1D	chr13:28225515:+	chr13_27651288_+;chr13_27651375_+
chr13:28224337-28224406:mpeak_19533|chr13_28194879_28239822_POLR1D_NM_+|	123.264	-1.59635	0.730691	-2.18471	0.0289101	0.384338	1.1277	15.5059	15.8732	20.4768	27.281	230.05	276.892	212.305	215.545	217.582	3.28117	9.85867	-1.35066	0.236518	-1.58718	POLR1D	chr13:28224392:+	chr13_27650201_+;chr13_27650254_+;chr13_27650308_+
chr13:111314281-111314345:mpeak_20715|chr13_111293955_111358527_CARS2_NM_-|	29.8727	-4.72282	1.67656	-2.81697	0.00484795	0.223791	0	0	3.96831	3.23317	7.98467	48.4909	66.454	77.382	59.2748	31.9387	0	9.00745	-Inf	0.0323386	-Inf	CARS2	chr13:111314294:-	chr13_110661948_-
chr12:56307516-56307668:mpeak_16642|chr12_56296139_56321697_WIBG_NM_-|	46.0036	-1.23413	0.598047	-2.0636	0.039056	0.419814	18.0431	8.86053	15.8732	20.4768	24.6194	90.2157	98.5734	56.5484	54.9639	71.862	14.2506	33.2486	-0.59532	0.626946	-1.22227	WIBG	chr12:56307530:-;chr12:56307610:-	chr12_55913726_-;chr12_55913810_-;chr12_55913873_-
chr12:42755453-42755507:mpeak_15877|chr12_42719946_42840393_PPHLN1_NM_+|	12.634	-4.4167	1.97256	-2.23907	0.0251516	0.370205	0	0	0	10.7772	3.32695	20.2985	23.2589	32.7386	22.6322	13.3078	0	20.5365	-Inf	-0.0719785	-Inf	PPHLN1	chr12:42755505:+	chr12_42361701_+
chr12:12351822-12351889:mpeak_15242|chr12_12274354_12419811_LRP6_NM_-|	38.6052	-1.63806	0.668349	-2.4509	0.0142498	0.312733	24.8093	31.0119	37.6989	40.9535	73.1928	38.3417	56.4859	34.7227	21.5545	27.281	58.866	181.724	-0.858755	0.767488	-1.62624	LRP6	chr12:12351826:-	-
chr12:122248849-122248908:mpeak_18779|chr12_122242637_122267971_SETD1B_NM_+|	53.0688	-3.0945	1.19025	-2.59987	0.00932596	0.278041	1.1277	3.3227	2.97623	16.1659	11.977	65.4063	207.115	61.5088	81.907	79.1813	1.63304	13.98	-2.22083	0.876896	-3.09773	SETD1B	chr12:122248907:+	chr12_121810995_+
chr12:102295838-102295897:mpeak_17928|chr12_102271104_102314993_DRAM1_NM_+|	262.607	-1.2769	0.545666	-2.34008	0.0192796	0.342033	16.9154	6.6454	19.8415	31.254	19.2963	605.573	536.062	486.118	424.623	479.746	2.06378	5.06239	-0.994055	0.300474	-1.29453	DRAM1	chr12:102295891:+	chr12_101902110_+
chr11:75126308-75126359:mpeak_13527|chr11_75110534_75132770_RPS3_NM_+|	7.03301	-4.40809	1.99255	-2.21228	0.0269472	0.377745	0	0	6.94454	3.23317	1.33078	7.89387	17.7211	18.8495	9.69951	4.65772	0	34.6571	-Inf	0.210473	-Inf	RPS3	chr11:75126360:+	chr11_75415314_+
chr11:69482374-69482450:mpeak_13275|chr11_69482355_69490165_ORAOV1_NM_-|	121.496	-2.01558	0.900268	-2.23886	0.0251649	0.370205	4.51078	2.21513	10.9129	9.69951	14.6386	182.687	323.409	136.907	279.13	250.852	1.32898	5.28588	-1.8049	0.186927	-1.99182	ORAOV1	chr11:69482377:-	chr11_69667607_-
chr11:68142826-68142899:mpeak_13195|chr11_68080076_68216276_LRP5_NM_+|	58.8722	-1.40908	0.654978	-2.15134	0.0314494	0.395309	25.937	16.6135	32.7386	52.8085	49.2388	106.003	81.9599	82.3424	45.2644	95.816	22.6377	60.3277	-1.07846	0.335637	-1.4141	LRP5	chr11:68142891:+	chr11_68375422_+
chr11:18370015-18370169:mpeak_11807|chr11_18343815_18387329_GTF2H1_NM_+|	87.2511	-6.28579	1.61564	-3.89059	0.000100001	0.0482829	0	0	5.95246	20.4768	9.98084	230.05	165.027	102.184	155.192	183.647	0	8.25581	-Inf	0.426242	-Inf	GTF2H1	chr11:18370074:+;chr11:18370170:+	chr11_18348526_+;chr11_18348622_+
chr10:93578017-93578096:mpeak_9927|chr10_93558150_93622693_TNKS2_NM_+|	74.2723	-3.00652	1.24122	-2.42222	0.0154258	0.322176	1.1277	2.21513	0.992077	7.54407	13.9732	175.921	208.222	86.3107	84.0625	162.355	0.870204	6.76508	-2.16642	0.792262	-2.95868	TNKS2	chr10:93578084:+	chr10_91818339_+
chr10:43622861-43622992:mpeak_8758|chr10_43572516_43623559_RET_NM_+|	237.011	-1.08007	0.462359	-2.33601	0.0194907	0.342568	438.674	499.512	369.053	356.727	488.396	54.1294	80.8523	21.8257	32.3317	28.6117	695.047	1466.94	0.212932	1.29056	-1.07763	RET	chr10:43622916:+;chr10:43622952:+;chr10:43622988:+	chr10_43127464_+;chr10_43127504_+
chr10:27456810-27456866:mpeak_8438|chr10_27443752_27475307_MASTL_NM_+|	5.45411	-5.08732	2.27221	-2.23893	0.0251604	0.370205	0	1.10757	7.93662	0	11.3116	19.1708	3.3227	2.97623	5.38862	3.32695	4.92393	164.63	-3.5343	1.52898	-5.06327	MASTL	chr10:27456866:+	-
chr10:134540765-134540856:mpeak_11186|chr10_134351352_134595540_INPP5A_NM_+|	198.558	-2.91126	0.639584	-4.5518	5.31896e-06	0.0087316	14.66	8.86053	5.95246	17.2436	16.6347	705.937	859.471	137.899	99.1506	119.77	1.50252	11.1627	-0.174998	2.71824	-2.89323	INPP5A	chr10:134540818:+;chr10:134540853:+	-
chr10:11996898-11996966:mpeak_8018|chr10_11963306_12085169_UPF2_NM_-|	26.4728	-4.04046	1.87518	-2.1547	0.0311853	0.393193	1.1277	0	3.96831	0	14.6386	63.151	55.3783	53.5722	40.9535	31.9387	0.951407	14.7131	-3.45942	0.491475	-3.9509	UPF2	chr10:11996896:-	-
chr10:112349645-112349695:mpeak_10589|chr10_112327448_112363988_SMC3_NM_+|	17.0457	-3.92377	1.8851	-2.08146	0.0373916	0.416713	0	0	7.93662	0	1.33078	21.4262	44.3027	26.7861	33.4094	35.2656	0	9.70803	-Inf	0.046576	-Inf	SMC3	chr10:112349649:+	-
chr10:102745997-102746108:mpeak_10336|chr10_102739129_102747276_MRPL43_NM_-|	332.434	-2.06125	0.679375	-3.03404	0.00241303	0.168315	411.609	390.971	855.171	979.651	653.412	11.277	7.75296	7.93662	3.23317	3.32695	4217.46	17164.1	-1.04744	0.977504	-2.02495	MRPL43	chr10:102745995:-;chr10:102746033:-	chr10_100986277_-;chr10_100986346_-
chr1:78142606-78142713:mpeak_2694|chr1_78031469_78149112_ZZZ3_NM_-|	19.6093	-3.4626	1.69982	-2.03704	0.0416461	0.425693	0	0	0	3.23317	4.65772	25.937	39.8724	35.7148	47.4198	39.258	0	6.4472	-Inf	-0.310188	-Inf	ZZZ3	chr1:78142605:-;chr1:78142661:-	chr1_77676921_-;chr1_77676978_-
chr1:247050864-247050914:mpeak_7680|chr1_247004300_247094726_AHCTF1_NM_-|	10.1292	-4.2828	1.89229	-2.26329	0.0236177	0.361951	0	0	0.992077	7.54407	1.99617	11.277	28.7967	10.9129	20.4768	19.2963	0	20.7796	-Inf	0.246033	-Inf	AHCTF1	chr1:247050861:-	chr1_246887544_-
chr1:211572438-211572495:mpeak_6699|chr1_211556096_211605660_LINC00467_NR_+|	21.0977	-2.90894	1.0165	-2.86171	0.00421357	0.216531	9.02157	1.10757	8.9287	8.62179	10.6462	54.1294	70.8842	19.8415	20.4768	7.31928	8.10242	59.1901	-0.892054	1.97688	-2.86893	LINC00467	chr1:211572489:+	chr1_211399152_+
chr1:120539214-120539422:mpeak_4042|chr1_120459317_120612317_NOTCH2_NM_-|	104.142	-1.19981	0.372483	-3.22111	0.00127695	0.145572	57.5125	53.1632	69.4454	57.1194	59.885	201.858	228.159	104.168	96.9951	113.116	25.7376	59.3261	-0.167487	1.03731	-1.20479	NOTCH2	chr1:120539214:-	-
chr1:116207338-116207403:mpeak_3854|chr1_116184573_116233739_VANGL1_NM_+|	113.054	-2.32795	0.785596	-2.96329	0.0030437	0.183696	4.51078	5.53783	9.92077	14.0104	4.65772	351.841	356.636	143.851	90.5288	149.047	1.41834	7.45615	-0.923496	1.47073	-2.39423	VANGL1	chr1:116207390:+	chr1_115664768_+
chr1:113149296-113149358:mpeak_3634|chr1_113068733_113162040_ST7L_NM_-|	40.3389	-6.09359	1.42149	-4.28676	1.81302e-05	0.0212295	66.534	44.3027	90.279	116.394	72.5274	3.38309	9.9681	0	0	0	830.164	#DIV/0!	-0.747904	Inf	-Inf	ST7L	chr1:113149302:-	chr1_112606681_-
chr1:113096914-113096968:mpeak_3629|chr1_113068733_113162040_ST7L_NM_-|	2.61385	-8.11855	2.59243	-3.13164	0.00173832	0.162271	0	1.10757	4.96039	5.38862	1.33078	3.38309	9.9681	0	0	0	8.29564	#DIV/0!	-2.81359	Inf	-Inf	ST7L	chr1:113096915:-	chr1_112554295_-
chrX:133529318-133529375:mpeak_75567|chrX_133507341_133559230_PHF6_NM_+|	17.5221	-4.09679	2.06023	-1.98851	0.046755	0.441473	0	0	0	2.15545	8.65006	33.8309	28.7967	11.9049	59.2748	30.6079	0	10.6157	-Inf	-0.115729	-Inf	PHF6	-	chrX_134395356_+
chr9:129246247-129246295:mpeak_72973|chr9_129089122_129265455_MVB12B_NM_+|	5.92126	-3.39051	1.34251	-2.5255	0.0115534	0.295884	2.25539	2.21513	1.98415	6.46634	3.99233	11.277	22.1513	2.97623	3.23317	2.66156	13.3735	140.265	-0.891837	2.49887	-3.39071	MVB12B	-	chr9_126484023_+
chr8:95541291-95541509:mpeak_69314|chr8_95501088_95565746_KIAA1429_NM_-|	126.897	-0.810473	0.361844	-2.23984	0.0251011	0.370205	143.217	134.016	161.709	135.793	158.363	122.919	153.952	77.382	85.1402	96.4814	100.131	176.007	-0.132544	0.681202	-0.813746	KIAA1429	-	chr8_94529079_-;chr8_94529107_-;chr8_94529180_-;chr8_94529231_-
chr8:123966374-123966424:mpeak_69995|chr8_123793900_123985481_ZHX2_NM_+|	13.8512	-4.01452	1.72474	-2.32761	0.0199329	0.344105	0	0	3.96831	2.15545	3.99233	19.1708	31.0119	15.8732	37.7203	24.6194	0	12.934	-Inf	-0.0552557	-Inf	ZHX2	-	chr8_122954186_+
chr6:7606315-7606512:mpeak_60077|chr6_7590431_7609057_SNRNP48_NM_+mpeak_60077|chr6_7590431_7609057_SNRNP48_NM_+||	66.4406	-1.08071	0.465492	-2.32165	0.0202516	0.345802	62.0233	63.1313	97.2236	101.306	131.747	46.2355	46.5178	46.6276	32.3317	37.2618	134.933	284.18	-0.815002	0.259561	-1.07456	SNRNP48	-	chr6_7606178_+
chr6:47547174-47547232:mpeak_61542|chr6_47445524_47591921_CD2AP_NM_+|	50.1379	-4.71967	1.71374	-2.75402	0.00588686	0.244389	0	0	6.94454	0	10.6462	71.0448	107.434	91.2711	91.6065	122.432	0	5.76162	-Inf	-0.189556	-Inf	CD2AP	-	chr6_47579488_+
chr6:157258292-157258347:mpeak_63563|chr6_157099063_157527300_ARID1B_NM_+|	44.8757	-2.34891	1.10056	-2.13429	0.0328194	0.397781	4.51078	0	16.8653	6.46634	3.99233	108.259	84.175	77.382	59.2748	87.8314	2.34407	12.1717	-2.01376	0.362685	-2.37644	ARID1B	-	chr6_156937215_+
chr6:119569418-119569487:mpeak_62789|chr6_119501110_119670931_MAN1A1_NM_-|	102.81	-2.19549	0.863135	-2.54362	0.010971	0.292288	5.63848	0	9.92077	9.69951	5.32311	243.582	270.246	128.97	181.058	173.667	1.09735	5.15685	-1.56032	0.672154	-2.23247	MAN1A1	-	chr6_119248266_-
chr5:141314622-141314676:mpeak_58881|chr5_141303384_141318085_KIAA0141_NM_+|	39.6651	-4.14348	1.74388	-2.37602	0.0175006	0.333219	0	0	9.92077	0	3.32695	59.7679	76.4221	71.4296	64.6634	111.12	0	5.35883	-Inf	-0.275172	-Inf	KIAA0141	-	chr5_141935111_+
chr3:157920866-157921043:mpeak_51315|chr3_157827840_158261971_RSRC1_NM_+|	195.879	-1.00808	0.477575	-2.11083	0.0347869	0.405496	340.564	237.019	453.379	410.613	370.622	40.597	31.0119	22.8178	21.5545	30.6079	806.58	1646.59	-0.510997	0.518593	-1.02959	RSRC1	-	chr3_158203191_+
chr3:142282285-142282335:mpeak_50955|chr3_142168444_142297668_ATR_NM_-|	18.488	-3.9357	1.79037	-2.19827	0.02793	0.379552	0	0	0	6.46634	2.66156	34.9586	37.6573	26.7861	51.7307	24.6194	0	8.85033	-Inf	0.0787671	-Inf	ATR	-	chr3_142563406_-
chr22:50820518-50820579:mpeak_47640|chr22_50781745_50882627_PPP6R2_NM_+|	21.2534	-4.04761	1.68084	-2.40809	0.016036	0.327504	0	0	1.98415	0	5.32311	42.8524	49.8405	35.7148	35.5649	41.2541	0	6.4934	-Inf	0.305135	-Inf	PPP6R2	-	chr22_50382138_+
chr22:41537045-41537096:mpeak_47324|chr22_41488613_41572776_EP300_NM_+|	10.8483	-3.74133	1.89944	-1.96971	0.0488718	0.448409	0	0	6.94454	3.23317	0	19.1708	16.6135	18.8495	23.7099	19.9617	0	16.2789	-Inf	-0.220052	-Inf	EP300	-	chr22_41141074_+
chr18:52593173-52593256:mpeak_34283|chr18_52571646_52626739_CCDC68_NM_-|	13.0525	-4.07379	1.763	-2.31072	0.0208486	0.349949	0	0	6.94454	0	3.32695	19.1708	28.7967	25.794	25.8654	20.6271	0	14.2094	-Inf	-0.00670388	-Inf	CCDC68	-	chr18_54925942_-
chr18:51686185-51686290:mpeak_34263|chr18_51681681_51751158_MBD2_NM_-|	142.839	-2.08146	0.815301	-2.55299	0.0106801	0.291119	6.76617	1.10757	6.94454	19.399	13.9732	280.796	343.346	195.439	270.509	290.11	1.26153	5.3325	-1.7713	0.30834	-2.07964	MBD2	-	chr18_54159818_-
chr17:2295717-2295858:mpeak_29455|chr17_2290943_2304258_MNT_NM_-|	10.5945	-2.76731	1.40746	-1.96617	0.0492786	0.448409	0	3.3227	8.9287	4.3109	14.6386	15.7877	17.7211	13.8891	5.38862	21.9578	9.9159	67.6071	-2.48374	0.285614	-2.76936	MNT	-	chr17_2392502_-
chr16:89452568-89452618:mpeak_29163|chr16_89353521_89556969_ANKRD11_NR_-mpeak_29163|chr16_89335071_89556969_ANKRD11_NM_-||	17.6926	-5.61655	1.73065	-3.24535	0.00117308	0.145572	0	0	2.97623	8.62179	2.66156	33.8309	63.1313	13.8891	25.8654	25.9502	0	21.7025	-Inf	1.14639	-Inf	ANKRD11	-	chr16_89386160_-
chr16:46858290-46858397:mpeak_27825|chr16_46836982_46865074_C16orf87_NM_-|	48.2956	-3.4582	1.57087	-2.20145	0.027704	0.379552	0	1.10757	5.95246	4.3109	3.32695	121.791	104.111	73.4137	71.1298	97.8122	0.490285	5.60759	-3.03215	0.483536	-3.51569	C16orf87	-	chr16_46824386_-
chr15:66797676-66797741:mpeak_25221|chr15_66797420_66840688_ZWILCH_NM_+|	400.663	-0.742547	0.374154	-1.9846	0.0471887	0.441685	233.433	159.49	440.482	314.695	339.348	477.015	468.501	518.856	506.53	548.281	41.5564	69.5526	-0.893027	-0.149995	-0.743033	ZWILCH	-	chr15_66505390_+
chr13:20401363-20401420:mpeak_19278|chr13_20399375_20437776_ZMYM5_NM_-|	9.759	-4.49596	1.92063	-2.34087	0.0192386	0.342033	0	0	1.98415	0	7.31928	18.0431	24.3665	11.9049	14.0104	19.9617	0	20.2791	-Inf	0.471582	-Inf	ZMYM5	-	chr13_19827230_-
chr12:32975382-32975471:mpeak_15796|chr12_32945426_33049780_PKP2_NM_-|	24.3794	-4.13919	1.67965	-2.46431	0.0137276	0.309878	0	0	4.96039	0	5.9885	38.3417	50.9481	48.6118	37.7203	57.2235	0	7.62693	-Inf	-0.100081	-Inf	PKP2	-	chr12_32822483_-
chr11:9769545-9769609:mpeak_11568|chr11_9685623_9771410_SWAP70_NM_+|	52.6265	-2.45084	1.18685	-2.06499	0.0389241	0.419814	3.38309	0	2.97623	19.399	6.65389	87.9603	106.326	90.279	94.8397	114.447	1.74129	9.69041	-2.51613	-0.0397231	-2.4764	SWAP70	-	chr11_9748053_+
chr11:95546627-95546747:mpeak_13942|chr11_95523624_95564189_CEP57_NM_+|	21.3709	-5.18723	1.66926	-3.1075	0.00188677	0.16249	0	0	5.95246	0	6.65389	57.5125	48.7329	29.7623	34.4872	30.6079	0	13.2898	-Inf	0.748531	-Inf	CEP57	-	chr11_95813504_+
chr1:154143881-154143932:mpeak_4852|chr1_154130197_154155725_TPM3_NR_-mpeak_4852|chr1_154131524_154164611_TPM3_NM_-||	34.7692	-2.61688	1.28158	-2.04192	0.0411596	0.424953	2.25539	1.10757	11.9049	25.8654	7.31928	50.7463	44.3027	26.7861	77.5961	99.8084	3.53813	22.0821	-3.16003	-0.518211	-2.64182	TPM3	-	chr1_154171426_-
chr1:151509195-151509320:mpeak_4708|chr1_151483861_151509680_CGN_NM_+|	69.3338	-3.67374	1.26179	-2.91152	0.00359676	0.193906	1.1277	1.10757	12.897	1.07772	9.98084	149.984	208.222	115.081	106.695	87.166	0.624016	7.75408	-2.83688	0.798418	-3.6353	CGN	-	chr1_151536775_+
chr11:107274969-107275040:mpeak_14063|chr11_107197779_107328572_CWF19L2_NM_-|	8.85075	-5.94758	1.54482	-3.85002	0.000118106	0.0510218	7.89387	17.7211	13.8891	12.9327	19.2963	9.02157	7.75296	0	0	0	152.701	#DIV/0!	-0.263384	Inf	-Inf	CWF19L2	-	-
chr1:113156531-113156581:mpeak_3636|chr1_113068733_113162040_ST7L_NM_-|	2.19772	-9.17168	3.32033	-2.76228	0.00573988	0.244389	0	0	3.96831	0	4.65772	3.38309	9.9681	0	0	0	0	#DIV/0!	-Inf	Inf	-Inf	ST7L	-	-
chr19:4532222-4532272:mpeak_34884|chr19_4524097_4535208_PLIN5_NM_-|	12.7019	-2.27652	1.13726	-2.00175	0.0453112	0.439615	25.937	16.6135	25.794	18.3213	10.6462	7.89387	15.5059	0	4.3109	1.99617	181.841	868.257	0.220975	2.47642	-2.25544	PLIN5	-	-
chr9:3501737-3501787:mpeak_70712|chr9_3225280_3526001_RFX3_NM_-|	4.44939	-4.38531	1.8626	-2.3544	0.0185527	0.338816	3.38309	1.10757	7.93662	3.23317	3.32695	2.25539	19.9362	1.98415	0	1.33078	20.2358	437.316	-1.10577	3.32792	-4.43369	RFX3	-	-
chr15:57022975-57023079:mpeak_24840|chr15_56924320_57026284_ZNF280D_NM_-|	7.54412	-3.03093	1.18706	-2.55331	0.0106704	0.291119	5.63848	1.10757	16.8653	14.0104	13.9732	5.63848	7.75296	2.97623	2.15545	5.32311	50.3758	428.979	-2.148	0.942109	-3.09011	ZNF280D	-	-
chr15:66064165-66064394:mpeak_25180|chr15_65954325_66084631_DENND4A_NM_-|	5.43453	-3.64687	1.65548	-2.2029	0.0276017	0.378854	2.25539	1.10757	10.9129	3.23317	2.66156	5.63848	18.8286	0.992077	5.38862	3.32695	13.7448	173.138	-1.73635	1.91861	-3.65496	DENND4A	-	-
chr12:83099063-83099192:mpeak_17496|chr12_83080933_83525988_TMTC2_NM_+|	4.16067	-4.50149	2.18305	-2.06202	0.0392056	0.419814	0	0	0.992077	9.69951	5.9885	7.89387	1.10757	4.96039	4.3109	6.65389	0	104.74	-Inf	-0.238119	-Inf	TMTC2	-	-
chr8:27632076-27632130:mpeak_68000|chr8_27632057_27660822_ESCO2_NM_+|	3.35244	-4.49961	2.05656	-2.18793	0.0286745	0.384245	0	0	2.97623	2.15545	7.31928	5.63848	3.3227	3.96831	2.15545	5.9885	0	102.796	-Inf	0.150255	-Inf	ESCO2	-	-
chr6:56864993-56865139:mpeak_61702|chr6_56819772_56890879_BEND6_NM_+|	2.72468	-5.17399	2.52066	-2.05263	0.0401084	0.419972	0	0	0.992077	0	5.9885	5.63848	7.75296	2.97623	3.23317	0.665389	0	101.539	-Inf	1.54689	-Inf	BEND6	-	-
chr10:11543048-11543183:mpeak_7997|chr10_11505848_11653788_USP6NL_NM_-|	8.08414	-4.05469	1.50195	-2.69961	0.00694201	0.257828	0	2.21513	8.9287	5.38862	3.99233	16.9154	23.2589	4.96039	11.855	3.32695	5.5138	90.9015	-2.46218	1.58101	-4.04319	USP6NL	-	-
chr8:145841007-145841057:mpeak_70605|chr8_145756000_145911197_ARHGAP39_NM_-|	6.38925	-4.7903	2.4125	-1.98562	0.0470759	0.441685	1.1277	0	0.992077	3.23317	7.31928	24.8093	12.1832	12.897	0	1.33078	3.04844	81.1407	-2.7708	1.96349	-4.73428	ARHGAP39	-	-
chr8:145864102-145864152:mpeak_70606|chr8_145756000_145911197_ARHGAP39_NM_-|	6.30357	-4.61778	2.34713	-1.96742	0.049135	0.448409	1.1277	0	3.96831	5.38862	1.33078	24.8093	12.1832	12.897	0	1.33078	3.04844	75.1186	-2.65954	1.96349	-4.62303	ARHGAP39	-	-
chr8:145866687-145866737:mpeak_70607|chr8_145756000_145911197_ARHGAP39_NM_-|	5.96173	-5.78772	2.88294	-2.00757	0.0446887	0.438659	0	0	0	1.07772	7.31928	24.8093	12.1832	12.897	0	1.33078	0	59.0184	-Inf	1.96349	-Inf	ARHGAP39	-	-
chr10:126186656-126186701:mpeak_10986|chr10_126150340_126301832_LHPP_NM_+|	4.10905	-4.34702	1.90936	-2.27669	0.022805	0.358919	0	0	1.98415	2.15545	5.32311	7.89387	6.6454	3.96831	6.46634	6.65389	0	55.3746	-Inf	0.351888	-Inf	LHPP	-	-
chr6:144854349-144854399:mpeak_63260|chr6_144612872_145172124_UTRN_NM_+|	7.84314	-4.85347	1.82833	-2.6546	0.00794032	0.266017	0	0	2.97623	6.46634	9.98084	10.1493	12.1832	10.9129	6.46634	19.2963	0	52.9602	-Inf	-0.130709	-Inf	UTRN	-	-
chr19:53157458-53157586:mpeak_37347|chr19_53118050_53193834_ZNF83_NM_-|	12.9475	-3.07192	1.28926	-2.38271	0.0171859	0.330813	3.38309	0	6.94454	8.62179	5.32311	39.4693	21.0438	9.92077	24.7876	9.98084	5.59067	46.7438	-2.0414	1.02228	-3.06368	ZNF83	-	-
chr11:113195323-113195411:mpeak_14234|chr11_113185250_113236946_TTC12_NM_+|	14.938	-3.50693	1.38732	-2.52785	0.0114764	0.295884	1.1277	1.10757	14.8812	2.15545	11.977	32.7032	22.1513	21.8257	16.1659	25.2848	4.07489	45.8522	-3.11325	0.378906	-3.49216	TTC12	-	-
chr1:3750535-3750695:mpeak_201|chr1_3732081_3773797_CEP104_NM_-|	10.6546	-5.45364	1.79568	-3.03709	0.00238874	0.168315	0	0	2.97623	10.7772	5.32311	27.0647	15.5059	21.8257	15.0881	7.98467	0	42.4882	-Inf	0.508153	-Inf	CEP104	-	-
chr3:64060122-64060172:mpeak_49424|chr3_64053639_64082598_PRICKLE2-AS1_NR_+|	5.52683	-4.43886	1.89152	-2.34671	0.0189399	0.33943	0	0	1.98415	3.23317	4.65772	9.02157	12.1832	13.8891	4.3109	5.9885	0	40.8254	-Inf	0.395033	-Inf	PRICKLE2-AS1	-	-
chr12:111012600-111012650:mpeak_18273|chr12_110974900_111021064_PPTC7_NM_-|	5.34532	-4.38417	2.00468	-2.18696	0.0287452	0.384245	0	0	1.98415	1.07772	5.32311	6.76617	15.5059	10.9129	3.23317	8.65006	0	36.7826	-Inf	0.551414	-Inf	PPTC7	-	-
chr1:173791159-173791217:mpeak_5660|chr1_173769657_173793777_CENPL_NM_-|	6.32422	-4.36692	1.96878	-2.21808	0.0265493	0.375718	0	0	0.992077	3.23317	6.65389	6.76617	15.5059	7.93662	16.1659	5.9885	0	36.1542	-Inf	0.150869	-Inf	CENPL	-	-
chr11:82958980-82959034:mpeak_13710|chr11_82904780_82966886_ANKRD42_NM_+|	5.96896	-4.22478	2.00421	-2.10795	0.035035	0.405496	0	0	6.94454	0	2.66156	12.4047	9.9681	7.93662	6.46634	13.3078	0	34.6656	-Inf	0.27626	-Inf	ANKRD42	-	-
chr12:39750629-39750708:mpeak_15839|chr12_39688319_39837192_KIF21A_NM_-|	23.0361	-2.22257	0.984824	-2.25682	0.0240193	0.365093	2.25539	5.53783	8.9287	16.1659	3.99233	55.2571	54.2708	19.8415	30.1763	33.9348	7.11529	34.6468	-1.31511	0.968612	-2.28373	KIF21A	-	-
chr18:12429396-12429446:mpeak_33644|chr18_12407894_12431148_SLMO1_NM_+|	8.58068	-3.80394	1.85365	-2.05214	0.0401561	0.419972	0	1.10757	2.97623	0	7.31928	20.2985	23.2589	10.9129	8.62179	11.3116	2.54277	33.3769	-2.63159	1.08279	-3.71437	SLMO1	-	-
chr15:63933467-63933517:mpeak_25045|chr15_63901465_64126147_HERC1_NM_-|	9.01325	-4.71702	2.04846	-2.30271	0.021295	0.350047	0	0	9.92077	0	3.99233	10.1493	23.2589	12.897	8.62179	21.2925	0	32.4987	-Inf	0.227173	-Inf	HERC1	-	-
chr19:12400340-12400390:mpeak_35369|chr19_12384878_12405714_ZNF44_NM_-|	5.45789	-4.1606	2.05814	-2.02153	0.0432252	0.432491	0	0	2.97623	0	4.65772	9.02157	13.2908	3.96831	14.0104	6.65389	0	30.9913	-Inf	0.442236	-Inf	ZNF44	-	-
chr13:79216249-79216323:mpeak_20426|chr13_79191257_79233314_RNF219_NM_-|	11.821	-3.52174	1.76365	-1.99684	0.0458425	0.440449	1.1277	0	1.98415	5.38862	10.6462	14.66	25.474	20.8336	24.7876	13.3078	2.80982	30.5774	-3.41311	0.0308108	-3.44392	RNF219	-	-
chr21:43428850-43428901:mpeak_46059|chr21_43414217_43430496_ZBTB21_NM_-|	9.7873	-4.13456	1.99918	-2.06813	0.038628	0.419399	0	0	0	8.62179	7.98467	12.4047	12.1832	14.8812	11.855	29.9425	0	29.2993	-Inf	-0.619895	-Inf	ZBTB21	-	-
chr13:100774506-100774565:mpeak_20635|chr13_100741268_101182351_PCCA_NM_+|	9.73682	-4.64951	1.83881	-2.52853	0.011454	0.295884	0	0	0.992077	6.46634	6.65389	24.8093	9.9681	21.8257	14.0104	12.6424	0	29.1105	-Inf	0.105767	-Inf	PCCA	-	-
chr15:74309772-74309826:mpeak_25446|chr15_74287013_74336561_PML_NM_+|	9.64108	-4.73149	1.78098	-2.65667	0.00789161	0.266001	0	0	3.96831	3.23317	5.32311	16.9154	22.1513	10.9129	8.62179	25.2848	0	27.9446	-Inf	0.38678	-Inf	PML	-	-
chr5:111312225-111312292:mpeak_57857|chr5_111066743_111312628_NREP_NM_-mpeak_57857|chr5_111066743_111312628_NREP_NM_-||	12.5549	-5.2424	1.74918	-2.99707	0.00272591	0.17291	0	0	2.97623	6.46634	3.99233	22.5539	37.6573	11.9049	28.0208	11.977	0	25.8848	-Inf	0.799183	-Inf	NREP	-	-
chr3:63897802-63897863:mpeak_49382|chr3_63850232_63985125_ATXN7_NM_+|	35.4916	-1.88323	0.906892	-2.07658	0.0378404	0.418591	5.63848	4.43027	6.94454	11.855	18.6309	75.5556	76.4221	55.5563	28.0208	71.862	6.62515	24.0804	-1.30936	0.552472	-1.86184	ATXN7	-	-
chr5:100181883-100181933:mpeak_57711|chr5_100147833_100238989_ST8SIA4_NM_-|	7.73902	-4.11884	2.06612	-1.99351	0.0462054	0.441196	0	0	5.95246	0	2.66156	6.76617	24.3665	15.8732	6.46634	15.3039	0	22.8831	-Inf	0.310988	-Inf	ST8SIA4	-	-
chr3:20178503-20178556:mpeak_48204|chr3_20081523_20193823_KAT2B_NM_+|	8.35349	-4.34289	2.07527	-2.09268	0.0363773	0.41339	0	0	5.95246	0	2.66156	23.6816	13.2908	4.96039	9.69951	23.2886	0	22.6992	-Inf	0.547368	-Inf	KAT2B	-	-
chr2:48124081-48124222:mpeak_39027|chr2_48035386_48132932_FBXO11_NM_-|	10.5598	-3.64115	1.83515	-1.98412	0.0472427	0.441685	0	0	4.96039	2.15545	7.98467	18.0431	4.43027	17.8574	21.5545	28.6117	0	22.1989	-Inf	-1.01285	-Inf	FBXO11	-	-
chr2:171939284-171939360:mpeak_41729|chr2_171850466_172087824_TLK1_NM_-|	45.2302	-1.2701	0.644613	-1.97033	0.0488011	0.448409	7.89387	9.9681	16.8653	11.855	11.3116	107.131	98.5734	73.4137	47.4198	67.8697	8.68331	21.2142	-0.579296	0.709416	-1.28871	TLK1	-	-
chr4:84519838-84519887:mpeak_54059|chr4_84457066_84525820_AGPAT9_NM_+|	19.43	-3.76933	1.8319	-2.0576	0.0396285	0.419972	1.1277	0	14.8812	2.15545	1.99617	48.4909	29.9043	39.6831	24.7876	31.2733	1.43848	19.8788	-3.49207	0.296545	-3.78862	AGPAT9	-	-
chr9:95418786-95418906:mpeak_71904|chr9_95378339_95432547_IPPK_NM_-|	12.8454	-4.18577	2.06921	-2.02288	0.0430856	0.432491	0	0	8.9287	5.38862	0	16.9154	23.2589	12.897	20.4768	40.5887	0	19.3575	-Inf	-0.295557	-Inf	IPPK	-	-
chr6:151256731-151256886:mpeak_63409|chr6_151186814_151422661_MTHFD1L_NM_+|	43.4196	-1.91425	0.77099	-2.48285	0.0130336	0.306112	4.51078	5.53783	10.9129	14.0104	9.98084	78.9387	125.155	46.6276	64.6634	73.8582	4.92353	18.8519	-1.21144	0.725505	-1.93694	MTHFD1L	-	-
chr17:44246129-44246179:mpeak_31466|chr17_44109069_44302740_KANSL1_NM_-|	11.7219	-4.93661	2.14203	-2.30464	0.0211867	0.350047	0	0	0	0	7.31928	28.1924	38.7648	12.897	19.399	10.6462	0	17.0445	-Inf	1.2258	-Inf	KANSL1	-	-
chr14:23768355-23768405:mpeak_21071|chr14_23768126_23772057_PPP1R3E_NM_-|	13.0781	-4.39953	1.83524	-2.39725	0.0165188	0.327504	0	0	4.96039	0	5.9885	34.9586	16.6135	15.8732	29.0985	23.2886	0	16.0399	-Inf	0.180503	-Inf	PPP1R3E	-	-
chr1:90484255-90484349:mpeak_2951|chr1_90460677_90492912_ZNF326_NM_+|	85.2091	-1.55944	0.787929	-1.97916	0.0477983	0.442809	11.277	7.75296	11.9049	36.6426	14.6386	184.942	179.426	156.748	156.27	92.4891	5.22272	15.582	-1.14638	0.43063	-1.57701	ZNF326	-	-
chr10:95228178-95228231:mpeak_10010|chr10_95066758_95242074_MYOF_NM_-|	22.7659	-2.71268	1.34751	-2.0131	0.0441042	0.436679	1.1277	1.10757	11.9049	2.15545	3.32695	49.6186	46.5178	25.794	44.1867	41.9195	2.32509	15.5382	-2.37456	0.365904	-2.74046	MYOF	-	-
chr19:1494025-1494076:mpeak_34699|chr19_1491164_1497172_REEP6_NM_+|	20.6624	-3.4141	1.58283	-2.15696	0.0310085	0.392169	1.1277	0	6.94454	5.38862	4.65772	43.9801	34.3346	35.7148	39.8758	34.6002	1.43995	15.4195	-3.32835	0.0923135	-3.42066	REEP6	-	-
chr13:42619399-42619528:mpeak_19868|chr13_42614171_42803234_DGKH_NM_+|	16.1603	-4.02677	1.93048	-2.08589	0.0369888	0.414759	0	0	7.93662	0	7.98467	18.0431	24.3665	51.588	15.0881	36.5964	0	15.4168	-Inf	-0.699032	-Inf	DGKH	-	-
chr16:89427937-89427987:mpeak_29161|chr16_89353521_89556969_ANKRD11_NR_-mpeak_29161|chr16_89335071_89556969_ANKRD11_NM_-||	17.3711	-3.61419	1.76042	-2.05303	0.0400694	0.419972	0	1.10757	4.96039	4.3109	0.665389	33.8309	63.1313	13.8891	25.8654	25.9502	1.14227	15.1232	-2.58041	1.14639	-3.7268	ANKRD11	-	-
chr9:101900138-101900335:mpeak_72157|chr9_101867370_101911461_TGFBR1_NM_+|	63.8855	-4.95365	1.54928	-3.19739	0.00138679	0.153138	0	0	29.7623	18.3213	23.2886	42.8524	43.1951	165.677	117.472	198.286	0	14.8249	-Inf	-1.89917	-Inf	TGFBR1	-	-
chr8:128957234-128957284:mpeak_70218|chr8_128902873_129113225_PVT1_NR_+|	11.9513	-4.27134	1.99846	-2.13732	0.0325718	0.397781	0	0	0	2.15545	5.9885	15.7877	37.6573	15.8732	10.7772	31.2733	0	14.0598	-Inf	0.468862	-Inf	PVT1	-	-
chr12:112107473-112107627:mpeak_18308|chr12_112082366_112123800_BRAP_NM_-|	27.7482	-3.88715	1.5819	-2.45727	0.0139998	0.311439	1.1277	0	7.93662	6.46634	4.65772	56.3848	64.2388	53.5722	48.4976	34.6002	0.934888	13.9465	-3.49419	0.404779	-3.89897	BRAP	-	-
chr13:28227423-28227558:mpeak_19536|chr13_28194879_28239822_POLR1D_NM_+|	126.141	-1.4122	0.555663	-2.54147	0.0110386	0.292288	13.5323	11.0757	39.6831	24.7876	19.9617	230.05	276.892	212.305	215.545	217.582	4.85421	13.0815	-1.19371	0.236518	-1.43022	POLR1D	-	-
chr2:164589014-164589064:mpeak_41588|chr2_164468316_164592513_FIGN_NM_-|	17.8819	-5.17689	2.02844	-2.55216	0.0107058	0.291119	0	0	0	0	7.31928	57.5125	53.1632	26.7861	19.399	14.6386	0	12.0336	-Inf	1.4486	-Inf	FIGN	-	-
chr8:61653806-61653863:mpeak_68647|chr8_61591323_61777574_CHD7_NM_+|	33.1428	-2.81493	1.19834	-2.34902	0.0188231	0.338816	1.1277	1.10757	5.95246	8.62179	5.9885	50.7463	84.175	59.5246	54.9639	59.2196	1.65671	11.8375	-2.61656	0.220415	-2.83697	CHD7	-	-
chr6:136732749-136732820:mpeak_63059|chr6_136665376_136871957_MAP7_NM_-|	111.153	-1.16338	0.54595	-2.13093	0.0330951	0.399477	9.02157	11.0757	29.7623	18.3213	25.9502	181.559	201.577	187.503	242.488	204.274	5.24545	11.6724	-1.29623	-0.142266	-1.15396	MAP7	-	-
chr6:18180423-18180477:mpeak_60300|chr6_18155618_18222139_KDM1B_NM_+|	13.7194	-3.98521	1.81257	-2.19865	0.0279029	0.379552	0	0	2.97623	0	5.9885	23.6816	27.6892	19.8415	37.7203	19.2963	0	11.664	-Inf	0.00371159	-Inf	KDM1B	-	-
chr3:119720889-119721051:mpeak_50155|chr3_119545702_119813264_GSK3B_NM_-|	63.5885	-1.87589	0.720928	-2.60205	0.00926689	0.278041	6.76617	3.3227	4.96039	14.0104	11.3116	168.027	158.382	92.2632	96.9951	79.8467	3.09087	11.253	-1.00075	0.863472	-1.86422	GSK3B	-	-
chr13:52991185-52991237:mpeak_20241|chr13_52990058_53024813_VPS36_NM_-|	37.0254	-3.23091	1.59412	-2.02677	0.0426859	0.431789	0	1.10757	12.897	6.46634	5.9885	55.2571	46.5178	57.5405	101.306	83.1736	1.08825	10.4751	-3.93166	-0.664783	-3.26688	VPS36	-	-
chr17:8397041-8397089:mpeak_29906|chr17_8379266_8534079_MYH10_NM_-|	40.684	-2.29439	1.15619	-1.98445	0.0472055	0.441685	3.38309	0	6.94454	7.54407	7.31928	64.2787	99.681	44.6435	113.161	59.885	2.06337	10.0179	-2.10348	0.176031	-2.27951	MYH10	-	-
chr1:217617050-217617100:mpeak_6853|chr1_217604707_217804444_GPATCH2_NM_-|	17.9755	-4.0966	1.9162	-2.13787	0.0325269	0.397781	0	0	1.98415	0	7.98467	42.8524	24.3665	24.8019	25.8654	51.9004	0	9.71927	-Inf	-0.0246746	-Inf	GPATCH2	-	-
chr13:94286879-94286959:mpeak_20480|chr13_93879077_95055268_GPC6_NM_+|	34.1623	-3.84532	1.80173	-2.13424	0.0328231	0.397781	1.1277	0	9.92077	0	3.99233	65.4063	109.649	37.6989	36.6426	77.1851	0.644194	9.18195	-3.04003	0.793202	-3.83323	GPC6	-	-
chr10:95103608-95103684:mpeak_10000|chr10_95066758_95242074_MYOF_NM_-|	21.7981	-4.4227	1.69167	-2.6144	0.00893847	0.27572	0	0	5.95246	0	3.99233	49.6186	46.5178	25.794	44.1867	41.9195	0	8.8872	-Inf	0.365904	-Inf	MYOF	-	-
chr17:2222178-2222231:mpeak_29426|chr17_2207236_2226948_SRR_NM_+|	19.2461	-3.9537	1.74717	-2.26291	0.0236412	0.361951	0	0	2.97623	0	7.31928	33.8309	32.1194	29.7623	39.8758	46.5772	0	8.859	-Inf	-0.232387	-Inf	SRR	-	-
chr14:96912891-96912951:mpeak_23299|chr14_96858447_96954641_AK7_NM_+|	25.775	-4.44622	1.80217	-2.46715	0.0136193	0.308901	0	0	4.96039	0	7.98467	28.1924	68.6691	39.6831	60.3525	47.908	0	8.74999	-Inf	-0.0260899	-Inf	AK7	-	-
chrX:69712402-69712452:mpeak_74706|chrX_69664704_69722012_DLG3_NM_+|	46.8448	-2.95934	1.25886	-2.3508	0.0187329	0.338816	1.1277	1.10757	6.94454	6.46634	6.65389	99.2372	107.434	52.5801	125.016	61.8812	1.08155	8.37857	-2.58119	0.372411	-2.9536	DLG3	-	-
chr7:6742080-6742138:mpeak_64192|chr7_6732334_6746566_ZNF12_NM_-|	21.0928	-4.08484	1.69789	-2.40583	0.0161357	0.327504	0	0	0.992077	5.38862	3.32695	28.1924	56.4859	30.7544	39.8758	45.9118	0	8.32973	-Inf	0.124176	-Inf	ZNF12	-	-
chr10:43599152-43599202:mpeak_8754|chr10_43572516_43623559_RET_NM_+|	22.4405	-4.90859	1.9325	-2.54002	0.0110846	0.292288	0	0	0	0	6.65389	54.1294	80.8523	21.8257	32.3317	28.6117	0	8.0391	-Inf	1.29056	-Inf	RET	-	-
chr16:4032739-4032789:mpeak_26629|chr16_4016967_4166186_ADCY9_NM_-|	23.6009	-4.23897	1.63028	-2.60015	0.00931843	0.278041	0	0	1.98415	5.38862	2.66156	55.2571	45.4102	42.6593	33.4094	49.2388	0	8.00776	-Inf	0.269084	-Inf	ADCY9	-	-
chr11:108014730-108014780:mpeak_14099|chr11_107992257_108017996_ACAT1_NM_+|	45.3941	-2.97305	1.49189	-1.99281	0.0462825	0.441196	2.25539	0	10.9129	2.15545	3.32695	124.047	103.004	33.7306	47.4198	127.089	0.993345	7.87325	-2.27687	0.709728	-2.98659	ACAT1	-	-
chr9:131652604-131652657:mpeak_73150|chr9_131644390_131678374_LRRC8A_NM_+|	26.772	-4.32329	1.77762	-2.43206	0.015013	0.319907	0	0	0.992077	1.07772	9.98084	45.1078	53.1632	47.6197	53.8862	55.8927	0	7.65613	-Inf	-0.0946223	-Inf	LRRC8A	-	-
chr5:39067635-39067737:mpeak_56397|chr5_38942480_39074510_RICTOR_NM_-|	28.8707	-4.6024	1.75969	-2.61546	0.0089107	0.27572	0	0	4.96039	5.38862	0	66.534	76.4221	34.7227	38.7981	61.8812	0	7.64317	-Inf	0.663286	-Inf	RICTOR	-	-
chr7:108128609-108128659:mpeak_66470|chr7_108113119_108168605_PNPLA8_NM_-|	35.6229	-4.9596	1.74747	-2.83816	0.00453744	0.216531	0	0	0	5.38862	7.98467	59.7679	104.111	43.6514	75.4407	59.885	0	7.47207	-Inf	0.457819	-Inf	PNPLA8	-	-
chr16:74695976-74696112:mpeak_28666|chr16_74657969_74700779_RFWD3_NM_-|	195.312	-1.66532	0.585733	-2.84314	0.00446713	0.216531	5.63848	12.1832	27.7782	21.5545	31.9387	359.735	396.509	322.425	452.644	322.714	2.35661	7.40322	-1.60415	0.0472928	-1.65144	RFWD3	-	-
chr8:37974154-37974251:mpeak_68205|chr8_37963010_37996481_ASH2L_NM_+|	53.3386	-2.73147	1.33869	-2.04041	0.0413094	0.42543	1.1277	1.10757	2.97623	11.855	7.31928	71.0448	134.016	56.5484	142.26	105.131	1.09005	7.28779	-2.72386	0.0172272	-2.74109	ASH2L	-	-
chr1:232577099-232577145:mpeak_7339|chr1_232535019_232651243_SIPA1L2_NM_-|	28.5273	-4.75324	1.66951	-2.84708	0.00441218	0.216531	0	0	5.95246	0	3.32695	64.2787	84.175	33.7306	53.8862	39.9233	0	7.27568	-Inf	0.804024	-Inf	SIPA1L2	-	-
chr10:114804667-114804717:mpeak_10652|chr10_114710008_114925313_TCF7L2_NM_+|	26.0798	-4.50228	2.07719	-2.16748	0.0301982	0.388783	0	0	0	0	9.31545	43.9801	76.4221	49.6039	35.5649	45.9118	0	7.10666	-Inf	0.46237	-Inf	TCF7L2	-	-
chr13:20233124-20233220:mpeak_19258|chr13_20207787_20245973_MPHOSPH8_NM_+|	32.0421	-4.99512	2.06422	-2.41986	0.0155266	0.322854	0	0	0	0	9.31545	73.3002	101.896	33.7306	63.5857	38.5926	0	6.85418	-Inf	0.951295	-Inf	MPHOSPH8	-	-
chr15:60768325-60768372:mpeak_24948|chr15_60715961_60771359_ICE2_NM_-|	25.0805	-3.92476	1.69009	-2.32222	0.020221	0.345802	0	0	2.97623	5.38862	1.33078	57.5125	40.98	56.5484	30.1763	55.8927	0	6.79835	-Inf	0.0508977	-Inf	ICE2	-	-
chr17:48165578-48165654:mpeak_31711|chr17_48133339_48166473_ITGA3_NM_+|	25.2676	-3.24091	1.61404	-2.00795	0.0446482	0.438659	0	0	6.94454	3.23317	1.99617	29.3201	31.0119	62.5009	57.1194	60.5504	0	6.75686	-Inf	-0.993407	-Inf	ITGA3	-	-
chr12:112303086-112303135:mpeak_18317|chr12_112280031_112330770_MAPKAPK5_NM_+|	40.9083	-2.79388	1.41862	-1.96943	0.0489032	0.448409	1.1277	1.10757	2.97623	0	9.31545	73.3002	138.446	50.5959	60.3525	71.862	1.05563	6.72373	-1.8742	0.796948	-2.67115	MAPKAPK5	-	-
chrX:41682205-41682255:mpeak_74220|chrX_41379849_41782287_CASK_NM_-|	23.0108	-4.35073	2.11657	-2.05556	0.0398252	0.419972	0	0	0	0	7.31928	36.0863	77.5296	18.8495	51.7307	38.5926	0	6.70431	-Inf	0.642514	-Inf	CASK	-	-
chr17:53014961-53015011:mpeak_31828|chr17_52978051_53038595_TOM1L1_NM_+|	22.5388	-4.20555	1.6963	-2.47925	0.0131661	0.306112	0	0	2.97623	0	4.65772	47.3632	56.4859	26.7861	39.8758	47.2426	0	6.70207	-Inf	0.451627	-Inf	TOM1L1	-	-
chr5:77511865-77511922:mpeak_57262|chr5_77298879_77590579_AP3B1_NM_-|	22.1142	-4.01769	2.013	-1.99588	0.0459474	0.440449	0	0	0	0	7.98467	40.597	50.9481	30.7544	40.9535	49.9042	0	6.56569	-Inf	0.17523	-Inf	AP3B1	-	-
chr2:171927759-171927813:mpeak_41728|chr2_171850466_172087824_TLK1_NM_-|	40.6699	-5.15369	1.7313	-2.97677	0.00291302	0.178361	0	0	2.97623	0	9.31545	107.131	98.5734	73.4137	47.4198	67.8697	0	6.51376	-Inf	0.709416	-Inf	TLK1	-	-
chr13:21429854-21429910:mpeak_19339|chr13_21358058_21476913_XPO4_NM_-|	44.1056	-3.53348	1.58258	-2.23273	0.0255669	0.370703	1.1277	0	6.94454	3.23317	3.99233	86.8326	117.402	58.5326	85.1402	77.8505	0.552157	6.39664	-3.06643	0.467732	-3.53416	XPO4	-	-
chr5:128889212-128889265:mpeak_58240|chr5_128796102_129072759_ADAMTS19_NM_+|	20.2896	-3.36163	1.69437	-1.98399	0.0472564	0.441685	0	0	0	2.15545	5.32311	34.9586	31.0119	37.6989	48.4976	43.2503	0	5.77732	-Inf	-0.387506	-Inf	ADAMTS19	-	-
chr5:145854707-145854760:mpeak_58976|chr5_145826872_145890003_TCERG1_NM_+|	22.2802	-3.92503	1.87782	-2.09021	0.036599	0.414351	0	0	0	0	6.65389	45.1078	52.0556	40.6752	37.7203	40.5887	0	5.59225	-Inf	0.292678	-Inf	TCERG1	-	-
chr6:43564201-43564329:mpeak_61452|chr6_43543877_43581396_POLH_NM_+|	57.6073	-3.81385	1.62313	-2.34969	0.0187891	0.338816	1.1277	0	5.95246	1.07772	7.98467	106.003	172.78	93.2553	75.4407	112.451	0.404506	5.34058	-3.14998	0.572786	-3.72276	POLH	-	-
chr4:106744387-106744445:mpeak_54493|chr4_106629940_106766597_GSTCD_NM_+|	69.2036	-4.27637	1.79244	-2.38578	0.0170429	0.330813	0	0	13.8891	0	12.6424	99.2372	52.0556	161.709	173.514	178.99	0	5.15964	-Inf	-1.18006	-Inf	GSTCD	-	-
chr6:18149271-18149405:mpeak_60297|chr6_18131011_18155396_TPMT_NM_-|	34.2965	-4.14529	1.65798	-2.50021	0.012412	0.30409	0	0	5.95246	0	3.99233	81.1941	56.4859	57.5405	81.907	55.8927	0	5.09102	-Inf	0.0802924	-Inf	TPMT	-	-
chrX:2832642-2832693:mpeak_73701|chrX_2825673_2847416_ARSD_NM_-|	248.239	-1.81755	0.914041	-1.98848	0.0467588	0.441473	2.25539	2.21513	3.96831	4.3109	12.6424	489.42	521.664	518.856	430.012	497.046	0.442152	1.44695	-1.64151	0.0688832	-1.7104	ARSD	chrX:2832640:-	-
chr9:96295323-96295390:mpeak_71940|chr9_96213977_96326510_FAM120A_NM_+|	6064.38	-2.45157	0.990194	-2.47585	0.0132921	0.306464	0	3.3227	4.96039	15.0881	5.32311	12152	13963.1	10952.5	11219.1	12328.3	0.0127233	0.073541	-2.34783	0.183254	-2.53108	FAM120A	chr9:96295385:+	chr9_93533100_+
chr9:91966177-91966231:mpeak_71816|chr9_91933387_91973635_SECISBP2_NM_+|	102.164	-4.37839	1.83027	-2.39221	0.0167473	0.330437	0	0	8.9287	1.07772	0	224.411	255.848	121.033	213.389	196.955	0	1.88311	-Inf	0.439038	-Inf	SECISBP2	chr9:91966234:+	-
chr9:35742950-35743000:mpeak_71235|chr9_35737444_35749225_GBA2_NM_-|	40.2426	-4.26386	1.67306	-2.54854	0.0108176	0.291119	0	0	1.98415	3.23317	3.99233	76.6833	101.896	56.5484	108.85	49.2388	0	4.2908	-Inf	0.319627	-Inf	GBA2	chr9:35742949:-	chr9_35742953_-
chr9:139366219-139366272:mpeak_73526|chr9_139336275_139378211_SEC16A_NM_-|	308.919	-4.0806	1.55651	-2.62163	0.00875105	0.27572	0	0	3.96831	0	3.99233	670.979	703.305	582.349	555.028	569.573	0	0.466367	-Inf	0.272221	-Inf	SEC16A	chr9:139366221:-	chr9_136471770_-
chr9:132583605-132583706:mpeak_73200|chr9_132576501_132586441_TOR1A_NM_-|	118.05	-4.97545	2.02375	-2.45854	0.0139505	0.311439	0	0	19.8415	3.23317	0	186.07	234.804	249.011	236.022	251.517	0	3.13281	-Inf	-0.222433	-Inf	TOR1A	chr9:132583615:-;chr9:132583655:-	chr9_129821377_-
chr9:116130841-116130907:mpeak_72596|chr9_116111811_116131895_BSPRY_NM_+|	291.882	-2.61395	0.963673	-2.71249	0.00667804	0.252596	3.38309	0	10.9129	10.7772	12.6424	522.123	549.353	655.763	685.432	468.434	0.315741	1.89721	-2.7582	-0.171132	-2.58707	BSPRY	chr9:116130908:+	chr9_113368626_+
chr9:100770049-100770106:mpeak_72117|chr9_100745488_100777645_ANP32B_NM_+|	2437.08	-3.58118	1.51142	-2.36942	0.0178162	0.334243	0	1.10757	5.95246	8.62179	5.32311	4841.2	5114.74	4573.48	4500.57	5319.79	0.0111247	0.138235	-3.58215	0.0531405	-3.63529	ANP32B	chr9:100770102:+	chr9_98007823_+
chr8:80857616-80857666:mpeak_69011|chr8_80831383_80942506_MRPS28_NM_-|	52.5648	-4.25495	1.63605	-2.60074	0.00930219	0.278041	0	0	1.98415	2.15545	5.9885	127.43	88.6053	102.184	72.2075	125.093	0	3.38184	-Inf	0.113745	-Inf	MRPS28	chr8:80857615:-	chr8_79945381_-
chr8:17411598-17411674:mpeak_67741|chr8_17354596_17422458_SLC7A2_NM_+|	316.307	-2.21184	0.886064	-2.49625	0.0125514	0.304798	1.1277	7.75296	11.9049	7.54407	10.6462	1051.01	752.038	649.811	272.664	398.568	0.492535	2.27814	-1.17583	1.03372	-2.20956	SLC7A2	chr8:17411656:+	chr8_17554128_+
chr8:145516852-145516939:mpeak_70564|chr8_145515269_145537787_HSF1_NM_+|	388.424	-1.34137	0.559234	-2.39858	0.0164586	0.327504	10.1493	16.6135	22.8178	36.6426	33.2695	756.684	832.89	620.048	928.998	626.131	1.68364	4.26309	-1.20784	0.132469	-1.34031	HSF1	chr8:145516923:+	chr8_144293238_+
chr8:141760296-141760351:mpeak_70355|chr8_141669777_142011412_PTK2_NM_-|	119.397	-3.22084	1.60575	-2.00582	0.0448754	0.43902	1.1277	0	2.97623	6.46634	3.32695	223.284	315.656	146.827	278.053	216.251	0.209243	1.99172	-2.91629	0.334467	-3.25076	PTK2	chr8:141760299:-	chr8_140750202_-
chr8:141744426-141744534:mpeak_70353|chr8_141669777_142011412_PTK2_NM_-|	119.275	-4.72716	1.62446	-2.90998	0.00361447	0.193906	0	0	6.94454	1.07772	4.65772	223.284	315.656	146.827	278.053	216.251	0	1.97775	-Inf	0.334467	-Inf	PTK2	chr8:141744482:-	chr8_140734385_-
chr8:141466546-141466663:mpeak_70320|chr8_140743471_141468678_TRAPPC9_NM_-|	85.8269	-4.51168	1.56907	-2.87539	0.00403535	0.212321	0	0	1.98415	6.46634	4.65772	148.856	203.792	171.629	177.824	143.059	0	2.6615	-Inf	0.103031	-Inf	TRAPPC9	chr8:141466612:-	chr8_140456514_-
chr8:141262671-141262726:mpeak_70314|chr8_140743471_141468678_TRAPPC9_NM_-|	85.5595	-4.01537	1.65075	-2.43245	0.0149971	0.319907	0	0	3.96831	6.46634	0	148.856	203.792	171.629	177.824	143.059	0	2.11866	-Inf	0.103031	-Inf	TRAPPC9	chr8:141262670:-	chr8_140252572_-
chr8:126021273-126021393:mpeak_70155|chr8_126010719_126033994_SQLE_NM_+|	213.062	-4.08667	1.50425	-2.71674	0.00659278	0.251691	0	1.10757	8.9287	5.38862	9.98084	454.461	452.995	398.815	411.69	387.256	0.122052	2.02863	-3.87042	0.184521	-4.05494	SQLE	chr8:126021381:+	chr8_125009128_+
chr8:11661290-11661350:mpeak_67672|chr8_11653081_11695896_FDFT1_NM_+|	275.753	-3.36688	0.928845	-3.6248	0.000289186	0.0752264	2.25539	1.10757	16.8653	17.2436	15.9693	517.612	589.225	508.936	613.225	475.088	0.303835	3.13528	-3.31142	0.0558174	-3.36724	FDFT1	chr8:11661344:+	chr8_11803834_+
chr8:104342953-104343003:mpeak_69713|chr8_104310660_104343568_FZD6_NM_+|	74.2056	-3.85046	1.7659	-2.18045	0.029224	0.387027	0	0	6.94454	3.23317	0	119.536	162.812	90.279	170.28	188.971	0	2.26408	-Inf	-0.0859802	-Inf	FZD6	chr8:104343005:+	chr8_103330776_+
chr7:66456045-66456101:mpeak_65350|chr7_66453486_66460588_SBDS_NM_-|	132.434	-3.81296	1.79141	-2.12848	0.0332976	0.401332	1.1277	0	0.992077	3.23317	15.3039	369.884	193.824	296.631	169.203	274.14	0.20005	2.63917	-3.52922	0.192437	-3.72166	SBDS	chr7:66456046:-	chr7_66991060_-
chr7:6626552-6626602:mpeak_64178|chr7_6617064_6628247_ZDHHC4_NM_+|	134.165	-3.47501	1.64204	-2.11627	0.0343217	0.403459	0	0	0	2.15545	5.32311	209.751	261.386	298.615	353.493	210.928	0	0.86654	-Inf	-0.288313	-Inf	ZDHHC4	chr7:6626603:+	-
chr7:32603743-32603799:mpeak_64709|chr7_32535037_32623403_AVL9_NM_+|	88.2942	-4.8048	1.59786	-3.00703	0.00263813	0.172034	0	0	1.98415	5.38862	7.31928	134.196	238.127	154.764	182.135	159.028	0	2.96254	-Inf	0.171387	-Inf	AVL9	chr7:32603795:+	chr7_32564181_+;chr7_32564235_+
chr7:2605305-2605361:mpeak_63994|chr7_2598605_2649677_IQCE_NM_+|	80.0186	-4.02773	1.75487	-2.29518	0.0217228	0.354053	0	0	8.9287	0	0.665389	165.771	168.35	142.859	137.949	175.663	0	2.1018	-Inf	0.134813	-Inf	IQCE	chr7:2605365:+	-
chr6:83984355-83984407:mpeak_62056|chr6_83921813_84140938_ME1_NM_-|	180.303	-4.09622	1.64854	-2.48475	0.0129641	0.306112	0	0	0	8.62179	2.66156	303.35	405.369	300.599	453.722	328.702	0	1.04184	-Inf	-0.0268154	-Inf	ME1	chr6:83984356:-	chr6_83274638_-
chr6:83895013-83895066:mpeak_62044|chr6_83879042_83903655_PGM3_NM_-|	76.5977	-4.75392	1.55587	-3.05548	0.00224701	0.168315	0	0	1.98415	9.69951	4.65772	161.26	147.306	138.891	149.804	152.374	0	3.70496	-Inf	0.0695425	-Inf	PGM3	chr6:83895014:-	chr6_83185294_-
chr6:75967972-75968151:mpeak_61898|chr6_75966011_75994632_TMEM30A_NM_-|	316.798	-1.6289	0.779965	-2.08842	0.0367597	0.414759	7.89387	2.21513	2.97623	10.7772	15.3039	760.067	830.675	560.524	478.509	499.042	0.63549	1.88921	-0.938303	0.633536	-1.57184	TMEM30A	chr6:75967970:-;chr6:75968097:-	chr6_75258256_-;chr6_75258383_-
chr6:27113742-27113835:mpeak_60562|chr6_27106460_27114637_HIST1H2BK_NM_-|	213.353	-1.5329	0.714997	-2.14393	0.0320384	0.397238	5.63848	2.21513	13.8891	16.1659	10.6462	345.075	409.8	393.855	518.385	417.864	1.04039	3.06	-1.78868	-0.232268	-1.55641	HIST1H2BK	chr6:27113749:-	chr6_27145971_-
chr6:17771839-17771895:mpeak_60283|chr6_17761108_17987854_KIF13A_NM_-|	51.9294	-3.96025	1.86301	-2.12573	0.0335259	0.4029	0	0	0.992077	0	9.98084	80.0664	96.3583	98.2157	87.2956	146.386	0	3.30612	-Inf	-0.32672	-Inf	KIF13A	chr6:17771838:-	-
chr6:159034281-159034331:mpeak_63632|chr6_158957467_159052841_TMEM181_NM_+|	79.1999	-3.72188	1.5829	-2.35131	0.0187076	0.338816	0	1.10757	1.98415	2.15545	5.32311	274.03	187.179	105.16	109.928	105.131	0.240144	2.95507	-2.5099	1.11132	-3.62122	TMEM181	chr6:159034332:+	chr6_158613302_+;chr6_158613339_+
chr6:152134820-152134881:mpeak_63488|chr6_152011630_152419866_ESR1_NM_+|	606.973	-2.77908	0.895735	-3.10257	0.00191849	0.16249	4.51078	1.10757	1.98415	9.69951	2.66156	2344.48	2137.6	616.08	478.509	473.092	0.125351	0.91506	-0.76739	2.1005	-2.86789	ESR1	chr6:152134875:+	-
chr6:152132464-152132521:mpeak_63485|chr6_152011630_152419866_ESR1_NM_+|	614.357	-1.27597	0.483201	-2.64066	0.00827447	0.272758	25.937	24.3665	18.8495	14.0104	10.6462	2344.48	2137.6	616.08	478.509	473.092	1.12232	2.77519	0.794402	2.1005	-1.3061	ESR1	chr6:152132516:+	chr6_151811379_+
chr6:152132336-152132392:mpeak_63484|chr6_152011630_152419866_ESR1_NM_+|	607.386	-1.80643	0.736899	-2.45139	0.0142304	0.312733	9.02157	2.21513	2.97623	3.23317	6.65389	2344.48	2137.6	616.08	478.509	473.092	0.250703	0.82053	0.38992	2.1005	-1.71058	ESR1	chr6:152132393:+	chr6_151811256_+
chr6:151757372-151757449:mpeak_63443|chr6_151726402_151773316_RMND1_NM_-|	41.1675	-4.08857	1.64049	-2.49229	0.0126923	0.306112	0	0	0.992077	3.23317	5.9885	99.2372	57.5934	82.3424	71.1298	91.1583	0	4.17517	-Inf	-0.0564341	-Inf	RMND1	chr6:151757370:-;chr6:151757397:-	chr6_151436231_-
chr6:150163308-150163457:mpeak_63381|chr6_150141839_150185480_LRP11_NM_-|	285.669	-1.48092	0.75545	-1.96032	0.0499588	0.452893	5.63848	3.3227	3.96831	10.7772	11.977	607.828	738.747	435.522	435.4	603.508	0.665479	1.8124	-0.991335	0.454099	-1.44543	LRP11	chr6:150163355:-	-
chr6:127633769-127633827:mpeak_62883|chr6_127611422_127664754_ECHDC1_NM_-|	226.031	-3.58981	1.5282	-2.34905	0.0188215	0.338816	0	1.10757	6.94454	8.62179	2.66156	499.569	491.759	393.855	424.623	431.172	0.111725	1.45864	-3.45572	0.250874	-3.70659	ECHDC1	chr6:127633776:-	chr6_127312626_-
chr6:10400951-10401001:mpeak_60122|chr6_10398938_10419797_TFAP2A_NM_-|	44.6216	-3.65979	1.61828	-2.26153	0.0237263	0.361981	0	0	0	3.23317	5.9885	74.4279	74.2069	88.2949	91.6065	108.458	0	3.19797	-Inf	-0.371135	-Inf	TFAP2A	chr6:10400947:-	-
chr5:73998424-73998474:mpeak_57127|chr5_73935847_74016942_HEXB_NM_+|	307.753	-3.90591	1.59602	-2.44728	0.014394	0.313133	0	0	3.96831	2.15545	3.32695	545.805	656.787	471.237	579.815	814.436	0	0.506607	-Inf	-0.0484442	-Inf	HEXB	chr5:73998476:+	-
chr5:43613271-43613338:mpeak_56506|chr5_43602790_43704356_NNT_NM_+|	111.267	-2.66728	1.18588	-2.24919	0.0245004	0.368314	1.1277	1.10757	8.9287	3.23317	9.98084	189.453	225.944	267.861	236.022	169.009	0.538103	3.29068	-2.72335	-0.110922	-2.61243	NNT	chr5:43613324:+	chr5_43613221_+
chr5:34947908-34947958:mpeak_56267|chr5_34929697_34954657_DNAJC21_NM_+|	64.3108	-4.42302	1.82972	-2.41733	0.0156349	0.324069	0	0	0	0	7.98467	171.41	140.661	110.121	99.1506	113.782	0	2.47163	-Inf	0.535066	-Inf	DNAJC21	chr5:34947956:+	-
chr5:214017-214067:mpeak_55794|chr5_206073_218297_CCDC127_NM_-|	28.8928	-3.60697	1.65841	-2.17497	0.0296327	0.388211	0	0	2.97623	2.15545	3.32695	38.3417	64.2388	58.5326	75.4407	43.9157	0	4.755	-Inf	-0.209258	-Inf	CCDC127	chr5:214012:-	chr5_213888_-
chr5:172355915-172355965:mpeak_59445|chr5_172261222_172377711_ERGIC1_NM_+|	1643.24	-4.12597	1.58347	-2.60564	0.00917015	0.278041	0	0	1.98415	7.54407	1.33078	3881.53	3035.84	3482.19	2722.33	3299.66	0	0.114255	-Inf	0.126623	-Inf	ERGIC1	chr5:172355968:+	chr5_172928964_+
chr5:153736972-153737033:mpeak_59160|chr5_153570294_153796373_GALNT10_NM_+|	88.1704	-2.24694	0.986411	-2.2779	0.0227326	0.358919	1.1277	2.21513	8.9287	6.46634	3.32695	204.113	201.577	149.804	158.425	145.72	0.823986	4.12425	-1.90063	0.422809	-2.32344	GALNT10	chr5:153737028:+	-
chr5:10400896-10401040:mpeak_56004|chr5_10353750_10433705_MARCH6_NM_+|	634.118	-3.06513	1.54091	-1.98918	0.0466818	0.441473	1.1277	0	1.98415	6.46634	4.65772	1279.93	1357.88	1121.05	1440.92	1127.17	0.0427512	0.35532	-2.95406	0.101022	-3.05508	MARCH6	chr5:10401032:+	chr5_10400923_+
chr4:77566746-77566796:mpeak_53887|chr4_77356252_77699961_SHROOM3_NM_+|	56.1275	-3.69839	1.78431	-2.07272	0.038198	0.419158	0	0	0	0	7.31928	101.493	111.864	115.081	116.394	109.124	0	2.14894	-Inf	-0.0898434	-Inf	SHROOM3	chr4:77566798:+	-
chr4:3125497-3125547:mpeak_52690|chr4_3076236_3241572_HTT_NM_+|	120.808	-3.391	1.5809	-2.14498	0.0319543	0.396794	1.1277	0	0	6.46634	6.65389	237.944	313.441	195.439	218.778	228.228	0.204521	2.04223	-2.95538	0.364448	-3.31983	HTT	chr4:3125549:+	chr4_3123820_+
chr4:2256139-2256191:mpeak_52624|chr4_2252428_2263739_MXD4_NM_-|	202.906	-3.13882	1.5704	-1.99874	0.0456367	0.439655	1.1277	0	4.96039	1.07772	7.31928	323.649	495.082	401.791	381.514	412.541	0.137737	1.11698	-2.98123	0.038391	-3.01962	MXD4	chr4:2256140:-;chr4:2256167:-	chr4_2254414_-;chr4_2254458_-
chr4:1958099-1958149:mpeak_52599|chr4_1873122_1980364_WHSC1_NM_+|	238.594	-3.62288	1.66638	-2.1741	0.0296977	0.388211	0	0	0	1.07772	5.9885	474.76	434.166	344.251	524.851	600.846	0	0.480712	-Inf	-0.108569	-Inf	WHSC1	chr4:1958150:+	chr4_1956422_+
chr4:17584645-17584698:mpeak_52976|chr4_17578926_17609022_LAP3_NM_+|	52.5242	-4.20529	1.62853	-2.58226	0.00981555	0.283126	0	0	1.98415	4.3109	5.32311	87.9603	110.757	82.3424	148.726	83.839	0	3.68939	-Inf	-0.0792503	-Inf	LAP3	chr4:17584701:+	-
chr4:166262288-166262338:mpeak_55443|chr4_166248817_166262902_MSMO1_NM_+|	216.409	-4.18278	1.55969	-2.6818	0.0073228	0.258208	0	0	3.96831	0	3.99233	483.781	516.126	377.981	383.67	394.576	0	0.688502	-Inf	0.375404	-Inf	MSMO1	chr4:166262338:+	chr4_165341185_+
chr4:123198022-123198071:mpeak_54814|chr4_123091757_123283185_KIAA1109_NM_+|	57.6263	-3.82033	1.67115	-2.28604	0.0222517	0.356722	0	0	2.97623	0	4.65772	92.471	140.661	90.279	94.8397	150.378	0	2.27542	-Inf	0.0598109	-Inf	KIAA1109	chr4:123198073:+	chr4_122276916_+
chr4:106387754-106387804:mpeak_54467|chr4_106290910_106395227_PPA2_NM_-|	301.452	-4.04443	1.71313	-2.36084	0.0182335	0.337833	0	0	7.93662	2.15545	0	505.208	759.791	447.427	663.878	628.127	0	0.580193	-Inf	0.125481	-Inf	PPA2	chr4:106387750:-	chr4_105466597_-
chr3:71628945-71629016:mpeak_49531|chr3_71008542_71633140_FOXP1_NM_-|	456.398	-3.67045	1.73475	-2.11583	0.0343589	0.403459	0	0	0	9.69951	0.665389	775.855	849.503	952.394	891.278	1084.58	0	0.353962	-Inf	-0.264322	-Inf	FOXP1	chr3:71628962:-	chr3_71579796_-
chr3:49041977-49042035:mpeak_48934|chr3_49027340_49044119_P4HTM_NM_+|	46.8216	-4.40225	1.78668	-2.46393	0.0137422	0.309878	0	0	0	2.15545	9.31545	80.0664	107.434	64.485	105.617	99.143	0	4.26039	-Inf	0.0629364	-Inf	P4HTM	chr3:49042028:+	chr3_49004594_+
chr3:19995918-19996082:mpeak_48189|chr3_19988571_20025199_RAB5A_NM_+|	340.324	-1.20972	0.52804	-2.29097	0.0219653	0.355023	12.4047	9.9681	25.794	24.7876	27.281	583.019	732.101	555.563	788.894	643.431	1.70119	3.91685	-1.21423	-0.0110798	-1.20315	RAB5A	chr3:19995977:+;chr3:19996018:+	chr3_19954483_+;chr3_19954524_+
chr3:182633639-182633694:mpeak_51799|chr3_182511290_182635810_ATP11B_NM_+|	30.0977	-3.37624	1.663	-2.03022	0.0423346	0.430546	0	0	0	6.46634	3.32695	36.0863	53.1632	74.4058	68.9743	58.5542	0	4.84974	-Inf	-0.593009	-Inf	ATP11B	chr3:182633692:+	chr3_182915902_+
chr3:15370801-15370960:mpeak_48100|chr3_15297810_15382901_SH3BP5_NM_-|	272.327	-3.20067	1.5778	-2.02856	0.0425034	0.430701	1.1277	0	0	8.62179	3.99233	543.549	690.014	494.055	442.944	538.965	0.0914178	0.854636	-2.89863	0.326136	-3.22476	SH3BP5	chr3:15370904:-	chr3_15329385_-
chr3:13459495-13459563:mpeak_47986|chr3_13359281_13461819_NUP210_NM_-|	414.749	-2.13386	0.84148	-2.53584	0.0112179	0.293237	5.63848	2.21513	11.9049	6.46634	23.2886	782.621	1032.25	654.771	722.075	906.26	0.432736	1.8247	-1.82227	0.253833	-2.0761	NUP210	chr3:13459506:-	chr3_13418008_-
chr3:128999662-128999719:mpeak_50528|chr3_128997683_129023431_HMCES_NM_+|	99.4396	-2.38283	1.15951	-2.05504	0.0398756	0.419972	3.38309	0	11.9049	8.62179	7.31928	201.858	172.78	113.097	148.726	326.706	0.903029	4.73146	-2.4561	-0.0666537	-2.38944	HMCES	chr3:128999721:+	chr3_129280876_+
chr3:105273860-105273910:mpeak_49892|chr3_105085556_105293320_ALCAM_NM_+|	301.635	-4.82534	1.5638	-3.08565	0.00203108	0.16506	0	0	0	4.3109	6.65389	796.153	690.014	549.611	492.52	477.084	0	0.72174	-Inf	0.553233	-Inf	ALCAM	chr3:105273911:+	chr3_105555066_+
chr21:48077875-48077937:mpeak_46351|chr21_48055506_48084206_PRMT2_NM_+|	209.802	-5.67168	1.54951	-3.6603	0.000251916	0.0752264	0	0	6.94454	17.2436	5.9885	434.163	434.166	434.53	420.312	344.672	0	2.51574	-Inf	0.118826	-Inf	PRMT2	chr21:48077935:+	chr21_46658013_+
chr21:47688242-47688315:mpeak_46315|chr21_47655340_47705308_MCM3AP_NM_-|	72.9673	-5.04133	1.65475	-3.04659	0.00231452	0.168315	0	0	5.95246	5.38862	0.665389	189.453	204.9	96.2315	146.57	80.5121	0	3.71356	-Inf	0.871513	-Inf	MCM3AP	chr21:47688267:-	chr21_46268351_-
chr21:43996005-43996064:mpeak_46083|chr21_43919741_44000454_SLC37A1_NM_+|	185.585	-2.60334	1.19894	-2.17137	0.0299029	0.388211	2.25539	0	4.96039	2.15545	5.32311	433.035	511.696	233.138	286.675	376.61	0.238734	1.38762	-1.87845	0.660686	-2.53914	SLC37A1	chr21:43996059:+	chr21_42575959_+
chr21:27393080-27393155:mpeak_45615|chr21_27254082_27543446_APP_NM_-|	506.719	-4.19459	1.62266	-2.585	0.00973793	0.283126	0	0	0	1.07772	7.31928	1062.29	1130.83	918.664	861.101	1085.92	0	0.29302	-Inf	0.199066	-Inf	APP	chr21:27393077:-;chr21:27393104:-	chr21_26020764_-
chr20:30701379-30701429:mpeak_44112|chr20_30697308_30753097_TM9SF4_NM_+|	59.1889	-3.77687	1.84709	-2.04477	0.040878	0.42418	0	0	0	0	7.98467	103.748	119.617	103.176	119.627	137.736	0	2.21465	-Inf	-0.105788	-Inf	TM9SF4	chr20:30701419:+	chr20_32113617_+
chr2:96873744-96873804:mpeak_40147|chr2_96852652_96874573_STARD7_NM_-|	598.802	-1.31013	0.551545	-2.37538	0.0175308	0.333219	14.66	16.6135	29.7623	35.5649	15.9693	1429.92	1471.96	985.133	1138.08	850.367	1.0777	2.73397	-0.793289	0.549748	-1.34304	STARD7	chr2:96873753:-	chr2_96208015_-
chr2:68364061-68364114:mpeak_39422|chr2_68361931_68384678_WDR92_NR_-mpeak_39422|chr2_68358577_68384692_WDR92_NM_-||	70.3012	-3.79866	1.67514	-2.26768	0.023349	0.361951	0	0	3.96831	6.46634	0	139.834	122.94	145.835	173.514	110.455	0	2.42777	-Inf	-0.124892	-Inf	WDR92	chr2:68364060:-	-
chr2:55838587-55838661:mpeak_39154|chr2_55777142_55844860_SMEK2_NM_-|	119.78	-3.72861	1.6022	-2.32719	0.0199554	0.344105	0	0	4.96039	0	3.32695	207.496	252.525	193.455	284.519	251.517	0	1.13604	-Inf	-0.0802281	-Inf	SMEK2	chr2:55838587:-	chr2_55611451_-
chr2:216211536-216211827:mpeak_42767|chr2_216176678_216214258_ATIC_NM_+|	368.741	-1.2143	0.595861	-2.03789	0.0415607	0.425693	13.5323	11.0757	45.6356	19.399	21.2925	745.407	684.476	753.979	674.655	717.955	1.72098	4.02159	-1.22572	-0.0011864	-1.22454	ATIC	chr2:216211775:+;chr2:216211819:+	chr2_215346852_+;chr2_215346872_+
chr2:190329745-190329795:mpeak_42134|chr2_190306158_190339938_WDR75_NM_+|	33.718	-3.92012	1.66255	-2.3579	0.0183784	0.338816	0	0	3.96831	0	3.99233	55.2571	84.175	54.5643	56.0416	79.1813	0	4.19451	-Inf	0.140143	-Inf	WDR75	chr2:190329788:+	chr2_189465063_+
chr2:178081045-178081108:mpeak_41934|chr2_178077421_178084135_HNRNPA3_NM_+mpeak_41934|chr2_178077421_178084135_HNRNPA3_NM_+||	713.055	-1.69757	0.690846	-2.45724	0.0140011	0.311439	5.63848	4.43027	14.8812	9.69951	8.65006	1615.99	1923.84	931.561	1254.47	1361.39	0.284441	0.936759	-1.13767	0.581874	-1.71955	HNRNPA3	chr2:178081109:+	chr2_177216380_+
chr2:10927289-10927344:mpeak_37998|chr2_10924452_10978103_PDIA6_NM_-|	1974.78	-4.50249	1.57573	-2.8574	0.00427127	0.216531	0	0	8.9287	2.15545	2.66156	3793.57	4335.01	3042.7	4491.95	4070.85	0	0.118441	-Inf	0.071229	-Inf	PDIA6	chr2:10927291:-	chr2_10787168_-
chr19:34922868-34922973:mpeak_36211|chr19_34919267_34959944_UBA2_NM_+|	219.104	-3.89651	1.63319	-2.38583	0.0170407	0.330813	0	0	2.97623	0	8.65006	336.053	361.067	461.316	602.448	418.53	0	0.784345	-Inf	-0.50339	-Inf	UBA2	chr19:34922967:+	chr19_34432061_+
chr19:3364845-3364900:mpeak_34808|chr19_3359560_3462749_NFIC_NM_+|	280.748	-4.90329	1.62112	-3.02463	0.00248938	0.168315	0	0	8.9287	0	10.6462	471.377	569.289	659.731	503.297	584.212	0	1.12033	-Inf	-0.162608	-Inf	NFIC	chr19:3364896:+	chr19_3364897_+
chr19:23992043-23992098:mpeak_36010|chr19_23945815_24009871_RPSAP58_NR_+|	1545.32	-4.08087	1.58529	-2.57421	0.0100469	0.287334	0	0	0.992077	7.54407	1.99617	3114.7	3300.55	3233.18	3394.83	2399.39	0	0.11667	-Inf	0.0921554	-Inf	RPSAP58	chr19:23992099:+	-
chr19:1643744-1643795:mpeak_34719|chr19_1611848_1652328_TCF3_NM_-|	356.312	-4.86206	1.56142	-3.11386	0.00184655	0.16249	0	0	2.97623	2.15545	9.98084	709.321	771.974	657.747	760.873	648.089	0	0.731236	-Inf	0.104485	-Inf	TCF3	chr19:1643742:-;chr19:1643767:-	chr19_1643745_-
chr18:9124911-9124987:mpeak_33529|chr18_9102627_9134183_NDUFV2_NM_+|	497.57	-3.01004	1.21671	-2.47391	0.0133643	0.307266	2.25539	0	4.96039	2.15545	13.3078	973.201	1254.87	868.068	879.423	977.457	0.101226	0.749505	-2.59383	0.294532	-2.88836	NDUFV2	chr18:9124971:+	-
chr18:9103743-9103811:mpeak_33523|chr18_9102627_9134183_NDUFV2_NM_+|	498.16	-1.69498	0.809797	-2.09309	0.0363407	0.41339	4.51078	1.10757	7.93662	9.69951	5.32311	973.201	1254.87	868.068	879.423	977.457	0.252162	0.842558	-1.44589	0.294532	-1.74043	NDUFV2	chr18:9103805:+	chr18_9103806_+
chr18:32918839-32918907:mpeak_34030|chr18_32917734_32924431_ZNF24_NM_-|	394.466	-3.70069	1.52421	-2.42794	0.015185	0.319907	1.1277	0	9.92077	11.855	4.65772	639.403	796.34	797.63	800.749	882.971	0.0785444	1.06529	-3.96595	-0.204365	-3.76159	ZNF24	chr18:32918840:-	chr18_35338884_-
chr18:3249113-3249163:mpeak_33461|chr18_3247479_3255743_MYL12A_NM_+|	829.973	-3.88381	1.58895	-2.44425	0.0145152	0.313188	0	0	0	6.46634	3.32695	1555.09	1651.38	1356.17	1689.87	2037.42	0	0.19265	-Inf	-0.0798613	-Inf	MYL12A	chr18:3249165:+	chr18_3249184_+
chr18:23667462-23667546:mpeak_33879|chr18_23598344_23671181_SS18_NM_-|	166.999	-4.0234	1.82301	-2.20701	0.0273134	0.377787	0	0	9.92077	11.855	0	177.048	222.621	339.29	508.686	400.564	0	1.7441	-Inf	-1.0584	-Inf	SS18	chr18:23667461:-	-
chr17:8078889-8078939:mpeak_29868|chr17_8077590_8079714_TMEM107_NM_-|	224.4	-4.13399	1.55161	-2.66432	0.00771442	0.263833	0	0	5.95246	4.3109	1.99617	385.672	474.038	450.403	487.131	434.499	0	0.89353	-Inf	-0.0894306	-Inf	TMEM107	chr17:8078883:-	chr17_8175566_-
chr17:76178548-76178611:mpeak_33062|chr17_76171031_76183285_TK1_NM_-|	311.341	-1.64109	0.830333	-1.97642	0.048107	0.444665	2.25539	2.21513	10.9129	9.69951	9.98084	497.314	467.393	643.858	728.541	741.243	0.463408	1.44742	-2.18973	-0.546607	-1.64313	TK1	chr17:76178552:-	chr17_78182472_-
chr17:73899560-73899650:mpeak_32935|chr17_73895067_73901181_MRPL38_NM_-|	149.439	-3.4286	1.60509	-2.13608	0.0326727	0.397781	1.1277	0	2.97623	3.23317	11.3116	271.775	303.473	365.084	222.011	313.398	0.196036	1.94571	-3.37267	-0.0615703	-3.3111	MRPL38	chr17:73899594:-	chr17_75903457_-;chr17_75903517_-
chr17:59317301-59317357:mpeak_32271|chr17_58755171_59469337_BCAS3_NM_+|	751.729	-3.80357	1.62969	-2.33392	0.0195997	0.343015	0	0	7.93662	2.15545	0	1438.94	1456.45	1603.2	1684.48	1324.12	0	0.218831	-Inf	-0.0866112	-Inf	BCAS3	chr17:59317358:+	chr17_61240008_+
chr17:4869112-4869217:mpeak_29610|chr17_4862938_4871132_SPAG7_NM_-|	788.348	-2.3225	1.15972	-2.00263	0.0452169	0.439615	1.1277	1.10757	5.95246	2.15545	5.32311	1635.16	1878.43	1364.11	1717.89	1272.22	0.0636176	0.30846	-2.00209	0.275494	-2.27758	SPAG7	chr17:4869111:-;chr17:4869148:-	chr17_4965804_-
chr17:41152192-41152265:mpeak_31252|chr17_41150445_41154888_RPL27_NM_+|	1829.98	-4.62208	1.5719	-2.94045	0.00327737	0.188116	0	0	1.98415	7.54407	4.65772	3120.33	4550.99	2879.01	3652.41	4082.83	0	0.13365	-Inf	0.116509	-Inf	RPL27	chr17:41152263:+	chr17_43000212_+;chr17_43000245_+
chr17:38796820-38796877:mpeak_31089|chr17_38785245_38804103_SMARCE1_NM_-|	350.805	-1.92711	0.724631	-2.65944	0.00782713	0.266001	5.63848	1.10757	7.93662	11.855	11.3116	742.024	816.276	597.231	677.888	636.777	0.43291	1.62682	-1.61999	0.289931	-1.90992	SMARCE1	chr17:38796826:-	chr17_40640575_-
chr17:29298748-29298807:mpeak_30650|chr17_29297955_29325679_RNF135_NM_+|	39.2154	-3.90987	1.67321	-2.33675	0.0194523	0.342568	0	0	0.992077	2.15545	6.65389	77.811	62.0237	56.5484	103.461	82.5082	0	4.04152	-Inf	-0.209408	-Inf	RNF135	chr17:29298800:+	chr17_30971780_+
chr17:27222298-27222503:mpeak_30508|chr17_27207617_27224715_FLOT2_NM_-|	124.422	-4.6547	1.61371	-2.88448	0.00392059	0.207614	0	0	11.9049	0	7.31928	199.602	222.621	257.94	264.042	280.794	0	2.39471	-Inf	-0.342031	-Inf	FLOT2	chr17:27222304:-	chr17_28895288_-;chr17_28895366_-
chr17:17000489-17000539:mpeak_30103|chr17_16946073_17088136_MPRIP_NM_+|	78.6617	-4.25521	1.58537	-2.68406	0.00727349	0.258208	0	0	3.96831	1.07772	5.32311	131.94	189.394	150.796	167.047	137.07	0	2.27937	-Inf	0.0834462	-Inf	MPRIP	chr17:17000544:+	chr17_17097225_+
chr16:84119581-84119636:mpeak_28888|chr16_84088250_84150548_MBTPS1_NM_-|	321.08	-3.62208	1.59346	-2.2731	0.0230203	0.360199	0	1.10757	7.93662	12.9327	1.99617	606.7	639.066	553.579	767.339	620.143	0.0889064	1.17799	-3.78274	-0.0548499	-3.72789	MBTPS1	chr16:84119584:-	chr16_84085981_-
chr16:75667761-75667835:mpeak_28732|chr16_75661891_75681585_KARS_NM_-|	679.153	-1.61337	0.708528	-2.27707	0.022782	0.358919	2.25539	5.53783	9.92077	11.855	11.977	1294.59	1497.43	1094.26	1488.34	1375.36	0.279124	0.852782	-1.52975	0.081518	-1.61127	KARS	chr16:75667784:-	chr16_75633885_-
chr16:68335987-68336132:mpeak_28311|chr16_68335308_68344868_SLC7A6OS_NM_-|	146.971	-3.68327	1.71635	-2.14599	0.0318736	0.396515	0	0	0	0	7.31928	286.435	266.923	321.433	311.462	276.136	0	0.805173	-Inf	-0.131155	-Inf	SLC7A6OS	chr16:68335982:-;chr16:68336075:-	chr16_68302081_-
chr16:30765322-30765374:mpeak_27656|chr16_30759619_30768124_PHKG2_NM_+|	71.9043	-3.78724	1.58424	-2.39058	0.016822	0.330813	0	0	3.96831	1.07772	4.65772	142.09	109.649	159.724	168.125	129.751	0	2.12058	-Inf	-0.277198	-Inf	PHKG2	chr16:30765375:+	chr16_30754053_+
chr16:2810791-2810858:mpeak_26483|chr16_2802329_2820858_SRRM2_NM_+|	143.477	-5.04356	1.54677	-3.26069	0.0011114	0.142556	0	0	2.97623	8.62179	3.99233	336.053	337.808	212.305	266.198	266.821	0	2.09176	-Inf	0.439547	-Inf	SRRM2	chr16:2810847:+	chr16_2760842_+
chr16:24775083-24775133:mpeak_27340|chr16_24741048_24834752_TNRC6A_NM_+mpeak_27340|chr16_24741048_24834752_TNRC6A_NM_+||	192.666	-3.53233	1.62736	-2.17059	0.029962	0.388211	0	1.10757	4.96039	6.46634	0	451.078	619.13	295.639	306.074	242.202	0.103491	1.35402	-2.78199	0.927685	-3.70967	TNRC6A	chr16:24775134:+	chr16_24763820_+
chr16:1865365-1865422:mpeak_26353|chr16_1859383_1877195_HAGH_NM_-|	309.562	-2.39567	0.947075	-2.52955	0.0114209	0.295884	3.38309	0	8.9287	10.7772	6.65389	601.062	650.141	552.587	655.256	606.835	0.270387	1.45259	-2.37697	0.048565	-2.42553	HAGH	chr16:1865367:-	chr16_1815368_-
chr16:18537689-18537740:mpeak_27062|chr16_18511825_18573434_NOMO2_NM_-|	416.332	-4.48346	1.60845	-2.78744	0.00531259	0.237221	0	0	5.95246	9.69951	0.665389	789.387	793.018	750.011	968.874	845.71	0	0.636255	-Inf	-0.111649	-Inf	NOMO2	chr16:18537687:-	-
chr16:10855419-10855485:mpeak_26806|chr16_10837642_10862903_NUBP1_NM_+|	50.0104	-3.79535	1.87472	-2.02449	0.0429197	0.432491	0	0	9.92077	2.15545	0	62.0233	99.681	81.3503	118.55	126.424	0	3.70069	-Inf	-0.427985	-Inf	NUBP1	chr16:10855472:+	-
chr15:90935098-90935177:mpeak_25965|chr15_90931472_91043226_IQGAP1_NM_+|	192.05	-1.60781	0.719353	-2.23507	0.0254125	0.370205	10.1493	1.10757	9.92077	17.2436	20.6271	389.055	379.895	396.831	301.763	393.91	1.46392	4.37448	-1.50099	0.0782862	-1.57927	IQGAP1	chr15:90935164:+	chr15_90391916_+;chr15_90391945_+
chr15:52441474-52441529:mpeak_24667|chr15_52414965_52483565_GNB5_NM_-|	198.978	-2.34397	0.943177	-2.48518	0.0129484	0.306112	2.25539	1.10757	10.9129	18.3213	8.65006	311.244	307.903	442.467	445.1	441.818	0.543159	2.84976	-2.90883	-0.517441	-2.39139	GNB5	chr15:52441475:-	-
chr14:97024189-97024239:mpeak_23321|chr14_96968712_97031291_PAPOLA_NM_+|	552.042	-4.88312	1.55659	-3.13706	0.00170653	0.162271	0	0	2.97623	4.3109	5.9885	1442.32	1136.36	1167.68	812.604	948.179	0	0.453332	-Inf	0.401457	-Inf	PAPOLA	chr14:97024242:+	chr14_96557902_+
chr14:24451951-24452091:mpeak_21105|chr14_24439082_24475094_DHRS4L2_NM_+|	140.033	-2.56436	1.0175	-2.52025	0.011727	0.298005	1.1277	2.21513	10.9129	2.15545	11.3116	304.478	296.828	291.671	264.042	215.586	0.555928	3.16089	-2.28159	0.22577	-2.50736	DHRS4L2	chr14:24452093:+	chr14_23982882_+
chr14:23500748-23500807:mpeak_21038|chr14_23495584_23504429_PSMB5_NM_-|	1834.72	-3.99523	1.65853	-2.40889	0.0160011	0.327504	0	0	0	1.07772	7.98467	3365.04	3700.38	3550.65	4482.25	3239.78	0	0.0803925	-Inf	-0.0890199	-Inf	PSMB5	chr14:23500747:-	chr14_23031539_-
chr14:105893826-105893877:mpeak_23676|chr14_105886185_105936401_MTA1_NM_+|	229.643	-5.14497	1.66295	-3.09389	0.00197554	0.16249	0	0	9.92077	6.46634	0.665389	487.165	598.086	298.615	462.344	433.168	0	1.42803	-Inf	0.447034	-Inf	MTA1	chr14:105893881:+	-
chr14:105773819-105773878:mpeak_23670|chr14_105767147_105860890_PACS2_NM_+|	129.839	-1.9367	0.932246	-2.07745	0.0377596	0.418413	1.1277	3.3227	2.97623	14.0104	9.98084	235.688	255.848	231.154	306.074	238.209	0.905405	3.47771	-2.01425	-0.0727492	-1.9415	PACS2	chr14:105773876:+	chr14_105307539_+
chr14:102605291-102605352:mpeak_23494|chr14_102548158_102606086_HSP90AA1_NM_-|	4455.87	-3.67302	1.57004	-2.33944	0.0193127	0.342033	0	0	0	7.54407	1.99617	8670.85	7917.99	9213.42	10002.4	8744.54	0	0.0341206	-Inf	-0.168205	-Inf	HSP90AA1	chr14:102605289:-	chr14_102138954_-
chr14:102233178-102233250:mpeak_23439|chr14_102228134_102391477_PPP2R5C_NM_+|	107.733	-2.71845	1.25615	-2.1641	0.0304565	0.388783	2.25539	0	14.8812	1.07772	8.65006	184.942	204.9	190.479	239.255	230.89	0.57854	3.72511	-2.86277	-0.175977	-2.68679	PPP2R5C	chr14:102233233:+	chr14_101766894_+
chr13:22069534-22069591:mpeak_19384|chr13_22067492_22178355_MICU2_NM_-|	202.305	-3.79914	1.58468	-2.39742	0.0165112	0.327504	0	0	2.97623	1.07772	3.99233	411.609	393.186	497.031	340.561	372.618	0	0.664868	-Inf	-0.00360101	-Inf	MICU2	chr13:22069540:-	-
chr13:20534464-20534515:mpeak_19282|chr13_20532809_20659961_ZMYM2_NM_+|	129.643	-4.62703	1.61203	-2.87032	0.00410056	0.214378	0	0	0	2.15545	5.9885	314.627	361.067	165.677	222.011	224.902	0	1.32943	-Inf	0.726411	-Inf	ZMYM2	chr13:20534517:+	chr13_19960375_+
chr12:69153697-69153747:mpeak_17155|chr12_69139935_69158483_SLC35E3_NM_+|	103.944	-3.57142	1.6283	-2.19334	0.0282827	0.381816	0	0	0.992077	0	5.9885	183.814	199.362	181.55	238.177	229.559	0	1.07512	-Inf	-0.175884	-Inf	SLC35E3	chr12:69153748:+	chr12_68759961_+
chr12:29495351-29495405:mpeak_15691|chr12_29494151_29534143_ERGIC2_NM_-|	233.47	-3.97529	1.60458	-2.47746	0.0132321	0.306112	0	0	0	2.15545	5.9885	527.762	430.843	398.815	432.167	536.969	0	0.595339	-Inf	0.0719537	-Inf	ERGIC2	chr12:29495352:-	chr12_29342422_-
chr12:1879520-1879610:mpeak_14849|chr12_1800246_1895109_ADIPOR2_NM_+|	794.358	-5.14117	1.67499	-3.06937	0.00214511	0.168315	0	0	0	10.7772	13.3078	1393.83	1532.87	1735.14	1601.5	1656.15	0	0.482396	-Inf	-0.185608	-Inf	ADIPOR2	chr12:1879588:+	chr12_1770406_+;chr12_1770440_+
chr12:133311595-133311661:mpeak_19195|chr12_133304029_133338474_ANKLE2_NM_-|	36.6365	-3.72114	1.74049	-2.13798	0.032518	0.397781	0	0	0	8.62179	1.33078	67.6617	64.2388	66.4692	72.2075	85.8352	0	4.43298	-Inf	-0.182378	-Inf	ANKLE2	chr12:133311604:-	-
chr12:121842537-121842588:mpeak_18746|chr12_121837885_121861188_RNF34_NM_+|	82.7943	-2.59745	1.2619	-2.05837	0.0395549	0.419972	1.1277	1.10757	1.98415	9.69951	1.99617	171.41	246.987	117.065	122.861	153.705	0.534244	3.4753	-2.02857	0.672993	-2.70157	RNF34	chr12:121842592:+	chr12_121404785_+
chr12:118473506-118473590:mpeak_18556|chr12_118472163_118499979_WSB2_NM_-|	213.392	-2.30058	1.15904	-1.98491	0.0471542	0.441685	1.1277	1.10757	4.96039	6.46634	3.99233	399.204	497.297	384.926	474.198	360.641	0.249332	1.2641	-2.20124	0.140737	-2.34197	WSB2	chr12:118473503:-	chr12_118035678_-;chr12_118035701_-;chr12_118035737_-
chr12:117352708-117352759:mpeak_18514|chr12_117348760_117465832_FBXW8_NM_+|	68.1889	-4.17615	1.58354	-2.63723	0.00835869	0.273056	0	0	5.95246	1.07772	3.99233	154.494	111.864	132.938	149.804	121.766	0	2.72492	-Inf	-0.017837	-Inf	FBXW8	chr12:117352762:+	chr12_116914954_+
chr12:116419169-116419241:mpeak_18473|chr12_116399203_116714991_MED13L_NM_-|	287.24	-1.84663	0.805155	-2.29351	0.0218186	0.354629	1.1277	8.86053	6.94454	19.399	7.31928	657.447	827.352	462.308	405.224	476.419	0.672699	2.50477	-1.16789	0.728749	-1.89664	MED13L	chr12:116419174:-	chr12_115981370_-
chr12:1010021-1010071:mpeak_14814|chr12_862088_1017640_WNK1_NM_+|	330.925	-3.70982	1.65977	-2.23514	0.0254084	0.370205	0	0	0	0	6.65389	642.787	675.615	748.026	646.634	589.535	0	0.335345	-Inf	-0.00480127	-Inf	WNK1	chr12:1010066:+	-
chr11:72466753-72466803:mpeak_13401|chr11_72466187_72504750_STARD10_NM_-|	306.145	-4.23012	1.59267	-2.656	0.00790743	0.266001	0	0	2.97623	2.15545	3.99233	578.508	789.695	599.215	661.722	423.187	0	0.541766	-Inf	0.285246	-Inf	STARD10	chr11:72466753:-	chr11_72755709_-
chr11:18369736-18369801:mpeak_11806|chr11_18343815_18387329_GTF2H1_NM_+|	84.9112	-3.36559	1.70457	-1.97445	0.0483309	0.446232	1.1277	0	0	3.23317	8.65006	230.05	165.027	102.184	155.192	183.647	0.285437	2.69447	-2.81251	0.426242	-3.23876	GTF2H1	chr11:18369805:+	chr11_18348252_+
chr10:99187149-99187200:mpeak_10182|chr10_99186026_99192111_PGAM1_NM_+|	635.592	-3.99	1.56305	-2.5527	0.0106892	0.291119	0	0	5.95246	0	3.99233	1141.23	1309.14	1187.52	1485.1	1222.99	0	0.255283	-Inf	-0.0838845	-Inf	PGAM1	chr10:99187200:+	chr10_97427442_+
chr10:79602882-79602935:mpeak_9596|chr10_79552301_79686348_DLG5_NM_-|	214.902	-4.78998	1.59518	-3.00279	0.00267518	0.172897	0	0	10.9129	1.07772	3.32695	497.314	420.875	362.108	468.81	384.595	0	1.26017	-Inf	0.18026	-Inf	DLG5	chr10:79602881:-	chr10_77843124_-
chr10:71888621-71888674:mpeak_9307|chr10_71874085_71892690_AIFM2_NM_-|	92.8384	-3.14564	1.547	-2.03338	0.0420139	0.428538	0	1.10757	3.96831	5.38862	4.65772	200.73	178.318	159.724	164.892	209.598	0.292197	2.62342	-3.07651	0.0899259	-3.16643	AIFM2	chr10:71888622:-	chr10_70128867_-
chr10:5822411-5822473:mpeak_7870|chr10_5808115_5855512_GDI2_NM_-|	998.142	-2.48046	0.798978	-3.10454	0.00190578	0.16249	1.1277	9.9681	11.9049	34.4872	32.6041	1979.11	2366.87	1732.17	2077.85	1735.33	0.255312	1.42455	-2.24681	0.233363	-2.48017	GDI2	chr10:5822419:-	chr10_5780452_-
chr10:28828778-28828901:mpeak_8485|chr10_28821516_28908465_WAC_NM_+|	305.489	-1.41367	0.608878	-2.32176	0.0202456	0.345802	5.63848	7.75296	11.9049	11.855	9.31545	713.831	860.579	466.276	426.779	540.961	0.850569	2.30648	-0.719482	0.719713	-1.43919	WAC	chr10:28828893:+	chr10_28539962_+
chr10:16858660-16858716:mpeak_8191|chr10_16635495_16859453_RSU1_NM_-|	84.4821	-3.73226	1.67801	-2.22421	0.0261341	0.371765	1.1277	0	5.95246	0	11.3116	169.154	199.362	185.518	151.959	120.435	0.30601	3.77017	-3.35136	0.271618	-3.62298	RSU1	chr10:16858658:-	chr10_16816661_-
chr1:53717776-53717921:mpeak_2304|chr1_53712728_53793821_LRP8_NM_-|	129.199	-2.38515	0.90591	-2.63288	0.00846647	0.273056	4.51078	1.10757	6.94454	3.23317	14.6386	358.607	304.581	214.289	209.078	174.997	0.847173	4.14735	-1.55811	0.733356	-2.29146	LRP8	chr1:53717870:-	chr1_53252101_-;chr1_53252199_-
chr1:53717350-53717402:mpeak_2303|chr1_53712728_53793821_LRP8_NM_-|	128.843	-1.73271	0.771012	-2.24732	0.0246195	0.369428	4.51078	2.21513	5.95246	7.54407	6.65389	358.607	304.581	214.289	209.078	174.997	1.01418	3.36758	-0.998045	0.733356	-1.7314	LRP8	chr1:53717348:-	chr1_53251678_-
chr1:46478145-46478200:mpeak_2050|chr1_46269284_46500209_MAST2_NM_+|	52.5251	-3.96839	1.6263	-2.44013	0.0146821	0.315473	0	0	0.992077	2.15545	5.32311	113.897	97.4658	94.2474	129.327	81.8429	0	2.77347	-Inf	0.0539053	-Inf	MAST2	chr1:46478198:+	chr1_46012525_+
chr1:24748817-24748988:mpeak_959|chr1_24742244_24795475_NIPAL3_NM_+|	59.7619	-3.80637	1.71122	-2.22436	0.0261245	0.371765	0	0	8.9287	0	1.33078	104.876	110.757	132.938	102.384	136.405	0	2.75995	-Inf	-0.200707	-Inf	NIPAL3	chr1:24748820:+;chr1:24748913:+;chr1:24748987:+	chr1_24422496_+
chr1:24304163-24304257:mpeak_951|chr1_24294213_24306953_SRSF10_NR_-mpeak_951|chr1_24297929_24306953_SRSF10_NM_-||	52.2741	-3.98694	2.00947	-1.98408	0.0472468	0.441685	0	0	0	0	10.6462	89.088	95.2507	118.057	95.9174	113.782	0	3.24822	-Inf	-0.245302	-Inf	SRSF10	chr1:24304175:-	chr1_23977687_-
chr1:185274116-185274179:mpeak_6067|chr1_185267420_185286461_IVNS1ABP_NM_-|	158.485	-1.31669	0.635293	-2.07258	0.0382115	0.419158	6.76617	5.53783	10.9129	15.0881	17.3001	311.244	316.764	364.092	276.975	260.167	1.95921	4.80464	-1.23031	0.0638427	-1.29416	IVNS1ABP	chr1:185274121:-	chr1_185304982_-
chr1:180468146-180468196:mpeak_5883|chr1_180257652_180472022_ACBD6_NM_-|	35.2762	-3.78942	1.73407	-2.18528	0.0288687	0.384338	0	0	1.98415	0	7.31928	56.3848	65.3464	67.4613	57.1194	97.1468	0	4.19589	-Inf	-0.280126	-Inf	ACBD6	chr1:180468144:-	-
chr1:168148860-168148922:mpeak_5514|chr1_168148082_168169140_TIPRL_NM_+|	235.776	-1.96444	0.858833	-2.28734	0.0221762	0.356207	3.38309	1.10757	7.93662	9.69951	7.31928	492.803	474.038	387.902	501.142	472.426	0.464466	1.83298	-1.88939	0.0911484	-1.98054	TIPRL	chr1:168148915:+	chr1_168179686_+
chr1:117197685-117197753:mpeak_3904|chr1_117120184_117210377_IGSF3_NM_-|	719.169	-4.29966	1.56471	-2.74789	0.00599807	0.244389	0	0	0.992077	1.07772	7.31928	1544.94	1510.72	1413.71	1379.49	1333.44	0	0.227524	-Inf	0.151482	-Inf	IGSF3	chr1:117197700:-	-
chr1:112247448-112247500:mpeak_3597|chr1_112162404_112255052_RAP1A_NM_+|	169.331	-3.71903	1.6398	-2.26797	0.0233308	0.361951	0	0	5.95246	0	3.32695	274.03	336.7	237.107	442.944	393.245	0	0.864571	-Inf	-0.228478	-Inf	RAP1A	chr1:112247499:+	chr1_111704878_+
chrX:16851068-16851118:mpeak_73907|chrX_16804554_16859550_TXLNG_NM_+|	53.0642	-3.49135	1.71207	-2.03925	0.041425	0.425693	0	0	0.992077	0	5.9885	71.0448	119.617	93.2553	115.316	124.428	0	2.09627	-Inf	-0.21954	-Inf	TXLNG	-	chrX_16832995_+
chrX:153676853-153676915:mpeak_75871|chrX_153672472_153678771_FAM50A_NM_+|	107.659	-3.30557	1.55973	-2.11933	0.0340629	0.403459	1.1277	0	6.94454	3.23317	10.6462	173.665	179.426	258.932	262.965	179.655	0.319378	2.96827	-3.62183	-0.405548	-3.21628	FAM50A	-	chrX_154448502_+;chrX_154448515_+
chr9:97220333-97220383:mpeak_71965|chr9_97136832_97221442_HIATL1_NM_+|	124.728	-3.84838	1.63975	-2.34693	0.0189289	0.33943	0	0	0.992077	2.15545	5.32311	250.348	233.696	163.693	268.353	322.714	0	1.1223	-Inf	-0.0559139	-Inf	HIATL1	-	chr9_94458107_+
chr9:139347913-139347967:mpeak_73525|chr9_139336275_139378211_SEC16A_NM_-|	309.35	-4.66389	1.54171	-3.02515	0.00248508	0.168315	0	0	6.94454	0	5.32311	670.979	703.305	582.349	555.028	569.573	0	0.718688	-Inf	0.272221	-Inf	SEC16A	-	chr9_136453451_-
chr8:41818221-41818271:mpeak_68344|chr8_41792385_41909544_KAT6A_NM_-|	119.784	-3.94198	1.73172	-2.27633	0.022826	0.358919	0	0	0	0	6.65389	288.69	240.342	269.845	185.368	206.936	0	1.00489	-Inf	0.26116	-Inf	KAT6A	-	chr8_41960645_-;chr8_41960704_-
chr8:104033592-104033699:mpeak_69677|chr8_104033247_104080879_ATP6V1C1_NM_+|	103.462	-3.9497	1.54787	-2.55171	0.0107196	0.291119	0	0	4.96039	3.23317	3.32695	195.091	171.673	209.328	218.778	228.228	0	1.75528	-Inf	-0.254617	-Inf	ATP6V1C1	-	chr8_103021418_+
chr8:103288253-103288380:mpeak_69632|chr8_103266742_103424917_UBR5_NM_-|	59.2297	-4.01514	1.60079	-2.50823	0.0121338	0.3018	0	0	4.96039	0	3.32695	119.536	134.016	108.136	127.171	95.1506	0	2.50783	-Inf	0.202771	-Inf	UBR5	-	chr8_102276099_-
chr7:8160339-8160394:mpeak_64254|chr7_8153674_8302242_ICA1_NM_-|	79.0985	-4.47717	1.58955	-2.81662	0.00485316	0.223791	0	0	0.992077	6.46634	5.32311	164.644	157.274	119.049	187.524	149.713	0	2.80121	-Inf	0.081718	-Inf	ICA1	-	chr7_8120713_-
chr7:151049895-151049945:mpeak_67322|chr7_151038846_151074132_NUB1_NM_+|	39.7779	-3.5238	1.78034	-1.97929	0.0477833	0.442809	0	0	0	0	6.65389	72.1725	75.3145	74.4058	84.0625	85.1698	0	2.73106	-Inf	-0.139189	-Inf	NUB1	-	chr7_151352882_+
chr6:86350232-86350287:mpeak_62125|chr6_86322641_86353043_SYNCRIP_NM_-|	231.248	-3.25272	1.57213	-2.06899	0.0385468	0.419399	0	0	5.95246	6.46634	1.33078	295.456	249.202	491.078	608.914	654.077	0	0.783868	-Inf	-1.10232	-Inf	SYNCRIP	-	chr6_85640519_-
chr6:30546239-30546361:mpeak_60742|chr6_30539169_30558311_ABCF1_NM_+|	345.444	-2.14078	0.842581	-2.54075	0.0110617	0.292288	2.25539	2.21513	7.93662	7.54407	11.977	674.362	727.671	671.636	730.697	618.146	0.31886	1.35897	-2.03373	0.0577851	-2.09152	ABCF1	-	chr6_30578512_+
chr6:152401897-152402080:mpeak_63505|chr6_152011630_152419866_ESR1_NM_+|	615.252	-1.48983	0.583735	-2.55223	0.0107035	0.291119	18.0431	33.227	11.9049	26.9431	12.6424	2344.48	2137.6	616.08	478.509	473.092	1.14389	3.2845	0.578777	2.1005	-1.52172	ESR1	-	chr6_152080812_+
chr6:152173063-152173131:mpeak_63491|chr6_152011630_152419866_ESR1_NM_+|	605.982	-6.32351	1.60768	-3.93332	8.37822e-05	0.0458456	0	0	0.992077	1.07772	7.98467	2344.48	2137.6	616.08	478.509	473.092	0	0.641359	-Inf	2.1005	-Inf	ESR1	-	chr6_151851977_+
chr6:142726733-142726788:mpeak_63167|chr6_142623055_142764473_ADGRG6_NM_+|	89.8909	-3.8369	1.58048	-2.42769	0.0151955	0.319907	0	0	2.97623	7.54407	1.99617	142.09	155.059	201.392	224.167	163.686	0	2.12416	-Inf	-0.402716	-Inf	ADGRG6	-	chr6_142405645_+
chr6:13799075-13799140:mpeak_60217|chr6_13791096_13814792_MCUR1_NM_-|	135.459	-2.76961	1.18347	-2.34025	0.0192709	0.342033	1.1277	1.10757	10.9129	1.07772	7.31928	266.136	313.441	221.233	278.053	254.179	0.385671	2.56281	-2.52586	0.206424	-2.73228	MCUR1	-	chr6_13798856_-
chr5:76355433-76355570:mpeak_57212|chr5_76326209_76358876_AGGF1_NM_+|	69.8196	-2.53666	1.20618	-2.10306	0.0354602	0.407298	2.25539	0	6.94454	3.23317	3.99233	163.516	163.92	152.78	93.762	107.793	0.688804	3.99905	-2.06643	0.47106	-2.53749	AGGF1	-	chr5_77059645_+
chr5:65342169-65342226:mpeak_56835|chr5_65222381_65374250_ERBB2IP_NM_+|	54.5446	-3.81511	1.63861	-2.32826	0.0198983	0.344105	0	0	0.992077	9.69951	4.65772	77.811	69.7767	108.136	106.695	167.678	0	4.0128	-Inf	-0.788959	-Inf	ERBB2IP	-	chr5_66046356_+;chr5_66046382_+
chr5:34951061-34951111:mpeak_56270|chr5_34929697_34954657_DNAJC21_NM_+|	64.6196	-3.16153	1.58097	-1.99974	0.0455288	0.439655	1.1277	0	5.95246	0	3.99233	171.41	140.661	110.121	99.1506	113.782	0.361359	3.07838	-2.5556	0.535066	-3.09067	DNAJC21	-	chr5_34951029_+
chr5:167933550-167933600:mpeak_59344|chr5_167913462_167946085_RARS_NM_+|	99.179	-3.68335	1.66333	-2.21444	0.0267985	0.377416	0	0	0.992077	0	5.9885	159.005	227.051	175.598	238.177	184.978	0	1.16585	-Inf	-0.0481872	-Inf	RARS	-	chr5_168506595_+
chr5:141524119-141524190:mpeak_58896|chr5_141488323_141531295_NDFIP1_NM_+|	318.811	-2.01569	0.956457	-2.10745	0.0350782	0.405496	3.38309	1.10757	11.9049	12.9327	3.32695	681.128	591.44	518.856	742.552	621.473	0.352881	1.49582	-2.06392	0.0197636	-2.08368	NDFIP1	-	chr5_142144599_+
chr4:48857896-48858018:mpeak_53463|chr4_48833059_48862741_OCIAD1_NM_+|	882.786	-3.91704	1.80911	-2.16517	0.0303748	0.388783	0	0	0	0	7.98467	1683.65	1878.43	1217.28	1795.49	2245.02	0	0.151864	-Inf	0.0232269	-Inf	OCIAD1	-	chr4_48855971_+
chr3:125093194-125093357:mpeak_50388|chr3_124952783_125094198_ZNF148_NM_-|	217.397	-2.1579	1.02267	-2.11007	0.0348524	0.405496	0	3.3227	5.95246	1.07772	7.31928	491.675	573.719	312.504	363.193	415.203	0.311875	1.31538	-1.52561	0.550831	-2.07644	ZNF148	-	chr3_125374440_-
chr3:122115406-122115456:mpeak_50266|chr3_122103022_122128585_FAM162A_NM_+|	289.023	-4.32514	1.67836	-2.57701	0.00996599	0.286017	0	0	0	1.07772	6.65389	569.486	815.169	375.997	558.261	563.585	0	0.516183	-Inf	0.471603	-Inf	FAM162A	-	chr3_122396609_+
chr3:10362723-10362780:mpeak_47909|chr3_10343058_10362872_SEC13_NM_-|	1553.75	-2.05274	0.973126	-2.10943	0.0349073	0.405496	1.1277	2.21513	9.92077	9.69951	8.65006	2293.73	2845.34	2670.67	3767.72	3928.46	0.0650473	0.272699	-2.49519	-0.427436	-2.06775	SEC13	-	chr3_10321053_-
chr22:28293784-28293841:mpeak_46798|chr22_28249651_28315294_PITPNB_NM_-|	209.976	-2.56662	1.18109	-2.17309	0.0297733	0.388211	2.25539	0	9.92077	6.46634	2.66156	383.417	497.297	352.187	403.069	442.484	0.256087	1.59038	-2.49328	0.141393	-2.63467	PITPNB	-	chr22_27897819_-
chr20:39750359-39750441:mpeak_44467|chr20_39657461_39751834_TOP1_NM_+|	851.996	-1.31168	0.55258	-2.37373	0.0176093	0.333219	7.89387	7.75296	12.897	20.4768	18.6309	1640.8	1965.93	1574.43	1770.7	1500.45	0.433824	1.07324	-1.14781	0.158984	-1.30679	TOP1	-	chr20_41121778_+
chr20:32664553-32664626:mpeak_44209|chr20_32581457_32667715_RALY_NM_+|	144.334	-3.95023	1.571	-2.51446	0.0119213	0.300253	0	0	4.96039	7.54407	1.33078	253.732	224.836	277.782	321.162	351.991	0	1.45491	-Inf	-0.405661	-Inf	RALY	-	chr20_34076800_+
chr2:42511204-42511254:mpeak_38835|chr2_42396477_42556873_EML4_NM_+|	107.291	-4.6895	2.03648	-2.30274	0.0212933	0.350047	0	0	0	0	11.977	195.091	283.537	174.606	182.135	225.567	0	2.05682	-Inf	0.302086	-Inf	EML4	-	chr2_42284139_+
chr2:27605034-27605104:mpeak_38428|chr2_27604672_27632550_PPM1G_NM_-|	694.684	-5.18986	1.70719	-3.04	0.00236575	0.168315	0	0	9.92077	0	15.9693	1187.46	1284.78	1395.85	1657.54	1395.32	0	0.581969	-Inf	-0.262606	-Inf	PPM1G	-	chr2_27382187_-
chr2:103244204-103244256:mpeak_40415|chr2_103236147_103324577_SLC9A2_NM_+|	81.2788	-4.59553	2.01759	-2.27774	0.0227424	0.358919	0	0	0	0	10.6462	216.518	153.952	185.518	139.026	107.128	0	2.46627	-Inf	0.364379	-Inf	SLC9A2	-	chr2_102627795_+
chr19:55780038-55780102:mpeak_37539|chr19_55774050_55791751_HSPBP1_NM_-|	197.973	-3.16256	1.59013	-1.98888	0.0467149	0.441473	0	0	4.96039	0	3.32695	270.647	317.872	546.635	385.825	450.468	0	0.59926	-Inf	-0.647604	-Inf	HSPBP1	-	chr19_55268648_-
chr18:3272878-3273046:mpeak_33466|chr18_3262110_3277762_MYL12B_NM_+|	1953.58	-3.10805	1.57001	-1.97963	0.0477451	0.442809	1.1277	0	6.94454	2.15545	5.32311	3983.02	3742.47	2963.34	3656.72	5174.73	0.0145971	0.122284	-3.09197	-0.0254885	-3.06648	MYL12B	-	chr18_3272915_+;chr18_3273000_+
chr16:3027374-3027525:mpeak_26515|chr16_3023065_3030540_PKMYT1_NM_-|	243.013	-4.43566	1.52291	-2.91261	0.00358421	0.193906	0	0	2.97623	9.69951	9.98084	341.692	324.517	592.27	547.484	601.512	0	1.30116	-Inf	-0.801128	-Inf	PKMYT1	-	chr16_2977375_-
chr16:23498027-23498086:mpeak_27279|chr16_23479021_23521815_GGA2_NM_-|	153.207	-4.04744	1.61803	-2.50146	0.0123681	0.30409	0	0	6.94454	3.23317	0	297.712	352.206	282.742	270.509	318.721	0	1.16721	-Inf	0.160938	-Inf	GGA2	-	chr16_23486709_-
chr14:64914920-64914983:mpeak_22225|chr14_64854758_64926476_MTHFD1_NM_+|	162.493	-4.22863	1.61799	-2.6135	0.00896193	0.27572	0	0	0.992077	0	6.65389	333.798	408.692	277.782	308.229	288.779	0	0.874035	-Inf	0.348398	-Inf	MTHFD1	-	chr14_64448232_+
chr14:24453964-24454113:mpeak_21107|chr14_24439082_24475094_DHRS4L2_NM_+|	139.602	-2.29954	1.0163	-2.26266	0.0236565	0.361951	0	3.3227	2.97623	6.46634	10.6462	304.478	296.828	291.671	264.042	215.586	0.552581	2.60454	-2.011	0.22577	-2.23677	DHRS4L2	-	chr14_23984904_+
chr13:96407237-96407287:mpeak_20519|chr13_96329392_96443126_DNAJC3_NM_+|	111.811	-3.80174	1.72876	-2.19911	0.0278703	0.379552	0	0	0	0	6.65389	227.795	239.234	175.598	208.001	260.833	0	1.03252	-Inf	0.120448	-Inf	DNAJC3	-	chr13_95755042_+
chr13:53008973-53009023:mpeak_20243|chr13_52990058_53024813_VPS36_NM_-|	35.4409	-3.42633	1.61815	-2.11743	0.0342232	0.403459	0	0	2.97623	4.3109	3.32695	55.2571	46.5178	57.5405	101.306	83.1736	0	4.38562	-Inf	-0.664783	-Inf	VPS36	-	chr13_52434852_-
chr11:77328061-77328135:mpeak_13598|chr11_77327740_77348851_CLNS1A_NM_-|	345.088	-4.88773	1.6066	-3.04228	0.00234791	0.168315	0	0	3.96831	0	7.98467	694.661	952.507	503.975	656.334	631.454	0	0.667107	-Inf	0.46357	-Inf	CLNS1A	-	chr11_77617016_-
chr11:68238242-68238298:mpeak_13204|chr11_68228185_68380533_PPP6R3_NM_+|	281.437	-4.30779	1.55517	-2.76999	0.00560586	0.240905	0	0	5.95246	1.07772	3.99233	522.123	652.357	494.055	585.204	549.611	0	0.676698	-Inf	0.113113	-Inf	PPP6R3	-	chr11_68470830_+
chr11:68230776-68230908:mpeak_13203|chr11_68228185_68380533_PPP6R3_NM_+|	284.126	-1.45554	0.729868	-1.99425	0.0461249	0.441196	7.89387	0	9.92077	10.7772	9.31545	522.123	652.357	494.055	585.204	549.611	0.672116	1.84259	-1.34184	0.113113	-1.45496	PPP6R3	-	chr11_68463461_+
chr11:13735663-13735714:mpeak_11692|chr11_13690205_13750158_FAR1_NM_+|	101.826	-4.45305	1.73485	-2.56682	0.0102635	0.290493	0	0	4.96039	7.54407	0	287.562	153.952	169.645	220.933	173.667	0	2.21614	-Inf	0.2311	-Inf	FAR1	-	chr11_13714177_+
chr10:6148248-6148304:mpeak_7898|chr10_6130948_6157415_RBM17_NM_+|	479.868	-4.53409	1.55328	-2.91904	0.00351112	0.193906	0	0	0.992077	5.38862	9.31545	886.369	838.428	948.426	1122.99	986.772	0	0.51325	-Inf	-0.241288	-Inf	RBM17	-	chr10_6106341_+
chr10:127503097-127503165:mpeak_11053|chr10_127477574_127511837_UROS_NM_-|	55.5548	-4.48175	1.60959	-2.78441	0.00536259	0.237221	0	0	4.96039	0	6.65389	120.663	108.542	97.2236	125.016	92.4891	0	3.69025	-Inf	0.127492	-Inf	UROS	-	chr10_125814538_-
chr1:220968215-220968268:mpeak_6946|chr1_220960038_220986633_MARC1_NM_+|	103.937	-2.97437	1.42787	-2.08308	0.0372438	0.416481	0	3.3227	2.97623	1.07772	20.6271	253.732	255.848	154.764	171.358	175.663	0.652047	4.91865	-2.30801	0.6072	-2.91521	MARC1	-	chr1_220794912_+
chr1:203818833-203818926:mpeak_6443|chr1_203764750_203821268_ZC3H11A_NM_+|	142.682	-3.55463	1.61284	-2.20395	0.0275276	0.378469	0	0	1.98415	0	5.32311	303.35	214.868	341.275	275.897	284.121	0	0.810754	-Inf	-0.213475	-Inf	ZC3H11A	-	chr1_203849806_+
chr1:200568556-200568614:mpeak_6255|chr1_200522895_200589862_KIF14_NM_-|	62.5069	-3.43497	1.63034	-2.10691	0.0351252	0.405496	0	0	4.96039	0	5.32311	111.642	65.3464	160.717	143.337	133.743	0	2.34892	-Inf	-0.721646	-Inf	KIF14	-	chr1_200599436_-
chr1:168000292-168000474:mpeak_5500|chr1_167905796_168044608_DCAF6_NM_+|	220.669	-3.74558	1.88827	-1.9836	0.0473003	0.441685	0	1.10757	0.992077	0	13.9732	484.909	570.397	295.639	445.1	394.576	0.104952	1.31816	-3.17119	0.479531	-3.65072	DCAF6	-	chr1_168031188_+
chr1:120484841-120484891:mpeak_4036|chr1_120459317_120612317_NOTCH2_NM_-|	75.8966	-2.34842	1.08512	-2.1642	0.0304487	0.388783	3.38309	0	3.96831	0	7.31928	201.858	228.159	104.168	96.9951	113.116	0.786735	3.59158	-1.15336	1.03731	-2.19067	NOTCH2	-	chr1_119942218_-
chr1:115290930-115291068:mpeak_3827|chr1_115260837_115300671_CSDE1_NM_-|	25048.4	-4.88811	1.60709	-3.04158	0.00235339	0.168315	0	0	3.96831	0	9.98084	55324.8	54891	53216	41214.3	45824	0	0.00994561	-Inf	0.237247	-Inf	CSDE1	-	chr1_114748309_-
chr12:69126449-69126524:mpeak_17150|chr12_69080730_69136134_NUP107_NM_+|	39.1143	-3.74339	1.65129	-2.26694	0.0233936	0.361951	0	0	5.95246	2.15545	5.32311	43.9801	64.2388	54.5643	99.1506	115.778	0	4.98382	-Inf	-0.731329	-Inf	NUP107	-	-
chr2:234418736-234418788:mpeak_43230|chr2_234386149_234474236_USP40_NM_-|	66.738	-3.64485	1.53004	-2.3822	0.0172097	0.330813	1.1277	0	7.93662	5.38862	4.65772	140.962	146.199	119.049	119.627	122.432	0.392705	4.97994	-3.41022	0.25439	-3.66461	USP40	-	-
chr4:44680765-44680809:mpeak_53399|chr4_44680432_44700560_GUF1_NM_+|	31.5633	-4.26387	1.93944	-2.19851	0.0279129	0.379552	0	0	0	0	7.98467	69.9171	74.2069	64.485	57.1194	41.9195	0	4.88288	-Inf	0.402772	-Inf	GUF1	-	-
chr11:46818359-46818417:mpeak_12271|chr11_46765815_46867859_CKAP5_NM_-|	51.8437	-3.21375	1.59003	-2.02119	0.0432597	0.432491	1.1277	0	1.98415	4.3109	7.98467	83.4495	120.725	88.2949	112.083	98.4776	0.55232	4.77813	-3.07756	0.0353138	-3.11287	CKAP5	-	-
chr3:31741952-31742002:mpeak_48364|chr3_31703608_32023342_OSBPL10_NM_-|	36.4779	-4.23431	1.60059	-2.64546	0.00815796	0.270002	0	0	2.97623	2.15545	3.99233	73.3002	86.3902	53.5722	76.5184	65.8735	0	4.65596	-Inf	0.289651	-Inf	OSBPL10	-	-
chr8:131172125-131172213:mpeak_70244|chr8_131067051_131455906_ASAP1_NM_-|	49.2968	-4.44614	1.61087	-2.76009	0.00577854	0.244389	0	0	4.96039	4.3109	3.99233	73.3002	120.725	88.2949	122.861	74.5236	0	4.64284	-Inf	0.0268098	-Inf	ASAP1	-	-
chr12:62931002-62931052:mpeak_16963|chr12_62860596_62986365_MON2_NM_+|	60.652	-5.02366	1.71223	-2.93398	0.00334641	0.188958	0	0	8.9287	0	2.66156	109.386	210.438	90.279	96.9951	87.8314	0	4.21302	-Inf	0.802256	-Inf	MON2	-	-
chr7:99922312-99922362:mpeak_66138|chr7_99918707_99933930_PMS2P1_NR_-|	28.8395	-3.43206	1.66626	-2.05974	0.0394232	0.419814	0	0	2.97623	0	4.65772	39.4693	57.5934	73.4137	51.7307	58.5542	0	4.15569	-Inf	-0.335389	-Inf	PMS2P1	-	-
chr17:7127339-7127391:mpeak_29722|chr17_7120443_7128275_ACADVL_NM_+|	99.3448	-2.13874	0.969503	-2.20601	0.0273832	0.377787	2.25539	1.10757	9.92077	7.54407	6.65389	163.516	207.115	187.503	192.913	214.921	0.907361	4.05128	-2.25739	-0.0987586	-2.15863	ACADVL	-	-
chr1:39791738-39791788:mpeak_1717|chr1_39549838_39951209_MACF1_NM_+|	55.2946	-4.58749	1.88794	-2.42989	0.0151036	0.319907	0	0	9.92077	1.07772	0	143.217	119.617	79.3662	87.2956	112.451	0	3.94052	-Inf	0.49827	-Inf	MACF1	-	-
chr8:61596002-61596052:mpeak_68645|chr8_61591323_61777574_CHD7_NM_+|	31.5283	-3.85598	1.86449	-2.06812	0.0386289	0.419399	0	0	0	0	6.65389	50.7463	84.175	59.5246	54.9639	59.2196	0	3.8305	-Inf	0.220415	-Inf	CHD7	-	-
chr4:143264820-143264901:mpeak_55091|chr4_142950067_143767604_INPP4B_NM_-|	43.1698	-3.55448	1.63548	-2.17336	0.0297533	0.388211	0	0	6.94454	0	3.99233	74.4279	52.0556	106.152	105.617	82.5082	0	3.71652	-Inf	-0.633265	-Inf	INPP4B	-	-
chr2:11767964-11768043:mpeak_38042|chr2_11674241_11780416_GREB1_NM_+|	144.282	-1.92666	0.758092	-2.54147	0.0110389	0.292288	7.89387	1.10757	7.93662	3.23317	7.31928	402.587	506.158	182.542	153.037	171.005	0.990535	3.64975	-0.453483	1.42804	-1.88152	GREB1	-	-
chr15:72029738-72029788:mpeak_25361|chr15_71433787_72069570_THSD4_NM_+|	47.2201	-4.84252	1.79053	-2.70451	0.00684042	0.256375	0	0	0	0	6.65389	139.834	140.661	49.6039	63.5857	71.862	0	3.59569	-Inf	1.18501	-Inf	THSD4	-	-
chr12:88912468-88912519:mpeak_17567|chr12_88890958_88974250_KITLG_NM_-|	59.9099	-5.02118	1.59421	-3.14962	0.0016348	0.162271	0	0	3.96831	0	4.65772	181.559	165.027	70.4375	91.6065	81.8429	0	3.5369	-Inf	1.09197	-Inf	KITLG	-	-
chr11:65733971-65734036:mpeak_12985|chr11_65729159_65746482_SART1_NM_+|	34.8983	-3.56147	1.65759	-2.14858	0.031668	0.39651	0	0	2.97623	0	4.65772	67.6617	57.5934	61.5088	61.4303	93.1545	0	3.53271	-Inf	-0.201823	-Inf	SART1	-	-
chr16:67574363-67574409:mpeak_28228|chr16_67562716_67580268_FAM65A_NM_+|	46.3828	-4.38734	1.91517	-2.29084	0.0219727	0.355023	0	0	0	0	7.98467	82.3218	140.661	67.4613	86.2179	79.1813	0	3.42895	-Inf	0.522429	-Inf	FAM65A	-	-
chr13:96755880-96755930:mpeak_20539|chr13_96743092_97484743_HS6ST3_NM_+|	45.301	-3.54008	1.64809	-2.14798	0.0317151	0.39651	0	0	0	7.54407	1.99617	85.7049	68.6691	98.2157	102.384	88.4968	0	3.30002	-Inf	-0.320157	-Inf	HS6ST3	-	-
chr2:136502310-136502363:mpeak_41154|chr2_136499188_136540318_UBXN4_NM_+|	85.2855	-4.97827	1.62424	-3.06499	0.00217679	0.168315	0	0	1.98415	3.23317	9.98084	196.219	173.888	148.812	121.783	196.955	0	3.2506	-Inf	0.247785	-Inf	UBXN4	-	-
chr9:102745483-102745533:mpeak_72204|chr9_102744995_102861334_ERP44_NM_-|	126.22	-3.02735	1.13558	-2.66589	0.00767845	0.263702	1.1277	3.3227	0.992077	0	7.31928	403.715	584.795	69.4454	96.9951	94.4853	0.450212	3.18533	-0.316188	2.50658	-2.82277	ERP44	-	-
chr17:60141736-60141795:mpeak_32362|chr17_60023961_60142643_MED13_NM_-|	171.81	-2.99205	1.24796	-2.39754	0.0165054	0.327504	0	2.21513	16.8653	12.9327	3.32695	298.839	303.473	303.576	347.027	429.841	0.367771	3.06586	-3.31749	-0.258078	-3.05941	MED13	-	-
chr6:33630897-33630951:mpeak_61036|chr6_33589155_33663488_ITPR3_NM_+|	77.6239	-4.5081	1.97696	-2.28032	0.0225886	0.358919	0	0	0.992077	11.855	0	146.6	186.071	105.16	146.57	178.99	0	2.98269	-Inf	0.21231	-Inf	ITPR3	-	-
chr8:117880964-117881115:mpeak_69912|chr8_117859930_117887105_RAD21_NM_-|	418.868	-2.48309	0.892126	-2.78334	0.00538027	0.237221	1.1277	12.1832	19.8415	14.0104	5.32311	1397.21	1337.94	573.421	394.447	433.168	0.486661	2.79615	-0.972363	1.55009	-2.52245	RAD21	-	-
chr21:45211271-45211320:mpeak_46151|chr21_45209417_45223392_RRP1_NM_+|	48.5748	-3.79927	1.65981	-2.28897	0.0220809	0.356071	0	0	0.992077	1.07772	5.9885	96.9818	87.4977	126.986	88.3734	77.8505	0	2.74831	-Inf	-0.0835097	-Inf	RRP1	-	-
chr4:123241114-123241232:mpeak_54816|chr4_123091757_123283185_KIAA1109_NM_+|	57.7279	-4.02112	1.95608	-2.0557	0.0398112	0.419972	0	0	0	0	8.65006	92.471	140.661	90.279	94.8397	150.378	0	2.57828	-Inf	0.0598109	-Inf	KIAA1109	-	-
chr8:93088991-93089068:mpeak_69256|chr8_92972745_93115454_RUNX1T1_NM_-|	67.1494	-3.90864	1.98098	-1.97308	0.0484865	0.446664	0	0	0	0	10.6462	117.28	111.864	133.93	148.726	149.047	0	2.4661	-Inf	-0.32882	-Inf	RUNX1T1	-	-
chr5:115469821-115469883:mpeak_58010|chr5_115420672_115628147_COMMD10_NM_+|	85.6754	-4.17396	1.75679	-2.37591	0.0175058	0.333219	0	0	10.9129	0	1.99617	173.665	138.446	142.859	165.969	222.905	0	2.42772	-Inf	-0.183683	-Inf	COMMD10	-	-
chr12:22809989-22810039:mpeak_15510|chr12_22778075_22837815_ETNK1_NM_+|	73.7051	-4.3324	1.99834	-2.168	0.030159	0.388783	0	0	0	0	9.98084	130.813	182.748	94.2474	164.892	154.37	0	2.41369	-Inf	0.185789	-Inf	ETNK1	-	-
chr6:152022613-152022848:mpeak_63481|chr6_152011630_152419866_ESR1_NM_+|	611.541	-1.89134	0.596514	-3.17067	0.0015209	0.15802	13.5323	14.3984	9.92077	20.4768	7.31928	2344.48	2137.6	616.08	478.509	473.092	0.623164	2.4059	0.151607	2.1005	-1.94889	ESR1	-	-
chr16:28928455-28928505:mpeak_27466|chr16_28916365_28936532_RABEP2_NM_-|	53.8997	-4.04706	1.78893	-2.26228	0.0236803	0.361951	0	0	0	0	6.65389	119.536	128.478	117.065	75.4407	91.8237	0	2.3402	-Inf	0.387817	-Inf	RABEP2	-	-
chr12:88542058-88542109:mpeak_17540|chr12_88536072_88588614_TMTC3_NM_+|	122.612	-3.4738	1.5955	-2.17724	0.0294624	0.388166	0	0	9.92077	1.07772	12.6424	94.7264	91.928	351.195	309.307	355.318	0	2.32727	-Inf	-1.85924	-Inf	TMTC3	-	-
chr4:153448947-153448997:mpeak_55257|chr4_153244301_153456393_FBXW7_NM_-|	56.0091	-3.72206	1.86819	-1.99234	0.0463342	0.441196	0	0	0	0	7.98467	100.365	106.326	101.192	144.415	99.8084	0	2.31161	-Inf	-0.155892	-Inf	FBXW7	-	-
chr7:5810333-5810384:mpeak_64113|chr7_5662810_5821361_RNF216_NM_-|	66.1082	-4.0188	1.96033	-2.05006	0.0403585	0.420384	0	0	0	0	8.65006	133.068	134.016	142.859	165.969	76.5197	0	2.24474	-Inf	0.0560907	-Inf	RNF216	-	-
chr13:96416096-96416215:mpeak_20522|chr13_96329392_96443126_DNAJC3_NM_+|	112.682	-3.24596	1.5992	-2.02974	0.0423832	0.430546	0	1.10757	8.9287	0	5.32311	227.795	239.234	175.598	208.001	260.833	0.237152	2.21153	-3.10072	0.120448	-3.22117	DNAJC3	-	-
chr10:76599410-76599460:mpeak_9551|chr10_76586170_76788246_KAT6B_NM_+|	90.8404	-3.35128	1.60494	-2.0881	0.0367885	0.414759	1.1277	0	0	4.3109	4.65772	226.667	265.816	129.962	108.85	167.013	0.228982	2.20997	-2.40655	0.864178	-3.27072	KAT6B	-	-
chr18:61031222-61031272:mpeak_34438|chr18_60999134_61034506_KDSR_NM_-|	63.7498	-3.80312	1.63858	-2.32099	0.0202873	0.345802	0	0	1.98415	0	6.65389	96.9818	134.016	140.875	132.56	124.428	0	2.17111	-Inf	-0.199432	-Inf	KDSR	-	-
chr10:5933019-5933163:mpeak_7881|chr10_5931534_5979072_FBXO18_NM_+|	137.786	-2.67864	1.31743	-2.03323	0.0420289	0.428538	2.25539	0	2.97623	1.07772	11.977	274.03	338.915	205.36	287.752	253.513	0.36796	2.14712	-2.24445	0.300336	-2.54478	FBXO18	-	-
chr12:121966823-121966877:mpeak_18759|chr12_121868272_122018920_KDM2B_NM_-|	75.0082	-4.47654	1.70123	-2.63136	0.00850437	0.273056	0	0	0	1.07772	6.65389	160.133	217.083	93.2553	131.482	140.397	0	2.11747	-Inf	0.631924	-Inf	KDM2B	-	-
chr1:120611242-120611292:mpeak_4044|chr1_120459317_120612317_NOTCH2_NM_-|	75.095	-4.72366	1.71823	-2.74913	0.0059753	0.244389	0	0	0	0	6.65389	201.858	228.159	104.168	96.9951	113.116	0	2.11719	-Inf	1.03731	-Inf	NOTCH2	-	-
chr15:41718859-41718930:mpeak_24138|chr15_41709301_41772778_RTF1_NM_+|	118.053	-2.76164	1.21366	-2.27546	0.0228783	0.359054	1.1277	1.10757	1.98415	2.15545	6.65389	292.073	364.389	138.891	169.203	202.944	0.340501	2.11208	-1.68668	0.946247	-2.63293	RTF1	-	-
chr5:64194095-64194223:mpeak_56782|chr5_64064744_64313985_CWC27_NM_+|	70.26	-3.52254	1.56386	-2.25246	0.0242934	0.368118	0	0	4.96039	2.15545	2.66156	111.642	116.294	156.748	158.425	149.713	0	2.10318	-Inf	-0.443284	-Inf	CWC27	-	-
chr7:156956492-156956548:mpeak_67466|chr7_156931654_157060278_UBE3C_NM_+|	194.711	-5.43165	1.53075	-3.54835	0.000387646	0.0858621	0	0	7.93662	9.69951	3.99233	435.291	457.425	312.504	386.903	333.36	0	2.09422	-Inf	0.37472	-Inf	UBE3C	-	-
chr17:58686837-58686907:mpeak_32243|chr17_58677543_58740355_PPM1D_NM_+|	241.85	-1.81492	0.810818	-2.23838	0.0251964	0.370205	4.51078	2.21513	4.96039	7.54407	13.3078	457.844	655.679	408.736	396.602	467.103	0.604021	2.02856	-1.35529	0.392496	-1.74779	PPM1D	-	-
chr6:152133217-152133277:mpeak_63486|chr6_152011630_152419866_ESR1_NM_+|	610.57	-1.88691	0.692331	-2.72545	0.00642144	0.248414	13.5323	11.0757	17.8574	2.15545	11.3116	2344.48	2137.6	616.08	478.509	473.092	0.549031	1.99814	0.236801	2.1005	-1.8637	ESR1	-	-
chr16:27277081-27277144:mpeak_27374|chr16_27236557_27280113_NSMCE1_NM_-|	118.731	-4.62335	1.63881	-2.82116	0.00478499	0.223155	0	0	0	8.62179	2.66156	278.541	292.398	194.447	248.954	161.69	0	1.86474	-Inf	0.501146	-Inf	NSMCE1	-	-
chr16:2608507-2608557:mpeak_26444|chr16_2587964_2647651_PDPK1_NM_+|	80.1929	-3.48177	1.61418	-2.15699	0.0310063	0.392169	0	0	0	7.54407	1.99617	144.345	125.155	176.59	188.602	157.697	0	1.82452	-Inf	-0.371256	-Inf	PDPK1	-	-
chr3:160141570-160141634:mpeak_51375|chr3_160117091_160151444_SMC4_NM_+|	102.449	-4.10778	1.61537	-2.54294	0.0109926	0.292288	0	0	7.93662	0	3.32695	186.07	203.792	162.701	214.467	246.194	0	1.80691	-Inf	-0.0921435	-Inf	SMC4	-	-
chr13:48921720-48921770:mpeak_20079|chr13_48877882_49054133_RB1_NM_+|	65.9677	-3.77357	1.89103	-1.99551	0.0459874	0.440449	0	0	0	0	6.65389	146.6	130.693	67.4613	169.203	139.066	0	1.77092	-Inf	0.146678	-Inf	RB1	-	-
chr6:152187299-152187396:mpeak_63492|chr6_152011630_152419866_ESR1_NM_+|	609.68	-1.82944	0.658037	-2.78015	0.00543343	0.237221	14.66	6.6454	2.97623	10.7772	11.977	2344.48	2137.6	616.08	478.509	473.092	0.475347	1.64131	0.312706	2.1005	-1.78779	ESR1	-	-
chr5:125903941-125904013:mpeak_58134|chr5_125880711_125931082_ALDH7A1_NM_-|	135.626	-4.24778	1.53825	-2.76143	0.00575494	0.244389	0	0	7.93662	2.15545	3.99233	245.838	234.804	293.655	287.752	280.129	0	1.6348	-Inf	-0.256987	-Inf	ALDH7A1	-	-
chr6:33235637-33235688:mpeak_60983|chr6_33218764_33239742_VPS52_NM_-|	67.8797	-3.60531	1.72741	-2.08713	0.0368767	0.414759	0	0	0	0	6.65389	120.663	139.553	143.851	125.016	143.059	0	1.61531	-Inf	-0.0777081	-Inf	VPS52	-	-
chr8:141888822-141888872:mpeak_70363|chr8_141669777_142011412_PTK2_NM_-|	119.011	-4.31291	1.62624	-2.65207	0.00799992	0.266924	0	0	1.98415	5.38862	2.66156	223.284	315.656	146.827	278.053	216.251	0	1.5651	-Inf	0.334467	-Inf	PTK2	-	-
chr6:111055765-111055815:mpeak_62592|chr6_110935869_111137088_CDK19_NM_-|	113.04	-4.42146	1.60462	-2.75545	0.00586115	0.244389	0	0	5.95246	0	2.66156	311.244	252.525	224.209	168.125	165.682	0	1.54369	-Inf	0.59976	-Inf	CDK19	-	-
chr11:61619621-61619671:mpeak_12581|chr11_61583674_61633109_FADS2_NM_+|	72.3411	-3.6434	1.71787	-2.12089	0.0339313	0.403051	0	0	0	0	6.65389	133.068	148.414	132.938	151.959	150.378	0	1.52866	-Inf	-0.0439233	-Inf	FADS2	-	-
chr3:9787347-9787397:mpeak_47814|chr3_9773433_9788849_BRPF1_NM_+|	74.6395	-3.72758	1.78814	-2.08461	0.037105	0.415494	0	0	0	0	6.65389	110.514	193.824	142.859	145.493	147.051	0	1.52821	-Inf	0.0682875	-Inf	BRPF1	-	-
chr8:141804811-141804863:mpeak_70357|chr8_141669777_142011412_PTK2_NM_-|	118.978	-4.38768	1.6267	-2.69729	0.00699073	0.258208	0	0	3.96831	1.07772	4.65772	223.284	315.656	146.827	278.053	216.251	0	1.51354	-Inf	0.334467	-Inf	PTK2	-	-
chr16:69674254-69674304:mpeak_28419|chr16_69599868_69730262_NFAT5_NM_+|	90.4004	-3.88316	1.76032	-2.20594	0.0273881	0.377787	0	0	0	0	7.31928	161.26	210.438	184.526	168.125	172.336	0	1.39418	-Inf	0.0868118	-Inf	NFAT5	-	-
chr6:20436630-20436680:mpeak_60346|chr6_20402136_20490398_E2F3_NM_+|	123.094	-4.16051	1.60527	-2.59178	0.00954809	0.279896	0	0	0	4.3109	5.32311	198.474	312.334	232.146	246.799	231.555	0	1.35595	-Inf	0.108909	-Inf	E2F3	-	-
chr5:179995005-179995055:mpeak_59837|chr5_179921398_180000987_CNOT6_NM_+|	101.341	-3.36612	1.62171	-2.07565	0.0379261	0.41873	0	0	0.992077	4.3109	3.99233	104.876	204.9	232.146	230.633	231.555	0	1.33874	-Inf	-0.579445	-Inf	CNOT6	-	-
chr2:11695252-11695308:mpeak_38037|chr2_11674241_11780416_GREB1_NM_+|	142.198	-5.12487	1.69522	-3.02313	0.00250176	0.168315	0	0	0	0	6.65389	402.587	506.158	182.542	153.037	171.005	0	1.31348	-Inf	1.42804	-Inf	GREB1	-	-
chr8:141685557-141685603:mpeak_70351|chr8_141669777_142011412_PTK2_NM_-|	118.837	-4.22851	1.65913	-2.54863	0.0108148	0.291119	0	0	2.97623	0	5.32311	223.284	315.656	146.827	278.053	216.251	0	1.29448	-Inf	0.334467	-Inf	PTK2	-	-
chr12:14944161-14944224:mpeak_15374|chr12_14940432_14956401_WBP11_NM_-|	189.303	-4.80514	1.54959	-3.1009	0.00192932	0.16249	0	0	2.97623	2.15545	7.98467	398.077	436.381	338.298	326.55	380.603	0	1.25461	-Inf	0.259748	-Inf	WBP11	-	-
chr10:1052942-1053055:mpeak_7767|chr10_1034348_1063014_GTPBP4_NM_+|	324.205	-3.0617	1.14001	-2.68569	0.00723806	0.258208	0	2.21513	8.9287	5.38862	7.31928	730.747	754.253	700.407	501.142	531.646	0.149167	1.24837	-2.70305	0.361992	-3.06504	GTPBP4	-	-
chr2:86433377-86433430:mpeak_39972|chr2_86426555_86437602_MRPL35_NM_+|	155.44	-4.12699	1.61895	-2.54918	0.0107976	0.291119	0	0	6.94454	4.3109	0	305.606	335.593	261.908	323.317	316.725	0	1.2479	-Inf	0.092684	-Inf	MRPL35	-	-
chr10:104934606-104934656:mpeak_10475|chr10_104849665_104953063_NT5C2_NM_-|	130.616	-3.94091	1.58803	-2.48164	0.0130778	0.306112	0	0	1.98415	4.3109	3.32695	254.859	260.278	226.194	219.856	335.356	0	1.23137	-Inf	-0.0161517	-Inf	NT5C2	-	-
chr14:103402335-103402385:mpeak_23543|chr14_103400180_103523742_CDC42BPB_NM_-|	89.3712	-3.59737	1.77518	-2.02648	0.0427159	0.431789	0	0	0	0	6.65389	164.644	180.533	129.962	189.679	222.24	0	1.22792	-Inf	-0.065679	-Inf	CDC42BPB	-	-
chr17:59793308-59793358:mpeak_32308|chr17_59761501_59940920_BRIP1_NM_-|	108.545	-3.6865	1.70546	-2.16158	0.0306505	0.390046	0	0	0.992077	0	7.31928	162.388	221.513	215.281	191.835	286.117	0	1.19893	-Inf	-0.267642	-Inf	BRIP1	-	-
chr8:141872589-141872639:mpeak_70361|chr8_141669777_142011412_PTK2_NM_-|	118.772	-4.16604	1.72698	-2.41232	0.0158513	0.327026	0	0	0.992077	0	6.65389	223.284	315.656	146.827	278.053	216.251	0	1.19257	-Inf	0.334467	-Inf	PTK2	-	-
chr16:70151946-70152059:mpeak_28465|chr16_70147528_70190377_PDPR_NM_+|	210.395	-3.50983	1.60416	-2.18795	0.0286731	0.384245	1.1277	0	2.97623	6.46634	1.33078	549.188	626.883	386.91	302.84	226.232	0.0958868	1.17615	-2.67106	0.945544	-3.6166	PDPR	-	-
chr14:59795964-59796036:mpeak_22049|chr14_59655380_59835367_DAAM1_NM_+|	151.16	-4.32834	1.58296	-2.73434	0.00625062	0.245479	0	0	3.96831	0	5.32311	289.818	382.11	297.623	244.643	288.113	0	1.11894	-Inf	0.279498	-Inf	DAAM1	-	-
chr3:47951086-47951141:mpeak_48865|chr3_47894529_48130769_MAP4_NM_-|	206.401	-4.62158	1.57118	-2.94146	0.00326665	0.188116	0	0	5.95246	0	7.31928	373.267	474.038	381.95	437.556	383.93	0	1.10282	-Inf	0.0787585	-Inf	MAP4	-	-
chr3:9691735-9691788:mpeak_47804|chr3_9691116_9743473_MTMR14_NM_+|	131.944	-3.42116	1.70827	-2.0027	0.0452091	0.439615	0	0	8.9287	0	0.665389	200.73	225.944	302.584	293.141	287.448	0	1.08632	-Inf	-0.464601	-Inf	MTMR14	-	-
chr19:56201226-56201289:mpeak_37583|chr19_56186560_56206513_EPN1_NM_+|	138.832	-3.5881	1.66092	-2.16031	0.0307489	0.390216	0	0	7.93662	0	1.99617	225.539	238.127	393.855	295.296	225.567	0	1.08589	-Inf	-0.395279	-Inf	EPN1	-	-
chr1:32604803-32604861:mpeak_1342|chr1_32573643_32636307_KPNA6_NM_+|	220.745	-5.03299	1.56187	-3.22242	0.00127111	0.145572	0	0	3.96831	0	7.31928	560.465	571.504	359.132	329.783	375.279	0	1.06067	-Inf	0.674034	-Inf	KPNA6	-	-
chr10:22189831-22189881:mpeak_8309|chr10_22045684_22292650_DNAJC1_NM_-|	109.162	-3.56285	1.68341	-2.11645	0.0343068	0.403459	0	0	0	0	6.65389	201.858	207.115	237.107	208.001	230.89	0	0.984307	-Inf	-0.140051	-Inf	DNAJC1	-	-
chr15:50857679-50857729:mpeak_24538|chr15_50854005_50979012_TRPM7_NM_-|	209.01	-3.25057	1.60018	-2.03137	0.0422171	0.429923	0	1.10757	1.98415	3.23317	4.65772	444.312	612.484	275.798	292.063	454.461	0.104804	0.965944	-2.57143	0.632811	-3.20424	TRPM7	-	-
chr7:74173385-74173447:mpeak_65485|chr7_74071990_74173877_GTF2I_NM_+|	207.811	-4.34481	1.5868	-2.73809	0.00617965	0.245037	0	0	7.93662	2.15545	0.665389	453.334	493.975	394.847	354.571	370.622	0	0.960453	-Inf	0.343319	-Inf	GTF2I	-	-
chr11:17156361-17156411:mpeak_11764|chr11_17111467_17191354_PIK3C2A_NM_-|	195.479	-3.84802	1.61447	-2.38346	0.017151	0.330813	0	0	5.95246	5.38862	0	360.863	356.636	431.554	453.722	340.679	0	0.925082	-Inf	-0.187894	-Inf	PIK3C2A	-	-
chr1:151150485-151150628:mpeak_4659|chr1_151149540_151162689_VPS72_NM_-|	226.614	-4.28879	1.62793	-2.63451	0.00842586	0.273056	0	0	7.93662	0	3.99233	363.118	534.955	341.275	515.152	499.707	0	0.87963	-Inf	-0.00963316	-Inf	VPS72	-	-
chr3:160239815-160239870:mpeak_51406|chr3_160219990_160283376_KPNA4_NM_-|	248.347	-4.22475	1.55055	-2.72468	0.00643629	0.248414	0	0	8.9287	2.15545	2.66156	471.377	435.274	560.524	488.209	514.346	0	0.879399	-Inf	-0.200809	-Inf	KPNA4	-	-
chr3:133293075-133293136:mpeak_50670|chr3_133292433_133306002_CDV3_NM_+|	789.059	-2.27131	0.871453	-2.60635	0.00915142	0.278041	3.38309	2.21513	9.92077	20.4768	5.32311	1626.14	1840.78	1410.73	1598.26	1373.36	0.161476	0.8151	-2.08876	0.246905	-2.33566	CDV3	-	-
chr2:165679858-165679914:mpeak_41609|chr2_165542542_165698678_COBLL1_NM_-|	146.977	-3.68414	1.76596	-2.08619	0.0369614	0.414759	0	0	0	0	7.31928	260.498	297.935	260.916	378.281	264.825	0	0.809635	-Inf	-0.110012	-Inf	COBLL1	-	-
chr1:21094081-21094161:mpeak_790|chr1_21071584_21113181_HP1BP3_NM_-|	188.044	-4.07992	1.59757	-2.55382	0.0106549	0.291119	0	0	1.98415	1.07772	5.32311	338.309	461.855	289.687	392.291	389.918	0	0.782258	-Inf	0.163165	-Inf	HP1BP3	-	-
chr14:31143162-31143212:mpeak_21230|chr14_31091459_31204791_SCFD1_NM_+|	154.846	-3.87925	1.74219	-2.22665	0.0259708	0.371765	0	0	0	0	6.65389	331.543	337.808	228.178	376.126	268.152	0	0.762663	-Inf	0.202643	-Inf	SCFD1	-	-
chr6:152400493-152400585:mpeak_63503|chr6_152011630_152419866_ESR1_NM_+|	607.288	-1.71583	0.739455	-2.32039	0.0203198	0.345802	5.63848	5.53783	5.95246	0	5.9885	2344.48	2137.6	616.08	478.509	473.092	0.249355	0.761696	0.489487	2.1005	-1.61101	ESR1	-	-
chr16:74688302-74688352:mpeak_28663|chr16_74657969_74700779_RFWD3_NM_-|	186.201	-3.94822	1.79032	-2.20532	0.0274319	0.377787	0	0	0	0	7.98467	359.735	396.509	322.425	452.644	322.714	0	0.727345	-Inf	0.0472928	-Inf	RFWD3	-	-
chr9:108521043-108521116:mpeak_72325|chr9_108456805_108536145_TMEM38B_NM_+|	163.454	-3.59148	1.6052	-2.2374	0.0252602	0.370205	0	0	1.98415	0	5.32311	340.564	262.493	370.045	288.83	365.299	0	0.713479	-Inf	-0.179131	-Inf	TMEM38B	-	-
chr14:68123126-68123293:mpeak_22364|chr14_68118198_68141602_VTI1B_NM_-|	723.472	-1.71057	0.768385	-2.22619	0.0260014	0.371765	5.63848	1.10757	8.9287	10.7772	6.65389	1676.88	1643.63	1282.76	1521.75	1076.6	0.203163	0.679184	-1.38126	0.359902	-1.74117	VTI1B	-	-
chr10:21398482-21398532:mpeak_8278|chr10_21074852_21463116_NEBL_NM_-|	184.135	-3.67802	1.70796	-2.15346	0.0312826	0.393815	0	0	0	0	7.31928	330.415	361.067	371.037	355.649	415.868	0	0.640607	-Inf	-0.139537	-Inf	NEBL	-	-
chr14:95566977-95567027:mpeak_23254|chr14_95557000_95624347_DICER1_NM_-|	231.802	-4.40231	1.74287	-2.52589	0.0115405	0.295884	0	0	0	0	7.31928	464.611	696.659	366.077	398.758	384.595	0	0.636775	-Inf	0.599748	-Inf	DICER1	-	-
chr1:109910022-109910075:mpeak_3483|chr1_109856679_109940563_SORT1_NM_-|	228.022	-3.92624	1.58088	-2.48358	0.0130071	0.306112	0	0	2.97623	0	5.32311	513.102	397.616	427.585	433.245	500.373	0	0.609707	-Inf	0.00515639	-Inf	SORT1	-	-
chr2:9556833-9556883:mpeak_37905|chr2_9547034_9563643_ITGB1BP1_NM_-|	176.606	-3.55246	1.67703	-2.1183	0.0341494	0.403459	0	0	0	0	6.65389	327.032	332.27	416.673	356.727	326.706	0	0.604841	-Inf	-0.153668	-Inf	ITGB1BP1	-	-
chr18:43669269-43669319:mpeak_34142|chr18_43664329_43684199_ATP5A1_NM_-|	374.117	-3.1061	1.5794	-1.96663	0.0492259	0.448409	0	1.10757	0	6.46634	5.9885	766.833	827.352	575.405	860.024	697.993	0.0694754	0.583797	-2.90628	0.164613	-3.07089	ATP5A1	-	-
chr6:36510770-36510820:mpeak_61193|chr6_36463691_36515293_STK38_NM_-|	262.963	-4.36273	1.75618	-2.48422	0.0129835	0.306112	0	0	0	0	7.98467	560.465	688.906	505.959	436.478	429.841	0	0.581855	-Inf	0.449591	-Inf	STK38	-	-
chr1:117493391-117493442:mpeak_3911|chr1_117452544_117529422_PTGFRN_NM_+|	325.394	-4.13042	1.57716	-2.6189	0.00882141	0.27572	0	0	0	7.54407	3.32695	602.189	714.38	573.421	630.468	722.613	0	0.564288	-Inf	0.035763	-Inf	PTGFRN	-	-
chr17:58460767-58460827:mpeak_32217|chr17_58256789_58469586_USP32_NM_-|	409.99	-3.33198	1.60228	-2.07952	0.0375697	0.417283	0	1.10757	1.98415	2.15545	8.65006	822.09	994.595	612.112	973.185	684.02	0.0609663	0.563591	-2.94455	0.264013	-3.20856	USP32	-	-
chr4:166332137-166332187:mpeak_55449|chr4_166300096_166418663_CPE_NM_+|	287.194	-3.5054	1.60058	-2.19008	0.0285181	0.383732	0	0	3.96831	6.46634	0	487.165	481.791	567.468	724.23	600.846	0	0.551356	-Inf	-0.380862	-Inf	CPE	-	-
chr17:38798195-38798246:mpeak_31090|chr17_38785245_38804103_SMARCE1_NM_-|	348.064	-4.26707	1.55428	-2.74537	0.00604421	0.244389	0	0	1.98415	6.46634	1.99617	742.024	816.276	597.231	677.888	636.777	0	0.546403	-Inf	0.289931	-Inf	SMARCE1	-	-
chr2:216977761-216977863:mpeak_42788|chr2_216974019_217069910_XRCC5_NM_+|	660.672	-2.12831	1.00077	-2.12667	0.0334479	0.402552	3.38309	0	8.9287	5.38862	5.9885	1203.25	1569.42	998.03	1401.04	1411.29	0.122015	0.532911	-2.00052	0.126312	-2.12683	XRCC5	-	-
chr2:44153028-44153078:mpeak_38882|chr2_44115795_44223144_LRPPRC_NM_-|	231.692	-3.93709	1.77242	-2.22131	0.0263299	0.373257	0	0	0	0	6.65389	420.63	610.269	327.386	389.058	562.919	0	0.520094	-Inf	0.273441	-Inf	LRPPRC	-	-
chr1:151186325-151186375:mpeak_4664|chr1_151171020_151220338_PIP5K1A_NM_+|	255.28	-3.63705	1.78459	-2.03804	0.0415464	0.425693	0	0	0	0	7.98467	413.864	493.975	439.49	649.867	547.615	0	0.48777	-Inf	-0.26556	-Inf	PIP5K1A	-	-
chr6:152200659-152200717:mpeak_63495|chr6_152011630_152419866_ESR1_NM_+|	606.305	-2.18817	1.05337	-2.07731	0.0377734	0.418413	5.63848	0	0.992077	0	6.65389	2344.48	2137.6	616.08	478.509	473.092	0.1258	0.487725	0.145569	2.1005	-1.95493	ESR1	-	-
chr4:1974045-1974095:mpeak_52602|chr4_1873122_1980364_WHSC1_NM_+|	238.553	-3.56572	1.74559	-2.0427	0.0410822	0.424688	0	0	0	0	6.65389	474.76	434.166	344.251	524.851	600.846	0	0.452661	-Inf	-0.108569	-Inf	WHSC1	-	-
chr6:152402639-152402738:mpeak_63506|chr6_152011630_152419866_ESR1_NM_+|	606.091	-2.37455	1.08259	-2.1934	0.0282788	0.381816	3.38309	1.10757	0	0	6.65389	2344.48	2137.6	616.08	478.509	473.092	0.100191	0.424442	0.0176896	2.1005	-2.08281	ESR1	-	-
chr12:121002951-121003001:mpeak_18686|chr12_120972131_121014392_RNF10_NM_+|	656.675	-3.26509	1.55105	-2.10508	0.0352842	0.406189	1.1277	0	3.96831	3.23317	5.32311	1316.02	1654.7	964.299	1338.53	1279.54	0.0379603	0.349617	-2.88835	0.314861	-3.20321	RNF10	-	-
chr10:126753136-126753186:mpeak_11030|chr10_126678267_126849624_CTBP2_NM_-|	357.909	-4.05219	1.63358	-2.48056	0.0131177	0.306112	0	0	0	0	6.65389	790.515	833.997	626.993	668.189	652.747	0	0.341588	-Inf	0.323028	-Inf	CTBP2	-	-
chr17:75484796-75484848:mpeak_33038|chr17_75277491_75494604_SEPT9_NM_+|	705.379	-4.35346	1.56792	-2.77658	0.00549339	0.237315	0	0	8.9287	3.23317	2.66156	1233.7	1378.92	1351.21	1814.89	1260.25	0	0.334891	-Inf	-0.175656	-Inf	SEPT9	-	-
chr20:46397110-46397220:mpeak_44792|chr20_46287136_46415360_SULF2_NM_-|	384.84	-3.54705	1.60405	-2.21131	0.0270147	0.377745	0	0	3.96831	0	3.99233	666.468	714.38	747.034	655.256	1057.3	0	0.323657	-Inf	-0.247903	-Inf	SULF2	-	-
chr20:47301628-47301678:mpeak_44813|chr20_47242465_47444420_PREX1_NM_-|	711.494	-5.11443	1.57065	-3.25626	0.00112892	0.142556	0	0	4.96039	0	4.65772	2082.85	2040.14	899.814	884.811	1197.7	0	0.322504	-Inf	1.05222	-Inf	PREX1	-	-
chr20:56275008-56275136:mpeak_45168|chr20_56227654_56286592_PMEPA1_NM_-|	646.578	-3.21657	1.60596	-2.0029	0.045188	0.439615	0	0	3.96831	1.07772	11.3116	533.4	601.409	1623.04	1598.26	2093.31	0	0.307786	-Inf	-1.64255	-Inf	PMEPA1	-	-
chr8:95690622-95690672:mpeak_69328|chr8_95653363_95718152_ESRP1_NM_+|	424.838	-3.75952	1.57461	-2.38758	0.0169595	0.330813	0	0	0	3.23317	4.65772	810.813	857.256	822.432	986.117	763.867	0	0.30675	-Inf	-0.0399821	-Inf	ESRP1	-	-
chr10:70096012-70096062:mpeak_9177|chr10_70091767_70101734_HNRNPH3_NM_+mpeak_9177|chr10_70091767_70101734_HNRNPH3_NM_+||	433.277	-4.01671	1.74265	-2.30494	0.0211699	0.350047	0	0	0	0	7.31928	954.031	932.571	664.692	741.474	1032.68	0	0.300112	-Inf	0.214551	-Inf	HNRNPH3	-	-
chr10:71117172-71117222:mpeak_9282|chr10_71029755_71160746_HK1_NM_+|	434.935	-3.89775	1.68797	-2.30913	0.0209363	0.34999	0	0	0	0	6.65389	857.049	1024.5	798.622	973.185	689.343	0	0.270357	-Inf	0.19755	-Inf	HK1	-	-
chr11:47520999-47521052:mpeak_12325|chr11_47493654_47574792_CELF1_NM_-|	822.07	-3.98182	1.62942	-2.4437	0.0145376	0.313188	0	0	7.93662	5.38862	0	1261.89	1603.76	1640.9	1845.06	1855.77	0	0.249456	-Inf	-0.313483	-Inf	CELF1	-	-
chr16:9014207-9014257:mpeak_26756|chr16_8987961_9057341_USP7_NM_-|	677.794	-3.66567	1.59317	-2.30086	0.0213994	0.350489	0	0	4.96039	5.38862	0	1061.16	1408.82	1394.86	1449.54	1453.21	0	0.240808	-Inf	-0.214069	-Inf	USP7	-	-
chr21:27344420-27344470:mpeak_45610|chr21_27254082_27543446_APP_NM_-|	506.545	-3.91638	1.65377	-2.36816	0.0178768	0.334243	0	0	0	0	6.65389	1062.29	1130.83	918.664	861.101	1085.92	0	0.232192	-Inf	0.199066	-Inf	APP	-	-
chr1:154192812-154192863:mpeak_4864|chr1_154180124_154193273_C1orf43_NM_-|	1060.68	-3.09488	1.53569	-2.0153	0.0438728	0.434922	1.1277	0	8.9287	1.07772	3.99233	2162.92	2134.28	1949.43	2278.31	2066.7	0.0262426	0.222399	-3.04889	0.0342819	-3.08317	C1orf43	-	-
chr17:75339959-75340009:mpeak_33036|chr17_75277491_75494604_SEPT9_NM_+|	704.828	-3.91333	1.84499	-2.12106	0.033917	0.403051	0	0	0	0	9.31545	1233.7	1378.92	1351.21	1814.89	1260.25	0	0.210455	-Inf	-0.175656	-Inf	SEPT9	-	-
chr3:62308330-62308381:mpeak_49346|chr3_62304647_62318929_C3orf14_NM_+|	1010.19	-4.21651	1.6251	-2.59462	0.00946952	0.279589	0	0	0	9.69951	1.99617	1997.15	2173.05	1777.8	2280.46	1861.76	0	0.197561	-Inf	0.0794738	-Inf	C3orf14	-	-
chr17:57973969-57974092:mpeak_32150|chr17_57970406_58023911_RPS6KB1_NM_+|	1670.29	-3.13912	1.53782	-2.04128	0.0412234	0.425078	0	1.10757	10.9129	5.38862	2.66156	2980.5	2937.27	3930.61	3226.71	3607.74	0.018716	0.176154	-3.51276	-0.278269	-3.23449	RPS6KB1	-	-
chr1:113194094-113194155:mpeak_3637|chr1_113162074_113212613_CAPZA1_NM_+|	1102.17	-3.51217	1.56089	-2.2501	0.0244425	0.368118	0	0	5.95246	1.07772	3.99233	1539.3	1693.47	2120.07	2666.29	2991.59	0	0.141715	-Inf	-0.681655	-Inf	CAPZA1	-	-
chr14:21727280-21727415:mpeak_20934|chr14_21679465_21737638_HNRNPC_NM_-mpeak_20934|chr14_21679465_21737638_HNRNPC_NM_-||	1804.01	-4.09947	1.55607	-2.63451	0.00842597	0.273056	0	0	1.98415	6.46634	2.66156	3167.7	4043.72	3275.84	3762.33	3779.41	0	0.102722	-Inf	-6.01193e-05	-Inf	HNRNPC	-	-
chr2:55250597-55250692:mpeak_39109|chr2_55200334_55277734_RTN4_NM_-|	1395.61	-4.30813	1.60109	-2.69075	0.0071291	0.258208	0	0	0.992077	0	5.9885	3243.25	3640.57	1995.07	2439.97	2630.28	0	0.0988006	-Inf	0.547418	-Inf	RTN4	-	-
chr20:46173251-46173303:mpeak_44736|chr20_46130600_46282149_NCOA3_NM_+|	1595.19	-4.16083	1.62367	-2.56262	0.0103886	0.29109	0	0	0	2.15545	5.9885	3150.78	3941.83	2584.36	2487.39	3779.41	0	0.09201	-Inf	0.265413	-Inf	NCOA3	-	-
chr14:102598007-102598057:mpeak_23492|chr14_102548158_102606086_HSP90AA1_NM_-|	4455.71	-3.76269	1.71263	-2.19702	0.0280189	0.380131	0	0	0	0	7.98467	8670.85	7917.99	9213.42	10002.4	8744.54	0	0.0285571	-Inf	-0.168205	-Inf	HSP90AA1	-	-
chr5:137765512-137765650:mpeak_58589|chr5_137688284_137771308_KDM3B_NM_+|	25.0774	1.83085	0.93463	1.95891	0.0501237	0.452893	28.1924	7.75296	4.96039	6.46634	14.6386	31.5755	19.9362	38.691	50.653	47.908	69.781	18.9908	1.04864	-0.828894	1.87753	KDM3B	-	-
chr12:123239616-123239666:mpeak_18872|chr12_123237367_123253580_DENR_NM_+mpeak_18872|chr12_123237367_123253580_DENR_NM_+||	398.028	-3.24536	1.65694	-1.95865	0.0501538	0.452893	0	0	0	0	6.65389	703.682	587.01	906.759	962.407	813.771	0	0.248008	-Inf	-0.470706	-Inf	DENR	-	-
chr6:99864218-99864275:mpeak_62364|chr6_99849506_99873207_PNISR_NM_-|	54.3919	-1.54628	0.789533	-1.95848	0.0501736	0.452893	9.02157	1.10757	15.8732	16.1659	7.98467	103.748	108.542	77.382	105.617	98.4776	4.77138	14.2192	-1.39738	0.177981	-1.57536	PNISR	-	-
chr9:109633662-109633712:mpeak_72338|chr9_109625377_109773103_ZNF462_NM_+|	18.02	-4.03911	2.06244	-1.95841	0.0501817	0.452893	0	0	0	0	6.65389	50.7463	32.1194	27.7782	18.3213	44.5811	0	7.33773	-Inf	0.454945	-Inf	ZNF462	-	-
chr14:24424660-24424760:mpeak_21101|chr14_24422943_24437965_DHRS4_NM_+|	144.882	-1.79325	0.915909	-1.95789	0.0502434	0.452893	5.63848	1.10757	12.897	2.15545	14.6386	338.309	270.246	299.607	272.664	231.555	1.10854	3.69371	-1.55295	0.183465	-1.73642	DHRS4	chr14:24424711:+;chr14:24424752:+	chr14_23955542_+
chr7:107818741-107818805:mpeak_66456|chr7_107790592_108096841_NRCAM_NM_-mpeak_66456|chr7_107790592_108096841_NRCAM_NM_-||	57.2253	-3.29629	1.68376	-1.95769	0.0502663	0.452893	1.1277	0	3.96831	1.07772	8.65006	100.365	138.446	146.827	64.6634	107.128	0.472213	4.29859	-3.01735	0.169	-3.18635	NRCAM	-	-
chr4:3105544-3105604:mpeak_52687|chr4_3076236_3241572_HTT_NM_+|	130.477	0.9877	0.504646	1.95721	0.0503223	0.4529	41.7247	27.6892	16.8653	14.0104	10.6462	237.944	313.441	195.439	218.778	228.228	12.589	6.46311	1.32631	0.364448	0.961865	HTT	-	-
chr8:103299721-103299800:mpeak_69634|chr8_103266742_103424917_UBR5_NM_-|	59.6511	-3.11039	1.591	-1.95499	0.0505847	0.454192	1.1277	0	2.97623	1.07772	7.31928	119.536	134.016	108.136	127.171	95.1506	0.44476	3.44165	-2.74923	0.202771	-2.952	UBR5	-	-
chr3:127381775-127381832:mpeak_50440|chr3_127348001_127391110_PODXL2_NM_+|	5.83975	-3.94425	2.01765	-1.95487	0.0505982	0.454192	0	1.10757	0	5.38862	3.32695	20.2985	12.1832	5.95246	2.15545	7.98467	3.40981	54.1589	-2.39124	1.5982	-3.98943	PODXL2	chr3:127381827:+	chr3_127662999_+
chr11:85425612-85425662:mpeak_13750|chr11_85406383_85522202_SYTL2_NM_-|	262.513	-3.16326	1.61875	-1.95413	0.0506855	0.454192	0	0	0	1.07772	6.65389	402.587	352.206	606.159	551.795	704.647	0	0.415098	-Inf	-0.718202	-Inf	SYTL2	chr11:85425610:-	chr11_85714569_-
chr15:50757420-50757592:mpeak_24522|chr15_50716573_50791099_USP8_NM_+|	79.8282	-1.66296	0.851089	-1.95392	0.0507111	0.454192	4.51078	6.6454	2.97623	16.1659	10.6462	180.431	231.481	80.3583	129.327	135.739	2.70838	8.62368	-0.831941	0.838931	-1.67087	USP8	chr15:50757505:+	chr15_50465305_+
chr1:217753368-217753430:mpeak_6854|chr1_217604707_217804444_GPATCH2_NM_-|	18.6296	2.36771	1.21219	1.95324	0.0507909	0.454192	5.63848	6.6454	0.992077	3.23317	0	42.8524	24.3665	24.8019	25.8654	51.9004	18.2744	4.11947	2.12462	-0.0246746	2.14929	GPATCH2	chr1:217753374:-	chr1_217580037_-
chr1:91486442-91486553:mpeak_2972|chr1_91382547_91487812_ZNF644_NM_-|	6.7934	-3.95006	2.02237	-1.95318	0.0507978	0.454192	0	0	2.97623	8.62179	2.66156	7.89387	8.86053	2.97623	22.6322	11.3116	0	38.6229	-Inf	-0.554902	-Inf	ZNF644	chr1:91486442:-;chr1:91486500:-	chr1_91020887_-;chr1_91020939_-
chr2:36810490-36810540:mpeak_38657|chr2_36780322_36825332_FEZ2_NM_-|	41.4448	-2.33014	1.19337	-1.95257	0.0508705	0.454347	6.76617	0	19.8415	5.38862	4.65772	89.088	112.972	36.7069	62.508	76.5197	3.3486	17.0074	-1.55819	0.786346	-2.34453	FEZ2	-	-
chr19:12721257-12721343:mpeak_35384|chr19_12692538_12721623_ZNF490_NM_-|	3.7711	-4.17108	2.13762	-1.95128	0.0510243	0.455019	2.25539	2.21513	0.992077	8.62179	7.31928	2.25539	11.0757	2.97623	0	0	33.5347	568.946	-1.33637	2.74819	-4.08457	ZNF490	chr19:12721255:-	chr19_12610443_-
chr4:129880835-129880936:mpeak_54933|chr4_129805694_130014762_SCLT1_NM_-|	3.9142	4.15674	2.13057	1.951	0.0510566	0.455019	6.76617	6.6454	0.992077	5.38862	9.98084	0	0	1.98415	5.38862	1.99617	#DIV/0!	174.636	0.298133	-Inf	Inf	SCLT1	-	chr4_128959760_-
chr2:207008806-207008861:mpeak_42636|chr2_206989000_207024243_NDUFS1_NM_-|	99.5493	1.51246	0.775429	1.95049	0.051118	0.455072	3.38309	6.6454	3.96831	2.15545	3.99233	110.514	136.231	269.845	211.234	247.525	4.06431	1.38842	0.572414	-0.977152	1.54957	NDUFS1	-	-
chr17:8400591-8400641:mpeak_29907|chr17_8379266_8534079_MYH10_NM_-|	38.8968	-3.90573	2.00297	-1.94997	0.05118	0.455131	0	0	0	0	7.31928	64.2787	99.681	44.6435	113.161	59.885	0	3.36226	-Inf	0.176031	-Inf	MYH10	-	-
chr9:98657264-98657314:mpeak_72012|chr9_98637899_98774506_ERCC6L2_NM_+|	17.9654	-3.93189	2.01792	-1.94849	0.0513563	0.455944	0	0	0	0	7.31928	37.214	37.6573	43.6514	25.8654	27.9463	0	7.50979	-Inf	0.204517	-Inf	ERCC6L2	-	-
chr18:29991839-29991988:mpeak_33980|chr18_29848731_30050447_GAREM_NM_-|	34.8133	-1.37996	0.708403	-1.94799	0.0514162	0.455944	4.51078	5.53783	9.92077	15.0881	9.31545	68.7894	64.2388	56.5484	54.9639	59.2196	7.55374	20.1042	-1.18727	0.224962	-1.41224	GAREM	chr18:29991843:-	chr18_32411877_-
chr3:52613065-52613115:mpeak_49113|chr3_52582251_52719866_PBRM1_NM_-|	54.8602	-3.21299	1.64967	-1.94766	0.0514556	0.455944	0	0	4.96039	3.23317	2.66156	78.9387	63.1313	78.3741	178.902	138.401	0	2.74343	-Inf	-0.89276	-Inf	PBRM1	-	-
chr2:162017766-162017953:mpeak_41536|chr2_161993465_162091852_TANK_NM_+|	13.96	-1.80221	0.925469	-1.94734	0.0514937	0.455944	5.63848	6.6454	10.9129	17.2436	24.6194	13.5323	19.9362	9.92077	11.855	19.2963	36.7028	128.496	-1.51815	0.289612	-1.80776	TANK	-	chr2_161161338_+
chr19:53150043-53150151:mpeak_37344|chr19_53118050_53193834_ZNF83_NM_-|	12.4395	-3.41713	1.75636	-1.94557	0.0517058	0.457329	2.25539	0	4.96039	0	11.977	39.4693	21.0438	9.92077	24.7876	9.98084	3.72711	37.9004	-2.3238	1.02228	-3.34608	ZNF83	-	-
chr8:87500794-87500876:mpeak_69136|chr8_87486587_87521009_RMDN1_NM_-|	128.081	-1.47331	0.758334	-1.94282	0.0520376	0.459167	5.63848	1.10757	10.9129	11.855	7.31928	233.433	250.31	239.091	285.597	235.548	1.39455	3.9576	-1.57207	-0.0672426	-1.50483	RMDN1	-	-
chr2:106363167-106363217:mpeak_40463|chr2_106361519_106509437_NCK2_NM_+|	20.8314	-4.18294	2.15337	-1.94251	0.0520756	0.459167	0	0	0	0	7.98467	37.214	55.3783	41.6673	16.1659	49.9042	0	7.41124	-Inf	0.366409	-Inf	NCK2	-	-
chr14:75912185-75912259:mpeak_22747|chr14_75894508_75935992_JDP2_NM_+|	59.3604	-2.06364	1.06241	-1.94242	0.0520866	0.459167	2.25539	2.21513	14.8812	4.3109	3.99233	110.514	145.091	138.891	91.6065	79.8467	1.74899	7.47054	-1.78968	0.305012	-2.09469	JDP2	chr14:75912238:+	chr14_75445532_+
chr8:68071217-68071307:mpeak_68808|chr8_67976602_68107616_CSPP1_NM_+|	5.48761	3.97436	2.04701	1.94154	0.0521929	0.459167	9.02157	8.86053	8.9287	10.7772	7.98467	0	0	1.98415	0	7.31928	#DIV/0!	297.638	-0.0459182	-Inf	Inf	CSPP1	-	-
chr7:33056993-33057096:mpeak_64753|chr7_33054443_33102409_NT5C3A_NM_-|	214.007	-1.91166	0.984671	-1.94142	0.0522077	0.459167	1.1277	2.21513	1.98415	8.62179	7.31928	390.183	477.361	435.522	391.214	424.518	0.385321	1.43258	-1.83789	0.0565963	-1.89448	NT5C3A	chr7:33057008:-;chr7:33057037:-	-
chr4:52740435-52740557:mpeak_53477|chr4_52709165_52779694_DCUN1D4_NM_+|	44.4667	1.24106	0.639366	1.94107	0.0522493	0.459167	13.5323	22.1513	15.8732	5.38862	11.3116	57.5125	60.9161	99.2077	77.5961	81.1775	30.131	12.6263	0.716529	-0.538286	1.25482	DCUN1D4	-	-
chr1:120534834-120534885:mpeak_4039|chr1_120459317_120612317_NOTCH2_NM_-|	76.0593	-1.80707	0.931451	-1.94006	0.0523722	0.459188	1.1277	3.3227	5.95246	3.23317	2.66156	201.858	228.159	104.168	96.9951	113.116	1.03494	3.76964	-0.827577	1.03731	-1.86488	NOTCH2	-	-
chr10:71124526-71124646:mpeak_9283|chr10_71029755_71160746_HK1_NM_+|	437.629	-1.56506	0.806806	-1.93982	0.0524011	0.459188	5.63848	1.10757	12.897	8.62179	5.32311	857.049	1024.5	798.622	973.185	689.343	0.358537	1.09062	-1.40741	0.19755	-1.60496	HK1	-	chr10_69364821_+
chr4:143709597-143709647:mpeak_55104|chr4_142950067_143767604_INPP4B_NM_-|	42.8722	-3.16063	1.62946	-1.93967	0.0524195	0.459188	0	0	3.96831	0	3.99233	74.4279	52.0556	106.152	105.617	82.5082	0	2.70515	-Inf	-0.633265	-Inf	INPP4B	chr4:143709595:-	chr4_142788444_-
chr4:17811833-17811930:mpeak_52999|chr4_17806394_17812381_DCAF16_NM_-|	40.4404	-2.01007	1.03674	-1.93884	0.0525213	0.459589	2.25539	2.21513	1.98415	5.38862	4.65772	108.259	122.94	40.6752	75.4407	40.5887	1.93363	7.67718	-0.843218	1.14605	-1.98927	DCAF16	-	-
chr20:46262739-46262937:mpeak_44746|chr20_46130600_46282149_NCOA3_NM_+|	1600.16	-1.75276	0.904278	-1.93829	0.0525874	0.459678	6.76617	4.43027	26.7861	3.23317	16.6347	3150.78	3941.83	2584.36	2487.39	3779.41	0.157861	0.527095	-1.474	0.265413	-1.73941	NCOA3	-	-
chr4:143567317-143567376:mpeak_55098|chr4_142950067_143767604_INPP4B_NM_-|	43.0489	-3.49896	1.80618	-1.93722	0.0527187	0.459935	0	0	0	1.07772	8.65006	74.4279	52.0556	106.152	105.617	82.5082	0	3.30565	-Inf	-0.633265	-Inf	INPP4B	-	chr4_142646167_-
chr19:36817772-36817822:mpeak_36323|chr19_36804224_36822620_LINC00665_NR_-|	5.39625	3.81709	1.97056	1.93706	0.0527381	0.459935	4.51078	8.86053	0	0	1.99617	0	11.0757	10.9129	8.62179	7.98467	120.727	7.2537	3.3288	-0.728089	4.05689	LINC00665	-	-
chr7:155493455-155493570:mpeak_67420|chr7_155437202_155567686_RBM33_NM_+|	18.1177	1.52492	0.787392	1.93668	0.052785	0.459935	32.7032	14.3984	9.92077	9.69951	15.3039	12.4047	18.8286	19.8415	24.7876	23.2886	150.806	51.4213	1.01651	-0.535743	1.55225	RBM33	-	chr7_155700819_+;chr7_155700830_+;chr7_155700864_+
chr9:115289858-115289915:mpeak_72514|chr9_115249247_115421542_KIAA1958_NM_+|	23.0178	-4.09987	2.11907	-1.93475	0.0530212	0.460392	0	0	0	0	6.65389	43.9801	65.3464	60.5167	15.0881	38.5926	0	5.82666	-Inf	0.522076	-Inf	KIAA1958	-	-
chr4:128884117-128884171:mpeak_54889|chr4_128841991_128887139_MFSD8_NM_-|	45.9433	-2.51998	1.30275	-1.93435	0.0530697	0.460392	2.25539	0	0	9.69951	7.98467	89.088	94.1431	88.2949	89.4511	78.5159	1.2309	6.90082	-2.38605	0.101008	-2.48706	MFSD8	chr4:128884120:-	chr4_127962966_-
chr20:50767814-50767875:mpeak_45028|chr20_50701805_50808524_ZFP64_NM_-|	12.4227	1.83405	0.948204	1.93424	0.053084	0.460392	7.89387	16.6135	5.95246	3.23317	3.32695	13.5323	17.7211	24.8019	11.855	19.2963	78.415	22.3626	1.5548	-0.255244	1.81004	ZFP64	chr20:50767817:-	chr20_52151269_-
chr6:86349949-86350056:mpeak_62124|chr6_86322641_86353043_SYNCRIP_NM_-|	236.283	1.19324	0.617023	1.93386	0.0531302	0.460392	16.9154	9.9681	17.8574	5.38862	13.9732	295.456	249.202	491.078	608.914	654.077	4.93585	2.12188	0.115639	-1.10232	1.21796	SYNCRIP	-	chr6_85640258_-
chr5:32395259-32395411:mpeak_56197|chr5_32356045_32444844_ZFR_NM_-|	84.2192	0.831186	0.42988	1.93353	0.0531708	0.460392	77.811	69.7767	42.6593	47.4198	43.2503	119.536	96.3583	92.2632	120.705	132.412	68.3612	38.6036	0.731539	-0.0929017	0.824441	ZFR	-	chr5_32395192_-;chr5_32395238_-
chr8:104338131-104338327:mpeak_69707|chr8_104310660_104343568_FZD6_NM_+|	76.8115	-1.78244	0.921871	-1.93351	0.053174	0.460392	1.1277	4.43027	9.92077	10.7772	9.98084	119.536	162.812	90.279	170.28	188.971	1.96848	6.82465	-1.87965	-0.0859802	-1.79367	FZD6	-	chr8_103326096_+
chr2:233428984-233429068:mpeak_43187|chr2_233415296_233445613_EIF4E2_NM_+|	43.6724	1.28827	0.666983	1.93149	0.0534223	0.462055	24.8093	15.5059	17.8574	15.0881	9.98084	42.8524	56.4859	59.5246	103.461	91.1583	40.5838	16.8905	0.494424	-0.770264	1.26469	EIF4E2	-	-
chr16:78647775-78647829:mpeak_28777|chr16_78133309_79245504_WWOX_NM_+|	19.2446	-3.47338	1.79881	-1.93093	0.0534916	0.462167	0	1.10757	0	8.62179	9.98084	30.4478	37.6573	30.7544	45.2644	28.6117	1.62626	17.7793	-3.48508	-0.0345079	-3.45057	WWOX	chr16:78647828:+	chr16_78613932_+
chr10:89626736-89626891:mpeak_9818|chr10_89623194_89725043_PTEN_NM_+|	157.737	1.12291	0.581802	1.93006	0.0535998	0.462615	13.5323	24.3665	13.8891	16.1659	8.65006	284.179	190.501	320.441	355.649	349.995	7.98406	3.77211	0.554595	-0.527158	1.08175	PTEN	chr10:89626806:+	chr10_87867048_+;chr10_87867168_+
chr12:46354183-46354314:mpeak_15968|chr12_46315977_46384401_SCAF11_NM_-|	312.189	0.897021	0.465319	1.92775	0.0538857	0.464114	131.94	119.617	62.5009	109.928	101.805	372.14	484.006	469.253	641.246	629.458	29.3826	15.7609	0.460448	-0.43816	0.898607	SCAF11	chr12:46354238:-	chr12_45960457_-
chr8:62489175-62489225:mpeak_68682|chr8_62416068_62627199_ASPH_NM_-|	38.1999	-3.29018	1.70675	-1.92775	0.0538865	0.464114	0	0	0	6.46634	3.32695	65.4063	44.3027	72.4217	68.9743	121.101	0	3.73082	-Inf	-0.673655	-Inf	ASPH	chr8:62489174:-	chr8_61576616_-
chr16:19626269-19626342:mpeak_27152|chr16_19566736_19711699_C16orf62_NM_+|	66.2611	-1.77796	0.92304	-1.92621	0.0540787	0.464464	4.51078	2.21513	16.8653	7.54407	18.6309	92.471	118.51	91.2711	196.146	114.447	3.18793	10.7102	-2.09292	-0.344633	-1.74829	C16orf62	chr16:19626339:+	chr16_19615016_+
chr15:65851026-65851074:mpeak_25159|chr15_65822826_65868640_HACD3_NM_+|	329.139	1.60912	0.835397	1.92617	0.0540834	0.464464	14.66	6.6454	5.95246	1.07772	0	886.369	829.567	515.88	439.711	591.531	1.24162	0.454404	2.18455	0.734371	1.45018	HACD3	-	-
chr2:183832004-183832102:mpeak_42052|chr2_183790546_183903586_NCKAP1_NM_-|	87.1116	1.70926	0.887436	1.92606	0.0540969	0.464464	30.4478	15.5059	11.9049	4.3109	1.99617	134.196	224.836	104.168	154.115	189.636	12.7993	4.06592	1.92026	0.265838	1.65442	NCKAP1	-	-
chr1:155410637-155410687:mpeak_4994|chr1_155307542_155532324_ASH1L_NM_-|	63.5298	-3.58479	1.86204	-1.92519	0.0542052	0.464907	0	0	0	0	6.65389	86.8326	159.49	115.081	100.228	167.013	0	1.74039	-Inf	-0.0492794	-Inf	ASH1L	-	-
chr14:51130527-51130867:mpeak_21696|chr14_51102102_51135071_SAV1_NM_-|	62.7543	-1.85261	0.962805	-1.92418	0.0543318	0.465507	2.25539	2.21513	11.9049	2.15545	13.3078	98.1095	117.402	123.018	126.094	131.082	2.07438	7.19849	-2.02902	-0.234004	-1.79502	SAV1	-	-
chr11:67953240-67953371:mpeak_13186|chr11_67926638_67981239_SUV420H1_NM_-|	73.2577	-3.39053	1.7627	-1.92349	0.0544185	0.465763	0	1.10757	9.92077	14.0104	1.33078	124.047	105.219	138.891	243.566	94.4853	0.483094	5.29666	-3.92654	-0.471832	-3.45471	SUV420H1	-	-
chr17:49357409-49357469:mpeak_31820|chr17_49337896_49375142_UTP18_NM_+|	43.4812	-2.98691	1.55418	-1.92186	0.0546237	0.467032	1.1277	0	5.95246	5.38862	3.99233	81.1941	74.2069	98.2157	86.2179	78.5159	0.725668	5.83132	-3.18027	-0.173827	-3.00644	UTP18	-	-
chr12:47502788-47502842:mpeak_16022|chr12_47473385_47628789_PCED1B_NM_+|	5.12237	2.70237	1.40685	1.92086	0.0547497	0.467623	5.63848	7.75296	4.96039	2.15545	3.32695	0	4.43027	7.93662	9.69951	5.32311	302.272	45.484	0.943768	-1.78865	2.73242	PCED1B	-	chr12_47109056_+
chr8:141566283-141566400:mpeak_70339|chr8_141542251_141645646_AGO2_NM_-|	161.518	1.35724	0.707583	1.91814	0.0550936	0.469895	9.02157	8.86053	6.94454	3.23317	0.665389	319.138	340.023	314.489	283.441	329.368	2.71286	1.16932	1.3067	0.0925605	1.21414	AGO2	-	-
chr3:172468563-172468652:mpeak_51629|chr3_172468474_172537937_ECT2_NM_+|	79.0674	1.55468	0.810671	1.91777	0.0551401	0.469895	21.4262	4.43027	4.96039	4.3109	5.32311	136.451	143.984	121.033	149.804	198.951	9.22014	3.10659	1.41007	-0.159383	1.56946	ECT2	-	-
chr7:1064116-1064218:mpeak_63917|chr7_1037440_1177893_C7orf50_NM_-|	389.072	-1.26435	0.659571	-1.91693	0.0552467	0.469895	12.4047	3.3227	11.9049	16.1659	24.6194	711.576	860.579	754.971	847.091	648.089	1.00037	2.34163	-1.1593	0.0676843	-1.22698	C7orf50	chr7:1064115:-;chr7:1064148:-	chr7_1024505_-
chr10:27456412-27456642:mpeak_8436|chr10_27443752_27475307_MASTL_NM_+|	30.8087	-1.95046	1.01772	-1.9165	0.0553015	0.469895	47.3632	44.3027	45.6356	92.6842	43.9157	19.1708	3.3227	2.97623	5.38862	3.32695	407.521	1558.66	-0.406385	1.52898	-1.93536	MASTL	chr10:27456470:+;chr10:27456517:+;chr10:27456589:+	chr10_27167540_+;chr10_27167593_+;chr10_27167658_+
chr1:172577229-172577290:mpeak_5635|chr1_172501488_172578955_SUCO_NM_+|	346.311	-3.00399	1.56744	-1.9165	0.0553019	0.469895	0	0	0.992077	5.38862	3.32695	412.737	469.608	858.147	979.651	733.259	0	0.377574	-Inf	-0.957985	-Inf	SUCO	chr1:172577280:+	chr1_172608139_+
chr10:98644794-98644845:mpeak_10137|chr10_98592016_98714709_LCOR_NM_+|	59.1328	-3.15886	1.64899	-1.91563	0.0554122	0.470345	0	0	0.992077	1.07772	7.98467	65.4063	76.4221	154.764	133.638	151.043	0	2.28799	-Inf	-1.04657	-Inf	LCOR	chr10:98644847:+	chr10_96885088_+
chr3:71743016-71743078:mpeak_49537|chr3_71733879_71803924_EIF4E3_NM_-|	19.2198	2.10193	1.09782	1.91465	0.0555373	0.470919	13.5323	8.86053	5.95246	6.46634	0	21.4262	27.6892	27.7782	31.254	49.2388	45.5924	11.4701	1.43548	-0.555437	1.99091	EIF4E3	-	-
chr10:22094479-22094536:mpeak_8303|chr10_22045684_22292650_DNAJC1_NM_-|	111.75	-1.60114	0.837573	-1.91164	0.0559218	0.473629	1.1277	4.43027	3.96831	9.69951	13.3078	201.858	207.115	237.107	208.001	230.89	1.35901	3.99049	-1.69407	-0.140051	-1.55401	DNAJC1	chr10:22094482:-	chr10_21805546_-
chr9:138712680-138712738:mpeak_73467|chr9_138703457_138799005_CAMSAP1_NM_-|	70.8338	1.37223	0.717976	1.91125	0.0559723	0.473629	9.02157	15.5059	3.96831	6.46634	1.99617	147.728	153.952	99.2077	148.726	121.766	8.13031	3.36241	1.56544	0.291626	1.27381	CAMSAP1	-	-
chr4:107163561-107163684:mpeak_54521|chr4_106967837_107237861_TBCK_NM_-|	18.8345	2.04439	1.06994	1.91074	0.0560375	0.473693	6.76617	7.75296	0.992077	0	5.32311	18.0431	36.5497	42.6593	32.3317	37.9272	26.5953	5.59271	1.78602	-0.463533	2.24955	TBCK	-	-
chr13:115087812-115087917:mpeak_20829|chr13_115079964_115089262_CHAMP1_NM_+|	25.4058	1.57079	0.822908	1.90882	0.0562847	0.474228	29.3201	56.4859	21.8257	20.4768	16.6347	25.937	9.9681	33.7306	23.7099	15.9693	238.98	80.2851	1.12686	-0.446823	1.57369	CHAMP1	chr13:115087863:+;chr13:115087916:+	chr13_114322387_+;chr13_114322486_+
chr14:32546565-32546645:mpeak_21297|chr14_32546494_32623826_ARHGAP5_NM_+|	46.7995	-3.32908	1.74439	-1.90845	0.0563329	0.474228	0	0	0	5.38862	5.9885	80.0664	38.7648	73.4137	137.949	126.424	0	3.36814	-Inf	-0.922234	-Inf	ARHGAP5	-	-
chr14:105480203-105480260:mpeak_23658|chr14_105478272_105487425_CDCA4_NM_-|	9.10216	3.94069	2.06493	1.90838	0.0563417	0.474228	1.1277	9.9681	0	0	0	9.02157	38.7648	3.96831	7.54407	20.6271	23.2196	0	Inf	1.15722	Inf	CDCA4	chr14:105480206:-	chr14_105013871_-
chr6:152265305-152265453:mpeak_63499|chr6_152011630_152419866_ESR1_NM_+|	608.233	-2.20039	1.15317	-1.90813	0.0563749	0.474228	6.76617	5.53783	17.8574	1.07772	1.33078	2344.48	2137.6	616.08	478.509	473.092	0.274515	1.29273	-0.134963	2.1005	-2.23546	ESR1	-	-
chr3:108272483-108272557:mpeak_49960|chr3_108270166_108308491_KIAA1524_NM_-|	28.9502	1.20858	0.633785	1.90693	0.0565302	0.474228	14.66	17.7211	9.92077	11.855	7.98467	41.7247	32.1194	42.6593	54.9639	55.8927	43.8506	19.3859	0.706721	-0.47087	1.17759	KIAA1524	-	-
chr11:34120547-34120616:mpeak_12076|chr11_34073229_34120849_CAPRIN1_NM_+|	532.556	-1.2877	0.675451	-1.90642	0.0565953	0.474228	27.0647	7.75296	46.6276	71.1298	41.2541	855.921	935.894	834.337	1072.34	1433.25	1.94315	4.76094	-1.60628	-0.31343	-1.29285	CAPRIN1	chr11:34120607:+	chr11_34099077_+
chr1:193056772-193057001:mpeak_6155|chr1_193028551_193060780_TROVE2_NM_+|	58.7015	1.38078	0.724703	1.9053	0.0567408	0.474228	14.66	14.3984	12.897	4.3109	3.32695	93.5987	99.681	107.144	141.182	95.816	15.0344	5.96697	1.08584	-0.247352	1.3332	TROVE2	-	chr1_193087675_+;chr1_193087718_+;chr1_193087871_+;chr1_193087912_+
chr19:39330437-39330553:mpeak_36473|chr19_39327420_39342979_HNRNPL_NM_-mpeak_36473|chr19_39327420_39342979_HNRNPL_NM_-||	130.566	-1.63978	0.860642	-1.9053	0.0567411	0.474228	4.51078	6.6454	5.95246	30.1763	14.6386	245.838	263.601	204.368	219.856	310.071	2.1899	6.91375	-1.60109	0.0575107	-1.6586	HNRNPL	chr19:39330440:-;chr19:39330493:-	chr19_38839851_-
chr5:169026024-169026166:mpeak_59384|chr5_169010637_169031063_SPDL1_NM_+|	23.204	2.26978	1.19133	1.90526	0.0567466	0.474228	29.3201	9.9681	1.98415	9.69951	8.65006	27.0647	22.1513	11.9049	47.4198	63.8774	79.828	16.5044	1.53518	-0.738865	2.27405	SPDL1	-	-
chr12:122803763-122803898:mpeak_18832|chr12_122757647_122907116_CLIP1_NM_-|	30.2858	1.37016	0.719304	1.90485	0.0567998	0.474228	14.66	11.0757	13.8891	5.38862	5.32311	36.0863	37.6573	52.5801	68.9743	57.2235	34.8989	13.7605	0.650028	-0.692618	1.34265	CLIP1	-	-
chr6:167346500-167346557:mpeak_63769|chr6_167343279_167370077_RNASET2_NM_-|	88.6418	-3.53057	1.85443	-1.90386	0.0569284	0.474228	0	1.10757	15.8732	1.07772	1.33078	144.345	219.298	127.978	163.814	211.594	0.304575	3.63176	-3.45998	0.115822	-3.5758	RNASET2	chr6:167346507:-	chr6_166933019_-
chr6:30708291-30708377:mpeak_60793|chr6_30695922_30710453_FLOT1_NM_-|	272.018	-2.35652	1.23785	-1.90371	0.0569474	0.474228	0	2.21513	10.9129	0	10.6462	443.184	464.07	590.286	609.992	588.869	0.244158	1.20499	-2.69787	-0.39473	-2.30314	FLOT1	chr6:30708272:-	chr6_30740550_-
chr20:4928011-4928061:mpeak_43689|chr20_4837850_4990939_SLC23A2_NM_-|	14.3126	-4.14663	2.17846	-1.90347	0.0569792	0.474228	0	0	0	0	6.65389	32.7032	35.4421	29.7623	8.62179	29.9425	0	9.73836	-Inf	0.581129	-Inf	SLC23A2	-	chr20_4947380_-
chr9:125652744-125652833:mpeak_72817|chr9_125612101_125667562_RC3H2_NM_-|	22.9792	1.94381	1.02144	1.90301	0.0570398	0.474228	13.5323	8.86053	5.95246	5.38862	0	28.1924	42.0875	48.6118	31.254	45.9118	31.8624	9.01677	1.56644	-0.254729	1.82117	RC3H2	-	chr9_122890534_-
chr14:58752512-58752577:mpeak_22020|chr14_58734111_58764855_PSMA3-AS1_NR_-|	52.1313	-2.53353	1.33193	-1.90215	0.057151	0.474228	1.1277	1.10757	0.992077	5.38862	10.6462	107.131	103.004	126.986	102.384	62.5466	1.06373	5.83281	-2.34434	0.110723	-2.45506	PSMA3-AS1	chr14:58752526:-	chr14_58285809_-
chr12:10765689-10765739:mpeak_15190|chr12_10758973_10766208_MAGOHB_NM_-|	113.095	1.58599	0.834061	1.90153	0.0572324	0.474228	4.51078	7.75296	1.98415	2.15545	3.99233	169.154	189.394	172.621	281.286	298.094	3.42039	1.08137	1.17769	-0.483606	1.6613	MAGOHB	chr12:10765688:-	chr12_10613090_-
chr16:19083376-19083436:mpeak_27108|chr16_19078916_19089402_COQ7_NM_+|	41.4671	1.49411	0.786018	1.90087	0.0573196	0.474228	12.4047	8.86053	2.97623	2.15545	10.6462	59.7679	55.3783	76.39	91.6065	94.4853	18.468	6.01105	1.01555	-0.603788	1.61934	COQ7	chr16:19083428:+	-
chr7:6475804-6475854:mpeak_64163|chr7_6449666_6487643_DAGLB_NM_-|	19.7551	-3.06763	1.61416	-1.90044	0.0573748	0.474228	0	1.10757	3.96831	3.23317	9.31545	32.7032	29.9043	38.691	42.0312	36.5964	1.76906	14.0787	-3.31352	-0.321063	-2.99245	DAGLB	chr7:6475799:-	chr7_6436173_-
chr7:745218-745280:mpeak_63870|chr7_590239_767313_PRKAR1B_NM_-|	115.398	1.42558	0.750137	1.90043	0.057377	0.474228	9.02157	5.53783	2.97623	4.3109	3.32695	216.518	167.243	303.576	233.866	207.601	3.79388	1.42463	1.04093	-0.372157	1.41309	PRKAR1B	chr7:745227:-	chr7_705574_-
chr15:42741857-42741907:mpeak_24204|chr15_42709558_42783395_ZNF106_NM_-|	70.0509	-3.79229	1.99589	-1.90005	0.0574264	0.474228	0	1.10757	1.98415	16.1659	0	142.09	178.318	120.041	147.648	93.1545	0.345674	5.02988	-3.44954	0.413497	-3.86304	ZNF106	chr15:42741858:-	chr15_42449662_-
chr6:152085395-152085497:mpeak_63482|chr6_152011630_152419866_ESR1_NM_+|	607.422	-1.41986	0.74741	-1.8997	0.0574723	0.474228	6.76617	6.6454	1.98415	1.07772	7.98467	2344.48	2137.6	616.08	478.509	473.092	0.299226	0.704643	0.864845	2.1005	-1.23565	ESR1	-	-
chr1:78171684-78171734:mpeak_2697|chr1_78163159_78225564_USP33_NM_-|	60.5221	-3.36273	1.77036	-1.89946	0.0575041	0.474228	0	0	0	0	6.65389	95.8541	114.079	104.168	148.726	135.739	0	1.71213	-Inf	-0.303515	-Inf	USP33	chr1:78171677:-	chr1_77705993_-
chr7:156747084-156747163:mpeak_67453|chr7_156742416_156762222_NOM1_NM_+|	28.7664	-1.85025	0.974128	-1.8994	0.0575123	0.474228	9.02157	1.10757	5.95246	7.54407	9.98084	49.6186	104.111	38.691	23.7099	37.9272	6.58892	23.4006	-0.627798	1.20063	-1.82843	NOM1	chr7:156747140:+	chr7_156954445_+
chr9:132654157-132654218:mpeak_73215|chr9_132652825_132805473_FNBP1_NM_-|	38.6999	-1.11442	0.586787	-1.89918	0.0575405	0.474228	31.5755	47.6254	29.7623	53.8862	51.9004	45.1078	50.9481	26.7861	24.7876	24.6194	82.4529	177.902	-0.190263	0.919175	-1.10944	FNBP1	chr9:132654163:-	chr9_129891885_-
chr20:31435695-31435796:mpeak_44169|chr20_31407698_31436477_MAPRE1_NM_+|	115.292	-2.13782	1.12583	-1.89888	0.0575798	0.474228	4.51078	0	11.9049	0	8.65006	274.03	271.354	174.606	184.291	223.571	0.827084	3.52895	-1.60308	0.490058	-2.09313	MAPRE1	-	-
chr5:148926376-148926441:mpeak_59033|chr5_148876423_148931115_CSNK1A1_NM_-|	99.0437	1.47006	0.774243	1.89871	0.057603	0.474228	5.63848	6.6454	4.96039	1.07772	3.32695	162.388	145.091	197.423	195.068	268.817	3.99502	1.41614	0.976369	-0.519872	1.49624	CSNK1A1	chr5:148926386:-	chr5_149546826_-
chr10:104271956-104272010:mpeak_10432|chr10_104263718_104389822_SUFU_NM_+|	17.0383	-2.29242	1.208	-1.89771	0.0577348	0.474837	2.25539	1.10757	5.95246	9.69951	3.32695	27.0647	43.1951	30.7544	15.0881	31.9387	4.78646	24.4004	-1.91163	0.43824	-2.34987	SUFU	-	chr10_102512272_+;chr10_102512311_+
chr11:120907230-120907330:mpeak_14523|chr11_120894802_120957486_TBCEL_NM_+|	29.8153	1.55297	0.819915	1.89406	0.058217	0.477903	6.76617	6.6454	7.93662	4.3109	12.6424	16.9154	22.1513	71.4296	58.1971	91.1583	34.3299	11.2734	-0.30712	-1.91367	1.60655	TBCEL	-	-
chr5:76737763-76737850:mpeak_57238|chr5_76729112_76788332_WDR41_NM_-|	64.2066	-2.27823	1.20286	-1.89401	0.0582241	0.477903	1.1277	1.10757	3.96831	10.7772	3.99233	95.8541	138.446	121.033	120.705	145.055	0.954017	4.84442	-2.48248	-0.138244	-2.34424	WDR41	chr5:76737767:-;chr5:76737799:-	chr5_77441941_-;chr5_77441975_-
chr7:140098207-140098268:mpeak_67074|chr7_140035304_140098350_SLC37A3_NM_-|	61.1054	-1.48958	0.786799	-1.89321	0.0583299	0.478294	6.76617	2.21513	4.96039	8.62179	8.65006	126.302	179.426	82.3424	109.928	81.8429	2.93768	8.11061	-0.722693	0.742438	-1.46513	SLC37A3	-	-
chr3:53137205-53137262:mpeak_49165|chr3_53126086_53164470_RFT1_NM_-|	96.0733	-3.6565	1.9327	-1.89192	0.0585019	0.479225	0	0	0	10.7772	0.665389	163.516	145.091	139.883	199.379	301.421	0	1.786	-Inf	-0.468877	-Inf	RFT1	chr3:53137211:-	chr3_53103196_-
chr16:24566916-24566974:mpeak_27322|chr16_24550907_24582196_RBBP6_NM_+|	52.0086	-2.96864	1.57024	-1.89057	0.0586815	0.479481	1.1277	0	4.96039	1.07772	3.32695	119.536	124.047	87.3028	86.2179	92.4891	0.462961	3.52057	-2.46895	0.457898	-2.92684	RBBP6	chr16:24566936:+	chr16_24555612_+
chr10:71880280-71880406:mpeak_9306|chr10_71874085_71892690_AIFM2_NM_-|	93.2745	-2.46117	1.30215	-1.89009	0.0587461	0.479481	2.25539	0	11.9049	0	5.32311	200.73	178.318	159.724	164.892	209.598	0.595015	3.22493	-2.34835	0.0899259	-2.43827	AIFM2	-	-
chr22:46892825-46892885:mpeak_47581|chr22_46759084_46933067_CELSR1_NM_-|	22.1857	-2.25594	1.19369	-1.88989	0.0587725	0.479481	13.5323	21.0438	28.7702	30.1763	7.31928	54.1294	32.1194	22.8178	8.62179	3.32695	40.0888	190.602	-0.353526	1.89577	-2.24929	CELSR1	chr22:46892833:-	chr22_46496937_-;chr22_46496973_-
chr16:31716509-31716586:mpeak_27742|chr16_31711933_31718211_CLUHP3_NR_+|	4.93651	4.01689	2.12572	1.88967	0.0588025	0.479481	4.51078	15.5059	2.97623	7.54407	4.65772	1.1277	0	1.98415	1.07772	9.98084	1775.01	116.372	0.984184	-2.94683	3.93102	CLUHP3	chr16:31716581:+	chr16_31705258_+
chr19:54681987-54682110:mpeak_37490|chr19_54678125_54693733_MBOAT7_NM_-|	159.713	1.37911	0.729882	1.8895	0.0588253	0.479481	9.02157	7.75296	4.96039	10.7772	1.99617	242.455	198.254	375.997	427.856	318.056	3.80626	1.58068	0.504734	-0.763096	1.26783	MBOAT7	chr19:54681977:-;chr19:54682042:-	chr19_54178261_-;chr19_54178326_-
chr2:198285210-198285274:mpeak_42311|chr2_198257185_198299817_SF3B1_NM_-|	111.553	1.32817	0.703613	1.88765	0.0590731	0.481024	13.5323	9.9681	3.96831	3.23317	7.31928	168.027	240.342	178.574	276.975	213.59	5.75471	2.17007	1.27953	-0.127471	1.407	SF3B1	-	-
chr1:151495906-151496024:mpeak_4704|chr1_151483861_151509680_CGN_NM_+|	71.1938	-1.64818	0.873868	-1.88608	0.0592843	0.481286	10.1493	2.21513	13.8891	3.23317	15.3039	149.984	208.222	115.081	106.695	87.166	3.45176	10.4959	-0.806006	0.798418	-1.60442	CGN	-	-
chr3:185337251-185337302:mpeak_51968|chr3_185304030_185347569_SENP2_NM_+|	35.8296	-2.74368	1.45474	-1.88603	0.0592913	0.481286	2.25539	0	11.9049	0	5.32311	58.6402	98.5734	66.4692	45.2644	69.8659	1.4346	9.48684	-2.34835	0.376929	-2.72528	SENP2	-	-
chr3:133919404-133919457:mpeak_50711|chr3_133877108_133969586_RYK_NM_-|	160.301	-2.96328	1.57157	-1.88556	0.0593546	0.481286	1.1277	0	5.95246	2.15545	3.99233	293.201	369.927	249.011	296.374	381.268	0.170057	1.3058	-2.83862	0.10222	-2.94084	RYK	chr3:133919394:-	chr3_134200552_-
chr1:20076570-20076629:mpeak_753|chr1_20009937_20126410_TMCO4_NM_-|	7.6732	-2.73268	1.44936	-1.88544	0.05937	0.481286	0	2.21513	7.93662	5.38862	3.99233	13.5323	13.2908	4.96039	10.7772	14.6386	8.25829	57.0104	-2.38181	0.4055	-2.78731	TMCO4	chr1:20076564:-	chr1_19750065_-
chr7:138583382-138583438:mpeak_66982|chr7_138522905_138666064_KIAA1549_NM_-|	23.9281	1.59855	0.847935	1.88523	0.0593985	0.481286	9.02157	9.9681	0.992077	6.46634	5.9885	34.9586	29.9043	62.5009	35.5649	43.9157	29.2766	9.4709	1.0829	-0.545275	1.62818	KIAA1549	chr7:138583383:-	-
chr19:52901752-52901878:mpeak_37309|chr19_52901120_52918376_ZNF528_NM_+|	7.06125	2.65624	1.41015	1.88366	0.0596113	0.481557	13.5323	4.43027	6.94454	5.38862	9.98084	0	3.3227	10.9129	10.7772	5.32311	540.603	82.604	0.272011	-2.43827	2.71029	ZNF528	-	-
chr3:9486734-9486996:mpeak_47794|chr3_9439383_9517166_SETD5_NM_+|	735.924	1.17676	0.62477	1.88352	0.0596306	0.481557	25.937	16.6135	10.9129	1.07772	6.65389	1577.65	2049	1310.53	1274.95	1085.92	1.17327	0.50783	1.77539	0.567269	1.20812	SETD5	-	chr3_9445183_+
chr11:674179-674296:mpeak_11276|chr11_644654_695754_DEAF1_NM_-|	23.5283	-2.0225	1.0739	-1.88333	0.0596557	0.481557	2.25539	2.21513	1.98415	7.54407	5.32311	56.3848	62.0237	32.7386	44.1867	20.6271	3.77551	15.224	-1.14711	0.864487	-2.0116	DEAF1	chr11:674184:-;chr11:674245:-	chr11_674185_-;chr11_674225_-;chr11_674242_-;chr11_674266_-
chr19:23992266-23992318:mpeak_36011|chr19_23945815_24009871_RPSAP58_NR_+|	1545.84	-2.20328	1.16999	-1.88316	0.0596782	0.481557	2.25539	0	2.97623	3.23317	7.31928	3114.7	3300.55	3233.18	3394.83	2399.39	0.0351568	0.149862	-1.99961	0.0921554	-2.09176	RPSAP58	chr19:23992317:+	chr19_23809514_+
chr10:38264979-38265047:mpeak_8678|chr10_38242123_38265453_ZNF25_NM_-|	5.64185	3.53612	1.8781	1.88282	0.0597253	0.481557	13.5323	6.6454	0.992077	8.62179	5.32311	0	2.21513	0.992077	10.7772	7.31928	910.905	78.2508	1.01884	-2.52228	3.54112	ZNF25	chr10:38264975:-	chr10_37976039_-
chr3:142743661-142743720:mpeak_50975|chr3_142720371_142775153_U2SURP_NM_+|	58.0017	-1.88214	0.999885	-1.88236	0.0597874	0.481585	2.25539	1.10757	5.95246	5.38862	8.65006	103.748	105.219	99.2077	112.083	136.405	1.60933	5.74961	-1.9866	-0.149589	-1.83701	U2SURP	chr3:142743717:+	chr3_143024880_+
chr12:27113609-27113702:mpeak_15589|chr12_27091304_27117528_FGFR1OP2_NM_+|	146.776	-0.612313	0.325613	-1.88049	0.0600407	0.483151	112.77	138.446	125.994	147.648	125.759	193.964	207.115	141.867	135.793	138.401	62.635	95.9956	-0.0839491	0.532052	-0.616001	FGFR1OP2	chr12:27113681:+	chr12_26960763_+
chr16:9199065-9199171:mpeak_26762|chr16_9185536_9210524_C16orf72_NM_+|	50.3767	-2.15832	1.14829	-1.87959	0.0601636	0.483666	2.25539	1.10757	3.96831	11.855	3.32695	86.8326	129.585	60.5167	113.161	91.1583	1.55392	7.23097	-1.9246	0.293682	-2.21828	C16orf72	chr16:9199125:+;chr16:9199163:+	chr16_9105304_+
chr1:36204049-36204099:mpeak_1523|chr1_36202207_36235551_CLSPN_NM_-|	23.1811	-4.04136	2.15195	-1.878	0.060381	0.484939	0	0	9.92077	0	0	41.7247	49.8405	46.6276	43.109	40.5887	0	7.61231	-Inf	0.0757167	-Inf	CLSPN	-	-
chr6:138545959-138546023:mpeak_63092|chr6_138483052_138657431_ARFGEF3_NM_+|	251.301	1.63907	0.873258	1.87696	0.0605236	0.485175	3.38309	7.75296	5.95246	0	0	510.846	492.867	515.88	497.908	478.415	1.10949	0.398904	1.48864	0.0128653	1.47578	ARFGEF3	chr6:138546011:+	-
chr7:2400339-2400526:mpeak_63976|chr7_2394473_2419838_EIF3B_NM_+|	806.772	1.33734	0.712516	1.87692	0.0605287	0.485175	53.0017	15.5059	29.7623	17.2436	11.977	1252.87	1267.06	1750.02	1827.82	1842.46	2.71864	1.08818	0.80093	-0.520031	1.32096	EIF3B	-	-
chr3:195009839-195009891:mpeak_52185|chr3_195000157_195163817_ACAP2_NM_-|	32.6187	-4.02437	2.14619	-1.87512	0.0607758	0.486681	0	0	10.9129	0	0	63.151	58.701	69.4454	61.4303	62.5466	0	5.64198	-Inf	-0.0816617	-Inf	ACAP2	-	-
chr13:28224751-28225110:mpeak_19534|chr13_28194879_28239822_POLR1D_NM_+|	117.743	-1.92229	1.02589	-1.87377	0.0609619	0.487695	3.38309	1.10757	9.92077	0	10.6462	230.05	276.892	212.305	215.545	217.582	0.885833	3.18655	-1.61037	0.236518	-1.84689	POLR1D	-	chr13_27650793_+
chr7:5390913-5390991:mpeak_64081|chr7_5347943_5463177_TNRC18_NM_-mpeak_64081|chr7_5347943_5463177_TNRC18_NM_-||	205.387	-1.41835	0.758556	-1.86981	0.0615105	0.491605	420.63	367.712	290.679	398.758	393.245	60.8956	60.9161	6.94454	16.1659	37.9272	647.181	1773.79	0.127248	1.58185	-1.4546	TNRC18	chr7:5390919:-;chr7:5390944:-	chr7_5351329_-
chr14:55422298-55422419:mpeak_21882|chr14_55408408_55493819_WDHD1_NM_-|	30.6595	1.73813	0.930054	1.86885	0.061644	0.492192	12.4047	7.75296	5.95246	5.38862	0	53.0017	48.7329	66.4692	46.3421	60.5504	19.8139	6.54186	1.41473	-0.184012	1.59874	WDHD1	-	-
chr8:68066319-68066377:mpeak_68807|chr8_67976602_68107616_CSPP1_NM_+|	4.99708	4.39207	2.35078	1.86834	0.0617144	0.492276	6.76617	12.1832	3.96831	15.0881	2.66156	0	0	1.98415	0	7.31928	#DIV/0!	233.441	0.388224	-Inf	Inf	CSPP1	-	chr8_67154136_+
chr21:46567204-46567256:mpeak_46256|chr21_46494492_46645461_ADARB1_NR_+mpeak_46256|chr21_46494492_46641932_ADARB1_NM_+||	9.39977	2.60789	1.39618	1.86788	0.0617792	0.492315	3.38309	7.75296	0	3.23317	0.665389	10.1493	16.6135	13.8891	9.69951	28.6117	41.6103	7.46846	2.09919	-0.37887	2.47806	ADARB1	chr21:46567255:+	chr21_45147340_+
chr5:100184765-100184815:mpeak_57712|chr5_100147833_100238989_ST8SIA4_NM_-|	8.64328	-3.65785	1.96048	-1.8658	0.0620698	0.49415	1.1277	0	1.98415	3.23317	11.3116	6.76617	24.3665	15.8732	6.46634	15.3039	3.62223	43.9091	-3.28858	0.310988	-3.59957	ST8SIA4	chr5:100184764:-	chr5_100849061_-
chr12:108923925-108924098:mpeak_18138|chr12_108917411_108955165_SART3_NM_-|	126.128	0.615744	0.330201	1.86476	0.0622153	0.49451	155.622	167.243	159.724	160.581	147.051	67.6617	78.6372	109.129	113.161	102.47	220.688	143.908	0.0513686	-0.56549	0.616858	SART3	-	chr12_108530254_-
chr3:42257039-42257089:mpeak_48662|chr3_42132745_42264433_TRAK1_NM_+|	15.7388	-2.67564	1.43496	-1.86461	0.0622354	0.49451	2.25539	0	2.97623	0	5.9885	31.5755	55.3783	17.8574	19.399	21.9578	2.59378	15.1395	-1.40592	1.13927	-2.54519	TRAK1	-	-
chr5:34941231-34941294:mpeak_56263|chr5_34929697_34954657_DNAJC21_NM_+|	66.4968	-1.46474	0.786482	-1.86239	0.0625475	0.495979	5.63848	2.21513	2.97623	9.69951	9.31545	171.41	140.661	110.121	99.1506	113.782	2.51661	6.80731	-0.900535	0.535066	-1.4356	DNAJC21	-	-
chr17:21048773-21048823:mpeak_30327|chr17_21030240_21094260_DHRS7B_NM_+|	60.4169	-3.3773	1.81396	-1.86183	0.0626267	0.495979	0	0	0	0	6.65389	119.536	93.0356	124.01	95.9174	165.016	0	1.72854	-Inf	-0.271738	-Inf	DHRS7B	-	-
chr2:170753192-170753248:mpeak_41684|chr2_170684017_170938235_UBR3_NM_+|	55.7061	-1.76934	0.950693	-1.86111	0.0627287	0.495979	2.25539	2.21513	8.9287	1.07772	4.65772	146.6	126.263	94.2474	82.9847	87.8314	1.63838	5.53231	-1.12881	0.626802	-1.75562	UBR3	-	-
chr14:24660368-24660418:mpeak_21142|chr14_24659014_24664942_TM9SF1_NM_-|	93.4359	-3.42168	1.83876	-1.86086	0.0627639	0.495979	0	0	0	0	6.65389	186.07	151.737	125.002	190.757	274.14	0	1.12797	-Inf	-0.219309	-Inf	TM9SF1	chr14:24660364:-	-
chrX:9504607-9504753:mpeak_73747|chrX_9431334_9684259_TBL1X_NM_+|	952.566	-2.92514	1.57199	-1.86079	0.0627739	0.495979	1.1277	0	1.98415	9.69951	1.33078	1968.96	2021.31	1893.88	1670.47	1956.91	0.0282612	0.235715	-2.9437	0.11645	-3.06015	TBL1X	-	-
chr10:70101512-70101576:mpeak_9186|chr10_70091767_70101734_HNRNPH3_NM_+mpeak_9186|chr10_70091767_70101734_HNRNPH3_NM_+||	435.455	1.67432	0.89982	1.86073	0.0627829	0.495979	16.9154	3.3227	4.96039	3.23317	0.665389	954.031	932.571	664.692	741.474	1032.68	1.07273	0.363243	1.77683	0.214551	1.56228	HNRNPH3	chr10:70101586:+	chr10_68341786_+
chr2:192206177-192206229:mpeak_42226|chr2_192110106_192288562_MYO1B_NM_+|	167.114	-2.15619	1.15932	-1.85988	0.0629029	0.496274	1.1277	1.10757	11.9049	3.23317	4.65772	299.967	259.171	339.29	393.369	357.314	0.39977	1.81617	-2.56172	-0.378056	-2.18366	MYO1B	-	chr2_191341502_+
chr9:128002945-128002999:mpeak_72937|chr9_127999433_128003666_HSPA5_NM_-|	5294.6	1.88346	1.01303	1.85923	0.0629952	0.496274	18.0431	8.86053	12.897	2.15545	0.665389	6998.48	10253.8	10196.6	14749.7	10704.8	0.155942	0.044088	1.36036	-0.462192	1.82255	HSPA5	-	chr9_125240667_-
chr15:66786152-66786296:mpeak_25212|chr15_66783055_66790146_SNAPC5_NM_-|	25.2886	-2.25661	1.21377	-1.85918	0.0630016	0.496274	38.3417	50.9481	24.8019	51.7307	55.8927	16.9154	6.6454	6.94454	0	0.665389	378.975	1740.17	0.0163488	2.2154	-2.19905	SNAPC5	chr15:66786155:-;chr15:66786222:-	chr15_66493818_-;chr15_66493885_-
chr9:123540028-123540118:mpeak_72710|chr9_123527125_123555740_FBXW2_NM_-|	567.739	1.68931	0.909894	1.85661	0.0633672	0.498675	6.76617	4.43027	0	7.54407	0	906.667	1085.42	1122.04	1320.21	1224.32	0.562047	0.205753	1.15459	-0.29519	1.44978	FBXW2	chr9:123540027:-;chr9:123540069:-	chr9_120777750_-;chr9_120777792_-
chr14:21559837-21559976:mpeak_20920|chr14_21559299_21572863_ZNF219_NM_-|	165.138	0.980294	0.528673	1.85425	0.0637031	0.499582	73.3002	80.8523	51.588	23.7099	51.235	276.285	243.665	273.813	342.716	234.217	29.6476	14.8732	0.869809	-0.125394	0.995203	ZNF219	chr14:21559834:-;chr14:21559914:-	chr14_21091665_-;chr14_21091756_-
chr1:201969430-201969490:mpeak_6342|chr1_201951765_201974685_RNPEP_NM_+|	284.213	-2.93554	1.58365	-1.85366	0.063788	0.499582	0	1.10757	2.97623	6.46634	2.66156	506.335	697.767	422.625	533.473	668.716	0.0919828	0.744955	-2.86507	0.152645	-3.01772	RNPEP	chr1:201969480:+	chr1_202000351_+
chr1:114251346-114251404:mpeak_3691|chr1_114240347_114301777_PHTF1_NM_-|	6.00942	-4.20203	2.26731	-1.85331	0.0638382	0.499582	0	0	0	4.3109	9.98084	10.1493	5.53783	10.9129	3.23317	15.9693	0	47.4566	-Inf	-0.355959	-Inf	PHTF1	chr1:114251353:-	chr1_113708731_-
chr2:17899371-17899501:mpeak_38105|chr2_17846880_17935096_SMC6_NM_-|	17.0199	1.41415	0.763123	1.8531	0.0638674	0.499582	14.66	11.0757	3.96831	3.23317	7.31928	23.6816	26.5816	26.7861	26.9431	25.9502	51.2019	18.224	1.41062	-0.079741	1.49036	SMC6	-	-
chr2:192208649-192208804:mpeak_42227|chr2_192110106_192288562_MYO1B_NM_+|	168.702	-1.6235	0.8761	-1.8531	0.0638677	0.499582	0	5.53783	4.96039	10.7772	16.6347	299.967	259.171	339.29	393.369	357.314	0.990424	2.97001	-1.96241	-0.378056	-1.58435	MYO1B	chr2:192208795:+	chr2_191344067_+
chr15:96872430-96872535:mpeak_26061|chr15_96869156_96880576_NR2F2_NM_+mpeak_26061|chr15_96869156_96880576_NR2F2_NM_+||	213.845	1.69341	0.913904	1.85294	0.0638904	0.499582	2.25539	9.9681	0	2.15545	2.66156	393.566	505.05	345.243	385.825	491.723	1.36026	0.393935	1.92841	0.140562	1.78785	NR2F2	chr15:96872516:+	chr15_96329306_+
chr7:77539679-77539729:mpeak_65640|chr7_77428108_77584174_PHTF2_NM_+|	160.757	-3.12528	1.68677	-1.85282	0.0639085	0.499582	0	0	7.93662	0	1.99617	286.435	142.876	402.783	400.913	364.633	0	0.85017	-Inf	-0.859391	-Inf	PHTF2	-	-
chr2:25611066-25611124:mpeak_38280|chr2_25600422_25896516_DTNB_NM_-|	14.9717	-3.42364	1.84945	-1.85117	0.0641453	0.500956	0	1.10757	5.95246	4.3109	0	33.8309	43.1951	12.897	20.4768	27.9463	1.43791	16.7373	-2.62708	0.913947	-3.54102	DTNB	-	-
chr3:195968816-195968897:mpeak_52243|chr3_195965765_196014584_PCYT1A_NM_-|	6.6226	2.55427	1.38037	1.85042	0.0642525	0.501316	10.1493	4.43027	1.98415	0	6.65389	4.51078	4.43027	12.897	11.855	9.31545	163.063	25.3557	1.34013	-1.34491	2.68504	PCYT1A	-	-
chr19:45758928-45758978:mpeak_36811|chr19_45754515_45805631_MARK4_NM_+|	26.3372	-3.27731	1.77192	-1.84958	0.0643738	0.501785	1.1277	0	1.98415	0	8.65006	58.6402	62.0237	51.588	47.4198	31.9387	0.934576	8.12103	-2.6523	0.466978	-3.11928	MARK4	chr19:45758979:+	chr19_45255718_+
chr10:5751501-5751620:mpeak_7855|chr10_5726800_5804991_FAM208B_NM_+|	21.2418	-3.28513	1.77849	-1.84715	0.0647258	0.504051	0	0	1.98415	0	5.32311	21.4262	46.5178	46.6276	36.6426	53.8965	0	5.32729	-Inf	-0.42855	-Inf	FAM208B	-	-
chr12:39751977-39752038:mpeak_15842|chr12_39688319_39837192_KIF21A_NM_-|	31.3225	-1.06427	0.576614	-1.84572	0.0649333	0.505187	21.4262	24.3665	27.7782	21.5545	24.6194	55.2571	54.2708	19.8415	30.1763	33.9348	41.8092	88.0878	-0.106511	0.968612	-1.07512	KIF21A	-	-
chr19:11349663-11349713:mpeak_35304|chr19_11310215_11373168_DOCK6_NM_-|	80.7003	1.91693	1.03908	1.84484	0.0650606	0.505699	10.1493	4.43027	5.95246	3.23317	0	74.4279	171.673	202.384	158.425	176.328	5.92421	1.71011	1.25145	-0.54108	1.79253	DOCK6	-	-
chr2:65570849-65570899:mpeak_39400|chr2_65541303_65659656_SPRED2_NM_-|	11.4413	-4.04323	2.19393	-1.84291	0.0653416	0.506925	0	0	0	0	7.31928	20.2985	28.7967	29.7623	12.9327	15.3039	0	12.6197	-Inf	0.344519	-Inf	SPRED2	-	-
chr18:29702226-29702277:mpeak_33967|chr18_29671817_29709081_RNF138_NM_+|	23.6736	-3.57109	1.93806	-1.84261	0.0653861	0.506925	0	0	0	0	6.65389	37.214	53.1632	33.7306	47.4198	58.5542	0	4.76282	-Inf	-0.0433884	-Inf	RNF138	-	-
chr12:121838884-121838942:mpeak_18745|chr12_121837885_121861188_RNF34_NM_+|	82.4228	-2.29419	1.2453	-1.84229	0.065433	0.506925	2.25539	0	5.95246	0	3.99233	171.41	246.987	117.065	122.861	153.705	0.539055	2.52643	-1.5556	0.672993	-2.22859	RNF34	-	-
chr17:4184836-4184888:mpeak_29550|chr17_4175811_4269969_UBE2G1_NM_-|	84.0731	1.62278	0.880978	1.84203	0.0654715	0.506925	2.25539	7.75296	3.96831	1.07772	3.99233	78.9387	131.8	168.653	236.022	206.271	4.74917	1.47941	0.732033	-0.950623	1.68266	UBE2G1	-	chr17_4281541_-
chr3:194898772-194898938:mpeak_52177|chr3_194790840_194991895_XXYLT1_NM_-|	187.69	1.7896	0.971742	1.84164	0.0655272	0.506925	11.277	9.9681	0.992077	8.62179	0	358.607	415.337	411.712	409.535	250.852	2.74504	0.896733	1.7289	0.114827	1.61407	XXYLT1	chr3:194898775:-	chr3_195178046_-
chr4:187515531-187515581:mpeak_55751|chr4_187510374_187644987_FAT1_NM_-|	24.5212	-3.75643	2.04075	-1.84071	0.065664	0.507504	0	0	0	0	7.98467	49.6186	42.0875	28.7702	58.1971	58.5542	0	5.48693	-Inf	-0.0811804	-Inf	FAT1	-	chr4_186594424_-
chr14:35476469-35476600:mpeak_21391|chr14_35452103_35498266_SRP54_NM_+|	147.642	-3.00156	1.63188	-1.83933	0.065867	0.507642	0	1.10757	11.9049	1.07772	3.32695	234.561	287.967	243.059	356.727	336.687	0.211963	1.7416	-3.29529	-0.256766	-3.03853	SRP54	-	-
chr10:52101956-52102049:mpeak_8930|chr10_52067081_52383737_SGMS1_NM_-|	26.2489	1.92655	1.04757	1.83907	0.0659044	0.507642	5.63848	6.6454	0	0	5.32311	48.4909	33.227	60.5167	47.4198	55.2273	15.0321	3.26243	1.79139	-0.412635	2.20402	SGMS1	chr10:52101954:-;chr10:52101995:-	chr10_50342197_-
chr11:47814259-47814315:mpeak_12356|chr11_47800746_47870057_NUP160_NM_-|	23.4921	-2.07482	1.12826	-1.83896	0.0659207	0.507642	3.38309	0	13.8891	10.7772	5.32311	31.5755	34.3346	32.7386	46.3421	56.5581	5.13289	22.1098	-2.56308	-0.456237	-2.10684	NUP160	chr11:47814261:-	chr11_47792713_-
chr8:100146848-100146938:mpeak_69486|chr8_100025493_100887645_VPS13B_NM_+|	11.2609	-2.07622	1.12905	-1.83891	0.0659291	0.507642	9.02157	13.2908	4.96039	21.5545	18.6309	18.0431	12.1832	2.97623	8.62179	3.32695	73.8176	302.485	-0.431785	1.60304	-2.03483	VPS13B	-	-
chr13:53039925-53039983:mpeak_20250|chr13_53029494_53049029_CKAP2_NM_+|	23.3717	-3.00204	1.63289	-1.83848	0.0659915	0.507646	0	0	0.992077	3.23317	3.99233	25.937	36.5497	54.5643	53.8862	54.5619	0	5.04108	-Inf	-0.798398	-Inf	CKAP2	chr13:53039945:+;chr13:53039978:+	chr13_52465842_+
chr17:65171381-65171433:mpeak_32601|chr17_65074702_65241319_HELZ_NM_-|	81.2939	-2.94068	1.60017	-1.83773	0.0661023	0.508022	0	0	0.992077	6.46634	1.99617	101.493	109.649	183.534	174.591	234.217	0	1.59614	-Inf	-0.903258	-Inf	HELZ	chr17:65171382:-	chr17_67175267_-
chr3:148871869-148871926:mpeak_51051|chr3_148847370_148889881_HPS3_NM_+|	54.3796	-3.10401	1.69162	-1.83494	0.0665153	0.510718	1.1277	0	2.97623	17.2436	6.65389	87.9603	49.8405	120.041	168.125	89.8275	0.818352	7.10956	-3.98978	-0.870816	-3.11897	HPS3	chr3:148871923:+	chr3_149154135_+
chr15:63358239-63358373:mpeak_24994|chr15_63334837_63363288_TPM1_NM_+|	286.621	0.783228	0.427099	1.83383	0.0666786	0.510988	36.0863	35.4421	31.7465	35.5649	35.931	449.951	321.194	634.93	709.142	576.227	9.27561	5.37637	0.055515	-0.731295	0.78681	TPM1	chr15:63358292:+;chr15:63358377:+	chr15_63066052_+;chr15_63066092_+;chr15_63066175_+
chr20:37381055-37381105:mpeak_44439|chr20_37377096_37400201_ACTR5_NM_+|	6.43044	4.37231	2.38434	1.83376	0.0666895	0.510988	0	11.0757	0	0	0	11.277	16.6135	1.98415	5.38862	17.9655	39.7113	0	Inf	0.723415	Inf	ACTR5	-	-
chr7:80377256-80377310:mpeak_65665|chr7_80374623_80548667_SEMA3C_NM_-|	487.66	-2.8544	1.55721	-1.83302	0.066799	0.510988	1.1277	0	4.96039	9.69951	1.99617	955.158	719.918	1006.96	1052.94	1123.84	0.067322	0.523161	-3.29964	-0.341532	-2.9581	SEMA3C	chr7:80377251:-	chr7_80747940_-
chr11:73587403-73587468:mpeak_13464|chr11_73584439_73587890_COA4_NM_-|	379.729	-2.83549	1.5469	-1.83302	0.0667995	0.510988	1.1277	0	4.96039	3.23317	3.32695	893.135	666.755	710.327	787.816	726.605	0.0722933	0.517834	-2.76779	0.0727645	-2.84056	COA4	chr11:73587402:-	-
chr16:79028202-79028255:mpeak_28781|chr16_78133309_79245504_WWOX_NM_+|	20.1655	2.22107	1.21214	1.83235	0.0668989	0.511129	2.25539	19.9362	0.992077	1.07772	4.65772	30.4478	37.6573	30.7544	45.2644	28.6117	32.5844	6.42979	2.30683	-0.0345079	2.34134	WWOX	-	-
chr11:82869820-82869939:mpeak_13687|chr11_82868136_82895720_PCF11_NM_+|	30.0198	-1.05292	0.574937	-1.83137	0.0670452	0.511129	31.5755	31.0119	36.7069	46.3421	31.2733	27.0647	38.7648	19.8415	18.3213	19.2963	95.0749	198.963	-0.284201	0.781161	-1.06536	PCF11	chr11:82869878:+;chr11:82869921:+	chr11_83158836_+;chr11_83158893_+
chr1:62491280-62491480:mpeak_2443|chr1_62208148_62626579_INADL_NM_+|	14.1356	1.6145	0.881594	1.83134	0.0670496	0.511129	15.7877	13.2908	10.9129	2.15545	7.31928	13.5323	15.5059	23.8099	15.0881	23.954	100.139	32.4374	1.09723	-0.52904	1.62627	INADL	chr1:62491483:+	chr1_62025810_+
chr2:85779964-85780014:mpeak_39912|chr2_85777249_85788657_GGCX_NM_-|	71.2207	-3.28119	1.79216	-1.83086	0.0671217	0.511129	0	0	0	0	6.65389	124.047	115.187	192.463	162.736	111.12	0	1.4269	-Inf	-0.377937	-Inf	GGCX	-	chr2_85552840_-
chr1:16932499-16932662:mpeak_652|chr1_16890681_16940100_NBPF1_NM_-|	62.4659	-1.37875	0.753232	-1.83045	0.0671827	0.511129	7.89387	6.6454	14.8812	4.3109	18.6309	138.707	142.876	79.3662	100.228	111.12	5.16341	13.0103	-0.794345	0.538918	-1.33326	NBPF1	chr1:16932511:-;chr1:16932613:-	chr1_16606017_-;chr1_16606055_-
chr17:65822264-65822463:mpeak_32630|chr17_65821779_65978367_BPTF_NM_+|	32.7666	-1.54123	0.842213	-1.82997	0.0672537	0.511129	4.51078	5.53783	11.9049	4.3109	11.3116	60.8956	87.4977	36.7069	43.109	61.8812	6.77161	19.427	-0.868911	0.651579	-1.52049	BPTF	-	chr17_67826219_+;chr17_67826295_+
chr17:3742391-3742473:mpeak_29522|chr17_3716573_3749545_C17orf85_NM_-|	97.7343	1.18019	0.644923	1.82997	0.0672539	0.511129	15.7877	18.8286	8.9287	9.69951	2.66156	165.771	233.696	177.582	162.736	181.651	8.66562	4.07874	1.28626	0.199076	1.08718	C17orf85	chr17:3742402:-	chr17_3839104_-;chr17_3839141_-
chr18:55712646-55712829:mpeak_34354|chr18_55711609_56063398_NEDD4L_NM_+|	31.0421	-1.45901	0.797565	-1.82933	0.0673509	0.511156	4.51078	3.3227	10.9129	12.9327	17.9655	49.6186	37.6573	60.5167	65.7412	47.2426	8.97554	24.0985	-1.8312	-0.406323	-1.42487	NEDD4L	chr18:55712703:+;chr18:55712732:+	chr18_58045482_+
chr10:93576939-93576994:mpeak_9926|chr10_93558150_93622693_TNKS2_NM_+|	72.9378	-2.42319	1.32478	-1.82912	0.0673819	0.511156	1.1277	1.10757	6.94454	0	3.32695	175.921	208.222	86.3107	84.0625	162.355	0.581883	3.08705	-1.61517	0.792262	-2.40743	TNKS2	-	-
chr5:179249147-179249205:mpeak_59783|chr5_179233387_179263435_SQSTM1_NM_+|	785.999	-3.05346	1.67086	-1.82748	0.0676275	0.511915	0	1.10757	8.9287	8.62179	0.665389	1205.51	1550.59	1400.81	2311.72	1372.03	0.040186	0.358258	-3.45477	-0.298533	-3.15624	SQSTM1	chr5:179249198:+	chr5_179822169_+;chr5_179822205_+
chr14:96802636-96802688:mpeak_23292|chr14_96752322_96829678_ATG2B_NM_-|	19.5813	-3.6432	1.99382	-1.82725	0.0676627	0.511915	0	0	0	0	6.65389	31.5755	45.4102	24.8019	38.7981	48.5734	0	5.93179	-Inf	0.0418943	-Inf	ATG2B	-	-
chr3:15068046-15068096:mpeak_48054|chr3_14989090_15084340_NR2C2_NM_+mpeak_48054|chr3_14989090_15084340_NR2C2_NM_+||	6.19482	-3.94511	2.1591	-1.8272	0.0676691	0.511915	0	0	0.992077	0	6.65389	11.277	12.1832	6.94454	17.2436	6.65389	0	24.7908	-Inf	0.19028	-Inf	NR2C2	chr3:15068100:+	-
chr8:19218693-19218797:mpeak_67815|chr8_19171080_19252060_SH2D4A_NM_+|	28.7608	1.36833	0.749053	1.82675	0.0677378	0.511917	6.76617	9.9681	5.95246	11.855	5.32311	24.8093	31.0119	55.5563	62.508	73.8582	29.9784	12.052	0.117969	-1.19668	1.31465	SH2D4A	-	-
chr9:97697582-97697632:mpeak_71978|chr9_97488950_97848963_C9orf3_NM_+|	34.359	-3.17003	1.7357	-1.82637	0.0677941	0.511917	0	0	1.98415	1.07772	5.9885	55.2571	36.5497	57.5405	61.4303	123.762	0	3.72853	-Inf	-0.817736	-Inf	C9orf3	chr9:97697635:+	-
chr4:74094147-74094197:mpeak_53771|chr4_73942007_74124502_ANKRD17_NM_-|	18.7638	-3.60566	1.97548	-1.82521	0.0679696	0.512346	0	0	0	0	7.31928	37.214	31.0119	35.7148	43.109	33.2695	0	6.52964	-Inf	-0.131347	-Inf	ANKRD17	-	chr4_73228396_-
chr3:30720327-30720390:mpeak_48341|chr3_30647993_30732911_TGFBR2_NM_+|	115.985	2.1083	1.15519	1.82507	0.0679912	0.512346	219.901	244.772	243.059	233.866	201.613	0	2.21513	3.96831	6.46634	3.99233	20977.2	4703.25	0.0387483	-2.11834	2.15709	TGFBR2	-	-
chr8:61750359-61750410:mpeak_68652|chr8_61591323_61777574_CHD7_NM_+|	32.7944	1.69352	0.928231	1.82445	0.0680834	0.512346	7.89387	5.53783	1.98415	3.23317	0.665389	50.7463	84.175	59.5246	54.9639	59.2196	9.95521	3.38655	1.77605	0.220415	1.55564	CHD7	-	chr8_60837818_+
chr2:114354479-114354570:mpeak_40723|chr2_114341229_114356183_WASH2P_NR_+|	4.70942	2.87681	1.5771	1.82412	0.0681345	0.512346	3.38309	9.9681	0.992077	4.3109	0.665389	4.51078	2.21513	6.94454	10.7772	3.32695	198.504	28.355	1.74652	-1.06097	2.80749	WASH2P	-	chr1_186965_-
chr3:19993340-19993566:mpeak_48187|chr3_19988571_20025199_RAB5A_NM_+|	332.96	-1.78055	0.976509	-1.82338	0.0682455	0.512346	4.51078	0	2.97623	6.46634	12.6424	583.019	732.101	555.563	788.894	643.431	0.342994	1.11098	-1.70665	-0.0110798	-1.69557	RAB5A	-	chr3_19951897_+;chr3_19951927_+;chr3_19952002_+
chr3:142122714-142122840:mpeak_50948|chr3_142030655_142166904_XRN1_NM_-|	24.2688	1.17694	0.645543	1.82319	0.0682753	0.512346	22.5539	28.7967	13.8891	12.9327	7.98467	27.0647	35.4421	28.7702	36.6426	28.6117	82.1521	37.0184	1.14599	-0.00406196	1.15005	XRN1	-	-
chr20:46364701-46364806:mpeak_44783|chr20_46287136_46415360_SULF2_NM_-|	385.585	-2.96376	1.62581	-1.82294	0.068312	0.512346	1.1277	0	4.96039	0	9.31545	666.468	714.38	747.034	655.256	1057.3	0.0816669	0.580414	-3.07716	-0.247903	-2.82926	SULF2	-	-
chr22:50829214-50829273:mpeak_47641|chr22_50781745_50882627_PPP6R2_NM_+|	86.9625	-0.956552	0.524802	-1.82269	0.0683503	0.512346	125.174	71.9918	175.598	169.203	122.432	42.8524	49.8405	35.7148	35.5649	41.2541	212.709	415.193	-0.659765	0.305135	-0.964901	PPP6R2	-	-
chr17:4784268-4784348:mpeak_29595|chr17_4736634_4800498_MINK1_NM_+|	16.6463	1.51717	0.833092	1.82113	0.0685872	0.513636	15.7877	8.86053	11.9049	4.3109	9.31545	10.1493	18.8286	28.7702	31.254	27.281	85.0589	29.2437	0.534184	-1.00615	1.54034	MINK1	-	-
chr2:70452340-70452406:mpeak_39541|chr2_70439977_70475779_TIA1_NM_-|	37.0965	1.87056	1.02737	1.82073	0.0686475	0.513636	4.51078	3.3227	0.992077	9.69951	2.66156	29.3201	21.0438	125.994	100.228	73.1928	15.5538	4.45975	-0.184492	-1.98672	1.80223	TIA1	chr2:70452336:-	chr2_70225207_-
chr19:38398323-38398384:mpeak_36426|chr19_38397860_38696736_SIPA1L3_NM_+|	18.3065	-2.97446	1.63444	-1.81987	0.0687795	0.514155	0	1.10757	4.96039	2.15545	1.99617	46.2355	39.8724	25.794	32.3317	28.6117	1.28625	10.5053	-2.45541	0.574453	-3.02987	SIPA1L3	chr19:38398377:+	chr19_37907736_+
chr2:180845919-180845975:mpeak_42005|chr2_180810442_180871780_CWC22_NM_-|	14.9433	1.64442	0.903913	1.81923	0.068877	0.514415	7.89387	4.43027	3.96831	3.23317	2.66156	21.4262	15.5059	28.7702	26.9431	34.6002	33.3697	10.9209	0.906345	-0.705103	1.61145	CWC22	chr2:180845921:-	chr2_179981198_-
chr12:77237008-77237058:mpeak_17394|chr12_77157853_77244626_ZDHHC17_NM_+|	32.7482	-2.22003	1.22065	-1.81872	0.068954	0.514522	1.1277	1.10757	5.95246	3.23317	1.99617	82.3218	73.0994	48.6118	52.8085	57.2235	1.4382	7.04837	-1.73767	0.555355	-2.29303	ZDHHC17	chr12:77237061:+	chr12_76843278_+
chr20:52590959-52591022:mpeak_45072|chr20_52561535_52687304_BCAS1_NM_-|	144.516	-3.34456	1.84074	-1.81696	0.0692231	0.514658	0	0	0	0	7.98467	187.197	264.708	248.019	328.706	408.549	0	0.810401	-Inf	-0.53954	-Inf	BCAS1	chr20:52590953:-;chr20:52590985:-	chr20_53974446_-
chr9:129752450-129752503:mpeak_72992|chr9_129677052_129981018_RALGPS1_NM_+|	8.72075	-2.80609	1.54473	-1.81656	0.0692848	0.514658	1.1277	1.10757	0.992077	6.46634	4.65772	10.1493	31.0119	6.94454	10.7772	13.9732	5.43052	38.2274	-1.85345	0.961992	-2.81544	RALGPS1	chr9:129752502:+	chr9_126990222_+
chr3:49065713-49065763:mpeak_48947|chr3_49061837_49066875_IMPDH2_NM_-|	159.982	1.56204	0.859948	1.81643	0.0693041	0.514658	7.89387	3.3227	2.97623	5.38862	0	243.582	299.043	315.481	398.758	323.379	2.06709	0.806159	1.00818	-0.350284	1.35847	IMPDH2	chr3:49065681:-	chr3_49028248_-
chr6:30690168-30690313:mpeak_60785|chr6_30687977_30691715_TUBB_NR_+mpeak_60785|chr6_30687977_30691116_TUBB_NM_+||	7.94176	2.601	1.43194	1.81641	0.0693075	0.514658	10.1493	18.8286	4.96039	8.62179	4.65772	6.76617	0	14.8812	3.23317	7.31928	428.276	71.7157	1.25282	-1.32536	2.57818	TUBB	-	chr6_30722558_+
chr9:94830271-94830385:mpeak_71862|chr9_94794840_94877756_SPTLC1_NM_-|	847.515	1.57413	0.866643	1.81635	0.069317	0.514658	2.25539	12.1832	0	4.3109	3.99233	1290.08	1766.57	1483.16	1793.33	2119.26	0.472367	0.153885	1.38315	-0.234909	1.61806	SPTLC1	-	-
chr4:76837854-76838011:mpeak_53849|chr4_76832506_76862166_NAAA_NM_-|	98.3006	1.4394	0.792557	1.81614	0.0693484	0.514658	239.071	256.955	132.938	154.115	153.039	5.63848	7.75296	5.95246	21.5545	5.9885	3704.06	1313.89	0.757574	-0.737691	1.49527	NAAA	-	chr4_75916696_-;chr4_75916822_-
chr12:46590738-46590797:mpeak_15993|chr12_46582854_46663208_SLC38A1_NM_-|	1683.06	0.920995	0.507289	1.81552	0.0694439	0.514901	19.1708	14.3984	9.92077	9.69951	10.6462	3475.56	2691.39	3809.58	3213.77	3576.47	0.544341	0.285538	0.734378	-0.196449	0.930827	SLC38A1	chr12:46590744:-	chr12_46196964_-;chr12_46197013_-
chr1:35816824-35816893:mpeak_1487|chr1_35734567_35885070_ZMYM4_NM_+|	35.8675	1.60617	0.885196	1.81448	0.0696045	0.515049	9.02157	5.53783	3.96831	3.23317	0	66.534	78.6372	56.5484	64.6634	70.5312	10.0291	3.7558	1.60055	0.183544	1.417	ZMYM4	chr1:35816892:+	-
chr17:7588565-7588629:mpeak_29807|chr17_7573008_7590868_TP53_NM_-|	229.692	-3.17431	1.74977	-1.81413	0.0696575	0.515049	1.1277	0	0.992077	1.07772	11.977	333.798	571.504	437.506	433.245	505.696	0.124566	1.02051	-3.05383	-0.0195151	-3.03431	TP53	chr17:7588533:-;chr17:7588567:-	chr17_7685235_-
chr19:37835647-37835709:mpeak_36393|chr19_37825579_37853010_HKR1_NM_+|	5.28572	-2.96611	1.63518	-1.81394	0.0696874	0.515049	2.25539	0	4.96039	3.23317	5.9885	3.38309	16.6135	3.96831	6.46634	5.9885	11.2789	86.3541	-2.06765	0.868985	-2.93664	HKR1	chr19:37835706:+	chr19_37344802_+
chr17:38289291-38289348:mpeak_31027|chr17_38278789_38290531_MSL1_NM_+|	80.702	-1.49358	0.823499	-1.8137	0.0697241	0.515049	4.51078	3.3227	10.9129	1.07772	9.31545	201.858	186.071	141.867	133.638	114.447	2.01931	5.46376	-0.858573	0.577458	-1.43603	MSL1	-	chr17_40133104_+
chr17:79803542-79803626:mpeak_33249|chr17_79801968_79818544_P4HB_NM_-|	1045.08	1.36394	0.752167	1.81335	0.0697776	0.515049	7.89387	5.53783	3.96831	0	3.32695	2017.45	2164.18	2037.73	2396.86	1813.85	0.321207	0.116753	1.46557	0.00553367	1.46004	P4HB	chr17:79803555:-	-
chr17:687186-687313:mpeak_29299|chr17_685512_694773_RNMTL1_NM_+|	29.4252	-2.33029	1.28575	-1.8124	0.0699245	0.515236	1.1277	1.10757	1.98415	4.3109	5.9885	77.811	53.1632	68.4533	37.7203	42.5849	1.70664	8.25737	-1.87325	0.401272	-2.27452	RNMTL1	chr17:687238:+;chr17:687307:+	chr17_783923_+;chr17_784010_+;chr17_784073_+
chr11:31471005-31471055:mpeak_11977|chr11_31454115_31531175_IMMP1L_NM_-|	93.8078	-3.40028	1.87623	-1.8123	0.0699406	0.515236	0	0	0	0	7.31928	159.005	159.49	121.033	276.975	214.255	0	1.19545	-Inf	-0.357922	-Inf	IMMP1L	chr11:31470999:-;chr11:31471042:-	chr11_31449495_-
chr19:6381128-6381184:mpeak_35001|chr19_6380496_6393291_GTF2F1_NM_-|	91.607	1.94651	1.07425	1.81197	0.0699912	0.515236	37.214	4.43027	10.9129	6.46634	1.99617	157.877	153.952	215.281	156.27	171.67	13.3548	3.56675	1.68886	-0.215821	1.90468	GTF2F1	chr19:6381133:-	-
chr5:153667907-153667973:mpeak_59157|chr5_153570294_153796373_GALNT10_NM_+|	87.6527	-1.81307	1.00122	-1.81086	0.070163	0.516038	3.38309	0	6.94454	3.23317	3.32695	204.113	201.577	149.804	158.425	145.72	0.833909	2.97493	-1.41208	0.422809	-1.83489	GALNT10	chr5:153667966:+	-
chr19:52911717-52911767:mpeak_37312|chr19_52901120_52918376_ZNF528_NM_+|	5.02514	3.08976	1.70696	1.81009	0.0702811	0.516444	4.51078	5.53783	0.992077	7.54407	1.33078	0	3.3227	10.9129	10.7772	5.32311	302.423	36.5263	0.611287	-2.43827	3.04956	ZNF528	chr19:52911771:+	-
chr7:42115797-42115889:mpeak_64878|chr7_42006239_42276618_GLI3_NM_-|	9.26805	-4.03143	2.22893	-1.80869	0.0704996	0.517247	0	0	0	0	7.31928	13.5323	25.474	11.9049	20.4768	13.9732	0	15.7897	-Inf	0.335952	-Inf	GLI3	-	chr7_42076226_-
chr2:162019044-162019100:mpeak_41538|chr2_161993465_162091852_TANK_NM_+|	9.05867	2.64069	1.46058	1.80797	0.0706112	0.517247	1.1277	12.1832	0.992077	1.07772	0.665389	13.5323	19.9362	9.92077	11.855	19.2963	39.7715	6.6595	2.86786	0.289612	2.57825	TANK	chr2:162019095:+	chr2_161162583_+
chr16:9199305-9199362:mpeak_26763|chr16_9185536_9210524_C16orf72_NM_+|	49.7773	-2.44899	1.35462	-1.80787	0.070626	0.517247	2.25539	0	6.94454	0	7.31928	86.8326	129.585	60.5167	113.161	91.1583	1.04215	5.38591	-2.07595	0.293682	-2.36963	C16orf72	chr16:9199306:+	-
chr20:46317593-46317644:mpeak_44770|chr20_46287136_46415360_SULF2_NM_-|	387.263	-2.21817	1.22722	-1.80748	0.0706874	0.517247	1.1277	2.21513	3.96831	21.5545	3.32695	666.468	714.38	747.034	655.256	1057.3	0.242085	1.17295	-2.52445	-0.247903	-2.27655	SULF2	chr20:46317592:-	chr20_47688852_-
chr11:116763464-116763535:mpeak_14285|chr11_116716345_116969131_SIK3_NM_-|	10.2365	-3.36121	1.85973	-1.80736	0.0707055	0.517247	0	1.10757	0	4.3109	3.99233	13.5323	39.8724	12.897	14.0104	12.6424	2.07391	20.9944	-2.32132	1.01826	-3.33958	SIK3	chr11:116763477:-	chr11_116892762_-
chr1:184671940-184672077:mpeak_6027|chr1_184663606_184724041_EDEM3_NM_-|	136.051	1.79423	0.993044	1.8068	0.0707929	0.517425	22.5539	4.43027	0.992077	0	3.99233	399.204	362.174	204.368	155.192	207.601	3.54412	0.878835	3.02158	1.00982	2.01176	EDEM3	-	chr1_184702823_-
chr5:158621716-158621762:mpeak_59263|chr5_158586043_158637061_RNF145_NM_-|	43.5708	2.17979	1.20736	1.80542	0.0710088	0.517484	5.63848	1.10757	0	10.7772	4.65772	15.7877	21.0438	88.2949	165.969	122.432	18.316	4.09746	-0.609126	-2.76943	2.1603	RNF145	-	-
chr3:160146567-160146738:mpeak_51377|chr3_160117091_160151444_SMC4_NM_+|	103.994	1.62724	0.901989	1.80405	0.0712231	0.517484	15.7877	2.21513	2.97623	1.07772	4.65772	186.07	203.792	162.701	214.467	246.194	4.61776	1.39753	1.63217	-0.0921435	1.72431	SMC4	-	-
chr15:48449322-48449376:mpeak_24424|chr15_48446090_48470558_MYEF2_NR_-mpeak_24424|chr15_48435268_48470558_MYEF2_NM_-||	50.2638	1.94421	1.07806	1.80344	0.0713188	0.517484	1.1277	19.9362	1.98415	2.15545	5.32311	90.2157	77.5296	88.2949	105.617	110.455	12.5571	3.10899	1.73941	-0.274574	2.01398	MYEF2	chr15:48449324:-	chr15_48157128_-
chr22:47107353-47107403:mpeak_47589|chr22_47083103_47134152_CERK_NM_-|	19.1111	-3.9294	2.17921	-1.80313	0.0713683	0.517484	0	0	0	0	7.98467	16.9154	59.8086	30.7544	37.7203	37.9272	0	7.50425	-Inf	0.113189	-Inf	CERK	-	-
chr2:26571337-26571497:mpeak_38338|chr2_26568953_26611872_EPT1_NM_+|	172.126	-2.48026	1.37581	-1.80277	0.0714247	0.517484	2.25539	0	4.96039	9.69951	0	455.589	363.282	303.576	247.876	334.025	0.275427	1.65559	-2.11546	0.472143	-2.58761	EPT1	chr2:26571498:+	chr2_26348629_+
chr2:64090017-64090065:mpeak_39324|chr2_64068097_64118253_UGP2_NM_+|	73.5793	-3.7512	2.081	-1.80259	0.0714522	0.517484	0	0	0	10.7772	0	117.28	138.446	135.915	198.301	135.074	0	2.2965	-Inf	-0.290917	-Inf	UGP2	-	-
chr2:27656537-27656675:mpeak_38436|chr2_27651472_27664574_NRBP1_NM_+mpeak_38436|chr2_27651472_27664574_NRBP1_NM_+||	2057.32	1.19478	0.662925	1.80228	0.0715008	0.517484	32.7032	26.5816	25.794	6.46634	7.98467	3615.39	4474.57	4187.56	4338.92	3857.26	0.732819	0.324983	1.14381	-0.0292795	1.17309	NRBP1	chr2:27656663:+	-
chr14:31863237-31863287:mpeak_21281|chr14_31762818_31889788_HEATR5A_NM_-|	11.0574	-3.68284	2.04454	-1.80131	0.0716545	0.517484	0	0	0	4.3109	3.99233	33.8309	5.53783	28.7702	16.1659	17.9655	0	13.2003	-Inf	-0.0910853	-Inf	HEATR5A	chr14:31863233:-	chr14_31394030_-
chr4:109572108-109572230:mpeak_54567|chr4_109571740_109588402_OSTC_NM_+|	1724.55	-2.07918	1.15428	-1.80128	0.0716583	0.517484	1.1277	1.10757	7.93662	3.23317	3.99233	3175.59	3502.12	3016.91	4114.75	3418.77	0.0334735	0.143711	-2.17699	-0.0749122	-2.10208	OSTC	chr4:109572233:+	chr4_108651074_+
chr7:26245937-26246139:mpeak_64545|chr7_26240830_26251701_CBX3_NM_+|	1010.53	0.586999	0.325921	1.80105	0.0716951	0.517484	266.136	227.051	163.693	175.669	216.251	1646.44	1710.08	1691.49	2136.05	1872.4	14.6934	9.74769	0.413017	-0.17902	0.592037	CBX3	chr7:26246130:+	chr7_26206388_+;chr7_26206440_+;chr7_26206472_+
chr5:172355015-172355072:mpeak_59444|chr5_172261222_172377711_ERGIC1_NM_+|	1643.8	1.5552	0.863598	1.80083	0.0717289	0.517484	7.89387	3.3227	0	3.23317	1.99617	3881.53	3035.84	3482.19	2722.33	3299.66	0.162151	0.0550214	1.68589	0.126623	1.55927	ERGIC1	chr5:172355067:+	chr5_172928069_+
chr5:140054255-140054320:mpeak_58751|chr5_140053913_140071312_HARS_NM_-|	23.8629	-2.95676	1.6421	-1.80059	0.0717669	0.517484	0	1.10757	1.98415	1.07772	6.65389	54.1294	47.6254	40.6752	38.7981	46.5772	1.08847	7.70784	-2.54797	0.276057	-2.82403	HARS	-	-
chr18:29992140-29992240:mpeak_33981|chr18_29848731_30050447_GAREM_NM_-|	37.0679	-1.17995	0.655318	-1.80058	0.0717693	0.517484	9.02157	7.75296	16.8653	22.6322	10.6462	68.7894	64.2388	56.5484	54.9639	59.2196	12.6097	29.3699	-0.994835	0.224962	-1.2198	GAREM	-	-
chr8:145522511-145522571:mpeak_70565|chr8_145515269_145537787_HSF1_NM_+|	377.614	-2.85629	1.58734	-1.79942	0.0719529	0.517484	0	1.10757	4.96039	0	5.32311	756.684	832.89	620.048	928.998	626.131	0.0696769	0.472766	-2.6299	0.132469	-2.76237	HSF1	-	-
chr2:139264447-139264589:mpeak_41194|chr2_139259349_139326505_SPOPL_NM_+|	119.919	-2.78936	1.55032	-1.79922	0.0719834	0.517484	1.1277	0	2.97623	8.62179	3.99233	178.176	223.728	233.138	258.654	288.779	0.280588	1.9973	-3.20424	-0.372715	-2.83153	SPOPL	-	chr2_138506953_+
chr11:31525819-31525880:mpeak_11978|chr11_31454115_31531175_IMMP1L_NM_-|	95.4385	-2.32775	1.29382	-1.79913	0.0719979	0.517484	0	2.21513	1.98415	10.7772	8.65006	159.005	159.49	121.033	276.975	214.255	0.695501	3.4971	-2.68796	-0.357922	-2.33003	IMMP1L	chr11:31525828:-	chr11_31504279_-
chr7:1489150-1489213:mpeak_63938|chr7_1474308_1499109_MICALL2_NM_-|	19.9452	-2.32805	1.294	-1.79911	0.0720016	0.517484	0	2.21513	4.96039	7.54407	5.32311	41.7247	27.6892	34.7227	50.653	24.6194	3.19119	16.2076	-2.42368	-0.0791806	-2.3445	MICALL2	chr7:1489153:-	chr7_1449507_-
chr5:126866037-126866091:mpeak_58180|chr5_126853300_126887398_PRRC1_NM_+|	131.784	1.29959	0.722367	1.79907	0.0720074	0.517484	5.63848	14.3984	5.95246	2.15545	6.65389	212.007	232.589	210.32	306.074	322.048	4.50676	1.76062	1.02575	-0.330255	1.356	PRRC1	-	-
chr13:99077551-99077634:mpeak_20586|chr13_98794815_99100489_FARP1_NM_+|	57.5435	-2.90871	1.61705	-1.79878	0.0720535	0.517484	0	1.10757	0	5.38862	3.32695	145.473	131.8	118.057	93.762	76.5197	0.39945	3.02268	-2.39124	0.528505	-2.91974	FARP1	chr13:99077603:+;chr13:99077638:+	-
chr21:40684105-40684176:mpeak_45983|chr21_40569341_40685712_BRWD1_NM_-|	55.5742	-2.01126	1.11866	-1.79793	0.0721888	0.517484	2.25539	1.10757	2.97623	14.0104	3.32695	112.77	106.326	102.184	119.627	91.1583	1.53492	6.49059	-2.00968	0.0705026	-2.08018	BRWD1	chr21:40684103:-	chr21_39312200_-
chr14:104171326-104171384:mpeak_23619|chr14_104165354_104181823_XRCC3_NM_-|	3.10717	3.75653	2.08941	1.79789	0.0721941	0.517484	4.51078	4.43027	7.93662	1.07772	4.65772	0	0	2.97623	2.15545	3.32695	#DIV/0!	161.635	-0.027753	-Inf	Inf	XRCC3	chr14:104171329:-	chr14_103704995_-
chr1:156562598-156562648:mpeak_5123|chr1_156561557_156563673_APOA1BP_NM_+|	587.481	-2.77885	1.54588	-1.79758	0.0722433	0.517484	0	1.10757	5.95246	2.15545	2.66156	1135.59	1335.73	1114.1	1227.53	1049.98	0.0448169	0.317532	-2.69652	0.128269	-2.82479	APOA1BP	chr1:156562618:+;chr1:156562645:+	chr1_156592852_+
chr16:89593801-89593851:mpeak_29173|chr16_89574795_89623294_SPG7_NM_+|	107.707	-2.83569	1.57766	-1.7974	0.0722715	0.517484	0	1.10757	3.96831	5.38862	1.33078	226.667	250.31	211.312	216.622	160.359	0.232205	1.81673	-2.68552	0.282345	-2.96787	SPG7	chr16:89593852:+	chr16_89527443_+
chr14:68154953-68155005:mpeak_22376|chr14_68145140_68162510_RDH11_NM_-|	318.238	-2.81454	1.56612	-1.79714	0.0723141	0.517484	0	1.10757	3.96831	2.15545	3.99233	674.362	691.121	474.213	603.525	727.936	0.0811117	0.560239	-2.60622	0.181837	-2.78806	RDH11	chr14:68154942:-	chr14_67688226_-;chr14_67688288_-
chr7:105112489-105112545:mpeak_66344|chr7_105098373_105162685_PUS7_NM_-|	14.8381	-3.35357	1.86657	-1.79665	0.0723908	0.517582	1.1277	0	0	1.07772	7.98467	37.214	36.5497	22.8178	18.3213	23.2886	1.5288	14.066	-2.42155	0.780191	-3.20174	PUS7	chr7:105112488:-	chr7_105472042_-;chr7_105472077_-
chr1:2323870-2323944:mpeak_156|chr1_2323213_2334473_RER1_NM_+|	308.858	-2.81006	1.56484	-1.79575	0.0725349	0.518161	1.1277	0	9.92077	0	3.99233	559.337	544.923	621.04	713.453	634.781	0.102122	0.706509	-3.04003	-0.249622	-2.79041	RER1	chr1:2323939:+	chr1_2392513_+
chr4:95471015-95471128:mpeak_54234|chr4_95373007_95585128_PDLIM5_NM_+|	340.631	0.909391	0.506711	1.79469	0.0727025	0.518906	31.5755	32.1194	16.8653	39.8758	29.2771	433.035	489.544	765.884	893.433	674.705	6.904	3.68541	0.151498	-0.75411	0.905608	PDLIM5	chr4:95471123:+	chr4_94549971_+
chr1:226568760-226568882:mpeak_7147|chr1_226549242_226595801_PARP1_NM_-|	120.484	-0.808755	0.450918	-1.79357	0.0728813	0.519585	47.3632	46.5178	81.3503	63.5857	60.5504	204.113	199.362	125.002	185.368	191.632	23.2681	40.9334	-0.545176	0.269747	-0.814923	PARP1	-	chr1_226381072_-
chr4:83784363-83784553:mpeak_54019|chr4_83740406_83812433_SEC31A_NM_-|	215.007	0.715758	0.399128	1.7933	0.0729242	0.519585	40.597	55.3783	30.7544	30.1763	29.2771	360.863	412.015	447.427	378.281	365.299	12.4179	7.57408	0.674375	-0.0389076	0.713282	SEC31A	chr4:83784364:-;chr4:83784389:-	-
chr13:41639148-41639223:mpeak_19830|chr13_41635696_41656839_WBP4_NM_+|	47.9551	1.06855	0.596103	1.79256	0.0730436	0.519984	18.0431	42.0875	13.8891	17.2436	19.9617	63.151	68.6691	74.4058	77.5961	84.5044	45.6157	21.6038	0.8199	-0.258346	1.07825	WBP4	-	chr13_41065062_+
chr1:117963196-117963280:mpeak_3956|chr1_117910084_118065446_MAN1A2_NM_+|	163.066	0.871383	0.48636	1.79164	0.0731904	0.520578	98.1095	76.4221	95.2394	81.907	60.5504	213.134	137.338	281.75	252.187	334.025	49.7989	27.3856	0.139328	-0.723368	0.862696	MAN1A2	-	-
chr6:38654660-38654713:mpeak_61270|chr6_38645159_38670952_GLO1_NM_-|	500.625	-2.75837	1.54073	-1.7903	0.0734051	0.521576	0	1.10757	4.96039	0	7.31928	923.583	859.471	1099.22	1048.63	1061.96	0.0621162	0.382567	-2.88584	-0.263174	-2.62267	GLO1	-	-
chr16:72131564-72131645:mpeak_28601|chr16_72127614_72146311_DHX38_NM_+|	310.006	1.08912	0.608503	1.78984	0.0734804	0.521576	50.7463	32.1194	26.7861	15.0881	15.9693	475.888	718.811	419.649	633.702	711.301	6.93612	3.2779	1.10358	0.0222255	1.08136	DHX38	-	-
chr17:11887324-11887374:mpeak_29952|chr17_11882061_11900827_ZNF18_NM_-|	10.9346	-3.80394	2.1256	-1.78958	0.0735213	0.521576	0	0	0	0	7.31928	22.5539	19.9362	21.8257	15.0881	22.6232	0	12.2937	-Inf	0.0983014	-Inf	ZNF18	-	-
chr3:99890669-99890718:mpeak_49783|chr3_99536677_99897148_CMSS1_NM_+|	195.318	1.46798	0.820694	1.78871	0.0736622	0.521855	9.02157	4.43027	2.97623	0	3.32695	374.395	425.305	304.568	455.877	373.283	1.68211	0.555969	1.67861	0.0814192	1.59719	CMSS1	-	-
chr1:114140092-114140142:mpeak_3672|chr1_113933474_114224833_MAGI3_NM_+|	30.614	-3.47031	1.9403	-1.78855	0.0736879	0.521855	0	0	0	0	6.65389	53.0017	59.8086	54.5643	40.9535	91.1583	0	3.5644	-Inf	-0.141676	-Inf	MAGI3	-	-
chr17:55918367-55918428:mpeak_31918|chr17_55917296_55927433_MRPS23_NM_-|	234.972	1.27677	0.714393	1.78721	0.0739028	0.522926	12.4047	7.75296	4.96039	7.54407	1.99617	393.566	488.437	397.823	592.748	442.484	2.28544	1.01187	1.06017	-0.115277	1.17545	MRPS23	-	-
chr15:63354730-63354846:mpeak_24990|chr15_63334837_63363288_TPM1_NM_+|	279.074	0.918707	0.514624	1.7852	0.0742286	0.523241	24.8093	17.7211	23.8099	18.3213	14.6386	449.951	321.194	634.93	709.142	576.227	5.51522	2.9563	0.168334	-0.731295	0.899629	TPM1	chr15:63354786:+	chr15_63062579_+;chr15_63062642_+
chr12:46316479-46316534:mpeak_15961|chr12_46315977_46384401_SCAF11_NM_-|	265.547	1.06207	0.594949	1.78515	0.0742369	0.523241	19.1708	11.0757	5.95246	11.855	11.3116	372.14	484.006	469.253	641.246	629.458	3.53287	1.67355	0.639767	-0.43816	1.07793	SCAF11	chr12:46316477:-	chr12_45922696_-
chr1:211571646-211571739:mpeak_6698|chr1_211556096_211605660_LINC00467_NR_+|	26.9846	-1.43096	0.801951	-1.78435	0.0743664	0.523241	28.1924	19.9362	16.8653	21.5545	10.6462	54.1294	70.8842	19.8415	20.4768	7.31928	38.4987	102.999	0.557132	1.97688	-1.41974	LINC00467	chr1:211571663:+;chr1:211571698:+;chr1:211571731:+	chr1_211398354_+;chr1_211398388_+
chr9:132266135-132266207:mpeak_73178|chr9_132250938_132275697_LINC00963_NR_+|	5.20949	-3.53032	1.97862	-1.78424	0.0743854	0.523241	1.1277	0	5.95246	3.23317	6.65389	6.76617	8.86053	0.992077	11.855	6.65389	7.21646	81.2245	-3.22712	0.265433	-3.49255	LINC00963	chr9:132266171:+;chr9:132266207:+	chr9_129503880_+;chr9_129503906_+;chr9_129503952_+
chr2:234464825-234464879:mpeak_43233|chr2_234386149_234474236_USP40_NM_-|	67.498	-1.66569	0.933605	-1.78415	0.0743993	0.523241	4.51078	1.10757	1.98415	6.46634	12.6424	140.962	146.199	119.049	119.627	122.432	1.95652	5.84115	-1.32358	0.25439	-1.57797	USP40	chr2:234464824:-	chr2_233556179_-
chr18:21600193-21600272:mpeak_33849|chr18_21572736_21712448_TTC39C_NM_+|	18.542	1.31713	0.738251	1.78412	0.0744042	0.523241	14.66	25.474	17.8574	18.3213	19.2963	13.5323	6.6454	26.7861	21.5545	21.2925	198.903	79.6676	0.117953	-1.20204	1.32	TTC39C	chr18:21600252:+	chr18_24020308_+
chr4:57356561-57356611:mpeak_53627|chr4_57333761_57367849_SRP72_NM_+|	235.784	-2.77096	1.55342	-1.78378	0.0744595	0.523241	0	1.10757	4.96039	1.07772	3.32695	480.398	560.429	422.625	472.043	411.876	0.106412	0.716781	-2.49493	0.256937	-2.75187	SRP72	-	-
chr10:82269968-82270031:mpeak_9681|chr10_82214037_82277660_TSPAN14_NM_+|	188.14	-1.06565	0.597493	-1.78354	0.0744992	0.523241	15.7877	11.0757	11.9049	25.8654	33.2695	396.949	383.218	311.512	335.172	356.649	3.44329	7.08038	-0.818022	0.222017	-1.04004	TSPAN14	chr10:82270026:+;chr10:82270056:+	chr10_80510286_+
chr19:2824538-2824588:mpeak_34784|chr19_2819871_2833678_ZNF554_NM_+|	8.85847	-3.93917	2.2088	-1.7834	0.0745211	0.523241	0	0	0	0	6.65389	13.5323	24.3665	10.9129	20.4768	12.6424	0	15.1115	-Inf	0.368563	-Inf	ZNF554	chr19:2824597:+;chr19:2824625:+	chr19_2824598_+;chr19_2824642_+
chr10:70741288-70741338:mpeak_9252|chr10_70715878_70742298_DDX21_NM_+|	992.503	-2.78462	1.56208	-1.78264	0.0746457	0.523668	1.1277	0	3.96831	1.07772	5.32311	1941.89	2109.91	1902.8	2352.67	1606.25	0.0278319	0.176896	-2.61588	0.0522023	-2.66809	DDX21	-	-
chr5:158636227-158636280:mpeak_59264|chr5_158586043_158637061_RNF145_NM_-|	50.8178	1.24935	0.701528	1.7809	0.0749293	0.525188	7.89387	9.9681	22.8178	28.0208	25.9502	15.7877	21.0438	88.2949	165.969	122.432	48.4964	20.3848	-1.51904	-2.76943	1.25038	RNF145	-	-
chr17:44246950-44247007:mpeak_31467|chr17_44109069_44302740_KANSL1_NM_-|	12.0988	-3.90825	2.19588	-1.77981	0.0751066	0.525188	0	1.10757	0	0	9.98084	28.1924	38.7648	12.897	19.399	10.6462	1.65414	23.2425	-2.58681	1.2258	-3.81261	KANSL1	-	chr17_46169604_-
chr16:67699727-67699780:mpeak_28243|chr16_67697224_67700628_ENKD1_NM_-|	11.4526	-2.48285	1.39506	-1.77975	0.0751168	0.525188	1.1277	1.10757	3.96831	3.23317	10.6462	12.4047	25.474	15.8732	19.399	21.2925	5.90111	31.5527	-2.41226	0.00644602	-2.41871	ENKD1	chr16:67699728:-	chr16_67665825_-
chr9:109765572-109765673:mpeak_72342|chr9_109625377_109773103_ZNF462_NM_+|	22.5068	-1.72555	0.969549	-1.77974	0.0751182	0.525188	7.89387	3.3227	15.8732	6.46634	17.9655	50.7463	32.1194	27.7782	18.3213	44.5811	13.5358	44.4473	-1.26037	0.454945	-1.71531	ZNF462	-	chr9_107003389_+
chr1:27630462-27630525:mpeak_1122|chr1_27561006_27632676_WDTC1_NM_+|	33.8024	-3.26464	1.8362	-1.77794	0.0754145	0.52681	0	0	0	1.07772	7.31928	32.7032	65.3464	59.5246	86.2179	85.8352	0	3.626	-Inf	-0.654951	-Inf	WDTC1	chr1:27630526:+	chr1_27304021_+
chr9:96063545-96063604:mpeak_71922|chr9_95947211_96082648_WNK2_NM_+|	6.70555	-3.72079	2.09324	-1.77753	0.0754815	0.52683	1.1277	0	11.9049	7.54407	2.66156	5.63848	12.1832	0.992077	9.69951	15.3039	6.32765	85.0552	-3.70832	0.0403339	-3.74866	WNK2	chr9:96063601:+	chr9_93301318_+
chr9:86589456-86589509:mpeak_71708|chr9_86584355_86595569_HNRNPK_NM_-mpeak_71708|chr9_86584355_86595569_HNRNPK_NM_-||	1346.63	-1.31281	0.739621	-1.77498	0.0759018	0.529133	4.51078	3.3227	10.9129	11.855	6.65389	2395.23	3050.24	2173.64	2860.28	2949.67	0.143853	0.368527	-1.32419	0.0329796	-1.35717	HNRNPK	-	chr9_83974554_-;chr9_83974585_-
chr15:42853834-42853904:mpeak_24222|chr15_42841010_42858804_HAUS2_NM_+|	111.855	-1.31191	0.739293	-1.77455	0.0759716	0.529133	10.1493	3.3227	29.7623	24.7876	13.9732	215.39	127.37	250.996	233.866	208.932	3.93044	9.87659	-1.76167	-0.432346	-1.32932	HAUS2	chr15:42853888:+	chr15_42561706_+
chr5:70937128-70937248:mpeak_57048|chr5_70883114_70952569_MCCC2_NM_+|	158.977	1.00235	0.56502	1.77402	0.0760606	0.529133	63.151	115.187	36.7069	45.2644	60.5504	219.901	265.816	210.32	337.328	235.548	36.7164	18.1975	0.908394	-0.104296	1.01269	MCCC2	chr5:70937195:+;chr5:70937247:+	chr5_71641367_+;chr5_71641419_+
chr10:38326975-38327047:mpeak_8680|chr10_38299577_38343302_ZNF33A_NM_+|	81.7408	-1.36588	0.769959	-1.77396	0.0760693	0.529133	5.63848	3.3227	2.97623	6.46634	10.6462	221.028	190.501	123.018	112.083	141.728	2.17753	5.33102	-0.579669	0.71205	-1.29172	ZNF33A	chr10:38327036:+	chr10_38038107_+
chr13:113887608-113887660:mpeak_20763|chr13_113862506_113917800_CUL4A_NM_+|	188.587	-2.13525	1.20491	-1.77213	0.0763723	0.530216	1.1277	1.10757	7.93662	1.07772	5.32311	371.012	377.68	290.679	475.276	354.652	0.298556	1.27944	-2.09631	0.00312598	-2.09944	CUL4A	-	-
chr19:58766939-58766989:mpeak_37717|chr19_58740069_58772216_ZNF544_NM_+|	25.4476	-3.89787	2.19979	-1.77193	0.0764065	0.530216	0	0	0	0	9.31545	56.3848	36.5497	82.3424	45.2644	24.6194	0	6.11948	-Inf	-0.126969	-Inf	ZNF544	-	-
chr10:90991637-90991697:mpeak_9853|chr10_90974818_91011796_LIPA_NM_-|	79.8446	-2.84706	1.60682	-1.77185	0.0764188	0.530216	1.1277	0	0	5.38862	4.65772	136.451	208.222	129.962	156.27	156.366	0.327178	2.26985	-2.57026	0.224195	-2.79445	LIPA	-	chr10_89231864_-
chr12:93171868-93171960:mpeak_17637|chr12_93169909_93323107_EEA1_NM_-|	29.7413	2.22222	1.25459	1.77127	0.0765153	0.530437	2.25539	8.86053	0	0	1.99617	66.534	71.9918	28.7702	57.1194	59.885	8.02444	1.36935	3.06229	0.511378	2.55091	EEA1	-	-
chr7:134347806-134347960:mpeak_66895|chr7_134331530_134363604_BPGM_NM_+|	12.9065	-2.34651	1.32627	-1.76926	0.0768507	0.531224	0	2.21513	8.9287	2.15545	5.9885	18.0431	25.474	18.8495	24.7876	22.6232	5.09025	25.766	-2.36126	-0.021599	-2.33966	BPGM	chr7:134347860:+	chr7_134663107_+
chr11:115068982-115069032:mpeak_14269|chr11_115047312_115375241_CADM1_NM_-|	178.065	1.47485	0.833599	1.76925	0.0768514	0.531224	7.89387	2.21513	1.98415	0	5.9885	268.392	228.159	456.356	417.079	392.58	2.03585	0.629745	0.927471	-0.76532	1.69279	CADM1	chr11:115068977:-	chr11_115198261_-
chr1:202742373-202742423:mpeak_6378|chr1_202698301_202777549_KDM5B_NM_-|	122.801	-2.8045	1.58542	-1.76893	0.0769049	0.531224	0	1.10757	1.98415	0	5.32311	266.136	318.979	194.447	214.467	225.567	0.18929	1.15169	-2.13698	0.468106	-2.60508	KDM5B	-	-
chr19:53158705-53158757:mpeak_37350|chr19_53118050_53193834_ZNF83_NM_-|	13.3705	-3.33136	1.88342	-1.76878	0.0769308	0.531224	0	3.3227	7.93662	17.2436	0	39.4693	21.0438	9.92077	24.7876	9.98084	5.49087	56.3451	-2.3369	1.02228	-3.35918	ZNF83	chr19:53158706:-	-
chr7:150759003-150759053:mpeak_67301|chr7_150755298_150773373_SLC4A2_NM_+|	38.0902	-3.28245	1.85688	-1.76773	0.0771069	0.531224	0	0	0	0	6.65389	53.0017	75.3145	76.39	65.7412	103.801	0	2.70558	-Inf	-0.353592	-Inf	SLC4A2	-	-
chr1:155288250-155288315:mpeak_4979|chr1_155278538_155290199_FDPS_NM_+|	417.133	-0.911475	0.515665	-1.76757	0.0771326	0.531224	4.51078	13.2908	18.8495	23.7099	20.6271	708.193	715.488	857.155	868.645	940.86	1.25039	2.3695	-1.24265	-0.320446	-0.922202	FDPS	chr1:155288305:+	chr1_155318512_+
chr8:8210044-8210094:mpeak_67611|chr8_8176818_8239344_SGK223_NM_-|	15.9067	-3.64867	2.06429	-1.76752	0.077141	0.531224	0	0	0	0	7.98467	23.6816	32.1194	27.7782	35.5649	31.9387	0	8.38006	-Inf	-0.186945	-Inf	SGK223	-	-
chr7:157025322-157025458:mpeak_67473|chr7_156931654_157060278_UBE3C_NM_+|	195.452	-1.46612	0.829494	-1.76749	0.0771466	0.531224	4.51078	2.21513	2.97623	14.0104	5.32311	435.291	457.425	312.504	386.903	333.36	0.753422	2.16019	-1.14491	0.37472	-1.51963	UBE3C	chr7:157025383:+;chr7:157025457:+	chr7_157232762_+
chr6:88408120-88408260:mpeak_62199|chr6_88385325_88411985_AKIRIN2_NM_-|	24.3906	-1.56637	0.886509	-1.7669	0.0772455	0.531459	2.25539	4.43027	10.9129	14.0104	16.6347	34.9586	27.6892	32.7386	60.3525	39.9233	10.6718	31.2432	-2.05102	-0.501286	-1.54974	AKIRIN2	chr6:88408121:-	chr6_87698404_-;chr6_87698457_-
chr9:91992146-91992226:mpeak_71823|chr9_91977343_92094611_SEMA4D_NM_-|	31.1596	3.84838	2.17892	1.76619	0.0773641	0.531511	41.7247	73.0994	42.6593	60.3525	83.839	0	0	9.92077	0	0	#DIV/0!	1883.43	-0.117499	-Inf	Inf	SEMA4D	chr9:91992150:-	chr9_89377236_-
chr13:79197855-79197906:mpeak_20422|chr13_79191257_79233314_RNF219_NM_-|	13.0171	-2.00724	1.13664	-1.76594	0.0774064	0.531511	3.38309	1.10757	5.95246	14.0104	6.65389	14.66	25.474	20.8336	24.7876	13.3078	11.1891	45.1675	-1.98238	0.0308108	-2.01319	RNF219	chr13:79197854:-	chr13_78623720_-
chr3:160167230-160167311:mpeak_51388|chr3_160156974_160167626_TRIM59_NM_-|	24.3176	-2.31223	1.30953	-1.76569	0.0774472	0.531511	2.25539	1.10757	11.9049	3.23317	6.65389	25.937	68.6691	20.8336	42.0312	60.5504	3.55469	17.6575	-2.11103	0.201447	-2.31248	TRIM59	-	-
chr16:75675454-75675620:mpeak_28736|chr16_75661891_75681585_KARS_NM_-|	691.182	0.97382	0.552048	1.76401	0.0777299	0.533005	60.8956	33.227	31.7465	14.0104	21.9578	1294.59	1497.43	1094.26	1488.34	1375.36	3.37112	1.71085	1.06003	0.081518	0.978515	KARS	-	-
chr20:2988023-2988072:mpeak_43599|chr20_2844840_3018704_PTPRA_NM_+|	65.91	1.17739	0.66812	1.76225	0.0780274	0.534598	20.2985	7.75296	6.94454	6.46634	7.31928	134.196	93.0356	117.065	142.26	123.762	12.3449	5.41135	1.02131	-0.168548	1.18986	PTPRA	-	-
chr1:150598982-150599101:mpeak_4573|chr1_150595335_150602098_ENSA_NM_-|	1290.99	-2.74229	1.55739	-1.76082	0.0782682	0.535503	0	1.10757	4.96039	5.38862	1.33078	2947.8	2358.01	2285.75	2486.31	2819.25	0.0208746	0.153857	-2.81359	0.0681856	-2.88177	ENSA	-	-
chr18:9182459-9182526:mpeak_33535|chr18_9136750_9280938_ANKRD12_NM_+|	7.66091	3.51306	1.99552	1.76047	0.0783282	0.535503	14.66	7.75296	6.94454	17.2436	20.6271	0	0	0	5.38862	3.99233	#DIV/0!	477.725	-0.414689	-Inf	Inf	ANKRD12	-	chr18_9182489_+
chr7:116544263-116544445:mpeak_66571|chr7_116502562_116557780_CAPZA2_NM_+|	111.913	0.935141	0.531264	1.76022	0.078371	0.535503	48.4909	46.5178	34.7227	23.7099	13.9732	187.197	204.9	164.685	193.99	200.948	24.2309	12.9383	0.976917	0.0717197	0.905197	CAPZA2	-	chr7_116904367_+;chr7_116904382_+
chr12:12353309-12353367:mpeak_15243|chr12_12274354_12419811_LRP6_NM_-|	19.1394	-2.34829	1.33478	-1.75931	0.0785254	0.535503	1.1277	1.10757	2.97623	6.46634	1.33078	38.3417	56.4859	34.7227	21.5545	27.281	2.35719	12.8932	-1.68399	0.767488	-2.45148	LRP6	-	-
chr8:19192300-19192373:mpeak_67813|chr8_19171080_19252060_SH2D4A_NM_+|	28.4671	1.32484	0.753239	1.75886	0.0786007	0.535503	10.1493	5.53783	3.96831	8.62179	8.65006	24.8093	31.0119	55.5563	62.508	73.8582	28.1024	11.067	0.147746	-1.19668	1.34442	SH2D4A	chr8:19192368:+	chr8_19334856_+
chrX:41534060-41534152:mpeak_74213|chrX_41379849_41782287_CASK_NM_-|	52.3337	-1.35336	0.769865	-1.75792	0.0787604	0.535503	33.8309	53.1632	53.5722	89.4511	70.5312	36.0863	77.5296	18.8495	51.7307	38.5926	76.5686	195.611	-0.710653	0.642514	-1.35317	CASK	chrX:41534081:-	chrX_41674829_-
chr7:157028773-157028830:mpeak_67474|chr7_156931654_157060278_UBE3C_NM_+|	194.152	-1.74628	0.99354	-1.75764	0.0788092	0.535503	1.1277	2.21513	1.98415	5.38862	5.32311	435.291	457.425	312.504	386.903	333.36	0.374456	1.22931	-1.34026	0.37472	-1.71498	UBE3C	chr7:157028829:+	chr7_157236134_+
chr15:67815699-67815784:mpeak_25247|chr15_67813521_67818755_C15orf61_NM_+|	57.9219	1.67102	0.950936	1.75724	0.0788772	0.535503	5.63848	16.6135	4.96039	3.23317	4.65772	90.2157	100.789	57.5405	109.928	185.644	11.65	3.63944	1.37698	-0.301559	1.67854	C15orf61	chr15:67815782:+	chr15_67523443_+
chr6:136603719-136603781:mpeak_63038|chr6_136582253_136610989_BCLAF1_NM_-|	171.178	-1.35119	0.769021	-1.75703	0.0789133	0.535503	3.38309	3.3227	3.96831	12.9327	10.6462	286.435	353.314	343.259	349.183	345.337	1.04819	2.65444	-1.45347	-0.112959	-1.34051	BCLAF1	-	-
chr1:214795416-214795634:mpeak_6806|chr1_214776531_214836933_CENPF_NM_+|	31.4438	-1.35687	0.772327	-1.75687	0.0789408	0.535503	7.89387	4.43027	13.8891	26.9431	19.2963	45.1078	38.7648	46.6276	40.9535	70.5312	14.6939	38.0289	-1.7016	-0.329716	-1.37188	CENPF	-	chr1_214622187_+;chr1_214622212_+
chr12:64189452-64189503:mpeak_16985|chr12_64173582_64202454_TMEM5_NM_+|	63.2037	-2.12054	1.20711	-1.7567	0.0789685	0.535503	2.25539	0	1.98415	3.23317	5.9885	142.09	135.123	118.057	131.482	91.8237	0.813596	3.28267	-1.72784	0.284649	-2.01249	TMEM5	chr12:64189504:+	chr12_63795723_+
chr9:125861751-125861829:mpeak_72835|chr9_125703287_125865369_RABGAP1_NM_+|	253.807	1.06592	0.606949	1.75619	0.0790562	0.535503	18.0431	11.0757	8.9287	5.38862	5.9885	426.269	589.225	414.688	533.473	524.992	2.86745	1.37839	1.10502	0.0482367	1.05678	RABGAP1	-	chr9_123099549_+
chr14:31188543-31188593:mpeak_21231|chr14_31091459_31204791_SCFD1_NM_+|	157.463	1.28137	0.729702	1.75601	0.0790863	0.535503	14.66	6.6454	4.96039	3.23317	3.32695	331.543	337.808	228.178	376.126	268.152	3.183	1.32047	1.47198	0.202643	1.26934	SCFD1	-	chr14_30719354_+
chr9:37432760-37432811:mpeak_71293|chr9_37422706_37436657_GRHPR_NM_+|	109.439	-2.10198	1.19771	-1.755	0.0792589	0.535503	1.1277	1.10757	2.97623	7.54407	2.66156	258.242	211.545	224.209	162.736	222.24	0.475803	2.16385	-1.97508	0.210089	-2.18516	GRHPR	chr9:37432812:+	chr9_37432832_+
chr3:183732161-183732238:mpeak_51856|chr3_183639189_183735727_ABCC5_NM_-|	180.763	0.937517	0.534207	1.75497	0.0792644	0.535503	67.6617	42.0875	41.6673	30.1763	27.281	260.498	326.732	277.782	434.323	299.425	18.6893	9.79946	0.731861	-0.199579	0.931439	ABCC5	-	chr3_184014442_-
chr14:99929829-99929920:mpeak_23361|chr14_99865462_99947226_SETD3_NM_-|	295.333	0.577492	0.329186	1.75431	0.0793782	0.535503	83.4495	67.5615	57.5405	50.653	49.9042	520.995	512.803	514.888	517.307	578.223	14.6074	9.81718	0.5188	-0.0545182	0.573318	SETD3	-	-
chr4:170926143-170926194:mpeak_55516|chr4_170913460_170947581_MFAP3L_NM_-|	4.76137	-4.06177	2.31534	-1.75429	0.0793815	0.535503	0	0	0	2.15545	7.31928	12.4047	3.3227	3.96831	6.46634	11.977	0	42.2759	-Inf	0.073989	-Inf	MFAP3L	chr4:170926139:-	chr4_170004993_-
chr11:70253801-70253980:mpeak_13313|chr11_70244611_70281131_CTTN_NM_+|	2007.13	-0.847044	0.482885	-1.75413	0.0794079	0.535503	39.4693	57.5934	93.2553	63.5857	59.2196	3963.85	4885.48	2849.25	4070.56	3989.01	1.09684	1.98061	-0.569483	0.283107	-0.85259	CTTN	chr11:70253854:+;chr11:70253960:+	chr11_70407767_+;chr11_70407794_+;chr11_70407833_+;chr11_70407852_+
chr6:35587976-35588061:mpeak_61149|chr6_35543719_35696360_FKBP5_NM_-|	70.8952	1.89808	1.0823	1.75374	0.0794744	0.535503	20.2985	13.2908	13.8891	0	1.99617	135.323	106.326	159.724	147.648	110.455	13.9	3.80187	1.66528	-0.205026	1.8703	FKBP5	-	-
chr8:109455868-109455938:mpeak_69786|chr8_109455852_109498740_EMC2_NM_+|	186.594	-0.813771	0.464075	-1.75353	0.0795106	0.535503	90.2157	103.004	154.764	158.425	204.94	213.134	243.665	160.717	271.586	265.49	42.2985	74.2526	-0.83811	-0.0262773	-0.811833	EMC2	-	chr8_108443695_+
chr1:46499547-46499613:mpeak_2053|chr1_46269284_46500209_MAST2_NM_+|	54.1417	-1.67855	0.957527	-1.753	0.0796013	0.535503	3.38309	1.10757	8.9287	3.23317	7.98467	113.897	97.4658	94.2474	129.327	81.8429	2.12462	6.5964	-1.58057	0.0539053	-1.63448	MAST2	chr1:46499610:+	-
chr10:11798152-11798297:mpeak_8004|chr10_11784355_11805222_ECHDC3_NM_+|	21.9028	-1.38287	0.789289	-1.75204	0.0797663	0.535503	14.66	33.227	25.794	26.9431	34.6002	18.0431	31.0119	7.93662	16.1659	10.6462	97.6191	251.34	-0.282001	1.0824	-1.3644	ECHDC3	chr10:11798202:+;chr10:11798287:+;chr10:11798326:+	chr10_11756288_+
chr1:10132587-10132647:mpeak_379|chr1_10093040_10239952_UBE4B_NM_+|	52.9079	-1.84899	1.05542	-1.7519	0.0797914	0.535503	2.25539	1.10757	2.97623	2.15545	8.65006	118.408	109.649	83.3345	98.0729	102.47	1.47461	4.85482	-1.44999	0.26909	-1.71908	UBE4B	chr1:10132640:+	chr1_10072595_+
chr5:179326178-179326254:mpeak_59807|chr5_179291128_179334856_TBC1D9B_NM_-|	162.042	-2.89236	1.65101	-1.75188	0.079795	0.535503	1.1277	0	10.9129	0	2.66156	287.562	327.84	342.267	368.582	279.463	0.183245	1.37072	-3.00448	-0.101391	-2.90309	TBC1D9B	-	-
chr2:99428248-99428307:mpeak_40258|chr2_99411134_99552684_KIAA1211L_NM_-|	11.006	-4.12569	2.35516	-1.75177	0.0798135	0.535503	0	0	0	0	7.31928	21.4262	27.6892	13.8891	6.46634	33.2695	0	13.649	-Inf	0.458235	-Inf	KIAA1211L	chr2:99428258:-	chr2_98811799_-
chr6:42980666-42980780:mpeak_61386|chr6_42980359_42981618_MEA1_NM_-|	278.821	1.33899	0.764522	1.75141	0.0798759	0.535503	5.63848	8.86053	6.94454	2.15545	3.99233	483.781	356.636	640.882	802.904	476.419	1.72521	0.681819	0.732196	-0.607119	1.33931	MEA1	-	-
chr2:142885070-142885235:mpeak_41258|chr2_140990895_142889270_LRP1B_NM_-|	4.82726	3.69452	2.11024	1.75075	0.0799883	0.535503	9.02157	7.75296	4.96039	1.07772	1.99617	1.1277	2.21513	0	2.15545	17.9655	501.806	39.9299	1.64699	-2.00459	3.65159	LRP1B	chr2:142885182:-	chr2_142127454_-;chr2_142127615_-
chr10:5941750-5941800:mpeak_7884|chr10_5931534_5979072_FBXO18_NM_+|	136.908	-2.77793	1.58686	-1.75058	0.0800176	0.535503	1.1277	0	1.98415	1.07772	5.32311	274.03	338.915	205.36	287.752	253.513	0.18398	1.12305	-2.30947	0.300336	-2.60981	FBXO18	chr10:5941807:+	-
chr17:58015986-58016037:mpeak_32157|chr17_57970406_58023911_RPS6KB1_NM_+|	1669.62	-2.73095	1.56053	-1.75002	0.0801153	0.535503	0	1.10757	0	4.3109	7.98467	2980.5	2937.27	3930.61	3226.71	3607.74	0.018716	0.114217	-2.88771	-0.278269	-2.60944	RPS6KB1	chr17:58016038:+	-
chr3:155649846-155649896:mpeak_51242|chr3_155588324_155655379_GMPS_NM_+|	63.0692	-1.69001	0.96597	-1.74955	0.0801959	0.535503	0	5.53783	5.95246	11.855	5.32311	110.514	157.274	80.3583	117.472	136.405	2.06799	6.92044	-1.47744	0.265195	-1.74264	GMPS	-	-
chr9:116311996-116312047:mpeak_72610|chr9_116207008_116359047_RGS3_NM_+|	7.09564	-3.49015	1.99552	-1.74899	0.0802921	0.535503	1.1277	0	0.992077	12.9327	13.3078	5.63848	7.75296	4.96039	12.9327	11.3116	8.42102	93.2472	-4.00892	-0.539926	-3.46899	RGS3	chr9:116312048:+	chr9_113549767_+
chr17:3721795-3721878:mpeak_29519|chr17_3716573_3749545_C17orf85_NM_-|	93.6205	-2.07196	1.18483	-1.74874	0.0803357	0.535503	2.25539	0	5.95246	3.23317	3.32695	165.771	233.696	177.582	162.736	181.651	0.564599	2.39719	-1.88697	0.199076	-2.08604	C17orf85	-	chr17_3818572_-
chr1:113993577-113993629:mpeak_3668|chr1_113933474_114224833_MAGI3_NM_+|	31.8213	1.72225	0.984932	1.7486	0.0803606	0.535503	4.51078	7.75296	2.97623	2.15545	1.33078	53.0017	59.8086	54.5643	40.9535	91.1583	10.8711	3.46186	1.50921	-0.141676	1.65088	MAGI3	-	-
chr15:78878981-78879037:mpeak_25630|chr15_78857861_78885433_CHRNA5_NM_+|	19.296	-2.97331	1.70049	-1.7485	0.0803777	0.535503	0	1.10757	6.94454	0	5.9885	42.8524	27.6892	31.7465	42.0312	34.6002	1.57009	11.9333	-2.96063	-0.0345625	-2.92607	CHRNA5	-	chr15_78586650_+
chr17:17776447-17776499:mpeak_30152|chr17_17751097_17875784_TOM1L2_NM_-|	28.2395	-3.05004	1.74578	-1.74709	0.0806214	0.536047	0	0	0	2.15545	7.98467	28.1924	35.4421	64.485	77.5961	66.5389	0	4.86057	-Inf	-1.12803	-Inf	TOM1L2	-	-
chr5:10391685-10391849:mpeak_56002|chr5_10353750_10433705_MARCH6_NM_+|	649.804	0.883	0.505435	1.74701	0.0806354	0.536047	63.151	34.3346	31.7465	17.2436	24.6194	1279.93	1357.88	1121.05	1440.92	1127.17	3.6957	1.9953	0.990259	0.101022	0.889238	MARCH6	-	-
chr11:47239918-47240061:mpeak_12293|chr11_47236492_47260350_DDB2_NM_+|	127.996	-1.29222	0.740175	-1.74584	0.0808396	0.536047	6.76617	2.21513	10.9129	11.855	5.32311	253.732	303.473	202.384	259.731	223.571	1.61185	4.09676	-1.06014	0.285622	-1.34577	DDB2	-	-
chr6:86268671-86268740:mpeak_62098|chr6_86215723_86303874_SNX14_NM_-|	161.491	-1.16498	0.66764	-1.74492	0.0809981	0.536047	6.76617	7.75296	11.9049	10.7772	23.2886	280.796	351.099	255.956	349.183	317.391	2.29771	4.98313	-1.0778	0.0390524	-1.11685	SNX14	chr6:86268685:-	chr6_85558972_-
chr8:123795889-123795947:mpeak_69984|chr8_123793900_123985481_ZHX2_NM_+|	14.7085	2.16932	1.2433	1.7448	0.0810194	0.536047	10.1493	3.3227	1.98415	3.23317	0	19.1708	31.0119	15.8732	37.7203	24.6194	26.8458	6.67067	1.95354	-0.0552557	2.0088	ZHX2	chr8:123795948:+	chr8_122783707_+;chr8_122783736_+
chr13:37582189-37582252:mpeak_19743|chr13_37574677_37583320_EXOSC8_NM_+|	51.3226	1.28239	0.735106	1.7445	0.0810716	0.536047	25.937	31.0119	28.7702	8.62179	8.65006	66.534	73.0994	80.3583	93.762	96.4814	40.7845	17.0147	0.891676	-0.369564	1.26124	EXOSC8	-	chr13_37008101_+
chr17:59316476-59316527:mpeak_32270|chr17_58755171_59469337_BCAS3_NM_+|	752.335	-2.03816	1.16859	-1.74412	0.0811381	0.536047	1.1277	1.10757	7.93662	0	5.9885	1438.94	1456.45	1603.2	1684.48	1324.12	0.0772007	0.301945	-2.05421	-0.0866112	-1.9676	BCAS3	-	-
chr13:77900604-77900658:mpeak_20410|chr13_77619628_77901177_MYCBP2_NM_-|	25.8653	1.78411	1.02321	1.74365	0.0812205	0.536047	10.1493	5.53783	4.96039	0	1.33078	36.0863	64.2388	33.7306	56.0416	46.5772	15.6363	4.614	1.90314	0.142336	1.76081	MYCBP2	-	-
chr14:45696852-45696958:mpeak_21584|chr14_45673415_45722605_MIS18BP1_NM_-|	16.9777	2.67435	1.5347	1.74258	0.0814063	0.536047	0	13.2908	5.95246	1.07772	1.99617	11.277	16.6135	15.8732	57.1194	46.5772	47.6536	7.54902	1.14317	-1.51505	2.65822	MIS18BP1	-	-
chr1:169773473-169773524:mpeak_5561|chr1_169764549_169821930_C1orf112_NM_+|	11.0713	-3.43789	1.97299	-1.74247	0.0814256	0.536047	0	0	0.992077	0	6.65389	11.277	24.3665	17.8574	26.9431	22.6232	0	11.3402	-Inf	-0.334658	-Inf	C1orf112	chr1:169773527:+	chr1_169804383_+
chr2:111408672-111408728:mpeak_40593|chr2_111395736_111435684_BUB1_NM_-|	12.4901	-3.54267	2.03331	-1.74231	0.0814534	0.536047	0	0	5.95246	7.54407	0	11.277	18.8286	13.8891	38.7981	28.6117	0	16.6011	-Inf	-0.848242	-Inf	BUB1	chr2:111408678:-	chr2_110651101_-
chr2:96073366-96073486:mpeak_40132|chr2_96068447_96078642_FAHD2A_NM_+|	35.5443	-2.89692	1.66269	-1.7423	0.0814551	0.536047	1.1277	0	1.98415	6.46634	2.66156	91.3433	58.701	91.2711	50.653	51.235	0.751575	5.7528	-2.71571	0.220562	-2.93628	FAHD2A	chr2:96073429:+;chr2:96073489:+	chr2_95407677_+;chr2_95407738_+
chr11:33162954-33163102:mpeak_12026|chr11_33106835_33183037_CSTF3_NM_-|	79.4679	-1.25886	0.722544	-1.74227	0.0814619	0.536047	43.9801	50.9481	79.3662	106.695	106.462	48.4909	129.585	44.6435	92.6842	91.8237	53.3076	127.655	-1.03868	0.221156	-1.25984	CSTF3	chr11:33162977:-;chr11:33163048:-	chr11_33141432_-;chr11_33141488_-;chr11_33141542_-
chr11:27368951-27369008:mpeak_11910|chr11_27360582_27384795_CCDC34_NM_-|	135.47	-2.15757	1.23849	-1.74209	0.0814925	0.536047	0	2.21513	0.992077	6.46634	8.65006	212.007	284.645	217.265	333.017	289.444	0.446014	1.9183	-2.27739	-0.172723	-2.10467	CCDC34	chr11:27368959:-	chr11_27347407_-
chr11:35211735-35211793:mpeak_12114|chr11_35160416_35250675_CD44_NM_+|	75.1326	-1.16931	0.671369	-1.74167	0.0815657	0.536047	4.51078	4.43027	13.8891	14.0104	13.3078	122.919	107.434	144.843	170.28	155.701	3.88146	8.75215	-1.61942	-0.446383	-1.17304	CD44	chr11:35211789:+	chr11_35190206_+;chr11_35190241_+
chr7:91978286-91978456:mpeak_65877|chr7_91875547_92027525_ANKIB1_NM_+|	111.765	1.0465	0.600911	1.74153	0.0815904	0.536047	12.4047	6.6454	6.94454	10.7772	6.65389	157.877	141.768	284.726	240.332	249.521	6.35752	3.14696	0.229315	-0.785192	1.01451	ANKIB1	-	-
chr12:104360059-104360116:mpeak_17974|chr12_104359592_104380725_TDG_NM_+|	96.9907	-2.27848	1.30887	-1.7408	0.0817183	0.536047	1.1277	1.10757	0	11.855	5.9885	179.304	182.748	149.804	209.078	228.894	0.617387	3.03576	-2.41192	-0.114107	-2.29781	TDG	chr12:104360110:+	chr12_103966331_+
chr8:81431143-81431196:mpeak_69037|chr8_81397853_81431457_ZBTB10_NM_+|	23.5667	1.4716	0.845568	1.74037	0.0817949	0.536047	6.76617	4.43027	5.95246	6.46634	6.65389	14.66	21.0438	40.6752	71.1298	57.8889	31.3592	11.2395	-0.183506	-1.66382	1.48032	ZBTB10	-	-
chr1:11076893-11077067:mpeak_439|chr1_11072678_11082180_TARDBP_NM_+|	407.213	-1.34292	0.771826	-1.73993	0.0818712	0.536047	5.63848	1.10757	17.8574	6.46634	9.31545	727.364	633.528	826.4	940.853	903.598	0.495708	1.25949	-1.73307	-0.387785	-1.34528	TARDBP	-	-
chr17:79300859-79300918:mpeak_33201|chr17_79287785_79304474_TMEM105_NM_-|	4.17047	-3.86668	2.22242	-1.73985	0.0818848	0.536047	2.25539	0	7.93662	0	5.9885	10.1493	7.75296	4.96039	0	2.66156	12.5984	182.698	-2.04128	1.81687	-3.85815	TMEM105	chr17:79300864:-	chr17_81327068_-
chr12:116662057-116662144:mpeak_18489|chr12_116399203_116714991_MED13L_NM_-|	284.079	-3.37524	1.94023	-1.73961	0.0819278	0.536047	1.1277	0	10.9129	0	0	657.447	827.352	462.308	405.224	476.419	0.0759494	0.811998	-2.68962	0.728749	-3.41837	MED13L	-	-
chr5:5447951-5448006:mpeak_55912|chr5_5422785_5489261_ICE1_NM_+|	11.6727	-3.56366	2.04873	-1.73945	0.0819558	0.536047	0	1.10757	0.992077	3.23317	16.6347	29.3201	6.6454	16.8653	22.6322	19.2963	3.07953	35.4799	-3.65031	-0.124088	-3.52622	ICE1	-	-
chr17:73900616-73900695:mpeak_32936|chr17_73895067_73901181_MRPL38_NM_-|	152.144	1.79543	1.0322	1.73942	0.0819614	0.536047	24.8093	6.6454	10.9129	0	3.32695	271.775	303.473	365.084	222.011	313.398	5.46803	1.58133	1.72831	-0.0615703	1.78988	MRPL38	-	-
chr4:128998933-128999126:mpeak_54898|chr4_128982420_129131010_LARP1B_NM_+|	16.23	2.21516	1.27417	1.73852	0.0821199	0.536264	37.214	42.0875	17.8574	26.9431	17.9655	1.1277	3.3227	0	6.46634	9.31545	1781.9	397.711	0.922327	-1.24129	2.16362	LARP1B	-	chr4_128077850_+
chr19:1223818-1223877:mpeak_34656|chr19_1205797_1227591_STK11_NM_+|	82.9073	1.18092	0.679282	1.73849	0.0821253	0.536264	12.4047	5.53783	2.97623	7.54407	5.9885	112.77	143.984	159.724	191.835	186.309	6.98822	3.0693	0.705107	-0.481908	1.18701	STK11	chr19:1223874:+	chr19_1223874_+
chr13:42439725-42439785:mpeak_19863|chr13_42142441_42535221_VWA8_NM_-|	9.27785	2.11124	1.2154	1.73708	0.0823735	0.537096	5.63848	13.2908	0	3.23317	5.9885	9.02157	11.0757	16.8653	9.69951	17.9655	94.1885	20.7087	1.62248	-0.562829	2.18531	VWA8	chr13:42439721:-	-
chr5:32233479-32233529:mpeak_56183|chr5_32230453_32313114_MTMR12_NM_-|	57.4257	-2.71685	1.56409	-1.73702	0.0823835	0.537096	0	1.10757	2.97623	4.3109	3.99233	118.408	103.004	101.192	108.85	130.416	0.500229	3.31302	-2.76327	-0.0357839	-2.72749	MTMR12	-	-
chr1:150978281-150978334:mpeak_4618|chr1_150969843_150980854_FAM63A_NM_-|	15.9313	1.60804	0.926392	1.73581	0.0825966	0.538058	5.63848	15.5059	3.96831	2.15545	5.9885	25.937	18.8286	19.8415	30.1763	31.2733	47.2336	14.8999	1.38877	-0.275744	1.66451	FAM63A	-	-
chr14:102376675-102376737:mpeak_23449|chr14_102228134_102391477_PPP2R5C_NM_+|	108.94	1.09183	0.629742	1.73377	0.0829595	0.539794	9.02157	12.1832	7.93662	6.46634	3.32695	184.942	204.9	190.479	239.255	230.89	5.43933	2.68381	0.843168	-0.175977	1.01914	PPP2R5C	chr14:102376734:+	chr14_101910395_+
chr4:87594608-87594658:mpeak_54100|chr4_87515467_87735608_PTPN13_NM_+|	5.08864	-4.18611	2.41477	-1.73354	0.0829997	0.539794	0	0	0	0	7.31928	12.4047	8.86053	8.9287	5.38862	7.98467	0	32.819	-Inf	0.516284	-Inf	PTPN13	-	-
chr11:65154649-65154737:mpeak_12888|chr11_65154040_65178712_FRMD8_NM_+|	117.728	1.73949	1.00363	1.7332	0.0830605	0.539794	5.63848	6.6454	0	3.23317	1.33078	179.304	349.991	159.724	233.866	237.544	2.3208	0.723134	2.01337	0.331086	1.68229	FRMD8	chr11:65154705:+;chr11:65154736:+	chr11_65387243_+
chr3:133305504-133305572:mpeak_50673|chr3_133292433_133306002_CDV3_NM_+|	799.266	-0.705192	0.406988	-1.73271	0.083147	0.539929	19.1708	27.6892	28.7702	34.4872	33.2695	1626.14	1840.78	1410.73	1598.26	1373.36	1.35163	2.20262	-0.457611	0.246905	-0.704517	CDV3	-	chr3_133586688_+;chr3_133586718_+
chr6:151816348-151816404:mpeak_63455|chr6_151815174_151939081_CCDC170_NM_+|	103.898	1.46111	0.844061	1.73105	0.0834433	0.540882	11.277	2.21513	2.97623	0	3.32695	213.134	210.438	172.621	213.389	209.598	3.18531	1.05828	1.68293	0.093206	1.58972	CCDC170	chr6:151816406:+	chr6_151495269_+
chr4:39910008-39910090:mpeak_53289|chr4_39827108_39979576_PDS5A_NM_-|	282.084	-1.62911	0.941203	-1.73088	0.0834739	0.540882	4.51078	0	12.897	3.23317	5.32311	498.441	605.839	514.888	643.401	532.311	0.408482	1.26897	-1.66479	-0.029467	-1.63532	PDS5A	-	-
chr9:20699526-20699576:mpeak_70954|chr9_20658307_20995554_FOCAD_NM_+|	70.289	-2.73871	1.58293	-1.73016	0.0836025	0.540882	0	1.10757	1.98415	2.15545	7.31928	120.663	136.231	132.938	131.482	169.009	0.431137	2.64377	-2.78604	-0.169661	-2.61638	FOCAD	-	-
chr20:56886107-56886191:mpeak_45180|chr20_56884770_56934661_RAB22A_NM_+|	639.106	-1.75069	1.0119	-1.7301	0.0836125	0.540882	3.38309	0	2.97623	8.62179	5.9885	1179.57	1321.33	1013.9	1311.59	1543.7	0.135275	0.454527	-1.7931	-0.044626	-1.74847	RAB22A	-	-
chr14:51130382-51130437:mpeak_21695|chr14_51102102_51135071_SAV1_NM_-|	61.818	1.3135	0.759544	1.72933	0.0837499	0.540882	3.38309	9.9681	2.97623	2.15545	3.99233	98.1095	117.402	123.018	126.094	131.082	6.19511	2.39984	1.13419	-0.234004	1.36819	SAV1	-	-
chr6:137359050-137359106:mpeak_63079|chr6_137323492_137366317_IL20RA_NM_-|	34.5569	1.87077	1.08195	1.72907	0.083797	0.540882	5.63848	8.86053	0.992077	0	3.32695	85.7049	58.701	83.3345	65.7412	33.2695	10.0405	2.3686	2.33214	0.248421	2.08372	IL20RA	chr6:137359052:-	-
chr3:52773584-52773697:mpeak_49141|chr3_52745885_52804965_NEK4_NM_-|	26.8912	3.14252	1.81841	1.72817	0.0839582	0.540882	13.5323	0	1.98415	0	0	71.0448	44.3027	81.3503	33.4094	23.2886	11.7318	1.43729	3.35478	0.325775	3.029	NEK4	-	-
chr17:2236668-2236742:mpeak_29441|chr17_2227668_2240678_TSR1_NM_-|	159.521	-2.00353	1.15962	-1.72775	0.0840322	0.540882	1.1277	1.10757	1.98415	7.54407	3.99233	289.818	349.991	298.615	327.628	313.398	0.349364	1.43891	-2.01168	0.0304926	-2.04217	TSR1	chr17:2236685:-	chr17_2333374_-;chr17_2333418_-
chr6:43175349-43175403:mpeak_61413|chr6_43149921_43191987_CUL9_NM_+|	14.9013	1.61568	0.935158	1.72771	0.0840408	0.540882	9.02157	6.6454	1.98415	4.3109	1.33078	20.2985	32.1194	22.8178	25.8654	24.6194	29.8885	10.4032	1.62372	0.10116	1.52256	CUL9	chr6:43175405:+	chr6_43207681_+
chr21:22746256-22746421:mpeak_45577|chr21_22370632_22910166_NCAM2_NM_+|	37.6833	-2.1788	1.26115	-1.72763	0.084055	0.540882	2.25539	0	5.95246	3.23317	7.98467	82.3218	47.6254	83.3345	54.9639	89.1621	1.73562	7.5487	-2.3435	-0.222729	-2.12077	NCAM2	chr21:22746385:+;chr21:22746416:+	chr21_21374062_+;chr21_21374101_+
chr18:44660972-44661080:mpeak_34168|chr18_44635156_44676871_HDHD2_NM_-|	86.212	-1.58396	0.916975	-1.72737	0.0841005	0.540882	4.51078	0	4.96039	4.3109	9.98084	160.133	172.78	158.732	189.679	157.032	1.35494	3.80895	-1.50861	-0.0174418	-1.49116	HDHD2	-	-
chr6:52905931-52905992:mpeak_61619|chr6_52870101_52926600_ICK_NM_-|	63.5546	0.936818	0.542382	1.72723	0.0841264	0.540882	56.3848	79.7448	80.3583	63.5857	67.2043	34.9586	37.6573	97.2236	53.8862	64.5427	187.465	97.9113	-0.0483136	-0.98539	0.937077	ICK	chr6:52905934:-	-
chr13:21141927-21141980:mpeak_19307|chr13_21141207_21265192_IFT88_NM_+|	3.92014	-2.97874	1.7248	-1.72701	0.0841663	0.540882	1.1277	4.43027	9.92077	5.38862	1.33078	5.63848	6.6454	2.97623	1.07772	0.665389	45.246	352.595	-0.99708	1.96507	-2.96215	IFT88	chr13:21141979:+	chr13_20567839_+
chr4:13627157-13627321:mpeak_52915|chr4_13571752_13629328_BOD1L1_NM_-|	17.3774	2.88405	1.67045	1.72652	0.0842546	0.540882	32.7032	47.6254	19.8415	28.0208	35.931	0	1.10757	1.98415	3.23317	3.32695	7252.71	980.697	0.524039	-2.3626	2.88664	BOD1L1	chr4:13627160:-;chr4:13627265:-	chr4_13625536_-
chr11:35214530-35214589:mpeak_12116|chr11_35160416_35250675_CD44_NM_+|	73.2432	-1.95653	1.13333	-1.72636	0.0842822	0.540882	1.1277	2.21513	11.9049	14.0104	1.99617	122.919	107.434	144.843	170.28	155.701	1.45118	5.92822	-2.47676	-0.446383	-2.03037	CD44	chr11:35214583:+	chr11_35193035_+
chr20:25991828-25991879:mpeak_44070|chr20_25990434_26001271_LOC100134868_NR_+|	8.97053	-3.05091	1.76775	-1.72587	0.0843702	0.541024	1.1277	0	0.992077	7.54407	3.99233	18.0431	14.3984	12.897	19.399	11.3116	3.47609	28.73	-2.8888	0.158221	-3.04702	LOC100134868	-	-
chr2:58314652-58314737:mpeak_39179|chr2_58134785_58386483_VRK2_NM_+|	8.89967	-4.05052	2.34758	-1.7254	0.0844551	0.541146	0	0	0	0	6.65389	10.1493	29.9043	17.8574	6.46634	17.9655	0	15.7342	-Inf	0.506602	-Inf	VRK2	-	-
chr1:186376019-186376076:mpeak_6098|chr1_186344889_186388140_C1orf27_NM_+|	88.3513	-1.16804	0.677397	-1.7243	0.0846528	0.541989	10.1493	7.75296	10.9129	26.9431	31.9387	143.217	145.091	192.463	157.348	157.697	6.2094	13.7524	-1.37801	-0.230854	-1.14716	C1orf27	chr1:186376077:+	chr1_186406944_+
chr14:77698135-77698232:mpeak_22821|chr14_77648101_77722868_TMEM63C_NM_+|	4.18551	-3.53656	2.05146	-1.72392	0.0847227	0.542014	0	0	4.96039	2.15545	1.99617	6.76617	4.43027	5.95246	12.9327	2.66156	0	42.2895	-Inf	-0.359465	-Inf	TMEM63C	chr14:77698233:+	chr14_77231889_+
chr3:148763896-148764054:mpeak_51043|chr3_148750159_148804341_HLTF_NM_-|	57.4838	-1.61914	0.93976	-1.72293	0.0849018	0.542737	4.51078	3.3227	12.897	3.23317	9.31545	139.834	121.832	121.033	51.7307	107.128	2.99369	9.09124	-1.11473	0.487823	-1.60255	HLTF	-	-
chr1:224548202-224548252:mpeak_7040|chr1_224544512_224563496_CNIH4_NR_+mpeak_7040|chr1_224544512_224566770_CNIH4_NM_+||	18.0646	1.72258	1.00056	1.72162	0.0851378	0.543354	11.277	5.53783	1.98415	9.69951	1.99617	15.7877	26.5816	35.7148	38.7981	33.2695	39.6862	12.6921	0.882642	-0.762065	1.64471	CNIH4	-	-
chr10:82179650-82179701:mpeak_9668|chr10_82167584_82191741_FAM213A_NM_+|	783.078	-2.72216	1.58161	-1.72114	0.0852258	0.543354	1.1277	0	0	1.07772	5.9885	1899.04	1752.17	1499.03	1249.08	1423.27	0.0308855	0.169398	-2.0626	0.392813	-2.45541	FAM213A	-	-
chr15:74280346-74280401:mpeak_25445|chr15_74276471_74286963_STOML1_NM_-|	13.6973	-3.67437	2.13537	-1.72072	0.0853017	0.543354	0	0	8.9287	1.07772	0	14.66	29.9043	22.8178	40.9535	18.6309	0	12.1434	-Inf	-0.30183	-Inf	STOML1	chr15:74280350:-	chr15_73988010_-
chr5:132404455-132404605:mpeak_58378|chr5_132387661_132439924_HSPA4_NM_+|	160.606	-2.71568	1.57836	-1.72057	0.0853288	0.543354	1.1277	0	3.96831	0	4.65772	324.776	374.357	296.631	347.027	253.513	0.161299	0.96147	-2.35036	0.225147	-2.5755	HSPA4	-	-
chr1:154107227-154107278:mpeak_4842|chr1_153965411_154127592_NUP210L_NM_-|	38.7173	-2.13848	1.2431	-1.72028	0.0853812	0.543354	1.1277	5.53783	22.8178	10.7772	2.66156	93.5987	62.0237	44.6435	98.0729	45.9118	4.28314	19.2212	-1.85849	0.307467	-2.16596	NUP210L	-	-
chr10:98287941-98288089:mpeak_10122|chr10_98282087_98346809_TM9SF3_NM_-|	1082.52	-2.04503	1.18907	-1.71986	0.0854584	0.543354	2.25539	0	2.97623	0	5.32311	2704.21	2658.16	1607.17	1780.4	2064.7	0.0420596	0.152218	-1.29466	0.560978	-1.85564	TM9SF3	chr10:98287957:-	chr10_96528200_-
chr5:141313683-141313742:mpeak_58879|chr5_141303384_141318085_KIAA0141_NM_+|	40.8985	1.47579	0.858097	1.71984	0.0854617	0.543354	11.277	4.43027	1.98415	3.23317	4.65772	59.7679	76.4221	71.4296	64.6634	111.12	11.5333	3.99455	1.25453	-0.275172	1.5297	KIAA0141	chr5:141313738:+	chr5_141934177_+
chr12:125440946-125441103:mpeak_19057|chr12_125432433_125473667_DHX37_NM_-|	52.2051	-1.19554	0.695588	-1.71875	0.0856601	0.544193	6.76617	5.53783	14.8812	21.5545	9.31545	86.8326	93.0356	92.2632	106.695	85.1698	6.84057	16.1023	-1.30972	-0.0746371	-1.23508	DHX37	-	chr12_124956400_-;chr12_124956481_-
chr9:15491752-15491808:mpeak_70898|chr9_15465578_15511003_PSIP1_NM_-|	55.1802	-1.23363	0.718082	-1.71796	0.0858047	0.544691	7.89387	4.43027	14.8812	20.4768	7.98467	106.003	96.3583	90.279	111.006	92.4891	6.09015	14.7537	-1.22934	0.0471934	-1.27653	PSIP1	chr9:15491752:-	-
chr14:51219394-51219459:mpeak_21705|chr14_51190390_51297839_NIN_NM_-|	12.7467	-3.71802	2.16499	-1.71734	0.0859173	0.544984	0	0	0	0	6.65389	15.7877	35.4421	14.8812	33.4094	21.2925	0	9.56252	-Inf	0.143212	-Inf	NIN	-	chr14_50752679_-
chr1:211564991-211565048:mpeak_6696|chr1_211556096_211605660_LINC00467_NR_+|	28.4498	-1.31625	0.766718	-1.71673	0.0860279	0.545264	20.2985	37.6573	17.8574	19.399	16.6347	54.1294	70.8842	19.8415	20.4768	7.31928	46.3596	113.127	0.689867	1.97688	-1.28701	LINC00467	-	chr1_211391687_+
chr9:117106287-117106342:mpeak_72634|chr9_117099586_117156685_AKNA_NM_-|	14.4673	-3.64712	2.12571	-1.71571	0.0862143	0.545853	0	0	0	0	8.65006	23.6816	24.3665	25.794	35.5649	26.6156	0	9.83247	-Inf	-0.287644	-Inf	AKNA	chr9:117106286:-	chr9_114344007_-
chr16:81015405-81015483:mpeak_28797|chr16_81010076_81040502_CMC2_NM_-|	268.798	1.63145	0.951419	1.71476	0.0863897	0.545853	14.66	2.21513	6.94454	0	1.99617	452.206	561.536	502.983	539.94	605.504	1.66464	0.542378	1.5014	-0.116437	1.61784	CMC2	-	-
chr14:91850804-91850893:mpeak_23085|chr14_91739997_91884188_CCDC88C_NM_-|	41.5832	1.20999	0.705722	1.71454	0.0864288	0.545853	13.5323	9.9681	2.97623	4.3109	7.98467	78.9387	66.454	91.2711	76.5184	63.8774	16.1634	6.59214	1.20678	-0.0871346	1.29392	CCDC88C	chr14:91850773:-;chr14:91850807:-;chr14:91850838:-	-
chr16:3336829-3336886:mpeak_26555|chr16_3333486_3339392_ZNF263_NM_+|	27.6604	-1.73472	1.0122	-1.7138	0.0865651	0.545853	9.02157	6.6454	4.96039	31.254	31.2733	51.874	32.1194	31.7465	43.109	34.6002	18.6526	61.6575	-1.52194	0.202964	-1.7249	ZNF263	chr16:3336885:+	chr16_3286869_+
chr12:13046350-13046410:mpeak_15303|chr12_13043955_13065380_GPRC5A_NM_+|	487.49	-2.84385	1.65942	-1.71376	0.0865731	0.545853	0	0	0.992077	2.15545	7.98467	531.145	414.23	1488.12	1588.56	841.717	0	0.284101	-Inf	-1.46634	-Inf	GPRC5A	chr12:13046405:+	chr12_12893470_+
chr2:99992804-99993099:mpeak_40309|chr2_99953833_100015769_EIF5B_NM_+|	208.296	1.08957	0.635833	1.71361	0.0866004	0.545853	89.088	35.4421	33.7306	21.5545	33.9348	313.499	424.198	290.679	397.68	443.149	16.8809	7.88505	1.06602	-0.0321833	1.0982	EIF5B	chr2:99993099:+	chr2_99376406_+;chr2_99376448_+;chr2_99376493_+;chr2_99376620_+
chr1:244580998-244581061:mpeak_7594|chr1_244572940_244615436_ADSS_NM_-|	62.2434	0.850995	0.496687	1.71334	0.0866497	0.545853	49.6186	43.1951	35.7148	28.0208	25.9502	76.6833	84.175	71.4296	113.161	94.4853	57.699	32.1367	0.634421	-0.209904	0.844325	ADSS	-	-
chr2:159956415-159956465:mpeak_41474|chr2_159825145_160086088_TANC1_NM_+|	8.8383	-2.16955	1.26628	-1.71332	0.0866529	0.545853	0	3.3227	6.94454	3.23317	3.32695	22.5539	15.5059	12.897	8.62179	11.977	8.7302	40.3175	-1.43807	0.769252	-2.20732	TANC1	chr2:159956469:+	chr2_159099953_+
chr12:69642412-69642470:mpeak_17189|chr12_69633316_69663291_CPSF6_NM_+|	143.942	-1.69596	0.99033	-1.71252	0.086801	0.546019	2.25539	1.10757	4.96039	6.46634	2.66156	298.839	341.13	271.829	258.654	251.517	0.525487	1.80157	-1.48173	0.295798	-1.77753	CPSF6	chr12:69642471:+	chr12_69248690_+
chr5:65339959-65340109:mpeak_56834|chr5_65222381_65374250_ERBB2IP_NM_+|	65.8138	0.957183	0.558952	1.71246	0.0868122	0.546019	21.4262	33.227	21.8257	26.9431	24.6194	77.811	69.7767	108.136	106.695	167.678	37.031	19.186	0.159721	-0.788959	0.94868	ERBB2IP	-	chr5_66044193_+
chr4:125597560-125597610:mpeak_54851|chr4_125588669_125633887_ANKRD50_NM_-|	39.5631	-2.88485	1.68501	-1.71207	0.086884	0.546052	0	0	5.95246	4.3109	0	40.597	54.2708	93.2553	89.4511	107.793	0	3.53301	-Inf	-1.02958	-Inf	ANKRD50	chr4:125597558:-	chr4_124676405_-
chr17:58003784-58003911:mpeak_32155|chr17_57970406_58023911_RPS6KB1_NM_+|	1669.56	-2.703	1.57915	-1.71168	0.0869552	0.546081	1.1277	0	2.97623	0	8.65006	2980.5	2937.27	3930.61	3226.71	3607.74	0.0190561	0.108	-2.78098	-0.278269	-2.50271	RPS6KB1	-	-
chr17:28804850-28804914:mpeak_30608|chr17_28804425_28849271_GOSR1_NM_+|	104.612	-2.15775	1.26095	-1.71121	0.0870415	0.546205	0	2.21513	0	2.15545	5.9885	219.901	318.979	152.78	172.436	171.67	0.411063	1.639	-1.29337	0.702011	-1.99538	GOSR1	-	-
chr11:46811479-46811649:mpeak_12269|chr11_46765815_46867859_CKAP5_NM_-|	53.2396	-1.53348	0.896434	-1.71064	0.0871473	0.546286	1.1277	4.43027	3.96831	11.855	7.98467	83.4495	120.725	88.2949	112.083	98.4776	2.72217	7.96637	-1.51385	0.0353138	-1.54917	CKAP5	chr11:46811482:-	chr11_46789932_-
chr1:202882220-202882316:mpeak_6395|chr1_202861787_202897772_KLHL12_NM_-|	67.525	-1.83752	1.0745	-1.71011	0.0872453	0.546286	3.38309	0	2.97623	5.38862	10.6462	126.302	118.51	110.121	128.249	169.674	1.38191	4.65908	-1.90547	-0.152091	-1.75337	KLHL12	-	-
chr12:69653201-69653251:mpeak_17191|chr12_69633316_69663291_CPSF6_NM_+|	143.892	-1.68598	0.985917	-1.71006	0.0872541	0.546286	2.25539	1.10757	5.95246	4.3109	3.32695	298.839	341.13	271.829	258.654	251.517	0.525487	1.73789	-1.42981	0.295798	-1.72561	CPSF6	-	-
chr7:44871549-44871635:mpeak_65011|chr7_44869762_44887725_H2AFV_NM_-|	60.6871	1.0123	0.592406	1.70879	0.0874899	0.547346	42.8524	31.0119	23.8099	45.2644	47.2426	43.9801	55.3783	127.978	86.2179	103.135	74.3412	36.6547	-0.070149	-1.09031	1.02016	H2AFV	chr7:44871577:-	chr7_44831978_-;chr7_44832017_-
chr7:105146396-105146600:mpeak_66351|chr7_105098373_105162685_PUS7_NM_-|	17.1753	-1.72062	1.00748	-1.70784	0.0876658	0.548028	2.25539	6.6454	3.96831	5.38862	15.3039	37.214	36.5497	22.8178	18.3213	23.2886	12.0666	38.2768	-0.885256	0.780191	-1.66545	PUS7	chr7:105146535:-	chr7_105506008_-;chr7_105506089_-
chr1:38399625-38399675:mpeak_1663|chr1_38328102_38412729_INPP5B_NM_-|	17.7238	-2.26259	1.32563	-1.7068	0.0878591	0.548089	2.25539	1.10757	12.897	6.46634	1.33078	32.7032	35.4421	29.7623	36.6426	18.6309	4.93498	24.3358	-2.03646	0.265506	-2.30196	INPP5B	-	-
chr1:155659813-155659990:mpeak_5018|chr1_155658881_155707947_DAP3_NM_+|	441.009	-2.31291	1.35554	-1.70627	0.0879587	0.548089	4.51078	0	21.8257	5.38862	1.33078	802.919	1138.58	641.874	780.272	1013.39	0.232335	1.17203	-2.07683	0.257894	-2.33473	DAP3	chr1:155659893:+	chr1_155690099_+
chr5:159831461-159831579:mpeak_59296|chr5_159830471_159846168_SLU7_NM_-|	78.3887	0.782008	0.458409	1.70592	0.0880234	0.548089	75.5556	65.3464	43.6514	38.7981	63.212	78.9387	98.5734	102.184	113.161	104.466	79.376	45.5461	0.537036	-0.26434	0.801376	SLU7	-	chr5_160404457_-
chr14:45590683-45590744:mpeak_21568|chr14_45585455_45603732_FKBP3_NM_-|	546.142	-0.560535	0.328681	-1.70541	0.0881187	0.548089	58.6402	62.0237	95.2394	72.2075	93.8199	1014.93	1037.79	927.592	1051.86	1047.32	5.87826	8.63186	-0.529567	0.0247158	-0.554283	FKBP3	-	-
chr7:102947131-102947187:mpeak_66287|chr7_102937872_102952653_PMPCB_NM_+|	41.253	1.43709	0.842692	1.70536	0.0881273	0.548089	7.89387	9.9681	2.97623	2.15545	5.9885	83.4495	54.2708	55.5563	85.1402	105.131	12.9697	4.52356	1.26867	-0.250946	1.51962	PMPCB	chr7:102947182:+	chr7_103306738_+
chr2:61249490-61249613:mpeak_39212|chr2_61244811_61275606_PEX13_NM_+|	54.7424	1.57425	0.923337	1.70495	0.0882029	0.548089	5.63848	7.75296	5.95246	2.15545	0	93.5987	107.434	101.192	87.2956	136.405	6.66133	2.49557	1.30887	-0.107569	1.41644	PEX13	chr2:61249607:+	chr2_61022478_+
chr1:33256755-33256807:mpeak_1414|chr1_33241692_33283633_YARS_NM_-|	128.09	1.32776	0.778861	1.70475	0.0882409	0.548089	5.63848	5.53783	2.97623	1.07772	2.66156	237.944	254.74	256.948	270.509	242.867	2.26845	0.871778	1.31984	-0.0598397	1.37968	YARS	-	-
chr6:135715793-135715850:mpeak_63012|chr6_135606785_135818903_AHI1_NM_-|	14.6891	-3.22426	1.89181	-1.70433	0.0883196	0.548089	0	3.3227	1.98415	15.0881	0	40.597	42.0875	7.93662	17.2436	18.6309	4.01852	38.968	-1.77627	1.50128	-3.27755	AHI1	chr6:135715795:-	chr6_135394676_-
chr2:201943591-201943662:mpeak_42444|chr2_201936461_201950181_NDUFB3_NM_+|	190.063	1.94296	1.14013	1.70416	0.0883516	0.548089	29.3201	2.21513	5.95246	2.15545	3.99233	374.395	373.25	237.107	278.053	594.192	4.21794	1.09075	1.96689	0.0156706	1.95122	NDUFB3	-	chr2_201078981_+
chr17:57969879-57969943:mpeak_32148|chr17_57937785_57970306_TUBD1_NM_-|	119.591	1.00728	0.591217	1.70375	0.0884285	0.548089	13.5323	9.9681	8.9287	12.9327	5.9885	187.197	160.597	232.146	293.141	271.479	6.75699	3.49537	0.339979	-0.610958	0.950937	TUBD1	chr17:57969882:-	chr17_59892530_-
chr12:39735843-39735942:mpeak_15838|chr12_39688319_39837192_KIF21A_NM_-|	29.5169	-1.28436	0.754022	-1.70335	0.0885028	0.548089	19.1708	16.6135	11.9049	19.399	34.6002	55.2571	54.2708	19.8415	30.1763	33.9348	32.6714	78.5016	-0.29608	0.968612	-1.26469	KIF21A	chr12:39735835:-	-
chr4:106390545-106390595:mpeak_54468|chr4_106290910_106395227_PPA2_NM_-|	301.616	-2.77783	1.63137	-1.70275	0.088614	0.548089	1.1277	0	7.93662	0	2.66156	505.208	759.791	447.427	663.878	628.127	0.089146	0.609289	-2.6474	0.125481	-2.77289	PPA2	chr4:106390541:-	chr4_105469386_-
chr12:98994720-98994770:mpeak_17807|chr12_98987402_98995145_SLC25A3_NM_+|	749.171	-2.67312	1.56998	-1.70265	0.0886339	0.548089	0	1.10757	4.96039	0	4.65772	1422.02	1636.98	1209.34	1708.19	1504.44	0.0362067	0.217507	-2.5334	0.0533338	-2.58673	SLC25A3	chr12:98994774:+	chr12_98600992_+
chr1:151957538-151957591:mpeak_4757|chr1_151955800_151966714_S100A10_NM_-|	1624.26	-1.94638	1.14357	-1.70202	0.0887518	0.548089	0	2.21513	3.96831	9.69951	8.65006	2203.52	2279.37	3135.96	4421.9	4177.31	0.0494131	0.190179	-2.74777	-0.803376	-1.9444	S100A10	chr1:151957540:-	chr1_151985013_-;chr1_151985063_-
chr19:55997545-55997598:mpeak_37555|chr19_55996556_55997774_NAT14_NM_+|	41.1489	1.82529	1.07296	1.70117	0.0889106	0.548089	4.51078	7.75296	5.95246	0	0	60.8956	91.928	69.4454	76.5184	94.4853	8.02477	2.47556	1.6278	-0.0689017	1.69671	NAT14	chr19:55997599:+	chr19_55486231_+
chr14:100350064-100350114:mpeak_23383|chr14_100259744_100406323_EML1_NM_+|	21.8054	-2.20611	1.29685	-1.70113	0.0889191	0.548089	2.25539	0	1.98415	2.15545	6.65389	45.1078	50.9481	31.7465	45.2644	31.9387	2.348	9.90687	-1.67375	0.403248	-2.077	EML1	chr14:100350115:+	chr14_99883777_+
chr15:49048558-49048753:mpeak_24443|chr15_49031485_49103343_CEP152_NM_-|	14.0013	-1.89654	1.11522	-1.70059	0.0890201	0.548089	2.25539	1.10757	5.95246	8.62179	5.32311	19.1708	26.5816	20.8336	21.5545	28.6117	7.35034	28.0245	-1.97981	-0.0490051	-1.93081	CEP152	-	-
chr6:157372996-157373046:mpeak_63565|chr6_157099063_157527300_ARID1B_NM_+|	42.6088	-2.80127	1.64729	-1.70053	0.0890314	0.548089	0	1.10757	0.992077	1.07772	5.9885	108.259	84.175	77.382	59.2748	87.8314	0.575557	3.58963	-2.27812	0.362685	-2.64081	ARID1B	-	chr6_157051912_+
chr2:159948258-159948314:mpeak_41473|chr2_159825145_160086088_TANC1_NM_+|	9.07581	-2.35116	1.38284	-1.70024	0.0890851	0.548089	3.38309	0	6.94454	7.54407	1.33078	22.5539	15.5059	12.897	8.62179	11.977	8.88886	47.228	-1.64032	0.769252	-2.40957	TANC1	chr2:159948315:+	chr2_159091803_+
chr17:3746370-3746433:mpeak_29523|chr17_3716573_3749545_C17orf85_NM_-|	96.7849	1.0422	0.61298	1.70022	0.0890901	0.548089	13.5323	14.3984	6.94454	7.54407	3.99233	165.771	233.696	177.582	162.736	181.651	6.99198	3.54062	1.18078	0.199076	0.9817	C17orf85	-	-
chr2:17953891-17954035:mpeak_38110|chr2_17935176_17961887_GEN1_NM_+|	9.36775	-2.11598	1.24466	-1.70005	0.0891222	0.548089	1.1277	3.3227	4.96039	3.23317	9.98084	18.0431	17.7211	17.8574	10.7772	6.65389	12.4437	51.5023	-1.44494	0.604279	-2.04922	GEN1	-	-
chr14:92265368-92265416:mpeak_23111|chr14_92249554_92333880_TC2N_NM_-|	234.182	-2.69152	1.58331	-1.69993	0.0891446	0.548089	1.1277	0	0.992077	7.54407	2.66156	416.12	526.094	375.997	516.23	495.049	0.119686	0.807171	-2.72679	0.0268333	-2.75362	TC2N	-	-
chr2:179307938-179308010:mpeak_41978|chr2_179296981_179315958_PRKRA_NM_-|	118.561	-2.18566	1.28641	-1.69904	0.0893116	0.548705	0	2.21513	0	9.69951	7.31928	190.581	242.557	200.4	295.296	237.544	0.511415	2.32104	-2.3567	-0.174497	-2.1822	PRKRA	chr2:179307948:-	chr2_178443222_-
chr3:69128383-69128449:mpeak_49501|chr3_69104676_69129524_UBA3_NM_-|	23.1658	-1.62204	0.955161	-1.69819	0.0894718	0.548829	3.38309	17.7211	9.92077	29.0985	21.2925	40.597	37.6573	24.8019	17.2436	29.9425	26.9687	83.7803	-0.92995	0.705376	-1.63533	UBA3	chr3:69128396:-	chr3_69079246_-
chr8:100508095-100508188:mpeak_69498|chr8_100025493_100887645_VPS13B_NM_+|	45.7308	-1.27181	0.749015	-1.69798	0.0895116	0.548829	108.259	84.175	52.5801	87.2956	79.8467	18.0431	12.1832	2.97623	8.62179	3.32695	636.642	1472.18	0.393643	1.60304	-1.2094	VPS13B	chr8:100508148:+;chr8:100508184:+	-
chr7:138943318-138943377:mpeak_67013|chr7_138916230_138982532_UBN2_NM_+|	23.318	1.28268	0.755579	1.69761	0.0895807	0.548829	11.277	13.2908	6.94454	2.15545	8.65006	38.3417	28.7967	35.7148	47.4198	40.5887	36.5927	14.3466	1.05391	-0.296946	1.35085	UBN2	-	chr7_139258604_+
chr19:19907643-19907693:mpeak_35849|chr19_19906469_19932560_ZNF506_NM_-|	6.95267	-2.58617	1.52364	-1.69736	0.0896282	0.548829	1.1277	1.10757	1.98415	3.23317	3.99233	14.66	19.9362	6.94454	3.23317	13.3078	6.461	39.2143	-1.45774	1.14381	-2.60155	ZNF506	chr19:19907642:-	chr19_19796834_-
chr17:29096686-29096748:mpeak_30630|chr17_29036625_29096889_SUZ12P1_NR_+|	10.3548	-2.6792	1.57864	-1.69716	0.0896662	0.548829	1.1277	1.10757	5.95246	11.855	4.65772	3.38309	27.6892	14.8812	12.9327	19.9617	7.19376	47.0223	-2.74421	-0.0356826	-2.70853	SUZ12P1	chr17:29096747:+	chr17_30769726_+
chr11:95556321-95556383:mpeak_13944|chr11_95523624_95564189_CEP57_NM_+|	26.5502	-1.40428	0.828407	-1.69516	0.090046	0.550743	3.38309	15.5059	12.897	22.6322	9.98084	57.5125	48.7329	29.7623	34.4872	30.6079	17.7787	47.9773	-0.683675	0.748531	-1.43221	CEP57	chr11:95556374:+	chr11_95823208_+
chr3:185641560-185641665:mpeak_51990|chr3_185635513_185655924_TRA2B_NM_-|	261.129	1.18752	0.701536	1.69274	0.0905046	0.553136	25.937	9.9681	11.9049	10.7772	5.32311	426.269	508.373	383.934	609.992	618.812	3.84159	1.73651	0.943452	-0.202063	1.14552	TRA2B	-	-
chr13:21215871-21216008:mpeak_19311|chr13_21141207_21265192_IFT88_NM_+|	6.29701	-2.37014	1.40163	-1.69098	0.0908398	0.554771	7.89387	7.75296	11.9049	15.0881	3.32695	5.63848	6.6454	2.97623	1.07772	0.665389	127.377	642.462	-0.369437	1.96507	-2.33451	IFT88	chr13:21215922:+	chr13_20641782_+
chr9:68430107-68430255:mpeak_71419|chr9_68427894_68454375_LOC642236_NR_-|	11.3825	-2.58977	1.53194	-1.69052	0.0909289	0.554903	2.25539	0	4.96039	6.46634	1.99617	32.7032	17.7211	12.897	7.54407	27.281	4.47283	28.1273	-1.98828	0.664425	-2.65271	LOC642236	-	-
chr15:44109528-44109651:mpeak_24313|chr15_44097474_44116951_MFAP1_NM_-|	14.323	1.66862	0.987387	1.68993	0.0910412	0.555047	9.02157	3.3227	8.9287	4.3109	6.65389	11.277	6.6454	34.7227	37.7203	20.6271	68.8764	21.3747	-0.103493	-1.7916	1.6881	MFAP1	-	-
chr12:121968231-121968285:mpeak_18760|chr12_121868272_122018920_KDM2B_NM_-|	75.3947	-2.13678	1.2646	-1.68969	0.0910878	0.555047	0	2.21513	0	5.38862	3.99233	160.133	217.083	93.2553	131.482	140.397	0.587232	2.56918	-1.49738	0.631924	-2.1293	KDM2B	chr12:121968236:-	chr12_121530326_-
chr5:176690156-176690211:mpeak_59603|chr5_176560079_176720832_NSD1_NM_+|	40.5764	-1.98162	1.17308	-1.68924	0.0911726	0.555152	3.38309	0	7.93662	3.23317	13.3078	74.4279	55.3783	97.2236	51.7307	99.143	2.60626	9.86612	-2.27009	-0.349584	-1.9205	NSD1	chr5:176690209:+	chr5_177263210_+
chr2:61729379-61729447:mpeak_39267|chr2_61706101_61765418_XPO1_NM_-|	94.3911	-1.32434	0.784389	-1.68838	0.0913387	0.555751	11.277	7.75296	30.7544	16.1659	60.5504	133.068	115.187	213.297	164.892	190.967	7.66547	18.8825	-1.91264	-0.612037	-1.3006	XPO1	chr2:61729384:-	-
chr20:47438201-47438277:mpeak_44823|chr20_47242465_47444420_PREX1_NM_-|	735.325	-0.777455	0.460642	-1.68776	0.0914567	0.556057	43.9801	66.454	34.7227	58.1971	44.5811	2082.85	2040.14	899.814	884.811	1197.7	2.6785	4.61052	0.268708	1.05222	-0.783508	PREX1	chr20:47438198:-;chr20:47438225:-	chr20_48821678_-
chr1:151287905-151287962:mpeak_4675|chr1_151265509_151300191_PI4KB_NM_-|	142.474	-2.71281	1.60943	-1.68557	0.0918791	0.557852	0	1.10757	0	6.46634	4.65772	267.264	290.182	220.241	266.198	368.626	0.198686	1.30096	-2.74326	-0.0322381	-2.71102	PI4KB	chr1:151287902:-	chr1_151315429_-
chr6:29912333-29912397:mpeak_60659|chr6_29910246_29913227_HLA-A_NM_+|	114.575	-1.2699	0.753416	-1.68552	0.0918878	0.557852	2.25539	7.75296	20.8336	7.54407	11.3116	174.793	241.449	211.312	234.944	233.552	2.40445	5.83831	-1.40258	-0.122741	-1.27984	HLA-A	-	chr6_29944606_+
chr6:101084599-101084652:mpeak_62405|chr6_100957409_101329248_ASCC3_NM_-|	13.9605	-3.62891	2.15545	-1.6836	0.0922598	0.559696	0	0	0	0	7.31928	23.6816	27.6892	13.8891	29.0985	37.9272	0	9.04566	-Inf	-0.0704936	-Inf	ASCC3	chr6:101084598:-	-
chr1:117912368-117912418:mpeak_3952|chr1_117910084_118065446_MAN1A2_NM_+|	122.509	-2.94833	1.75291	-1.68197	0.092575	0.561146	0	0	0	0	6.65389	213.134	137.338	281.75	252.187	334.025	0	0.76661	-Inf	-0.723368	-Inf	MAN1A2	chr1:117912424:+	chr1_117369816_+
chr5:145887460-145887526:mpeak_58981|chr5_145826872_145890003_TCERG1_NM_+|	27.0344	1.13028	0.672126	1.68166	0.0926356	0.561146	12.4047	22.1513	8.9287	5.38862	5.32311	45.1078	52.0556	40.6752	37.7203	40.5887	35.5648	16.5067	1.40007	0.292678	1.10739	TCERG1	chr5:145887519:+	chr5_146507956_+
chr6:149893691-149893748:mpeak_63342|chr6_149887527_149911862_GINM1_NM_+|	16.5444	1.63075	0.970798	1.67981	0.092995	0.562311	15.7877	5.53783	5.95246	1.07772	6.65389	18.0431	24.3665	37.6989	23.7099	26.6156	50.2848	15.5458	1.22505	-0.468551	1.6936	GINM1	-	-
chr4:39769347-39769404:mpeak_53260|chr4_39699663_39779979_UBE2K_NM_+|	583.318	-2.62766	1.56461	-1.67944	0.0930671	0.562311	1.1277	0	0	5.38862	7.98467	957.414	931.463	1191.48	1245.85	1492.47	0.0597019	0.340304	-2.98294	-0.471965	-2.51098	UBE2K	chr4:39769399:+	chr4_39767777_+
chr7:26250149-26250202:mpeak_64547|chr7_26240830_26251701_CBX3_NM_+|	906.814	-2.63482	1.56894	-1.67936	0.0930812	0.562311	1.1277	0	0	3.23317	7.31928	1646.44	1710.08	1691.49	2136.05	1872.4	0.0335972	0.185132	-2.64117	-0.17902	-2.46215	CBX3	chr7:26250203:+	chr7_26210582_+
chr6:24178759-24178863:mpeak_60382|chr6_24175062_24383520_DCDC2_NM_-|	30.311	1.5882	0.945778	1.67926	0.0931019	0.562311	11.277	7.75296	0	6.46634	1.99617	43.9801	77.5296	41.6673	53.8862	58.5542	15.6612	5.4913	1.75407	0.242096	1.51198	DCDC2	-	-
chr16:69481049-69481186:mpeak_28409|chr16_69458497_69496332_CYB5B_NM_+|	448.224	-2.643	1.57505	-1.67804	0.0933384	0.563325	0	1.10757	8.9287	0	3.32695	832.239	789.695	810.527	967.796	1068.61	0.0682868	0.430485	-2.88302	-0.226733	-2.65629	CYB5B	-	-
chr1:147095511-147095598:mpeak_4310|chr1_147013270_147095642_BCL9_NM_+|	23.1205	-2.42801	1.44825	-1.67651	0.0936376	0.564608	2.25539	0	0	1.07772	6.65389	54.1294	74.2069	28.7702	30.1763	33.9348	1.75741	8.32418	-1.19243	1.05143	-2.24386	BCL9	chr1:147095600:+	-
chr1:22074619-22074673:mpeak_831|chr1_22005932_22109688_USP48_NM_-|	39.3154	1.58568	0.945966	1.67625	0.0936886	0.564608	15.7877	4.43027	0	5.38862	3.32695	74.4279	84.175	88.2949	61.4303	55.8927	12.7476	4.23872	1.79894	0.210417	1.58852	USP48	-	-
chr19:1586527-1586577:mpeak_34708|chr19_1578157_1592760_MBD3_NM_-|	187.855	1.24463	0.742684	1.67586	0.0937663	0.564662	6.76617	5.53783	7.93662	1.07772	3.32695	277.413	273.569	509.928	425.701	367.295	2.2331	0.9472	0.580598	-0.656713	1.23731	MBD3	-	-
chr4:170601828-170601880:mpeak_55498|chr4_170541671_170641057_CLCN3_NM_+|	140.817	-2.63813	1.5747	-1.67532	0.0938724	0.564886	0	1.10757	1.98415	1.07772	5.9885	301.095	266.923	234.13	301.763	294.102	0.194988	1.09041	-2.44562	0.0377972	-2.48342	CLCN3	-	chr4_169680729_+
chr17:42401190-42401240:mpeak_31364|chr17_42397484_42402217_SLC25A39_NM_-|	1039.52	-2.58876	1.54771	-1.67264	0.0943982	0.567239	1.1277	0	4.96039	2.15545	3.32695	1965.57	2094.41	2352.22	2174.85	1796.55	0.0277759	0.165139	-2.62609	-0.0543134	-2.57178	SLC25A39	-	-
chr1:192990220-192990288:mpeak_6139|chr1_192989586_193029237_UCHL5_NR_-mpeak_6139|chr1_192985525_193028523_UCHL5_NM_-||	151.191	0.898931	0.537438	1.67262	0.0944016	0.567239	25.937	40.98	20.8336	24.7876	35.2656	199.602	215.975	242.067	335.172	371.287	16.1022	8.52764	0.311428	-0.605607	0.917036	UCHL5	-	chr1_193021095_-
chr15:64380955-64381055:mpeak_25059|chr15_64365227_64386207_FAM96A_NR_-mpeak_25059|chr15_64367736_64386207_FAM96A_NM_-||	53.4428	1.2508	0.748005	1.67219	0.0944874	0.567339	100.365	131.8	108.136	75.4407	73.1928	9.02157	3.3227	12.897	12.9327	7.31928	1880.75	774.594	0.439639	-0.840161	1.2798	FAM96A	-	chr15_64088795_-
chr9:115385387-115385443:mpeak_72515|chr9_115249247_115421542_KIAA1958_NM_+|	24.325	2.14733	1.28496	1.67112	0.0946975	0.568185	4.51078	11.0757	1.98415	2.15545	0	43.9801	65.3464	60.5167	15.0881	38.5926	14.2568	3.62495	2.49769	0.522076	1.97561	KIAA1958	chr9:115385441:+	chr9_112623160_+
chr20:3889216-3889293:mpeak_43664|chr20_3869485_3903890_PANK2_NM_+|	53.8442	-1.54944	0.927768	-1.67007	0.0949056	0.568695	2.25539	5.53783	31.7465	6.46634	16.6347	73.3002	66.454	106.152	126.094	103.801	5.57638	16.3214	-2.23017	-0.680807	-1.54937	PANK2	chr20:3889272:+;chr20:3889299:+	chr20_3908633_+
chr3:57898280-57898437:mpeak_49274|chr3_57742982_57913022_SLMAP_NM_+|	30.2715	-1.28903	0.771876	-1.66999	0.0949211	0.568695	11.277	12.1832	35.7148	28.0208	11.3116	38.3417	50.9481	39.6831	36.6426	38.5926	26.2742	65.3049	-1.09262	0.22092	-1.31354	SLMAP	-	chr3_57912604_+;chr3_57912674_+
chr3:48967319-48967440:mpeak_48920|chr3_48956280_49020631_ARIH2_NM_+|	278.47	-2.99977	1.7968	-1.6695	0.0950175	0.568858	1.1277	0	0.992077	0	11.3116	474.76	625.775	476.197	659.567	534.973	0.102468	0.736423	-2.86268	-0.0173173	-2.84536	ARIH2	-	chr3_48929938_+
chr11:18608714-18608766:mpeak_11839|chr11_18554034_18610293_UEVLD_NM_-|	6.10032	-3.31267	1.98563	-1.66832	0.0952522	0.569847	0	1.10757	0.992077	7.54407	3.99233	18.0431	4.43027	4.96039	8.62179	11.3116	4.92834	50.3277	-2.91478	0.437395	-3.35218	UEVLD	-	-
chr20:3898352-3898460:mpeak_43665|chr20_3869485_3903890_PANK2_NM_+|	52.825	0.991745	0.594825	1.66729	0.0954569	0.570629	10.1493	13.2908	10.9129	10.7772	7.31928	73.3002	66.454	106.152	126.094	103.801	16.7723	8.63254	0.27742	-0.680807	0.958227	PANK2	chr20:3898460:+	chr20_3917811_+
chr1:120537032-120537104:mpeak_4040|chr1_120459317_120612317_NOTCH2_NM_-|	83.511	-1.383	0.829695	-1.66688	0.095539	0.570629	21.4262	9.9681	32.7386	5.38862	21.2925	201.858	228.159	104.168	96.9951	113.116	7.30073	18.9066	-0.335474	1.03731	-1.37278	NOTCH2	-	-
chr18:33610990-33611065:mpeak_34055|chr18_33573263_33647557_RPRD1A_NM_-|	108.113	1.20496	0.723001	1.66661	0.0955915	0.570629	39.4693	12.1832	20.8336	12.9327	11.977	128.557	196.039	219.249	257.576	182.317	15.9129	6.93983	0.760242	-0.436979	1.19722	RPRD1A	-	-
chr19:55652244-55652334:mpeak_37522|chr19_55644328_55660722_TNNT1_NM_-|	142.351	0.8326	0.499786	1.66591	0.095731	0.571047	30.4478	57.5934	25.794	20.4768	33.2695	243.582	233.696	285.718	241.41	251.517	18.4465	10.2152	0.731457	-0.121172	0.852629	TNNT1	-	-
chr6:79786900-79786964:mpeak_61959|chr6_79651047_79788011_PHIP_NM_-|	50.351	-1.58048	0.949591	-1.66438	0.0960357	0.572448	4.51078	1.10757	2.97623	9.69951	13.3078	95.8541	85.2826	107.144	107.772	75.8544	3.10172	8.93608	-1.62442	-0.0978422	-1.52657	PHIP	chr6:79786909:-	chr6_79077193_-
chr4:183272313-183272497:mpeak_55616|chr4_183245136_183720748_TENM3_NM_+|	6.64349	-3.6791	2.211	-1.664	0.0961134	0.572495	0	1.10757	8.9287	5.38862	0	15.7877	9.9681	15.8732	5.38862	3.99233	4.30025	56.6928	-3.10733	0.613339	-3.72067	TENM3	chr4:183272499:+	chr4_182351344_+
chr15:63357115-63357320:mpeak_24992|chr15_63334837_63363288_TPM1_NM_+|	271.002	-2.76515	1.6634	-1.66235	0.0964417	0.574034	1.1277	0	1.98415	2.15545	13.3078	449.951	321.194	634.93	709.142	576.227	0.146237	0.908577	-3.3666	-0.731295	-2.6353	TPM1	chr15:63357276:+;chr15:63357307:+	chr15_63065122_+
chr10:79601819-79601961:mpeak_9595|chr10_79552301_79686348_DLG5_NM_-|	217.19	-1.80231	1.08497	-1.66116	0.0966804	0.574625	1.1277	5.53783	22.8178	5.38862	3.32695	497.314	420.875	362.108	468.81	384.595	0.725943	2.59424	-1.65712	0.18026	-1.83739	DLG5	-	chr10_77842074_-
chr5:111530278-111530350:mpeak_57866|chr5_111500815_111755010_EPB41L4A_NM_-|	30.3203	0.978363	0.588967	1.66115	0.0966831	0.574625	22.5539	27.6892	30.7544	25.8654	23.954	20.2985	21.0438	48.6118	48.4976	33.9348	121.53	61.486	-0.0964232	-1.0794	0.982978	EPB41L4A	-	-
chr8:99591607-99591657:mpeak_69477|chr8_99468228_99954799_STK3_NM_-|	52.2066	-2.02353	1.21853	-1.66062	0.0967889	0.574625	0	2.21513	1.98415	4.3109	7.31928	99.2372	96.3583	84.3266	127.171	99.143	1.13251	4.38266	-2.0347	-0.0824125	-1.95229	STK3	chr8:99591606:-	chr8_98579379_-
chrX:67290473-67290523:mpeak_74653|chrX_67267005_67653299_OPHN1_NM_-|	6.18281	-3.04347	1.83309	-1.6603	0.0968547	0.574625	2.25539	1.10757	15.8732	0	9.98084	4.51078	12.1832	3.96831	8.62179	3.32695	20.1447	162.43	-2.35763	0.653721	-3.01135	OPHN1	-	-
chr17:73543693-73543743:mpeak_32895|chr17_73521782_73570951_LLGL2_NM_+|	314.3	-2.06631	1.24515	-1.65949	0.0970165	0.574625	0	3.3227	4.96039	0	12.6424	616.85	714.38	476.197	709.142	605.504	0.249596	0.982932	-1.82041	0.157083	-1.9775	LLGL2	-	-
chr5:64145709-64145764:mpeak_56779|chr5_64064744_64313985_CWC27_NM_+|	71.853	1.24524	0.750439	1.65935	0.0970449	0.574625	7.89387	5.53783	0.992077	8.62179	2.66156	111.642	116.294	156.748	158.425	149.713	5.89274	2.64052	0.714832	-0.443284	1.15812	CWC27	chr5:64145766:+	-
chr1:155753478-155753620:mpeak_5038|chr1_155720524_155829191_GON4L_NM_-|	6.14512	1.92035	1.15775	1.6587	0.0971771	0.574625	12.4047	6.6454	1.98415	3.23317	1.99617	7.89387	6.6454	4.96039	9.69951	5.9885	131.025	34.9349	1.98599	0.0788869	1.9071	GON4L	-	-
chr20:3180647-3180751:mpeak_43615|chr20_3171465_3185295_DDRGK1_NM_-|	249.056	1.17365	0.707607	1.65862	0.0971922	0.574625	9.02157	14.3984	7.93662	7.54407	1.99617	517.612	434.166	559.532	560.416	377.941	2.46065	1.16677	1.00725	-0.0692708	1.07652	DDRGK1	-	-
chr3:140955174-140955338:mpeak_50883|chr3_140950666_141011109_PXYLP1_NM_+|	23.1936	1.57693	0.951075	1.65805	0.097308	0.574625	28.1924	23.2589	21.8257	10.7772	3.99233	20.2985	26.5816	39.6831	19.399	37.9272	109.751	37.7235	1.07651	-0.464185	1.5407	PXYLP1	chr3:140955231:+;chr3:140955334:+	chr3_141236385_+;chr3_141236490_+
chrX:53706811-53706862:mpeak_74498|chrX_53560372_53713674_HUWE1_NM_-|	211.749	-1.91498	1.15502	-1.65796	0.0973247	0.574625	0	2.21513	2.97623	4.3109	5.32311	433.035	394.294	465.284	372.892	437.161	0.267745	0.988777	-1.92417	-0.0393838	-1.88478	HUWE1	chrX:53706809:-	-
chr2:73682287-73682449:mpeak_39660|chr2_73612885_73836694_ALMS1_NM_+|	12.1595	2.32261	1.40111	1.65769	0.09738	0.574625	32.7032	32.1194	10.9129	7.54407	13.9732	3.38309	3.3227	7.93662	9.69951	0	966.667	183.884	1.58413	-0.810093	2.39422	ALMS1	-	chr2_73455235_+;chr2_73455348_+
chr3:47702774-47702930:mpeak_48847|chr3_47629796_47823405_SMARCC1_NM_-|	370.311	1.02475	0.618203	1.65762	0.0973944	0.574625	15.7877	15.5059	7.93662	1.07772	8.65006	808.558	839.535	541.674	700.52	763.867	1.89878	0.880551	1.40999	0.301394	1.10859	SMARCC1	chr3:47702784:-	chr3_47661422_-
chr9:22447668-22447734:mpeak_70992|chr9_22446839_22451062_DMRTA1_NM_+|	5.72905	-2.967	1.79094	-1.65667	0.0975858	0.574625	1.1277	0	4.96039	7.54407	3.32695	7.89387	6.6454	5.95246	11.855	7.98467	7.75621	61.3808	-3.22638	-0.242012	-2.98436	DMRTA1	-	-
chr12:101790224-101790367:mpeak_17900|chr12_101789448_101801598_ARL1_NM_-|	478.611	-0.792324	0.478338	-1.65641	0.0976383	0.574625	18.0431	13.2908	26.7861	20.4768	31.2733	875.092	1017.85	812.511	1020.6	950.176	1.6553	2.8217	-0.740668	0.0288032	-0.769472	ARL1	-	chr12_101396504_-
chr6:168271058-168271109:mpeak_63777|chr6_168227670_168370461_MLLT4_NM_+|	75.6231	-2.72351	1.64435	-1.65628	0.097665	0.574625	1.1277	0	6.94454	3.23317	0	162.388	169.458	135.915	117.472	159.693	0.339825	2.46386	-2.589	0.269055	-2.85806	MLLT4	-	-
chr22:34161835-34161899:mpeak_47030|chr22_33670610_34316416_LARGE_NM_-|	35.9696	1.50332	0.907821	1.65596	0.0977295	0.574625	4.51078	9.9681	1.98415	2.15545	3.32695	57.5125	76.4221	68.4533	89.4511	45.9118	10.8104	3.66337	1.5404	-0.0207785	1.56118	LARGE	-	-
chr10:61865706-61865834:mpeak_9054|chr10_61789584_62493284_ANK3_NM_-|	161.964	1.00034	0.60409	1.65595	0.0977311	0.574625	16.9154	17.7211	15.8732	5.38862	10.6462	270.647	273.569	327.386	262.965	418.53	6.36448	3.16272	0.703334	-0.305541	1.00887	ANK3	-	-
chr1:63099166-63099222:mpeak_2462|chr1_62921127_63154039_DOCK7_NM_-|	7.3628	-2.25794	1.36511	-1.65404	0.0981197	0.575939	0	2.21513	6.94454	5.38862	8.65006	9.02157	7.75296	12.897	10.7772	9.98084	13.2053	62.3478	-2.65881	-0.41959	-2.23922	DOCK7	-	-
chr6:34950951-34951002:mpeak_61118|chr6_34857037_35056382_ANKS1A_NM_+|	17.1985	1.49869	0.906145	1.65392	0.0981438	0.575939	23.6816	11.0757	3.96831	6.46634	13.3078	19.1708	18.8286	22.8178	19.399	33.2695	91.4678	31.4527	1.13481	-0.405273	1.54008	ANKS1A	-	-
chr7:155094145-155094199:mpeak_67407|chr7_155089485_155099950_INSIG1_NM_+|	335.441	1.67243	1.01126	1.65382	0.0981651	0.575939	4.51078	15.5059	8.9287	2.15545	0	648.425	609.161	632.945	727.464	705.312	1.59168	0.536575	1.43767	-0.131026	1.5687	INSIG1	chr7:155094198:+	chr7_155302487_+
chr4:96051009-96051157:mpeak_54259|chr4_95679127_96075698_BMPR1B_NM_+|	53.2391	1.54202	0.932696	1.65329	0.0982717	0.576153	6.76617	7.75296	8.9287	4.3109	0	76.6833	69.7767	107.144	123.938	127.089	9.91338	3.69643	0.71806	-0.705183	1.42324	BMPR1B	-	-
chr12:110457214-110457279:mpeak_18214|chr12_110437234_110475163_ANKRD13A_NM_+|	35.3787	-2.3374	1.41449	-1.65247	0.0984397	0.576544	0	2.21513	6.94454	1.07772	7.31928	56.3848	83.0675	54.5643	105.617	36.5964	1.58845	7.79639	-2.20702	0.0881679	-2.29518	ANKRD13A	chr12:110457267:+	chr12_110019460_+
chr8:128909558-128909728:mpeak_70214|chr8_128902873_129113225_PVT1_NR_+|	12.3119	-3.1927	1.93285	-1.65181	0.0985735	0.576544	1.1277	0	3.96831	0	6.65389	15.7877	37.6573	15.8732	10.7772	31.2733	2.11001	18.3382	-2.65067	0.468862	-3.11953	PVT1	-	chr8_127897478_+
chr9:94797121-94797172:mpeak_71859|chr9_94794840_94877756_SPTLC1_NM_-|	847.44	-1.72163	1.04241	-1.65159	0.0986192	0.576544	1.1277	2.21513	8.9287	1.07772	8.65006	1290.08	1766.57	1483.16	1793.33	2119.26	0.109362	0.345762	-1.89557	-0.234909	-1.66066	SPTLC1	-	-
chr15:45893270-45893357:mpeak_24400|chr15_45879416_45898592_BLOC1S6_NM_+|	99.0024	-1.47846	0.895297	-1.65136	0.0986653	0.576544	2.25539	6.6454	0.992077	4.3109	5.32311	290.945	379.895	134.923	86.2179	78.5159	1.32681	3.54609	0.329357	1.74762	-1.41827	BLOC1S6	chr15:45893361:+	chr15_45601178_+
chr11:34098104-34098199:mpeak_12072|chr11_34073229_34120849_CAPRIN1_NM_+|	526.523	0.906724	0.549234	1.65089	0.0987614	0.576544	36.0863	31.0119	29.7623	14.0104	22.6232	855.921	935.894	834.337	1072.34	1433.25	3.7447	1.98795	0.600139	-0.31343	0.913569	CAPRIN1	-	chr11_34076618_+
chr12:42720171-42720221:mpeak_15875|chr12_42719946_42840393_PPHLN1_NM_+|	12.2157	-3.90664	2.36677	-1.65062	0.0988156	0.576544	0	0	9.92077	0	0	20.2985	23.2589	32.7386	22.6322	13.3078	0	14.4452	-Inf	-0.0719785	-Inf	PPHLN1	-	-
chr8:30437786-30437927:mpeak_68100|chr8_30436554_30515738_GTF2E2_NM_-|	108.223	-1.32075	0.80036	-1.65019	0.0989038	0.576544	6.76617	2.21513	16.8653	12.9327	8.65006	174.793	210.438	145.835	243.566	260.167	2.33141	5.91902	-1.51295	-0.168797	-1.34415	GTF2E2	-	-
chr17:49079062-49079190:mpeak_31796|chr17_49043748_49198226_SPAG9_NM_-|	49.2647	-2.57495	1.56039	-1.65019	0.098904	0.576544	0	0	4.96039	9.69951	6.65389	25.937	23.2589	125.002	140.104	157.032	0	5.04901	-Inf	-2.51614	-Inf	SPAG9	-	-
chr15:78828935-78829059:mpeak_25623|chr15_78799905_78829641_HYKK_NM_+|	6.8056	1.99579	1.20977	1.64972	0.0989998	0.576544	11.277	13.2908	4.96039	9.69951	3.32695	2.25539	4.43027	8.9287	3.23317	6.65389	367.47	95.5946	1.03479	-0.907838	1.94262	HYKK	chr15:78828987:+;chr15:78829060:+	chr15_78536644_+;chr15_78536712_+
chr11:65733544-65733690:mpeak_12984|chr11_65729159_65746482_SART1_NM_+|	41.7381	1.53888	0.932923	1.64952	0.0990409	0.576544	38.3417	8.86053	11.9049	12.9327	3.99233	67.6617	57.5934	61.5088	61.4303	93.1545	37.6848	13.3414	1.29625	-0.201823	1.49807	SART1	-	chr11_65966125_+;chr11_65966140_+
chr9:101551885-101551943:mpeak_72153|chr9_101498905_101558794_ANKS6_NM_-|	14.5977	-3.06971	1.8614	-1.64914	0.0991195	0.576593	0	1.10757	0	8.62179	4.65772	33.8309	21.0438	28.7702	14.0104	33.9348	2.01836	17.3101	-2.99877	0.101584	-3.10036	ANKS6	chr9:101551886:-	-
chrX:118975036-118975228:mpeak_75352|chrX_118968990_118986991_UPF3B_NM_-|	20.4194	1.65511	1.00461	1.64752	0.0994518	0.578117	4.51078	7.75296	0.992077	3.23317	3.32695	32.7032	28.7967	29.7623	62.508	30.6079	19.9411	6.14608	1.28439	-0.413611	1.69801	UPF3B	-	chrX_119841143_-;chrX_119841168_-
chr8:18530636-18530686:mpeak_67809|chr8_18393468_18871196_PSD3_NM_-|	18.0866	-2.22539	1.35118	-1.647	0.099558	0.578324	0	2.21513	0	4.3109	3.99233	47.3632	46.5178	25.794	19.399	31.2733	2.35951	10.8587	-1.32132	0.880971	-2.20229	PSD3	-	-
chr11:32997124-32997176:mpeak_12009|chr11_32914723_32997879_QSER1_NM_+|	29.7834	-2.02262	1.22891	-1.64586	0.0997932	0.578454	2.25539	2.21513	0.992077	15.0881	3.32695	59.7679	75.3145	52.5801	37.7203	48.5734	3.30948	13.9747	-1.53311	0.545027	-2.07814	QSER1	chr11:32997176:+	chr11_32975604_+;chr11_32975629_+
chr17:7792972-7793106:mpeak_29830|chr17_7788122_7814781_CHD3_NM_+|	716.418	-1.93468	1.17562	-1.64567	0.099832	0.578454	1.1277	1.10757	4.96039	3.23317	5.9885	1378.04	1253.77	1721.25	1680.17	1114.53	0.0849325	0.314044	-2.08059	-0.194013	-1.88658	CHD3	-	chr17_7889712_+;chr17_7889760_+
chr1:6257705-6257793:mpeak_222|chr1_6246876_6259679_RPL22_NM_-|	1202.25	-1.72848	1.05086	-1.64482	0.100006	0.578454	2.25539	1.10757	3.96831	0	8.65006	2500.1	2786.64	1985.15	2166.22	2568.4	0.0636112	0.18778	-1.32276	0.238928	-1.56169	RPL22	chr1:6257731:-;chr1:6257781:-	chr1_6197708_-
chr2:233429589-233429662:mpeak_43188|chr2_233415296_233445613_EIF4E2_NM_+|	37.556	1.42819	0.868541	1.64436	0.100103	0.578454	3.38309	7.75296	3.96831	4.3109	2.66156	42.8524	56.4859	59.5246	103.461	91.1583	11.2102	4.30494	0.610487	-0.770264	1.38075	EIF4E2	chr2:233429644:+	chr2_232564933_+
chr3:62311949-62312008:mpeak_49348|chr3_62304647_62318929_C3orf14_NM_+|	1010.9	1.33403	0.811342	1.64422	0.100131	0.578454	2.25539	9.9681	0	3.23317	3.32695	1997.15	2173.05	1777.8	2280.46	1861.76	0.293116	0.110812	1.48283	0.0794738	1.40335	C3orf14	chr3:62312007:+	-
chr17:58307947-58308239:mpeak_32207|chr17_58256789_58469586_USP32_NM_-|	418.073	-0.948818	0.577077	-1.64418	0.100139	0.578454	12.4047	15.5059	27.7782	15.0881	23.954	822.09	994.595	612.112	973.185	684.02	1.53635	2.94451	-0.674512	0.264013	-0.938525	USP32	-	-
chr21:35287594-35287653:mpeak_45802|chr21_35275943_35288158_ATP5O_NM_-|	644.32	-1.95824	1.19102	-1.64417	0.100141	0.578454	0	2.21513	4.96039	4.3109	3.32695	1169.42	1488.57	964.299	1501.27	1304.83	0.0833387	0.334135	-1.92279	0.0805817	-2.00337	ATP5O	chr21:35287591:-	chr21_33915290_-
chr1:115256344-115256545:mpeak_3806|chr1_115250671_115259515_NRAS_NM_-mpeak_3806|chr1_115250671_115259515_NRAS_NM_-||	1160.76	1.09994	0.669001	1.64416	0.100144	0.578454	11.277	9.9681	4.96039	2.15545	6.65389	2413.27	2274.94	1713.32	2458.29	2712.79	0.453159	0.200014	1.21059	0.0306694	1.17992	NRAS	-	-
chr1:155197035-155197128:mpeak_4962|chr1_155184264_155197325_GBAP1_NR_-|	77.9907	-1.45631	0.886186	-1.64334	0.100312	0.579018	2.25539	3.3227	2.97623	7.54407	8.65006	182.687	147.306	144.843	169.203	111.12	1.69037	4.50891	-1.19607	0.219372	-1.41544	GBAP1	chr1:155197033:-	chr1_155227234_-
chr4:123111194-123111249:mpeak_54808|chr4_123091757_123283185_KIAA1109_NM_+|	65.7861	1.0446	0.636055	1.64231	0.100526	0.579612	20.2985	32.1194	11.9049	12.9327	11.977	92.471	140.661	90.279	94.8397	150.378	22.4842	10.9732	1.09474	0.0598109	1.03493	KIAA1109	-	-
chr1:155641531-155641581:mpeak_5014|chr1_155630724_155658823_YY1AP1_NM_-|	133.657	-1.95863	1.19272	-1.64216	0.100556	0.579612	1.1277	1.10757	2.97623	4.3109	3.32695	260.498	338.915	201.392	278.053	244.863	0.372908	1.46541	-1.6625	0.31191	-1.97441	YY1AP1	chr1:155641530:-	chr1_155671740_-
chr12:69634652-69634708:mpeak_17188|chr12_69633316_69663291_CPSF6_NM_+|	143.393	-1.92262	1.17113	-1.64167	0.100658	0.579718	2.25539	0	3.96831	1.07772	4.65772	298.839	341.13	271.829	258.654	251.517	0.352422	1.24089	-1.5202	0.295798	-1.816	CPSF6	chr12:69634704:+	chr12_69240922_+
chr15:63968980-63969030:mpeak_25048|chr15_63901465_64126147_HERC1_NM_-|	8.28733	-3.7747	2.2998	-1.64132	0.100732	0.579718	0	0	0	0	6.65389	10.1493	23.2589	12.897	8.62179	21.2925	0	15.5424	-Inf	0.227173	-Inf	HERC1	-	chr15_63676781_-
chr7:99613299-99613357:mpeak_66087|chr7_99613194_99630927_ZKSCAN1_NM_+|	609.6	-1.50157	0.915132	-1.64082	0.100835	0.579718	3.38309	1.10757	3.96831	6.46634	3.32695	1379.17	1592.68	1210.33	1029.23	866.337	0.151106	0.44308	-1.03069	0.521315	-1.552	ZKSCAN1	chr7:99613350:+	-
chr11:70050040-70050108:mpeak_13283|chr11_70049268_70052238_FADD_NM_+|	30.2156	-2.95353	1.80021	-1.64066	0.100869	0.579718	1.1277	0	3.96831	9.69951	0	63.151	53.1632	52.5801	67.8966	50.5696	0.969526	7.99072	-3.01437	0.0286023	-3.04297	FADD	-	chr11_70203991_+
chr5:179437911-179437965:mpeak_59813|chr5_179382669_179499118_RNF130_NM_-|	39.3197	-2.08983	1.27447	-1.63975	0.101056	0.579718	2.25539	0	4.96039	3.23317	2.66156	107.131	73.0994	73.4137	45.2644	81.1775	1.25139	5.43148	-1.68196	0.435847	-2.11781	RNF130	chr5:179437914:-	chr5_180010915_-;chr5_180010952_-
chr14:104303977-104304121:mpeak_23629|chr14_104201532_104313927_PPP1R13B_NM_-|	7.5821	-3.23864	1.9752	-1.63965	0.101078	0.579718	1.1277	0	7.93662	0	8.65006	6.76617	15.5059	8.9287	12.9327	13.9732	5.06327	46.2868	-3.29361	-0.101151	-3.19246	PPP1R13B	-	-
chr17:57833740-57833791:mpeak_32124|chr17_57784862_57917128_VMP1_NM_+|	1034.73	-2.55734	1.55997	-1.63935	0.10114	0.579718	1.1277	0	0.992077	1.07772	6.65389	2059.17	2005.8	2004	2278.31	1990.18	0.0277418	0.139079	-2.3666	-0.0408278	-2.32577	VMP1	chr17:57833793:+	chr17_59756430_+
chr1:109824028-109824171:mpeak_3470|chr1_109822778_109825790_PSRC1_NM_-|	45.571	-1.98984	1.21401	-1.63907	0.101199	0.579718	2.25539	0	8.9287	7.54407	1.99617	73.3002	74.2069	95.2394	93.762	98.4776	1.529	6.42445	-2.44869	-0.377709	-2.07098	PSRC1	chr1:109824026:-;chr1:109824090:-	chr1_109281405_-;chr1_109281476_-
chr17:49280054-49280255:mpeak_31813|chr17_49258055_49337427_MBTD1_NM_-|	12.7562	-1.63268	0.996202	-1.63891	0.101232	0.579718	10.1493	3.3227	7.93662	7.54407	7.31928	18.0431	40.98	6.94454	14.0104	11.3116	22.8249	70.6613	-0.174109	1.4562	-1.63031	MBTD1	-	-
chr12:51890804-51890912:mpeak_16324|chr12_51785100_51901209_SLC4A8_NM_+|	10.2334	-1.92204	1.17304	-1.63851	0.101314	0.579718	4.51078	8.86053	25.794	9.69951	5.32311	10.1493	16.6135	8.9287	6.46634	5.9885	49.9624	190.879	-1.02505	0.908688	-1.93374	SLC4A8	-	-
chr12:64583977-64584027:mpeak_17003|chr12_64581432_64616076_C12orf66_NM_-|	4.81979	-3.47505	2.12127	-1.63819	0.101382	0.579718	0	0	6.94454	0	1.99617	4.51078	8.86053	5.95246	8.62179	11.3116	0	34.539	-Inf	-0.368061	-Inf	C12orf66	chr12:64583974:-	chr12_64190197_-
chr6:56869412-56869583:mpeak_61703|chr6_56819772_56890879_BEND6_NM_+|	462.53	-1.45828	0.890283	-1.638	0.101422	0.579718	1232.57	784.157	1064.5	892.355	631.454	5.63848	7.75296	2.97623	3.23317	0.665389	15059.8	37649.3	0.22497	1.54689	-1.32192	BEND6	-	chr6_57004732_+
chr20:47252266-47252325:mpeak_44808|chr20_47242465_47444420_PREX1_NM_-|	714.593	1.25835	0.769174	1.63597	0.101845	0.580798	20.2985	9.9681	4.96039	5.38862	0	2082.85	2040.14	899.814	884.811	1197.7	0.734094	0.347011	2.1332	1.05222	1.08098	PREX1	-	-
chr1:246357133-246357226:mpeak_7653|chr1_245912966_246670644_SMYD3_NM_-|	32.3313	1.08203	0.661428	1.63591	0.101859	0.580798	20.2985	16.6135	6.94454	15.0881	18.6309	31.5755	40.98	60.5167	61.4303	51.235	50.8742	23.4803	0.445316	-0.67017	1.11549	SMYD3	-	-
chr4:728158-728268:mpeak_52498|chr4_699572_759819_PCGF3_NM_+|	102.032	0.974566	0.595875	1.63552	0.10194	0.580798	64.2787	84.175	46.6276	48.4976	59.2196	117.28	118.51	95.2394	156.27	230.225	62.9601	32.0394	0.528818	-0.445772	0.97459	PCGF3	chr4:728212:+;chr4:728263:+	chr4_734473_+
chr5:179313971-179314083:mpeak_59803|chr5_179291128_179334856_TBC1D9B_NM_-|	166.588	0.927645	0.567215	1.63544	0.101958	0.580798	11.277	21.0438	11.9049	8.62179	7.31928	287.562	327.84	342.267	368.582	279.463	5.25197	2.81184	0.799952	-0.101391	0.901343	TBC1D9B	chr5:179313950:-;chr5:179313975:-;chr5:179314044:-	chr5_179886977_-;chr5_179887044_-
chr5:179671459-179671516:mpeak_59821|chr5_179663531_179719071_MAPK9_NM_-|	102.039	-1.49992	0.91716	-1.6354	0.101965	0.580798	2.25539	3.3227	7.93662	1.07772	10.6462	214.262	214.868	158.732	181.058	226.232	1.29986	3.47346	-1.2325	0.185519	-1.41802	MAPK9	-	-
chr13:113200793-113200850:mpeak_20742|chr13_113140465_113242499_TUBGCP3_NM_-|	82.2732	1.01705	0.622432	1.63399	0.10226	0.582074	25.937	34.3346	21.8257	19.399	14.6386	106.003	141.768	98.2157	161.659	198.951	24.3254	12.1753	0.694539	-0.303971	0.99851	TUBGCP3	chr13:113200796:-	chr13_112546486_-
chr4:6676385-6676454:mpeak_52778|chr4_6675820_6676719_LOC93622_NR_+|	30.5634	1.33109	0.814954	1.63333	0.102399	0.582289	7.89387	6.6454	2.97623	9.69951	3.99233	31.5755	40.98	51.588	79.7516	70.5312	20.0388	8.25681	0.387829	-0.891314	1.27914	LOC93622	chr4:6676455:+	chr4_6674727_+
chr3:25792518-25792575:mpeak_48295|chr3_25761126_25831530_NGLY1_NM_-|	16.8999	-2.98567	1.82871	-1.63267	0.102539	0.582289	1.1277	0	0	3.23317	6.65389	21.4262	50.9481	20.8336	30.1763	34.6002	1.55814	11.5489	-2.5472	0.342658	-2.88986	NGLY1	chr3:25792516:-	chr3_25751000_-;chr3_25751044_-
chr1:16893668-16893731:mpeak_645|chr1_16890681_16940100_NBPF1_NM_-|	69.9102	1.02362	0.626965	1.63266	0.102541	0.582289	41.7247	42.0875	24.8019	7.54407	10.6462	138.707	142.876	79.3662	100.228	111.12	29.7647	14.7885	1.54805	0.538918	1.00913	NBPF1	chr1:16893674:-	-
chr6:31860940-31860994:mpeak_60901|chr6_31848041_31865484_EHMT2_NM_-|	69.3125	1.48854	0.912022	1.63214	0.102651	0.582289	2.25539	13.2908	6.94454	2.15545	11.977	77.811	54.2708	188.495	156.27	179.655	11.7701	4.01911	0.145854	-1.40433	1.55018	EHMT2	chr6:31860943:-	chr6_31893167_-
chr1:3758374-3758430:mpeak_204|chr1_3732081_3773797_CEP104_NM_-|	12.1957	-1.72343	1.05597	-1.63208	0.102662	0.582289	2.25539	5.53783	10.9129	6.46634	9.31545	27.0647	15.5059	21.8257	15.0881	7.98467	18.3066	59.4555	-1.1913	0.508153	-1.69945	CEP104	chr1:3758373:-	chr1_3841810_-
chr14:24682604-24682670:mpeak_21157|chr14_24679141_24683036_CHMP4A_NM_-|	121.103	-1.13113	0.693182	-1.63179	0.102723	0.582289	9.02157	5.53783	21.8257	7.54407	10.6462	254.859	259.171	228.178	239.255	174.997	2.8324	6.22885	-0.873664	0.263275	-1.13694	CHMP4A	-	-
chr18:199190-199248:mpeak_33377|chr18_158482_211132_USP14_NM_+|	256.082	0.878113	0.538544	1.63053	0.102989	0.582408	12.4047	17.7211	6.94454	7.54407	9.98084	486.037	506.158	438.498	503.297	572.235	3.03627	1.61618	0.884977	-0.0247361	0.909713	USP14	-	chr18_199248_+
chr11:47447697-47447965:mpeak_12314|chr11_47440496_47448024_PSMC3_NM_-|	410.5	-1.0912	0.669264	-1.63045	0.103007	0.582408	14.66	5.53783	25.794	30.1763	15.3039	860.432	663.432	920.648	954.863	614.154	1.32544	2.8628	-1.23421	-0.123255	-1.11096	PSMC3	-	chr11_47426364_-
chr5:169015470-169015586:mpeak_59378|chr5_169010637_169031063_SPDL1_NM_+|	21.1268	1.93255	1.18534	1.63037	0.103023	0.582408	14.66	8.86053	8.9287	1.07772	5.32311	27.0647	22.1513	11.9049	47.4198	63.8774	47.7905	12.4426	1.20257	-0.738865	1.94144	SPDL1	-	-
chr2:240908590-240908691:mpeak_43377|chr2_240900603_240964819_NDUFA10_NM_-|	123.217	-2.54459	1.56076	-1.63035	0.103028	0.582408	0	1.10757	2.97623	5.38862	2.66156	239.071	225.944	265.877	280.208	208.932	0.238179	1.46042	-2.73054	-0.11427	-2.61627	NDUFA10	chr2:240908595:-;chr2:240908637:-	-
chr7:150820667-150820730:mpeak_67307|chr7_150782917_150840823_AGAP3_NM_+|	168.487	-0.689393	0.423087	-1.62944	0.10322	0.582813	152.239	137.338	229.17	181.058	182.317	171.41	181.641	174.606	165.969	109.124	82.0214	131.765	-0.448012	0.235878	-0.68389	AGAP3	chr7:150820725:+	chr7_151123591_+;chr7_151123638_+
chr3:183854672-183854848:mpeak_51861|chr3_183852809_183862671_EIF2B5_NM_+|	208.451	-0.568633	0.348997	-1.62934	0.103242	0.582813	94.7264	83.0675	161.709	165.969	175.663	236.816	244.772	272.821	367.504	281.46	36.9182	54.605	-0.916367	-0.351667	-0.5647	EIF2B5	chr3:183854768:+	chr3_184136906_+;chr3_184136995_+
chr19:19603379-19603498:mpeak_35818|chr19_19496641_19616152_GATAD2A_NM_+|	109.214	1.07542	0.660589	1.62797	0.103531	0.583742	24.8093	24.3665	2.97623	3.23317	3.99233	285.307	428.628	122.026	96.9951	99.8084	6.88799	3.19975	2.85409	1.74797	1.10612	GATAD2A	-	chr19_19492617_+;chr19_19492664_+
chr10:94333671-94333724:mpeak_9970|chr10_94214296_94333852_IDE_NM_-|	71.5714	1.22387	0.751812	1.62789	0.103549	0.583742	40.597	15.5059	26.7861	19.399	8.65006	91.3433	95.2507	119.049	140.104	159.028	30.0669	13.1128	0.617938	-0.579263	1.1972	IDE	-	-
chr17:30377297-30377384:mpeak_30701|chr17_30348154_30380284_LRRC37B_NM_+|	29.9906	2.18284	1.3415	1.62716	0.103702	0.583894	42.8524	76.4221	65.4771	71.1298	27.9463	1.1277	1.10757	5.95246	3.23317	4.65772	5336.04	1188.68	0.120694	-2.04572	2.16641	LRRC37B	-	-
chr3:196509598-196509709:mpeak_52301|chr3_196466727_196555189_PAK2_NM_+|	646.707	0.843131	0.518212	1.627	0.103737	0.583894	46.2355	17.7211	18.8495	22.6322	21.9578	1152.5	1124.18	1450.42	1367.63	1244.94	2.8092	1.5614	0.596674	-0.250645	0.847319	PAK2	chr3:196509705:+	chr3_196782833_+
chr8:104434729-104434779:mpeak_69737|chr8_104426941_104455022_DCAF13_NM_+|	218.537	1.47856	0.908899	1.62676	0.103789	0.583894	7.89387	4.43027	2.97623	5.38862	0	368.756	445.242	347.227	594.904	408.549	1.51402	0.619307	1.14404	-0.145626	1.28966	DCAF13	-	-
chr7:99667588-99667653:mpeak_66105|chr7_99662535_99680171_ZNF3_NM_-|	13.115	1.84165	1.13295	1.62554	0.104048	0.584028	14.66	35.4421	13.8891	21.5545	17.9655	3.38309	2.21513	7.93662	10.7772	3.32695	894.966	242.319	0.492751	-1.39217	1.88493	ZNF3	chr7:99667596:-	chr7_100069979_-
chr5:34954555-34954617:mpeak_56272|chr5_34929697_34954657_DNAJC21_NM_+|	66.1372	-1.54563	0.950902	-1.62544	0.104069	0.584028	2.25539	4.43027	10.9129	0	8.65006	171.41	140.661	110.121	99.1506	113.782	2.14235	6.05564	-0.964017	0.535066	-1.49908	DNAJC21	chr5:34954607:+	chr5_34954501_+
chr12:12674350-12674404:mpeak_15269|chr12_12630949_12715448_DUSP16_NM_-|	70.0989	-2.7696	1.70403	-1.62533	0.104093	0.584028	1.1277	0	4.96039	0	11.3116	93.5987	114.079	138.891	202.612	134.409	0.543002	3.41912	-3.26598	-0.611382	-2.6546	DUSP16	-	-
chr4:77590301-77590345:mpeak_53888|chr4_77356252_77699961_SHROOM3_NM_+|	56.4959	-2.53869	1.56198	-1.62531	0.104098	0.584028	1.1277	0	1.98415	3.23317	4.65772	101.493	111.864	115.081	116.394	109.124	0.528549	2.89932	-2.54545	-0.0898434	-2.4556	SHROOM3	-	chr4_76669198_+
chr5:79960956-79961006:mpeak_57385|chr5_79950466_80171569_MSH3_NM_+|	29.8102	-2.96259	1.82447	-1.62381	0.104417	0.585421	1.1277	0	9.92077	4.3109	0	62.0233	48.7329	71.4296	50.653	49.9042	1.01818	8.27486	-3.07269	-0.0499479	-3.02274	MSH3	-	-
chr4:100842612-100842712:mpeak_54329|chr4_100822309_100867883_DNAJB14_NM_-|	226.543	-2.20296	1.35735	-1.62299	0.104592	0.585999	1.1277	1.10757	6.94454	6.46634	0	419.503	602.516	280.758	483.898	463.111	0.21871	1.0923	-1.99993	0.320348	-2.32027	DNAJB14	chr4:100842661:-	chr4_99921505_-
chr9:12777520-12777581:mpeak_70822|chr9_12775011_12821384_LURAP1L_NM_+|	15.8286	1.49136	0.919191	1.62247	0.104703	0.586224	6.76617	14.3984	4.96039	7.54407	1.99617	16.9154	26.5816	21.8257	28.0208	29.2771	48.6574	18.3265	1.1305	-0.27823	1.40873	LURAP1L	chr9:12777577:+	chr9_12777577_+
chr3:184050835-184050899:mpeak_51913|chr3_184032282_184052514_EIF4G1_NM_+|	756.657	-1.92435	1.18726	-1.62083	0.105054	0.587786	1.1277	1.10757	6.94454	0	4.65772	1535.92	1579.39	1219.26	1494.8	1723.36	0.0717508	0.261464	-1.79093	0.0746164	-1.86554	EIF4G1	-	-
chr4:39291462-39291601:mpeak_53214|chr4_39290464_39368001_RFC1_NM_-|	45.7597	1.47584	0.911087	1.61986	0.105262	0.588549	6.76617	11.0757	2.97623	0	7.31928	81.1941	73.0994	79.3662	123.938	71.862	11.5636	3.74156	1.37821	-0.249665	1.62788	RFC1	chr4:39291468:-	-
chr10:104687872-104687928:mpeak_10462|chr10_104678074_104836727_CNNM2_NM_+|	6.84463	2.26834	1.40101	1.61907	0.105432	0.589097	5.63848	5.53783	2.97623	3.23317	1.99617	2.25539	8.86053	4.96039	9.69951	23.2886	100.543	21.6229	1.03073	-1.18645	2.21718	CNNM2	chr10:104687929:+	chr10_102928171_+
chr7:23658911-23659053:mpeak_64488|chr7_23636997_23682549_CCDC126_NM_+|	22.3153	-1.16117	0.717486	-1.61838	0.10558	0.589525	28.1924	33.227	24.8019	29.0985	23.2886	18.0431	36.5497	6.94454	9.69951	13.3078	112.505	257.711	0.255259	1.45103	-1.19577	CCDC126	-	-
chr11:658909-658960:mpeak_11275|chr11_644654_695754_DEAF1_NM_-|	22.6234	-2.28897	1.41525	-1.61737	0.105799	0.590345	0	2.21513	0.992077	1.07772	5.9885	56.3848	62.0237	32.7386	44.1867	20.6271	1.87075	8.2605	-1.27812	0.864487	-2.14261	DEAF1	chr11:658914:-	chr11_658909_-
chr10:72580190-72580252:mpeak_9344|chr10_72575703_72636951_SGPL1_NM_+|	210.6	1.37457	0.850357	1.61646	0.105995	0.590711	2.25539	8.86053	0.992077	5.38862	0.665389	429.652	423.09	403.776	458.033	373.283	1.30355	0.570491	1.2427	0.0505266	1.19217	SGPL1	chr10:72580253:+	chr10_70820493_+
chr10:28878705-28878790:mpeak_8486|chr10_28821516_28908465_WAC_NM_+|	306.767	1.05856	0.655095	1.61589	0.106118	0.590711	29.3201	12.1832	8.9287	2.15545	6.65389	713.831	860.579	466.276	426.779	540.961	2.63612	1.23695	1.81134	0.719713	1.09163	WAC	-	chr10_28589783_+
chr6:151859333-151859446:mpeak_63457|chr6_151815174_151939081_CCDC170_NM_+|	108.108	0.881718	0.545691	1.61578	0.106141	0.590711	18.0431	17.7211	5.95246	7.54407	12.6424	213.134	210.438	172.621	213.389	209.598	8.44347	4.38861	1.03728	0.093206	0.944073	CCDC170	-	-
chr9:3522901-3523047:mpeak_70713|chr9_3225280_3526001_RFX3_NM_-|	4.03167	-3.92878	2.43202	-1.61544	0.106215	0.590711	4.51078	0	0	4.3109	5.9885	2.25539	19.9362	1.98415	0	1.33078	20.3265	310.697	-0.606148	3.32792	-3.93407	RFX3	chr9:3522910:-;chr9:3522996:-	chr9_3522911_-;chr9_3522997_-
chr15:41730590-41730641:mpeak_24139|chr15_41709301_41772778_RTF1_NM_+|	118.834	1.45134	0.898438	1.6154	0.106224	0.590711	6.76617	8.86053	1.98415	3.23317	0	292.073	364.389	138.891	169.203	202.944	2.38044	1.02093	2.16759	0.946247	1.22135	RTF1	-	chr15_41438425_+
chr7:132657670-132657728:mpeak_66864|chr7_132470421_132766828_CHCHD3_NM_-|	42.1682	-1.7284	1.07021	-1.615	0.10631	0.590787	0	4.43027	0	6.46634	5.9885	122.919	94.1431	61.5088	60.3525	65.8735	2.04101	6.63427	-0.90628	0.794373	-1.70065	CHCHD3	chr7:132657679:-	chr7_132972915_-
chr7:7836544-7836594:mpeak_64237|chr7_7680266_7916911_UMAD1_NM_+|	18.9296	-2.61415	1.61999	-1.61368	0.106596	0.591298	0	1.10757	3.96831	4.3109	5.32311	24.8093	33.227	31.7465	35.5649	49.2388	1.9084	11.6708	-3.03342	-0.420961	-2.61246	UMAD1	chr7:7836595:+	chr7_7796963_+
chr7:129831170-129831304:mpeak_66803|chr7_129806345_129845338_TMEM209_NM_-|	7.11625	-3.24304	2.0098	-1.61361	0.106612	0.591298	0	1.10757	0.992077	4.3109	3.32695	29.3201	4.43027	13.8891	6.46634	7.31928	3.28164	31.1834	-2.37699	0.871297	-3.24829	TMEM209	chr7:129831168:-	chr7_130191330_-;chr7_130191371_-
chr6:3089804-3089887:mpeak_59946|chr6_3077057_3113286_RIPK1_NM_+|	23.7361	1.07601	0.666843	1.61358	0.106618	0.591298	19.1708	24.3665	13.8891	10.7772	5.9885	33.8309	33.227	31.7465	29.0985	35.2656	64.925	31.8953	1.0911	0.0656728	1.02543	RIPK1	chr6:3089891:+	chr6_3089653_+
chr17:34154288-34154409:mpeak_30805|chr17_34136458_34173909_TAF15_NM_+|	186.212	-2.52971	1.56828	-1.61304	0.106735	0.591548	0	1.10757	2.97623	3.23317	2.66156	349.586	436.381	332.346	408.457	325.375	0.140918	0.832033	-2.41673	0.145054	-2.56179	TAF15	-	-
chr2:114201424-114201605:mpeak_40713|chr2_114195267_114253213_CBWD2_NM_+|	84.3813	0.96279	0.597319	1.61185	0.106994	0.59255	122.919	137.338	81.3503	127.171	157.697	22.5539	35.4421	38.691	61.4303	59.2196	448.75	229.834	0.0921932	-0.873128	0.965321	CBWD2	-	-
chr4:8472177-8472279:mpeak_52850|chr4_8442531_8477498_TRMT44_NM_+|	3.58398	-4.32693	2.6852	-1.6114	0.107092	0.59255	0	0	2.97623	0	4.65772	10.1493	4.43027	0	4.3109	9.31545	0	56.0235	-Inf	0.682508	-Inf	TRMT44	-	chr4_8470503_+
chr19:12401784-12401895:mpeak_35370|chr19_12384878_12405714_ZNF44_NM_-|	6.29701	-2.53298	1.57256	-1.61073	0.107238	0.59255	2.25539	0	4.96039	2.15545	6.65389	9.02157	13.2908	3.96831	14.0104	6.65389	10.1083	55.9004	-2.02509	0.442236	-2.46732	ZNF44	chr19:12401783:-;chr19:12401843:-	chr19_12290969_-;chr19_12291030_-
chr20:20031108-20031267:mpeak_43973|chr20_20017006_20036690_CRNKL1_NM_-|	87.4631	1.07169	0.665419	1.61055	0.107277	0.59255	51.874	31.0119	29.7623	10.7772	13.9732	157.877	152.844	148.812	106.695	171.005	26.6753	12.7811	1.1895	0.128001	1.06149	CRNKL1	-	chr20_20050473_-
chr11:120328780-120328939:mpeak_14511|chr11_120207617_120355775_ARHGEF12_NM_+|	109.401	0.890395	0.552909	1.61038	0.107314	0.59255	16.9154	12.1832	5.95246	7.54407	9.31545	216.518	202.685	193.455	197.223	232.221	6.94144	3.66223	0.936124	0.0136098	0.922514	ARHGEF12	-	chr11_120458107_+
chr22:24463448-24463554:mpeak_46702|chr22_24407764_24574020_CABIN1_NM_+|	27.825	-1.55732	0.967144	-1.61022	0.107349	0.59255	0	5.53783	5.95246	5.38862	11.977	47.3632	53.1632	56.5484	51.7307	40.5887	5.50883	15.6636	-1.48909	0.0185044	-1.5076	CABIN1	chr22:24463553:+	chr22_24067622_+
chr20:46318324-46318408:mpeak_44771|chr20_46287136_46415360_SULF2_NM_-|	387.19	-1.38774	0.862468	-1.60903	0.10761	0.593591	3.38309	2.21513	12.897	4.3109	8.65006	666.468	714.38	747.034	655.256	1057.3	0.405419	1.05131	-1.62261	-0.247903	-1.3747	SULF2	chr20:46318344:-	chr20_47689601_-;chr20_47689625_-
chr19:11347764-11347826:mpeak_35303|chr19_11310215_11373168_DOCK6_NM_-|	80.1339	1.91018	1.1875	1.60857	0.10771	0.593744	4.51078	6.6454	6.94454	0	0	74.4279	171.673	202.384	158.425	176.328	4.53318	1.29288	1.26885	-0.54108	1.80993	DOCK6	chr19:11347772:-	chr19_11237096_-
[truncated: 6,719 more rows]
