# Supplementary material for: Compartment-specific and ELAVL1-coordinated regulation of intronic polyadenylation isoforms by doxorubicin
Source: HighWire-hosted journal article supplement (doi:10.1101/gr.276192.121), 2022-07-01
Supplement: Supplemental_Table_S20.xlsx.xlsx [file Supplemental_Table_S20.xlsx.xlsx]

## Sheet: Feuil1
Supplemental Table S20 : List of IPA isoforms upregulated by Doxo and regulated by siELAVL1 in cytosol.
chr_3seq	start_win	end_win	peak_3seq	gene_seq	strand_3seq	chr_TE	start_TE	end_TE	peak_TE	gene_TE	strand_TE	coordinates_mergeIPA
chr1	12567353	12567856	mpeak_10	chr1:12290095_12572098_VPS13D_NM_+	+	chr1	12567503	12567703	mpeak_3	chr1_12290095_12568946_VPS13D_NM_+	+	chr1:12567503-12567706|mpeak_10
chr1	226175441	226176019	mpeak_106	chr1:226170402_226187066_SDE2_NM_-	-	chr1	226175591	226175874	mpeak_37	chr1_226173224_226187066_SDE2_NM_-	-	chr1:226175591-226175869|mpeak_106
chr1	16928721	16929071	mpeak_14	chr1:16888921_16940100_NBPF1_NM_-	-	chr1	16928886	16928965	mpeak_6	chr1_16890681_16940100_NBPF1_NM_-	-	chr1:16928871-16928921|mpeak_14
chr1	43876230	43876580	mpeak_26	chr1:43855555_43919918_SZT2_NM_+	+	chr1	43876380	43876430	mpeak_12	chr1_43855555_43916007_SZT2_NM_+	+	chr1:43876380-43876430|mpeak_26
chr1	82190044	82190438	mpeak_33	chr1:82165454_82458422_ADGRL2_NM_+	+	chr1	82190210	82190295	mpeak_17	chr1_82165454_82456074_ADGRL2_NM_+	+	chr1:82190194-82190288|mpeak_33
chr1	174188162	174188595	mpeak_86	chr1:174128551_174964445_RABGAP1L_NM_+	+	chr1	174188355	174188445	mpeak_27	chr1_174128551_174958985_RABGAP1L_NM_+	+	chr1:174188312-174188445|mpeak_86
chr1	190443521	190443939	mpeak_92	chr1:190066796_190446759_BRINP3_NM_-	-	chr1	190443657	190443791	mpeak_29	chr1_190068264_190446759_BRINP3_NM_-	-	chr1:190443671-190443789|mpeak_92
chr1	228823024	228823621	mpeak_107	chr1:228780393_228882416_RHOU_NR_+	+	chr1	228823174	228823290	mpeak_77	chr1_228780393_228879031_RHOU_NR_+	+	chr1:228823174-228823471|mpeak_107
chr1	85642597	85643229	mpeak_37	chr1:85623355_85666728_SYDE2_NM_-	-	chr1	85643072	85643423	mpeak_28	chr1_85624932_85666728_SYDE2_NM_-	-	chr1:85642747-85643079|mpeak_37
chr1	85642978	85643650	mpeak_38	chr1:85623355_85666728_SYDE2_NM_-	-	chr1	85643072	85643423	mpeak_28	chr1_85624932_85666728_SYDE2_NM_-	-	chr1:85643128-85643500|mpeak_38
chr1	85643993	85644431	mpeak_39	chr1:85623355_85666728_SYDE2_NM_-	-	chr1	85644143	85644281	mpeak_29	chr1_85624932_85666728_SYDE2_NM_-	-	chr1:85644143-85644281|mpeak_39
chr1	39918279	39918643	mpeak_25	chr1:39549838_39952810_MACF1_NM_+	+	chr1	39918429	39918493	mpeak_24	chr1_39549838_39951209_MACF1_NM_+	+	chr1:39918429-39918493|mpeak_25
chr1	45101807	45102327	mpeak_27	chr1:44870959_45117396_RNF220_NM_+	+	chr1	45101984	45102041	mpeak_29	chr1_44870959_45116375_RNF220_NM_+	+	chr1:45101957-45102177|mpeak_27
chr1	59002029	59002427	mpeak_32	chr1:58946390_59012471_OMA1_NM_-	-	chr1	59002179	59002287	mpeak_38	chr1_58946846_59012471_OMA1_NM_-	-	chr1:59002179-59002277|mpeak_32
chr1	117598900	117599297	mpeak_58	chr1:117568103_117602112_LOC101929099_NR_-	-	chr1	117599050	117599153	mpeak_78	chr1_117569408_117602112_LOC101929099_NR_-	-	chr1:117599050-117599147|mpeak_58
chr1	6931701	6932265	mpeak_6	chr1:6845383_7829766_CAMTA1_NM_+	+	chr1	6931967	6932115	mpeak_2	chr1_6845383_6947713_CAMTA1_NR_+	+	chr1:6931851-6932115|mpeak_6
chr1	148565591	148566020	mpeak_64	chr1:148558187_148596267_NBPF15_NM_+	+	chr1	148565731	148565891	mpeak_81	chr1_148558187_148594396_NBPF15_NM_+	+	chr1:148565741-148565870|mpeak_64
chr1	1327432	1327911	mpeak_1	chr1:1321090_1334718_CCNL2_NM_-	-	chr1	1327659	1327733	mpeak_1	chr1_1322962_1334718_CCNL2_NM_-	-	chr1:1327582-1327761|mpeak_1
chr1	3750385	3750845	mpeak_3	chr1:3728644_3773797_CEP104_NM_-	-	chr1	3750535	3750695	mpeak_2	chr1_3732081_3773797_CEP104_NM_-	-	chr1:3750535-3750695|mpeak_3
chr1	85639797	85640198	mpeak_36	chr1:85623355_85666728_SYDE2_NM_-	-	chr1	85639949	85640048	mpeak_5	chr1_85624932_85666728_SYDE2_NM_-	-	chr1:85639947-85640048|mpeak_36
chr1	85642597	85643229	mpeak_37	chr1:85623355_85666728_SYDE2_NM_-	-	chr1	85642747	85643079	mpeak_6	chr1_85624932_85666728_SYDE2_NM_-	-	chr1:85642747-85643079|mpeak_37
chr1	85642597	85643229	mpeak_37	chr1:85623355_85666728_SYDE2_NM_-	-	chr1	85643131	85643500	mpeak_7	chr1_85624932_85666728_SYDE2_NM_-	-	chr1:85642747-85643079|mpeak_37
chr1	85642978	85643650	mpeak_38	chr1:85623355_85666728_SYDE2_NM_-	-	chr1	85642747	85643079	mpeak_6	chr1_85624932_85666728_SYDE2_NM_-	-	chr1:85643128-85643500|mpeak_38
chr1	85642978	85643650	mpeak_38	chr1:85623355_85666728_SYDE2_NM_-	-	chr1	85643131	85643500	mpeak_7	chr1_85624932_85666728_SYDE2_NM_-	-	chr1:85643128-85643500|mpeak_38
chr1	85643993	85644431	mpeak_39	chr1:85623355_85666728_SYDE2_NM_-	-	chr1	85644148	85644281	mpeak_8	chr1_85624932_85666728_SYDE2_NM_-	-	chr1:85644143-85644281|mpeak_39
chr1	90484093	90484498	mpeak_45	chr1:90460677_90494094_ZNF326_NM_+	+	chr1	90484255	90484349	mpeak_9	chr1_90460677_90492912_ZNF326_NM_+	+	chr1:90484243-90484348|mpeak_45
chr1	173790984	173791363	mpeak_84	chr1:173768687_173793777_CENPL_NM_-	-	chr1	173791159	173791217	mpeak_19	chr1_173769657_173793777_CENPL_NM_-	-	chr1:173791134-173791213|mpeak_84
chr1	211564836	211565197	mpeak_97	chr1:211556096_211605877_LINC00467_NR_+	+	chr1	211564989	211565047	mpeak_21	chr1_211556096_211605660_LINC00467_NR_+	+	chr1:211564986-211565047|mpeak_97
chr1	211571495	211571889	mpeak_98	chr1:211556096_211605877_LINC00467_NR_+	+	chr1	211571639	211571739	mpeak_22	chr1_211556096_211605660_LINC00467_NR_+	+	chr1:211571645-211571739|mpeak_98
chr1	211572289	211572714	mpeak_99	chr1:211556096_211605877_LINC00467_NR_+	+	chr1	211572438	211572508	mpeak_23	chr1_211556096_211605660_LINC00467_NR_+	+	chr1:211572439-211572564|mpeak_99
chr10	63969082	63969432	mpeak_145	chr10:63952844_64028622_RTKN2_NM_-	-	chr10	63969231	63969282	mpeak_56	chr10_63958202_64028622_RTKN2_NM_-	-	chr10:63969232-63969282|mpeak_145
chr10	11601346	11601719	mpeak_118	chr10:11502508_11653788_USP6NL_NM_-	-	chr10	11601496	11601564	mpeak_83	chr10_11505848_11653788_USP6NL_NM_-	-	chr10:11601496-11601569|mpeak_118
chr10	88603387	88603872	mpeak_153	chr10:88516395_88684945_BMPR1A_NM_+	+	chr10	88603537	88603722	mpeak_97	chr10_88516395_88683350_BMPR1A_NM_+	+	chr10:88603537-88603722|mpeak_153
chr10	134540615	134541010	mpeak_175	chr10:134351352_134596984_INPP5A_NM_+	+	chr10	134540767	134540859	mpeak_126	chr10_134351352_134595540_INPP5A_NM_+	+	chr10:134540765-134540860|mpeak_175
chr10	79750657	79751012	mpeak_149	chr10:79734906_79789298_POLR3A_NM_-	-	chr10	79750807	79750862	mpeak_172	chr10_79737384_79789298_POLR3A_NM_-	-	chr10:79750807-79750862|mpeak_149
chr10	128608634	128609065	mpeak_171	chr10:128593977_129250781_DOCK1_NM_+	+	chr10	128608784	128608884	mpeak_216	chr10_128593977_129249595_DOCK1_NM_+	+	chr10:128608784-128608915|mpeak_171
chr10	11542898	11543333	mpeak_117	chr10:11502508_11653788_USP6NL_NM_-	-	chr10	11543048	11543183	mpeak_27	chr10_11505848_11653788_USP6NL_NM_-	-	chr10:11543048-11543183|mpeak_117
chr10	11996748	11997116	mpeak_119	chr10:11962020_12085169_UPF2_NM_-	-	chr10	11996898	11996966	mpeak_28	chr10_11963306_12085169_UPF2_NM_-	-	chr10:11996898-11996966|mpeak_119
chr10	15830674	15831034	mpeak_122	chr10:15820174_15902519_FAM188A_NM_-	-	chr10	15830821	15830884	mpeak_29	chr10_15821140_15902519_FAM188A_NM_-	-	chr10:15830824-15830884|mpeak_122
chr10	27456255	27456901	mpeak_125	chr10:27443752_27475848_MASTL_NM_+	+	chr10	27456810	27456866	mpeak_30	chr10_27443752_27475307_MASTL_NM_+	+	chr10:27456405-27456751|mpeak_125
chr10	27456660	27457016	mpeak_126	chr10:27443752_27475848_MASTL_NM_+	+	chr10	27456810	27456866	mpeak_30	chr10_27443752_27475307_MASTL_NM_+	+	chr10:27456810-27456866|mpeak_126
chr10	32109158	32109549	mpeak_129	chr10:32094325_32217804_ARHGAP12_NM_-	-	chr10	32109308	32109399	mpeak_31	chr10_32096760_32217804_ARHGAP12_NM_-	-	chr10:32109308-32109399|mpeak_129
chr10	43622654	43623150	mpeak_140	chr10:43572516_43625797_RET_NM_+	+	chr10	43622861	43622992	mpeak_33	chr10_43572516_43623559_RET_NM_+	+	chr10:43622804-43623000|mpeak_140
chr10	63662324	63662713	mpeak_143	chr10:63661012_63856707_ARID5B_NM_+	+	chr10	63662474	63662562	mpeak_34	chr10_63661012_63850620_ARID5B_NM_+	+	chr10:63662474-63662563|mpeak_143
chr10	63662524	63662883	mpeak_144	chr10:63661012_63856707_ARID5B_NM_+	+	chr10	63662474	63662562	mpeak_34	chr10_63661012_63850620_ARID5B_NM_+	+	chr10:63662674-63662733|mpeak_144
chr10	93577867	93578246	mpeak_156	chr10:93558150_93625232_TNKS2_NM_+	+	chr10	93578017	93578096	mpeak_35	chr10_93558150_93622693_TNKS2_NM_+	+	chr10:93578017-93578096|mpeak_156
chr10	134540615	134541010	mpeak_175	chr10:134351352_134596984_INPP5A_NM_+	+	chr10	134540765	134540859	mpeak_43	chr10_134351352_134595540_INPP5A_NM_+	+	chr10:134540765-134540860|mpeak_175
chr11	35211585	35211943	mpeak_196	chr11:35160416_35253949_CD44_NM_+	+	chr11	35211735	35211798	mpeak_88	chr11_35160416_35250675_CD44_NM_+	+	chr11:35211735-35211793|mpeak_196
chr11	118962231	118962707	mpeak_235	chr11:118955586_118964259_HMBS_NM_+	+	chr11	118962323	118962444	mpeak_104	chr11_118955586_118963819_HMBS_NM_+	+	chr11:118962381-118962557|mpeak_235
chr11	33162807	33163417	mpeak_188	chr11:33106129_33183037_CSTF3_NM_-	-	chr11	33162953	33163267	mpeak_140	chr11_33106835_33183037_CSTF3_NM_-	-	chr11:33162957-33163267|mpeak_188
chr11	76503642	76503997	mpeak_217	chr11:76493356_76509198_TSKU_NM_+	+	chr11	76503791	76503844	mpeak_164	chr11_76493356_76506652_TSKU_NM_+	+	chr11:76503792-76503847|mpeak_217
chr11	82869576	82870091	mpeak_223	chr11:82868136_82896835_PCF11_NM_+	+	chr11	82869726	82869941	mpeak_166	chr11_82868136_82895720_PCF11_NM_+	+	chr11:82869726-82869941|mpeak_223
chr11	82905293	82905717	mpeak_225	chr11:82904780_82926242_ANKRD42_NR_+	+	chr11	82905463	82905520	mpeak_167	chr11_82904780_82966886_ANKRD42_NM_+	+	chr11:82905443-82905567|mpeak_225
chr11	674035	674572	mpeak_179	chr11:644219_695754_DEAF1_NM_-	-	chr11	674185	674356	mpeak_217	chr11_644654_695754_DEAF1_NM_-	-	chr11:674185-674422|mpeak_179
chr11	75742808	75743172	mpeak_216	chr11:75526211_75855282_UVRAG_NM_+	+	chr11	75743103	75743165	mpeak_247	chr11_75526211_75851754_UVRAG_NM_+	+	chr11:75742958-75743022|mpeak_216
chr11	102950878	102951321	mpeak_226	chr11:102921412_102962944_DCUN1D5_NM_-	-	chr11	102951029	102951167	mpeak_253	chr11_102933143_102962944_DCUN1D5_NM_-	-	chr11:102951028-102951171|mpeak_226
chr11	106695294	106695729	mpeak_227	chr11:106544737_106889171_GUCY1A2_NM_-	-	chr11	106695444	106695579	mpeak_255	chr11_106558482_106889171_GUCY1A2_NM_-	-	chr11:106695444-106695579|mpeak_227
chr11	18370095	18370533	mpeak_186	chr11:18343815_18388590_GTF2H1_NM_+	+	chr11	18370015	18370218	mpeak_45	chr11_18343815_18387329_GTF2H1_NM_+	+	chr11:18370245-18370383|mpeak_186
chr11	18370095	18370533	mpeak_186	chr11:18343815_18388590_GTF2H1_NM_+	+	chr11	18370245	18370383	mpeak_46	chr11_18343815_18387329_GTF2H1_NM_+	+	chr11:18370245-18370383|mpeak_186
chr11	34938170	34938521	mpeak_192	chr11:34937676_35017675_PDHX_NM_+	+	chr11	34938320	34938374	mpeak_47	chr11_34937676_35016460_PDHX_NM_+	+	chr11:34938320-34938371|mpeak_192
chr11	34952795	34953171	mpeak_193	chr11:34937676_35017675_PDHX_NM_+	+	chr11	34952944	34953021	mpeak_48	chr11_34937676_35016460_PDHX_NM_+	+	chr11:34952945-34953021|mpeak_193
chr11	34978774	34979138	mpeak_195	chr11:34937676_35017675_PDHX_NM_+	+	chr11	34978878	34978988	mpeak_49	chr11_34937676_35016460_PDHX_NM_+	+	chr11:34978924-34978988|mpeak_195
chr11	68142669	68143051	mpeak_210	chr11:68080076_68216743_LRP5_NM_+	+	chr11	68142826	68142899	mpeak_51	chr11_68080076_68216276_LRP5_NM_+	+	chr11:68142819-68142901|mpeak_210
chr11	107274814	107275190	mpeak_229	chr11:107197071_107328572_CWF19L2_NM_-	-	chr11	107274969	107275040	mpeak_58	chr11_107197779_107328572_CWF19L2_NM_-	-	chr11:107274964-107275040|mpeak_229
chr12	6427936	6428312	mpeak_243	chr12:6419601_6437672_PLEKHG6_NM_+	+	chr12	6428084	6428156	mpeak_106	chr12_6419601_6437301_PLEKHG6_NM_+	+	chr12:6428086-6428162|mpeak_243
chr12	64891335	64891692	mpeak_266	chr12:64845839_64895899_TBK1_NM_+	+	chr12	64891485	64891542	mpeak_127	chr12_64845839_64895109_TBK1_NM_+	+	chr12:64891485-64891542|mpeak_266
chr12	69115728	69116076	mpeak_271	chr12:69080730_69136473_NUP107_NM_+	+	chr12	69115880	69115926	mpeak_130	chr12_69080730_69136134_NUP107_NM_+	+	chr12:69115878-69115926|mpeak_271
chr12	79997801	79998176	mpeak_274	chr12:79985744_80084790_PAWR_NM_-	-	chr12	79997930	79998011	mpeak_131	chr12_79986473_80084790_PAWR_NM_-	-	chr12:79997951-79998026|mpeak_274
chr12	98909723	98910085	mpeak_277	chr12:98909350_98944157_TMPO_NM_+	+	chr12	98909800	98909934	mpeak_132	chr12_98909350_98941350_TMPO_NM_+	+	chr12:98909873-98909935|mpeak_277
chr12	98925302	98925840	mpeak_278	chr12:98909350_98944157_TMPO_NM_+	+	chr12	98925455	98925624	mpeak_133	chr12_98909350_98941350_TMPO_NM_+	+	chr12:98925452-98925690|mpeak_278
chr12	98929151	98929583	mpeak_279	chr12:98909350_98944157_TMPO_NM_+	+	chr12	98929301	98929433	mpeak_134	chr12_98909350_98941350_TMPO_NM_+	+	chr12:98929301-98929433|mpeak_279
chr12	111159458	111160126	mpeak_285	chr12:111157612_111180783_PPP1CC_NM_-	-	chr12	111159610	111159935	mpeak_137	chr12_111158970_111180783_PPP1CC_NM_-	-	chr12:111159608-111159976|mpeak_285
chr12	80081982	80082334	mpeak_275	chr12:79985744_80084790_PAWR_NM_-	-	chr12	80082130	80082184	mpeak_214	chr12_79986473_80084790_PAWR_NM_-	-	chr12:80082132-80082184|mpeak_275
chr12	83098913	83099342	mpeak_276	chr12:83080933_83528067_TMTC2_NM_+	+	chr12	83099203	83099263	mpeak_216	chr12_83080933_83525988_TMTC2_NM_+	+	chr12:83099063-83099192|mpeak_276
chr12	102295629	102296047	mpeak_281	chr12:102271104_102317401_DRAM1_NM_+	+	chr12	102295779	102295896	mpeak_220	chr12_102271104_102314993_DRAM1_NM_+	+	chr12:102295779-102295897|mpeak_281
chr12	123801684	123802062	mpeak_294	chr12:123773655_123834988_SBNO1_NM_-	-	chr12	123801782	123801912	mpeak_232	chr12_123780597_123834988_SBNO1_NM_-	-	chr12:123801834-123801912|mpeak_294
chr12	2926236	2926586	mpeak_240	chr12:2921786_2934237_ITFG2_NM_+	+	chr12	2926386	2926480	mpeak_271	chr12_2921786_2933255_ITFG2_NM_+	+	chr12:2926386-2926436|mpeak_240
chr12	98909723	98910085	mpeak_277	chr12:98909350_98944157_TMPO_NM_+	+	chr12	98909873	98909935	mpeak_329	chr12_98909350_98941350_TMPO_NM_+	+	chr12:98909873-98909935|mpeak_277
chr12	98925302	98925840	mpeak_278	chr12:98909350_98944157_TMPO_NM_+	+	chr12	98925554	98925690	mpeak_330	chr12_98909350_98941350_TMPO_NM_+	+	chr12:98925452-98925690|mpeak_278
chr12	98929151	98929583	mpeak_279	chr12:98909350_98944157_TMPO_NM_+	+	chr12	98929348	98929432	mpeak_331	chr12_98909350_98941350_TMPO_NM_+	+	chr12:98929301-98929433|mpeak_279
chr12	132419268	132419645	mpeak_302	chr12:132413744_132428406_PUS1_NM_+	+	chr12	132419416	132419491	mpeak_357	chr12_132413744_132428083_PUS1_NM_+	+	chr12:132419418-132419495|mpeak_302
chr12	12351672	12352044	mpeak_246	chr12:12268960_12419811_LRP6_NM_-	-	chr12	12351822	12351889	mpeak_61	chr12_12274354_12419811_LRP6_NM_-	-	chr12:12351822-12351894|mpeak_246
chr12	56307377	56307826	mpeak_260	chr12:56295196_56321697_WIBG_NM_-	-	chr12	56307516	56307668	mpeak_66	chr12_56296139_56321697_WIBG_NM_-	-	chr12:56307527-56307676|mpeak_260
chr12	83098913	83099342	mpeak_276	chr12:83080933_83528067_TMTC2_NM_+	+	chr12	83099063	83099192	mpeak_67	chr12_83080933_83525988_TMTC2_NM_+	+	chr12:83099063-83099192|mpeak_276
chr12	102295629	102296047	mpeak_281	chr12:102271104_102317401_DRAM1_NM_+	+	chr12	102295838	102295897	mpeak_68	chr12_102271104_102314993_DRAM1_NM_+	+	chr12:102295779-102295897|mpeak_281
chr12	110457065	110457415	mpeak_283	chr12:110437234_110477235_ANKRD13A_NM_+	+	chr12	110457215	110457278	mpeak_70	chr12_110437234_110475163_ANKRD13A_NM_+	+	chr12:110457215-110457265|mpeak_283
chr12	112107323	112107777	mpeak_286	chr12:112079949_112123800_BRAP_NM_-	-	chr12	112107473	112107627	mpeak_72	chr12_112082366_112123800_BRAP_NM_-	-	chr12:112107473-112107627|mpeak_286
chr12	112302936	112303285	mpeak_287	chr12:112280031_112331228_MAPKAPK5_NM_+	+	chr12	112303086	112303135	mpeak_73	chr12_112280031_112330770_MAPKAPK5_NM_+	+	chr12:112303086-112303135|mpeak_287
chr12	122248685	122249062	mpeak_289	chr12:122242637_122270562_SETD1B_NM_+	+	chr12	122248849	122248908	mpeak_74	chr12_122242637_122267971_SETD1B_NM_+	+	chr12:122248835-122248912|mpeak_289
chr13	41896470	41896882	mpeak_320	chr13:41885340_41951166_NAA16_NM_+	+	chr13	41896620	41896732	mpeak_245	chr13_41885340_41949540_NAA16_NM_+	+	chr13:41896620-41896732|mpeak_320
chr13	20233201	20233584	mpeak_306	chr13:20207787_20247599_MPHOSPH8_NM_+	+	chr13	20233124	20233220	mpeak_75	chr13_20207787_20245973_MPHOSPH8_NM_+	+	chr13:20233351-20233434|mpeak_306
chr13	21383068	21383464	mpeak_308	chr13:21351467_21476913_XPO4_NM_-	-	chr13	21383218	21383314	mpeak_78	chr13_21358058_21476913_XPO4_NM_-	-	chr13:21383218-21383314|mpeak_308
chr13	27648756	27649197	mpeak_310	chr13:27640286_27746033_USP12_NM_-	-	chr13	27648909	27649047	mpeak_80	chr13_27643521_27746033_USP12_NM_-	-	chr13:27648906-27649047|mpeak_310
chr13	28224188	28224556	mpeak_311	chr13:28194879_28241559_POLR1D_NM_+	+	chr13	28224337	28224406	mpeak_81	chr13_28194879_28239822_POLR1D_NM_+	+	chr13:28224338-28224406|mpeak_311
chr13	28225212	28225662	mpeak_312	chr13:28194879_28241559_POLR1D_NM_+	+	chr13	28225312	28225512	mpeak_82	chr13_28194879_28239822_POLR1D_NM_+	+	chr13:28225362-28225512|mpeak_312
chr13	34073310	34073661	mpeak_316	chr13:33677271_34250972_STARD13_NM_-	-	chr13	34073460	34073511	mpeak_85	chr13_33679847_34250972_STARD13_NM_-	-	chr13:34073460-34073511|mpeak_316
chr13	42619249	42619667	mpeak_323	chr13:42614171_42817033_DGKH_NM_+	+	chr13	42619399	42619528	mpeak_86	chr13_42614171_42803234_DGKH_NM_+	+	chr13:42619399-42619517|mpeak_323
chr13	48657365	48657726	mpeak_327	chr13:48649863_48669277_MED4_NM_-	-	chr13	48657515	48657576	mpeak_88	chr13_48651447_48669277_MED4_NM_-	-	chr13:48657515-48657576|mpeak_327
chr13	79216103	79216473	mpeak_332	chr13:79188420_79233314_RNF219_NM_-	-	chr13	79216249	79216323	mpeak_90	chr13_79191257_79233314_RNF219_NM_-	-	chr13:79216253-79216323|mpeak_332
chr13	94286729	94287079	mpeak_333	chr13:93879077_95060273_GPC6_NM_+	+	chr13	94286879	94286959	mpeak_91	chr13_93879077_95055268_GPC6_NM_+	+	chr13:94286879-94286929|mpeak_333
chr13	100774356	100774715	mpeak_334	chr13:100741268_101182691_PCCA_NM_+	+	chr13	100774506	100774565	mpeak_93	chr13_100741268_101182351_PCCA_NM_+	+	chr13:100774506-100774565|mpeak_334
chr14	58930521	58930948	mpeak_362	chr14:58894102_59015549_KIAA0586_NM_+	+	chr14	58930671	58930895	mpeak_177	chr14_58894102_59014498_KIAA0586_NM_+	+	chr14:58930671-58930798|mpeak_362
chr14	58988149	58988620	mpeak_363	chr14:58894102_59015549_KIAA0586_NM_+	+	chr14	58988235	58988285	mpeak_178	chr14_58894102_59014498_KIAA0586_NM_+	+	chr14:58988299-58988470|mpeak_363
chr14	102231465	102231966	mpeak_389	chr14:102228134_102394328_PPP2R5C_NM_+	+	chr14	102231619	102231813	mpeak_191	chr14_102228134_102391477_PPP2R5C_NM_+	+	chr14:102231615-102231816|mpeak_389
chr14	23754153	23754514	mpeak_342	chr14:23742843_23755309_HOMEZ_NM_-	-	chr14	23754304	23754364	mpeak_277	chr14_23746396_23755309_HOMEZ_NM_-	-	chr14:23754303-23754364|mpeak_342
chr14	68226216	68226574	mpeak_364	chr14:68213236_68283306_ZFYVE26_NM_-	-	chr14	68226368	68226424	mpeak_299	chr14_68215356_68283306_ZFYVE26_NM_-	-	chr14:68226366-68226424|mpeak_364
chr14	103090336	103090686	mpeak_395	chr14:103058995_103196913_RCOR1_NM_+	+	chr14	103090486	103090536	mpeak_316	chr14_103058995_103192804_RCOR1_NM_+	+	chr14:103090486-103090536|mpeak_395
chr14	104211671	104212024	mpeak_401	chr14:104200087_104313927_PPP1R13B_NM_-	-	chr14	104211824	104211874	mpeak_322	chr14_104201532_104313927_PPP1R13B_NM_-	-	chr14:104211821-104211874|mpeak_401
chr14	51221308	51221744	mpeak_352	chr14:51186480_51297839_NIN_NM_-	-	chr14	51221458	51221594	mpeak_396	chr14_51190390_51297839_NIN_NM_-	-	chr14:51221458-51221594|mpeak_352
chr14	58930521	58930948	mpeak_362	chr14:58894102_59015549_KIAA0586_NM_+	+	chr14	58930671	58930732	mpeak_400	chr14_58894102_59014498_KIAA0586_NM_+	+	chr14:58930671-58930798|mpeak_362
chr14	58930521	58930948	mpeak_362	chr14:58894102_59015549_KIAA0586_NM_+	+	chr14	58930842	58930907	mpeak_401	chr14_58894102_59014498_KIAA0586_NM_+	+	chr14:58930671-58930798|mpeak_362
chr14	73833442	73833833	mpeak_372	chr14:73741917_73925286_NUMB_NM_-	-	chr14	73833592	73833683	mpeak_413	chr14_73744001_73925286_NUMB_NM_-	-	chr14:73833592-73833683|mpeak_372
chr14	74580749	74581140	mpeak_374	chr14:74551655_74667117_LIN52_NM_+	+	chr14	74580884	74580990	mpeak_415	chr14_74551655_74665624_LIN52_NM_+	+	chr14:74580899-74580990|mpeak_374
chr14	23754153	23754514	mpeak_342	chr14:23742843_23755309_HOMEZ_NM_-	-	chr14	23754304	23754361	mpeak_95	chr14_23746396_23755309_HOMEZ_NM_-	-	chr14:23754303-23754364|mpeak_342
chr14	55765607	55766109	mpeak_358	chr14:55738020_55820329_FBXO34_NM_+	+	chr14	55765758	55765959	mpeak_102	chr14_55738020_55817098_FBXO34_NM_+	+	chr14:55765757-55765959|mpeak_358
chr14	75592885	75593253	mpeak_376	chr14:75548817_75593778_NEK9_NM_-	-	chr14	75593035	75593103	mpeak_105	chr14_75551389_75593778_NEK9_NM_-	-	chr14:75593035-75593103|mpeak_376
chr14	76230834	76231271	mpeak_379	chr14:76127550_76421425_TTLL5_NM_+	+	chr14	76230984	76231121	mpeak_106	chr14_76127550_76420766_TTLL5_NM_+	+	chr14:76230984-76231121|mpeak_379
chr14	89670156	89670507	mpeak_383	chr14:89622515_90085494_FOXN3_NM_-	-	chr14	89670306	89670357	mpeak_107	chr14_89629313_90085494_FOXN3_NM_-	-	chr14:89670306-89670357|mpeak_383
chr14	104211671	104212024	mpeak_401	chr14:104200087_104313927_PPP1R13B_NM_-	-	chr14	104211821	104211874	mpeak_111	chr14_104201532_104313927_PPP1R13B_NM_-	-	chr14:104211821-104211874|mpeak_401
chr15	44116529	44116900	mpeak_412	chr15:44096732_44116951_MFAP1_NM_-	-	chr15	44116680	44116746	mpeak_196	chr15_44097474_44116951_MFAP1_NM_-	-	chr15:44116679-44116750|mpeak_412
chr15	32928177	32928538	mpeak_405	chr15:32907344_32932150_ARHGAP11A_NM_+	+	chr15	32928331	32928387	mpeak_327	chr15_32907344_32928457_ARHGAP11A_NM_+	+	chr15:32928327-32928388|mpeak_405
chr15	75804883	75805252	mpeak_431	chr15:75759461_75871632_PTPN9_NM_-	-	chr15	75805032	75805102	mpeak_356	chr15_75761324_75871632_PTPN9_NM_-	-	chr15:75805033-75805102|mpeak_431
chr15	32928177	32928538	mpeak_405	chr15:32907344_32932150_ARHGAP11A_NM_+	+	chr15	32928329	32928388	mpeak_112	chr15_32907344_32928457_ARHGAP11A_NM_+	+	chr15:32928327-32928388|mpeak_405
chr15	45893117	45893615	mpeak_414	chr15:45879416_45901909_BLOC1S6_NM_+	+	chr15	45893599	45893677	mpeak_113	chr15_45879416_45898592_BLOC1S6_NM_+	+	chr15:45893267-45893465|mpeak_414
chr15	45893356	45893824	mpeak_415	chr15:45879416_45901909_BLOC1S6_NM_+	+	chr15	45893599	45893677	mpeak_113	chr15_45879416_45898592_BLOC1S6_NM_+	+	chr15:45893506-45893674|mpeak_415
chr15	57022824	57023186	mpeak_419	chr15:56922373_57026284_ZNF280D_NM_-	-	chr15	57022975	57023079	mpeak_117	chr15_56924320_57026284_ZNF280D_NM_-	-	chr15:57022974-57023036|mpeak_419
chr15	66786002	66786446	mpeak_425	chr15:66782665_66790146_SNAPC5_NM_-	-	chr15	66786365	66786722	mpeak_121	chr15_66783055_66790146_SNAPC5_NM_-	-	chr15:66786152-66786296|mpeak_425
chr15	66786181	66787049	mpeak_426	chr15:66782665_66790146_SNAPC5_NM_-	-	chr15	66786365	66786722	mpeak_121	chr15_66783055_66790146_SNAPC5_NM_-	-	chr15:66786331-66786899|mpeak_426
chr16	85113146	85113603	mpeak_495	chr16:85061356_85127828_KIAA0513_NM_+	+	chr16	85113296	85113449	mpeak_234	chr16_85061356_85121881_KIAA0513_NM_+	+	chr16:85113296-85113453|mpeak_495
chr16	3498435	3498817	mpeak_452	chr16:3493667_3536963_NAA60_NM_+	+	chr16	3498582	3498665	mpeak_379	chr16_3493667_3535466_NAA60_NM_+	+	chr16:3498585-3498667|mpeak_452
chr16	9203941	9204385	mpeak_459	chr16:9185536_9213555_C16orf72_NM_+	+	chr16	9204088	9204196	mpeak_382	chr16_9185536_9210524_C16orf72_NM_+	+	chr16:9204091-9204235|mpeak_459
chr16	53172164	53172526	mpeak_477	chr16:53088944_53361414_CHD9_NM_+	+	chr16	53172314	53172376	mpeak_400	chr16_53088944_53357931_CHD9_NM_+	+	chr16:53172314-53172376|mpeak_477
chr16	89452377	89452895	mpeak_504	chr16:89353065_89556969_ANKRD11_NR_-	-	chr16	89452527	89452745	mpeak_414	chr16_89353521_89556969_ANKRD11_NR_-	-	chr16:89452527-89452745|mpeak_504
chr16	84522638	84522990	mpeak_493	chr16:84509965_84538288_TLDC1_NM_-	-	chr16	84522785	84522840	mpeak_514	chr16_84513632_84538288_TLDC1_NM_-	-	chr16:84522788-84522840|mpeak_493
chr16	85113146	85113603	mpeak_495	chr16:85061356_85127828_KIAA0513_NM_+	+	chr16	85113297	85113443	mpeak_515	chr16_85061356_85121881_KIAA0513_NM_+	+	chr16:85113296-85113453|mpeak_495
chr16	493839	494198	mpeak_446	chr16:475667_572481_RAB11FIP3_NM_+	+	chr16	493989	494055	mpeak_126	chr16_475667_570725_RAB11FIP3_NM_+	+	chr16:493989-494048|mpeak_446
chr16	1462475	1462895	mpeak_449	chr16:1413205_1464721_UNKL_NM_-	-	chr16	1462625	1462734	mpeak_128	chr16_1416396_1464721_UNKL_NM_-	-	chr16:1462625-1462745|mpeak_449
chr16	9200410	9200848	mpeak_458	chr16:9185536_9213555_C16orf72_NM_+	+	chr16	9200560	9200704	mpeak_132	chr16_9185536_9210524_C16orf72_NM_+	+	chr16:9200560-9200698|mpeak_458
chr16	9205543	9205983	mpeak_460	chr16:9185536_9213555_C16orf72_NM_+	+	chr16	9205860	9205996	mpeak_133	chr16_9185536_9210524_C16orf72_NM_+	+	chr16:9205693-9205833|mpeak_460
chr16	9205710	9206146	mpeak_461	chr16:9185536_9213555_C16orf72_NM_+	+	chr16	9205860	9205996	mpeak_133	chr16_9185536_9210524_C16orf72_NM_+	+	chr16:9205860-9205996|mpeak_461
chr16	11889909	11890303	mpeak_464	chr16:11844441_11891114_ZC3H7A_NM_-	-	chr16	11890059	11890153	mpeak_134	chr16_11845362_11891114_ZC3H7A_NM_-	-	chr16:11890059-11890153|mpeak_464
chr16	27650760	27651110	mpeak_474	chr16:27561467_27791692_KIAA0556_NM_+	+	chr16	27650910	27650962	mpeak_136	chr16_27561467_27789894_KIAA0556_NM_+	+	chr16:27650910-27650960|mpeak_474
chr16	46858143	46858498	mpeak_476	chr16:46835958_46865074_C16orf87_NM_-	-	chr16	46858290	46858397	mpeak_140	chr16_46836982_46865074_C16orf87_NM_-	-	chr16:46858293-46858348|mpeak_476
chr16	67943791	67944147	mpeak_481	chr16:67927174_67963581_PSKH1_NM_+	+	chr16	67943940	67943997	mpeak_141	chr16_67927174_67961227_PSKH1_NM_+	+	chr16:67943941-67943997|mpeak_481
chr16	69403482	69403889	mpeak_482	chr16:69389463_69419891_TERF2_NM_-	-	chr16	69403640	69403739	mpeak_142	chr16_69390959_69419891_TERF2_NM_-	-	chr16:69403632-69403739|mpeak_482
chr16	74695826	74696262	mpeak_489	chr16:74655296_74700779_RFWD3_NM_-	-	chr16	74695976	74696112	mpeak_143	chr16_74657969_74700779_RFWD3_NM_-	-	chr16:74695976-74696112|mpeak_489
chr16	89452377	89452895	mpeak_504	chr16:89353065_89556969_ANKRD11_NR_-	-	chr16	89452568	89452618	mpeak_150	chr16_89353521_89556969_ANKRD11_NR_-	-	chr16:89452527-89452745|mpeak_504
chr16	89588424	89588779	mpeak_508	chr16:89574795_89624176_SPG7_NM_+	+	chr16	89588574	89588629	mpeak_151	chr16_89574795_89623294_SPG7_NM_+	+	chr16:89588574-89588629|mpeak_508
chr17	6553397	6553857	mpeak_524	chr17:6546632_6554954_MED31_NM_-	-	chr17	6553449	6553691	mpeak_238	chr17_6547979_6554954_MED31_NM_-	-	chr17:6553547-6553707|mpeak_524
chr17	8409521	8409969	mpeak_527	chr17:8377522_8534079_MYH10_NM_-	-	chr17	8409884	8409941	mpeak_240	chr17_8379266_8534079_MYH10_NM_-	-	chr17:8409671-8409819|mpeak_527
chr17	76029172	76029576	mpeak_585	chr17:76000317_76104916_TNRC6C_NM_+	+	chr17	76029322	76029423	mpeak_261	chr17_76000317_76100565_TNRC6C_NM_+	+	chr17:76029322-76029426|mpeak_585
chr17	79224518	79224884	mpeak_589	chr17:79218610_79269139_SLC38A10_NM_-	-	chr17	79224663	79224736	mpeak_264	chr17_79220473_79269139_SLC38A10_NM_-	-	chr17:79224668-79224734|mpeak_589
chr17	9086786	9087148	mpeak_528	chr17:8924858_9147317_NTN1_NM_+	+	chr17	9086940	9086990	mpeak_427	chr17_8924858_9142956_NTN1_NM_+	+	chr17:9086936-9086998|mpeak_528
chr17	55351629	55352041	mpeak_564	chr17:55333930_55757299_MSI2_NM_+	+	chr17	55351779	55351857	mpeak_448	chr17_55333930_55756909_MSI2_NM_+	+	chr17:55351779-55351891|mpeak_564
chr17	55351629	55352041	mpeak_564	chr17:55333930_55757299_MSI2_NM_+	+	chr17	55351955	55352025	mpeak_449	chr17_55333930_55756909_MSI2_NM_+	+	chr17:55351779-55351891|mpeak_564
chr17	19219844	19220320	mpeak_538	chr17:19140689_19240028_EPN2_NM_+	+	chr17	19220115	19220172	mpeak_546	chr17_19140689_19237268_EPN2_NM_+	+	chr17:19219994-19220170|mpeak_538
chr17	59806112	59806472	mpeak_569	chr17:59756546_59940920_BRIP1_NM_-	-	chr17	59806267	59806326	mpeak_591	chr17_59761501_59940920_BRIP1_NM_-	-	chr17:59806262-59806322|mpeak_569
chr17	79223709	79224194	mpeak_588	chr17:79218610_79269139_SLC38A10_NM_-	-	chr17	79223855	79224044	mpeak_611	chr17_79220473_79269139_SLC38A10_NM_-	-	chr17:79223859-79224044|mpeak_588
chr17	2295567	2296008	mpeak_521	chr17:2287353_2304258_MNT_NM_-	-	chr17	2295717	2295858	mpeak_154	chr17_2290943_2304258_MNT_NM_-	-	chr17:2295717-2295858|mpeak_521
chr17	8396891	8397239	mpeak_526	chr17:8377522_8534079_MYH10_NM_-	-	chr17	8397041	8397089	mpeak_157	chr17_8379266_8534079_MYH10_NM_-	-	chr17:8397041-8397089|mpeak_526
chr17	73793050	73793405	mpeak_583	chr17:73780919_73821886_UNK_NM_+	+	chr17	73793200	73793251	mpeak_165	chr17_73780919_73820342_UNK_NM_+	+	chr17:73793200-73793255|mpeak_583
chr17	74413338	74413694	mpeak_584	chr17:74385612_74449288_UBE2O_NM_-	-	chr17	74413488	74413544	mpeak_166	chr17_74387694_74449288_UBE2O_NM_-	-	chr17:74413488-74413544|mpeak_584
chr18	9221693	9222152	mpeak_597	chr18:9136750_9285983_ANKRD12_NM_+	+	chr18	9221844	9222002	mpeak_266	chr18_9136750_9280938_ANKRD12_NM_+	+	chr18:9221843-9222002|mpeak_597
chr18	55335502	55335868	mpeak_607	chr18:55313658_55470327_ATP8B1_NM_-	-	chr18	55335652	55335722	mpeak_633	chr18_55315944_55470327_ATP8B1_NM_-	-	chr18:55335652-55335718|mpeak_607
chr18	2582644	2583016	mpeak_594	chr18:2571509_2616634_NDC80_NM_+	+	chr18	2582794	2582855	mpeak_170	chr18_2571509_2616435_NDC80_NM_+	+	chr18:2582794-2582866|mpeak_594
chr18	8718266	8718718	mpeak_595	chr18:8717368_8832775_MTCL1_NM_+	+	chr18	8718417	8718568	mpeak_171	chr18_8717368_8831604_MTCL1_NM_+	+	chr18:8718416-8718568|mpeak_595
chr18	29991689	29992044	mpeak_601	chr18:29843483_30050447_GAREM_NM_-	-	chr18	29991839	29991891	mpeak_173	chr18_29848731_30050447_GAREM_NM_-	-	chr18:29991839-29991894|mpeak_601
chr18	29992022	29992389	mpeak_602	chr18:29843483_30050447_GAREM_NM_-	-	chr18	29992148	29992241	mpeak_174	chr18_29848731_30050447_GAREM_NM_-	-	chr18:29992172-29992239|mpeak_602
chr18	29992558	29993127	mpeak_603	chr18:29843483_30050447_GAREM_NM_-	-	chr18	29992607	29993044	mpeak_175	chr18_29848731_30050447_GAREM_NM_-	-	chr18:29992708-29992977|mpeak_603
chr18	77794731	77795212	mpeak_610	chr18:77794345_77810652_RBFA_NM_+	+	chr18	77794881	77795062	mpeak_178	chr18_77794345_77805773_RBFA_NM_+	+	chr18:77794881-77795062|mpeak_610
chr19	337067	337469	mpeak_612	chr19:305574_344791_MIER2_NM_-	-	chr19	337234	337300	mpeak_276	chr19_306711_344791_MIER2_NM_-	-	chr19:337217-337319|mpeak_612
chr19	5118990	5119343	mpeak_616	chr19:4969123_5153608_KDM4B_NM_+	+	chr19	5119141	5119191	mpeak_278	chr19_4969123_5151345_KDM4B_NM_+	+	chr19:5119140-5119193|mpeak_616
chr19	11349822	11350175	mpeak_623	chr19:11309968_11373168_DOCK6_NM_-	-	chr19	11349971	11350025	mpeak_282	chr19_11310215_11373168_DOCK6_NM_-	-	chr19:11349972-11350025|mpeak_623
chr19	23452532	23452897	mpeak_646	chr19:23437855_23457053_IPO5P1_NR_-	-	chr19	23452683	23452747	mpeak_285	chr19_23442918_23457053_IPO5P1_NR_-	-	chr19:23452682-23452747|mpeak_646
chr19	16967697	16968069	mpeak_633	chr19:16940197_16991164_SIN3B_NM_+	+	chr19	16967857	16967919	mpeak_505	chr19_16940197_16989307_SIN3B_NM_+	+	chr19:16967847-16967919|mpeak_633
chr19	20043519	20043902	mpeak_636	chr19:20011721_20046382_ZNF93_NM_+	+	chr19	20043684	20043750	mpeak_507	chr19_20011721_20043990_ZNF93_NM_+	+	chr19:20043669-20043752|mpeak_636
chr19	21336238	21336613	mpeak_640	chr19:21324839_21368805_ZNF431_NM_+	+	chr19	21336389	21336463	mpeak_509	chr19_21324839_21365425_ZNF431_NM_+	+	chr19:21336388-21336463|mpeak_640
chr19	21702323	21702681	mpeak_642	chr19:21688436_21721079_ZNF429_NM_+	+	chr19	21702473	21702530	mpeak_511	chr19_21688436_21719081_ZNF429_NM_+	+	chr19:21702473-21702531|mpeak_642
chr19	5957786	5958149	mpeak_619	chr19:5916150_5978320_RANBP3_NM_-	-	chr19	5957936	5957999	mpeak_643	chr19_5917664_5978320_RANBP3_NM_-	-	chr19:5957936-5957999|mpeak_619
chr19	34243416	34243788	mpeak_657	chr19:34112860_34264414_CHST8_NM_+	+	chr19	34243566	34243717	mpeak_652	chr19_34112860_34262861_CHST8_NM_+	+	chr19:34243566-34243638|mpeak_657
chr19	53121896	53122272	mpeak_685	chr19:53115617_53193834_ZNF83_NM_-	-	chr19	53122042	53122146	mpeak_659	chr19_53118050_53193834_ZNF83_NM_-	-	chr19:53122046-53122122|mpeak_685
chr19	3647782	3648238	mpeak_615	chr19:3630178_3700490_PIP5K1C_NM_-	-	chr19	3647932	3648088	mpeak_180	chr19_3633167_3700490_PIP5K1C_NM_-	-	chr19:3647932-3648088|mpeak_615
chr19	16942681	16943031	mpeak_629	chr19:16940197_16991164_SIN3B_NM_+	+	chr19	16942831	16942892	mpeak_185	chr19_16940197_16989307_SIN3B_NM_+	+	chr19:16942831-16942881|mpeak_629
chr19	16967697	16968069	mpeak_633	chr19:16940197_16991164_SIN3B_NM_+	+	chr19	16967857	16967917	mpeak_186	chr19_16940197_16989307_SIN3B_NM_+	+	chr19:16967847-16967919|mpeak_633
chr19	16968213	16968570	mpeak_634	chr19:16940197_16991164_SIN3B_NM_+	+	chr19	16968362	16968421	mpeak_187	chr19_16940197_16989307_SIN3B_NM_+	+	chr19:16968363-16968420|mpeak_634
chr19	21274355	21274730	mpeak_639	chr19:21264952_21307883_ZNF714_NM_+	+	chr19	21274505	21274580	mpeak_188	chr19_21264952_21307763_ZNF714_NR_+	+	chr19:21274505-21274580|mpeak_639
chr19	53157534	53157894	mpeak_686	chr19:53115617_53193834_ZNF83_NM_-	-	chr19	53157458	53157586	mpeak_193	chr19_53118050_53193834_ZNF83_NM_-	-	chr19:53157684-53157744|mpeak_686
chr19	57705987	57706488	mpeak_692	chr19:57702867_57734214_ZNF264_NM_+	+	chr19	57706167	57706330	mpeak_194	chr19_57702867_57722721_ZNF264_NM_+	+	chr19:57706137-57706338|mpeak_692
chr2	55479720	55480090	mpeak_716	chr2:55463755_55496384_MTIF2_NM_-	-	chr2	55479882	55479939	mpeak_304	chr2_55463956_55496384_MTIF2_NM_-	-	chr2:55479870-55479940|mpeak_716
chr2	99437514	99437865	mpeak_728	chr2:99410308_99552684_KIAA1211L_NM_-	-	chr2	99437664	99437715	mpeak_576	chr2_99411134_99552684_KIAA1211L_NM_-	-	chr2:99437664-99437715|mpeak_728
chr2	149502119	149502473	mpeak_740	chr2:149402559_149545136_EPC2_NM_+	+	chr2	149502269	149502323	mpeak_590	chr2_149402559_149543873_EPC2_NM_+	+	chr2:149502269-149502323|mpeak_740
chr2	240321389	240321739	mpeak_772	chr2:239969863_240322643_HDAC4_NM_-	-	chr2	240321539	240321589	mpeak_630	chr2_239974832_240322643_HDAC4_NM_-	-	chr2:240321539-240321589|mpeak_772
chr2	202006012	202006480	mpeak_758	chr2:201980826_202037411_CFLAR_NM_+	+	chr2	202006162	202006341	mpeak_735	chr2_201980826_202027718_CFLAR_NM_+	+	chr2:202006162-202006330|mpeak_758
chr2	9349904	9350254	mpeak_696	chr2:9346893_9545812_ASAP2_NM_+	+	chr2	9350054	9350104	mpeak_195	chr2_9346893_9543381_ASAP2_NM_+	+	chr2:9350054-9350104|mpeak_696
chr2	48123931	48124372	mpeak_715	chr2:48034058_48132932_FBXO11_NM_-	-	chr2	48124081	48124222	mpeak_201	chr2_48035386_48132932_FBXO11_NM_-	-	chr2:48124081-48124222|mpeak_715
chr2	159948108	159948467	mpeak_741	chr2:159825145_160089170_TANC1_NM_+	+	chr2	159948258	159948314	mpeak_212	chr2_159825145_160086088_TANC1_NM_+	+	chr2:159948258-159948317|mpeak_741
chr2	171927609	171927963	mpeak_749	chr2:171847332_172087824_TLK1_NM_-	-	chr2	171927759	171927813	mpeak_215	chr2_171850466_172087824_TLK1_NM_-	-	chr2:171927759-171927813|mpeak_749
chr2	201756256	201756633	mpeak_756	chr2:201754049_201768655_NIF3L1_NM_+	+	chr2	201756406	201756483	mpeak_218	chr2_201754049_201768216_NIF3L1_NM_+	+	chr2:201756406-201756483|mpeak_756
chr20	13564841	13565197	mpeak_780	chr20:13370035_13619583_TASP1_NM_-	-	chr20	13564990	13565041	mpeak_639	chr20_13371099_13619583_TASP1_NM_-	-	chr20:13564991-13565047|mpeak_780
chr20	61559822	61560237	mpeak_799	chr20:61509089_61569304_DIDO1_NM_-	-	chr20	61559970	61560087	mpeak_659	chr20_61513766_61569304_DIDO1_NM_-	-	chr20:61559972-61560087|mpeak_799
chr20	31973178	31973532	mpeak_785	chr20:31946644_31989375_CDK5RAP1_NM_-	-	chr20	31973328	31973396	mpeak_764	chr20_31946929_31989375_CDK5RAP1_NM_-	-	chr20:31973328-31973382|mpeak_785
chr20	43127164	43128213	mpeak_787	chr20:43124863_43150726_SERINC3_NM_-	-	chr20	43127308	43128394	mpeak_224	chr20_43124996_43150726_SERINC3_NM_-	-	chr20:43127314-43128063|mpeak_787
chr20	44482222	44482710	mpeak_790	chr20:44470359_44486048_ACOT8_NM_-	-	chr20	44482372	44482560	mpeak_226	chr20_44470595_44486048_ACOT8_NM_-	-	chr20:44482372-44482560|mpeak_790
chr21	34896162	34896580	mpeak_802	chr21:34876237_34915198_GART_NM_-	-	chr21	34896312	34896430	mpeak_665	chr21_34876622_34915198_GART_NM_-	-	chr21:34896312-34896430|mpeak_802
chr21	40668199	40668614	mpeak_810	chr21:40557403_40685712_BRWD1_NM_-	-	chr21	40668324	40668528	mpeak_669	chr21_40569341_40685712_BRWD1_NM_-	-	chr21:40668349-40668464|mpeak_810
chr21	45460806	45461185	mpeak_816	chr21:45432205_45526432_TRAPPC10_NM_+	+	chr21	45460976	45461030	mpeak_671	chr21_45432205_45523173_TRAPPC10_NM_+	+	chr21:45460956-45461035|mpeak_816
chr21	40668199	40668614	mpeak_810	chr21:40557403_40685712_BRWD1_NM_-	-	chr21	40668306	40668466	mpeak_230	chr21_40569341_40685712_BRWD1_NM_-	-	chr21:40668349-40668464|mpeak_810
chr21	43428700	43429051	mpeak_815	chr21:43406939_43430496_ZBTB21_NM_-	-	chr21	43428850	43428901	mpeak_231	chr21_43414217_43430496_ZBTB21_NM_-	-	chr21:43428850-43428901|mpeak_815
chr21	45462251	45462609	mpeak_817	chr21:45432205_45526432_TRAPPC10_NM_+	+	chr21	45462402	45462459	mpeak_232	chr21_45432205_45523173_TRAPPC10_NM_+	+	chr21:45462401-45462459|mpeak_817
chr22	46722472	46722825	mpeak_839	chr22:46692637_46726707_GTSE1_NM_+	+	chr22	46722614	46722674	mpeak_360	chr22_46692637_46725943_GTSE1_NM_+	+	chr22:46722622-46722675|mpeak_839
chr22	29447228	29447593	mpeak_830	chr22:29279754_29453476_ZNRF3_NM_+	+	chr22	29447378	29447442	mpeak_681	chr22_29279754_29449566_ZNRF3_NM_+	+	chr22:29447378-29447443|mpeak_830
chr22	31335487	31335849	mpeak_831	chr22:31322597_31364483_MORC2_NM_-	-	chr22	31335637	31335699	mpeak_808	chr22_31322858_31364483_MORC2_NM_-	-	chr22:31335637-31335699|mpeak_831
chr22	34094986	34095341	mpeak_835	chr22:33669061_34316416_LARGE_NM_-	-	chr22	34094806	34094988	mpeak_811	chr22_33670610_34316416_LARGE_NM_-	-	chr22:34095136-34095191|mpeak_835
chr22	46722472	46722825	mpeak_839	chr22:46692637_46726707_GTSE1_NM_+	+	chr22	46722615	46722674	mpeak_820	chr22_46692637_46725943_GTSE1_NM_+	+	chr22:46722622-46722675|mpeak_839
chr22	19893354	19893712	mpeak_825	chr22:19863040_19929515_TXNRD2_NM_-	-	chr22	19893504	19893564	mpeak_233	chr22_19863330_19929515_TXNRD2_NM_-	-	chr22:19893504-19893562|mpeak_825
chr22	31736507	31736868	mpeak_832	chr22:31721789_31742249_PATZ1_NM_-	-	chr22	31736659	31736718	mpeak_235	chr22_31723295_31742249_PATZ1_NM_-	-	chr22:31736657-31736718|mpeak_832
chr22	34094986	34095341	mpeak_835	chr22:33669061_34316416_LARGE_NM_-	-	chr22	34095136	34095191	mpeak_236	chr22_33670610_34316416_LARGE_NM_-	-	chr22:34095136-34095191|mpeak_835
chr22	46786274	46786630	mpeak_840	chr22:46756730_46933067_CELSR1_NM_-	-	chr22	46786424	46786476	mpeak_238	chr22_46759084_46933067_CELSR1_NM_-	-	chr22:46786424-46786480|mpeak_840
chr22	46892675	46893036	mpeak_841	chr22:46756730_46933067_CELSR1_NM_-	-	chr22	46892821	46892888	mpeak_239	chr22_46759084_46933067_CELSR1_NM_-	-	chr22:46892825-46892886|mpeak_841
chr22	50247992	50248416	mpeak_842	chr22:50247496_50283726_ZBED4_NM_+	+	chr22	50248142	50248266	mpeak_240	chr22_50247496_50276981_ZBED4_NM_+	+	chr22:50248142-50248266|mpeak_842
chr3	63891309	63891737	mpeak_879	chr3:63850232_63989136_ATXN7_NM_+	+	chr3	63891459	63891581	mpeak_375	chr3_63850232_63985125_ATXN7_NM_+	+	chr3:63891459-63891587|mpeak_879
chr3	157841496	157841930	mpeak_902	chr3:157827840_158262624_RSRC1_NM_+	+	chr3	157841644	157841774	mpeak_394	chr3_157827840_158261971_RSRC1_NM_+	+	chr3:157841646-157841780|mpeak_902
chr3	169861302	169861738	mpeak_906	chr3:169805367_169899537_PHC3_NM_-	-	chr3	169861452	169861534	mpeak_402	chr3_169815172_169899537_PHC3_NM_-	-	chr3:169861452-169861588|mpeak_906
chr3	196120266	196120621	mpeak_921	chr3:196080368_196159345_UBXN7_NM_-	-	chr3	196120416	196120471	mpeak_407	chr3_196083717_196159345_UBXN7_NM_-	-	chr3:196120416-196120471|mpeak_921
chr3	3213681	3214140	mpeak_845	chr3:3191316_3221401_CRBN_NM_-	-	chr3	3213831	3213932	mpeak_688	chr3_3192729_3221401_CRBN_NM_-	-	chr3:3213831-3213990|mpeak_845
chr3	15011657	15012015	mpeak_857	chr3:14989090_15090786_NR2C2_NM_+	+	chr3	15011808	15011866	mpeak_828	chr3_14989090_15084340_NR2C2_NM_+	+	chr3:15011807-15011865|mpeak_857
chr3	25818181	25818535	mpeak_859	chr3:25760434_25831530_NGLY1_NM_-	-	chr3	25818329	25818385	mpeak_832	chr3_25761126_25831530_NGLY1_NM_-	-	chr3:25818331-25818385|mpeak_859
chr3	63894188	63894635	mpeak_880	chr3:63850232_63989136_ATXN7_NM_+	+	chr3	63894329	63894485	mpeak_853	chr3_63850232_63985125_ATXN7_NM_+	+	chr3:63894338-63894485|mpeak_880
chr3	136323017	136323473	mpeak_897	chr3:136055998_136471245_STAG1_NM_-	-	chr3	136323148	136323266	mpeak_896	chr3_136057119_136471245_STAG1_NM_-	-	chr3:136323167-136323323|mpeak_897
chr3	169861302	169861738	mpeak_906	chr3:169805367_169899537_PHC3_NM_-	-	chr3	169861452	169861534	mpeak_915	chr3_169815172_169899537_PHC3_NM_-	-	chr3:169861452-169861588|mpeak_906
chr3	194305045	194305616	mpeak_914	chr3:194304996_194311561_TMEM44-AS1_NR_+	+	chr3	194305330	194305468	mpeak_923	chr3_194304996_194310583_TMEM44-AS1_NR_+	+	chr3:194305195-194305466|mpeak_914
chr3	3213681	3214140	mpeak_845	chr3:3191316_3221401_CRBN_NM_-	-	chr3	3213841	3213991	mpeak_242	chr3_3192729_3221401_CRBN_NM_-	-	chr3:3213831-3213990|mpeak_845
chr3	5023092	5023449	mpeak_847	chr3:5021096_5026865_BHLHE40_NM_+	+	chr3	5023245	5023299	mpeak_244	chr3_5021096_5024520_BHLHE40_NM_+	+	chr3:5023242-5023299|mpeak_847
chr3	47328630	47329104	mpeak_872	chr3:47324329_47388306_KLHL18_NM_+	+	chr3	47328778	47328956	mpeak_249	chr3_47324329_47385044_KLHL18_NM_+	+	chr3:47328780-47328954|mpeak_872
chr3	63897652	63898013	mpeak_881	chr3:63850232_63989136_ATXN7_NM_+	+	chr3	63897802	63897863	mpeak_251	chr3_63850232_63985125_ATXN7_NM_+	+	chr3:63897802-63897863|mpeak_881
chr3	107493406	107493838	mpeak_891	chr3:107241782_107530176_BBX_NM_+	+	chr3	107493556	107493688	mpeak_253	chr3_107241782_107524216_BBX_NM_+	+	chr3:107493556-107493688|mpeak_891
chr3	119623465	119623816	mpeak_893	chr3:119540801_119813264_GSK3B_NM_-	-	chr3	119623608	119623666	mpeak_255	chr3_119545702_119813264_GSK3B_NM_-	-	chr3:119623615-119623666|mpeak_893
chr3	119720737	119721201	mpeak_894	chr3:119540801_119813264_GSK3B_NM_-	-	chr3	119720889	119721051	mpeak_256	chr3_119545702_119813264_GSK3B_NM_-	-	chr3:119720887-119721051|mpeak_894
chr3	195009689	195010041	mpeak_915	chr3:194995464_195163817_ACAP2_NM_-	-	chr3	195009839	195009891	mpeak_261	chr3_195000157_195163817_ACAP2_NM_-	-	chr3:195009839-195009891|mpeak_915
chr4	95921452	95921832	mpeak_944	chr4:95679127_96079601_BMPR1B_NM_+	+	chr4	95921600	95921682	mpeak_420	chr4_95679127_96075698_BMPR1B_NM_+	+	chr4:95921602-95921682|mpeak_944
chr4	113306786	113307218	mpeak_948	chr4:113218498_113363764_ALPK1_NM_+	+	chr4	113306939	113307065	mpeak_794	chr4_113218498_113362358_ALPK1_NM_+	+	chr4:113306936-113307068|mpeak_948
chr4	143347351	143347840	mpeak_958	chr4:142949181_143767604_INPP4B_NM_-	-	chr4	143347494	143347689	mpeak_797	chr4_142950067_143767604_INPP4B_NM_-	-	chr4:143347501-143347690|mpeak_958
chr4	40936054	40936407	mpeak_936	chr4:40812043_41216635_APBB2_NM_-	-	chr4	40936204	40936256	mpeak_934	chr4_40818276_41216635_APBB2_NM_-	-	chr4:40936204-40936257|mpeak_936
chr4	119608922	119609295	mpeak_950	chr4:119606524_119633425_METTL14_NM_+	+	chr4	119609072	119609136	mpeak_973	chr4_119606524_119631152_METTL14_NM_+	+	chr4:119609072-119609145|mpeak_950
chr4	123155953	123156341	mpeak_952	chr4:123091757_123283914_KIAA1109_NM_+	+	chr4	123156103	123156202	mpeak_974	chr4_123091757_123283185_KIAA1109_NM_+	+	chr4:123156103-123156191|mpeak_952
chr4	54143350	54143719	mpeak_937	chr4:53739150_54232242_SCFD2_NM_-	-	chr4	54143501	54143565	mpeak_266	chr4_53740228_54232242_SCFD2_NM_-	-	chr4:54143500-54143569|mpeak_937
chr4	74014376	74014839	mpeak_939	chr4:73940501_74124502_ANKRD17_NM_-	-	chr4	74014526	74014689	mpeak_267	chr4_73942007_74124502_ANKRD17_NM_-	-	chr4:74014526-74014689|mpeak_939
chr4	102269196	102269564	mpeak_946	chr4:102268933_102270040_FLJ20021_NR_+	+	chr4	102269346	102269414	mpeak_271	chr4_102268933_102269480_FLJ20021_NR_+	+	chr4:102269346-102269414|mpeak_946
chr4	119608922	119609295	mpeak_950	chr4:119606524_119633425_METTL14_NM_+	+	chr4	119609072	119609145	mpeak_273	chr4_119606524_119631152_METTL14_NM_+	+	chr4:119609072-119609145|mpeak_950
chr4	128883963	128884321	mpeak_954	chr4:128838959_128887139_MFSD8_NM_-	-	chr4	128884113	128884171	mpeak_275	chr4_128841991_128887139_MFSD8_NM_-	-	chr4:128884113-128884171|mpeak_954
chr5	148928736	148929127	mpeak_1004	chr5:148875456_148931115_CSNK1A1_NM_-	-	chr5	148928888	148928977	mpeak_456	chr5_148876423_148931115_CSNK1A1_NM_-	-	chr5:148928886-148928977|mpeak_1004
chr5	158636080	158636430	mpeak_1010	chr5:158584416_158637061_RNF145_NM_-	-	chr5	158636230	158636280	mpeak_459	chr5_158586043_158637061_RNF145_NM_-	-	chr5:158636230-158636280|mpeak_1010
chr5	95099050	95099476	mpeak_991	chr5:95066849_95132071_RHOBTB3_NM_+	+	chr5	95099170	95099334	mpeak_443	chr5_95066849_95128762_RHOBTB3_NM_+	+	chr5:95099200-95099326|mpeak_991
chr5	100184615	100184965	mpeak_992	chr5:100142638_100238989_ST8SIA4_NM_-	-	chr5	100184765	100184815	mpeak_836	chr5_100147833_100238989_ST8SIA4_NM_-	-	chr5:100184765-100184815|mpeak_992
chr5	169014180	169014532	mpeak_1015	chr5:169010637_169031781_SPDL1_NM_+	+	chr5	169014330	169014382	mpeak_1061	chr5_169010637_169031063_SPDL1_NM_+	+	chr5:169014330-169014382|mpeak_1015
chr5	169021436	169021839	mpeak_1016	chr5:169010637_169031781_SPDL1_NM_+	+	chr5	169021586	169021689	mpeak_1062	chr5_169010637_169031063_SPDL1_NM_+	+	chr5:169021586-169021689|mpeak_1016
chr5	95099050	95099476	mpeak_991	chr5:95066849_95132071_RHOBTB3_NM_+	+	chr5	95099170	95099333	mpeak_1024	chr5_95066849_95128762_RHOBTB3_NM_+	+	chr5:95099200-95099326|mpeak_991
chr5	112783611	112784049	mpeak_995	chr5:112357795_112824527_MCC_NM_-	-	chr5	112783805	112783882	mpeak_1035	chr5_112363179_112824527_MCC_NM_-	-	chr5:112783761-112783899|mpeak_995
chr5	141314476	141314826	mpeak_1001	chr5:141303384_141321612_KIAA0141_NM_+	+	chr5	141314622	141314676	mpeak_294	chr5_141303384_141318085_KIAA0141_NM_+	+	chr5:141314626-141314676|mpeak_1001
chr5	145864759	145865111	mpeak_1003	chr5:145826872_145891069_TCERG1_NM_+	+	chr5	145864909	145864961	mpeak_296	chr5_145826872_145890003_TCERG1_NM_+	+	chr5:145864909-145864961|mpeak_1003
chr5	153601790	153602150	mpeak_1005	chr5:153570294_153800543_GALNT10_NM_+	+	chr5	153601940	153601999	mpeak_297	chr5_153570294_153796373_GALNT10_NM_+	+	chr5:153601940-153602000|mpeak_1005
chr5	1628652	1629062	mpeak_964	chr5:1597671_1634120_LOC728613_NR_-	-	chr5	1628798	1628879	mpeak_276	chr5_1599942_1634120_LOC728613_NR_-	-	chr5:1628802-1628912|mpeak_964
chr5	111312075	111312442	mpeak_993	chr5:111064999_111312628_NREP_NM_-	-	chr5	111312225	111312292	mpeak_290	chr5_111066743_111312628_NREP_NM_-	-	chr5:111312225-111312292|mpeak_993
chr6	56976653	56977069	mpeak_1044	chr6:56954807_57035098_ZNF451_NM_+	+	chr6	56976803	56976917	mpeak_471	chr6_56954807_57033220_ZNF451_NM_+	+	chr6:56976803-56976919|mpeak_1044
chr6	3081894	3082384	mpeak_1023	chr6:3077057_3115421_RIPK1_NM_+	+	chr6	3082044	3082234	mpeak_861	chr6_3077057_3113286_RIPK1_NM_+	+	chr6:3082044-3082234|mpeak_1023
chr6	17817270	17817623	mpeak_1030	chr6:17759413_17987854_KIF13A_NM_-	-	chr6	17817417	17817483	mpeak_869	chr6_17761108_17987854_KIF13A_NM_-	-	chr6:17817420-17817473|mpeak_1030
chr6	84651191	84651550	mpeak_1050	chr6:84569369_84670146_CYB5R4_NM_+	+	chr6	84651347	84651398	mpeak_894	chr6_84569369_84669542_CYB5R4_NM_+	+	chr6:84651341-84651400|mpeak_1050
chr6	10989780	10990129	mpeak_1026	chr6:10980992_11044624_ELOVL2_NM_-	-	chr6	10989930	10989979	mpeak_1077	chr6_10984139_11044624_ELOVL2_NM_-	-	chr6:10989930-10989979|mpeak_1026
chr6	96970626	96970993	mpeak_1056	chr6:96969701_97003151_UFL1_NM_+	+	chr6	96970779	96970840	mpeak_1099	chr6_96969701_97001160_UFL1_NM_+	+	chr6:96970776-96970843|mpeak_1056
chr6	101253478	101253834	mpeak_1062	chr6:100956070_101329248_ASCC3_NM_-	-	chr6	101253628	101253684	mpeak_1101	chr6_100957409_101329248_ASCC3_NM_-	-	chr6:101253628-101253684|mpeak_1062
chr6	101306742	101307242	mpeak_1063	chr6:100956070_101329248_ASCC3_NM_-	-	chr6	101306888	101307092	mpeak_1102	chr6_100957409_101329248_ASCC3_NM_-	-	chr6:101306892-101307092|mpeak_1063
chr6	106992293	106992645	mpeak_1064	chr6:106959729_107018324_AIM1_NM_+	+	chr6	106992443	106992495	mpeak_1105	chr6_106959729_107016346_AIM1_NM_+	+	chr6:106992443-106992495|mpeak_1064
chr6	159034019	159034484	mpeak_1084	chr6:158957467_159056467_TMEM181_NM_+	+	chr6	159034162	159034421	mpeak_1124	chr6_158957467_159052841_TMEM181_NM_+	+	chr6:159034169-159034334|mpeak_1084
chr6	13588536	13588894	mpeak_1028	chr6:13574760_13615390_SIRT5_NM_+	+	chr6	13588686	13588744	mpeak_301	chr6_13574760_13612021_SIRT5_NM_+	+	chr6:13588686-13588744|mpeak_1028
chr6	32154534	32154954	mpeak_1036	chr6:32152509_32157963_PBX2_NM_-	-	chr6	32154746	32154804	mpeak_305	chr6_32154251_32157963_PBX2_NM_-	-	chr6:32154684-32154804|mpeak_1036
chr6	99859847	99860261	mpeak_1059	chr6:99847840_99873207_PNISR_NM_-	-	chr6	99859997	99860111	mpeak_316	chr6_99849506_99873207_PNISR_NM_-	-	chr6:99859997-99860111|mpeak_1059
chr6	99968828	99969182	mpeak_1061	chr6:99968869_99981059_TSTD3_NM_+	+	chr6	99968978	99969032	mpeak_317	chr6_99968869_99979507_TSTD3_NM_+	+	chr6:99968978-99969032|mpeak_1061
chr6	136732599	136732980	mpeak_1071	chr6:136663418_136871957_MAP7_NM_-	-	chr6	136732749	136732820	mpeak_320	chr6_136665376_136871957_MAP7_NM_-	-	chr6:136732749-136732830|mpeak_1071
chr6	136955120	136955482	mpeak_1073	chr6:136878186_137113656_MAP3K5_NM_-	-	chr6	136955270	136955332	mpeak_321	chr6_136878956_137113656_MAP3K5_NM_-	-	chr6:136955270-136955332|mpeak_1073
chr6	144854124	144854555	mpeak_1074	chr6:144612872_145174170_UTRN_NM_+	+	chr6	144854349	144854399	mpeak_322	chr6_144612872_145172124_UTRN_NM_+	+	chr6:144854274-144854405|mpeak_1074
chr6	166880356	166880717	mpeak_1086	chr6:166822853_167275771_RPS6KA2_NM_-	-	chr6	166880506	166880567	mpeak_327	chr6_166826375_167275771_RPS6KA2_NM_-	-	chr6:166880506-166880567|mpeak_1086
chr6	166999408	166999768	mpeak_1087	chr6:166822853_167275771_RPS6KA2_NM_-	-	chr6	166999560	166999618	mpeak_328	chr6_166826375_167275771_RPS6KA2_NM_-	-	chr6:166999558-166999618|mpeak_1087
chr7	51200208	51200564	mpeak_1104	chr7:51083908_51384515_COBL_NM_-	-	chr7	51200354	51200413	mpeak_494	chr7_51085265_51384515_COBL_NM_-	-	chr7:51200358-51200414|mpeak_1104
chr7	63996677	63997047	mpeak_1106	chr7:63980254_64023505_ZNF680_NM_-	-	chr7	63996827	63996897	mpeak_933	chr7_63982878_64023505_ZNF680_NM_-	-	chr7:63996827-63996897|mpeak_1106
chr7	72234443	72234802	mpeak_1111	chr7:72039491_72298813_TYW1B_NM_-	-	chr7	72234593	72234652	mpeak_934	chr7_72040704_72298813_TYW1B_NM_-	-	chr7:72234593-72234652|mpeak_1111
chr7	128125690	128126048	mpeak_1133	chr7:128116782_128142978_METTL2B_NM_+	+	chr7	128125840	128125898	mpeak_949	chr7_128116782_128141815_METTL2B_NM_+	+	chr7:128125840-128125898|mpeak_1133
chr7	149183404	149183755	mpeak_1145	chr7:149169883_149194898_ZNF746_NM_-	-	chr7	149183554	149183605	mpeak_958	chr7_149172574_149194898_ZNF746_NM_-	-	chr7:149183554-149183605|mpeak_1145
chr7	156757503	156757915	mpeak_1149	chr7:156742416_156765876_NOM1_NM_+	+	chr7	156757653	156757765	mpeak_963	chr7_156742416_156762222_NOM1_NM_+	+	chr7:156757653-156757765|mpeak_1149
chr7	7760654	7761072	mpeak_1098	chr7:7680266_7918851_UMAD1_NM_+	+	chr7	7760806	7760931	mpeak_1133	chr7_7680266_7916911_UMAD1_NM_+	+	chr7:7760804-7760922|mpeak_1098
chr7	129274287	129274642	mpeak_1134	chr7:129251542_129396922_NRF1_NM_+	+	chr7	129274441	129274493	mpeak_1184	chr7_129251542_129394857_NRF1_NM_+	+	chr7:129274437-129274492|mpeak_1134
chr7	135068531	135068888	mpeak_1139	chr7:135046546_135194875_CNOT4_NM_-	-	chr7	135068688	135068764	mpeak_1191	chr7_135047938_135194875_CNOT4_NM_-	-	chr7:135068681-135068738|mpeak_1139
chr7	138943151	138943527	mpeak_1142	chr7:138916230_138992982_UBN2_NM_+	+	chr7	138943301	138943381	mpeak_1197	chr7_138916230_138982532_UBN2_NM_+	+	chr7:138943301-138943377|mpeak_1142
chr7	5528591	5529015	mpeak_1095	chr7:5515427_5553399_FBXL18_NM_-	-	chr7	5528800	5528859	mpeak_330	chr7_5521562_5553399_FBXL18_NM_-	-	chr7:5528741-5528865|mpeak_1095
chr7	42260195	42260621	mpeak_1102	chr7:42000547_42276618_GLI3_NM_-	-	chr7	42260345	42260471	mpeak_333	chr7_42006239_42276618_GLI3_NM_-	-	chr7:42260345-42260471|mpeak_1102
chr7	64259679	64260050	mpeak_1108	chr7:64254765_64294059_ZNF138_NM_+	+	chr7	64259829	64259900	mpeak_335	chr7_64254765_64312176_ZNF138_NR_+	+	chr7:64259829-64259900|mpeak_1108
chr7	72304377	72304752	mpeak_1113	chr7:72299951_72307978_SBDSP1_NR_+	+	chr7	72304450	72304602	mpeak_336	chr7_72299951_72307155_SBDSP1_NR_+	+	chr7:72304527-72304602|mpeak_1113
chr7	108128459	108128809	mpeak_1131	chr7:108110865_108168605_PNPLA8_NM_-	-	chr7	108128609	108128659	mpeak_341	chr7_108113119_108168605_PNPLA8_NM_-	-	chr7:108128609-108128659|mpeak_1131
chr7	143342565	143342935	mpeak_1144	chr7:143318044_143427173_TCAF2_NM_+	+	chr7	143342715	143342785	mpeak_343	chr7_143318044_143424505_TCAF2_NM_+	+	chr7:143342715-143342785|mpeak_1144
chr8	18512994	18513350	mpeak_1153	chr8:18384812_18871196_PSD3_NM_-	-	chr8	18513144	18513200	mpeak_510	chr8_18393468_18871196_PSD3_NM_-	-	chr8:18513144-18513200|mpeak_1153
chr8	68044113	68044472	mpeak_1166	chr8:67976602_68108849_CSPP1_NM_+	+	chr8	68044263	68044322	mpeak_519	chr8_67976602_68107616_CSPP1_NM_+	+	chr8:68044263-68044322|mpeak_1166
chr8	68097373	68097739	mpeak_1170	chr8:67976602_68108849_CSPP1_NM_+	+	chr8	68097523	68097589	mpeak_520	chr8_67976602_68107616_CSPP1_NM_+	+	chr8:68097523-68097589|mpeak_1170
chr8	68097641	68098006	mpeak_1171	chr8:67976602_68108849_CSPP1_NM_+	+	chr8	68097790	68097856	mpeak_521	chr8_67976602_68107616_CSPP1_NM_+	+	chr8:68097791-68097856|mpeak_1171
chr8	38122100	38122491	mpeak_1159	chr8:38120649_38126738_PPAPDC1B_NM_-	-	chr8	38122247	38122341	mpeak_981	chr8_38122122_38126738_PPAPDC1B_NM_-	-	chr8:38122250-38122341|mpeak_1159
chr8	124112991	124113459	mpeak_1192	chr8:124084919_124164392_TBC1D31_NM_+	+	chr8	124113134	124113340	mpeak_1012	chr8_124084919_124164045_TBC1D31_NM_+	+	chr8:124113141-124113309|mpeak_1192
chr8	133844876	133845238	mpeak_1202	chr8:133787603_133861052_PHF20L1_NM_+	+	chr8	133845026	133845088	mpeak_1018	chr8_133787603_133858025_PHF20L1_NM_+	+	chr8:133845026-133845088|mpeak_1202
chr8	141887819	141888178	mpeak_1203	chr8:141668480_142011412_PTK2_NM_-	-	chr8	141887870	141888024	mpeak_1019	chr8_141669777_142011412_PTK2_NM_-	-	chr8:141887969-141888028|mpeak_1203
chr8	33347645	33348008	mpeak_1158	chr8:33342684_33358778_MAK16_NM_+	+	chr8	33347787	33347855	mpeak_1220	chr8_33342684_33355949_MAK16_NM_+	+	chr8:33347795-33347858|mpeak_1158
chr8	61653656	61654135	mpeak_1164	chr8:61591323_61780586_CHD7_NM_+	+	chr8	61653806	61653985	mpeak_1230	chr8_61591323_61777574_CHD7_NM_+	+	chr8:61653806-61653985|mpeak_1164
chr8	62518863	62519275	mpeak_1165	chr8:62413114_62627199_ASPH_NM_-	-	chr8	62519013	62519078	mpeak_1233	chr8_62416068_62627199_ASPH_NM_-	-	chr8:62519013-62519125|mpeak_1165
chr8	42868093	42868458	mpeak_1160	chr8:42752032_42885682_HOOK3_NM_+	+	chr8	42868243	42868308	mpeak_354	chr8_42752032_42873500_HOOK3_NM_+	+	chr8:42868243-42868308|mpeak_1160
chr8	61653656	61654135	mpeak_1164	chr8:61591323_61780586_CHD7_NM_+	+	chr8	61653806	61653863	mpeak_355	chr8_61591323_61777574_CHD7_NM_+	+	chr8:61653806-61653985|mpeak_1164
chr8	131249010	131249394	mpeak_1196	chr8:131064350_131455906_ASAP1_NM_-	-	chr8	131249160	131249244	mpeak_365	chr8_131067051_131455906_ASAP1_NM_-	-	chr8:131249160-131249244|mpeak_1196
chr8	141887819	141888178	mpeak_1203	chr8:141668480_142011412_PTK2_NM_-	-	chr8	141887969	141888028	mpeak_366	chr8_141669777_142011412_PTK2_NM_-	-	chr8:141887969-141888028|mpeak_1203
chr8	144690748	144691100	mpeak_1204	chr8:144686082_144691784_PYCRL_NM_-	-	chr8	144690898	144690950	mpeak_367	chr8_144688052_144691784_PYCRL_NM_-	-	chr8:144690898-144690950|mpeak_1204
chr8	145840853	145841207	mpeak_1206	chr8:145754562_145911197_ARHGAP39_NM_-	-	chr8	145841007	145841057	mpeak_368	chr8_145756000_145911197_ARHGAP39_NM_-	-	chr8:145841003-145841057|mpeak_1206
chr9	95301394	95301770	mpeak_1232	chr9:95087749_95377437_CENPP_NM_+	+	chr9	95301479	95301617	mpeak_536	chr9_95087749_95375300_CENPP_NM_+	+	chr9:95301544-95301620|mpeak_1232
chr9	95301394	95301770	mpeak_1232	chr9:95087749_95377437_CENPP_NM_+	+	chr9	95301749	95301812	mpeak_537	chr9_95087749_95375300_CENPP_NM_+	+	chr9:95301544-95301620|mpeak_1232
chr9	95301601	95301962	mpeak_1233	chr9:95087749_95377437_CENPP_NM_+	+	chr9	95301479	95301617	mpeak_536	chr9_95087749_95375300_CENPP_NM_+	+	chr9:95301751-95301812|mpeak_1233
chr9	95301601	95301962	mpeak_1233	chr9:95087749_95377437_CENPP_NM_+	+	chr9	95301749	95301812	mpeak_537	chr9_95087749_95375300_CENPP_NM_+	+	chr9:95301751-95301812|mpeak_1233
chr9	97784248	97784725	mpeak_1235	chr9:97488950_97849500_C9orf3_NM_+	+	chr9	97784396	97784584	mpeak_539	chr9_97488950_97848963_C9orf3_NM_+	+	chr9:97784398-97784575|mpeak_1235
chr9	5093077	5093572	mpeak_1217	chr9:4985244_5128183_JAK2_NM_+	+	chr9	5093363	5093413	mpeak_1025	chr9_4985244_5126683_JAK2_NM_+	+	chr9:5093227-5093422|mpeak_1217
chr9	115967390	115967740	mpeak_1245	chr9:115927799_115983641_FKBP15_NM_-	-	chr9	115967540	115967590	mpeak_1049	chr9_115928435_115983641_FKBP15_NM_-	-	chr9:115967540-115967590|mpeak_1245
chr9	97784248	97784725	mpeak_1235	chr9:97488950_97849500_C9orf3_NM_+	+	chr9	97784398	97784575	mpeak_1317	chr9_97488950_97848963_C9orf3_NM_+	+	chr9:97784398-97784575|mpeak_1235
chr9	101899988	101900485	mpeak_1242	chr9:101867370_101916473_TGFBR1_NM_+	+	chr9	101900138	101900231	mpeak_1322	chr9_101867370_101911461_TGFBR1_NM_+	+	chr9:101900138-101900335|mpeak_1242
chr9	106891851	106892285	mpeak_1243	chr9:106856540_106903700_SMC2_NM_+	+	chr9	106892001	106892135	mpeak_1323	chr9_106856540_106901419_SMC2_NM_+	+	chr9:106892001-106892135|mpeak_1243
chr9	111752845	111753211	mpeak_1244	chr9:111704848_111775874_CTNNAL1_NM_-	-	chr9	111752997	111753061	mpeak_1328	chr9_111705151_111775874_CTNNAL1_NM_-	-	chr9:111752995-111753061|mpeak_1244
chr9	3501587	3501937	mpeak_1213	chr9:3218296_3526001_RFX3_NM_-	-	chr9	3501737	3501787	mpeak_372	chr9_3225280_3526001_RFX3_NM_-	-	chr9:3501737-3501787|mpeak_1213
chr9	98680642	98681005	mpeak_1237	chr9:98637899_98780735_ERCC6L2_NM_+	+	chr9	98680753	98680855	mpeak_377	chr9_98637899_98774506_ERCC6L2_NM_+	+	chr9:98680792-98680855|mpeak_1237
chr9	101899988	101900485	mpeak_1242	chr9:101867370_101916473_TGFBR1_NM_+	+	chr9	101900138	101900335	mpeak_378	chr9_101867370_101911461_TGFBR1_NM_+	+	chr9:101900138-101900335|mpeak_1242
chr9	126329377	126329739	mpeak_1252	chr9:126141932_126692417_DENND1A_NM_-	-	chr9	126329530	126329589	mpeak_379	chr9_126144904_126692417_DENND1A_NM_-	-	chr9:126329527-126329589|mpeak_1252
chr9	131652454	131652807	mpeak_1256	chr9:131644390_131680317_LRRC8A_NM_+	+	chr9	131652604	131652657	mpeak_382	chr9_131644390_131678374_LRRC8A_NM_+	+	chr9:131652604-131652657|mpeak_1256
chrX	70586971	70587429	mpeak_1272	chrX:70586088_70750375_TAF1_NR_+	+	chrX	70587088	70587197	mpeak_553	chrX_70586088_70749562_TAF1_NR_+	+	chrX:70587121-70587279|mpeak_1272
chrX	122735690	122736153	mpeak_1278	chrX:122734411_122866904_THOC2_NM_-	-	chrX	122736088	122736187	mpeak_1087	chrX_122735189_122866904_THOC2_NM_-	-	chrX:122735840-122736003|mpeak_1278
chrX	69712251	69712602	mpeak_1271	chrX:69664704_69725339_DLG3_NM_+	+	chrX	69712401	69712452	mpeak_1374	chrX_69664704_69722012_DLG3_NM_+	+	chrX:69712401-69712452|mpeak_1271
chrX	109552222	109552580	mpeak_1277	chrX:109437413_109683461_AMMECR1_NM_-	-	chrX	109552372	109552428	mpeak_1380	chrX_109441862_109683461_AMMECR1_NM_-	-	chrX:109552372-109552430|mpeak_1277
chrX	122735690	122736153	mpeak_1278	chrX:122734411_122866904_THOC2_NM_-	-	chrX	122735840	122736006	mpeak_1381	chrX_122735189_122866904_THOC2_NM_-	-	chrX:122735840-122736003|mpeak_1278
chrX	41533910	41534304	mpeak_1265	chrX:41374188_41782287_CASK_NM_-	-	chrX	41534060	41534154	mpeak_385	chrX_41379849_41782287_CASK_NM_-	-	chrX:41534060-41534154|mpeak_1265
chrX	41534139	41534711	mpeak_1266	chrX:41374188_41782287_CASK_NM_-	-	chrX	41534060	41534154	mpeak_385	chrX_41379849_41782287_CASK_NM_-	-	chrX:41534289-41534561|mpeak_1266
chrX	67290654	67291004	mpeak_1270	chrX:67262185_67653299_OPHN1_NM_-	-	chrX	67290793	67290854	mpeak_387	chrX_67267005_67653299_OPHN1_NM_-	-	chrX:67290804-67290854|mpeak_1270
chrX	69712251	69712602	mpeak_1271	chrX:69664704_69725339_DLG3_NM_+	+	chrX	69712402	69712452	mpeak_388	chrX_69664704_69722012_DLG3_NM_+	+	chrX:69712401-69712452|mpeak_1271
chrX	133529168	133529525	mpeak_1279	chrX:133507341_133562822_PHF6_NM_+	+	chrX	133529318	133529375	mpeak_389	chrX_133507341_133559230_PHF6_NM_+	+	chrX:133529318-133529375|mpeak_1279
