# Supplementary material for: Compartment-specific and ELAVL1-coordinated regulation of intronic polyadenylation isoforms by doxorubicin
Source: HighWire-hosted journal article supplement (doi:10.1101/gr.276192.121), 2022-07-01
Supplement: Supplemental_Table_S21.xlsx.xlsx [file Supplemental_Table_S21.xlsx.xlsx]

## Sheet: description
Supplemental Table S21 : Sequence of siRNAs and primers used in this study.

## Sheet: siRNA sequences
siRNA sequences:
	Name	Sequence
siCTRL (pool)	siCTRL-1	UGGUUUACAUGUCGACUAA
	siCTRL-2	UGGUUUACAUGUUGUGUGA
	siCTRL-3	UGGUUUACAUGUUUUCUGA
	siCTRL-4	UGGUUUACAUGUUUUCCUA
siELAVL1 #1 (pool)	siELAVL1-1	GACAAAAUCUUACAGGUUU
	siELAVL1-2	GACAUGUUCUCUCGGUUUG
	siELAVL1-3	ACAAAUAACUCGCUCAUGC
	siELAVL1-4	GCUCAGAGGUGAUCAAAGA
	siELAVL1 #2	GAGGCAAUUACCAGUUUCAUU
	siADARB1 IPA1	GUGAGAAAGCACAGAACAA
	siADARB1 IPA2	GGUUAUGGUUUCGGACUUA
	siBRWD1 IPA1	UCCUAAAGAUAGAGACUAA
	siBRWD1 IPA2	CUGAACAAGUCAUGAAUUU
	siC16ORF72 IPA1	AGGUUUAGGUCCAGAUAUA
	siC16ORF72 IPA2	GUGGGAAAUUGUUGGGUUA
	siCCNL2 IPA1	GCGCUUUGGUGCAGGGACA
	siCCNL2 IPA2	CGAUUGUGCUUCUUGUUAA
	siHOMEZ IPA1	GAUCAGUGGCCUUUGGGAA
	siHOMEZ IPA2	GAAAUGGAGGAUAGGAGAA
	siLDLRAD4 IPA1	CAAGCUGAAUUGAAGAAUA
	siLDLRAD4 IPA2	GGAGAGAAUUUACAUGAUU
	siMAP3K5 IPA1	CCAUACAGACUGAACAUUA
	siMAP3K5 IPA2	GCAGACAGCAAUAAAGAGA
	siPATZ1 IPA1	GAACAGGAGUGAUGAUAAA
	siPATZ1 IPA2	GGAACUAGCCACCAGCUUA
	siSYDE2 IPA1	AGGAAUGGUCAUAGACUUA
	siSYDE2 IPA2	AGUAACAUGUAUAGGGUAU

## Sheet: primer sequences
Primer name	Sequence
ADARB1 IPA F	TTACACACAAGCCAGCTGAC
ADARB1 IPA R	TAGGTAAAGGCTCCTAGTGAGG
ADARB1 LE F	AAGGGTGTGTCGGCTTTTTC
ADARB1 LE R	TGCTGTGGCCAAAAGAAGTG
BRWD1 IPA F	TTGTGTCAAGCTCCATGTCG
BRWD1 IPA R	AAACAGAGAATACGCCCCTACC
BRWD1 LE F	ATGTGCTCTGGGGAATTCTGAG
BRWD1 LE R	TTCAAGGCCTTGCATTCTGG
C16ORF72 IPA F	TCTCATGGGACCTGGGACCT
C16ORF72 IPA R	CAAGGGACCTGAGGGACGAC
C16ORF72 LE F	ACCCCAGGCTCTCCTACACA
C16ORF72 LE R	CCATTGTCCAAGTGGAGTGCC
CCNL2 IPA F	TCTTCAGCCAATCCAGTGCA
CCNL2 IPA R	TCGTCAGAGAACCACAGCAG
CCNL2 LE F	GAAGCCACACAAGTCTCGGA
CCNL2 LE R	GCTCTCGTCGCTGATCTCTG
CELSR1 IPA F	GTAATGTTAGGGGGCGGAGG
CELSR1 IPA R	AGGTGGCATTTCAGGGATGG
CELSR1 LE F	GGCTGGCCAGAGTTCAGGAA
CELSR1 LE R	CTTTGCAAAGGACTGCCCGG
GAREM IPA F	TTTTGAGCAATGGGGAACGC
GAREM IPA R	TGTGGCCTTGCATTCATAGC
GAREM LE F	AAACTGCCCAGCACCTTTTG
GAREM LE R	ACGCTGCTACTGAATTCTGC
HOMEZ IPA F	TGCCTGTGAAATGGAGGATAGG
HOMEZ IPA R	TTCATTCCCAAAGGCCACTG
HOMEZ LE F	AAGGGCTACGGCATAACTCAG
HOMEZ LE R	AGCTGCTCTTTGGTTTTGCG
LDLRAD4 IPA F	TTAGTTTTGCCCTGGTGCTG
LDLRAD4 IPA R	AATTGCAGCCTTCCATGTCC
LDLRAD4 LE F	TGTGCAGCACGAGATTGATC
LDLRAD4 LE R	ACTCTCGGTTGAGTTCCATCTG
MAP3K5 IPA F	ACCGGCTTCAAGAGTCTTGG
MAP3K5 IPA R	TCACCATCCTCCAGTCCAGA
MAP3K5 LE F	GTGCACACTGTGGAAGGCTA
MAP3K5 LE R	TCCCACCCCCAAGAAGATCA
PATZ1 IPA F	TCCAACTAGAGTCAACCCATGC
PATZ1 IPA R	TAGTTTGGTTCCTGAGCAGACC
PATZ1 LE F	TTGTTCAGTCGGCATTTGCG
PATZ1 LE R	TCCGCATTCACAGCATTTCC
SYDE2 IPA F	AAACTGTGCAAGCACCAAGG
SYDE2 IPA R	TGGCCTTACCACCTACTTTAGTC
SYDE2 LE F	AGCAGCTGTGGGGAAAACTAC
SYDE2 LE R	TTCTGGCCCATCCATTTTGC
TBP F	GGAAGGGGCATTATTTGTG
TBP R	GCCCAGATAGCAGCACGGTA
WNK2 IPA F	TGCCTGAGTTCTGTTTGTGC
WNK2 IPA R	TGAAAACCTAGGACAGCAGGTC
WNK2 LE F	AGAGCTTCCATTGCTAGGTGAG
WNK2 LE R	AGCGCAACAACTGACATTCC
